# Supplementary material for: Identification and analysis of the cleavage site in a signal peptide using SMOTE, dagging, and feature selection methods
Source: Royal Society of Chemistry journal article supplement (doi:10.1039/c7mo00030h), 2017-12-20
Supplement: c7mo00030h1.zip [file c7mo00030h1.zip]

**Supplementary Material S2.** The number of protein sequences with signal peptide but without TDs in each organism.

| <b>No.</b> | <b>Organism</b>              | <b>Number of sequence</b> |
|------------|------------------------------|---------------------------|
| 1          | Homo sapiens                 | 442                       |
| 2          | Rattus norvegicus            | 128                       |
| 3          | Escherichia coli             | 123                       |
| 4          | Bos taurus                   | 106                       |
| 5          | Mus musculus                 | 97                        |
| 6          | Sus scrofa                   | 63                        |
| 7          | Bacillus subtilis            | 34                        |
| 8          | Gallus gallus                | 30                        |
| 9          | Arabidopsis thaliana         | 27                        |
| 10         | Oryctolagus cuniculus        | 27                        |
| 11         | Pseudomonas aeruginosa       | 26                        |
| 12         | Oryza sativa subsp. japonica | 23                        |
| 13         | Mesobuthus martensii         | 23                        |
| 14         | Staphylococcus aureus        | 23                        |
| 15         | Drosophila melanogaster      | 19                        |
| 16         | Saccharomyces cerevisiae     | 18                        |
| 17         | Bombyx mori                  | 18                        |
| 18         | Haemophilus influenzae       | 17                        |
| 19         | Canis lupus familiaris       | 16                        |
| 20         | Dictyostelium discoideum     | 15                        |
| 21         | Triticum aestivum            | 15                        |
| 22         | Hordeum vulgare              | 15                        |
| 23         | Protothiopsis flavoviridis   | 14                        |
| 24         | Ophiophagus hannah           | 13                        |
| 25         | Aspergillus niger            | 12                        |
| 26         | Zea mays                     | 12                        |
| 27         | Ovis aries                   | 11                        |
| 28         | Salmonella typhimurium       | 10                        |
| 29         | Equus caballus               | 10                        |
| 30         | Cavia porcellus              | 10                        |
| 31         | Androctonus australis        | 10                        |
| 32         | Manduca sexta                | 9                         |
| 33         | Trimeresurus stejnegeri      | 9                         |
| 34         | Aplysia californica          | 9                         |
| 35         | Solanum lycopersicum         | 9                         |
| 36         | Serratia marcescens          | 8                         |
| 37         | Apis mellifera               | 8                         |
| 38         | Xenopus laevis               | 8                         |

|    |                               |   |
|----|-------------------------------|---|
| 39 | Bacillus sp.                  | 8 |
| 40 | Aspergillus oryzae            | 7 |
| 41 | Bungarus fasciatus            | 7 |
| 42 | Lymnaea stagnalis             | 7 |
| 43 | Lithobates catesbeiana        | 7 |
| 44 | Caenorhabditis elegans        | 7 |
| 45 | Mesobuthus eupeus             | 7 |
| 46 | Bungarus multicinctus         | 7 |
| 47 | Glycine max                   | 7 |
| 48 | Tachypleus tridentatus        | 7 |
| 49 | Allochromatium vinosum        | 7 |
| 50 | Tityus obscurus               | 7 |
| 51 | Naja atra                     | 7 |
| 52 | Tityus discrepans             | 7 |
| 53 | Aedes aegypti                 | 7 |
| 54 | Scolopendra mutilans          | 6 |
| 55 | Arachis hypogaea              | 6 |
| 56 | Micrurus altirostris          | 6 |
| 57 | Galleria mellonella           | 6 |
| 58 | Locusta migratoria            | 6 |
| 59 | Walterinnesia aegyptia        | 6 |
| 60 | Daboia siamensis              | 6 |
| 61 | Streptomyces lividans         | 6 |
| 62 | Nicotiana tabacum             | 6 |
| 63 | Cyprinus carpio               | 6 |
| 64 | Androctonus amoreuxi          | 6 |
| 65 | Neosartorya fumigata          | 6 |
| 66 | Micrurus corallinus           | 6 |
| 67 | Desulfovibrio vulgaris        | 5 |
| 68 | Crassostrea virginica         | 5 |
| 69 | Oncorhynchus keta             | 5 |
| 70 | Pimpla hypochondriaca         | 5 |
| 71 | Felis catus                   | 5 |
| 72 | Vibrio cholerae serotype O1   | 5 |
| 73 | Clostridium thermocellum      | 5 |
| 74 | Daboia russelii               | 5 |
| 75 | Pisum sativum                 | 5 |
| 76 | Mesocricetus auratus          | 5 |
| 77 | Pseudopleuronectes americanus | 5 |
| 78 | Deinagkistrodon acutus        | 5 |
| 79 | Cellvibrio japonicus          | 5 |
| 80 | Homarus americanus            | 4 |
| 81 | Pseudomonas sp.               | 4 |

|     |                                   |   |
|-----|-----------------------------------|---|
| 82  | Bacillus cereus                   | 4 |
| 83  | Aedes albopictus                  | 4 |
| 84  | Candida albicans                  | 4 |
| 85  | Pseudomonas putida                | 4 |
| 86  | Limulus polyphemus                | 4 |
| 87  | Yersinia enterocolitica           | 4 |
| 88  | Dendroaspis angusticeps           | 4 |
| 89  | Oreochromis mossambicus           | 4 |
| 90  | Oligobranchia mashikoi            | 4 |
| 91  | Klebsiella pneumoniae             | 4 |
| 92  | Meleagris gallopavo               | 4 |
| 93  | Leiurus quinquestriatus hebraeus  | 4 |
| 94  | Oxyuranus scutellatus scutellatus | 4 |
| 95  | Protothrops jerdonii              | 4 |
| 96  | Capra hircus                      | 4 |
| 97  | Bacillus circulans                | 4 |
| 98  | Centruroides noxius               | 4 |
| 99  | Macrovipera lebetina              | 4 |
| 100 | Geobacillus stearothermophilus    | 4 |
| 101 | Lens culinaris                    | 4 |
| 102 | Vipera ammodytes ammodytes        | 4 |
| 103 | Entamoeba histolytica             | 4 |
| 104 | Solenopsis invicta                | 4 |
| 105 | Paracoccus denitrificans          | 4 |
| 106 | Chironomus thummi thummi          | 4 |
| 107 | Centruroides sculpturatus         | 4 |
| 108 | Porphyromonas gingivalis          | 4 |
| 109 | Synechococcus elongatus           | 4 |
| 110 | Crotalus durissus terrificus      | 4 |
| 111 | Streptomyces mobaraensis          | 3 |
| 112 | Dickeya chrysanthemi              | 3 |
| 113 | Bacillus anthracis                | 3 |
| 114 | Clostridium perfringens           | 3 |
| 115 | Pseudoxanthomonas mexicana        | 3 |
| 116 | Protothrops mucrosquamatus        | 3 |
| 117 | Shewanella frigidimarina          | 3 |
| 118 | Solanum tuberosum                 | 3 |
| 119 | Tamias sibiricus                  | 3 |
| 120 | Bordetella pertussis              | 3 |
| 121 | Macaca fascicularis               | 3 |
| 122 | Epiphyas postvittana              | 3 |
| 123 | Methylobacterium extorquens       | 3 |
| 124 | Pinctada fucata                   | 3 |

|     |                                        |   |
|-----|----------------------------------------|---|
| 125 | <i>Sarcophaga peregrina</i>            | 3 |
| 126 | <i>Brevibacillus choshinensis</i>      | 3 |
| 127 | <i>Phaseolus vulgaris</i>              | 3 |
| 128 | <i>Vespa magnifica</i>                 | 3 |
| 129 | <i>Cucurbita maxima</i>                | 3 |
| 130 | <i>Proteus mirabilis</i>               | 3 |
| 131 | <i>Anguilla japonica</i>               | 3 |
| 132 | <i>Trimeresurus borneensis</i>         | 3 |
| 133 | <i>Mirabilis jalapa</i>                | 3 |
| 134 | <i>Oncorhynchus mykiss</i>             | 3 |
| 135 | <i>Opisthacanthus madagascariensis</i> | 3 |
| 136 | <i>Schizosaccharomyces pombe</i>       | 3 |
| 137 | <i>Mycobacterium tuberculosis</i>      | 3 |
| 138 | <i>Theromyzon tessulatum</i>           | 3 |
| 139 | <i>Actinidia deliciosa</i>             | 3 |
| 140 | <i>Phanerochaete chrysosporium</i>     | 3 |
| 141 | <i>Rhodobacter sphaeroides</i>         | 3 |
| 142 | <i>Cladrastis kentukea</i>             | 3 |
| 143 | <i>Bothrops jararacussu</i>            | 3 |
| 144 | <i>Gloydus brevicaudus siniticus</i>   | 3 |
| 145 | <i>Hottentotta judaicus</i>            | 3 |
| 146 | <i>Synechocystis</i> sp.               | 3 |
| 147 | <i>Gloydus blomhoffii</i>              | 3 |
| 148 | <i>Bitis gabonica</i>                  | 3 |
| 149 | <i>Anas platyrhynchos</i>              | 3 |
| 150 | <i>Viscum album</i>                    | 3 |
| 151 | <i>Drosophila miranda</i>              | 3 |
| 152 | <i>Phytolacca americana</i>            | 3 |
| 153 | <i>Rhodopseudomonas palustris</i>      | 3 |
| 154 | <i>Holotrichia diomphalia</i>          | 3 |
| 155 | <i>Pedobacter heparinus</i>            | 3 |
| 156 | <i>Pseudonaja textilis</i>             | 3 |
| 157 | <i>Hevea brasiliensis</i>              | 3 |
| 158 | <i>Streptococcus pyogenes</i>          | 3 |
| 159 | <i>Lucilia cuprina</i>                 | 3 |
| 160 | <i>Bubalus bubalis</i>                 | 3 |
| 161 | <i>Dickeya dadantii</i>                | 3 |
| 162 | <i>Enterobacter aerogenes</i>          | 2 |
| 163 | <i>Bryonia dioica</i>                  | 2 |
| 164 | <i>Bothrops pauloensis</i>             | 2 |
| 165 | <i>Lumbricus terrestris</i>            | 2 |
| 166 | <i>Methylophilus methylotrophus</i>    | 2 |
| 167 | <i>Thermosynechococcus elongatus</i>   | 2 |

|     |                                                           |   |
|-----|-----------------------------------------------------------|---|
| 168 | <i>Bitis rhinoceros</i>                                   | 2 |
| 169 | <i>Helicobacter pylori</i>                                | 2 |
| 170 | <i>Elaphe quadrivirgata</i>                               | 2 |
| 171 | <i>Nicotiana langsdorffii</i> x <i>Nicotiana sanderae</i> | 2 |
| 172 | <i>Cannabis sativa</i>                                    | 2 |
| 173 | <i>Petunia hybrida</i>                                    | 2 |
| 174 | <i>Secale cereale</i>                                     | 2 |
| 175 | <i>Vibrio furnissii</i>                                   | 2 |
| 176 | <i>Halomonas elongata</i>                                 | 2 |
| 177 | <i>Dianthus caryophyllus</i>                              | 2 |
| 178 | <i>Acidithiobacillus ferrooxidans</i>                     | 2 |
| 179 | <i>Dermatophagoides pteronyssinus</i>                     | 2 |
| 180 | <i>Orpinomyces</i> sp.                                    | 2 |
| 181 | <i>Escherichia coli</i> O78:H11                           | 2 |
| 182 | <i>Alcaligenes faecalis</i>                               | 2 |
| 183 | <i>Rhizopus oligosporus</i>                               | 2 |
| 184 | <i>Corynebacterium glutamicum</i>                         | 2 |
| 185 | <i>Wolinella succinogenes</i>                             | 2 |
| 186 | <i>Fibrobacter succinogenes</i>                           | 2 |
| 187 | <i>Laticauda colubrina</i>                                | 2 |
| 188 | <i>Salmo salar</i>                                        | 2 |
| 189 | <i>Avena sativa</i>                                       | 2 |
| 190 | <i>Crotalus atrox</i>                                     | 2 |
| 191 | <i>Sphingopyxis</i> sp.                                   | 2 |
| 192 | <i>Suncus murinus</i>                                     | 2 |
| 193 | <i>Blaberus discoidalis</i>                               | 2 |
| 194 | <i>Morganella morganii</i>                                | 2 |
| 195 | <i>Gloydus brevicaudus</i>                                | 2 |
| 196 | <i>Achromobacter cycloclastes</i>                         | 2 |
| 197 | <i>Sagittaria sagittifolia</i>                            | 2 |
| 198 | <i>Penicillium canescens</i>                              | 2 |
| 199 | <i>Molineria latifolia</i>                                | 2 |
| 200 | <i>Mesobuthus tamulus</i>                                 | 2 |
| 201 | <i>Neurospora crassa</i>                                  | 2 |
| 202 | <i>Latrodectus tredecimguttatus</i>                       | 2 |
| 203 | <i>Dromaius novaehollandiae</i>                           | 2 |
| 204 | <i>Enterococcus hirae</i>                                 | 2 |
| 205 | <i>Paracoccus versutus</i>                                | 2 |
| 206 | <i>Tityus serrulatus</i>                                  | 2 |
| 207 | <i>Callithrix jacchus</i>                                 | 2 |
| 208 | <i>Pasteurella multocida</i>                              | 2 |
| 209 | <i>Nitrosomonas europaea</i>                              | 2 |

|     |                                               |   |
|-----|-----------------------------------------------|---|
| 210 | <i>Mytilus galloprovincialis</i>              | 2 |
| 211 | <i>Pyrus pyrifolia</i>                        | 2 |
| 212 | <i>Vibrio parahaemolyticus</i> serotype O3:K6 | 2 |
| 213 | <i>Lonomia obliqua</i>                        | 2 |
| 214 | <i>Conus marmoreus</i>                        | 2 |
| 215 | <i>Centruroides limpidus limpidus</i>         | 2 |
| 216 | <i>Chlamydomonas reinhardtii</i>              | 2 |
| 217 | <i>Perna viridis</i>                          | 2 |
| 218 | <i>Juniperus virginiana</i>                   | 2 |
| 219 | <i>Chlamydia trachomatis</i> serovar L2       | 2 |
| 220 | <i>Hypocrea jecorina</i>                      | 2 |
| 221 | <i>Salmonella enteritidis</i>                 | 2 |
| 222 | <i>Pseudonaja textilis textilis</i>           | 2 |
| 223 | <i>Trichoplusia ni</i>                        | 2 |
| 224 | <i>Pseudomonas syringae</i> pv. tomato        | 2 |
| 225 | <i>Cellulomonas fimi</i>                      | 2 |
| 226 | <i>Tenebrio molitor</i>                       | 2 |
| 227 | <i>Bitis arietans</i>                         | 2 |
| 228 | <i>Anopheles gambiae</i>                      | 2 |
| 229 | <i>Sparus aurata</i>                          | 2 |
| 230 | <i>Crotalus adamanteus</i>                    | 2 |
| 231 | <i>Petromyzon marinus</i>                     | 2 |
| 232 | <i>Clarias gariepinus</i>                     | 2 |
| 233 | <i>Camelus dromedarius</i>                    | 2 |
| 234 | <i>Bothriechis schlegelii</i>                 | 2 |
| 235 | <i>Orconectes limosus</i>                     | 2 |
| 236 | <i>Clostridium cellulolyticum</i>             | 2 |
| 237 | <i>Rhodobacter capsulatus</i>                 | 2 |
| 238 | <i>Pomacea canaliculata</i>                   | 2 |
| 239 | <i>Trimeresurus puniceus</i>                  | 2 |
| 240 | <i>Neisseria meningitidis</i> serogroup B     | 2 |
| 241 | <i>Crotalus viridis viridis</i>               | 2 |
| 242 | <i>Patiria pectinifera</i>                    | 2 |
| 243 | <i>Scutigera coleoptrata</i>                  | 2 |
| 244 | <i>Elizabethkingia miricola</i>               | 2 |
| 245 | <i>Ascaris suum</i>                           | 2 |
| 246 | <i>Gadus morhua</i>                           | 2 |
| 247 | <i>Synechococcus</i> sp.                      | 2 |
| 248 | <i>Bothrops asper</i>                         | 2 |
| 249 | <i>Hyalophora cecropia</i>                    | 2 |
| 250 | <i>Rhodovulum sulfidophilum</i>               | 2 |
| 251 | <i>Juniperus ashei</i>                        | 2 |
| 252 | <i>Myocastor coypus</i>                       | 2 |

|     |                                                                  |   |
|-----|------------------------------------------------------------------|---|
| 253 | <i>Ricinus communis</i>                                          | 2 |
| 254 | <i>Momordica charantia</i>                                       | 2 |
| 255 | <i>Chironex fleckeri</i>                                         | 2 |
| 256 | <i>Campylobacter jejuni</i> subsp. <i>jejuni</i><br>serotype O:2 | 2 |
| 257 | <i>Streptomyces</i> sp.                                          | 2 |
| 258 | <i>Thermoanaerobacterium</i><br><i>thermosulfurigenes</i>        | 2 |
| 259 | <i>Naja sputatrix</i>                                            | 2 |
| 260 | <i>Pinctada maxima</i>                                           | 2 |
| 261 | <i>Raphanus sativus</i>                                          | 2 |
| 262 | <i>Elizabethkingia meningoseptica</i>                            | 2 |
| 263 | <i>Streptomyces chartreusis</i>                                  | 2 |
| 264 | <i>Pantoea cypripedii</i>                                        | 2 |
| 265 | <i>Schistocerca gregaria</i>                                     | 2 |
| 266 | <i>Talaromyces funiculosus</i>                                   | 2 |
| 267 | <i>Coccidioides posadasii</i>                                    | 2 |
| 268 | <i>Mycobacterium bovis</i>                                       | 2 |
| 269 | <i>Trypanosoma brucei brucei</i>                                 | 2 |
| 270 | <i>Cerastes cerastes</i>                                         | 2 |
| 271 | <i>Bothrops insularis</i>                                        | 2 |
| 272 | <i>Escherichia coli</i> O44:H18                                  | 2 |
| 273 | <i>Aspergillus awamori</i>                                       | 2 |
| 274 | <i>Crotalus scutulatus scutulatus</i>                            | 2 |
| 275 | <i>Coxiella burnetii</i>                                         | 2 |
| 276 | <i>Aspergillus kawachii</i>                                      | 2 |
| 277 | <i>Lactobacillus plantarum</i>                                   | 2 |
| 278 | <i>Penicillium citrinum</i>                                      | 2 |
| 279 | <i>Bordetella bronchiseptica</i>                                 | 2 |
| 280 | <i>Rhipicephalus sanguineus</i>                                  | 2 |
| 281 | <i>Laticauda semifasciata</i>                                    | 2 |
| 282 | <i>Streptomyces plicatus</i>                                     | 2 |
| 283 | <i>Paracoccus pantotrophus</i>                                   | 2 |
| 284 | <i>Bothrops jararaca</i>                                         | 2 |
| 285 | <i>Sambucus nigra</i>                                            | 2 |
| 286 | <i>Pseudomonas stutzeri</i>                                      | 2 |
| 287 | <i>Nosema bombycis</i>                                           | 2 |
| 288 | <i>Trichosanthes kirilowii</i>                                   | 2 |
| 289 | <i>Buthus occitanus tunetanus</i>                                | 2 |
| 290 | <i>Aspergillus aculeatus</i>                                     | 2 |
| 291 | <i>Gymnadenia conopsea</i>                                       | 1 |
| 292 | <i>Cricetus cricetus</i>                                         | 1 |
| 293 | <i>Ambrosia artemisiifolia</i>                                   | 1 |

|     |                                       |   |
|-----|---------------------------------------|---|
| 294 | Hydrogenophilus thermoluteolus        | 1 |
| 295 | Vibrio sp.                            | 1 |
| 296 | Brachyspira hyodysenteriae            | 1 |
| 297 | Trichoderma harzianum                 | 1 |
| 298 | Trimeresurus gracilis                 | 1 |
| 299 | Platanus acerifolia                   | 1 |
| 300 | Micrococcus luteus                    | 1 |
| 301 | Neisseria gonorrhoeae                 | 1 |
| 302 | Pseudomonas fluorescens               | 1 |
| 303 | Takifugu pardalis                     | 1 |
| 304 | Listeria monocytogenes serovar 1/2a   | 1 |
| 305 | Streptococcus mutans                  | 1 |
| 306 | Pseudoalteromonas haloplanktis        | 1 |
| 307 | Naja kaouthia                         | 1 |
| 308 | Cupriavidus metallidurans             | 1 |
| 309 | Polybia paulista                      | 1 |
| 310 | Hydrogenobacter thermophilus          | 1 |
| 311 | Bothrops moojeni                      | 1 |
| 312 | Coturnix coturnix japonica            | 1 |
| 313 | Bauhinia purpurea                     | 1 |
| 314 | Thermoanaerobacterium saccharolyticum | 1 |
| 315 | Psoroptes ovis                        | 1 |
| 316 | Lipomyces kononenkoae                 | 1 |
| 317 | Streptococcus agalactiae              | 1 |
| 318 | Antheraea mylitta                     | 1 |
| 319 | Aspergillus ficuum                    | 1 |
| 320 | Talaromyces stipitatus                | 1 |
| 321 | Argyrosomus regius                    | 1 |
| 322 | Flammulina velutipes                  | 1 |
| 323 | Alteromonas sp.                       | 1 |
| 324 | Armadillidium vulgare                 | 1 |
| 325 | Burkholderia glumae                   | 1 |
| 326 | Desulfitobacterium hafniense          | 1 |
| 327 | Bothrops atrox                        | 1 |
| 328 | Centruroides suffusus suffusus        | 1 |
| 329 | Methylobacterium organophilum         | 1 |
| 330 | Thermococcus kodakarensis             | 1 |
| 331 | Clostridium botulinum C phage         | 1 |
| 332 | Aspergillus clavatus                  | 1 |
| 333 | Tetronarce californica                | 1 |
| 334 | Rhizobium radiobacter                 | 1 |
| 335 | Halocynthia roretzi                   | 1 |
| 336 | Porcellio scaber                      | 1 |



|     |                                                    |   |
|-----|----------------------------------------------------|---|
| 337 | <i>Photobacterium profundum</i>                    | 1 |
| 338 | <i>Clostridium cellulovorans</i>                   | 1 |
| 339 | <i>Shigella flexneri</i>                           | 1 |
| 340 | <i>Thioalkalivibrio nitratreducens</i>             | 1 |
| 341 | <i>Conus virgo</i>                                 | 1 |
| 342 | <i>Austrelaps labialis</i>                         | 1 |
| 343 | <i>Chlorobium tepidum</i>                          | 1 |
| 344 | <i>Rhabdophis tigrinus tigrinus</i>                | 1 |
| 345 | <i>Pseudechis australis</i>                        | 1 |
| 346 | <i>Lactococcus lactis</i> subsp. <i>cremoris</i>   | 1 |
| 347 | <i>Aipysurus laevis</i>                            | 1 |
| 348 | <i>Streptomyces halstedii</i>                      | 1 |
| 349 | <i>Pleurodeles waltl</i>                           | 1 |
| 350 | <i>Photobacterium</i> sp.                          | 1 |
| 351 | <i>Mesobuthus gibbosus</i>                         | 1 |
| 352 | <i>Macaca mulatta</i>                              | 1 |
| 353 | <i>Gaeumannomyces graminis</i> var. <i>tritici</i> | 1 |
| 354 | <i>Staphylococcus hyicus</i>                       | 1 |
| 355 | <i>Notechis scutatus scutatus</i>                  | 1 |
| 356 | <i>Tityus trivittatus</i>                          | 1 |
| 357 | <i>Conus betulinus</i>                             | 1 |
| 358 | <i>Tityus stigmurus</i>                            | 1 |
| 359 | <i>Pseudomonas alginovora</i>                      | 1 |
| 360 | <i>Corynephage beta</i>                            | 1 |
| 361 | <i>Ustilago maydis</i> P4 virus                    | 1 |
| 362 | <i>Pinctada margaritifera</i>                      | 1 |
| 363 | <i>Streptomyces exfoliatus</i>                     | 1 |
| 364 | <i>Musca domestica</i>                             | 1 |
| 365 | <i>Amaranthus retroflexus</i>                      | 1 |
| 366 | <i>Protophormia terraenovae</i>                    | 1 |
| 367 | <i>Oncorhynchus kisutch</i>                        | 1 |
| 368 | <i>Escherichia coli</i> O127:H6                    | 1 |
| 369 | <i>Chilobrachys guangxiensis</i>                   | 1 |
| 370 | <i>Liocheles australasiae</i>                      | 1 |
| 371 | <i>Streptococcus pyogenes</i> serotype M5          | 1 |
| 372 | <i>Bacillus mannanilyticus</i>                     | 1 |
| 373 | <i>Streptococcus pyogenes</i> serotype M1          | 1 |
| 374 | <i>Actinia equina</i>                              | 1 |
| 375 | <i>Torpedo marmorata</i>                           | 1 |
| 376 | <i>Chlamydia trachomatis</i>                       | 1 |
| 377 | <i>Opisthophthalmus carinatus</i>                  | 1 |
| 378 | <i>Argas reflexus</i>                              | 1 |
| 379 | <i>Humicola grisea</i> var. <i>thermoidea</i>      | 1 |

|     |                                               |   |
|-----|-----------------------------------------------|---|
| 380 | <i>Rhipicephalus bursa</i>                    | 1 |
| 381 | <i>Thermobifida fusca</i>                     | 1 |
| 382 | <i>Thermus thermophilus</i>                   | 1 |
| 383 | <i>Cryphonectria parasitica</i>               | 1 |
| 384 | <i>Achromobacter denitrificans</i>            | 1 |
| 385 | <i>Agaricus xanthodermus</i>                  | 1 |
| 386 | <i>Nicotiana alata</i>                        | 1 |
| 387 | <i>Achatina achatina</i>                      | 1 |
| 388 | <i>Pseudoalteromonas</i> sp.                  | 1 |
| 389 | <i>Comamonas testosteroni</i>                 | 1 |
| 390 | <i>Heliothis virescens</i>                    | 1 |
| 391 | <i>Alcaligenes</i> sp.                        | 1 |
| 392 | <i>Dalbergia nigrescens</i>                   | 1 |
| 393 | <i>Vibrio alginolyticus</i>                   | 1 |
| 394 | <i>Proteus vulgaris</i>                       | 1 |
| 395 | <i>Clostridium stercorarium</i>               | 1 |
| 396 | <i>Chelonus</i> sp. nr. <i>curvimaculatus</i> | 1 |
| 397 | <i>Pinus monticola</i>                        | 1 |
| 398 | <i>Tityus costatus</i>                        | 1 |
| 399 | <i>Bungarus flaviceps flaviceps</i>           | 1 |
| 400 | <i>Schistocerca americana</i>                 | 1 |
| 401 | <i>Conus striatus</i>                         | 1 |
| 402 | <i>Crocodylus porosus</i>                     | 1 |
| 403 | <i>Lens culinaris</i> subsp. <i>culinaris</i> | 1 |
| 404 | <i>Ambrosia psilostachya</i>                  | 1 |
| 405 | <i>Encephalitozoon cuniculi</i>               | 1 |
| 406 | <i>Saccharopolyspora erythraea</i>            | 1 |
| 407 | <i>Vicia sativa</i> subsp. <i>nigra</i>       | 1 |
| 408 | <i>Arthrobacter viscosus</i>                  | 1 |
| 409 | <i>Saponaria officinalis</i>                  | 1 |
| 410 | <i>Lutzomyia longipalpis</i>                  | 1 |
| 411 | <i>Pandinus imperator</i>                     | 1 |
| 412 | <i>Anuroctonus phaiodactylus</i>              | 1 |
| 413 | <i>Candida tsukubaensis</i>                   | 1 |
| 414 | <i>Parabuthus granulatus</i>                  | 1 |
| 415 | <i>Cryptorchestia cavimana</i>                | 1 |
| 416 | <i>Macrovipera lebetina transmediterranea</i> | 1 |
| 417 | <i>Trichosanthes anguina</i>                  | 1 |
| 418 | <i>Hybomitra bimaculata</i>                   | 1 |
| 419 | <i>Ictalurus punctatus</i>                    | 1 |
| 420 | <i>Canavalia gladiata</i>                     | 1 |
| 421 | <i>Aureobasidium pullulans</i>                | 1 |
| 422 | <i>Struthio camelus</i>                       | 1 |

|     |                                                 |   |
|-----|-------------------------------------------------|---|
| 423 | <i>Gibberella fujikuroi</i>                     | 1 |
| 424 | <i>Leucoagaricus meleagris</i>                  | 1 |
| 425 | <i>Methanocaldococcus jannaschii</i>            | 1 |
| 426 | <i>Burkholderia cepacia</i>                     | 1 |
| 427 | <i>Cupriavidus necator</i>                      | 1 |
| 428 | <i>Myxine glutinosa</i>                         | 1 |
| 429 | <i>Pelophylax esculentus</i>                    | 1 |
| 430 | <i>Streptococcus pneumoniae</i>                 | 1 |
| 431 | <i>Oreochromis niloticus</i>                    | 1 |
| 432 | <i>Phytophthora cryptogea</i>                   | 1 |
| 433 | <i>Castellaniella defragrans</i>                | 1 |
| 434 | <i>Lepidoglyphus destructor</i>                 | 1 |
| 435 | <i>Rhopalurus junceus</i>                       | 1 |
| 436 | <i>Claviceps fusiformis</i>                     | 1 |
| 437 | <i>Androctonus mauritanicus mauritanicus</i>    | 1 |
| 438 | <i>Heliothis armigera entomopoxvirus</i>        | 1 |
| 439 | <i>Enterobacter agglomerans</i>                 | 1 |
| 440 | <i>Phaseolus angularis</i>                      | 1 |
| 441 | <i>Prunus serotina</i>                          | 1 |
| 442 | <i>Apium graveolens</i>                         | 1 |
| 443 | <i>Methanosarcina thermophila</i>               | 1 |
| 444 | <i>Pseudomonas syringae</i> pv. <i>syringae</i> | 1 |
| 445 | <i>Psychrobacter immobilis</i>                  | 1 |
| 446 | <i>Geotrichum candidum</i>                      | 1 |
| 447 | <i>Streptomyces tendae</i>                      | 1 |
| 448 | <i>Xanthomonas manihotis</i>                    | 1 |
| 449 | <i>Ananas comosus</i>                           | 1 |
| 450 | <i>Poecilobdella manillensis</i>                | 1 |
| 451 | <i>Geotrichum</i> sp.                           | 1 |
| 452 | <i>Desulfovibrio gigas</i>                      | 1 |
| 453 | <i>Streptomyces avidinii</i>                    | 1 |
| 454 | <i>Agaricus bisporus</i>                        | 1 |
| 455 | <i>Clostridium botulinum</i> D phage            | 1 |
| 456 | <i>Bothrops erythromelas</i>                    | 1 |
| 457 | <i>Morone saxatilis</i>                         | 1 |
| 458 | <i>Brucella abortus</i> biovar 1                | 1 |
| 459 | <i>Pycnopus cinnabarinus</i>                    | 1 |
| 460 | <i>Didelphis virginiana</i>                     | 1 |
| 461 | <i>Danio rerio</i>                              | 1 |
| 462 | <i>Ixodes scapularis</i>                        | 1 |
| 463 | <i>Phyllodiscus semoni</i>                      | 1 |
| 464 | <i>Methanothermus fervidus</i>                  | 1 |
| 465 | <i>Cryptococcus albidus</i>                     | 1 |

|     |                                                 |   |
|-----|-------------------------------------------------|---|
| 466 | <i>Cotesia rubecula</i>                         | 1 |
| 467 | <i>Pectobacterium carotovorum</i>               | 1 |
| 468 | <i>Streptomyces globisporus</i>                 | 1 |
| 469 | <i>Vicia faba</i>                               | 1 |
| 470 | <i>Alternaria solani</i>                        | 1 |
| 471 | <i>Ophiostoma ulmi</i>                          | 1 |
| 472 | <i>Stomoxys calcitrans</i>                      | 1 |
| 473 | <i>Aplysia kurodai</i>                          | 1 |
| 474 | <i>Opisthacanthus cayaporum</i>                 | 1 |
| 475 | <i>Ralstonia solanacearum</i>                   | 1 |
| 476 | <i>Enterococcus faecium</i>                     | 1 |
| 477 | <i>Gynostemma pentaphyllum</i>                  | 1 |
| 478 | <i>Cricetulus longicaudatus</i>                 | 1 |
| 479 | <i>Rhipicephalus microplus</i>                  | 1 |
| 480 | <i>Fusarium solani</i> subsp. <i>phaseoli</i>   | 1 |
| 481 | <i>Paenibacillus polymyxa</i>                   | 1 |
| 482 | <i>Cryptomeria japonica</i>                     | 1 |
| 483 | <i>Methylomonas</i> sp.                         | 1 |
| 484 | <i>Starkeya novella</i>                         | 1 |
| 485 | <i>Cimex lectularius</i>                        | 1 |
| 486 | <i>Polysphondylium pallidum</i>                 | 1 |
| 487 | <i>Ideonella dechloratans</i>                   | 1 |
| 488 | <i>Phalaris aquatica</i>                        | 1 |
| 489 | <i>Helianthus annuus</i>                        | 1 |
| 490 | <i>Vipera renardi</i>                           | 1 |
| 491 | <i>Haemophilus ducreyi</i>                      | 1 |
| 492 | <i>Methylosinus trichosporium</i>               | 1 |
| 493 | <i>Bufo gargarizans andrewsi</i>                | 1 |
| 494 | <i>Thermoanaerobacter thermohydrosulfuricus</i> | 1 |
| 495 | <i>Illawarra wisharti</i>                       | 1 |
| 496 | <i>Monoplex parthenopeus</i>                    | 1 |
| 497 | <i>Nephotettix cincticeps</i>                   | 1 |
| 498 | <i>Lactobacillus helveticus</i>                 | 1 |
| 499 | <i>Legionella pneumophila</i>                   | 1 |
| 500 | <i>Sorex araneus</i>                            | 1 |
| 501 | <i>Eratigena agrestis</i>                       | 1 |
| 502 | <i>Streptomyces rimosus</i>                     | 1 |
| 503 | <i>Desulfovibrio desulfuricans</i>              | 1 |
| 504 | <i>Streptomyces reticuli</i>                    | 1 |
| 505 | <i>Streptomyces scabiei</i>                     | 1 |
| 506 | <i>Olea europaea</i>                            | 1 |
| 507 | <i>Fenneropenaeus merguensis</i>                | 1 |

|     |                                    |   |
|-----|------------------------------------|---|
| 508 | Cupiennius salei                   | 1 |
| 509 | Panax ginseng                      | 1 |
| 510 | Protobothrops elegans              | 1 |
| 511 | Aeromonas salmonicida              | 1 |
| 512 | Dermatophagoides farinae           | 1 |
| 513 | Lolium perenne                     | 1 |
| 514 | Zoarcetes americanus               | 1 |
| 515 | Trichosurus vulpecula              | 1 |
| 516 | Acinetobacter calcoaceticus        | 1 |
| 517 | Neovison vison                     | 1 |
| 518 | Gibberella zeae                    | 1 |
| 519 | Glossina morsitans morsitans       | 1 |
| 520 | Streptomyces nigrescens            | 1 |
| 521 | Oryctes rhinoceros                 | 1 |
| 522 | Deinococcus radiodurans            | 1 |
| 523 | Calloselasma rhodostoma            | 1 |
| 524 | Leishmania amazonensis             | 1 |
| 525 | Macropus giganteus                 | 1 |
| 526 | Corynebacterium pseudotuberculosis | 1 |
| 527 | Populus deltoides                  | 1 |
| 528 | Vipera nikolskii                   | 1 |
| 529 | Spinacia oleracea                  | 1 |
| 530 | Echis multisquamatus               | 1 |
| 531 | Pseudoalteromonas piscicida        | 1 |
| 532 | Flavobacterium sp.                 | 1 |
| 533 | Typhlonectes natans                | 1 |
| 534 | Trimeresurus gramineus             | 1 |
| 535 | Micromonospora viridifaciens       | 1 |
| 536 | Phlebia radiata                    | 1 |
| 537 | Streptococcus parasanguinis        | 1 |
| 538 | Aeromonas hydrophila               | 1 |
| 539 | Polistes exclamans                 | 1 |
| 540 | Chlamydophila psittaci             | 1 |
| 541 | Laticauda laticaudata              | 1 |
| 542 | Cerrophidion godmani               | 1 |
| 543 | Thauera selenatis                  | 1 |
| 544 | Procambarus clarkii                | 1 |
| 545 | Hypocrea rufa                      | 1 |
| 546 | Hya araneus                        | 1 |
| 547 | Bradyrhizobium diazoefficiens      | 1 |
| 548 | Acanthaster planci                 | 1 |
| 549 | Scylla serrata                     | 1 |
| 550 | Bungarus candidus                  | 1 |

|     |                                                   |   |
|-----|---------------------------------------------------|---|
| 551 | <i>Penicillium camembertii</i>                    | 1 |
| 552 | <i>Ajellomyces capsulatus</i>                     | 1 |
| 553 | <i>Robillarda</i> sp.                             | 1 |
| 554 | <i>Streptococcus downei</i>                       | 1 |
| 555 | <i>Dendroaspis polylepis polylepis</i>            | 1 |
| 556 | <i>Atropoides nummifer</i>                        | 1 |
| 557 | <i>Pseudomonas taetrolens</i>                     | 1 |
| 558 | <i>Zootoca vivipara</i>                           | 1 |
| 559 | <i>Megabalanus rosa</i>                           | 1 |
| 560 | <i>Vipera berus berus</i>                         | 1 |
| 561 | <i>Anisakis simplex</i>                           | 1 |
| 562 | <i>Semnopithecus entellus</i>                     | 1 |
| 563 | <i>Bombina orientalis</i>                         | 1 |
| 564 | <i>Brevibacillus brevis</i>                       | 1 |
| 565 | <i>Gluconacetobacter diazotrophicus</i>           | 1 |
| 566 | <i>Streptomyces albus</i> G                       | 1 |
| 567 | <i>Porphyromonas endodontalis</i>                 | 1 |
| 568 | <i>Urtica dioica</i>                              | 1 |
| 569 | <i>Papio anubis</i>                               | 1 |
| 570 | <i>Myroides odoratus</i>                          | 1 |
| 571 | <i>Treponema maltophilum</i>                      | 1 |
| 572 | <i>Streptococcus uberis</i>                       | 1 |
| 573 | <i>Meriones unguiculatus</i>                      | 1 |
| 574 | <i>Physarum polycephalum</i>                      | 1 |
| 575 | <i>Streptococcus</i> sp. group G                  | 1 |
| 576 | <i>Lachesis muta</i>                              | 1 |
| 577 | <i>Photobacterium leiognathi</i>                  | 1 |
| 578 | <i>Bacillus licheniformis</i>                     | 1 |
| 579 | <i>Actinomyces viscosus</i>                       | 1 |
| 580 | <i>Monodelphis domestica</i>                      | 1 |
| 581 | <i>Escherichia coli</i> O6:K15:H31                | 1 |
| 582 | <i>Magnaporthe grisea</i>                         | 1 |
| 583 | <i>Brucella abortus</i>                           | 1 |
| 584 | <i>Tyria jacobaeae</i>                            | 1 |
| 585 | <i>Trametes versicolor</i>                        | 1 |
| 586 | <i>Desulfovibrio africanus</i>                    | 1 |
| 587 | <i>Rhizopus oryzae</i>                            | 1 |
| 588 | <i>Tityus zulianus</i>                            | 1 |
| 589 | <i>Erythrina corallodendron</i>                   | 1 |
| 590 | <i>Mytilus edulis</i>                             | 1 |
| 591 | <i>Streptomyces griseus</i> subsp. <i>griseus</i> | 1 |
| 592 | <i>Haliotis rufescens</i>                         | 1 |
| 593 | <i>Sphingosinicella xenopeptidilytica</i>         | 1 |

|     |                                                              |   |
|-----|--------------------------------------------------------------|---|
| 594 | <i>Rhizobium leguminosarum</i> bv. <i>viciae</i>             | 1 |
| 595 | <i>Chlorobaculum thiosulfatophilum</i>                       | 1 |
| 596 | <i>Paenibacillus</i> sp.                                     | 1 |
| 597 | <i>Artemisia vulgaris</i>                                    | 1 |
| 598 | <i>Rhodomicrobium vannielii</i>                              | 1 |
| 599 | <i>Hydrophis cyanocinctus</i>                                | 1 |
| 600 | <i>Acanthoscurria gomesiana</i>                              | 1 |
| 601 | <i>Vaejovis mexicanus</i>                                    | 1 |
| 602 | <i>Blastochloris viridis</i>                                 | 1 |
| 603 | <i>Allium sativum</i>                                        | 1 |
| 604 | <i>Vaccinia virus</i>                                        | 1 |
| 605 | <i>Amaranthus caudatus</i>                                   | 1 |
| 606 | <i>Androctonus crassicauda</i>                               | 1 |
| 607 | <i>Sinapis alba</i>                                          | 1 |
| 608 | <i>Sorghum bicolor</i>                                       | 1 |
| 609 | <i>Gluconobacter thailandicus</i>                            | 1 |
| 610 | <i>Spodoptera litura</i>                                     | 1 |
| 611 | <i>Prunus avium</i>                                          | 1 |
| 612 | <i>Cryptococcus neoformans</i> var.<br>neoformans serotype D | 1 |
| 613 | <i>Myzus persicae</i>                                        | 1 |
| 614 | <i>Aspergillus tubingensis</i>                               | 1 |
| 615 | <i>Micrurus tener tener</i>                                  | 1 |
| 616 | <i>Oryza sativa</i> subsp. <i>indica</i>                     | 1 |
| 617 | <i>Antheraea polyphemus</i>                                  | 1 |
| 618 | <i>Zinnia violacea</i>                                       | 1 |
| 619 | <i>Phaseolus lunatus</i>                                     | 1 |
| 620 | <i>Heteractis crispa</i>                                     | 1 |
| 621 | <i>Ptilota filicina</i>                                      | 1 |
| 622 | <i>Ruminococcus albus</i>                                    | 1 |
| 623 | <i>Aspergillus terreus</i>                                   | 1 |
| 624 | <i>Escherichia coli</i> O18:K1:H7                            | 1 |
| 625 | <i>Tulipa bakeri</i>                                         | 1 |
| 626 | <i>Butyrivibrio fibrisolvens</i>                             | 1 |
| 627 | <i>Enterococcus faecalis</i>                                 | 1 |
| 628 | <i>Haementeria officinalis</i>                               | 1 |
| 629 | <i>Roseobacter denitrificans</i>                             | 1 |
| 630 | <i>Daucus carota</i>                                         | 1 |
| 631 | <i>Schistocerca nitens</i>                                   | 1 |
| 632 | <i>Cucumis sativus</i>                                       | 1 |
| 633 | <i>Rhinella marina</i>                                       | 1 |
| 634 | <i>Paralichthys olivaceus</i>                                | 1 |
| 635 | <i>Streptomyces carzinostaticus</i>                          | 1 |

|     |                                                                |   |
|-----|----------------------------------------------------------------|---|
| 636 | <i>Robinia pseudoacacia</i>                                    | 1 |
| 637 | <i>Capsicum annuum</i>                                         | 1 |
| 638 | <i>Grifola frondosa</i>                                        | 1 |
| 639 | <i>Rhodospirillum rubrum</i>                                   | 1 |
| 640 | <i>Streptococcus dysgalactiae</i> subsp.<br><i>equisimilis</i> | 1 |
| 641 | <i>Buthus occitanus israelis</i>                               | 1 |
| 642 | <i>Canavalia ensiformis</i>                                    | 1 |
| 643 | <i>Lophius americanus</i>                                      | 1 |
| 644 | <i>Streptococcus pyogenes</i> serotype M49                     | 1 |
| 645 | <i>Tityus bahiensis</i>                                        | 1 |
| 646 | <i>Bacillus halodurans</i>                                     | 1 |
| 647 | <i>Agkistrodon contortrix laticinctus</i>                      | 1 |
| 648 | <i>Phasianus colchicus colchicus</i>                           | 1 |
| 649 | <i>Echis ocellatus</i>                                         | 1 |
| 650 | <i>Bacillus amyloliquefaciens</i>                              | 1 |
| 651 | <i>Klebsiella oxytoca</i>                                      | 1 |
| 652 | <i>Dendrobium findlayanum</i>                                  | 1 |
| 653 | <i>Brassica oleracea</i> var. <i>botrytis</i>                  | 1 |
| 654 | <i>Gastrophysa atrocyanea</i>                                  | 1 |
| 655 | <i>Abrus precatorius</i>                                       | 1 |
| 656 | <i>Catharanthus roseus</i>                                     | 1 |
| 657 | <i>Actinomadura</i> sp.                                        | 1 |
| 658 | <i>Alteromonas agarilytica</i>                                 | 1 |
| 659 | <i>Pseudomonas chlororaphis</i>                                | 1 |
| 660 | <i>Ovophis okinavensis</i>                                     | 1 |
| 661 | <i>Hadrurus gertschi</i>                                       | 1 |
| 662 | <i>Methanococcus voltae</i>                                    | 1 |
| 663 | <i>Lilium longiflorum</i>                                      | 1 |
| 664 | <i>Scutellaria baicalensis</i>                                 | 1 |
| 665 | <i>Streptomyces longisporus</i>                                | 1 |
| 666 | <i>Macropus eugenii</i>                                        | 1 |
| 667 | <i>Vibrio mimicus</i>                                          | 1 |
| 668 | <i>Streptomyces macromomyceticus</i>                           | 1 |
| 669 | <i>Stichodactyla haddoni</i>                                   | 1 |
| 670 | <i>Phytolacca heterotepala</i>                                 | 1 |
| 671 | <i>Morus alba</i>                                              | 1 |
| 672 | <i>Spirochaeta aurantia</i>                                    | 1 |
| 673 | <i>Thermoascus aurantiacus</i>                                 | 1 |
| 674 | <i>Pseudoalteromonas carrageenovora</i>                        | 1 |
| 675 | <i>Silurus asotus</i>                                          | 1 |
| 676 | <i>Sphingobacterium multivorum</i>                             | 1 |
| 677 | <i>Crotalus oreganus helleri</i>                               | 1 |



|     |                                                     |   |
|-----|-----------------------------------------------------|---|
| 678 | <i>Paenibacillus macerans</i>                       | 1 |
| 679 | <i>Penaeus japonicus</i>                            | 1 |
| 680 | <i>Photorhabdus luminescens</i>                     | 1 |
| 681 | <i>Heloderma horridum horridum</i>                  | 1 |
| 682 | <i>Streptomyces albogriseolus</i>                   | 1 |
| 683 | <i>Aspergillus restrictus</i>                       | 1 |
| 684 | <i>Xanthomonas campestris</i> pv. <i>campestris</i> | 1 |
| 685 | <i>Geobacter metallireducens</i>                    | 1 |
| 686 | <i>Haplochromis burtoni</i>                         | 1 |
| 687 | <i>Citrobacter koseri</i>                           | 1 |
| 688 | <i>Myoxocephalus octodecemspinosus</i>              | 1 |
| 689 | <i>Choristoneura biennis</i> entomopoxvirus         | 1 |
| 690 | <i>Lepidobatrachus laevis</i>                       | 1 |
| 691 | <i>Schizaphis graminum</i>                          | 1 |
| 692 | <i>Enterobacter cloacae</i>                         | 1 |
| 693 | <i>Azotobacter vinelandii</i>                       | 1 |
| 694 | <i>Schizophyllum commune</i>                        | 1 |
| 695 | <i>Carcinus maenas</i>                              | 1 |
| 696 | <i>Komagataeibacter hansenii</i>                    | 1 |
| 697 | <i>Mycobacterium smegmatis</i>                      | 1 |
| 698 | <i>Anoplius samariensis</i>                         | 1 |
| 699 | <i>Salmonella dublin</i>                            | 1 |
| 700 | <i>Leiurus quinquestriatus quinquestriatus</i>      | 1 |
| 701 | <i>Rhizopus niveus</i>                              | 1 |
| 702 | <i>Cellulomonas uda</i>                             | 1 |
| 703 | <i>Acetobacter aceti</i>                            | 1 |
| 704 | <i>Escherichia coli</i> O6:H1                       | 1 |
| 705 | <i>Methylococcus capsulatus</i>                     | 1 |
| 706 | <i>Macadamia integrifolia</i>                       | 1 |
| 707 | <i>Aspergillus giganteus</i>                        | 1 |
| 708 | <i>Psophocarpus tetragonolobus</i>                  | 1 |
| 709 | <i>Octodon degus</i>                                | 1 |
| 710 | Rat cytomegalovirus                                 | 1 |
| 711 | <i>Synsepalum dulcificum</i>                        | 1 |
| 712 | <i>Urodacus yaschenkoi</i>                          | 1 |
| 713 | <i>Armoracia rusticana</i>                          | 1 |
| 714 | <i>Anguilla anguilla</i>                            | 1 |
| 715 | <i>Escherichia coli</i> O157:H7                     | 1 |
| 716 | <i>Streptococcus pyogenes</i> serotype M18          | 1 |
| 717 | <i>Sistrurus catenatus tergeminus</i>               | 1 |
| 718 | <i>Nostoc commune</i>                               | 1 |
| 719 | <i>Pinus contorta</i>                               | 1 |
| 720 | <i>Litopenaeus vannamei</i>                         | 1 |

|     |                           |   |
|-----|---------------------------|---|
| 721 | Paenibacillus alvei       | 1 |
| 722 | Leuconostoc mesenteroides | 1 |
