# Supplementary material for: Identification and analysis of the cleavage site in a signal peptide using SMOTE, dagging, and feature selection methods
Source: Royal Society of Chemistry journal article supplement (doi:10.1039/c7mo00030h), 2017-12-20
Supplement: c7mo00030h1.zip [file c7mo00030h1.zip]

**Supplementary Material S1.** 2,683 UniProt IDs denoting protein sequences with experimentally validated signal peptide and their corresponding organisms.

| <b>No.</b> | <b>Uniprot ID</b> | <b>Organism</b>                 |
|------------|-------------------|---------------------------------|
| 1          | P01137            | Homo sapiens                    |
| 2          | P15516            | Homo sapiens                    |
| 3          | Q9UBU3            | Homo sapiens                    |
| 4          | Q7M3V1            | Chelonus sp. nr. curvimaculatus |
| 5          | B2BRQ5            | Austrelaps labialis             |
| 6          | P01379            | Laticauda semifasciata          |
| 7          | Q53B53            | Ophiophagus hannah              |
| 8          | P01398            | Bungarus multicinctus           |
| 9          | C6JUP2            | Micrurus corallinus             |
| 10         | P81783            | Bungarus candidus               |
| 11         | P10456            | Laticauda colubrina             |
| 12         | F5CPD3            | Micrurus altirostris            |
| 13         | P22922            | Bombyx mori                     |
| 14         | P01009            | Homo sapiens                    |
| 15         | P05623            | Drosophila melanogaster         |
| 16         | P84888            | Alcaligenes faecalis            |
| 17         | G5EC68            | Caenorhabditis elegans          |
| 18         | Q96X54            | Aspergillus awamori             |
| 19         | P42254            | Aspergillus niger               |
| 20         | P42255            | Aspergillus niger               |
| 21         | P13689            | Zea mays                        |
| 22         | A2CKF7            | Bungarus fasciatus              |
| 23         | P58370            | Micrurus corallinus             |
| 24         | P62376            | Hydrophis cyanocinctus          |
| 25         | F5CPD5            | Micrurus altirostris            |
| 26         | F5CPE4            | Micrurus altirostris            |
| 27         | P10459            | Laticauda laticaudata           |
| 28         | P60770            | Naja atra                       |
| 29         | Q7T2I5            | Laticauda semifasciata          |
| 30         | P60302            | Naja sputatrix                  |
| 31         | P01443            | Naja atra                       |
| 32         | C6JUP1            | Micrurus corallinus             |
| 33         | C6JUP3            | Micrurus corallinus             |
| 34         | P02763            | Homo sapiens                    |
| 35         | Q03044            | Didelphis virginiana            |
| 36         | P12725            | Ovis aries                      |
| 37         | Q63041            | Rattus norvegicus               |
| 38         | P42256            | Aspergillus niger               |
| 39         | P07692            | Torpedo marmorata               |

|    |        |                                   |
|----|--------|-----------------------------------|
| 40 | P12820 | Bos taurus                        |
| 41 | P60616 | Bungarus multicinctus             |
| 42 | P01384 | Notechis scutatus scutatus        |
| 43 | Q53B58 | Ophiophagus hannah                |
| 44 | Q76FP5 | Hypocrea rufa                     |
| 45 | Q8RVH5 | Glycine max                       |
| 46 | Q2KJF1 | Bos taurus                        |
| 47 | P13744 | Cucurbita maxima                  |
| 48 | C1IC49 | Walterinnesia aegyptia            |
| 49 | Q9PW19 | Bungarus multicinctus             |
| 50 | P01412 | Ophiophagus hannah                |
| 51 | Q45Z11 | Oxyuranus scutellatus scutellatus |
| 52 | C1IC47 | Walterinnesia aegyptia            |
| 53 | F5CPD8 | Micrurus altirostris              |
| 54 | Q53B52 | Ophiophagus hannah                |
| 55 | Q8RS40 | Alcaligenes sp.                   |
| 56 | P05408 | Homo sapiens                      |
| 57 | P33487 | Arabidopsis thaliana              |
| 58 | Q9YGI4 | Naja atra                         |
| 59 | P19959 | Aipysurus laevis                  |
| 60 | P10457 | Laticauda colubrina               |
| 61 | C1IC48 | Walterinnesia aegyptia            |
| 62 | P80245 | Naja atra                         |
| 63 | Q69CK0 | Ophiophagus hannah                |
| 64 | P0C554 | Bungarus fasciatus                |
| 65 | P18329 | Dendroaspis angusticeps           |
| 66 | Q9PUB7 | Micrurus corallinus               |
| 67 | P0C552 | Bungarus fasciatus                |
| 68 | F5CPE2 | Micrurus altirostris              |
| 69 | Q53B47 | Ophiophagus hannah                |
| 70 | P04217 | Homo sapiens                      |
| 71 | Q61247 | Mus musculus                      |
| 72 | U6BLZ9 | Penicillium canescens             |
| 73 | Q03383 | Bombyx mori                       |
| 74 | P08001 | Sus scrofa                        |
| 75 | Q8QGR0 | Dendroaspis angusticeps           |
| 76 | P01404 | Dendroaspis angusticeps           |
| 77 | P0C553 | Bungarus fasciatus                |
| 78 | P0DKR6 | Dendroaspis polylepis polylepis   |
| 79 | Q9LCB9 | Vibrio sp.                        |
| 80 | P44569 | Haemophilus influenzae            |
| 81 | P21589 | Homo sapiens                      |
| 82 | P01165 | Sus scrofa                        |

|     |        |                              |
|-----|--------|------------------------------|
| 83  | P13917 | Glycine max                  |
| 84  | P17475 | Rattus norvegicus            |
| 85  | A0P8X0 | Bacillus circulans           |
| 86  | U6A629 | Penicillium canescens        |
| 87  | Q76CA2 | Monoplex parthenopeus        |
| 88  | Q39649 | Cucurbita maxima             |
| 89  | P19594 | Glycine max                  |
| 90  | Q53B59 | Ophiophagus hannah           |
| 91  | O42257 | Naja sputatrix               |
| 92  | P14612 | Pseudechis australis         |
| 93  | Q9W7J5 | Pseudonaja textilis          |
| 94  | Q9YGJ0 | Bungarus multicinctus        |
| 95  | P18328 | Dendroaspis angusticeps      |
| 96  | F5CPE3 | Micrurus altirostris         |
| 97  | P28800 | Bos taurus                   |
| 98  | P08697 | Homo sapiens                 |
| 99  | P01023 | Homo sapiens                 |
| 100 | P04058 | Tetronarce californica       |
| 101 | P61312 | Rattus norvegicus            |
| 102 | P82662 | Ophiophagus hannah           |
| 103 | P23035 | Oryctolagus cuniculus        |
| 104 | P22325 | Cavia porcellus              |
| 105 | P38029 | Equus caballus               |
| 106 | P02750 | Homo sapiens                 |
| 107 | P0C2T2 | Mycobacterium bovis          |
| 108 | E3W9M2 | Dianthus caryophyllus        |
| 109 | P01011 | Homo sapiens                 |
| 110 | Q9LAP7 | Alteromonas agarilytica      |
| 111 | P15450 | Apis mellifera               |
| 112 | Q60994 | Mus musculus                 |
| 113 | Q8I7X1 | Porcellio scaber             |
| 114 | P10968 | Triticum aestivum            |
| 115 | P02876 | Triticum aestivum            |
| 116 | P56526 | Aspergillus niger            |
| 117 | P01364 | Aplysia californica          |
| 118 | Q8LG54 | Arabidopsis thaliana         |
| 119 | P16454 | Yersinia enterocolitica      |
| 120 | P58154 | Lymnaea stagnalis            |
| 121 | P15228 | Mesobuthus martensii         |
| 122 | Q9FXT4 | Oryza sativa subsp. japonica |
| 123 | P11218 | Urtica dioica                |
| 124 | Q9LVC0 | Arabidopsis thaliana         |
| 125 | Q9C5S0 | Arabidopsis thaliana         |

|     |        |                                                 |
|-----|--------|-------------------------------------------------|
| 126 | P19872 | <i>Locusta migratoria</i>                       |
| 127 | Q15848 | <i>Homo sapiens</i>                             |
| 128 | P43652 | <i>Homo sapiens</i>                             |
| 129 | Q9M0S4 | <i>Arabidopsis thaliana</i>                     |
| 130 | Q6Z232 | <i>Oryza sativa</i> subsp. <i>japonica</i>      |
| 131 | P62931 | <i>Pisum sativum</i>                            |
| 132 | P02769 | <i>Bos taurus</i>                               |
| 133 | Q51372 | <i>Pseudomonas aeruginosa</i>                   |
| 134 | Q3C258 | <i>Actinia equina</i>                           |
| 135 | Q3Y5Z3 | <i>Bos taurus</i>                               |
| 136 | P53366 | <i>Sus scrofa</i>                               |
| 137 | P39180 | <i>Escherichia coli</i>                         |
| 138 | Q653V7 | <i>Oryza sativa</i> subsp. <i>japonica</i>      |
| 139 | P19926 | <i>Escherichia coli</i>                         |
| 140 | P02770 | <i>Rattus norvegicus</i>                        |
| 141 | P18895 | <i>Pseudomonas aeruginosa</i>                   |
| 142 | Q9L7P2 | <i>Pseudomonas syringae</i> pv. <i>syringae</i> |
| 143 | Q84V39 | <i>Olea europaea</i>                            |
| 144 | Q99217 | <i>Homo sapiens</i>                             |
| 145 | P49252 | <i>Lens culinaris</i>                           |
| 146 | P80392 | <i>Meleagris gallopavo</i>                      |
| 147 | P24735 | <i>Pseudomonas aeruginosa</i>                   |
| 148 | Q9M6E9 | <i>Abrus precatorius</i>                        |
| 149 | Q9LYF6 | <i>Arabidopsis thaliana</i>                     |
| 150 | Q8TD06 | <i>Homo sapiens</i>                             |
| 151 | P67788 | <i>Manduca sexta</i>                            |
| 152 | Q00855 | <i>Dermatophagoides farinae</i>                 |
| 153 | P80384 | <i>Lepidoglyphus destructor</i>                 |
| 154 | P39049 | <i>Photobacterium</i> sp.                       |
| 155 | P22364 | <i>Paracoccus denitrificans</i>                 |
| 156 | P00811 | <i>Escherichia coli</i>                         |
| 157 | P25718 | <i>Escherichia coli</i>                         |
| 158 | Q01117 | <i>Lipomyces kononenkoae</i>                    |
| 159 | P19584 | <i>Thermoanaerobacterium thermosulfurigenes</i> |
| 160 | P16860 | <i>Homo sapiens</i>                             |
| 161 | P80961 | <i>Myoxocephalus octodecemspinosus</i>          |
| 162 | P28351 | <i>Aspergillus niger</i>                        |
| 163 | P29064 | <i>Candida tsukubaensis</i>                     |
| 164 | Q9C0Y4 | <i>Schizosaccharomyces pombe</i>                |
| 165 | Q9STQ3 | <i>Arabidopsis thaliana</i>                     |
| 166 | Q9SJY7 | <i>Arabidopsis thaliana</i>                     |
| 167 | O95994 | <i>Homo sapiens</i>                             |

|     |        |                                |
|-----|--------|--------------------------------|
| 168 | Q90WJ8 | Anguilla japonica              |
| 169 | Q06749 | Pseudomonas aeruginosa         |
| 170 | P0AD70 | Escherichia coli               |
| 171 | P01019 | Homo sapiens                   |
| 172 | P15358 | Haementeria officinalis        |
| 173 | Q9LJD9 | Arabidopsis thaliana           |
| 174 | O82337 | Arabidopsis thaliana           |
| 175 | Q9ZT16 | Arabidopsis thaliana           |
| 176 | P08379 | Locusta migratoria             |
| 177 | P02760 | Homo sapiens                   |
| 178 | O05465 | Psychrobacter immobilis        |
| 179 | P19571 | Bacillus sp.                   |
| 180 | P29957 | Pseudoalteromonas haloplanktis |
| 181 | P13204 | Bos taurus                     |
| 182 | P10152 | Bos taurus                     |
| 183 | Q9Y5C1 | Homo sapiens                   |
| 184 | P01015 | Rattus norvegicus              |
| 185 | A9UGV6 | Oryza sativa subsp. japonica   |
| 186 | P02648 | Canis lupus familiaris         |
| 187 | P19034 | Bos taurus                     |
| 188 | P02656 | Homo sapiens                   |
| 189 | P07712 | Aplysia californica            |
| 190 | P22327 | Trichoplusia ni                |
| 191 | P55319 | Locusta migratoria             |
| 192 | P35807 | Schistocerca nitens            |
| 193 | P62928 | Pisum sativum                  |
| 194 | P19121 | Gallus gallus                  |
| 195 | Q84ZX5 | Artemisia vulgaris             |
| 196 | P49278 | Dermatophagoides pteronyssinus |
| 197 | P35859 | Rattus norvegicus              |
| 198 | P22952 | Sus scrofa                     |
| 199 | Q5I2B2 | Amaranthus retroflexus         |
| 200 | P24259 | Sus scrofa                     |
| 201 | Q7Z1K3 | Anisakis simplex               |
| 202 | Q9V496 | Drosophila melanogaster        |
| 203 | P02652 | Homo sapiens                   |
| 204 | P06727 | Homo sapiens                   |
| 205 | P02655 | Homo sapiens                   |
| 206 | P95470 | Cellvibrio japonicus           |
| 207 | P18829 | Schistocerca gregaria          |
| 208 | P61855 | Drosophila melanogaster        |
| 209 | Q965E2 | Psoroptes ovis                 |
| 210 | P35858 | Homo sapiens                   |

|     |        |                                |
|-----|--------|--------------------------------|
| 211 | P04172 | Methylobacterium extorquens    |
| 212 | P02817 | Bos taurus                     |
| 213 | P49250 | Enterobacter aerogenes         |
| 214 | P19531 | Geobacillus stearothermophilus |
| 215 | P00692 | Bacillus amyloliquefaciens     |
| 216 | P06278 | Bacillus licheniformis         |
| 217 | P06279 | Geobacillus stearothermophilus |
| 218 | Q05884 | Streptomyces lividans          |
| 219 | P07634 | Sus scrofa                     |
| 220 | P03950 | Homo sapiens                   |
| 221 | P04002 | Pseudopleuronectes americanus  |
| 222 | P9WIR7 | Mycobacterium tuberculosis     |
| 223 | Q9U943 | Locusta migratoria             |
| 224 | P02647 | Homo sapiens                   |
| 225 | P18659 | Macaca fascicularis            |
| 226 | P19329 | Phaseolus vulgaris             |
| 227 | Q59639 | Pseudomonas alginovora         |
| 228 | P46883 | Escherichia coli               |
| 229 | P80391 | Meleagris gallopavo            |
| 230 | P25403 | Mirabilis jalapa               |
| 231 | P27275 | Amaranthus caudatus            |
| 232 | Q6UX39 | Homo sapiens                   |
| 233 | P0C1B3 | Aspergillus oryzae             |
| 234 | Q99013 | Pseudopleuronectes americanus  |
| 235 | Q03352 | Gallus gallus                  |
| 236 | P19400 | Ascaris suum                   |
| 237 | P19035 | Bos taurus                     |
| 238 | P05090 | Homo sapiens                   |
| 239 | P17690 | Bos taurus                     |
| 240 | P02749 | Homo sapiens                   |
| 241 | P02659 | Gallus gallus                  |
| 242 | Q59478 | Klebsiella pneumoniae          |
| 243 | Q28989 | Sus scrofa                     |
| 244 | P22365 | Paracoccus versutus            |
| 245 | P80915 | Macadamia integrifolia         |
| 246 | P83880 | Pinus monticola                |
| 247 | P25404 | Mirabilis jalapa               |
| 248 | O43827 | Homo sapiens                   |
| 249 | P41361 | Bos taurus                     |
| 250 | P01008 | Homo sapiens                   |
| 251 | A9UGV7 | Oryza sativa subsp. japonica   |
| 252 | Q59544 | Morganella morganii            |
| 253 | P14630 | Rattus norvegicus              |

|     |        |                                                   |
|-----|--------|---------------------------------------------------|
| 254 | Q03472 | <i>Sus scrofa</i>                                 |
| 255 | Q5XM24 | <i>Dictyostelium discoideum</i>                   |
| 256 | P16950 | <i>Thermoanaerobacter thermohydrosulfuricus</i>   |
| 257 | P13205 | <i>Rattus norvegicus</i>                          |
| 258 | P01161 | <i>Rattus norvegicus</i>                          |
| 259 | P07457 | <i>Zoarces americanus</i>                         |
| 260 | B1P0S1 | <i>Pseudopleuronectes americanus</i>              |
| 261 | A9UGV5 | <i>Oryza sativa</i> subsp. <i>japonica</i>        |
| 262 | P0AE22 | <i>Escherichia coli</i>                           |
| 263 | Q540U1 | <i>Salmonella typhimurium</i>                     |
| 264 | Q17043 | <i>Aplysia kurodai</i>                            |
| 265 | P04639 | <i>Rattus norvegicus</i>                          |
| 266 | P18658 | <i>Macaca fascicularis</i>                        |
| 267 | P02649 | <i>Homo sapiens</i>                               |
| 268 | E0D877 | <i>Aedes albopictus</i>                           |
| 269 | P09551 | <i>Escherichia coli</i>                           |
| 270 | P19801 | <i>Homo sapiens</i>                               |
| 271 | P18657 | <i>Macaca fascicularis</i>                        |
| 272 | P56595 | <i>Canis lupus familiaris</i>                     |
| 273 | P02654 | <i>Homo sapiens</i>                               |
| 274 | O14791 | <i>Homo sapiens</i>                               |
| 275 | P80561 | <i>Streptomyces griseus</i> subsp. <i>griseus</i> |
| 276 | P45091 | <i>Haemophilus influenzae</i>                     |
| 277 | P09465 | <i>Cricetus cricetus</i>                          |
| 278 | P10762 | <i>Locusta migratoria</i>                         |
| 279 | P15497 | <i>Bos taurus</i>                                 |
| 280 | O96559 | <i>Cimex lectularius</i>                          |
| 281 | P02924 | <i>Escherichia coli</i>                           |
| 282 | P36560 | <i>Escherichia coli</i>                           |
| 283 | I0J1I6 | <i>Pseudomonas taetrolens</i>                     |
| 284 | Q00901 | <i>Clostridium botulinum</i> C phage              |
| 285 | P15879 | <i>Clostridium botulinum</i> D phage              |
| 286 | Q5GQ85 | <i>Argas reflexus</i>                             |
| 287 | Q8MMH3 | <i>Pimpla hypochondriaca</i>                      |
| 288 | P83886 | <i>Allium sativum</i>                             |
| 289 | Q64HC7 | <i>Armadillidium vulgare</i>                      |
| 290 | P24792 | <i>Cucurbita maxima</i>                           |
| 291 | P00805 | <i>Escherichia coli</i>                           |
| 292 | P0CX77 | <i>Saccharomyces cerevisiae</i>                   |
| 293 | P30859 | <i>Escherichia coli</i>                           |
| 294 | P30860 | <i>Escherichia coli</i>                           |
| 295 | P17953 | <i>Enterococcus faecalis</i>                      |

|     |        |                                            |
|-----|--------|--------------------------------------------|
| 296 | P14133 | <i>Cucumis sativus</i>                     |
| 297 | P43843 | <i>Haemophilus influenzae</i>              |
| 298 | Q47898 | <i>Elizabethkingia miricola</i>            |
| 299 | P20933 | <i>Homo sapiens</i>                        |
| 300 | P30919 | <i>Rattus norvegicus</i>                   |
| 301 | P15289 | <i>Homo sapiens</i>                        |
| 302 | P20713 | <i>Enterobacter aerogenes</i>              |
| 303 | O96910 | <i>Aplysia californica</i>                 |
| 304 | P01551 | <i>Streptomyces globisporus</i>            |
| 305 | P04377 | <i>Alcaligenes faecalis</i>                |
| 306 | P00280 | <i>Achromobacter denitrificans</i>         |
| 307 | P0A321 | <i>Bordetella bronchiseptica</i>           |
| 308 | P01887 | <i>Mus musculus</i>                        |
| 309 | P80401 | <i>Paracoccus pantotrophus</i>             |
| 310 | P12334 | <i>Methylomonas</i> sp.                    |
| 311 | P07151 | <i>Rattus norvegicus</i>                   |
| 312 | P02701 | <i>Gallus gallus</i>                       |
| 313 | Q52VH2 | <i>Sphingosinicella xenopeptidolytica</i>  |
| 314 | P48982 | <i>Xanthomonas manihoti</i>                |
| 315 | Q15582 | <i>Homo sapiens</i>                        |
| 316 | D4A540 | <i>Rattus norvegicus</i>                   |
| 317 | P80356 | <i>Avena sativa</i>                        |
| 318 | P19567 | <i>Achromobacter cycloclastes</i>          |
| 319 | P04171 | <i>Methylobacterium extorquens</i>         |
| 320 | Q9F646 | <i>Pseudomonas putida</i>                  |
| 321 | Q44856 | <i>Brevibacillus choshinensis</i>          |
| 322 | Q2A783 | <i>Triticum aestivum</i>                   |
| 323 | Q10NX8 | <i>Oryza sativa</i> subsp. <i>japonica</i> |
| 324 | O11780 | <i>Sus scrofa</i>                          |
| 325 | Q9SR37 | <i>Arabidopsis thaliana</i>                |
| 326 | Q5AMT2 | <i>Candida albicans</i>                    |
| 327 | P28585 | <i>Escherichia coli</i>                    |
| 328 | P13661 | <i>Escherichia coli</i>                    |
| 329 | A3RF67 | <i>Dalbergia nigrescens</i>                |
| 330 | Q9LRC8 | <i>Scutellaria baicalensis</i>             |
| 331 | P27951 | <i>Streptococcus agalactiae</i>            |
| 332 | P22390 | <i>Citrobacter koseri</i>                  |
| 333 | P52663 | <i>Enterobacter cloacae</i>                |
| 334 | Q5W280 | <i>Bombina orientalis</i>                  |
| 335 | P27919 | <i>Avena sativa</i>                        |
| 336 | P26776 | <i>Sus scrofa</i>                          |
| 337 | P00282 | <i>Pseudomonas aeruginosa</i>              |
| 338 | P81549 | <i>Bordetella pertussis</i>                |



|     |        |                                |
|-----|--------|--------------------------------|
| 339 | P04190 | Bacillus cereus                |
| 340 | P62593 | Escherichia coli               |
| 341 | P01888 | Bos taurus                     |
| 342 | P21611 | Gallus gallus                  |
| 343 | P61769 | Homo sapiens                   |
| 344 | P15703 | Saccharomyces cerevisiae       |
| 345 | Q44642 | Brucella abortus               |
| 346 | P17213 | Homo sapiens                   |
| 347 | P26729 | Bombyx mori                    |
| 348 | P26730 | Bombyx mori                    |
| 349 | P15926 | Streptococcus pyogenes         |
| 350 | P10425 | Bacillus sp.                   |
| 351 | P0A9Z7 | Escherichia coli               |
| 352 | Q86WA6 | Homo sapiens                   |
| 353 | P37028 | Escherichia coli               |
| 354 | P02746 | Homo sapiens                   |
| 355 | P02747 | Homo sapiens                   |
| 356 | Q23997 | Drosophila melanogaster        |
| 357 | P24037 | Pseudomonas stutzeri           |
| 358 | P08236 | Homo sapiens                   |
| 359 | O08498 | Elizabethkingia meningoseptica |
| 360 | P39824 | Bacillus subtilis              |
| 361 | P52682 | Serratia marcescens            |
| 362 | P0A1V8 | Salmonella typhimurium         |
| 363 | P21175 | Pseudomonas aeruginosa         |
| 364 | P26732 | Bombyx mori                    |
| 365 | P00736 | Homo sapiens                   |
| 366 | P41547 | Canis lupus familiaris         |
| 367 | P18418 | Rattus norvegicus              |
| 368 | P52699 | Serratia marcescens            |
| 369 | P31722 | Rattus norvegicus              |
| 370 | D5QVH0 | Methylosinus trichosporium     |
| 371 | P52193 | Bos taurus                     |
| 372 | Q16568 | Homo sapiens                   |
| 373 | P10424 | Bacillus cereus                |
| 374 | P23954 | Klebsiella oxytoca             |
| 375 | Q8N4F0 | Homo sapiens                   |
| 376 | Q45340 | Bordetella pertussis           |
| 377 | Q9LXD6 | Arabidopsis thaliana           |
| 378 | P04369 | Methylococcus capsulatus       |
| 379 | P00150 | Rhodopseudomonas palustris     |
| 380 | P20507 | Chlamydomonas reinhardtii      |
| 381 | P27797 | Homo sapiens                   |

|     |        |                              |
|-----|--------|------------------------------|
| 382 | P02668 | Bos taurus                   |
| 383 | P07221 | Oryctolagus cuniculus        |
| 384 | P25796 | Cavia porcellus              |
| 385 | P31720 | Rattus norvegicus            |
| 386 | Q9BXI9 | Homo sapiens                 |
| 387 | P0ABE7 | Escherichia coli             |
| 388 | P22748 | Homo sapiens                 |
| 389 | P15253 | Oryctolagus cuniculus        |
| 390 | P82187 | Equus caballus               |
| 391 | P06797 | Mus musculus                 |
| 392 | P56202 | Homo sapiens                 |
| 393 | Q9ZT64 | Pinus contorta               |
| 394 | P09954 | Sus scrofa                   |
| 395 | Q09117 | Populus deltoides            |
| 396 | Q64277 | Mus musculus                 |
| 397 | P40881 | Methanosarcina thermophila   |
| 398 | O43852 | Homo sapiens                 |
| 399 | P10562 | Canavalia gladiata           |
| 400 | P31231 | Pelophylax esculentus        |
| 401 | P51868 | Rattus norvegicus            |
| 402 | P08185 | Homo sapiens                 |
| 403 | Q4V4I9 | Drosophila melanogaster      |
| 404 | O15467 | Homo sapiens                 |
| 405 | Q9Y4X3 | Homo sapiens                 |
| 406 | P80098 | Homo sapiens                 |
| 407 | P02745 | Homo sapiens                 |
| 408 | Q9BXJ3 | Homo sapiens                 |
| 409 | P04003 | Homo sapiens                 |
| 410 | P18761 | Mus musculus                 |
| 411 | P20160 | Homo sapiens                 |
| 412 | P07267 | Saccharomyces cerevisiae     |
| 413 | O42720 | Ajellomyces capsulatus       |
| 414 | Q6QD51 | Rattus norvegicus            |
| 415 | Q16627 | Homo sapiens                 |
| 416 | P13501 | Homo sapiens                 |
| 417 | P14532 | Pseudomonas aeruginosa       |
| 418 | P59807 | Proteus vulgaris             |
| 419 | P24258 | Chlamydomonas reinhardtii    |
| 420 | Q9SLY8 | Oryza sativa subsp. japonica |
| 421 | P28491 | Sus scrofa                   |
| 422 | Q26636 | Sarcophaga peregrina         |
| 423 | P31211 | Rattus norvegicus            |
| 424 | Q6UW01 | Homo sapiens                 |

|     |        |                                             |
|-----|--------|---------------------------------------------|
| 425 | Q99616 | Homo sapiens                                |
| 426 | O00175 | Homo sapiens                                |
| 427 | P10147 | Homo sapiens                                |
| 428 | P18181 | Mus musculus                                |
| 429 | P13987 | Homo sapiens                                |
| 430 | P15156 | Mesocricetus auratus                        |
| 431 | O09165 | Mus musculus                                |
| 432 | P19204 | Gallus gallus                               |
| 433 | P14091 | Homo sapiens                                |
| 434 | Q8J0D2 | Geotrichum sp.                              |
| 435 | Q9NTU7 | Homo sapiens                                |
| 436 | P00733 | Streptomyces albus G                        |
| 437 | Q8SXL2 | Drosophila melanogaster                     |
| 438 | P55774 | Homo sapiens                                |
| 439 | O89093 | Mus musculus                                |
| 440 | O00585 | Homo sapiens                                |
| 441 | P55929 | Nitrosomonas europaea                       |
| 442 | P31358 | Homo sapiens                                |
| 443 | O77541 | Oryctolagus cuniculus                       |
| 444 | P30921 | Bacillus sp.                                |
| 445 | P09121 | Bacillus sp.                                |
| 446 | P31797 | Geobacillus stearothermophilus              |
| 447 | P26827 | Thermoanaerobacterium<br>thermosulfurigenes |
| 448 | P40199 | Homo sapiens                                |
| 449 | Q61400 | Mus musculus                                |
| 450 | Q9Y0Y0 | Aedes albopictus                            |
| 451 | P83403 | Glossina morsitans morsitans                |
| 452 | P80067 | Rattus norvegicus                           |
| 453 | Q800A0 | Lithobates catesbeiana                      |
| 454 | Q9I589 | Pseudomonas aeruginosa                      |
| 455 | P14384 | Homo sapiens                                |
| 456 | Q39962 | Hevea brasiliensis                          |
| 457 | O00626 | Homo sapiens                                |
| 458 | P13500 | Homo sapiens                                |
| 459 | P10855 | Mus musculus                                |
| 460 | O62680 | Sus scrofa                                  |
| 461 | P31835 | Paenibacillus macerans                      |
| 462 | P12637 | Canis lupus familiaris                      |
| 463 | P31235 | Oryctolagus cuniculus                       |
| 464 | P53634 | Homo sapiens                                |
| 465 | Q805F3 | Xenopus laevis                              |
| 466 | P07154 | Rattus norvegicus                           |

|     |        |                                  |
|-----|--------|----------------------------------|
| 467 | A6P6V9 | Cannabis sativa                  |
| 468 | P00730 | Bos taurus                       |
| 469 | P15085 | Homo sapiens                     |
| 470 | P15169 | Homo sapiens                     |
| 471 | Q92583 | Homo sapiens                     |
| 472 | P22362 | Homo sapiens                     |
| 473 | P78556 | Homo sapiens                     |
| 474 | P50229 | Rattus norvegicus                |
| 475 | Q47910 | Myroides odoratus                |
| 476 | P43379 | Bacillus circulans               |
| 477 | P31746 | Bacillus sp.                     |
| 478 | Q14002 | Homo sapiens                     |
| 479 | P82290 | Anopheles gambiae                |
| 480 | Q9XZH0 | Spodoptera litura                |
| 481 | O95813 | Homo sapiens                     |
| 482 | Q06153 | Ophiostoma ulmi                  |
| 483 | P43478 | Pseudoalteromonas carrageenovora |
| 484 | P08818 | Hordeum vulgare                  |
| 485 | Q16663 | Homo sapiens                     |
| 486 | P55773 | Homo sapiens                     |
| 487 | O13547 | Saccharomyces cerevisiae         |
| 488 | P81417 | Aedes albopictus                 |
| 489 | Q28085 | Bos taurus                       |
| 490 | P08603 | Homo sapiens                     |
| 491 | P36222 | Homo sapiens                     |
| 492 | Q25589 | Orconectes limosus               |
| 493 | P29026 | Rhizopus oligosporus             |
| 494 | P24091 | Nicotiana tabacum                |
| 495 | Q91XA9 | Mus musculus                     |
| 496 | P80325 | Cavia porcellus                  |
| 497 | P97884 | Rattus norvegicus                |
| 498 | Q9Y258 | Homo sapiens                     |
| 499 | P27274 | Rattus norvegicus                |
| 500 | P17692 | Bacillus sp.                     |
| 501 | P10477 | Clostridium thermocellum         |
| 502 | Q8VCT4 | Mus musculus                     |
| 503 | A2TJI4 | Escherichia coli                 |
| 504 | Q05JY7 | Pseudoalteromonas sp.            |
| 505 | P30922 | Bos taurus                       |
| 506 | Q8SPQ0 | Capra hircus                     |
| 507 | P0CB51 | Coccidioides posadasii           |
| 508 | P07254 | Serratia marcescens              |
| 509 | Q05538 | Solanum lycopersicum             |

|     |        |                             |
|-----|--------|-----------------------------|
| 510 | O07921 | Bacillus subtilis           |
| 511 | P11220 | Streptomyces plicatus       |
| 512 | P01555 | Vibrio cholerae serotype O1 |
| 513 | Q12127 | Saccharomyces cerevisiae    |
| 514 | Q8N6Q3 | Homo sapiens                |
| 515 | P24807 | Mus musculus                |
| 516 | O43866 | Homo sapiens                |
| 517 | Q9Y0X9 | Aedes albopictus            |
| 518 | P0DN86 | Homo sapiens                |
| 519 | P21226 | Pisum sativum               |
| 520 | P32823 | Pseudoalteromonas piscicida |
| 521 | Q9FRV1 | Secale cereale              |
| 522 | Q9FRV0 | Secale cereale              |
| 523 | P14529 | Saccharopolyspora erythraea |
| 524 | P42517 | Enterobacter agglomerans    |
| 525 | Q93LJ4 | Salmonella typhimurium      |
| 526 | Q9HU05 | Pseudomonas aeruginosa      |
| 527 | P00773 | Rattus norvegicus           |
| 528 | P00450 | Homo sapiens                |
| 529 | P16303 | Rattus norvegicus           |
| 530 | Q27081 | Tachypleus tridentatus      |
| 531 | P17315 | Escherichia coli            |
| 532 | Q9Y240 | Homo sapiens                |
| 533 | P82592 | Aedes aegypti               |
| 534 | P0C2S1 | Clostridium thermocellum    |
| 535 | P30122 | Bos taurus                  |
| 536 | P19835 | Homo sapiens                |
| 537 | Q8WUJ3 | Homo sapiens                |
| 538 | Q556R7 | Dictyostelium discoideum    |
| 539 | P00751 | Homo sapiens                |
| 540 | Q29411 | Sus scrofa                  |
| 541 | P14944 | Carcinus maenas             |
| 542 | Q95M17 | Bos taurus                  |
| 543 | O35744 | Mus musculus                |
| 544 | Q9KK91 | Vibrio furnissii            |
| 545 | Q9SLP4 | Tulipa bakeri               |
| 546 | Q9F437 | Ideonella dechloratans      |
| 547 | P29027 | Rhizopus oligosporus        |
| 548 | P29060 | Nicotiana tabacum           |
| 549 | P27050 | Bacillus circulans          |
| 550 | P96156 | Vibrio furnissii            |
| 551 | P06215 | Phaseolus vulgaris          |
| 552 | Q9U3Z3 | Conus betulinus             |

|     |        |                                 |
|-----|--------|---------------------------------|
| 553 | Q7YZS9 | Conus virgo                     |
| 554 | A6QIG7 | Staphylococcus aureus           |
| 555 | P33665 | Streptomyces sp.                |
| 556 | P00794 | Bos taurus                      |
| 557 | O75596 | Homo sapiens                    |
| 558 | P05371 | Rattus norvegicus               |
| 559 | P10354 | Rattus norvegicus               |
| 560 | Q02246 | Homo sapiens                    |
| 561 | P06681 | Homo sapiens                    |
| 562 | P12024 | Drosophila melanogaster         |
| 563 | Q25154 | Homarus americanus              |
| 564 | Q13231 | Homo sapiens                    |
| 565 | Q06851 | Clostridium thermocellum        |
| 566 | P16619 | Homo sapiens                    |
| 567 | P02681 | Tachypleus tridentatus          |
| 568 | P29029 | Saccharomyces cerevisiae        |
| 569 | P06276 | Homo sapiens                    |
| 570 | P23472 | Hevea brasiliensis              |
| 571 | P01556 | Vibrio cholerae serotype O1     |
| 572 | Q9N2D2 | Callithrix jacchus              |
| 573 | P47001 | Saccharomyces cerevisiae        |
| 574 | P05059 | Bos taurus                      |
| 575 | P22063 | Rattus norvegicus               |
| 576 | P02466 | Rattus norvegicus               |
| 577 | P12387 | Cavia porcellus                 |
| 578 | P01027 | Mus musculus                    |
| 579 | P02703 | Sus scrofa                      |
| 580 | Q6UWK7 | Homo sapiens                    |
| 581 | P03998 | Limulus polyphemus              |
| 582 | Q6PSU2 | Arachis hypogaea                |
| 583 | Q58AD3 | Cupriavidus metallidurans       |
| 584 | Q5DW47 | Apis mellifera                  |
| 585 | P17697 | Bos taurus                      |
| 586 | P12375 | Pseudomonas syringae pv. tomato |
| 587 | P12376 | Pseudomonas syringae pv. tomato |
| 588 | Q9GSA4 | Galleria mellonella             |
| 589 | P10909 | Homo sapiens                    |
| 590 | P10645 | Homo sapiens                    |
| 591 | P01024 | Homo sapiens                    |
| 592 | P02462 | Homo sapiens                    |
| 593 | Q07092 | Homo sapiens                    |
| 594 | Q6UWE3 | Homo sapiens                    |
| 595 | Q00945 | Lymnaea stagnalis               |

|     |        |                                       |
|-----|--------|---------------------------------------|
| 596 | Q26377 | <i>Drosophila melanogaster</i>        |
| 597 | Q8T0Y7 | <i>Aplysia californica</i>            |
| 598 | Q6UXH1 | <i>Homo sapiens</i>                   |
| 599 | P13671 | <i>Homo sapiens</i>                   |
| 600 | P08125 | <i>Gallus gallus</i>                  |
| 601 | P01189 | <i>Homo sapiens</i>                   |
| 602 | P42889 | <i>Myocastor coypus</i>               |
| 603 | P02866 | <i>Canavalia ensiformis</i>           |
| 604 | P23805 | <i>Bos taurus</i>                     |
| 605 | Q8GFE2 | <i>Desulfitobacterium hafniense</i>   |
| 606 | Q6WN34 | <i>Homo sapiens</i>                   |
| 607 | P02741 | <i>Homo sapiens</i>                   |
| 608 | Q07203 | <i>Xenopus laevis</i>                 |
| 609 | P21837 | <i>Dictyostelium discoideum</i>       |
| 610 | P54507 | <i>Bacillus subtilis</i>              |
| 611 | Q96318 | <i>Arabidopsis thaliana</i>           |
| 612 | F8S0Y4 | <i>Crotalus adamanteus</i>            |
| 613 | P52753 | <i>Cryphonectria parasitica</i>       |
| 614 | P0A1E7 | <i>Salmonella enteritidis</i>         |
| 615 | P27373 | <i>Methanothermus fervidus</i>        |
| 616 | Q50833 | <i>Methanococcus voltae</i>           |
| 617 | P0DML2 | <i>Homo sapiens</i>                   |
| 618 | P13611 | <i>Homo sapiens</i>                   |
| 619 | P08331 | <i>Escherichia coli</i>               |
| 620 | P84805 | <i>Naja kaouthia</i>                  |
| 621 | Q7ZT98 | <i>Ophiophagus hannah</i>             |
| 622 | Q875I9 | <i>Neosartorya fumigata</i>           |
| 623 | P47796 | <i>Gadus morhua</i>                   |
| 624 | A7L035 | <i>Chironex fleckeri</i>              |
| 625 | Q6UX52 | <i>Homo sapiens</i>                   |
| 626 | O75629 | <i>Homo sapiens</i>                   |
| 627 | Q60477 | <i>Cavia porcellus</i>                |
| 628 | P06205 | <i>Limulus polyphemus</i>             |
| 629 | Q8JI39 | <i>Protobothrops flavoviridis</i>     |
| 630 | Q8JGT9 | <i>Rhabdophis tigrinus tigrinus</i>   |
| 631 | P85197 | <i>Lonomia obliqua</i>                |
| 632 | P45590 | <i>Hyalophora cecropia</i>            |
| 633 | O95715 | <i>Homo sapiens</i>                   |
| 634 | P09787 | <i>Pseudomonas putida</i>             |
| 635 | P74917 | <i>Acidithiobacillus ferrooxidans</i> |
| 636 | P15452 | <i>Hydrogenobacter thermophilus</i>   |
| 637 | P00120 | <i>Desulfovibrio vulgaris</i>         |
| 638 | W1I921 | <i>Achatina achatina</i>              |

|     |        |                               |
|-----|--------|-------------------------------|
| 639 | P54107 | Homo sapiens                  |
| 640 | O75462 | Homo sapiens                  |
| 641 | P02742 | Oryctolagus cuniculus         |
| 642 | Q9ZWA9 | Arabidopsis thaliana          |
| 643 | Q7ZZN8 | Naja atra                     |
| 644 | Q58232 | Methanocaldococcus jannaschii |
| 645 | P0ABW7 | Escherichia coli              |
| 646 | Q08738 | Bombyx mori                   |
| 647 | P77214 | Escherichia coli              |
| 648 | Q8T0W5 | Pimpla hypochondriaca         |
| 649 | Q8T0W0 | Pimpla hypochondriaca         |
| 650 | Q10746 | Rattus norvegicus             |
| 651 | P50228 | Mus musculus                  |
| 652 | P00131 | Desulfovibrio vulgaris        |
| 653 | O33731 | Shewanella frigidimarina      |
| 654 | P00106 | Pseudomonas aeruginosa        |
| 655 | Q91055 | Heloderma horridum horridum   |
| 656 | Q9H4G1 | Homo sapiens                  |
| 657 | P81761 | Mesobuthus tamulus            |
| 658 | Q8T635 | Manduca sexta                 |
| 659 | P19667 | Molineria latifolia           |
| 660 | P43497 | Saccharomyces cerevisiae      |
| 661 | P02775 | Homo sapiens                  |
| 662 | P24059 | Bradyrhizobium diazoefficiens |
| 663 | P04032 | Desulfovibrio vulgaris        |
| 664 | P00091 | Rhodopseudomonas palustris    |
| 665 | P06206 | Limulus polyphemus            |
| 666 | Q7T1K6 | Naja atra                     |
| 667 | P08796 | Dictyostelium discoideum      |
| 668 | P28307 | Escherichia coli              |
| 669 | Q86IV5 | Dictyostelium discoideum      |
| 670 | P83400 | Mesobuthus tamulus            |
| 671 | P80686 | Tenebrio molitor              |
| 672 | Q8T0W2 | Pimpla hypochondriaca         |
| 673 | P69770 | Conus marmoreus               |
| 674 | P19876 | Homo sapiens                  |
| 675 | P80162 | Homo sapiens                  |
| 676 | P02778 | Homo sapiens                  |
| 677 | P00101 | Pseudomonas stutzeri          |
| 678 | O25825 | Helicobacter pylori           |
| 679 | Q06529 | Allochromatium vinosum        |
| 680 | P01037 | Homo sapiens                  |
| 681 | P01036 | Homo sapiens                  |



|     |        |                                          |
|-----|--------|------------------------------------------|
| 682 | Q6T6T4 | <i>Bitis gabonica</i>                    |
| 683 | P47178 | <i>Saccharomyces cerevisiae</i>          |
| 684 | P30348 | <i>Rattus norvegicus</i>                 |
| 685 | P42830 | <i>Homo sapiens</i>                      |
| 686 | Q07325 | <i>Homo sapiens</i>                      |
| 687 | O55038 | <i>Mus musculus</i>                      |
| 688 | P00099 | <i>Pseudomonas aeruginosa</i>            |
| 689 | P94691 | <i>Desulfovibrio africanus</i>           |
| 690 | P46445 | <i>Synechocystis</i> sp.                 |
| 691 | P00154 | <i>Allochromatium vinosum</i>            |
| 692 | P52013 | <i>Caenorhabditis elegans</i>            |
| 693 | P19313 | <i>Rattus norvegicus</i>                 |
| 694 | P35481 | <i>Cyprinus carpio</i>                   |
| 695 | P81534 | <i>Homo sapiens</i>                      |
| 696 | P0AEB2 | <i>Escherichia coli</i>                  |
| 697 | B8AL97 | <i>Oryza sativa</i> subsp. <i>indica</i> |
| 698 | Q6F495 | <i>Molineria latifolia</i>               |
| 699 | P10889 | <i>Mus musculus</i>                      |
| 700 | P80221 | <i>Bos taurus</i>                        |
| 701 | O14625 | <i>Homo sapiens</i>                      |
| 702 | P00096 | <i>Paracoccus denitrificans</i>          |
| 703 | P40136 | <i>Bacillus anthracis</i>                |
| 704 | P00094 | <i>Rhodobacter capsulatus</i>            |
| 705 | Q6TPK4 | <i>Actinidia deliciosa</i>               |
| 706 | P08750 | <i>Bacillus subtilis</i>                 |
| 707 | P24228 | <i>Escherichia coli</i>                  |
| 708 | P39844 | <i>Bacillus subtilis</i>                 |
| 709 | P84908 | <i>Streptomyces mobaraensis</i>          |
| 710 | A7L036 | <i>Chironex fleckeri</i>                 |
| 711 | Q9UAD0 | <i>Mesobuthus martensii</i>              |
| 712 | Q02113 | <i>Bacillus subtilis</i>                 |
| 713 | P28319 | <i>Saccharomyces cerevisiae</i>          |
| 714 | P00083 | <i>Blastochloris viridis</i>             |
| 715 | P07497 | <i>Synechococcus</i> sp.                 |
| 716 | Q9RQB9 | <i>Methylophilus methylotrophus</i>      |
| 717 | P00144 | <i>Rhodospirillum rubrum</i>             |
| 718 | P01034 | <i>Homo sapiens</i>                      |
| 719 | Q98967 | <i>Oncorhynchus keta</i>                 |
| 720 | Q6F3I7 | <i>Pseudoxanthomonas mexicana</i>        |
| 721 | V5YM14 | <i>Pseudoxanthomonas mexicana</i>        |
| 722 | P07625 | <i>Roseobacter denitrificans</i>         |
| 723 | Q5SME3 | <i>Thermus thermophilus</i>              |
| 724 | Q3J164 | <i>Rhodobacter sphaeroides</i>           |

|     |        |                                               |
|-----|--------|-----------------------------------------------|
| 725 | P00082 | <i>Rhodomicrobium vannielii</i>               |
| 726 | P00132 | <i>Desulfovibrio vulgaris</i>                 |
| 727 | P81894 | <i>Geobacter metallireducens</i>              |
| 728 | P28325 | <i>Homo sapiens</i>                           |
| 729 | P09228 | <i>Homo sapiens</i>                           |
| 730 | P39045 | <i>Actinomadura</i> sp.                       |
| 731 | P39042 | <i>Streptomyces</i> sp.                       |
| 732 | P81605 | <i>Homo sapiens</i>                           |
| 733 | Q8GPG1 | <i>Rhodovulum sulfidophilum</i>               |
| 734 | Q727P6 | <i>Desulfovibrio vulgaris</i>                 |
| 735 | P43302 | <i>Azotobacter vinelandii</i>                 |
| 736 | P00149 | <i>Rhodopseudomonas palustris</i>             |
| 737 | P00148 | <i>Rhodobacter sphaeroides</i>                |
| 738 | P01038 | <i>Gallus gallus</i>                          |
| 739 | P08506 | <i>Escherichia coli</i>                       |
| 740 | O07834 | <i>Pseudoxanthomonas mexicana</i>             |
| 741 | Q9H1M4 | <i>Homo sapiens</i>                           |
| 742 | Q6GU94 | <i>Centruroides limpidus limpidus</i>         |
| 743 | Q8GTM0 | <i>Nicotiana glauca</i>                       |
| 744 | P16700 | <i>Escherichia coli</i>                       |
| 745 | P08174 | <i>Homo sapiens</i>                           |
| 746 | Q99PX1 | <i>Vibrio alginolyticus</i>                   |
| 747 | P85213 | <i>Galleria mellonella</i>                    |
| 748 | Q8H6Q0 | <i>Petunia hybrida</i>                        |
| 749 | B3F051 | <i>Lens culinaris</i> subsp. <i>culinaris</i> |
| 750 | Q43413 | <i>Capsicum annuum</i>                        |
| 751 | P30230 | <i>Raphanus sativus</i>                       |
| 752 | P0C0V0 | <i>Escherichia coli</i>                       |
| 753 | P39653 | <i>Streptococcus downei</i>                   |
| 754 | P46168 | <i>Bos taurus</i>                             |
| 755 | P46169 | <i>Bos taurus</i>                             |
| 756 | P44883 | <i>Haemophilus influenzae</i>                 |
| 757 | Q9NRR1 | <i>Homo sapiens</i>                           |
| 758 | P35150 | <i>Bacillus subtilis</i>                      |
| 759 | B3EWP3 | <i>Arachis hypogaea</i>                       |
| 760 | P69241 | <i>Raphanus sativus</i>                       |
| 761 | P46165 | <i>Bos taurus</i>                             |
| 762 | P0AEE5 | <i>Escherichia coli</i>                       |
| 763 | P18278 | <i>Acetobacter aceti</i>                      |
| 764 | P15279 | <i>Methylobacterium organophilum</i>          |
| 765 | P12293 | <i>Paracoccus denitrificans</i>               |
| 766 | P22641 | <i>Paracoccus versutus</i>                    |
| 767 | P37735 | <i>Rhodobacter capsulatus</i>                 |

|     |        |                                     |
|-----|--------|-------------------------------------|
| 768 | Q8H6Q1 | <i>Petunia hybrida</i>              |
| 769 | P46162 | <i>Bos taurus</i>                   |
| 770 | P46163 | <i>Bos taurus</i>                   |
| 771 | B5LZ79 | <i>Gymnadenia conopsea</i>          |
| 772 | Q9UBT3 | <i>Homo sapiens</i>                 |
| 773 | P30224 | <i>Arabidopsis thaliana</i>         |
| 774 | C0HJZ1 | <i>Arachis hypogaea</i>             |
| 775 | P19427 | <i>Bos taurus</i>                   |
| 776 | P16027 | <i>Methylobacterium extorquens</i>  |
| 777 | P38540 | <i>Methylophilus methylotrophus</i> |
| 778 | O18998 | <i>Oryctolagus cuniculus</i>        |
| 779 | P59665 | <i>Homo sapiens</i>                 |
| 780 | B3EWP4 | <i>Arachis hypogaea</i>             |
| 781 | P26780 | <i>Sinapis alba</i>                 |
| 782 | Q8T0W8 | <i>Gastrophysa atrocyanea</i>       |
| 783 | Q9SUQ8 | <i>Arabidopsis thaliana</i>         |
| 784 | Q75WF2 | <i>Acanthaster planci</i>           |
| 785 | P00639 | <i>Bos taurus</i>                   |
| 786 | P24855 | <i>Homo sapiens</i>                 |
| 787 | P39099 | <i>Escherichia coli</i>             |
| 788 | O94907 | <i>Homo sapiens</i>                 |
| 789 | P16444 | <i>Homo sapiens</i>                 |
| 790 | P31429 | <i>Oryctolagus cuniculus</i>        |
| 791 | Q9UBP4 | <i>Homo sapiens</i>                 |
| 792 | P24093 | <i>Escherichia coli</i>             |
| 793 | P77202 | <i>Escherichia coli</i>             |
| 794 | Q01460 | <i>Rattus norvegicus</i>            |
| 795 | P18684 | <i>Protophormia terraenovae</i>     |
| 796 | P81999 | <i>Canis lupus familiaris</i>       |
| 797 | O42446 | <i>Oreochromis mossambicus</i>      |
| 798 | B2RIT0 | <i>Porphyromonas gingivalis</i>     |
| 799 | P00588 | <i>Corynebacterium beta</i>         |
| 800 | Q6E0U4 | <i>Homo sapiens</i>                 |
| 801 | P22412 | <i>Sus scrofa</i>                   |
| 802 | B2RKV3 | <i>Porphyromonas gingivalis</i>     |
| 803 | P0AEG6 | <i>Escherichia coli</i>             |
| 804 | P23903 | <i>Bacillus circulans</i>           |
| 805 | P11936 | <i>Sus scrofa</i>                   |
| 806 | Q02126 | <i>Hordeum vulgare</i>              |
| 807 | P94522 | <i>Bacillus subtilis</i>            |
| 808 | P04067 | <i>Streptomyces plicatus</i>        |
| 809 | P12724 | <i>Homo sapiens</i>                 |
| 810 | B0XRV0 | <i>Neosartorya fumigata</i>         |

|     |        |                                |
|-----|--------|--------------------------------|
| 811 | P23847 | Escherichia coli               |
| 812 | P0AEG4 | Escherichia coli               |
| 813 | Q62598 | Rattus norvegicus              |
| 814 | F7J1C8 | Flammulina velutipes           |
| 815 | P36911 | Elizabethkingia meningoseptica |
| 816 | P11919 | Manduca sexta                  |
| 817 | Q61508 | Mus musculus                   |
| 818 | P24121 | Staphylococcus aureus          |
| 819 | P05305 | Homo sapiens                   |
| 820 | G9M8X1 | Nephotettix cincticeps         |
| 821 | Q6RUF5 | Clostridium perfringens        |
| 822 | P0C8Z8 | Escherichia coli O18:K1:H7     |
| 823 | F8WQK8 | Porphyromonas endodontalis     |
| 824 | P82593 | Streptomyces chartreusis       |
| 825 | P20827 | Homo sapiens                   |
| 826 | Q9GU69 | Lymnaea stagnalis              |
| 827 | P25331 | Bombyx mori                    |
| 828 | Q62894 | Rattus norvegicus              |
| 829 | Q9ZT66 | Zea mays                       |
| 830 | P0CK94 | Escherichia coli               |
| 831 | P32890 | Escherichia coli               |
| 832 | Q9M069 | Arabidopsis thaliana           |
| 833 | P15737 | Hordeum vulgare                |
| 834 | P22388 | Rattus norvegicus              |
| 835 | P52798 | Homo sapiens                   |
| 836 | P19957 | Homo sapiens                   |
| 837 | F1N5C8 | Bos taurus                     |
| 838 | P01553 | Staphylococcus aureus          |
| 839 | P80036 | Flavobacterium sp.             |
| 840 | P23827 | Escherichia coli               |
| 841 | Q29143 | Trichosurus vulpecula          |
| 842 | Q99372 | Rattus norvegicus              |
| 843 | Q39688 | Daucus carota                  |
| 844 | Q99944 | Homo sapiens                   |
| 845 | P15570 | Phytophthora cryptogea         |
| 846 | Q96HE7 | Homo sapiens                   |
| 847 | P35578 | Zootoca vivipara               |
| 848 | Q9EZE7 | Escherichia coli O127:H6       |
| 849 | P23141 | Homo sapiens                   |
| 850 | Q8I034 | Felis catus                    |
| 851 | Q63010 | Rattus norvegicus              |
| 852 | P22266 | Streptomyces scabiei           |
| 853 | P35501 | Myzus persicae                 |

|     |        |                              |
|-----|--------|------------------------------|
| 854 | Q07792 | Vibrio mimicus               |
| 855 | P0A0L2 | Staphylococcus aureus        |
| 856 | P01552 | Staphylococcus aureus        |
| 857 | P12993 | Staphylococcus aureus        |
| 858 | P04552 | Haliotis rufescens           |
| 859 | O97939 | Sus scrofa                   |
| 860 | Q5JNJ5 | Oryza sativa subsp. japonica |
| 861 | Q64610 | Rattus norvegicus            |
| 862 | Q8I817 | Aplysia californica          |
| 863 | P28770 | Oncorhynchus mykiss          |
| 864 | P81623 | Bos taurus                   |
| 865 | P30040 | Homo sapiens                 |
| 866 | Q04457 | Caenorhabditis elegans       |
| 867 | P12337 | Oryctolagus cuniculus        |
| 868 | P0C8E8 | Rhipicephalus sanguineus     |
| 869 | P14756 | Pseudomonas aeruginosa       |
| 870 | P21128 | Homo sapiens                 |
| 871 | P01588 | Homo sapiens                 |
| 872 | Q8BK48 | Mus musculus                 |
| 873 | Q79F14 | Bacillus subtilis            |
| 874 | P50448 | Bos taurus                   |
| 875 | P14625 | Homo sapiens                 |
| 876 | P12992 | Heliothis virescens          |
| 877 | P58738 | Zea mays                     |
| 878 | Q07154 | Zea mays                     |
| 879 | Q20224 | Caenorhabditis elegans       |
| 880 | P39176 | Escherichia coli             |
| 881 | Q7BSW5 | Escherichia coli O157:H7     |
| 882 | P81429 | Schizaphis graminum          |
| 883 | P21760 | Gallus gallus                |
| 884 | P98140 | Bos taurus                   |
| 885 | O00748 | Homo sapiens                 |
| 886 | P00748 | Homo sapiens                 |
| 887 | P17259 | Neisseria gonorrhoeae        |
| 888 | P10959 | Rattus norvegicus            |
| 889 | O30434 | Enterococcus faecium         |
| 890 | P23142 | Homo sapiens                 |
| 891 | O75636 | Homo sapiens                 |
| 892 | P13036 | Escherichia coli             |
| 893 | P0C8E7 | Rhipicephalus sanguineus     |
| 894 | Q1ZYQ8 | Zea mays                     |
| 895 | O48818 | Arabidopsis thaliana         |
| 896 | P05160 | Homo sapiens                 |

|     |        |                                    |
|-----|--------|------------------------------------|
| 897 | Q04962 | <i>Cavia porcellus</i>             |
| 898 | P02970 | <i>Escherichia coli</i>            |
| 899 | P02771 | <i>Homo sapiens</i>                |
| 900 | O95750 | <i>Homo sapiens</i>                |
| 901 | P0C1Y5 | <i>Zea mays</i>                    |
| 902 | Q99003 | <i>Escherichia coli</i>            |
| 903 | P10675 | <i>Schistocerca americana</i>      |
| 904 | P37889 | <i>Mus musculus</i>                |
| 905 | P30438 | <i>Felis catus</i>                 |
| 906 | P36980 | <i>Homo sapiens</i>                |
| 907 | Q26427 | <i>Galleria mellonella</i>         |
| 908 | Q47223 | <i>Escherichia coli</i>            |
| 909 | Q9NWM8 | <i>Homo sapiens</i>                |
| 910 | Q41649 | <i>Vicia faba</i>                  |
| 911 | Q7SZN0 | <i>Pseudonaja textilis</i>         |
| 912 | P10384 | <i>Escherichia coli</i>            |
| 913 | Q08879 | <i>Mus musculus</i>                |
| 914 | P30440 | <i>Felis catus</i>                 |
| 915 | Q5KQS1 | <i>Gloydius blomhoffii</i>         |
| 916 | Q9NSA1 | <i>Homo sapiens</i>                |
| 917 | P02675 | <i>Homo sapiens</i>                |
| 918 | P02679 | <i>Homo sapiens</i>                |
| 919 | O42807 | <i>Aspergillus niger</i>           |
| 920 | Q9HE18 | <i>Talaromyces funiculosus</i>     |
| 921 | P35755 | <i>Haemophilus influenzae</i>      |
| 922 | Q05202 | <i>Yersinia enterocolitica</i>     |
| 923 | Q9GZV9 | <i>Homo sapiens</i>                |
| 924 | P12799 | <i>Bos taurus</i>                  |
| 925 | P21828 | <i>Bombyx mori</i>                 |
| 926 | Q18184 | <i>Caenorhabditis elegans</i>      |
| 927 | P12266 | <i>Klebsiella pneumoniae</i>       |
| 928 | P33781 | <i>Escherichia coli</i>            |
| 929 | P12061 | <i>Salmonella enteritidis</i>      |
| 930 | Q8WZI8 | <i>Aspergillus niger</i>           |
| 931 | B8M9H9 | <i>Talaromyces stipitatus</i>      |
| 932 | A1C3L3 | <i>Streptococcus parasanguinis</i> |
| 933 | Q7L513 | <i>Homo sapiens</i>                |
| 934 | P02765 | <i>Homo sapiens</i>                |
| 935 | P0AEM9 | <i>Escherichia coli</i>            |
| 936 | A1X158 | <i>Perna viridis</i>               |
| 937 | A1X159 | <i>Perna viridis</i>               |
| 938 | P35555 | <i>Homo sapiens</i>                |
| 939 | O00602 | <i>Homo sapiens</i>                |

|     |        |                                   |
|-----|--------|-----------------------------------|
| 940 | P12763 | <i>Bos taurus</i>                 |
| 941 | P16869 | <i>Escherichia coli</i>           |
| 942 | P02672 | <i>Bos taurus</i>                 |
| 943 | P14448 | <i>Gallus gallus</i>              |
| 944 | P02671 | <i>Homo sapiens</i>               |
| 945 | P04937 | <i>Rattus norvegicus</i>          |
| 946 | P45523 | <i>Escherichia coli</i>           |
| 947 | P32520 | <i>Brachyspira hyodysenteriae</i> |
| 948 | P13421 | <i>Serratia marcescens</i>        |
| 949 | E3PPC4 | <i>Escherichia coli</i> O78:H11   |
| 950 | P01227 | <i>Ovis aries</i>                 |
| 951 | O70165 | <i>Mus musculus</i>               |
| 952 | P21781 | <i>Homo sapiens</i>               |
| 953 | P37921 | <i>Salmonella typhimurium</i>     |
| 954 | P31697 | <i>Escherichia coli</i>           |
| 955 | P02751 | <i>Homo sapiens</i>               |
| 956 | P21982 | <i>Spirochaeta aurantia</i>       |
| 957 | Q99MG7 | <i>Mesocricetus auratus</i>       |
| 958 | P02702 | <i>Bos taurus</i>                 |
| 959 | Q9Z4P0 | <i>Shewanella frigidimarina</i>   |
| 960 | P01226 | <i>Equus caballus</i>             |
| 961 | P05790 | <i>Bombyx mori</i>                |
| 962 | Q8TAL6 | <i>Homo sapiens</i>               |
| 963 | P30130 | <i>Escherichia coli</i>           |
| 964 | P08191 | <i>Escherichia coli</i>           |
| 965 | P18477 | <i>Actinomyces viscosus</i>       |
| 966 | Q12841 | <i>Homo sapiens</i>               |
| 967 | O95633 | <i>Homo sapiens</i>               |
| 968 | P19883 | <i>Homo sapiens</i>               |
| 969 | P97515 | <i>Meriones unguiculatus</i>      |
| 970 | P24090 | <i>Rattus norvegicus</i>          |
| 971 | P06399 | <i>Rattus norvegicus</i>          |
| 972 | O60046 | <i>Neurospora crassa</i>          |
| 973 | P12903 | <i>Klebsiella pneumoniae</i>      |
| 974 | P31515 | <i>Xenopus laevis</i>             |
| 975 | P17164 | <i>Rattus norvegicus</i>          |
| 976 | O34215 | <i>Pantoea cyripedii</i>          |
| 977 | P0A1N4 | <i>Salmonella typhimurium</i>     |
| 978 | P19369 | <i>Aeromonas hydrophila</i>       |
| 979 | P15488 | <i>Escherichia coli</i>           |
| 980 | B0JFB8 | <i>Antheraea mylitta</i>          |
| 981 | P42512 | <i>Pseudomonas aeruginosa</i>     |
| 982 | P34115 | <i>Dictyostelium discoideum</i>   |

|      |        |                              |
|------|--------|------------------------------|
| 983  | P0CS93 | Gibberella zeae              |
| 984  | Q867W1 | Procambarus clarkii          |
| 985  | P01225 | Homo sapiens                 |
| 986  | P34116 | Dictyostelium discoideum     |
| 987  | O34214 | Pantoea cypripedii           |
| 988  | P54803 | Homo sapiens                 |
| 989  | P22146 | Saccharomyces cerevisiae     |
| 990  | Q07WU7 | Shewanella frigidimarina     |
| 991  | P42578 | Lymnaea stagnalis            |
| 992  | P41822 | Aedes aegypti                |
| 993  | P01228 | Sus scrofa                   |
| 994  | P05149 | Acinetobacter calcoaceticus  |
| 995  | P48842 | Aspergillus aculeatus        |
| 996  | P07662 | Pseudomonas sp.              |
| 997  | P07093 | Homo sapiens                 |
| 998  | O60609 | Homo sapiens                 |
| 999  | E9K9Z1 | Lactobacillus plantarum      |
| 1000 | Q8JFY4 | Anguilla japonica            |
| 1001 | P02226 | Chironomus thummi thummi     |
| 1002 | P80195 | Bos taurus                   |
| 1003 | P04062 | Homo sapiens                 |
| 1004 | P01350 | Homo sapiens                 |
| 1005 | Q90W22 | Lithobates catesbeiana       |
| 1006 | Q76IQ4 | Oncorhynchus mykiss          |
| 1007 | P55320 | Homarus americanus           |
| 1008 | P84298 | Chironomus thummi thummi     |
| 1009 | P28316 | Ascaris suum                 |
| 1010 | P01215 | Homo sapiens                 |
| 1011 | P07474 | Oryctolagus cuniculus        |
| 1012 | Q9TT95 | Sus scrofa                   |
| 1013 | Q8BHN3 | Mus musculus                 |
| 1014 | Q6YZY5 | Oryza sativa subsp. japonica |
| 1015 | O82833 | Bacillus sp.                 |
| 1016 | Q9EQX0 | Mus musculus                 |
| 1017 | P12550 | Chironomus thummi thummi     |
| 1018 | P02223 | Chironomus thummi thummi     |
| 1019 | Q7M413 | Oligobranchia mashikoi       |
| 1020 | Q7M418 | Oligobranchia mashikoi       |
| 1021 | Q02596 | Mus musculus                 |
| 1022 | L8BRS3 | Morus alba                   |
| 1023 | P07728 | Oryza sativa subsp. japonica |
| 1024 | B0XT72 | Neosartorya fumigata         |
| 1025 | Q6ZBZ2 | Oryza sativa subsp. japonica |



|      |        |                              |
|------|--------|------------------------------|
| 1026 | P01218 | Ovis aries                   |
| 1027 | P18956 | Escherichia coli             |
| 1028 | P11069 | Lumbricus terrestris         |
| 1029 | P15522 | Camelus dromedarius          |
| 1030 | P01221 | Cyprinus carpio              |
| 1031 | P07730 | Oryza sativa subsp. japonica |
| 1032 | Q95VP2 | Epiphyas postvittana         |
| 1033 | Q62867 | Rattus norvegicus            |
| 1034 | P01217 | Bos taurus                   |
| 1035 | P09394 | Escherichia coli             |
| 1036 | P04405 | Glycine max                  |
| 1037 | P49921 | Sus scrofa                   |
| 1038 | P51919 | Sparus aurata                |
| 1039 | P21978 | Leishmania amazonensis       |
| 1040 | Q6IV20 | Gallus gallus                |
| 1041 | Q942A7 | Oryza sativa subsp. japonica |
| 1042 | Q7M419 | Oligobranchia mashikoi       |
| 1043 | Q5KSB7 | Oligobranchia mashikoi       |
| 1044 | P81447 | Capra hircus                 |
| 1045 | P0AEQ3 | Escherichia coli             |
| 1046 | P01274 | Sus scrofa                   |
| 1047 | P82358 | Acanthoscurria gomesiana     |
| 1048 | P37042 | Gallus gallus                |
| 1049 | P25291 | Canis lupus familiaris       |
| 1050 | P35052 | Homo sapiens                 |
| 1051 | P29794 | Canis lupus familiaris       |
| 1052 | P51918 | Haplochromis burtoni         |
| 1053 | P01148 | Homo sapiens                 |
| 1054 | P43306 | Clarias gariepinus           |
| 1055 | P51925 | Sparus aurata                |
| 1056 | Q6UWM5 | Homo sapiens                 |
| 1057 | P28798 | Mus musculus                 |
| 1058 | P11021 | Homo sapiens                 |
| 1059 | P37902 | Escherichia coli             |
| 1060 | P04706 | Zea mays                     |
| 1061 | Q95VP3 | Epiphyas postvittana         |
| 1062 | P10144 | Homo sapiens                 |
| 1063 | P10256 | Oncorhynchus keta            |
| 1064 | Q52085 | Polysphondylium pallidum     |
| 1065 | P09341 | Homo sapiens                 |
| 1066 | P37696 | Komagataeibacter hansenii    |
| 1067 | P37699 | Clostridium cellulolyticum   |
| 1068 | P28623 | Clostridium cellulovorans    |

|      |        |                                                     |
|------|--------|-----------------------------------------------------|
| 1069 | P35053 | <i>Rattus norvegicus</i>                            |
| 1070 | Q2U4L7 | <i>Aspergillus oryzae</i>                           |
| 1071 | O14412 | <i>Orpinomyces</i> sp.                              |
| 1072 | P33682 | <i>Streptomyces halstedii</i>                       |
| 1073 | P10475 | <i>Bacillus subtilis</i>                            |
| 1074 | P18126 | <i>Cellvibrio japonicus</i>                         |
| 1075 | P14090 | <i>Cellulomonas fimi</i>                            |
| 1076 | A3DH67 | <i>Clostridium thermocellum</i>                     |
| 1077 | P14095 | <i>Rattus norvegicus</i>                            |
| 1078 | P20029 | <i>Mus musculus</i>                                 |
| 1079 | P04957 | <i>Bacillus subtilis</i>                            |
| 1080 | P22541 | <i>Butyrivibrio fibrisolvens</i>                    |
| 1081 | P27035 | <i>Streptomyces lividans</i>                        |
| 1082 | P18336 | <i>Cellulomonas uda</i>                             |
| 1083 | P50401 | <i>Cellulomonas fimi</i>                            |
| 1084 | Q14520 | <i>Homo sapiens</i>                                 |
| 1085 | O18994 | <i>Sus scrofa</i>                                   |
| 1086 | C9K4X8 | <i>Patiria pectinifera</i>                          |
| 1087 | P23659 | <i>Clostridium stercorearium</i>                    |
| 1088 | Q01528 | <i>Limulus polyphemus</i>                           |
| 1089 | Q8K0D2 | <i>Mus musculus</i>                                 |
| 1090 | Q95P08 | <i>Scutigera coleoptrata</i>                        |
| 1091 | O60565 | <i>Homo sapiens</i>                                 |
| 1092 | P53543 | <i>Clarias gariepinus</i>                           |
| 1093 | P01235 | <i>Cyprinus carpio</i>                              |
| 1094 | P07982 | <i>Hypocrea jecorina</i>                            |
| 1095 | P07987 | <i>Hypocrea jecorina</i>                            |
| 1096 | P15644 | <i>Klebsiella pneumoniae</i>                        |
| 1097 | P10257 | <i>Oncorhynchus keta</i>                            |
| 1098 | P26221 | <i>Thermobifida fusca</i>                           |
| 1099 | Q9C9H5 | <i>Arabidopsis thaliana</i>                         |
| 1100 | P17901 | <i>Clostridium cellulolyticum</i>                   |
| 1101 | P27033 | <i>Cellvibrio japonicus</i>                         |
| 1102 | P27032 | <i>Dickeya dadantii</i>                             |
| 1103 | P23044 | <i>Robillarda</i> sp.                               |
| 1104 | P17989 | <i>Fibrobacter succinogenes</i>                     |
| 1105 | Q02747 | <i>Homo sapiens</i>                                 |
| 1106 | Q8J0I9 | <i>Trichoderma harzianum</i>                        |
| 1107 | P16216 | <i>Ruminococcus albus</i>                           |
| 1108 | Q05156 | <i>Streptomyces reticuli</i>                        |
| 1109 | Q5NAT0 | <i>Oryza sativa</i> subsp. <i>japonica</i>          |
| 1110 | P19487 | <i>Xanthomonas campestris</i> pv. <i>campestris</i> |

|      |        |                                                  |
|------|--------|--------------------------------------------------|
| 1111 | Q02934 | <i>Clostridium thermocellum</i>                  |
| 1112 | Q8IFJ8 | <i>Scutigera coleoptrata</i>                     |
| 1113 | O88093 | <i>Escherichia coli</i>                          |
| 1114 | P05546 | <i>Homo sapiens</i>                              |
| 1115 | C6XZB6 | <i>Pedobacter heparinus</i>                      |
| 1116 | Q07558 | <i>Poecilobdella manillensis</i>                 |
| 1117 | Q59289 | <i>Pedobacter heparinus</i>                      |
| 1118 | P02877 | <i>Hevea brasiliensis</i>                        |
| 1119 | P43077 | <i>Candida albicans</i>                          |
| 1120 | P00260 | <i>Allochromatium vinosum</i>                    |
| 1121 | P25033 | <i>Hyalophora cecropia</i>                       |
| 1122 | P50828 | <i>Sus scrofa</i>                                |
| 1123 | P20059 | <i>Rattus norvegicus</i>                         |
| 1124 | P06865 | <i>Homo sapiens</i>                              |
| 1125 | P76341 | <i>Escherichia coli</i>                          |
| 1126 | P09616 | <i>Staphylococcus aureus</i>                     |
| 1127 | P16466 | <i>Proteus mirabilis</i>                         |
| 1128 | Q06576 | <i>Tamias sibiricus</i>                          |
| 1129 | P02790 | <i>Homo sapiens</i>                              |
| 1130 | P20058 | <i>Oryctolagus cuniculus</i>                     |
| 1131 | Q05819 | <i>Pedobacter heparinus</i>                      |
| 1132 | Q47952 | <i>Haemophilus ducreyi</i>                       |
| 1133 | Q04756 | <i>Homo sapiens</i>                              |
| 1134 | P14210 | <i>Homo sapiens</i>                              |
| 1135 | P14212 | <i>Haemophilus influenzae</i>                    |
| 1136 | E1V825 | <i>Halomonas elongata</i>                        |
| 1137 | Q06577 | <i>Tamias sibiricus</i>                          |
| 1138 | P00739 | <i>Homo sapiens</i>                              |
| 1139 | P49182 | <i>Mus musculus</i>                              |
| 1140 | Q4VYA5 | <i>Salmonella dublin</i>                         |
| 1141 | Q0Z8B6 | <i>Enterococcus hirae</i>                        |
| 1142 | Q25055 | <i>Holotrichia diomphalia</i>                    |
| 1143 | Q06575 | <i>Tamias sibiricus</i>                          |
| 1144 | Q9GQV7 | <i>Aedes aegypti</i>                             |
| 1145 | P00738 | <i>Homo sapiens</i>                              |
| 1146 | P15515 | <i>Homo sapiens</i>                              |
| 1147 | P0AEU0 | <i>Escherichia coli</i>                          |
| 1148 | P0A074 | <i>Staphylococcus aureus</i>                     |
| 1149 | P19250 | <i>Vibrio parahaemolyticus</i> serotype<br>O3:K6 |
| 1150 | P15320 | <i>Serratia marcescens</i>                       |
| 1151 | P09545 | <i>Vibrio cholerae</i> serotype O1               |
| 1152 | Q9Y251 | <i>Homo sapiens</i>                              |

|      |        |                                           |
|------|--------|-------------------------------------------|
| 1153 | P02910 | Salmonella typhimurium                    |
| 1154 | P01795 | Mus musculus                              |
| 1155 | C4NZN9 | Hyas araneus                              |
| 1156 | Q99289 | Vibrio parahaemolyticus serotype<br>O3:K6 |
| 1157 | P32478 | Saccharomyces cerevisiae                  |
| 1158 | O50319 | Yersinia enterocolitica                   |
| 1159 | P86875 | Vespa magnifica                           |
| 1160 | Q9VG55 | Drosophila melanogaster                   |
| 1161 | P13691 | Hordeum vulgare                           |
| 1162 | P01083 | Triticum aestivum                         |
| 1163 | P16850 | Triticum aestivum                         |
| 1164 | P21743 | Rattus norvegicus                         |
| 1165 | P24854 | Sus scrofa                                |
| 1166 | P35572 | Rattus norvegicus                         |
| 1167 | Q16270 | Homo sapiens                              |
| 1168 | P15321 | Serratia marcescens                       |
| 1169 | P19007 | Oryctolagus cuniculus                     |
| 1170 | P04196 | Homo sapiens                              |
| 1171 | P01783 | Mus musculus                              |
| 1172 | P45354 | Haemophilus influenzae                    |
| 1173 | P86100 | Mesobuthus martensii                      |
| 1174 | P16851 | Triticum aestivum                         |
| 1175 | P08833 | Homo sapiens                              |
| 1176 | P13384 | Bos taurus                                |
| 1177 | P33129 | Escherichia coli                          |
| 1178 | P07596 | Hordeum vulgare                           |
| 1179 | Q4WZ11 | Neosartorya fumigata                      |
| 1180 | P01568 | Homo sapiens                              |
| 1181 | P01572 | Mus musculus                              |
| 1182 | P01563 | Homo sapiens                              |
| 1183 | P32881 | Homo sapiens                              |
| 1184 | Q17128 | Blaberus discoidalis                      |
| 1185 | Q63617 | Rattus norvegicus                         |
| 1186 | O95998 | Homo sapiens                              |
| 1187 | Q969J5 | Homo sapiens                              |
| 1188 | P32936 | Hordeum vulgare                           |
| 1189 | P01086 | Hordeum vulgare                           |
| 1190 | P12843 | Rattus norvegicus                         |
| 1191 | P17936 | Homo sapiens                              |
| 1192 | P01068 | Ananas comosus                            |
| 1193 | Q8MM24 | Drosophila melanogaster                   |
| 1194 | P01570 | Homo sapiens                              |

|      |        |                              |
|------|--------|------------------------------|
| 1195 | P01562 | Homo sapiens                 |
| 1196 | P01344 | Homo sapiens                 |
| 1197 | P01591 | Homo sapiens                 |
| 1198 | P29459 | Homo sapiens                 |
| 1199 | P29460 | Homo sapiens                 |
| 1200 | P17314 | Triticum aestivum            |
| 1201 | P16159 | Triticum aestivum            |
| 1202 | P26461 | Sus scrofa                   |
| 1203 | P15473 | Rattus norvegicus            |
| 1204 | P21744 | Rattus norvegicus            |
| 1205 | P05013 | Homo sapiens                 |
| 1206 | Q9P0W0 | Homo sapiens                 |
| 1207 | P07456 | Bos taurus                   |
| 1208 | Q6UW32 | Homo sapiens                 |
| 1209 | P60568 | Homo sapiens                 |
| 1210 | P19874 | Oryctolagus cuniculus        |
| 1211 | P15247 | Mus musculus                 |
| 1212 | P01822 | Mus musculus                 |
| 1213 | P05155 | Homo sapiens                 |
| 1214 | Q8MLZ7 | Drosophila melanogaster      |
| 1215 | P01569 | Homo sapiens                 |
| 1216 | P01579 | Homo sapiens                 |
| 1217 | P12707 | Xenopus laevis               |
| 1218 | Q9Z0M9 | Mus musculus                 |
| 1219 | P11643 | Hordeum vulgare              |
| 1220 | P29421 | Oryza sativa subsp. japonica |
| 1221 | P01092 | Streptomyces tendae          |
| 1222 | P82594 | Streptomyces chartreusis     |
| 1223 | P20959 | Bos taurus                   |
| 1224 | P16611 | Sus scrofa                   |
| 1225 | P22692 | Homo sapiens                 |
| 1226 | P83472 | Lumbricus terrestris         |
| 1227 | P10822 | Psophocarpus tetragonolobus  |
| 1228 | P05000 | Homo sapiens                 |
| 1229 | P01346 | Rattus norvegicus            |
| 1230 | Q9GZX6 | Homo sapiens                 |
| 1231 | P08505 | Mus musculus                 |
| 1232 | P01325 | Mus musculus                 |
| 1233 | P81025 | Oreochromis niloticus        |
| 1234 | P01318 | Ovis aries                   |
| 1235 | O00105 | Aspergillus niger            |
| 1236 | P28041 | Hordeum vulgare              |
| 1237 | P34951 | Hordeum vulgare              |

|      |        |                         |
|------|--------|-------------------------|
| 1238 | P56829 | Ovis aries              |
| 1239 | Q6UXB1 | Homo sapiens            |
| 1240 | Q96PD4 | Homo sapiens            |
| 1241 | Q9H293 | Homo sapiens            |
| 1242 | P12706 | Xenopus laevis          |
| 1243 | P05154 | Homo sapiens            |
| 1244 | Q9LAB5 | Staphylococcus aureus   |
| 1245 | P00996 | Bos taurus              |
| 1246 | P18510 | Homo sapiens            |
| 1247 | Q13007 | Homo sapiens            |
| 1248 | P26894 | Sus scrofa              |
| 1249 | P07994 | Bos taurus              |
| 1250 | P51460 | Homo sapiens            |
| 1251 | P01335 | Cyprinus carpio         |
| 1252 | P06306 | Felis catus             |
| 1253 | P01308 | Homo sapiens            |
| 1254 | P01311 | Oryctolagus cuniculus   |
| 1255 | Q05918 | Nostoc commune          |
| 1256 | Q2FV52 | Staphylococcus aureus   |
| 1257 | P26501 | Pseudomonas sp.         |
| 1258 | P01567 | Homo sapiens            |
| 1259 | P10764 | Ovis aries              |
| 1260 | Q16552 | Homo sapiens            |
| 1261 | Q9NYY1 | Homo sapiens            |
| 1262 | P05113 | Homo sapiens            |
| 1263 | P18958 | Dickeya chrysanthemi    |
| 1264 | P01326 | Mus musculus            |
| 1265 | Q14641 | Homo sapiens            |
| 1266 | Q96TU3 | Aspergillus awamori     |
| 1267 | P01005 | Gallus gallus           |
| 1268 | P37109 | Sus scrofa              |
| 1269 | P22301 | Homo sapiens            |
| 1270 | Q9UHD0 | Homo sapiens            |
| 1271 | P05231 | Homo sapiens            |
| 1272 | P01322 | Rattus norvegicus       |
| 1273 | P01321 | Canis lupus familiaris  |
| 1274 | P01317 | Bos taurus              |
| 1275 | P17715 | Octodon degus           |
| 1276 | P31608 | Sagittaria sagittifolia |
| 1277 | P79263 | Sus scrofa              |
| 1278 | P10145 | Homo sapiens            |
| 1279 | P01077 | Streptomyces nigrescens |
| 1280 | P01323 | Rattus norvegicus       |

|      |        |                                  |
|------|--------|----------------------------------|
| 1281 | O77801 | Bos taurus                       |
| 1282 | P01313 | Cricetulus longicaudatus         |
| 1283 | P10184 | Gallus gallus                    |
| 1284 | P07479 | Sagittaria sagittifolia          |
| 1285 | P20155 | Homo sapiens                     |
| 1286 | Q6UWN8 | Homo sapiens                     |
| 1287 | P01342 | Myxine glutinosa                 |
| 1288 | Q8MVA6 | Ixodes scapularis                |
| 1289 | P09655 | Rattus norvegicus                |
| 1290 | P01001 | Bos taurus                       |
| 1291 | Q14624 | Homo sapiens                     |
| 1292 | Q9NII5 | Mesobuthus martensii             |
| 1293 | C0HJQ8 | Mesobuthus eupeus                |
| 1294 | Q9NII7 | Mesobuthus martensii             |
| 1295 | C0HJQ4 | Mesobuthus eupeus                |
| 1296 | P0DL37 | Urodacus yaschenkoi              |
| 1297 | Q9NJP7 | Mesobuthus martensii             |
| 1298 | C7G3K3 | Liocheles australasiae           |
| 1299 | Q9Y5Q6 | Homo sapiens                     |
| 1300 | P67970 | Gallus gallus                    |
| 1301 | P01329 | Cavia porcellus                  |
| 1302 | P04667 | Oncorhynchus keta                |
| 1303 | P01315 | Sus scrofa                       |
| 1304 | P00724 | Saccharomyces cerevisiae         |
| 1305 | P05560 | Dromaius novaehollandiae         |
| 1306 | Q9N2I2 | Bos taurus                       |
| 1307 | Q5DT21 | Homo sapiens                     |
| 1308 | P0AD59 | Escherichia coli                 |
| 1309 | Q95NK7 | Mesobuthus martensii             |
| 1310 | A9XE60 | Mesobuthus eupeus                |
| 1311 | P09656 | Rattus norvegicus                |
| 1312 | P00995 | Homo sapiens                     |
| 1313 | Q95NJ8 | Mesobuthus martensii             |
| 1314 | P0C1X6 | Tityus discrepans                |
| 1315 | Q5G8A6 | Tityus costatus                  |
| 1316 | Q8WWA0 | Homo sapiens                     |
| 1317 | P01088 | Zea mays                         |
| 1318 | P62520 | Chilobrachys guangxiensis        |
| 1319 | Q9NBG9 | Mesobuthus martensii             |
| 1320 | P13487 | Leiurus quinquestriatus hebraeus |
| 1321 | C0HJQ5 | Mesobuthus eupeus                |
| 1322 | P56972 | Pandinus imperator               |
| 1323 | P01070 | Glycine max                      |

|      |        |                                                       |
|------|--------|-------------------------------------------------------|
| 1324 | Q9PTT2 | Lepidobatrachus laevis                                |
| 1325 | P00757 | Mus musculus                                          |
| 1326 | Q8I0L5 | Mesobuthus martensii                                  |
| 1327 | Q867F4 | Androctonus australis                                 |
| 1328 | Q5K0E0 | Androctonus amoreuxi                                  |
| 1329 | B3EWY1 | Mesobuthus gibbosus                                   |
| 1330 | P45628 | Leiurus quinquestriatus hebraeus                      |
| 1331 | Q9TVX3 | Mesobuthus martensii                                  |
| 1332 | P0C194 | Opisthacanthus madagascariensis                       |
| 1333 | P07288 | Homo sapiens                                          |
| 1334 | Q9U8D2 | Mesobuthus martensii                                  |
| 1335 | Q9BKB7 | Mesobuthus eupeus                                     |
| 1336 | Q9BJX2 | Mesobuthus martensii                                  |
| 1337 | P84777 | Tityus discrepans                                     |
| 1338 | D3JXM1 | Mesobuthus eupeus                                     |
| 1339 | P0C908 | Buthus occitanus israelis                             |
| 1340 | Q934G3 | Dickeya dadantii                                      |
| 1341 | Q86QT3 | Centruroides noxius                                   |
| 1342 | Q00870 | Fusarium solani subsp. phaseoli                       |
| 1343 | P45696 | Androctonus australis                                 |
| 1344 | Q96I82 | Homo sapiens                                          |
| 1345 | Q0GY40 | Hadrurus gertschi                                     |
| 1346 | P49862 | Homo sapiens                                          |
| 1347 | P01042 | Homo sapiens                                          |
| 1348 | O59896 | Pycnopus cinnabarinus                                 |
| 1349 | Q90121 | Ustilago maydis P4 virus                              |
| 1350 | Q9TSN6 | Bubalus bubalis                                       |
| 1351 | P00713 | Cavia porcellus                                       |
| 1352 | P00716 | Oryctolagus cuniculus                                 |
| 1353 | A2AJB7 | Mus musculus                                          |
| 1354 | P01048 | Rattus norvegicus                                     |
| 1355 | Q55P57 | Cryptococcus neoformans var.<br>neoformans serotype D |
| 1356 | P02758 | Equus caballus                                        |
| 1357 | P02754 | Bos taurus                                            |
| 1358 | Q2ULM2 | Aspergillus oryzae                                    |
| 1359 | P17454 | Oryctolagus cuniculus                                 |
| 1360 | Q7JZV0 | Drosophila melanogaster                               |
| 1361 | E1XUJ2 | Castellaniella defragrans                             |
| 1362 | Q6QX33 | Bothrops insularis                                    |
| 1363 | Q9YGP1 | Trimeresurus stejnegeri                               |
| 1364 | Q9ZG90 | Sphingobacterium multivorum                           |
| 1365 | P04119 | Sus scrofa                                            |



|      |        |                         |
|------|--------|-------------------------|
| 1366 | P67976 | Ovis aries              |
| 1367 | P33575 | Petromyzon marinus      |
| 1368 | P04180 | Homo sapiens            |
| 1369 | P91629 | Drosophila miranda      |
| 1370 | Q41162 | Robinia pseudoacacia    |
| 1371 | C6JUN9 | Micrurus corallinus     |
| 1372 | P02872 | Arachis hypogaea        |
| 1373 | Q8WPD0 | Patiria pectinifera     |
| 1374 | P01661 | Mus musculus            |
| 1375 | P01633 | Mus musculus            |
| 1376 | P19137 | Mus musculus            |
| 1377 | Q61001 | Mus musculus            |
| 1378 | Q9HZQ8 | Pseudomonas aeruginosa  |
| 1379 | P06911 | Rattus norvegicus       |
| 1380 | P91627 | Drosophila miranda      |
| 1381 | P92201 | Drosophila melanogaster |
| 1382 | Q39528 | Cladrastis kentukea     |
| 1383 | P07439 | Megabalanus rosa        |
| 1384 | Q99538 | Homo sapiens            |
| 1385 | P81715 | Streptomyces exfoliatus |
| 1386 | P02755 | Bubalus bubalis         |
| 1387 | P00712 | Capra hircus            |
| 1388 | P33577 | Petromyzon marinus      |
| 1389 | P92192 | Drosophila melanogaster |
| 1390 | Q70DJ5 | Arachis hypogaea        |
| 1391 | B2KNH9 | Dendrobium findlayanum  |
| 1392 | P22394 | Geotrichum candidum     |
| 1393 | P06858 | Homo sapiens            |
| 1394 | P01045 | Bos taurus              |
| 1395 | P01634 | Mus musculus            |
| 1396 | P01639 | Mus musculus            |
| 1397 | P07380 | Equus caballus          |
| 1398 | P02756 | Capra hircus            |
| 1399 | P29822 | Rhizobium radiobacter   |
| 1400 | P00709 | Homo sapiens            |
| 1401 | P18137 | Sus scrofa              |
| 1402 | Q60675 | Mus musculus            |
| 1403 | Q61789 | Mus musculus            |
| 1404 | P80060 | Locusta migratoria      |
| 1405 | P31025 | Homo sapiens            |
| 1406 | P82384 | Drosophila melanogaster |
| 1407 | Q39529 | Cladrastis kentukea     |
| 1408 | Q02988 | Pleurodeles waltl       |

|      |        |                              |
|------|--------|------------------------------|
| 1409 | O62644 | Bos taurus                   |
| 1410 | P15917 | Bacillus anthracis           |
| 1411 | Q01584 | Rhinella marina              |
| 1412 | Q05489 | Burkholderia glumae          |
| 1413 | P26877 | Pseudomonas sp.              |
| 1414 | Q9GZZ8 | Homo sapiens                 |
| 1415 | P00714 | Rattus norvegicus            |
| 1416 | A3RJ36 | Bubalus bubalis              |
| 1417 | P23631 | Latrodectus tredecimguttatus |
| 1418 | Q01774 | Drosophila miranda           |
| 1419 | P20013 | Trametes versicolor          |
| 1420 | P40601 | Photorhabdus luminescens     |
| 1421 | P20462 | Macropus eugenii             |
| 1422 | P18428 | Homo sapiens                 |
| 1423 | P02873 | Phaseolus vulgaris           |
| 1424 | P83519 | Bothrops jararacussu         |
| 1425 | Q39527 | Cladrastis kentukea          |
| 1426 | P16030 | Bauhinia purpurea            |
| 1427 | Q08380 | Homo sapiens                 |
| 1428 | P15018 | Homo sapiens                 |
| 1429 | P27657 | Rattus norvegicus            |
| 1430 | P04635 | Staphylococcus hyicus        |
| 1431 | Q8N6C8 | Homo sapiens                 |
| 1432 | P0AD96 | Escherichia coli             |
| 1433 | P04816 | Escherichia coli             |
| 1434 | P16404 | Erythrina corallodendron     |
| 1435 | P02870 | Lens culinaris               |
| 1436 | P09056 | Mus musculus                 |
| 1437 | Q71DJ5 | Arabidopsis thaliana         |
| 1438 | Q62813 | Rattus norvegicus            |
| 1439 | P04651 | Bos taurus                   |
| 1440 | P01229 | Homo sapiens                 |
| 1441 | P25275 | Pseudomonas sp.              |
| 1442 | P10758 | Rattus norvegicus            |
| 1443 | O35806 | Rattus norvegicus            |
| 1444 | O88188 | Mus musculus                 |
| 1445 | P80035 | Canis lupus familiaris       |
| 1446 | P04634 | Rattus norvegicus            |
| 1447 | P11151 | Bos taurus                   |
| 1448 | P61316 | Escherichia coli             |
| 1449 | P31715 | Staphylococcus aureus        |
| 1450 | P12068 | Sus scrofa                   |
| 1451 | P59206 | Streptococcus pneumoniae     |

|      |        |                                    |
|------|--------|------------------------------------|
| 1452 | P54421 | Bacillus subtilis                  |
| 1453 | P07098 | Homo sapiens                       |
| 1454 | P06857 | Canis lupus familiaris             |
| 1455 | Q64424 | Myocastor coypus                   |
| 1456 | P54318 | Rattus norvegicus                  |
| 1457 | P22088 | Burkholderia cepacia               |
| 1458 | Q93MW7 | Streptomyces rimosus               |
| 1459 | Q6UWN5 | Homo sapiens                       |
| 1460 | P0AEX9 | Escherichia coli                   |
| 1461 | Q5ECE3 | Lonomia obliqua                    |
| 1462 | P08751 | Equus caballus                     |
| 1463 | Q6IY74 | Oryctolagus cuniculus              |
| 1464 | P84809 | Buthus occitanus tunetanus         |
| 1465 | P01724 | Mus musculus                       |
| 1466 | P01729 | Mus musculus                       |
| 1467 | P83673 | Crassostrea virginica              |
| 1468 | P01232 | Sus scrofa                         |
| 1469 | P31716 | Staphylococcus aureus              |
| 1470 | P84810 | Buthus occitanus tunetanus         |
| 1471 | P04421 | Bos taurus                         |
| 1472 | P67977 | Semnopithecus entellus             |
| 1473 | P02977 | Streptococcus pyogenes serotype M5 |
| 1474 | Q9UAH3 | Pinctada fucata                    |
| 1475 | P01549 | Streptomyces macromomyceticus      |
| 1476 | P05533 | Mus musculus                       |
| 1477 | O95711 | Homo sapiens                       |
| 1478 | P00719 | Struthio camelus                   |
| 1479 | Q7YT16 | Musca domestica                    |
| 1480 | Q8T1G4 | Dictyostelium discoideum           |
| 1481 | P00698 | Gallus gallus                      |
| 1482 | P61626 | Homo sapiens                       |
| 1483 | P39848 | Bacillus subtilis                  |
| 1484 | Q9NL38 | Pinctada maxima                    |
| 1485 | Q17058 | Apis mellifera                     |
| 1486 | P31723 | Penicillium citrinum               |
| 1487 | P48740 | Homo sapiens                       |
| 1488 | Q9JJS8 | Rattus norvegicus                  |
| 1489 | P19999 | Rattus norvegicus                  |
| 1490 | Q05443 | Bos taurus                         |
| 1491 | Q95P90 | Mesobuthus martensii               |
| 1492 | Q14210 | Homo sapiens                       |
| 1493 | P16636 | Rattus norvegicus                  |
| 1494 | B3A003 | Crassostrea virginica              |

|      |        |                                     |
|------|--------|-------------------------------------|
| 1495 | P61629 | Papio anubis                        |
| 1496 | P00702 | Phasianus colchicus colchicus       |
| 1497 | P85045 | Bufo gargarizans andrewsi           |
| 1498 | O07532 | Bacillus subtilis                   |
| 1499 | O33599 | Staphylococcus aureus               |
| 1500 | Q8WPJ2 | Mytilus edulis                      |
| 1501 | Q27908 | Pinctada fucata                     |
| 1502 | P80513 | Bos taurus                          |
| 1503 | Q53599 | Staphylococcus aureus               |
| 1504 | P30659 | Lutzomyia longipalpis               |
| 1505 | O54082 | Staphylococcus aureus               |
| 1506 | O54081 | Staphylococcus aureus               |
| 1507 | P00705 | Anas platyrhynchos                  |
| 1508 | P00697 | Rattus norvegicus                   |
| 1509 | P00701 | Coturnix coturnix japonica          |
| 1510 | P48816 | Bombyx mori                         |
| 1511 | Q02114 | Bacillus subtilis                   |
| 1512 | Q8L5J1 | Solanum lycopersicum                |
| 1513 | Q4WBS1 | Neosartorya fumigata                |
| 1514 | P55145 | Homo sapiens                        |
| 1515 | P29399 | Alteromonas sp.                     |
| 1516 | P05099 | Gallus gallus                       |
| 1517 | P61870 | Penicillium camembertii             |
| 1518 | Q86Y78 | Homo sapiens                        |
| 1519 | Q1XG90 | Crassostrea virginica               |
| 1520 | P00703 | Meleagris gallopavo                 |
| 1521 | P08905 | Mus musculus                        |
| 1522 | P19401 | Streptococcus pyogenes              |
| 1523 | P16947 | Streptococcus pyogenes serotype M49 |
| 1524 | Q9NL39 | Pinctada maxima                     |
| 1525 | P51529 | Streptomyces lividans               |
| 1526 | P0C0T5 | Escherichia coli                    |
| 1527 | O48540 | Solanum lycopersicum                |
| 1528 | P16699 | Bacillus mannanilyticus             |
| 1529 | O05512 | Bacillus subtilis                   |
| 1530 | Q5U9S1 | Sus scrofa                          |
| 1531 | P52706 | Prunus serotina                     |
| 1532 | P11226 | Homo sapiens                        |
| 1533 | Q7MSJ8 | Wolinella succinogenes              |
| 1534 | P01499 | Apis mellifera                      |
| 1535 | P13113 | Serratia marcescens                 |
| 1536 | Q8C1Q4 | Mus musculus                        |

|      |        |                                      |
|------|--------|--------------------------------------|
| 1537 | Q800Y2 | Argyrosomus regius                   |
| 1538 | O35701 | Mus musculus                         |
| 1539 | Q9XSW3 | Sus scrofa                           |
| 1540 | P01076 | Solanum lycopersicum                 |
| 1541 | C5P3X6 | Coccidioides posadasii               |
| 1542 | P21956 | Mus musculus                         |
| 1543 | P83636 | Orconectes limosus                   |
| 1544 | P0A908 | Escherichia coli                     |
| 1545 | Q70YI1 | Legionella pneumophila               |
| 1546 | P81446 | Viscum album                         |
| 1547 | Q90611 | Gallus gallus                        |
| 1548 | P07507 | Bos taurus                           |
| 1549 | P21741 | Homo sapiens                         |
| 1550 | P28053 | Bos taurus                           |
| 1551 | P33436 | Rattus norvegicus                    |
| 1552 | P09237 | Homo sapiens                         |
| 1553 | P22894 | Homo sapiens                         |
| 1554 | P14780 | Homo sapiens                         |
| 1555 | P55083 | Homo sapiens                         |
| 1556 | P20774 | Homo sapiens                         |
| 1557 | P24052 | Gallus gallus                        |
| 1558 | P45452 | Homo sapiens                         |
| 1559 | P45323 | Haemophilus influenzae               |
| 1560 | P55847 | Penaeus japonicus                    |
| 1561 | P51752 | Coxiella burnetii                    |
| 1562 | P82683 | Viscum album                         |
| 1563 | P01307 | Sus scrofa                           |
| 1564 | P43174 | Ambrosia psilostachya                |
| 1565 | P77348 | Escherichia coli                     |
| 1566 | Q16674 | Homo sapiens                         |
| 1567 | P13087 | Synsepalum dulcificum                |
| 1568 | B0FHH8 | Manduca sexta                        |
| 1569 | P12872 | Homo sapiens                         |
| 1570 | P25289 | Lymnaea stagnalis                    |
| 1571 | P82818 | Bombyx mori                          |
| 1572 | Q8UUG0 | Morone saxatilis                     |
| 1573 | P0A5Q5 | Mycobacterium bovis                  |
| 1574 | Q41260 | Phalaris aquatica                    |
| 1575 | P80090 | Lymnaea stagnalis                    |
| 1576 | Q86LE5 | Rhipicephalus microplus              |
| 1577 | A7VN13 | Protophormia flavoviridis            |
| 1578 | Q8X150 | Gaeumannomyces graminis var. tritici |
| 1579 | P9WIP1 | Mycobacterium tuberculosis           |

|      |        |                                         |
|------|--------|-----------------------------------------|
| 1580 | Q17060 | <i>Apis mellifera</i>                   |
| 1581 | A7VN14 | <i>Protothrips flavoviridis</i>         |
| 1582 | Q9Z4I3 | <i>Treponema maltophilum</i>            |
| 1583 | P37329 | <i>Escherichia coli</i>                 |
| 1584 | Q46203 | <i>Chlamydomonas psittaci</i>           |
| 1585 | P86872 | <i>Pinctada margaritifera</i>           |
| 1586 | Q03011 | <i>Proteus mirabilis</i>                |
| 1587 | A7VN15 | <i>Protothrips flavoviridis</i>         |
| 1588 | P08118 | <i>Homo sapiens</i>                     |
| 1589 | P06597 | <i>Chlamydia trachomatis</i> serovar L2 |
| 1590 | P14946 | <i>Lolium perenne</i>                   |
| 1591 | P9WG65 | <i>Mycobacterium tuberculosis</i>       |
| 1592 | P11590 | <i>Mus musculus</i>                     |
| 1593 | Q59XX2 | <i>Candida albicans</i>                 |
| 1594 | O77061 | <i>Apis mellifera</i>                   |
| 1595 | A0QR29 | <i>Mycobacterium smegmatis</i>          |
| 1596 | P76342 | <i>Escherichia coli</i>                 |
| 1597 | P28665 | <i>Mus musculus</i>                     |
| 1598 | A1BQQ5 | <i>Conus marmoreus</i>                  |
| 1599 | O18330 | <i>Apis mellifera</i>                   |
| 1600 | P39046 | <i>Enterococcus hirae</i>               |
| 1601 | Q13421 | <i>Homo sapiens</i>                     |
| 1602 | O02826 | <i>Sus scrofa</i>                       |
| 1603 | P38577 | <i>Leuconostoc mesenteroides</i>        |
| 1604 | P02761 | <i>Rattus norvegicus</i>                |
| 1605 | Q96DR8 | <i>Homo sapiens</i>                     |
| 1606 | Q99972 | <i>Homo sapiens</i>                     |
| 1607 | Q9BZM5 | <i>Homo sapiens</i>                     |
| 1608 | P01477 | <i>Crotalus oreganus helleri</i>        |
| 1609 | P29241 | <i>Aplysia californica</i>              |
| 1610 | P17050 | <i>Homo sapiens</i>                     |
| 1611 | Q969H8 | <i>Homo sapiens</i>                     |
| 1612 | A5F7A4 | <i>Vibrio cholerae</i> serotype O1      |
| 1613 | P44544 | <i>Haemophilus influenzae</i>           |
| 1614 | P81186 | <i>Desulfovibrio desulfuricans</i>      |
| 1615 | P41271 | <i>Homo sapiens</i>                     |
| 1616 | P86407 | <i>Mesobuthus eupeus</i>                |
| 1617 | Q02083 | <i>Homo sapiens</i>                     |
| 1618 | P33937 | <i>Escherichia coli</i>                 |
| 1619 | P83313 | <i>Opisthophthalmus carinatus</i>       |
| 1620 | P82103 | <i>Mytilus galloprovincialis</i>        |
| 1621 | P82102 | <i>Mytilus galloprovincialis</i>        |
| 1622 | P0ABL3 | <i>Escherichia coli</i>                 |

|      |        |                                                           |
|------|--------|-----------------------------------------------------------|
| 1623 | Q9I596 | <i>Pseudomonas aeruginosa</i>                             |
| 1624 | Q8MTX2 | <i>Opisthacanthus madagascariensis</i>                    |
| 1625 | G8YYA6 | <i>Androctonus amoreuxi</i>                               |
| 1626 | Q94EG3 | <i>Nicotiana langsdorffii</i> x <i>Nicotiana sanderae</i> |
| 1627 | Q7M4T0 | <i>Neurospora crassa</i>                                  |
| 1628 | P33406 | <i>Yersinia enterocolitica</i>                            |
| 1629 | P44654 | <i>Haemophilus influenzae</i>                             |
| 1630 | Q8MMJ7 | <i>Opisthacanthus madagascariensis</i>                    |
| 1631 | P01175 | <i>Bos taurus</i>                                         |
| 1632 | P20068 | <i>Rattus norvegicus</i>                                  |
| 1633 | Q02834 | <i>Micromonospora viridifaciens</i>                       |
| 1634 | F1AWB0 | <i>Vaejovis mexicanus</i>                                 |
| 1635 | P01180 | <i>Bos taurus</i>                                         |
| 1636 | P01185 | <i>Homo sapiens</i>                                       |
| 1637 | Q14112 | <i>Homo sapiens</i>                                       |
| 1638 | G8YYA5 | <i>Androctonus amoreuxi</i>                               |
| 1639 | P46739 | <i>Escherichia coli</i>                                   |
| 1640 | P80188 | <i>Homo sapiens</i>                                       |
| 1641 | Q06006 | <i>Pseudomonas chlororaphis</i>                           |
| 1642 | A0AT32 | <i>Lens culinaris</i>                                     |
| 1643 | Q43871 | <i>Hordeum vulgare</i>                                    |
| 1644 | P39186 | <i>Cupriavidus necator</i>                                |
| 1645 | P0A3R9 | <i>Streptomyces carzinostaticus</i>                       |
| 1646 | P33183 | <i>Sambucus nigra</i>                                     |
| 1647 | Q43767 | <i>Hordeum vulgare</i>                                    |
| 1648 | A0AT29 | <i>Lens culinaris</i>                                     |
| 1649 | P19656 | <i>Zea mays</i>                                           |
| 1650 | C5J887 | <i>Opisthacanthus cayaporum</i>                           |
| 1651 | P10673 | <i>Canis lupus familiaris</i>                             |
| 1652 | P82900 | <i>Triticum aestivum</i>                                  |
| 1653 | Q51705 | <i>Paracoccus denitrificans</i>                           |
| 1654 | P48745 | <i>Homo sapiens</i>                                       |
| 1655 | P24474 | <i>Pseudomonas aeruginosa</i>                             |
| 1656 | Q8MJV4 | <i>Bos taurus</i>                                         |
| 1657 | P01303 | <i>Homo sapiens</i>                                       |
| 1658 | Q84UV8 | <i>Nicotiana langsdorffii</i> x <i>Nicotiana sanderae</i> |
| 1659 | Q9Z0J8 | <i>Rattus norvegicus</i>                                  |
| 1660 | P01183 | <i>Sus scrofa</i>                                         |
| 1661 | P10493 | <i>Mus musculus</i>                                       |
| 1662 | Q9XFS7 | <i>Arabidopsis thaliana</i>                               |
| 1663 | Q7Q7R8 | <i>Anopheles gambiae</i>                                  |

|      |        |                                            |
|------|--------|--------------------------------------------|
| 1664 | Q27441 | <i>Aplysia californica</i>                 |
| 1665 | Q99519 | <i>Homo sapiens</i>                        |
| 1666 | P82007 | <i>Helianthus annuus</i>                   |
| 1667 | Q0IQK9 | <i>Oryza sativa</i> subsp. <i>japonica</i> |
| 1668 | P24296 | <i>Triticum aestivum</i>                   |
| 1669 | P10976 | <i>Spinacia oleracea</i>                   |
| 1670 | P61916 | <i>Homo sapiens</i>                        |
| 1671 | P0ABK9 | <i>Escherichia coli</i>                    |
| 1672 | P94127 | <i>Achromobacter cycloclastes</i>          |
| 1673 | P12670 | <i>Solanum lycopersicum</i>                |
| 1674 | P07808 | <i>Rattus norvegicus</i>                   |
| 1675 | Q9Y2I2 | <i>Homo sapiens</i>                        |
| 1676 | O34313 | <i>Bacillus subtilis</i>                   |
| 1677 | L0DSL2 | <i>Thioalkalivibrio nitratreducens</i>     |
| 1678 | Q6ASY2 | <i>Oryza sativa</i> subsp. <i>japonica</i> |
| 1679 | E6Y8S8 | <i>Apium graveolens</i>                    |
| 1680 | P07597 | <i>Hordeum vulgare</i>                     |
| 1681 | O04004 | <i>Ambrosia artemisiifolia</i>             |
| 1682 | P10975 | <i>Ricinus communis</i>                    |
| 1683 | Q10ST8 | <i>Oryza sativa</i> subsp. <i>japonica</i> |
| 1684 | O97763 | <i>Sus scrofa</i>                          |
| 1685 | Q8MI35 | <i>Sus scrofa</i>                          |
| 1686 | Q9PW68 | <i>Typhlonectes natans</i>                 |
| 1687 | Q9S1E5 | <i>Wolinella succinogenes</i>              |
| 1688 | Q8MP00 | <i>Aedes aegypti</i>                       |
| 1689 | Q62718 | <i>Rattus norvegicus</i>                   |
| 1690 | Q9P121 | <i>Homo sapiens</i>                        |
| 1691 | A2AEP0 | <i>Mus musculus</i>                        |
| 1692 | P31418 | <i>Manduca sexta</i>                       |
| 1693 | P31420 | <i>Manduca sexta</i>                       |
| 1694 | P84838 | <i>Gluconacetobacter diazotrophicus</i>    |
| 1695 | P34171 | <i>Bombyx mori</i>                         |
| 1696 | P34170 | <i>Bombyx mori</i>                         |
| 1697 | F1NSM7 | <i>Gallus gallus</i>                       |
| 1698 | Q04064 | <i>Bordetella pertussis</i>                |
| 1699 | O55232 | <i>Rattus norvegicus</i>                   |
| 1700 | Q8BHP7 | <i>Mus musculus</i>                        |
| 1701 | Q41350 | <i>Solanum lycopersicum</i>                |
| 1702 | B0B815 | <i>Chlamydia trachomatis</i> serovar L2    |
| 1703 | P23515 | <i>Homo sapiens</i>                        |
| 1704 | P34210 | <i>Escherichia coli</i>                    |
| 1705 | P0A915 | <i>Escherichia coli</i>                    |
| 1706 | P33136 | <i>Escherichia coli</i>                    |



|      |        |                                   |
|------|--------|-----------------------------------|
| 1707 | Q588Z2 | Sphingopyxis sp.                  |
| 1708 | P56742 | Crotalus atrox                    |
| 1709 | A8QL58 | Naja atra                         |
| 1710 | P24021 | Aspergillus oryzae                |
| 1711 | O95157 | Homo sapiens                      |
| 1712 | Q9Z0L3 | Mus musculus                      |
| 1713 | Q9S3R9 | Porphyromonas gingivalis          |
| 1714 | P38368 | Haemophilus influenzae            |
| 1715 | Q9XYT4 | Cryptorchestia cavimana           |
| 1716 | P14170 | Nicotiana tabacum                 |
| 1717 | Q60557 | Mesocricetus auratus              |
| 1718 | Q9D3H2 | Mus musculus                      |
| 1719 | Q6UWY5 | Homo sapiens                      |
| 1720 | Q07081 | Lithobates catesbeiana            |
| 1721 | B5AR80 | Bothrops pauloensis               |
| 1722 | J7H670 | Lachesis muta                     |
| 1723 | P26202 | Oryctolagus cuniculus             |
| 1724 | P08878 | Crotalus durissus terrificus      |
| 1725 | P20476 | Trimeresurus gramineus            |
| 1726 | Q2YHJ6 | Trimeresurus puniceus             |
| 1727 | Q7ZTA6 | Crotalus viridis viridis          |
| 1728 | Q6H3C7 | Trimeresurus stejnegeri           |
| 1729 | Q8QG87 | Bothrops insularis                |
| 1730 | P00623 | Crotalus adamanteus               |
| 1731 | P18998 | Crotalus scutulatus scutulatus    |
| 1732 | P62023 | Crotalus scutulatus scutulatus    |
| 1733 | Q2PG81 | Protobothrops elegans             |
| 1734 | P0DJJ9 | Protobothrops flavoviridis        |
| 1735 | P20474 | Bothrops asper                    |
| 1736 | Q1ZY03 | Deinagkistrodon acutus            |
| 1737 | Q2YHJ2 | Trimeresurus borneensis           |
| 1738 | Q9QXX3 | Mus musculus                      |
| 1739 | P24605 | Bothrops asper                    |
| 1740 | P17935 | Vipera ammodytes ammodytes        |
| 1741 | P00615 | Oxyuranus scutellatus scutellatus |
| 1742 | P00616 | Oxyuranus scutellatus scutellatus |
| 1743 | P31419 | Manduca sexta                     |
| 1744 | P29739 | Photobacterium profundum          |
| 1745 | P31096 | Bos taurus                        |
| 1746 | G8XQX1 | Daboia russelii                   |
| 1747 | Q8T113 | Bombyx mori                       |
| 1748 | A2VBC4 | Polybia paulista                  |
| 1749 | A8CG86 | Daboia russelii                   |

|      |        |                                     |
|------|--------|-------------------------------------|
| 1750 | Q7T2R1 | Daboia siamensis                    |
| 1751 | P14424 | Vipera ammodytes ammodytes          |
| 1752 | Q90W39 | Protobothrops mucrosquamatus        |
| 1753 | Q6EER4 | Bothriechis schlegelii              |
| 1754 | Q6H3D6 | Trimeresurus stejnegeri             |
| 1755 | Q6H3D3 | Trimeresurus stejnegeri             |
| 1756 | P80963 | Bothriechis schlegelii              |
| 1757 | O57385 | Deinagkistrodon acutus              |
| 1758 | P81418 | Phytolacca americana                |
| 1759 | Q8WMP9 | Bos taurus                          |
| 1760 | P01299 | Canis lupus familiaris              |
| 1761 | Q3V1G4 | Mus musculus                        |
| 1762 | P25871 | Nicotiana tabacum                   |
| 1763 | P80604 | Pasteurella multocida               |
| 1764 | Q57483 | Haemophilus influenzae              |
| 1765 | Q05811 | Rhizobium leguminosarum bv. viciae  |
| 1766 | Q83EK8 | Coxiella burnetii                   |
| 1767 | Q9S3R8 | Porphyromonas gingivalis            |
| 1768 | P77747 | Escherichia coli                    |
| 1769 | P20740 | Gallus gallus                       |
| 1770 | Q6IWZ0 | Aplysia californica                 |
| 1771 | X2JCV5 | Cerastes cerastes                   |
| 1772 | P31854 | Vipera berus berus                  |
| 1773 | Q8UVU7 | Cerrophidion godmani                |
| 1774 | Q3HLQ4 | Protobothrops mucrosquamatus        |
| 1775 | Q6H3D2 | Trimeresurus stejnegeri             |
| 1776 | Q6H3D5 | Trimeresurus stejnegeri             |
| 1777 | P11657 | Streptococcus mutans                |
| 1778 | Q8NCC3 | Homo sapiens                        |
| 1779 | P13083 | Cavia porcellus                     |
| 1780 | P01301 | Ovis aries                          |
| 1781 | P80603 | Pasteurella multocida               |
| 1782 | P76773 | Escherichia coli                    |
| 1783 | P06111 | Vibrio cholerae serotype O1         |
| 1784 | P13725 | Homo sapiens                        |
| 1785 | P40120 | Escherichia coli                    |
| 1786 | P23843 | Escherichia coli                    |
| 1787 | A8QL52 | Bungarus fasciatus                  |
| 1788 | Q96RQ9 | Homo sapiens                        |
| 1789 | P81383 | Ophiophagus hannah                  |
| 1790 | P21171 | Listeria monocytogenes serovar 1/2a |
| 1791 | P0CAR9 | Cerastes cerastes                   |
| 1792 | P00625 | Ovophis okinavensis                 |

|      |        |                                           |
|------|--------|-------------------------------------------|
| 1793 | A8CG78 | Daboia siamensis                          |
| 1794 | F8QN53 | Vipera renardi                            |
| 1795 | Q6H3D0 | Trimeresurus stejnegeri                   |
| 1796 | Q8JIY9 | Protobothrops jerdonii                    |
| 1797 | A8E2V8 | Trimeresurus gracilis                     |
| 1798 | A8CG90 | Daboia russelii                           |
| 1799 | P24027 | Crotalus durissus terrificus              |
| 1800 | P14555 | Homo sapiens                              |
| 1801 | Q2YHJ9 | Trimeresurus puniceus                     |
| 1802 | Q2YHJ4 | Trimeresurus borneensis                   |
| 1803 | Q8UVZ7 | Crotalus atrox                            |
| 1804 | P31956 | Arthrobacter viscosus                     |
| 1805 | P06875 | Escherichia coli                          |
| 1806 | O64411 | Zea mays                                  |
| 1807 | Q3YJT5 | Solanum tuberosum                         |
| 1808 | Q8WP90 | Solenopsis invicta                        |
| 1809 | P18959 | Manduca sexta                             |
| 1810 | P0AFH8 | Escherichia coli                          |
| 1811 | P08721 | Rattus norvegicus                         |
| 1812 | P83371 | Oncorhynchus keta                         |
| 1813 | P83632 | Galleria mellonella                       |
| 1814 | P23028 | Pseudonaja textilis                       |
| 1815 | Q6H3C8 | Trimeresurus stejnegeri                   |
| 1816 | Q2HZ28 | Bothrops erythromelas                     |
| 1817 | Q8AXY1 | Bothrops jararacussu                      |
| 1818 | B5U6Z2 | Macrovipera lebetina<br>transmediterranea |
| 1819 | Q2YHJ3 | Trimeresurus borneensis                   |
| 1820 | P0DJJ8 | Protobothrops flavoviridis                |
| 1821 | P45881 | Bothrops jararacussu                      |
| 1822 | Q9PTA1 | Bungarus multicinctus                     |
| 1823 | Q6EER2 | Sistrurus catenatus tergeminus            |
| 1824 | Q805A2 | Protobothrops flavoviridis                |
| 1825 | Q90Y77 | Protobothrops flavoviridis                |
| 1826 | P49121 | Agkistrodon contortrix laticinctus        |
| 1827 | G9I930 | Micrurus tener tener                      |
| 1828 | Q6H3D7 | Trimeresurus stejnegeri                   |
| 1829 | P13720 | Escherichia coli                          |
| 1830 | P15399 | Rattus norvegicus                         |
| 1831 | Q95VF0 | Epiphyas postvittana                      |
| 1832 | P0AFI5 | Escherichia coli                          |
| 1833 | P34174 | Bombyx mori                               |
| 1834 | Q47459 | Escherichia coli                          |

|      |        |                             |
|------|--------|-----------------------------|
| 1835 | Q63415 | Rattus norvegicus           |
| 1836 | Q8NBP7 | Homo sapiens                |
| 1837 | Q9NRC9 | Homo sapiens                |
| 1838 | Q28042 | Bos taurus                  |
| 1839 | P26203 | Oryctolagus cuniculus       |
| 1840 | P06859 | Protobothrops flavoviridis  |
| 1841 | D0UGJ0 | Bothrops pauloensis         |
| 1842 | A8CG89 | Daboia russelii             |
| 1843 | Q1RP79 | Vipera nikolskii            |
| 1844 | Q71QE8 | Crotalus viridis viridis    |
| 1845 | A6MEY4 | Bungarus fasciatus          |
| 1846 | P14423 | Rattus norvegicus           |
| 1847 | Q6JK69 | Bothrops atrox              |
| 1848 | P09466 | Homo sapiens                |
| 1849 | P01302 | Bos taurus                  |
| 1850 | C7G1H4 | Lactobacillus plantarum     |
| 1851 | P15478 | Solanum tuberosum           |
| 1852 | P27773 | Mus musculus                |
| 1853 | B5U6Y4 | Echis ocellatus             |
| 1854 | Q09098 | Mus musculus                |
| 1855 | P80964 | Sus scrofa                  |
| 1856 | P20797 | Antheraea polyphemus        |
| 1857 | Q9UKZ9 | Homo sapiens                |
| 1858 | V5NC32 | Agaricus xanthodermus       |
| 1859 | P11598 | Rattus norvegicus           |
| 1860 | Q15084 | Homo sapiens                |
| 1861 | Q95UE8 | Lucilia cuprina             |
| 1862 | P68248 | Gallus gallus               |
| 1863 | P13909 | Bos taurus                  |
| 1864 | P04785 | Rattus norvegicus           |
| 1865 | P30101 | Homo sapiens                |
| 1866 | Q96S96 | Homo sapiens                |
| 1867 | Q95121 | Bos taurus                  |
| 1868 | P15922 | Dickeya chrysanthemi        |
| 1869 | P19136 | Phanerochaete chrysosporium |
| 1870 | Q9N2D3 | Callithrix jacchus          |
| 1871 | P84516 | Sorghum bicolor             |
| 1872 | P10720 | Homo sapiens                |
| 1873 | A8CL69 | Apis mellifera              |
| 1874 | P80284 | Hordeum vulgare             |
| 1875 | P81058 | Litopenaeus vannamei        |
| 1876 | P04073 | Rattus norvegicus           |
| 1877 | Q24825 | Entamoeba histolytica       |

|      |        |                                                                  |
|------|--------|------------------------------------------------------------------|
| 1878 | P86242 | <i>Streptomyces mobaraensis</i>                                  |
| 1879 | P09791 | <i>Trypanosoma brucei brucei</i>                                 |
| 1880 | Q8NBM8 | <i>Homo sapiens</i>                                              |
| 1881 | Q3L1D1 | <i>Agaricus bisporus</i>                                         |
| 1882 | Q3L245 | <i>Leucoagaricus meleagris</i>                                   |
| 1883 | Q03035 | <i>Bordetella bronchiseptica</i>                                 |
| 1884 | Q8W257 | <i>Ptilota filicina</i>                                          |
| 1885 | P35355 | <i>Rattus norvegicus</i>                                         |
| 1886 | Q8NBL1 | <i>Homo sapiens</i>                                              |
| 1887 | Q9GK12 | <i>Camelus dromedarius</i>                                       |
| 1888 | Q8VCS0 | <i>Mus musculus</i>                                              |
| 1889 | O76537 | <i>Trichoplusia ni</i>                                           |
| 1890 | P09102 | <i>Gallus gallus</i>                                             |
| 1891 | P38660 | <i>Mesocricetus auratus</i>                                      |
| 1892 | P91745 | <i>Lucilia cuprina</i>                                           |
| 1893 | P94449 | <i>Bacillus subtilis</i>                                         |
| 1894 | Q02567 | <i>Phanerochaete chrysosporium</i>                               |
| 1895 | P81498 | <i>Suncus murinus</i>                                            |
| 1896 | P00433 | <i>Armoracia rusticana</i>                                       |
| 1897 | O68900 | <i>Escherichia coli</i> O44:H18                                  |
| 1898 | P34095 | <i>Entamoeba histolytica</i>                                     |
| 1899 | P26216 | <i>Zea mays</i>                                                  |
| 1900 | Q01129 | <i>Rattus norvegicus</i>                                         |
| 1901 | O00100 | <i>Aspergillus terreus</i>                                       |
| 1902 | O00092 | <i>Neosartorya fumigata</i>                                      |
| 1903 | P05307 | <i>Bos taurus</i>                                                |
| 1904 | P07237 | <i>Homo sapiens</i>                                              |
| 1905 | Q25255 | <i>Lucilia cuprina</i>                                           |
| 1906 | Q0P9X8 | <i>Campylobacter jejuni</i> subsp. <i>jejuni</i><br>serotype O:2 |
| 1907 | Q01172 | <i>Aspergillus niger</i>                                         |
| 1908 | P22864 | <i>Aspergillus niger</i>                                         |
| 1909 | Q4W1I8 | <i>Zinnia violacea</i>                                           |
| 1910 | P05164 | <i>Homo sapiens</i>                                              |
| 1911 | P07897 | <i>Rattus norvegicus</i>                                         |
| 1912 | Q765P4 | <i>Holotrichia diomphalia</i>                                    |
| 1913 | Q96PD5 | <i>Homo sapiens</i>                                              |
| 1914 | Q9XTN0 | <i>Bombyx mori</i>                                               |
| 1915 | P80109 | <i>Bos taurus</i>                                                |
| 1916 | P28581 | <i>Morganella morganii</i>                                       |
| 1917 | P80463 | <i>Phaseolus lunatus</i>                                         |
| 1918 | P34754 | <i>Aspergillus niger</i>                                         |
| 1919 | Q70LM3 | <i>Phlebia radiata</i>                                           |

|      |        |                                    |
|------|--------|------------------------------------|
| 1920 | P78733 | Phanerochaete chrysosporium        |
| 1921 | P81497 | Suncus murinus                     |
| 1922 | P08176 | Dermatophagoides pteronyssinus     |
| 1923 | P10820 | Mus musculus                       |
| 1924 | Q24824 | Entamoeba histolytica              |
| 1925 | Q00293 | Aspergillus tubingensis            |
| 1926 | P20041 | Ralstonia solanacearum             |
| 1927 | P05117 | Solanum lycopersicum               |
| 1928 | Q6KF82 | Homarus americanus                 |
| 1929 | P11889 | Bacillus cereus                    |
| 1930 | Q56S59 | Nicotiana tabacum                  |
| 1931 | P12273 | Homo sapiens                       |
| 1932 | P20142 | Homo sapiens                       |
| 1933 | Q9XIV8 | Nicotiana tabacum                  |
| 1934 | Q07831 | Entamoeba histolytica              |
| 1935 | P16112 | Homo sapiens                       |
| 1936 | P79208 | Ovis aries                         |
| 1937 | P47853 | Rattus norvegicus                  |
| 1938 | P12943 | Desulfovibrio gigas                |
| 1939 | P81941 | Pseudopleuronectes americanus      |
| 1940 | P02776 | Homo sapiens                       |
| 1941 | O93233 | Gloydius brevicaudus siniticus     |
| 1942 | P82143 | Gloydius brevicaudus siniticus     |
| 1943 | Q9BX93 | Homo sapiens                       |
| 1944 | P96740 | Bacillus subtilis                  |
| 1945 | Q9VYX7 | Drosophila melanogaster            |
| 1946 | Q765P3 | Holotrichia diomphalia             |
| 1947 | Q9GL30 | Bos taurus                         |
| 1948 | Q8NHP8 | Homo sapiens                       |
| 1949 | P24802 | Gallus gallus                      |
| 1950 | Q02809 | Homo sapiens                       |
| 1951 | Q01269 | Pseudomonas aeruginosa             |
| 1952 | Q0TV31 | Clostridium perfringens            |
| 1953 | Q03178 | Saccharomyces cerevisiae           |
| 1954 | P20626 | Corynebacterium pseudotuberculosis |
| 1955 | Q6KF81 | Homarus americanus                 |
| 1956 | Q41015 | Pisum sativum                      |
| 1957 | P49763 | Homo sapiens                       |
| 1958 | Q9PWI4 | Elaphe quadrivirgata               |
| 1959 | A1XRN2 | Atropoides nummifer                |
| 1960 | P81054 | Grifola frondosa                   |
| 1961 | P55058 | Homo sapiens                       |
| 1962 | Q9LLT1 | Juniperus virginiana               |

|      |        |                                                    |
|------|--------|----------------------------------------------------|
| 1963 | P0C1C0 | Pectobacterium carotovorum                         |
| 1964 | P34752 | Aspergillus niger                                  |
| 1965 | P97535 | Rattus norvegicus                                  |
| 1966 | Q9PWI3 | Elaphe quadrivirgata                               |
| 1967 | P82144 | Gloydius brevicaudus siniticus                     |
| 1968 | P18632 | Cryptomeria japonica                               |
| 1969 | Q04681 | Proteus mirabilis                                  |
| 1970 | P21163 | Elizabethkingia miricola                           |
| 1971 | P32722 | Pseudomonas aeruginosa                             |
| 1972 | Q7BS42 | Escherichia coli O44:H18                           |
| 1973 | Q03180 | Saccharomyces cerevisiae                           |
| 1974 | Q8GT41 | Platanus acerifolia                                |
| 1975 | P06867 | Sus scrofa                                         |
| 1976 | P39116 | Bacillus subtilis                                  |
| 1977 | Q6F4C6 | Pinctada fucata                                    |
| 1978 | P05695 | Pseudomonas aeruginosa                             |
| 1979 | P29288 | Rattus norvegicus                                  |
| 1980 | P35483 | Pseudomonas aeruginosa                             |
| 1981 | K4LAH1 | Pseudomonas aeruginosa                             |
| 1982 | P09487 | Bos taurus                                         |
| 1983 | Q10E50 | Oryza sativa subsp. japonica                       |
| 1984 | P21697 | Synechocystis sp.                                  |
| 1985 | P06868 | Bos taurus                                         |
| 1986 | P00747 | Homo sapiens                                       |
| 1987 | P81294 | Juniperus ashei                                    |
| 1988 | P22751 | Dickeya chrysanthemi                               |
| 1989 | P80672 | Campylobacter jejuni subsp. jejuni<br>serotype O:2 |
| 1990 | Q51485 | Pseudomonas aeruginosa                             |
| 1991 | P0AFK9 | Escherichia coli                                   |
| 1992 | P42251 | Bacillus subtilis                                  |
| 1993 | P51740 | Rattus norvegicus                                  |
| 1994 | P08289 | Rattus norvegicus                                  |
| 1995 | Q90ZY0 | Pseudopleuronectes americanus                      |
| 1996 | O57690 | Protophthirus flavoviridis                         |
| 1997 | Q8AYA2 | Bothrops moojeni                                   |
| 1998 | P83326 | Actinidia deliciosa                                |
| 1999 | P38008 | Chlamydia trachomatis                              |
| 2000 | P13686 | Homo sapiens                                       |
| 2001 | P00635 | Saccharomyces cerevisiae                           |
| 2002 | P19406 | Bacillus subtilis                                  |
| 2003 | P35482 | Pseudomonas aeruginosa                             |
| 2004 | P05186 | Homo sapiens                                       |

|      |        |                           |
|------|--------|---------------------------|
| 2005 | Q9TW32 | Dictyostelium discoideum  |
| 2006 | P33579 | Rattus norvegicus         |
| 2007 | Q13162 | Homo sapiens              |
| 2008 | P01239 | Bos taurus                |
| 2009 | P17572 | Meleagris gallopavo       |
| 2010 | P54660 | Dictyostelium discoideum  |
| 2011 | P37726 | Pseudomonas fluorescens   |
| 2012 | Q12546 | Aspergillus ficuum        |
| 2013 | P07102 | Escherichia coli          |
| 2014 | P15693 | Rattus norvegicus         |
| 2015 | P09923 | Homo sapiens              |
| 2016 | P10619 | Homo sapiens              |
| 2017 | P13727 | Homo sapiens              |
| 2018 | P27177 | Gallus gallus             |
| 2019 | P09319 | Oreochromis mossambicus   |
| 2020 | P48096 | Salmo salar               |
| 2021 | Q949Y3 | Arabidopsis thaliana      |
| 2022 | Q01682 | Schizosaccharomyces pombe |
| 2023 | P10163 | Homo sapiens              |
| 2024 | P09318 | Oreochromis mossambicus   |
| 2025 | P58294 | Homo sapiens              |
| 2026 | P81264 | Bos taurus                |
| 2027 | Q09131 | Glycine max               |
| 2028 | P19405 | Bacillus subtilis         |
| 2029 | P19111 | Bos taurus                |
| 2030 | P29523 | Bombyx mori               |
| 2031 | P23284 | Homo sapiens              |
| 2032 | P09585 | Cyprinus carpio           |
| 2033 | P01238 | Sus scrofa                |
| 2034 | Q9HC23 | Homo sapiens              |
| 2035 | P02810 | Homo sapiens              |
| 2036 | P31133 | Escherichia coli          |
| 2037 | P0AFL3 | Escherichia coli          |
| 2038 | P80311 | Bos taurus                |
| 2039 | Q01490 | Orpinomyces sp.           |
| 2040 | P34207 | Rattus norvegicus         |
| 2041 | Q99935 | Homo sapiens              |
| 2042 | P0AFM2 | Escherichia coli          |
| 2043 | P04280 | Homo sapiens              |
| 2044 | P31083 | Synechococcus sp.         |
| 2045 | P35495 | Sus scrofa                |
| 2046 | P35496 | Sus scrofa                |
| 2047 | Q868Z9 | Drosophila melanogaster   |



|      |        |                                      |
|------|--------|--------------------------------------|
| 2048 | P04284 | <i>Solanum lycopersicum</i>          |
| 2049 | P09586 | <i>Mus musculus</i>                  |
| 2050 | P10279 | <i>Bos taurus</i>                    |
| 2051 | P04925 | <i>Mus musculus</i>                  |
| 2052 | P12420 | <i>Equus caballus</i>                |
| 2053 | P01236 | <i>Homo sapiens</i>                  |
| 2054 | P01237 | <i>Rattus norvegicus</i>             |
| 2055 | P81295 | <i>Juniperus ashei</i>               |
| 2056 | P0A402 | <i>Synechococcus elongatus</i>       |
| 2057 | G3XDA8 | <i>Pseudomonas aeruginosa</i>        |
| 2058 | O02853 | <i>Bos taurus</i>                    |
| 2059 | Q95JC9 | <i>Sus scrofa</i>                    |
| 2060 | Q9LD79 | <i>Juniperus virginiana</i>          |
| 2061 | P09489 | <i>Serratia marcescens</i>           |
| 2062 | P11472 | <i>Synechococcus elongatus</i>       |
| 2063 | P0A431 | <i>Thermosynechococcus elongatus</i> |
| 2064 | P02781 | <i>Rattus norvegicus</i>             |
| 2065 | O43653 | <i>Homo sapiens</i>                  |
| 2066 | Q968Z6 | <i>Dictyostelium discoideum</i>      |
| 2067 | P23857 | <i>Escherichia coli</i>              |
| 2068 | P0AG82 | <i>Escherichia coli</i>              |
| 2069 | O76942 | <i>Encephalitozoon cuniculi</i>      |
| 2070 | Q42502 | <i>Solanum tuberosum</i>             |
| 2071 | P01269 | <i>Sus scrofa</i>                    |
| 2072 | P12729 | <i>Dictyostelium discoideum</i>      |
| 2073 | P02782 | <i>Rattus norvegicus</i>             |
| 2074 | P63090 | <i>Rattus norvegicus</i>             |
| 2075 | Q9I194 | <i>Pseudomonas aeruginosa</i>        |
| 2076 | P10549 | <i>Synechocystis</i> sp.             |
| 2077 | Q8DJE2 | <i>Thermosynechococcus elongatus</i> |
| 2078 | P01268 | <i>Bos taurus</i>                    |
| 2079 | P0C8G7 | <i>Pomacea canaliculata</i>          |
| 2080 | Q588Z1 | <i>Sphingopyxis</i> sp.              |
| 2081 | P41222 | <i>Homo sapiens</i>                  |
| 2082 | P01270 | <i>Homo sapiens</i>                  |
| 2083 | P0C8G6 | <i>Pomacea canaliculata</i>          |
| 2084 | Q46444 | <i>Comamonas testosteroni</i>        |
| 2085 | Q8GR64 | <i>Pseudomonas putida</i>            |
| 2086 | P21782 | <i>Bos taurus</i>                    |
| 2087 | P10082 | <i>Homo sapiens</i>                  |
| 2088 | P10631 | <i>Rattus norvegicus</i>             |
| 2089 | Q4W6G0 | <i>Pseudomonas putida</i>            |
| 2090 | P05451 | <i>Homo sapiens</i>                  |

|      |        |                          |
|------|--------|--------------------------|
| 2091 | O09049 | Mus musculus             |
| 2092 | Q99969 | Homo sapiens             |
| 2093 | P86009 | Dromaius novaehollandiae |
| 2094 | Q8WXF3 | Homo sapiens             |
| 2095 | P06281 | Mus musculus             |
| 2096 | P02925 | Escherichia coli         |
| 2097 | Q62703 | Rattus norvegicus        |
| 2098 | P64534 | Escherichia coli         |
| 2099 | P04090 | Homo sapiens             |
| 2100 | P27485 | Sus scrofa               |
| 2101 | P02752 | Gallus gallus            |
| 2102 | Q05186 | Mus musculus             |
| 2103 | P44737 | Haemophilus influenzae   |
| 2104 | P82943 | Bos taurus               |
| 2105 | Q6UW15 | Homo sapiens             |
| 2106 | P01347 | Rattus norvegicus        |
| 2107 | P01348 | Sus scrofa               |
| 2108 | P00797 | Homo sapiens             |
| 2109 | P10745 | Homo sapiens             |
| 2110 | P04916 | Rattus norvegicus        |
| 2111 | Q40772 | Phytolacca americana     |
| 2112 | P24817 | Momordica charantia      |
| 2113 | P20656 | Saponaria officinalis    |
| 2114 | Q8HY17 | Sus scrofa               |
| 2115 | P51456 | Oryctolagus cuniculus    |
| 2116 | Q7SZI7 | Xenopus laevis           |
| 2117 | P06912 | Oryctolagus cuniculus    |
| 2118 | P02879 | Ricinus communis         |
| 2119 | P21326 | Mirabilis jalapa         |
| 2120 | P25031 | Rattus norvegicus        |
| 2121 | Q9BYZ8 | Homo sapiens             |
| 2122 | Q9TRM8 | Canis lupus familiaris   |
| 2123 | P22969 | Equus caballus           |
| 2124 | P02753 | Homo sapiens             |
| 2125 | Q9S8P4 | Pisum sativum            |
| 2126 | P33185 | Bryonia dioica           |
| 2127 | Q5F0I3 | Gynostemma pentaphyllum  |
| 2128 | P10297 | Phytolacca americana     |
| 2129 | P98184 | Bryonia dioica           |
| 2130 | Q00017 | Aspergillus aculeatus    |
| 2131 | Q8RJP2 | Dickeya dadantii         |
| 2132 | P24476 | Dianthus caryophyllus    |
| 2133 | P24478 | Trichosanthes kirilowii  |

|      |        |                          |
|------|--------|--------------------------|
| 2134 | P09989 | Trichosanthes kirilowii  |
| 2135 | P16094 | Momordica charantia      |
| 2136 | Q9HB40 | Homo sapiens             |
| 2137 | P56626 | Trichosanthes anguina    |
| 2138 | Q6EH50 | Phytolacca heterotepala  |
| 2139 | P93543 | Sambucus nigra           |
| 2140 | P61823 | Bos taurus               |
| 2141 | P00655 | Aspergillus giganteus    |
| 2142 | P07998 | Homo sapiens             |
| 2143 | P15468 | Sus scrofa               |
| 2144 | P00652 | Aspergillus clavatus     |
| 2145 | P80022 | Solanum lycopersicum     |
| 2146 | A5HAK0 | Danio rerio              |
| 2147 | P00683 | Mus musculus             |
| 2148 | P67876 | Aspergillus restrictus   |
| 2149 | O80323 | Pyrus pyrifolia          |
| 2150 | P08904 | Bos taurus               |
| 2151 | P11916 | Lithobates catesbeiana   |
| 2152 | P08056 | Rhizopus niveus          |
| 2153 | P10281 | Aspergillus oryzae       |
| 2154 | O86308 | Micrococcus luteus       |
| 2155 | P00669 | Bos taurus               |
| 2156 | P34096 | Homo sapiens             |
| 2157 | P60153 | Homo sapiens             |
| 2158 | P39873 | Bos taurus               |
| 2159 | Q7M438 | Dictyostelium discoideum |
| 2160 | P10282 | Gibberella fujikuroi     |
| 2161 | P00684 | Rattus norvegicus        |
| 2162 | P83618 | Panax ginseng            |
| 2163 | P10153 | Homo sapiens             |
| 2164 | P21338 | Escherichia coli         |
| 2165 | P00651 | Aspergillus oryzae       |
| 2166 | P42813 | Arabidopsis thaliana     |
| 2167 | Q9PVW8 | Silurus asotus           |
| 2168 | Q04672 | Glycine max              |
| 2169 | Q4TUA4 | Mesobuthus martensii     |
| 2170 | P23389 | Bos taurus               |
| 2171 | Q9BZR6 | Homo sapiens             |
| 2172 | P02739 | Neovison vison           |
| 2173 | P19708 | Canis lupus familiaris   |
| 2174 | P81608 | Sus scrofa               |
| 2175 | Q8FDW4 | Escherichia coli O6:H1   |
| 2176 | Q86SC0 | Oryctes rhinoceros       |

|      |        |                                                        |
|------|--------|--------------------------------------------------------|
| 2177 | O35314 | <i>Rattus norvegicus</i>                               |
| 2178 | P15223 | <i>Centruroides noxius</i>                             |
| 2179 | P56611 | <i>Tityus bahiensis</i>                                |
| 2180 | P60212 | <i>Tityus obscurus</i>                                 |
| 2181 | Q7YXD3 | <i>Androctonus mauritanicus</i><br><i>mauritanicus</i> |
| 2182 | P05366 | <i>Mus musculus</i>                                    |
| 2183 | P0DJI8 | <i>Homo sapiens</i>                                    |
| 2184 | P35541 | <i>Bos taurus</i>                                      |
| 2185 | P02743 | <i>Homo sapiens</i>                                    |
| 2186 | P16933 | <i>Schizophyllum commune</i>                           |
| 2187 | Q9UAC8 | <i>Mesobuthus martensii</i>                            |
| 2188 | C9X4K7 | <i>Tityus discrepans</i>                               |
| 2189 | Q8RUW5 | <i>Arabidopsis thaliana</i>                            |
| 2190 | B7SNV8 | <i>Parabuthus granulatus</i>                           |
| 2191 | B7JAQ0 | <i>Acidithiobacillus ferrooxidans</i>                  |
| 2192 | P19707 | <i>Felis catus</i>                                     |
| 2193 | Q04791 | <i>Anas platyrhynchos</i>                              |
| 2194 | Q9UAC9 | <i>Mesobuthus martensii</i>                            |
| 2195 | Q9SW93 | <i>Lilium longiflorum</i>                              |
| 2196 | Q9NBW2 | <i>Mesobuthus martensii</i>                            |
| 2197 | P05060 | <i>Homo sapiens</i>                                    |
| 2198 | C9X4J9 | <i>Tityus discrepans</i>                               |
| 2199 | C9X4K1 | <i>Tityus discrepans</i>                               |
| 2200 | P45662 | <i>Centruroides noxius</i>                             |
| 2201 | P60215 | <i>Tityus obscurus</i>                                 |
| 2202 | Q8WRY4 | <i>Centruroides limpidus limpidus</i>                  |
| 2203 | Q5D710 | <i>Scylla serrata</i>                                  |
| 2204 | O34344 | <i>Bacillus subtilis</i>                               |
| 2205 | P31532 | <i>Mus musculus</i>                                    |
| 2206 | P02740 | <i>Anas platyrhynchos</i>                              |
| 2207 | P07602 | <i>Homo sapiens</i>                                    |
| 2208 | P31226 | <i>Lithobates catesbeiana</i>                          |
| 2209 | Q86SE1 | <i>Androctonus amoreuxi</i>                            |
| 2210 | Q5MJP5 | <i>Anuroctonus phaiodactylus</i>                       |
| 2211 | P45697 | <i>Mesobuthus martensii</i>                            |
| 2212 | P56612 | <i>Tityus stigmurus</i>                                |
| 2213 | P01484 | <i>Androctonus australis</i>                           |
| 2214 | P01480 | <i>Androctonus australis</i>                           |
| 2215 | P17728 | <i>Leiurus quinquestriatus hebraeus</i>                |
| 2216 | P22629 | <i>Streptomyces avidinii</i>                           |
| 2217 | P22340 | <i>Salmonella typhimurium</i>                          |
| 2218 | P01492 | <i>Centruroides sculpturatus</i>                       |

|      |        |                                  |
|------|--------|----------------------------------|
| 2219 | Q2NME3 | Tityus zulianus                  |
| 2220 | B7FDP2 | Centruroides suffusus suffusus   |
| 2221 | P84693 | Tityus obscurus                  |
| 2222 | P84685 | Tityus obscurus                  |
| 2223 | O61705 | Mesobuthus martensii             |
| 2224 | P01491 | Centruroides sculpturatus        |
| 2225 | P29457 | Rattus norvegicus                |
| 2226 | P13430 | Escherichia coli O6:K15:H31      |
| 2227 | P02784 | Bos taurus                       |
| 2228 | O46162 | Schistocerca gregaria            |
| 2229 | Q7Z0H4 | Mesobuthus martensii             |
| 2230 | P01495 | Centruroides noxius              |
| 2231 | Q86SD9 | Androctonus amoreuxi             |
| 2232 | P01494 | Centruroides sculpturatus        |
| 2233 | P60213 | Tityus obscurus                  |
| 2234 | P45658 | Androctonus australis            |
| 2235 | P84688 | Tityus obscurus                  |
| 2236 | O76192 | Galleria mellonella              |
| 2237 | O95968 | Homo sapiens                     |
| 2238 | Q6XE38 | Homo sapiens                     |
| 2239 | O52057 | Allochromatium vinosum           |
| 2240 | Q5HEA4 | Staphylococcus aureus            |
| 2241 | P0C175 | Tityus serrulatus                |
| 2242 | C9X4J8 | Tityus discrepans                |
| 2243 | P01479 | Androctonus australis            |
| 2244 | Q86SE0 | Androctonus amoreuxi             |
| 2245 | P01493 | Centruroides sculpturatus        |
| 2246 | O77463 | Tityus serrulatus                |
| 2247 | Q96HF1 | Homo sapiens                     |
| 2248 | Q6UW10 | Homo sapiens                     |
| 2249 | P42579 | Lymnaea stagnalis                |
| 2250 | P01497 | Androctonus australis            |
| 2251 | O61668 | Mesobuthus martensii             |
| 2252 | P15147 | Androctonus australis            |
| 2253 | Q26292 | Leiurus quinquestriatus hebraeus |
| 2254 | Q56TT9 | Hottentotta judaicus             |
| 2255 | C9X4K4 | Tityus discrepans                |
| 2256 | O75711 | Homo sapiens                     |
| 2257 | P60214 | Tityus obscurus                  |
| 2258 | P0DMM8 | Tityus trivittatus               |
| 2259 | Q9S1G7 | Thauera selenatis                |
| 2260 | P04557 | Bos taurus                       |
| 2261 | P81019 | Bos taurus                       |

|      |        |                                                |
|------|--------|------------------------------------------------|
| 2262 | P06908 | <i>Canis lupus familiaris</i>                  |
| 2263 | P02780 | <i>Rattus norvegicus</i>                       |
| 2264 | O52179 | <i>Allochroa matium vinosum</i>                |
| 2265 | Q9Z4N3 | <i>Salmonella typhimurium</i>                  |
| 2266 | Q6X5T3 | <i>Bitis arietans</i>                          |
| 2267 | Q56EB1 | <i>Bothrops jararaca</i>                       |
| 2268 | Q8AV98 | <i>Protophrops flavoviridis</i>                |
| 2269 | P35823 | <i>Aeromonas salmonicida</i>                   |
| 2270 | Q7T045 | <i>Macrovipera lebetina</i>                    |
| 2271 | Q8VSL2 | <i>Shigella flexneri</i>                       |
| 2272 | Q8N474 | <i>Homo sapiens</i>                            |
| 2273 | P04148 | <i>Bombyx mori</i>                             |
| 2274 | Q28862 | <i>Bos taurus</i>                              |
| 2275 | G4V4F9 | <i>Cupiennius salei</i>                        |
| 2276 | P0A1Z2 | <i>Salmonella typhimurium</i>                  |
| 2277 | Q56EB0 | <i>Bothrops jararaca</i>                       |
| 2278 | Q9YI92 | <i>Gloydus blomhoffii</i>                      |
| 2279 | Q9DEA1 | <i>Deinagkistrodon acutus</i>                  |
| 2280 | W5XCJ6 | <i>Macrovipera lebetina</i>                    |
| 2281 | E2DQZ5 | <i>Protophrops jerdonii</i>                    |
| 2282 | Q4PRD1 | <i>Daboia siamensis</i>                        |
| 2283 | P0AGC3 | <i>Escherichia coli</i>                        |
| 2284 | P60042 | <i>Rattus norvegicus</i>                       |
| 2285 | Q92765 | <i>Homo sapiens</i>                            |
| 2286 | P35248 | <i>Rattus norvegicus</i>                       |
| 2287 | O52055 | <i>Allochroa matium vinosum</i>                |
| 2288 | P19855 | <i>Leiurus quinquestriatus quinquestriatus</i> |
| 2289 | P56637 | <i>Hottentotta judaicus</i>                    |
| 2290 | P0AEU7 | <i>Escherichia coli</i>                        |
| 2291 | Q9SU40 | <i>Arabidopsis thaliana</i>                    |
| 2292 | P23806 | <i>Protophrops flavoviridis</i>                |
| 2293 | P38538 | <i>Brevibacillus choshinensis</i>              |
| 2294 | P09333 | <i>Brevibacillus brevis</i>                    |
| 2295 | O93427 | <i>Crotalus durissus terrificus</i>            |
| 2296 | Q9YGN4 | <i>Gloydus brevicaudus</i>                     |
| 2297 | W5XDM0 | <i>Macrovipera lebetina</i>                    |
| 2298 | Q8KIL1 | <i>Gluconobacter thailandicus</i>              |
| 2299 | P03973 | <i>Homo sapiens</i>                            |
| 2300 | P01245 | <i>Equus caballus</i>                          |
| 2301 | P01241 | <i>Homo sapiens</i>                            |
| 2302 | Q96QR1 | <i>Homo sapiens</i>                            |
| 2303 | P15196 | <i>Oryctolagus cuniculus</i>                   |

|      |        |                            |
|------|--------|----------------------------|
| 2304 | P24336 | Hottentotta judaicus       |
| 2305 | E2DQZ6 | Protobothrops jerdonii     |
| 2306 | Q4PRD2 | Daboia siamensis           |
| 2307 | P97430 | Mus musculus               |
| 2308 | I7ICN3 | Bitis rhinoceros           |
| 2309 | P01242 | Homo sapiens               |
| 2310 | P08899 | Anguilla japonica          |
| 2311 | P01248 | Sus scrofa                 |
| 2312 | Q8KDM7 | Chlorobium tepidum         |
| 2313 | O75556 | Homo sapiens               |
| 2314 | P81238 | Rhodobacter sphaeroides    |
| 2315 | O62605 | Galleria mellonella        |
| 2316 | Q9XY87 | Mesobuthus martensii       |
| 2317 | Q8AV97 | Protobothrops flavoviridis |
| 2318 | P38059 | Lactobacillus helveticus   |
| 2319 | Q9YGG9 | Gloydus blomhoffii         |
| 2320 | D1MGU0 | Protobothrops jerdonii     |
| 2321 | Q9DEA2 | Deinagkistrodon acutus     |
| 2322 | P0A3V1 | Bacillus cereus            |
| 2323 | Q696W1 | Macrovipera lebetina       |
| 2324 | P02814 | Homo sapiens               |
| 2325 | P00446 | Photobacterium leiognathi  |
| 2326 | Q7TMF5 | Mus musculus               |
| 2327 | P29392 | Bos taurus                 |
| 2328 | P16225 | Sus scrofa                 |
| 2329 | P04278 | Homo sapiens               |
| 2330 | Q15465 | Homo sapiens               |
| 2331 | P55000 | Homo sapiens               |
| 2332 | Q9I840 | Calloselasma rhodostoma    |
| 2333 | D7UQ40 | Alternaria solani          |
| 2334 | P01246 | Bos taurus                 |
| 2335 | P21919 | Gadus morhua               |
| 2336 | D7A6E5 | Starkeya novella           |
| 2337 | P07759 | Mus musculus               |
| 2338 | P0C0J0 | Streptococcus pyogenes     |
| 2339 | P09486 | Homo sapiens               |
| 2340 | P23807 | Protobothrops flavoviridis |
| 2341 | P49051 | Bacillus anthracis         |
| 2342 | Q38L02 | Daboia siamensis           |
| 2343 | Q7T2Q0 | Echis multisquamatus       |
| 2344 | P01170 | Lophius americanus         |
| 2345 | P15453 | Brucella abortus biovar 1  |
| 2346 | P34745 | Ictalurus punctatus        |

|      |        |                                 |
|------|--------|---------------------------------|
| 2347 | P51688 | Homo sapiens                    |
| 2348 | O43278 | Homo sapiens                    |
| 2349 | P43131 | Brevibacillus choshinensis      |
| 2350 | Q2FXC2 | Staphylococcus aureus           |
| 2351 | Q2FXC4 | Staphylococcus aureus           |
| 2352 | Q2FXC8 | Staphylococcus aureus           |
| 2353 | O93426 | Crotalus durissus terrificus    |
| 2354 | Q9YGN5 | Gloydus brevicaudus             |
| 2355 | Q8JGT6 | Protopharyngodon marmoratus     |
| 2356 | I7JUQ0 | Bitis rhinoceros                |
| 2357 | Q9IAM1 | Deinagkistrodon acutus          |
| 2358 | Q82S91 | Nitrosomonas europaea           |
| 2359 | P0AGD1 | Escherichia coli                |
| 2360 | P10813 | Lithobates catesbeiana          |
| 2361 | O33434 | Paracoccus pantotrophus         |
| 2362 | Q939U1 | Rhodovulum sulfidophilum        |
| 2363 | Q9NAX4 | Dictyostelium discoideum        |
| 2364 | B9A8D7 | Crassostrea virginica           |
| 2365 | P36233 | Oryctolagus cuniculus           |
| 2366 | P16975 | Rattus norvegicus               |
| 2367 | Q966V2 | Halocynthia roretzi             |
| 2368 | P77754 | Escherichia coli                |
| 2369 | P09350 | Physarum polycephalum           |
| 2370 | P01006 | Streptomyces albogriseolus      |
| 2371 | Q3UN54 | Mus musculus                    |
| 2372 | P13432 | Rattus norvegicus               |
| 2373 | P01168 | Sus scrofa                      |
| 2374 | Q8MP06 | Tyria jacobaeae                 |
| 2375 | P10607 | Oncorhynchus kisutch            |
| 2376 | P34746 | Oreochromis mossambicus         |
| 2377 | P67930 | Ovis aries                      |
| 2378 | P20362 | Paralichthys olivaceus          |
| 2379 | Q8RLX0 | Chlorobaculum thiosulfatophilum |
| 2380 | P06654 | Streptococcus sp. group G       |
| 2381 | Q8CEK3 | Mus musculus                    |
| 2382 | P08375 | Sarcophaga peregrina            |
| 2383 | P10298 | Cyprinus carpio                 |
| 2384 | P33093 | Macaca mulatta                  |
| 2385 | Q9BQB4 | Homo sapiens                    |
| 2386 | P15270 | Dictyostelium discoideum        |
| 2387 | P20112 | Sus scrofa                      |
| 2388 | P10124 | Homo sapiens                    |
| 2389 | Q6X4U4 | Homo sapiens                    |



|      |        |                                                  |
|------|--------|--------------------------------------------------|
| 2390 | Q08IS0 | Hydrogenophilus thermoluteolus                   |
| 2391 | Q9TTE1 | Bos taurus                                       |
| 2392 | P22323 | Cavia porcellus                                  |
| 2393 | P05545 | Rattus norvegicus                                |
| 2394 | P50470 | Streptococcus pyogenes serotype M1               |
| 2395 | P23061 | Choristoneura biennis<br>entomopoxvirus          |
| 2396 | Q2FXC3 | Staphylococcus aureus                            |
| 2397 | Q27967 | Bos taurus                                       |
| 2398 | Q55025 | Synechococcus elongatus                          |
| 2399 | P83544 | Streptomyces mobaraensis                         |
| 2400 | P61153 | Streptomyces lividans                            |
| 2401 | P02808 | Homo sapiens                                     |
| 2402 | P18417 | Catharanthus roseus                              |
| 2403 | P02906 | Salmonella typhimurium                           |
| 2404 | P04189 | Bacillus subtilis                                |
| 2405 | B3STN7 | Nosema bombycis                                  |
| 2406 | Q8NKX2 | Streptococcus pyogenes serotype<br>M18           |
| 2407 | Q30HU9 | Crassostrea virginica                            |
| 2408 | Q05894 | Heliothis armigera entomopoxvirus                |
| 2409 | P07214 | Mus musculus                                     |
| 2410 | Q2FZL3 | Staphylococcus aureus                            |
| 2411 | P02783 | Rattus norvegicus                                |
| 2412 | Q90WJ9 | Takifugu pardalis                                |
| 2413 | Q8T9R8 | Stomoxys calcitrans                              |
| 2414 | P35706 | Streptomyces longisporus                         |
| 2415 | P52823 | Homo sapiens                                     |
| 2416 | P0AG78 | Escherichia coli                                 |
| 2417 | Q8NBK3 | Homo sapiens                                     |
| 2418 | P0ABZ6 | Escherichia coli                                 |
| 2419 | P07767 | Staphylococcus aureus                            |
| 2420 | P00779 | Streptococcus dysgalactiae subsp.<br>equisimilis |
| 2421 | P53616 | Saccharomyces cerevisiae                         |
| 2422 | B3STN5 | Nosema bombycis                                  |
| 2423 | E7CLP2 | Rhopalurus junceus                               |
| 2424 | P23564 | Paenibacillus alvei                              |
| 2425 | Q9U8X3 | Tachypleus tridentatus                           |
| 2426 | P0C2E9 | Clostridium perfringens                          |
| 2427 | Q3YBN2 | Mesocricetus auratus                             |
| 2428 | Q06987 | Neisseria meningitidis serogroup B               |
| 2429 | P25068 | Bos taurus                                       |

|      |        |                                    |
|------|--------|------------------------------------|
| 2430 | P13385 | Homo sapiens                       |
| 2431 | Q7Z0T3 | Aplysia californica                |
| 2432 | P05452 | Homo sapiens                       |
| 2433 | Q5D231 | Illawarra wisharti                 |
| 2434 | P78581 | Aspergillus oryzae                 |
| 2435 | Q27270 | Tenebrio molitor                   |
| 2436 | P0ADA1 | Escherichia coli                   |
| 2437 | P04155 | Homo sapiens                       |
| 2438 | P14214 | Tachypleus tridentatus             |
| 2439 | P24821 | Homo sapiens                       |
| 2440 | P14213 | Tachypleus tridentatus             |
| 2441 | P10646 | Homo sapiens                       |
| 2442 | Q9XSC9 | Bos taurus                         |
| 2443 | P20062 | Homo sapiens                       |
| 2444 | Q07654 | Homo sapiens                       |
| 2445 | P01544 | Triticum aestivum                  |
| 2446 | Q9NBW4 | Theromyzon tessulatum              |
| 2447 | P27477 | Synechococcus elongatus            |
| 2448 | Q9VMD9 | Drosophila melanogaster            |
| 2449 | Q06988 | Neisseria meningitidis serogroup B |
| 2450 | E1VBK1 | Halomonas elongata                 |
| 2451 | Q9YH85 | Gallus gallus                      |
| 2452 | O08523 | Mus musculus                       |
| 2453 | P01359 | Sus scrofa                         |
| 2454 | Q6T6C2 | Theromyzon tessulatum              |
| 2455 | Q9U8W7 | Tachypleus tridentatus             |
| 2456 | Q5EPH2 | Rhipicephalus bursa                |
| 2457 | P15242 | Rattus norvegicus                  |
| 2458 | Q9UVI4 | Claviceps fusiformis               |
| 2459 | P01830 | Rattus norvegicus                  |
| 2460 | P16035 | Homo sapiens                       |
| 2461 | P16368 | Bos taurus                         |
| 2462 | P27654 | Saccharomyces cerevisiae           |
| 2463 | P0A855 | Escherichia coli                   |
| 2464 | P48307 | Homo sapiens                       |
| 2465 | P05543 | Homo sapiens                       |
| 2466 | Q8GTB6 | Cannabis sativa                    |
| 2467 | Q6T6C1 | Theromyzon tessulatum              |
| 2468 | P01538 | Viscum album                       |
| 2469 | P01545 | Hordeum vulgare                    |
| 2470 | P01543 | Triticum aestivum                  |
| 2471 | P01831 | Mus musculus                       |
| 2472 | Q92563 | Homo sapiens                       |

|      |        |                                            |
|------|--------|--------------------------------------------|
| 2473 | P31110 | <i>Oryza sativa</i> subsp. <i>japonica</i> |
| 2474 | P50694 | <i>Prunus avium</i>                        |
| 2475 | O95407 | <i>Homo sapiens</i>                        |
| 2476 | P42705 | <i>Canis lupus familiaris</i>              |
| 2477 | P35625 | <i>Homo sapiens</i>                        |
| 2478 | Q5JIZ5 | <i>Thermococcus kodakarensis</i>           |
| 2479 | P02789 | <i>Gallus gallus</i>                       |
| 2480 | P02787 | <i>Homo sapiens</i>                        |
| 2481 | P24627 | <i>Bos taurus</i>                          |
| 2482 | P14632 | <i>Sus scrofa</i>                          |
| 2483 | Q9XD84 | <i>Escherichia coli</i> O78:H11            |
| 2484 | Q9U8W8 | <i>Tachypleus tridentatus</i>              |
| 2485 | P81370 | <i>Actinidia deliciosa</i>                 |
| 2486 | Q8MMG9 | <i>Pimpla hypochondriaca</i>               |
| 2487 | P01033 | <i>Homo sapiens</i>                        |
| 2488 | P30120 | <i>Rattus norvegicus</i>                   |
| 2489 | P26652 | <i>Gallus gallus</i>                       |
| 2490 | Q9GZM7 | <i>Homo sapiens</i>                        |
| 2491 | O80327 | <i>Pyrus pyrifolia</i>                     |
| 2492 | P11439 | <i>Pseudomonas aeruginosa</i>              |
| 2493 | O14798 | <i>Homo sapiens</i>                        |
| 2494 | P38683 | <i>Escherichia coli</i>                    |
| 2495 | P00750 | <i>Homo sapiens</i>                        |
| 2496 | O00300 | <i>Homo sapiens</i>                        |
| 2497 | P80426 | <i>Salmo salar</i>                         |
| 2498 | P19134 | <i>Oryctolagus cuniculus</i>               |
| 2499 | P02788 | <i>Homo sapiens</i>                        |
| 2500 | P08582 | <i>Homo sapiens</i>                        |
| 2501 | Q02942 | <i>Blaberus discoidalis</i>                |
| 2502 | P22297 | <i>Manduca sexta</i>                       |
| 2503 | P00760 | <i>Bos taurus</i>                          |
| 2504 | O14773 | <i>Homo sapiens</i>                        |
| 2505 | D3RVD4 | <i>Allochromatium vinosum</i>              |
| 2506 | O55245 | <i>Crocodylus porosus</i>                  |
| 2507 | P31779 | <i>Lithobates catesbeiana</i>              |
| 2508 | P55955 | <i>Caenorhabditis elegans</i>              |
| 2509 | Q4LCS9 | <i>Androctonus australis</i>               |
| 2510 | O46167 | <i>Eratigena agrestis</i>                  |
| 2511 | I6S7G5 | <i>Scolopendra mutilans</i>                |
| 2512 | P12346 | <i>Rattus norvegicus</i>                   |
| 2513 | Q26643 | <i>Sarcophaga peregrina</i>                |
| 2514 | P35441 | <i>Mus musculus</i>                        |
| 2515 | Q05895 | <i>Mus musculus</i>                        |

|      |        |                                     |
|------|--------|-------------------------------------|
| 2516 | Q924B5 | <i>Rattus norvegicus</i>            |
| 2517 | I6RU32 | <i>Scolopendra mutilans</i>         |
| 2518 | P02767 | <i>Rattus norvegicus</i>            |
| 2519 | P58912 | <i>Phyllodiscus semoni</i>          |
| 2520 | Q08127 | <i>Anguilla anguilla</i>            |
| 2521 | P01222 | <i>Homo sapiens</i>                 |
| 2522 | P02766 | <i>Homo sapiens</i>                 |
| 2523 | E7BLC7 | <i>Androctonus crassicauda</i>      |
| 2524 | C0K3N1 | <i>Bitis arietans</i>               |
| 2525 | P37240 | <i>Oncorhynchus mykiss</i>          |
| 2526 | P01224 | <i>Sus scrofa</i>                   |
| 2527 | O46654 | <i>Sorex araneus</i>                |
| 2528 | P49125 | <i>Latrodectus tredecimguttatus</i> |
| 2529 | I6RA76 | <i>Scolopendra mutilans</i>         |
| 2530 | P0DMD3 | <i>Scolopendra mutilans</i>         |
| 2531 | P01223 | <i>Bos taurus</i>                   |
| 2532 | P49141 | <i>Monodelphis domestica</i>        |
| 2533 | A9Q0M7 | <i>Streptococcus uberis</i>         |
| 2534 | P98066 | <i>Homo sapiens</i>                 |
| 2535 | Q9JMI7 | <i>Mus musculus</i>                 |
| 2536 | Q4LCS8 | <i>Androctonus australis</i>        |
| 2537 | O95881 | <i>Homo sapiens</i>                 |
| 2538 | I6S390 | <i>Scolopendra mutilans</i>         |
| 2539 | Q9RU24 | <i>Deinococcus radiodurans</i>      |
| 2540 | Q09140 | <i>Schizosaccharomyces pombe</i>    |
| 2541 | P27731 | <i>Gallus gallus</i>                |
| 2542 | Q29616 | <i>Macropus giganteus</i>           |
| 2543 | B7ZS96 | <i>Xenopus laevis</i>               |
| 2544 | G5ED35 | <i>Caenorhabditis elegans</i>       |
| 2545 | I6S7I0 | <i>Scolopendra mutilans</i>         |
| 2546 | P67861 | <i>Daboia russelii</i>              |
| 2547 | Q03405 | <i>Homo sapiens</i>                 |
| 2548 | P00749 | <i>Homo sapiens</i>                 |
| 2549 | P07024 | <i>Escherichia coli</i>             |
| 2550 | P11684 | <i>Homo sapiens</i>                 |
| 2551 | Q09332 | <i>Drosophila melanogaster</i>      |
| 2552 | P81828 | <i>Rattus norvegicus</i>            |
| 2553 | P21814 | <i>Ovis aries</i>                   |
| 2554 | Q99ML8 | <i>Mus musculus</i>                 |
| 2555 | Q9JLA3 | <i>Rattus norvegicus</i>            |
| 2556 | P35777 | <i>Solenopsis invicta</i>           |
| 2557 | Q47706 | <i>Escherichia coli</i>             |
| 2558 | P19425 | <i>Aedes aegypti</i>                |

|      |        |                                    |
|------|--------|------------------------------------|
| 2559 | P83234 | Ophiophagus hannah                 |
| 2560 | Q28388 | Equus caballus                     |
| 2561 | Q48245 | Helicobacter pylori                |
| 2562 | P15691 | Bos taurus                         |
| 2563 | Q16927 | Aedes aegypti                      |
| 2564 | C1IC50 | Walterinnesia aegyptia             |
| 2565 | P02779 | Oryctolagus cuniculus              |
| 2566 | Q6UXB2 | Homo sapiens                       |
| 2567 | Q6T6T5 | Bitis gabonica                     |
| 2568 | B2G331 | Heteractis crispa                  |
| 2569 | Q90WA1 | Pseudonaja textilis textilis       |
| 2570 | Q9Z0K8 | Mus musculus                       |
| 2571 | P35775 | Solenopsis invicta                 |
| 2572 | P35759 | Polistes exclamans                 |
| 2573 | Q6RG02 | Fenneropenaeus merguensis          |
| 2574 | C1IC53 | Walterinnesia aegyptia             |
| 2575 | P0C1X2 | Conus striatus                     |
| 2576 | B2KTG1 | Bungarus fasciatus                 |
| 2577 | P86870 | Vespa magnifica                    |
| 2578 | P68638 | Vaccinia virus                     |
| 2579 | P00992 | Vipera ammodytes ammodytes         |
| 2580 | Q7Z5L0 | Homo sapiens                       |
| 2581 | P02774 | Homo sapiens                       |
| 2582 | P22458 | Oryctolagus cuniculus              |
| 2583 | P22865 | Lactococcus lactis subsp. cremoris |
| 2584 | P0DL40 | Vespa magnifica                    |
| 2585 | Q589G4 | Anoplius samariensis               |
| 2586 | B1B5I8 | Stichodactyla haddoni              |
| 2587 | A8Y7P1 | Daboia siamensis                   |
| 2588 | P00987 | Bungarus multicinctus              |
| 2589 | P00989 | Bungarus multicinctus              |
| 2590 | O64392 | Triticum aestivum                  |
| 2591 | P35778 | Solenopsis invicta                 |
| 2592 | P84843 | Hybomitra bimaculata               |
| 2593 | I2C090 | Ophiophagus hannah                 |
| 2594 | P16612 | Rattus norvegicus                  |
| 2595 | C1IC52 | Walterinnesia aegyptia             |
| 2596 | B6RLX2 | Ophiophagus hannah                 |
| 2597 | Q7T2Q6 | Bungarus flaviceps flaviceps       |
| 2598 | B7S4N9 | Oxyuranus scutellatus scutellatus  |
| 2599 | Q8WQK0 | Cotesia rubecula                   |
| 2600 | O70280 | Rattus norvegicus                  |
| 2601 | Q09022 | Xenopus laevis                     |

|      |        |                                               |
|------|--------|-----------------------------------------------|
| 2602 | A2SY66 | <i>Vicia sativa</i> subsp. <i>nigra</i>       |
| 2603 | P00991 | <i>Vipera ammodytes ammodytes</i>             |
| 2604 | Q6T6S5 | <i>Bitis gabonica</i>                         |
| 2605 | Q90WA0 | <i>Pseudonaja textilis textilis</i>           |
| 2606 | P21614 | <i>Mus musculus</i>                           |
| 2607 | P01174 | <i>Rattus norvegicus</i>                      |
| 2608 | Q9UBD3 | <i>Homo sapiens</i>                           |
| 2609 | P33557 | <i>Aspergillus kawachii</i>                   |
| 2610 | P07529 | <i>Cryptococcus albidus</i>                   |
| 2611 | P42660 | <i>Aedes aegypti</i>                          |
| 2612 | P49767 | <i>Homo sapiens</i>                           |
| 2613 | P29788 | <i>Mus musculus</i>                           |
| 2614 | P04275 | <i>Homo sapiens</i>                           |
| 2615 | K7XWG4 | Rat cytomegalovirus                           |
| 2616 | O76076 | <i>Homo sapiens</i>                           |
| 2617 | Q53NL5 | <i>Oryza sativa</i> subsp. <i>japonica</i>    |
| 2618 | P37387 | <i>Escherichia coli</i>                       |
| 2619 | Q9HGE1 | <i>Humicola grisea</i> var. <i>thermoidea</i> |
| 2620 | P02896 | <i>Trypanosoma brucei brucei</i>              |
| 2621 | P48819 | <i>Sus scrofa</i>                             |
| 2622 | Q7TQN3 | <i>Mus musculus</i>                           |
| 2623 | Q76BW5 | <i>Oryza sativa</i> subsp. <i>japonica</i>    |
| 2624 | A4QD57 | <i>Corynebacterium glutamicum</i>             |
| 2625 | O46655 | <i>Sus scrofa</i>                             |
| 2626 | O64393 | <i>Triticum aestivum</i>                      |
| 2627 | Q8L5C6 | <i>Triticum aestivum</i>                      |
| 2628 | Q6YDN9 | <i>Brassica oleracea</i> var. <i>botrytis</i> |
| 2629 | P23030 | <i>Cellvibrio japonicus</i>                   |
| 2630 | P35811 | <i>Fibrobacter succinogenes</i>               |
| 2631 | P04004 | <i>Homo sapiens</i>                           |
| 2632 | Q9AQS0 | <i>Bacillus</i> sp.                           |
| 2633 | P36917 | <i>Thermoanaerobacterium saccharolyticum</i>  |
| 2634 | P26515 | <i>Streptomyces lividans</i>                  |
| 2635 | Q8J0K5 | <i>Talaromyces funiculosus</i>                |
| 2636 | Q28631 | <i>Oryctolagus cuniculus</i>                  |
| 2637 | P54423 | <i>Bacillus subtilis</i>                      |
| 2638 | Q3MUH7 | <i>Paenibacillus</i> sp.                      |
| 2639 | P40943 | <i>Geobacillus stearothermophilus</i>         |
| 2640 | Q8NJ73 | <i>Magnaporthe grisea</i>                     |
| 2641 | P26514 | <i>Streptomyces lividans</i>                  |
| 2642 | P23031 | <i>Cellvibrio japonicus</i>                   |
| 2643 | P45796 | <i>Paenibacillus polymyxa</i>                 |

|      |        |                                   |
|------|--------|-----------------------------------|
| 2644 | Q9S7Y7 | <i>Arabidopsis thaliana</i>       |
| 2645 | P07528 | <i>Bacillus halodurans</i>        |
| 2646 | P23360 | <i>Thermoascus aurantiacus</i>    |
| 2647 | Q45071 | <i>Bacillus subtilis</i>          |
| 2648 | Q41638 | <i>Phaseolus angularis</i>        |
| 2649 | Q2PGV8 | <i>Aureobasidium pullulans</i>    |
| 2650 | W0HJ53 | <i>Rhizopus oryzae</i>            |
| 2651 | P33559 | <i>Aspergillus kawachii</i>       |
| 2652 | Q2PGY1 | <i>Penicillium citrinum</i>       |
| 2653 | P44276 | <i>Haemophilus influenzae</i>     |
| 2654 | A4QFQ3 | <i>Corynebacterium glutamicum</i> |
| 2655 | P43972 | <i>Haemophilus influenzae</i>     |
| 2656 | Q57449 | <i>Haemophilus influenzae</i>     |
| 2657 | P94421 | <i>Bacillus subtilis</i>          |
| 2658 | P0AAX8 | <i>Escherichia coli</i>           |
| 2659 | P0A8X2 | <i>Escherichia coli</i>           |
| 2660 | P0ADU5 | <i>Escherichia coli</i>           |
| 2661 | P37648 | <i>Escherichia coli</i>           |
| 2662 | P33219 | <i>Escherichia coli</i>           |
| 2663 | O31737 | <i>Bacillus subtilis</i>          |
| 2664 | P77269 | <i>Escherichia coli</i>           |
| 2665 | P76172 | <i>Escherichia coli</i>           |
| 2666 | P76520 | <i>Escherichia coli</i>           |
| 2667 | O31803 | <i>Bacillus subtilis</i>          |
| 2668 | P96729 | <i>Bacillus subtilis</i>          |
| 2669 | P76344 | <i>Escherichia coli</i>           |
| 2670 | P39172 | <i>Escherichia coli</i>           |
| 2671 | P54484 | <i>Bacillus subtilis</i>          |
| 2672 | P39325 | <i>Escherichia coli</i>           |
| 2673 | Q59Y31 | <i>Candida albicans</i>           |
| 2674 | P42111 | <i>Bacillus subtilis</i>          |
| 2675 | Q9UK55 | <i>Homo sapiens</i>               |
| 2676 | P0AAA9 | <i>Escherichia coli</i>           |
| 2677 | P25311 | <i>Homo sapiens</i>               |
| 2678 | O60844 | <i>Homo sapiens</i>               |
| 2679 | P39187 | <i>Escherichia coli</i>           |
| 2680 | P94356 | <i>Bacillus subtilis</i>          |
| 2681 | P44526 | <i>Haemophilus influenzae</i>     |
| 2682 | Q60736 | <i>Mus musculus</i>               |
| 2683 | P33679 | <i>Zea mays</i>                   |
