# Supplementary material for: Identification and analysis of the cleavage site in a signal peptide using SMOTE, dagging, and feature selection methods
Source: Royal Society of Chemistry journal article supplement (doi:10.1039/c7mo00030h), 2017-12-20
Supplement: c7mo00030h1.zip [file c7mo00030h1.zip]

**Supplementary Material S4.** The MaxRel and mRMR feature list with 920 ranked features.

**(1) MaxRel feature list**

| <b>No.</b> | <b>Feature name</b> | <b>Score</b> |
|------------|---------------------|--------------|
| 1          | Site0_PSSM_A        | 0.221        |
| 2          | Site-2_PSSM_A       | 0.180        |
| 3          | Site-10_PSSM_L      | 0.174        |
| 4          | Site-11_PSSM_L      | 0.154        |
| 5          | Site0_AA_factor_1   | 0.147        |
| 6          | Site-12_PSSM_L      | 0.146        |
| 7          | Site-10_PSSM_F      | 0.141        |
| 8          | Site-10_PSSM_V      | 0.140        |
| 9          | Site-9_PSSM_L       | 0.139        |
| 10         | Site0_PSSM_Q        | 0.137        |
| 11         | Site-11_PSSM_V      | 0.136        |
| 12         | Site-6_PSSM_C       | 0.134        |
| 13         | Site-7_PSSM_V       | 0.132        |
| 14         | Site-12_PSSM_V      | 0.129        |
| 15         | Site-11_PSSM_F      | 0.126        |
| 16         | Site0_PSSM_S        | 0.125        |
| 17         | Site0_PSSM_V        | 0.125        |
| 18         | Site-12_PSSM_E      | 0.123        |
| 19         | Site-7_PSSM_C       | 0.123        |
| 20         | Site0_PSSM_D        | 0.123        |
| 21         | Site-13_PSSM_V      | 0.120        |
| 22         | Site0_PSSM_G        | 0.119        |
| 23         | Site-8_PSSM_V       | 0.118        |
| 24         | Site-10_AA_factor_1 | 0.118        |
| 25         | Site-11_AA_factor_1 | 0.118        |
| 26         | Site-9_PSSM_C       | 0.117        |
| 27         | Site-13_PSSM_L      | 0.116        |
| 28         | Site-9_PSSM_V       | 0.115        |
| 29         | Site-10_PSSM_I      | 0.115        |
| 30         | Site0_AA_factor_4   | 0.115        |
| 31         | Site-11_PSSM_I      | 0.114        |
| 32         | Site-12_PSSM_F      | 0.112        |
| 33         | Site-5_PSSM_C       | 0.111        |
| 34         | Site-9_PSSM_D       | 0.110        |
| 35         | Site0_AA_factor_3   | 0.110        |
| 36         | Site-9_PSSM_I       | 0.109        |
| 37         | Site-12_PSSM_I      | 0.106        |

|    |                    |       |
|----|--------------------|-------|
| 38 | Site-2_PSSM_T      | 0.106 |
| 39 | Site-8_PSSM_I      | 0.106 |
| 40 | Site-10_PSSM_Q     | 0.105 |
| 41 | Site-11_PSSM_D     | 0.105 |
| 42 | Site0_PSSM_L       | 0.105 |
| 43 | Site-11_PSSM_Q     | 0.104 |
| 44 | Site-2_PSSM_D      | 0.103 |
| 45 | Site-12_PSSM_Q     | 0.102 |
| 46 | Site-10_PSSM_D     | 0.102 |
| 47 | Site-10_PSSM_C     | 0.102 |
| 48 | Site-5_PSSM_I      | 0.101 |
| 49 | Site-8_PSSM_C      | 0.099 |
| 50 | Site-9_PSSM_Q      | 0.098 |
| 51 | Site-7_PSSM_I      | 0.098 |
| 52 | Site-6_PSSM_W      | 0.097 |
| 53 | Site-12_PSSM_D     | 0.097 |
| 54 | Site-8_PSSM_Q      | 0.096 |
| 55 | Site-1_PSSM_H      | 0.096 |
| 56 | Site-11_PSSM_C     | 0.095 |
| 57 | Site-2_AA_factor_4 | 0.094 |
| 58 | Site-13_PSSM_I     | 0.094 |
| 59 | Site-8_PSSM_L      | 0.093 |
| 60 | Site-2_PSSM_V      | 0.093 |
| 61 | Site-1_PSSM_G      | 0.092 |
| 62 | Site1_PSSM_E       | 0.092 |
| 63 | Site-8_PSSM_M      | 0.092 |
| 64 | Site-5_PSSM_L      | 0.092 |
| 65 | Site-2_PSSM_K      | 0.091 |
| 66 | Site-5_PSSM_M      | 0.091 |
| 67 | Site-8_PSSM_F      | 0.091 |
| 68 | Site0_PSSM_I       | 0.090 |
| 69 | Site-7_PSSM_L      | 0.090 |
| 70 | Site0_PSSM_E       | 0.090 |
| 71 | Site-11_PSSM_K     | 0.090 |
| 72 | Site-9_AA_factor_1 | 0.090 |
| 73 | Site-2_PSSM_L      | 0.090 |
| 74 | Site-6_PSSM_I      | 0.089 |
| 75 | Site-10_PSSM_K     | 0.089 |
| 76 | Site-2_AA_factor_1 | 0.089 |
| 77 | Site-6_PSSM_F      | 0.088 |
| 78 | Site-12_PSSM_C     | 0.088 |
| 79 | Site-1_PSSM_Q      | 0.087 |

|     |                     |       |
|-----|---------------------|-------|
| 80  | Site0_PSSM_P        | 0.086 |
| 81  | Site-13_PSSM_D      | 0.086 |
| 82  | Site-14_PSSM_L      | 0.086 |
| 83  | Site-12_PSSM_K      | 0.085 |
| 84  | Site-10_PSSM_R      | 0.084 |
| 85  | Site-2_AA_factor_3  | 0.084 |
| 86  | Site-2_PSSM_R       | 0.084 |
| 87  | Site-7_PSSM_F       | 0.083 |
| 88  | Site-13_PSSM_Q      | 0.083 |
| 89  | Site-1_PSSM_Y       | 0.083 |
| 90  | Site-6_PSSM_L       | 0.083 |
| 91  | Site-11_PSSM_M      | 0.082 |
| 92  | Site-13_PSSM_C      | 0.082 |
| 93  | Site-11_PSSM_E      | 0.081 |
| 94  | Site0_PSSM_K        | 0.081 |
| 95  | Site-7_PSSM_Q       | 0.080 |
| 96  | Site-10_PSSM_M      | 0.080 |
| 97  | Site-1_PSSM_P       | 0.080 |
| 98  | Site0_PSSM_N        | 0.080 |
| 99  | Site-10_PSSM_E      | 0.080 |
| 100 | Site-7_PSSM_M       | 0.079 |
| 101 | Site-12_PSSM_M      | 0.079 |
| 102 | Site-5_PSSM_K       | 0.079 |
| 103 | Site-9_PSSM_E       | 0.079 |
| 104 | Site-5_PSSM_F       | 0.079 |
| 105 | Site-3_PSSM_M       | 0.078 |
| 106 | Site-9_PSSM_K       | 0.077 |
| 107 | Site2_PSSM_E        | 0.077 |
| 108 | Site-4_PSSM_K       | 0.077 |
| 109 | Site0_PSSM_F        | 0.077 |
| 110 | Site-5_PSSM_V       | 0.076 |
| 111 | Site-8_PSSM_K       | 0.076 |
| 112 | Site-5_AA_factor_1  | 0.075 |
| 113 | Site-3_PSSM_R       | 0.075 |
| 114 | Site-8_AA_factor_1  | 0.075 |
| 115 | Site-8_PSSM_E       | 0.075 |
| 116 | Site-1_PSSM_V       | 0.074 |
| 117 | Site-1_PSSM_W       | 0.074 |
| 118 | Site-1_PSSM_D       | 0.074 |
| 119 | Site-12_AA_factor_1 | 0.073 |
| 120 | Site-6_PSSM_M       | 0.073 |
| 121 | Site-11_PSSM_R      | 0.073 |

|     |                     |       |
|-----|---------------------|-------|
| 122 | Site-4_PSSM_A       | 0.073 |
| 123 | Site-2_PSSM_G       | 0.073 |
| 124 | Site-2_PSSM_N       | 0.073 |
| 125 | Site-4_PSSM_T       | 0.072 |
| 126 | Site-3_PSSM_T       | 0.072 |
| 127 | Site-12_PSSM_R      | 0.072 |
| 128 | Site-3_PSSM_K       | 0.071 |
| 129 | Site-2_PSSM_P       | 0.071 |
| 130 | Site-9_PSSM_F       | 0.071 |
| 131 | Site-3_PSSM_P       | 0.070 |
| 132 | Site-1_PSSM_S       | 0.070 |
| 133 | Site-6_PSSM_V       | 0.070 |
| 134 | Site-3_PSSM_A       | 0.070 |
| 135 | Site-9_PSSM_M       | 0.070 |
| 136 | Site-8_PSSM_W       | 0.069 |
| 137 | Site-13_PSSM_F      | 0.069 |
| 138 | Site-11_PSSM_N      | 0.069 |
| 139 | Site-10_PSSM_N      | 0.068 |
| 140 | Site-6_PSSM_E       | 0.068 |
| 141 | Site-7_PSSM_K       | 0.068 |
| 142 | Site-3_PSSM_Y       | 0.067 |
| 143 | Site1_PSSM_A        | 0.067 |
| 144 | Site-14_PSSM_D      | 0.067 |
| 145 | Site-14_PSSM_V      | 0.067 |
| 146 | Site1_PSSM_S        | 0.066 |
| 147 | Site-4_PSSM_P       | 0.066 |
| 148 | Site-6_PSSM_K       | 0.066 |
| 149 | Site-5_PSSM_Y       | 0.066 |
| 150 | Site-9_PSSM_N       | 0.066 |
| 151 | Site-5_PSSM_E       | 0.065 |
| 152 | Site2_AA_factor_4   | 0.065 |
| 153 | Site-4_PSSM_S       | 0.065 |
| 154 | Site-11_AA_factor_5 | 0.065 |
| 155 | Site-13_PSSM_M      | 0.063 |
| 156 | Site-11_AA_factor_3 | 0.063 |
| 157 | Site-9_PSSM_R       | 0.063 |
| 158 | Site-12_PSSM_N      | 0.063 |
| 159 | Site-5_PSSM_D       | 0.062 |
| 160 | Site-4_PSSM_F       | 0.062 |
| 161 | Site-8_PSSM_R       | 0.062 |
| 162 | Site-2_PSSM_E       | 0.062 |
| 163 | Site-4_AA_factor_1  | 0.062 |

|     |                     |       |
|-----|---------------------|-------|
| 164 | Site-10_AA_factor_5 | 0.062 |
| 165 | Site-5_PSSM_R       | 0.061 |
| 166 | Site-7_AA_factor_1  | 0.061 |
| 167 | Site-2_PSSM_I       | 0.061 |
| 168 | Site0_PSSM_R        | 0.061 |
| 169 | Site-3_PSSM_E       | 0.061 |
| 170 | Site-11_AA_factor_2 | 0.060 |
| 171 | Site-3_PSSM_V       | 0.060 |
| 172 | Site-4_PSSM_R       | 0.060 |
| 173 | Site-8_PSSM_N       | 0.060 |
| 174 | Site-6_PSSM_Y       | 0.060 |
| 175 | Site-7_PSSM_E       | 0.060 |
| 176 | Site-13_PSSM_E      | 0.059 |
| 177 | Site-14_PSSM_I      | 0.059 |
| 178 | Site-1_PSSM_A       | 0.059 |
| 179 | Site-6_PSSM_D       | 0.058 |
| 180 | Site-3_PSSM_F       | 0.058 |
| 181 | Site-14_PSSM_C      | 0.058 |
| 182 | Site-4_PSSM_G       | 0.057 |
| 183 | Site-3_PSSM_S       | 0.057 |
| 184 | Site-5_PSSM_N       | 0.057 |
| 185 | Site1_PSSM_P        | 0.057 |
| 186 | Site-7_PSSM_R       | 0.057 |
| 187 | Site-8_PSSM_D       | 0.057 |
| 188 | Site-5_PSSM_A       | 0.056 |
| 189 | Site-11_PSSM_P      | 0.056 |
| 190 | Site-11_PSSM_H      | 0.056 |
| 191 | Site-12_PSSM_P      | 0.056 |
| 192 | Site-12_AA_factor_5 | 0.056 |
| 193 | Site-10_PSSM_Y      | 0.056 |
| 194 | Site1_PSSM_Q        | 0.056 |
| 195 | Site0_PSSM_C        | 0.055 |
| 196 | Site-10_AA_factor_3 | 0.055 |
| 197 | Site-1_PSSM_E       | 0.055 |
| 198 | Site-9_AA_factor_2  | 0.055 |
| 199 | Site-7_PSSM_W       | 0.054 |
| 200 | Site1_PSSM_D        | 0.054 |
| 201 | Site2_PSSM_D        | 0.054 |
| 202 | Site-13_PSSM_N      | 0.054 |
| 203 | Site-5_AA_factor_3  | 0.054 |
| 204 | Site-14_AA_factor_2 | 0.054 |
| 205 | Site-12_PSSM_H      | 0.053 |

|     |                     |       |
|-----|---------------------|-------|
| 206 | Site-10_AA_factor_2 | 0.053 |
| 207 | Site-10_PSSM_H      | 0.053 |
| 208 | Site-8_AA_factor_5  | 0.053 |
| 209 | Site2_PSSM_L        | 0.053 |
| 210 | Site-9_PSSM_H       | 0.052 |
| 211 | Site-14_AA_factor_4 | 0.052 |
| 212 | Site-3_PSSM_G       | 0.052 |
| 213 | Site-9_AA_factor_3  | 0.052 |
| 214 | Site-2_PSSM_C       | 0.051 |
| 215 | Site-3_PSSM_N       | 0.051 |
| 216 | Site1_PSSM_R        | 0.051 |
| 217 | Site2_PSSM_P        | 0.051 |
| 218 | Site-1_PSSM_N       | 0.050 |
| 219 | Site-7_PSSM_N       | 0.050 |
| 220 | Site-7_PSSM_D       | 0.050 |
| 221 | Site0_PSSM_H        | 0.050 |
| 222 | Site-4_PSSM_Y       | 0.050 |
| 223 | Site-3_PSSM_D       | 0.050 |
| 224 | Site-2_PSSM_S       | 0.050 |
| 225 | Site-9_AA_factor_5  | 0.049 |
| 226 | Site-13_PSSM_R      | 0.049 |
| 227 | Site-13_AA_factor_1 | 0.049 |
| 228 | Site-1_PSSM_I       | 0.049 |
| 229 | Site-7_PSSM_Y       | 0.049 |
| 230 | Site-5_AA_factor_5  | 0.049 |
| 231 | Site-14_PSSM_Q      | 0.049 |
| 232 | Site-1_PSSM_R       | 0.049 |
| 233 | Site1_PSSM_K        | 0.049 |
| 234 | Site-4_PSSM_E       | 0.049 |
| 235 | Site-12_AA_factor_3 | 0.049 |
| 236 | Site-10_AA_factor_4 | 0.048 |
| 237 | Site-4_PSSM_V       | 0.047 |
| 238 | Site-6_PSSM_N       | 0.047 |
| 239 | Site-6_PSSM_R       | 0.047 |
| 240 | Site-9_PSSM_Y       | 0.047 |
| 241 | Site1_PSSM_H        | 0.047 |
| 242 | Site2_PSSM_Q        | 0.047 |
| 243 | Site2_PSSM_C        | 0.046 |
| 244 | Site1_PSSM_G        | 0.046 |
| 245 | Site1_PSSM_L        | 0.046 |
| 246 | Site-13_PSSM_Y      | 0.046 |
| 247 | Site-7_AA_factor_3  | 0.045 |

|     |                     |       |
|-----|---------------------|-------|
| 248 | Site-8_PSSM_Y       | 0.045 |
| 249 | Site-11_AA_factor_4 | 0.045 |
| 250 | Site-4_PSSM_Q       | 0.044 |
| 251 | Site1_AA_factor_1   | 0.044 |
| 252 | Site-5_AA_factor_4  | 0.044 |
| 253 | Site-2_PSSM_F       | 0.044 |
| 254 | Site-4_PSSM_N       | 0.044 |
| 255 | Site0_PSSM_M        | 0.044 |
| 256 | Site-14_PSSM_P      | 0.043 |
| 257 | Site-2_PSSM_Q       | 0.043 |
| 258 | Site-13_PSSM_K      | 0.043 |
| 259 | Site-6_AA_factor_1  | 0.043 |
| 260 | Site-4_PSSM_I       | 0.043 |
| 261 | Site-12_AA_factor_2 | 0.042 |
| 262 | Site0_PSSM_Y        | 0.042 |
| 263 | Site-7_PSSM_A       | 0.041 |
| 264 | Site-3_PSSM_I       | 0.041 |
| 265 | Site-4_PSSM_H       | 0.041 |
| 266 | Site-5_PSSM_Q       | 0.040 |
| 267 | Site-8_PSSM_H       | 0.040 |
| 268 | Site-2_AA_factor_5  | 0.040 |
| 269 | Site-5_PSSM_G       | 0.039 |
| 270 | Site0_AA_10         | 0.039 |
| 271 | Site-13_PSSM_H      | 0.039 |
| 272 | Site-14_PSSM_N      | 0.039 |
| 273 | Site-12_AA_factor_4 | 0.038 |
| 274 | Site-2_PSSM_H       | 0.038 |
| 275 | Site-14_PSSM_M      | 0.038 |
| 276 | Site0_PSSM_T        | 0.038 |
| 277 | Site2_PSSM_G        | 0.038 |
| 278 | Site3_AA_factor_2   | 0.038 |
| 279 | Site-3_PSSM_H       | 0.038 |
| 280 | Site-8_AA_factor_3  | 0.038 |
| 281 | Site-8_PSSM_A       | 0.038 |
| 282 | Site2_AA_1          | 0.038 |
| 283 | Site-4_PSSM_D       | 0.037 |
| 284 | Site2_PSSM_R        | 0.037 |
| 285 | Site2_PSSM_F        | 0.037 |
| 286 | Site-11_PSSM_Y      | 0.037 |
| 287 | Site-6_PSSM_Q       | 0.036 |
| 288 | Site1_PSSM_V        | 0.036 |
| 289 | Site-2_AA_10        | 0.036 |

|     |                     |       |
|-----|---------------------|-------|
| 290 | Site-2_PSSM_Y       | 0.036 |
| 291 | Site2_PSSM_H        | 0.036 |
| 292 | Site-12_PSSM_Y      | 0.036 |
| 293 | Site3_PSSM_P        | 0.035 |
| 294 | Site5_PSSM_I        | 0.035 |
| 295 | Site-1_PSSM_K       | 0.035 |
| 296 | Site-9_PSSM_A       | 0.035 |
| 297 | Site-3_AA_factor_4  | 0.035 |
| 298 | Site1_PSSM_I        | 0.034 |
| 299 | Site-6_AA_factor_5  | 0.034 |
| 300 | Site-14_AA_factor_1 | 0.034 |
| 301 | Site-3_PSSM_C       | 0.034 |
| 302 | Site0_AA_18         | 0.033 |
| 303 | Site-13_PSSM_A      | 0.033 |
| 304 | Site5_PSSM_L        | 0.033 |
| 305 | Site-13_AA_factor_5 | 0.033 |
| 306 | Site-7_PSSM_H       | 0.032 |
| 307 | Site-4_PSSM_L       | 0.032 |
| 308 | Site-6_AA_factor_2  | 0.032 |
| 309 | Site-2_PSSM_M       | 0.032 |
| 310 | Site1_PSSM_T        | 0.032 |
| 311 | Site4_PSSM_I        | 0.032 |
| 312 | Site-14_AA_factor_5 | 0.032 |
| 313 | Site-10_PSSM_P      | 0.032 |
| 314 | Site3_PSSM_I        | 0.032 |
| 315 | Site0_AA_factor_5   | 0.032 |
| 316 | Site-1_AA_factor_4  | 0.031 |
| 317 | Site-3_PSSM_L       | 0.031 |
| 318 | Site-1_AA_factor_2  | 0.031 |
| 319 | Site-14_PSSM_F      | 0.031 |
| 320 | Site-8_AA_factor_2  | 0.031 |
| 321 | Site-14_PSSM_E      | 0.031 |
| 322 | Site-7_AA_factor_5  | 0.031 |
| 323 | Site-9_PSSM_P       | 0.030 |
| 324 | Site-13_AA_factor_4 | 0.030 |
| 325 | Site-11_PSSM_A      | 0.030 |
| 326 | Site0_AA_factor_2   | 0.029 |
| 327 | Site4_PSSM_L        | 0.029 |
| 328 | Site-10_PSSM_A      | 0.029 |
| 329 | Site-13_AA_factor_2 | 0.029 |
| 330 | Site-5_PSSM_H       | 0.029 |
| 331 | Site-14_PSSM_G      | 0.028 |



|     |                    |       |
|-----|--------------------|-------|
| 332 | Site2_PSSM_Y       | 0.028 |
| 333 | Site1_PSSM_C       | 0.028 |
| 334 | Site-3_AA_factor_1 | 0.028 |
| 335 | Site4_PSSM_G       | 0.028 |
| 336 | Site-8_PSSM_P      | 0.028 |
| 337 | Site-1_AA_factor_1 | 0.028 |
| 338 | Site-13_PSSM_P     | 0.027 |
| 339 | Site-12_PSSM_A     | 0.027 |
| 340 | Site-1_PSSM_L      | 0.027 |
| 341 | Site3_PSSM_L       | 0.027 |
| 342 | Site1_PSSM_N       | 0.027 |
| 343 | Site-1_AA_1        | 0.027 |
| 344 | Site1_AA_13        | 0.027 |
| 345 | Site-4_AA_factor_2 | 0.026 |
| 346 | Site5_PSSM_F       | 0.026 |
| 347 | Site-6_PSSM_A      | 0.026 |
| 348 | Site2_PSSM_K       | 0.025 |
| 349 | Site-7_AA_factor_4 | 0.025 |
| 350 | Site4_Disorder     | 0.025 |
| 351 | Site-10_Disorder   | 0.025 |
| 352 | Site4_PSSM_H       | 0.025 |
| 353 | Site4_PSSM_P       | 0.025 |
| 354 | Site-9_AA_factor_4 | 0.025 |
| 355 | Site2_PSSM_N       | 0.025 |
| 356 | Site-11_Disorder   | 0.025 |
| 357 | Site3_PSSM_H       | 0.024 |
| 358 | Site-14_PSSM_H     | 0.024 |
| 359 | Site2_PSSM_V       | 0.024 |
| 360 | Site-2_AA_factor_2 | 0.023 |
| 361 | Site-12_Disorder   | 0.023 |
| 362 | Site4_PSSM_R       | 0.023 |
| 363 | Site4_PSSM_Q       | 0.023 |
| 364 | Site-2_AA_1        | 0.023 |
| 365 | Site5_PSSM_H       | 0.023 |
| 366 | Site2_AA_factor_1  | 0.022 |
| 367 | Site-14_PSSM_A     | 0.022 |
| 368 | Site5_PSSM_Q       | 0.022 |
| 369 | Site1_AA_1         | 0.022 |
| 370 | Site-6_PSSM_G      | 0.022 |
| 371 | Site-4_AA_10       | 0.022 |
| 372 | Site5_Disorder     | 0.022 |
| 373 | Site4_PSSM_D       | 0.022 |

|     |                     |       |
|-----|---------------------|-------|
| 374 | Site0_AA_4          | 0.022 |
| 375 | Site-2_AA_13        | 0.022 |
| 376 | Site2_AA_13         | 0.021 |
| 377 | Site-8_Disorder     | 0.021 |
| 378 | Site-1_PSSM_T       | 0.021 |
| 379 | Site0_AA_3          | 0.021 |
| 380 | Site-6_PSSM_H       | 0.020 |
| 381 | Site0_PSSM_W        | 0.020 |
| 382 | Site-4_AA_factor_4  | 0.020 |
| 383 | Site-14_PSSM_Y      | 0.020 |
| 384 | Site-13_AA_factor_3 | 0.019 |
| 385 | Site0_AA_8          | 0.019 |
| 386 | Site5_AA_factor_2   | 0.019 |
| 387 | Site-14_PSSM_R      | 0.019 |
| 388 | Site-5_AA_factor_2  | 0.019 |
| 389 | Site-3_PSSM_Q       | 0.019 |
| 390 | Site-1_AA_13        | 0.019 |
| 391 | Site-7_PSSM_P       | 0.019 |
| 392 | Site-3_AA_factor_2  | 0.019 |
| 393 | Site-2_PSSM_W       | 0.019 |
| 394 | Site-4_PSSM_C       | 0.018 |
| 395 | Site3_PSSM_R        | 0.018 |
| 396 | Site3_AA_factor_5   | 0.018 |
| 397 | Site-4_PSSM_M       | 0.018 |
| 398 | Site1_PSSM_F        | 0.017 |
| 399 | Site5_AA_factor_5   | 0.017 |
| 400 | Site-14_AA_factor_3 | 0.017 |
| 401 | Site0_AA_13         | 0.017 |
| 402 | Site2_AA_factor_5   | 0.017 |
| 403 | Site-2_AA_14        | 0.017 |
| 404 | Site-7_PSSM_G       | 0.017 |
| 405 | Site-9_PSSM_W       | 0.017 |
| 406 | Site-6_PSSM_P       | 0.017 |
| 407 | Site1_AA_factor_3   | 0.017 |
| 408 | Site-2_AA_9         | 0.017 |
| 409 | Site0_AA_9          | 0.017 |
| 410 | Site4_AA_1          | 0.017 |
| 411 | Site5_PSSM_M        | 0.016 |
| 412 | Site2_PSSM_S        | 0.016 |
| 413 | Site-1_AA_factor_5  | 0.016 |
| 414 | Site3_AA_factor_1   | 0.016 |
| 415 | Site1_PSSM_M        | 0.016 |

|     |                    |       |
|-----|--------------------|-------|
| 416 | Site1_AA_factor_2  | 0.016 |
| 417 | Site-1_AA_6        | 0.016 |
| 418 | Site-13_PSSM_S     | 0.015 |
| 419 | Site-12_AA_9       | 0.015 |
| 420 | Site1_AA_3         | 0.015 |
| 421 | Site-10_AA_9       | 0.015 |
| 422 | Site-4_AA_factor_3 | 0.015 |
| 423 | Site5_PSSM_D       | 0.015 |
| 424 | Site5_PSSM_Y       | 0.015 |
| 425 | Site-10_AA_4       | 0.015 |
| 426 | Site2_AA_factor_2  | 0.015 |
| 427 | Site-11_AA_9       | 0.015 |
| 428 | Site-1_PSSM_C      | 0.015 |
| 429 | Site-6_AA_10       | 0.015 |
| 430 | Site1_AA_factor_5  | 0.015 |
| 431 | Site-6_AA_factor_3 | 0.015 |
| 432 | Site-7_AA_9        | 0.015 |
| 433 | Site0_AA_5         | 0.015 |
| 434 | Site3_PSSM_G       | 0.015 |
| 435 | Site-8_AA_9        | 0.015 |
| 436 | Site2_PSSM_M       | 0.015 |
| 437 | Site-8_AA_4        | 0.014 |
| 438 | Site3_PSSM_K       | 0.014 |
| 439 | Site1_PSSM_Y       | 0.014 |
| 440 | Site-5_PSSM_W      | 0.014 |
| 441 | Site-7_AA_factor_2 | 0.014 |
| 442 | Site1_AA_factor_4  | 0.014 |
| 443 | Site-2_AA_4        | 0.014 |
| 444 | Site-10_PSSM_W     | 0.014 |
| 445 | Site-6_Disorder    | 0.014 |
| 446 | Site4_PSSM_K       | 0.014 |
| 447 | Site-9_AA_3        | 0.014 |
| 448 | Site-9_AA_15       | 0.013 |
| 449 | Site4_PSSM_M       | 0.013 |
| 450 | Site3_PSSM_D       | 0.013 |
| 451 | Site-3_AA_factor_3 | 0.013 |
| 452 | Site4_AA_10        | 0.013 |
| 453 | Site5_PSSM_R       | 0.013 |
| 454 | Site0_Disorder     | 0.013 |
| 455 | Site-1_PSSM_F      | 0.013 |
| 456 | Site-2_AA_20       | 0.013 |
| 457 | Site-12_PSSM_S     | 0.013 |

|     |                   |       |
|-----|-------------------|-------|
| 458 | Site-10_AA_15     | 0.013 |
| 459 | Site0_AA_12       | 0.013 |
| 460 | Site-9_PSSM_T     | 0.013 |
| 461 | Site-2_AA_5       | 0.013 |
| 462 | Site-9_AA_9       | 0.013 |
| 463 | Site-11_PSSM_S    | 0.012 |
| 464 | Site4_AA_factor_5 | 0.012 |
| 465 | Site-7_AA_3       | 0.012 |
| 466 | Site-9_Disorder   | 0.012 |
| 467 | Site-11_AA_15     | 0.012 |
| 468 | Site-11_AA_10     | 0.012 |
| 469 | Site0_AA_20       | 0.012 |
| 470 | Site1_AA_17       | 0.012 |
| 471 | Site-2_AA_15      | 0.012 |
| 472 | Site-2_AA_12      | 0.012 |
| 473 | Site-1_Disorder   | 0.012 |
| 474 | Site5_PSSM_W      | 0.012 |
| 475 | Site-11_AA_3      | 0.012 |
| 476 | Site-11_AA_4      | 0.012 |
| 477 | Site-10_PSSM_T    | 0.012 |
| 478 | Site-5_Disorder   | 0.012 |
| 479 | Site4_PSSM_V      | 0.012 |
| 480 | Site-12_AA_15     | 0.012 |
| 481 | Site2_PSSM_T      | 0.011 |
| 482 | Site-2_AA_18      | 0.011 |
| 483 | Site-10_AA_3      | 0.011 |
| 484 | Site4_PSSM_F      | 0.011 |
| 485 | Site2_PSSM_W      | 0.011 |
| 486 | Site-9_AA_4       | 0.011 |
| 487 | Site-8_AA_3       | 0.011 |
| 488 | Site3_AA_1        | 0.011 |
| 489 | Site3_PSSM_F      | 0.011 |
| 490 | Site2_Disorder    | 0.011 |
| 491 | Site-13_AA_4      | 0.011 |
| 492 | Site-9_PSSM_S     | 0.011 |
| 493 | Site-10_AA_13     | 0.011 |
| 494 | Site-8_AA_15      | 0.011 |
| 495 | Site-1_AA_2       | 0.011 |
| 496 | Site-12_PSSM_W    | 0.011 |
| 497 | Site-11_PSSM_G    | 0.010 |
| 498 | Site-12_AA_4      | 0.010 |
| 499 | Site-1_PSSM_M     | 0.010 |

|     |                    |       |
|-----|--------------------|-------|
| 500 | Site5_AA_6         | 0.010 |
| 501 | Site-2_AA_3        | 0.010 |
| 502 | Site-10_AA_14      | 0.010 |
| 503 | Site1_AA_18        | 0.010 |
| 504 | Site-5_AA_9        | 0.010 |
| 505 | Site3_PSSM_V       | 0.010 |
| 506 | Site4_AA_factor_2  | 0.010 |
| 507 | Site5_PSSM_G       | 0.010 |
| 508 | Site5_PSSM_V       | 0.010 |
| 509 | Site-6_AA_3        | 0.010 |
| 510 | Site-8_AA_14       | 0.010 |
| 511 | Site-12_AA_14      | 0.010 |
| 512 | Site-10_PSSM_S     | 0.010 |
| 513 | Site-8_PSSM_T      | 0.010 |
| 514 | Site-3_Disorder    | 0.010 |
| 515 | Site-3_AA_3        | 0.009 |
| 516 | Site2_PSSM_A       | 0.009 |
| 517 | Site-8_AA_13       | 0.009 |
| 518 | Site5_AA_factor_1  | 0.009 |
| 519 | Site-4_Disorder    | 0.009 |
| 520 | Site0_AA_7         | 0.009 |
| 521 | Site-10_AA_12      | 0.009 |
| 522 | Site-3_PSSM_W      | 0.009 |
| 523 | Site-7_AA_13       | 0.009 |
| 524 | Site4_PSSM_E       | 0.009 |
| 525 | Site-8_AA_factor_4 | 0.009 |
| 526 | Site-12_AA_3       | 0.009 |
| 527 | Site-3_AA_2        | 0.009 |
| 528 | Site-13_AA_3       | 0.009 |
| 529 | Site-5_AA_4        | 0.009 |
| 530 | Site-4_AA_4        | 0.009 |
| 531 | Site2_AA_18        | 0.009 |
| 532 | Site5_PSSM_C       | 0.009 |
| 533 | Site-11_PSSM_W     | 0.009 |
| 534 | Site-13_AA_15      | 0.009 |
| 535 | Site-11_AA_14      | 0.009 |
| 536 | Site-11_AA_12      | 0.009 |
| 537 | Site-11_AA_18      | 0.009 |
| 538 | Site-5_AA_3        | 0.009 |
| 539 | Site-9_AA_5        | 0.009 |
| 540 | Site0_AA_15        | 0.008 |
| 541 | Site1_AA_16        | 0.008 |

|     |                   |       |
|-----|-------------------|-------|
| 542 | Site-8_PSSM_G     | 0.008 |
| 543 | Site-6_AA_5       | 0.008 |
| 544 | Site-9_AA_13      | 0.008 |
| 545 | Site-14_AA_3      | 0.008 |
| 546 | Site4_AA_factor_4 | 0.008 |
| 547 | Site-1_AA_8       | 0.008 |
| 548 | Site4_PSSM_W      | 0.008 |
| 549 | Site-13_PSSM_W    | 0.008 |
| 550 | Site-2_AA_11      | 0.008 |
| 551 | Site-1_AA_14      | 0.008 |
| 552 | Site-5_AA_15      | 0.008 |
| 553 | Site-8_PSSM_S     | 0.008 |
| 554 | Site5_AA_factor_4 | 0.008 |
| 555 | Site-9_PSSM_G     | 0.008 |
| 556 | Site-12_AA_10     | 0.008 |
| 557 | Site-14_AA_4      | 0.008 |
| 558 | Site-7_AA_15      | 0.008 |
| 559 | Site-5_AA_20      | 0.008 |
| 560 | Site4_PSSM_N      | 0.008 |
| 561 | Site-12_AA_13     | 0.008 |
| 562 | Site-12_AA_12     | 0.008 |
| 563 | Site2_PSSM_I      | 0.008 |
| 564 | Site-13_AA_9      | 0.007 |
| 565 | Site-4_AA_9       | 0.007 |
| 566 | Site-1_AA_18      | 0.007 |
| 567 | Site-9_AA_10      | 0.007 |
| 568 | Site-6_PSSM_T     | 0.007 |
| 569 | Site-9_AA_14      | 0.007 |
| 570 | Site-2_AA_7       | 0.007 |
| 571 | Site0_AA_17       | 0.007 |
| 572 | Site-11_AA_13     | 0.007 |
| 573 | Site-4_AA_2       | 0.007 |
| 574 | Site0_AA_11       | 0.007 |
| 575 | Site-2_AA_19      | 0.007 |
| 576 | Site-7_PSSM_T     | 0.007 |
| 577 | Site-13_AA_12     | 0.007 |
| 578 | Site-5_PSSM_T     | 0.007 |
| 579 | Site-14_PSSM_W    | 0.007 |
| 580 | Site-14_PSSM_K    | 0.007 |
| 581 | Site-2_Disorder   | 0.007 |
| 582 | Site4_AA_6        | 0.007 |
| 583 | Site1_AA_4        | 0.007 |

|     |                    |       |
|-----|--------------------|-------|
| 584 | Site3_PSSM_M       | 0.007 |
| 585 | Site-5_AA_14       | 0.007 |
| 586 | Site-13_PSSM_T     | 0.006 |
| 587 | Site-14_Disorder   | 0.006 |
| 588 | Site4_PSSM_S       | 0.006 |
| 589 | Site-12_PSSM_G     | 0.006 |
| 590 | Site-6_AA_9        | 0.006 |
| 591 | Site2_AA_2         | 0.006 |
| 592 | Site2_AA_5         | 0.006 |
| 593 | Site-10_AA_18      | 0.006 |
| 594 | Site-7_AA_4        | 0.006 |
| 595 | Site-13_Disorder   | 0.006 |
| 596 | Site3_AA_factor_4  | 0.006 |
| 597 | Site-10_AA_8       | 0.006 |
| 598 | Site-7_Disorder    | 0.006 |
| 599 | Site-14_AA_8       | 0.006 |
| 600 | Site-11_PSSM_T     | 0.006 |
| 601 | Site-14_PSSM_S     | 0.006 |
| 602 | Site-12_AA_8       | 0.006 |
| 603 | Site-9_AA_12       | 0.006 |
| 604 | Site4_AA_factor_1  | 0.006 |
| 605 | Site-8_AA_5        | 0.006 |
| 606 | Site0_AA_19        | 0.006 |
| 607 | Site2_AA_6         | 0.006 |
| 608 | Site-5_AA_6        | 0.005 |
| 609 | Site3_PSSM_W       | 0.005 |
| 610 | Site-14_AA_10      | 0.005 |
| 611 | Site-12_AA_18      | 0.005 |
| 612 | Site-4_AA_8        | 0.005 |
| 613 | Site1_AA_2         | 0.005 |
| 614 | Site-1_AA_9        | 0.005 |
| 615 | Site-1_AA_7        | 0.005 |
| 616 | Site1_Disorder     | 0.005 |
| 617 | Site-8_AA_12       | 0.005 |
| 618 | Site-10_AA_7       | 0.005 |
| 619 | Site3_PSSM_N       | 0.005 |
| 620 | Site-14_AA_12      | 0.005 |
| 621 | Site-6_AA_4        | 0.005 |
| 622 | Site3_PSSM_S       | 0.005 |
| 623 | Site-10_PSSM_G     | 0.005 |
| 624 | Site-3_AA_factor_5 | 0.005 |
| 625 | Site0_AA_16        | 0.005 |

|     |                    |       |
|-----|--------------------|-------|
| 626 | Site-9_AA_7        | 0.005 |
| 627 | Site-4_AA_1        | 0.005 |
| 628 | Site4_AA_13        | 0.005 |
| 629 | Site3_Disorder     | 0.005 |
| 630 | Site-11_AA_20      | 0.005 |
| 631 | Site-5_AA_18       | 0.005 |
| 632 | Site1_AA_10        | 0.005 |
| 633 | Site-11_AA_7       | 0.005 |
| 634 | Site3_PSSM_A       | 0.005 |
| 635 | Site-7_AA_12       | 0.004 |
| 636 | Site4_PSSM_A       | 0.004 |
| 637 | Site-13_AA_14      | 0.004 |
| 638 | Site-5_AA_1        | 0.004 |
| 639 | Site-6_AA_2        | 0.004 |
| 640 | Site-14_AA_5       | 0.004 |
| 641 | Site-2_AA_8        | 0.004 |
| 642 | Site-7_AA_18       | 0.004 |
| 643 | Site4_PSSM_Y       | 0.004 |
| 644 | Site-9_AA_16       | 0.004 |
| 645 | Site2_AA_factor_3  | 0.004 |
| 646 | Site-7_AA_10       | 0.004 |
| 647 | Site5_PSSM_T       | 0.004 |
| 648 | Site3_AA_18        | 0.004 |
| 649 | Site1_AA_20        | 0.004 |
| 650 | Site-5_PSSM_P      | 0.004 |
| 651 | Site-6_AA_11       | 0.004 |
| 652 | Site-9_AA_20       | 0.004 |
| 653 | Site5_PSSM_S       | 0.004 |
| 654 | Site-2_AA_6        | 0.004 |
| 655 | Site-3_AA_18       | 0.004 |
| 656 | Site5_PSSM_E       | 0.004 |
| 657 | Site1_PSSM_W       | 0.004 |
| 658 | Site3_PSSM_C       | 0.004 |
| 659 | Site-8_AA_20       | 0.004 |
| 660 | Site-10_AA_16      | 0.004 |
| 661 | Site-4_AA_factor_5 | 0.004 |
| 662 | Site-2_AA_17       | 0.004 |
| 663 | Site-13_PSSM_G     | 0.004 |
| 664 | Site4_AA_14        | 0.004 |
| 665 | Site-4_AA_20       | 0.004 |
| 666 | Site-14_AA_14      | 0.003 |
| 667 | Site-12_AA_7       | 0.003 |



|     |                   |       |
|-----|-------------------|-------|
| 668 | Site-9_AA_11      | 0.003 |
| 669 | Site-14_AA_13     | 0.003 |
| 670 | Site-10_AA_20     | 0.003 |
| 671 | Site-13_AA_8      | 0.003 |
| 672 | Site-7_AA_14      | 0.003 |
| 673 | Site-3_AA_12      | 0.003 |
| 674 | Site-13_AA_16     | 0.003 |
| 675 | Site0_AA_2        | 0.003 |
| 676 | Site5_PSSM_A      | 0.003 |
| 677 | Site-14_PSSM_T    | 0.003 |
| 678 | Site-5_AA_7       | 0.003 |
| 679 | Site-5_AA_12      | 0.003 |
| 680 | Site1_AA_15       | 0.003 |
| 681 | Site-13_AA_13     | 0.003 |
| 682 | Site-1_AA_3       | 0.003 |
| 683 | Site-14_AA_11     | 0.003 |
| 684 | Site2_AA_20       | 0.003 |
| 685 | Site-6_PSSM_S     | 0.003 |
| 686 | Site-11_AA_19     | 0.003 |
| 687 | Site3_AA_20       | 0.003 |
| 688 | Site-12_PSSM_T    | 0.003 |
| 689 | Site-13_AA_7      | 0.003 |
| 690 | Site-4_AA_15      | 0.003 |
| 691 | Site3_AA_factor_3 | 0.003 |
| 692 | Site5_PSSM_K      | 0.003 |
| 693 | Site-8_AA_8       | 0.003 |
| 694 | Site5_PSSM_P      | 0.003 |
| 695 | Site-4_AA_5       | 0.003 |
| 696 | Site2_AA_11       | 0.003 |
| 697 | Site2_AA_10       | 0.003 |
| 698 | Site-10_AA_6      | 0.003 |
| 699 | Site4_AA_12       | 0.003 |
| 700 | Site3_AA_13       | 0.003 |
| 701 | Site-5_AA_10      | 0.003 |
| 702 | Site-14_AA_17     | 0.003 |
| 703 | Site-12_AA_5      | 0.003 |
| 704 | Site-12_AA_20     | 0.003 |
| 705 | Site-11_AA_5      | 0.003 |
| 706 | Site-6_AA_8       | 0.003 |
| 707 | Site4_AA_11       | 0.003 |
| 708 | Site-5_AA_8       | 0.003 |
| 709 | Site-5_AA_16      | 0.002 |

|     |                    |       |
|-----|--------------------|-------|
| 710 | Site5_AA_13        | 0.002 |
| 711 | Site4_PSSM_C       | 0.002 |
| 712 | Site-3_AA_13       | 0.002 |
| 713 | Site-3_AA_4        | 0.002 |
| 714 | Site-4_AA_18       | 0.002 |
| 715 | Site3_PSSM_E       | 0.002 |
| 716 | Site-11_AA_11      | 0.002 |
| 717 | Site-8_AA_11       | 0.002 |
| 718 | Site2_AA_3         | 0.002 |
| 719 | Site-1_AA_20       | 0.002 |
| 720 | Site3_AA_6         | 0.002 |
| 721 | Site-3_AA_15       | 0.002 |
| 722 | Site5_PSSM_N       | 0.002 |
| 723 | Site-4_PSSM_W      | 0.002 |
| 724 | Site-6_AA_16       | 0.002 |
| 725 | Site-11_AA_6       | 0.002 |
| 726 | Site-1_AA_17       | 0.002 |
| 727 | Site-11_AA_8       | 0.002 |
| 728 | Site3_AA_15        | 0.002 |
| 729 | Site3_PSSM_T       | 0.002 |
| 730 | Site4_AA_4         | 0.002 |
| 731 | Site-7_AA_5        | 0.002 |
| 732 | Site5_AA_factor_3  | 0.002 |
| 733 | Site-3_AA_6        | 0.002 |
| 734 | Site1_AA_9         | 0.002 |
| 735 | Site-6_AA_14       | 0.002 |
| 736 | Site-6_AA_20       | 0.002 |
| 737 | Site4_AA_factor_3  | 0.002 |
| 738 | Site1_AA_19        | 0.002 |
| 739 | Site-14_AA_16      | 0.002 |
| 740 | Site-10_AA_1       | 0.002 |
| 741 | Site-1_AA_factor_3 | 0.002 |
| 742 | Site-7_AA_11       | 0.002 |
| 743 | Site-8_AA_18       | 0.002 |
| 744 | Site-14_AA_1       | 0.002 |
| 745 | Site-14_AA_6       | 0.002 |
| 746 | Site4_AA_16        | 0.002 |
| 747 | Site-5_PSSM_S      | 0.002 |
| 748 | Site4_AA_8         | 0.002 |
| 749 | Site-2_AA_16       | 0.002 |
| 750 | Site-11_AA_1       | 0.002 |
| 751 | Site5_AA_4         | 0.002 |

|     |                    |       |
|-----|--------------------|-------|
| 752 | Site5_AA_12        | 0.002 |
| 753 | Site-4_AA_14       | 0.002 |
| 754 | Site-5_AA_13       | 0.002 |
| 755 | Site-13_AA_5       | 0.002 |
| 756 | Site-7_PSSM_S      | 0.002 |
| 757 | Site-8_AA_7        | 0.002 |
| 758 | Site-1_AA_10       | 0.002 |
| 759 | Site4_AA_2         | 0.001 |
| 760 | Site2_AA_19        | 0.001 |
| 761 | Site-1_AA_19       | 0.001 |
| 762 | Site0_AA_6         | 0.001 |
| 763 | Site-6_AA_12       | 0.001 |
| 764 | Site4_PSSM_T       | 0.001 |
| 765 | Site-9_AA_19       | 0.001 |
| 766 | Site-13_AA_20      | 0.001 |
| 767 | Site-3_AA_9        | 0.001 |
| 768 | Site3_PSSM_Q       | 0.001 |
| 769 | Site-7_AA_7        | 0.001 |
| 770 | Site5_AA_17        | 0.001 |
| 771 | Site-13_AA_17      | 0.001 |
| 772 | Site-6_AA_factor_4 | 0.001 |
| 773 | Site-8_AA_6        | 0.001 |
| 774 | Site-5_AA_19       | 0.001 |
| 775 | Site3_AA_4         | 0.001 |
| 776 | Site-12_AA_1       | 0.001 |
| 777 | Site-6_AA_15       | 0.001 |
| 778 | Site-3_AA_19       | 0.001 |
| 779 | Site5_AA_5         | 0.001 |
| 780 | Site-8_AA_17       | 0.001 |
| 781 | Site-3_AA_20       | 0.001 |
| 782 | Site3_AA_2         | 0.001 |
| 783 | Site5_AA_19        | 0.001 |
| 784 | Site3_AA_12        | 0.001 |
| 785 | Site-11_AA_16      | 0.001 |
| 786 | Site-14_AA_18      | 0.001 |
| 787 | Site-6_AA_19       | 0.001 |
| 788 | Site-1_AA_12       | 0.001 |
| 789 | Site2_AA_14        | 0.001 |
| 790 | Site-4_AA_12       | 0.001 |
| 791 | Site4_AA_7         | 0.001 |
| 792 | Site-3_AA_5        | 0.001 |
| 793 | Site4_AA_20        | 0.001 |

|     |               |       |
|-----|---------------|-------|
| 794 | Site-12_AA_6  | 0.001 |
| 795 | Site-4_AA_7   | 0.001 |
| 796 | Site3_PSSM_Y  | 0.001 |
| 797 | Site-6_AA_6   | 0.001 |
| 798 | Site2_AA_8    | 0.001 |
| 799 | Site5_AA_18   | 0.001 |
| 800 | Site1_AA_14   | 0.001 |
| 801 | Site4_AA_9    | 0.001 |
| 802 | Site5_AA_10   | 0.001 |
| 803 | Site-14_AA_9  | 0.001 |
| 804 | Site4_AA_3    | 0.001 |
| 805 | Site1_AA_7    | 0.001 |
| 806 | Site-4_AA_3   | 0.001 |
| 807 | Site-9_AA_6   | 0.001 |
| 808 | Site3_AA_5    | 0.001 |
| 809 | Site3_AA_19   | 0.001 |
| 810 | Site-1_AA_5   | 0.001 |
| 811 | Site5_AA_3    | 0.001 |
| 812 | Site-14_AA_7  | 0.001 |
| 813 | Site-5_AA_11  | 0.001 |
| 814 | Site-7_AA_1   | 0.001 |
| 815 | Site-3_AA_8   | 0.001 |
| 816 | Site-7_AA_2   | 0.001 |
| 817 | Site3_AA_16   | 0.001 |
| 818 | Site5_AA_8    | 0.001 |
| 819 | Site-8_AA_1   | 0.001 |
| 820 | Site2_AA_16   | 0.001 |
| 821 | Site-5_AA_5   | 0.001 |
| 822 | Site-8_AA_19  | 0.001 |
| 823 | Site-4_AA_11  | 0.001 |
| 824 | Site-7_AA_16  | 0.001 |
| 825 | Site3_AA_7    | 0.000 |
| 826 | Site-3_AA_7   | 0.000 |
| 827 | Site2_AA_9    | 0.000 |
| 828 | Site-4_AA_6   | 0.000 |
| 829 | Site-12_AA_17 | 0.000 |
| 830 | Site-5_AA_17  | 0.000 |
| 831 | Site5_AA_2    | 0.000 |
| 832 | Site-6_AA_7   | 0.000 |
| 833 | Site-14_AA_20 | 0.000 |
| 834 | Site2_AA_17   | 0.000 |
| 835 | Site-13_AA_2  | 0.000 |

|     |               |       |
|-----|---------------|-------|
| 836 | Site5_AA_7    | 0.000 |
| 837 | Site-6_AA_17  | 0.000 |
| 838 | Site5_AA_1    | 0.000 |
| 839 | Site4_AA_5    | 0.000 |
| 840 | Site-1_AA_16  | 0.000 |
| 841 | Site-1_AA_4   | 0.000 |
| 842 | Site-12_AA_11 | 0.000 |
| 843 | Site-14_AA_15 | 0.000 |
| 844 | Site-11_AA_2  | 0.000 |
| 845 | Site-9_AA_2   | 0.000 |
| 846 | Site3_AA_3    | 0.000 |
| 847 | Site-3_AA_11  | 0.000 |
| 848 | Site-10_AA_19 | 0.000 |
| 849 | Site3_AA_10   | 0.000 |
| 850 | Site3_AA_11   | 0.000 |
| 851 | Site-10_AA_2  | 0.000 |
| 852 | Site-12_AA_16 | 0.000 |
| 853 | Site-4_AA_19  | 0.000 |
| 854 | Site-12_AA_19 | 0.000 |
| 855 | Site4_AA_15   | 0.000 |
| 856 | Site3_AA_17   | 0.000 |
| 857 | Site-6_AA_18  | 0.000 |
| 858 | Site-4_AA_16  | 0.000 |
| 859 | Site5_AA_11   | 0.000 |
| 860 | Site-13_AA_19 | 0.000 |
| 861 | Site-5_AA_2   | 0.000 |
| 862 | Site-13_AA_11 | 0.000 |
| 863 | Site-14_AA_19 | 0.000 |
| 864 | Site-7_AA_19  | 0.000 |
| 865 | Site1_AA_5    | 0.000 |
| 866 | Site-8_AA_10  | 0.000 |
| 867 | Site-7_AA_20  | 0.000 |
| 868 | Site-11_AA_17 | 0.000 |
| 869 | Site-1_AA_15  | 0.000 |
| 870 | Site-6_AA_13  | 0.000 |
| 871 | Site1_AA_12   | 0.000 |
| 872 | Site-9_AA_1   | 0.000 |
| 873 | Site-10_AA_5  | 0.000 |
| 874 | Site5_AA_15   | 0.000 |
| 875 | Site5_AA_16   | 0.000 |
| 876 | Site-13_AA_1  | 0.000 |
| 877 | Site5_AA_9    | 0.000 |

|     |               |       |
|-----|---------------|-------|
| 878 | Site2_AA_15   | 0.000 |
| 879 | Site-4_AA_17  | 0.000 |
| 880 | Site-8_AA_16  | 0.000 |
| 881 | Site1_AA_8    | 0.000 |
| 882 | Site3_AA_8    | 0.000 |
| 883 | Site-4_AA_13  | 0.000 |
| 884 | Site-2_AA_2   | 0.000 |
| 885 | Site4_AA_18   | 0.000 |
| 886 | Site-10_AA_10 | 0.000 |
| 887 | Site5_AA_20   | 0.000 |
| 888 | Site-9_AA_17  | 0.000 |
| 889 | Site-3_AA_17  | 0.000 |
| 890 | Site-1_AA_11  | 0.000 |
| 891 | Site-14_AA_2  | 0.000 |
| 892 | Site-3_AA_1   | 0.000 |
| 893 | Site-10_AA_17 | 0.000 |
| 894 | Site2_AA_12   | 0.000 |
| 895 | Site1_AA_11   | 0.000 |
| 896 | Site-9_AA_18  | 0.000 |
| 897 | Site-8_AA_2   | 0.000 |
| 898 | Site-10_AA_11 | 0.000 |
| 899 | Site4_AA_17   | 0.000 |
| 900 | Site-3_AA_10  | 0.000 |
| 901 | Site-13_AA_18 | 0.000 |
| 902 | Site-3_AA_16  | 0.000 |
| 903 | Site-9_AA_8   | 0.000 |
| 904 | Site-13_AA_6  | 0.000 |
| 905 | Site5_AA_14   | 0.000 |
| 906 | Site-7_AA_6   | 0.000 |
| 907 | Site-6_AA_1   | 0.000 |
| 908 | Site2_AA_7    | 0.000 |
| 909 | Site3_AA_9    | 0.000 |
| 910 | Site-13_AA_10 | 0.000 |
| 911 | Site-7_AA_17  | 0.000 |
| 912 | Site4_AA_19   | 0.000 |
| 913 | Site3_AA_14   | 0.000 |
| 914 | Site1_AA_6    | 0.000 |
| 915 | Site-3_AA_14  | 0.000 |
| 916 | Site2_AA_4    | 0.000 |
| 917 | Site-12_AA_2  | 0.000 |
| 918 | Site0_AA_1    | 0.000 |
| 919 | Site0_AA_14   | 0.000 |

|     |             |       |
|-----|-------------|-------|
| 920 | Site-7_AA_8 | 0.000 |
|-----|-------------|-------|

**(2) mRMR feature list**

| No. | Feature name        | Score |
|-----|---------------------|-------|
| 1   | Site0_PSSM_A        | 0.221 |
| 2   | Site-10_PSSM_L      | 0.106 |
| 3   | Site-2_PSSM_A       | 0.086 |
| 4   | Site0_AA_factor_1   | 0.089 |
| 5   | Site-11_PSSM_L      | 0.091 |
| 6   | Site-13_PSSM_V      | 0.083 |
| 7   | Site-6_PSSM_C       | 0.082 |
| 8   | Site0_PSSM_Q        | 0.083 |
| 9   | Site-12_PSSM_L      | 0.086 |
| 10  | Site-7_PSSM_V       | 0.077 |
| 11  | Site-9_PSSM_L       | 0.074 |
| 12  | Site-1_PSSM_H       | 0.075 |
| 13  | Site0_PSSM_V        | 0.075 |
| 14  | Site-10_AA_factor_1 | 0.077 |
| 15  | Site-11_AA_factor_1 | 0.077 |
| 16  | Site0_PSSM_S        | 0.077 |
| 17  | Site0_AA_factor_4   | 0.078 |
| 18  | Site-12_PSSM_V      | 0.076 |
| 19  | Site-10_PSSM_F      | 0.077 |
| 20  | Site-11_PSSM_V      | 0.074 |
| 21  | Site-2_PSSM_D       | 0.073 |
| 22  | Site-8_PSSM_V       | 0.074 |
| 23  | Site-7_PSSM_C       | 0.074 |
| 24  | Site-10_PSSM_V      | 0.074 |
| 25  | Site0_AA_factor_3   | 0.074 |
| 26  | Site0_PSSM_D        | 0.074 |
| 27  | Site-9_PSSM_C       | 0.073 |
| 28  | Site-2_AA_factor_4  | 0.071 |
| 29  | Site0_PSSM_G        | 0.072 |
| 30  | Site-12_PSSM_E      | 0.072 |
| 31  | Site1_PSSM_E        | 0.071 |
| 32  | Site-2_PSSM_T       | 0.071 |
| 33  | Site-6_PSSM_W       | 0.070 |
| 34  | Site-11_PSSM_F      | 0.070 |
| 35  | Site-5_PSSM_I       | 0.069 |
| 36  | Site-9_PSSM_D       | 0.069 |
| 37  | Site-13_PSSM_L      | 0.068 |
| 38  | Site-1_PSSM_G       | 0.066 |
| 39  | Site-10_PSSM_Q      | 0.066 |

|    |                    |       |
|----|--------------------|-------|
| 40 | Site0_PSSM_L       | 0.066 |
| 41 | Site-9_PSSM_V      | 0.064 |
| 42 | Site-11_PSSM_Q     | 0.064 |
| 43 | Site-2_AA_factor_1 | 0.064 |
| 44 | Site-5_PSSM_C      | 0.064 |
| 45 | Site-1_PSSM_Q      | 0.063 |
| 46 | Site-8_PSSM_Q      | 0.063 |
| 47 | Site-12_PSSM_F     | 0.063 |
| 48 | Site-5_PSSM_M      | 0.062 |
| 49 | Site-8_PSSM_I      | 0.062 |
| 50 | Site-12_PSSM_Q     | 0.062 |
| 51 | Site-10_PSSM_C     | 0.062 |
| 52 | Site-11_PSSM_I     | 0.061 |
| 53 | Site-2_AA_factor_3 | 0.061 |
| 54 | Site-10_PSSM_I     | 0.062 |
| 55 | Site-9_PSSM_Q      | 0.061 |
| 56 | Site-1_PSSM_Y      | 0.061 |
| 57 | Site-2_PSSM_L      | 0.061 |
| 58 | Site-9_PSSM_I      | 0.061 |
| 59 | Site-7_PSSM_I      | 0.060 |
| 60 | Site-11_PSSM_C     | 0.059 |
| 61 | Site-12_PSSM_I     | 0.059 |
| 62 | Site2_PSSM_E       | 0.059 |
| 63 | Site-8_PSSM_M      | 0.057 |
| 64 | Site-13_PSSM_I     | 0.057 |
| 65 | Site-2_PSSM_V      | 0.057 |
| 66 | Site-11_PSSM_D     | 0.056 |
| 67 | Site-6_PSSM_F      | 0.056 |
| 68 | Site-9_AA_factor_1 | 0.056 |
| 69 | Site-12_PSSM_C     | 0.056 |
| 70 | Site-3_PSSM_M      | 0.056 |
| 71 | Site0_PSSM_E       | 0.056 |
| 72 | Site-10_PSSM_D     | 0.056 |
| 73 | Site0_PSSM_I       | 0.055 |
| 74 | Site2_AA_factor_4  | 0.055 |
| 75 | Site-2_PSSM_K      | 0.055 |
| 76 | Site-8_PSSM_F      | 0.054 |
| 77 | Site-6_PSSM_I      | 0.054 |
| 78 | Site-5_AA_factor_1 | 0.054 |
| 79 | Site-13_PSSM_C     | 0.054 |
| 80 | Site-8_PSSM_C      | 0.053 |
| 81 | Site-1_PSSM_D      | 0.052 |



|     |                     |       |
|-----|---------------------|-------|
| 82  | Site-13_PSSM_Q      | 0.053 |
| 83  | Site-5_PSSM_L       | 0.052 |
| 84  | Site-14_PSSM_L      | 0.052 |
| 85  | Site-4_PSSM_K       | 0.052 |
| 86  | Site-7_PSSM_F       | 0.052 |
| 87  | Site-11_PSSM_K      | 0.052 |
| 88  | Site0_PSSM_P        | 0.052 |
| 89  | Site-8_AA_factor_1  | 0.051 |
| 90  | Site0_PSSM_F        | 0.051 |
| 91  | Site-10_PSSM_K      | 0.051 |
| 92  | Site-12_PSSM_D      | 0.051 |
| 93  | Site-1_PSSM_W       | 0.050 |
| 94  | Site-4_PSSM_T       | 0.050 |
| 95  | Site-12_AA_factor_1 | 0.050 |
| 96  | Site-7_PSSM_L       | 0.050 |
| 97  | Site-3_PSSM_T       | 0.050 |
| 98  | Site-2_PSSM_R       | 0.049 |
| 99  | Site0_PSSM_N        | 0.049 |
| 100 | Site-13_PSSM_D      | 0.049 |
| 101 | Site-5_PSSM_F       | 0.049 |
| 102 | Site-1_PSSM_P       | 0.049 |
| 103 | Site-10_PSSM_R      | 0.049 |
| 104 | Site-8_PSSM_L       | 0.049 |
| 105 | Site-11_PSSM_M      | 0.049 |
| 106 | Site0_PSSM_K        | 0.048 |
| 107 | Site-12_PSSM_K      | 0.048 |
| 108 | Site-3_PSSM_P       | 0.048 |
| 109 | Site-1_PSSM_V       | 0.048 |
| 110 | Site-12_PSSM_M      | 0.048 |
| 111 | Site-7_PSSM_M       | 0.048 |
| 112 | Site-2_PSSM_G       | 0.048 |
| 113 | Site-7_PSSM_Q       | 0.048 |
| 114 | Site-10_PSSM_M      | 0.048 |
| 115 | Site-1_PSSM_S       | 0.048 |
| 116 | Site-2_PSSM_N       | 0.048 |
| 117 | Site-3_PSSM_Y       | 0.048 |
| 118 | Site-11_AA_factor_3 | 0.047 |
| 119 | Site-3_PSSM_R       | 0.047 |
| 120 | Site-4_PSSM_A       | 0.046 |
| 121 | Site-6_PSSM_L       | 0.046 |
| 122 | Site-5_PSSM_V       | 0.045 |
| 123 | Site-4_AA_factor_1  | 0.045 |

|     |                     |       |
|-----|---------------------|-------|
| 124 | Site1_PSSM_S        | 0.045 |
| 125 | Site-11_AA_factor_2 | 0.045 |
| 126 | Site-9_PSSM_K       | 0.045 |
| 127 | Site-8_PSSM_W       | 0.044 |
| 128 | Site-14_PSSM_V      | 0.044 |
| 129 | Site-12_PSSM_R      | 0.044 |
| 130 | Site-5_PSSM_Y       | 0.044 |
| 131 | Site-4_PSSM_S       | 0.043 |
| 132 | Site-11_PSSM_R      | 0.043 |
| 133 | Site-6_PSSM_M       | 0.043 |
| 134 | Site-9_AA_factor_2  | 0.043 |
| 135 | Site-3_PSSM_A       | 0.043 |
| 136 | Site-5_PSSM_K       | 0.043 |
| 137 | Site-14_AA_factor_4 | 0.043 |
| 138 | Site-10_AA_factor_5 | 0.043 |
| 139 | Site-8_PSSM_K       | 0.043 |
| 140 | Site-13_PSSM_F      | 0.042 |
| 141 | Site-7_AA_factor_1  | 0.042 |
| 142 | Site-3_PSSM_K       | 0.042 |
| 143 | Site-14_PSSM_D      | 0.042 |
| 144 | Site1_PSSM_A        | 0.042 |
| 145 | Site-4_PSSM_P       | 0.042 |
| 146 | Site-9_PSSM_E       | 0.041 |
| 147 | Site-11_AA_factor_5 | 0.041 |
| 148 | Site-14_AA_factor_2 | 0.041 |
| 149 | Site-5_AA_factor_3  | 0.041 |
| 150 | Site-4_PSSM_F       | 0.040 |
| 151 | Site-3_PSSM_V       | 0.040 |
| 152 | Site-6_PSSM_V       | 0.040 |
| 153 | Site-8_PSSM_E       | 0.040 |
| 154 | Site-3_PSSM_S       | 0.040 |
| 155 | Site-10_AA_factor_2 | 0.040 |
| 156 | Site-13_PSSM_M      | 0.040 |
| 157 | Site-2_PSSM_P       | 0.040 |
| 158 | Site-6_PSSM_Y       | 0.039 |
| 159 | Site-12_AA_factor_5 | 0.039 |
| 160 | Site-10_PSSM_E      | 0.039 |
| 161 | Site-8_AA_factor_5  | 0.039 |
| 162 | Site-11_PSSM_E      | 0.039 |
| 163 | Site-4_PSSM_G       | 0.039 |
| 164 | Site-6_PSSM_E       | 0.039 |
| 165 | Site1_PSSM_Q        | 0.039 |

|     |                     |       |
|-----|---------------------|-------|
| 166 | Site-9_PSSM_M       | 0.039 |
| 167 | Site-14_PSSM_C      | 0.038 |
| 168 | Site2_PSSM_D        | 0.038 |
| 169 | Site-9_PSSM_F       | 0.038 |
| 170 | Site-10_PSSM_Y      | 0.038 |
| 171 | Site2_PSSM_L        | 0.037 |
| 172 | Site-14_PSSM_I      | 0.036 |
| 173 | Site-1_PSSM_A       | 0.036 |
| 174 | Site-6_PSSM_K       | 0.036 |
| 175 | Site-3_PSSM_F       | 0.036 |
| 176 | Site-10_AA_factor_3 | 0.036 |
| 177 | Site-2_PSSM_I       | 0.036 |
| 178 | Site-9_PSSM_N       | 0.036 |
| 179 | Site-13_AA_factor_1 | 0.036 |
| 180 | Site-3_PSSM_E       | 0.036 |
| 181 | Site-7_PSSM_K       | 0.036 |
| 182 | Site0_PSSM_C        | 0.036 |
| 183 | Site-9_AA_factor_3  | 0.036 |
| 184 | Site0_PSSM_R        | 0.036 |
| 185 | Site-10_AA_factor_4 | 0.035 |
| 186 | Site1_PSSM_D        | 0.035 |
| 187 | Site-9_PSSM_R       | 0.035 |
| 188 | Site2_AA_1          | 0.035 |
| 189 | Site-1_PSSM_E       | 0.035 |
| 190 | Site3_AA_factor_2   | 0.035 |
| 191 | Site-11_PSSM_N      | 0.034 |
| 192 | Site-12_AA_factor_3 | 0.034 |
| 193 | Site-4_PSSM_R       | 0.034 |
| 194 | Site1_PSSM_R        | 0.034 |
| 195 | Site-7_AA_factor_3  | 0.034 |
| 196 | Site-5_AA_factor_5  | 0.034 |
| 197 | Site-10_PSSM_N      | 0.034 |
| 198 | Site-5_PSSM_A       | 0.034 |
| 199 | Site-1_PSSM_N       | 0.034 |
| 200 | Site-8_PSSM_R       | 0.034 |
| 201 | Site-5_PSSM_E       | 0.034 |
| 202 | Site-13_PSSM_Y      | 0.033 |
| 203 | Site1_AA_factor_1   | 0.033 |
| 204 | Site0_AA_10         | 0.032 |
| 205 | Site-8_PSSM_N       | 0.033 |
| 206 | Site-2_PSSM_E       | 0.033 |
| 207 | Site-11_AA_factor_4 | 0.032 |

|     |                     |       |
|-----|---------------------|-------|
| 208 | Site-13_PSSM_R      | 0.032 |
| 209 | Site-12_PSSM_P      | 0.032 |
| 210 | Site2_PSSM_C        | 0.032 |
| 211 | Site-5_PSSM_R       | 0.032 |
| 212 | Site2_PSSM_Q        | 0.032 |
| 213 | Site-11_PSSM_P      | 0.032 |
| 214 | Site-5_AA_factor_4  | 0.032 |
| 215 | Site-13_PSSM_E      | 0.031 |
| 216 | Site-3_PSSM_N       | 0.031 |
| 217 | Site-7_PSSM_W       | 0.031 |
| 218 | Site-9_AA_factor_5  | 0.031 |
| 219 | Site-2_PSSM_C       | 0.031 |
| 220 | Site-4_PSSM_Y       | 0.031 |
| 221 | Site-2_AA_10        | 0.031 |
| 222 | Site-12_AA_factor_2 | 0.031 |
| 223 | Site1_PSSM_K        | 0.031 |
| 224 | Site-12_PSSM_N      | 0.031 |
| 225 | Site-3_PSSM_G       | 0.031 |
| 226 | Site-6_PSSM_D       | 0.031 |
| 227 | Site-7_PSSM_Y       | 0.031 |
| 228 | Site-12_AA_factor_4 | 0.030 |
| 229 | Site-5_PSSM_D       | 0.030 |
| 230 | Site-13_PSSM_N      | 0.030 |
| 231 | Site-11_PSSM_H      | 0.030 |
| 232 | Site0_AA_18         | 0.030 |
| 233 | Site1_PSSM_P        | 0.030 |
| 234 | Site-14_PSSM_P      | 0.030 |
| 235 | Site0_PSSM_H        | 0.029 |
| 236 | Site-6_AA_factor_1  | 0.029 |
| 237 | Site-4_PSSM_V       | 0.029 |
| 238 | Site-1_PSSM_I       | 0.029 |
| 239 | Site-2_PSSM_S       | 0.029 |
| 240 | Site-14_PSSM_Q      | 0.029 |
| 241 | Site-7_PSSM_R       | 0.029 |
| 242 | Site-8_PSSM_Y       | 0.028 |
| 243 | Site1_PSSM_H        | 0.028 |
| 244 | Site-9_PSSM_Y       | 0.028 |
| 245 | Site-1_PSSM_R       | 0.028 |
| 246 | Site0_PSSM_Y        | 0.028 |
| 247 | Site-5_PSSM_N       | 0.028 |
| 248 | Site1_PSSM_L        | 0.028 |
| 249 | Site-8_PSSM_D       | 0.028 |

|     |                     |       |
|-----|---------------------|-------|
| 250 | Site5_PSSM_I        | 0.028 |
| 251 | Site-9_PSSM_H       | 0.028 |
| 252 | Site-6_AA_factor_2  | 0.028 |
| 253 | Site0_PSSM_M        | 0.028 |
| 254 | Site2_PSSM_P        | 0.028 |
| 255 | Site-4_PSSM_Q       | 0.028 |
| 256 | Site-3_AA_factor_4  | 0.028 |
| 257 | Site-2_AA_factor_5  | 0.028 |
| 258 | Site-7_PSSM_E       | 0.028 |
| 259 | Site1_PSSM_G        | 0.027 |
| 260 | Site-12_PSSM_H      | 0.027 |
| 261 | Site-1_AA_factor_2  | 0.027 |
| 262 | Site-4_PSSM_N       | 0.027 |
| 263 | Site-7_PSSM_A       | 0.026 |
| 264 | Site-10_PSSM_H      | 0.026 |
| 265 | Site-8_AA_factor_3  | 0.026 |
| 266 | Site-3_PSSM_D       | 0.026 |
| 267 | Site-6_AA_factor_5  | 0.026 |
| 268 | Site-2_PSSM_F       | 0.025 |
| 269 | Site-1_AA_factor_4  | 0.025 |
| 270 | Site1_AA_13         | 0.025 |
| 271 | Site-13_AA_factor_4 | 0.025 |
| 272 | Site2_PSSM_F        | 0.025 |
| 273 | Site-4_PSSM_E       | 0.025 |
| 274 | Site-9_PSSM_A       | 0.025 |
| 275 | Site5_PSSM_L        | 0.025 |
| 276 | Site4_PSSM_I        | 0.024 |
| 277 | Site-1_AA_1         | 0.024 |
| 278 | Site-4_PSSM_H       | 0.024 |
| 279 | Site-8_AA_factor_2  | 0.024 |
| 280 | Site-3_PSSM_I       | 0.024 |
| 281 | Site-7_PSSM_N       | 0.024 |
| 282 | Site-13_PSSM_A      | 0.024 |
| 283 | Site1_PSSM_V        | 0.024 |
| 284 | Site-6_PSSM_N       | 0.024 |
| 285 | Site-14_PSSM_N      | 0.024 |
| 286 | Site-11_PSSM_Y      | 0.024 |
| 287 | Site-13_AA_factor_5 | 0.023 |
| 288 | Site0_AA_factor_2   | 0.023 |
| 289 | Site-4_PSSM_I       | 0.023 |
| 290 | Site-8_PSSM_A       | 0.023 |
| 291 | Site-6_PSSM_R       | 0.023 |

|     |                     |       |
|-----|---------------------|-------|
| 292 | Site-14_AA_factor_1 | 0.023 |
| 293 | Site-4_AA_factor_2  | 0.022 |
| 294 | Site-12_PSSM_Y      | 0.022 |
| 295 | Site3_PSSM_I        | 0.022 |
| 296 | Site2_PSSM_H        | 0.022 |
| 297 | Site-13_AA_factor_2 | 0.022 |
| 298 | Site-2_PSSM_Y       | 0.021 |
| 299 | Site1_PSSM_T        | 0.021 |
| 300 | Site-5_PSSM_G       | 0.021 |
| 301 | Site2_PSSM_R        | 0.021 |
| 302 | Site-7_AA_factor_5  | 0.021 |
| 303 | Site-13_PSSM_H      | 0.021 |
| 304 | Site-2_PSSM_Q       | 0.021 |
| 305 | Site2_PSSM_Y        | 0.020 |
| 306 | Site2_PSSM_G        | 0.020 |
| 307 | Site0_AA_factor_5   | 0.020 |
| 308 | Site0_PSSM_T        | 0.020 |
| 309 | Site-13_PSSM_K      | 0.020 |
| 310 | Site-11_PSSM_A      | 0.020 |
| 311 | Site-7_PSSM_D       | 0.020 |
| 312 | Site-2_AA_13        | 0.020 |
| 313 | Site-14_AA_factor_5 | 0.020 |
| 314 | Site-8_PSSM_H       | 0.020 |
| 315 | Site-7_AA_factor_4  | 0.020 |
| 316 | Site-1_AA_factor_1  | 0.020 |
| 317 | Site1_PSSM_I        | 0.019 |
| 318 | Site-14_PSSM_G      | 0.019 |
| 319 | Site0_AA_4          | 0.019 |
| 320 | Site-3_PSSM_C       | 0.019 |
| 321 | Site-10_PSSM_A      | 0.019 |
| 322 | Site-9_AA_factor_4  | 0.019 |
| 323 | Site-3_AA_factor_1  | 0.019 |
| 324 | Site3_PSSM_P        | 0.019 |
| 325 | Site4_PSSM_L        | 0.018 |
| 326 | Site-2_PSSM_H       | 0.018 |
| 327 | Site-3_PSSM_H       | 0.018 |
| 328 | Site0_AA_3          | 0.018 |
| 329 | Site-4_AA_10        | 0.018 |
| 330 | Site-12_PSSM_A      | 0.018 |
| 331 | Site-5_PSSM_Q       | 0.018 |
| 332 | Site-11_Disorder    | 0.017 |
| 333 | Site-14_PSSM_M      | 0.017 |

|     |                    |       |
|-----|--------------------|-------|
| 334 | Site2_AA_13        | 0.017 |
| 335 | Site5_AA_factor_2  | 0.017 |
| 336 | Site-13_PSSM_P     | 0.017 |
| 337 | Site-2_PSSM_M      | 0.017 |
| 338 | Site-1_AA_13       | 0.017 |
| 339 | Site0_AA_8         | 0.017 |
| 340 | Site5_PSSM_F       | 0.017 |
| 341 | Site-12_Disorder   | 0.016 |
| 342 | Site-6_PSSM_Q      | 0.016 |
| 343 | Site4_PSSM_R       | 0.016 |
| 344 | Site3_PSSM_L       | 0.016 |
| 345 | Site0_AA_13        | 0.016 |
| 346 | Site1_AA_1         | 0.016 |
| 347 | Site4_AA_1         | 0.016 |
| 348 | Site4_PSSM_H       | 0.016 |
| 349 | Site-10_PSSM_P     | 0.015 |
| 350 | Site-4_PSSM_D      | 0.015 |
| 351 | Site-2_AA_1        | 0.015 |
| 352 | Site5_PSSM_H       | 0.015 |
| 353 | Site-9_PSSM_P      | 0.015 |
| 354 | Site-2_AA_14       | 0.015 |
| 355 | Site3_AA_factor_5  | 0.015 |
| 356 | Site4_PSSM_G       | 0.015 |
| 357 | Site5_AA_factor_5  | 0.014 |
| 358 | Site5_PSSM_Q       | 0.014 |
| 359 | Site-2_AA_factor_2 | 0.014 |
| 360 | Site-1_PSSM_K      | 0.014 |
| 361 | Site-14_PSSM_A     | 0.014 |
| 362 | Site2_PSSM_V       | 0.014 |
| 363 | Site0_AA_9         | 0.014 |
| 364 | Site0_PSSM_W       | 0.014 |
| 365 | Site-5_AA_factor_2 | 0.014 |
| 366 | Site-2_AA_9        | 0.014 |
| 367 | Site-1_AA_6        | 0.014 |
| 368 | Site-3_AA_factor_2 | 0.013 |
| 369 | Site-14_PSSM_H     | 0.013 |
| 370 | Site4_PSSM_D       | 0.013 |
| 371 | Site-3_PSSM_L      | 0.013 |
| 372 | Site1_PSSM_C       | 0.013 |
| 373 | Site-4_PSSM_L      | 0.013 |
| 374 | Site1_AA_factor_3  | 0.013 |
| 375 | Site2_AA_factor_1  | 0.013 |

|     |                     |       |
|-----|---------------------|-------|
| 376 | Site-13_AA_factor_3 | 0.013 |
| 377 | Site0_AA_5          | 0.013 |
| 378 | Site1_AA_3          | 0.013 |
| 379 | Site-14_PSSM_F      | 0.013 |
| 380 | Site-12_AA_9        | 0.013 |
| 381 | Site-10_Disorder    | 0.013 |
| 382 | Site-2_PSSM_W       | 0.012 |
| 383 | Site4_PSSM_Q        | 0.012 |
| 384 | Site-8_PSSM_P       | 0.012 |
| 385 | Site-4_AA_factor_4  | 0.012 |
| 386 | Site-14_PSSM_E      | 0.012 |
| 387 | Site-1_PSSM_L       | 0.012 |
| 388 | Site-7_PSSM_H       | 0.012 |
| 389 | Site-10_AA_9        | 0.012 |
| 390 | Site2_AA_factor_5   | 0.012 |
| 391 | Site3_PSSM_H        | 0.012 |
| 392 | Site-6_PSSM_A       | 0.012 |
| 393 | Site-11_AA_9        | 0.012 |
| 394 | Site-9_PSSM_W       | 0.012 |
| 395 | Site-10_AA_4        | 0.012 |
| 396 | Site2_PSSM_N        | 0.012 |
| 397 | Site-6_PSSM_G       | 0.012 |
| 398 | Site-2_AA_4         | 0.012 |
| 399 | Site-7_AA_9         | 0.012 |
| 400 | Site-8_AA_9         | 0.012 |
| 401 | Site-5_PSSM_H       | 0.012 |
| 402 | Site4_AA_10         | 0.011 |
| 403 | Site-8_Disorder     | 0.011 |
| 404 | Site1_PSSM_N        | 0.011 |
| 405 | Site-8_AA_4         | 0.011 |
| 406 | Site-9_AA_15        | 0.011 |
| 407 | Site-2_AA_20        | 0.011 |
| 408 | Site-2_AA_5         | 0.011 |
| 409 | Site0_AA_12         | 0.011 |
| 410 | Site1_AA_17         | 0.011 |
| 411 | Site-10_AA_15       | 0.011 |
| 412 | Site-9_AA_3         | 0.011 |
| 413 | Site5_PSSM_M        | 0.011 |
| 414 | Site-1_AA_factor_5  | 0.011 |
| 415 | Site1_AA_factor_2   | 0.011 |
| 416 | Site-2_AA_15        | 0.010 |
| 417 | Site-4_AA_factor_3  | 0.010 |



|     |                     |       |
|-----|---------------------|-------|
| 418 | Site2_AA_factor_2   | 0.010 |
| 419 | Site0_AA_20         | 0.010 |
| 420 | Site-11_AA_15       | 0.010 |
| 421 | Site-2_AA_12        | 0.010 |
| 422 | Site-7_AA_factor_2  | 0.010 |
| 423 | Site5_PSSM_Y        | 0.010 |
| 424 | Site3_AA_factor_1   | 0.010 |
| 425 | Site4_Disorder      | 0.010 |
| 426 | Site-6_AA_factor_3  | 0.010 |
| 427 | Site-9_AA_9         | 0.010 |
| 428 | Site3_AA_1          | 0.010 |
| 429 | Site-7_AA_3         | 0.010 |
| 430 | Site4_AA_factor_5   | 0.010 |
| 431 | Site-14_AA_factor_3 | 0.010 |
| 432 | Site-12_AA_15       | 0.010 |
| 433 | Site-3_AA_factor_3  | 0.009 |
| 434 | Site-10_PSSM_W      | 0.010 |
| 435 | Site-6_AA_10        | 0.009 |
| 436 | Site-11_AA_3        | 0.009 |
| 437 | Site-6_PSSM_H       | 0.009 |
| 438 | Site4_PSSM_P        | 0.009 |
| 439 | Site1_AA_factor_5   | 0.009 |
| 440 | Site-1_AA_2         | 0.009 |
| 441 | Site1_PSSM_Y        | 0.009 |
| 442 | Site-11_AA_4        | 0.009 |
| 443 | Site2_PSSM_K        | 0.009 |
| 444 | Site-10_AA_3        | 0.009 |
| 445 | Site-5_PSSM_W       | 0.009 |
| 446 | Site-13_PSSM_S      | 0.009 |
| 447 | Site-8_AA_15        | 0.009 |
| 448 | Site5_AA_6          | 0.009 |
| 449 | Site-10_AA_13       | 0.009 |
| 450 | Site-1_PSSM_T       | 0.009 |
| 451 | Site-9_AA_4         | 0.009 |
| 452 | Site0_AA_7          | 0.009 |
| 453 | Site-8_AA_3         | 0.009 |
| 454 | Site1_AA_18         | 0.009 |
| 455 | Site-14_PSSM_R      | 0.009 |
| 456 | Site-13_AA_4        | 0.008 |
| 457 | Site-9_Disorder     | 0.008 |
| 458 | Site-2_AA_3         | 0.008 |
| 459 | Site-10_AA_14       | 0.008 |

|     |                    |       |
|-----|--------------------|-------|
| 460 | Site4_AA_factor_2  | 0.008 |
| 461 | Site-8_AA_14       | 0.008 |
| 462 | Site-12_AA_14      | 0.008 |
| 463 | Site-12_AA_4       | 0.008 |
| 464 | Site-7_AA_13       | 0.008 |
| 465 | Site-14_PSSM_Y     | 0.008 |
| 466 | Site-6_AA_3        | 0.008 |
| 467 | Site1_AA_factor_4  | 0.008 |
| 468 | Site-8_AA_13       | 0.008 |
| 469 | Site-5_AA_9        | 0.008 |
| 470 | Site-10_AA_12      | 0.008 |
| 471 | Site-2_AA_18       | 0.008 |
| 472 | Site-3_AA_3        | 0.008 |
| 473 | Site5_PSSM_W       | 0.008 |
| 474 | Site5_Disorder     | 0.008 |
| 475 | Site-3_AA_2        | 0.007 |
| 476 | Site-8_AA_factor_4 | 0.007 |
| 477 | Site-2_AA_11       | 0.007 |
| 478 | Site-12_PSSM_W     | 0.007 |
| 479 | Site2_AA_18        | 0.007 |
| 480 | Site5_PSSM_D       | 0.007 |
| 481 | Site0_AA_15        | 0.007 |
| 482 | Site1_PSSM_F       | 0.007 |
| 483 | Site-6_Disorder    | 0.007 |
| 484 | Site-13_AA_15      | 0.007 |
| 485 | Site-4_AA_4        | 0.007 |
| 486 | Site-11_AA_12      | 0.007 |
| 487 | Site2_PSSM_W       | 0.007 |
| 488 | Site-12_AA_3       | 0.007 |
| 489 | Site-1_AA_8        | 0.007 |
| 490 | Site-13_AA_3       | 0.007 |
| 491 | Site2_PSSM_S       | 0.007 |
| 492 | Site3_PSSM_G       | 0.007 |
| 493 | Site-5_AA_4        | 0.007 |
| 494 | Site-11_AA_14      | 0.007 |
| 495 | Site-1_AA_14       | 0.007 |
| 496 | Site-10_PSSM_T     | 0.007 |
| 497 | Site-7_PSSM_G      | 0.007 |
| 498 | Site1_AA_16        | 0.007 |
| 499 | Site-11_AA_10      | 0.007 |
| 500 | Site4_PSSM_M       | 0.007 |
| 501 | Site-9_AA_5        | 0.007 |

|     |                   |       |
|-----|-------------------|-------|
| 502 | Site-5_AA_3       | 0.007 |
| 503 | Site-5_AA_15      | 0.007 |
| 504 | Site-9_AA_13      | 0.007 |
| 505 | Site4_PSSM_K      | 0.007 |
| 506 | Site-6_AA_5       | 0.007 |
| 507 | Site-2_AA_7       | 0.006 |
| 508 | Site-5_AA_20      | 0.006 |
| 509 | Site2_PSSM_M      | 0.006 |
| 510 | Site-3_PSSM_Q     | 0.006 |
| 511 | Site3_PSSM_R      | 0.006 |
| 512 | Site-14_AA_3      | 0.006 |
| 513 | Site-2_AA_19      | 0.006 |
| 514 | Site-7_AA_15      | 0.006 |
| 515 | Site-12_AA_12     | 0.006 |
| 516 | Site-12_AA_13     | 0.006 |
| 517 | Site-11_AA_18     | 0.006 |
| 518 | Site0_AA_11       | 0.006 |
| 519 | Site-1_AA_18      | 0.006 |
| 520 | Site5_PSSM_C      | 0.006 |
| 521 | Site-11_PSSM_S    | 0.006 |
| 522 | Site-14_AA_4      | 0.006 |
| 523 | Site-9_PSSM_S     | 0.006 |
| 524 | Site-4_AA_2       | 0.006 |
| 525 | Site5_AA_factor_4 | 0.006 |
| 526 | Site-4_AA_9       | 0.006 |
| 527 | Site-13_AA_12     | 0.006 |
| 528 | Site-13_AA_9      | 0.006 |
| 529 | Site-9_AA_14      | 0.006 |
| 530 | Site5_PSSM_R      | 0.006 |
| 531 | Site-5_Disorder   | 0.006 |
| 532 | Site-11_AA_13     | 0.005 |
| 533 | Site-4_PSSM_M     | 0.005 |
| 534 | Site2_AA_5        | 0.005 |
| 535 | Site4_AA_6        | 0.005 |
| 536 | Site5_PSSM_V      | 0.005 |
| 537 | Site-5_AA_14      | 0.005 |
| 538 | Site-12_PSSM_S    | 0.005 |
| 539 | Site3_PSSM_V      | 0.005 |
| 540 | Site4_AA_factor_4 | 0.005 |
| 541 | Site0_AA_19       | 0.005 |
| 542 | Site-13_PSSM_W    | 0.005 |
| 543 | Site1_AA_4        | 0.005 |

|     |                   |       |
|-----|-------------------|-------|
| 544 | Site-3_PSSM_W     | 0.005 |
| 545 | Site-14_Disorder  | 0.005 |
| 546 | Site-6_PSSM_P     | 0.005 |
| 547 | Site4_PSSM_V      | 0.005 |
| 548 | Site2_Disorder    | 0.005 |
| 549 | Site2_AA_2        | 0.005 |
| 550 | Site-7_PSSM_P     | 0.005 |
| 551 | Site4_PSSM_W      | 0.005 |
| 552 | Site-4_PSSM_C     | 0.005 |
| 553 | Site-6_AA_9       | 0.005 |
| 554 | Site-1_AA_7       | 0.005 |
| 555 | Site-13_Disorder  | 0.005 |
| 556 | Site-9_AA_12      | 0.005 |
| 557 | Site3_PSSM_K      | 0.005 |
| 558 | Site-14_AA_8      | 0.004 |
| 559 | Site-9_PSSM_T     | 0.004 |
| 560 | Site-7_AA_4       | 0.004 |
| 561 | Site-12_AA_8      | 0.004 |
| 562 | Site1_PSSM_M      | 0.004 |
| 563 | Site-10_AA_7      | 0.004 |
| 564 | Site-8_AA_5       | 0.004 |
| 565 | Site2_AA_6        | 0.004 |
| 566 | Site4_PSSM_F      | 0.004 |
| 567 | Site-4_AA_8       | 0.004 |
| 568 | Site-5_AA_6       | 0.004 |
| 569 | Site5_AA_factor_1 | 0.004 |
| 570 | Site-14_AA_12     | 0.004 |
| 571 | Site-9_AA_7       | 0.004 |
| 572 | Site-14_PSSM_W    | 0.004 |
| 573 | Site-8_AA_12      | 0.004 |
| 574 | Site-11_AA_20     | 0.004 |
| 575 | Site1_AA_2        | 0.004 |
| 576 | Site-7_Disorder   | 0.004 |
| 577 | Site-11_AA_7      | 0.004 |
| 578 | Site-1_PSSM_F     | 0.004 |
| 579 | Site-1_AA_9       | 0.004 |
| 580 | Site-10_AA_18     | 0.004 |
| 581 | Site-1_Disorder   | 0.004 |
| 582 | Site0_AA_17       | 0.004 |
| 583 | Site-11_PSSM_W    | 0.004 |
| 584 | Site-12_AA_18     | 0.004 |
| 585 | Site-2_AA_8       | 0.004 |

|     |                   |       |
|-----|-------------------|-------|
| 586 | Site-7_AA_12      | 0.004 |
| 587 | Site0_AA_16       | 0.003 |
| 588 | Site-6_AA_4       | 0.003 |
| 589 | Site-1_PSSM_C     | 0.003 |
| 590 | Site-10_AA_8      | 0.003 |
| 591 | Site3_AA_18       | 0.003 |
| 592 | Site4_AA_13       | 0.003 |
| 593 | Site-12_AA_10     | 0.003 |
| 594 | Site-6_AA_11      | 0.003 |
| 595 | Site-13_AA_14     | 0.003 |
| 596 | Site-9_AA_20      | 0.003 |
| 597 | Site-4_AA_1       | 0.003 |
| 598 | Site1_AA_20       | 0.003 |
| 599 | Site-8_PSSM_S     | 0.003 |
| 600 | Site5_PSSM_G      | 0.003 |
| 601 | Site-5_AA_18      | 0.003 |
| 602 | Site3_PSSM_D      | 0.003 |
| 603 | Site-14_AA_5      | 0.003 |
| 604 | Site-8_AA_20      | 0.003 |
| 605 | Site-12_AA_7      | 0.003 |
| 606 | Site-10_PSSM_S    | 0.003 |
| 607 | Site4_AA_factor_1 | 0.003 |
| 608 | Site-3_AA_18      | 0.003 |
| 609 | Site-9_AA_10      | 0.003 |
| 610 | Site-2_AA_17      | 0.003 |
| 611 | Site-4_Disorder   | 0.003 |
| 612 | Site-9_AA_16      | 0.003 |
| 613 | Site-5_AA_7       | 0.003 |
| 614 | Site-10_AA_20     | 0.003 |
| 615 | Site-4_AA_20      | 0.003 |
| 616 | Site-8_PSSM_T     | 0.003 |
| 617 | Site-3_AA_12      | 0.003 |
| 618 | Site-14_AA_13     | 0.003 |
| 619 | Site3_AA_factor_4 | 0.003 |
| 620 | Site-14_AA_14     | 0.002 |
| 621 | Site-13_AA_7      | 0.002 |
| 622 | Site-13_AA_8      | 0.002 |
| 623 | Site-3_Disorder   | 0.002 |
| 624 | Site2_AA_11       | 0.002 |
| 625 | Site4_AA_12       | 0.002 |
| 626 | Site-5_AA_12      | 0.002 |
| 627 | Site1_AA_15       | 0.002 |

|     |                |       |
|-----|----------------|-------|
| 628 | Site-4_AA_5    | 0.002 |
| 629 | Site-7_AA_14   | 0.002 |
| 630 | Site4_AA_11    | 0.002 |
| 631 | Site-13_AA_13  | 0.002 |
| 632 | Site-1_AA_3    | 0.002 |
| 633 | Site2_AA_20    | 0.002 |
| 634 | Site3_PSSM_F   | 0.002 |
| 635 | Site-4_AA_15   | 0.002 |
| 636 | Site1_Disorder | 0.002 |
| 637 | Site-10_AA_16  | 0.002 |
| 638 | Site-12_AA_20  | 0.002 |
| 639 | Site3_AA_20    | 0.002 |
| 640 | Site0_AA_2     | 0.002 |
| 641 | Site2_PSSM_T   | 0.002 |
| 642 | Site-11_PSSM_G | 0.002 |
| 643 | Site-13_AA_16  | 0.002 |
| 644 | Site1_AA_10    | 0.002 |
| 645 | Site-14_AA_10  | 0.002 |
| 646 | Site-6_AA_8    | 0.002 |
| 647 | Site-9_PSSM_G  | 0.002 |
| 648 | Site-5_AA_8    | 0.002 |
| 649 | Site4_PSSM_E   | 0.002 |
| 650 | Site-10_AA_6   | 0.002 |
| 651 | Site4_AA_14    | 0.002 |
| 652 | Site-8_AA_11   | 0.002 |
| 653 | Site-12_AA_5   | 0.002 |
| 654 | Site3_Disorder | 0.002 |
| 655 | Site-9_AA_11   | 0.002 |
| 656 | Site-11_AA_11  | 0.002 |
| 657 | Site1_AA_19    | 0.002 |
| 658 | Site-1_AA_17   | 0.002 |
| 659 | Site-3_AA_15   | 0.002 |
| 660 | Site-11_AA_5   | 0.002 |
| 661 | Site-8_PSSM_G  | 0.002 |
| 662 | Site3_AA_15    | 0.002 |
| 663 | Site3_AA_13    | 0.002 |
| 664 | Site5_AA_13    | 0.001 |
| 665 | Site-14_AA_11  | 0.001 |
| 666 | Site-7_AA_11   | 0.001 |
| 667 | Site-3_AA_4    | 0.001 |
| 668 | Site-14_PSSM_S | 0.001 |
| 669 | Site0_Disorder | 0.001 |

|     |                   |       |
|-----|-------------------|-------|
| 670 | Site-6_AA_20      | 0.001 |
| 671 | Site4_PSSM_N      | 0.001 |
| 672 | Site4_AA_4        | 0.001 |
| 673 | Site-11_AA_8      | 0.001 |
| 674 | Site-7_AA_5       | 0.001 |
| 675 | Site-5_AA_1       | 0.001 |
| 676 | Site2_AA_3        | 0.001 |
| 677 | Site3_AA_6        | 0.001 |
| 678 | Site5_AA_4        | 0.001 |
| 679 | Site-3_AA_13      | 0.001 |
| 680 | Site-6_AA_2       | 0.001 |
| 681 | Site4_AA_16       | 0.001 |
| 682 | Site-9_AA_19      | 0.001 |
| 683 | Site2_AA_19       | 0.001 |
| 684 | Site-8_AA_7       | 0.001 |
| 685 | Site4_AA_8        | 0.001 |
| 686 | Site-1_AA_19      | 0.001 |
| 687 | Site5_AA_12       | 0.001 |
| 688 | Site2_PSSM_A      | 0.001 |
| 689 | Site-6_AA_14      | 0.001 |
| 690 | Site2_AA_factor_3 | 0.001 |
| 691 | Site1_AA_9        | 0.001 |
| 692 | Site-6_AA_16      | 0.001 |
| 693 | Site-13_AA_20     | 0.001 |
| 694 | Site-11_AA_6      | 0.001 |
| 695 | Site-5_AA_19      | 0.001 |
| 696 | Site-7_AA_10      | 0.001 |
| 697 | Site-3_AA_19      | 0.001 |
| 698 | Site-7_AA_7       | 0.001 |
| 699 | Site-4_AA_14      | 0.001 |
| 700 | Site-7_AA_18      | 0.001 |
| 701 | Site-8_AA_18      | 0.001 |
| 702 | Site5_AA_19       | 0.001 |
| 703 | Site-1_PSSM_M     | 0.001 |
| 704 | Site-4_AA_18      | 0.001 |
| 705 | Site-5_AA_16      | 0.001 |
| 706 | Site5_AA_17       | 0.001 |
| 707 | Site-14_AA_6      | 0.001 |
| 708 | Site-6_AA_19      | 0.001 |
| 709 | Site3_AA_4        | 0.001 |
| 710 | Site-6_AA_12      | 0.001 |
| 711 | Site3_AA_12       | 0.001 |

|     |                    |       |
|-----|--------------------|-------|
| 712 | Site-13_AA_5       | 0.001 |
| 713 | Site3_PSSM_W       | 0.001 |
| 714 | Site4_AA_7         | 0.001 |
| 715 | Site-11_PSSM_T     | 0.001 |
| 716 | Site-8_AA_17       | 0.001 |
| 717 | Site-3_AA_factor_5 | 0.001 |
| 718 | Site-14_AA_17      | 0.001 |
| 719 | Site-4_AA_7        | 0.001 |
| 720 | Site-2_AA_16       | 0.001 |
| 721 | Site-8_AA_8        | 0.001 |
| 722 | Site-5_AA_13       | 0.001 |
| 723 | Site-14_AA_16      | 0.001 |
| 724 | Site3_AA_factor_3  | 0.001 |
| 725 | Site-3_AA_20       | 0.001 |
| 726 | Site-1_AA_12       | 0.001 |
| 727 | Site4_PSSM_S       | 0.001 |
| 728 | Site-2_AA_6        | 0.001 |
| 729 | Site-4_AA_12       | 0.001 |
| 730 | Site4_AA_2         | 0.001 |
| 731 | Site-6_AA_15       | 0.001 |
| 732 | Site-2_Disorder    | 0.000 |
| 733 | Site-3_AA_9        | 0.000 |
| 734 | Site2_AA_14        | 0.000 |
| 735 | Site3_AA_19        | 0.000 |
| 736 | Site-8_AA_6        | 0.000 |
| 737 | Site-14_AA_7       | 0.000 |
| 738 | Site-3_AA_5        | 0.000 |
| 739 | Site-12_PSSM_G     | 0.000 |
| 740 | Site-5_AA_11       | 0.000 |
| 741 | Site-4_AA_11       | 0.000 |
| 742 | Site4_AA_3         | 0.000 |
| 743 | Site-8_AA_19       | 0.000 |
| 744 | Site3_AA_7         | 0.000 |
| 745 | Site3_AA_5         | 0.000 |
| 746 | Site1_AA_14        | 0.000 |
| 747 | Site-3_AA_7        | 0.000 |
| 748 | Site4_AA_9         | 0.000 |
| 749 | Site-1_AA_20       | 0.000 |
| 750 | Site-6_AA_7        | 0.000 |
| 751 | Site-13_PSSM_T     | 0.000 |
| 752 | Site-1_AA_5        | 0.000 |
| 753 | Site5_AA_3         | 0.000 |



|     |                    |       |
|-----|--------------------|-------|
| 754 | Site5_AA_18        | 0.000 |
| 755 | Site1_AA_7         | 0.000 |
| 756 | Site-7_AA_2        | 0.000 |
| 757 | Site-14_AA_20      | 0.000 |
| 758 | Site-14_AA_18      | 0.000 |
| 759 | Site5_AA_8         | 0.000 |
| 760 | Site-6_AA_6        | 0.000 |
| 761 | Site5_AA_7         | 0.000 |
| 762 | Site-4_AA_19       | 0.000 |
| 763 | Site-3_AA_8        | 0.000 |
| 764 | Site-13_AA_2       | 0.000 |
| 765 | Site2_AA_8         | 0.000 |
| 766 | Site0_AA_14        | 0.000 |
| 767 | Site0_AA_1         | 0.000 |
| 768 | Site-12_AA_6       | 0.000 |
| 769 | Site-1_AA_10       | 0.000 |
| 770 | Site-3_AA_11       | 0.000 |
| 771 | Site-6_PSSM_T      | 0.000 |
| 772 | Site-10_AA_19      | 0.000 |
| 773 | Site-12_AA_19      | 0.000 |
| 774 | Site3_PSSM_C       | 0.000 |
| 775 | Site-12_AA_17      | 0.000 |
| 776 | Site-13_AA_19      | 0.000 |
| 777 | Site5_AA_11        | 0.000 |
| 778 | Site-5_AA_5        | 0.000 |
| 779 | Site3_AA_11        | 0.000 |
| 780 | Site-12_AA_11      | 0.000 |
| 781 | Site-14_AA_19      | 0.000 |
| 782 | Site-4_AA_factor_5 | 0.000 |
| 783 | Site-5_AA_17       | 0.000 |
| 784 | Site-6_AA_17       | 0.000 |
| 785 | Site-11_AA_2       | 0.000 |
| 786 | Site-14_AA_1       | 0.000 |
| 787 | Site-9_AA_6        | 0.000 |
| 788 | Site-1_AA_11       | 0.000 |
| 789 | Site-7_AA_19       | 0.000 |
| 790 | Site3_AA_16        | 0.000 |
| 791 | Site-14_AA_9       | 0.000 |
| 792 | Site-11_AA_16      | 0.000 |
| 793 | Site2_AA_17        | 0.000 |
| 794 | Site3_PSSM_N       | 0.000 |
| 795 | Site4_AA_5         | 0.000 |

|     |                |       |
|-----|----------------|-------|
| 796 | Site-10_AA_2   | 0.000 |
| 797 | Site4_AA_15    | 0.000 |
| 798 | Site-10_AA_11  | 0.000 |
| 799 | Site3_AA_17    | 0.000 |
| 800 | Site4_AA_19    | 0.000 |
| 801 | Site-7_AA_20   | 0.000 |
| 802 | Site-12_AA_1   | 0.000 |
| 803 | Site-10_AA_1   | 0.000 |
| 804 | Site2_AA_7     | 0.000 |
| 805 | Site-14_PSSM_K | 0.000 |
| 806 | Site-12_AA_2   | 0.000 |
| 807 | Site2_AA_12    | 0.000 |
| 808 | Site2_AA_9     | 0.000 |
| 809 | Site5_AA_2     | 0.000 |
| 810 | Site-14_AA_2   | 0.000 |
| 811 | Site5_AA_10    | 0.000 |
| 812 | Site-13_AA_11  | 0.000 |
| 813 | Site5_AA_14    | 0.000 |
| 814 | Site-7_AA_8    | 0.000 |
| 815 | Site-7_PSSM_T  | 0.000 |
| 816 | Site-1_AA_15   | 0.000 |
| 817 | Site5_AA_15    | 0.000 |
| 818 | Site-5_AA_2    | 0.000 |
| 819 | Site4_AA_17    | 0.000 |
| 820 | Site-9_AA_2    | 0.000 |
| 821 | Site3_PSSM_M   | 0.000 |
| 822 | Site-6_AA_18   | 0.000 |
| 823 | Site-8_AA_2    | 0.000 |
| 824 | Site-9_AA_8    | 0.000 |
| 825 | Site4_PSSM_Y   | 0.000 |
| 826 | Site5_AA_9     | 0.000 |
| 827 | Site-11_AA_1   | 0.000 |
| 828 | Site2_AA_10    | 0.000 |
| 829 | Site-10_AA_5   | 0.000 |
| 830 | Site1_AA_5     | 0.000 |
| 831 | Site3_AA_8     | 0.000 |
| 832 | Site-11_AA_17  | 0.000 |
| 833 | Site2_PSSM_I   | 0.000 |
| 834 | Site3_AA_14    | 0.000 |
| 835 | Site-4_AA_17   | 0.000 |
| 836 | Site1_AA_11    | 0.000 |
| 837 | Site-7_AA_17   | 0.000 |

|     |                    |        |
|-----|--------------------|--------|
| 838 | Site-3_AA_17       | 0.000  |
| 839 | Site-4_AA_6        | 0.000  |
| 840 | Site-13_AA_17      | 0.000  |
| 841 | Site-1_AA_16       | 0.000  |
| 842 | Site1_AA_8         | 0.000  |
| 843 | Site-3_AA_6        | 0.000  |
| 844 | Site-10_AA_17      | -0.001 |
| 845 | Site2_AA_15        | -0.001 |
| 846 | Site3_AA_3         | -0.001 |
| 847 | Site-13_AA_18      | -0.001 |
| 848 | Site5_AA_16        | -0.001 |
| 849 | Site4_AA_20        | -0.001 |
| 850 | Site-2_AA_2        | -0.001 |
| 851 | Site3_AA_9         | -0.001 |
| 852 | Site2_AA_16        | -0.001 |
| 853 | Site-3_AA_14       | -0.001 |
| 854 | Site-4_AA_13       | -0.001 |
| 855 | Site2_AA_4         | -0.001 |
| 856 | Site-7_AA_16       | -0.001 |
| 857 | Site-6_AA_13       | -0.001 |
| 858 | Site4_AA_18        | -0.001 |
| 859 | Site-10_PSSM_G     | -0.001 |
| 860 | Site5_AA_20        | -0.001 |
| 861 | Site-7_AA_1        | -0.001 |
| 862 | Site-13_AA_6       | -0.001 |
| 863 | Site1_AA_12        | -0.001 |
| 864 | Site5_AA_5         | -0.001 |
| 865 | Site-9_AA_18       | -0.001 |
| 866 | Site1_AA_6         | -0.001 |
| 867 | Site-6_AA_factor_4 | -0.001 |
| 868 | Site3_AA_10        | -0.001 |
| 869 | Site-7_AA_6        | -0.001 |
| 870 | Site-4_AA_16       | -0.001 |
| 871 | Site-13_AA_1       | -0.001 |
| 872 | Site-3_AA_16       | -0.001 |
| 873 | Site-12_AA_16      | -0.001 |
| 874 | Site5_AA_1         | -0.001 |
| 875 | Site-8_AA_16       | -0.001 |
| 876 | Site5_AA_factor_3  | -0.001 |
| 877 | Site0_AA_6         | -0.001 |
| 878 | Site-1_AA_factor_3 | -0.001 |
| 879 | Site4_AA_factor_3  | -0.001 |

|     |                |        |
|-----|----------------|--------|
| 880 | Site5_PSSM_S   | -0.001 |
| 881 | Site-8_AA_1    | -0.001 |
| 882 | Site-9_AA_1    | -0.001 |
| 883 | Site-5_PSSM_T  | -0.001 |
| 884 | Site-6_AA_1    | -0.001 |
| 885 | Site-11_AA_19  | -0.001 |
| 886 | Site-13_PSSM_G | -0.002 |
| 887 | Site-3_AA_1    | -0.002 |
| 888 | Site-5_AA_10   | -0.002 |
| 889 | Site5_PSSM_T   | -0.002 |
| 890 | Site1_PSSM_W   | -0.002 |
| 891 | Site3_PSSM_A   | -0.002 |
| 892 | Site3_AA_2     | -0.002 |
| 893 | Site-8_AA_10   | -0.002 |
| 894 | Site3_PSSM_S   | -0.002 |
| 895 | Site-1_AA_4    | -0.002 |
| 896 | Site-10_AA_10  | -0.002 |
| 897 | Site-9_AA_17   | -0.002 |
| 898 | Site5_PSSM_E   | -0.002 |
| 899 | Site-14_PSSM_T | -0.002 |
| 900 | Site-13_AA_10  | -0.002 |
| 901 | Site-6_PSSM_S  | -0.003 |
| 902 | Site-3_AA_10   | -0.003 |
| 903 | Site-12_PSSM_T | -0.003 |
| 904 | Site-4_AA_3    | -0.003 |
| 905 | Site4_PSSM_A   | -0.003 |
| 906 | Site-7_PSSM_S  | -0.003 |
| 907 | Site5_PSSM_A   | -0.004 |
| 908 | Site-14_AA_15  | -0.004 |
| 909 | Site5_PSSM_P   | -0.004 |
| 910 | Site-4_PSSM_W  | -0.004 |
| 911 | Site5_PSSM_K   | -0.005 |
| 912 | Site5_PSSM_N   | -0.005 |
| 913 | Site4_PSSM_C   | -0.005 |
| 914 | Site-5_PSSM_S  | -0.005 |
| 915 | Site3_PSSM_T   | -0.005 |
| 916 | Site-5_PSSM_P  | -0.006 |
| 917 | Site3_PSSM_Y   | -0.006 |
| 918 | Site3_PSSM_E   | -0.006 |
| 919 | Site4_PSSM_T   | -0.007 |
| 920 | Site3_PSSM_Q   | 0.000  |
