# Supplementary material for: Identification and analysis of the cleavage site in a signal peptide using SMOTE, dagging, and feature selection methods
Source: Royal Society of Chemistry journal article supplement (doi:10.1039/c7mo00030h), 2017-12-20
Supplement: c7mo00030h1.zip [file c7mo00030h1.zip]

**Supplementary Material S3.** Positive and negative peptide segments derived from the 2,683 sequences with experimentally validated signal peptides.

| Uniprot ID | Peptide segment       | Positive or Negative |
|------------|-----------------------|----------------------|
| A0AT29     | VLVICMVVIAPMAEGAISCG  | Positive             |
| A0AT32     | VLVMCMVVIAPMAEGAISCG  | Positive             |
| A0P8X0     | GGLLIVPAAAPPVSADIAAT  | Positive             |
| A0QR29     | AAIAALFTSTGTSHAGLDNE  | Positive             |
| A1BQQ5     | AILMLSIVFVAGTKRHACDS  | Positive             |
| A1C3L3     | GALTGATVVSGNVFADETVL  | Positive             |
| A1X158     | NILTLFAVLIGSASAVYHPP  | Positive             |
| A1X159     | NILTLFAVLLGSASAVYHPP  | Positive             |
| A1XRN2     | LLSGLLLLGTFLANGDEKDS  | Positive             |
| A2AEP0     | FLLALVFGLAHVHAHDHPE   | Positive             |
| A2AJB7     | MLFTLLGLCVGLAAGTEAAV  | Positive             |
| A2CKF7     | TLVVVTIVCLDLGYTLTCLI  | Positive             |
| A2SY66     | LLYLFSLATLLAVVTGTGTP  | Positive             |
| A2TJI4     | ILGVILAMGSLSAIAGGGNS  | Positive             |
| A2VBC4     | KYSILFICFGTLDRGLIPEC  | Positive             |
| A3DH67     | VAMLVSIMIPTTAFAGPTKA  | Positive             |
| A3RF67     | LVSTSASIAFAKEVRATITE  | Positive             |
| A3RJ36     | LLFLVLSAGSGFTQGVRNSQ  | Positive             |
| A4QD57     | TAASAPLVAASPAHALANAR  | Positive             |
| A4QFQ3     | VALGATAAIASPAQAAEVVV  | Positive             |
| A5F7A4     | ALMLAMFGMATSSNAALFDY  | Positive             |
| A5HAK0     | AVVLLLLCASLSTYGQPAEI  | Positive             |
| A6MEY4     | CVSLLGAANIPPQSLNLYQF  | Positive             |
| A6P6V9     | IIFFFSFNIQTSIANPREN   | Positive             |
| A6QIG7     | FLTAGISTHHHSAKAFTFEP  | Positive             |
| A7L035     | FFAFLPLL FMTGIAAESTIS | Positive             |
| A7L036     | LVSLPLL FMTGIASESTIS  | Positive             |
| A7VN13     | FSLIIFSFTLATCQGVCAPR  | Positive             |
| A7VN14     | FSLIIFSFTLATCQGACGIG  | Positive             |
| A7VN15     | FILIIFSFTLATCQGE CYGS | Positive             |
| A8CG78     | RTLWIVAVCLIGVEGNLYQF  | Positive             |
| A8CG86     | RTLWIVAVCLIGVEGNLFQF  | Positive             |
| A8CG89     | RTLWIVAMCLIGVEGNLFQF  | Positive             |
| A8CG90     | RTLWIVAVCLIGVEGNLLQF  | Positive             |
| A8CL69     | CVLLCVVYLLSYASGEYDGR  | Positive             |
| A8E2V8     | RTLWIMAVLLLGVESLMQF   | Positive             |
| A8QL52     | SIFSLVFLAAFGSCADDRRS  | Positive             |
| A8QL58     | FIFSLFLAALESCADDRRS   | Positive             |
| A8Y7P1     | LGLLTLWAELTPISGHDRPK  | Positive             |
| A9Q0M7     | FENIKLFSLKKIIGGKTVNY  | Positive             |
| A9UGV5     | AVVVVASSLVGTASAADAPA  | Positive             |
| A9UGV6     | FAVVAAAALATVASAADAPA  | Positive             |

|        |                      |          |
|--------|----------------------|----------|
| A9UGV7 | VAAVAVSSLAGVAYAADAPA | Positive |
| A9XE60 | LVVLLFLGMVALSSCGFREK | Positive |
| B0B815 | AVTIFAVTSVASLFASGVLE | Positive |
| B0FHH8 | LHWLLLAALLGCTLAEEQAI | Positive |
| B0JFB8 | ITLLFLACILVVTYGDLICG | Positive |
| B0XRV0 | FRWLSIAAAASTALALTPEQ | Positive |
| B0XT72 | AVTAALAVGASTVLAAPSIK | Positive |
| B1B5I8 | YFLLCLALVACLTMATEEMP | Positive |
| B1P0S1 | GQFIFLFWTISITEANIDPA | Positive |
| B2BRQ5 | TLVVVTIVCLDFGGGLICYM | Positive |
| B2G331 | CLILIAGFSFKSTQAGSICL | Positive |
| B2KNH9 | IFLLSLALFSTLVSADNHLL | Positive |
| B2KTG1 | LGLLTLWTELTPVSSLGGPA | Positive |
| B2RIT0 | AASIIGSAAMTPSAGTNTGE | Positive |
| B2RKV3 | LLGAALLLGASGVAKADKGM | Positive |
| B3A003 | LFLFCVATTAALAYGSDAPC | Positive |
| B3EWP3 | LVLFLAQEGVVKTEAKLCNH | Positive |
| B3EWP4 | FFLILFLAQEYGVGKECLN  | Positive |
| B3EWY1 | LIALVICSISICTEAFGLID | Positive |
| B3F051 | FIVLFVAQEIAVTEAKTCEN | Positive |
| B3STN5 | LATASFVLSLGFVKAEPTRH | Positive |
| B3STN7 | SVVILAMSYITSIFANNSYD | Positive |
| B5AR80 | FFMFSLFLAALGSCADDGN  | Positive |
| B5LZ79 | LLLSSREMVPGAEARLCRV  | Positive |
| B5U6Y4 | RALWIVAVWLIGVEGSVEL  | Positive |
| B5U6Z2 | RTLWIVAVCLMGVEGHLTQF | Positive |
| B6RLX2 | GLLTLWAELTPVSGLGRPKF | Positive |
| B7FDP2 | LMITACFFLIGTVWAKEGYL | Positive |
| B7JAQ0 | AAALAATVGMGTAMAGTLDT | Positive |
| B7S4N9 | LGLLTLWEVLTPVSSKDRPK | Positive |
| B7SNV8 | LVLTLASLLALGVNGKKDGY | Positive |
| B7ZS96 | KSFLLLALLAIVSEAAPPGH | Positive |
| B8AL97 | ISLCFLSLASNAVGWSRRGE | Positive |
| B8M9H9 | PLVLLLAWLLPTVFAASLTQ | Positive |
| B9A8D7 | AVVVALLCFVCYTAAETCSA | Positive |
| C0HJQ4 | VTLFVCSMIIGICEGREIPV | Positive |
| C0HJQ5 | FNVIMTIMPDMKVEAVSCED | Positive |
| C0HJQ8 | LLLALVICSIGWSEAQFTDV | Positive |
| C0HJZ1 | FFLVFLAQEYGVGKVCN    | Positive |
| C0K3N1 | ILFCIQGWPSGTVQGEVRPF | Positive |
| C1IC47 | TLVVVTIVCLDLGHTFVCHN | Positive |
| C1IC48 | TLVVVTIVCLDLGHTLLCHN | Positive |
| C1IC49 | TLVLVTIVCLDLGYTLTCLI | Positive |
| C1IC50 | LGLLTLWAELTPVSGRPGLC | Positive |
| C1IC52 | LGLLTLWAELTPVSGRPRLC | Positive |
| C1IC53 | LGLLTLWAELTPISGLGGPK | Positive |

|        |                       |          |
|--------|-----------------------|----------|
| C4NZN9 | RVLLILVSLAALAHAESEFLK | Positive |
| C5J887 | MIAVVLMQMLVQTEGGILGK  | Positive |
| C5P3X6 | SVPVLALAFGSLAAAAPNAG  | Positive |
| C6JUN9 | LCLMPIFLSLSGAECYTCPI  | Positive |
| C6JUP1 | TLVVVTIVCLDLGNSLICYN  | Positive |
| C6JUP2 | TLVVVTIVCLDLGNTANTLF  | Positive |
| C6JUP3 | TLVVVTIMCLDLGYTLVCYT  | Positive |
| C6XZB6 | FVVVELMVFTTKGYSQTKAD  | Positive |
| C7G1H4 | TLTVDEISKIQTNGGKPAWC  | Positive |
| C7G3K3 | VMFLVIMVISSLVDCAKKPF  | Positive |
| C9K4X8 | VLLLLHAAFHGGALGEKYCD  | Positive |
| C9X4J8 | LFLSCFFLIGMVVECKDGYL  | Positive |
| C9X4J9 | LFISCLMLIDVVVESRDAYP  | Positive |
| C9X4K1 | MLISCLMLIDVVVESKNGYI  | Positive |
| C9X4K4 | MLISCLMLIEVVVGKEGYL   | Positive |
| C9X4K7 | AVALLFIGLELREARDGYP   | Positive |
| D0UGJ0 | RTLWIMAVLLVGVEGNLVQF  | Positive |
| D1MGU0 | FGLLVVFLSLSGTGADCPFD  | Positive |
| D3JXM1 | LIALIICSISICTEAFGLID  | Positive |
| D3RVD4 | IAAAWLLAVGLVAHAEPPPT  | Positive |
| D4A540 | ALLLLLCLGPGDVSGNKLKK  | Positive |
| D5QVH0 | AASVAFVAVTAGQAVAAGDPA | Positive |
| D7A6E5 | LALLVLPFVLTGARAAEDES  | Positive |
| D7UQ40 | LGITPSVVGHSOPHRQETQN  | Positive |
| E0D877 | VIFLLSSFAAVVWAMDNP    | Positive |
| E1V825 | ATAIAGAMAASGAQAATVYN  | Positive |
| E1VBK1 | SIGALMLGMSTAAYSNDRY   | Positive |
| E1XUJ2 | SAAALLAGFGPPPRAAELPP  | Positive |
| E2DQZ5 | FGLLVVFLSLSGIGAGFCCP  | Positive |
| E2DQZ6 | FGLLVVFLSLSGTGADFDCI  | Positive |
| E3PPC4 | AMALTTMFVAVSASAVEKNI  | Positive |
| E3W9M2 | WLLLVLVFGVESSMFSEFDR  | Positive |
| E6Y8S8 | MLMVVVINHPAVVEGLTCGQ  | Positive |
| E7BLC7 | IIFLVLMMLSEVYSRDRGY   | Positive |
| E7CLP2 | LIFIIASFMLIGVECKEGYP  | Positive |
| E9K9Z1 | TLTISEISKAQNNGGKPAWC  | Positive |
| F1AWB0 | VVFLIGMLVTEQVEAGIWSS  | Positive |
| F1N5C8 | LLLALVLSLAQPASARRKLL  | Positive |
| F1NSM7 | TLFCLCLCLLGTVLPTVSL   | Positive |
| F5CPD3 | TLVVVTIVCLDLGNTRICDD  | Positive |
| F5CPD5 | TLVVVTIVCLDFGHTMICYN  | Positive |
| F5CPD8 | TLVVVTIVCLDFGHTMICYN  | Positive |
| F5CPE2 | TLVVVTIVCLDLGNSLICYN  | Positive |
| F5CPE3 | TLVVVTIVCLDFGHTVTCHK  | Positive |
| F5CPE4 | TLVVVTIVCLDFGHTLICYN  | Positive |
| F7J1C8 | LACLAAPGTFFVDAATVIP   | Positive |

|        |                       |          |
|--------|-----------------------|----------|
| F8QN53 | RILWIVAVCLIGVEGNLYQF  | Positive |
| F8S0Y4 | IVLPILAAVLQQSSGSVDFD  | Positive |
| F8WQK8 | PTLLLAFCSTLAYADGGMW   | Positive |
| G3XDA8 | LTFVAAGVGAASAVAAIDPA  | Positive |
| G4V4F9 | FVFAVGIMLSMRASAFTCP   | Positive |
| G5EC68 | VRSLFLALLLATIVAADIDF  | Positive |
| G5ED35 | IYFLPFFIYSGNVLSKTSCL  | Positive |
| G8XQX1 | FFMFSLLFLATLGSCADDKN  | Positive |
| G8YYA5 | TVFLVLLIGSDYCQAFSL    | Positive |
| G8YYA6 | TVFLVLLIVSDHCQAFPSL   | Positive |
| G9I930 | CVSLLGASSIPPQALNLNQF  | Positive |
| G9M8X1 | IYLLVVVCWAAAAANASSDTV | Positive |
| I0J1I6 | ALSLGMALLQNPFAAPPLS   | Positive |
| I2C090 | LVAALLIGFPGSSHGALYTL  | Positive |
| I6RA76 | KFAVLFFTLFLLALAINVT   | Positive |
| I6RU32 | LVMALIMFSLDKSYSTDDES  | Positive |
| I6S390 | IFAIVVCMNTDVIQAEESQH  | Positive |
| I6S7G5 | SWMFYSFIVFTLAIKEVIAI  | Positive |
| I6S7I0 | KFAALVITLFLVLAINVT    | Positive |
| I7ICN3 | SGLLVVFLSLSGTGADQGCL  | Positive |
| I7JUQ0 | SGWLVVFLSLSGTGADEGCL  | Positive |
| J7H670 | FFMFSLLFLAALGSCADDRN  | Positive |
| K4LAH1 | ASLSVAALVSAQAMAEINGG  | Positive |
| K7XWG4 | TILALCCVAIWVVESIGIEV  | Positive |
| L0DSL2 | IAGAACFLASAAHAEPGEN   | Positive |
| L8BRS3 | PIFFLFSLLFSSSHGAIQDF  | Positive |
| O00092 | YLLSGRVSAAPSSAGSKSCD  | Positive |
| O00100 | VVLLSIATLFGSTSGTALGP  | Positive |
| O00105 | GYLLTLAAAFQVAQAAVTAN  | Positive |
| O00175 | LFLGVCAHHIPTGSVVIPS   | Positive |
| O00300 | CALVFLDISIKWTTQETFP   | Positive |
| O00585 | LLILVLAFGIPRTQGSDGGA  | Positive |
| O00602 | LLVLFLHIKNLPAQAADTCP  | Positive |
| O00626 | VVLVLLAVALQATEAGPYGA  | Positive |
| O00748 | AVACGLLLLLVRGQGQDSAS  | Positive |
| O02826 | GTLVVLATFVTLCNSQCYFI  | Positive |
| O02853 | LGVLGVLQTPAPAQAALQPN  | Positive |
| O04004 | AVGLLLVSWRPTMFAASPTC  | Positive |
| O05465 | SVLISTLLISETAQAADAND  | Positive |
| O05512 | IFLLASAVLAKPIEAHTVSP  | Positive |
| O07532 | SAIVGTTLVVTPEAATIKV   | Positive |
| O07834 | AATVLMSTPITSALAASATP  | Positive |
| O07921 | FTMFFTLMMSETVFAAGLNK  | Positive |
| O08498 | SLILALGLTSLQAFQENPD   | Positive |
| O08523 | WVSFIFALVRHQAQPRELMY  | Positive |
| O09049 | WMLLSCLMLLSQVQGEVAKK  | Positive |

|        |                        |          |
|--------|------------------------|----------|
| O09165 | LFVLVLGTPRLGVQGEDGLD   | Positive |
| O11780 | PLALALALGPAATHAGPAKS   | Positive |
| O13547 | SSVVSLALLSKEVLATPPAC   | Positive |
| O14412 | LISKTMAAPAPAPVPGTAWN   | Positive |
| O14625 | AIALAVILCATVVQGPFMFK   | Positive |
| O14773 | ACLLGLFALILSGKCSYSPE   | Positive |
| O14791 | CIWMSALFLGVGVRAEEAGA   | Positive |
| O14798 | VVVIVAVLLPVLAYSATTAR   | Positive |
| O15467 | SLLVLILIITSASRSQPKVP   | Positive |
| O18330 | FMLVCLGIVCQGTGNILRG    | Positive |
| O18994 | AFYLFPLFMAGFVQTNSNLE   | Positive |
| O18998 | TALLTLAVLLQVAGSLKIAA   | Positive |
| O25825 | IMALGVLAFAFANALMATDVKA | Positive |
| O30434 | IFGLVVTNFGTKVDAATRSY   | Positive |
| O31737 | AALFTIGFPAQQADAAEAPY   | Positive |
| O31803 | GIPGLPAADAQVAKAASELP   | Positive |
| O33434 | AATALGLALAGAAFADPVED   | Positive |
| O33599 | TMGFATFTMAHQADAAETTN   | Positive |
| O33731 | AAGFAVMMMSSASFAAETL    | Positive |
| O34214 | SVPVSGYSRGEQVTVANELK   | Positive |
| O34215 | ILALVLGTLFSAALADDQAN   | Positive |
| O34313 | IMILSLILPTPIHAEEESAA   | Positive |
| O34344 | VFSLVGLSKESSTSAKENHT   | Positive |
| O35314 | LLGLLGAAALAAVISAPVDN   | Positive |
| O35701 | LLLLLWPLLLPLSLAAPGRL   | Positive |
| O35744 | VTGLAILLNVQLGSSYQLMC   | Positive |
| O35806 | FLPLVLALLMGTSQAQRDSV   | Positive |
| O42257 | TLVLVTIMCLDLGYTIRCFI   | Positive |
| O42446 | CSLGLFLTLLHLSNSLLLGA   | Positive |
| O42720 | SAAPGGLAPENASKRDQPSV   | Positive |
| O42807 | KYALILLATAGQALAASTQG   | Positive |
| O43278 | ALWLLCTLGLQGTQAGPPPA   | Positive |
| O43653 | LALLMAGLALQPGTALLCYS   | Positive |
| O43827 | LCIFIVAFVSHPAWLQKLSK   | Positive |
| O43852 | QFLMCLSLCTAFALSKPTEK   | Positive |
| O43866 | FSLILAICTRPGFLASPSGV   | Positive |
| O46162 | LALCAAFLLVVLVQAEQECT   | Positive |
| O46167 | LQLMICLVLLPCFFCEPDEI   | Positive |
| O46654 | LLLCLAGLVLVTEAGPTGT    | Positive |
| O46655 | TSLALALIALEAALALAPAL   | Positive |
| O48540 | ICGLFLLFLALVCEANSGLFI  | Positive |
| O48818 | AILFTTFVLFLSLADARIPGI  | Positive |
| O50319 | VFVLTLMFLSFGTLGQETAS   | Positive |
| O52055 | TLAGASALATLPANAFWGWGN  | Positive |
| O52057 | ALAALFAGASFSASAWWGGP   | Positive |
| O52179 | AAVAALLGASASASAWWGPG   | Positive |

|        |                      |          |
|--------|----------------------|----------|
| O54081 | GLIAPLASPIQESRANTNIE | Positive |
| O54082 | ASSIALLLLSNTVDAAQNIT | Positive |
| O55038 | TLLLLLASCLSPGHGILEAH | Positive |
| O55232 | LLLLPPALLSLGVDAQPLPD | Positive |
| O55245 | MLLVFLAGLVFLTEAAPLVS | Positive |
| O57385 | RALWIVAVLLVGVEGSLFEL | Positive |
| O57690 | HIICLLFIFVARGNSRSCDF | Positive |
| O59896 | LLSFVLVSLAAVANAAIGPV | Positive |
| O60046 | LSLSLLASATVGVLAEEELG | Positive |
| O60565 | ALLLLLGTTLPAAEGKKKGS | Positive |
| O60609 | LLLLPPSPLPLAAGDPLPT  | Positive |
| O60844 | LTVALLALLCASASGNAIQA | Positive |
| O61668 | FLIFLVIFPIMGVLGKKNGY | Positive |
| O61705 | VMISFALLLMKGVESVRDAY | Positive |
| O62605 | LKFIIFALTVALCEAGPANN | Positive |
| O62644 | TGTLLLAALISPALAGPWAI | Positive |
| O62680 | WLLSILAVLCHLGHSLQCYN | Positive |
| O64392 | LVVALLCAAAAAATAQQATN | Positive |
| O64393 | LVAALLCAAAAAATAQQATN | Positive |
| O64411 | ALLALSQAQHGSLAATVGP  | Positive |
| O68900 | LLSLAVISYTNIIYAANMDI | Positive |
| O70165 | WPTLWAFSGLLCLCPSQALG | Positive |
| O70280 | LSFLLLLLGSSSVQGTWEAM | Positive |
| O75462 | LLLCVLGAPRAGSGAHTAV  | Positive |
| O75556 | LMVLMLAALLLHCYADSGCK | Positive |
| O75596 | ICILVITLLLDQTTSHTSRL | Positive |
| O75629 | LASTLLALLVSPARGRGRD  | Positive |
| O75636 | SLWLLLGGPACLKTQEHP   | Positive |
| O75711 | LVFTIGLTLLLGVQAMPANR | Positive |
| O76076 | LLAFSLLCLLSKVRTLQCP  | Positive |
| O76192 | TKILIFLSFVALSSAGFVWV | Positive |
| O76537 | EILFVLFFVFVTVSGDCGVV | Positive |
| O76942 | LSASIALMKLENVYSATALC | Positive |
| O77061 | RWLFMVACLGIACQGAIVRE | Positive |
| O77463 | ILFISCLLLIDIVVGGREGY | Positive |
| O77541 | LRLFLAVFYSSDSSLMCY   | Positive |
| O77801 | TWALVLLGPALAIALGPAAA | Positive |
| O80323 | VFLLVILCSSTVGYDYFQ   | Positive |
| O80327 | GLVLVFLSEHAGVYSAKFTF | Positive |
| O82337 | LFSFVFAVILSLAGAQSLAP | Positive |
| O82833 | IVYPAASGRGAVASAASGTT | Positive |
| O86308 | LAGAAAVGFSAPAQAATVDT | Positive |
| O88093 | VLLLIPVLFSAGSLAGTVNN | Positive |
| O88188 | AAALLVWILTSPSSSDHGSE | Positive |
| O89093 | LAWVLLAHLCSQAEASNYD  | Positive |
| O93233 | LIACLVMSLNSYTQQVLYCP | Positive |

|        |                       |          |
|--------|-----------------------|----------|
| O93426 | FGLLVFLSLSGTGAGLHCP   | Positive |
| O93427 | FGLLVVFLSLSGSEAGFCCP  | Positive |
| O94907 | VAAALGGHPLLGVSATLNSV  | Positive |
| O95157 | FVFLVQGSYL VICGQDDGP  | Positive |
| O95407 | VLALPALLPVPVAVRGVAETP | Positive |
| O95633 | LPWGALAWAVGVFSSMSGN   | Positive |
| O95711 | ATLFLWTLIFPSCSGGGGK   | Positive |
| O95715 | LLLLLLALYTARVDGSKCKC  | Positive |
| O95750 | VWILAGLWLAVAGRPLAFSD  | Positive |
| O95813 | LLLFQLLVLLPLGKTTRHQD  | Positive |
| O95881 | LLGFSFLLLVISSDGHNGLG  | Positive |
| O95968 | LLLLTLALCCYRANAVVCQA  | Positive |
| O95994 | VSAFLLLVALSYTLARDDTV  | Positive |
| O95998 | VLLCAHVVTLLVRATPVSQ   | Positive |
| O96559 | LLLSLVLSFMLVQSYELGH   | Positive |
| O96910 | AIILSLALVA AVFADQNCD  | Positive |
| O97763 | AAAFLLLTLASASALAEVHF  | Positive |
| O97939 | KILLVFLGLLCYSAAMPMQM  | Positive |
| P00082 | AMVGAALVWSASAYAAGDPV  | Positive |
| P00083 | FGLFVLAASVAPAAAQDAAS  | Positive |
| P00091 | IAATAGSLSIGTASAQDAKA  | Positive |
| P00094 | AATVAALVLAAPAFAGDAAK  | Positive |
| P00096 | YATLAAITLALPAAAQDGDA  | Positive |
| P00099 | SLLATGTLLAQGAWAEDPEV  | Positive |
| P00101 | MLALGGALAMQPALAQDGEA  | Positive |
| P00106 | VSLLTLGLTGLAHAAGDAA   | Positive |
| P00120 | SICAAAFGVSAAMAADGAA   | Positive |
| P00131 | GVLALAVAFALPVVAAPKAP  | Positive |
| P00132 | VLALAVAIAMPALAAAPKAP  | Positive |
| P00144 | VAALAALTTTVAQAADPAA   | Positive |
| P00148 | LLATLMAALPAAAMAADA EH | Positive |
| P00149 | TIAGLVVLGSGFAVAQTDVI  | Positive |
| P00150 | IVAGALVLTASAVMAQQDLV  | Positive |
| P00154 | AAGLMALGLASSAIAAGLSP  | Positive |
| P00260 | AIPMINLVGFGTARASAPAN  | Positive |
| P00280 | TLAIVLSAASLPVLA AQCEA | Positive |
| P00282 | AAVSLLSLLSAPLLAAECSV  | Positive |
| P00433 | IPLVCLILHASLSDAQLTPT  | Positive |
| P00446 | LFTALAFGLSHQALAQDLTV  | Positive |
| P00450 | ILGIFLFLCSTPAWAKEKHY  | Positive |
| P00588 | IGALLGIGAPPSAHAGADDV  | Positive |
| P00615 | CVSLLGASDIPPLPLNLVQF  | Positive |
| P00616 | HLLVLLAVCVSLLGSSEIPQ  | Positive |
| P00623 | RTLWIVAVLLLGVEGSLVQF  | Positive |
| P00625 | RTLWIMAVLLLGVEGHLMQF  | Positive |
| P00635 | KSVVYSILAASLANAGTIPL  | Positive |

|        |                       |          |
|--------|-----------------------|----------|
| P00639 | GLLLALAGLLQLGLSLKIAA  | Positive |
| P00651 | LLLPTALALPSLVERACDYT  | Positive |
| P00652 | LLVPALAAPQGLDVRDCDYT  | Positive |
| P00655 | TAVTALAVSPLEARAVTWT   | Positive |
| P00669 | LVLVLLLVRVQPSLGKESAA  | Positive |
| P00683 | PLFFLLLGWVQPSLGRESAA  | Positive |
| P00684 | SLLVLVLGWVQPSLGGESRE  | Positive |
| P00692 | CTLLFVSLPITKTSAVNGTL  | Positive |
| P00697 | LLVLGFLLLSASVQAKIYER  | Positive |
| P00698 | LLILVLCFLPLAALGKVFGGR | Positive |
| P00701 | LLVLVLCFLPLAALGKVYGR  | Positive |
| P00702 | SLLILVLCFLPLAAPGKVYG  | Positive |
| P00703 | LLILVLCFLPLAALGKVYGR  | Positive |
| P00705 | LLTLVFCLLPLAAQGKVYSR  | Positive |
| P00709 | VPLFLVGILFPAILAKQFTK  | Positive |
| P00712 | VSLLLVGILFHATQAEQLTK  | Positive |
| P00713 | FPLLLVGILFPAVQAKQLTK  | Positive |
| P00714 | VPLFLACISLPAFQATEFTK  | Positive |
| P00716 | VPLLLVSIVFPGIQATQLTR  | Positive |
| P00719 | LVLLGLAALLGTSQSRTGCY  | Positive |
| P00724 | AFLFLLAGFAAKISASMTNE  | Positive |
| P00730 | QGLLILSVLLGAALGKEDFV  | Positive |
| P00733 | APTATASASADV GALDGCYT | Positive |
| P00736 | LLYLLVPALFCRAGGSIIP   | Positive |
| P00738 | LGAVIALLLWGQLFAVDSGN  | Positive |
| P00739 | LGAVISLLLWGRQLFALYSG  | Positive |
| P00747 | EVVLLLLLFLKSGQGEPLDD  | Positive |
| P00748 | LLLGFLLVSLESTLSIPPWE  | Positive |
| P00749 | ARLLLCVLVVSDSKGSNELH  | Positive |
| P00750 | LCCVLLLCGAVFVSPSQEIH  | Positive |
| P00751 | LMPFILGLLSGGVTTTPWSL  | Positive |
| P00757 | FLILFLALS LGGIDAAPPVQ | Positive |
| P00760 | TFIFLALLGA AVAFPVDDDD | Positive |
| P00773 | LRFLVFASLVLYGHSTQDFP  | Positive |
| P00779 | LLFALTFGTVNSVQAIAGPE  | Positive |
| P00794 | RCLVVLLAVFALSQGAEITR  | Positive |
| P00797 | RWGLLLLLWG SCTFGLPTDT | Positive |
| P00805 | ALAALVMGFSGAALALPNIT  | Positive |
| P00811 | TLCALLITAS CSTFAAPQOI | Positive |
| P00987 | LGLLTLCAELIPVSSRQRHR  | Positive |
| P00989 | LGLLTLCAELTPVSSRKRHP  | Positive |
| P00991 | LGLLTLWAE LTPVSGQDHPK | Positive |
| P00992 | LGLLTLWAE LTPVSTRDRPK | Positive |
| P00995 | LSALALLSLSGNTGADSLGR  | Positive |
| P00996 | LTALVLM SLSGNSGANILGR | Positive |
| P01001 | LLSLALFCFFSGVFGQGAQV  | Positive |



|        |                      |          |
|--------|----------------------|----------|
| P01005 | FSFVLCGFLPDAAFGAEVDC | Positive |
| P01006 | PSAAPLSGAALAAPGDAPSA | Positive |
| P01008 | LLSLLLIGFWDCVTCHGSPV | Positive |
| P01009 | LLLAGLCCLVPVSLAEDPQG | Positive |
| P01011 | ALGLLAAGFCPAVLCHPNSP | Positive |
| P01015 | ATIFCILTWVSLTAGDRVYI | Positive |
| P01019 | ATILCLLAWAGLAAGDRVYI | Positive |
| P01023 | PSLVLLLLVLLPTDASVSGK | Positive |
| P01024 | SLLLLLLTHLPLALGSPMYS | Positive |
| P01027 | LVLLLLLASSPLALGIPMYS | Positive |
| P01033 | SGILLLLWLIAPSRACTCVP | Positive |
| P01034 | LAILAVALAVSPAAGSSPGK | Positive |
| P01036 | CTLLLLMATLAGALASSSKE | Positive |
| P01037 | STLLLLLATLAVALAWSPKE | Positive |
| P01038 | VLLAAALMLVGAVLGSEDRS | Positive |
| P01042 | ITILFLCSRLLSLTQESQS  | Positive |
| P01045 | ITILFLCSRLLPSLTQESSQ | Positive |
| P01048 | ITILLCSRLLPSLAQEEGA  | Positive |
| P01068 | LLFLHEVINGERVTLTACSE | Positive |
| P01070 | LFCAFTTSYLPSAIADFVLD | Positive |
| P01076 | AQDVMAQDATLTKLFQQYDP | Positive |
| P01077 | TLVLGAVGFTAPAQAAPSCP | Positive |
| P01083 | VATTMAVEYGARSHNSGPWS | Positive |
| P01086 | SAAVMLAILVATATSFGDSC | Positive |
| P01088 | LAAAVLLSVLAAASASAGTS | Positive |
| P01092 | AALALSPLAAGPASADTTVS | Positive |
| P01137 | LLWLLVLTPGRPAAGLSTCK | Positive |
| P01148 | AGLILLTWCVEGCSSQHWYS | Positive |
| P01161 | FFLFLAFWLPGHIGANPVYS | Positive |
| P01165 | GLVLWLTFGWTPALAYSPT  | Positive |
| P01168 | LAALSIVLALGGVTGAPSDP | Positive |
| P01170 | LALLALVLCGPSVSSQLDRE | Positive |
| P01174 | ISLVGLLALVALARNLQE   | Positive |
| P01175 | SLACCLLGLLALTSACYIQN | Positive |
| P01180 | TLPACFLSLLAFTSACYFQN | Positive |
| P01183 | TLPACFLGLLALTSACYFQN | Positive |
| P01185 | MLPACFLGLLAFSSACYFQN | Positive |
| P01189 | LLLALLLQASMEVRGWCLES | Positive |
| P01215 | IFLVTLVFLHVLHSAPDVQ  | Positive |
| P01217 | VILAILSLFLQILHSFPDGE | Positive |
| P01218 | AILAILSLFLQILHSFPDGE | Positive |
| P01221 | ASILLFFMLIRLGQLYPRND | Positive |
| P01222 | LMSMLFGLTCGQAMSFCIPT | Positive |
| P01223 | LMSMIFGLACGQAMSFCIPT | Positive |
| P01224 | LMSMLFGLACGQAMSFCIPT | Positive |
| P01225 | LQFFFLFCCWKAICCNSEL  | Positive |

|        |                       |          |
|--------|-----------------------|----------|
| P01226 | VQFCFLFCCWKAIVCCNSCEL | Positive |
| P01227 | QFCFLFCCWRAICCRSCELT  | Positive |
| P01228 | FCFLFCCWKAICCNSELTN   | Positive |
| P01229 | GLLLLLLLSMGGAWASREPL  | Positive |
| P01232 | GLLLWLLLSVAGVWASRGPL  | Positive |
| P01235 | HILFSVVVLLAVAQSSYLPP  | Positive |
| P01236 | LLLVSNLLLCQSVAPLPICP  | Positive |
| P01237 | LLMMSNLLFCQNVQTLPVCS  | Positive |
| P01238 | LLLVSNLFLCKSVASLPICP  | Positive |
| P01239 | LLVVSNNLLCQGVVSTPVC   | Positive |
| P01241 | AFGLLCLPWLQEGSAFPTIP  | Positive |
| P01242 | AFGLLCLSWLQEGSAFPTIP  | Positive |
| P01245 | AFGLLCLPWPQDVGAFFAMP  | Positive |
| P01246 | LAFALLCLPWTQVVGAFFAMP | Positive |
| P01248 | AFALLCLPWTREVGAFAMP   | Positive |
| P01268 | MIVMLAICFLARSDGKSVKK  | Positive |
| P01269 | MVVMLAICFLARSDGKPIKK  | Positive |
| P01270 | MIVMLAICFLTKSDGKSVKK  | Positive |
| P01274 | FVAGLFVMLVQGSWQRLQN   | Positive |
| P01299 | ACVALLLQPPLGTRGAPLEP  | Positive |
| P01301 | TCVALLLQPPLGALGASLEP  | Positive |
| P01302 | TCVALLLQPPLGALGAPLEP  | Positive |
| P01303 | LALSLLVCLGALAEAYPSKP  | Positive |
| P01307 | LVVHAAAMLASHTAEFVPIF  | Positive |
| P01308 | LLALLALWGPDPAAAFVNQH  | Positive |
| P01311 | LLALLVLCRLDPAQAFVNQH  | Positive |
| P01313 | LLTLLVLWEPNPAQAFVNQH  | Positive |
| P01315 | LLALLALWAPAPAQAFVNQH  | Positive |
| P01317 | LLALLALWPPPPARAFVNQH  | Positive |
| P01318 | LLALLALWAPAPAHAFVNQH  | Positive |
| P01321 | LLALLALWAPAPTRAFVNQH  | Positive |
| P01322 | LLALLVLWEPKPAQAFVKQH  | Positive |
| P01323 | LLALLILWEPRPAQAFVKQH  | Positive |
| P01325 | LLALLALWEPKPTQAFVKQH  | Positive |
| P01326 | LLALLFLWESHPTQAFVKQH  | Positive |
| P01329 | VLALLALWGPNTGQAFVSRH  | Positive |
| P01335 | AGALLFLLAVSSVNANAGAP  | Positive |
| P01342 | PLVLLLSRAPPSADTRTTGH  | Positive |
| P01344 | LVLLTFLAFASCCIAAYRPS  | Positive |
| P01346 | LVLLISLAFALCCIAAYRPS  | Positive |
| P01347 | QLLGFWLFLSQPCRARVSEE  | Positive |
| P01348 | GVWLLLSQLPREIPGQSTND  | Positive |
| P01350 | YVLIFALALAAFSEASWKPR  | Positive |
| P01359 | PGHPPPAGAVCLTGAQKPAA  | Positive |
| P01364 | AVSIAVALLSQAAWSEEVFD  | Positive |
| P01379 | TLVVVTIVCLDLGYTRECYL  | Positive |

|        |                        |          |
|--------|------------------------|----------|
| P01384 | TLVVVTIVCLDLGDSLICYM   | Positive |
| P01398 | TLVVVTIVCLDLGYTRTCLI   | Positive |
| P01404 | TLLVVTIVCLDLASTMICYS   | Positive |
| P01412 | TLVVVTIVCLDLGYSLICFN   | Positive |
| P01443 | TLVVVTIVCLDLGYTRKCNK   | Positive |
| P01477 | FAFLFLAFLSEPGNAYKRCH   | Positive |
| P01479 | VMISLALLLMIGVESKRDGY   | Positive |
| P01480 | VMISLALLLMTGVESVRDGY   | Positive |
| P01484 | VMISLALLFVTGVESVKDGY   | Positive |
| P01491 | LMITACLVLIGTVWAKDGYL   | Positive |
| P01492 | LIITACFALVGTVWAKEGYL   | Positive |
| P01493 | LIITACFLIGTVWAKEGYL    | Positive |
| P01494 | LMITACFLIGTVWAKEGYL    | Positive |
| P01495 | LIITACALIGTVWAKEGYL    | Positive |
| P01497 | LLLFLVVLPIMGVFGKKNKY   | Positive |
| P01499 | SVILITSYFVTPTMSIKCNC   | Positive |
| P01538 | LVLLLGALLVSQVESKSCCP   | Positive |
| P01543 | LLILGLVLEQVQVEGKSCCK   | Positive |
| P01544 | LLILGLVLEQLQVEGKSCCR   | Positive |
| P01545 | LLILGLVLEQVQVEGKSCCR   | Positive |
| P01549 | VAAGLAFSLPADRDGAPGVT   | Positive |
| P01551 | ASIGLAAAAQSVAFAAPAFS   | Positive |
| P01552 | IFALILVISTPNVLAESQPD   | Positive |
| P01553 | IFALILVLFTP NVLAESQPD  | Positive |
| P01555 | IIFVFFIFLSSFSYANDDKL   | Positive |
| P01556 | GVFFT VLLSSAYAHGTPQNI  | Positive |
| P01562 | MVLVVL SCKSSCSLGCDLPE  | Positive |
| P01563 | VALLVL SCKSSCSVGC DLPQ | Positive |
| P01567 | MVVLVLSYKSICSLGCDLPQ   | Positive |
| P01568 | MAVLVLSYKSICSLGCDLPQ   | Positive |
| P01569 | LLMALVVLNCKSICSLGCDL   | Positive |
| P01570 | MALVVL SCKSSCSLGCNLSQ  | Positive |
| P01572 | MVLAVLSYWPTCSLGCDLPQ   | Positive |
| P01579 | AFQLCIVLGS LGCYCQDPYV  | Positive |
| P01588 | LLSLLSLPLGLPVLGAP PRL  | Positive |
| P01591 | WGVLA VFIKAVHVKAQEDER  | Positive |
| P01633 | QVFV FVFLWLSGVDGDIVMT  | Positive |
| P01634 | LVFISILLCLYGADGNIVMT   | Positive |
| P01639 | QIFGF LLLL FQGTRCDIQMT | Positive |
| P01661 | LLLWV LLLWVPGSTGNIVLT  | Positive |
| P01724 | SLILSLLALSSGAISQAVVT   | Positive |
| P01729 | SLILSLLALCSGASSQAVVT   | Positive |
| P01783 | LNLVFLVLILKGVQCDVQLV   | Positive |
| P01795 | LNWVFL LTL LHGIQCEVKVV | Positive |
| P01822 | LSLLYLLTAIPGIMSDVQLQ   | Positive |
| P01830 | ISITLLLSVLQMSRGQRVIS   | Positive |

|        |                       |          |
|--------|-----------------------|----------|
| P01831 | ISVALLSVLQVSRGQKVTS   | Positive |
| P01887 | TLVFLVLVSLTGLYAIQKTP  | Positive |
| P01888 | ALVLLGLLSLSGLDAIQRPP  | Positive |
| P02223 | KFFIVLALCIVGAADPVSS   | Positive |
| P02226 | KFFAVLALCIVGAIASPLSA  | Positive |
| P02462 | PAALLLHEEHSRAAAKGGCA  | Positive |
| P02466 | RTLALLAVTSCLATCQSLQM  | Positive |
| P02647 | AVLTLAVLFLTGSQARHFWQ  | Positive |
| P02648 | ALLTLAVLFLTGSQARHFWQ  | Positive |
| P02649 | LWAALLVTFLAGCQAKVEQA  | Positive |
| P02652 | LAATVLLLTICSLEGALVRR  | Positive |
| P02654 | VVLSIVLEGPAQAQTPDVS   | Positive |
| P02655 | ALFLVLLVLGFEVQGTQQPQ  | Positive |
| P02656 | LLVVALLALLASARASEAD   | Positive |
| P02659 | AVILLSTTVPEVHKSIIID   | Positive |
| P02668 | LVVTILALTLPFLGAQEQNQ  | Positive |
| P02671 | RIVCLVLSVVGTAWTADSGE  | Positive |
| P02672 | RDLCLVLSLVGAIKTEDGSD  | Positive |
| P02675 | KHLLLLLLCVFLVKSQGVND  | Positive |
| P02679 | LYFYALLFLSSTCVAYVATR  | Positive |
| P02681 | FGIALLLTTVASVLAADTNA  | Positive |
| P02701 | LLLLLSLALVAPGLSARKCS  | Positive |
| P02702 | MTQLLLLALVAAAWGAQAPR  | Positive |
| P02703 | KVLALLLVTLTVAYAVDPDR  | Positive |
| P02739 | FTGLIFCSLVLGVSQWYSF   | Positive |
| P02740 | CICFVLLAVIVCASADNPFT  | Positive |
| P02741 | LLCFLVLTSLSHAFGQTDMS  | Positive |
| P02742 | WCFLTLVSFSNMSDQAGMHK  | Positive |
| P02743 | LLWISVLTSLLEAFAHTDLS  | Positive |
| P02745 | LVLCVLAISLASMVTEDLCR  | Positive |
| P02746 | LMLLLLGLIDISQAQLSCT   | Positive |
| P02747 | KLLLLLLLLPLRGQANTGCY  | Positive |
| P02749 | VLILFSSFLCHVAIAGRTCP  | Positive |
| P02750 | RTLFLLLLLLAASAWGVTLSP | Positive |
| P02751 | LGTAVPSTGASKSKRQAQQM  | Positive |
| P02752 | RFAITLFAVITSSTCQQYGC  | Positive |
| P02753 | VWALLLLAALGSGRAERDCR  | Positive |
| P02754 | KCLLLALALTCGAQALIVTQ  | Positive |
| P02755 | LLLALGLALACAAQAIIVTQ  | Positive |
| P02756 | LLLALGLALACGIQAIIVTQ  | Positive |
| P02758 | LLLALGLALMCGIQATNIPQ  | Positive |
| P02760 | GALLLLLSACLAVSAGPVPT  | Positive |
| P02761 | LLLCLGLTLVCGHAEAEASS  | Positive |
| P02763 | SWVLTVLSLLPLLEAQIPLC  | Positive |
| P02765 | LVLLLCLAQLWGCHSAPHGP  | Positive |
| P02766 | LLLCLAGLVFVSEAGPTGT   | Positive |

|        |                       |          |
|--------|-----------------------|----------|
| P02767 | LFLCLAGLIFASEAGPGGA   | Positive |
| P02769 | VTFISLLLLFSSAYSRGVFR  | Positive |
| P02770 | VTFLLLLFISGSAFSRGVFR  | Positive |
| P02771 | VESIFLIFLLNFTESRTLHR  | Positive |
| P02774 | KRVLVLLLAFAFGHALERGR  | Positive |
| P02775 | LQVLLLLSLLLTALASSTKG  | Positive |
| P02776 | LGLLLLPLVVAFASAEAEED  | Positive |
| P02778 | LICCLIFLTLSGIQGVPLSR  | Positive |
| P02779 | LALVTLALLCSPASAGICPR  | Positive |
| P02780 | VFLFLLVTIPICCYASGSGC  | Positive |
| P02781 | CLLTILVVCCYEANGQTLAG  | Positive |
| P02782 | CLLIMLAVCCYEANASQICE  | Positive |
| P02783 | FLCSLLLLLVGTGAIGRKTKE | Positive |
| P02784 | WAGVSVFLQLDPVNGDQDEG  | Positive |
| P02787 | VGALLVCAVLGLCLAVPDKT  | Positive |
| P02788 | FLVLLFLGALGLCLAGRERS  | Positive |
| P02789 | LCTVLSLGIAAVCFAPPKS   | Positive |
| P02790 | VALGLWSLCWSLAITPLPP   | Positive |
| P02808 | VFAFILALMVSMIGADSSEE  | Positive |
| P02810 | LLILLSVALLAFSSAQDLDE  | Positive |
| P02814 | LGLWALAACFTPGESQRGPR  | Positive |
| P02817 | GTWILFACLLGAAFSMPLPP  | Positive |
| P02866 | TFITMFLMVVNKVSSSTHET  | Positive |
| P02870 | LSILLTTIFFFKVNSTETTS  | Positive |
| P02872 | TFFLLLAASSKKVDSAETVS  | Positive |
| P02873 | LSLALFLALLSHANSATETS  | Positive |
| P02876 | GAAVFLAFAAATAQAQRCGE  | Positive |
| P02877 | IFIVLLCLTGVAIAEQCGR   | Positive |
| P02879 | FGSTSGWSFTLEDNNIFPKQ  | Positive |
| P02896 | MLTSLLYAITPADGAKEAL   | Positive |
| P02906 | GVGFTLLLASTSILAKDIQL  | Positive |
| P02910 | LSLVLAFASSATAAFAAIPQK | Positive |
| P02924 | AAIGLAAVMSQSAMAENLKL  | Positive |
| P02925 | SAVALSATVSANAMAKDTIA  | Positive |
| P02970 | ALAIASAASGMAHAWMTGD   | Positive |
| P02977 | VLGAGLVVNTNEVSAAVTRG  | Positive |
| P03950 | LVFVLGLGLTPPTLAQDNSR  | Positive |
| P03973 | VLLALGTLAPWAVEGSGKSF  | Positive |
| P03998 | LGIAILFVTVSVLAGDPNV   | Positive |
| P04002 | GQLIFLFWTMRITEASPDPA  | Positive |
| P04003 | FQMTLIAALLPAVLGNCGPP  | Positive |
| P04004 | RPLLILALLAWVALADQESC  | Positive |
| P04032 | LCAALSFGLAVSGVAADGAA  | Positive |
| P04058 | SSLGVLLHLVVLQCQADDHSE | Positive |
| P04062 | LTGLLLLQAVSWASGARPCI  | Positive |
| P04067 | AASGASATPSPAPAPAPAPV  | Positive |

|        |                       |          |
|--------|-----------------------|----------|
| P04073 | KWMVVALLCPLLEASLLRV   | Positive |
| P04090 | LGVCLLLNQFSRAVADSWME  | Positive |
| P04119 | LLTLGLALLCGVQAVEVTP   | Positive |
| P04148 | LARCLAVAAVAVLASAGPPS  | Positive |
| P04155 | CALVLVSMLALGTLAEAQTE  | Positive |
| P04171 | ATLAIAIATTLPAAADEVAV  | Positive |
| P04172 | FAAALAAFSATAALAAGALE  | Positive |
| P04180 | WVTLLLGLLLPPAAPFWLLN  | Positive |
| P04189 | TLIFTMAFSNMSAQAAGKSS  | Positive |
| P04190 | LGTIQFVSTISSVQASQKVE  | Positive |
| P04196 | LIAALLLITLQYSCAVSPTD  | Positive |
| P04217 | FLLWGVVTWGPVTEAAIFYE  | Positive |
| P04275 | GVLLALALILPGTLCAEGTR  | Positive |
| P04278 | LLLLLLLRHTRQGWALRPVL  | Positive |
| P04280 | LLILLSVALLALSSAQNLNE  | Positive |
| P04284 | LTCLMVLAIHFSCEAQNSPQ  | Positive |
| P04369 | LAALVLGAVAAPAFSAPVDQ  | Positive |
| P04377 | AAAGILAMLAAPALAENIEV  | Positive |
| P04405 | LVLSLCFLLFSGCFALREQA  | Positive |
| P04421 | LVILGFLFLSVAVQGKVFER  | Positive |
| P04552 | LVLCIFAMMATLAMSRSWHY  | Positive |
| P04557 | WAGVSMFLQLDPVNGDEQLS  | Positive |
| P04634 | LLITSVISTFGGAHGLFGKL  | Positive |
| P04635 | VASCIFVIGGGVAEANDSTT  | Positive |
| P04639 | AVLAVALVFLTGCQAWFEWQ  | Positive |
| P04651 | GLLLWLLGVAGVWASRGPL   | Positive |
| P04667 | ASLLVLLALSPGVDAAAAQH  | Positive |
| P04706 | LVALALLALAASATSTHTSG  | Positive |
| P04785 | ALLCLALAWAARVGADALEE  | Positive |
| P04816 | IAGMIALAISHTAMADDIKV  | Positive |
| P04916 | VWALVLLAALGGGSAERDCR  | Positive |
| P04925 | LLALFVTMTWTDVGLCKKRPK | Positive |
| P04937 | LLLAVLCLGTSVRCTETGK   | Positive |
| P04957 | GLFMSLFAVTATASAQTGGs  | Positive |
| P05000 | LLAALVMTSYSPVGS LGCDL | Positive |
| P05013 | ALLMALVVLSCKSSCSLDCD  | Positive |
| P05059 | AAVLALLLCAGQVIALPVNS  | Positive |
| P05060 | LLSLLGAVGLAAVN SMPVDN | Positive |
| P05090 | LLSALAGLFGAAEGQAFHL   | Positive |
| P05099 | PLSLLLLLQSCGVWGAPPQP  | Positive |
| P05113 | LHLSLLALGAAYVYAIPT EI | Positive |
| P05117 | LLIIIFASSISTCRSNVIDD  | Positive |
| P05149 | ILGVTVYSFAQLANAATLNV  | Positive |
| P05154 | LLCLVLLSPQGASLHRHHP   | Positive |
| P05155 | LTLLLLLLAGDRASSNP NAT | Positive |
| P05160 | LTFIIILIISGELYAEEKPC  | Positive |

|        |                       |          |
|--------|-----------------------|----------|
| P05164 | AGLLAILATPQPSEGAAPAV  | Positive |
| P05186 | SPFLVLAIGTCLTNSLVPEK  | Positive |
| P05231 | SLGLLLVLPAAFPAPVPPGE  | Positive |
| P05305 | YLLMIFSLLFVACQGAPETA  | Positive |
| P05307 | LLCLALTALFRAGAGAPDEE  | Positive |
| P05366 | TSLVFCSLLLVCHGGFFSF   | Positive |
| P05371 | CVALLLTWDNGMVLGEQEFS  | Positive |
| P05408 | GLLFWLASGWTPAFAYSPRT  | Positive |
| P05451 | FMLISCLMFLSQSQGQEAQT  | Positive |
| P05452 | YLLLCLFSLLTQVTTEPPTQ  | Positive |
| P05533 | LILLVALLCAERAQGLECYQ  | Positive |
| P05543 | YLVLLVLGLHATHCASPEG   | Positive |
| P05545 | ALGLLMAGICPAVLCDGILG  | Positive |
| P05546 | LNALLIFLIITSAWGGSKGP  | Positive |
| P05560 | LLSLVLCCFPDTAFGVEVDC  | Positive |
| P05623 | ALFLVLVCVLGLVQSWEWPW  | Positive |
| P05695 | AWSLGLAISAQSLAGTVTT   | Positive |
| P05790 | VILCCALQYVAYTNANINDF  | Positive |
| P06111 | ALFITASLIAGNALAAQTYI  | Positive |
| P06205 | GTAVSLCLLLFLTSALEEGE  | Positive |
| P06206 | GTAVFLYLLLFLTSALEEGE  | Positive |
| P06215 | VGVVWMLLLVGGSYGEQCGR  | Positive |
| P06276 | FWFLLLCMLIGKSHTEDDII  | Positive |
| P06278 | LFALIFLLPHSAAAAANLNG  | Positive |
| P06279 | LTALLFCPTGQPAKAAAPFN  | Positive |
| P06281 | PLWALLLLWSPCTFSLPTRT  | Positive |
| P06306 | LLALLSLWIPAPTRAFFVNQH | Positive |
| P06399 | RVACLILSLASTVWTADTGT  | Positive |
| P06597 | VLVFAALSSASSLQALPVGN  | Positive |
| P06654 | ASVSAAFLVGSTVFAVDSP   | Positive |
| P06681 | VLFCLLFLYPGLADSAPSCP  | Positive |
| P06727 | VVLTLALVAVAGARAEVSAD  | Positive |
| P06797 | LLLLLAVLCLGTALATPKFD  | Positive |
| P06857 | SIWTIALFLLGAAKAKEVCY  | Positive |
| P06858 | VWLQSLTASRGGVAAADQRR  | Positive |
| P06859 | RTLWIMAVLLVGVDGGLWQF  | Positive |
| P06865 | FSLLLAAAFAGRATALWPWP  | Positive |
| P06867 | EVVLLLLLFLKSGLGDSLDD  | Positive |
| P06868 | AVVFLLLLFLKSGLGDLDD   | Positive |
| P06875 | VTASLMYYWSLPALAEQSSS  | Positive |
| P06908 | LRCLALALTLLMVSGIENNT  | Positive |
| P06911 | MPFALLGLCVGLAAGTEGAV  | Positive |
| P06912 | VWALVLLAALGSGRGERDCR  | Positive |
| P07024 | ALLTTFTLASETALAYEQDK  | Positive |
| P07093 | LPLFLLASVTLPSICSHFNP  | Positive |
| P07098 | LTMASLISVLGTTTHGLFGKL | Positive |

|        |                       |          |
|--------|-----------------------|----------|
| P07102 | FLSLLIPLTPQSAFAQSEPE  | Positive |
| P07151 | TVIFLVLVSLAVVLAIQKTP  | Positive |
| P07154 | PLLLLAVLCLGTALATPKFD  | Positive |
| P07214 | AWIFFLLCLAGRALAAPQQT  | Positive |
| P07221 | LLLVLGSPQSGVHGEEGLD   | Positive |
| P07237 | RRALLCLAVAALVRADAPEE  | Positive |
| P07254 | LALLIGSTLCSAAQAAAPGK  | Positive |
| P07267 | LPLALLVLSANQVAAKVHKA  | Positive |
| P07288 | VPVVFLTLSVTWIGAAPLIL  | Positive |
| P07380 | LLLALGLSLMCGNQATDIPQ  | Positive |
| P07439 | VTLLVVVFAITTAECTCPGN  | Positive |
| P07456 | LVLLAFLAFASCCYAAAYRPS | Positive |
| P07457 | GLLFVLLCVDHMTASQSVVA  | Positive |
| P07474 | VILATLSVFLHILHSFPDGE  | Positive |
| P07479 | ISGALLISLAVLCQGDVVD   | Positive |
| P07497 | AALVVLLAFIAPAQAADLAH  | Positive |
| P07507 | LLLSILAALAVAALCYESHE  | Positive |
| P07528 | AISLLVGGGIGNVAAAQGGP  | Positive |
| P07529 | LLAILSALALTSVQAAPADK  | Positive |
| P07596 | SSSSPLFWPAPPSRAADPPP  | Positive |
| P07597 | ALVLMLTAAAPRAAVALNCGQ | Positive |
| P07602 | YALFLLASLLGAALAGPVLG  | Positive |
| P07625 | AVVLAMTFSAAPVFAEGDIE  | Positive |
| P07634 | LLLFLHLLLGCGRSHPLGG   | Positive |
| P07662 | ATVIGLAPAVAFALAEPTST  | Positive |
| P07692 | SSLGVLLHLVVLQCADDSE   | Positive |
| P07712 | CLAYVMAAILSLCASAPSWR  | Positive |
| P07728 | FFTVCLFLLCNGSLAQQLLG  | Positive |
| P07730 | FFTVCLFLLCDGSLAQQLLG  | Positive |
| P07759 | MGMILMAGICPAVLCFPDGT  | Positive |
| P07767 | AVASSLFTWDNKADAIVTKD  | Positive |
| P07808 | LALSLLVCLGILAEGYPSKP  | Positive |
| P07897 | LLVFVTLRVIAAVISEEVPD  | Positive |
| P07982 | PLLLAASILYGGAVAQQTVW  | Positive |
| P07987 | ATLATLAASVPLEERQACSS  | Positive |
| P07994 | LQLLLLLLAPQGGHGHCHGLE | Positive |
| P07998 | VLILLVLGWVQPSLGKESRA  | Positive |
| P08001 | LPTAVLLVLAVSVAARDNAT  | Positive |
| P08056 | KAVLALATLIGSTLASSCSS  | Positive |
| P08118 | GSVVIFATFVTLCNASCYFI  | Positive |
| P08125 | QISLLLLFCLNIVHGSDGYF  | Positive |
| P08174 | RLLLLVLLCLPAVWGDCGLP  | Positive |
| P08176 | VLAIASLLALSAVYARPSSI  | Positive |
| P08185 | CLLWLPTSGLWTVQAMDPNA  | Positive |
| P08191 | LFVLLMGWSVNAWSFACT    | Positive |
| P08236 | AWAALGPLLWGCALGLQGGM  | Positive |



|        |                      |          |
|--------|----------------------|----------|
| P08289 | LPFLVLAIGTCLTNSFVPEK | Positive |
| P08331 | SATLLATLIAASVNAATVDL | Positive |
| P08375 | FVALILAVFAGQSQAGWLKK | Positive |
| P08379 | TLVLVVAVLAALATAQLNFS | Positive |
| P08505 | HPVAFLGLMLVTTTAFPTSQ | Positive |
| P08506 | AGSAFLFLFAPTAFAAEQTV | Positive |
| P08582 | SGALWLLLALRTVLGGMEVR | Positive |
| P08603 | LAKIICLMLWAICVAEDCNE | Positive |
| P08697 | SCLQGPCSVFSPVSAMEPLG | Positive |
| P08721 | RLAVVCFCLFGLASCLPVKV | Positive |
| P08750 | TLAVTCLAPMSKAKAASDPI | Positive |
| P08751 | GLLLWMLLSVGGVWASRGPL | Positive |
| P08796 | LVLILYNILNSAHSAPTIT  | Positive |
| P08818 | AALTCLLLRPAAVAAAGGHA | Positive |
| P08833 | LVLLLLTVQVGVTAGAPWQC | Positive |
| P08878 | TLMMKIAGRSGISYYSSYGC | Positive |
| P08899 | FLLWPVLLVSFSVNAVEPIS | Positive |
| P08904 | LLLGMWWSVRPLCAVPKGL  | Positive |
| P08905 | LLTLGLLLLSVTAQAKVYER | Positive |
| P09056 | VPLLLLVLHWKHGAGSPLPI | Positive |
| P09102 | AIVALLCLVAALGLAEPLLE | Positive |
| P09121 | LWLSLTLGLLSPVHAAPDTS | Positive |
| P09228 | CTLLLLLATQAVALAWSPQE | Positive |
| P09237 | LTVLCAVCLLPGLALPLPQ  | Positive |
| P09318 | SNLMMVLCVVAMCRAVPIND | Positive |
| P09319 | NLFMTVLCVVAMCRAVPINE | Positive |
| P09333 | LSTTLVASVAASAFAAPKDG | Positive |
| P09341 | LLLLLLVAAGRRAAGASVAT | Positive |
| P09350 | FLFALFVLFLAASEAATDYP | Positive |
| P09394 | AIMMSTIVMGSSAMAADSNE | Positive |
| P09465 | VKILLALVFSLAHAQDFAE  | Positive |
| P09466 | LLTLGVALVCGVPAMDIPQ  | Positive |
| P09486 | AWIFFLLCLAGRALAAPQQE | Positive |
| P09487 | SPFLLLAIGTCFASSLVPEK | Positive |
| P09489 | VFLGCYGLSIHSSLAAYQDP | Positive |
| P09545 | IFTILSAISSPTLLANINEP | Positive |
| P09551 | LSLLVGLSTAASSYAALPET | Positive |
| P09585 | FAVTVLMCAFVSINGVGLND | Positive |
| P09586 | LLAVSNLLVWEKVTSLPNYR | Positive |
| P09616 | TLLGSLMNPVAGAADSDI   | Positive |
| P09655 | AIIFLLSALALLSLAGNPPA | Positive |
| P09656 | LSALALLNLAGNTTAKVIGK | Positive |
| P09787 | VLPGLLVAAGQAQADSQWG  | Positive |
| P09791 | LFSANLFAGVGFAAAAEGPE | Positive |
| P09923 | WVLLLLGLRLQLSLGVIPAE | Positive |
| P09954 | WGLLIFSULLGGVLAKEDFV | Positive |

|        |                       |          |
|--------|-----------------------|----------|
| P09989 | LLILTLFLTTPAVEGDVSFR  | Positive |
| P0A074 | LIAPLANPFIEISKAENKIE  | Positive |
| P0A0L2 | LFIALTLTTSPLVNGSEKSE  | Positive |
| P0A1E7 | VAAFAAIVVSGSALAGVVPQ  | Positive |
| P0A1N4 | RKWLALLLFPLTVQAAGEGA  | Positive |
| P0A1V8 | AILFSIFSLATFAHAQEGTL  | Positive |
| P0A1Z2 | LAAGLGLAMVTSQAADKIA   | Positive |
| P0A321 | GGMALMAAFSAPVLAAECSV  | Positive |
| P0A3R9 | AVLGLAVGFQTPAVAAAPTA  | Positive |
| P0A3V1 | LSLMVSSIQLKNVEAFSNQV  | Positive |
| P0A402 | LVLTLWLGFPTLASADVAGL  | Positive |
| P0A431 | AVCLGIFSLSAPAFAAKQTL  | Positive |
| P0A5Q5 | VTAVVLLCCSGVATAAPKTY  | Positive |
| P0A855 | VAFGFLILWASVLHAEVRIV  | Positive |
| P0A8X2 | LTFASLMFSAGSAVAADYKI  | Positive |
| P0A908 | ALGVLIATSAGVAHAEGKFS  | Positive |
| P0A915 | AALAVTTLLSGSAFAHEAGE  | Positive |
| P0A9Z7 | CIISLLATLPLAVHASPQPL  | Positive |
| P0AAA9 | MALSAMAMGSTSAFAHGGHG  | Positive |
| P0AAX8 | AAAFVVGFCSTASAVTYPL   | Positive |
| P0ABE7 | ILAVSSLVFSSASFAADLED  | Positive |
| P0ABK9 | FSLIPFFFTSVHAEQTAA    | Positive |
| P0ABL3 | WTAMLALVVGAVWAANGVD   | Positive |
| P0ABW7 | AMALATLFATMGASAVEKTI  | Positive |
| P0ABZ6 | TLLLGIAMIANSTFAAPQVV  | Positive |
| P0AD59 | ITTVAALVIATSAMAQDDL   | Positive |
| P0AD70 | FSAVLCAASLTSVHAAQPIT  | Positive |
| P0AD96 | LAGCIALAFSNMALAEDIKV  | Positive |
| P0ADA1 | LPFLFLVLLTFRAAAADTLL  | Positive |
| P0ADU5 | AVIAVMALCSAPVMAAEQGG  | Positive |
| P0AE22 | VCLLFALNSSAVALASSPSP  | Positive |
| P0AEB2 | LTTALCTAFISAAHADDLNI  | Positive |
| P0AEE5 | SAVMASMLFGAAHAADTRI   | Positive |
| P0AEG4 | WLALAGLVLAFSASAAQYED  | Positive |
| P0AEG6 | MLFTLLAAFSGFAQADDAAI  | Positive |
| P0AEM9 | MAVALVAGMSVKSFADDEGLL | Positive |
| P0AEQ3 | SLAALTAFAVSSHAADKKL   | Positive |
| P0AEU0 | LSLVLAFFSSATAAFAAIPQN | Positive |
| P0AEU7 | LAAGLGLALATSQAADKIA   | Positive |
| P0AEX9 | LSALTMMFSASALAKIEEG   | Positive |
| P0AFH8 | AVMLTSAVATGSAYAENNAQ  | Positive |
| P0AFI5 | LALMLAVPFAPQAVAKTAAA  | Positive |
| P0AFK9 | LAAGALALGMSAAHADDNNT  | Positive |
| P0AFL3 | AAVFALSALSPAAMAAKGDP  | Positive |
| P0AFM2 | FATAFATLISTQTFAADLPG  | Positive |
| P0AG78 | GVGLTFLLAATSVMAKDIQL  | Positive |

|        |                        |          |
|--------|------------------------|----------|
| P0AG82 | VVAATLSMSAFSVFAEASLT   | Positive |
| P0AGC3 | AAGVCLLTVSSVARADSLDE   | Positive |
| P0AGD1 | SLAILALVVATGAQAASEKV   | Positive |
| P0C0J0 | LLALGGFVLANPVFADQNFA   | Positive |
| P0C0T5 | AIALALLASSASLAATPWQ    | Positive |
| P0C0V0 | ALSLGLALSPLSATAAETSS   | Positive |
| P0C175 | LVL SAMIATFSEVEATVKCG  | Positive |
| P0C194 | LVLFTIMMLANDASLVHTNI   | Positive |
| P0C1B3 | SLFLYGLQVAAPALAATPAD   | Positive |
| P0C1C0 | AAAGLLLLAAQPTMAANTGG   | Positive |
| P0C1X2 | LTICMLAPGTGTL PKDRPS   | Positive |
| P0C1X6 | SMVLIGSIFETTVEAGEGPK   | Positive |
| P0C1Y5 | LVAVALAFLVGGAWCGPPKV   | Positive |
| P0C2E9 | AMALCLFSQPVISFSKDITD   | Positive |
| P0C2S1 | LTIVLSIMLPSTVFALEDKS   | Positive |
| P0C2T2 | PGLVGLAGGAATAGAFSRPG   | Positive |
| P0C552 | TLVVVTIVCLDLGYTLKCHT   | Positive |
| P0C553 | TLVVVTIVCLDLGYTLICYS   | Positive |
| P0C554 | TLVVVTIVCLELGYTRKCLT   | Positive |
| P0C8E7 | CIAIITALCAMQVICEDDED   | Positive |
| P0C8E8 | ARLLLCVLVVS DSKGLVSTI  | Positive |
| P0C8G6 | LLLIVVCILDHSEGARVCP    | Positive |
| P0C8G7 | VAFLLAVLALTESQAFTSVK   | Positive |
| P0C8Z8 | IALVTVFTGTGVAQAADVTA   | Positive |
| P0C908 | LIALFVCSMVIGIHGGVPIN   | Positive |
| P0CAR9 | RTLWIVAVWLMGVEGNLYQF   | Positive |
| P0CB51 | FLIGALLTLQTLVQASSMSS   | Positive |
| P0CK94 | YVLFTALLSSLCAHGAPQSI   | Positive |
| P0CS93 | CFSSINAVAVTVPHKAVGTG   | Positive |
| P0CX77 | LFVAMSSGAPLLKIREEKNS   | Positive |
| P0DJI8 | LTGLVFCSLVLGVSSRSFFS   | Positive |
| P0DJJ8 | RTLWIMAVLLLGV DGS LVQL | Positive |
| P0DJJ9 | RTLWIMAVLLVGVDGSLVQL   | Positive |
| P0DKR6 | TLLVVTIVCLDLGYSLKCYQ   | Positive |
| P0DL37 | LVVTMMMLTFD TTQAGDIKC  | Positive |
| P0DL40 | ELSHMVDLQAAAQKLKRCYQ   | Positive |
| P0DMD3 | KVLLSLCLFLMLLKATHESN   | Positive |
| P0DML2 | AFALLCLPWLQEAGAVQTPV   | Positive |
| P0DMM8 | LFISCILLIGIVVECKE GYL  | Positive |
| P0DN86 | GLLLLLLLSMGGTWASKEPL   | Positive |
| P10082 | VLLALLVCLGALV DAYPIKP  | Positive |
| P10124 | LALALILVLESSVQGYPTRR   | Positive |
| P10144 | ILLLLAFLLLPRADAGEIIG   | Positive |
| P10145 | AVALLAAFLISAALCEGAVL   | Positive |
| P10147 | AVLLCTMALCNQFSASLAAD   | Positive |
| P10152 | LLVFILGLGLTPVAPAQDDY   | Positive |

|        |                       |          |
|--------|-----------------------|----------|
| P10153 | LLLGLLAVEGSLHVKPPQF   | Positive |
| P10163 | LLILLSVALLALSSAESSSE  | Positive |
| P10184 | QVALALCCFADIAFGIEVNC  | Positive |
| P10256 | LISLFLCILLEPVEGSLMQP  | Positive |
| P10257 | QLVVMAMLWVTPVRAGTECR  | Positive |
| P10279 | ILVLFVAMWSDVGLCKKRPK  | Positive |
| P10281 | MLALGAMQLAAGAVFEFPSC  | Positive |
| P10282 | AALVSLAVASPIESRQSATT  | Positive |
| P10297 | TISIWLILAPTSTWAVNTII  | Positive |
| P10298 | SVVLVSLLVNQGRASDNQRL  | Positive |
| P10354 | SAALALLLCAGQVFALPVNS  | Positive |
| P10384 | ALAVAVALISTQAWSAGFQL  | Positive |
| P10424 | GALQVEAKEKTGQVKHKNQA  | Positive |
| P10425 | LGTTQFVSTISSVQASQKVE  | Positive |
| P10456 | TLVVVTMVCLDLGYTRRCFN  | Positive |
| P10457 | TLVVVTVVCLDLGYTRRCYN  | Positive |
| P10459 | TLVVVTIVCLDLGYTRRCFN  | Positive |
| P10475 | TLLTMGGMIA SPASAAGTKT | Positive |
| P10477 | SFSVVAASPVKGFQVSGTKL  | Positive |
| P10493 | WALLQLLLLVGPGGCLNRQE  | Positive |
| P10549 | CFGLLTFLYSGSAFAVDKSQ  | Positive |
| P10562 | LLGVVLLASVSASFHSGHS   | Positive |
| P10607 | MPVLLVSCFLSQGA AIENQR | Positive |
| P10619 | LLLLLLVSWASRGEAAPDQD  | Positive |
| P10631 | MLLVLLACL GALVDAYPAKP | Positive |
| P10645 | AAVLALLLCAGQVTALPVNS  | Positive |
| P10646 | SVCLLLNLAPAPLNADSEED  | Positive |
| P10673 | LVCMILLAFSSWSLCS DSEE | Positive |
| P10675 | MLLLLLTLAADRASAKGEKS  | Positive |
| P10720 | EMLFLALLLLPVVVA FARAE | Positive |
| P10745 | REWVLLMSVLLCGLAGPT HL | Positive |
| P10758 | FILLSCLMVLSPSQGQEAE E | Positive |
| P10762 | NTLLAVLMLAVAAQARPDAA  | Positive |
| P10764 | LALLAFLAFASCCYAA YRPS | Positive |
| P10813 | LLVVICLQSPQGFNAFPQMS  | Positive |
| P10820 | FLLGLFLLLPRPVPAPCYTA  | Positive |
| P10822 | FLLSAIISHLPSTADDDL V  | Positive |
| P10855 | AVLLCTMTLCNQVFSAPYGA  | Positive |
| P10889 | LVLLLLLATNHQATGAVVAS  | Positive |
| P10909 | FVGLLLTWESGQVLGDQTVS  | Positive |
| P10959 | CALVWASLAVCPIWGH PSSP | Positive |
| P10968 | GAAAVLAFAAAATAQAQRCGE | Positive |
| P10975 | LLLSFLFCLANTNEAAVPCS  | Positive |
| P10976 | AVLLCIVVAAPYAEAGITCG  | Positive |
| P11021 | SLVAAMLLLLSAARAEEDK   | Positive |
| P11069 | RQLLVLVGLAVVCLADEHEH  | Positive |

|        |                       |          |
|--------|-----------------------|----------|
| P11151 | CLQSLTVSRGGLVAADRITG  | Positive |
| P11218 | VVIMSSAMAVGLVSAQRCGS  | Positive |
| P11220 | LPLAGLVGLASPAQAATSAT  | Positive |
| P11226 | SLPLLLLSMVAASYSETVTC  | Positive |
| P11439 | VASLGLLAGGSFASAAEEAF  | Positive |
| P11472 | VCLGVLTACSSGPTAADLGT  | Positive |
| P11590 | KLLLCLGLTLVCIHAEETS   | Positive |
| P11598 | PGVALLLASALLASASDVLE  | Positive |
| P11643 | LLLATVMVSVFAAAAAAAAAA | Positive |
| P11657 | GTVAAVSVAGQKVFADETTT  | Positive |
| P11684 | LTLVTLALCCSSASAEICPS  | Positive |
| P11889 | GVGLGALYSGTSAQAEASTN  | Positive |
| P11916 | LVFGILLGLSHLSLSQNWAT  | Positive |
| P11919 | FAMIAFLANFGYVECNPAIA  | Positive |
| P11936 | GALLALAGLLQLALSLRIAA  | Positive |
| P12024 | TITLMIMIWMSLARASMFDR  | Positive |
| P12061 | AVAVLALIACGSAHAAGFVG  | Positive |
| P12068 | LLVLALLLSVSVQAKVYDR   | Positive |
| P12266 | VVLSALSLSAAALADTTTV   | Positive |
| P12273 | TLLVLCLQLGANKAQDNTR   | Positive |
| P12293 | VAMGLAVLTTAPATANDQLV  | Positive |
| P12334 | VAILLASLFSGSVLAAGCSV  | Positive |
| P12337 | CALALASLAECTAWGHPSAP  | Positive |
| P12346 | VGALLACAALGLCLAVPDKT  | Positive |
| P12375 | LAVSSLGMLPVGVFAAEAAM  | Positive |
| P12376 | TLFAAGMLVSALAQAHPKLV  | Positive |
| P12387 | SLLLLLLASVSLALGDPMYS  | Positive |
| P12420 | LLLVSDLLLCKSVASLPICP  | Positive |
| P12550 | KFFAVLALCVVGAIASPLSA  | Positive |
| P12637 | HLFIAGLYLLASCRAEEGLN  | Positive |
| P12670 | SFVLFFLLCVTYTYAATIEV  | Positive |
| P12706 | PLVLVLFFSTPNTEALVNQH  | Positive |
| P12707 | PLVLVLLFSTPNTEALANQH  | Positive |
| P12724 | LLLGLMGVEGSLHARPPQF   | Positive |
| P12725 | LLLAALCCLAPTSLAGVLQG  | Positive |
| P12729 | HTFIALLSLLTYANAYDYFT  | Positive |
| P12763 | FVLLFCLAQLWGCHSIPLDP  | Positive |
| P12799 | VIFYILSLLSSACLAYVATR  | Positive |
| P12820 | LPLLLLLLPPPPVILELDP   | Positive |
| P12843 | LLLGAAGGCGPGVRAEVLFR  | Positive |
| P12872 | LVVHVAAMLASQTEAFVPIF  | Positive |
| P12903 | IVVSALALSSTAALADTTTV  | Positive |
| P12943 | VAMGMGPAFAPKVAEALTAK  | Positive |
| P12992 | VLALAFLLHACTALAWQETN  | Positive |
| P12993 | ALTLTTSPLVNGSEKSEEIN  | Positive |
| P13036 | LSELLPLAGLSFSFAAAQVNI | Positive |

|        |                       |          |
|--------|-----------------------|----------|
| P13083 | LLGTCMALLLPEAWGAPLEP  | Positive |
| P13087 | SALLAAAANPLLSAADSAPN  | Positive |
| P13113 | FASLAIAAVVAPVWAATQTV  | Positive |
| P13204 | LLLLFLHLSLLGCRSHPVGG  | Positive |
| P13205 | LLLLFLNLSPLGGHSHPLGS  | Positive |
| P13384 | LLLLGAGGGDCGARAEVLFR  | Positive |
| P13385 | IMAIKVFELGLVAGLGHQE   | Positive |
| P13421 | LATVLAFGVSSLANAADQGH  | Positive |
| P13430 | LATGLINCIAFSAQAVDTTI  | Positive |
| P13432 | FGLWILLACFQSGEGVRGPR  | Positive |
| P13487 | LLALIICSIVGWSEAQFTNV  | Positive |
| P13500 | CLLLIAATFIPQGLAQPDAI  | Positive |
| P13501 | AVILIATALCAPASASPYSS  | Positive |
| P13611 | KSILWMCSTLIVTHALHKVK  | Positive |
| P13661 | IFLIANIHYSSASASTDIS   | Positive |
| P13671 | LYFILLNALINKGQACFCDH  | Positive |
| P13686 | LLILQALLLPSLADGATPAL  | Positive |
| P13689 | VAVLLAASFLPVAESSCVRD  | Positive |
| P13691 | CMLMVTPTMTGARSDNSGPWM | Positive |
| P13720 | AFLFLSLSGGNDALAGWHNV  | Positive |
| P13725 | LSLVLALLFPSMASMAAIGS  | Positive |
| P13727 | KLPLLLALLFGAVSALHLRS  | Positive |
| P13744 | FTFLCLAVFINGCLSQIEQQ  | Positive |
| P13909 | CLALGLALIFGEGSASYQPQ  | Positive |
| P13917 | ALSLSCSFLFFLSDSVTPTK  | Positive |
| P13987 | GLLVLAVFCHSGHSLQCYN   | Positive |
| P14090 | ATLALALAGSGTALAASPIG  | Positive |
| P14091 | LLLLLVLELGEAQGSLHRV   | Positive |
| P14095 | CAALPVLATSRQATGAPVAN  | Positive |
| P14133 | VLSIIFGFGITLSEAGFPKI  | Positive |
| P14170 | SFVFLLALVTYTYAATIEV   | Positive |
| P14210 | LHLLLPIAIPYAEGQRKRR   | Positive |
| P14212 | LGSLLAFAGNVQADINTE    | Positive |
| P14213 | CLMMVLAVMVEEAEAKWCFR  | Positive |
| P14214 | CLMMVLAVMVEEAEARWCFR  | Positive |
| P14384 | FPCLWLGLLLPLVAALDFNY  | Positive |
| P14423 | LAVVIMAFGSIQVQGSLLFE  | Positive |
| P14424 | RTLWIVAVCLIGVEGSLLFE  | Positive |
| P14448 | VTILCVLLCLNLAWAQDGKT  | Positive |
| P14529 | AVTMTAVPALSTPEPEAAGV  | Positive |
| P14532 | LGSLLSFATPLAQADALHD   | Positive |
| P14555 | LLAVIMIFGLLQAHGNLVNF  | Positive |
| P14612 | TLVVVTIMCLDLGYTLTCYK  | Positive |
| P14625 | LGLCCVLLTFGSVRADDEV   | Positive |
| P14630 | HQVWAALLYLYGLLFNSMNQ  | Positive |
| P14632 | IPALLFLGTLGLCLAAPKKG  | Positive |

|        |                      |          |
|--------|----------------------|----------|
| P14756 | LLFVAIMGVSPAFAADLID  | Positive |
| P14780 | QPLVLVLLVLGCCFAAPRQR | Positive |
| P14944 | IITVAYLCALPHAHARSTQG | Positive |
| P14946 | LVVALFAVFLGSAHGIKVP  | Positive |
| P15018 | VVPLLLVLHWKHGAGSPLPI | Positive |
| P15085 | RGLLVLSVLLGAVFGKEDFV | Positive |
| P15147 | LLLFLVVLPIMGVLGKKNGY | Positive |
| P15156 | AWCIVLFSVFASFSAEPTMH | Positive |
| P15169 | SVFLHLLLLFKLVAPVTFRH | Positive |
| P15196 | LPHAHHRLALRSVLATQRAQ | Positive |
| P15223 | LMITACFVLIGTVWAKDGYL | Positive |
| P15228 | LVISASMLIDGLVNADGYIR | Positive |
| P15242 | AVLFLAILCLEVDSTAPTPD | Positive |
| P15247 | TYILASVLLFSSVLGQRCST | Positive |
| P15253 | LPVPLLLGLLGLAAAEPVVY | Positive |
| P15270 | VGALCMGGKVYGEVNGDWNN | Positive |
| P15279 | MLALAPAALSSVAYANDKL  | Positive |
| P15289 | PRSLLLALAAGLAVARPPNI | Positive |
| P15320 | AALAILAASAGYAAEIVA   | Positive |
| P15321 | KITALTLLVSTALSAETLPD | Positive |
| P15358 | KLAILLLFTVAIVRCQGPF  | Positive |
| P15399 | VILLLLTLDVLGVSSMMTDK | Positive |
| P15450 | IFIFALLATICAAYVPLP   | Positive |
| P15452 | FLLVAVVGLAGITFANEQLA | Positive |
| P15453 | FIATMVLMAFPFAESTTV   | Positive |
| P15468 | LLTLLGLGLVQPSYGQDRMY | Positive |
| P15473 | LTALTLLRGPPVARAGAGAV | Positive |
| P15478 | ILIFMILATTSSTFATLGEM | Positive |
| P15488 | LIGLSLSAMSSYSLAAAGPT | Positive |
| P15497 | VVLTLAVLFLTGSQARHFWQ | Positive |
| P15515 | VFALVLALMISMISADSHEK | Positive |
| P15516 | VFALILALMLSMTGADSHAK | Positive |
| P15522 | FAVLLASLAATSLASLNEP  | Positive |
| P15570 | LLAAVAAALVGSANATACTA | Positive |
| P15644 | TLLIFAALLFRPAAAEFSA  | Positive |
| P15691 | LALLLYLHHAKWSQAAPMAE | Positive |
| P15693 | VLLLLLGLRIHLSFGVIPVE | Positive |
| P15703 | TAATALFFTASQVSAIGELA | Positive |
| P15737 | LFIGAFAAVPTSVQSIGVCY | Positive |
| P15879 | IQSPQKCYAYSINQKAYSNT | Positive |
| P15917 | AITLSGPVFIPLVQGAGGHG | Positive |
| P15922 | ASIVATCLMSTPALAATAQA | Positive |
| P15926 | MSTSILLNAQSDIKANTVTE | Positive |
| P16027 | MLALAPAALSSGAYANDKL  | Positive |
| P16030 | IFITLLLTQLNKVKSTSSTL | Positive |
| P16035 | LGLLLLATLLRPADACSCSP | Positive |

|        |                       |          |
|--------|-----------------------|----------|
| P16094 | FLILAIFLGGSIVKGDVSFR  | Positive |
| P16112 | TTLLWVFVTLRVITAAVTVE  | Positive |
| P16159 | LLAAVLVSIFAAVAAGNED   | Positive |
| P16216 | VQRQTRNSSTAVENSAADES  | Positive |
| P16225 | LVLVAVFLICETLVAQRLDR  | Positive |
| P16303 | YPLVWLFLAACTAWGYPPSSP | Positive |
| P16368 | FCLLLGTLLPRADACSCSP   | Positive |
| P16404 | LSLTLFLLILNKVNSVETIS  | Positive |
| P16444 | WSGWWLWPLVAVCTADFFRD  | Positive |
| P16454 | SLIACLSIASVNVYAASESS  | Positive |
| P16466 | AASLAIIFVSLNAYGNGIVP  | Positive |
| P16611 | LIALALLRGPPAARAGSGAA  | Positive |
| P16612 | LALLYLHHAKWSQAAPTTE   | Positive |
| P16619 | AVLLCTMALCNQVLSAPLAA  | Positive |
| P16636 | VLFLGQLQFCPLLRCAPQAP  | Positive |
| P16699 | AFIMFFSVLPTISMSSEANG  | Positive |
| P16700 | LALVASLLLAGHVQATELLN  | Positive |
| P16850 | LLATVLVSVFAAATATGPYC  | Positive |
| P16851 | LLAAVLVSVFAAAAATGPYC  | Positive |
| P16860 | LLLLFLHLAFLGGRSHPLGS  | Positive |
| P16869 | AGCIALALLPSAAFAAPATE  | Positive |
| P16933 | LYAFVAFGALVAALPGGHPG  | Positive |
| P16947 | AVLGAGFANQTEVKAAEKKV  | Positive |
| P16950 | FTAVFGSMPMEFAKAETDTA  | Positive |
| P16975 | AWIFFLLCLAGRALAAPQTE  | Positive |
| P17050 | LKTVLLLGHVAQVLMLDNGL  | Positive |
| P17164 | GLLLLAASAQAGGLAPHHY   | Positive |
| P17213 | SLMVLVAIGTAVTAAVNPGV  | Positive |
| P17259 | ALLAAALTAATPALADITVY  | Positive |
| P17314 | LLAAVLLSVLAAASASGSCV  | Positive |
| P17315 | GLCLSAISCAWPVLAVDDDGG | Positive |
| P17454 | TLLSLLLAAPGALGTNPGL   | Positive |
| P17475 | LLAALCCLAPSFLAEDAQE   | Positive |
| P17572 | LLVSNMLLTKEGVTSPLICS  | Positive |
| P17690 | ALVLLLGFLCHVAIAGRTPC  | Positive |
| P17692 | LGLSLAFGLFSPAQAAPDTS  | Positive |
| P17697 | LLLMGLLLSWESGWAISDKE  | Positive |
| P17715 | VLALLALWGPNSVQAYSSQH  | Positive |
| P17728 | VMISLALLLLGVESVRDAY   | Positive |
| P17901 | LMIFTALLPMQNANAYDASL  | Positive |
| P17935 | RILWIVAVCLIGVEGSVIEF  | Positive |
| P17936 | LTLLVLLRGPPVARAGASSA  | Positive |
| P17953 | GVLGVVGLATDDVQAAELDT  | Positive |
| P17989 | AVAAAAAALTNNVSAKDFSG  | Positive |
| P18126 | CGLLGAALSAGSIQAAVCEY  | Positive |
| P18137 | VSLLVVGILFPAIQAKQFTK  | Positive |



|        |                      |          |
|--------|----------------------|----------|
| P18181 | WCLVLELLLLPLGTGFQGH  | Positive |
| P18278 | ICAAALPYAAVPARADGQGN | Positive |
| P18328 | TLVVVTIVCLDLGYTLTCVT | Positive |
| P18329 | TLLVVTIVCLDLAHTRICYS | Positive |
| P18336 | VIVTTAVMLVPRAWAQTAW  | Positive |
| P18417 | FFLLLLSSSSSSSSSPILK  | Positive |
| P18418 | LSVPLLGLLGLAAADPAIY  | Positive |
| P18428 | ILLALLTSTPEALGANPGL  | Positive |
| P18477 | MTLAAGALVAPTGAAPADP  | Positive |
| P18510 | LITLLLFLFHSETICRPSGR | Positive |
| P18632 | VALLVFSFVIGSCFSDNPID | Positive |
| P18657 | VVLSMVLEGPAPAQGAPDVS | Positive |
| P18658 | ALCLVLLVLGFEVQGAQLPQ | Positive |
| P18659 | LLVAALLSLLASARASEAD  | Positive |
| P18684 | FYLLVICALSLAVMADEKPK | Positive |
| P18761 | ALVSVVSLFFLGIQAHSDWS | Positive |
| P18829 | VALLVVVVAALCSAQLNFT  | Positive |
| P18895 | LSLAIALLLGAPAFANSGE  | Positive |
| P18956 | AIAALLSGSCFSAAAAPPAP | Positive |
| P18958 | IATLLSALSGGCMASRL    | Positive |
| P18959 | VVAIVVYLAVGNVDSSPDVM | Positive |
| P18998 | MKIAGRSGISYSSYGCYCG  | Positive |
| P19007 | LGAVITLLLWGQLFAADFGN | Positive |
| P19034 | VGFLILLVLGFEVQGAHVPQ | Positive |
| P19035 | AAFLALLVLPEATKAEEGSL | Positive |
| P19111 | CVLLLLGLHLQLSLGLVPVE | Positive |
| P19121 | VTLISFIFLSSATSRNLQR  | Positive |
| P19134 | AGALLACAALGLCLAVTEKT | Positive |
| P19136 | VALAAITRAAPTAESAVCPD | Positive |
| P19137 | LLVLLASVLWTVRSQQRGL  | Positive |
| P19204 | CWILAGFCLLFCCKAEEGLN | Positive |
| P19250 | SFLFISMLAAFKTFAPLPS  | Positive |
| P19313 | TTFILVLNMRLCPVLGHFLG | Positive |
| P19329 | LTLALFLVLLTHANSSNDAS | Positive |
| P19369 | IALVGSVAAMGAHAEGGIA  | Positive |
| P19400 | ILSLASLWTSSIAYSQFLFS | Positive |
| P19401 | TVVGAGLVAGQTVRADHSDL | Positive |
| P19405 | AFSSLASGSVPEASAQEKKK | Positive |
| P19406 | IFAGAELQQTEKASAKKQDK | Positive |
| P19425 | IAALVLFTAVIGALADYPAP | Positive |
| P19427 | TLLWVLLPLVTVAWGQYGDY | Positive |
| P19487 | ALATALALAAGPAFSYSINN | Positive |
| P19531 | LFSGSLPYNPNAAEASSSAS | Positive |
| P19567 | GIAIAAMLVAAPAAAADFEV | Positive |
| P19571 | LVITSIPFTLVDVEAHNGT  | Positive |
| P19584 | TASLIFASSIVTANASIAPN | Positive |

|        |                       |          |
|--------|-----------------------|----------|
| P19594 | LLISLLFCIAHTCSASKWQH  | Positive |
| P19656 | AVVALVLLAAATSEAAISCG  | Positive |
| P19667 | TILVTFAAVASLGMADNVLL  | Positive |
| P19707 | FTGLVFCSLVLGVSQWYSF   | Positive |
| P19708 | FPGLLFCSLVLGVSGQWYSF  | Positive |
| P19801 | GWAVAAILMLQTAMAEPSPG  | Positive |
| P19835 | LVVLGLTCCWAVASAAKLGA  | Positive |
| P19855 | LIVSASMLIESLVNADGYIR  | Positive |
| P19872 | VLAVVALVAVATSRAQLNFT  | Positive |
| P19874 | ALLATFLLSLTLCEAAVLTR  | Positive |
| P19876 | LLLLLLVAASRRAGASVVT   | Positive |
| P19883 | LLLLCQFMEDRSAQAGNCWL  | Positive |
| P19926 | AAVAGIVLLASNAQAQTVPE  | Positive |
| P19957 | IVVVFLIAGTLVLEAAVTGV  | Positive |
| P19959 | TLVVVTIVCLDLGYTLTCN   | Positive |
| P19999 | LLPLLVLVCVSVSSSGSQT   | Positive |
| P20013 | VIGALQGANAALTRRVACPD  | Positive |
| P20029 | TVVAAALLLLGAVRAEEDK   | Positive |
| P20041 | LLALAAAALSAGAHATGTSV  | Positive |
| P20058 | LGVWGLCWSLATVNSVPLTS  | Positive |
| P20059 | NILVLLGLCWSLAVANPLPA  | Positive |
| P20062 | LGAFLFLGVLGALTEMCEI   | Positive |
| P20068 | LVCLTLLAFSSWSLCSDDSEE | Positive |
| P20112 | AWIFFLLCLAGKALAAPQQE  | Positive |
| P20142 | KWMVVVLVCLQLLEAAVVKV  | Positive |
| P20155 | ALLLAVTFAASLIPQFGLF   | Positive |
| P20160 | TVLALLAGLLASSRAGSSPL  | Positive |
| P20362 | GVWAALLWPYLLTASIPLDC  | Positive |
| P20462 | LFLTISLSLFSIIHADDFAF  | Positive |
| P20474 | RTLWIMAVLLVGVEGSLIEF  | Positive |
| P20476 | RTLWIMAVLLVGVEGHLMQF  | Positive |
| P20507 | ALLLVALALAGCAQACIYKF  | Positive |
| P20626 | SIIMAIMLPVGNAAAAPVVH  | Positive |
| P20656 | AWILLQFSAWTTTDAVTSIT  | Positive |
| P20713 | MAAAVSMILAGGAHAAQQR   | Positive |
| P20740 | LKFILAILLLHAAAGKEPEP  | Positive |
| P20774 | STLLLLLLVPLIKPAPTQQ   | Positive |
| P20797 | LLLLPVFVAINLVHSSPEIM  | Positive |
| P20827 | LWAPLLGLCCSLAAADRHTV  | Positive |
| P20933 | VLLVPFLLCQALVRCSSPLP  | Positive |
| P20959 | LTALTLLRGPPAARAGAGTM  | Positive |
| P21128 | CISLVLAVLCGLAWAGKIES  | Positive |
| P21163 | ATPVTEDRLALNAVNPADN   | Positive |
| P21171 | GIAVTAFAPTASASTVVV    | Positive |
| P21175 | FAAMAIAGFASYSMAADTIK  | Positive |
| P21226 | IPILLVLFIVSCCSAEQCGT  | Positive |

|        |                       |          |
|--------|-----------------------|----------|
| P21326 | TWITWYAIVNPQSRAAPTLE  | Positive |
| P21338 | ALLAVSLLPFSSANALALQA  | Positive |
| P21589 | LLLALGAVLWPAAGAWELTI  | Positive |
| P21611 | VVLVTLVALLGLAQADLTPK  | Positive |
| P21614 | KRVLVLLLALAFGHALERGR  | Positive |
| P21697 | LVVSSFLLSVSPAAAANATV  | Positive |
| P21741 | FLLLTLLALLALTSAAVAKKK | Positive |
| P21743 | PFLILLSFQVRVVAGAPQPW  | Positive |
| P21744 | VAALLLAAGPRPSLGDEAIH  | Positive |
| P21760 | LSLALALLCLLHTEAAATVP  | Positive |
| P21781 | SCFHIICLVGTISLACNDMT  | Positive |
| P21782 | LAFIFILAAVDTAEEAGKKEK | Positive |
| P21814 | SLVFILCGLFNSIFCEKQQH  | Positive |
| P21828 | KPIFLVLLVATSAYAAPSVT  | Positive |
| P21837 | IILLIILLSFDIISAAKKFG  | Positive |
| P21919 | VCWAAVLWPCPPTHSSPVDC  | Positive |
| P21956 | AALCGMLLCASGLFAASGDF  | Positive |
| P21978 | VALLLCTSSAPVARAAGTSD  | Positive |
| P21982 | ILGAALFVGNSGAFAEQATL  | Positive |
| P22063 | LATVALVSSPGWSFAAQGTPA | Positive |
| P22088 | MTLATTHAAMAATAPAAGYA  | Positive |
| P22146 | KLATAAAFFAGVATADDVPA  | Positive |
| P22266 | GSCLALAGPAGSAGAAPADP  | Positive |
| P22297 | KLLTLIALTCAAANAACKSSY | Positive |
| P22301 | SALLCCLVLLTGVRASPGQG  | Positive |
| P22323 | LLLAGLCYLVFGIMAEDIQV  | Positive |
| P22325 | LLLAGLCCLVFGIMAEDAQV  | Positive |
| P22327 | LVLCALALLVAGGLADPVRN  | Positive |
| P22340 | AMLIALLTSAASAHAQTDIS  | Positive |
| P22362 | VCLLLAGMWPEDVDSKSMQV  | Positive |
| P22364 | AACVLAAFGATGALADKATI  | Positive |
| P22365 | AAIALFAIGATGAWAQDKIT  | Positive |
| P22388 | LFVAFQGAPETA VLGAELSP | Positive |
| P22390 | AAVLAAFTASSPLLARTQGE  | Positive |
| P22394 | SLFLAAAVNLAGVLAQAPRP  | Positive |
| P22412 | WTSWWLWPLVAVCAADQFRD  | Positive |
| P22458 | RPIFTLALLWVVLADQESC   | Positive |
| P22541 | VIVGGVFGISFVKGRVTFPW  | Positive |
| P22629 | AVSLTTVSITASASADPSKD  | Positive |
| P22641 | LLPVDRRGRVSRANAAGPAE  | Positive |
| P22692 | VAALLLAAGPGPSLGDEAIH  | Positive |
| P22748 | LLALLALSAARPSASAESHW  | Positive |
| P22751 | ALNSLLLLGSNQRFATQDVA  | Positive |
| P22864 | AALTAIAALAAARAAVGVSG  | Positive |
| P22865 | TVILSAAAPLSGVYADTNSD  | Positive |
| P22894 | TLPFLLLLHVQISKAFPVSS  | Positive |

|        |                       |          |
|--------|-----------------------|----------|
| P22922 | KTIICLFTIAIAAMAAVTNL  | Positive |
| P22952 | LAMLLLTSPGPLASASPIEA  | Positive |
| P22969 | GAWLLLSQLPRELSGQKPDD  | Positive |
| P23028 | HLLVLLGVCVSLPGAASIPR  | Positive |
| P23030 | CVGTALTALAFNASAAC TYT | Positive |
| P23031 | STGAALAILSQAASAAC TYT | Positive |
| P23035 | LLAGLGCLLPGLADEAQE    | Positive |
| P23044 | LVFSALASLLSGASATIYYA  | Positive |
| P23061 | LISLIASLYQVEVDAHGYMT  | Positive |
| P23141 | LRAFILATLSASA AWGHPSS | Positive |
| P23142 | LLGGLALLAAGVDADV LLE  | Positive |
| P23284 | AGSVFFLLLPGPSAADEKKK  | Positive |
| P23360 | LLAPFAAASPILEERQAAQS  | Positive |
| P23389 | LLGLLGATVVAAVSSMPVDI  | Positive |
| P23472 | LLAISLIMSSSHVDGGGIAI  | Positive |
| P23515 | LCLFILLFLTPGILCICPLQ  | Positive |
| P23564 | LVSLQVFAFASISSAAPTEP  | Positive |
| P23631 | EIMERANHSLVRMRREGEDL  | Positive |
| P23659 | ISLLVTGLFIHTPKAEAAGY  | Positive |
| P23805 | LSVLLLLTQPWRSLGAEMTT  | Positive |
| P23806 | FGLLVVAASLRGTGADCLSG  | Positive |
| P23807 | FGFLVVFLSLSGTAADCPSD  | Positive |
| P23827 | PAVLFAAFATTSAWAAESVQ  | Positive |
| P23843 | AGVLAALMAGNVALAADVPA  | Positive |
| P23847 | GLSLVAMTVAA SVQAKTLVY | Positive |
| P23857 | GLLALALVFSLPVFAAEHWI  | Positive |
| P23903 | MLASVGVLPSTSKVQAAGTTV | Positive |
| P23954 | AAAVPLLLASGALWASTDAI  | Positive |
| P24021 | PISAATLALAQLTYGWGNLG  | Positive |
| P24027 | RALWIVAVLLVGVEGSLLQF  | Positive |
| P24037 | AVGAVIAFGTHGAMAAAPAD  | Positive |
| P24052 | LLLLALLLAAA EAAKAKK   | Positive |
| P24059 | CLVLAVASSSSSALAADAGH  | Positive |
| P24090 | LVLLLCFAQLWSCQSAPQGA  | Positive |
| P24091 | LSSLLFSLLLLSASAEQCGS  | Positive |
| P24093 | MAAASMVFVAVSSAHAGFTPS | Positive |
| P24121 | SINDKIEVSNTSLAADVKN   | Positive |
| P24228 | FIIGLTSCIAFSVQAANVDE  | Positive |
| P24258 | ALLAALALAGCAQACIYKF   | Positive |
| P24259 | FLLVLVFQFPQGQTRANPVYG | Positive |
| P24296 | LVLMLAAVPRAA VAIDCGHV | Positive |
| P24336 | LVISASMLLECLVNADGYIR  | Positive |
| P24474 | LLASLTLLGLATAHAKDDMK  | Positive |
| P24476 | IAWILFQSSSWTTDAATAYT  | Positive |
| P24478 | FSLILTLFLTAPAVEGDVS   | Positive |
| P24605 | RTLWIMAVLLVGVEGSLFEL  | Positive |

|        |                      |          |
|--------|----------------------|----------|
| P24627 | VPALLSLGALGLCLAAPRKN | Positive |
| P24735 | IAASTLLFATTPAAGEAPA  | Positive |
| P24792 | FFFGLILAFGISSEGSQIRH | Positive |
| P24802 | VLLPWVVLPLLGVQGGSGSK | Positive |
| P24807 | GLLLLALLLPTQIYCNQTSV | Positive |
| P24817 | FLIIAFIGVPTAKGDVNFD  | Positive |
| P24821 | LAGVFLAFLALATEGGVLKK | Positive |
| P24854 | AALLLSASGPRPSLGDEAIH | Positive |
| P24855 | GALLALAALLQGAVSLKIAA | Positive |
| P25031 | WMLLSCLMLLSQVQGEDSPK | Positive |
| P25033 | SIAVLSACIIVGSALPVDKY | Positive |
| P25068 | FLVLSAWSGFTQGVGNPVSC | Positive |
| P25275 | MTLATTHAAMAATAPADGYA | Positive |
| P25289 | LLTLLLDVVVKPAEGQSSCS | Positive |
| P25291 | LWLALASCILTLASPEQQGN | Positive |
| P25311 | PVLLSLLLLLGPVPQENQD  | Positive |
| P25331 | ALAVAFMVNLDYANCSAIA  | Positive |
| P25403 | IVLILFIAMSAMIEAQSIGN | Positive |
| P25404 | IVLILFIAMSGMIEACIGNG | Positive |
| P25718 | LAACFLTLLPGFAVAASWTS | Positive |
| P25796 | LLLLLVLLELGQAPGALHRV | Positive |
| P25871 | FLVFFLLAFVTYTYASGVFE | Positive |
| P26202 | KVLVVLVGLAVVACAIPRRR | Positive |
| P26203 | KVLVVLVGLAVVACAIPHRR | Positive |
| P26216 | MRALFLLVLCIVHGEKEES  | Positive |
| P26221 | AGMLGVPLATGTAHAEPAFN | Positive |
| P26461 | FILVLVLPLCSETGFARSKK | Positive |
| P26501 | GCAVLAGVPAMPAHAAINSM | Positive |
| P26514 | LGTATALIAPPGAHAESTL  | Positive |
| P26515 | LAALAALMLPGTAQADTVVT | Positive |
| P26652 | VFLCSWSLRDLVAEACTCVP | Positive |
| P26729 | LAIALMLSTVMWVSTQQPQA | Positive |
| P26730 | LAIALMLTIVMWVSTQQPQA | Positive |
| P26732 | LAIALMLTTVMWASTQQPQA | Positive |
| P26776 | PSLALLLSTATLVSGAWNRR | Positive |
| P26780 | ILVLVIFEVPEIKAQDSECL | Positive |
| P26827 | LSLTLVFGLTAPIQAASDTA | Positive |
| P26877 | AIGLASLAASPLIQASTYTQ | Positive |
| P26894 | AVFLLSAALCEAAVLARVSA | Positive |
| P27032 | WALMLMVWFSASATAANGWE | Positive |
| P27033 | GVSIALAAFSNVAAAGCEYV | Positive |
| P27035 | SIVGLTALAGPPAQAATGCK | Positive |
| P27050 | AFILIITWFAPRADAAAQWQ | Positive |
| P27177 | LLALLLAACDVALSKKGKG  | Positive |
| P27274 | ILLLLLAVLCSTGVSLRCYN | Positive |
| P27275 | VIVMMAFMMVDPSMGVGECV | Positive |

|        |                      |          |
|--------|----------------------|----------|
| P27373 | MLLLIVISMSGIAGAAEVKN | Positive |
| P27477 | AVLLAVPGWLTPATAASQAT | Positive |
| P27485 | VWALVLLAALGSAQAERDCR | Positive |
| P27654 | KIAFVLSAIASLAVADTSAA | Positive |
| P27657 | LMLWTFAVLLGAVAGKEVCF | Positive |
| P27731 | TLLVFLAGLVFLSEAAPLVS | Positive |
| P27773 | PGVALLASARLAAASDVLE  | Positive |
| P27797 | LSVPLLLGLLGLAVAEPVY  | Positive |
| P27919 | VSATFAQYAESDGSYEEVEG | Positive |
| P27951 | SVAVASLFMGSVAHASELVK | Positive |
| P28041 | LLAAVLASVFAAATATGQYC | Positive |
| P28053 | LPLLLLLLWGTGSHGFPAAT | Positive |
| P28307 | VAAIAAIVFSGSALAGVVPQ | Positive |
| P28316 | LLLLSIVFFVVTVSANKTRE | Positive |
| P28319 | ALSVALFALAKMVIADSEEF | Positive |
| P28325 | HTPLLLLTALMVAVAGSASA | Positive |
| P28351 | LLAATLAATPWQVYGSIEQP | Positive |
| P28491 | LPVPLLLGLVGLAAAEPTIY | Positive |
| P28581 | IAGCLFSLSLSALAAIPAG  | Positive |
| P28585 | TATVTLLLSGVPLYAQTADV | Positive |
| P28623 | VMATSSIIAGGNAYGSTAFT | Positive |
| P28665 | SVLLAFLHSASLLNGDSKYM | Positive |
| P28770 | AALSIWLCLGATTLAESHGP | Positive |
| P28798 | VLMSWLAFAAGLVAGTQCPD | Positive |
| P28800 | LALILSCLSSLCSAQFSPVS | Positive |
| P29026 | GMAISAFLASTGVQAAWSSN | Positive |
| P29027 | GMAISAFLASTGVQAAWSSH | Positive |
| P29029 | IILLFTQFLLLPTDAFDRSA | Positive |
| P29060 | LTALVLFLRALKLEAGDIVI | Positive |
| P29064 | SSTLALPSSVWEHQLETNVL | Positive |
| P29241 | VCLAVTLTSISPSEAIVPTR | Positive |
| P29288 | LGLQILLPLLAHCTAPAST  | Positive |
| P29392 | VIPWALLSTATVDSMDWLP  | Positive |
| P29399 | TRELTENELEMTAGGTASQQ | Positive |
| P29421 | LILLSLLAISFSCSAAPPPV | Positive |
| P29457 | SLLGLTLCLLAVALAAEVKK | Positive |
| P29459 | LLVATLVLLDHLSLARNLPV | Positive |
| P29460 | ISWFSLVFLASPLVAIWELK | Positive |
| P29523 | HPERLAAGEASAATRSAAES | Positive |
| P29739 | LVALAILTAAGSANAGINLY | Positive |
| P29788 | RPFFILALVAWVSLADQESC | Positive |
| P29794 | FVAGLFVMLVQGSWQRSIQD | Positive |
| P29822 | ALTAAALLCSTAAFAGEVTI | Positive |
| P29957 | AGLSLGLLLPSIATATPTTF | Positive |
| P30040 | LLGFLLLSAPHGGSLHTKG  | Positive |
| P30101 | PGVALLLAAARLAAASDVLE | Positive |

|        |                       |          |
|--------|-----------------------|----------|
| P30120 | SGILLLSLIASSKACSCAP   | Positive |
| P30122 | SRLGPSPGCLAVASAAKLGS  | Positive |
| P30130 | VVACAFAAQAPLSSADLYFN  | Positive |
| P30224 | LVFFAALEAPMVVEAQKLCE  | Positive |
| P30230 | LVVFAAFEEPTMVEAQKLCQ  | Positive |
| P30348 | LLLATNHQGTGVVVASELRC  | Positive |
| P30438 | VLLWAALLISGGNCEICPA   | Positive |
| P30440 | GALLVLALLVTQALGVKMAE  | Positive |
| P30659 | LVVVLAVFVAFNVAEGCDATC | Positive |
| P30859 | LIAALIAGFSLSATAAETIR  | Positive |
| P30860 | VLAALLASFTFGASAAEKIN  | Positive |
| P30919 | FLLLPLVLGIPLVRGSNPLP  | Positive |
| P30921 | LSLSLALSLLGPAHAAPDTS  | Positive |
| P30922 | HTGFVVLVLLQSCAAYKLIC  | Positive |
| P31025 | LLAVSLGLIAALQAHLLA    | Positive |
| P31083 | LAACLWLGFA PQASADVAGL | Positive |
| P31096 | RIAVICFCLLGIASALPVKP  | Positive |
| P31110 | VVVLVATLAAGGANAATFTI  | Positive |
| P31133 | LVAGALMAVSVGTLA AEQKT | Positive |
| P31211 | CLLWLCTSGLWTAQASTNES  | Positive |
| P31226 | FQTALFFTIISLSFAAPNAK  | Positive |
| P31231 | LAALCLSLANLGRGEDGLD   | Positive |
| P31235 | HLFVVG VYLLSSCRAEEGLN | Positive |
| P31358 | TISLLVMVQIQ TGLSGQNDT | Positive |
| P31418 | LVLVVLVGLVGAVSADVQVM  | Positive |
| P31419 | ILMVVVVFITDSVMGTAEVM  | Positive |
| P31420 | LILTICALHVNQMMALKDCV  | Positive |
| P31429 | WTSWWLWPLVAVCTADSFLD  | Positive |
| P31515 | TVSLCHFMEYRAVQAGNCWL  | Positive |
| P31532 | ATVIVLCSLFLGVSGDGWYS  | Positive |
| P31608 | ISGVLLISLAVLCHGDPVVD  | Positive |
| P31697 | ILMFMAMMVAGRAEAGVALG  | Positive |
| P31715 | VATSMALLLSGTANAEGKI   | Positive |
| P31716 | LLAPLANPLLENAKAANDTE  | Positive |
| P31720 | LVACVLAVTLVWTVAEDVCR  | Positive |
| P31722 | YLLLLLLALPLRSQANAGCY  | Positive |
| P31723 | HPYGETEAVLRSEPKSNQAK  | Positive |
| P31746 | FIFLLLSLPTVAEADV TNK  | Positive |
| P31779 | LTIFIFSGAFHRAQGTHGEA  | Positive |
| P31797 | AIFIVSDTQKVTVEAAGNLN  | Positive |
| P31835 | MSVGIALGAALPVWASP DTS | Positive |
| P31854 | RTLWIVAVWLMGVEGNLFQF  | Positive |
| P31956 | LFVFIFPQNLVFAGEDKNEG  | Positive |
| P32478 | KKTLVASALAATTLAAYAPS  | Positive |
| P32520 | FVVLTSIFIAASAYGLTNST  | Positive |
| P32722 | IALAVSAGSTQFAVADAFVS  | Positive |

|        |                        |          |
|--------|------------------------|----------|
| P32823 | TSYIGFALLSGGALAAPSTP   | Positive |
| P32881 | VALVVLSYKSFSSLGCDLPQ   | Positive |
| P32890 | YVLFTALLSSLYAHGAPQTI   | Positive |
| P32936 | LLAAVLVSIFAAVAAGVSED   | Positive |
| P33093 | AFALLCLPWLQEGSAFPTIP   | Positive |
| P33129 | IATFCALLYCNTAFSAELVE   | Positive |
| P33136 | SAAVMLTLYTSSSWAFSIDD   | Positive |
| P33183 | FYIVVLAICSVGIQIDYPS    | Positive |
| P33185 | LLILTIFLKSPTEGDVSR     | Positive |
| P33219 | FLGLLLVSACASVFAANNET   | Positive |
| P33406 | VLMLASGGMVNMVHAETVI    | Positive |
| P33436 | RVLCVLCCLLGHAIAAPSPI   | Positive |
| P33487 | SVALLLFYFSETSLGAPCPI   | Positive |
| P33557 | TAF AAPVPEPVLVSR SAGIN | Positive |
| P33559 | MLFASHVLSEPIEPRQASVS   | Positive |
| P33575 | IQALLVLALLHLATATPVIG   | Positive |
| P33577 | MQALLVIALLLHLATATPVVT  | Positive |
| P33579 | MLVVSNNLLWEKAASIPACM   | Positive |
| P33665 | AGVGYASTQASTAVKAGAGL   | Positive |
| P33679 | AIVGIFVALLAVAGEAAVFT   | Positive |
| P33682 | CALPLAFAAAPPAHAADPTT   | Positive |
| P33781 | TSVLAMATVSGSVLAAVTNG   | Positive |
| P33937 | GLSVPGVARAVVGQQEAIKW   | Positive |
| P34095 | VLIFAVAFVATATHQGEILC   | Positive |
| P34096 | LLTLLGLGLVQPSYGQDGMV   | Positive |
| P34115 | ILSIFLICFLQLGQSVIDPS   | Positive |
| P34116 | TL SIFLICFLQLGQSVIDPS  | Positive |
| P34170 | ILVFVASVADSVIGTAEVMS   | Positive |
| P34171 | LVVVLTVNLLQGALTDVYVM   | Positive |
| P34174 | ALALMVNMAVGSVDASQEV M  | Positive |
| P34207 | LLLLVSNLLWENMASKPTV    | Positive |
| P34210 | MLAAPVVVFSSQEASASDFFG  | Positive |
| P34745 | LSVVVASLLFSQGATFESQR   | Positive |
| P34746 | SVVLQLSVVCLGVSSQQITD   | Positive |
| P34752 | PLYLLSGVTSGLAVPASRNQ   | Positive |
| P34754 | SLLTLACALATGASAFSYGA   | Positive |
| P34951 | SAVAIFSVLAGVATATSIYT   | Positive |
| P35052 | WLLCAAAALVACARGDPASK   | Positive |
| P35053 | WLLCAAAALVACTRGDPASK   | Positive |
| P35150 | ISFLIATVNVNTAHAAIDVS   | Positive |
| P35248 | LSMLVLLVQPLGDLGAEMKT   | Positive |
| P35355 | FRAVLLCAALALSHAANPCC   | Positive |
| P35441 | LRGLGVLFLLHMC GSNRIPE  | Positive |
| P35481 | KVIVLFLAVTLVVESTGIPG   | Positive |
| P35482 | ASLSVAALVSAQAMAVTGGG   | Positive |
| P35483 | AVSMAVLGSALPAQARQDDP   | Positive |



|        |                       |          |
|--------|-----------------------|----------|
| P35495 | ALLFSTATLISTGWGLDYHA  | Positive |
| P35496 | IPWALLLSTATLVSTARING  | Positive |
| P35501 | LNLFLFIGCFLTCSASNTPK  | Positive |
| P35541 | FTGLILCSLVLGVHSQWMSF  | Positive |
| P35555 | ALGFTVLLASYTSHGADANL  | Positive |
| P35572 | LLMLLMLLFAAGSESALAGC  | Positive |
| P35578 | LVFGMTPDYIFPVSA DIPVV | Positive |
| P35625 | VLLGSWSLGDWGAEACTCSP  | Positive |
| P35706 | GPLTGAALATPAAAPASLYA  | Positive |
| P35755 | ATLAAALAFSANSFADITVY  | Positive |
| P35759 | VYLVIVVAIIHSSQGVDYCK  | Positive |
| P35775 | VLATCLLGFAQIIYADNKEL  | Positive |
| P35777 | VLVSCLLVFTQIIYALDIKE  | Positive |
| P35778 | LWLAITAENLANTLATNYCN  | Positive |
| P35807 | TLMLLVVCAALSAAQLNFS   | Positive |
| P35811 | VVFAMALGMASTAFQAQDFCS | Positive |
| P35823 | IAAAIVVGSAAPAFADVVIS  | Positive |
| P35858 | LLLSWVALGPRSLEGADPGT  | Positive |
| P35859 | ALVVLLAFWVALGPCHLQGT  | Positive |
| P36222 | QTGFVVLVLLQCCSAYKLVC  | Positive |
| P36233 | AWIFFLVCLAGRALAAPQQE  | Positive |
| P36560 | LVVAAAMGLSSAAFAAETTT  | Positive |
| P36911 | SSENSNISPNAARA AVTGT  | Positive |
| P36917 | IFGASLFSPPIRVFADDTNI  | Positive |
| P36980 | LVSVILISRISSVGGEAMFC  | Positive |
| P37028 | ALVALSFLAPLWLNAAPRVI  | Positive |
| P37042 | VGVLLFTASVAICLAQHWSY  | Positive |
| P37109 | LAALFIVDREVPVSAEKQVF  | Positive |
| P37240 | AMYGLLCLLFSQAVPMCVPPT | Positive |
| P37329 | AGAALSFAVAGNALADEGKI  | Positive |
| P37387 | TLCTSLLLTNVAHAKEVKI   | Positive |
| P37648 | AGGLLMMATAGYVQADALQP  | Positive |
| P37696 | AMGGAQVLSSTGAFADPAPD  | Positive |
| P37699 | IFSVSIISTAIASSAADQIP  | Positive |
| P37726 | AIGSIIAATSFGALAQGGGA  | Positive |
| P37735 | GATALSLALSVPALAEPIVI  | Positive |
| P37889 | ALALVTALTPSPSMAVPWQD  | Positive |
| P37902 | TAILALALSAGLAQADDAAP  | Positive |
| P37921 | STIASLMFVAGAAVAADPTP  | Positive |
| P38008 | CLSFFYLSTISILQANETDT  | Positive |
| P38029 | LLLAGLCCLVPSSLAEDLQG  | Positive |
| P38059 | LAVAPIAATAMPVNAATTIN  | Positive |
| P38368 | ALVVAGLAAASVAQAAPQEN  | Positive |
| P38538 | LASALAITVAPMAFAAEDTT  | Positive |
| P38540 | LALASVFAVSNQALAYDGQN  | Positive |
| P38577 | YQQLDNQNLKKVVGGKYYGN  | Positive |

|        |                       |          |
|--------|-----------------------|----------|
| P38660 | GFGLVSCTFFLAASGLYSSS  | Positive |
| P38683 | LLFLLLSLFMLPAFSADNLL  | Positive |
| P39042 | ALLAAGTLGATPATAVTKPT  | Positive |
| P39045 | TLLGASPALADASGARLTEL  | Positive |
| P39046 | CSVAAPLIQPVQVDADQTPT  | Positive |
| P39049 | LVISSLAIVSSMSYAGVEFS  | Positive |
| P39099 | LSVGLTLSASFQAVASIPGQ  | Positive |
| P39116 | ATALFLGLTPAGANAADLGH  | Positive |
| P39172 | LSAALWGGATQAADA AVVAS | Positive |
| P39176 | LCSFALLFASHTSLAVTYPL  | Positive |
| P39180 | VALSLAAVTSLPVLAADIVV  | Positive |
| P39186 | LAMQAIFFPAPARAQGLVDA  | Positive |
| P39187 | ILALTCLLLPMMASAHQFET  | Positive |
| P39325 | IVSAVSAAMSSMALAAPLTV  | Positive |
| P39653 | AFGIVLSVSAGTTHADELAN  | Positive |
| P39824 | ITGFTPFFNSTHAEAKSIED  | Positive |
| P39844 | FVVASVPYMHQAALAAEKQD  | Positive |
| P39848 | AASLAFFAMSGSAQAAAYTD  | Positive |
| P39873 | LVLVLLL VQVQPSLGKESAA | Positive |
| P40120 | GTSGIASLFSQA AFAADSDI | Positive |
| P40136 | LLFAISSSQAIEVNAMNEHY  | Positive |
| P40199 | LTASLLTFWNPPTTAKLTIE  | Positive |
| P40601 | GMLALSISAISNAHA YNNLY | Positive |
| P40881 | AGSGCISEGAEDNVAQEITV  | Positive |
| P40943 | ALTLLLPMGMTATS AKNADS | Positive |
| P41222 | WMGLALLGVLGDLQA APEAQ | Positive |
| P41271 | MLRVLVGAVLPAMLLAAPP   | Positive |
| P41361 | LLPLLLIGLWGCVTCHRSPV  | Positive |
| P41547 | AFSILVLCQAGGLQAAPFRS  | Positive |
| P41822 | TVAILSIYQETAQAQEQTVG  | Positive |
| P42111 | DVPAAKVLQPTAAYAAETVF  | Positive |
| P42251 | GLTIAQSVGA FEVNAAPNFS | Positive |
| P42254 | SAVSLLLSLVQNAHG ISLKV | Positive |
| P42255 | RRNLVALGLAATVSAGPCDI  | Positive |
| P42256 | LSVASVPLLASLVHGYADPG  | Positive |
| P42512 | LGLLLALSPLAAAVADARKD  | Positive |
| P42517 | AIFFSSLFMC SNVFAGSVSS | Positive |
| P42578 | VLFLT LAVCSSLAYGKEFVA | Positive |
| P42579 | YLLVLSLAFLAVVTSSRTQS  | Positive |
| P42660 | HLLVLIAFTCYTCS DATLWN | Positive |
| P42705 | VVMLLLTARLDPCLPAPPAC  | Positive |
| P42813 | LCLISLLVILPSVFSASSSS  | Positive |
| P42830 | LVLLLLLTQPGPIASAGPAA  | Positive |
| P42889 | KVLALVLLTLAVAYAAPDPR  | Positive |
| P43077 | IFHLLWL CNVVVHAAKVEI  | Positive |
| P43131 | TLAALAVLGTNVVSATSEPV  | Positive |

|        |                       |          |
|--------|-----------------------|----------|
| P43174 | SFEFIGSTDEVDEIKLLPCA  | Positive |
| P43302 | VTLLTLGITGLAHAAGDAA   | Positive |
| P43306 | VAALLLCLQAQLSFSQHWSH  | Positive |
| P43379 | LGLSLTFGLFSPAQAAPDTS  | Positive |
| P43478 | IPAISMLLLSAVSQAASMQP  | Positive |
| P43497 | VASVAFVALANFVAAESAAA  | Positive |
| P43652 | TGFIFFLFFLTESTLPTQP   | Positive |
| P43843 | ALCTFLGLGVSIANAADLPN  | Positive |
| P43972 | LLPAFAAAVVLSACAKDAPE  | Positive |
| P44276 | AVGLTALLGMSVANAHNVWL  | Positive |
| P44526 | AISAALLSAPMMANADVLAS  | Positive |
| P44544 | LCTALFATFTFSANAQTYPD  | Positive |
| P44569 | ALSAFAMLFTSVALAKEAPQ  | Positive |
| P44654 | LAGLFTALFAGSLMASDAPA  | Positive |
| P44737 | SAVLLGLAVSSSASAQDTIA  | Positive |
| P44883 | VAFAIALGSASASFAADNRI  | Positive |
| P45091 | LLTAILLGASVAASAQELTF  | Positive |
| P45323 | ALLIAGLGFSAASAKVTVF   | Positive |
| P45354 | ISLIILTTCGAAAYASTPDF  | Positive |
| P45452 | VLA AFLFLSWTHCRALPLPS | Positive |
| P45523 | ATTMAVALHAPITFAAEAAK  | Positive |
| P45590 | VKFVACFVFVAVASASDFSS  | Positive |
| P45628 | LLALIICSIIDWSEGQFTQE  | Positive |
| P45658 | IMFSLALLLVIGVESGRDGY  | Positive |
| P45662 | LMITACLALVGTVWAKEGYL  | Positive |
| P45696 | LIILFVCSMIIGINAVRIPV  | Positive |
| P45697 | VMISFALLLMTGVESVRDAY  | Positive |
| P45796 | FALLSVFPMLNVDAANRPL   | Positive |
| P45881 | RTLWIMAVLLVGVEGDLWQF  | Positive |
| P46162 | LAVLFLVLSAGSGFTQVRN   | Positive |
| P46163 | LVLLFLVLSAGSGFTQVVRN  | Positive |
| P46165 | LALLFLVLSAGSGFTQGVRN  | Positive |
| P46168 | LLLLVVLSSGSGFTQGVRN   | Positive |
| P46169 | LALLFLVLSAGSGISGPLSC  | Positive |
| P46445 | IFLGGIFSLGNTALAADLAH  | Positive |
| P46739 | NGRRCQRHGRR LAIADANGL | Positive |
| P46883 | LAVALSFAWQAPVFAHGGEA  | Positive |
| P47001 | ALAASVAALSATASAEGYTP  | Positive |
| P47178 | SILAVAAALVASATAASVTT  | Positive |
| P47796 | EVDSVLPGLFRRTYGCGRPA  | Positive |
| P47853 | RPLWLLTLLLALSQALPFEQ  | Positive |
| P48096 | KLHLAVLCLVVSCHAIGLSD  | Positive |
| P48307 | GLSILLFLTEAALGDAAQE   | Positive |
| P48740 | LLYYALCFSLSKASAHTVEL  | Positive |
| P48745 | CLTFLLLHLLGQVAATQRCP  | Positive |
| P48816 | LIIFALVVL CVGSEAKTFTR | Positive |

|        |                       |          |
|--------|-----------------------|----------|
| P48819 | RPLLMLALLAWVALADQESC  | Positive |
| P48842 | FASLLLAALPLLTHAALTYR  | Positive |
| P48982 | APLVLALALALPAAAATPES  | Positive |
| P49051 | MTAAMVAGVVSPVAAAGKTF  | Positive |
| P49121 | RTLWIVALLLVGVEGSLLEL  | Positive |
| P49125 | LFFVVFLCLIISVFAISPAD  | Positive |
| P49141 | LLLLGLASLLFVSDAAPVIH  | Positive |
| P49182 | LSLITFMCIGSKGLAEQLTN  | Positive |
| P49250 | LAVAVVCAWQSPVFAHGSEA  | Positive |
| P49252 | LFSVLTLLSFHAVFSFTPLH  | Positive |
| P49278 | YKILCLSLLVAAVARDQVDV  | Positive |
| P49763 | MRLFPCFLQLLAGLALPAVP  | Positive |
| P49767 | ALLPGPREAPAAAAAFESGL  | Positive |
| P49862 | PLQILLLSLALETAGEEAQG  | Positive |
| P49921 | AGLLLLTLCVVGCSQHWYS   | Positive |
| P50228 | AFLLLFTLPQHLEAAAPSSV  | Positive |
| P50229 | AVLLCTMALWNEVFSAPYGA  | Positive |
| P50401 | LVAVPLTTLATSASAAPVHV  | Positive |
| P50448 | TLLLLLLLAGDRVTSDMIVG  | Positive |
| P50470 | TVLGAGFANQTTVKAEGAKI  | Positive |
| P50694 | LSLSLTILSFGGAHAATISF  | Positive |
| P50828 | LGLCCSLAIAHPLSLTAGPK  | Positive |
| P51456 | FYLLGFCLLQGQVTGRVITYE | Positive |
| P51460 | PAWALVLLGPALVFALGPAP  | Positive |
| P51529 | LLFALAGPSAGRAEAAAGGI  | Positive |
| P51688 | PACCALLLVGLCRARPRNA   | Positive |
| P51740 | WVLLLLGFRLQLSLSVIPVE  | Positive |
| P51752 | PFLSVGLLLGTTAHAATPLK  | Positive |
| P51868 | YLLVVGLYLLSFSRAEEGLN  | Positive |
| P51918 | LWLLLAGTVFPQGCCQHWSY  | Positive |
| P51919 | LLLLVVVMMMSQGCCQHWSY  | Positive |
| P51925 | LLGLLLCVGAQLSNGQHWSH  | Positive |
| P52013 | AAVLAVGALAQGDDAKGPKV  | Positive |
| P52193 | LPVPLLLGLLGLAAADPTVY  | Positive |
| P52663 | LFSSCLISISFFSQANTKGI  | Positive |
| P52682 | LFSVCLALSAFNAHANKSDA  | Positive |
| P52699 | LSVFFIFLFCSIATAAESLP  | Positive |
| P52706 | LHLFVLLLQYSEVHSLATTS  | Positive |
| P52753 | ISFLASLAMASPAKRGGGGG  | Positive |
| P52798 | LWAAFLGSPLRGGSSLRHVV  | Positive |
| P52823 | QNSAVLLVLVISASATHEAE  | Positive |
| P53366 | ALMYLGSLAFLGADTARLDV  | Positive |
| P53543 | FLLFFFMNFFSPAQSYLLTH  | Positive |
| P53616 | AASLIGYSTIVSALPYAADI  | Positive |
| P53634 | AALLLLSGDGAVRCDTPAN   | Positive |
| P54107 | LFLVAAACLLPMLSMKKKSA  | Positive |

|        |                      |          |
|--------|----------------------|----------|
| P54318 | LLCWIVSLLLATVGGKEVCY | Positive |
| P54421 | AVVLGSTLFAGAASAQSIKV | Positive |
| P54423 | ALIFSLFSPGTKAAAAGAI  | Positive |
| P54484 | LMLTLVVAPKEKAEEASSGW | Positive |
| P54507 | SAALGLALVGGGTWAAFNDI | Positive |
| P54660 | LALVTLALLFTLSSAQYTLS | Positive |
| P54803 | AVPLLLCALLAPGGAYVLDD | Positive |
| P55000 | QLLLVAAWSMGCGEALKCYT | Positive |
| P55058 | LFGALFLALLAGAHAEFPGC | Positive |
| P55083 | LPLLLLLSTPPCAPQVSGIR | Positive |
| P55145 | LAVALALSVLPGSRALRPGD | Positive |
| P55319 | VVLLVVAVAAALCSAQLNFT | Positive |
| P55320 | LLVIVVVLCSVTQQASAWF  | Positive |
| P55773 | ALSCLMLVTALGSQARVTKD | Positive |
| P55774 | AALLVLVCTMALCSCAQVGT | Positive |
| P55847 | IVVVGTSLLFDTASASFIDN | Positive |
| P55929 | SLSLGAMFASAGVMAANEPI | Positive |
| P55955 | VVCLLLAACALECTARLQNV | Positive |
| P56202 | PSCLLALLVAGLAQGIRGPL | Positive |
| P56526 | AWLVPLAYGASQSLLSTTAP | Positive |
| P56595 | VVLSMVLEGPAPAQAAGEIS | Positive |
| P56611 | LFISCLLLIGIVVECKEGL  | Positive |
| P56612 | ILFISCLLLIDIVVGKEGY  | Positive |
| P56626 | FFFLAISLGSPTAIGDVSFD | Positive |
| P56637 | FLMCLHIFPIMGVLGKKNY  | Positive |
| P56742 | FFMFSLLFLAALGSCAHDNR | Positive |
| P56829 | MALVLVSYGPGGSLGCYLSQ | Positive |
| P56972 | LTALIFLGLIAIAYCGWINE | Positive |
| P58154 | IFCLACLWIVQACLSLDRAD | Positive |
| P58294 | TRVSIMLLLVTVSDCAVITG | Positive |
| P58370 | TLVVVTIMCLDLGYTLECKI | Positive |
| P58738 | VVGAVLAALVAGGSCGPPKV | Positive |
| P58912 | FLLTAFVVLTDLGATEDTEK | Positive |
| P59206 | LALLFFLASPEGAMASDGTW | Positive |
| P59665 | AILAAILLVALQAQAEPLQA | Positive |
| P59807 | AMTLGLLSAPYNAMAATSNP | Positive |
| P60042 | LAALCIVLALGGVTGAPSDP | Positive |
| P60153 | PLLLPQQLQLVQFQEVDT   | Positive |
| P60212 | LFISCFFLIGTVVECKNDGY | Positive |
| P60213 | LFISCFVIGMVVECKDGYL  | Positive |
| P60214 | LFISCFFLIDMIVECKKEGY | Positive |
| P60215 | LFISCFFLIGMIVECKDGYL | Positive |
| P60302 | TLVVVTIVCLDLGYTLKCNK | Positive |
| P60568 | LLSCIALSLALVTNSAPTSS | Positive |
| P60616 | TLVVVTIVCLDLGYTIVCHT | Positive |
| P60770 | TLLVVTIVCLDLGYTLECHN | Positive |

|        |                         |          |
|--------|-------------------------|----------|
| P61153 | PLAGASLASPATAPASLYAP    | Positive |
| P61312 | FGCISLLYLLPGTSLGSLGK    | Positive |
| P61316 | TCALLSSLVASSVWADAASD    | Positive |
| P61626 | LIVLGLVLLSVTVQGKVFER    | Positive |
| P61629 | VII LGLVLLSVTVQGKIFER   | Positive |
| P61769 | ALAVLALLSLSGLEAIQ RTP   | Positive |
| P61823 | LVLVLLLVRVQPSLGKETAA    | Positive |
| P61855 | LIAAVLFMLLACVQCQLTFS    | Positive |
| P61870 | VASLGYALPGKLQSRDVSTS    | Positive |
| P61916 | AATFLLLALSTAAQAEPVQF    | Positive |
| P62023 | RALWIVAVLLVGVEGHLLQF    | Positive |
| P62376 | TLVVVTIVCLDLGYTMTCCN    | Positive |
| P62520 | ALLVLAFAEAQVGESDGECG    | Positive |
| P62593 | ALIPFFAAFC L P VFAHPETL | Positive |
| P62928 | LFATLGMFLTKNVGAISCNG    | Positive |
| P62931 | LFATLGMFLTKNVGAASCNG    | Positive |
| P63090 | LALIFILAAVDTA EAGKKEK   | Positive |
| P64534 | ALLVTSAAWAAPATAGSTN     | Positive |
| P67788 | TVFLMFIAFVIIAE AQLTFT   | Positive |
| P67861 | ILFCIQGWPSGTVQGQVRPF    | Positive |
| P67876 | TAVSVLAAPSPLDARATWTC    | Positive |
| P67930 | AFTLLCLPWTQVVGAFPAMS    | Positive |
| P67970 | LLALLVFSGPGTSYAAANQH    | Positive |
| P67976 | LLLALGLALACGVQAIIVTQ    | Positive |
| P67977 | LTILGLVLLSVTVQGKIFER    | Positive |
| P68248 | LACSLLLLAVPPGTAGPSQP    | Positive |
| P68638 | SVTFLTL LGIGCVLSCCTIP   | Positive |
| P69241 | LVLFAAFEAPT MVEA QKLCE  | Positive |
| P69770 | LLSIVALGMVATVICSCDSE    | Positive |
| P74917 | LFSALLLVAGQASAAVGSAD    | Positive |
| P76172 | CAALLLALASPAVLAAPGSC    | Positive |
| P76341 | SVATAAFSLPSLVNAAQQNI    | Positive |
| P76342 | GISATALSLPHAAHADLLSW    | Positive |
| P76344 | AVALGVFIVSAPAFSHGHHS    | Positive |
| P76520 | ATMVTAILASSTVWAADNAP    | Positive |
| P76773 | AIILLSSLTSASVFAGAYVE    | Positive |
| P77202 | KKILLLALLPAIAFAEELPA    | Positive |
| P77214 | VAMFSLFTVIGFNAQANEHH    | Positive |
| P77269 | LLMATLLGSALFARAAEKEM    | Positive |
| P77348 | TCCALLVSSISLSYAAEVPS    | Positive |
| P77747 | ALLIPALLAAGAAHAAEVYN    | Positive |
| P77754 | VASTLALGAANLAHAADTTT    | Positive |
| P78556 | LMSVLLLHL CGESEAA SNFD  | Positive |
| P78581 | HSRMAVAALAAGANAASFTD    | Positive |
| P78733 | VALAAVTS AAPATTQATCPD   | Positive |
| P79208 | LARALLLCAAVVCGAANPCC    | Positive |

|        |                       |          |
|--------|-----------------------|----------|
| P79263 | LVLPLLLAVLQSTTAHKNDI  | Positive |
| P80022 | LILLIITQCLSVLNAAKDFD  | Positive |
| P80035 | LTAASVISTLGTTHGLFGKL  | Positive |
| P80036 | TAWGLPRGRPTGQPHATPTK  | Positive |
| P80060 | LALCAAVLLVVLVQAEKCT   | Positive |
| P80067 | AALLLVLLGVCTVSSDTPAN  | Positive |
| P80090 | TVFLTLLNVSITRGTTQHT   | Positive |
| P80098 | CLLLTAAAFSPQGLAQPVGI  | Positive |
| P80109 | GLLMLLGFLCPRSSPCGIST  | Positive |
| P80162 | ALLLLTPPGPLASAGPVSA   | Positive |
| P80188 | LWLGLALLGALHAQAQDSTS  | Positive |
| P80195 | LCVLLLASLAATSLAILNKP  | Positive |
| P80221 | LALLLLTPPGPLASAGPVAA  | Positive |
| P80245 | TLVVVTIVCLDLGYTLKCNQ  | Positive |
| P80284 | LLALAVVLSAPAARAEAAA   | Positive |
| P80311 | VGSVFFLLLPGPSAADEKKK  | Positive |
| P80325 | CLLLTVSAFSAQVLAHPGIP  | Positive |
| P80356 | LIFALLAMAATMATAQFDPS  | Positive |
| P80384 | MKFIALFALVAVASAGKMTF  | Positive |
| P80391 | ILLAQGAAGSSLALGKREK   | Positive |
| P80392 | ALQVSPGLSSPKRDMFLCKR  | Positive |
| P80401 | AAAAALLALAAPGFAATHEV  | Positive |
| P80426 | LLSALLGCLATAYAAPAEG   | Positive |
| P80463 | LLGILFLASLSASFISLRE   | Positive |
| P80513 | LAVALALSVLPASRALRQGD  | Positive |
| P80561 | AQAAGAAAPTAAAAAAPDIP  | Positive |
| P80603 | LLASALAVVAGSASAAAFQL  | Positive |
| P80604 | LLACCLMALPISSFSIGNNN  | Positive |
| P80672 | LVAALAAGAFSAANATPLEE  | Positive |
| P80686 | YKFVVFAAALAYANAGLIGA  | Positive |
| P80915 | TVMMLIAMASEMVNGSAFTV  | Positive |
| P80961 | VATIVLLALAQGSFAQGAAD  | Positive |
| P80963 | RTLWIVAVLLVGVEGSMYEL  | Positive |
| P80964 | WAGVSVFLPLDPVNGDQHLP  | Positive |
| P81019 | WAGASVFQQLHPVNGGDIPD  | Positive |
| P81025 | SLLVLMMVSWPGSQA VGGPQ | Positive |
| P81054 | SVMVALVSLAVAVSANPGLS  | Positive |
| P81058 | VCLVFLASFALVCQGQVYKG  | Positive |
| P81186 | VAAASGAGFGSLALAADNRP  | Positive |
| P81238 | RFLILSAVLAGPALAGDTSP  | Positive |
| P81264 | LLCLLLGLALQGAASRAHQ   | Positive |
| P81294 | IAVLVFLCAIVSCYSDNPID  | Positive |
| P81295 | AATLAISLHMQEAGVVKFDI  | Positive |
| P81370 | SALLFIAFLFTCARGATFNI  | Positive |
| P81383 | LLLLVLFLGVPRSENVHVINL | Positive |
| P81417 | IVLLAALVLLGQTEAGGLKK  | Positive |

|        |                       |          |
|--------|-----------------------|----------|
| P81418 | LVMILLLSVISAVMSAGCIK  | Positive |
| P81429 | IVLFYLITCIFTCSASDAPK  | Positive |
| P81446 | GQVFGATVKAETKFSYERLR  | Positive |
| P81447 | LCILLASLAATSLAILNEP   | Positive |
| P81497 | KKLLLLLGLVALSECLYKVP  | Positive |
| P81498 | KWMVVALVCLQLLEAKVTKV  | Positive |
| P81534 | FALLFLFLVPVPGHGGIINT  | Positive |
| P81549 | AIAVPLLGLLPAAQAASTAV  | Positive |
| P81605 | TLLFLTALAGALVCAYDPEA  | Positive |
| P81608 | KLLLLLCLGLTLASSHKEAG  | Positive |
| P81623 | FPLLFLLSAPQDSSGLHTKG  | Positive |
| P81715 | SAVPAALAAPSAVAAAPTPP  | Positive |
| P81761 | IALFLTVMATLSEARCGPC   | Positive |
| P81783 | TLVVVTIVCLDLGYTMKCKI  | Positive |
| P81828 | LLPLGLSLLMSSLLALQCFR  | Positive |
| P81894 | ASLALSVFCAGLAFAADELT  | Positive |
| P81941 | LMMAIFVLMVEPGECGWGSF  | Positive |
| P81999 | TLCLLLLYLLGAAIAGRDFY  | Positive |
| P82007 | AMIVMAQLMVHPSVAITCND  | Positive |
| P82102 | LLAVVVAVFVAGTEAHPHVC  | Positive |
| P82103 | LLAVLVAVFVAGTEAHSHAC  | Positive |
| P82143 | LFCCLLGTFLAIGMCLECEV  | Positive |
| P82144 | HTICLLFIFIARGNSRSCDY  | Positive |
| P82187 | LVVNILALTLPFLGAEVQNQ  | Positive |
| P82290 | FVVLAVLLLCSQTEAGRLKK  | Positive |
| P82358 | CLLAVLILVHESNAQCRRL   | Positive |
| P82384 | KFVIVLACLLAVVFANEEAD  | Positive |
| P82592 | LIAMAVLLLGTGQSEAGGLKK | Positive |
| P82593 | LLVAAGLVPTATAHAEDVTD  | Positive |
| P82594 | AAAGALTAVPGVAHAAPRPA  | Positive |
| P82662 | TLVVMTIVCLDLGYTLICFI  | Positive |
| P82683 | GLVFGATVKAETKFSYERLR  | Positive |
| P82818 | FIVAMSLVSCSTAAPAKIPI  | Positive |
| P82900 | LALVVLAAAPGGARAACQAS  | Positive |
| P82943 | ALAFLLTLAVLHSEANEEPA  | Positive |
| P83234 | LCFFADQENGKALASPPGN   | Positive |
| P83313 | VTLMVTMLVMQPSEGKGVWD  | Positive |
| P83326 | ILFISPLSQRPSVKAENHLI  | Positive |
| P83371 | TTLLAVVLIATQSSATRTR   | Positive |
| P83400 | IAFFLTVMIATHSEARCPPC  | Positive |
| P83403 | FIALILALSVSQSEAGWLKK  | Positive |
| P83472 | VALLALAFLCADISAVKTSW  | Positive |
| P83519 | SACWFVFLSLSGAKGNCPQ   | Positive |
| P83544 | ATASATPAPAPAAQQSLYAP  | Positive |
| P83618 | VIIVSLSIFSWGGNARSDYP  | Positive |
| P83632 | WKLIIVTILAVGVLCDDIAT  | Positive |



|        |                       |          |
|--------|-----------------------|----------|
| P83636 | WLVVVVGLLVHQTTRARYVFE | Positive |
| P83673 | LFCVVVFATAVCTYGSADPC  | Positive |
| P83880 | VLVCLFLAMAQPSQASYFSA  | Positive |
| P83886 | TVAAILTILASTCMARNVLT  | Positive |
| P84298 | KFFAVLALCIVGAIASPLTA  | Positive |
| P84516 | VLICSSSTATAADGNARQPP  | Positive |
| P84685 | IILALLLIGLDEGEALDGYF  | Positive |
| P84688 | IVLALLLIGLEETEALDGYF  | Positive |
| P84693 | IFFIGCLMLIDLVAQSRSGY  | Positive |
| P84777 | VIFILCSTCYISVDSQIDTN  | Positive |
| P84805 | FSLCLAAVLRQSFQNVDFN   | Positive |
| P84809 | FIAFISIIAFSMVCGGNVFP  | Positive |
| P84810 | GIIVILFSLIGSIHGISGNY  | Positive |
| P84838 | LATTLMAAAPVAANATIITG  | Positive |
| P84843 | FSVLVLLIATFVAADCEPR   | Positive |
| P84888 | AAMLGLMVLAGGAQAQDKPR  | Positive |
| P84908 | VTTIVLAQSSLAQAADSTS   | Positive |
| P85045 | GKYISWEDSCSYLQLQKYER  | Positive |
| P85197 | MKLIVLAAFIGVCAGGALPG  | Positive |
| P85213 | SFLVIVSSPQNAVQADTLIG  | Positive |
| P86009 | RFAVTLFAVITSSTCKKYSC  | Positive |
| P86100 | YQILFASILAAISATSADF   | Positive |
| P86242 | AAATGITLAAGPASADIPIG  | Positive |
| P86407 | VIFIVTMLIVDEVNSFKFGS  | Positive |
| P86870 | LILITTIINLSFSEANNYCK  | Positive |
| P86872 | LCLAVVIFIINDVSSQGLGS  | Positive |
| P86875 | QALVNGDSCGSNCEKSERPK  | Positive |
| P91627 | FKFVMVFAVLGVAAAGVAHV  | Positive |
| P91629 | FKFVMVFAVLGLAAAVAPVS  | Positive |
| P91745 | LLASVAIMLIATVNAEYNVA  | Positive |
| P92192 | LIVFVALFAMAVARPNLAEI  | Positive |
| P92201 | LIVFVALFAVALAAPAAEEP  | Positive |
| P93543 | AICGLGIHGAHPTHSAPPTV  | Positive |
| P94127 | ALSLGAAGLATPARAATGAD  | Positive |
| P94356 | IIIGNMIGGGGGSEATSKTS  | Positive |
| P94421 | VVISACGNQSTSSKGSDTKK  | Positive |
| P94449 | VFSLLLVLLPGKAFGAVDFP  | Positive |
| P94522 | LAAGLIFTSAAPAEAAFWGA  | Positive |
| P94691 | VAAALVGTMMAMAAQAVPQVP | Positive |
| P95470 | LSALALLCASLACGAKQVDV  | Positive |
| P96156 | STLTASCLMAFN SYAAVDCS | Positive |
| P96729 | GMTAAAAGGAGTIHAQQPET  | Positive |
| P96740 | CFLVPIMTKAEIAEADTSSE  | Positive |
| P97430 | VLLALGILAPWTVEGGKNDA  | Positive |
| P97515 | LVLLLCFTLLWGCQSAPQGT  | Positive |
| P97535 | FWLWGSLLWLSIGRSGNVPP  | Positive |

|        |                      |          |
|--------|----------------------|----------|
| P97884 | AGVLLAYLCSQSEAASNFD  | Positive |
| P98066 | ILIYLFLLWEDTQGWGFKD  | Positive |
| P98140 | LLLGALLVSLESTVSTPPWK | Positive |
| P98184 | YSVLALYVGAHVTEVDINF  | Positive |
| P9WG65 | VLMFGLANTPRAVAADERLQ | Positive |
| P9WIP1 | AMAAIATFAAPVALAAYPIT | Positive |
| P9WIR7 | SASLVTVAVPATANADPEPA | Positive |
| Q00017 | TAALAPLFFLPALATTVYL  | Positive |
| Q00293 | SHTLGLLALGATAEAFSRSR | Positive |
| Q00855 | SKILCLSLVAADVADQVDV  | Positive |
| Q00870 | SVLVAGVVAVSAALASKHPK | Positive |
| Q00901 | VQSPQKCYACTVDKGSYADT | Positive |
| Q00945 | YLLTAAVLSLSLTDACFIRN | Positive |
| Q01117 | ISLSPIVVARYILRRDCTTV | Positive |
| Q01129 | KATLVLFLLAQVSWAGPFEQ | Positive |
| Q01172 | IFSAAAVFAGSAAVGVSG   | Positive |
| Q01269 | ALACLALLASASLQAQESRL | Positive |
| Q01460 | LTLLLLPLLERLSAEDCPC  | Positive |
| Q01490 | VIFLAIVALATLVSASTNPK | Positive |
| Q01528 | AIVIIIFSTLTFSEAWVNDW | Positive |
| Q01584 | LSFALVALSALCVYGDVPIQ | Positive |
| Q01682 | SGISLWLLAASIVHAGKSQF | Positive |
| Q01774 | FKILLVCALAALVAANENAE | Positive |
| Q02083 | SLLLLLAGAGLSAASPPAA  | Positive |
| Q02113 | SLAAILLIPSVSFAADSNI  | Positive |
| Q02114 | MCFLGLILFVPTALADNSVK | Positive |
| Q02126 | ALVLVALAAFPVHSGVCN   | Positive |
| Q02246 | AVALVSSSAWSSALGSQTTF | Positive |
| Q02567 | IAFVALAAAVRAAPTAVCPD | Positive |
| Q02596 | TVLLFVSLAATSLALLPGSK | Positive |
| Q02747 | SALCLLGAWAALAGGVTVQD | Positive |
| Q02809 | LLLALLGWLLLAELKGDAL  | Positive |
| Q02834 | ALAAATVAGASPAQAIAGAP | Positive |
| Q02934 | DEVGSKTHGDLTAENKNGGY | Positive |
| Q02942 | LLCLTLLFSASAVLAMPTPE | Positive |
| Q02988 | ADLRAYVLVLLVISGLYQGS | Positive |
| Q03011 | VLGLGLSVVAGSALAADQGH | Positive |
| Q03035 | LGALGALGAAPAAHADWNNQ | Positive |
| Q03044 | SLCLMLAGLCSLVTSHLTEE | Positive |
| Q03178 | KKSLVASALVATSLAAYAPK | Positive |
| Q03180 | KKPLVVSALAATSLAAYAPK | Positive |
| Q03352 | LFIGVSLRPLGHGIPAPYAV | Positive |
| Q03383 | DKLLLLVTLVCGTQAFYMF  | Positive |
| Q03405 | PLLLLHTCVPASWGLRCMQ  | Positive |
| Q03472 | LLGVLFLLHCTPVLCGCDNP | Positive |
| Q04064 | LAAALLAGFAGAAQAETSVT | Positive |

|        |                       |          |
|--------|-----------------------|----------|
| Q04457 | RIFLVSVILINACWAGPIVE  | Positive |
| Q04672 | FLLALFSNLAFGKCKETEVE  | Positive |
| Q04681 | LAAALVFGINSVATAENETP  | Positive |
| Q04756 | LLLLLLLLLPRGFQPPGGN   | Positive |
| Q04791 | LILTAGITALVATGQKAEQP  | Positive |
| Q04962 | LLGSLVLSLESALSAPPPWK  | Positive |
| Q05156 | LGTALTALPVQQAGAEVEEQ  | Positive |
| Q05186 | LALGLLLALVLALRAKPTVR  | Positive |
| Q05202 | MIGAALGTLSSASSWAAAATD | Positive |
| Q05443 | GVFPLLLALIGGASSTYPDY  | Positive |
| Q05489 | GAAGLTMAASPAAVAADTYA  | Positive |
| Q05538 | TLFLLFSVLLLSASAEQCGS  | Positive |
| Q05811 | LASAAFAASTPVLAADAIV   | Positive |
| Q05819 | YLIVLQQFLCSAYAQQKKS   | Positive |
| Q05884 | TALAAALLPPLAARADTPPA  | Positive |
| Q05894 | YICIYINILYVCVSGHGYMT  | Positive |
| Q05895 | WGV LALLLLCSYTCGSQDLQ | Positive |
| Q05918 | LALMLGLSSSATAVAADAPQ  | Positive |
| Q05JY7 | ASSLLIGCVIPTVKASQSAI  | Positive |
| Q06006 | ACVLLGSCASSLALAGGAEG  | Positive |
| Q06153 | FLSSAMAAPYSGNSNSDSYD  | Positive |
| Q06529 | AASVLALGLASNAGAEPTAE  | Positive |
| Q06575 | IFVLMVNVLNDQVSCSGPPG  | Positive |
| Q06576 | AGFWILVLSITSALADSNNQ  | Positive |
| Q06577 | IWILALSVLMHVVCSETQGN  | Positive |
| Q06749 | GALAAALLASQVSQAADLVP  | Positive |
| Q06851 | LTTIFAAMIPQTVSAATMTV  | Positive |
| Q06987 | NILCLSLMTALPVYAENVQA  | Positive |
| Q06988 | VNQAAMVLPVFLLSACLGGG  | Positive |
| Q07081 | YICLLTLVLIHAAAFVAQN   | Positive |
| Q07092 | PGLWLLGLWATFGHGANTGA  | Positive |
| Q07154 | VVGAVLAALVVGSGCGPPKV  | Positive |
| Q07203 | ERFALWFIFLAGSLAQEDLV  | Positive |
| Q07325 | FLLGIILLVLIGVQGTPVVR  | Positive |
| Q07558 | LFVVFLAVCICVSQAVSYTD  | Positive |
| Q07654 | CMLGLVLALLSSSSAEEYVG  | Positive |
| Q07792 | LSLVLFFCLSAASQASEKLL  | Positive |
| Q07831 | FVLIFAVAFVTLRQGPIVC   | Positive |
| Q07WU7 | ATLMGTAGLMGTAVAADNLA  | Positive |
| Q08127 | LASAVLCLLAGQVLSICSPV  | Positive |
| Q08380 | PRLFWVWLLVAGTQGVNDGD  | Positive |
| Q08738 | RVFLAICLSLTVALAAETGK  | Positive |
| Q08879 | LLLSSLSLAARANADISME   | Positive |
| Q08IS0 | LLCALSSTAIAPTFAADDDE  | Positive |
| Q09022 | AIVFFLVCVITLGEALKCVN  | Positive |
| Q09098 | TLLIVILSFLCFVEGLICNS  | Positive |

|        |                        |          |
|--------|------------------------|----------|
| Q09117 | LRDPIAEIERSNCKIAHLRL   | Positive |
| Q09131 | ACVMCNGGSSSPFIRKVEKT   | Positive |
| Q09140 | GFWFATLITICYAAKPLD     | Positive |
| Q09332 | CVSVVLIALYTPTSGESSQS   | Positive |
| Q0GY40 | LTVLCFLGIVTIVSCGWMSE   | Positive |
| Q0IQK9 | LVAALLLAAPHAAVAITCGQ   | Positive |
| Q0P9X8 | VFALGACVAFSNANAAEGKL   | Positive |
| Q0TV31 | LATSLWAGASTKVYAWDGKI   | Positive |
| Q0Z8B6 | GTCLAGIGTGIKVDAATYYG   | Positive |
| Q10746 | LLMATSHQPSGTVVARELRC   | Positive |
| Q10E50 | AVVAPPAAALNIGLQSAGDG   | Positive |
| Q10NX8 | PVVVVVSLLVGASRAANVTY   | Positive |
| Q10ST8 | AMVAACGGGVVGVAGAGCNA   | Positive |
| Q12127 | STVASIAA VA AVASAAANVT | Positive |
| Q12546 | ALLVALSATAAQARPVNDER   | Positive |
| Q12841 | LALALALVAVAWVRAEEELR   | Positive |
| Q13007 | GFTLLLWSQVSGAQGQEFHF   | Positive |
| Q13162 | LPLLLFLLPAGAVQGWETEE   | Positive |
| Q13231 | WAGFMVLLMIPWGSAAKLVC   | Positive |
| Q13421 | LFLFSLGWVQPSRTLGET     | Positive |
| Q14002 | TASLLTFWNLPNSAQTNIDV   | Positive |
| Q14112 | PVLLLLPLLMLRAAALHPDE   | Positive |
| Q14210 | LLAALAVATGPALTLRCHV    | Positive |
| Q14520 | HVLLLMALVGKTACGFSLMS   | Positive |
| Q14624 | LVLLSLLAIHQTTTAEKNGI   | Positive |
| Q14641 | AIWLLSQLLRESLAAELRG    | Positive |
| Q15084 | VLGLVSCTFFLAVNGLYSSS   | Positive |
| Q15465 | LLVLVSSLLVCSGLACGPGR   | Positive |
| Q15582 | ALALALALGPAATLAGPAKS   | Positive |
| Q15848 | LGAVLLLLALPGHDQETTTQ   | Positive |
| Q16270 | GAAGLLLLLLPLSSSSSSDT   | Positive |
| Q16552 | VSLLLLLSLEAIVKAGITIP   | Positive |
| Q16568 | GAALLMLPLLGTDAQEDAE    | Positive |
| Q16627 | VAAIPFLLITIALGTKTES    | Positive |
| Q16663 | ALSCLMLVAVLGSQAQFIND   | Positive |
| Q16674 | VIIILSAFSGPGVRGGPMPK   | Positive |
| Q16927 | LAKLLLLALAGLTAAYQYEN   | Positive |
| Q17043 | FLALGLLIFVTSCSGRRVCE   | Positive |
| Q17058 | AVIVFCLMALSIVDAAWKPL   | Positive |
| Q17060 | LLVVCLGIACQDVTSAAVNH   | Positive |
| Q17128 | VLIVVVAIALVLCEAQVNFS   | Positive |
| Q18184 | TFLLVAITLMTFSSAQPIDE   | Positive |
| Q1RP79 | RILWIVAVCLIGVEGNLFQF   | Positive |
| Q1XG90 | LILFCVVASASVVYSSISDQ   | Positive |
| Q1ZY03 | RTLWIVAVLLVSVEGHLLQF   | Positive |
| Q1ZYQ8 | AMVVALVFLVRGAWCGPPKV   | Positive |

|        |                        |          |
|--------|------------------------|----------|
| Q20224 | FLILLAFCGATLVAAEQLPE   | Positive |
| Q23997 | KALAIVSLCLASIQASKVGA   | Positive |
| Q24824 | IFVLIFAIAFAATREGAILC   | Positive |
| Q24825 | FVLCLASQEKQQDREIPVLC   | Positive |
| Q25055 | ILGLACIIAVASAMPYGP GD  | Positive |
| Q25154 | VVVMVASLGTSGVGGRSVEG   | Positive |
| Q25255 | GCLLLMVAAIGKTS AIYSMS  | Positive |
| Q25589 | VVVVVVASLASSGVQGRSVEG  | Positive |
| Q26292 | LIVSASMLIESLVNADGYIK   | Positive |
| Q26377 | LLLPLFLFTLSMCMGQTFQY   | Positive |
| Q26427 | LPFVLVLLVATSALAAPSVV   | Positive |
| Q26636 | TVLVALLALVALTQAISPLD   | Positive |
| Q26643 | LKLAALLGVLALVQAEEQTY   | Positive |
| Q27081 | LFALASATLG NKVSRVG VLF | Positive |
| Q27270 | FVICLILVVAVSAAPDHHDG   | Positive |
| Q27441 | VVLLLSCMAVLSVRADNSEM   | Positive |
| Q27908 | LHLTALCVVIPLCYGASMFK   | Positive |
| Q27967 | LVIFVLGMNHW TCTGFPVYD  | Positive |
| Q28042 | CVGLLLVLKHHDGAAHKLVC   | Positive |
| Q28085 | PAKIVWLVLWTV CVAEDCKE  | Positive |
| Q28388 | LLAMGLILPRRPHALHMG P   | Positive |
| Q28631 | LLGLLLLLLELPPVTGTGADK  | Positive |
| Q28862 | KTVLILLSILGMACALSMKN   | Positive |
| Q28989 | KDMVLILCLLKMSSAVPAFP   | Positive |
| Q29143 | IACLALSLVGMTSSEKLLD    | Positive |
| Q29411 | QTGFVALVLLQSCAAYKLVC   | Positive |
| Q29616 | LLCLAGLAFVSETAAVHHES   | Positive |
| Q2A783 | FILALLALTATTAIAQLETT   | Positive |
| Q2FV52 | GVTGYAAGTGHQAHA AEVNV  | Positive |
| Q2FXC2 | FAENISNQPHSIAKAEKNVK   | Positive |
| Q2FXC3 | IGTTLVEEVQQTAKAENNV T  | Positive |
| Q2FXC4 | INAAVVEETQQIANA EKNVT  | Positive |
| Q2FXC8 | VGTTMVEGIQQTAKAENTVK   | Positive |
| Q2FZL3 | ILSLGAFANNNKAKADSHSK   | Positive |
| Q2HZ28 | RTLWIMAVLLVGVEGSLVQF   | Positive |
| Q2KJF1 | LLLWGLSLSPVTEQATFFD    | Positive |
| Q2NME3 | LFICCFFLIGMVVECKDGYL   | Positive |
| Q2PG81 | RTLWIMAVLLLGV EGSLEVEL | Positive |
| Q2PGV8 | LLGLGAATPTDYSTSSYSKN   | Positive |
| Q2PGY1 | LASGAFSATADLSKRESYTS   | Positive |
| Q2U4L7 | SFCLSVASLVSYAGAASTFS   | Positive |
| Q2ULM2 | RSLLWASLLSGVLAGRALVS   | Positive |
| Q2YHJ2 | RTLWIMAVLLVGVEGSLLEF   | Positive |
| Q2YHJ3 | RTLWILAVLLLGVKGNLLQF   | Positive |
| Q2YHJ4 | RTLWIMAVLLVGVEGSVIEL   | Positive |
| Q2YHJ6 | RTLWIMAVLLLGVKGNLLQF   | Positive |

|        |                       |          |
|--------|-----------------------|----------|
| Q2YHJ9 | RTLWIMAVLLVGVEGSVIQL  | Positive |
| Q30HU9 | RTLILCVCLFGLTFAVPCID  | Positive |
| Q38L02 | FGLLVVFLSLSGTGADCPSE  | Positive |
| Q39527 | ISITFYLLLLNKNVNSEEALS | Positive |
| Q39528 | AFITIYLMMLHRVNSSDSLS  | Positive |
| Q39529 | AFITLFLMMLNRVNSSDSLS  | Positive |
| Q39649 | IALFAVALLVADAYAYRTTI  | Positive |
| Q39688 | TILLFFIQRIDFCHTLVPAN  | Positive |
| Q39962 | LLLVSFCLKDRHFCSADPTDG | Positive |
| Q3C258 | TIFLVLGIVIVYSVESSTPD  | Positive |
| Q3HLQ4 | RTLWIMAVLLLGVEGNLLQF  | Positive |
| Q3J164 | ALAAIAAFAALPALAQEGDP  | Positive |
| Q3L1D1 | RLLSLALLGIQVARSAITYQ  | Positive |
| Q3L245 | RLLSLALLGIQIARGAITYQ  | Positive |
| Q3MUH7 | LAAGSFAALPEMTSAAPSEP  | Positive |
| Q3UN54 | LLLLGIFLRVGFQLALTCVS  | Positive |
| Q3V1G4 | PLVLCFALVVAQVWGSTTPP  | Positive |
| Q3Y5Z3 | LQGALLLLLALPSHGEDNME  | Positive |
| Q3YBN2 | LSTMCLVHVCGNIFCLFETT  | Positive |
| Q3YJT5 | VLIFMILATTSSTFATLGEM  | Positive |
| Q40772 | LAISIWMLMLTPPASSNIVFD | Positive |
| Q41015 | FLFVFITNLSLAFSNEDVEQ  | Positive |
| Q41162 | SISFFFLLLLKNVNSTGSL   | Positive |
| Q41260 | VVAALLAVFVGSQAQGIKVP  | Positive |
| Q41350 | LPLSLLFTLLSLSQSTPNF   | Positive |
| Q41638 | WTCLILLSLASASFAANPRT  | Positive |
| Q41649 | LIFTIFIISALVAAKSAAD   | Positive |
| Q42502 | VLFFMILATTSSTCATLGEM  | Positive |
| Q43413 | LMMLLVFATDMMAEAKICEA  | Positive |
| Q43767 | LVALVAAMLLVAADAAISCG  | Positive |
| Q43871 | LVALVAAMLLVAADAAITCG  | Positive |
| Q44642 | STIMLVGAFLPAFAQENQM   | Positive |
| Q44856 | SLLITVLTAWGWAAASSQDS  | Positive |
| Q45071 | LVLLSCLSGKSAYAATSTT   | Positive |
| Q45340 | ALALAGMARLAPAAAQAPQP  | Positive |
| Q45Z11 | TLVVVTIVCLDLGYTMTTCYN | Positive |
| Q46203 | ALLFAATGSALSQALPVGN   | Positive |
| Q46444 | WLLAACLGSAFAQTGPAA    | Positive |
| Q47223 | VVLSALSLSSTAALADTTPT  | Positive |
| Q47459 | VSFVAIMAVASSAMAAETMN  | Positive |
| Q47706 | VICLTAASGLTSAYAAQLAD  | Positive |
| Q47898 | NPLEAKNLLDTSEPKTNNKP  | Positive |
| Q47910 | VITAMCCFFSFAVLASEKLE  | Positive |
| Q47952 | AITLCILGYAHTVYAESNMQ  | Positive |
| Q48245 | LVGALVSITPQQSHAAFFT   | Positive |
| Q4LCS8 | SVIVILFSLIGSIHGADVPG  | Positive |

|        |                      |          |
|--------|----------------------|----------|
| Q4LCS9 | SIIVILFSLIGSIHGADVPG | Positive |
| Q4PRD1 | FGCLVVFLSLSGTEAVLDCP | Positive |
| Q4PRD2 | GLLVVFLSLSGTGAGLDCPP | Positive |
| Q4TUA4 | VFFSLALLLMTGVESVRDGY | Positive |
| Q4V4I9 | WTLVVLVALFALVTGSCLEY | Positive |
| Q4VYA5 | TVIASLVAAPAMALAAGNNI | Positive |
| Q4W1I8 | FMLLISVNYFMSCNAQLSTT | Positive |
| Q4W6G0 | AVAVLLSLAGTPALAADIPA | Positive |
| Q4WBS1 | PLPSVALLSAIGAVAAQVGP | Positive |
| Q4WZ11 | LACLLALAGLQAALADPATC | Positive |
| Q50833 | GSAMVASALATGVFAVEKIG | Positive |
| Q51372 | SALAAGLCLAQAALAADPGA | Positive |
| Q51485 | LFALGALGLGSAAHAAEAFS | Positive |
| Q51705 | TAGVATVAGSGAALAASGDG | Positive |
| Q52085 | ITLFVLLASVSVAMSATCLT | Positive |
| Q52VH2 | LTALIVSIAATASLAGPRAR | Positive |
| Q53599 | IASTGANLDTNEASAAAKQI | Positive |
| Q53B47 | TFLVVTIVCLDLGYTLICHR | Positive |
| Q53B52 | TFLVVTIVCLDLGYTLICHQ | Positive |
| Q53B53 | TLVVVTILCLDLGYTTKCYI | Positive |
| Q53B58 | TLVVVTIVCLDLGYTTKCYV | Positive |
| Q53B59 | TLVVMTIVCLDLGYSLICFI | Positive |
| Q53NL5 | AAALLLLAAPPATADDPGL  | Positive |
| Q540U1 | SAVCLLFTLNHSANALVSSP | Positive |
| Q55025 | ASLVASIGIATVGFAATGVT | Positive |
| Q556R7 | IISSIILSIVIFVSGECAID | Positive |
| Q55P57 | KLFFLSCSFVSLVSSEKTDE | Positive |
| Q56EB0 | FGLLVVFLSLSGTAADCPPD | Positive |
| Q56EB1 | FGLLVVFLSLSGTAADCPSD | Positive |
| Q56S59 | IFLLAALIATPAAFAILVPT | Positive |
| Q56TT9 | VVICFALLLMTGVESGRDAY | Positive |
| Q57449 | MTALALGLFAMQANAKFKVV | Positive |
| Q57483 | ALALGIALASGYASAEKIA  | Positive |
| Q58232 | GGAMVATALASGVAAEVTTS | Positive |
| Q588Z1 | AFGSVVHASGTVAETAPQSG | Positive |
| Q588Z2 | CLAMVAATLSSTAQAKSEWA | Positive |
| Q589G4 | LLVLSISAILQVSHSVSFCL | Positive |
| Q58AD3 | MVGAFIAAVSLSAAAVDMSN | Positive |
| Q59289 | IVFAVIALSSGNILAQSSSI | Positive |
| Q59478 | VMVASLCLFSVPSRAAVPAP | Positive |
| Q59544 | SALALALSLNSVADAKVYMP | Positive |
| Q59639 | IIVSSLLALSATATAGSFND | Positive |
| Q59XX2 | APLAHQHHQHKEEKRAVHV  | Positive |
| Q59Y31 | FAAASALFAATTTLAQDVAC | Positive |
| Q5AMT2 | KFLTTLATVLTVAAMGDLA  | Positive |
| Q5D231 | FVVVICLVIMAITFAEKCGD | Positive |

|        |                       |          |
|--------|-----------------------|----------|
| Q5D710 | TVVVLLGVIVPPCMAGQALN  | Positive |
| Q5DT21 | AIVLLLALTLATMFSIECAK  | Positive |
| Q5DW47 | LILFILSLTITIVMCQTFTY  | Positive |
| Q5ECE3 | KFFGLFLAILASTAADVVID  | Positive |
| Q5EPH2 | FAVVFFAMVLASSQANECVS  | Positive |
| Q5F0I3 | VVAILLYFGFHIAECDINFS  | Positive |
| Q5G8A6 | LALLFLGMVTLASCGLREK   | Positive |
| Q5GQ85 | ALIILLVACLSVVSADDCSG  | Positive |
| Q5HEA4 | GLGIVAGNAGHEAHASEADL  | Positive |
| Q5I2B2 | VIVMMAFMMVDPSMGAGECV  | Positive |
| Q5JIZ5 | LALFLVGLMAGSVLAAPQKP  | Positive |
| Q5JNJ5 | MAVLGLVAVFSSSEAYVFYA  | Positive |
| Q5K0E0 | LLTLICSMSIFGNGQVQTN   | Positive |
| Q5KQS1 | VALVLLGQIIGSTLSSQVRG  | Positive |
| Q5KSB7 | TILVLFLSCAALASAECCSR  | Positive |
| Q5MJP5 | IPLLFLFIYFECDGKFIRH   | Positive |
| Q5NAT0 | LVVLVFAAMAQVARGGGGGH  | Positive |
| Q5SME3 | RTLMAFLLLGGGLALAQADGA | Positive |
| Q5U9S1 | SLPVLLLCVVTASYSEIKTC  | Positive |
| Q5W280 | AQIVVLLLVIASHGAVITG   | Positive |
| Q5XM24 | LLLLLLLSLVASIFSTPLDD  | Positive |
| Q60477 | VVFLITMLLPCVLTNGKDPA  | Positive |
| Q60557 | WVGLVLLMKPNDGTAYKLVC  | Positive |
| Q60675 | TAGILLLLLLTLEGSQTQR   | Positive |
| Q60736 | FQMTLATVLMAPVLGDCGPP  | Positive |
| Q60994 | LLQALLFLLILPSHAEDDVT  | Positive |
| Q61001 | PLLLLLAGLALVGEARTPGG  | Positive |
| Q61247 | SCLQGPCFTFSPVSAVDLPG  | Positive |
| Q61400 | LLTASLLTYWSPATTAQVTV  | Positive |
| Q61508 | SRAALILACLALASAASEGA  | Positive |
| Q61789 | TLLLLLLLRMSPSWSVVGQD  | Positive |
| Q62598 | TKIIYICIWATAWAIPVPQ   | Positive |
| Q62703 | GLLLLLLYAAVAGASKAEE   | Positive |
| Q62718 | SLRLLFLVPTGVPVRSGDAT  | Positive |
| Q62813 | LVLLRLLCLLPTGLPVRSVD  | Positive |
| Q62867 | AWVLLLCGLASPLSGSYER   | Positive |
| Q62894 | RSSALILACLALASAASEGA  | Positive |
| Q63010 | RSLFLVSLATCVVCGNPSSP  | Positive |
| Q63041 | VFLLLLLLLPRDATAATGKP  | Positive |
| Q63415 | WRWLLLLALPAVCSALPPPR  | Positive |
| Q63617 | LVAVLLADLLALSDTLAVMS  | Positive |
| Q64277 | LWLWLWLSLLTVLLGARARW  | Positive |
| Q64424 | FVWTTGLLLLATARGNEVCY  | Positive |
| Q64610 | ISLFTFAISVNICLGFTASR  | Positive |
| Q64HC7 | ALFSFFVLCVALATAGHLGR  | Positive |
| Q653V7 | FLLALFLAAPWGVDCGYNVA  | Positive |



|        |                       |          |
|--------|-----------------------|----------|
| Q696W1 | FGLLAVFLSLSGTGAGLDCP  | Positive |
| Q69CK0 | TLVVVTIVCLDLGYTRKCLN  | Positive |
| Q6ASY2 | CLLVVGLAAVAGVDGATASS  | Positive |
| Q6E0U4 | LACLLALCLGSGEAGPLQS   | Positive |
| Q6EER2 | RALWIVAVLLVGVEGNLLQF  | Positive |
| Q6EER4 | RTLWIVAVLLVGVEGNLLQF  | Positive |
| Q6EH50 | TISVWLILAPTSTWAVNTII  | Positive |
| Q6F3I7 | LFALMTVATALPAHAEKLT   | Positive |
| Q6F495 | TILVTFAAVASLGMADSVLL  | Positive |
| Q6F4C6 | RSLLVLLALAACASAQYFFR  | Positive |
| Q6GU94 | LALILCLYAMTTVEGACQFW  | Positive |
| Q6H3C7 | RTLWILAVLLVGVEGHLLQF  | Positive |
| Q6H3C8 | RALWIMAVLLLGVEGHLMQF  | Positive |
| Q6H3D0 | RTLWIMAVLQVGVEGHLMQF  | Positive |
| Q6H3D2 | RTLWIMAVLLVGVEGGVIEL  | Positive |
| Q6H3D3 | RTLWIMAVLLLGVEGSVIEL  | Positive |
| Q6H3D5 | RTLWIMAVLLVVVEGSLVQL  | Positive |
| Q6H3D6 | RTLWIMAVLLLGVEGHLLQL  | Positive |
| Q6H3D7 | RTLLIMAVLLLGVEGSLLQL  | Positive |
| Q6IV20 | MALLFLLQAVPGLGLPRDT   | Positive |
| Q6IWZ0 | AFLLLACALVISVHADGVCR  | Positive |
| Q6IY74 | LQGLLLWLLLTGTGGAQAPRG | Positive |
| Q6JK69 | RTLWIMAVLLVGVEGSLVEL  | Positive |
| Q6KF81 | VAATAAWPYFGGFQRDEPDG  | Positive |
| Q6KF82 | ASPYSGSHDFSQFQRDEPDG  | Positive |
| Q6PSU2 | LVALALFLAAHASARQQWE   | Positive |
| Q6QD51 | LAMWLVCGSASQSSALDSDG  | Positive |
| Q6QX33 | FGLLVVFLSLSGAKGNCPQ   | Positive |
| Q6RG02 | STLLFVLAFAVAGGLAAPWGA | Positive |
| Q6RUF5 | ILVFFVGNGMEVYALEESR   | Positive |
| Q6T6C1 | LALFLGMTAFLAVQADHHHD  | Positive |
| Q6T6C2 | SILLCFGICIAVINAGCFED  | Positive |
| Q6T6S5 | LGLLTLWAELTPVSGKKRPD  | Positive |
| Q6T6T4 | CLLLLLLLPSALPALKVGGL  | Positive |
| Q6T6T5 | LGLLTLWAELTPVSGKNRPE  | Positive |
| Q6TPK4 | LLALSAAVVGGRKLVAAGG   | Positive |
| Q6UW01 | LPLVLVLLALGAGWAQEGSE  | Positive |
| Q6UW10 | LPLVLLLTLLGSSHGTGPGM  | Positive |
| Q6UW15 | WMLLSCLILLCQVQGEETQK  | Positive |
| Q6UW32 | VFAIFCISRLLCSHGAPVAP  | Positive |
| Q6UWE3 | LVAGVLSGAVLPLWSALPQY  | Positive |
| Q6UWK7 | LCILLLCFSIFSTEGKRRPA  | Positive |
| Q6UWM5 | SCLWILGLCLVATTSSKIPS  | Positive |
| Q6UWN5 | LCLFGAALCLTGSQALQCYS  | Positive |
| Q6UWN8 | LLSLALFCFLTGVFSQGGQV  | Positive |
| Q6UWY5 | LFLAAFLPPPQCTQDPAMVH  | Positive |

|        |                       |          |
|--------|-----------------------|----------|
| Q6UX39 | RSTILLFCLLGSTRSLPQLK  | Positive |
| Q6UX52 | LFCLAVLAASSFSKAREEEI  | Positive |
| Q6UXB1 | LVCWITVFLQCSKGTTDAP   | Positive |
| Q6UXB2 | SLLLLLPLMLMSMVSSSLNP  | Positive |
| Q6UXH1 | GLLPLLLLLPPAPEAAKKPT  | Positive |
| Q6WN34 | LLGLALLWFPLDSHARARPD  | Positive |
| Q6X4U4 | YLLPLACILMKSCLAFKNDA  | Positive |
| Q6X5T3 | SGLLVVFLSLSGTGADFQCP  | Positive |
| Q6XE38 | LLMVSLALCCYQAHALVCPA  | Positive |
| Q6YDN9 | ALVALFLMASSTVMAIPPRK  | Positive |
| Q6YZY5 | LLATLLAMASWQGMASDPSP  | Positive |
| Q6Z232 | PTPAPKAQPPVATPPTRPPA  | Positive |
| Q6ZBZ2 | PVLLSFLLLPFSSMALTQDF  | Positive |
| Q70DJ5 | SIATIFLLLLNKAHSLGSL   | Positive |
| Q70LM3 | LAFVSLAAVTSAAPSKTTCS  | Positive |
| Q70YI1 | VTAAVMGLAMSTAMAATDAT  | Positive |
| Q71DJ5 | VAVLTSLTIFSALTQSHLLH  | Positive |
| Q71QE8 | RTFWIVALLLVGVEGNLLQF  | Positive |
| Q727P6 | AVSLLMAGSALVGNAADA    | Positive |
| Q75WF2 | ALTVLTAVMVGTSSEAVSCMD | Positive |
| Q765P3 | LVALVVAIELTLVFAGCPTI  | Positive |
| Q765P4 | FLLTEIFFYISYAEATRSGP  | Positive |
| Q76BW5 | AAVAVSWLAASSAAAAGFYE  | Positive |
| Q76CA2 | VVVVALISQSRPAESAGGTI  | Positive |
| Q76FP5 | LPSLALALFSQRARADTTLT  | Positive |
| Q76IQ4 | LMLCTLALWAKSVSAGSSFL  | Positive |
| Q79F14 | LILSVLAAPPSGAKAESVHN  | Positive |
| Q7BS42 | GIPAICLCYSQISQAGIVRS  | Positive |
| Q7BSW5 | ALCFLGLLQSSYSFASQMDI  | Positive |
| Q7JZV0 | KFFIAFACLLAVALANEDAN  | Positive |
| Q7L513 | YLSLGVLWVAQMLLAASFET  | Positive |
| Q7M3V1 | VIFIMALFIAVESSPIFSFD  | Positive |
| Q7M413 | KSLIVFACLVAYAAADCTSL  | Positive |
| Q7M418 | IALFVLMGLMAAASASSCCS  | Positive |
| Q7M419 | KVLHIFACLVVMASAVCNRL  | Positive |
| Q7M438 | LLIASTAQSTVTIYESSKPG  | Positive |
| Q7M4T0 | PPALTLLLTPGLVAAAIQPQ  | Positive |
| Q7MSJ8 | MCVSTLSIAATHAVAMEGMQ  | Positive |
| Q7Q7R8 | MIFALIADLSTLVAARPQDS  | Positive |
| Q7SZI7 | LTALFFCGIASNPLFQPSL   | Positive |
| Q7SZN0 | MFLGWSGLKYYQVNAAQLRE  | Positive |
| Q7T045 | FGLLVVFLSLSGTGADFDCP  | Positive |
| Q7T1K6 | FSLLCFAAVLQQSFGNVDFN  | Positive |
| Q7T2I5 | TLVVVTIVCLDLGYTRICFN  | Positive |
| Q7T2Q0 | LVVFLSLSGIGAGLCCPLGW  | Positive |
| Q7T2Q6 | LGLLTLLAELTPVSSRKRHP  | Positive |

|        |                       |          |
|--------|-----------------------|----------|
| Q7T2R1 | RTLWIMAVCLIGVEGNFFQF  | Positive |
| Q7TMF5 | DLGLFLAGLLTVKGLLQDRD  | Positive |
| Q7TQN3 | LLLLLLEAPLRGLALPPIR   | Positive |
| Q7YT16 | IVLVAALALAAPAMGKTFTTR | Positive |
| Q7YXD3 | VMISLALLFMTGVESLKDGY  | Positive |
| Q7YZS9 | LLVIACLNLFQVVLTSRCFP  | Positive |
| Q7Z0H4 | VILVLFSMLIWTAYGTPYPV  | Positive |
| Q7Z0T3 | RVFLAVSLLCALANAYPQYQ  | Positive |
| Q7Z1K3 | LAALLLAASICLGDAADRTEC | Positive |
| Q7Z5L0 | LPLLLLLRATGFTCAQTDGR  | Positive |
| Q7ZT98 | FTLLSLAAVLQQSFGNVDFN  | Positive |
| Q7ZTA6 | RTLWILAVLLLGVEGNLVQF  | Positive |
| Q7ZZN8 | IVLLSLAAVLQQSSGTVDFA  | Positive |
| Q800A0 | KQFLVVLILSFVHGIIRVP   | Positive |
| Q800Y2 | LQFLALSAAIALCVCYESHE  | Positive |
| Q805A2 | RTLWIMAVLLVGVEGNLLQF  | Positive |
| Q805F3 | RQILVLLLFATLVYGLIRVP  | Positive |
| Q82S91 | AASVTALFLSMQVYASGHTA  | Positive |
| Q83EK8 | IGVSALCCLASAAAFAGGPD  | Positive |
| Q84UV8 | FISFLFLSSVFLARSGEVDD  | Positive |
| Q84V39 | VPDQPVPPTPTSPVPTSSSPV | Positive |
| Q84ZX5 | AVLLIFIVAIGEMEAAGSKL  | Positive |
| Q867F4 | LLTLICSMISIFGNCQIETN  | Positive |
| Q867W1 | VVLVVLAVLSDPVSAGYRKP  | Positive |
| Q868Z9 | LVAFIVLASIHDSQSRFPGL  | Positive |
| Q86IV5 | LILALFLVNSAVVSSLDCS   | Positive |
| Q86LE5 | VSALLVVALVASTSAHHQEL  | Positive |
| Q86QT3 | LIMIIASLMIMGVEMDRDSC  | Positive |
| Q86SC0 | CAALYSNFFDCKAVADAELP  | Positive |
| Q86SD9 | VMISLALLFMIGVESARDGY  | Positive |
| Q86SE0 | TISLALLLMTGVASGVRDGY  | Positive |
| Q86SE1 | VMISLALLLMIGVESVRDGY  | Positive |
| Q86WA6 | GIHVPRAGPAAAFGTSVTSA  | Positive |
| Q86Y78 | AWLLLLSLLADCLKAAQSRD  | Positive |
| Q875I9 | LSEILTVALVTGATAYNLPN  | Positive |
| Q8AV97 | FGLLVVILSLSGTGADFDCI  | Positive |
| Q8AV98 | FGFLVVATSLSGTEAGFCCP  | Positive |
| Q8AXY1 | RTLWIMAVLLVGVEGSLWQF  | Positive |
| Q8AYA2 | LLSGLLLLGTFLANGDETDP  | Positive |
| Q8BHN3 | LVLAYLGVCLGITLAVDRSN  | Positive |
| Q8BHP7 | VLLLLVLLRAGPVWPD SKVF | Positive |
| Q8BK48 | AVACGVLLLVLHVQQQDSAS  | Positive |
| Q8C1Q4 | LCALCCGLLAASAHAGYSED  | Positive |
| Q8CEK3 | LFILTLVLLPYSVFSVNIFA  | Positive |
| Q8DJE2 | ILLGWTIAPATALAAAGVD   | Positive |
| Q8FDW4 | VATMLSLAVAGTVNAANIDI  | Positive |

|        |                       |          |
|--------|-----------------------|----------|
| Q8GFE2 | SISLAFSVLALPIFAAVDTT  | Positive |
| Q8GPG1 | TAAFLATSPALPLSADSLNA  | Positive |
| Q8GR64 | SLLMLCLATPLAALAAGVDE  | Positive |
| Q8GT41 | IFFFNLLLLLQAVISADIVQ  | Positive |
| Q8GTB6 | IIFFFLSFHIQISIANPREN  | Positive |
| Q8GTM0 | AILAMMLFVAYEVQARECKT  | Positive |
| Q8H6Q0 | AILALMLFAAYETEAGTCKA  | Positive |
| Q8H6Q1 | AILALMLFAAYDAEAATCKA  | Positive |
| Q8HY17 | AVWVLAGELWLRTEARASPY  | Positive |
| Q8I034 | WALWVLA AVIKGPAADAPVR | Positive |
| Q8I0L5 | LLTLLICSMKFGNCQVETN   | Positive |
| Q8I7X1 | IVSLLCLTLHQRVWAYQVIG  | Positive |
| Q8I817 | LPLLLLTCLVA AVQSTGSQG | Positive |
| Q8IFJ8 | KWCVLAMCLLVAVGADKCPR  | Positive |
| Q8J0D2 | KALTALSILASLAVAKEHYE  | Positive |
| Q8J0I9 | AISVAMPSEPAHSPRAAGAQ  | Positive |
| Q8J0K5 | VSFDIRDENITLARRAEAIN  | Positive |
| Q8JFY4 | LLVCVLALWMDSVQAGSSFL  | Positive |
| Q8JGT6 | FGLLVVFISLSGTEAGFCCP  | Positive |
| Q8JGT9 | FILLSLAAVLRQSFGNVDFN  | Positive |
| Q8JI39 | IVLPILAAVLQSSGNVDFD   | Positive |
| Q8JIY9 | RTLWIMAVLLVGVEGHLWQF  | Positive |
| Q8K0D2 | RVLLLIALVGKSVIGLSLMS  | Positive |
| Q8KDM7 | ALVLMTAMTAKPANA EVNYQ | Positive |
| Q8KIL1 | LACSPLIAHAQFAPAGAGGE  | Positive |
| Q8L5C6 | LSVAAALFLTPTALAAGGKT  | Positive |
| Q8L5J1 | ILHFPNEFSKPTRAFSNNN   | Positive |
| Q8LG54 | EAFFIVALFTTSCLAQAPAP  | Positive |
| Q8MI35 | ALLLLLLLLLPLPARAWYKHT | Positive |
| Q8MJV4 | AALALCLLLASPGLAWYKPT  | Positive |
| Q8MLZ7 | LALSLAVLAQFKVSAAPNLV  | Positive |
| Q8MM24 | FYILGLLSVTSLTHAASNLI  | Positive |
| Q8MMG9 | QVLVFCALTGSLASAGSIGH  | Positive |
| Q8MMH3 | LILPLLAQIFACAFGDAVNE  | Positive |
| Q8MMJ7 | LVALVLFQMFAQSDAILGKI  | Positive |
| Q8MP00 | ALVALLVCTLLIDLSSFTDA  | Positive |
| Q8MP06 | MLVLSLLVAAGISQASSASR  | Positive |
| Q8MTX2 | LVALVLFQMFAQSEAI FGAI | Positive |
| Q8MVA6 | VTLLVLECVYFVMSEPDPGQ  | Positive |
| Q8N474 | VLLALGAALLAVGSASEYDY  | Positive |
| Q8N4F0 | RLGLLLALLLPVVGASTPGT  | Positive |
| Q8N6C8 | ICLGLSLDPRTHVQAGPLPK  | Positive |
| Q8N6Q3 | LALLGFILPLPGVQALLCQF  | Positive |
| Q8NBK3 | VLLLLLLSLLCGAAGSQEAG  | Positive |
| Q8NBL1 | LRLWLLLFLLP SAQGRQKES | Positive |
| Q8NBM8 | LAALTALLAAAAAGGDAPPG  | Positive |

|        |                        |          |
|--------|------------------------|----------|
| Q8NBP7 | LLLLLLLLGPAGARAQED     | Positive |
| Q8NCC3 | FLLLLMLLADPALPAGRHP    | Positive |
| Q8NHP8 | LALLVGPFLSGLAGAIPAPG   | Positive |
| Q8NJ73 | VLALAPAAAFGQAALWGQCG   | Positive |
| Q8NKX2 | ITVILISTISPIIKSDSKKD   | Positive |
| Q8QG87 | RTLWIMAVLLVGVEGNLWQF   | Positive |
| Q8QGR0 | TLVVVTIVCLDLGYTLTCVK   | Positive |
| Q8RJP2 | PLLTILFVLPLTATGAVKLT   | Positive |
| Q8RLX0 | LVLLTAMTSKPAHAADVNYQA  | Positive |
| Q8RS40 | ISIATLGACAFSAHALDGKL   | Positive |
| Q8RUW5 | IKFLLLLVLYHHVDSASIVK   | Positive |
| Q8RVH5 | ALSLSFSFLFLLSDSVPIPQ   | Positive |
| Q8SPQ0 | GTGFVVLVLLQSCAAYKLIC   | Positive |
| Q8SXL2 | VVICTVVLAAQQSQAKKGCQ   | Positive |
| Q8T0W0 | IVLIVVVVAANLCEASDCGP   | Positive |
| Q8T0W2 | ACALLVVATAHAATAIVNPE   | Positive |
| Q8T0W5 | IVLVVVVVATNLSEANIFDV   | Positive |
| Q8T0W8 | FLLIVACAMIAATTEAAVRIG  | Positive |
| Q8T0Y7 | LMASALCVSTLLVTAMPFDL   | Positive |
| Q8T113 | WKTVLITIFAAGVLADDFSQ   | Positive |
| Q8T1G4 | FLLVLAVIIGFAYGYSCPK    | Positive |
| Q8T635 | ILLVLTAVLIAVGSCGRLEP   | Positive |
| Q8T9R8 | LVVLVLCLSATQTEARGFRK   | Positive |
| Q8TAL6 | LKFFCMSFFCHLCQGYFDGP   | Positive |
| Q8TD06 | LGLCLLLVTVSSNLAIKIK    | Positive |
| Q8UUG0 | LVLSMVVLMAEPGD AFFHHI  | Positive |
| Q8UVU7 | RTLLIVAVLLVGVEGSVYEL   | Positive |
| Q8UVZ7 | RTFWIVAMLLVGVEGSLVEL   | Positive |
| Q8VCS0 | WIVLGLLLWPEPGAASSLPL   | Positive |
| Q8VCT4 | YPLIWLSLA ACTAWGY PSSP | Positive |
| Q8VSL2 | SVAALSLSSAWPALSATVSA   | Positive |
| Q8W257 | LHIFLIAYLACTAL THDFDD  | Positive |
| Q8WMP9 | GLLFLLMLADPAFPAGSRPP   | Positive |
| Q8WP90 | VLHIFIFALVAFASASRDSA   | Positive |
| Q8WPD0 | FRALCFVLLVGFAAACQPDC   | Positive |
| Q8WPJ2 | LTALAVLFASTGCQARLSVS   | Positive |
| Q8WQK0 | FLIVLCGLIFVTVDAMIDAP   | Positive |
| Q8WRY4 | LMITACLILIGTVWAEDGYL   | Positive |
| Q8WUJ3 | TISWLTLCFPGATSTVAAG    | Positive |
| Q8WWA0 | LSFLLFLIATTRGWSTDEAN   | Positive |
| Q8WXF3 | AVWVLTGELWPGA EARAAPY  | Positive |
| Q8WZI8 | VASLLSLALPGAALAATDPF   | Positive |
| Q8X150 | RSRILAIVFAARHVAALPLA   | Positive |
| Q90121 | YSFLFAAAML PVVHSLGINC  | Positive |
| Q90611 | KVLLIQVYLFNKTLAAPSPI   | Positive |
| Q90W22 | GVVLFCLLWTEGAQAGLTFL   | Positive |

|        |                        |          |
|--------|------------------------|----------|
| Q90W39 | RTLWIVAVLLLGV EGNLLQF  | Positive |
| Q90WA0 | LGLLTLWEVLTPVSSKDRPE   | Positive |
| Q90WA1 | LGLLTLWEVLTPVSSKDRPD   | Positive |
| Q90WJ8 | LCVAVLSSMALVSHGAVLGL   | Positive |
| Q90WJ9 | GVVLLLMLAVLGIRAAPAPE   | Positive |
| Q90Y77 | RTLWIMAVLLVGVEGHLLQF   | Positive |
| Q90ZY0 | LMIAIFVLMVEPGECGWGSF   | Positive |
| Q91055 | SLYLCLAAMLHQSEGEASPK   | Positive |
| Q91XA9 | VTGLALLLNAQLGSAYNLIC   | Positive |
| Q924B5 | LVFLLIASHWTLVQNIYCEV   | Positive |
| Q92563 | RLVLPLLLLAAAALAEGBAK   | Positive |
| Q92583 | LVTLLL GASLQHIHAARGTN  | Positive |
| Q92765 | ALAALCLLRVPGARAAACEP   | Positive |
| Q934G3 | LTAVASLVSVNALAVSIDY    | Positive |
| Q939U1 | ALVCGGAFSGAAVSAGPDDP   | Positive |
| Q93LJ4 | AIFLC SLLMCSTTFADSVTS  | Positive |
| Q93MW7 | ALFGASAAVSAPRIQATDYV   | Positive |
| Q942A7 | SFAAVILSLAAPLLAGDPDM   | Positive |
| Q949Y3 | LLYRGESGITSSFIRSEWPA   | Positive |
| Q94EG3 | ILFLLAISIDRYCFAADED M  | Positive |
| Q95121 | LLLWTGALLGFGRCQNAGQE   | Positive |
| Q95JC9 | LPILLSVALLALSSARSPFF   | Positive |
| Q95M17 | LTGLAFL LNAQLGSAYQLVC  | Positive |
| Q95NJ8 | LISVLIATIVPVNEAQTQCQ   | Positive |
| Q95NK7 | LILAVCSMAIWTVNGTPFAI   | Positive |
| Q95P08 | LALATL FVLGTVIRADQCPP  | Positive |
| Q95P90 | FIAFIAVIACSMVYGDSLSP   | Positive |
| Q95UE8 | FVCTLVLALAHHAFAAGV CDS | Positive |
| Q95VF0 | LFVVVCLSLYQAVEPSQDVV   | Positive |
| Q95VP2 | AVCVVLVAGSHLVAGTAEVM   | Positive |
| Q95VP3 | LVLTLCLTG VWQVESSADV M | Positive |
| Q96318 | VATFGVLLVLNGCLARQSLG   | Positive |
| Q965E2 | KTLVVLAITLAVVSAGKV KF  | Positive |
| Q966V2 | FISGAIALFALTGSCSESTN   | Positive |
| Q968Z6 | IYLFILTFYKTIVLTQTPST   | Positive |
| Q969H8 | AALLLGAVALRPAEAVSEPT   | Positive |
| Q969J5 | FLGFLISFFLTGVAGTQSTH   | Positive |
| Q96DR8 | VLVLLGV SIFLVSAQNPTTA  | Positive |
| Q96HE7 | FGLLGAVWLLSSGHGEEQPP   | Positive |
| Q96HF1 | LLFLASHCCLGSARGLFLFG   | Positive |
| Q96I82 | LLLLLVLT PPTGARPSPG    | Positive |
| Q96PD4 | LLSILGLAFLSEAAARKIPK   | Positive |
| Q96PD5 | WILLG LLLWSDPGTASLPLL  | Positive |
| Q96QR1 | LLGLCVALSCSSAA AFLVGS  | Positive |
| Q96RQ9 | HLLVLVPILLSLVASQDWKA   | Positive |
| Q96S96 | VT AALLLGLMMVVTGDEDEN  | Positive |

|        |                       |          |
|--------|-----------------------|----------|
| Q96TU3 | SKALSVFMLMGITYAFNYDQ  | Positive |
| Q96X54 | SALSLLLCLVQHAHGVSLKV  | Positive |
| Q98967 | IVVPLLAVAFTVANAGLVGG  | Positive |
| Q99003 | FLAVFILVCCNISQAAVSFI  | Positive |
| Q99013 | GQLIFLFWTMRITEARPDPA  | Positive |
| Q99217 | GTWILFACLLGAAFAMPLPP  | Positive |
| Q99289 | TITLLTALLPLASAVAEET   | Positive |
| Q99372 | VLLILLNLLHPAQPGGVP    | Positive |
| Q99519 | AIFLLLSLAASWSKAENDFG  | Positive |
| Q99538 | WKVAVFLSVALGIGAVPIDD  | Positive |
| Q99616 | KVSAVLLCLLLMTAAFNPPG  | Positive |
| Q99935 | LGLLALISCFTPSESQRFSR  | Positive |
| Q99944 | LGGFSFLLLLIPGEGAKGGS  | Positive |
| Q99969 | IPLALWLGA VGVGVAELTEA | Positive |
| Q99972 | VQLLLLACLVDVGARTAQ    | Positive |
| Q99MG7 | VKFLLLALALGVSCAHYQNL  | Positive |
| Q99ML8 | VFVVLMLDRILFVPGTPIPT  | Positive |
| Q99PX1 | IATLVSAALSQYAFATDTK   | Positive |
| Q9AQS0 | LMTLWGGWQPDIAHASDEFD  | Positive |
| Q9BJX2 | LILAVCSMAIWTVNGTPFEV  | Positive |
| Q9BKB7 | LLLTLFICSIGWSEARPTDI  | Positive |
| Q9BQB4 | LVCLLVHTAFRVVEGQGWQA  | Positive |
| Q9BX93 | SGFLVLWLSLGGGLAQSDTS  | Positive |
| Q9BXI9 | LLFLLMCEIPMVELTFDRA   | Positive |
| Q9BXJ3 | LPLLLGLLGPAACWALGPTP  | Positive |
| Q9BYZ8 | LLLLLSCLAKTGVLGDIIMR  | Positive |
| Q9BZM5 | LCLPLLLLLSGWSRAGRADP  | Positive |
| Q9BZR6 | LAWVLWLQAWQVAAPCPGAC  | Positive |
| Q9C0Y4 | LFLTALFSAISIAVGNVYQT  | Positive |
| Q9C5S0 | AIAVICIVLIAGVTGQAPTS  | Positive |
| Q9C9H5 | FVLLFSSLLISNGDANPNYK  | Positive |
| Q9D3H2 | AKFLLLALTFGLAHAAMEGP  | Positive |
| Q9DEA1 | FGLLVVFLSLSGTGADCPPD  | Positive |
| Q9DEA2 | FGLLVVFLSLSGTAADCLPG  | Positive |
| Q9EQX0 | SLLLLSMLWMDMAMAGSSFL  | Positive |
| Q9EZE7 | FNLSLYGAFLSASQAAQLNI  | Positive |
| Q9F437 | PAPAPMPAMAPAAKPAMNTP  | Positive |
| Q9F646 | VAVSLTLASAQVFAADCKV   | Positive |
| Q9FRV0 | AVVATVAMAIGTAHGSVSSI  | Positive |
| Q9FRV1 | ALFAVLAMAVTMAVAEQCGS  | Positive |
| Q9FXT4 | SRGARWRSRRARRRAFENGL  | Positive |
| Q9GK12 | LLVWALLALLSLGAAREDPP  | Positive |
| Q9GL30 | LLLLLLAVAVPLSQAGVYYA  | Positive |
| Q9GQV7 | VVLVVCLAWAVYCEDQRPPS  | Positive |
| Q9GSA4 | ITMFLIVITLTSVAAQTFQY  | Positive |
| Q9GU69 | LVGAAILIFVSDAQQAQGDGE | Positive |

|        |                       |          |
|--------|-----------------------|----------|
| Q9GZM7 | GLLLLLPLAGHLALGAQQGR  | Positive |
| Q9GZV9 | VCALCSVCSMSVLRAYPNAS  | Positive |
| Q9GZX6 | SCLLLLALLVQGGAAAPISS  | Positive |
| Q9GZZ8 | TLLFLAAVAGALVYAEDASS  | Positive |
| Q9H1M4 | IIALLFQKPTVTEQLKKCW   | Positive |
| Q9H293 | LQVVAFLAMVMGHTHTYSHWP | Positive |
| Q9H4G1 | LLLLLLGSQILLIYAWHFHE  | Positive |
| Q9HB40 | RWLLLLPLLLGLNAGAVIDW  | Positive |
| Q9HC23 | LLLPPLLLTPRAGDAAVITG  | Positive |
| Q9HE18 | PLVLVLAWLLPVVLAASLTQ  | Positive |
| Q9HGE1 | FDFVPRDNSTALQARQVTPN  | Positive |
| Q9HU05 | GLLALLLLQGPLLQAQPLSP  | Positive |
| Q9HZQ8 | ALGALALSVSAASLAAPSEA  | Positive |
| Q9I194 | GLAGMLLGSMMMPVQADMPRP | Positive |
| Q9I589 | LPLTLALFLPQAAHAHGSME  | Positive |
| Q9I596 | LLSCVLLALSMPARADDLPY  | Positive |
| Q9I840 | FGLLVVFLSLSGTGADCPSG  | Positive |
| Q9IAM1 | FGLLVVFLSLSGTAADCSSG  | Positive |
| Q9JJS8 | IVLGLLWSLVATLLGSKWPE  | Positive |
| Q9JLA3 | LIALALLCLFSLAEANSKAI  | Positive |
| Q9JMI7 | LIFLLIASRWTLVQNTYCQV  | Positive |
| Q9KK91 | VIGAVALASTGLMAKEVGV   | Positive |
| Q9L7P2 | MAILSSMAWATGASAALVPP  | Positive |
| Q9LAB5 | TVVENSAPTSKQAQAAITPY  | Positive |
| Q9LAP7 | SIAISFAVLGVQAQAETLEL  | Positive |
| Q9LCB9 | ISVATLGACAFQAHALDGKL  | Positive |
| Q9LD79 | AATLTISSHMQEAGAVKFDI  | Positive |
| Q9LJD9 | MVAIVAFSAVGNVAAQTEAP  | Positive |
| Q9LLT1 | IAFLVFLCAIVSCCSDNPID  | Positive |
| Q9LRC8 | CVLCFSLIFICGVIGEETTI  | Positive |
| Q9LVC0 | VAVIAFSTVHQTVAAVDAPA  | Positive |
| Q9LXD6 | FSVSTLFLCFIVCISEQSNN  | Positive |
| Q9LYF6 | IVVLMMVIIISVVASAQSEAP | Positive |
| Q9M069 | YFLLIFLSHFPSSHAEPFIG  | Positive |
| Q9M0S4 | VVLLFLALIASSAIAQAPGP  | Positive |
| Q9M6E9 | TKNKLHGNAYYQAQFQDPIK  | Positive |
| Q9N2D2 | RGFVVLLAVFALSQASGIVR  | Positive |
| Q9N2D3 | KWMVVAFICLQLLEATVVKV  | Positive |
| Q9N2I2 | LFLCLVLLGPRMATLRRSQK  | Positive |
| Q9NAX4 | VLLLLVCLVFAYVNASYDAC  | Positive |
| Q9NBG9 | LVALIICSISICTEAFGLID  | Positive |
| Q9NBW2 | LLLVIFSLMLIGVLTKKSGY  | Positive |
| Q9NBW4 | AVLLLACFCSVAFGDCENT   | Positive |
| Q9NII5 | LLLAIVICSIGWTEAQFTNV  | Positive |
| Q9NII7 | LITLFICSMIIGHGVGINV   | Positive |
| Q9NJP7 | MNVMMAIISDPVVEAVGCEE  | Positive |



|        |                       |          |
|--------|-----------------------|----------|
| Q9NL38 | LHLTALLVLIPLCHCASMHR  | Positive |
| Q9NL39 | ALVLLGICHLSRPVAAAYQRC | Positive |
| Q9NRC9 | RILLFLPGLVAVCAVHGIF   | Positive |
| Q9NRR1 | PVLLLLLAGAPAAARPTPTC  | Positive |
| Q9NSA1 | WVSVLAGLLLGAQAHPIPD   | Positive |
| Q9NTU7 | AVLLVLTLPGLPVWAQNDTE  | Positive |
| Q9NWM8 | LWNAVLTLFVTSLIGALPE   | Positive |
| Q9NYY1 | LLSAAFYLLWTPSTGLKTLN  | Positive |
| Q9P0W0 | WLEILMGIFIAGTSLDCNL   | Positive |
| Q9P121 | LRLFLVPTGVPVRSGDATF   | Positive |
| Q9PTA1 | CVSLLGAANIPPHPLNLNF   | Positive |
| Q9PTT2 | VIFFCLFYGCHVAGATGKTI  | Positive |
| Q9PUB7 | TLVVVTIVCLDFGYTIVCYK  | Positive |
| Q9PVW8 | LLSLLIATPGLLVSGANMIT  | Positive |
| Q9PW19 | TLVVVTIICLDLGYTEMCMN  | Positive |
| Q9PW68 | FTLSLLICLGTADAYPSKP   | Positive |
| Q9PWI3 | LFCCFLGTFLATGMCIDCEH  | Positive |
| Q9PWI4 | QIICLLFIFVARGSCRSCEI  | Positive |
| Q9QXX3 | LLLLLLLLGPGPGFSEATTR  | Positive |
| Q9RQB9 | IHAVFGVLFSahaladvTNA  | Positive |
| Q9RU24 | VMMLALALGASTSLAAPFVY  | Positive |
| Q9S1E5 | LAGSLVAIVSMGLLASNINE  | Positive |
| Q9S1G7 | SLAAAAAWATGAAAAADGAP  | Positive |
| Q9S3R8 | LLALAGLACTFSATAQEATT  | Positive |
| Q9S3R9 | LMLTLVGAIALNASAQENTV  | Positive |
| Q9S7Y7 | SLLALILCFSPTQSYKTIG   | Positive |
| Q9S8P4 | VLLLVLATATTATAADADA   | Positive |
| Q9SJY7 | QALIFLGFLATSCLAQAPAP  | Positive |
| Q9SLP4 | LFFALLSPLLPLTSALVFRE  | Positive |
| Q9SLY8 | VALALALASVAAVAGEVFFQ  | Positive |
| Q9SR37 | GLLLLLTIVASpanadGPVC  | Positive |
| Q9STQ3 | LVAAMAFSAVQQAaAVEAPA  | Positive |
| Q9SU40 | ILLVFFVNISFCFAADPYS   | Positive |
| Q9SUQ8 | SFFLLVLLFSDTVLSFRKTI  | Positive |
| Q9SW93 | CFLLLAFLIGTASAITCGQ   | Positive |
| Q9TRM8 | GVWLLLSQLPREIPATDDKK  | Positive |
| Q9TSN6 | FVSLLLVGILFHATQAEQLT  | Positive |
| Q9TT95 | IVLAVLLSLMESPASAPVHR  | Positive |
| Q9TTE1 | LALGLLVAGIRSVHCLPENV  | Positive |
| Q9TVX3 | FFAVIITFSNIQVEGAVCNL  | Positive |
| Q9TW32 | LAIVLVTLWAMPSEAGKDPK  | Positive |
| Q9U3Z3 | LLVIVFLNLVVPTSACRAEG  | Positive |
| Q9U8D2 | FNVVMTITPDMKVEAATCED  | Positive |
| Q9U8W7 | FQLLSFLCVSLLVAGDVHHH  | Positive |
| Q9U8W8 | FVITLIGQKYGLTSSQNKEL  | Positive |
| Q9U8X3 | LIGCLFLMGAMIGDAYSRCQ  | Positive |

|        |                       |          |
|--------|-----------------------|----------|
| Q9U943 | IWFLLLIAISSGGLSAAVGG  | Positive |
| Q9UAC8 | IFLIVCSFVLIGVKADNGYL  | Positive |
| Q9UAC9 | IFLIVSSLLLIGVKTDNGYL  | Positive |
| Q9UAD0 | IALFLTVMFATQTDGCGPCF  | Positive |
| Q9UAH3 | ITALVLLGICHLARPAYHKK  | Positive |
| Q9UBD3 | ALLGICSLTAYIVEGVGSEV  | Positive |
| Q9UBP4 | TLLCLLLAAAVPTAPAPAPT  | Positive |
| Q9UBT3 | AVLLGLSWLCSPLGALVLDF  | Positive |
| Q9UBU3 | SLLLLGMLWDLAMAGSSFL   | Positive |
| Q9UHD0 | LLGTILILCSVDNHGLRRCL  | Positive |
| Q9UK55 | LLLSVLLAQVWLVPGLAPSP  | Positive |
| Q9UKZ9 | PLCLLLAAATQLSRQQSPER  | Positive |
| Q9UVI4 | KFLAAASLLVASTLAVPTSS  | Positive |
| Q9V496 | IGILASVLLTIAVNAENACN  | Positive |
| Q9VG55 | LLIAASCYILVCSHAKSLQG  | Positive |
| Q9VMD9 | LGGITLLLAVAICQGYETYQ  | Positive |
| Q9VYX7 | MAIGLVLLLLAFVSAGKSRQ  | Positive |
| Q9W7J5 | TLVVVTIVCLDLGYTRTCFI  | Positive |
| Q9XD84 | GLIAGLLMPSPALAAAYDN   | Positive |
| Q9XFS7 | VIVCMLVTAPMASEAAISCG  | Positive |
| Q9XIV8 | MVILVLAIQVMTMVLGQGTRV | Positive |
| Q9XSC9 | LGALLFLLGGLGALANICEI  | Positive |
| Q9XSW3 | FPSLHLLLLIVMTASHTETE  | Positive |
| Q9XTN0 | VLALALSSLLTEIAADCDDV  | Positive |
| Q9XY87 | LLISASMLIDGLVNADGYIR  | Positive |
| Q9XYT4 | IIGVCLFIVSQAVLAVPWDS  | Positive |
| Q9XZH0 | ACLLALSASVAAPEPRWKVF  | Positive |
| Q9Y0X9 | LIAMAALLLVGQSEAGGLKK  | Positive |
| Q9Y0Y0 | VLLIGLVLLTGQTEAGGLKK  | Positive |
| Q9Y240 | LGALVVPQLLGFHGHARGAE  | Positive |
| Q9Y251 | LGPLSPGALPRPAQAQDVVD  | Positive |
| Q9Y258 | AVLLASLLSLHLGTATRGSD  | Positive |
| Q9Y2I2 | VTVSSVMQPYPLVWGHYDLC  | Positive |
| Q9Y4X3 | LLLLSLLSPDPTAAFLLP    | Positive |
| Q9Y5C1 | FTIKLLLFIVPLVISSRIDQ  | Positive |
| Q9Y5Q6 | LFLFSVLFAISEVRSKESVR  | Positive |
| Q9YGG9 | VSFGLLVVFLSLSGAEDDS   | Positive |
| Q9YGI4 | TLVVVTIVCLDLGYTLTCLN  | Positive |
| Q9YGJ0 | TLVVVTIVCLDLGYTMQCKT  | Positive |
| Q9YGN4 | FGLLVVFVSLSGTGADCPG   | Positive |
| Q9YGN5 | FGLLVVFVSLSGTGADFFCP  | Positive |
| Q9YGP1 | FGLLVVFVSLSGAKGSCCTN  | Positive |
| Q9YH85 | WAALLVVTVRHRAHAMASLY  | Positive |
| Q9YI92 | FGLLVVFVSLSGTGADCPG   | Positive |
| Q9Z0J8 | AVLLSLCSCLPAGQSVDFPW  | Positive |
| Q9Z0K8 | CAAASFALCVLKASSLDFTL  | Positive |

|        |                      |          |
|--------|----------------------|----------|
| Q9Z0L3 | MLLMVGMLMAPCVGAHALDT | Positive |
| Q9Z0M9 | WWVLLLYVHVILARATSAPQ | Positive |
| Q9Z4I3 | LVFFVALAMIGSVFAAEPA  | Positive |
| Q9Z4N3 | LASLLGFLISSAWATETVN  | Positive |
| Q9Z4P0 | SAMALVVLSSGTAMAKTPDM | Positive |
| Q9ZG90 | PIPEVSKAKASTKLLNATTV | Positive |
| Q9ZT16 | QVFLMLALFATSALAQAPAP | Positive |
| Q9ZT64 | VLLFYSLGFGVTTARLDRN  | Positive |
| Q9ZT66 | CLDNPPDRSIHGRQLAEAGE | Positive |
| Q9ZWA9 | VVSLSFLFFHGAEARQREA  | Positive |
| U6A629 | AEYLLPLASYASAVTISV   | Positive |
| U6BLZ9 | AIALGLVARSSLVSAGPCDI | Positive |
| V5NC32 | RLVSFALLGLQIANGAITYQ | Positive |
| V5YM14 | IAVPLSLLAAQIAQAGEGMW | Positive |
| W0HJ53 | AAVTAFALPNELEKRAITSN | Positive |
| W1I921 | VMCVGVLGLSKLCGADSCEY | Positive |
| W5XCJ6 | FGLLVVFLSLSGTGADCPSD | Positive |
| W5XDM0 | FGLLVVFLSLSGTGADQDCL | Positive |
| X2JCV5 | FFMFSLLFLAALESCADDKN | Positive |
| A0AT29 | ACVVLVICMVVIAPMAEGAI | Negative |
| A0AT29 | SCGAVTSDLSPCLTYLTGGP | Negative |
| A0AT29 | MVVIAPMAEGAISCGAVTSD | Negative |
| A0AT29 | AEGAISCGAVTSDLSPCLTY | Negative |
| A0AT29 | ARGMKLACVVLVICMVVIAP | Negative |
| A0AT29 | APMAEGAISCGAVTSDLSPC | Negative |
| A0AT29 | LVICMVVIAPMAEGAISCGA | Negative |
| A0AT29 | VIAPMAEGAISCGAVTSDLS | Negative |
| A0AT29 | GAVTSDLSPCLTYLTGGPGP | Negative |
| A0AT29 | VICMVVIAPMAEGAISCGAV | Negative |
| A0AT29 | MARGMKLACVVLVICMVVIA | Negative |
| A0AT29 | LACVVLVICMVVIAPMAEGA | Negative |
| A0AT29 | RGMKLACVVLVICMVVIAPM | Negative |
| A0AT29 | CMVVIAPMAEGAISCGAVTS | Negative |
| A0AT29 | CGAVTSDLSPCLTYLTGGPG | Negative |
| A0AT29 | VVIAPMAEGAISCGAVTSDL | Negative |
| A0AT29 | GAISCGAVTSDLSPCLTYLT | Negative |
| A0AT29 | MAEGAISCGAVTSDLSPCLT | Negative |
| A0AT29 | VVLVICMVVIAPMAEGAISC | Negative |
| A0AT29 | EGAISCGAVTSDLSPCLTYL | Negative |
| A0AT29 | KLACVVLVICMVVIAPMAEG | Negative |
| A0AT29 | CVVLVICMVVIAPMAEGAIS | Negative |
| A0AT29 | ISCGAVTSDLSPCLTYLTGG | Negative |
| A0AT29 | GMKLACVVLVICMVVIAPMA | Negative |
| A0AT29 | IAPMAEGAISCGAVTSDLSP | Negative |
| A0AT29 | AISCGAVTSDLSPCLTYLTG | Negative |
| A0AT29 | MKLACVVLVICMVVIAPMAE | Negative |

|        |                      |          |
|--------|----------------------|----------|
| A0AT29 | ICMVVIAPMAEGAISCGAVT | Negative |
| A0AT29 | PMAEGAISCGAVTSDLSPCL | Negative |
| A0AT32 | MVVIAPMAEGAISCGAVTSD | Negative |
| A0AT32 | GAVTSDLSPCLTYLTGGPGP | Negative |
| A0AT32 | CGAVTSDLSPCLTYLTGGPG | Negative |
| A0AT32 | VIAPMAEGAISCGAVTSDLS | Negative |
| A0AT32 | MCMVVIAPMAEGAISCGAVT | Negative |
| A0AT32 | GMKLACVVLVMCMVVIAPMA | Negative |
| A0AT32 | MKLACVVLVMCMVVIAPMAE | Negative |
| A0AT32 | KLACVVLVMCMVVIAPMAEG | Negative |
| A0AT32 | CMVVIAPMAEGAISCGAVTS | Negative |
| A0AT32 | LVMCMVVIAPMAEGAISCGA | Negative |
| A0AT32 | RGMKLACVVLVMCMVVIAPM | Negative |
| A0AT32 | PMAEGAISCGAVTSDLSPCL | Negative |
| A0AT32 | ACVVLVMCMVVIAPMAEGAI | Negative |
| A0AT32 | LACVVLVMCMVVIAPMAEGA | Negative |
| A0AT32 | MAEGAISCGAVTSDLSPCLT | Negative |
| A0AT32 | VVIAPMAEGAISCGAVTSDL | Negative |
| A0AT32 | IAPMAEGAISCGAVTSDLSP | Negative |
| A0AT32 | VVLVMCMVVIAPMAEGAISC | Negative |
| A0AT32 | ARGMKLACVVLVMCMVVIAP | Negative |
| A0AT32 | VMCMVVIAPMAEGAISCGAV | Negative |
| A0AT32 | ISCGAVTSDLSPCLTYLTGG | Negative |
| A0AT32 | SCGAVTSDLSPCLTYLTGGP | Negative |
| A0AT32 | EGAISCGAVTSDLSPCLTYL | Negative |
| A0AT32 | APMAEGAISCGAVTSDLSPC | Negative |
| A0AT32 | CVVLVMCMVVIAPMAEGAIS | Negative |
| A0AT32 | GAISCGAVTSDLSPCLTYLT | Negative |
| A0AT32 | AEGAISCGAVTSDLSPCLTY | Negative |
| A0AT32 | AISCGAVTSDLSPCLTYLTG | Negative |
| A0AT32 | MARGMKLACVVLVMCMVVIA | Negative |
| A0P8X0 | SADIAATHVYHNHMPNFWAY | Negative |
| A0P8X0 | TRYLHQITTLILGGLLIVPA | Negative |
| A0P8X0 | ITTLILGGLLIVPAAAPPVS | Negative |
| A0P8X0 | MTRKTRYLHQITTLILGGLL | Negative |
| A0P8X0 | GLLIVPAAAPPVSADIAATH | Negative |
| A0P8X0 | KTRYLHQITTLILGGLLIVP | Negative |
| A0P8X0 | LLIVPAAAPPVSADIAATHV | Negative |
| A0P8X0 | TLILGGLLIVPAAAPPVSAD | Negative |
| A0P8X0 | RYLHQITTLILGGLLIVPAA | Negative |
| A0P8X0 | VSADIAATHVYHNHMPNFWA | Negative |
| A0P8X0 | VPAAAPPVSADIAATHVYHN | Negative |
| A0P8X0 | APPVSADIAATHVYHNHMPN | Negative |
| A0P8X0 | AAPPVSADIAATHVYHNHMP | Negative |
| A0P8X0 | PAAAPPVSADIAATHVYHNH | Negative |
| A0P8X0 | QITTLILGGLLIVPAAAPPV | Negative |

|        |                      |          |
|--------|----------------------|----------|
| A0P8X0 | YLHQITTLILGGLLIVPAAA | Negative |
| A0P8X0 | TRKTRYLHQITTLILGGLLI | Negative |
| A0P8X0 | LGGLLIVPAAAPPVSADIAA | Negative |
| A0P8X0 | LILGGLLIVPAAAPPVSADI | Negative |
| A0P8X0 | AAAPPVSADIAATHVYHNHM | Negative |
| A0P8X0 | RKTRYLHQITTLILGGLLIV | Negative |
| A0P8X0 | HQITTLILGGLLIVPAAAPP | Negative |
| A0P8X0 | LIVPAAAPPVSADIAATHVY | Negative |
| A0P8X0 | ILGGLLIVPAAAPPVSADIA | Negative |
| A0P8X0 | TTLILGGLLIVPAAAPPVSA | Negative |
| A0P8X0 | PPVSADIAATHVYHNHMPNF | Negative |
| A0P8X0 | IVPAAAPPVSADIAATHVYH | Negative |
| A0P8X0 | LHQITTLILGGLLIVPAAAP | Negative |
| A0P8X0 | PVSADIAATHVYHNHMPNFW | Negative |
| A0QR29 | AISRVLIAMVAAIAALFTST | Negative |
| A0QR29 | AALFTSTGTSHAGLDNELSL | Negative |
| A0QR29 | GLDNESSLVDGQDRTLTVQQ | Negative |
| A0QR29 | AMVAAIAALFTSTGTSHAGL | Negative |
| A0QR29 | SHAGLDNESSLVDGQDRTL  | Negative |
| A0QR29 | TGTSHAGLDNESSLVDGQDR | Negative |
| A0QR29 | AGLDNESSLVDGQDRTLTVQ | Negative |
| A0QR29 | DNELSLVDGQDRTLTVQQWD | Negative |
| A0QR29 | LFTSTGTSHAGLDNESSLVD | Negative |
| A0QR29 | VLIAMVAAIAALFTSTGTSH | Negative |
| A0QR29 | ALFTSTGTSHAGLDNESSLV | Negative |
| A0QR29 | LIAMVAAIAALFTSTGTSHA | Negative |
| A0QR29 | VAAIAALFTSTGTSHAGLDN | Negative |
| A0QR29 | STGTSHAGLDNESSLVDGQD | Negative |
| A0QR29 | SRVLIAMVAAIAALFTSTGT | Negative |
| A0QR29 | AIAALFTSTGTSHAGLDNEL | Negative |
| A0QR29 | MVAAIAALFTSTGTSHAGLD | Negative |
| A0QR29 | TSTGTSHAGLDNESSLVDGQ | Negative |
| A0QR29 | TSHAGLDNESSLVDGQDRTL | Negative |
| A0QR29 | GTSHAGLDNESSLVDGQDRT | Negative |
| A0QR29 | KAISRVLIAMVAAIAALFTS | Negative |
| A0QR29 | RVLIAMVAAIAALFTSTGTS | Negative |
| A0QR29 | MKAISRVLIAMVAAIAALFT | Negative |
| A0QR29 | FTSTGTSHAGLDNESSLVDG | Negative |
| A0QR29 | IAMVAAIAALFTSTGTSHAG | Negative |
| A0QR29 | ISRVLIAMVAAIAALFTSTG | Negative |
| A0QR29 | LDNESSLVDGQDRTLTVQQW | Negative |
| A0QR29 | HAGLDNESSLVDGQDRTLTV | Negative |
| A0QR29 | IAALFTSTGTSHAGLDNELS | Negative |
| A1BQQ5 | SIVFVAGTKRHACDSKYSEV | Negative |
| A1BQQ5 | ILMLSIVFVAGTKRHACDSK | Negative |
| A1BQQ5 | GTKRHACDSKYSEVTPHTM  | Negative |

|        |                      |          |
|--------|----------------------|----------|
| A1BQQ5 | LSTMQTVGAILMLSIVFVAG | Negative |
| A1BQQ5 | RHACDSKYSEVTPHTMCLT  | Negative |
| A1BQQ5 | LSIVFVAGTKRHACDSKYSE | Negative |
| A1BQQ5 | DSKYSEVTPHTMCLTDNAN  | Negative |
| A1BQQ5 | MLSTMQTVGAILMLSIVFVA | Negative |
| A1BQQ5 | MQTVGAILMLSIVFVAGTKR | Negative |
| A1BQQ5 | STMQTVGAILMLSIVFVAGT | Negative |
| A1BQQ5 | QTVGAILMLSIVFVAGTKRH | Negative |
| A1BQQ5 | LMLSIVFVAGTKRHACDSKY | Negative |
| A1BQQ5 | FVAGTKRHACDSKYSEVTP  | Negative |
| A1BQQ5 | KYSEVTPHTMCLTDNANAV  | Negative |
| A1BQQ5 | HACDSKYSEVTPHTMCLTD  | Negative |
| A1BQQ5 | IVFVAGTKRHACDSKYSEVT | Negative |
| A1BQQ5 | MLSIVFVAGTKRHACDSKYS | Negative |
| A1BQQ5 | VAGTKRHACDSKYSEVTPH  | Negative |
| A1BQQ5 | ACDSKYSEVTPHTMCLTDN  | Negative |
| A1BQQ5 | TKRHACDSKYSEVTPHTMC  | Negative |
| A1BQQ5 | SKYSEVTPHTMCLTDNANA  | Negative |
| A1BQQ5 | TVGAILMLSIVFVAGTKRHA | Negative |
| A1BQQ5 | TMQTVGAILMLSIVFVAGTK | Negative |
| A1BQQ5 | VFVAGTKRHACDSKYSEVTP | Negative |
| A1BQQ5 | CDSKYSEVTPHTMCLTDNA  | Negative |
| A1BQQ5 | GAILMLSIVFVAGTKRHACD | Negative |
| A1BQQ5 | AGTKRHACDSKYSEVTPHT  | Negative |
| A1BQQ5 | VGAILMLSIVFVAGTKRHAC | Negative |
| A1BQQ5 | KRHACDSKYSEVTPHTMCL  | Negative |
| A1C3L3 | YKRAGETSRKTRVKMHKSGK | Negative |
| A1C3L3 | TSRKTRVKMHKSGKNWVRTL | Negative |
| A1C3L3 | RTLISQIGLMHFLGGSISEK | Negative |
| A1C3L3 | TLISQIGLMHFLGGSISEKK | Negative |
| A1C3L3 | VKMHKSGKNWVRTLISQIGL | Negative |
| A1C3L3 | SRKTRVKMHKSGKNWVRTLI | Negative |
| A1C3L3 | WVRTLISQIGLMHFLGGSIS | Negative |
| A1C3L3 | ETSRKTRVKMHKSGKNWVRT | Negative |
| A1C3L3 | RKTRVKMHKSGKNWVRTLIS | Negative |
| A1C3L3 | TRVKMHKSGKNWVRTLISQI | Negative |
| A1C3L3 | KNWVRTLISQIGLMHFLGGS | Negative |
| A1C3L3 | GKNWVRTLISQIGLMHFLGG | Negative |
| A1C3L3 | RAGETSRKTRVKMHKSGKNW | Negative |
| A1C3L3 | HKSGKNWVRTLISQIGLMHF | Negative |
| A1C3L3 | ISQIGLMHFLGGSISEKKIN | Negative |
| A1C3L3 | SGKNWVRTLISQIGLMHFLG | Negative |
| A1C3L3 | KTRVKMHKSGKNWVRTLISQ | Negative |
| A1C3L3 | KSGKNWVRTLISQIGLMHFL | Negative |
| A1C3L3 | KYKRAGETSRKTRVKMHKSG | Negative |
| A1C3L3 | NWVRTLISQIGLMHFLGGS  | Negative |

|        |                      |          |
|--------|----------------------|----------|
| A1C3L3 | GETSRKTRVKMHKSGKNWVR | Negative |
| A1C3L3 | LISQIGLMHFLGGSISEKKI | Negative |
| A1C3L3 | KMHKSGKNWVRTLISQIGLM | Negative |
| A1C3L3 | MGKYKRAGETSRKTRVKMHK | Negative |
| A1C3L3 | KRAGETSRKTRVKMHKSGKN | Negative |
| A1C3L3 | GKYKRAGETSRKTRVKMHKS | Negative |
| A1C3L3 | MHKSGKNWVRTLISQIGLMH | Negative |
| A1C3L3 | RVKMHKSGKNWVRTLISQIG | Negative |
| A1C3L3 | AGETSRKTRVKMHKSGKNWV | Negative |
| A1C3L3 | VRTLISQIGLMHFLGGSISE | Negative |
| A1X158 | NMNILTLFAVLIGSASAVYH | Negative |
| A1X158 | WIAPKPWTAWKVHPPAWTAW | Negative |
| A1X158 | WTAWIAPKPWTAWKVHPPAW | Negative |
| A1X158 | AWIAPKPWTAWKVHPPAWTA | Negative |
| A1X158 | TLFAVLIGSASAVYHPPSWT | Negative |
| A1X158 | MARNMNILTLFAVLIGSASA | Negative |
| A1X158 | LTLFAVLIGSASAVYHPPSW | Negative |
| A1X158 | LFAVLIGSASAVYHPPSWTA | Negative |
| A1X158 | SAVYHPPSWTAWIAPKPWTA | Negative |
| A1X158 | TAWIAPKPWTAWKVHPPAWT | Negative |
| A1X158 | FAVLIGSASAVYHPPSWTAW | Negative |
| A1X158 | SASAVYHPPSWTAWIAPKPW | Negative |
| A1X158 | VYHPPSWTAWIAPKPWTAWK | Negative |
| A1X158 | SWTAWIAPKPWTAWKVHPPA | Negative |
| A1X158 | GSASAVYHPPSWTAWIAPKP | Negative |
| A1X158 | ASAVYHPPSWTAWIAPKPWT | Negative |
| A1X158 | PSWTAWIAPKPWTAWKVHPP | Negative |
| A1X158 | ILTLFAVLIGSASAVYHPPS | Negative |
| A1X158 | HPPSWTAWIAPKPWTAWKVH | Negative |
| A1X158 | MNILTLFAVLIGSASAVYHP | Negative |
| A1X158 | VLIGSASAVYHPPSWTAWIA | Negative |
| A1X158 | AVLIGSASAVYHPPSWTAWI | Negative |
| A1X158 | ARNMNILTLFAVLIGSASAV | Negative |
| A1X158 | YHPPSWTAWIAPKPWTAWKV | Negative |
| A1X158 | LIGSASAVYHPPSWTAWIAP | Negative |
| A1X158 | AVYHPPSWTAWIAPKPWTAW | Negative |
| A1X158 | PPSWTAWIAPKPWTAWKVHP | Negative |
| A1X158 | RNMNILTLFAVLIGSASAVY | Negative |
| A1X158 | IGSASAVYHPPSWTAWIAPK | Negative |
| A1X159 | YHPPSWTAWIAPKPWTAWKV | Negative |
| A1X159 | LFAVLLGSASAVYHPPSWTA | Negative |
| A1X159 | HPPSWTAWIAPKPWTAWKVP | Negative |
| A1X159 | PPSWTAWIAPKPWTAWKVPP | Negative |
| A1X159 | MARNMNILTLFAVLLGSASA | Negative |
| A1X159 | VLLGSASAVYHPPSWTAWIA | Negative |
| A1X159 | AVLLGSASAVYHPPSWTAWI | Negative |

|        |                      |          |
|--------|----------------------|----------|
| A1X159 | ARNMNILTLFAVLLGSASAV | Negative |
| A1X159 | ASAVYHPPSWTAWIAPKPWT | Negative |
| A1X159 | FAVLLGSASAVYHPPSWTAW | Negative |
| A1X159 | VYHPPSWTAWIAPKPWTAWK | Negative |
| A1X159 | AVYHPPSWTAWIAPKPWTAW | Negative |
| A1X159 | MNILTLFAVLLGSASAVYHP | Negative |
| A1X159 | TAWIAPKPWTAWKVPPPAWT | Negative |
| A1X159 | TLFAVLLGSASAVYHPPSWT | Negative |
| A1X159 | RNMNILTLFAVLLGSASAVY | Negative |
| A1X159 | PSWTAWIAPKPWTAWKVPPP | Negative |
| A1X159 | AWIAPKPWTAWKVPPPAWTA | Negative |
| A1X159 | SWTAWIAPKPWTAWKVPPPA | Negative |
| A1X159 | ILTLFAVLLGSASAVYHPPS | Negative |
| A1X159 | SASAVYHPPSWTAWIAPKPW | Negative |
| A1X159 | SAVYHPPSWTAWIAPKPWTA | Negative |
| A1X159 | LLGSASAVYHPPSWTAWIAP | Negative |
| A1X159 | LGSASAVYHPPSWTAWIAPK | Negative |
| A1X159 | WIAPKPWTAWKVPPPAWTAW | Negative |
| A1X159 | GSASAVYHPPSWTAWIAPKP | Negative |
| A1X159 | LTLFAVLLGSASAVYHPPSW | Negative |
| A1X159 | NMNILTLFAVLLGSASAVYH | Negative |
| A1X159 | WTAWIAPKPWTAWKVPPPAW | Negative |
| A1XRN2 | VQMLNSMIEAVMILQRDFAN | Negative |
| A1XRN2 | LNSMIEAVMILQRDFANLRH | Negative |
| A1XRN2 | NGDEKSDVQMLNSMIEAVM  | Negative |
| A1XRN2 | LANGDEKSDVQMLNSMIEA  | Negative |
| A1XRN2 | LLLGTFLANGDEKSDVQML  | Negative |
| A1XRN2 | EKSDVQMLNSMIEAVMILQ  | Negative |
| A1XRN2 | DEKSDVQMLNSMIEAVMIL  | Negative |
| A1XRN2 | LLLLGTFLANGDEKSDVQM  | Negative |
| A1XRN2 | SGLLLLGTFLANGDEKSDV  | Negative |
| A1XRN2 | LLGTFLANGDEKSDVQMLN  | Negative |
| A1XRN2 | DSDVQMLNSMIEAVMILQRD | Negative |
| A1XRN2 | QMLNSMIEAVMILQRDFANL | Negative |
| A1XRN2 | LGTFLANGDEKSDVQMLNS  | Negative |
| A1XRN2 | KSDVQMLNSMIEAVMILQR  | Negative |
| A1XRN2 | ILLSGLLLLGTFLANGDEKD | Negative |
| A1XRN2 | LILLSGLLLLGTFLANGDEK | Negative |
| A1XRN2 | NSMIEAVMILQRDFANLRHA | Negative |
| A1XRN2 | DVQMLNSMIEAVMILQRDFA | Negative |
| A1XRN2 | SDVQMLNSMIEAVMILQRDF | Negative |
| A1XRN2 | MRLILLSGLLLLGTFLANGD | Negative |
| A1XRN2 | GDEKSDVQMLNSMIEAVMI  | Negative |
| A1XRN2 | MLNSMIEAVMILQRDFANLR | Negative |
| A1XRN2 | ANGDEKSDVQMLNSMIEAV  | Negative |
| A1XRN2 | GLLLLGTFLANGDEKSDVQ  | Negative |



|        |                       |          |
|--------|-----------------------|----------|
| A1XRN2 | LSGLLLLGTFLANGDEKDSD  | Negative |
| A1XRN2 | RLILLSGLLLLGTFLANGDE  | Negative |
| A1XRN2 | GTFLANGDEKSDSVQMLNSM  | Negative |
| A1XRN2 | FLANGDEKSDSVQMLNSMIE  | Negative |
| A1XRN2 | TFLANGDEKSDSVQMLNSMI  | Negative |
| A2AEP0 | FGLAHVHAHDHPELQGQWKT  | Negative |
| A2AEP0 | LVFGLAHVHAHDHPELQGQW  | Negative |
| A2AEP0 | HDHPELQGQWKTТАIMADNI  | Negative |
| A2AEP0 | LQGQWKTТАIMADNIDKIET  | Negative |
| A2AEP0 | MVKFLLLALVFGLAHVHAHD  | Negative |
| A2AEP0 | QGQWKTТАIMADNIDKIETS  | Negative |
| A2AEP0 | GQWKTТАIMADNIDKIETSG  | Negative |
| A2AEP0 | QWKTТАIMADNIDKIETSGP  | Negative |
| A2AEP0 | WKTТАIMADNIDKIETSGPL  | Negative |
| A2AEP0 | KTTAIMADNIDKIETSGPLE  | Negative |
| A2AEP0 | ALVFGLAHVHAHDHPELQGQ  | Negative |
| A2AEP0 | GLAHVHAHDHPELQGQWKTТ  | Negative |
| A2AEP0 | PELQGQWKTТАIMADNIDKI  | Negative |
| A2AEP0 | VKFLLLALVFGLAHVHAHDH  | Negative |
| A2AEP0 | KFLLLALVFGLAHVHAHDHP  | Negative |
| A2AEP0 | HVHAHDHPELQGQWKTТАIM  | Negative |
| A2AEP0 | ELQGQWKTТАIMADNIDKIE  | Negative |
| A2AEP0 | HPELQGQWKTТАIMADNIDK  | Negative |
| A2AEP0 | HAHDHPELQGQWKTТАIMAD  | Negative |
| A2AEP0 | LALVFGLAHVHAHDHPELQG  | Negative |
| A2AEP0 | VFGLAHVHAHDHPELQGQWK  | Negative |
| A2AEP0 | LLLALVFGLAHVHAHDHPEL  | Negative |
| A2AEP0 | AHDHPELQGQWKTТАIMADN  | Negative |
| A2AEP0 | VHAHDHPELQGQWKTТАIMA  | Negative |
| A2AEP0 | MMVKFLLLALVFGLAHVHAH  | Negative |
| A2AEP0 | DHPELQGQWKTТАIMADNID  | Negative |
| A2AEP0 | LLALVFGLAHVHAHDHPELQ  | Negative |
| A2AEP0 | AHVHAHDHPELQGQWKTТАI  | Negative |
| A2AEP0 | LAHVHAHDHPELQGQWKTТА  | Negative |
| A2AJB7 | GLCVGLAAGTEAAVVKDFDV  | Negative |
| A2AJB7 | RHMESIMLFTLLGLCVGLAA  | Negative |
| A2AJB7 | LCVGLAAGTEAAVVKDFDVN  | Negative |
| A2AJB7 | SIMLFTLLGLCVGLAAGTEA  | Negative |
| A2AJB7 | IMLFTLLGLCVGLAAGTEAA  | Negative |
| A2AJB7 | SVARHMESIMLFTLLGLCVG  | Negative |
| A2AJB7 | HMESIMLFTLLGLCVGLAAG  | Negative |
| A2AJB7 | AGTEAAVVKDFDVNKF LGFW | Negative |
| A2AJB7 | EAAVVKDFDVNKF LGFWYEI | Negative |
| A2AJB7 | FTLLGLCVGLAAGTEAAVVK  | Negative |
| A2AJB7 | MESIMLFTLLGLCVGLAAGT  | Negative |
| A2AJB7 | VGLAAGTEAAVVKDFDVNKF  | Negative |

|        |                       |          |
|--------|-----------------------|----------|
| A2AJB7 | LFTLLGLCVGLAAGTEAAVV  | Negative |
| A2AJB7 | AAGTEAAVVKDFDVNKFLGF  | Negative |
| A2AJB7 | MCSVARHMESIMLFTLLGLC  | Negative |
| A2AJB7 | AAVVKDFDVNKFLGFWYEIA  | Negative |
| A2AJB7 | VARHMESIMLFTLLGLCVGL  | Negative |
| A2AJB7 | ARHMESIMLFTLLGLCVGLA  | Negative |
| A2AJB7 | AVVKDFDVNKFLGFWYEIAL  | Negative |
| A2AJB7 | LLGLCVGLAAGTEAAVVKDF  | Negative |
| A2AJB7 | TLLGLCVGLAAGTEAAVVKD  | Negative |
| A2AJB7 | ESIMLFTLLGLCVGLAAGTE  | Negative |
| A2AJB7 | GLAAGTEAAVVKDFDVNKFL  | Negative |
| A2AJB7 | CSVARHMESIMLFTLLGLCV  | Negative |
| A2AJB7 | TEAAVVKDFDVNKFLGFWYE  | Negative |
| A2AJB7 | CVGLAAGTEAAVVKDFDVNK  | Negative |
| A2AJB7 | LGLCVGLAAGTEAAVVKDFD  | Negative |
| A2AJB7 | LAAGTEAAVVKDFDVNKFLG  | Negative |
| A2AJB7 | GTEAAVVKDFDVNKFLGFWY  | Negative |
| A2CKF7 | KTLLLTLLVVVTIVCLDLGYT | Negative |
| A2CKF7 | LDLGYTLTCLICPEKYCQKV  | Negative |
| A2CKF7 | VVVTIVCLDLGYTLTCLICP  | Negative |
| A2CKF7 | IVCLDLGYTLTCLICPEKYC  | Negative |
| A2CKF7 | CPEKYCQKVHTCRDGENLCV  | Negative |
| A2CKF7 | VVTIVCLDLGYTLTCLICPE  | Negative |
| A2CKF7 | LICPEKYCQKVHTCRDGENL  | Negative |
| A2CKF7 | CLDLGYTLTCLICPEKYCQK  | Negative |
| A2CKF7 | LLTLVVVTIVCLDLGYTLT   | Negative |
| A2CKF7 | LLTLVVVTIVCLDLGYTLTC  | Negative |
| A2CKF7 | CLICPEKYCQKVHTCRDGEN  | Negative |
| A2CKF7 | GYTLTCLICPEKYCQKVHTC  | Negative |
| A2CKF7 | MKTLLLTLLVVVTIVCLDLGY | Negative |
| A2CKF7 | KYCQKVHTCRDGENLCVKRF  | Negative |
| A2CKF7 | LVVVTIVCLDLGYTLTCLIC  | Negative |
| A2CKF7 | ICPEKYCQKVHTCRDGENLC  | Negative |
| A2CKF7 | LTLVVVTIVCLDLGYTLTCL  | Negative |
| A2CKF7 | TIVCLDLGYTLTCLICPEKY  | Negative |
| A2CKF7 | DLGYTLTCLICPEKYCQKVH  | Negative |
| A2CKF7 | EKYCQKVHTCRDGENLCVKR  | Negative |
| A2CKF7 | LGYTTLTCLICPEKYCQKVHT | Negative |
| A2CKF7 | YTLTCLICPEKYCQKVHTCR  | Negative |
| A2CKF7 | PEKYCQKVHTCRDGENLCVK  | Negative |
| A2CKF7 | VTIVCLDLGYTLTCLICPEK  | Negative |
| A2CKF7 | TLLLTLVVVTIVCLDLGYTL  | Negative |
| A2CKF7 | LTCLICPEKYCQKVHTCRDG  | Negative |
| A2CKF7 | TLTCLICPEKYCQKVHTCRD  | Negative |
| A2CKF7 | VCLDLGYTLTCLICPEKYCQ  | Negative |
| A2CKF7 | TCLICPEKYCQKVHTCRDGE  | Negative |

|        |                       |          |
|--------|-----------------------|----------|
| A2SY66 | EVHPSHYATTFNKSLFPKDF  | Negative |
| A2SY66 | QEVHPSHYATTFNKSLFPKD  | Negative |
| A2SY66 | VVTGTGTSPSQEVHPSHYATT | Negative |
| A2SY66 | TGTGTSPSQEVHPSHYATTFN | Negative |
| A2SY66 | ISPSLLYLFSLATLLAVVTG  | Negative |
| A2SY66 | TGTSPSQEVHPSHYATTFNKS | Negative |
| A2SY66 | LYLFSLATLLAVVTGTGTSPS | Negative |
| A2SY66 | LATLLAVVTGTGTSPSQEVHP | Negative |
| A2SY66 | GTPSQEVHPSHYATTFNKSL  | Negative |
| A2SY66 | PSHYATTFNKSLFPKDFLFG  | Negative |
| A2SY66 | FSLATLLAVVTGTGTSPSQEV | Negative |
| A2SY66 | SQEVHPSHYATTFNKSLFPK  | Negative |
| A2SY66 | VTGTGTSPSQEVHPSHYATTF | Negative |
| A2SY66 | YLFSLATLLAVVTGTGTSPSQ | Negative |
| A2SY66 | PSLLYLFSLATLLAVVTGTG  | Negative |
| A2SY66 | TLLAVVTGTGTSPSQEVHPSH | Negative |
| A2SY66 | PSQEVHPSHYATTFNKSLFP  | Negative |
| A2SY66 | SPSLLYLFSLATLLAVVTGT  | Negative |
| A2SY66 | SLLYLFSLATLLAVVTGTGT  | Negative |
| A2SY66 | LLAVVTGTGTSPSQEVHPSHY | Negative |
| A2SY66 | VHPSHYATTFNKSLFPKDFL  | Negative |
| A2SY66 | GTGTSPSQEVHPSHYATTFNK | Negative |
| A2SY66 | SLATLLAVVTGTGTSPSQEVH | Negative |
| A2SY66 | AVVTGTGTSPSQEVHPSHYAT | Negative |
| A2SY66 | HPSHYATTFNKSLFPKDFLF  | Negative |
| A2SY66 | LFSLATLLAVVTGTGTSPSQE | Negative |
| A2SY66 | TPSQEVHPSHYATTFNKSLF  | Negative |
| A2SY66 | LAVVTGTGTSPSQEVHPSHYA | Negative |
| A2SY66 | ATLLAVVTGTGTSPSQEVHPS | Negative |
| A2TJI4 | AMGSLSAIAGGGNSERPPSV  | Negative |
| A2TJI4 | SERPPSVAAGECVTFNSKLG  | Negative |
| A2TJI4 | VILAMGSLSAIAGGGNSERP  | Negative |
| A2TJI4 | MGSLSAIAGGGNSERPPSVA  | Negative |
| A2TJI4 | PSVAAGECVTFNSKLGEIGG  | Negative |
| A2TJI4 | MKKYILGVILAMGSLSAIAG  | Negative |
| A2TJI4 | IAGGGNSERPPSVAAGECVT  | Negative |
| A2TJI4 | VAAGECVTFNSKLGEIGGYS  | Negative |
| A2TJI4 | GNSERPPSVAAGECVTFNSK  | Negative |
| A2TJI4 | GSLSAIAGGGNSERPPSVAA  | Negative |
| A2TJI4 | SAIAGGGNSERPPSVAAGEC  | Negative |
| A2TJI4 | NSERPPSVAAGECVTFNSKL  | Negative |
| A2TJI4 | GVILAMGSLSAIAGGGNSER  | Negative |
| A2TJI4 | PPSVAAGECVTFNSKLGEIG  | Negative |
| A2TJI4 | LAMGSLSAIAGGGNSERPPS  | Negative |
| A2TJI4 | ILAMGSLSAIAGGGNSERPP  | Negative |
| A2TJI4 | KYILGVILAMGSLSAIAGGG  | Negative |

|        |                        |          |
|--------|------------------------|----------|
| A2TJI4 | YILGVILAMGSLSAIAGGGN   | Negative |
| A2TJI4 | SVAAGECVTFNSKLGEIGGY   | Negative |
| A2TJI4 | SLSAIAGGGNSERPPSVAAG   | Negative |
| A2TJI4 | GGNSERPPSVAAGECVTFNS   | Negative |
| A2TJI4 | RPPSVAAGECVTFNSKLGEI   | Negative |
| A2TJI4 | LGVILAMGSLSAIAGGGNSE   | Negative |
| A2TJI4 | GGGNSERPPSVAAGECVTFN   | Negative |
| A2TJI4 | AGGGNSERPPSVAAGECVTF   | Negative |
| A2TJI4 | LSAIAGGGNSERPPSVAAGE   | Negative |
| A2TJI4 | KKYILGVILAMGSLSAIAGG   | Negative |
| A2TJI4 | AIAGGGNSERPPSVAAGECV   | Negative |
| A2TJI4 | ERPPSVAAGECVTFNSKLGE   | Negative |
| A2VBC4 | FNEYDILFFVYTRQQRDGIV   | Negative |
| A2VBC4 | YDILFFVYTRQQRDGIVLTE   | Negative |
| A2VBC4 | FGTLDRGLIPEC PFNEYDIL  | Negative |
| A2VBC4 | SILFICFGTLDRGLIPEC PF  | Negative |
| A2VBC4 | ECPFNEYDILFFVYTRQQRD   | Negative |
| A2VBC4 | PEC PFNEYDILFFVYTRQQR  | Negative |
| A2VBC4 | ILFFVYTRQQRDGIVLTEET   | Negative |
| A2VBC4 | IPEC PFNEYDILFFVYTRQQ  | Negative |
| A2VBC4 | PFNEYDILFFVYTRQQRDGI   | Negative |
| A2VBC4 | TLDRGLIPEC PFNEYDILFF  | Negative |
| A2VBC4 | MNFKYSILFICFGTLDRGLI   | Negative |
| A2VBC4 | FICFGTLDRGLIPEC PFNEY  | Negative |
| A2VBC4 | ILFICFGTLDRGLIPEC PFN  | Negative |
| A2VBC4 | CPFNEYDILFFVYTRQQRDG   | Negative |
| A2VBC4 | NEYDILFFVYTRQQRDGIVL   | Negative |
| A2VBC4 | GLIPEC PFNEYDILFFVYTR  | Negative |
| A2VBC4 | FKYSILFICFGTLDRGLIPE   | Negative |
| A2VBC4 | LFICFGTLDRGLIPEC PFNE  | Negative |
| A2VBC4 | LDRGLIPEC PFNEYDILFFV  | Negative |
| A2VBC4 | ICFGTLDRGLIPEC PFNEYD  | Negative |
| A2VBC4 | RGLIPEC PFNEYDILFFVYT  | Negative |
| A2VBC4 | LIPEC PFNEYDILFFVYTRQ  | Negative |
| A2VBC4 | DRGLIPEC PFNEYDILFFVY  | Negative |
| A2VBC4 | YSILFICFGTLDRGLIPEC P  | Negative |
| A2VBC4 | DILFFVYTRQQRDGIVLTEE   | Negative |
| A2VBC4 | EYDILFFVYTRQQRDGIVLT   | Negative |
| A2VBC4 | GTLDRGLIPEC PFNEYDILF  | Negative |
| A2VBC4 | NFKYSILFICFGTLDRGLIP   | Negative |
| A2VBC4 | CFGTLDRGLIPEC PFNEYDI  | Negative |
| A3DH67 | MVKS RKISILLAVAMLV SIM | Negative |
| A3DH67 | MLV SIMIPTTAFAGPTKAPT  | Negative |
| A3DH67 | FAGPTKAPT KDGT SYKDLFL | Negative |
| A3DH67 | IPTTAFAGPTKAPT KDGT SY | Negative |
| A3DH67 | LLAVAMLV SIMIPTTAFAGP  | Negative |

|        |                      |          |
|--------|----------------------|----------|
| A3DH67 | ILLAVAMLVSIMIPTTAFAG | Negative |
| A3DH67 | VKSRKISILLAVAMLVSIMI | Negative |
| A3DH67 | MIPTTAFAGPTKAPTKDGTS | Negative |
| A3DH67 | SIMIPTTAFAGPTKAPTKDG | Negative |
| A3DH67 | LVSIMIPTTAFAGPTKAPTK | Negative |
| A3DH67 | AVAMLVSIMIPTTAFAGPTK | Negative |
| A3DH67 | PTTAFAGPTKAPTKDGTSYK | Negative |
| A3DH67 | AMLVSIMIPTTAFAGPTKAP | Negative |
| A3DH67 | GPTKAPTKDGTSYKDLFLEL | Negative |
| A3DH67 | PTKAPTKDGTSYKDLFELY  | Negative |
| A3DH67 | IMIPTTAFAGPTKAPTKDGT | Negative |
| A3DH67 | AFAGPTKAPTKDGTSYKDLF | Negative |
| A3DH67 | SILLAVAMLVSIMIPTTAFA | Negative |
| A3DH67 | SRKISILLAVAMLVSIMIPT | Negative |
| A3DH67 | VSIMIPTTAFAGPTKAPTKD | Negative |
| A3DH67 | LAVAMLVSIMIPTTAFAGPT | Negative |
| A3DH67 | TKAPTKDGTSYKDLFLELYG | Negative |
| A3DH67 | AGPTKAPTKDGTSYKDLFLE | Negative |
| A3DH67 | KSRKISILLAVAMLVSIMIP | Negative |
| A3DH67 | KISILLAVAMLVSIMIPTTA | Negative |
| A3DH67 | RKISILLAVAMLVSIMIPTT | Negative |
| A3DH67 | TAFAGPTKAPTKDGTSYKDL | Negative |
| A3DH67 | TTAFAGPTKAPTKDGTSYKD | Negative |
| A3DH67 | ISILLAVAMLVSIMIPTTAF | Negative |
| A3RF67 | IAFAKEVRATITEVPPFNRN | Negative |
| A3RF67 | VSTSASIAFAKEVRATITEV | Negative |
| A3RF67 | KAILLLGLLALVSTSASIAF | Negative |
| A3RF67 | LGLLALVSTSASIAFAKEVR | Negative |
| A3RF67 | LALVSTSASIAFAKEVRATI | Negative |
| A3RF67 | KEVRATITEVPPFNNSFPS  | Negative |
| A3RF67 | AFAKEVRATITEVPPFNNS  | Negative |
| A3RF67 | MTFKAILLLGLLALVSTSAS | Negative |
| A3RF67 | FKAILLLGLLALVSTSASIA | Negative |
| A3RF67 | FAKEVRATITEVPPFNNSF  | Negative |
| A3RF67 | ASIAFAKEVRATITEVPPFN | Negative |
| A3RF67 | LLGLLALVSTSASIAFAKEV | Negative |
| A3RF67 | AMTFKAILLLGLLALVSTSA | Negative |
| A3RF67 | TSASIAFAKEVRATITEVPP | Negative |
| A3RF67 | ILLGLLALVSTSASIAFAK  | Negative |
| A3RF67 | SASIAFAKEVRATITEVPPF | Negative |
| A3RF67 | HAMTFKAILLLGLLALVSTS | Negative |
| A3RF67 | ALVSTSASIAFAKEVRATIT | Negative |
| A3RF67 | LLALVSTSASIAFAKEVRAT | Negative |
| A3RF67 | STSASIAFAKEVRATITEVP | Negative |
| A3RF67 | MHAMTFKAILLLGLLALVST | Negative |
| A3RF67 | AILLGLLALVSTSASIAFA  | Negative |

|        |                       |          |
|--------|-----------------------|----------|
| A3RF67 | AKEVRATITEVPPFNRNSFP  | Negative |
| A3RF67 | VRATITEVPPFNRNSFPSDF  | Negative |
| A3RF67 | SIAFAKEVRATITEVPPFNR  | Negative |
| A3RF67 | LLLGLLALVSTSASIAFAKE  | Negative |
| A3RF67 | EV RATITEVPPFNRNSFPSD | Negative |
| A3RF67 | GLLALVSTSASIAFAKEVRA  | Negative |
| A3RF67 | TFKAILLLGLLALVSTSASI  | Negative |
| A3RJ36 | SCRRNKGICVPIRCPGSMRQ  | Negative |
| A3RJ36 | ALLFLVLSAGSGFTQGVRNS  | Negative |
| A3RJ36 | HHL LALLFLVLSAGSGFTQ  | Negative |
| A3RJ36 | SQSCRRNKGICVPIRCPGSM  | Negative |
| A3RJ36 | AGSGFTQGVRNSQSCRRNKG  | Negative |
| A3RJ36 | LSAGSGFTQGVRNSQSCRRN  | Negative |
| A3RJ36 | GSGFTQGVRNSQSCRRNKG I | Negative |
| A3RJ36 | MRLHHL LALLFLVLSAGSG  | Negative |
| A3RJ36 | LLLALLFLVLSAGSGFTQGV  | Negative |
| A3RJ36 | FLVLSAGSGFTQGVRNSQSC  | Negative |
| A3RJ36 | QSCRRNKGICVPIRCPGSMR  | Negative |
| A3RJ36 | VRNSQSCRRNKGICVPIRCP  | Negative |
| A3RJ36 | RLHHL LALLFLVLSAGSGF  | Negative |
| A3RJ36 | RNSQSCRRNKGICVPIRCPG  | Negative |
| A3RJ36 | LVL SAGSGFTQGVRNSQSCR | Negative |
| A3RJ36 | HLL LALLFLVLSAGSGFTQG | Negative |
| A3RJ36 | LHHL LALLFLVLSAGSGFT  | Negative |
| A3RJ36 | GVRNSQSCRRNKGICVPIRC  | Negative |
| A3RJ36 | LLALLFLVLSAGSGFTQGVR  | Negative |
| A3RJ36 | TQGV RNSQSCRRNKGICVPI | Negative |
| A3RJ36 | NSQSCRRNKGICVPIRCPGS  | Negative |
| A3RJ36 | SGFTQGVRNSQSCRRNKGIC  | Negative |
| A3RJ36 | VLSAGSGFTQGVRNSQSCRR  | Negative |
| A3RJ36 | GFTQGVRNSQSCRRNKGICV  | Negative |
| A3RJ36 | QGV RNSQSCRRNKGICVPIR | Negative |
| A3RJ36 | LFLVLSAGSGFTQGVRNSQS  | Negative |
| A3RJ36 | SAGSGFTQGVRNSQSCRRNK  | Negative |
| A3RJ36 | FTQGV RNSQSCRRNKGICVP | Negative |
| A4QD57 | AALTAASAPLVAASPAHALA  | Negative |
| A4QD57 | ASFTTKALS VLAALTAASAP | Negative |
| A4QD57 | SFTTKALS VLAALTAASAPL | Negative |
| A4QD57 | AHALANARNVTGSSTTSDSI  | Negative |
| A4QD57 | PLVAASPAHALANARNVTGS  | Negative |
| A4QD57 | SAPLVAASPAHALANARNVT  | Negative |
| A4QD57 | SVLAALTAASAPLVAASPAH  | Negative |
| A4QD57 | MSSASFTTKALS VLAALTAA | Negative |
| A4QD57 | PAHALANARNVTGSSTTSDS  | Negative |
| A4QD57 | LSVLAALTAASAPLVAASPA  | Negative |
| A4QD57 | ASPAHALANARNVTGSSTTS  | Negative |

|        |                      |          |
|--------|----------------------|----------|
| A4QD57 | ALTAASAPLVAASPAHALAN | Negative |
| A4QD57 | AASPAHALANARNVTGSSTT | Negative |
| A4QD57 | KALSVLAALTAASAPLVAAS | Negative |
| A4QD57 | APLVAASPAHALANARNVTG | Negative |
| A4QD57 | FTTKALSVLAALTAASAPLV | Negative |
| A4QD57 | ASAPLVAASPAHALANARNV | Negative |
| A4QD57 | AASAPLVAASPAHALANARN | Negative |
| A4QD57 | TTKALSVLAALTAASAPLVA | Negative |
| A4QD57 | SASFTTKALSVLAALTAASA | Negative |
| A4QD57 | ALSVLAALTAASAPLVAASP | Negative |
| A4QD57 | VAASPAHALANARNVTGSST | Negative |
| A4QD57 | LTAASAPLVAASPAHALANA | Negative |
| A4QD57 | SPAHALANARNVTGSSTTSD | Negative |
| A4QD57 | VLAALTAASAPLVAASPAHA | Negative |
| A4QD57 | LVAASPAHALANARNVTGSS | Negative |
| A4QD57 | TKALSVLAALTAASAPLVAA | Negative |
| A4QD57 | LAALTAASAPLVAASPAHAL | Negative |
| A4QD57 | SSASFTTKALSVLAALTAAS | Negative |
| A4QFQ3 | TAAIASPAQAAEVVPGTGI  | Negative |
| A4QFQ3 | ASAVALGATAAIASPAQAAE | Negative |
| A4QFQ3 | KAVAASAVALGATAAIASPA | Negative |
| A4QFQ3 | ALGATAAIASPAQAAEVVVP | Negative |
| A4QFQ3 | AAIASPAQAAEVVVPGTGIS | Negative |
| A4QFQ3 | ATAAIASPAQAAEVVVPGTG | Negative |
| A4QFQ3 | AIASPAQAAEVVVPGTGISV | Negative |
| A4QFQ3 | SNATRKAVAASAVALGATAA | Negative |
| A4QFQ3 | GATAAIASPAQAAEVVVPGT | Negative |
| A4QFQ3 | AVALGATAAIASPAQAAEVV | Negative |
| A4QFQ3 | NSNATRKAVAASAVALGATA | Negative |
| A4QFQ3 | AVAASAVALGATAAIASPAQ | Negative |
| A4QFQ3 | RKAVAASAVALGATAAIASP | Negative |
| A4QFQ3 | LGATAAIASPAQAAEVVVP  | Negative |
| A4QFQ3 | ASPAQAAEVVVPGTGISVDI | Negative |
| A4QFQ3 | NNSNATRKAVAASAVALGAT | Negative |
| A4QFQ3 | NATRKAVAASAVALGATAAI | Negative |
| A4QFQ3 | RRNNSNATRKAVAASAVALG | Negative |
| A4QFQ3 | IASPAQAAEVVVPGTGISVD | Negative |
| A4QFQ3 | VAASAVALGATAAIASPAQA | Negative |
| A4QFQ3 | GKHRRNNSNATRKAVAASAV | Negative |
| A4QFQ3 | RNNSNATRKAVAASAVALGA | Negative |
| A4QFQ3 | AASAVALGATAAIASPAQAA | Negative |
| A4QFQ3 | MGKHRRNNSNATRKAVAASA | Negative |
| A4QFQ3 | TRKAVAASAVALGATAAIAS | Negative |
| A4QFQ3 | HRRNNSNATRKAVAASAVAL | Negative |
| A4QFQ3 | SAVALGATAAIASPAQAAEV | Negative |
| A4QFQ3 | ATRKAVAASAVALGATAAIA | Negative |

|        |                      |          |
|--------|----------------------|----------|
| A4QFQ3 | KHRRNNSNATRKAVAASAVA | Negative |
| A5F7A4 | NATGDTEFDSPAKQGWMQDN | Negative |
| A5F7A4 | MATSSNAALFDYNATGDTEF | Negative |
| A5F7A4 | DYNATGDTEFDSPAKQGWMQ | Negative |
| A5F7A4 | FKNVKKTALMLAMFGMATSS | Negative |
| A5F7A4 | TALMLAMFGMATSSNAALFD | Negative |
| A5F7A4 | RFKNVKKTALMLAMFGMATS | Negative |
| A5F7A4 | LMLAMFGMATSSNAALFDYN | Negative |
| A5F7A4 | MLAMFGMATSSNAALFDYNA | Negative |
| A5F7A4 | ATSSNAALFDYNATGDTEFD | Negative |
| A5F7A4 | FGMATSSNAALFDYNATGDT | Negative |
| A5F7A4 | NAALFDYNATGDTEFDSPAK | Negative |
| A5F7A4 | NVKKTALMLAMFGMATSSNA | Negative |
| A5F7A4 | MFGMATSSNAALFDYNATGD | Negative |
| A5F7A4 | AALFDYNATGDTEFDSPAKQ | Negative |
| A5F7A4 | VKKTALMLAMFGMATSSNAA | Negative |
| A5F7A4 | KKTALMLAMFGMATSSNAAL | Negative |
| A5F7A4 | YNATGDTEFDSPAKQGWMQD | Negative |
| A5F7A4 | KTALMLAMFGMATSSNAALF | Negative |
| A5F7A4 | TSSNAALFDYNATGDTEFDS | Negative |
| A5F7A4 | SSNAALFDYNATGDTEFDSP | Negative |
| A5F7A4 | GMATSSNAALFDYNATGDTE | Negative |
| A5F7A4 | AMFGMATSSNAALFDYNATG | Negative |
| A5F7A4 | MRFKNVKKTALMLAMFGMAT | Negative |
| A5F7A4 | ALFDYNATGDTEFDSPAKQG | Negative |
| A5F7A4 | SNAALFDYNATGDTEFDSPA | Negative |
| A5F7A4 | LAMFGMATSSNAALFDYNAT | Negative |
| A5F7A4 | FDYNATGDTEFDSPAKQGWM | Negative |
| A5F7A4 | LFDYNATGDTEFDSPAKQGW | Negative |
| A5F7A4 | KNVKKTALMLAMFGMATSSN | Negative |
| A5HAK0 | HQCTAVVLLLLCASLSTYGQ | Negative |
| A5HAK0 | LLLLCASLSTYGQPAEIRRR | Negative |
| A5HAK0 | RYEHFLTQHVYGGITEQTCD | Negative |
| A5HAK0 | CTAVVLLLLCASLSTYGQPA | Negative |
| A5HAK0 | VVLLLLCASLSTYGQPAEIR | Negative |
| A5HAK0 | ASLSTYGQPAEIRRRYEHFL | Negative |
| A5HAK0 | IHQCTAVVLLLLCASLSTYG | Negative |
| A5HAK0 | IRRRYEHFLTQHVYGGITEQ | Negative |
| A5HAK0 | GIHQCTAVVLLLLCASLSTY | Negative |
| A5HAK0 | EIRRRYEHFLTQHVYGGITE | Negative |
| A5HAK0 | STYGQPAEIRRRYEHFLTQH | Negative |
| A5HAK0 | LCASLSTYGQPAEIRRRYEH | Negative |
| A5HAK0 | RRRYEHFLTQHVYGGITEQT | Negative |
| A5HAK0 | LSTYGQPAEIRRRYEHFLTQ | Negative |
| A5HAK0 | TYGQPAEIRRRYEHFLTQHV | Negative |
| A5HAK0 | TAVVLLLLCASLSTYGQPAE | Negative |



|        |                       |          |
|--------|-----------------------|----------|
| A5HAK0 | SLSTYGQPAEIRRRYEHFLT  | Negative |
| A5HAK0 | CASLSTYGQPAEIRRRYEHF  | Negative |
| A5HAK0 | VLLLLCASLSTYGQPAEIRR  | Negative |
| A5HAK0 | QPAEIRRRYEHFLTQHVVYGG | Negative |
| A5HAK0 | RRYEHFLTQHVVYGGITEQTC | Negative |
| A5HAK0 | YGQPAEIRRRYEHFLTQHVVY | Negative |
| A5HAK0 | LLLCASLSTYGQPAEIRRRY  | Negative |
| A5HAK0 | QCTAVVLLLLCASLSTYGQP  | Negative |
| A5HAK0 | GQPAEIRRRYEHFLTQHVVY  | Negative |
| A5HAK0 | MGIHQCTAVVLLLLCASLST  | Negative |
| A5HAK0 | PAEIRRRYEHFLTQHVVYGGI | Negative |
| A5HAK0 | LLCASLSTYGQPAEIRRRYE  | Negative |
| A5HAK0 | AEIRRRYEHFLTQHVVYGGIT | Negative |
| A6MEY4 | SLLGAANIPPQSLNLYQFKN  | Negative |
| A6MEY4 | LLGAANIPPQSLNLYQFKNM  | Negative |
| A6MEY4 | PAHLLVLLAVCVSLLGAANI  | Negative |
| A6MEY4 | QSLNLYQFKNMIQCAGTQLC  | Negative |
| A6MEY4 | NLYQFKNMIQCAGTQLCVAY  | Negative |
| A6MEY4 | ANIPPQSLNLYQFKNMIQCA  | Negative |
| A6MEY4 | VCVSLLGAANIPPQSLNLYQ  | Negative |
| A6MEY4 | LNLYQFKNMIQCAGTQLCVA  | Negative |
| A6MEY4 | LAVCVSLLGAANIPPQSLNL  | Negative |
| A6MEY4 | VSLLGAANIPPQSLNLYQFK  | Negative |
| A6MEY4 | LGAANIPPQSLNLYQFKNMI  | Negative |
| A6MEY4 | SLNLYQFKNMIQCAGTQLCV  | Negative |
| A6MEY4 | IPPQSLNLYQFKNMIQCAGT  | Negative |
| A6MEY4 | GAANIPPQSLNLYQFKNMIQ  | Negative |
| A6MEY4 | LYQFKNMIQCAGTQLCVAYV  | Negative |
| A6MEY4 | LLVLLAVCVSLLGAANIPPQ  | Negative |
| A6MEY4 | NPAHLLVLLAVCVSLLGAAN  | Negative |
| A6MEY4 | AHLLVLLAVCVSLLGAANIP  | Negative |
| A6MEY4 | LLAVCVSLLGAANIPPQSLN  | Negative |
| A6MEY4 | NIPPQSLNLYQFKNMIQCAG  | Negative |
| A6MEY4 | HLLVLLAVCVSLLGAANIPP  | Negative |
| A6MEY4 | PPQSLNLYQFKNMIQCAGTQ  | Negative |
| A6MEY4 | YQFKNMIQCAGTQLCVAYVK  | Negative |
| A6MEY4 | AVCVSLLGAANIPPQSLNLY  | Negative |
| A6MEY4 | PQSLNLYQFKNMIQCAGTQL  | Negative |
| A6MEY4 | MNPAHLLVLLAVCVSLLGAA  | Negative |
| A6MEY4 | VLLAVCVSLLGAANIPPQSL  | Negative |
| A6MEY4 | AANIPPQSLNLYQFKNMIQC  | Negative |
| A6MEY4 | LVLLAVCVSLLGAANIPPQS  | Negative |
| A6P6V9 | CSTFSFWFVCKIIFFFFSFN  | Negative |
| A6P6V9 | FFFFSFNIQTSIANPRENFL  | Negative |
| A6P6V9 | TSIANPRENFLKCFSQYIPN  | Negative |
| A6P6V9 | FFSFNIQTSIANPRENFLKC  | Negative |

|        |                      |          |
|--------|----------------------|----------|
| A6P6V9 | FVCKIIFFFFSFNIQTSIAN | Negative |
| A6P6V9 | QTSIANPRENFLKCFSQYIP | Negative |
| A6P6V9 | FFFSFNIQTSIANPRENFLK | Negative |
| A6P6V9 | SIANPRENFLKCFSQYIPNN | Negative |
| A6P6V9 | FWFVCKIIFFFFSFNIQTSI | Negative |
| A6P6V9 | IANPRENFLKCFSQYIPNNA | Negative |
| A6P6V9 | TFSFWFVCKIIFFFFSFNIQ | Negative |
| A6P6V9 | MKCSTFSFWFVCKIIFFFFS | Negative |
| A6P6V9 | VCKIIFFFFSFNIQTSIANP | Negative |
| A6P6V9 | CKIIFFFFSFNIQTSIANPR | Negative |
| A6P6V9 | KCSTFSFWFVCKIIFFFFSF | Negative |
| A6P6V9 | FSFWFVCKIIFFFFSFNIQT | Negative |
| A6P6V9 | SFWFVCKIIFFFFSFNIQTS | Negative |
| A6P6V9 | STFSFWFVCKIIFFFFSFNI | Negative |
| A6P6V9 | NPRENFLKCFSQYIPNNATN | Negative |
| A6P6V9 | FSFNIQTSIANPRENFLKCF | Negative |
| A6P6V9 | SFNIQTSIANPRENFLKCFS | Negative |
| A6P6V9 | ANPRENFLKCFSQYIPNNAT | Negative |
| A6P6V9 | KIIFFFFSFNIQTSIANPRE | Negative |
| A6P6V9 | NIQTSIANPRENFLKCFSQY | Negative |
| A6P6V9 | IFFFSFNIQTSIANPRENF  | Negative |
| A6P6V9 | PRENFLKCFSQYIPNNATNL | Negative |
| A6P6V9 | WFVCKIIFFFFSFNIQTSIA | Negative |
| A6P6V9 | IQTSIANPRENFLKCFSQYI | Negative |
| A6P6V9 | FNIQTSIANPRENFLKCFSQ | Negative |
| A6QIG7 | HHHSAKAFTFEPFPTNEEIE | Negative |
| A6QIG7 | TTVLALSFLTAGISTHHHSA | Negative |
| A6QIG7 | AKAFTFEPFPTNEEIESNKK | Negative |
| A6QIG7 | KLATTVLALSFLTAGISTHH | Negative |
| A6QIG7 | AGISTHHHSAKAFTFEPFPT | Negative |
| A6QIG7 | KAFTFEPFPTNEEIESNKKM | Negative |
| A6QIG7 | SFLTAGISTHHHSAKAFTFE | Negative |
| A6QIG7 | LATTVLALSFLTAGISTHHH | Negative |
| A6QIG7 | GISTHHHSAKAFTFEPFPTN | Negative |
| A6QIG7 | LSFLTAGISTHHHSAKAFTF | Negative |
| A6QIG7 | KKLATTVLALSFLTAGISTH | Negative |
| A6QIG7 | HHSAKAFTFEPFPTNEEIES | Negative |
| A6QIG7 | HSKAFTFEPFPTNEEIESN  | Negative |
| A6QIG7 | THHSAKAFTFEPFPTNEEI  | Negative |
| A6QIG7 | KKKLATTVLALSFLTAGIST | Negative |
| A6QIG7 | VLALSFLTAGISTHHHSAKA | Negative |
| A6QIG7 | TVLALSFLTAGISTHHHSAK | Negative |
| A6QIG7 | TAGISTHHHSAKAFTFEPFP | Negative |
| A6QIG7 | TFEPFPTNEEIESNKKMLEK | Negative |
| A6QIG7 | ALSFLTAGISTHHHSAKAFT | Negative |
| A6QIG7 | LALSFLTAGISTHHHSAKAF | Negative |

|        |                       |          |
|--------|-----------------------|----------|
| A6QIG7 | AFTFEPFPTNEEIESNKKML  | Negative |
| A6QIG7 | STHHHSAKAFTFEPFPTNEE  | Negative |
| A6QIG7 | MKKKLATTVLALSFLTAGIS  | Negative |
| A6QIG7 | LTAGISTHHHSAKAFTFEPF  | Negative |
| A6QIG7 | SAKAFTFEPFPTNEEIESNK  | Negative |
| A6QIG7 | FTFEPFPTNEEIESNKKMLE  | Negative |
| A6QIG7 | ISTHHHSAKAFTFEPFPTNE  | Negative |
| A6QIG7 | ATTVLALSFLTAGISTHHHS  | Negative |
| A7L035 | ESTISSGLNSLKTAKIDAKMP | Negative |
| A7L035 | VKMLFFAFLPLLFMGTGIAAE | Negative |
| A7L035 | IAAESTISSGLNSLKTAKIDA | Negative |
| A7L035 | SGLNSLKTAKIDAKMPSGKQL | Negative |
| A7L035 | MTGIAAESTISSGLNSLKTAK | Negative |
| A7L035 | SLKTAKIDAKMPSGKQLFDKV | Negative |
| A7L035 | ISSGLNSLKTAKIDAKMPSGK | Negative |
| A7L035 | STISSGLNSLKTAKIDAKMPS | Negative |
| A7L035 | GIAAESTISSGLNSLKTAKID | Negative |
| A7L035 | LNSLKTAKIDAKMPSGKQLFD | Negative |
| A7L035 | MVKMLFFAFLPLLFMGTGIAA | Negative |
| A7L035 | SSGLNSLKTAKIDAKMPSGKQ | Negative |
| A7L035 | AESTISSGLNSLKTAKIDAKM | Negative |
| A7L035 | LPLLFMGTGIAAESTISSGLN | Negative |
| A7L035 | PLLFMGTGIAAESTISSGLNS | Negative |
| A7L035 | KMLFFAFLPLLFMGTGIAAES | Negative |
| A7L035 | LFMTGIAAESTISSGLNSLK  | Negative |
| A7L035 | MLFFAFLPLLFMGTGIAAEST | Negative |
| A7L035 | LLFMGTGIAAESTISSGLNSL | Negative |
| A7L035 | TISSGLNSLKTAKIDAKMPSG | Negative |
| A7L035 | NSLKTAKIDAKMPSGKQLFDK | Negative |
| A7L035 | TGIAAESTISSGLNSLKTAKI | Negative |
| A7L035 | AFLPLLFMGTGIAAESTISSG | Negative |
| A7L035 | FAFLPLLFMGTGIAAESTISS | Negative |
| A7L035 | FLPLLFMGTGIAAESTISSGL | Negative |
| A7L035 | GLNSLKTAKIDAKMPSGKQLF | Negative |
| A7L035 | AAESTISSGLNSLKTAKIDAK | Negative |
| A7L035 | LFFAFLPLLFMGTGIAAESTI | Negative |
| A7L035 | FMTGIAAESTISSGLNSLKT  | Negative |
| A7L036 | ISSGLASLKAKIDIKKPTGK  | Negative |
| A7L036 | TISSGLASLKAKIDIKKPTG  | Negative |
| A7L036 | MILVSLPLLFMGTGIASEST  | Negative |
| A7L036 | PLLFMGTGIASESTISSGLAS | Negative |
| A7L036 | STISSGLASLKAKIDIKKPT  | Negative |
| A7L036 | GIASESTISSGLASLKAKID  | Negative |
| A7L036 | KAKIDIKKPTGKQLFDKVK   | Negative |
| A7L036 | LASLKAKIDIKKPTGKQLFD  | Negative |
| A7L036 | LKAKIDIKKPTGKQLFDKVK  | Negative |

|        |                       |          |
|--------|-----------------------|----------|
| A7L036 | GLASLKAKIDIKKPTGKQLF  | Negative |
| A7L036 | FMTGIASESTISSGLASLKA  | Negative |
| A7L036 | ASLKAKIDIKKPTGKQLFDK  | Negative |
| A7L036 | SLKAKIDIKKPTGKQLFDKV  | Negative |
| A7L036 | LFMTGIASESTISSGLASLK  | Negative |
| A7L036 | SSGLASLKAKIDIKKPTGKQ  | Negative |
| A7L036 | ESTISSGLASLKAKIDIKKP  | Negative |
| A7L036 | SLLPLL FMTGIASESTISSG | Negative |
| A7L036 | LPLL FMTGIASESTISSGLA | Negative |
| A7L036 | LLPLL FMTGIASESTISSGL | Negative |
| A7L036 | ASESTISSGLASLKAKIDIK  | Negative |
| A7L036 | SESTISSGLASLKAKIDIKK  | Negative |
| A7L036 | TGIASESTISSGLASLKAKI  | Negative |
| A7L036 | MTGIASESTISSGLASLKAK  | Negative |
| A7L036 | LLFMTGIASESTISSGLASL  | Negative |
| A7L036 | IASESTISSGLASLKAKIDI  | Negative |
| A7L036 | VSLLPLL FMTGIASESTISS | Negative |
| A7L036 | SGLASLKAKIDIKKPTGKQL  | Negative |
| A7L036 | AKIDIKKPTGKQLFDKV KSM | Negative |
| A7L036 | ILVSLLPLL FMTGIASESTI | Negative |
| A7VN13 | MRVFFSLIIFSFTLATCQGV  | Negative |
| A7VN13 | FFSLIIFSFTLATCQGV CAP | Negative |
| A7VN13 | CQGV CAPRPEHIDGEVATRI | Negative |
| A7VN13 | DGEVATRICVDPNDRRKHLV  | Negative |
| A7VN13 | TCQGV CAPRPEHIDGEVATR | Negative |
| A7VN13 | PRPEHIDGEVATRICVDPND  | Negative |
| A7VN13 | IFSFTLATCQGV CAPRPEHI | Negative |
| A7VN13 | APRPEHIDGEVATRICVDPN  | Negative |
| A7VN13 | IDGEVATRICVDPNDRRKHL  | Negative |
| A7VN13 | FTLATCQGV CAPRPEHIDGE | Negative |
| A7VN13 | VFFSLIIFSFTLATCQGVCA  | Negative |
| A7VN13 | TLATCQGV CAPRPEHIDGEV | Negative |
| A7VN13 | GVCAPRPEHIDGEVATRICV  | Negative |
| A7VN13 | PEHIDGEVATRICVDPNDRR  | Negative |
| A7VN13 | RVFFSLIIFSFTLATCQGVC  | Negative |
| A7VN13 | EHIDGEVATRICVDPNDRRK  | Negative |
| A7VN13 | LIIFSFTLATCQGV CAPRPE | Negative |
| A7VN13 | IIFSFTLATCQGV CAPRPEH | Negative |
| A7VN13 | ATCQGV CAPRPEHIDGEVAT | Negative |
| A7VN13 | SFTLATCQGV CAPRPEHIDG | Negative |
| A7VN13 | CAPRPEHIDGEVATRICVDP  | Negative |
| A7VN13 | QGV CAPRPEHIDGEVATRIC | Negative |
| A7VN13 | HIDGEVATRICVDPNDRRKH  | Negative |
| A7VN13 | SLIIFSFTLATCQGV CAPRP | Negative |
| A7VN13 | GEVATRICVDPNDRRKHLVV  | Negative |
| A7VN13 | FSFTLATCQGV CAPRPEHID | Negative |

|        |                      |          |
|--------|----------------------|----------|
| A7VN13 | LATCQGVCAPRPEHIDGEVA | Negative |
| A7VN13 | VCAPRPEHIDGEVATRICVD | Negative |
| A7VN13 | RPEHIDGEVATRICVDPNDR | Negative |
| A7VN14 | GACGIGPLVSSPTDAMAPKK | Negative |
| A7VN14 | MLATCQGACGIGPLVSSPTD | Negative |
| A7VN14 | LATCQGACGIGPLVSSPTDA | Negative |
| A7VN14 | FFSLIIFSFMLATCQGACGI | Negative |
| A7VN14 | SPTDAMAPKKCVDPNDRRKH | Negative |
| A7VN14 | VSSPTDAMAPKKCVDPNDRR | Negative |
| A7VN14 | TCQGACGIGPLVSSPTDAMA | Negative |
| A7VN14 | CQGACGIGPLVSSPTDAMAP | Negative |
| A7VN14 | LVSSPTDAMAPKKCVDPNDR | Negative |
| A7VN14 | PLVSSPTDAMAPKKCVDPND | Negative |
| A7VN14 | PTDAMAPKKCVDPNDRRKHL | Negative |
| A7VN14 | MRVFFSLIIFSFMLATCQGA | Negative |
| A7VN14 | ACGIGPLVSSPTDAMAPKKC | Negative |
| A7VN14 | LIIFSFMLATCQGACGIGPL | Negative |
| A7VN14 | IIFSFMLATCQGACGIGPLV | Negative |
| A7VN14 | SFMLATCQGACGIGPLVSSP | Negative |
| A7VN14 | GIGPLVSSPTDAMAPKKCVD | Negative |
| A7VN14 | IGPLVSSPTDAMAPKKCVDP | Negative |
| A7VN14 | IFSFMLATCQGACGIGPLVS | Negative |
| A7VN14 | RVFFSLIIFSFMLATCQGAC | Negative |
| A7VN14 | ATCQGACGIGPLVSSPTDAM | Negative |
| A7VN14 | SLIIFSFMLATCQGACGIGP | Negative |
| A7VN14 | SSPTDAMAPKKCVDPNDRRK | Negative |
| A7VN14 | VFFSLIIFSFMLATCQGACG | Negative |
| A7VN14 | GPLVSSPTDAMAPKKCVDPN | Negative |
| A7VN14 | CGIGPLVSSPTDAMAPKKCV | Negative |
| A7VN14 | FSFMLATCQGACGIGPLVSS | Negative |
| A7VN14 | FMLATCQGACGIGPLVSSPT | Negative |
| A7VN14 | QGACGIGPLVSSPTDAMAPK | Negative |
| A7VN15 | FSFTLATCQGEYGSVPLPI  | Negative |
| A7VN15 | TCQGEYGSVPLPIDGEDVP  | Negative |
| A7VN15 | CQGEYGSVPLPIDGEDVPL  | Negative |
| A7VN15 | ATCQGEYGSVPLPIDGEDV  | Negative |
| A7VN15 | FFILIIFSFTLATCQGEYGY | Negative |
| A7VN15 | ILIIFSFTLATCQGEYGSV  | Negative |
| A7VN15 | MKVFFILIIFSFTLATCQGE | Negative |
| A7VN15 | CYGSVPLPIDGEDVPLRTC  | Negative |
| A7VN15 | IIFSFTLATCQGEYGSVPL  | Negative |
| A7VN15 | ECYGSVPLPIDGEDVPLRTC | Negative |
| A7VN15 | TLATCQGEYGSVPLPIDGE  | Negative |
| A7VN15 | GECYGSVPLPIDGEDVPLRT | Negative |
| A7VN15 | VFFILIIFSFTLATCQGEY  | Negative |
| A7VN15 | YGSVPLPIDGEDVPLRTCVD | Negative |

|        |                       |          |
|--------|-----------------------|----------|
| A7VN15 | VPLPIDGEDVPLRTCVDTHD  | Negative |
| A7VN15 | IFSFTLATCQGECYGSVPLP  | Negative |
| A7VN15 | LPIDGEDVPLRTCVDTHDGQ  | Negative |
| A7VN15 | LIIFSFTLATCQGECYGSVP  | Negative |
| A7VN15 | IDGEDVPLRTCVDTHDGQKH  | Negative |
| A7VN15 | FTLATCQGECYGSVPLPIDG  | Negative |
| A7VN15 | SVPLPIDGEDVPLRTCVDTH  | Negative |
| A7VN15 | GSVPLPIDGEDVPLRTCVDT  | Negative |
| A7VN15 | QGECYGSVPLPIDGEDVPLR  | Negative |
| A7VN15 | PIDGEDVPLRTCVDTHDGQK  | Negative |
| A7VN15 | KVFFILIIFSFTLATCQGE   | Negative |
| A7VN15 | LATCQGECYGSVPLPIDGED  | Negative |
| A7VN15 | PLPIDGEDVPLRTCVDTHDG  | Negative |
| A7VN15 | SFTLATCQGECYGSVPLPID  | Negative |
| A7VN15 | DGEDVPLRTCVDTHDGQKHL  | Negative |
| A8CG78 | GEMINQKTGNFGLLSYVYYG  | Negative |
| A8CG78 | GNLYQFGEMINQKTGNFGLL  | Negative |
| A8CG78 | LWIVAVCLIGVEGNLYQFGE  | Negative |
| A8CG78 | LYQFGEMINQKTGNFGLLSY  | Negative |
| A8CG78 | MRTLWIVAVCLIGVEGNLYQ  | Negative |
| A8CG78 | NQKTGNFGLLSYVYYGICYCG | Negative |
| A8CG78 | IVAVCLIGVEGNLYQFGEMI  | Negative |
| A8CG78 | VCLIGVEGNLYQFGEMINQK  | Negative |
| A8CG78 | INQKTGNFGLLSYVYYGICYC | Negative |
| A8CG78 | WIVAVCLIGVEGNLYQFGEM  | Negative |
| A8CG78 | QKTGNFGLLSYVYYGICYCGW | Negative |
| A8CG78 | EMINQKTGNFGLLSYVYYGC  | Negative |
| A8CG78 | EGNLYQFGEMINQKTGNFGL  | Negative |
| A8CG78 | AVCLIGVEGNLYQFGEMINQ  | Negative |
| A8CG78 | TLWIVAVCLIGVEGNLYQFG  | Negative |
| A8CG78 | KTGNFGLLSYVYYGICYCGWG | Negative |
| A8CG78 | YQFGEMINQKTGNFGLLSYV  | Negative |
| A8CG78 | LIGVEGNLYQFGEMINQKTG  | Negative |
| A8CG78 | QFGEMINQKTGNFGLLSYVY  | Negative |
| A8CG78 | GVEGNLYQFGEMINQKTGNF  | Negative |
| A8CG78 | IGVEGNLYQFGEMINQKTGN  | Negative |
| A8CG78 | MINQKTGNFGLLSYVYYGCY  | Negative |
| A8CG78 | TGNFGLLSYVYYGICYCGWGG | Negative |
| A8CG78 | GNFGLLSYVYYGICYCGWGGK | Negative |
| A8CG78 | VEGNLYQFGEMINQKTGNFG  | Negative |
| A8CG78 | CLIGVEGNLYQFGEMINQKT  | Negative |
| A8CG78 | NLYQFGEMINQKTGNFGLLS  | Negative |
| A8CG78 | FGEMINQKTGNFGLLSYVYY  | Negative |
| A8CG78 | VAVCLIGVEGNLYQFGEMIN  | Negative |
| A8CG86 | GNLFQFAEMIVKMTGKEAVH  | Negative |
| A8CG86 | NLFQFAEMIVKMTGKEAVHS  | Negative |

|        |                      |          |
|--------|----------------------|----------|
| A8CG86 | IVAVCLIGVEGNLFQFAEMI | Negative |
| A8CG86 | WIVAVCLIGVEGNLFQFAEM | Negative |
| A8CG86 | LIGVEGNLFQFAEMIVKMTG | Negative |
| A8CG86 | FQFAEMIVKMTGKEAVHSYA | Negative |
| A8CG86 | VAVCLIGVEGNLFQFAEMIV | Negative |
| A8CG86 | GVEGNLFQFAEMIVKMTGKE | Negative |
| A8CG86 | GKEAVHSYAIYGCYCGWGGQ | Negative |
| A8CG86 | EGNLFQFAEMIVKMTGKEAV | Negative |
| A8CG86 | IVKMTGKEAVHSYAIYGCYC | Negative |
| A8CG86 | KMTGKEAVHSYAIYGCYCGW | Negative |
| A8CG86 | VKMTGKEAVHSYAIYGCYCG | Negative |
| A8CG86 | MRTLWIVAVCLIGVEGNLFQ | Negative |
| A8CG86 | TGKEAVHSYAIYGCYCGWGG | Negative |
| A8CG86 | MTGKEAVHSYAIYGCYCGWG | Negative |
| A8CG86 | LWIVAVCLIGVEGNLFQFAE | Negative |
| A8CG86 | EMIVKMTGKEAVHSYAIYGC | Negative |
| A8CG86 | MIVKMTGKEAVHSYAIYGCY | Negative |
| A8CG86 | TLWIVAVCLIGVEGNLFQFA | Negative |
| A8CG86 | VCLIGVEGNLFQFAEMIVKM | Negative |
| A8CG86 | VEGNLFQFAEMIVKMTGKEA | Negative |
| A8CG86 | CLIGVEGNLFQFAEMIVKMT | Negative |
| A8CG86 | AVCLIGVEGNLFQFAEMIVK | Negative |
| A8CG86 | LFQFAEMIVKMTGKEAVHSY | Negative |
| A8CG86 | IGVEGNLFQFAEMIVKMTGK | Negative |
| A8CG86 | AEMIVKMTGKEAVHSYAIYG | Negative |
| A8CG86 | QFAEMIVKMTGKEAVHSYAI | Negative |
| A8CG86 | FAEMIVKMTGKEAVHSYAIY | Negative |
| A8CG89 | CLIGVEGNLFQFARMIDAKQ | Negative |
| A8CG89 | EGNLFQFARMIDAKQEAFSF | Negative |
| A8CG89 | QEAFSFFKYISYGCYCGWGG | Negative |
| A8CG89 | WIVAMCLIGVEGNLFQFARM | Negative |
| A8CG89 | QFARMIDAKQEAFSFFKYIS | Negative |
| A8CG89 | AKQEAFSFFKYISYGCYCGW | Negative |
| A8CG89 | ARMIDAKQEAFSFFKYISYG | Negative |
| A8CG89 | TLWIVAMCLIGVEGNLFQFA | Negative |
| A8CG89 | NLFQFARMIDAKQEAFSFFK | Negative |
| A8CG89 | IGVEGNLFQFARMIDAKQEA | Negative |
| A8CG89 | KQEAFSFFKYISYGCYCGWG | Negative |
| A8CG89 | EAFSFFKYISYGCYCGWGGQ | Negative |
| A8CG89 | IDAKQEAFSFFKYISYGCYC | Negative |
| A8CG89 | LIGVEGNLFQFARMIDAKQE | Negative |
| A8CG89 | MRTLWIVAMCLIGVEGNLFQ | Negative |
| A8CG89 | GNLFQFARMIDAKQEAFSFF | Negative |
| A8CG89 | IVAMCLIGVEGNLFQFARM  | Negative |
| A8CG89 | FARMIDAKQEAFSFFKYISY | Negative |
| A8CG89 | GVEGNLFQFARMIDAKQEA  | Negative |

|        |                      |          |
|--------|----------------------|----------|
| A8CG89 | MIDAKQEAFSFFKYISYGCY | Negative |
| A8CG89 | VAMCLIGVEGNLFQFARMID | Negative |
| A8CG89 | MCLIGVEGNLFQFARMIDAK | Negative |
| A8CG89 | LWIVAMCLIGVEGNLFQFAR | Negative |
| A8CG89 | AMCLIGVEGNLFQFARMIDA | Negative |
| A8CG89 | RMIDAKQEAFSFFKYISYGC | Negative |
| A8CG89 | DAKQEAFSFFKYISYGCYCG | Negative |
| A8CG89 | VEGNLFQFARMIDAKQEAFS | Negative |
| A8CG89 | FQFARMIDAKQEAFSFFKYI | Negative |
| A8CG89 | LFQFARMIDAKQEAFSFFKY | Negative |
| A8CG90 | VCLIGVEGNLLQFGRMIFRM | Negative |
| A8CG90 | GNLLQFGRMIFRMTAKNPLS | Negative |
| A8CG90 | FRMTAKNPLSSYSNYGCYCG | Negative |
| A8CG90 | MTAKNPLSSYSNYGCYCGWG | Negative |
| A8CG90 | QFGRMIFRMTAKNPLSSYSN | Negative |
| A8CG90 | VAVCLIGVEGNLLQFGRMIF | Negative |
| A8CG90 | VEGNLLQFGRMIFRMTAKNP | Negative |
| A8CG90 | TAKNPLSSYSNYGCYCGWGG | Negative |
| A8CG90 | GRMIFRMTAKNPLSSYSNYG | Negative |
| A8CG90 | LLQFGRMIFRMTAKNPLSSY | Negative |
| A8CG90 | NLLQFGRMIFRMTAKNPLSS | Negative |
| A8CG90 | EGNLLQFGRMIFRMTAKNPL | Negative |
| A8CG90 | IFRMTAKNPLSSYSNYGCYC | Negative |
| A8CG90 | AKNPLSSYSNYGCYCGWGGK | Negative |
| A8CG90 | RMTAKNPLSSYSNYGCYCGW | Negative |
| A8CG90 | AVCLIGVEGNLLQFGRMIFR | Negative |
| A8CG90 | IGVEGNLLQFGRMIFRMTAK | Negative |
| A8CG90 | WIVAVCLIGVEGNLLQFGRM | Negative |
| A8CG90 | RMIFRMTAKNPLSSYSNYGC | Negative |
| A8CG90 | TLWIVAVCLIGVEGNLLQFG | Negative |
| A8CG90 | IVAVCLIGVEGNLLQFGRMI | Negative |
| A8CG90 | LWIVAVCLIGVEGNLLQFGR | Negative |
| A8CG90 | LQFGRMIFRMTAKNPLSSYS | Negative |
| A8CG90 | LIGVEGNLLQFGRMIFRMTA | Negative |
| A8CG90 | CLIGVEGNLLQFGRMIFRMT | Negative |
| A8CG90 | GVEGNLLQFGRMIFRMTAKN | Negative |
| A8CG90 | MRTLWIVAVCLIGVEGNLLQ | Negative |
| A8CG90 | FGRMIFRMTAKNPLSSYSNY | Negative |
| A8CG90 | MIFRMTAKNPLSSYSNYGCY | Negative |
| A8CL69 | AVFSSFNRTTIFVCVLLCV  | Negative |
| A8CL69 | VCVLLCVVYLLSYASGEYDG | Negative |
| A8CL69 | VFSSFNRTTIFVCVLLCVV  | Negative |
| A8CL69 | CVVYLLSYASGEYDGRDSSS | Negative |
| A8CL69 | GFAVFSSFNRTTIFVCVLL  | Negative |
| A8CL69 | LLSYASGEYDGRDSSSGSNN | Negative |
| A8CL69 | FNRFTTIFVCVLLCVVYLLS | Negative |



|        |                       |          |
|--------|-----------------------|----------|
| A8CL69 | YASGEYDGRDSSSGSNNDRA  | Negative |
| A8CL69 | VLLCVVYLLSYASGEYDGRD  | Negative |
| A8CL69 | IGFAVFSSFNRTTIFVCVL   | Negative |
| A8CL69 | TIFVCVLLCVVYLLSYASGE  | Negative |
| A8CL69 | VYLLSYASGEYDGRDSSSGS  | Negative |
| A8CL69 | LLCVVYLLSYASGEYDGRDS  | Negative |
| A8CL69 | TTIFVCVLLCVVYLLSYASG  | Negative |
| A8CL69 | FAVFSSFNRTTIFVCVLLC   | Negative |
| A8CL69 | FTTIFVCVLLCVVYLLSYAS  | Negative |
| A8CL69 | SYASGEYDGRDSSSGSNNDR  | Negative |
| A8CL69 | FSSFNRTTIFVCVLLCVVY   | Negative |
| A8CL69 | SFNRTTIFVCVLLCVVYLL   | Negative |
| A8CL69 | YLLSYASGEYDGRDSSSGSN  | Negative |
| A8CL69 | IFVCVLLCVVYLLSYASGEY  | Negative |
| A8CL69 | NRFTTIFVCVLLCVVYLLSY  | Negative |
| A8CL69 | RFTTIFVCVLLCVVYLLSYA  | Negative |
| A8CL69 | MIGFAVFSSFNRTTIFVCV   | Negative |
| A8CL69 | LSYASGEYDGRDSSSGSNND  | Negative |
| A8CL69 | LCVVYLLSYASGEYDGRDSS  | Negative |
| A8CL69 | SSFNRFTTIFVCVLLCVVYL  | Negative |
| A8CL69 | VVYLLSYASGEYDGRDSSSG  | Negative |
| A8CL69 | FVCVLLCVVYLLSYASGEYD  | Negative |
| A8E2V8 | VLLLGVEGSLMQFEMPLIMKL | Negative |
| A8E2V8 | LLLGVEGSLMQFEMPLIMKLA | Negative |
| A8E2V8 | MRTLWIMAVLLLGVEGSLMQ  | Negative |
| A8E2V8 | EGSLMQFEMPLIMKLAKSSGM | Negative |
| A8E2V8 | IMAVLLLGVEGSLMQFEMLI  | Negative |
| A8E2V8 | WIMAVLLLGVEGSLMQFEML  | Negative |
| A8E2V8 | LMQFEMPLIMKLAKSSGMFWY | Negative |
| A8E2V8 | MKLAKSSGMFWYSAYGCYCG  | Negative |
| A8E2V8 | FEMPLIMKLAKSSGMFWYSAY | Negative |
| A8E2V8 | GVEGSLMQFEMPLIMKLAKSS | Negative |
| A8E2V8 | AVLLLGVEGSLMQFEMPLIMK | Negative |
| A8E2V8 | LGVEGSLMQFEMPLIMKLAKS | Negative |
| A8E2V8 | LLGVEGSLMQFEMPLIMKLAK | Negative |
| A8E2V8 | VEGSLMQFEMPLIMKLAKSSG | Negative |
| A8E2V8 | MLIMKLAKSSGMFWYSAYGC  | Negative |
| A8E2V8 | LWIMAVLLLGVEGSLMQFEM  | Negative |
| A8E2V8 | LAKSSGMFWYSAYGCYCGWG  | Negative |
| A8E2V8 | IMKLAKSSGMFWYSAYGCYC  | Negative |
| A8E2V8 | KLAKSSGMFWYSAYGCYCGW  | Negative |
| A8E2V8 | SLMQFEMPLIMKLAKSSGMFW | Negative |
| A8E2V8 | EMLIMKLAKSSGMFWYSAYG  | Negative |
| A8E2V8 | TLWIMAVLLLGVEGSLMQFE  | Negative |
| A8E2V8 | LIMKLAKSSGMFWYSAYGCY  | Negative |
| A8E2V8 | GSLMQFEMPLIMKLAKSSGMF | Negative |

|        |                       |          |
|--------|-----------------------|----------|
| A8E2V8 | AKSSGMFWYSAYGICYCGWGG | Negative |
| A8E2V8 | MAVLLLGVEGSLMQFEMPLIM | Negative |
| A8E2V8 | MQFEMPLIMKLAKSSGMFWYS | Negative |
| A8E2V8 | KSSGMFWYSAYGICYCGWGGQ | Negative |
| A8E2V8 | QFEMPLIMKLAKSSGMFWYSA | Negative |
| A8QL52 | FREADYEEFLEIARNGLKKT  | Negative |
| A8QL52 | ALEECFREADYEEFLEIARN  | Negative |
| A8QL52 | LEECFREADYEEFLEIARNG  | Negative |
| A8QL52 | DRRSALEECFREADYEEFLE  | Negative |
| A8QL52 | FSLVFLAAFGSCADDRRSAL  | Negative |
| A8QL52 | ADDRRSALEECFREADYEEF  | Negative |
| A8QL52 | NVFSIFSLVFLAAFGSCADD  | Negative |
| A8QL52 | GSCADDRRSALEECFREADY  | Negative |
| A8QL52 | LAAFGSCADDRRSALEECFR  | Negative |
| A8QL52 | SCADDRRSALEECFREADYE  | Negative |
| A8QL52 | ECFREADYEEFLEIARNGLK  | Negative |
| A8QL52 | AAFGSCADDRRSALEECFRE  | Negative |
| A8QL52 | RRSALEECFREADYEEFLEI  | Negative |
| A8QL52 | DDRRSALEECFREADYEEFL  | Negative |
| A8QL52 | FLAAFGSCADDRRSALEECF  | Negative |
| A8QL52 | CFREADYEEFLEIARNGLKK  | Negative |
| A8QL52 | AFGSCADDRRSALEECFREA  | Negative |
| A8QL52 | VFLAAFGSCADDRRSALEEC  | Negative |
| A8QL52 | CADDRRSALEECFREADYEE  | Negative |
| A8QL52 | LVFLAAFGSCADDRRSALEE  | Negative |
| A8QL52 | IFSLVFLAAFGSCADDRRSA  | Negative |
| A8QL52 | RSALEECFREADYEEFLEIA  | Negative |
| A8QL52 | SLVFLAAFGSCADDRRSALE  | Negative |
| A8QL52 | SALEECFREADYEEFLEIAR  | Negative |
| A8QL52 | MNVFSIFSLVFLAAFGSCAD  | Negative |
| A8QL52 | VFSIFSLVFLAAFGSCADDR  | Negative |
| A8QL52 | FGSCADDRRSALEECFREAD  | Negative |
| A8QL52 | FSIFSLVFLAAFGSCADDR   | Negative |
| A8QL52 | EECFREADYEEFLEIARNGL  | Negative |
| A8QL58 | FQQNDYEEILEIARNGLKKT  | Negative |
| A8QL58 | ALESCADDRRSPLEECFQQN  | Negative |
| A8QL58 | CFQQNDYEEILEIARNGLKK  | Negative |
| A8QL58 | CADDRRSPLEECFQQNDYEE  | Negative |
| A8QL58 | EECFQQNDYEEILEIARNGL  | Negative |
| A8QL58 | SLLFLAALESCADDRRSPLE  | Negative |
| A8QL58 | NVLFIFSLFLAALESCADD   | Negative |
| A8QL58 | RRSPLEECFQQNDYEEILEI  | Negative |
| A8QL58 | LAALESCADDRRSPLEECFQ  | Negative |
| A8QL58 | AALESCADDRRSPLEECFQQ  | Negative |
| A8QL58 | SCADDRRSPLEECFQQNDYE  | Negative |
| A8QL58 | LEECFQQNDYEEILEIARNG  | Negative |

|        |                       |          |
|--------|-----------------------|----------|
| A8QL58 | FLAALESCADDRSPLEECF   | Negative |
| A8QL58 | LFIFSLFLAALESCADDR    | Negative |
| A8QL58 | VLIFSLFLAALESCADDR    | Negative |
| A8QL58 | IFSLFLAALESCADDRSP    | Negative |
| A8QL58 | ADDRSPLEECFQQNDYEEI   | Negative |
| A8QL58 | LLFLAALESCADDRSPLEE   | Negative |
| A8QL58 | DDRRSPLEECFQQNDYEEIL  | Negative |
| A8QL58 | LESCADDRSPLEECFQQND   | Negative |
| A8QL58 | DRRSPLEECFQQNDYEEILE  | Negative |
| A8QL58 | ESCADDRSPLEECFQQNDY   | Negative |
| A8QL58 | LFLAALESCADDRSPLEEC   | Negative |
| A8QL58 | FSLFLAALESCADDRSP     | Negative |
| A8QL58 | ECFQQNDYEEILEIARNGLK  | Negative |
| A8QL58 | MNVLFIFSLFLAALESCAD   | Negative |
| A8QL58 | PLEECFQQNDYEEILEIARN  | Negative |
| A8QL58 | SPLEECFQQNDYEEILEIAR  | Negative |
| A8QL58 | RSPLEECFQQNDYEEILEIA  | Negative |
| A8Y7P1 | GGLLLLGLLTLWAELTPIS   | Negative |
| A8Y7P1 | ISGHDRPKFCYLPADPGECL  | Negative |
| A8Y7P1 | WAELTPISGHDRPKFCYLP   | Negative |
| A8Y7P1 | TLWAELTPISGHDRPKFCYL  | Negative |
| A8Y7P1 | PISGHDRPKFCYLPADPGECL | Negative |
| A8Y7P1 | SGGLLLLGLLTLWAELTPI   | Negative |
| A8Y7P1 | SGHDRPKFCYLPADPGECLA  | Negative |
| A8Y7P1 | KFCYLPADPGECLAHMRSFY  | Negative |
| A8Y7P1 | GLLTLWAELTPISGHDRPKF  | Negative |
| A8Y7P1 | LLLGLLTLWAELTPISGHD   | Negative |
| A8Y7P1 | SSGGLLLLGLLTLWAELTP   | Negative |
| A8Y7P1 | LLTLWAELTPISGHDRPKFC  | Negative |
| A8Y7P1 | LLLLLGLLTLWAELTPISGH  | Negative |
| A8Y7P1 | FCYLPADPGECLAHMRSFY   | Negative |
| A8Y7P1 | AELTPISGHDRPKFCYLPAD  | Negative |
| A8Y7P1 | GLLLLGLLTLWAELTPISG   | Negative |
| A8Y7P1 | LLGLLTLWAELTPISGHDR   | Negative |
| A8Y7P1 | LWAELTPISGHDRPKFCYLP  | Negative |
| A8Y7P1 | MSSGGLLLLGLLTLWAELT   | Negative |
| A8Y7P1 | GHDRPKFCYLPADPGECLAH  | Negative |
| A8Y7P1 | HDRPKFCYLPADPGECLAHM  | Negative |
| A8Y7P1 | RPKFCYLPADPGECLAHMRS  | Negative |
| A8Y7P1 | LTPISGHDRPKFCYLPADPG  | Negative |
| A8Y7P1 | ELTPISGHDRPKFCYLPADP  | Negative |
| A8Y7P1 | LTLWAELTPISGHDRPKFCY  | Negative |
| A8Y7P1 | TPISGHDRPKFCYLPADPGE  | Negative |
| A8Y7P1 | PKFCYLPADPGECLAHMRSF  | Negative |
| A8Y7P1 | LLGLLTLWAELTPISGHDRP  | Negative |
| A8Y7P1 | DRPKFCYLPADPGECLAHMR  | Negative |

|        |                      |          |
|--------|----------------------|----------|
| A9Q0M7 | TIEKFENIKLFSLKKIIGGK | Negative |
| A9Q0M7 | MNTIEKFENIKLFSLKKIIG | Negative |
| A9Q0M7 | GLYCNQKKCWVNWSETATTI | Negative |
| A9Q0M7 | NGLYCNQKKCWVNWSETATT | Negative |
| A9Q0M7 | IEKFENIKLFSLKKIIGGKT | Negative |
| A9Q0M7 | GNGLYCNQKKCWVNWSETAT | Negative |
| A9Q0M7 | KFENIKLFSLKKIIGGKTVN | Negative |
| A9Q0M7 | KKIIGGKTVNYGNGLYCNQK | Negative |
| A9Q0M7 | IGGKTVNYGNGLYCNQKKCW | Negative |
| A9Q0M7 | LKKIIGGKTVNYGNGLYCNQ | Negative |
| A9Q0M7 | SLKKIIGGKTVNYGNGLYCN | Negative |
| A9Q0M7 | NIKLFSLKKIIGGKTVNYGN | Negative |
| A9Q0M7 | KLFSLKKIIGGKTVNYGNGL | Negative |
| A9Q0M7 | IKLFSLKKIIGGKTVNYGNG | Negative |
| A9Q0M7 | ENIKLFSLKKIIGGKTVNYG | Negative |
| A9Q0M7 | NTIEKFENIKLFSLKKIIGG | Negative |
| A9Q0M7 | NYGNGLYCNQKKCWVNWSET | Negative |
| A9Q0M7 | FSLKKIIGGKTVNYGNGLYC | Negative |
| A9Q0M7 | VNYGNGLYCNQKKCWVNWSE | Negative |
| A9Q0M7 | GGKTVNYGNGLYCNQKKCWV | Negative |
| A9Q0M7 | EKFENIKLFSLKKIIGGKTV | Negative |
| A9Q0M7 | YGNGLYCNQKKCWVNWSETA | Negative |
| A9Q0M7 | LFSLKKIIGGKTVNYGNGLY | Negative |
| A9Q0M7 | IIGGKTVNYGNGLYCNQKKC | Negative |
| A9Q0M7 | GKTVNYGNGLYCNQKKCWVN | Negative |
| A9Q0M7 | TVNYGNGLYCNQKKCWVNWS | Negative |
| A9Q0M7 | KTVNYGNGLYCNQKKCWVNW | Negative |
| A9Q0M7 | KIIGGKTVNYGNGLYCNQKK | Negative |
| A9Q0M7 | LYCNQKKCWVNWSETATTIV | Negative |
| A9UGV5 | AVAAVVVVASSLVGTASAAD | Negative |
| A9UGV5 | SLVGTASAADAPAPAPTSGA | Negative |
| A9UGV5 | TASAADAPAPAPTSGATATA | Negative |
| A9UGV5 | SSLVGTASAADAPAPAPTSG | Negative |
| A9UGV5 | LVGTASAADAPAPAPTSGAT | Negative |
| A9UGV5 | GTASAADAPAPAPTSGATAT | Negative |
| A9UGV5 | SAADAPAPAPTSGATATAAA | Negative |
| A9UGV5 | IVAVAVAAVVVVASSLVGTA | Negative |
| A9UGV5 | SKIVAVAVAAVVVVASSLVG | Negative |
| A9UGV5 | VVASSLVGTASAADAPAPAP | Negative |
| A9UGV5 | MAGQLKSKIVAVAVAAVVVV | Negative |
| A9UGV5 | LKSKIVAVAVAAVVVVASSL | Negative |
| A9UGV5 | VAAVVVVASSLVGTASAADA | Negative |
| A9UGV5 | AGQLKSKIVAVAVAAVVVVA | Negative |
| A9UGV5 | QLKSKIVAVAVAAVVVVASS | Negative |
| A9UGV5 | VGTAADAPAPAPTSGATA   | Negative |
| A9UGV5 | ASAADAPAPAPTSGATATAA | Negative |

|        |                      |          |
|--------|----------------------|----------|
| A9UGV5 | VVVVASSLVGTASAADAPAP | Negative |
| A9UGV5 | VAVAAVVVVASSLVGTASAA | Negative |
| A9UGV5 | VVVASSLVGTASAADAPAPA | Negative |
| A9UGV5 | VASSLVGTASAADAPAPAPT | Negative |
| A9UGV5 | ASSLVGTASAADAPAPAPTS | Negative |
| A9UGV5 | GQLKSKIVAVAVAAVVVVAS | Negative |
| A9UGV5 | AVAVAAVVVVASSLVGTASA | Negative |
| A9UGV5 | KIVAVAVAAVVVVASSLVGT | Negative |
| A9UGV5 | VAVAVAAVVVVASSLVGTAS | Negative |
| A9UGV5 | KSKIVAVAVAAVVVVASSLV | Negative |
| A9UGV5 | AAVVVVASSLVGTASAADAP | Negative |
| A9UGV5 | AADAPAPAPTSGATATAAAA | Negative |
| A9UGV6 | ADAPAPAPTSGAVAAVSAPL | Negative |
| A9UGV6 | DAPAPAPTSGAVAAVSAPLS | Negative |
| A9UGV6 | ASAADAPAPAPTSGAVAAVS | Negative |
| A9UGV6 | VASAADAPAPAPTSGAVAAV | Negative |
| A9UGV6 | VIAFAVVAAAALATVASAAD | Negative |
| A9UGV6 | PAPAPTSGAVAAVSAPLSVC | Negative |
| A9UGV6 | AAVIAFAVVAAAALATVASA | Negative |
| A9UGV6 | ATVASAADAPAPAPTSGAVA | Negative |
| A9UGV6 | TVASAADAPAPAPTSGAVAA | Negative |
| A9UGV6 | AFAVVAAAALATVASAADAP | Negative |
| A9UGV6 | LATVASAADAPAPAPTSGAV | Negative |
| A9UGV6 | ALATVASAADAPAPAPTSGA | Negative |
| A9UGV6 | ARFSAAVIAFAVVAAAALA  | Negative |
| A9UGV6 | AAAVIAFAVVAAAALATVAS | Negative |
| A9UGV6 | VAAAALATVASAADAPAPAP | Negative |
| A9UGV6 | IAFAVVAAAALATVASAADA | Negative |
| A9UGV6 | AAAALATVASAADAPAPAPT | Negative |
| A9UGV6 | SAADAPAPAPTSGAVAAVSA | Negative |
| A9UGV6 | AALATVASAADAPAPAPTS  | Negative |
| A9UGV6 | AVVAAAALATVASAADAPAP | Negative |
| A9UGV6 | RFSAAVIAFAVVAAAALAT  | Negative |
| A9UGV6 | AADAPAPAPTSGAVAAVSAP | Negative |
| A9UGV6 | AAALATVASAADAPAPAPTS | Negative |
| A9UGV6 | MARFSAAVIAFAVVAAAAL  | Negative |
| A9UGV6 | AVIAFAVVAAAALATVASAA | Negative |
| A9UGV6 | FSAAVIAFAVVAAAALATV  | Negative |
| A9UGV6 | SAAVIAFAVVAAAALATVA  | Negative |
| A9UGV6 | APAPAPTSGAVAAVSAPLSV | Negative |
| A9UGV6 | VVAAAALATVASAADAPAPA | Negative |
| A9UGV7 | AGVAYAADAPAPSPTSGAAA | Negative |
| A9UGV7 | SLAGVAYAADAPAPSPTSGA | Negative |
| A9UGV7 | RILYAAAVVAAVAVSSLAGV | Negative |
| A9UGV7 | VVAAVAVSSLAGVAYAADAP | Negative |
| A9UGV7 | VSSLAGVAYAADAPAPSPTS | Negative |

|        |                      |          |
|--------|----------------------|----------|
| A9UGV7 | PAPSPTSGAAAVSSSLVAAV | Negative |
| A9UGV7 | LYAAAVVAAVAVSSLAGVAY | Negative |
| A9UGV7 | VAVSSLAGVAYAADAPAPSP | Negative |
| A9UGV7 | SSLAGVAYAADAPAPSPTSG | Negative |
| A9UGV7 | AVSSLAGVAYAADAPAPSPT | Negative |
| A9UGV7 | AVAVSSLAGVAYAADAPAPS | Negative |
| A9UGV7 | DAPAPSPTSGAAAVSSSLVA | Negative |
| A9UGV7 | YAADAPAPSPTSGAAAVSSS | Negative |
| A9UGV7 | AADAPAPSPTSGAAAVSSSL | Negative |
| A9UGV7 | ADAPAPSPTSGAAAVSSSLV | Negative |
| A9UGV7 | AAVVAAVAVSSLAGVAYAAD | Negative |
| A9UGV7 | APAPSPTSGAAAVSSSLVAA | Negative |
| A9UGV7 | MASRILYAAAVVAAVAVSSL | Negative |
| A9UGV7 | YAAAVVAAVAVSSLAGVAYA | Negative |
| A9UGV7 | AVVAAVAVSSLAGVAYAADA | Negative |
| A9UGV7 | SRILYAAAVVAAVAVSSLAG | Negative |
| A9UGV7 | LAGVAYAADAPAPSPTSGAA | Negative |
| A9UGV7 | ILYAAAVVAAVAVSSLAGVA | Negative |
| A9UGV7 | GVAYAADAPAPSPTSGAAAV | Negative |
| A9UGV7 | ASRILYAAAVVAAVAVSSLA | Negative |
| A9UGV7 | AAAVVAAVAVSSLAGVAYAA | Negative |
| A9UGV7 | AYAADAPAPSPTSGAAAVSS | Negative |
| A9UGV7 | VAYAADAPAPSPTSGAAAVS | Negative |
| A9UGV7 | AAVAVSSLAGVAYAADAPAP | Negative |
| A9XE60 | GMVALSSCGFREKHFQRFVK | Negative |
| A9XE60 | FLGMVALSSCGFREKHFQRF | Negative |
| A9XE60 | LLFLGMVALSSCGFREKHFQ | Negative |
| A9XE60 | HFQRFVKYAVPESTLRTVLQ | Negative |
| A9XE60 | LFLGMVALSSCGFREKHFQR | Negative |
| A9XE60 | CGFREKHFQRFVKYAVPEST | Negative |
| A9XE60 | RFVKYAVPESTLRTVLQTVV | Negative |
| A9XE60 | QRFVKYAVPESTLRTVLQTV | Negative |
| A9XE60 | QRNLVLLFLGMVALSSCGF  | Negative |
| A9XE60 | LSSCGFREKHFQRFVKYAVP | Negative |
| A9XE60 | MQRNLVLLFLGMVALSSCG  | Negative |
| A9XE60 | NLVLLFLGMVALSSCGFRE  | Negative |
| A9XE60 | REKHFQRFVKYAVPESTLRT | Negative |
| A9XE60 | SCGFREKHFQRFVKYAVPES | Negative |
| A9XE60 | VALSSCGFREKHFQRFVKYA | Negative |
| A9XE60 | VKYAVPESTLRTVLQTVVHK | Negative |
| A9XE60 | EKHFQRFVKYAVPESTLRTV | Negative |
| A9XE60 | VVLLFLGMVALSSCGFREKH | Negative |
| A9XE60 | ALSSCGFREKHFQRFVKYAV | Negative |
| A9XE60 | SSCGFREKHFQRFVKYAVPE | Negative |
| A9XE60 | KHFQRFVKYAVPESTLRTVL | Negative |
| A9XE60 | FREKHFQRFVKYAVPESTLR | Negative |

|        |                      |          |
|--------|----------------------|----------|
| A9XE60 | FVKYAVPESTLRTVLQTVVH | Negative |
| A9XE60 | RNLVLLFLGMVALSSCGFR  | Negative |
| A9XE60 | FQRFVKYAVPESTLRTVLQT | Negative |
| A9XE60 | GFREKHFQRFVKYAVPESTL | Negative |
| A9XE60 | MVALSSCGFREKHFQRFVKY | Negative |
| A9XE60 | LGMVALSSCGFREKHFQRFV | Negative |
| A9XE60 | VLLFLGMVALSSCGFREKHF | Negative |
| B0B815 | SMAEFISTNVISLADTKAKD | Negative |
| B0B815 | VTIFAVTSVASLFASGVLET | Negative |
| B0B815 | MAEFISTNVISLADTKAKDN | Negative |
| B0B815 | TSVASLFASGVLETSMAEFI | Negative |
| B0B815 | NKLIRRAVTIFAVTSVASLF | Negative |
| B0B815 | RAVTIFAVTSVASLFASGVL | Negative |
| B0B815 | LFASGVLETSMAEFISTNVI | Negative |
| B0B815 | RRAVTIFAVTSVASLFASGV | Negative |
| B0B815 | FAVTSVASLFASGVLETSM  | Negative |
| B0B815 | ASLFASGVLETSMAEFISTN | Negative |
| B0B815 | KLIRRAVTIFAVTSVASLFA | Negative |
| B0B815 | IFAVTSVASLFASGVLETSM | Negative |
| B0B815 | LIRRAVTIFAVTSVASLFAS | Negative |
| B0B815 | SLFASGVLETSMAEFISTNV | Negative |
| B0B815 | MNKLIRRAVTIFAVTSVASL | Negative |
| B0B815 | AVTSVASLFASGVLETSM   | Negative |
| B0B815 | SVASLFASGVLETSMAEFIS | Negative |
| B0B815 | IRRAVTIFAVTSVASLFASG | Negative |
| B0B815 | LETSMAEFISTNVISLADTK | Negative |
| B0B815 | ASGVLETSMAEFISTNVISL | Negative |
| B0B815 | VASLFASGVLETSMAEFIST | Negative |
| B0B815 | SGVLETSMAEFISTNVISLA | Negative |
| B0B815 | TIFAVTSVASLFASGVLETS | Negative |
| B0B815 | VLETSMAEFISTNVISLADT | Negative |
| B0B815 | VTSVASLFASGVLETSM    | Negative |
| B0B815 | ETSMAEFISTNVISLADTKA | Negative |
| B0B815 | TSMAEFISTNVISLADTKAK | Negative |
| B0B815 | FASGVLETSMAEFISTNVIS | Negative |
| B0B815 | GVLETSMAEFISTNVISLAD | Negative |
| B0FHH8 | ALHWLLLAALLGCTLAEEQA | Negative |
| B0FHH8 | YNCEEASEAVCSVKEVRINP | Negative |
| B0FHH8 | LAALLGCTLAEEQAIFYNCE | Negative |
| B0FHH8 | AEEQAIFYNCEEASEAVCSV | Negative |
| B0FHH8 | LAEEQAIFYNCEEASEAVCS | Negative |
| B0FHH8 | CTLAEEQAIFYNCEEASEAV | Negative |
| B0FHH8 | WLLLAALLGCTLAEEQAIFY | Negative |
| B0FHH8 | LLLAALLGCTLAEEQAIFYN | Negative |
| B0FHH8 | MAALHWLLLAALLGCTLAEE | Negative |
| B0FHH8 | LGCTLAEEQAIFYNCEEASE | Negative |

|        |                       |          |
|--------|-----------------------|----------|
| B0FHH8 | LLAALLGCTLAEEQAIFYNC  | Negative |
| B0FHH8 | TLAEEQAIFYNCEEASEAVC  | Negative |
| B0FHH8 | NCEEASEAVCSVKEVRINPC  | Negative |
| B0FHH8 | ALLGCTLAEEQAIFYNCEEA  | Negative |
| B0FHH8 | IFYNCEEASEAVCSVKEVRI  | Negative |
| B0FHH8 | CEEASEAVCSVKEVRINPCN  | Negative |
| B0FHH8 | ASEAVCSVKEVRINPCNPVK  | Negative |
| B0FHH8 | AALHWLLLAALLGCTLAEEQ  | Negative |
| B0FHH8 | LLGCTLAEEQAIFYNCEEAS  | Negative |
| B0FHH8 | QAIFYNCEEASEAVCSVKEV  | Negative |
| B0FHH8 | GCTLAEEQAIFYNCEEASEA  | Negative |
| B0FHH8 | EQAIFYNCEEASEAVCSVKE  | Negative |
| B0FHH8 | FYNCEEASEAVCSVKEVRIN  | Negative |
| B0FHH8 | EASEAVCSVKEVRINPCNPN  | Negative |
| B0FHH8 | HWLLLAALLGCTLAEEQAIF  | Negative |
| B0FHH8 | AIFYNCEEASEAVCSVKEVR  | Negative |
| B0FHH8 | AALLGCTLAEEQAIFYNCEE  | Negative |
| B0FHH8 | EEASEAVCSVKEVRINPCNP  | Negative |
| B0FHH8 | EEQAIFYNCEEASEAVCSVK  | Negative |
| B0JFB8 | LICGTNYCKDHPCTSPIARA  | Negative |
| B0JFB8 | KDHPCTSPIARASCRSPATY  | Negative |
| B0JFB8 | TNYCKDHPCTSPIARASCRS  | Negative |
| B0JFB8 | DLICGTNYCKDHPCTSPIAR  | Negative |
| B0JFB8 | CILVVITYGDLICGTNYCKDH | Negative |
| B0JFB8 | LFLACILVVITYGDLICGTNY | Negative |
| B0JFB8 | FLACILVVITYGDLICGTNYC | Negative |
| B0JFB8 | ICGTNYCKDHPCTSPIARAS  | Negative |
| B0JFB8 | GDLICGTNYCKDHPCTSPIA  | Negative |
| B0JFB8 | LVVITYGDLICGTNYCKDHPC | Negative |
| B0JFB8 | TLLFLACILVVITYGDLICGT | Negative |
| B0JFB8 | VITLLFLACILVVITYGDLIC | Negative |
| B0JFB8 | GTNYCKDHPCTSPIARASCR  | Negative |
| B0JFB8 | CKDHPCTSPIARASCRSPAT  | Negative |
| B0JFB8 | VTYGDLICGTNYCKDHPCTS  | Negative |
| B0JFB8 | ACILVVITYGDLICGTNYCKD | Negative |
| B0JFB8 | AVITLLFLACILVVITYGDLI | Negative |
| B0JFB8 | NYCKDHPCTSPIARASCRSP  | Negative |
| B0JFB8 | DHPCTSPIARASCRSPATYR  | Negative |
| B0JFB8 | MKAVITLLFLACILVVITYGD | Negative |
| B0JFB8 | LLFLACILVVITYGDLICGTN | Negative |
| B0JFB8 | LACILVVITYGDLICGTNYCK | Negative |
| B0JFB8 | ILVVITYGDLICGTNYCKDHP | Negative |
| B0JFB8 | YCKDHPCTSPIARASCRSPA  | Negative |
| B0JFB8 | VVITYGDLICGTNYCKDHPCT | Negative |
| B0JFB8 | YGDICGTNYCKDHPCTSPI   | Negative |
| B0JFB8 | CGTNYCKDHPCTSPIARASC  | Negative |



|        |                       |          |
|--------|-----------------------|----------|
| B0JFB8 | KAVITLLFLACILVVTYGDL  | Negative |
| B0JFB8 | TYGDLICGTNYCKDHPCTSP  | Negative |
| B0XRVO | AAAASTALALTPEQLITAPR  | Negative |
| B0XRVO | RSEAIPDPSGKVAVFSTSQY  | Negative |
| B0XRVO | AASTALALTPEQLITAPRRS  | Negative |
| B0XRVO | APRRSEAIPDPSGKVAVFST  | Negative |
| B0XRVO | PEQLITAPRRSEAIPDPSGK  | Negative |
| B0XRVO | ASTALALTPEQLITAPRRSE  | Negative |
| B0XRVO | LALTPEQLITAPRRSEAIPD  | Negative |
| B0XRVO | EQLITAPRRSEAIPDPSGKV  | Negative |
| B0XRVO | SIAAAASTALALTPEQLITA  | Negative |
| B0XRVO | LTPEQLITAPRRSEAIPDPS  | Negative |
| B0XRVO | ITAPRRSEAIPDPSGKVAVF  | Negative |
| B0XRVO | STALALTPEQLITAPRRSEA  | Negative |
| B0XRVO | MGAFRWLSIAAAASTALALT  | Negative |
| B0XRVO | RWLSIAAAASTALALTPEQL  | Negative |
| B0XRVO | TPEQLITAPRRSEAIPDPSG  | Negative |
| B0XRVO | LITAPRRSEAIPDPSGKVAV  | Negative |
| B0XRVO | QLITAPRRSEAIPDPSGKVA  | Negative |
| B0XRVO | TAPRRSEAIPDPSGKVAVFS  | Negative |
| B0XRVO | TALALTPEQLITAPRRSEAI  | Negative |
| B0XRVO | ALALTPEQLITAPRRSEAIP  | Negative |
| B0XRVO | ALTPEQLITAPRRSEAIPDP  | Negative |
| B0XRVO | AAASTALALTPEQLITAPRR  | Negative |
| B0XRVO | RRSEAIPDPSGKVAVFSTSQ  | Negative |
| B0XRVO | WLSIAAAASTALALTPEQLI  | Negative |
| B0XRVO | GAFRWLSIAAAASTALALTP  | Negative |
| B0XRVO | AFRWLSIAAAASTALALTPE  | Negative |
| B0XRVO | IAAAASTALALTPEQLITAP  | Negative |
| B0XRVO | PRRSEAIPDPSGKVAVFSTS  | Negative |
| B0XRVO | LSIAAAASTALALTPEQLIT  | Negative |
| B0XT72 | AVGASTVLAAPSIKARDDVT  | Negative |
| B0XT72 | KARDDVTPITVKGN AFFKGD | Negative |
| B0XT72 | GASTVLAAPSIKARDDVTPI  | Negative |
| B0XT72 | ARDDVTPITVKGN AFFKGDE | Negative |
| B0XT72 | STVLAAPSIKARDDVTPITV  | Negative |
| B0XT72 | TVLAAPSIKARDDVTPITVK  | Negative |
| B0XT72 | LAAPSIKARDDVTPITVKGN  | Negative |
| B0XT72 | LAVGASTVLAAPSIKARDDV  | Negative |
| B0XT72 | TAALAVGASTVLAAPSIKAR  | Negative |
| B0XT72 | AAPSIKARDDVTPITVKGNA  | Negative |
| B0XT72 | ASAVTAALAVGASTVLAAPS  | Negative |
| B0XT72 | DVTPITVKGN AFFKGDERFY | Negative |
| B0XT72 | SIKARDDVTPITVKGN AFFK | Negative |
| B0XT72 | APSIKARDDVTPITVKGN AF | Negative |
| B0XT72 | ASTVLAAPSIKARDDVTPIT  | Negative |

|        |                       |          |
|--------|-----------------------|----------|
| B0XT72 | SAVTAALAVGASTVLAAPSI  | Negative |
| B0XT72 | VTPITVKGNAFFKGDERTFYI | Negative |
| B0XT72 | VLAAPSIKARDDVTPITVKG  | Negative |
| B0XT72 | RDDVTPITVKGNAFFKGDERT | Negative |
| B0XT72 | VGASTVLAAPSIKARDDVTP  | Negative |
| B0XT72 | IKARDDVTPITVKGNAFFKG  | Negative |
| B0XT72 | KASAVTAALAVGASTVLAAP  | Negative |
| B0XT72 | DDVTPITVKGNAFFKGDERT  | Negative |
| B0XT72 | PSIKARDDVTPITVKGNAFF  | Negative |
| B0XT72 | ALAVGASTVLAAPSIKARDD  | Negative |
| B0XT72 | VTAAALAVGASTVLAAPSIKA | Negative |
| B0XT72 | MKASAVTAALAVGASTVLAA  | Negative |
| B0XT72 | TPITVKGNAFFKGDERTFYIR | Negative |
| B0XT72 | AALAVGASTVLAAPSIKARD  | Negative |
| B1B5I8 | CHLQPDVPKCRGYFPRYYYN  | Negative |
| B1B5I8 | ALCHLQPDVPKCRGYFPRYY  | Negative |
| B1B5I8 | HLQPDVPKCRGYFPRYYYNP  | Negative |
| B1B5I8 | EMPALCHLQPDVPKCRGYFP  | Negative |
| B1B5I8 | CLTMATEEMPALCHLQPDVP  | Negative |
| B1B5I8 | LYFLLCLALVACLTMATEEM  | Negative |
| B1B5I8 | MPALCHLQPDVPKCRGYFPR  | Negative |
| B1B5I8 | EEMPALCHLQPDVPKCRGYF  | Negative |
| B1B5I8 | ATEEMPALCHLQPDVPKCRG  | Negative |
| B1B5I8 | ALVACLTMATEEMPALCHLQ  | Negative |
| B1B5I8 | AKLYFLLCLALVACLTMATE  | Negative |
| B1B5I8 | LCHLQPDVPKCRGYFPRYYY  | Negative |
| B1B5I8 | KLYFLLCLALVACLTMATEE  | Negative |
| B1B5I8 | VACLTMATEEMPALCHLQPD  | Negative |
| B1B5I8 | MAKLYFLLCLALVACLTMAT  | Negative |
| B1B5I8 | TMATEEMPALCHLQPDVPKC  | Negative |
| B1B5I8 | PALCHLQPDVPKCRGYFPRY  | Negative |
| B1B5I8 | QPDVPKCRGYFPRYYYNPEV  | Negative |
| B1B5I8 | LLCLALVACLTMATEEMPAL  | Negative |
| B1B5I8 | ACLTMATEEMPALCHLQPDV  | Negative |
| B1B5I8 | LQPDVPKCRGYFPRYYYNPE  | Negative |
| B1B5I8 | LCLALVACLTMATEEMPALC  | Negative |
| B1B5I8 | CLALVACLTMATEEMPALCH  | Negative |
| B1B5I8 | MATEEMPALCHLQPDVPKCR  | Negative |
| B1B5I8 | FLLCLALVACLTMATEEMPA  | Negative |
| B1B5I8 | LTIMATEEMPALCHLQPDVPK | Negative |
| B1B5I8 | TEEMPALCHLQPDVPKCRGY  | Negative |
| B1B5I8 | LALVACLTMATEEMPALCHL  | Negative |
| B1B5I8 | LVACLTMATEEMPALCHLQP  | Negative |
| B1P0S1 | SLFTVGQFIFLFWTISITEA  | Negative |
| B1P0S1 | RAAAAAAASKAAVTAADAAA  | Negative |
| B1P0S1 | LFWTISITEANIDPAARAAA  | Negative |

|        |                      |          |
|--------|----------------------|----------|
| B1P0S1 | EANIDPAARAAAAAASKAA  | Negative |
| B1P0S1 | QFIFLFWTISITEANIDPAA | Negative |
| B1P0S1 | TISITEANIDPAARAAAAAA | Negative |
| B1P0S1 | ARAAAAAASKAAVTAADAA  | Negative |
| B1P0S1 | SITEANIDPAARAAAAAAS  | Negative |
| B1P0S1 | NIDPAARAAAAAASKAAVT  | Negative |
| B1P0S1 | DPAARAAAAAASKAAVTAA  | Negative |
| B1P0S1 | TVGQFIFLFWTISITEANID | Negative |
| B1P0S1 | ITEANIDPAARAAAAAASK  | Negative |
| B1P0S1 | TEANIDPAARAAAAAASKA  | Negative |
| B1P0S1 | WTISITEANIDPAARAAAA  | Negative |
| B1P0S1 | ALSLFTVGQFIFLFWTISIT | Negative |
| B1P0S1 | LSLFTVGQFIFLFWTISITE | Negative |
| B1P0S1 | MALSLFTVGQFIFLFWTISI | Negative |
| B1P0S1 | FLFWTISITEANIDPAARAA | Negative |
| B1P0S1 | FIFLFWTISITEANIDPAAR | Negative |
| B1P0S1 | IFLFWTISITEANIDPAARA | Negative |
| B1P0S1 | FWTISITEANIDPAARAAAA | Negative |
| B1P0S1 | IDPAARAAAAAASKAAVTA  | Negative |
| B1P0S1 | FTVGQFIFLFWTISITEANI | Negative |
| B1P0S1 | AARAAAAAASKAAVTAADA  | Negative |
| B1P0S1 | VGQFIFLFWTISITEANIDP | Negative |
| B1P0S1 | ANIDPAARAAAAAASKAAV  | Negative |
| B1P0S1 | LFTVGQFIFLFWTISITEAN | Negative |
| B1P0S1 | ISITEANIDPAARAAAAAA  | Negative |
| B1P0S1 | PAARAAAAAASKAAVTAAD  | Negative |
| B2BRQ5 | LLLTLVVVTIVCLDFGGGLI | Negative |
| B2BRQ5 | KTLLLTLVVVTIVCLDFGGG | Negative |
| B2BRQ5 | CYMGPKTPRTCPPGQNLCT  | Negative |
| B2BRQ5 | TLLLTLVVVTIVCLDFGGGL | Negative |
| B2BRQ5 | KTPRTCPPGQNLCTKTWCD  | Negative |
| B2BRQ5 | CLDFGGGLICYMGPKTPRTC | Negative |
| B2BRQ5 | LLTLVVVTIVCLDFGGGLIC | Negative |
| B2BRQ5 | VTIVCLDFGGGLICYMGPKT | Negative |
| B2BRQ5 | GLICYMGPKTPRTCPPGQNL | Negative |
| B2BRQ5 | LICYMGPKTPRTCPPGQNLC | Negative |
| B2BRQ5 | LTLVVVTIVCLDFGGGLICY | Negative |
| B2BRQ5 | VCLDFGGGLICYMGPKTPRT | Negative |
| B2BRQ5 | TPRTCPPGQNLCTKTWCDG  | Negative |
| B2BRQ5 | GGGLICYMGPKTPRTCPPGQ | Negative |
| B2BRQ5 | ICYMGPKTPRTCPPGQNLCT | Negative |
| B2BRQ5 | PKTPRTCPPGQNLCTKTWC  | Negative |
| B2BRQ5 | TIVCLDFGGGLICYMGPKTP | Negative |
| B2BRQ5 | GPKTPRTCPPGQNLCTKTW  | Negative |
| B2BRQ5 | VVTIVCLDFGGGLICYMGPK | Negative |
| B2BRQ5 | DFGGGLICYMGPKTPRTCP  | Negative |

|        |                        |          |
|--------|------------------------|----------|
| B2BRQ5 | IVCLDFGGGLICYMGPKTPR   | Negative |
| B2BRQ5 | MGPKTPTCTPPGQNLCTYTKT  | Negative |
| B2BRQ5 | FGGGLICYMGPKTPRTCTPPG  | Negative |
| B2BRQ5 | GGLICYMGPKTPRTCTPPGQN  | Negative |
| B2BRQ5 | MKTLLTLVVVTIVCLDFGG    | Negative |
| B2BRQ5 | VVVVTIVCLDFGGGLICYMG   | Negative |
| B2BRQ5 | LDFGGGLICYMGPKTPRTCP   | Negative |
| B2BRQ5 | LVVVVTIVCLDFGGGLICYMG  | Negative |
| B2BRQ5 | YMGPKTPRTCTPPGQNLCTYTK | Negative |
| B2G331 | SICLEPKVVGPCTAYFRRFY   | Negative |
| B2G331 | TQAGSICLEPKVVGPCTAYF   | Negative |
| B2G331 | LIAGFSFKSTQAGSICLEPK   | Negative |
| B2G331 | PKVVGPCTAYFRRFYFDSET   | Negative |
| B2G331 | GSICLEPKVVGPCTAYFRRF   | Negative |
| B2G331 | IAGFSFKSTQAGSICLEPKV   | Negative |
| B2G331 | MKGTFILICLILAGFSFKST   | Negative |
| B2G331 | EPKVVGPCTAYFRRFYFDSE   | Negative |
| B2G331 | LILAGFSFKSTQAGSICLE    | Negative |
| B2G331 | SFKSTQAGSICLEPKVVGPC   | Negative |
| B2G331 | ILAGFSFKSTQAGSICLEP    | Negative |
| B2G331 | STQAGSICLEPKVVGPCTAY   | Negative |
| B2G331 | TFILICLILAGFSFKSTQAG   | Negative |
| B2G331 | FSFKSTQAGSICLEPKVVGP   | Negative |
| B2G331 | GTFLICLILAGFSFKSTQA    | Negative |
| B2G331 | KSTQAGSICLEPKVVGPCTA   | Negative |
| B2G331 | FLICLILAGFSFKSTQAGS    | Negative |
| B2G331 | GFSFKSTQAGSICLEPKVVG   | Negative |
| B2G331 | LEPKVVGPCTAYFRRFYFDS   | Negative |
| B2G331 | ICLEPKVVGPCTAYFRRFYF   | Negative |
| B2G331 | KVVGPCTAYFRRFYFDSETG   | Negative |
| B2G331 | FKSTQAGSICLEPKVVGPCT   | Negative |
| B2G331 | AGSICLEPKVVGPCTAYFRR   | Negative |
| B2G331 | AGFSFKSTQAGSICLEPKVV   | Negative |
| B2G331 | KGTFLICLILAGFSFKSTQ    | Negative |
| B2G331 | LICLILAGFSFKSTQAGSI    | Negative |
| B2G331 | QAGSICLEPKVVGPCTAYFR   | Negative |
| B2G331 | CLEPKVVGPCTAYFRRFYFD   | Negative |
| B2G331 | ICLILAGFSFKSTQAGSIC    | Negative |
| B2KNH9 | LALFSTLVSADNHLLPGERL   | Negative |
| B2KNH9 | LFSTLVSADNHLLPGERLNP   | Negative |
| B2KNH9 | TLVSADNHLLPGERLNPGNF   | Negative |
| B2KNH9 | NHLLPGERLNPGNFLKQDRY   | Negative |
| B2KNH9 | VSADNHLLPGERLNPGNFLK   | Negative |
| B2KNH9 | ADNHLLPGERLNPGNFLKQD   | Negative |
| B2KNH9 | DNHLLPGERLNPGNFLKQDR   | Negative |
| B2KNH9 | LSLALFSTLVSADNHLLPGE   | Negative |

|        |                      |          |
|--------|----------------------|----------|
| B2KNH9 | FSTLVSADNHLLPGERLNPG | Negative |
| B2KNH9 | LLSLALFSTLVSADNHLLPG | Negative |
| B2KNH9 | LPGERLNPGNFLKQDRYMLI | Negative |
| B2KNH9 | ALFSTLVSADNHLLPGERLN | Negative |
| B2KNH9 | MAFSISSTMIFLLSLALFST | Negative |
| B2KNH9 | STMIFLLSLALFSTLVSADN | Negative |
| B2KNH9 | SSTMIFLLSLALFSTLVSAD | Negative |
| B2KNH9 | SLALFSTLVSADNHLLPGER | Negative |
| B2KNH9 | TMIFLLSLALFSTLVSADNH | Negative |
| B2KNH9 | ISSTMIFLLSLALFSTLVSA | Negative |
| B2KNH9 | LVSADNHLLPGERLNPGNFL | Negative |
| B2KNH9 | LLPGERLNPGNFLKQDRYML | Negative |
| B2KNH9 | PGERLNPGNFLKQDRYMLIM | Negative |
| B2KNH9 | HLLPGERLNPGNFLKQDRYM | Negative |
| B2KNH9 | FSISSTMIFLLSLALFSTLV | Negative |
| B2KNH9 | SADNHLLPGERLNPGNFLKQ | Negative |
| B2KNH9 | STLVSADNHLLPGERLNPGN | Negative |
| B2KNH9 | FLLSLALFSTLVSADNHLLP | Negative |
| B2KNH9 | SISSTMIFLLSLALFSTLVS | Negative |
| B2KNH9 | MIFLLSLALFSTLVSADNHL | Negative |
| B2KNH9 | AFSISSTMIFLLSLALFSTL | Negative |
| B2KTG1 | VSSLGGPAYCKLPPEPGPCH | Negative |
| B2KTG1 | TELPVSSLGGPAYCKLPPE  | Negative |
| B2KTG1 | LTPVSSLGGPAYCKLPPEPG | Negative |
| B2KTG1 | YCKLPPEPGPCHEYKHAFYY | Negative |
| B2KTG1 | SGGLLLLLGLLTLWTELPV  | Negative |
| B2KTG1 | LLTLWTELPVSSLGGPAYC  | Negative |
| B2KTG1 | SSGGLLLLLGLLTLWTELP  | Negative |
| B2KTG1 | ELTPVSSLGGPAYCKLPPEP | Negative |
| B2KTG1 | PVSSLGGPAYCKLPPEPGPC | Negative |
| B2KTG1 | LGGPAYCKLPPEPGPCHEYK | Negative |
| B2KTG1 | LTLWTELPVSSLGGPAYCK  | Negative |
| B2KTG1 | MSSGGLLLLLGLLTLWTELT | Negative |
| B2KTG1 | LLGLLTLWTELPVSSLGGP  | Negative |
| B2KTG1 | SLGGPAYCKLPPEPGPCHEY | Negative |
| B2KTG1 | TPVSSLGGPAYCKLPPEPGP | Negative |
| B2KTG1 | GLLLLLGLLTLWTELPVSS  | Negative |
| B2KTG1 | AYCKLPPEPGPCHEYKHAFY | Negative |
| B2KTG1 | LWTELPVSSLGGPAYCKLP  | Negative |
| B2KTG1 | GLLTLWTELPVSSLGGPAY  | Negative |
| B2KTG1 | LLLGLLTLWTELPVSSLGG  | Negative |
| B2KTG1 | TLWTELPVSSLGGPAYCKL  | Negative |
| B2KTG1 | WTELPVSSLGGPAYCKLPP  | Negative |
| B2KTG1 | GPAYCKLPPEPGPCHEYKHA | Negative |
| B2KTG1 | GGPAYCKLPPEPGPCHEYKH | Negative |
| B2KTG1 | LLLGLLTLWTELPVSSLG   | Negative |

|        |                      |          |
|--------|----------------------|----------|
| B2KTG1 | LLLLLGLLTLWTELTPVSSL | Negative |
| B2KTG1 | SSLGGPAYCKLPPEPGPCHE | Negative |
| B2KTG1 | PAYCKLPPEPGPCHEYKHAF | Negative |
| B2KTG1 | GGLLLLLGLLTLWTELTPVS | Negative |
| B2RIT0 | NKKIFSMMAASIIGSAAMTP | Negative |
| B2RIT0 | MNKKIFSMMAASIIGSAAMT | Negative |
| B2RIT0 | IFSMMAASIIGSAAMTPSAG | Negative |
| B2RIT0 | HLTPELFMTLSRVSEMALSP | Negative |
| B2RIT0 | KIFSMMAASIIGSAAMTPSA | Negative |
| B2RIT0 | AMTPSAGTNTGEHLTPELFM | Negative |
| B2RIT0 | SAAMTPSAGTNTGEHLTPEL | Negative |
| B2RIT0 | KKIFSMMAASIIGSAAMTPS | Negative |
| B2RIT0 | NTGEHLTPELFMTLSRVSEM | Negative |
| B2RIT0 | MMAASIIGSAAMTPSAGTNT | Negative |
| B2RIT0 | GEHLTPELFMTLSRVSEMAL | Negative |
| B2RIT0 | EHLTPELFMTLSRVSEMAIS | Negative |
| B2RIT0 | TNTGEHLTPELFMTLSRVSE | Negative |
| B2RIT0 | PSAGTNTGEHLTPELFMTLS | Negative |
| B2RIT0 | IGSAAMTPSAGTNTGEHLTP | Negative |
| B2RIT0 | GTNTGEHLTPELFMTLSRV  | Negative |
| B2RIT0 | GSAAMTPSAGTNTGEHLTPE | Negative |
| B2RIT0 | SAGTNTGEHLTPELFMTLSR | Negative |
| B2RIT0 | TPSAGTNTGEHLTPELFMTL | Negative |
| B2RIT0 | TGEHLTPELFMTLSRVSEMA | Negative |
| B2RIT0 | FSMMAASIIGSAAMTPSAGT | Negative |
| B2RIT0 | ASIIGSAAMTPSAGTNTGEH | Negative |
| B2RIT0 | IIGSAAMTPSAGTNTGEHLT | Negative |
| B2RIT0 | AAMTPSAGTNTGEHLTPELF | Negative |
| B2RIT0 | SIIGSAAMTPSAGTNTGEHL | Negative |
| B2RIT0 | MAASIIGSAAMTPSAGTNTG | Negative |
| B2RIT0 | MTPSAGTNTGEHLTPELFMT | Negative |
| B2RIT0 | SMMAASIIGSAAMTPSAGTN | Negative |
| B2RIT0 | AGTNTGEHLTPELFMTLSRV | Negative |
| B2RKV3 | MKLKSILLGAALLLGASGVA | Negative |
| B2RKV3 | MWLLNELNQENLDRMRELGF | Negative |
| B2RKV3 | LLLGASGVAKADKGMWLLNE | Negative |
| B2RKV3 | LKSILLGAALLLGASGVAKA | Negative |
| B2RKV3 | AALLLGASGVAKADKGMWLL | Negative |
| B2RKV3 | WLLNELNQENLDRMRELGFT | Negative |
| B2RKV3 | LLGASGVAKADKGMWLLNEL | Negative |
| B2RKV3 | LLNELNQENLDRMRELGFTL | Negative |
| B2RKV3 | QMKLKSILLGAALLLGASGV | Negative |
| B2RKV3 | ILLGAALLLGASGVAKADKG | Negative |
| B2RKV3 | SGVAKADKGMWLLNELNQEN | Negative |
| B2RKV3 | MQMKLKSILLGAALLLGASG | Negative |
| B2RKV3 | KSILLGAALLLGASGVAKAD | Negative |

|        |                      |          |
|--------|----------------------|----------|
| B2RKV3 | KADKGMWLLNELNQENLDRM | Negative |
| B2RKV3 | GMWLLNELNQENLDRMRELG | Negative |
| B2RKV3 | LGAALLLGASGVAKADKGMW | Negative |
| B2RKV3 | AKADKGMWLLNELNQENLDR | Negative |
| B2RKV3 | ADKGMWLLNELNQENLDRMR | Negative |
| B2RKV3 | DKGMWLLNELNQENLDRMRE | Negative |
| B2RKV3 | VAKADKGMWLLNELNQENLD | Negative |
| B2RKV3 | GASGVAKADKGMWLLNELNQ | Negative |
| B2RKV3 | ASGVAKADKGMWLLNELNQE | Negative |
| B2RKV3 | ALLLGASGVAKADKGMWLLN | Negative |
| B2RKV3 | GVAKADKGMWLLNELNQENL | Negative |
| B2RKV3 | GAALLLGASGVAKADKGMWL | Negative |
| B2RKV3 | KLKSILLGAALLLGASGVAK | Negative |
| B2RKV3 | SILLGAALLLGASGVAKADK | Negative |
| B2RKV3 | KGMWLLNELNQENLDRMREL | Negative |
| B2RKV3 | LGASGVAKADKGMWLLNELN | Negative |
| B3A003 | FCVATTAALAYGSDAPCTNS | Negative |
| B3A003 | TNSGGVCQDDHLACHNGHYQ | Negative |
| B3A003 | CQDDHLACHNGHYQSGLCTG | Negative |
| B3A003 | CTNSGGVCQDDHLACHNGHY | Negative |
| B3A003 | FLFCVATTAALAYGSDAPCT | Negative |
| B3A003 | VATTAALAYGSDAPCTNSGG | Negative |
| B3A003 | TTAALAYGSDAPCTNSGGVC | Negative |
| B3A003 | SDAPCTNSGGVCQDDHLACH | Negative |
| B3A003 | AYGSDAPCTNSGGVCQDDHL | Negative |
| B3A003 | SGGVCQDDHLACHNGHYQSG | Negative |
| B3A003 | VCQDDHLACHNGHYQSGLCT | Negative |
| B3A003 | LAYGSDAPCTNSGGVCQDDH | Negative |
| B3A003 | CVATTAALAYGSDAPCTNSG | Negative |
| B3A003 | GSDAPCTNSGGVCQDDHLAC | Negative |
| B3A003 | LFCVATTAALAYGSDAPCTN | Negative |
| B3A003 | ATTAALAYGSDAPCTNSGGV | Negative |
| B3A003 | APCTNSGGVCQDDHLACHNG | Negative |
| B3A003 | NSGGVCQDDHLACHNGHYQS | Negative |
| B3A003 | PCTNSGGVCQDDHLACHNGH | Negative |
| B3A003 | AALAYGSDAPCTNSGGVCQD | Negative |
| B3A003 | NGLFLFCVATTAALAYGSDA | Negative |
| B3A003 | ALAYGSDAPCTNSGGVCQDD | Negative |
| B3A003 | GVCQDDHLACHNGHYQSGLC | Negative |
| B3A003 | TAALAYGSDAPCTNSGGVCQ | Negative |
| B3A003 | MNGLFLFCVATTAALAYGSD | Negative |
| B3A003 | GGVCQDDHLACHNGHYQSGL | Negative |
| B3A003 | YGSDAPCTNSGGVCQDDHLA | Negative |
| B3A003 | GLFLFCVATTAALAYGSDAP | Negative |
| B3A003 | DAPCTNSGGVCQDDHLACHN | Negative |
| B3EWP3 | GFCIFFLVLFLAQEGVVKTE | Negative |

|        |                      |          |
|--------|----------------------|----------|
| B3EWP3 | AQEGVVKTEAKLCNHLADTY | Negative |
| B3EWP3 | QEGVVKTEAKLCNHLADTYR | Negative |
| B3EWP3 | LCNHLADTYRGPCFTNASCD | Negative |
| B3EWP3 | VVKTEAKLCNHLADTYRGPC | Negative |
| B3EWP3 | KTVAGFCIFFLVLFLAQEGV | Negative |
| B3EWP3 | NHLADTYRGPCFTNASCDH  | Negative |
| B3EWP3 | TVAGFCIFFLVLFLAQEGVV | Negative |
| B3EWP3 | VAGFCIFFLVLFLAQEGVVK | Negative |
| B3EWP3 | AKLCNHLADTYRGPCFTNAS | Negative |
| B3EWP3 | AGFCIFFLVLFLAQEGVVKT | Negative |
| B3EWP3 | EGVVKTEAKLCNHLADTYRG | Negative |
| B3EWP3 | KTEAKLCNHLADTYRGPCFT | Negative |
| B3EWP3 | KLCNHLADTYRGPCFTNASC | Negative |
| B3EWP3 | FFLVLFLAQEGVVKTEAKLC | Negative |
| B3EWP3 | CNHLADTYRGPCFTNASCDD | Negative |
| B3EWP3 | TEAKLCNHLADTYRGPCFTN | Negative |
| B3EWP3 | LFLAQEGVVKTEAKLCNHLA | Negative |
| B3EWP3 | VLFLAQEGVVKTEAKLCNHL | Negative |
| B3EWP3 | HLADTYRGPCFTNASCDDHC | Negative |
| B3EWP3 | FCIFFLVLFLAQEGVVKTEA | Negative |
| B3EWP3 | LAQEGVVKTEAKLCNHLADT | Negative |
| B3EWP3 | CIFFLVLFLAQEGVVKTEAK | Negative |
| B3EWP3 | GVVKTEAKLCNHLADTYRGP | Negative |
| B3EWP3 | IFFLVLFLAQEGVVKTEAKL | Negative |
| B3EWP3 | FLVLFLAQEGVVKTEAKLCN | Negative |
| B3EWP3 | VKTEAKLCNHLADTYRGPCF | Negative |
| B3EWP3 | FLAQEGVVKTEAKLCNHLAD | Negative |
| B3EWP3 | EAKLCNHLADTYRGPCFTNA | Negative |
| B3EWP4 | CIFFLILFLAQEYGVEGKEC | Negative |
| B3EWP4 | AQEYGVEGKECLNLSDKFKG | Negative |
| B3EWP4 | ILFLAQEYGVEGKECLNLS  | Negative |
| B3EWP4 | AGFCIFFLILFLAQEYGVEG | Negative |
| B3EWP4 | GFCIFFLILFLAQEYGVEGK | Negative |
| B3EWP4 | LFLAQEYGVEGKECLNLSDK | Negative |
| B3EWP4 | KRTIIMEKKMAGFCIFFLIL | Negative |
| B3EWP4 | VQKRTIIMEKKMAGFCIFFL | Negative |
| B3EWP4 | FLILFLAQEYGVEGKECLNL | Negative |
| B3EWP4 | FCIFFLILFLAQEYGVEGKE | Negative |
| B3EWP4 | EKKMAGFCIFFLILFLAQEY | Negative |
| B3EWP4 | MEKKMAGFCIFFLILFLAQE | Negative |
| B3EWP4 | FLAQEYGVEGKECLNLSDKF | Negative |
| B3EWP4 | VEGKECLNLSDKFKGPCLGS | Negative |
| B3EWP4 | IFFLILFLAQEYGVEGKECL | Negative |
| B3EWP4 | KKMAGFCIFFLILFLAQEYG | Negative |
| B3EWP4 | MAGFCIFFLILFLAQEYGVE | Negative |
| B3EWP4 | LILFLAQEYGVEGKECLNLS | Negative |



|        |                        |          |
|--------|------------------------|----------|
| B3EWP4 | KMAGFCIFFLILFLAQEYGV   | Negative |
| B3EWP4 | GVEGKECLNLSDKFKGPCLG   | Negative |
| B3EWP4 | EYGVEGKECLNLSDKFKGPC   | Negative |
| B3EWP4 | QEYGVGVEGKECLNLSDKFKGP | Negative |
| B3EWP4 | IIMEKKMAGFCIFFLILFLA   | Negative |
| B3EWP4 | IMEKKMAGFCIFFLILFLAQ   | Negative |
| B3EWP4 | YGVEGKECLNLSDKFKGPCL   | Negative |
| B3EWP4 | LAQEYGVGVEGKECLNLSDKFK | Negative |
| B3EWP4 | RTIIMEKKMAGFCIFFLILF   | Negative |
| B3EWP4 | QKRTIIMEKKMAGFCIFFLI   | Negative |
| B3EWP4 | TIIMEKKMAGFCIFFLILFL   | Negative |
| B3EWY1 | ILSILLIALVICSISICTEA   | Negative |
| B3EWY1 | CTEAFGLIDVKCSASRECWV   | Negative |
| B3EWY1 | SILLIALVICSISICTEAFG   | Negative |
| B3EWY1 | DVKCSASRECWVACKKVTGS   | Negative |
| B3EWY1 | GLIDVKCSASRECWVACKKV   | Negative |
| B3EWY1 | MKILSILLIALVICSISICT   | Negative |
| B3EWY1 | SICTEAFGLIDVKCSASREC   | Negative |
| B3EWY1 | ALVICSISICTEAFGLIDVK   | Negative |
| B3EWY1 | IALVICSISICTEAFGLIDV   | Negative |
| B3EWY1 | VKCSASRECWVACKKVTGSG   | Negative |
| B3EWY1 | AFGLIDVKCSASRECWVACK   | Negative |
| B3EWY1 | ILLIALVICSISICTEAFGL   | Negative |
| B3EWY1 | ICSISICTEAFGLIDVKCSA   | Negative |
| B3EWY1 | SISICTEAFGLIDVKCSASR   | Negative |
| B3EWY1 | KILSILLIALVICSISICTE   | Negative |
| B3EWY1 | FGLIDVKCSASRECWVACKK   | Negative |
| B3EWY1 | CSISICTEAFGLIDVKCSAS   | Negative |
| B3EWY1 | ISICTEAFGLIDVKCSASRE   | Negative |
| B3EWY1 | TEAFGLIDVKCSASRECWVA   | Negative |
| B3EWY1 | LIDVKCSASRECWVACKKVT   | Negative |
| B3EWY1 | CSASRECWVACKKVTGSGQG   | Negative |
| B3EWY1 | EAFGLIDVKCSASRECWVAC   | Negative |
| B3EWY1 | ICTEAFGLIDVKCSASRECW   | Negative |
| B3EWY1 | LLIALVICSISICTEAFGLI   | Negative |
| B3EWY1 | VICSISICTEAFGLIDVKCS   | Negative |
| B3EWY1 | LVICSISICTEAFGLIDVKC   | Negative |
| B3EWY1 | IDVKCSASRECWVACKKVTG   | Negative |
| B3EWY1 | LSILLIALVICSISICTEAF   | Negative |
| B3EWY1 | KCSASRECWVACKKVTGSGQ   | Negative |
| B3F051 | KTVAALSFLFIVLFVAQEIA   | Negative |
| B3F051 | TCENLSDSFKGPCIPDGNCN   | Negative |
| B3F051 | VAALSFLFIVLFVAQEIAVT   | Negative |
| B3F051 | SFLFIVLFVAQEIAVTEAKT   | Negative |
| B3F051 | AQEIAVTEAKTCENLSDSFK   | Negative |
| B3F051 | QEIAVTEAKTCENLSDSFKG   | Negative |

|        |                      |          |
|--------|----------------------|----------|
| B3F051 | MEKKTVAALSFLFIVLFVAQ | Negative |
| B3F051 | IAVTEAKTCENLSDSFKGPC | Negative |
| B3F051 | VTEAKTCENLSDSFKGPCIP | Negative |
| B3F051 | LSFLFIVLFVAQEIAVTEAK | Negative |
| B3F051 | EAKTCENLSDSFKGPCIPDG | Negative |
| B3F051 | CENLSDSFKGPCIPDGNCNK | Negative |
| B3F051 | AALSFLFIVLFVAQEIAVTE | Negative |
| B3F051 | AKTCENLSDSFKGPCIPDGN | Negative |
| B3F051 | FLFIVLFVAQEIAVTEAKTC | Negative |
| B3F051 | AVTEAKTCENLSDSFKGPCI | Negative |
| B3F051 | TVAALSFLFIVLFVAQEIAV | Negative |
| B3F051 | LFIVLFVAQEIAVTEAKTCE | Negative |
| B3F051 | VQEIAVTEAKTCENLSDSF  | Negative |
| B3F051 | FVAQEIAVTEAKTCENLSDS | Negative |
| B3F051 | IVLFVAQEIAVTEAKTCENL | Negative |
| B3F051 | TEAKTCENLSDSFKGPCIPD | Negative |
| B3F051 | KTCENLSDSFKGPCIPDGNC | Negative |
| B3F051 | VLFVAQEIAVTEAKTCENLS | Negative |
| B3F051 | ALSFLFIVLFVAQEIAVTEA | Negative |
| B3F051 | EKKTVAALSFLFIVLFVAQE | Negative |
| B3F051 | EIAVTEAKTCENLSDSFKGP | Negative |
| B3F051 | LFVAQEIAVTEAKTCENLSD | Negative |
| B3F051 | KKTVAALSFLFIVLFVAQEI | Negative |
| B3STN5 | ATASFVLSLGFVKAEPTRHH | Negative |
| B3STN5 | LLATASFVLSLGFVKAEPTR | Negative |
| B3STN5 | HDRYAYIERVVCDVNFPDLL | Negative |
| B3STN5 | TRHHDRYAYIERVVCDVNFP | Negative |
| B3STN5 | TASFVLSLGFVKAEPTRHHD | Negative |
| B3STN5 | GFVKAEPTRHHDRYAYIERV | Negative |
| B3STN5 | KAEPTRHHDRYAYIERVVCD | Negative |
| B3STN5 | RYAYIERVVCDVNFPDLLCR | Negative |
| B3STN5 | FVLSLGFVKAEPTRHHDRYA | Negative |
| B3STN5 | DRYAYIERVVCDVNFPDLLC | Negative |
| B3STN5 | VKAEPTRHHDRYAYIERVVC | Negative |
| B3STN5 | HHDRYAYIERVVCDVNFPDL | Negative |
| B3STN5 | ILLATASFVLSLGFVKAEP  | Negative |
| B3STN5 | RHHDRYAYIERVVCDVNFPD | Negative |
| B3STN5 | LGFVKAEPTRHHDRYAYIER | Negative |
| B3STN5 | AEPTRHHDRYAYIERVVCDV | Negative |
| B3STN5 | SLGFVKAEPTRHHDRYAYIE | Negative |
| B3STN5 | YIERVVCDVNFPDLLCRRKS | Negative |
| B3STN5 | VLSLGFVKAEPTRHHDRYAY | Negative |
| B3STN5 | SFVLSLGFVKAEPTRHHDRY | Negative |
| B3STN5 | PTRHHDRYAYIERVVCDVNF | Negative |
| B3STN5 | ASFVLSLGFVKAEPTRHHDR | Negative |
| B3STN5 | MNILLATASFVLSLGFVKA  | Negative |

|        |                       |          |
|--------|-----------------------|----------|
| B3STN5 | LSLGFVKAEPTRHHDRYAYI  | Negative |
| B3STN5 | FVKAEPTRHHDRYAYIERVV  | Negative |
| B3STN5 | YAYIERVVCDVNFDPDLLCRR | Negative |
| B3STN5 | EPTRHHDRYAYIERVVCDVN  | Negative |
| B3STN5 | NILLATASFVLSLGFVKAEP  | Negative |
| B3STN5 | AYIERVVCDVNFDPDLLCRRK | Negative |
| B3STN7 | SIFANNSYDFCDGEFAISEK  | Negative |
| B3STN7 | FCDGEFAISEKDDKCGFSFN  | Negative |
| B3STN7 | IFANNSYDFCDGEFAISEKD  | Negative |
| B3STN7 | EFAISEKDDKCGFSFNPCTL  | Negative |
| B3STN7 | FAISEKDDKCGFSFNPCTLY  | Negative |
| B3STN7 | LAMSYITSIFANNSYDFCDG  | Negative |
| B3STN7 | VILAMSYITSIFANNSYDFC  | Negative |
| B3STN7 | MSYITSIFANNSYDFCDGEF  | Negative |
| B3STN7 | YITSIFANNSYDFCDGEFAI  | Negative |
| B3STN7 | DFCDGEFAISEKDDKCGFSF  | Negative |
| B3STN7 | TSVVILAMSYITSIFANNSY  | Negative |
| B3STN7 | KTSVVILAMSYITSIFANNS  | Negative |
| B3STN7 | GEFAISEKDDKCGFSFNPCT  | Negative |
| B3STN7 | TSIFANNSYDFCDGEFAISE  | Negative |
| B3STN7 | SYITSIFANNSYDFCDGEFA  | Negative |
| B3STN7 | CDGEFAISEKDDKCGFSFNP  | Negative |
| B3STN7 | ANNSYDFCDGEFAISEKDDK  | Negative |
| B3STN7 | NNSYDFCDGEFAISEKDDKC  | Negative |
| B3STN7 | NSYDFCDGEFAISEKDDKCG  | Negative |
| B3STN7 | YDFCDGEFAISEKDDKCGFS  | Negative |
| B3STN7 | MKTSVVILAMSYITSIFANN  | Negative |
| B3STN7 | FANNSYDFCDGEFAISEKDD  | Negative |
| B3STN7 | SYDFCDGEFAISEKDDKCGF  | Negative |
| B3STN7 | AISEKDDKCGFSFNPCTLYK  | Negative |
| B3STN7 | ILAMSYITSIFANNSYDFCD  | Negative |
| B3STN7 | ITSIFANNSYDFCDGEFAIS  | Negative |
| B3STN7 | AMSYITSIFANNSYDFCDGE  | Negative |
| B3STN7 | VVILAMSYITSIFANNSYDF  | Negative |
| B3STN7 | DGEFAISEKDDKCGFSFNPC  | Negative |
| B5AR80 | MFSLLFLAALGSCADDGNPL  | Negative |
| B5AR80 | PLEECFRETDYEEFLEIAKN  | Negative |
| B5AR80 | MNVFFMFSLLFLAALGSCAD  | Negative |
| B5AR80 | SCADDGNPLEECFRETDYEE  | Negative |
| B5AR80 | NPLEECFRETDYEEFLEIAK  | Negative |
| B5AR80 | LFLAALGSCADDGNPLEECF  | Negative |
| B5AR80 | LEECFRETDYEEFLEIAKNG  | Negative |
| B5AR80 | SLLFLAALGSCADDGNPLEE  | Negative |
| B5AR80 | LGSCADDGNPLEECFRETDY  | Negative |
| B5AR80 | FRETDYEEFLEIAKNGLSAT  | Negative |
| B5AR80 | CADDGNPLEECFRETDYEEF  | Negative |

|        |                      |          |
|--------|----------------------|----------|
| B5AR80 | ECFRETDYEEFLEIAKNGLS | Negative |
| B5AR80 | LLFLAALGSCADDGNPLEEC | Negative |
| B5AR80 | RETDYEEFLEIAKNGLSATS | Negative |
| B5AR80 | ALGSCADDGNPLEECFRET  | Negative |
| B5AR80 | VFFMFSLFLAALGSCADDG  | Negative |
| B5AR80 | FMFSLFLAALGSCADDGNP  | Negative |
| B5AR80 | LAALGSCADDGNPLEECFRE | Negative |
| B5AR80 | CFRETDYEEFLEIAKNGLSA | Negative |
| B5AR80 | FLAALGSCADDGNPLEECFR | Negative |
| B5AR80 | AALGSCADDGNPLEECFRET | Negative |
| B5AR80 | NVFFMFSLFLAALGSCADD  | Negative |
| B5AR80 | GSCADDGNPLEECFRET    | Negative |
| B5AR80 | FSLFLAALGSCADDGNPLE  | Negative |
| B5AR80 | DDGNPLEECFRET        | Negative |
| B5AR80 | GNPLEECFRET          | Negative |
| B5AR80 | ADDGNPLEECFRET       | Negative |
| B5AR80 | EECFRET              | Negative |
| B5AR80 | DGNPLEECFRET         | Negative |
| B5LZ79 | LSSREMPGAEARLCRVRGT  | Negative |
| B5LZ79 | ARLCRVRGTRGHCFNDHGC  | Negative |
| B5LZ79 | EMVPGAEARLCRVRGTRGHC | Negative |
| B5LZ79 | LWFMTLVLLLLSSREMPGA  | Negative |
| B5LZ79 | ALWFMTLVLLLLSSREMPG  | Negative |
| B5LZ79 | PGAEARLCRVRGTRGHCFND | Negative |
| B5LZ79 | MTLVLLLLSSREMPGAEAR  | Negative |
| B5LZ79 | SSREMPGAEARLCRVRGTR  | Negative |
| B5LZ79 | FMTLVLLLLSSREMPGAEA  | Negative |
| B5LZ79 | KTALWFMTLVLLLLSSREMP | Negative |
| B5LZ79 | REMPGAEARLCRVRGTRGH  | Negative |
| B5LZ79 | VLLLLSSREMPGAEARLCR  | Negative |
| B5LZ79 | LLSSREMPGAEARLCRVRG  | Negative |
| B5LZ79 | NKTALWFMTLVLLLLSSREM | Negative |
| B5LZ79 | MVPGAEARLCRVRGTRGHCF | Negative |
| B5LZ79 | VLNNKTALWFMTLVLLLLSS | Negative |
| B5LZ79 | MVLNNKTALWFMTLVLLLLS | Negative |
| B5LZ79 | EARLCRVRGTRGHCFNDHGC | Negative |
| B5LZ79 | WFMTLVLLLLSSREMPGAE  | Negative |
| B5LZ79 | TLVLLLLSSREMPGAEARL  | Negative |
| B5LZ79 | LNNKTALWFMTLVLLLLSSR | Negative |
| B5LZ79 | SREMPGAEARLCRVRGTRG  | Negative |
| B5LZ79 | GAEARLCRVRGTRGHCFNDH | Negative |
| B5LZ79 | VPGAEARLCRVRGTRGHCFN | Negative |
| B5LZ79 | AEARLCRVRGTRGHCFNDHG | Negative |
| B5LZ79 | LVLLLLSSREMPGAEARLC  | Negative |
| B5LZ79 | TALWFMTLVLLLLSSREMP  | Negative |
| B5LZ79 | NNKTALWFMTLVLLLLSSRE | Negative |

|        |                       |          |
|--------|-----------------------|----------|
| B5LZ79 | LLLSSREMPVPGAEARLCRVR | Negative |
| B5U6Y4 | IQETGKSPFPSYTSYGCFCG  | Negative |
| B5U6Y4 | AVWLIGVEGSVVELGKMIIQ  | Negative |
| B5U6Y4 | WLIGVEGSVVELGKMIIQET  | Negative |
| B5U6Y4 | ALWIVAVWLIGVEGSVVELG  | Negative |
| B5U6Y4 | ETGKSPFPSYTSYGCFCGGG  | Negative |
| B5U6Y4 | WIVAVWLIGVEGSVVELGKM  | Negative |
| B5U6Y4 | GVEGSVVELGKMIIQETGKS  | Negative |
| B5U6Y4 | VVELGKMIIQETGKSPFPSY  | Negative |
| B5U6Y4 | LGKMIIQETGKSPFPSYTSY  | Negative |
| B5U6Y4 | LIGVEGSVVELGKMIIQETG  | Negative |
| B5U6Y4 | GKSPFPSYTSYGCFCGGGEK  | Negative |
| B5U6Y4 | MIIQETGKSPFPSYTSYGCF  | Negative |
| B5U6Y4 | VEGSVVELGKMIIQETGKSP  | Negative |
| B5U6Y4 | VELGKMIIQETGKSPFPSYT  | Negative |
| B5U6Y4 | ELGKMIIQETGKSPFPSYTS  | Negative |
| B5U6Y4 | IVAVWLIGVEGSVVELGKMI  | Negative |
| B5U6Y4 | VAVWLIGVEGSVVELGKMII  | Negative |
| B5U6Y4 | KMIIQETGKSPFPSYTSYGC  | Negative |
| B5U6Y4 | GKMIIQETGKSPFPSYTSYG  | Negative |
| B5U6Y4 | IIQETGKSPFPSYTSYGCFC  | Negative |
| B5U6Y4 | EGSVVELGKMIIQETGKSPF  | Negative |
| B5U6Y4 | LWIVAVWLIGVEGSVVELGK  | Negative |
| B5U6Y4 | QETGKSPFPSYTSYGCFCGG  | Negative |
| B5U6Y4 | SVVELGKMIIQETGKSPFPS  | Negative |
| B5U6Y4 | TGKSPFPSYTSYGCFCGGGE  | Negative |
| B5U6Y4 | VWLIGVEGSVVELGKMIIQE  | Negative |
| B5U6Y4 | MRALWIVAVWLIGVEGSVVE  | Negative |
| B5U6Y4 | GSVVELGKMIIQETGKSPFP  | Negative |
| B5U6Y4 | IGVEGSVVELGKMIIQETGK  | Negative |
| B5U6Z2 | CLMGVEGHLTQFGDMINKKT  | Negative |
| B5U6Z2 | WIVAVCLMGVEGHLTQFGDM  | Negative |
| B5U6Z2 | VAVCLMGVEGHLTQFGDMIN  | Negative |
| B5U6Z2 | KTGTFGLLSYVYYGCYCGLG  | Negative |
| B5U6Z2 | TGTFGLLSYVYYGCYCGLGG  | Negative |
| B5U6Z2 | MRTLWIVAVCLMGVEGHLTQ  | Negative |
| B5U6Z2 | LTQFGDMINKKTGTFGLLSY  | Negative |
| B5U6Z2 | VEGHLTQFGDMINKKTGTFG  | Negative |
| B5U6Z2 | FGDMINKKTGTFGLLSYVYY  | Negative |
| B5U6Z2 | NKKTGTFGLLSYVYYGCYCG  | Negative |
| B5U6Z2 | GHLTQFGDMINKKTGTFGLL  | Negative |
| B5U6Z2 | GTFGLLSYVYYGCYCGLGK   | Negative |
| B5U6Z2 | EGHLTQFGDMINKKTGTFGL  | Negative |
| B5U6Z2 | LWIVAVCLMGVEGHLTQFGD  | Negative |
| B5U6Z2 | KKTGTFGLLSYVYYGCYCGL  | Negative |
| B5U6Z2 | HLTQFGDMINKKTGTFGLLS  | Negative |

|        |                        |          |
|--------|------------------------|----------|
| B5U6Z2 | IVAVCLMGVEGHLTQFGDMI   | Negative |
| B5U6Z2 | INKKTGTFGLLSYVYYGCYC   | Negative |
| B5U6Z2 | AVCLMGVEGHLTQFGDMINK   | Negative |
| B5U6Z2 | TQFGDMINKKTGTFGLLSYV   | Negative |
| B5U6Z2 | QFGDMINKKTGTFGLLSYVY   | Negative |
| B5U6Z2 | TLWIVAVCLMGVEGHLTQFG   | Negative |
| B5U6Z2 | MGVEGHLTQFGDMINKKTGT   | Negative |
| B5U6Z2 | DMINKKTGTFGLLSYVYYGC   | Negative |
| B5U6Z2 | MINKKTGTFGLLSYVYYGCY   | Negative |
| B5U6Z2 | VCLMGVEGHLTQFGDMINKK   | Negative |
| B5U6Z2 | GDMINKKTGTFGLLSYVYYG   | Negative |
| B5U6Z2 | GVEGHLTQFGDMINKKTGTF   | Negative |
| B5U6Z2 | LMGVEGHLTQFGDMINKKTG   | Negative |
| B6RLX2 | MSSGRLLLLGLLTLWAELT    | Negative |
| B6RLX2 | LTPVSGLGRP KFCELP AVSG | Negative |
| B6RLX2 | RPKFCELP AVSGFCKAYIPS  | Negative |
| B6RLX2 | GRP KFCELP AVSGFCKAYIP | Negative |
| B6RLX2 | TPVSGLGRP KFCELP AVSGF | Negative |
| B6RLX2 | LTLWAELTPVSGLGRP KFCE  | Negative |
| B6RLX2 | LLLGLLTLWAELTPVSGLG    | Negative |
| B6RLX2 | PKFCELP AVSGFCKAYIPSF  | Negative |
| B6RLX2 | LGLLTLWAELTPVSGLGRP K  | Negative |
| B6RLX2 | FCELP AVSGFCKAYIPSFYY  | Negative |
| B6RLX2 | RLLLLLGLLTLWAELTPVSG   | Negative |
| B6RLX2 | SGRLLLLGLLTLWAELTPV    | Negative |
| B6RLX2 | TLWAELTPVSGLGRP KFCELP | Negative |
| B6RLX2 | GRLLLLGLLTLWAELTPVS    | Negative |
| B6RLX2 | AELTPVSGLGRP KFCELP AV | Negative |
| B6RLX2 | LWAELTPVSGLGRP KFCELP  | Negative |
| B6RLX2 | SSGRLLLLGLLTLWAELTP    | Negative |
| B6RLX2 | VSGLGRP KFCELP AVSGFCK | Negative |
| B6RLX2 | LLTLWAELTPVSGLGRP KF   | Negative |
| B6RLX2 | WAELTPVSGLGRP KFCELP A | Negative |
| B6RLX2 | ELTPVSGLGRP KFCELP AVS | Negative |
| B6RLX2 | GLGRP KFCELP AVSGFCKAY | Negative |
| B6RLX2 | LLLGLLTLWAELTPVSGLGR   | Negative |
| B6RLX2 | SGLGRP KFCELP AVSGFCKA | Negative |
| B6RLX2 | PVSGLGRP KFCELP AVSGFC | Negative |
| B6RLX2 | LGRP KFCELP AVSGFCKAYI | Negative |
| B6RLX2 | LLLLLGLLTLWAELTPVSGL   | Negative |
| B6RLX2 | KFCELP AVSGFCKAYIPSFY  | Negative |
| B6RLX2 | LLGLLTLWAELTPVSGLGRP   | Negative |
| B7FDP2 | GCKYGCLLLGKNEGCDKECK   | Negative |
| B7FDP2 | ACFFLIGTVWAKEGYLVNKS   | Negative |
| B7FDP2 | FFLIGTVWAKEGYLVNKSTG   | Negative |
| B7FDP2 | NKSTGCKYGCLLLGKNEGCD   | Negative |

|        |                      |          |
|--------|----------------------|----------|
| B7FDP2 | GTVWAKEGYLVNKSTGCKYG | Negative |
| B7FDP2 | SLLMITACFFLIGTVWAKEG | Negative |
| B7FDP2 | TACFFLIGTVWAKEGYLVNK | Negative |
| B7FDP2 | VNKSTGCKYGCLLLGKNEGC | Negative |
| B7FDP2 | MNSLLMITACFFLIGTVWAK | Negative |
| B7FDP2 | YLVNKSTGCKYGCLLLGKNE | Negative |
| B7FDP2 | WAKEGYLVNKSTGCKYGCLL | Negative |
| B7FDP2 | TGCKYGCLLLGKNEGCDKEC | Negative |
| B7FDP2 | EGYLVNKSTGCKYGCLLLGK | Negative |
| B7FDP2 | STGCKYGCLLLGKNEGCDKE | Negative |
| B7FDP2 | LVNKSTGCKYGCLLLGKNEG | Negative |
| B7FDP2 | MITACFFLIGTVWAKEGYLV | Negative |
| B7FDP2 | KSTGCKYGCLLLGKNEGCDK | Negative |
| B7FDP2 | FLIGTVWAKEGYLVNKSTGC | Negative |
| B7FDP2 | AKEGYLVNKSTGCKYGCLLL | Negative |
| B7FDP2 | KEGYLVNKSTGCKYGCLLLG | Negative |
| B7FDP2 | VWAKEGYLVNKSTGCKYGCL | Negative |
| B7FDP2 | CFFLIGTVWAKEGYLVNKST | Negative |
| B7FDP2 | LLMITACFFLIGTVWAKEGY | Negative |
| B7FDP2 | ITACFFLIGTVWAKEGYLVN | Negative |
| B7FDP2 | IGTVWAKEGYLVNKSTGCKY | Negative |
| B7FDP2 | NSLLMITACFFLIGTVWAKE | Negative |
| B7FDP2 | GYLVNKSTGCKYGCLLLGKN | Negative |
| B7FDP2 | LIGTVWAKEGYLVNKSTGCK | Negative |
| B7FDP2 | TVWAKEGYLVNKSTGCKYGC | Negative |
| B7JAQ0 | VGAAAALAATVGMGTAMAGT | Negative |
| B7JAQ0 | ALAATVGMGTAMAGTLDTTW | Negative |
| B7JAQ0 | WYVTVGAAAALAATVGMGTA | Negative |
| B7JAQ0 | LAATVGMGTAMAGTLDTTWK | Negative |
| B7JAQ0 | KKNWYVTVGAAAALAATVGM | Negative |
| B7JAQ0 | TAMAGTLDTTWKEATLPQVK | Negative |
| B7JAQ0 | TMKKNWYVTVGAAAALAATV | Negative |
| B7JAQ0 | ATVGMGTAMAGTLDTTWKEA | Negative |
| B7JAQ0 | MYTQNTMKKNWYVTVGAAAA | Negative |
| B7JAQ0 | TVGAAAALAATVGMGTAMAG | Negative |
| B7JAQ0 | MKKNWYVTVGAAAALAATVG | Negative |
| B7JAQ0 | QNTMKKNWYVTVGAAAALAA | Negative |
| B7JAQ0 | AALAATVGMGTAMAGTLDTT | Negative |
| B7JAQ0 | AMAGTLDTTWKEATLPQVKA | Negative |
| B7JAQ0 | TQNTMKKNWYVTVGAAAALA | Negative |
| B7JAQ0 | TVGMGTAMAGTLDTTWKEAT | Negative |
| B7JAQ0 | AAAALAATVGMGTAMAGTLD | Negative |
| B7JAQ0 | YTQNTMKKNWYVTVGAAAAL | Negative |
| B7JAQ0 | GTAMAGTLDTTWKEATLPQV | Negative |
| B7JAQ0 | GMGTAMAGTLDTTWKEATLP | Negative |
| B7JAQ0 | VTVGAAAALAATVGMGTAMA | Negative |

|        |                      |          |
|--------|----------------------|----------|
| B7JAQ0 | GAAAALAATVGMGTAMAGTL | Negative |
| B7JAQ0 | NWYVTVGAAAALAATVGMGT | Negative |
| B7JAQ0 | AATVGMGTAMAGTLDTTWKE | Negative |
| B7JAQ0 | VGMGTAMAGTLDTTWKEATL | Negative |
| B7JAQ0 | KNWYVTVGAAAALAATVGMG | Negative |
| B7JAQ0 | YVTVGAAAALAATVGMGTAM | Negative |
| B7JAQ0 | MGTAMAGTLDTTWKEATLPQ | Negative |
| B7JAQ0 | NTMKKNWYVTVGAAAALAAT | Negative |
| B7S4N9 | TLWEVLTPVSSKDRPKFCHL | Negative |
| B7S4N9 | LLGLLTLWEVLTPVSSKDRP | Negative |
| B7S4N9 | SSGLLLLLLGLLTLWEVLTP | Negative |
| B7S4N9 | MSSGLLLLLLGLLTLWEVLT | Negative |
| B7S4N9 | VLTPVSSKDRPKFCHLPPKP | Negative |
| B7S4N9 | KFCHLPPKPGPCRAAIPRFY | Negative |
| B7S4N9 | LLLGLLTLWEVLTPVSSKD  | Negative |
| B7S4N9 | LTPVSSKDRPKFCHLPPKPG | Negative |
| B7S4N9 | VSSKDRPKFCHLPPKPGPCR | Negative |
| B7S4N9 | SSKDRPKFCHLPPKPGPCRA | Negative |
| B7S4N9 | GGLLLLLGLLTLWEVLTPVS | Negative |
| B7S4N9 | EVLTPVSSKDRPKFCHLPPK | Negative |
| B7S4N9 | RPKFCHLPPKPGPCRAAIPR | Negative |
| B7S4N9 | LWEVLTPVSSKDRPKFCHLP | Negative |
| B7S4N9 | DRPKFCHLPPKPGPCRAAIP | Negative |
| B7S4N9 | SKDRPKFCHLPPKPGPCRAA | Negative |
| B7S4N9 | LLLGLLTLWEVLTPVSSKDR | Negative |
| B7S4N9 | LTLWEVLTPVSSKDRPKFCH | Negative |
| B7S4N9 | SGGLLLLLGLLTLWEVLTPV | Negative |
| B7S4N9 | TPVSSKDRPKFCHLPPKPGP | Negative |
| B7S4N9 | LLLLLGLLTLWEVLTPVSSK | Negative |
| B7S4N9 | KDRPKFCHLPPKPGPCRAAI | Negative |
| B7S4N9 | GLLTLWEVLTPVSSKDRPKF | Negative |
| B7S4N9 | PVSSKDRPKFCHLPPKPGPC | Negative |
| B7S4N9 | GLLLLLGLLTLWEVLTPVSS | Negative |
| B7S4N9 | PKFCHLPPKPGPCRAAIPRF | Negative |
| B7S4N9 | FCHLPPKPGPCRAAIPRFYY | Negative |
| B7S4N9 | WEVLTPVSSKDRPKFCHLPP | Negative |
| B7S4N9 | LLTLWEVLTPVSSKDRPKFC | Negative |
| B7SNV8 | VDHANCKYECWYDDKYCDDL | Negative |
| B7SNV8 | GKKDGYPVDHANCKYECWYD | Negative |
| B7SNV8 | ANCKYECWYDDKYCDDLCKK | Negative |
| B7SNV8 | TLASLLALGVNGKKDGYPVD | Negative |
| B7SNV8 | HANCKYECWYDDKYCDDLCK | Negative |
| B7SNV8 | LLVLTLASLLALGVNGKKDG | Negative |
| B7SNV8 | YPVDHANCKYECWYDDKYCD | Negative |
| B7SNV8 | DHANCKYECWYDDKYCDDLC | Negative |
| B7SNV8 | ASLLALGVNGKKDGYPVDHA | Negative |



|        |                        |          |
|--------|------------------------|----------|
| B7SNV8 | LGVNGKKDGY PVDHANCKYE  | Negative |
| B7SNV8 | VLTLASLLALGVNGKKDGY P  | Negative |
| B7SNV8 | YLLVLTLASLLALGVNGKKD   | Negative |
| B7SNV8 | KKDGY PVDHANCKYECWYDD  | Negative |
| B7SNV8 | PVDHANCKYECWYDDKYCDD   | Negative |
| B7SNV8 | KDGY PVDHANCKYECWYDDK  | Negative |
| B7SNV8 | GVNGKKDGY PVDHANCKYEC  | Negative |
| B7SNV8 | NYLLVLTLASLLALGVNGKK   | Negative |
| B7SNV8 | NGKKDGY PVDHANCKYECWY  | Negative |
| B7SNV8 | LASLLALGVNGKKDGY PVDH  | Negative |
| B7SNV8 | LLALGVNGKKDGY PVDHANC  | Negative |
| B7SNV8 | DGY PVDHANCKYECWYDDKY  | Negative |
| B7SNV8 | LTLASLLALGVNGKKDGY PV  | Negative |
| B7SNV8 | MNYLLVLTLASLLALGVNGK   | Negative |
| B7SNV8 | ALGVNGKKDGY PVDHANCKY  | Negative |
| B7SNV8 | GY PVDHANCKYECWYDDKYC  | Negative |
| B7SNV8 | LALGVNGKKDGY PVDHANCK  | Negative |
| B7SNV8 | NCKYECWYDDKYCDDLCKKR   | Negative |
| B7SNV8 | SLLALGVNGKKDGY PVDHAN  | Negative |
| B7SNV8 | VNGKKDGY PVDHANCKYECW  | Negative |
| B7ZS96 | HASHGEADSKCPLMVKV LDA  | Negative |
| B7ZS96 | AIVSEAAPPGHASHGEADSK   | Negative |
| B7ZS96 | FLLLALLAIVSEAAPPGHAS   | Negative |
| B7ZS96 | ASHGEADSKCPLMVKV L DAV | Negative |
| B7ZS96 | FKSFLLLALLAIVSEAAPPG   | Negative |
| B7ZS96 | EADSKCPLMVKV L DAVRGIP | Negative |
| B7ZS96 | AAPPGHASHGEADSKCPLMV   | Negative |
| B7ZS96 | IVSEAAPPGHASHGEADSKC   | Negative |
| B7ZS96 | HGEADSKCPLMVKV L DAVRG | Negative |
| B7ZS96 | ADSKCPLMVKV L DAVRGIPA | Negative |
| B7ZS96 | PGHASHGEADSKCPLMVKV L  | Negative |
| B7ZS96 | SFKSFLLLALLAIVSEAAPP   | Negative |
| B7ZS96 | PPGHASHGEADSKCPLMVKV   | Negative |
| B7ZS96 | LALLAIVSEAAPPGHASHGE   | Negative |
| B7ZS96 | MASFKSFLLLALLAIVSEAA   | Negative |
| B7ZS96 | LLLALLAIVSEAAPPGHASH   | Negative |
| B7ZS96 | GEADSKCPLMVKV L DAVRGI | Negative |
| B7ZS96 | VSEAAPPGHASHGEADSKCP   | Negative |
| B7ZS96 | LLAIVSEAAPPGHASHGEAD   | Negative |
| B7ZS96 | GHASHGEADSKCPLMVKV L D | Negative |
| B7ZS96 | EAAPPGHASHGEADSKCPLM   | Negative |
| B7ZS96 | APPGHASHGEADSKCPLMVK   | Negative |
| B7ZS96 | LLALLAIVSEAAPPGHASHG   | Negative |
| B7ZS96 | ASFKSFLLLALLAIVSEAAP   | Negative |
| B7ZS96 | SHGEADSKCPLMVKV L DAVR | Negative |
| B7ZS96 | SEAAPPGHASHGEADSKCPL   | Negative |

|        |                      |          |
|--------|----------------------|----------|
| B7ZS96 | LAIVSEAAPPGHASHGEADS | Negative |
| B7ZS96 | ALLAIVSEAAPPGHASHGEA | Negative |
| B7ZS96 | SFLLLALLAIVSEAAPPGHA | Negative |
| B8AL97 | SMARSQLAALLISLCFLSLA | Negative |
| B8AL97 | ALLISLCFLSLASNAVGWSR | Negative |
| B8AL97 | KTSSSMARSQLAALLISLCF | Negative |
| B8AL97 | KKKTSSSMARSQLAALLISL | Negative |
| B8AL97 | SQLAALLISLCFLSLASNAV | Negative |
| B8AL97 | TSSSMARSQLAALLISLCFL | Negative |
| B8AL97 | LSLASNAVGWSRRGEREEED | Negative |
| B8AL97 | CFLSLASNAVGWSRRGEREE | Negative |
| B8AL97 | ASNAVGWSRRGEREEEDERR | Negative |
| B8AL97 | MARSQLAALLISLCFLSLAS | Negative |
| B8AL97 | ARSQLAALLISLCFLSLASN | Negative |
| B8AL97 | LCFLSLASNAVGWSRRGERE | Negative |
| B8AL97 | KKTSSSMARSQLAALLISLC | Negative |
| B8AL97 | SSSMARSQLAALLISLCFLS | Negative |
| B8AL97 | LAALLISLCFLSLASNAVGW | Negative |
| B8AL97 | LLISLCFLSLASNAVGWSRR | Negative |
| B8AL97 | MAKKKTSSSMARSQLAALLI | Negative |
| B8AL97 | SNAVGWSRRGEREEEDERRR | Negative |
| B8AL97 | SSMARSQLAALLISLCFLSL | Negative |
| B8AL97 | NAVGWSRRGEREEEDERRRH | Negative |
| B8AL97 | QLAALLISLCFLSLASNAVG | Negative |
| B8AL97 | SLCFLSLASNAVGWSRRGER | Negative |
| B8AL97 | LASNAVGWSRRGEREEEDER | Negative |
| B8AL97 | FLSLASNAVGWSRRGEREEE | Negative |
| B8AL97 | SLASNAVGWSRRGEREEEDE | Negative |
| B8AL97 | AALLISLCFLSLASNAVGWS | Negative |
| B8AL97 | LISLCFLSLASNAVGWSRRG | Negative |
| B8AL97 | AKKKTSSSMARSQLAALLIS | Negative |
| B8AL97 | RSQLAALLISLCFLSLASNA | Negative |
| B8M9H9 | AWLLPTVFAASLTQVSNFGD | Negative |
| B8M9H9 | TQVSNFGDNPGSLQMYIYVP | Negative |
| B8M9H9 | LVLLLAWLLPTVFAASLTQV | Negative |
| B8M9H9 | WLLPTVFAASLTQVSNFGDN | Negative |
| B8M9H9 | PTVFAASLTQVSNFGDNPGS | Negative |
| B8M9H9 | GDNPGSLQMYIYVPNNLASK | Negative |
| B8M9H9 | SNFGDNPGSLQMYIYVPNNL | Negative |
| B8M9H9 | AASLTQVSNFGDNPGSLQMY | Negative |
| B8M9H9 | VLLLAWLLPTVFAASLTQVS | Negative |
| B8M9H9 | SLTQVSNFGDNPGSLQMYIY | Negative |
| B8M9H9 | LLLAWLLPTVFAASLTQVSN | Negative |
| B8M9H9 | LLAWLLPTVFAASLTQVSNF | Negative |
| B8M9H9 | NFGDNPGSLQMYIYVPNNLA | Negative |
| B8M9H9 | AIPLVLLLAWLLPTVFAASL | Negative |

|        |                      |          |
|--------|----------------------|----------|
| B8M9H9 | LPTVFAASLTQVSNFGDNPG | Negative |
| B8M9H9 | FGDNPGSLQMYIYVPNNLAS | Negative |
| B8M9H9 | QVSNFGDNPGSLQMYIYVPN | Negative |
| B8M9H9 | LAWLLPTVFAASLTQVSNFG | Negative |
| B8M9H9 | MAIPLVLLLAWLLPTVFAAS | Negative |
| B8M9H9 | DNPGSLQMYIYVPNNLASKP | Negative |
| B8M9H9 | LTQVSNFGDNPGSLQMYIYV | Negative |
| B8M9H9 | LLPTVFAASLTQVSNFGDNP | Negative |
| B8M9H9 | ASLTQVSNFGDNPGSLQMYI | Negative |
| B8M9H9 | VSNFGDNPGSLQMYIYVPNN | Negative |
| B8M9H9 | IPLVLLLAWLLPTVFAASLT | Negative |
| B8M9H9 | TVFAASLTQVSNFGDNPGSL | Negative |
| B8M9H9 | NPGSLQMYIYVPNNLASKPA | Negative |
| B8M9H9 | FAASLTQVSNFGDNPGSLQM | Negative |
| B8M9H9 | VFAASLTQVSNFGDNPGSLQ | Negative |
| B9A8D7 | CKNTICDASHDLECHRGQCT | Negative |
| B9A8D7 | NTICDASHDLECHRGQCTCV | Negative |
| B9A8D7 | YTAAETCSADGDCKNTICDA | Negative |
| B9A8D7 | CSADGDCKNTICDASHDLEC | Negative |
| B9A8D7 | SADGDCKNTICDASHDLECH | Negative |
| B9A8D7 | ETCSADGDCKNTICDASHDL | Negative |
| B9A8D7 | LCFVCYTAAETCSADGDCKN | Negative |
| B9A8D7 | DGDCKNTICDASHDLECHRG | Negative |
| B9A8D7 | AAETCSADGDCKNTICDASH | Negative |
| B9A8D7 | DCKNTICDASHDLECHRGQC | Negative |
| B9A8D7 | TCSADGDCKNTICDASHDLE | Negative |
| B9A8D7 | KNTICDASHDLECHRGQCTC | Negative |
| B9A8D7 | FVCYTAAETCSADGDCKNTI | Negative |
| B9A8D7 | MKVAVVVALLCFVCYTAAET | Negative |
| B9A8D7 | GDCKNTICDASHDLECHRGQ | Negative |
| B9A8D7 | CFVCYTAAETCSADGDCKNT | Negative |
| B9A8D7 | VVALLCFVCYTAAETCSAD  | Negative |
| B9A8D7 | ADGDCKNTICDASHDLECHR | Negative |
| B9A8D7 | VAVVVALLCFVCYTAAETCS | Negative |
| B9A8D7 | KVAVVVALLCFVCYTAAETC | Negative |
| B9A8D7 | TICDASHDLECHRGQCTCVN | Negative |
| B9A8D7 | CYTAAETCSADGDCKNTICD | Negative |
| B9A8D7 | VCYTAAETCSADGDCKNTIC | Negative |
| B9A8D7 | VALLCFVCYTAAETCSADGD | Negative |
| B9A8D7 | AETCSADGDCKNTICDASHD | Negative |
| B9A8D7 | LLCFVCYTAAETCSADGDCK | Negative |
| B9A8D7 | VVALLCFVCYTAAETCSADG | Negative |
| B9A8D7 | TAAETCSADGDCKNTICDAS | Negative |
| B9A8D7 | ALLCFVCYTAAETCSADGDC | Negative |
| C0HJQ4 | SMIIGICEGREIPVKCKGSK | Negative |
| C0HJQ4 | EGREIPVKCKGSKQCLQSCK | Negative |

|        |                      |          |
|--------|----------------------|----------|
| C0HJQ4 | GICEGREIPVKCKGSKQCLQ | Negative |
| C0HJQ4 | CSMIIGICEGREIPVKCKGS | Negative |
| C0HJQ4 | IGICEGREIPVKCKGSKQCL | Negative |
| C0HJQ4 | MFFTVLVTLFVCSMIIGICE | Negative |
| C0HJQ4 | FTVLVTLFVCSMIIGICEGR | Negative |
| C0HJQ4 | TLFVCSMIIGICEGREIPVK | Negative |
| C0HJQ4 | MIIGICEGREIPVKCKGSKQ | Negative |
| C0HJQ4 | ICEGREIPVKCKGSKQCLQS | Negative |
| C0HJQ4 | VKCKGSKQCLQSCKEAGMTY | Negative |
| C0HJQ4 | LVTLFVCSMIIGICEGREIP | Negative |
| C0HJQ4 | FVCSMIIGICEGREIPVKCK | Negative |
| C0HJQ4 | GREIPVKCKGSKQCLQSCKE | Negative |
| C0HJQ4 | LFVCSMIIGICEGREIPVKC | Negative |
| C0HJQ4 | FFTVLVTLFVCSMIIGICEG | Negative |
| C0HJQ4 | IPVKCKGSKQCLQSCKEAGM | Negative |
| C0HJQ4 | TVLVTLFVCSMIIGICEGRE | Negative |
| C0HJQ4 | IIGICEGREIPVKCKGSKQC | Negative |
| C0HJQ4 | VCSMIIGICEGREIPVKCKG | Negative |
| C0HJQ4 | PVKCKGSKQCLQSCKEAGMT | Negative |
| C0HJQ4 | VLVTLFVCSMIIGICEGREI | Negative |
| C0HJQ4 | EIPVKCKGSKQCLQSCKEAG | Negative |
| C0HJQ4 | CEGREIPVKCKGSKQCLQSC | Negative |
| C0HJQ4 | MKMFFTVLVTLFVCSMIIGI | Negative |
| C0HJQ4 | KMFFTVLVTLFVCSMIIGIC | Negative |
| C0HJQ4 | KCKGSKQCLQSCKEAGMTYG | Negative |
| C0HJQ4 | CKGSKQCLQSCKEAGMTYGK | Negative |
| C0HJQ4 | REIPVKCKGSKQCLQSCKEA | Negative |
| C0HJQ5 | VIMTIMPDMKVEAVSCEDCP | Negative |
| C0HJQ5 | IMPDMKVEAVSCEDCPPHCA | Negative |
| C0HJQ5 | PDMKVEAVSCEDCPPHCATK | Negative |
| C0HJQ5 | EAVSCEDCPPHCATKDQRAK | Negative |
| C0HJQ5 | ALVFNVIMTIMPDMKVEAVS | Negative |
| C0HJQ5 | IALVFNVIMTIMPDMKVEAV | Negative |
| C0HJQ5 | RLYAILIALVFNVIMTIMP  | Negative |
| C0HJQ5 | LYAILIALVFNVIMTIMPD  | Negative |
| C0HJQ5 | IMTIMPDMKVEAVSCEDCPP | Negative |
| C0HJQ5 | NVIMTIMPDMKVEAVSCEDC | Negative |
| C0HJQ5 | VEAVSCEDCPPHCATKDQRA | Negative |
| C0HJQ5 | MPDMKVEAVSCEDCPPHCAT | Negative |
| C0HJQ5 | AVSCEDCPPHCATKDQRAKC | Negative |
| C0HJQ5 | MTIMPDMKVEAVSCEDCPPH | Negative |
| C0HJQ5 | LIALVFNVIMTIMPDMKVEA | Negative |
| C0HJQ5 | MSRLYAILIALVFNVIMTI  | Negative |
| C0HJQ5 | KVEAVSCEDCPPHCATKDQR | Negative |
| C0HJQ5 | ILIALVFNVIMTIMPDMKVE | Negative |
| C0HJQ5 | SRLYAILIALVFNVIMTIM  | Negative |

|        |                       |          |
|--------|-----------------------|----------|
| C0HJQ5 | MKVEAVSCEDCPPHCATKDQ  | Negative |
| C0HJQ5 | SCEDCPPHCATKDQRAKCEN  | Negative |
| C0HJQ5 | LVFNVIMTIMPDMKVEAVSC  | Negative |
| C0HJQ5 | TIMPDMKVEAVSCEDCPPHC  | Negative |
| C0HJQ5 | YAILIALVFNVIMTIMPDM   | Negative |
| C0HJQ5 | VFNVIMTIMPDMKVEAVSCE  | Negative |
| C0HJQ5 | AAILIALVFNVIMTIMPDMK  | Negative |
| C0HJQ5 | VSCEDCPPHCATKDQRAKCE  | Negative |
| C0HJQ5 | DMKVEAVSCEDCPPHCATKD  | Negative |
| C0HJQ5 | IILIALVFNVIMTIMPDMKV  | Negative |
| C0HJQ8 | LALVICSIGWSEAQFTDVKC  | Negative |
| C0HJQ8 | WSEAQFTDVKCTGTKQCWPV  | Negative |
| C0HJQ8 | EAQFTDVKCTGTKQCWPVCK  | Negative |
| C0HJQ8 | LVICSIGWSEAQFTDVKCTG  | Negative |
| C0HJQ8 | SEAQFTDVKCTGTKQCWPVC  | Negative |
| C0HJQ8 | VICSIGWSEAQFTDVKCTGT  | Negative |
| C0HJQ8 | MKISFLLLLALVICSIGWSE  | Negative |
| C0HJQ8 | KCTGTKQCWPVCKKMFGRPN  | Negative |
| C0HJQ8 | QFTDVKCTGTKQCWPVCKKM  | Negative |
| C0HJQ8 | GTKQCWPVCKKMFGRPNGKC  | Negative |
| C0HJQ8 | KISFLLLLALVICSIGWSEA  | Negative |
| C0HJQ8 | VKCTGTKQCWPVCKKMFGRP  | Negative |
| C0HJQ8 | TDVKCTGTKQCWPVCKKMF   | Negative |
| C0HJQ8 | LLALVICSIGWSEAQFTDVK  | Negative |
| C0HJQ8 | DVKCTGTKQCWPVCKKMFGR  | Negative |
| C0HJQ8 | GWSEAQFTDVKCTGTKQCWP  | Negative |
| C0HJQ8 | CTGTKQCWPVCKKMFGRPNG  | Negative |
| C0HJQ8 | TGTKQCWPVCKKMFGRPNGK  | Negative |
| C0HJQ8 | CSIGWSEAQFTDVKCTGTKQ  | Negative |
| C0HJQ8 | FTDVKCTGTKQCWPVCKKMF  | Negative |
| C0HJQ8 | SFLLLLALVICSIGWSEAQF  | Negative |
| C0HJQ8 | ISFLLLLALVICSIGWSEAQ  | Negative |
| C0HJQ8 | ALVICSIGWSEAQFTDVKCT  | Negative |
| C0HJQ8 | AQFTDVKCTGTKQCWPVCKK  | Negative |
| C0HJQ8 | IGWSEAQFTDVKCTGTKQCW  | Negative |
| C0HJQ8 | ICSIGWSEAQFTDVKCTGTK  | Negative |
| C0HJQ8 | LLLLALVICSIGWSEAQFTD  | Negative |
| C0HJQ8 | FLLLLLALVICSIGWSEAQFT | Negative |
| C0HJQ8 | SIGWSEAQFTDVKCTGTKQC  | Negative |
| C0HJZ1 | CLNLSDKFKGPCLGTKNCDH  | Negative |
| C0HJZ1 | LAQEYGVEGKVCLNLSDKFK  | Negative |
| C0HJZ1 | FLAQEYGVEGKVCLNLSDKF  | Negative |
| C0HJZ1 | LVLFLAQEYGVEGKVCLNLS  | Negative |
| C0HJZ1 | VLFLAQEYGVEGKVCLNLS   | Negative |
| C0HJZ1 | AQEYGVEGKVCLNLSDKFKG  | Negative |
| C0HJZ1 | QEYGVEGKVCLNLSDKFKGP  | Negative |

|        |                      |          |
|--------|----------------------|----------|
| C0HJZ1 | FCIFFLVFLAQEYGVGK    | Negative |
| C0HJZ1 | IFFLVFLAQEYGVGK      | Negative |
| C0HJZ1 | GVEGKVCLNLSKFKG      | Negative |
| C0HJZ1 | CIFFLVFLAQEYGVGK     | Negative |
| C0HJZ1 | KVCLNLSKFKG          | Negative |
| C0HJZ1 | KKMAGFCIFFLVFLAQEY   | Negative |
| C0HJZ1 | LNLSKFKG             | Negative |
| C0HJZ1 | GFCIFFLVFLAQEYGVGK   | Negative |
| C0HJZ1 | EKKMAGFCIFFLVFLAQEY  | Negative |
| C0HJZ1 | MEKKMAGFCIFFLVFLAQE  | Negative |
| C0HJZ1 | YGVEGKVCLNLSKFKG     | Negative |
| C0HJZ1 | VEGKVCLNLSKFKG       | Negative |
| C0HJZ1 | EGKVCLNLSKFKG        | Negative |
| C0HJZ1 | EYGVGKVCLNLSKFKG     | Negative |
| C0HJZ1 | FLVLFLAQEYGVGKVCLN   | Negative |
| C0HJZ1 | NLSKFKG              | Negative |
| C0HJZ1 | LFLAQEYGVGKVCLNLSK   | Negative |
| C0HJZ1 | AGFCIFFLVFLAQEYGVG   | Negative |
| C0HJZ1 | MAGFCIFFLVFLAQEYGV   | Negative |
| C0HJZ1 | GKVCLNLSKFKG         | Negative |
| C0HJZ1 | KMAGFCIFFLVFLAQEYGV  | Negative |
| C0HJZ1 | VCLNLSKFKG           | Negative |
| C0K3N1 | YLLAVAILFCIQGWPSGTVQ | Negative |
| C0K3N1 | RPFMEVYQRSVCQPRETLVS | Negative |
| C0K3N1 | MEVYQRSVCQPRETLVSILE | Negative |
| C0K3N1 | EVRPFMEVYQRSVCQPRETL | Negative |
| C0K3N1 | AILFCIQGWPSGTVQGEVRP | Negative |
| C0K3N1 | GTVQGEVRPFMEVYQRSVCQ | Negative |
| C0K3N1 | GEVRPFMEVYQRSVCQPRET | Negative |
| C0K3N1 | VQGEVRPFMEVYQRSVCQPR | Negative |
| C0K3N1 | PFMEVYQRSVCQPRETLVSI | Negative |
| C0K3N1 | VAILFCIQGWPSGTVQGEVR | Negative |
| C0K3N1 | IQGWPSGTVQGEVRPFMEVY | Negative |
| C0K3N1 | PSGTVQGEVRPFMEVYQRSV | Negative |
| C0K3N1 | WPSGTVQGEVRPFMEVYQRS | Negative |
| C0K3N1 | CIQGWPSGTVQGEVRPFMEV | Negative |
| C0K3N1 | LAVAILFCIQGWPSGTVQGE | Negative |
| C0K3N1 | TVQGEVRPFMEVYQRSVCQP | Negative |
| C0K3N1 | QGEVRPFMEVYQRSVCQPRE | Negative |
| C0K3N1 | LFCIQGWPSGTVQGEVRPFM | Negative |
| C0K3N1 | AYLLAVAILFCIQGWPSGTV | Negative |
| C0K3N1 | GWPSGTVQGEVRPFMEVYQR | Negative |
| C0K3N1 | LLAVAILFCIQGWPSGTVQG | Negative |
| C0K3N1 | AVAILFCIQGWPSGTVQGEV | Negative |
| C0K3N1 | QGWPSTVQGEVRPFMEVYQ  | Negative |
| C0K3N1 | FMEVYQRSVCQPRETLVSIL | Negative |

|        |                      |          |
|--------|----------------------|----------|
| C0K3N1 | FCIQGWPSGTVQGEVRPFME | Negative |
| C0K3N1 | VRPFMEVYQRSVCQPRETLV | Negative |
| C0K3N1 | MAAYLLAVAILFCIQGWPSG | Negative |
| C0K3N1 | AAYLLAVAILFCIQGWPSGT | Negative |
| C0K3N1 | SGTVQGEVRPFMEVYQRSVC | Negative |
| C1IC47 | FVCHNQQSSQPPTTTNCSGG | Negative |
| C1IC47 | LGHTFVCHNQQSSQPPTTN  | Negative |
| C1IC47 | LDLGHTFVCHNQQSSQPPTT | Negative |
| C1IC47 | HNQQSSQPPTTTNCSGGENK | Negative |
| C1IC47 | NQQSSQPPTTTNCSGGENKC | Negative |
| C1IC47 | VVTIVCLDLGHTFVCHNQQS | Negative |
| C1IC47 | TLLLTLVVVTIVCLDLGHTF | Negative |
| C1IC47 | IVCLDLGHTFVCHNQQSSQP | Negative |
| C1IC47 | DLGHTFVCHNQQSSQPPTTT | Negative |
| C1IC47 | VVVTIVCLDLGHTFVCHNQQ | Negative |
| C1IC47 | LTLVVVTIVCLDLGHTFVCH | Negative |
| C1IC47 | CLDLGHTFVCHNQQSSQPPT | Negative |
| C1IC47 | SQPPTTTNCSGGENKCYKKQ | Negative |
| C1IC47 | KTLLLTLVVVTIVCLDLGHT | Negative |
| C1IC47 | LLTLVVVTIVCLDLGHTFVC | Negative |
| C1IC47 | GHTFVCHNQQSSQPPTTTNC | Negative |
| C1IC47 | LVVVTIVCLDLGHTFVCHNQ | Negative |
| C1IC47 | VCLDLGHTFVCHNQQSSQPP | Negative |
| C1IC47 | LLLTLVVVTIVCLDLGHTFV | Negative |
| C1IC47 | CHNQQSSQPPTTTNCSGGEN | Negative |
| C1IC47 | QSSQPPTTTNCSGGENKCYK | Negative |
| C1IC47 | TFVCHNQQSSQPPTTTNCSG | Negative |
| C1IC47 | VTIVCLDLGHTFVCHNQQSS | Negative |
| C1IC47 | HTFVCHNQQSSQPPTTTNCS | Negative |
| C1IC47 | SSQPPTTTNCSGGENKCYKK | Negative |
| C1IC47 | TIVCLDLGHTFVCHNQQSSQ | Negative |
| C1IC47 | QQSSQPPTTTNCSGGENKCY | Negative |
| C1IC47 | MKTLLLTLVVVTIVCLDLGH | Negative |
| C1IC47 | VCHNQQSSQPPTTTNCSGGE | Negative |
| C1IC48 | GHTLLCHNQQSSTSPTTTC  | Negative |
| C1IC48 | IVCLDLGHTLLCHNQQSSTS | Negative |
| C1IC48 | LGHTLLCHNQQSSTSPTTTC | Negative |
| C1IC48 | LCHNQQSSTSPTTTCSSGGE | Negative |
| C1IC48 | CHNQQSSTSPTTTCSSGGES | Negative |
| C1IC48 | LLCHNQQSSTSPTTTCSSGG | Negative |
| C1IC48 | TLLLTLVVVTIVCLDLGHTL | Negative |
| C1IC48 | KTLLLTLVVVTIVCLDLGHT | Negative |
| C1IC48 | HNQQSSTSPTTTCSSGGESK | Negative |
| C1IC48 | VTIVCLDLGHTLLCHNQQSS | Negative |
| C1IC48 | VCLDLGHTLLCHNQQSSTSP | Negative |
| C1IC48 | LLLTLVVVTIVCLDLGHTLL | Negative |

|        |                       |          |
|--------|-----------------------|----------|
| C1IC48 | DLGHTLLCHNQSSSTSPTTT  | Negative |
| C1IC48 | STSPTTTCCSGGESKCYKKR  | Negative |
| C1IC48 | TIVCLDLGHTLLCHNQSSST  | Negative |
| C1IC48 | LLTLVVVTIVCLDLGHTLLC  | Negative |
| C1IC48 | SSTSPTTTCCSGGESKCYKK  | Negative |
| C1IC48 | QSSSTSPTTTCCSGGESKCY  | Negative |
| C1IC48 | HTLLCHNQSSSTSPTTTCCS  | Negative |
| C1IC48 | LVVVTVIVCLDLGHTLLCHNQ | Negative |
| C1IC48 | MKTLLLTIVVVTVIVCLDLGH | Negative |
| C1IC48 | VVVTVIVCLDLGHTLLCHNQ  | Negative |
| C1IC48 | VVTIVCLDLGHTLLCHNQ    | Negative |
| C1IC48 | CLDLGHTLLCHNQSSSTSPT  | Negative |
| C1IC48 | QSSTSPTTTCCSGGESKCYK  | Negative |
| C1IC48 | TLLCHNQSSSTSPTTTCCSG  | Negative |
| C1IC48 | LTLVVVTIVCLDLGHTLLCH  | Negative |
| C1IC48 | LDLGHTLLCHNQSSSTSPTT  | Negative |
| C1IC48 | NQSSSTSPTTTCCSGGESKC  | Negative |
| C1IC49 | CLDLGYTLTCLICPKKYCNQ  | Negative |
| C1IC49 | YTLTCLICPKKYCNQVHTCR  | Negative |
| C1IC49 | MKTLLLTIVVLVTIVCLDLGY | Negative |
| C1IC49 | LTCLICPKKYCNQVHTCRNG  | Negative |
| C1IC49 | LICPKKYCNQVHTCRNGENL  | Negative |
| C1IC49 | LLTLVLVTIVCLDLGYTLT   | Negative |
| C1IC49 | ICPKKYCNQVHTCRNGENLC  | Negative |
| C1IC49 | KTLLLTIVVLVTIVCLDLGYT | Negative |
| C1IC49 | KYCNQVHTCRNGENLCIKTF  | Negative |
| C1IC49 | CPKKYCNQVHTCRNGENLCI  | Negative |
| C1IC49 | CLICPKKYCNQVHTCRNGEN  | Negative |
| C1IC49 | LVLVTIVCLDLGYTLTCLIC  | Negative |
| C1IC49 | VLVTIVCLDLGYTLTCLICP  | Negative |
| C1IC49 | TLTCLICPKKYCNQVHTCRN  | Negative |
| C1IC49 | DLGYTLTCLICPKKYCNQVH  | Negative |
| C1IC49 | TLLLTIVVLVTIVCLDLGYTL | Negative |
| C1IC49 | VTIVCLDLGYTLTCLICPKK  | Negative |
| C1IC49 | GYTLTCLICPKKYCNQVHTC  | Negative |
| C1IC49 | LTLVLVTIVCLDLGYTLTCL  | Negative |
| C1IC49 | LGYTLTCLICPKKYCNQVHT  | Negative |
| C1IC49 | LVTIVCLDLGYTLTCLICPK  | Negative |
| C1IC49 | TCLICPKKYCNQVHTCRNGE  | Negative |
| C1IC49 | LLTLVLVTIVCLDLGYTLTC  | Negative |
| C1IC49 | IVCLDLGYTLTCLICPKKYC  | Negative |
| C1IC49 | VCLDLGYTLTCLICPKKYCN  | Negative |
| C1IC49 | TIVCLDLGYTLTCLICPKKY  | Negative |
| C1IC49 | KKYCNQVHTCRNGENLCIKT  | Negative |
| C1IC49 | PKKYCNQVHTCRNGENLCIK  | Negative |
| C1IC49 | LDLGYTLTCLICPKKYCNQV  | Negative |



|        |                       |          |
|--------|-----------------------|----------|
| C1IC50 | LLGLLTLWAELTPVSGRPG   | Negative |
| C1IC50 | LLLLGLLTLWAELTPVSGRP  | Negative |
| C1IC50 | LTPVSGRPGLCELPAETGPC  | Negative |
| C1IC50 | GGLLLLLGLLTLWAELTPVS  | Negative |
| C1IC50 | AELTPVSGRPGLCELPAETG  | Negative |
| C1IC50 | GLLLLLGLLTLWAELTPVSG  | Negative |
| C1IC50 | GLCELPAETGPCKARIRAFY  | Negative |
| C1IC50 | VSGRPGLCELPAETGPCCKAR | Negative |
| C1IC50 | LCELPAETGPCCKARIRAFYY | Negative |
| C1IC50 | CELPAETGPCCKARIRAFYYN | Negative |
| C1IC50 | LLTLWAELTPVSGRPGLCEL  | Negative |
| C1IC50 | SSGLLLLLLGLLTLWAELTP  | Negative |
| C1IC50 | ELTPVSGRPGLCELPAETGP  | Negative |
| C1IC50 | ELPAETGPCCKARIRAFYYNP | Negative |
| C1IC50 | TPVSGRPGLCELPAETGPCK  | Negative |
| C1IC50 | GRPGLCELPAETGPCCKARIR | Negative |
| C1IC50 | GLLTLWAELTPVSGRPGLCE  | Negative |
| C1IC50 | PVSGRPGLCELPAETGPCKA  | Negative |
| C1IC50 | RPGLCELPAETGPCCKARIRA | Negative |
| C1IC50 | SGGLLLLLGLLTLWAELTPV  | Negative |
| C1IC50 | LLGLLTLWAELTPVSGRPGL  | Negative |
| C1IC50 | LLLLLGLLTLWAELTPVSGR  | Negative |
| C1IC50 | PGLCELPAETGPCCKARIRAF | Negative |
| C1IC50 | SGRPGLCELPAETGPCCKARI | Negative |
| C1IC50 | WAELTPVSGRPGLCELPAET  | Negative |
| C1IC50 | LWAELTPVSGRPGLCELPAE  | Negative |
| C1IC50 | TLWAELTPVSGRPGLCELPA  | Negative |
| C1IC50 | MSSGGLLLLLGLLTLWAELT  | Negative |
| C1IC50 | LTLWAELTPVSGRPGLCELP  | Negative |
| C1IC52 | MSSGCLLLLLGLLTLWAELT  | Negative |
| C1IC52 | PVSGRPRLCELPAESGLCNA  | Negative |
| C1IC52 | LTLWAELTPVSGRPRLCELP  | Negative |
| C1IC52 | SGRPRLCELPAESGLCNAYI  | Negative |
| C1IC52 | VSGRPRLCELPAESGLCNAY  | Negative |
| C1IC52 | SSGCLLLLLGLLTLWAELTP  | Negative |
| C1IC52 | LWAELTPVSGRPRLCELPAE  | Negative |
| C1IC52 | SGCLLLLLGLLTLWAELTPV  | Negative |
| C1IC52 | LLGLLTLWAELTPVSGRPRL  | Negative |
| C1IC52 | AELTPVSGRPRLCELPAESG  | Negative |
| C1IC52 | LTPVSGRPRLCELPAESGLC  | Negative |
| C1IC52 | LLLLLGLLTLWAELTPVSGR  | Negative |
| C1IC52 | LLTLWAELTPVSGRPRLCEL  | Negative |
| C1IC52 | GCLLLLLGLLTLWAELTPVS  | Negative |
| C1IC52 | GLLTLWAELTPVSGRPRLCE  | Negative |
| C1IC52 | LCELPAESGLCNAYIPSFYY  | Negative |
| C1IC52 | RPRLCELPAESGLCNAYIPS  | Negative |

|        |                      |          |
|--------|----------------------|----------|
| C1IC52 | LLLGLLTLWAELTPVSGRP  | Negative |
| C1IC52 | RLCELPAESGLCNAYIPSFY | Negative |
| C1IC52 | CELPAESGLCNAYIPSFYYN | Negative |
| C1IC52 | CLLLLLGLLTLWAELTPVSG | Negative |
| C1IC52 | ELTPVSGRPRLCELPAESGL | Negative |
| C1IC52 | WAELTPVSGRPRLCELPAES | Negative |
| C1IC52 | LLLGLLTLWAELTPVSGRPR | Negative |
| C1IC52 | ELPAESGLCNAYIPSFYYP  | Negative |
| C1IC52 | TPVSGRPRLCELPAESGLCN | Negative |
| C1IC52 | GRPRLCELPAESGLCNAYIP | Negative |
| C1IC52 | TLWAELTPVSGRPRLCELPA | Negative |
| C1IC52 | PRLCELPAESGLCNAYIPSF | Negative |
| C1IC53 | LLLGLLTLWAELTPISGLGG | Negative |
| C1IC53 | ISGLGGPKYCHLPADPGPCS | Negative |
| C1IC53 | LLTLWAELTPISGLGGPKYC | Negative |
| C1IC53 | PISGLGGPKYCHLPADPGPC | Negative |
| C1IC53 | SSGCLLLLGLLTLWAELTP  | Negative |
| C1IC53 | ELTPISGLGGPKYCHLPADP | Negative |
| C1IC53 | CLLLLLGLLTLWAELTPISG | Negative |
| C1IC53 | GCLLLLGLLTLWAELTPIS  | Negative |
| C1IC53 | LTPISGLGGPKYCHLPADPG | Negative |
| C1IC53 | LWAELTPISGLGGPKYCHLP | Negative |
| C1IC53 | LLLLLGLLTLWAELTPISGL | Negative |
| C1IC53 | GPKYCHLPADPGPCSNYRPA | Negative |
| C1IC53 | PKYCHLPADPGPCSNYRPAY | Negative |
| C1IC53 | LLGLLTLWAELTPISGLGGP | Negative |
| C1IC53 | WAELTPISGLGGPKYCHLPA | Negative |
| C1IC53 | KYCHLPADPGPCSNYRPAYY | Negative |
| C1IC53 | YCHLPADPGPCSNYRPAYYY | Negative |
| C1IC53 | SGCLLLLGLLTLWAELTPI  | Negative |
| C1IC53 | LLLGLLTLWAELTPISGLG  | Negative |
| C1IC53 | SGLGGPKYCHLPADPGPCSN | Negative |
| C1IC53 | LTLWAELTPISGLGGPKYCH | Negative |
| C1IC53 | MSSGCLLLLGLLTLWAELT  | Negative |
| C1IC53 | LGGPKYCHLPADPGPCSNYR | Negative |
| C1IC53 | TPISGLGGPKYCHLPADPGP | Negative |
| C1IC53 | GGPKYCHLPADPGPCSNYRP | Negative |
| C1IC53 | AELTPISGLGGPKYCHLPAD | Negative |
| C1IC53 | GLLTLWAELTPISGLGGPKY | Negative |
| C1IC53 | GLGGPKYCHLPADPGPCSNY | Negative |
| C1IC53 | TLWAELTPISGLGGPKYCHL | Negative |
| C4NZN9 | ALAHAESFLKSKTGYQGVQT | Negative |
| C4NZN9 | AALAHAESFLKSKTGYQGVQ | Negative |
| C4NZN9 | VQTLPGFIGGSQPHLGGGIG | Negative |
| C4NZN9 | LAALAHAESFLKSKTGYQGV | Negative |
| C4NZN9 | KTGYQGVQTLPGFIGGSQPH | Negative |

|        |                       |          |
|--------|-----------------------|----------|
| C4NZN9 | HAESFLKSKTGYQGVQTLPG  | Negative |
| C4NZN9 | SFLKSKTGYQGVQTLPGFIG  | Negative |
| C4NZN9 | LILVSLAALAHAAESFLKSKT | Negative |
| C4NZN9 | VSLAALAHAAESFLKSKTGYQ | Negative |
| C4NZN9 | TGYQGVQTLPGFIGGSQPHL  | Negative |
| C4NZN9 | LLILVSLAALAHAAESFLKSK | Negative |
| C4NZN9 | LVSLAALAHAAESFLKSKTGY | Negative |
| C4NZN9 | AHAESFLKSKTGYQGVQTLPG | Negative |
| C4NZN9 | LKSKTGYQGVQTLPGFIGGS  | Negative |
| C4NZN9 | KSKTGYQGVQTLPGFIGGSQ  | Negative |
| C4NZN9 | SLAALAHAAESFLKSKTGYQG | Negative |
| C4NZN9 | MRVLLILVSLAALAHAAESFL | Negative |
| C4NZN9 | SKTGYQGVQTLPGFIGGSQP  | Negative |
| C4NZN9 | FLKSKTGYQGVQTLPGFIGG  | Negative |
| C4NZN9 | GVQTLPGFIGGSQPHLGGGI  | Negative |
| C4NZN9 | QGVQTLPGFIGGSQPHLGGG  | Negative |
| C4NZN9 | GYQGVQTLPGFIGGSQPHLG  | Negative |
| C4NZN9 | ESFLKSKTGYQGVQTLPGFI  | Negative |
| C4NZN9 | ILVSLAALAHAAESFLKSKTG | Negative |
| C4NZN9 | QTLPGFIGGSQPHLGGGIGG  | Negative |
| C4NZN9 | AESFLKSKTGYQGVQTLPGF  | Negative |
| C4NZN9 | VLLILVSLAALAHAAESFLKS | Negative |
| C4NZN9 | YQGVQTLPGFIGGSQPHLGG  | Negative |
| C4NZN9 | LAHAESFLKSKTGYQGVQTL  | Negative |
| C5J887 | TQFAILMIAVVLMQMLVQTE  | Negative |
| C5J887 | KIWEGVKSILIGKRGLKKLDQ | Negative |
| C5J887 | MKTQFAILMIAVVLMQMLVQ  | Negative |
| C5J887 | LVQTEGGILGKIWEGVKSIL  | Negative |
| C5J887 | ILMIAVVLMQMLVQTEGGIL  | Negative |
| C5J887 | AILMIAVVLMQMLVQTEGGI  | Negative |
| C5J887 | QMLVQTEGGILGKIWEGVKS  | Negative |
| C5J887 | MLVQTEGGILGKIWEGVKSIL | Negative |
| C5J887 | LGKIWEGVKSILIGKRGLKKL | Negative |
| C5J887 | VLMQMLVQTEGGILGKIWEG  | Negative |
| C5J887 | ILGKIWEGVKSILIGKRGLKK | Negative |
| C5J887 | LMIAVVLMQMLVQTEGGILG  | Negative |
| C5J887 | TEGGILGKIWEGVKSILIGKR | Negative |
| C5J887 | MQMLVQTEGGILGKIWEGVK  | Negative |
| C5J887 | QTEGGILGKIWEGVKSILIGK | Negative |
| C5J887 | AVVLMQMLVQTEGGILGKIW  | Negative |
| C5J887 | LMQMLVQTEGGILGKIWEGV  | Negative |
| C5J887 | KTQFAILMIAVVLMQMLVQT  | Negative |
| C5J887 | IAVVLMQMLVQTEGGILGKI  | Negative |
| C5J887 | GGILGKIWEGVKSILIGKRGL | Negative |
| C5J887 | FAILMIAVVLMQMLVQTEGG  | Negative |
| C5J887 | VVLMQMLVQTEGGILGKIWE  | Negative |

|        |                       |          |
|--------|-----------------------|----------|
| C5J887 | WEGVKSILIGKRGLKKLDQLD | Negative |
| C5J887 | GKIWEGVKSILIGKRGLKKLD | Negative |
| C5J887 | QFALMIAVVLMQMLVQTEG   | Negative |
| C5J887 | EGGILGKIWEGVKSILIGKRG | Negative |
| C5J887 | IWEGVKSILIGKRGLKKLDQL | Negative |
| C5J887 | VQTEGGILGKIWEGVKSILIG | Negative |
| C5J887 | GILGKIWEGVKSILIGKRGLK | Negative |
| C5P3X6 | VSVPLALAFGSLAAAAPNA   | Negative |
| C5P3X6 | LALAFGSLAAAAPNAGRRTC  | Negative |
| C5P3X6 | RRTC GSVPPPEFFEASEKVA | Negative |
| C5P3X6 | RTC GSVPPPEFFEASEKVAA | Negative |
| C5P3X6 | AGRRTC GSVPPPEFFEASEK | Negative |
| C5P3X6 | NAGRRTC GSVPPPEFFEASE | Negative |
| C5P3X6 | PNAGRRTC GSVPPPEFFEAS | Negative |
| C5P3X6 | SVPPPEFFEASEKVAALEES  | Negative |
| C5P3X6 | APNAGRRTC GSVPPPEFFEA | Negative |
| C5P3X6 | LAAAAPNAGRRTC GSVPPPE | Negative |
| C5P3X6 | GSLAAAAPNAGRRTC GSVPP | Negative |
| C5P3X6 | VPPPEFFEASEKVAALEESG  | Negative |
| C5P3X6 | PVLALAFGSLAAAAPNAGR   | Negative |
| C5P3X6 | MRVSVPLALAFGSLAAAAP   | Negative |
| C5P3X6 | LAFGSLAAAAPNAGRRTC G  | Negative |
| C5P3X6 | SLAAAAPNAGRRTC GSVPPP | Negative |
| C5P3X6 | GSVPPPEFFEASEKVAALEE  | Negative |
| C5P3X6 | GRRTC GSVPPPEFFEASEKV | Negative |
| C5P3X6 | AAPNAGRRTC GSVPPPEFFE | Negative |
| C5P3X6 | CGSVPPPEFFEASEKVAALE  | Negative |
| C5P3X6 | AAAAPNAGRRTC GSVPPPEF | Negative |
| C5P3X6 | VPVLALAFGSLAAAAPNAGR  | Negative |
| C5P3X6 | TCGSVPPPEFFEASEKVAAL  | Negative |
| C5P3X6 | AFGSLAAAAPNAGRRTC GSV | Negative |
| C5P3X6 | AAAPNAGRRTC GSVPPPEFF | Negative |
| C5P3X6 | VLALAFGSLAAAAPNAGRRT  | Negative |
| C5P3X6 | RVSVPLALAFGSLAAAAPN   | Negative |
| C5P3X6 | ALAFGSLAAAAPNAGRRTC G | Negative |
| C5P3X6 | FGSLAAAAPNAGRRTC GSV  | Negative |
| C6JUN9 | CPIDWLSRNLGCYKLFDDTK  | Negative |
| C6JUN9 | SGAECYTCPIDWLSRNLGCY  | Negative |
| C6JUN9 | LMPIFLSLGAECYTCPIDW   | Negative |
| C6JUN9 | DWLSRNLGCYKLFDDTKTWP  | Negative |
| C6JUN9 | MGHFTFISLCLMPIFLSLSG  | Negative |
| C6JUN9 | PIFLSLSGAECYTCPIDWLS  | Negative |
| C6JUN9 | FLSLSGAECYTCPIDWLSRN  | Negative |
| C6JUN9 | TFISLCLMPIFLSLSGAECY  | Negative |
| C6JUN9 | WLSRNLGCYKLFDDTKTWP   | Negative |
| C6JUN9 | TCPIDWLSRNLGCYKLFDDT  | Negative |

|        |                       |          |
|--------|-----------------------|----------|
| C6JUN9 | ISLCLMPIFLSLSGAECYTC  | Negative |
| C6JUN9 | GHFTFISLCLMPIFLSLSGA  | Negative |
| C6JUN9 | YTCPIDWLSRNGLCYKLFDD  | Negative |
| C6JUN9 | IDWLSRNGLCYKLFDDTKTW  | Negative |
| C6JUN9 | SLSGAECYTCPIDWLSRNGL  | Negative |
| C6JUN9 | FTFISLCLMPIFLSLSGAEC  | Negative |
| C6JUN9 | LSGAECYTCPIDWLSRNGLC  | Negative |
| C6JUN9 | HFTFISLCLMPIFLSLSGAE  | Negative |
| C6JUN9 | AECYTCPIDWLSRNGLCYKL  | Negative |
| C6JUN9 | CYTCPIDWLSRNGLCYKLFD  | Negative |
| C6JUN9 | LSLSGAECYTCPIDWLSRNG  | Negative |
| C6JUN9 | PIDWLSRNGLCYKLFDDTKT  | Negative |
| C6JUN9 | MPIFLSLSGAECYTCPIDWL  | Negative |
| C6JUN9 | SLCLMPIFLSLSGAECYTCP  | Negative |
| C6JUN9 | ECYTCPIDWLSRNGLCYKLF  | Negative |
| C6JUN9 | CLMPIFLSLSGAECYTCPID  | Negative |
| C6JUN9 | GAECYTCPIDWLSRNGLCYK  | Negative |
| C6JUN9 | IFLSLSGAECYTCPIDWLSR  | Negative |
| C6JUN9 | FISLCLMPIFLSLSGAECYT  | Negative |
| C6JUP1 | YNTMMQKVTCPEGKDKCEKY  | Negative |
| C6JUP1 | TIVCLDLGNSLICYNMTMMQK | Negative |
| C6JUP1 | LVVVTIVCLDLGNSLICYN   | Negative |
| C6JUP1 | TMMQKVTCPEGKDKCEKYAV  | Negative |
| C6JUP1 | SLICYNTMMQKVTCPEGKDK  | Negative |
| C6JUP1 | VVVTIVCLDLGNSLICYNM   | Negative |
| C6JUP1 | ICYNTMMQKVTCPEGKDKCE  | Negative |
| C6JUP1 | TLLLTLVVVTIVCLDLGNSL  | Negative |
| C6JUP1 | DLGNSLICYNMTMMQKVTCPE | Negative |
| C6JUP1 | LGNSLICYNMTMMQKVTCPEG | Negative |
| C6JUP1 | GNSLICYNMTMMQKVTCPEGK | Negative |
| C6JUP1 | LLLTLVVVTIVCLDLGNSLI  | Negative |
| C6JUP1 | LTLVVVTIVCLDLGNSLIC   | Negative |
| C6JUP1 | NSLICYNMTMMQKVTCPEGKD | Negative |
| C6JUP1 | CLDLGNSLICYNMTMMQKVTC | Negative |
| C6JUP1 | VVTIVCLDLGNSLICYNMTM  | Negative |
| C6JUP1 | MMQKVTCPEGKDKCEKYAVP  | Negative |
| C6JUP1 | QKVTCPEGKDKCEKYAVPVM  | Negative |
| C6JUP1 | KTLLLTLVVVTIVCLDLGNS  | Negative |
| C6JUP1 | MKTLLLTLVVVTIVCLDLGN  | Negative |
| C6JUP1 | VCLDLGNSLICYNMTMMQKVT | Negative |
| C6JUP1 | MQKVTCPEGKDKCEKYAVPV  | Negative |
| C6JUP1 | LLTLVVVTIVCLDLGNSLIC  | Negative |
| C6JUP1 | LICYNTMMQKVTCPEGKDKC  | Negative |
| C6JUP1 | VTIVCLDLGNSLICYNMTMMQ | Negative |
| C6JUP1 | LDLGNSLICYNMTMMQKVTCP | Negative |
| C6JUP1 | CYNTMMQKVTCPEGKDKCEK  | Negative |

|        |                       |          |
|--------|-----------------------|----------|
| C6JUP1 | NTMMQKVTCPEGKDKCEKYA  | Negative |
| C6JUP1 | IVCLDLGNSLICYNMTMMQKV | Negative |
| C6JUP2 | VVTIVCLDLGNTANTLFCDN  | Negative |
| C6JUP2 | LGNTANTLFCDNSNVPSIRT  | Negative |
| C6JUP2 | CLDLGNTANTLFCDNSNVPS  | Negative |
| C6JUP2 | NSNVPSIRTRKRCLKNQKLC  | Negative |
| C6JUP2 | TLFCDNSNVPSIRTRKRCLK  | Negative |
| C6JUP2 | GNTANTLFCDNSNVPSIRTR  | Negative |
| C6JUP2 | TLLLTLVVVTIVCLDLGNTA  | Negative |
| C6JUP2 | VCLDLGNTANTLFCDNSNVP  | Negative |
| C6JUP2 | IVCLDLGNTANTLFCDNSNV  | Negative |
| C6JUP2 | DNSNVPSIRTRKRCLKNQKL  | Negative |
| C6JUP2 | DLGNTANTLFCDNSNVPSIR  | Negative |
| C6JUP2 | NTANTLFCDNSNVPSIRTRK  | Negative |
| C6JUP2 | MKTLLLTLVVVTIVCLDLGN  | Negative |
| C6JUP2 | ANTLFCDNSNVPSIRTRKRC  | Negative |
| C6JUP2 | LVVVTIVCLDLGNTANTLFC  | Negative |
| C6JUP2 | VTIVCLDLGNTANTLFCDNS  | Negative |
| C6JUP2 | SNVPSIRTRKRCLKNQKLCY  | Negative |
| C6JUP2 | TIVCLDLGNTANTLFCDNSN  | Negative |
| C6JUP2 | LTLVVVTIVCLDLGNTANTL  | Negative |
| C6JUP2 | LFCDNSNVPSIRTRKRCLKN  | Negative |
| C6JUP2 | VVVTIVCLDLGNTANTLFC   | Negative |
| C6JUP2 | NTLFCDNSNVPSIRTRKRCL  | Negative |
| C6JUP2 | LLLTLVVVTIVCLDLGNTAN  | Negative |
| C6JUP2 | FCDNSNVPSIRTRKRCLKNQ  | Negative |
| C6JUP2 | LDLGNTANTLFCDNSNVPSI  | Negative |
| C6JUP2 | LLTLVVVTIVCLDLGNTANT  | Negative |
| C6JUP2 | TANTLFCDNSNVPSIRTRKR  | Negative |
| C6JUP2 | KTLLLTLVVVTIVCLDLGNT  | Negative |
| C6JUP2 | CDNSNVPSIRTRKRCLKNQK  | Negative |
| C6JUP3 | LEPPGTLETCPDDFTCVKKW  | Negative |
| C6JUP3 | LVCYTNVLEPPGTLETCPDD  | Negative |
| C6JUP3 | CYTNVLEPPGTLETCPDDFT  | Negative |
| C6JUP3 | TIMCLDLGYTLVCYTNVLEP  | Negative |
| C6JUP3 | EPPGTLETCPDDFTCVKKWE  | Negative |
| C6JUP3 | LTLVVVTIMCLDLGYTLVCY  | Negative |
| C6JUP3 | LGYTLCYTNVLEPPGTLET   | Negative |
| C6JUP3 | LDLGYTLVCYTNVLEPPGTL  | Negative |
| C6JUP3 | TLVCYTNVLEPPGTLETCPD  | Negative |
| C6JUP3 | DLGYTLVCYTNVLEPPGTLE  | Negative |
| C6JUP3 | MKTLLLTLVVVTIMCLDLGY  | Negative |
| C6JUP3 | TLLLTLVVVTIMCLDLGYTL  | Negative |
| C6JUP3 | MCLDLGYTLVCYTNVLEPPG  | Negative |
| C6JUP3 | VCYTNVLEPPGTLETCPDDF  | Negative |
| C6JUP3 | GYTLVCYTNVLEPPGTLET   | Negative |

|        |                       |          |
|--------|-----------------------|----------|
| C6JUP3 | LVVVTIMCLDLGYTLVCYTN  | Negative |
| C6JUP3 | CLDLGYTLVCYTNVLEPPGT  | Negative |
| C6JUP3 | YTNVLEPPGTLETCPDDFTC  | Negative |
| C6JUP3 | VLEPPGTLETCPDDFTCVKK  | Negative |
| C6JUP3 | YTLVCYTNVLEPPGTLETCP  | Negative |
| C6JUP3 | VVTIMCLDLGYTLVCYTNVL  | Negative |
| C6JUP3 | NVLEPPGTLETCPDDFTCVK  | Negative |
| C6JUP3 | TNVLEPPGTLETCPDDFTCV  | Negative |
| C6JUP3 | KTLLTLVVVTIMCLDLGYT   | Negative |
| C6JUP3 | VTIMCLDLGYTLVCYTNVLE  | Negative |
| C6JUP3 | VVVTIMCLDLGYTLVCYTNV  | Negative |
| C6JUP3 | IMCLDLGYTLVCYTNVLEPP  | Negative |
| C6JUP3 | LLTLVVVTIMCLDLGYTLV   | Negative |
| C6JUP3 | LLTLVVVTIMCLDLGYTLVC  | Negative |
| C6XZB6 | TKADVWVKDVDGVSMPPIPK  | Negative |
| C6XZB6 | GYSQTKADVWVKDVDGVSMP  | Negative |
| C6XZB6 | YSQTKADVWVKDVDGVSMP   | Negative |
| C6XZB6 | YLYVIFVVVELMVFTTKGYS  | Negative |
| C6XZB6 | LYVIFVVVELMVFTTKGYSQ  | Negative |
| C6XZB6 | VELMVFTTKGYSQTKADVW   | Negative |
| C6XZB6 | KADVWVKDVDGVSMPPIPKT  | Negative |
| C6XZB6 | QTKADVWVKDVDGVSMPPIP  | Negative |
| C6XZB6 | LYLYVIFVVVELMVFTTKGY  | Negative |
| C6XZB6 | TKGYSQTKADVWVKDVDGVS  | Negative |
| C6XZB6 | VVVELMVFTTKGYSQTKADV  | Negative |
| C6XZB6 | KRQLYLYVIFVVVELMVFTT  | Negative |
| C6XZB6 | LMVFTTKGYSQTKADVWVKD  | Negative |
| C6XZB6 | TTKGYSQTKADVWVKDVDGV  | Negative |
| C6XZB6 | FTTKGYSQTKADVWVKDVDG  | Negative |
| C6XZB6 | DVVWVKDVDGVSMPPIPKTHP | Negative |
| C6XZB6 | VIFVVVELMVFTTKGYSQTK  | Negative |
| C6XZB6 | VVELMVFTTKGYSQTKADV   | Negative |
| C6XZB6 | RQLYLYVIFVVVELMVFTTK  | Negative |
| C6XZB6 | MKRQLYLYVIFVVVELMVFT  | Negative |
| C6XZB6 | KGYSQTKADVWVKDVDGVSM  | Negative |
| C6XZB6 | SQTKADVWVKDVDGVSMPIP  | Negative |
| C6XZB6 | YVIFVVVELMVFTTKGYSQT  | Negative |
| C6XZB6 | ELMVFTTKGYSQTKADVWVK  | Negative |
| C6XZB6 | ADVWVKDVDGVSMPPIPKTH  | Negative |
| C6XZB6 | QLYLYVIFVVVELMVFTTKG  | Negative |
| C6XZB6 | IFVVVELMVFTTKGYSQTKA  | Negative |
| C6XZB6 | VFTTKGYSQTKADVWVKDVD  | Negative |
| C6XZB6 | MVFTTKGYSQTKADVWVKDV  | Negative |
| C7G1H4 | CWYTLAMCGAGYDSGTCDYM  | Negative |
| C7G1H4 | SKIQTNGGKPAWCWYTLAMC  | Negative |
| C7G1H4 | KPAWCWYTLAMCGAGYDSGT  | Negative |

|        |                      |          |
|--------|----------------------|----------|
| C7G1H4 | KIQTNGGKPAWCWYTLAMCG | Negative |
| C7G1H4 | KTLTVDEISKIQTNGGKPAW | Negative |
| C7G1H4 | SKLVKTLTVDEISKIQTNGG | Negative |
| C7G1H4 | LVKTLTVDEISKIQTNGGKP | Negative |
| C7G1H4 | TLAMCGAGYDSGTCDYMYSH | Negative |
| C7G1H4 | GGKPAWCWYTLAMCGAGYDS | Negative |
| C7G1H4 | LTVDEISKIQTNGGKPAWCW | Negative |
| C7G1H4 | AWCWYTLAMCGAGYDSGTCD | Negative |
| C7G1H4 | ISKIQTNGGKPAWCWYTLAM | Negative |
| C7G1H4 | LAMCGAGYDSGTCDYMYSHC | Negative |
| C7G1H4 | VKTLTVDEISKIQTNGGKPA | Negative |
| C7G1H4 | MSKLVKTLTVDEISKIQTNG | Negative |
| C7G1H4 | PAWCWYTLAMCGAGYDSGTC | Negative |
| C7G1H4 | DEISKIQTNGGKPAWCWYTL | Negative |
| C7G1H4 | TVDEISKIQTNGGKPAWCWY | Negative |
| C7G1H4 | TNGGKPAWCWYTLAMCGAGY | Negative |
| C7G1H4 | VDEISKIQTNGGKPAWCWYT | Negative |
| C7G1H4 | IQTNGGKPAWCWYTLAMCGA | Negative |
| C7G1H4 | GKPAWCWYTLAMCGAGYDSG | Negative |
| C7G1H4 | NGGKPAWCWYTLAMCGAGYD | Negative |
| C7G1H4 | WYTLAMCGAGYDSGTCDYMY | Negative |
| C7G1H4 | QTNGGKPAWCWYTLAMCGAG | Negative |
| C7G1H4 | YTLAMCGAGYDSGTCDYMYS | Negative |
| C7G1H4 | EISKIQTNGGKPAWCWYTLA | Negative |
| C7G1H4 | WCWYTLAMCGAGYDSGTCDY | Negative |
| C7G1H4 | KLVKTLTVDEISKIQTNGGK | Negative |
| C7G3K3 | LIVMFLVIMVISSLVDCAKK | Negative |
| C7G3K3 | KPFVQRVKNAASKAYNKLKG | Negative |
| C7G3K3 | VQRVKNAASKAYNKLKGLAM | Negative |
| C7G3K3 | HLIVMFLVIMVISSLVDCAK | Negative |
| C7G3K3 | VKNAASKAYNKLKGLAMQSQ | Negative |
| C7G3K3 | PFVQRVKNAASKAYNKLKGL | Negative |
| C7G3K3 | QRVKNAASKAYNKLKGLAMQ | Negative |
| C7G3K3 | LVDCAKKPFVQRVKNAASKA | Negative |
| C7G3K3 | MFLVIMVISSLVDCAKKPFV | Negative |
| C7G3K3 | VDCAKKPFVQRVKNAASKAY | Negative |
| C7G3K3 | LVIMVISSLVDCAKKPFVQR | Negative |
| C7G3K3 | MAKHLIVMFLVIMVISSLVD | Negative |
| C7G3K3 | AKKPFVQRVKNAASKAYNKL | Negative |
| C7G3K3 | VIMVISSLVDCAKKPFVQRV | Negative |
| C7G3K3 | CAKKPFVQRVKNAASKAYNK | Negative |
| C7G3K3 | KKPFVQRVKNAASKAYNKLK | Negative |
| C7G3K3 | ISSLVDCAKKPFVQRVKNAA | Negative |
| C7G3K3 | MVISSLVDCAKKPFVQRVKN | Negative |
| C7G3K3 | DCAKKPFVQRVKNAASKAYN | Negative |
| C7G3K3 | VISSLVDCAKKPFVQRVKNA | Negative |



|        |                       |          |
|--------|-----------------------|----------|
| C7G3K3 | KHLIVMFLVIMVISSLVDCA  | Negative |
| C7G3K3 | SSLVDCAKKPFVQVRVKNAAS | Negative |
| C7G3K3 | SLVDCAKKPFVQVRVKNAASK | Negative |
| C7G3K3 | IVMFLVIMVISSLVDCAKKP  | Negative |
| C7G3K3 | FVQVRVKNAASKAYNKLKGLA | Negative |
| C7G3K3 | AKHLIVMFLVIMVISSLVDC  | Negative |
| C7G3K3 | RVKNAASKAYNKLKGLAMQS  | Negative |
| C7G3K3 | IMVISSLVDCAKKPFVQVRVK | Negative |
| C7G3K3 | FLVIMVISSLVDCAKKPFVQ  | Negative |
| C9K4X8 | AFHGGALGEKYCDDDFHMAV  | Negative |
| C9K4X8 | AAFHGGALGEKYCDDDFHMA  | Negative |
| C9K4X8 | RHLFQATCLVLLLLHAAFHG  | Negative |
| C9K4X8 | LHAAFHGGALGEKYCDDDFH  | Negative |
| C9K4X8 | LVLLLLHAAFHGGALGEKYC  | Negative |
| C9K4X8 | LLHAAFHGGALGEKYCDDDF  | Negative |
| C9K4X8 | HLFQATCLVLLLLHAAFHGG  | Negative |
| C9K4X8 | TSNNRHLFQATCLVLLLLHA  | Negative |
| C9K4X8 | LGEKYCDDDFHMAVFRTCAV  | Negative |
| C9K4X8 | LLLLHAAFHGGALGEKYCDD  | Negative |
| C9K4X8 | NRHLFQATCLVLLLLHAAFH  | Negative |
| C9K4X8 | MTSNRHLFQATCLVLLLLH   | Negative |
| C9K4X8 | GALGEKYCDDDFHMAVFRTC  | Negative |
| C9K4X8 | GGALGEKYCDDDFHMAVFRT  | Negative |
| C9K4X8 | CLVLLLLHAAFHGGALGEKY  | Negative |
| C9K4X8 | HGGALGEKYCDDDFHMAVFR  | Negative |
| C9K4X8 | FQATCLVLLLLHAAFHGGAL  | Negative |
| C9K4X8 | TCLVLLLLHAAFHGGALGEK  | Negative |
| C9K4X8 | ALGEKYCDDDFHMAVFRTCA  | Negative |
| C9K4X8 | ATCLVLLLLHAAFHGGALGE  | Negative |
| C9K4X8 | LLLHAAFHGGALGEKYCDDD  | Negative |
| C9K4X8 | HAAFHGGALGEKYCDDDFHM  | Negative |
| C9K4X8 | FHGGALGEKYCDDDFHMAVF  | Negative |
| C9K4X8 | QATCLVLLLLHAAFHGGALG  | Negative |
| C9K4X8 | NNRHLFQATCLVLLLLHAAF  | Negative |
| C9K4X8 | SNNRHLFQATCLVLLLLHAA  | Negative |
| C9K4X8 | EKYCDDDFHMAVFRTCAVSK  | Negative |
| C9K4X8 | LFQATCLVLLLLHAAFHGGGA | Negative |
| C9K4X8 | GEKYCDDDFHMAVFRTCAVS  | Negative |
| C9X4J8 | SCFFLIGMVVECKDGYLMGP  | Negative |
| C9X4J8 | FVLFLSCFFLIGMVVECKDG  | Negative |
| C9X4J8 | DGCKLDCLMRKGTFCETCS   | Negative |
| C9X4J8 | YLMGPDGCKLDCLMRKGTFC  | Negative |
| C9X4J8 | GMVVECKDGYLMGPDGCKLD  | Negative |
| C9X4J8 | LIGMVVECKDGYLMGPDGCK  | Negative |
| C9X4J8 | PDGCKLDCLMRKGTFCETC   | Negative |
| C9X4J8 | KDGYLMGPDGCKLDCLMRKG  | Negative |

|        |                      |          |
|--------|----------------------|----------|
| C9X4J8 | IGMVVECKDGYLMGPDGCKL | Negative |
| C9X4J8 | GPDGCKLDCLMRKGTFCAT  | Negative |
| C9X4J8 | LMGPDGCKLDCLMRKGTFC  | Negative |
| C9X4J8 | ECKDGYLMGPDGCKLDCLMR | Negative |
| C9X4J8 | VLFLSCFFLIGMVVECKDGY | Negative |
| C9X4J8 | FFLIGMVVECKDGYLMGPDG | Negative |
| C9X4J8 | FLIGMVVECKDGYLMGPDGC | Negative |
| C9X4J8 | CFFLIGMVVECKDGYLMGPD | Negative |
| C9X4J8 | GYLMGPDGCKLDCLMRKGT  | Negative |
| C9X4J8 | VVECKDGYLMGPDGCKLDCL | Negative |
| C9X4J8 | TRFVLFLSCFFLIGMVVECK | Negative |
| C9X4J8 | DGYLMGPDGCKLDCLMRKGT | Negative |
| C9X4J8 | MVVECKDGYLMGPDGCKLDC | Negative |
| C9X4J8 | LSCFFLIGMVVECKDGYLMG | Negative |
| C9X4J8 | RFVLFLSCFFLIGMVVECKD | Negative |
| C9X4J8 | GCKLDCLMRKGTFCATCSL  | Negative |
| C9X4J8 | CKDGYLMGPDGCKLDCLMRK | Negative |
| C9X4J8 | MTRFVLFLSCFFLIGMVVEC | Negative |
| C9X4J8 | VECKDGYLMGPDGCKLDCLM | Negative |
| C9X4J8 | MGPDGCKLDCLMRKGTFCAT | Negative |
| C9X4J8 | FLSCFFLIGMVVECKDGYLM | Negative |
| C9X4J9 | MLIDVVVESRDAYPADWRGC | Negative |
| C9X4J9 | VESRDAYPADWRGCKFSCFW | Negative |
| C9X4J9 | KGILFISCLMLIDVVVESR  | Negative |
| C9X4J9 | RGCKFSCFWGSSSWCNEECT | Negative |
| C9X4J9 | LMLIDVVVESRDAYPADWRG | Negative |
| C9X4J9 | LIDVVVESRDAYPADWRGCK | Negative |
| C9X4J9 | ESRDAYPADWRGCKFSCFWG | Negative |
| C9X4J9 | ISCLMLIDVVVESRDAYPAD | Negative |
| C9X4J9 | PADWRGCKFSCFWGSSSWCN | Negative |
| C9X4J9 | GILFISCLMLIDVVVESRD  | Negative |
| C9X4J9 | YPADWRGCKFSCFWGSSSWC | Negative |
| C9X4J9 | ADWRGCKFSCFWGSSSWCNE | Negative |
| C9X4J9 | DWRGCKFSCFWGSSSWCNEE | Negative |
| C9X4J9 | VVVESRDAYPADWRGCKFSC | Negative |
| C9X4J9 | CLMLIDVVVESRDAYPADWR | Negative |
| C9X4J9 | ILFISCLMLIDVVVESRDAY | Negative |
| C9X4J9 | IILFISCLMLIDVVVESRDA | Negative |
| C9X4J9 | GCKFSCFWGSSSWCNEECTS | Negative |
| C9X4J9 | DVVVESRDAYPADWRGCKFS | Negative |
| C9X4J9 | MKGILFISCLMLIDVVVES  | Negative |
| C9X4J9 | DAYPADWRGCKFSCFWGSSS | Negative |
| C9X4J9 | AYPADWRGCKFSCFWGSSSW | Negative |
| C9X4J9 | SCLMLIDVVVESRDAYPADW | Negative |
| C9X4J9 | FISCLMLIDVVVESRDAYPA | Negative |
| C9X4J9 | IDVVVESRDAYPADWRGCKF | Negative |

|        |                        |          |
|--------|------------------------|----------|
| C9X4J9 | RDAYPADWRGCKFSCFWGSS   | Negative |
| C9X4J9 | WRGCKFSCFWGSSSWCNEEC   | Negative |
| C9X4J9 | SRDAYPADWRGCKFSCFWGS   | Negative |
| C9X4J9 | VVESRDAYPADWRGCKFSCF   | Negative |
| C9X4K1 | GYIIEPKGCKYSCSWGSSTW   | Negative |
| C9X4K1 | ISCLMLIDVVVESKNGYIIE   | Negative |
| C9X4K1 | DVVVESKNGYIIEPKGCKYS   | Negative |
| C9X4K1 | KGCKYSCSWGSSSTWCNRECK  | Negative |
| C9X4K1 | PKGCKYSCSWGSSSTWCNREC  | Negative |
| C9X4K1 | NGYIIEPKGCKYSCSWGSSST  | Negative |
| C9X4K1 | MLIDVVVESKNGYIIEPKGCK  | Negative |
| C9X4K1 | IIEPKGCKYSCSWGSSSTWCNR | Negative |
| C9X4K1 | IIEPKGCKYSCSWGSSSTWCN  | Negative |
| C9X4K1 | SCLMLIDVVVESKNGYIIEP   | Negative |
| C9X4K1 | VVVESKNGYIIEPKGCKYSC   | Negative |
| C9X4K1 | LMLIDVVVESKNGYIIEPKG   | Negative |
| C9X4K1 | GCKYSCSWGSSSTWCNRECKF  | Negative |
| C9X4K1 | VVESKNGYIIEPKGCKYSCS   | Negative |
| C9X4K1 | KNGYIIEPKGCKYSCSWGSS   | Negative |
| C9X4K1 | LISCLMLIDVVVESKNGYII   | Negative |
| C9X4K1 | KGMIMLISCLMLIDVVVESK   | Negative |
| C9X4K1 | IDVVVESKNGYIIEPKGCKY   | Negative |
| C9X4K1 | LIDVVVESKNGYIIEPKGCK   | Negative |
| C9X4K1 | ESKNGYIIEPKGCKYSCSWG   | Negative |
| C9X4K1 | MIMLISCLMLIDVVVESKNG   | Negative |
| C9X4K1 | IMLISCLMLIDVVVESKNGY   | Negative |
| C9X4K1 | VESKNGYIIEPKGCKYSCSW   | Negative |
| C9X4K1 | GMIMLISCLMLIDVVVESKN   | Negative |
| C9X4K1 | YIIEPKGCKYSCSWGSSSTWC  | Negative |
| C9X4K1 | MKGMIMLISCLMLIDVVVES   | Negative |
| C9X4K1 | EPKGCKYSCSWGSSSTWCNRE  | Negative |
| C9X4K1 | CLMLIDVVVESKNGYIIEPK   | Negative |
| C9X4K1 | SKNGYIIEPKGCKYSCSWG    | Negative |
| C9X4K4 | SNGCKRSCFFGSTSWCNT     | Negative |
| C9X4K4 | GYLLDRSNGCKRSCFFGSTS   | Negative |
| C9X4K4 | KEGYLLDRSNGCKRSCFFGS   | Negative |
| C9X4K4 | SCLMLIEVVVGKEGYLLDR    | Negative |
| C9X4K4 | MIMLISCLMLIEVVVGKEG    | Negative |
| C9X4K4 | GMIMLISCLMLIEVVVGKE    | Negative |
| C9X4K4 | IEVVVGKEGYLLDRSNGCK    | Negative |
| C9X4K4 | VGGKEGYLLDRSNGCKRSCF   | Negative |
| C9X4K4 | DRSNGCKRSCFFGSTSWCNT   | Negative |
| C9X4K4 | VVGKEGYLLDRSNGCKRSC    | Negative |
| C9X4K4 | ISCLMLIEVVVGKEGYLLD    | Negative |
| C9X4K4 | LDRSNGCKRSCFFGSTWCN    | Negative |
| C9X4K4 | CLMLIEVVVGKEGYLLDRS    | Negative |

|        |                      |          |
|--------|----------------------|----------|
| C9X4K4 | KGMIMLISCLMLIEVVVGK  | Negative |
| C9X4K4 | LMLIEVVVGKEGYLLDRSN  | Negative |
| C9X4K4 | VVVGGKEGYLLDRSNGCKRS | Negative |
| C9X4K4 | GKEGYLLDRSNGCKRSCFFG | Negative |
| C9X4K4 | IMLISCLMLIEVVVGKEGY  | Negative |
| C9X4K4 | MLIEVVVGKEGYLLDRSNG  | Negative |
| C9X4K4 | LLDRSNGCKRSCFFGSTSWC | Negative |
| C9X4K4 | EGYLLDRSNGCKRSCFFGST | Negative |
| C9X4K4 | LIEVVVGKEGYLLDRSNGC  | Negative |
| C9X4K4 | YLLDRSNGCKRSCFFGSTSW | Negative |
| C9X4K4 | EVVVGGKEGYLLDRSNGCKR | Negative |
| C9X4K4 | GGKEGYLLDRSNGCKRSCFF | Negative |
| C9X4K4 | NGCKRSCFFGSTSWCNTECK | Negative |
| C9X4K4 | RSNGCKRSCFFGSTSWCNTE | Negative |
| C9X4K4 | LISCLMLIEVVVGKEGYLL  | Negative |
| C9X4K4 | MKGMIMLISCLMLIEVVVG  | Negative |
| C9X4K7 | GYPQSKVNYCKIYCPNTTVC | Negative |
| C9X4K7 | ELREARDGYPQSKVNYCKIY | Negative |
| C9X4K7 | GLELREARDGYPQSKVNYCK | Negative |
| C9X4K7 | LFIGLELREARDGYPQSKVN | Negative |
| C9X4K7 | ARDGYPQSKVNYCKIYCPNT | Negative |
| C9X4K7 | DGYPQSKVNYCKIYCPNTTV | Negative |
| C9X4K7 | SKVNYCKIYCPNTTVCQWTC | Negative |
| C9X4K7 | KFAIAVALLLFIGLELREAR | Negative |
| C9X4K7 | LKFAIAVALLLFIGLELREA | Negative |
| C9X4K7 | VNYCKIYCPNTTVCQWTCKN | Negative |
| C9X4K7 | IGLELREARDGYPQSKVNYC | Negative |
| C9X4K7 | AIAVALLLFIGLELREARDG | Negative |
| C9X4K7 | LLFIGLELREARDGYPQSK  | Negative |
| C9X4K7 | FAIAVALLLFIGLELREARD | Negative |
| C9X4K7 | LLFIGLELREARDGYPQSKV | Negative |
| C9X4K7 | LELREARDGYPQSKVNYCKI | Negative |
| C9X4K7 | VALLLFIGLELREARDGYPQ | Negative |
| C9X4K7 | FIGLELREARDGYPQSKVNY | Negative |
| C9X4K7 | LREARDGYPQSKVNYCKIYC | Negative |
| C9X4K7 | QSKVNYCKIYCPNTTVCQWT | Negative |
| C9X4K7 | REARDGYPQSKVNYCKIYCP | Negative |
| C9X4K7 | EARDGYPQSKVNYCKIYCPN | Negative |
| C9X4K7 | RDGYPQSKVNYCKIYCPNTT | Negative |
| C9X4K7 | YPQSKVNYCKIYCPNTTVCQ | Negative |
| C9X4K7 | MLKFAIAVALLLFIGLELRE | Negative |
| C9X4K7 | IAVALLLFIGLELREARDGY | Negative |
| C9X4K7 | KVNYCKIYCPNTTVCQWTCK | Negative |
| C9X4K7 | ALLLFIGLELREARDGYPQS | Negative |
| C9X4K7 | PQSKVNYCKIYCPNTTVCQW | Negative |
| D0UGJ0 | VLLVGVEGNLVQFETLIMKI | Negative |

|        |                      |          |
|--------|----------------------|----------|
| D0UGJ0 | LIMKIAGRSGVWYYGSYGCY | Negative |
| D0UGJ0 | NLVQFETLIMKIAGRSGVWY | Negative |
| D0UGJ0 | QFETLIMKIAGRSGVWYYGS | Negative |
| D0UGJ0 | EGNLVQFETLIMKIAGRSGV | Negative |
| D0UGJ0 | IMAVLLVGVEGNLVQFETLI | Negative |
| D0UGJ0 | LVQFETLIMKIAGRSGVWYY | Negative |
| D0UGJ0 | GNLVQFETLIMKIAGRSGVW | Negative |
| D0UGJ0 | IAGRSGVWYYGSYGCYCGSG | Negative |
| D0UGJ0 | FETLIMKIAGRSGVWYYGSY | Negative |
| D0UGJ0 | LLVGVEGNLVQFETLIMKIA | Negative |
| D0UGJ0 | AVLLVGVEGNLVQFETLIMK | Negative |
| D0UGJ0 | LWIMAVLLVGVEGNLVQFET | Negative |
| D0UGJ0 | TLIMKIAGRSGVWYYGSYGC | Negative |
| D0UGJ0 | MKIAGRSGVWYYGSYGCYCG | Negative |
| D0UGJ0 | LVGVEGNLVQFETLIMKIAG | Negative |
| D0UGJ0 | VGVEGNLVQFETLIMKIAGR | Negative |
| D0UGJ0 | ETLIMKIAGRSGVWYYGSYG | Negative |
| D0UGJ0 | VQFETLIMKIAGRSGVWYYG | Negative |
| D0UGJ0 | GVEGNLVQFETLIMKIAGRS | Negative |
| D0UGJ0 | KIAGRSGVWYYGSYGCYCGS | Negative |
| D0UGJ0 | IMKIAGRSGVWYYGSYGCYC | Negative |
| D0UGJ0 | MAVLLVGVEGNLVQFETLIM | Negative |
| D0UGJ0 | VEGNLVQFETLIMKIAGRSG | Negative |
| D0UGJ0 | MRTLWIMAVLLVGVEGNLVQ | Negative |
| D0UGJ0 | TLWIMAVLLVGVEGNLVQFE | Negative |
| D0UGJ0 | AGRSGVWYYGSYGCYCGSGG | Negative |
| D0UGJ0 | WIMAVLLVGVEGNLVQFETL | Negative |
| D0UGJ0 | GRSGVWYYGSYGCYCGSGGQ | Negative |
| D1MGU0 | MGRFIFVSFGLLVVFLSLSG | Negative |
| D1MGU0 | GRFIFVSFGLLVVFLSLSGT | Negative |
| D1MGU0 | LSGTGADCPFDWSSFRQYCY | Negative |
| D1MGU0 | RFIFVSFGLLVVFLSLSGTG | Negative |
| D1MGU0 | FVSFGLLVVFLSLSGTGADC | Negative |
| D1MGU0 | DWSSFRQYCYRVFKQLKTWE | Negative |
| D1MGU0 | WSSFRQYCYRVFKQLKTWED | Negative |
| D1MGU0 | SSFRQYCYRVFKQLKTWEDA | Negative |
| D1MGU0 | PFDWSSFRQYCYRVFKQLKT | Negative |
| D1MGU0 | LSLSGTGADCPFDWSSFRQY | Negative |
| D1MGU0 | CPFDWSSFRQYCYRVFKQLK | Negative |
| D1MGU0 | GLLVVFLSLSGTGADCPFDW | Negative |
| D1MGU0 | FLSLSGTGADCPFDWSSFRQ | Negative |
| D1MGU0 | TGADCPFDWSSFRQYCYRVF | Negative |
| D1MGU0 | FIFVSFGLLVVFLSLSGTGA | Negative |
| D1MGU0 | VVFLSLSGTGADCPFDWSSF | Negative |
| D1MGU0 | VSFGLLVVFLSLSGTGADCP | Negative |
| D1MGU0 | LLVVFLSLSGTGADCPFDWS | Negative |

|        |                      |          |
|--------|----------------------|----------|
| D1MGU0 | LVVFLSLSGTGADCPFDWSS | Negative |
| D1MGU0 | SLSGTGADCPFDWSSFRQYC | Negative |
| D1MGU0 | FDWSSFRQYCYRVFKQLKTW | Negative |
| D1MGU0 | GADCPFDWSSFRQYCYRVFK | Negative |
| D1MGU0 | DCPFDWSSFRQYCYRVFKQL | Negative |
| D1MGU0 | GTGADCPFDWSSFRQYCYRV | Negative |
| D1MGU0 | SGTGADCPFDWSSFRQYCYR | Negative |
| D1MGU0 | SFGLLVVFLSLSGTGADCPF | Negative |
| D1MGU0 | IFVSFGLLVVFLSLSGTGAD | Negative |
| D1MGU0 | ADCPFDWSSFRQYCYRVFKQ | Negative |
| D1MGU0 | VFLSLSGTGADCPFDWSSFR | Negative |
| D3JXM1 | LIICSISICTEAFGLIDVKC | Negative |
| D3JXM1 | VLIALIICSISICTEAFGLI | Negative |
| D3JXM1 | ALIICSISICTEAFGLIDVK | Negative |
| D3JXM1 | FGLIDVKCSASRECWVACKK | Negative |
| D3JXM1 | SICTEAFGLIDVKCSASREC | Negative |
| D3JXM1 | KILSIVLIALIICSISICTE | Negative |
| D3JXM1 | IALIICSISICTEAFGLIDV | Negative |
| D3JXM1 | ICTEAFGLIDVKCSASRECW | Negative |
| D3JXM1 | TEAFGLIDVKCSASRECWVA | Negative |
| D3JXM1 | SIVLIALIICSISICTEAFG | Negative |
| D3JXM1 | VKCSASRECWVACKKVTGSG | Negative |
| D3JXM1 | LSIVLIALIICSISICTEAF | Negative |
| D3JXM1 | LIDVKCSASRECWVACKKVT | Negative |
| D3JXM1 | ISICTEAFGLIDVKCSASRE | Negative |
| D3JXM1 | EAFLIDVKCSASRECWVAC  | Negative |
| D3JXM1 | CTEAFGLIDVKCSASRECWV | Negative |
| D3JXM1 | ILSIVLIALIICSISICTEA | Negative |
| D3JXM1 | IVLIALIICSISICTEAFGL | Negative |
| D3JXM1 | KCSASRECWVACKKVTGSGQ | Negative |
| D3JXM1 | ICSISICTEAFGLIDVKCSA | Negative |
| D3JXM1 | AFGLIDVKCSASRECWVACK | Negative |
| D3JXM1 | MKILSIVLIALIICSISICT | Negative |
| D3JXM1 | DVKCSASRECWVACKKVTGS | Negative |
| D3JXM1 | GLIDVKCSASRECWVACKKV | Negative |
| D3JXM1 | CSISICTEAFGLIDVKCSAS | Negative |
| D3JXM1 | SISICTEAFGLIDVKCSASR | Negative |
| D3JXM1 | CSASRECWVACKKVTGSGQG | Negative |
| D3JXM1 | IICSISICTEAFGLIDVKCS | Negative |
| D3JXM1 | IDVKCSASRECWVACKKVTG | Negative |
| D3RVD4 | AEEPPTVALTPAAALLPDG  | Negative |
| D3RVD4 | VHTASPIAAWLLAVGLVAH  | Negative |
| D3RVD4 | PIAAWLLAVGLVAHAEEP   | Negative |
| D3RVD4 | HTASPIAAWLLAVGLVAHA  | Negative |
| D3RVD4 | EEPPTVALTPAAALLPDGA  | Negative |
| D3RVD4 | AWLLAVGLVAHAEEPPTVAL | Negative |

|        |                       |          |
|--------|-----------------------|----------|
| D3RVD4 | AHAEEPPTVALTVPAAALLP  | Negative |
| D3RVD4 | HAEEPPTVALTVPAAALLPD  | Negative |
| D3RVD4 | LVAHAEEPPTVALTVPAAAL  | Negative |
| D3RVD4 | RVHTASPIAAAWLLAVGLVA  | Negative |
| D3RVD4 | AVGLVAHAEEPPTVALTVPA  | Negative |
| D3RVD4 | VAHAEEPPTVALTVPAAALL  | Negative |
| D3RVD4 | ASPIAAAWLLAVGLVAHAEE  | Negative |
| D3RVD4 | PPTVALTVPAAALLPDGALG  | Negative |
| D3RVD4 | DVRVHTASPIAAAWLLAVGL  | Negative |
| D3RVD4 | WLLAVGLVAHAEEPPTVALT  | Negative |
| D3RVD4 | VRVHTASPIAAAWLLAVGLV  | Negative |
| D3RVD4 | EPPTVALTVPAAALLPDGAL  | Negative |
| D3RVD4 | GLVAHAEEPPTVALTVPAAA  | Negative |
| D3RVD4 | AAAWLLAVGLVAHAEEPPTV  | Negative |
| D3RVD4 | MRGDVRVHTASPIAAAWLLA  | Negative |
| D3RVD4 | GDVRVHTASPIAAAWLLAVG  | Negative |
| D3RVD4 | SPIAAAWLLAVGLVAHAEEP  | Negative |
| D3RVD4 | LAVGLVAHAEEPPTVALTVP  | Negative |
| D3RVD4 | AAWLLAVGLVAHAEEPPTVA  | Negative |
| D3RVD4 | RGDVRVHTASPIAAAWLLAV  | Negative |
| D3RVD4 | TASPIAAAWLLAVGLVAHAE  | Negative |
| D3RVD4 | VGLVAHAEEPPTVALTVPAA  | Negative |
| D3RVD4 | LLAVGLVAHAEEPPTVALTVP | Negative |
| D4A540 | GPGDVSGNKLKKMLQKREGP  | Negative |
| D4A540 | PGDVSGNKLKKMLQKREGPV  | Negative |
| D4A540 | LLLLCLGPGDVSGNKLKKML  | Negative |
| D4A540 | ALAGLALLLLCLGPGDVSG   | Negative |
| D4A540 | LCLGPGDVSGNKLKKMLQKR  | Negative |
| D4A540 | TSSARPAVLALAGLALLLL   | Negative |
| D4A540 | AGLALLLLCLGPGDVSGNK   | Negative |
| D4A540 | GTSSARPAVLALAGLALLLL  | Negative |
| D4A540 | SARPAVLALAGLALLLLCL   | Negative |
| D4A540 | LALAGLALLLLCLGPGDVS   | Negative |
| D4A540 | GDVSGNKLKKMLQKREGPVP  | Negative |
| D4A540 | LGPGDVSGNKLKKMLQKREG  | Negative |
| D4A540 | PAVLALAGLALLLLCLGPG   | Negative |
| D4A540 | MGTSSARPAVLALAGLALL   | Negative |
| D4A540 | RPAVLALAGLALLLLCLGP   | Negative |
| D4A540 | LAGLALLLLCLGPGDVSGN   | Negative |
| D4A540 | GLALLLLCLGPGDVSGNKL   | Negative |
| D4A540 | LALLLLCLGPGDVSGNKLK   | Negative |
| D4A540 | LLLLCLGPGDVSGNKLKKM   | Negative |
| D4A540 | DVSGNKLKKMLQKREGPVPS  | Negative |
| D4A540 | LLLCLGPGDVSGNKLKKMLQ  | Negative |
| D4A540 | AVLALAGLALLLLCLGPGD   | Negative |
| D4A540 | VLALAGLALLLLCLGPGDV   | Negative |

|        |                      |          |
|--------|----------------------|----------|
| D4A540 | SSARPAVLALAGLALLLLLC | Negative |
| D4A540 | VSGNKLKKMLQKREGPVPSK | Negative |
| D4A540 | ARPAVLALAGLALLLLCLG  | Negative |
| D4A540 | CLGPGDVSGNKLKKMLQKRE | Negative |
| D4A540 | SGNKLKKMLQKREGPVPSKT | Negative |
| D4A540 | LLCLGPGDVSGNKLKKMLQK | Negative |
| D5QVH0 | LTLAASVAFAVTAGQAVAAG | Negative |
| D5QVH0 | AAGEKVFNKCKACHQVGETA | Negative |
| D5QVH0 | AVTAGQAVAAGDPAAGEKVF | Negative |
| D5QVH0 | PAAGEKVFNKCKACHQVGET | Negative |
| D5QVH0 | GDPAAGEKVFNKCKACHQVG | Negative |
| D5QVH0 | AVAAGDPAAGEKVFNKCKAC | Negative |
| D5QVH0 | AGQAVAAGDPAAGEKVFNKC | Negative |
| D5QVH0 | MLTLAASVAFAVTAGQAVAA | Negative |
| D5QVH0 | MKSISMLTLAASVAFAVTAG | Negative |
| D5QVH0 | SISMLTLAASVAFAVTAGQA | Negative |
| D5QVH0 | AFAVTAGQAVAAGDPAAGEK | Negative |
| D5QVH0 | ASVAFAVTAGQAVAAGDPAA | Negative |
| D5QVH0 | KSISMLTLAASVAFAVTAGQ | Negative |
| D5QVH0 | ISMLTLAASVAFAVTAGQAV | Negative |
| D5QVH0 | TAGQAVAAGDPAAGEKVFNK | Negative |
| D5QVH0 | AGEKVFNKCKACHQVGETAK | Negative |
| D5QVH0 | AAGDPAAGEKVFNKCKACHQ | Negative |
| D5QVH0 | TLAASVAFAVTAGQAVAAGD | Negative |
| D5QVH0 | AGDPAAGEKVFNKCKACHQV | Negative |
| D5QVH0 | SMLTLAASVAFAVTAGQAVA | Negative |
| D5QVH0 | DPAAGEKVFNKCKACHQVGE | Negative |
| D5QVH0 | QAVAAGDPAAGEKVFNKCKA | Negative |
| D5QVH0 | VTAGQAVAAGDPAAGEKVFN | Negative |
| D5QVH0 | VAFAVTAGQAVAAGDPAAGE | Negative |
| D5QVH0 | FAVTAGQAVAAGDPAAGEKV | Negative |
| D5QVH0 | GQAVAAGDPAAGEKVFNKCK | Negative |
| D5QVH0 | VAAGDPAAGEKVFNKCKACH | Negative |
| D5QVH0 | LAASVAFAVTAGQAVAAGDP | Negative |
| D5QVH0 | SVAFAVTAGQAVAAGDPAAG | Negative |
| D7A6E5 | FAAGCLALALLVLPFVLTGA | Negative |
| D7A6E5 | ALALLVLPFVLTGARAAEDE | Negative |
| D7A6E5 | LTGARAAEDESEKEIERYRQ | Negative |
| D7A6E5 | ALLVLPFVLTGARAAEDESE | Negative |
| D7A6E5 | AEDESEKEIERYRQMIEDPM | Negative |
| D7A6E5 | GARAAEDESEKEIERYRQMI | Negative |
| D7A6E5 | RAAEDESEKEIERYRQMIED | Negative |
| D7A6E5 | LPFVLTGARAAEDESEKEIE | Negative |
| D7A6E5 | AGCLALALLVLPFVLTGARA | Negative |
| D7A6E5 | AAEDESEKEIERYRQMIEDP | Negative |
| D7A6E5 | GCLALALLVLPFVLTGARAA | Negative |



|        |                       |          |
|--------|-----------------------|----------|
| D7A6E5 | CLALALLVLPFVLTGARAAE  | Negative |
| D7A6E5 | LLVLPFVLTGARAAEDESEK  | Negative |
| D7A6E5 | AAGCLALALLVLPFVLTGAR  | Negative |
| D7A6E5 | MRRFAAGCLALALLVLPFVL  | Negative |
| D7A6E5 | RFAAGCLALALLVLPFVLTG  | Negative |
| D7A6E5 | RRFAAGCLALALLVLPFVLT  | Negative |
| D7A6E5 | ESEKEIERYRQMIEDPMANP  | Negative |
| D7A6E5 | VLPFVLTGARAAEDESEKEI  | Negative |
| D7A6E5 | ARAAEDESEKEIERYRQMIE  | Negative |
| D7A6E5 | LALALLVLPFVLTGARAAED  | Negative |
| D7A6E5 | LVLFPFVLTGARAAEDESEKE | Negative |
| D7A6E5 | PFVLTGARAAEDESEKEIER  | Negative |
| D7A6E5 | EDESEKEIERYRQMIEDPMA  | Negative |
| D7A6E5 | DESEKEIERYRQMIEDPMAN  | Negative |
| D7A6E5 | FVLTGARAAEDESEKEIERY  | Negative |
| D7A6E5 | SEKEIERYRQMIEDPMANPG  | Negative |
| D7A6E5 | VLTGARAAEDESEKEIERYR  | Negative |
| D7A6E5 | TGARAAEDESEKEIERYRQM  | Negative |
| D7UQ40 | PSVVGHSMPHRQETQNLNMF  | Negative |
| D7UQ40 | NLNNFLESNAINPAAINGET  | Negative |
| D7UQ40 | LIILNLLSLGITPSVVGHS   | Negative |
| D7UQ40 | LNLLSLGITPSVVGHSMPHR  | Negative |
| D7UQ40 | MRLIILNLLSLGITPSVVG   | Negative |
| D7UQ40 | IILNLLSLGITPSVVGHS    | Negative |
| D7UQ40 | ILNLLSLGITPSVVGHS     | Negative |
| D7UQ40 | VVGHSMPHRQETQNLNMFLE  | Negative |
| D7UQ40 | MPHRQETQNLNMFLESNAINP | Negative |
| D7UQ40 | ETQNLNMFLESNAINPAAIN  | Negative |
| D7UQ40 | TQNLNMFLESNAINPAAING  | Negative |
| D7UQ40 | SGMPHRQETQNLNMFLESNAI | Negative |
| D7UQ40 | LLSLGITPSVVGHSMPHRQE  | Negative |
| D7UQ40 | RLIILNLLSLGITPSVVGHS  | Negative |
| D7UQ40 | RQETQNLNMFLESNAINPAA  | Negative |
| D7UQ40 | LSLGITPSVVGHSMPHRQET  | Negative |
| D7UQ40 | TPSVVGHSMPHRQETQNLNN  | Negative |
| D7UQ40 | GITPSVVGHSMPHRQETQNL  | Negative |
| D7UQ40 | VGHSMPHRQETQNLNMFLES  | Negative |
| D7UQ40 | GMPHRQETQNLNMFLESNAIN | Negative |
| D7UQ40 | SVVGHSMPHRQETQNLNNFL  | Negative |
| D7UQ40 | GHSMPHRQETQNLNMFLESN  | Negative |
| D7UQ40 | HRQETQNLNMFLESNAINPA  | Negative |
| D7UQ40 | HSGMPHRQETQNLNMFLESNA | Negative |
| D7UQ40 | ITPSVVGHSMPHRQETQNLN  | Negative |
| D7UQ40 | QETQNLNMFLESNAINPAAI  | Negative |
| D7UQ40 | QNLNMFLESNAINPAAINGE  | Negative |
| D7UQ40 | SLGITPSVVGHSMPHRQETQ  | Negative |

|        |                      |          |
|--------|----------------------|----------|
| D7UQ40 | NLLSLGITPSVVGHSOPHRQ | Negative |
| E0D877 | AGKPGIQLFVIFLLSSFAA  | Negative |
| E0D877 | AAVWAMDNMPADKDVSKLF  | Negative |
| E0D877 | LLSSFAAVWAMDNMPADKD  | Negative |
| E0D877 | IQLFVIFLLSSFAAVWAM   | Negative |
| E0D877 | WAMDNMPADKDVSKLFPLTL | Negative |
| E0D877 | DNMPADKDVSKLFPLTLIH  | Negative |
| E0D877 | LFVIFLLSSFAAVWAMDN   | Negative |
| E0D877 | GKPGIQLFVIFLLSSFAAV  | Negative |
| E0D877 | AVWAMDNMPADKDVSKLFP  | Negative |
| E0D877 | SFAAVWAMDNMPADKDVSK  | Negative |
| E0D877 | FLLSSFAAVWAMDNMPAD   | Negative |
| E0D877 | PGIQLFVIFLLSSFAAVW   | Negative |
| E0D877 | MAGKPGIQLFVIFLLSSFA  | Negative |
| E0D877 | KPGIQLFVIFLLSSFAAVV  | Negative |
| E0D877 | FAAVWAMDNMPADKDVSKL  | Negative |
| E0D877 | SSFAAVWAMDNMPADKDVS  | Negative |
| E0D877 | GIQLFVIFLLSSFAAVWA   | Negative |
| E0D877 | VWAMDNMPADKDVSKLFPLT | Negative |
| E0D877 | QLFVIFLLSSFAAVWAMD   | Negative |
| E0D877 | MPADKDVSKLFPLTLIHIND | Negative |
| E0D877 | FVIFLLSSFAAVWAMDNM   | Negative |
| E0D877 | VWAMDNMPADKDVSKLFPL  | Negative |
| E0D877 | AMDNMPADKDVSKLFPLTLI | Negative |
| E0D877 | LSSFAAVWAMDNMPADKDV  | Negative |
| E0D877 | PADKDVSKLFPLTLIHINDL | Negative |
| E0D877 | NMPADKDVSKLFPLTLIHIN | Negative |
| E0D877 | LLLSSFAAVWAMDNMPADK  | Negative |
| E0D877 | IFLLSSFAAVWAMDNMPA   | Negative |
| E0D877 | MDNMPADKDVSKLFPLTLIH | Negative |
| E1V825 | YNQDGTKLDIYGNVQIGFRN | Negative |
| E1V825 | AIAGAMAASGAQAATVYNQD | Negative |
| E1V825 | VYNQDGTKLDIYGNVQIGFR | Negative |
| E1V825 | SGAQAATVYNQDGTKLDIYG | Negative |
| E1V825 | DGTKLDIYGNVQIGFRNIEA | Negative |
| E1V825 | IAGAMAASGAQAATVYNQDG | Negative |
| E1V825 | MKKTLLATAIAGAMAASGAQ | Negative |
| E1V825 | GTKLDIYGNVQIGFRNIEAE | Negative |
| E1V825 | AATVYNQDGTKLDIYGNVQI | Negative |
| E1V825 | AQAATVYNQDGTKLDIYGNV | Negative |
| E1V825 | TVYNQDGTKLDIYGNVQIGF | Negative |
| E1V825 | QAATVYNQDGTKLDIYGNVQ | Negative |
| E1V825 | LATAIAGAMAASGAQAATVY | Negative |
| E1V825 | AMAASGAQAATVYNQDGTKL | Negative |
| E1V825 | GAMAASGAQAATVYNQDGTK | Negative |
| E1V825 | KKTLLATAIAGAMAASGAQA | Negative |

|        |                       |          |
|--------|-----------------------|----------|
| E1V825 | LLATAIAGAMAASGAQAATV  | Negative |
| E1V825 | TAIAGAMAASGAQAATVYNQ  | Negative |
| E1V825 | GAQAATVYNQDGTKLDIYGN  | Negative |
| E1V825 | QDGTKLDIYGNVQIGFRNIE  | Negative |
| E1V825 | KTLLATAIAGAMAASGAQAA  | Negative |
| E1V825 | TKLDIYGNVQIGFRNIEAEN  | Negative |
| E1V825 | AGAMAASGAQAATVYNQDGT  | Negative |
| E1V825 | NQDGTKLDIYGNVQIGFRNI  | Negative |
| E1V825 | ASGAQAATVYNQDGTKLDIY  | Negative |
| E1V825 | MAASGAQAATVYNQDGTKLD  | Negative |
| E1V825 | ATVYNQDGTKLDIYGNVQIG  | Negative |
| E1V825 | TLLATAIAGAMAASGAQAAT  | Negative |
| E1V825 | AASGAQAATVYNQDGTKLDI  | Negative |
| E1VBK1 | YKLLTTASIGALMLGMSTAA  | Negative |
| E1VBK1 | KLLTTASIGALMLGMSTAAY  | Negative |
| E1VBK1 | STAAYS DNWRYAHEEYEGDV | Negative |
| E1VBK1 | DNWRYAHEEYEGDVQDVFAQ  | Negative |
| E1VBK1 | TAAYS DNWRYAHEEYEGDVQ | Negative |
| E1VBK1 | MKAYKLLTTASIGALMLGMS  | Negative |
| E1VBK1 | TASIGALMLGMSTAAYS DNW | Negative |
| E1VBK1 | LTTASIGALMLGMSTAAYS D | Negative |
| E1VBK1 | LLTTASIGALMLGMSTAAYS  | Negative |
| E1VBK1 | AYS DNWRYAHEEYEGDVQDV | Negative |
| E1VBK1 | SDNWRYAHEEYEGDVQDVFA  | Negative |
| E1VBK1 | TTASIGALMLGMSTAAYS DN | Negative |
| E1VBK1 | IGALMLGMSTAAYS DNWRYA | Negative |
| E1VBK1 | NWRYAHEEYEGDVQDVFAQA  | Negative |
| E1VBK1 | MSTAAYS DNWRYAHEEYEGD | Negative |
| E1VBK1 | AAYS DNWRYAHEEYEGDVQD | Negative |
| E1VBK1 | RYAHEEYEGDVQDVFAQAFK  | Negative |
| E1VBK1 | ALMLGMSTAAYS DNWRYAHE | Negative |
| E1VBK1 | ASIGALMLGMSTAAYS DNWR | Negative |
| E1VBK1 | GMSTAAYS DNWRYAHEEYEG | Negative |
| E1VBK1 | GALMLGMSTAAYS DNWRYAH | Negative |
| E1VBK1 | YAHEEYEGDVQDVFAQAFKG  | Negative |
| E1VBK1 | WRYAHEEYEGDVQDVFAQAF  | Negative |
| E1VBK1 | MLGMSTAAYS DNWRYAHEEY | Negative |
| E1VBK1 | LGMSTAAYS DNWRYAHEEYE | Negative |
| E1VBK1 | AYKLLTTASIGALMLGMSTA  | Negative |
| E1VBK1 | LMLGMSTAAYS DNWRYAHEE | Negative |
| E1VBK1 | KAYKLLTTASIGALMLGMST  | Negative |
| E1VBK1 | YS DNWRYAHEEYEGDVQDVF | Negative |
| E1XUJ2 | LLAGFGPPPRAAELPPGRLA  | Negative |
| E1XUJ2 | PPGRLATTEDYFAQQAKQAV  | Negative |
| E1XUJ2 | PRAAELPPGRLATTEDYFAQ  | Negative |
| E1XUJ2 | AALLAGFGPPPRAAELPPGR  | Negative |

|        |                      |          |
|--------|----------------------|----------|
| E1XUJ2 | PPRAAELPPGRLATTEDYFA | Negative |
| E1XUJ2 | AAALLAGFGPPPRAAELPPG | Negative |
| E1XUJ2 | ALLAGFGPPPRAAELPPGRL | Negative |
| E1XUJ2 | LPPGRLATTEDYFAQQAKQA | Negative |
| E1XUJ2 | IVSAAALLAGFGPPPRAAEL | Negative |
| E1XUJ2 | TLKTTAIVSAAALLAGFGPP | Negative |
| E1XUJ2 | LAGFGPPPRAAELPPGRLAT | Negative |
| E1XUJ2 | MRFTLKTTAIVSAAALLAGF | Negative |
| E1XUJ2 | PPPRAAELPPGRLATTEDYF | Negative |
| E1XUJ2 | AGFGPPPRAAELPPGRLATT | Negative |
| E1XUJ2 | LKTTAIVSAAALLAGFGPPP | Negative |
| E1XUJ2 | KTTAIVSAAALLAGFGPPPR | Negative |
| E1XUJ2 | FGPPPRAAELPPGRLATTED | Negative |
| E1XUJ2 | GFGPPPRAAELPPGRLATTE | Negative |
| E1XUJ2 | VSAAALLAGFGPPPRAAELP | Negative |
| E1XUJ2 | TAIVSAAALLAGFGPPPRAA | Negative |
| E1XUJ2 | AAELPPGRLATTEDYFAQQA | Negative |
| E1XUJ2 | RFTLKTTAIVSAAALLAGFG | Negative |
| E1XUJ2 | GPPPRAAELPPGRLATTEDY | Negative |
| E1XUJ2 | TTAIVSAAALLAGFGPPRA  | Negative |
| E1XUJ2 | AELPPGRLATTEDYFAQQAK | Negative |
| E1XUJ2 | ELPPGRLATTEDYFAQQAKQ | Negative |
| E1XUJ2 | FTLKTTAIVSAAALLAGFGP | Negative |
| E1XUJ2 | RAAELPPGRLATTEDYFAQQ | Negative |
| E1XUJ2 | AIVSAAALLAGFGPPPRAAE | Negative |
| E2DQZ5 | CCPWGWSSYDEHCYQVFQQK | Negative |
| E2DQZ5 | GFCCPWGWSSYDEHCYQVFQ | Negative |
| E2DQZ5 | SLSGIGAGFCCPWGWSSYDE | Negative |
| E2DQZ5 | LLVVFLSLSGIGAGFCCPWG | Negative |
| E2DQZ5 | LVVFLSLSGIGAGFCCPWGW | Negative |
| E2DQZ5 | LSGIGAGFCCPWGWSSYDEH | Negative |
| E2DQZ5 | SFGLLVVFLSLSGIGAGFCC | Negative |
| E2DQZ5 | PWGWSSYDEHCYQVFQQKMN | Negative |
| E2DQZ5 | MVRFIFVSFGLLVVFLSLSG | Negative |
| E2DQZ5 | RFIFVSFGLLVVFLSLSGIG | Negative |
| E2DQZ5 | GWSSYDEHCYQVFQQKMNWE | Negative |
| E2DQZ5 | CPWGWSSYDEHCYQVFQQKM | Negative |
| E2DQZ5 | WGWSSYDEHCYQVFQQKMNW | Negative |
| E2DQZ5 | GLLVVFLSLSGIGAGFCCPW | Negative |
| E2DQZ5 | AGFCCPWGWSSYDEHCYQVF | Negative |
| E2DQZ5 | VSFGLLVVFLSLSGIGAGFC | Negative |
| E2DQZ5 | IFVSFGLLVVFLSLSGIGAG | Negative |
| E2DQZ5 | FVSFGLLVVFLSLSGIGAGF | Negative |
| E2DQZ5 | VRFIFVSFGLLVVFLSLSGI | Negative |
| E2DQZ5 | LSLSGIGAGFCCPWGWSSYD | Negative |
| E2DQZ5 | GAGFCCPWGWSSYDEHCYQV | Negative |

|        |                       |          |
|--------|-----------------------|----------|
| E2DQZ5 | VVFLSLSGIGAGFCCPWGWS  | Negative |
| E2DQZ5 | FLSLSGIGAGFCCPWGWSSY  | Negative |
| E2DQZ5 | SGIGAGFCCPWGWSSYDEHC  | Negative |
| E2DQZ5 | FCCPWGWSSYDEHCYQVFQQ  | Negative |
| E2DQZ5 | IGAGFCCPWGWSSYDEHCYQ  | Negative |
| E2DQZ5 | GIGAGFCCPWGWSSYDEHCY  | Negative |
| E2DQZ5 | FIFVSFGLLVVFLSLSGIGA  | Negative |
| E2DQZ5 | VFLSLSGIGAGFCCPWGWSS  | Negative |
| E2DQZ6 | SLSGTGADFDCCIPGWSAYDR | Negative |
| E2DQZ6 | FLSLSGTGADFDCCIPGWSAY | Negative |
| E2DQZ6 | TFVSFGLLVVFLSLSGTGAD  | Negative |
| E2DQZ6 | DCIPGWSAYDRYCYQAFSEP  | Negative |
| E2DQZ6 | GRFTFVSFGLLVVFLSLSGT  | Negative |
| E2DQZ6 | GWSAYDRYCYQAFSEPKNWE  | Negative |
| E2DQZ6 | LSGTGADFDCCIPGWSAYDRY | Negative |
| E2DQZ6 | DFDCIPGWSAYDRYCYQAFS  | Negative |
| E2DQZ6 | VSFGLLVVFLSLSGTGADFD  | Negative |
| E2DQZ6 | SGTGADFDCCIPGWSAYDRYC | Negative |
| E2DQZ6 | RFTFVSFGLLVVFLSLSGTG  | Negative |
| E2DQZ6 | CIPGWSAYDRYCYQAFSEPK  | Negative |
| E2DQZ6 | LLVVFLSLSGTGADFDCCIPG | Negative |
| E2DQZ6 | FVSFGLLVVFLSLSGTGADF  | Negative |
| E2DQZ6 | VVFLSLSGTGADFDCCIPGWS | Negative |
| E2DQZ6 | MGRFTFVSFGLLVVFLSLSG  | Negative |
| E2DQZ6 | LSLSGTGADFDCCIPGWSAYD | Negative |
| E2DQZ6 | SFGLLVVFLSLSGTGADFD   | Negative |
| E2DQZ6 | TGADFDCCIPGWSAYDRYCYQ | Negative |
| E2DQZ6 | IPGWSAYDRYCYQAFSEPKN  | Negative |
| E2DQZ6 | GADFDCCIPGWSAYDRYCYQA | Negative |
| E2DQZ6 | GLLVVFLSLSGTGADFDCCIP | Negative |
| E2DQZ6 | FTFVSFGLLVVFLSLSGTGA  | Negative |
| E2DQZ6 | VFLSLSGTGADFDCCIPGWSA | Negative |
| E2DQZ6 | GTGADFDCCIPGWSAYDRYCY | Negative |
| E2DQZ6 | ADFDCCIPGWSAYDRYCYQAF | Negative |
| E2DQZ6 | FDCIPGWSAYDRYCYQAFSE  | Negative |
| E2DQZ6 | PGWSAYDRYCYQAFSEPKNW  | Negative |
| E2DQZ6 | LVVFLSLSGTGADFDCCIPGW | Negative |
| E3PPC4 | KFKKTIGAMALTTMFVAVSA  | Negative |
| E3PPC4 | FVAVSASAVEKNITVTASVD  | Negative |
| E3PPC4 | AVEKNITVTASVDPVIDLLQ  | Negative |
| E3PPC4 | LTTMFVAVSASAVEKNITVT  | Negative |
| E3PPC4 | TTMFVAVSASAVEKNITVTA  | Negative |
| E3PPC4 | SASAVEKNITVTASVDPVID  | Negative |
| E3PPC4 | KKTIGAMALTTMFVAVSASA  | Negative |
| E3PPC4 | VSASAVEKNITVTASVDPVI  | Negative |
| E3PPC4 | MALTTMFVAVSASAVEKNIT  | Negative |

|        |                       |          |
|--------|-----------------------|----------|
| E3PPC4 | VEKNITVTASVDPVIDLLQA  | Negative |
| E3PPC4 | FKKTIGAMALTTMFVAVSAS  | Negative |
| E3PPC4 | GAMALTTMFVAVSASAVEKN  | Negative |
| E3PPC4 | MKFKKTIGAMALTTMFVAVS  | Negative |
| E3PPC4 | MFVAVSASAVEKNITVTASV  | Negative |
| E3PPC4 | TMFVAVSASAVEKNITVTAS  | Negative |
| E3PPC4 | ALTTMFVAVSASAVEKNITV  | Negative |
| E3PPC4 | KNITVTASVDPVIDLLQADG  | Negative |
| E3PPC4 | ITVTASVDPVIDLLQADGNA  | Negative |
| E3PPC4 | TVTASVDPVIDLLQADGNAL  | Negative |
| E3PPC4 | KTIGAMALTTMFVAVSASAV  | Negative |
| E3PPC4 | NITVTASVDPVIDLLQADGN  | Negative |
| E3PPC4 | VTASVDPVIDLLQADGNALP  | Negative |
| E3PPC4 | TIGAMALTTMFVAVSASAVE  | Negative |
| E3PPC4 | SAVEKNITVTASVDPVIDLL  | Negative |
| E3PPC4 | VAVSASAVEKNITVTASVDP  | Negative |
| E3PPC4 | EKNITVTASVDPVIDLLQAD  | Negative |
| E3PPC4 | AVSASAVEKNITVTASVDPV  | Negative |
| E3PPC4 | IGAMALTTMFVAVSASAVEK  | Negative |
| E3PPC4 | ASAVEKNITVTASVDPVIDL  | Negative |
| E3W9M2 | KFEIVLLVSWWLLLVLVFGV  | Negative |
| E3W9M2 | SSMFSEFDRLDFPKHFIFGA  | Negative |
| E3W9M2 | LLVSWWLLLVLVFGVESSMF  | Negative |
| E3W9M2 | SMFSEFDRLDFPKHFIFGAS  | Negative |
| E3W9M2 | WWLLLVLVFGVESSMFSEFD  | Negative |
| E3W9M2 | VSWWLLLVLVFGVESSMFSE  | Negative |
| E3W9M2 | GVESSMFSEFDRLDFPKHFI  | Negative |
| E3W9M2 | FEIVLLVSWWLLLVLVFGVE  | Negative |
| E3W9M2 | LVSWWLLLVLVFGVESSMFS  | Negative |
| E3W9M2 | FGVESSMFSEFDRLDFPKHF  | Negative |
| E3W9M2 | ESSMFSEFDRLDFPKHFIFG  | Negative |
| E3W9M2 | MFSEFDRLDFPKHFIFGASS  | Negative |
| E3W9M2 | LVFGVESSMFSEFDRLDFPK  | Negative |
| E3W9M2 | VESSMFSEFDRLDFPKHFIF  | Negative |
| E3W9M2 | LLVLVFGVESSMFSEFDRLD  | Negative |
| E3W9M2 | NMSCKFEIVLLVSWWLLLVL  | Negative |
| E3W9M2 | VFGVESSMFSEFDRLDFPKH  | Negative |
| E3W9M2 | IVLLVSWWLLLVLVFGVESS  | Negative |
| E3W9M2 | LVLVFGVESSMFSEFDRLDF  | Negative |
| E3W9M2 | FSEFDRLDFPKHFIFGASSC  | Negative |
| E3W9M2 | VLLVSWWLLLVLVFGVESSM  | Negative |
| E3W9M2 | LLLVLVFGVESSMFSEFDRL  | Negative |
| E3W9M2 | MNMSCKFEIVLLVSWWLLLVL | Negative |
| E3W9M2 | EIVLLVSWWLLLVLVFGVES  | Negative |
| E3W9M2 | SWWLLLVLVFGVESSMFSEF  | Negative |
| E3W9M2 | VLVFGVESSMFSEFDRLDFP  | Negative |

|        |                      |          |
|--------|----------------------|----------|
| E3W9M2 | SCKFEIVLLVSWWLLLVLVF | Negative |
| E3W9M2 | MSCKFEIVLLVSWWLLLVLV | Negative |
| E3W9M2 | CKFEIVLLVSWWLLLVLVFG | Negative |
| E6Y8S8 | AVMLMVVVINHPAVVEGLTC | Negative |
| E6Y8S8 | MGVSKVAIAVAVMLMVVVIN | Negative |
| E6Y8S8 | GVSKVAIAVAVMLMVVVINH | Negative |
| E6Y8S8 | GLTCGQVTGKLGGCLGYLKG | Negative |
| E6Y8S8 | VEGLTCGQVTGKLGGCLGYL | Negative |
| E6Y8S8 | AVAVMLMVVVINHPAVVEGL | Negative |
| E6Y8S8 | MVVVINHPAVVEGLTCGQVT | Negative |
| E6Y8S8 | VAIAVAVMLMVVVINHPAVV | Negative |
| E6Y8S8 | HPAVVEGLTCGQVTGKLGGC | Negative |
| E6Y8S8 | LTCGQVTGKLGGCLGYLKGG | Negative |
| E6Y8S8 | EGLTCGQVTGKLGGCLGYLK | Negative |
| E6Y8S8 | VVEGLTCGQVTGKLGGCLGY | Negative |
| E6Y8S8 | VSKVAIAVAVMLMVVVINHP | Negative |
| E6Y8S8 | VINHPAVVEGLTCGQVTGKL | Negative |
| E6Y8S8 | PAVVEGLTCGQVTGKLGGCL | Negative |
| E6Y8S8 | IAVAVMLMVVVINHPAVVEG | Negative |
| E6Y8S8 | TCGQVTGKLGGCLGYLKGGG | Negative |
| E6Y8S8 | VMLMVVVINHPAVVEGLTCG | Negative |
| E6Y8S8 | SKVAIAVAVMLMVVVINHPA | Negative |
| E6Y8S8 | VAVMLMVVVINHPAVVEGLT | Negative |
| E6Y8S8 | LMVVVINHPAVVEGLTCGQV | Negative |
| E6Y8S8 | VVINHPAVVEGLTCGQVTGK | Negative |
| E6Y8S8 | NHPAVVEGLTCGQVTGKLGG | Negative |
| E6Y8S8 | AIAVAVMLMVVVINHPAVVE | Negative |
| E6Y8S8 | VVVINHPAVVEGLTCGQVTG | Negative |
| E6Y8S8 | AVVEGLTCGQVTGKLGGCLG | Negative |
| E6Y8S8 | CGQVTGKLGGCLGYLKGGGY | Negative |
| E6Y8S8 | INHPAVVEGLTCGQVTGKLG | Negative |
| E6Y8S8 | KVAIAVAVMLMVVVINHPAV | Negative |
| E7BLC7 | NCKYSCDIREKWEYCTPLCK | Negative |
| E7BLC7 | GYPVHDGTNCKYSCDIREKW | Negative |
| E7BLC7 | YSDRDGYPVHDGTNCKYSCD | Negative |
| E7BLC7 | MKIIFLVLMILSEVYSDRD  | Negative |
| E7BLC7 | PVHDGTNCKYSCDIREKWEY | Negative |
| E7BLC7 | ILSEVYSDRDGYPVHDGTNC | Negative |
| E7BLC7 | VHDGTNCKYSCDIREKWEYC | Negative |
| E7BLC7 | HDGTNCKYSCDIREKWEYCT | Negative |
| E7BLC7 | LVLMMILSEVYSDRDGYPVH | Negative |
| E7BLC7 | LMMILSEVYSDRDGYPVHDG | Negative |
| E7BLC7 | MILSEVYSDRDGYPVHDGTN | Negative |
| E7BLC7 | DRDGYPVHDGTNCKYSCDIR | Negative |
| E7BLC7 | YPVHDGTNCKYSCDIREKWE | Negative |
| E7BLC7 | TNCKYSCDIREKWEYCTPLC | Negative |

|        |                      |          |
|--------|----------------------|----------|
| E7BLC7 | MMILSEVYSDRDGYPVHDGT | Negative |
| E7BLC7 | DGTNCKYSCDIREKWEYCTP | Negative |
| E7BLC7 | LSEVYSDRDGYPVHDGTNCK | Negative |
| E7BLC7 | FLVLMILSEVYSDRDGYPV  | Negative |
| E7BLC7 | GTNCKYSCDIREKWEYCTPL | Negative |
| E7BLC7 | VLMILSEVYSDRDGYPVHD  | Negative |
| E7BLC7 | VYSDRDGYPVHDGTNCKYSC | Negative |
| E7BLC7 | IFLVLMILSEVYSDRDGYP  | Negative |
| E7BLC7 | RDGYPVHDGTNCKYSCDIRE | Negative |
| E7BLC7 | CKYSCDIREKWEYCTPLCKR | Negative |
| E7BLC7 | EVYSDRDGYPVHDGTNCKYS | Negative |
| E7BLC7 | SDRDGYPVHDGTNCKYSCDI | Negative |
| E7BLC7 | KIIFLVLMILSEVYSDRDG  | Negative |
| E7BLC7 | SEVYSDRDGYPVHDGTNCKY | Negative |
| E7BLC7 | DGYPVHDGTNCKYSCDIREK | Negative |
| E7CLP2 | FIASFMLIGVECKEGYPMG  | Negative |
| E7CLP2 | IGVECKEGYPMGRDGCKISC | Negative |
| E7CLP2 | KISCVINNNFCKVEQAKWR  | Negative |
| E7CLP2 | GVECKEGYPMGRDGCKISCV | Negative |
| E7CLP2 | ILIFIIASFMLIGVECKEGY | Negative |
| E7CLP2 | CKEGYPMGRDGCKISCVINN | Negative |
| E7CLP2 | GCKISCVINNNFCKVEQAK  | Negative |
| E7CLP2 | VECKEGYPMGRDGCKISCVI | Negative |
| E7CLP2 | EGYPMGRDGCKISCVINNNF | Negative |
| E7CLP2 | IASFMLIGVECKEGYPMGRD | Negative |
| E7CLP2 | IFIIASFMLIGVECKEGYPM | Negative |
| E7CLP2 | ECKEGYPMGRDGCKISCVIN | Negative |
| E7CLP2 | MKILIFIIASFMLIGVECKE | Negative |
| E7CLP2 | DGCKISCVINNNFCKVEQQA | Negative |
| E7CLP2 | LIGVECKEGYPMGRDGCKIS | Negative |
| E7CLP2 | MGRDGCKISCVINNNFCKVE | Negative |
| E7CLP2 | CKISCVINNNFCKVEQAKW  | Negative |
| E7CLP2 | RDGCKISCVINNNFCKVEQ  | Negative |
| E7CLP2 | FMLIGVECKEGYPMGRDGCK | Negative |
| E7CLP2 | MLIGVECKEGYPMGRDGCKI | Negative |
| E7CLP2 | SFMLIGVECKEGYPMGRDGC | Negative |
| E7CLP2 | ASFMLIGVECKEGYPMGRDG | Negative |
| E7CLP2 | GRDGCKISCVINNNFCKVEC | Negative |
| E7CLP2 | IIASFMLIGVECKEGYPMGR | Negative |
| E7CLP2 | PMGRDGCKISCVINNNFCKV | Negative |
| E7CLP2 | GYPMGRDGCKISCVINNNFC | Negative |
| E7CLP2 | KEGYPMGRDGCKISCVINN  | Negative |
| E7CLP2 | YPMGRDGCKISCVINNNFCK | Negative |
| E7CLP2 | KILIFIIASFMLIGVECKEG | Negative |
| E9K9Z1 | GGKPAWCWYTLAMCGAGYDS | Negative |
| E9K9Z1 | TISEISKAQNNGGKPAWCWY | Negative |



|        |                       |          |
|--------|-----------------------|----------|
| E9K9Z1 | AQNNGGKPAWCWYTLAMCGA  | Negative |
| E9K9Z1 | SKLVKTLTISEISKAQNNGG  | Negative |
| E9K9Z1 | WCWYTLAMCGAGYDSGTCDY  | Negative |
| E9K9Z1 | WYTLAMCGAGYDSGTCDYMY  | Negative |
| E9K9Z1 | EISKAQNNGGKPAWCWYTLA  | Negative |
| E9K9Z1 | ISEISKAQNNGGKPAWCWYT  | Negative |
| E9K9Z1 | LTISEISKAQNNGGKPAWCW  | Negative |
| E9K9Z1 | KAQNNGGKPAWCWYTLAMCG  | Negative |
| E9K9Z1 | NNGGKPAWCWYTLAMCGAGY  | Negative |
| E9K9Z1 | SEISKAQNNGGKPAWCWYTL  | Negative |
| E9K9Z1 | VKTLTISEISKAQNNGGKPA  | Negative |
| E9K9Z1 | KPAWCWYTLAMCGAGYDSGT  | Negative |
| E9K9Z1 | TLAMCGAGYDSGTCDYMYSH  | Negative |
| E9K9Z1 | KTLTISEISKAQNNGGKPAW  | Negative |
| E9K9Z1 | AWCWYTLAMCGAGYDSGTCD  | Negative |
| E9K9Z1 | KLVKTLTISEISKAQNNGGK  | Negative |
| E9K9Z1 | QNNGGKPAWCWYTLAMCGAG  | Negative |
| E9K9Z1 | MSKLVKTLTISEISKAQNNG  | Negative |
| E9K9Z1 | NNGGKPAWCWYTLAMCGAGYD | Negative |
| E9K9Z1 | YTLAMCGAGYDSGTCDYMYS  | Negative |
| E9K9Z1 | GKPAWCWYTLAMCGAGYDSG  | Negative |
| E9K9Z1 | PAWCWYTLAMCGAGYDSGTC  | Negative |
| E9K9Z1 | LAMCGAGYDSGTCDYMYSHC  | Negative |
| E9K9Z1 | ISKAQNNGGKPAWCWYTLAM  | Negative |
| E9K9Z1 | SKAQNNGGKPAWCWYTLAMC  | Negative |
| E9K9Z1 | CWYTLAMCGAGYDSGTCDYM  | Negative |
| E9K9Z1 | LVKTLTISEISKAQNNGGKP  | Negative |
| F1AWB0 | EAGIWSSIKNLASKAWNSDI  | Negative |
| F1AWB0 | MNAKTLFVVFLIGMLVTEQV  | Negative |
| F1AWB0 | IWSSIKNLASKAWNSDIGQS  | Negative |
| F1AWB0 | GIWSSIKNLASKAWNSDIGQ  | Negative |
| F1AWB0 | KTLFVVFLIGMLVTEQVEAG  | Negative |
| F1AWB0 | LIGMLVTEQVEAGIWSSIKN  | Negative |
| F1AWB0 | WSSIKNLASKAWNSDIGQSL  | Negative |
| F1AWB0 | TLFVVFLIGMLVTEQVEAGI  | Negative |
| F1AWB0 | FVVFLIGMLVTEQVEAGIWS  | Negative |
| F1AWB0 | GMLVTEQVEAGIWSSIKNLA  | Negative |
| F1AWB0 | QVEAGIWSSIKNLASKAWNS  | Negative |
| F1AWB0 | NAKTLFVVFLIGMLVTEQVE  | Negative |
| F1AWB0 | VTEQVEAGIWSSIKNLASKA  | Negative |
| F1AWB0 | SSIKNLASKAWNSDIGQSLR  | Negative |
| F1AWB0 | TEQVEAGIWSSIKNLASKAW  | Negative |
| F1AWB0 | NLASKAWNSDIGQSLRNKAA  | Negative |
| F1AWB0 | AKTLFVVFLIGMLVTEQVEA  | Negative |
| F1AWB0 | LVTEQVEAGIWSSIKNLASK  | Negative |
| F1AWB0 | VFLIGMLVTEQVEAGIWSSI  | Negative |

|        |                       |          |
|--------|-----------------------|----------|
| F1AWB0 | SIKNLASKAWNSDIGQSLRN  | Negative |
| F1AWB0 | AGIWSSIKNLASKAWNSDIG  | Negative |
| F1AWB0 | IGMLVTEQVEAGIWSSIKNL  | Negative |
| F1AWB0 | LFVVFLIGMLVTEQVEAGIW  | Negative |
| F1AWB0 | VEAGIWSSIKNLASKAWNSD  | Negative |
| F1AWB0 | IKNLASKAWNSDIGQSLRNK  | Negative |
| F1AWB0 | MLVTEQVEAGIWSSIKNLAS  | Negative |
| F1AWB0 | FLIGMLVTEQVEAGIWSSIK  | Negative |
| F1AWB0 | KNLASKAWNSDIGQSLRNKA  | Negative |
| F1AWB0 | EQVEAGIWSSIKNLASKAWN  | Negative |
| F1N5C8 | ARRKLLVFLLDGFRADYISD  | Negative |
| F1N5C8 | RRKLLVFLLDGFRADYISDE  | Negative |
| F1N5C8 | SLAQPASARRKLLVFLLDGF  | Negative |
| F1N5C8 | LAQPASARRKLLVFLLDGFR  | Negative |
| F1N5C8 | QPASARRKLLVFLLDGFRAD  | Negative |
| F1N5C8 | AQPASARRKLLVFLLDGFRA  | Negative |
| F1N5C8 | PASARRKLLVFLLDGFRADY  | Negative |
| F1N5C8 | KLGVLLLALVLSLAQPASAR  | Negative |
| F1N5C8 | GVLLLALVLSLAQPASARRK  | Negative |
| F1N5C8 | SARRKLLVFLLDGFRADYIS  | Negative |
| F1N5C8 | VFLLDGFRADYISDEALES   | Negative |
| F1N5C8 | LVLSLAQPASARRKLLVFL   | Negative |
| F1N5C8 | LALVLSLAQPASARRKLLVF  | Negative |
| F1N5C8 | LLDGFRADYISDEALES     | Negative |
| F1N5C8 | LGVLLLALVLSLAQPASARR  | Negative |
| F1N5C8 | LVFLLDGFRADYISDEALES  | Negative |
| F1N5C8 | LLVFLLDGFRADYISDEALE  | Negative |
| F1N5C8 | GKLGVLLLALVLSLAQPASA  | Negative |
| F1N5C8 | LLALVLSLAQPASARRKLLV  | Negative |
| F1N5C8 | LSLAQPASARRKLLVFLLDG  | Negative |
| F1N5C8 | ASARRKLLVFLLDGFRADYI  | Negative |
| F1N5C8 | FLLDGFRADYISDEALES    | Negative |
| F1N5C8 | MAGKLGVLLLALVLSLAQPA  | Negative |
| F1N5C8 | ALVLSLAQPASARRKLLVFL  | Negative |
| F1N5C8 | KLLVFLLDGFRADYISDEAL  | Negative |
| F1N5C8 | RKLLVFLLDGFRADYISDEA  | Negative |
| F1N5C8 | VLLLALVLSLAQPASARRKL  | Negative |
| F1N5C8 | VLSLAQPASARRKLLVFLLD  | Negative |
| F1N5C8 | AGKLGVLLLALVLSLAQPAS  | Negative |
| F1NSM7 | RATLFCCLCLLGTVPVPTPV  | Negative |
| F1NSM7 | NCPGQHQILLKGCNTKHGFY  | Negative |
| F1NSM7 | CLLGTVPVPTPVSLPARARGN | Negative |
| F1NSM7 | CLCLLGTVPVPTPVSLPARAR | Negative |
| F1NSM7 | VSLPARARGNCPGQHQILLK  | Negative |
| F1NSM7 | VLPTPVSLPARARGNCPGQH  | Negative |
| F1NSM7 | ATLFCCLCLLGTVPVPTVS   | Negative |

|        |                       |          |
|--------|-----------------------|----------|
| F1NSM7 | LFCLCLCLLGTVLPTPVSLP  | Negative |
| F1NSM7 | LGTVLPTPVSLPARARGNCP  | Negative |
| F1NSM7 | LPTPVSLPARARGNCPGQHQ  | Negative |
| F1NSM7 | LCLCLLGTVLPTPVSLPARA  | Negative |
| F1NSM7 | PARARGNCPGQHQILLKGCN  | Negative |
| F1NSM7 | LPARARGNCPGQHQILLKGC  | Negative |
| F1NSM7 | GTVLPTPVSLPARARGNCPG  | Negative |
| F1NSM7 | LCLLGTVLPTPVSLPARARG  | Negative |
| F1NSM7 | PTPVSLPARARGNCPGQHQI  | Negative |
| F1NSM7 | PVSLPARARGNCPGQHQILL  | Negative |
| F1NSM7 | TVLPTPVSLPARARGNCPGQ  | Negative |
| F1NSM7 | GNCPGQHQILLKGCNTKHGF  | Negative |
| F1NSM7 | LLGTVLPTPVSLPARARGNC  | Negative |
| F1NSM7 | ARGNCPGQHQILLKGCNTKH  | Negative |
| F1NSM7 | RARGNCPGQHQILLKGCNTK  | Negative |
| F1NSM7 | FCLCLCLLGTVLPTPVSLPA  | Negative |
| F1NSM7 | CLCLCLLGTVLPTPVSLPAR  | Negative |
| F1NSM7 | MRATLFCLCLCLLGTVLPTP  | Negative |
| F1NSM7 | SLPARARGNCPGQHQILLKG  | Negative |
| F1NSM7 | RGNCPGQHQILLKGCNTKHG  | Negative |
| F1NSM7 | ARARGNCPGQHQILLKGCNT  | Negative |
| F1NSM7 | TPVSLPARARGNCPGQHQIL  | Negative |
| F5CPD3 | DDSNIPSERTPKRCQGGYNI  | Negative |
| F5CPD3 | NIPSERTPKRCQGGYNICYK  | Negative |
| F5CPD3 | GNTRICDDSNIPSERTPKRC  | Negative |
| F5CPD3 | MKTLLTLVVVTIVCLDLGN   | Negative |
| F5CPD3 | KTLLTLVVVTIVCLDLGNT   | Negative |
| F5CPD3 | TLLTLVVVTIVCLDLGNTR   | Negative |
| F5CPD3 | LTLVVVTIVCLDLGNTRICD  | Negative |
| F5CPD3 | CDDSNIPSERTPKRCQGGYN  | Negative |
| F5CPD3 | LLTLVVVTIVCLDLGNTRIC  | Negative |
| F5CPD3 | IVCLDLGNTRICDDSNIPSE  | Negative |
| F5CPD3 | LVVVVTIVCLDLGNTRICDDS | Negative |
| F5CPD3 | IPSERTPKRCQGGYNICYKI  | Negative |
| F5CPD3 | VVVVTIVCLDLGNTRICDDSN | Negative |
| F5CPD3 | LLLTLVVVTIVCLDLGNTRI  | Negative |
| F5CPD3 | DSNIPSERTPKRCQGGYNIC  | Negative |
| F5CPD3 | VCLDLGNTRICDDSNIPSER  | Negative |
| F5CPD3 | VTIVCLDLGNTRICDDSNIP  | Negative |
| F5CPD3 | SNIPSERTPKRCQGGYNICY  | Negative |
| F5CPD3 | LDLGNTRICDDSNIPSERTP  | Negative |
| F5CPD3 | CLDLGNTRICDDSNIPSER   | Negative |
| F5CPD3 | ICDDSNIPSERTPKRCQGGY  | Negative |
| F5CPD3 | VVTIVCLDLGNTRICDDSN   | Negative |
| F5CPD3 | TIVCLDLGNTRICDDSNIPS  | Negative |
| F5CPD3 | TRICDDSNIPSERTPKRCQG  | Negative |

|        |                      |          |
|--------|----------------------|----------|
| F5CPD3 | NTRICDDSNIPSERTPKRCQ | Negative |
| F5CPD3 | LGNTRICDDSNIPSERTPKR | Negative |
| F5CPD3 | RICDDSNIPSERTPKRCQGG | Negative |
| F5CPD3 | DLGNTRICDDSNIPSERTPK | Negative |
| F5CPD3 | PSERTPKRCQGGYNICYKIN | Negative |
| F5CPD5 | LLLTLVVVTVVCLDFGHTMI | Negative |
| F5CPD5 | HTMICYNQQSSQPPTTTTCS | Negative |
| F5CPD5 | ICYNQQSSQPPTTTTCSEGQ | Negative |
| F5CPD5 | VVTVVCLDFGHTMICYNQQS | Negative |
| F5CPD5 | GHTMICYNQQSSQPPTTTTC | Negative |
| F5CPD5 | KTLLTLVVVTVVCLDFGHT  | Negative |
| F5CPD5 | TLLTLVVVTVVCLDFGHTM  | Negative |
| F5CPD5 | CYNQQSSQPPTTTTCSEGQC | Negative |
| F5CPD5 | YNQQSSQPPTTTTCSEGQCY | Negative |
| F5CPD5 | QQSSQPPTTTTCSEGQCYKK | Negative |
| F5CPD5 | SSQPPTTTTCSEGQCYKKTW | Negative |
| F5CPD5 | LVVVTVVCLDFGHTMICYNQ | Negative |
| F5CPD5 | DFGHTMICYNQQSSQPPTTT | Negative |
| F5CPD5 | LTLVVVTVVCLDFGHTMICY | Negative |
| F5CPD5 | QSSQPPTTTTCSEGQCYKKT | Negative |
| F5CPD5 | VVCLDFGHTMICYNQQSSQP | Negative |
| F5CPD5 | LDFGHTMICYNQQSSQPPTT | Negative |
| F5CPD5 | TVVCLDFGHTMICYNQQSSQ | Negative |
| F5CPD5 | VCLDFGHTMICYNQQSSQP  | Negative |
| F5CPD5 | LLTLVVVTVVCLDFGHTMIC | Negative |
| F5CPD5 | VVVTVVCLDFGHTMICYNQQ | Negative |
| F5CPD5 | FGHTMICYNQQSSQPPTTTT | Negative |
| F5CPD5 | MICYNQQSSQPPTTTTCSEG | Negative |
| F5CPD5 | CLDFGHTMICYNQQSSQPPT | Negative |
| F5CPD5 | NQQSSQPPTTTTCSEGQCYK | Negative |
| F5CPD5 | MKTLLTLVVVTVVCLDFGH  | Negative |
| F5CPD5 | SQPPTTTTCSEGQCYKKTWS | Negative |
| F5CPD5 | TMICYNQQSSQPPTTTTCSE | Negative |
| F5CPD5 | VTVVCLDFGHTMICYNQQSS | Negative |
| F5CPD8 | YNQQSSQPPTTTTCSEGQCY | Negative |
| F5CPD8 | DFGHTMICYNQQSSQPPTTT | Negative |
| F5CPD8 | MICYNQQSSQPPTTTTCSEG | Negative |
| F5CPD8 | TMICYNQQSSQPPTTTTCSE | Negative |
| F5CPD8 | LTLVVVTIVCLDFGHTMICY | Negative |
| F5CPD8 | VVVTIVCLDFGHTMICYNQQ | Negative |
| F5CPD8 | TLLTLVVVTIVCLDFGHTM  | Negative |
| F5CPD8 | GHTMICYNQQSSQPPTTTTC | Negative |
| F5CPD8 | VTIVCLDFGHTMICYNQQSS | Negative |
| F5CPD8 | VCLDFGHTMICYNQQSSQP  | Negative |
| F5CPD8 | QQSSQPPTTTTCSEGQCYKQ | Negative |
| F5CPD8 | MKTLLTLVVVTIVCLDFGH  | Negative |

|        |                       |          |
|--------|-----------------------|----------|
| F5CPD8 | ICYNQQSSQPPTTTTCSEGO  | Negative |
| F5CPD8 | IVCLDFGHTMICYNQQSSQP  | Negative |
| F5CPD8 | LDFGHTMICYNQQSSQPPTT  | Negative |
| F5CPD8 | VVTIVCLDFGHTMICYNQQS  | Negative |
| F5CPD8 | TIVCLDFGHTMICYNQQSSQ  | Negative |
| F5CPD8 | SQPPTTTTCSEGQCYKQRWR  | Negative |
| F5CPD8 | LLTLVVVTIVCLDFGHTMIC  | Negative |
| F5CPD8 | QSSQPPTTTTCSEGQCYKQR  | Negative |
| F5CPD8 | LVVVTIVCLDFGHTMICYNQ  | Negative |
| F5CPD8 | LLLTLVVVTIVCLDFGHTMI  | Negative |
| F5CPD8 | KTLLTLVVVTIVCLDFGHT   | Negative |
| F5CPD8 | FGHTMICYNQQSSQPPTTTT  | Negative |
| F5CPD8 | SSQPPTTTTCSEGQCYKQRW  | Negative |
| F5CPD8 | NQQSSQPPTTTTCSEGQCYK  | Negative |
| F5CPD8 | CYNQQSSQPPTTTTCSEGQC  | Negative |
| F5CPD8 | CLDFGHTMICYNQQSSQPPT  | Negative |
| F5CPD8 | HTMICYNQQSSQPPTTTTCS  | Negative |
| F5CPE2 | LVVVTIVCLDLGNSLICYS   | Negative |
| F5CPE2 | LICYVSEYGAKMTCPEGKTL  | Negative |
| F5CPE2 | CLDLGNSLICYSVSEYGAKMT | Negative |
| F5CPE2 | YVSEYGAKMTCPEGKTLCEK  | Negative |
| F5CPE2 | RTLLTLVVVTIVCLDLGNS   | Negative |
| F5CPE2 | LTLLVVVTIVCLDLGNSLIC  | Negative |
| F5CPE2 | LLLTLVVVTIVCLDLGNSLI  | Negative |
| F5CPE2 | LLTLVVVTIVCLDLGNSLIC  | Negative |
| F5CPE2 | LGNSLICYSVSEYGAKMTCPE | Negative |
| F5CPE2 | EYGAKMTCPEGKTLCEKYAV  | Negative |
| F5CPE2 | TIVCLDLGNSLICYSVSEYGA | Negative |
| F5CPE2 | ICYVSEYGAKMTCPEGKTLCE | Negative |
| F5CPE2 | LDLGNSLICYSVSEYGAKMTC | Negative |
| F5CPE2 | VVVTIVCLDLGNSLICYSVSE | Negative |
| F5CPE2 | VVTIVCLDLGNSLICYSVSEY | Negative |
| F5CPE2 | TLLTLVVVTIVCLDLGNSL   | Negative |
| F5CPE2 | MRTLLTLVVVTIVCLDLGN   | Negative |
| F5CPE2 | SLICYVSEYGAKMTCPEGKT  | Negative |
| F5CPE2 | VSEYGAKMTCPEGKTLCEKY  | Negative |
| F5CPE2 | GAKMTCPEGKTLCEKYAVPL  | Negative |
| F5CPE2 | NSLICYSVSEYGAKMTCPEGK | Negative |
| F5CPE2 | SEYGAKMTCPEGKTLCEKYA  | Negative |
| F5CPE2 | IVCLDLGNSLICYSVSEYGAK | Negative |
| F5CPE2 | DLGNSLICYSVSEYGAKMTCP | Negative |
| F5CPE2 | VTIVCLDLGNSLICYSVSEYG | Negative |
| F5CPE2 | VCLDLGNSLICYSVSEYGAKM | Negative |
| F5CPE2 | YGAKMTCPEGKTLCEKYAVP  | Negative |
| F5CPE2 | CYSVSEYGAKMTCPEGKTLCE | Negative |
| F5CPE2 | GNSLICYSVSEYGAKMTCPEG | Negative |

|        |                       |          |
|--------|-----------------------|----------|
| F5CPE3 | TVTCHKTDVFTKTCISPICY  | Negative |
| F5CPE3 | KTDVFTKTCISPICYEKITS  | Negative |
| F5CPE3 | GHTVTCHKTDVFTKTCISPI  | Negative |
| F5CPE3 | CHKTDVFTKTCISPICYEKI  | Negative |
| F5CPE3 | TCHKTDVFTKTCISPICYEK  | Negative |
| F5CPE3 | HKTDVFTKTCISPICYEKIT  | Negative |
| F5CPE3 | VTCHKTDVFTKTCISPICYE  | Negative |
| F5CPE3 | VTILCLDFGHTVTCHKTDVF  | Negative |
| F5CPE3 | ILCLDFGHTVTCHKTDVFTK  | Negative |
| F5CPE3 | LLTLVVVTILCLDFGHTVT   | Negative |
| F5CPE3 | FTKTCISPICYEKITSAFII  | Negative |
| F5CPE3 | VVVVTILCLDFGHTVTCHKTD | Negative |
| F5CPE3 | LDFGHTVTCHKTDVFTKTCI  | Negative |
| F5CPE3 | LVVVVTILCLDFGHTVTCHKT | Negative |
| F5CPE3 | TDVFTKTCISPICYEKITSA  | Negative |
| F5CPE3 | LLTLVVVTILCLDFGHTVTC  | Negative |
| F5CPE3 | MKTLLLTLVVVTILCLDFGH  | Negative |
| F5CPE3 | TILCLDFGHTVTCHKTDVFT  | Negative |
| F5CPE3 | VVTILCLDFGHTVTCHKTDV  | Negative |
| F5CPE3 | LCLDFGHTVTCHKTDVFTKT  | Negative |
| F5CPE3 | KTLLLTLVVVTILCLDFGHT  | Negative |
| F5CPE3 | HTVTCHKTDVFTKTCISPIC  | Negative |
| F5CPE3 | CLDFGHTVTCHKTDVFTKTC  | Negative |
| F5CPE3 | DVFTKTCISPICYEKITSAF  | Negative |
| F5CPE3 | VFTKTCISPICYEKITSAFI  | Negative |
| F5CPE3 | FGHTVTCHKTDVFTKTCISP  | Negative |
| F5CPE3 | TLLLTLVVVTILCLDFGHTV  | Negative |
| F5CPE3 | DFGHTVTCHKTDVFTKTCIS  | Negative |
| F5CPE3 | LTLVVVTILCLDFGHTVTCH  | Negative |
| F5CPE4 | HTLICYNYETPLDKTTECCG  | Negative |
| F5CPE4 | KTLLLTLVVVTIVCLDFGHT  | Negative |
| F5CPE4 | ETPLDKTTECCGNGVTTCTFA | Negative |
| F5CPE4 | LLTLVVVTIVCLDFGHTLIC  | Negative |
| F5CPE4 | YNYETPLDKTTECCGNGVTT  | Negative |
| F5CPE4 | VTIVCLDFGHTLICYNYETP  | Negative |
| F5CPE4 | DFGHTLICYNYETPLDKTTE  | Negative |
| F5CPE4 | TLICYNYETPLDKTTECCGN  | Negative |
| F5CPE4 | IVCLDFGHTLICYNYETPLD  | Negative |
| F5CPE4 | VCLDFGHTLICYNYETPLDK  | Negative |
| F5CPE4 | TPLDKTTECCGNGVTTCTFAK | Negative |
| F5CPE4 | LICYNYETPLDKTTECCGNG  | Negative |
| F5CPE4 | TLLLTLVVVTIVCLDFGHTL  | Negative |
| F5CPE4 | YETPLDKTTECCGNGVTTCTF | Negative |
| F5CPE4 | FGHTLICYNYETPLDKTTEC  | Negative |
| F5CPE4 | CYNYETPLDKTTECCGNGVT  | Negative |
| F5CPE4 | LTLVVVTIVCLDFGHTLIC   | Negative |

|        |                       |          |
|--------|-----------------------|----------|
| F5CPE4 | VVTIVCLDFGHTLICYNYET  | Negative |
| F5CPE4 | MKTLLLTLVVVTIVCLDFGH  | Negative |
| F5CPE4 | LDFGHTLICYNYETPLDKTT  | Negative |
| F5CPE4 | LLLTLVVVTIVCLDFGHTLI  | Negative |
| F5CPE4 | NYETPLDKTTECCGNGVTTC  | Negative |
| F5CPE4 | CLDFGHTLICYNYETPLDKT  | Negative |
| F5CPE4 | ICYNYETPLDKTTECCGNGV  | Negative |
| F5CPE4 | GHTLICYNYETPLDKTTECC  | Negative |
| F5CPE4 | VVVTIVCLDFGHTLICYNYE  | Negative |
| F5CPE4 | LVVVTIVCLDFGHTLICYNY  | Negative |
| F5CPE4 | TIVCLDFGHTLICYNYETPL  | Negative |
| F5CPE4 | PLDKTTECCGNGVTTCTFAKS | Negative |
| F7J1C8 | TFPFVDAATVIPANSFSSFS  | Negative |
| F7J1C8 | FSSFSTYWNNFYWPWGTDHNG | Negative |
| F7J1C8 | ATVIPANSFSSFSTYWNNFY  | Negative |
| F7J1C8 | FPFVDAATVIPANSFSSFST  | Negative |
| F7J1C8 | ANSFSSFSTYWNNFYWPWGT  | Negative |
| F7J1C8 | AAPGTFFPFVDAATVIPANSF | Negative |
| F7J1C8 | LAAPGTFFPFVDAATVIPANS | Negative |
| F7J1C8 | CLAAPGTFFPFVDAATVIPAN | Negative |
| F7J1C8 | VIPANSFSSFSTYWNNFYWP  | Negative |
| F7J1C8 | KLFVVLACLAAPGTFFPFVDA | Negative |
| F7J1C8 | AATVIPANSFSSFSTYWNNF  | Negative |
| F7J1C8 | SFSSFSTYWNNFYWPWGTDHN | Negative |
| F7J1C8 | FVDAATVIPANSFSSFSTYW  | Negative |
| F7J1C8 | TVIPANSFSSFSTYWNNFY   | Negative |
| F7J1C8 | GTFPFVDAATVIPANSFSSF  | Negative |
| F7J1C8 | MKLFVVLACLAAPGTFFPFVD | Negative |
| F7J1C8 | PANSFSSFSTYWNNFYPWGT  | Negative |
| F7J1C8 | PFVDAATVIPANSFSSFSTY  | Negative |
| F7J1C8 | LFVVLACLAAPGTFFPFVDAA | Negative |
| F7J1C8 | VDAATVIPANSFSSFSTYWN  | Negative |
| F7J1C8 | IPANSFSSFSTYWNNFYPWG  | Negative |
| F7J1C8 | VVLACLAAPGTFFPFVDAATV | Negative |
| F7J1C8 | ACLAAPGTFFPFVDAATVIPA | Negative |
| F7J1C8 | VLACLAAPGTFFPFVDAATVI | Negative |
| F7J1C8 | FVVLACLAAPGTFFPFVDAAT | Negative |
| F7J1C8 | PGTFFPFVDAATVIPANSFSS | Negative |
| F7J1C8 | NSFSSFSTYWNNFYPWGTDH  | Negative |
| F7J1C8 | APGTFFPFVDAATVIPANSFS | Negative |
| F7J1C8 | DAATVIPANSFSSFSTYWN   | Negative |
| F8QN53 | YKTGKSALLSYSDYGCYCGW  | Negative |
| F8QN53 | LIGVEGNLYQFGKMIRYKTG  | Negative |
| F8QN53 | NLYQFGKMIRYKTGKSALLS  | Negative |
| F8QN53 | FGKMIRYKTGKSALLSYSDY  | Negative |
| F8QN53 | EGNLYQFGKMIRYKTGKSAL  | Negative |

|        |                       |          |
|--------|-----------------------|----------|
| F8QN53 | GNLYQFGKMIRYKTGKSALL  | Negative |
| F8QN53 | MRILWIVAVCLIGVEGNLYQ  | Negative |
| F8QN53 | ILWIVAVCLIGVEGNLYQFG  | Negative |
| F8QN53 | GKSALLSYSDYGCYCGWGGQ  | Negative |
| F8QN53 | CLIGVEGNLYQFGKMIRYKT  | Negative |
| F8QN53 | KTGKSALLSYSDYGCYCGWG  | Negative |
| F8QN53 | AVCLIGVEGNLYQFGKMIRY  | Negative |
| F8QN53 | QFGKMIRYKTGKSALLSYSD  | Negative |
| F8QN53 | IGVEGNLYQFGKMIRYKTGK  | Negative |
| F8QN53 | MIRYKTGKSALLSYSDYGCY  | Negative |
| F8QN53 | LWIVAVCLIGVEGNLYQFGK  | Negative |
| F8QN53 | IVAVCLIGVEGNLYQFGKMI  | Negative |
| F8QN53 | TGKSALLSYSDYGCYCGWGG  | Negative |
| F8QN53 | VCLIGVEGNLYQFGKMIRYK  | Negative |
| F8QN53 | GVEGNLYQFGKMIRYKTGKS  | Negative |
| F8QN53 | WIVAVCLIGVEGNLYQFGKM  | Negative |
| F8QN53 | GKMIRYKTGKSALLSYSDYG  | Negative |
| F8QN53 | LYQFGKMIRYKTGKSALLSY  | Negative |
| F8QN53 | KMIRYKTGKSALLSYSDYGC  | Negative |
| F8QN53 | IRYKTGKSALLSYSDYGCYC  | Negative |
| F8QN53 | YQFGKMIRYKTGKSALLSYS  | Negative |
| F8QN53 | RYKTGKSALLSYSDYGCYCG  | Negative |
| F8QN53 | VAVCLIGVEGNLYQFGKMIR  | Negative |
| F8QN53 | VEGNLYQFGKMIRYKTGKSA  | Negative |
| F8S0Y4 | GSVDFDSESPRKPEIQNKIV  | Negative |
| F8S0Y4 | VLQQSSGSVDFDSESPRKPE  | Negative |
| F8S0Y4 | QSSGSVDFDSESPRKPEIQN  | Negative |
| F8S0Y4 | AAVLQQSSGSVDFDSESPRK  | Negative |
| F8S0Y4 | QQSSGSVDFDSESPRKPEIQ  | Negative |
| F8S0Y4 | FDSESPRKPEIQNKIVDLHN  | Negative |
| F8S0Y4 | LPILAAVLQQSSGSVDFDSE  | Negative |
| F8S0Y4 | VDFDSESPRKPEIQNKIVDL  | Negative |
| F8S0Y4 | MIAFIVLPILAAVLQQSSGS  | Negative |
| F8S0Y4 | LA AVLQQSSGSVDFDSESPR | Negative |
| F8S0Y4 | KPEIQNKIVDLHNSLRRSVN  | Negative |
| F8S0Y4 | RKPEIQNKIVDLHNSLRRSV  | Negative |
| F8S0Y4 | ESPRKPEIQNKIVDLHNSLR  | Negative |
| F8S0Y4 | SESPRKPEIQNKIVDLHNSL  | Negative |
| F8S0Y4 | PRKPEIQNKIVDLHNSLRRS  | Negative |
| F8S0Y4 | AVLQQSSGSVDFDSESPRKP  | Negative |
| F8S0Y4 | SVDFDSESPRKPEIQNKIVD  | Negative |
| F8S0Y4 | SPRKPEIQNKIVDLHNSLRR  | Negative |
| F8S0Y4 | FIVLPILAAVLQQSSGSVDF  | Negative |
| F8S0Y4 | ILAAVLQQSSGSVDFDSESP  | Negative |
| F8S0Y4 | DSESPRKPEIQNKIVDLHNS  | Negative |
| F8S0Y4 | DFDSESPRKPEIQNKIVDLH  | Negative |



|        |                       |          |
|--------|-----------------------|----------|
| F8S0Y4 | AFIVLPILAAVLQQSSGSVD  | Negative |
| F8S0Y4 | VLPIILAAVLQQSSGSVDFDS | Negative |
| F8S0Y4 | PILAAVLQQSSGSVDFDSES  | Negative |
| F8S0Y4 | SGSVDFDSESPRKPEIQNKI  | Negative |
| F8S0Y4 | IAFIVLPILAAVLQQSSGSV  | Negative |
| F8S0Y4 | LQQSSGSVDFDSESPRKPEI  | Negative |
| F8S0Y4 | SSGSVDFDSESPRKPEIQNK  | Negative |
| F8WQK8 | ADGGMWLMQQINGQVARMKS  | Negative |
| F8WQK8 | RFFPTLLLAFCSTLAYADG   | Negative |
| F8WQK8 | LLLAFCSTLAYADGGMWLM   | Negative |
| F8WQK8 | MQQINGQVARMKSLGMQLEA  | Negative |
| F8WQK8 | LLAFCSTLAYADGGMWLMQ   | Negative |
| F8WQK8 | DGGMWLMQQINGQVARMKSL  | Negative |
| F8WQK8 | TLAYADGGMWLMQQINGQVA  | Negative |
| F8WQK8 | FVCSTLAYADGGMWLMQQIN  | Negative |
| F8WQK8 | TLLLAFCSTLAYADGGMWL   | Negative |
| F8WQK8 | LMQQINGQVARMKSLGMQLE  | Negative |
| F8WQK8 | LAYADGGMWLMQQINGQVAR  | Negative |
| F8WQK8 | MWLMQQINGQVARMKSLGMQ  | Negative |
| F8WQK8 | STLAYADGGMWLMQQINGQV  | Negative |
| F8WQK8 | QINGQVARMKSLGMQLEAAD  | Negative |
| F8WQK8 | AYADGGMWLMQQINGQVARM  | Negative |
| F8WQK8 | GGMWLMQQINGQVARMKSLG  | Negative |
| F8WQK8 | FFPTLLLAFCSTLAYADGG   | Negative |
| F8WQK8 | CSTLAYADGGMWLMQQINGQ  | Negative |
| F8WQK8 | QQINGQVARMKSLGMQLEAA  | Negative |
| F8WQK8 | GMWLMQQINGQVARMKSLGM  | Negative |
| F8WQK8 | FPTLLLAFCSTLAYADGGM   | Negative |
| F8WQK8 | LAFVCSTLAYADGGMWLMQQ  | Negative |
| F8WQK8 | KRFFPTLLLAFCSTLAYAD   | Negative |
| F8WQK8 | YADGGMWLMQQINGQVARMK  | Negative |
| F8WQK8 | NKRFFPTLLLAFCSTLAYA   | Negative |
| F8WQK8 | VCSTLAYADGGMWLMQQING  | Negative |
| F8WQK8 | WLMQQINGQVARMKSLGMQL  | Negative |
| F8WQK8 | MNKRFFPTLLLAFCSTLAY   | Negative |
| F8WQK8 | AFVCSTLAYADGGMWLMQQI  | Negative |
| G3XDA8 | AVAAIDPALPEYQKASGVSG  | Negative |
| G3XDA8 | FVAAGVGAASAVAAIDPALP  | Negative |
| G3XDA8 | AAGVGAASAVAAIDPALPEY  | Negative |
| G3XDA8 | LMAALTFVAAGVGAASAVAA  | Negative |
| G3XDA8 | KLKRLMAALTFVAAGVGAAS  | Negative |
| G3XDA8 | PALPEYQKASGVSGNLSSVG  | Negative |
| G3XDA8 | MKLKRLMAALTFVAAGVGAA  | Negative |
| G3XDA8 | IDPALPEYQKASGVSGNLSS  | Negative |
| G3XDA8 | VAAGVGAASAVAAIDPALPE  | Negative |
| G3XDA8 | TFVAAGVGAASAVAAIDPAL  | Negative |

|        |                      |          |
|--------|----------------------|----------|
| G3XDA8 | RLMAALTFVAAGVGAASAVA | Negative |
| G3XDA8 | AGVGAASAVAAIDPALPEYQ | Negative |
| G3XDA8 | ASAVAAIDPALPEYQKASGV | Negative |
| G3XDA8 | AAIDPALPEYQKASGVSGNL | Negative |
| G3XDA8 | GAASAVAAIDPALPEYQKAS | Negative |
| G3XDA8 | VGAASAVAAIDPALPEYQKA | Negative |
| G3XDA8 | ALTFVAAGVGAASAVAAIDP | Negative |
| G3XDA8 | AALTFVAAGVGAASAVAAID | Negative |
| G3XDA8 | VAAIDPALPEYQKASGVSGN | Negative |
| G3XDA8 | LKRLMAALTFVAAGVGAASA | Negative |
| G3XDA8 | MAALTFVAAGVGAASAVAAI | Negative |
| G3XDA8 | KRLMAALTFVAAGVGAASAV | Negative |
| G3XDA8 | ALPEYQKASGVSGNLSSVGS | Negative |
| G3XDA8 | DPALPEYQKASGVSGNLSSV | Negative |
| G3XDA8 | SAVAAIDPALPEYQKASGV  | Negative |
| G3XDA8 | AIDPALPEYQKASGVSGNLS | Negative |
| G3XDA8 | AASAVAAIDPALPEYQKASG | Negative |
| G3XDA8 | GVGAASAVAAIDPALPEYQK | Negative |
| G3XDA8 | LPEYQKASGVSGNLSSVGS  | Negative |
| G4V4F9 | LFVFAVGIMLSMRASAFTCP | Negative |
| G4V4F9 | KTLFVFAVGIMLSMRASAFT | Negative |
| G4V4F9 | CRPELCGDPGYCEYGTTKDA | Negative |
| G4V4F9 | FTCPECRPELCGDPGYCEYG | Negative |
| G4V4F9 | AVGIMLSMRASAFTCPECRP | Negative |
| G4V4F9 | VGIMLSMRASAFTCPECRPE | Negative |
| G4V4F9 | MRASAFTCPECRPELCGDPG | Negative |
| G4V4F9 | CPECRPELCGDPGYCEYGTT | Negative |
| G4V4F9 | LSMRASAFTCPECRPELCGD | Negative |
| G4V4F9 | MLSMRASAFTCPECRPELCG | Negative |
| G4V4F9 | SAFTCPECRPELCGDPGYCE | Negative |
| G4V4F9 | ASAFTCPECRPELCGDPGYC | Negative |
| G4V4F9 | FAVGIMLSMRASAFTCPECR | Negative |
| G4V4F9 | ELCGDPGYCEYGTTKDADC  | Negative |
| G4V4F9 | PELCGDPGYCEYGTTKDADC | Negative |
| G4V4F9 | VFAVGIMLSMRASAFTCPEC | Negative |
| G4V4F9 | RPELCGDPGYCEYGTTKDAC | Negative |
| G4V4F9 | PECRPELCGDPGYCEYGTTK | Negative |
| G4V4F9 | CGDPGYCEYGTTKDACC    | Negative |
| G4V4F9 | ECRPELCGDPGYCEYGTTKD | Negative |
| G4V4F9 | RASAFTCPECRPELCGDPGY | Negative |
| G4V4F9 | MKTLFVFAVGIMLSMRASAF | Negative |
| G4V4F9 | GIMLSMRASAFTCPECRPEL | Negative |
| G4V4F9 | LCGDPGYCEYGTTKDACC   | Negative |
| G4V4F9 | SMRASAFTCPECRPELCGDP | Negative |
| G4V4F9 | TLFVFAVGIMLSMRASAFTC | Negative |
| G4V4F9 | IMLSMRASAFTCPECRPELC | Negative |

|        |                      |          |
|--------|----------------------|----------|
| G4V4F9 | AFTCPECRPELCGDPGYCEY | Negative |
| G4V4F9 | TCPECRPELCGDPGYCEYGT | Negative |
| G5EC68 | ATIVAADIDFSTCARMDVPI | Negative |
| G5EC68 | IVAADIDFSTCARMDVPILK | Negative |
| G5EC68 | IDFSTCARMDVPILKKAAQG | Negative |
| G5EC68 | MFVRSFLALLLATIVAADI  | Negative |
| G5EC68 | TIVAADIDFSTCARMDVPIL | Negative |
| G5EC68 | DFSTCARMDVPILKKAAQGL | Negative |
| G5EC68 | LALLLATIVAADIDFSTCAR | Negative |
| G5EC68 | TCARMDVPILKKAAQGLCIT | Negative |
| G5EC68 | ALLLATIVAADIDFSTCARM | Negative |
| G5EC68 | AADIDFSTCARMDVPILKKA | Negative |
| G5EC68 | STCARMDVPILKKAAQGLCI | Negative |
| G5EC68 | CARMDVPILKKAAQGLCITS | Negative |
| G5EC68 | ADIDFSTCARMDVPILKKA  | Negative |
| G5EC68 | ARMDVPILKKAAQGLCITSC | Negative |
| G5EC68 | LFLALLLATIVAADIDFSTC | Negative |
| G5EC68 | VPILKKAAQGLCITSCSMQN | Negative |
| G5EC68 | LLATIVAADIDFSTCARMDV | Negative |
| G5EC68 | FSTCARMDVPILKKAAQGLC | Negative |
| G5EC68 | DIDFSTCARMDVPILKKAAQ | Negative |
| G5EC68 | FLALLLATIVAADIDFSTCA | Negative |
| G5EC68 | SLFLALLLATIVAADIDFST | Negative |
| G5EC68 | MDVPILKKAAQGLCITSCSM | Negative |
| G5EC68 | FVRSFLALLLATIVAADID  | Negative |
| G5EC68 | VAADIDFSTCARMDVPILKK | Negative |
| G5EC68 | LLLATIVAADIDFSTCARMD | Negative |
| G5EC68 | LATIVAADIDFSTCARMDVP | Negative |
| G5EC68 | RSLFLALLLATIVAADIDFS | Negative |
| G5EC68 | RMDVPILKKAAQGLCITSCS | Negative |
| G5EC68 | DVPILKKAAQGLCITSCSMQ | Negative |
| G5ED35 | FLPFFIYSGNVLSKTSCLMA | Negative |
| G5ED35 | FFIYSGNVLSKTSCLMATGV | Negative |
| G5ED35 | VLKCPTDPEAVKKVHIDLWD | Negative |
| G5ED35 | KTSCLMATGVLCPTDPEAV  | Negative |
| G5ED35 | GVLKCPTDPEAVKKVHIDLW | Negative |
| G5ED35 | ATGVLCPTDPEAVKKVHID  | Negative |
| G5ED35 | CLMATGVLCPTDPEAVKKV  | Negative |
| G5ED35 | SGNVLSKTSCLMATGVLCPT | Negative |
| G5ED35 | TSCLMATGVLCPTDPEAVK  | Negative |
| G5ED35 | SCLMATGVLCPTDPEAVKK  | Negative |
| G5ED35 | GNVLSKTSCLMATGVLCPT  | Negative |
| G5ED35 | LIYFLPFFIYSGNVLSKTSC | Negative |
| G5ED35 | IYSGNVLSKTSCLMATGVLK | Negative |
| G5ED35 | FLIYFLPFFIYSGNVLSKTS | Negative |
| G5ED35 | RFLIYFLPFFIYSGNVLSKT | Negative |

|        |                      |          |
|--------|----------------------|----------|
| G5ED35 | SRFLIYFLPFFIYSGNVLSK | Negative |
| G5ED35 | TGVLKCPTDPEAVKKVHIDL | Negative |
| G5ED35 | NVLSKTSCLMATGVLKCPTD | Negative |
| G5ED35 | FIYSGNVLSKTSCLMATGVL | Negative |
| G5ED35 | VLSKTSCLMATGVLKCPTDP | Negative |
| G5ED35 | LMATGVLKCPTDPEAVKKVH | Negative |
| G5ED35 | SKTSCLMATGVLKCPTDPEA | Negative |
| G5ED35 | MATGVLKCPTDPEAVKKVHI | Negative |
| G5ED35 | LPFFIYSGNVLSKTSCLMAT | Negative |
| G5ED35 | LSKTSCLMATGVLKCPTDPE | Negative |
| G5ED35 | YSGNVLSKTSCLMATGVLKC | Negative |
| G5ED35 | PFFIYSGNVLSKTSCLMATG | Negative |
| G5ED35 | MSRFLIYFLPFFIYSGNVLS | Negative |
| G5ED35 | YFLPFFIYSGNVLSKTSCLM | Negative |
| G8XQX1 | MNVFFMFSLLFLATLGSCAD | Negative |
| G8XQX1 | NPLEECFREDDYEEFLEIAK | Negative |
| G8XQX1 | KNPLEECFREDDYEEFLEIA | Negative |
| G8XQX1 | GSCADDKNPLEECFREDDYE | Negative |
| G8XQX1 | FMFSLLFLATLGSCADDKNP | Negative |
| G8XQX1 | SLLFLATLGSCADDKNPLEE | Negative |
| G8XQX1 | ECFREDDYEEFLEIAKNGLK | Negative |
| G8XQX1 | MFSLLFLATLGSCADDKNPL | Negative |
| G8XQX1 | DDKNPLEECFREDDYEEFLE | Negative |
| G8XQX1 | CADDKNPLEECFREDDYEEF | Negative |
| G8XQX1 | CFREDDYEEFLEIAKNGLKK | Negative |
| G8XQX1 | TLGSCADDKNPLEECFREDD | Negative |
| G8XQX1 | PLEECFREDDYEEFLEIAKN | Negative |
| G8XQX1 | DKNPLEECFREDDYEEFLEI | Negative |
| G8XQX1 | LFLATLGSCADDKNPLEECF | Negative |
| G8XQX1 | SCADDKNPLEECFREDDYEE | Negative |
| G8XQX1 | REDDYEEFLEIAKNGLKKT  | Negative |
| G8XQX1 | VFFMFSLLFLATLGSCADDK | Negative |
| G8XQX1 | LLFLATLGSCADDKNPLEEC | Negative |
| G8XQX1 | ADDKNPLEECFREDDYEEFL | Negative |
| G8XQX1 | ATLGSCADDKNPLEECFRED | Negative |
| G8XQX1 | LGSCADDKNPLEECFREDDY | Negative |
| G8XQX1 | EECFREDDYEEFLEIAKNGL | Negative |
| G8XQX1 | LATLGSCADDKNPLEECFRE | Negative |
| G8XQX1 | FREDDYEEFLEIAKNGLKKT | Negative |
| G8XQX1 | NVFFMFSLLFLATLGSCADD | Negative |
| G8XQX1 | FLATLGSCADDKNPLEECFR | Negative |
| G8XQX1 | LEECFREDDYEEFLEIAKNG | Negative |
| G8XQX1 | FSLLFLATLGSCADDKNPLE | Negative |
| G8YYA5 | LLIGSDYCQAFLFSLIPHA  | Negative |
| G8YYA5 | LLTVFLVLLIGSDYCQAFLF | Negative |
| G8YYA5 | IPHAIGGLISAFKGRRKRD  | Negative |

|        |                      |          |
|--------|----------------------|----------|
| G8YYA5 | MEIKYLLTVFLVLLIGSDYC | Negative |
| G8YYA5 | LIPHAIGGLISAFKGRRKRD | Negative |
| G8YYA5 | PHAIGGLISAFKGRRKRDL  | Negative |
| G8YYA5 | CQAFSLIPHAIGGLISAF   | Negative |
| G8YYA5 | IKYLLTVFLVLLIGSDYCQA | Negative |
| G8YYA5 | IGSDYCQAFSLIPHAIGG   | Negative |
| G8YYA5 | EIKYLLTVFLVLLIGSDYCQ | Negative |
| G8YYA5 | SLIPHAIGGLISAFKGRRKR | Negative |
| G8YYA5 | VLLIGSDYCQAFSLIPHA   | Negative |
| G8YYA5 | DYCQAFSLIPHAIGGLIS   | Negative |
| G8YYA5 | VFLVLLIGSDYCQAFSLI   | Negative |
| G8YYA5 | FLSLIPHAIGGLISAFKGR  | Negative |
| G8YYA5 | FLVLLIGSDYCQAFSLIP   | Negative |
| G8YYA5 | LFSLIPHAIGGLISAFKGRR | Negative |
| G8YYA5 | FSLIPHAIGGLISAFKGRRK | Negative |
| G8YYA5 | LTVFLVLLIGSDYCQAFLS  | Negative |
| G8YYA5 | YCQAFSLIPHAIGGLISA   | Negative |
| G8YYA5 | HAIGGLISAFKGRRKRDL   | Negative |
| G8YYA5 | LIGSDYCQAFSLIPHAIG   | Negative |
| G8YYA5 | YLLTVFLVLLIGSDYCQAF  | Negative |
| G8YYA5 | KYLLTVFLVLLIGSDYCQAF | Negative |
| G8YYA5 | QAFSLIPHAIGGLISAFK   | Negative |
| G8YYA5 | GSDYCQAFSLIPHAIGGL   | Negative |
| G8YYA5 | SDYCQAFSLIPHAIGGLI   | Negative |
| G8YYA5 | LVLLIGSDYCQAFSLIPH   | Negative |
| G8YYA5 | AFLSLIPHAIGGLISAFKG  | Negative |
| G8YYA6 | PHAIGGLISAIKGRRKRDL  | Negative |
| G8YYA6 | LLIVSDHCQAFPFLIPHA   | Negative |
| G8YYA6 | LLTVFLVLLIVSDHCQAFP  | Negative |
| G8YYA6 | FSLIPHAIGGLISAIKGRRK | Negative |
| G8YYA6 | IKYLLTVFLVLLIVSDHCQA | Negative |
| G8YYA6 | VSDHCQAFPFLIPHAIGGL  | Negative |
| G8YYA6 | HCQAFPFLIPHAIGGLISA  | Negative |
| G8YYA6 | QAFPFLIPHAIGGLISAIK  | Negative |
| G8YYA6 | MEIKYLLTVFLVLLIVSDHC | Negative |
| G8YYA6 | HAIGGLISAIKGRRKRDL   | Negative |
| G8YYA6 | LIVSDHCQAFPFLIPHAIG  | Negative |
| G8YYA6 | PFLIPHAIGGLISAIKGRR  | Negative |
| G8YYA6 | IPHAIGGLISAIKGRRKRD  | Negative |
| G8YYA6 | KYLLTVFLVLLIVSDHCQAF | Negative |
| G8YYA6 | CQAFPFLIPHAIGGLISAI  | Negative |
| G8YYA6 | YLLTVFLVLLIVSDHCQAFP | Negative |
| G8YYA6 | FLVLLIVSDHCQAFPFLIP  | Negative |
| G8YYA6 | VFLVLLIVSDHCQAFPFLI  | Negative |
| G8YYA6 | EIKYLLTVFLVLLIVSDHCQ | Negative |
| G8YYA6 | LIPHAIGGLISAIKGRRKRD | Negative |

|        |                      |          |
|--------|----------------------|----------|
| G8YYA6 | LVLLIVSDHCQAFPFSLIPH | Negative |
| G8YYA6 | SDHCQAFPFSLIPHAIGGLI | Negative |
| G8YYA6 | VLLIVSDHCQAFPFSLIPHA | Negative |
| G8YYA6 | LTVFLVLLIVSDHCQAFPFS | Negative |
| G8YYA6 | SLIPHAIGGLISAIKGRRKR | Negative |
| G8YYA6 | AFPFSLIPHAIGGLISAIKG | Negative |
| G8YYA6 | FPFSLIPHAIGGLISAIKGR | Negative |
| G8YYA6 | DHCQAFPFSLIPHAIGGLIS | Negative |
| G8YYA6 | IVSDHCQAFPFSLIPHAIGG | Negative |
| G9I930 | IPPQALNLNQFRLMIKCTND | Negative |
| G9I930 | SIPPQALNLNQFRLMIKCTN | Negative |
| G9I930 | LGASSIPPQALNLNQFRLMI | Negative |
| G9I930 | PAHLLVLAAVCVSLLGASSI | Negative |
| G9I930 | LLVLAAVCVSLLGASSIPPQ | Negative |
| G9I930 | LLGASSIPPQALNLNQFRLM | Negative |
| G9I930 | LVLAAVCVSLLGASSIPPQA | Negative |
| G9I930 | GASSIPPQALNLNQFRLMIK | Negative |
| G9I930 | KMNPAHLLVLAAVCVSLLGA | Negative |
| G9I930 | AHLLVLAAVCVSLLGASSIP | Negative |
| G9I930 | AVCVSLLGASSIPPQALNLN | Negative |
| G9I930 | HLLVLAAVCVSLLGASSIPP | Negative |
| G9I930 | PPQALNLNQFRLMIKCTNDR | Negative |
| G9I930 | ALNLNQFRLMIKCTNDRVWA | Negative |
| G9I930 | DKMNPAHLLVLAAVCVSLLG | Negative |
| G9I930 | VCVSLLGASSIPPQALNLNQ | Negative |
| G9I930 | VLAAVCVSLLGASSIPPQAL | Negative |
| G9I930 | PQALNLNQFRLMIKCTNDRV | Negative |
| G9I930 | LNLNQFRLMIKCTNDRVWAD | Negative |
| G9I930 | NPAHLLVLAAVCVSLLGASS | Negative |
| G9I930 | LAAVCVSLLGASSIPPQALN | Negative |
| G9I930 | MDKMNPAHLLVLAAVCVSLL | Negative |
| G9I930 | VSLLGASSIPPQALNLNQFR | Negative |
| G9I930 | ASSIPPQALNLNQFRLMIKC | Negative |
| G9I930 | AAVCVSLLGASSIPPQALNL | Negative |
| G9I930 | SLLGASSIPPQALNLNQFRL | Negative |
| G9I930 | QALNLNQFRLMIKCTNDRVW | Negative |
| G9I930 | SSIPPQALNLNQFRLMIKCT | Negative |
| G9I930 | MNPAHLLVLAAVCVSLLGAS | Negative |
| G9M8X1 | SDTVPAEVQTIVKTPGHQYD | Negative |
| G9M8X1 | MMRAIYLLVVVCWAAAANAS | Negative |
| G9M8X1 | AANASSDTVPAEVQTIVKTP | Negative |
| G9M8X1 | YLLVVVCWAAAANASSDTVP | Negative |
| G9M8X1 | AAANASSDTVPAEVQTIVKT | Negative |
| G9M8X1 | AAAANASSDTVPAEVQTIVK | Negative |
| G9M8X1 | ASSDTVPAEVQTIVKTPGHQ | Negative |
| G9M8X1 | QTIVKTPGHQYDLYKKMVAT | Negative |

|        |                      |          |
|--------|----------------------|----------|
| G9M8X1 | RAIYLLVVVCWAAAANASSD | Negative |
| G9M8X1 | EVQTIVKTPGHQYDLYKKMV | Negative |
| G9M8X1 | LLVVVCWAAAANASSDTVPA | Negative |
| G9M8X1 | TIVKTPGHQYDLYKKMVATI | Negative |
| G9M8X1 | SSDTVPAEVQTIVKTPGHQY | Negative |
| G9M8X1 | TVPAEVQTIVKTPGHQYDLY | Negative |
| G9M8X1 | PAEVQTIVKTPGHQYDLYKK | Negative |
| G9M8X1 | VQTIVKTPGHQYDLYKKMVA | Negative |
| G9M8X1 | ANASSDTVPAEVQTIVKTPG | Negative |
| G9M8X1 | MRAIYLLVVVCWAAAANASS | Negative |
| G9M8X1 | WAAAANASSDTVPAEVQTIV | Negative |
| G9M8X1 | VPAEVQTIVKTPGHQYDLYK | Negative |
| G9M8X1 | AEVQTIVKTPGHQYDLYKKM | Negative |
| G9M8X1 | VVCWAAAANASSDTVPAEVQ | Negative |
| G9M8X1 | LVVVCWAAAANASSDTVPAE | Negative |
| G9M8X1 | DTVPAEVQTIVKTPGHQYDL | Negative |
| G9M8X1 | AIYLLVVVCWAAAANASSDT | Negative |
| G9M8X1 | CWAAAANASSDTVPAEVQTI | Negative |
| G9M8X1 | VCWAAAANASSDTVPAEVQT | Negative |
| G9M8X1 | VVVCWAAAANASSDTVPAEV | Negative |
| G9M8X1 | NASSDTVPAEVQTIVKTPGH | Negative |
| I0J1I6 | PFSRTLLALSLGMALLQNPA | Negative |
| I0J1I6 | MTDGVAQVNTQDSNAWVEIN | Negative |
| I0J1I6 | LALSLGMALLQNPAFAAPPL | Negative |
| I0J1I6 | QNPAFAAPPLSMTDGVAQVN | Negative |
| I0J1I6 | MALLQNPAFAAPPLSMTDGV | Negative |
| I0J1I6 | PLSMTDGVAQVNTQDSNAWV | Negative |
| I0J1I6 | PPLSMTDGVAQVNTQDSNAW | Negative |
| I0J1I6 | LSMTDGVAQVNTQDSNAWVE | Negative |
| I0J1I6 | MPFSRTLLALSLGMALLQNP | Negative |
| I0J1I6 | RTLLALSLGMALLQNPAFAA | Negative |
| I0J1I6 | APPLSMTDGVAQVNTQDSNA | Negative |
| I0J1I6 | PAFAAPPLSMTDGVAQVNTQ | Negative |
| I0J1I6 | TLLALSLGMALLQNPAFAAP | Negative |
| I0J1I6 | LLALSLGMALLQNPAFAAPP | Negative |
| I0J1I6 | LSLGMALLQNPAFAAPPLSM | Negative |
| I0J1I6 | ALLQNPAFAAPPLSMTDGVA | Negative |
| I0J1I6 | AAPPLSMTDGVAQVNTQDSN | Negative |
| I0J1I6 | AFAAPPLSMTDGVAQVNTQD | Negative |
| I0J1I6 | SLGMALLQNPAFAAPPLSMT | Negative |
| I0J1I6 | FSRTLLALSLGMALLQNPAF | Negative |
| I0J1I6 | NPAFAAPPLSMTDGVAQVNT | Negative |
| I0J1I6 | SMTDGVAQVNTQDSNAWVEI | Negative |
| I0J1I6 | TDGVAQVNTQDSNAWVEINK | Negative |
| I0J1I6 | LLQNPAFAAPPLSMTDGVAQ | Negative |
| I0J1I6 | SRTLLALSLGMALLQNPAFA | Negative |

|        |                       |          |
|--------|-----------------------|----------|
| I0J1I6 | LGMALLQNPAFAAPPLSMTD  | Negative |
| I0J1I6 | FAAPPLSMTDGV AQVNTQDS | Negative |
| I0J1I6 | GMALLQNPAFAAPPLSMTDG  | Negative |
| I0J1I6 | LQNPAFAAPPLSMTDGV AQV | Negative |
| I2C090 | PGVLRDTEEQILVEAHGDN   | Negative |
| I2C090 | ALLIGFPGSSHGALYTLITP  | Negative |
| I2C090 | ITPGVLRDTEEQILVEAHG   | Negative |
| I2C090 | MEGMALYLVAALLIGFPGSS  | Negative |
| I2C090 | TLITPGVLRDTEEQILVEA   | Negative |
| I2C090 | LITPGVLRDTEEQILVEAH   | Negative |
| I2C090 | EGMALYLVAALLIGFPGSSH  | Negative |
| I2C090 | ALYTLITPGVLRDTEEQIL   | Negative |
| I2C090 | HGALYTLITPGVLRDTEEQ   | Negative |
| I2C090 | SHGALYTLITPGVLRDTEE   | Negative |
| I2C090 | IGFPGSSHGALYTLITPGVL  | Negative |
| I2C090 | AALLIGFPGSSHGALYTLIT  | Negative |
| I2C090 | MALYLVAALLIGFPGSSHGA  | Negative |
| I2C090 | LYLVAALLIGFPGSSHGALY  | Negative |
| I2C090 | VAALLIGFPGSSHGALYTLI  | Negative |
| I2C090 | GALYTLITPGVLRDTEEQI   | Negative |
| I2C090 | GMALYLVAALLIGFPGSSHG  | Negative |
| I2C090 | LIGFPGSSHGALYTLITPGV  | Negative |
| I2C090 | PGSSHGALYTLITPGVLRD   | Negative |
| I2C090 | LYTLITPGVLRDTEEQILV   | Negative |
| I2C090 | LLIGFPGSSHGALYTLITPG  | Negative |
| I2C090 | YLVAALLIGFPGSSHGALYT  | Negative |
| I2C090 | GSSHGALYTLITPGVLRD    | Negative |
| I2C090 | ALYLVAALLIGFPGSSHGAL  | Negative |
| I2C090 | TPGVLRDTEEQILVEAHGD   | Negative |
| I2C090 | SSHGALYTLITPGVLRDTE   | Negative |
| I2C090 | GFPGSSHGALYTLITPGVLR  | Negative |
| I2C090 | FPGSSHGALYTLITPGVLR   | Negative |
| I2C090 | YTLITPGVLRDTEEQILVE   | Negative |
| I6RA76 | LAIDNVTTICPPGCICNRQS  | Negative |
| I6RA76 | LFFTLFLLAL AIDNVTTICP | Negative |
| I6RA76 | PGCICNRQSVGLTCKPSPGS  | Negative |
| I6RA76 | LFLLAL AIDNVTTICPPGCI | Negative |
| I6RA76 | SKFAVLFFTLFLLAL AIDNV | Negative |
| I6RA76 | FTLFLLAL AIDNVTTICPPG | Negative |
| I6RA76 | TICPPGCICNRQSVGLTCKP  | Negative |
| I6RA76 | NVTTICPPGCICNRQSVGLT  | Negative |
| I6RA76 | GCICNRQSVGLTCKPSPGSD  | Negative |
| I6RA76 | FLAL AIDNVTTICPPGCIC  | Negative |
| I6RA76 | TTICPPGCICNRQSVGLTCK  | Negative |
| I6RA76 | CICNRQSVGLTCKPSPGSDM  | Negative |
| I6RA76 | AIDNVTTICPPGCICNRQSV  | Negative |



|        |                      |          |
|--------|----------------------|----------|
| I6RA76 | LLALAIDNVTTCPPGCICN  | Negative |
| I6RA76 | FAVLFFTLFLLALAIDNVTT | Negative |
| I6RA76 | VLFFTLFLLALAIDNVTTIC | Negative |
| I6RA76 | AVLFFTLFLLALAIDNVTTI | Negative |
| I6RA76 | PPGCICNRQSVGLTCKPSPG | Negative |
| I6RA76 | CPPGCICNRQSVGLTCKPSP | Negative |
| I6RA76 | ICPPGCICNRQSVGLTCKPS | Negative |
| I6RA76 | DNVTTCPPGCICNRQSVGL  | Negative |
| I6RA76 | KSKFAVLFFTLFLLALAIDN | Negative |
| I6RA76 | MKSKFAVLFFTLFLLALAID | Negative |
| I6RA76 | TLFLLALAIDNVTTICPPGC | Negative |
| I6RA76 | IDNVTTICPPGCICNRQSVG | Negative |
| I6RA76 | VTTCPPGCICNRQSVGLTC  | Negative |
| I6RA76 | FFTLFLLALAIDNVTTICPP | Negative |
| I6RA76 | ALAIDNVTTICPPGCICNRQ | Negative |
| I6RA76 | LALAIDNVTTICPPGCICNR | Negative |
| I6RU32 | IMFSLDKSYSTDDESGNKCA | Negative |
| I6RU32 | DESGNKCAKTKRRENVCRVC | Negative |
| I6RU32 | SYSTDDESGNKCAKTKRREN | Negative |
| I6RU32 | VMALIMFSLDKSYSTDDESG | Negative |
| I6RU32 | FSLDKSYSTDDESGNKCAKT | Negative |
| I6RU32 | DKSYSTDDESGNKCAKTKRR | Negative |
| I6RU32 | SGNKCAKTKRRENVCRVCGN | Negative |
| I6RU32 | SLDKSYSTDDESGNKCAKTK | Negative |
| I6RU32 | TDDESGNKCAKTKRRENVCR | Negative |
| I6RU32 | SIAILLVMALIMFSLDKSYS | Negative |
| I6RU32 | AILLVMALIMFSLDKSYSTD | Negative |
| I6RU32 | LLVMALIMFSLDKSYSTDDE | Negative |
| I6RU32 | KSYSTDDESGNKCAKTKRRE | Negative |
| I6RU32 | LDKSYSTDDESGNKCAKTKR | Negative |
| I6RU32 | ILLVMALIMFSLDKSYSTD  | Negative |
| I6RU32 | NSSIAILLVMALIMFSLDKS | Negative |
| I6RU32 | NKCAKTKRRENVCRVCGNRS | Negative |
| I6RU32 | ESGNKCAKTKRRENVCRVCG | Negative |
| I6RU32 | LIMFSLDKSYSTDDESGNKC | Negative |
| I6RU32 | MFSLDKSYSTDDESGNKCAK | Negative |
| I6RU32 | STDDESGNKCAKTKRRENV  | Negative |
| I6RU32 | DDESGNKCAKTKRRENVCRV | Negative |
| I6RU32 | MALIMFSLDKSYSTDDESGN | Negative |
| I6RU32 | IAILLVMALIMFSLDKSYST | Negative |
| I6RU32 | YSTDDESGNKCAKTKRRENV | Negative |
| I6RU32 | GNKCAKTKRRENVCRVCGNR | Negative |
| I6RU32 | MNSSIAILLVMALIMFSLDK | Negative |
| I6RU32 | SSIAILLVMALIMFSLDKSY | Negative |
| I6RU32 | ALIMFSLDKSYSTDDESGNK | Negative |
| I6S390 | LENVEYRLSCIPKGGECEM  | Negative |

|        |                      |          |
|--------|----------------------|----------|
| I6S390 | CMNTDVIQAEESQHDTLENV | Negative |
| I6S390 | IYALIFAIVVCMNTDVIQAE | Negative |
| I6S390 | MNTDVIQAEESQHDTLENVE | Negative |
| I6S390 | SQHDTLENVEYRLSCIPKGG | Negative |
| I6S390 | IVVCMNTDVIQAEESQHDTL | Negative |
| I6S390 | QHDTLENVEYRLSCIPKGGE | Negative |
| I6S390 | VIQAEESQHDTLENVEYRLS | Negative |
| I6S390 | MAYIYALIFAIVVCMNTDVI | Negative |
| I6S390 | AIVVCMNTDVIQAEESQHDT | Negative |
| I6S390 | DTLENVEYRLSCIPKGGECE | Negative |
| I6S390 | VVCMNTDVIQAEESQHDTLE | Negative |
| I6S390 | QAEESQHDTLENVEYRLSCI | Negative |
| I6S390 | TLENVEYRLSCIPKGGECE  | Negative |
| I6S390 | ESQHDTLENVEYRLSCIPKG | Negative |
| I6S390 | IQAEESQHDTLENVEYRLSC | Negative |
| I6S390 | YALIFAIVVCMNTDVIQAE  | Negative |
| I6S390 | HDTLENVEYRLSCIPKGGE  | Negative |
| I6S390 | NTDVIQAEESQHDTLENVEY | Negative |
| I6S390 | DVIQAEESQHDTLENVEYRL | Negative |
| I6S390 | AEESQHDTLENVEYRLSCIP | Negative |
| I6S390 | YIYALIFAIVVCMNTDVIQA | Negative |
| I6S390 | TDVIQAEESQHDTLENVEYR | Negative |
| I6S390 | LIFAIVVCMNTDVIQAEESQ | Negative |
| I6S390 | FAIVVCMNTDVIQAEESQHD | Negative |
| I6S390 | EESQHDTLENVEYRLSCIPK | Negative |
| I6S390 | ALIFAIVVCMNTDVIQAEES | Negative |
| I6S390 | VCMNTDVIQAEESQHDTLEN | Negative |
| I6S390 | AYIYALIFAIVVCMNTDVIQ | Negative |
| I6S7G5 | CSNDQLHVTIYSIFSPLFDK | Negative |
| I6S7G5 | LAIKEVIAIDGLEICSNDQL | Negative |
| I6S7G5 | DGLEICSNDQLHVTIYSIFS | Negative |
| I6S7G5 | FTLAIKEVIAIDGLEICSND | Negative |
| I6S7G5 | YSFIVFTLAIKEVIAIDGLE | Negative |
| I6S7G5 | VFTLAIKEVIAIDGLEICSN | Negative |
| I6S7G5 | LEICSNDQLHVTIYSIFSPL | Negative |
| I6S7G5 | IVFTLAIKEVIAIDGLEICS | Negative |
| I6S7G5 | MFYSFIVFTLAIKEVIAIDG | Negative |
| I6S7G5 | NDQLHVTIYSIFSPLFDKPK | Negative |
| I6S7G5 | DQLHVTIYSIFSPLFDKPKL | Negative |
| I6S7G5 | GLEICSNDQLHVTIYSIFS  | Negative |
| I6S7G5 | IAIDGLEICSNDQLHVTIYS | Negative |
| I6S7G5 | VIAIDGLEICSNDQLHVTIY | Negative |
| I6S7G5 | MSWMFYFIVFTLAIKEVIA  | Negative |
| I6S7G5 | TLAIKEVIAIDGLEICSNDQ | Negative |
| I6S7G5 | EICSNDQLHVTIYSIFSPLF | Negative |
| I6S7G5 | AIDGLEICSNDQLHVTIYSI | Negative |

|        |                       |          |
|--------|-----------------------|----------|
| I6S7G5 | FIVFTLAIKEVIAIDGLEIC  | Negative |
| I6S7G5 | FYSFIVFTLAIKEVIAIDGL  | Negative |
| I6S7G5 | ICSNDQLHVTIYSIFSPLFD  | Negative |
| I6S7G5 | SNDQLHVTIYSIFSPLFDKP  | Negative |
| I6S7G5 | KEVIAIDGLEICSNDQLHVT  | Negative |
| I6S7G5 | EVIAIDGLEICSNDQLHVTI  | Negative |
| I6S7G5 | IDGLEICSNDQLHVTIYSIF  | Negative |
| I6S7G5 | SFIVFTLAIKEVIAIDGLEI  | Negative |
| I6S7G5 | AIKEVIAIDGLEICSNDQLH  | Negative |
| I6S7G5 | IKEVIAIDGLEICSNDQLHV  | Negative |
| I6S7G5 | WMFYSFIVFTLAIKEVIAID  | Negative |
| I6S7I0 | VLAIDNVTTQCLEGCECNQE  | Negative |
| I6S7I0 | AIDNVTTQCLEGCECNQEST  | Negative |
| I6S7I0 | TTQCLEGCECNQESTGKTCR  | Negative |
| I6S7I0 | VTTQCLEGCECNQESTGKTC  | Negative |
| I6S7I0 | TQCLEGCECNQESTGKTCRP  | Negative |
| I6S7I0 | GCECNQESTGKTCRPKQGSN  | Negative |
| I6S7I0 | CECNQESTGKTCRPKQGSNV  | Negative |
| I6S7I0 | LEGCECNQESTGKTCRPKQG  | Negative |
| I6S7I0 | LFVLVLAIDNVTTQCLEGCE  | Negative |
| I6S7I0 | TLFVLVLAIDNVTTQCLEGCE | Negative |
| I6S7I0 | NVTTQCLEGCECNQESTGKT  | Negative |
| I6S7I0 | QCLEGCECNQESTGKTCRPK  | Negative |
| I6S7I0 | FVLVLAIDNVTTQCLEGCEC  | Negative |
| I6S7I0 | VITLFVLVLAIDNVTTQCLE  | Negative |
| I6S7I0 | LAIDNVTTQCLEGCECNQES  | Negative |
| I6S7I0 | VLVLAIDNVTTQCLEGCECN  | Negative |
| I6S7I0 | IDNVTTQCLEGCECNQESTG  | Negative |
| I6S7I0 | CLEGCECNQESTGKTCRPKQ  | Negative |
| I6S7I0 | LVITLFVLVLAIDNVTTQCL  | Negative |
| I6S7I0 | KNKFAALVITLFVLVLAIDN  | Negative |
| I6S7I0 | FAALVITLFVLVLAIDNVTT  | Negative |
| I6S7I0 | AALVITLFVLVLAIDNVTTQ  | Negative |
| I6S7I0 | EGCECNQESTGKTCRPKQGS  | Negative |
| I6S7I0 | MKNKFAALVITLFVLVLAID  | Negative |
| I6S7I0 | ITLFVLVLAIDNVTTQCLEG  | Negative |
| I6S7I0 | ALVITLFVLVLAIDNVTTQC  | Negative |
| I6S7I0 | LVLVAIDNVTTQCLEGCECNQ | Negative |
| I6S7I0 | DNVTTQCLEGCECNQESTGK  | Negative |
| I6S7I0 | NKFAALVITLFVLVLAIDNV  | Negative |
| I7ICN3 | ADQGCLPDWTLYEGYCYKVF  | Negative |
| I7ICN3 | FLSSGLLVVFLSLSGTGADQ  | Negative |
| I7ICN3 | LPDWTLYEGYCYKVFKEKKT  | Negative |
| I7ICN3 | IFLSSGLLVVFLSLSGTGAD  | Negative |
| I7ICN3 | SSGLLVVFLSLSGTGADQGC  | Negative |
| I7ICN3 | QGCLPDWTLYEGYCYKVFKE  | Negative |

|        |                      |          |
|--------|----------------------|----------|
| I7ICN3 | FIFLSSGLLVVFLSLSGTGA | Negative |
| I7ICN3 | PDWTLYEGYCYKVFKEKKTW | Negative |
| I7ICN3 | GRFIFLSSGLLVVFLSLSGT | Negative |
| I7ICN3 | VVFLSLSGTGADQGCLPDWT | Negative |
| I7ICN3 | LSSGLLVVFLSLSGTGADQG | Negative |
| I7ICN3 | GCLPDWTLYEGYCYKVFKEK | Negative |
| I7ICN3 | LSLSGTGADQGCLPDWTLYE | Negative |
| I7ICN3 | MGRFIFLSSGLLVVFLSLSG | Negative |
| I7ICN3 | GTGADQGCLPDWTLYEGYCY | Negative |
| I7ICN3 | LLVVFLSLSGTGADQGCLPD | Negative |
| I7ICN3 | TGADQGCLPDWTLYEGYCYK | Negative |
| I7ICN3 | VFLSLSGTGADQGCLPDWTL | Negative |
| I7ICN3 | RFIFLSSGLLVVFLSLSGTG | Negative |
| I7ICN3 | SLSGTGADQGCLPDWTLYEG | Negative |
| I7ICN3 | LVVFLSLSGTGADQGCLPDW | Negative |
| I7ICN3 | DQGCLPDWTLYEGYCYKVFK | Negative |
| I7ICN3 | GLLVVFLSLSGTGADQGCLP | Negative |
| I7ICN3 | FLSLSGTGADQGCLPDWTLY | Negative |
| I7ICN3 | SGTGADQGCLPDWTLYEGYC | Negative |
| I7ICN3 | GADQGCLPDWTLYEGYCYKV | Negative |
| I7ICN3 | CLPDWTLYEGYCYKVFKEKK | Negative |
| I7ICN3 | LSGTGADQGCLPDWTLYEGY | Negative |
| I7ICN3 | DWTLYEGYCYKVFKEKKTWA | Negative |
| I7JUQ0 | GRFIFLSSGWLVVFLSLSGT | Negative |
| I7JUQ0 | CLPGWSLYEGHCYKFFFIFK | Negative |
| I7JUQ0 | LSLSGTGADEGCLPGWSLYE | Negative |
| I7JUQ0 | IFLSSGWLVVFLSLSGTGAD | Negative |
| I7JUQ0 | EGCLPGWSLYEGHCYKFFFI | Negative |
| I7JUQ0 | SGTGADEGCLPGWSLYEGHC | Negative |
| I7JUQ0 | LSGTGADEGCLPGWSLYEGH | Negative |
| I7JUQ0 | WLVVFLSLSGTGADEGCLPG | Negative |
| I7JUQ0 | GCLPGWSLYEGHCYKFFFIF | Negative |
| I7JUQ0 | ADEGCLPGWSLYEGHCYKFF | Negative |
| I7JUQ0 | SLSGTGADEGCLPGWSLYEG | Negative |
| I7JUQ0 | GWLVVFLSLSGTGADEGCLP | Negative |
| I7JUQ0 | GWSLYEGHCYKFFFIFKTWE | Negative |
| I7JUQ0 | GTGADEGCLPGWSLYEGHCY | Negative |
| I7JUQ0 | LSSGWLVVFLSLSGTGADEG | Negative |
| I7JUQ0 | SSGWLVVFLSLSGTGADEGC | Negative |
| I7JUQ0 | LVVFLSLSGTGADEGCLPGW | Negative |
| I7JUQ0 | VFLSLSGTGADEGCLPGWSL | Negative |
| I7JUQ0 | MGRFIFLSSGWLVVFLSLSG | Negative |
| I7JUQ0 | VVFLSLSGTGADEGCLPGWS | Negative |
| I7JUQ0 | DEGCLPGWSLYEGHCYKFFF | Negative |
| I7JUQ0 | TGADEGCLPGWSLYEGHCYK | Negative |
| I7JUQ0 | RFIFLSSGWLVVFLSLSGTG | Negative |

|        |                       |          |
|--------|-----------------------|----------|
| I7JUQ0 | FLSLSGTGADEGCLPGWSLY  | Negative |
| I7JUQ0 | FIFLSSGWL VVFLSLSGTGA | Negative |
| I7JUQ0 | LPGWSLYEGHCYKFFIFKT   | Negative |
| I7JUQ0 | GADEGCLPGWSLYEGHCYKF  | Negative |
| I7JUQ0 | PGWSLYEGHCYKFFIFKTW   | Negative |
| I7JUQ0 | FLSSGWL VVFLSLSGTGADE | Negative |
| J7H670 | LLFLAALGSCADDRNPLGEC  | Negative |
| J7H670 | AALGSCADDRNPLGECFRET  | Negative |
| J7H670 | GECFRETDYEEFLEIAKNGL  | Negative |
| J7H670 | LGSCADDRNPLGECFRETDY  | Negative |
| J7H670 | FRETDYEEFLEIAKNGLRAT  | Negative |
| J7H670 | MNVFFMFSLLFLAALGSCAD  | Negative |
| J7H670 | GSCADDRNPLGECFRETDYE  | Negative |
| J7H670 | FLAALGSCADDRNPLGECFR  | Negative |
| J7H670 | FSLFLAALGSCADDRNPLG   | Negative |
| J7H670 | DRNPLGECFRETDYEEFLEI  | Negative |
| J7H670 | SCADDRNPLGECFRETDYEE  | Negative |
| J7H670 | CADDRNPLGECFRETDYEEF  | Negative |
| J7H670 | ALGSCADDRNPLGECFRETD  | Negative |
| J7H670 | CFRETDYEEFLEIAKNGLRA  | Negative |
| J7H670 | DDRNPLGECFRETDYEEFLE  | Negative |
| J7H670 | LFLAALGSCADDRNPLGECF  | Negative |
| J7H670 | PLGECFRETDYEEFLEIAKN  | Negative |
| J7H670 | NVFFMFSLLFLAALGSCADD  | Negative |
| J7H670 | RETDYEEFLEIAKNGLRATS  | Negative |
| J7H670 | RNPLGECFRETDYEEFLEIA  | Negative |
| J7H670 | MFSLLFLAALGSCADDRNPL  | Negative |
| J7H670 | FMFSLLFLAALGSCADDRNP  | Negative |
| J7H670 | NPLGECFRETDYEEFLEIAK  | Negative |
| J7H670 | VFFMFSLLFLAALGSCADDR  | Negative |
| J7H670 | LGECFRETDYEEFLEIAKNG  | Negative |
| J7H670 | ECFRETDYEEFLEIAKNGLR  | Negative |
| J7H670 | SLLFLAALGSCADDRNPLGE  | Negative |
| J7H670 | ADDRNPLGECFRETDYEEFL  | Negative |
| J7H670 | LAALGSCADDRNPLGECFRE  | Negative |
| K4LAH1 | AMAEINGGGATLPQQLYQEP  | Negative |
| K4LAH1 | SLSVAALVSAQAMAEINGGG  | Negative |
| K4LAH1 | YKRSLIAASLSVAALVSAQA  | Negative |
| K4LAH1 | MYKRSLIAASLSVAALVSAQ  | Negative |
| K4LAH1 | INGGGATLPQQLYQEPGVL   | Negative |
| K4LAH1 | ATLPQQLYQEPGVLTAGFAA  | Negative |
| K4LAH1 | AQAMAEINGGGATLPQQLYQ  | Negative |
| K4LAH1 | MAEINGGGATLPQQLYQEPG  | Negative |
| K4LAH1 | VAALVSAQAMAEINGGGATL  | Negative |
| K4LAH1 | VSAQAMAEINGGGATLPQQL  | Negative |
| K4LAH1 | GATLPQQLYQEPGVLTAGFA  | Negative |

|        |                      |          |
|--------|----------------------|----------|
| K4LAH1 | GGATLPQQLYQEPGVLTAGF | Negative |
| K4LAH1 | LSVAALVSAQAMAEINGGGA | Negative |
| K4LAH1 | KRSLIAASLSVAALVSAQAM | Negative |
| K4LAH1 | AEINGGGATLPQQLYQEPGV | Negative |
| K4LAH1 | SLIAASLSVAALVSAQAMAE | Negative |
| K4LAH1 | QAMAEINGGGATLPQQLYQE | Negative |
| K4LAH1 | ALVSAQAMAEINGGGATLPQ | Negative |
| K4LAH1 | IAASLSVAALVSAQAMAEIN | Negative |
| K4LAH1 | SVAALVSAQAMAEINGGGAT | Negative |
| K4LAH1 | AASLSVAALVSAQAMAEING | Negative |
| K4LAH1 | EINGGGATLPQQLYQEPGV  | Negative |
| K4LAH1 | LIAASLSVAALVSAQAMAEI | Negative |
| K4LAH1 | SAQAMAEINGGGATLPQQLY | Negative |
| K4LAH1 | AALVSAQAMAEINGGGATLP | Negative |
| K4LAH1 | GGGATLPQQLYQEPGVLTAG | Negative |
| K4LAH1 | LVSAQAMAEINGGGATLPQQ | Negative |
| K4LAH1 | NGGGATLPQQLYQEPGVLT  | Negative |
| K4LAH1 | RSLIAASLSVAALVSAQAMA | Negative |
| K7XWG4 | ESIGIEVLHETICVSLRTQR | Negative |
| K7XWG4 | ALCCVAIWVVESIGIEVLHE | Negative |
| K7XWG4 | WVVESIGIEVLHETICVSLR | Negative |
| K7XWG4 | RLLTILALCCVAIWVVESIG | Negative |
| K7XWG4 | TICVSLRTQRIPIQKIKTYT | Negative |
| K7XWG4 | HETICVSLRTQRIPIQKIKT | Negative |
| K7XWG4 | LLTILALCCVAIWVVESIGI | Negative |
| K7XWG4 | VESIGIEVLHETICVSLRTQ | Negative |
| K7XWG4 | LCCVAIWVVESIGIEVLHET | Negative |
| K7XWG4 | CVSLRTQRIPIQKIKTYTIK | Negative |
| K7XWG4 | VAIWVVESIGIEVLHETICV | Negative |
| K7XWG4 | CVAIWVVESIGIEVLHETIC | Negative |
| K7XWG4 | VVESIGIEVLHETICVSLRT | Negative |
| K7XWG4 | AIWVVESIGIEVLHETICVS | Negative |
| K7XWG4 | IEVLHETICVSLRTQRIPIQ | Negative |
| K7XWG4 | VLHETICVSLRTQRIPIQKI | Negative |
| K7XWG4 | ICVSLRTQRIPIQKIKTYTI | Negative |
| K7XWG4 | LTILALCCVAIWVVESIGIE | Negative |
| K7XWG4 | ILALCCVAIWVVESIGIEVL | Negative |
| K7XWG4 | GIEVLHETICVSLRTQRIPI | Negative |
| K7XWG4 | IGIEVLHETICVSLRTQRIP | Negative |
| K7XWG4 | IWVVESIGIEVLHETICVSL | Negative |
| K7XWG4 | CCVAIWVVESIGIEVLHETI | Negative |
| K7XWG4 | MRLLTILALCCVAIWVVESI | Negative |
| K7XWG4 | SIGIEVLHETICVSLRTQRI | Negative |
| K7XWG4 | LALCCVAIWVVESIGIEVLH | Negative |
| K7XWG4 | LHETICVSLRTQRIPIQKIK | Negative |
| K7XWG4 | EVLHETICVSLRTQRIPIQK | Negative |

|        |                      |          |
|--------|----------------------|----------|
| K7XWG4 | ETICVSLRTQRIPIQKIKTY | Negative |
| L0DSL2 | DLNRLGRVGRWIAGAACLFL | Negative |
| L0DSL2 | LFLASAAHAEPGENLKPVDA | Negative |
| L0DSL2 | WIAGAACLFLASAAHAEPGE | Negative |
| L0DSL2 | CLFLASAAHAEPGENLKPVD | Negative |
| L0DSL2 | AHAEPGENLKPVDAMQCFDC | Negative |
| L0DSL2 | GRVGRWIAGAACLFLASAAH | Negative |
| L0DSL2 | NRLGRVGRWIAGAACLFLAS | Negative |
| L0DSL2 | GRWIAGAACLFLASAAHAEP | Negative |
| L0DSL2 | SAAHAEPGENLKPVDAMQCF | Negative |
| L0DSL2 | LNRLGRVGRWIAGAACLFLA | Negative |
| L0DSL2 | PGENLKPVDAMQCFDCHTQI | Negative |
| L0DSL2 | LGRVGRWIAGAACLFLASAA | Negative |
| L0DSL2 | MNDLNRLGRVGRWIAGAACL | Negative |
| L0DSL2 | NDLNRLGRVGRWIAGAACLF | Negative |
| L0DSL2 | RWIAGAACLFLASAAHAEPG | Negative |
| L0DSL2 | AACLFLASAAHAEPGENLKP | Negative |
| L0DSL2 | VGRWIAGAACLFLASAAHAE | Negative |
| L0DSL2 | AGACLFLASAAHAEPGENL  | Negative |
| L0DSL2 | LASAAHAEPGENLKPVDAMQ | Negative |
| L0DSL2 | EPGENLKPVDAMQCFDCHTQ | Negative |
| L0DSL2 | RVGRWIAGAACLFLASAAHA | Negative |
| L0DSL2 | AEPGENLKPVDAMQCFDCHT | Negative |
| L0DSL2 | FLASAAHAEPGENLKPVDAM | Negative |
| L0DSL2 | ASAAHAEPGENLKPVDAMQC | Negative |
| L0DSL2 | RLGRVGRWIAGAACLFLASA | Negative |
| L0DSL2 | ACLFLASAAHAEPGENLKPV | Negative |
| L0DSL2 | GAACLFLASAAHAEPGENLK | Negative |
| L0DSL2 | AAHAEPGENLKPVDAMQCFD | Negative |
| L0DSL2 | HAEPGENLKPVDAMQCFDCH | Negative |
| L8BRS3 | VADYSAPQGPAGYSCKNPAK | Negative |
| L8BRS3 | LFSSSHGAIQDFCVADYSAP | Negative |
| L8BRS3 | DYSAPQGPAGYSCKNPAKVT | Negative |
| L8BRS3 | FCVADYSAPQGPAGYSCKNP | Negative |
| L8BRS3 | DFCVADYSAPQGPAGYSCKN | Negative |
| L8BRS3 | LFSLLFSSSHGAIQDFCVAD | Negative |
| L8BRS3 | FSLLFSSSHGAIQDFCVADY | Negative |
| L8BRS3 | HGAIQDFCVADYSAPQGPAG | Negative |
| L8BRS3 | CVADYSAPQGPAGYSCKNPA | Negative |
| L8BRS3 | VPIFFLFSLLFSSSHGAIQD | Negative |
| L8BRS3 | AIQDFCVADYSAPQGPAGYS | Negative |
| L8BRS3 | GAIQDFCVADYSAPQGPAGY | Negative |
| L8BRS3 | ADYSAPQGPAGYSCKNPAKV | Negative |
| L8BRS3 | FLFSLLFSSSHGAIQDFCVA | Negative |
| L8BRS3 | LLFSSSHGAIQDFCVADYSA | Negative |
| L8BRS3 | SSHGAIQDFCVADYSAPQGP | Negative |

|        |                      |          |
|--------|----------------------|----------|
| L8BRS3 | QDFCVADYSAPQGPAGYSCK | Negative |
| L8BRS3 | MIVPIFFLFSLLFSSSHGAI | Negative |
| L8BRS3 | IQDFCVADYSAPQGPAGYSC | Negative |
| L8BRS3 | IFFLFSLLFSSSHGAIQDFC | Negative |
| L8BRS3 | SLLFSSSHGAIQDFCVADYS | Negative |
| L8BRS3 | FSSSHGAIQDFCVADYSAPQ | Negative |
| L8BRS3 | APQGPAGYSCKNPAKVTVDN | Negative |
| L8BRS3 | FFLFSLLFSSSHGAIQDFCV | Negative |
| L8BRS3 | SSSHGAIQDFCVADYSAPQG | Negative |
| L8BRS3 | YSAPQGPAGYSCKNPAKVTV | Negative |
| L8BRS3 | SHGAIQDFCVADYSAPQGPA | Negative |
| L8BRS3 | IVPIFFLFSLLFSSSHGAIQ | Negative |
| L8BRS3 | SAPQGPAGYSCKNPAKVTVD | Negative |
| O00092 | AAYLLSGRVSAAPSSAGSKS | Negative |
| O00092 | PSSAGSKSCDTVDLGYQCSP | Negative |
| O00092 | LSAAYLLSGRVSAAPSSAGS | Negative |
| O00092 | VTLTFLLSAAYLLSGRVSA  | Negative |
| O00092 | SKSCDTVDLGYQCSPATSHL | Negative |
| O00092 | GRVSAAPSSAGSKSCDTVDL | Negative |
| O00092 | MVTLTFLLSAAYLLSGRVSA | Negative |
| O00092 | SSAGSKSCDTVDLGYQCSPA | Negative |
| O00092 | LLSGRVSAAPSSAGSKSCDT | Negative |
| O00092 | VSAAPSSAGSKSCDTVDLGY | Negative |
| O00092 | LTFLLSAAYLLSGRVSAAPS | Negative |
| O00092 | KSCDTVDLGYQCSPATSHLW | Negative |
| O00092 | LLSAAYLLSGRVSAAPSSAG | Negative |
| O00092 | RVSAAPSSAGSKSCDTVDLG | Negative |
| O00092 | LSGRVSAAPSSAGSKSCDTV | Negative |
| O00092 | SCDTVDLGYQCSPATSHLWG | Negative |
| O00092 | APSSAGSKSCDTVDLGYQCS | Negative |
| O00092 | SGRVSAAPSSAGSKSCDTVD | Negative |
| O00092 | SAAYLLSGRVSAAPSSAGSK | Negative |
| O00092 | SAAPSSAGSKSCDTVDLGYQ | Negative |
| O00092 | FLLSAAYLLSGRVSAAPSSA | Negative |
| O00092 | AAPSSAGSKSCDTVDLGYQC | Negative |
| O00092 | CDTVDLGYQCSPATSHLWGQ | Negative |
| O00092 | AGSKSCDTVDLGYQCSPATS | Negative |
| O00092 | GSKSCDTVDLGYQCSPATSH | Negative |
| O00092 | AYLLSGRVSAAPSSAGSKSC | Negative |
| O00092 | SAGSKSCDTVDLGYQCSPAT | Negative |
| O00092 | TFLLSAAYLLSGRVSAAPSS | Negative |
| O00092 | TLTFLLSAAYLLSGRVSAAP | Negative |
| O00100 | TSGTALGPRGNHSDCTSVD  | Negative |
| O00100 | HSDCTSVDRGYQCFPELSHK | Negative |
| O00100 | LSIATLFGSTSGTALGPRGN | Negative |
| O00100 | VFVVLLSIATLFGSTSGTAL | Negative |



|        |                      |          |
|--------|----------------------|----------|
| O00100 | GNHSDCTSVDRGYQCFPELS | Negative |
| O00100 | MGVFVLLSIATLFGSTSGT  | Negative |
| O00100 | GPRGNHSDCTSVDRGYQCFP | Negative |
| O00100 | FVVLLSIATLFGSTSGTALG | Negative |
| O00100 | ATLFGSTSGTALGPRGNHSD | Negative |
| O00100 | PRGNHSDCTSVDRGYQCFPE | Negative |
| O00100 | GVFVLLSIATLFGSTSGTA  | Negative |
| O00100 | ALGPRGNHSDCTSVDRGYQC | Negative |
| O00100 | SGTALGPRGNHSDCTSVDRG | Negative |
| O00100 | RGNHSDCTSVDRGYQCFPEL | Negative |
| O00100 | FGSTSGTALGPRGNHSDCTS | Negative |
| O00100 | SDCTSVDRGYQCFPELSHKW | Negative |
| O00100 | GSTSGTALGPRGNHSDCTSV | Negative |
| O00100 | TALGPRGNHSDCTSVDRGYQ | Negative |
| O00100 | NHSDCTSVDRGYQCFPELSH | Negative |
| O00100 | LLSIATLFGSTSGTALGPRG | Negative |
| O00100 | LFGSTSGTALGPRGNHSDCT | Negative |
| O00100 | SIATLFGSTSGTALGPRGNH | Negative |
| O00100 | LGPRGNHSDCTSVDRGYQCF | Negative |
| O00100 | IATLFGSTSGTALGPRGNHS | Negative |
| O00100 | DCTSVDRGYQCFPELSHKWG | Negative |
| O00100 | TLFGSTSGTALGPRGNHSDC | Negative |
| O00100 | GTALGPRGNHSDCTSVDRGY | Negative |
| O00100 | VLLSIATLFGSTSGTALGPR | Negative |
| O00100 | STSGTALGPRGNHSDCTSD  | Negative |
| O00105 | AVTANNSQLLTWWHNTGEIN | Negative |
| O00105 | LTLSAAFQVAQAAVTANNSQ | Negative |
| O00105 | LLTLSAAFQVAQAAVTANNS | Negative |
| O00105 | SAAFQVAQAAVTANNSQLLT | Negative |
| O00105 | YLLTLSAAFQVAQAAVTANN | Negative |
| O00105 | ANNSQLLTWWHNTGEINTQT | Negative |
| O00105 | VTANNSQLLTWWHNTGEINT | Negative |
| O00105 | SQLLTWWHNTGEINTQTPVA | Negative |
| O00105 | VAQAAVTANNSQLLTWWHNT | Negative |
| O00105 | AAVTANNSQLLTWWHNTGEI | Negative |
| O00105 | TANNSQLLTWWHNTGEINTQ | Negative |
| O00105 | LTWWHNTGEINTQTPVADGN | Negative |
| O00105 | QVAQAAVTANNSQLLTWWHN | Negative |
| O00105 | NSQLLTWWHNTGEINTQTPV | Negative |
| O00105 | RSTGYLLTLSAAFQVAQAAV | Negative |
| O00105 | QLLTWWHNTGEINTQTPVAD | Negative |
| O00105 | TLSAAFQVAQAAVTANNSQL | Negative |
| O00105 | MRSTGYLLTLSAAFQVAQAA | Negative |
| O00105 | AQAAVTANNSQLLTWWHNTG | Negative |
| O00105 | LLTWWHNTGEINTQTPVADG | Negative |
| O00105 | STGYLLTLSAAFQVAQAAVT | Negative |

|        |                      |          |
|--------|----------------------|----------|
| O00105 | FQVAQAAVTANNSQLLTWWH | Negative |
| O00105 | AFQVAQAAVTANNSQLLTWW | Negative |
| O00105 | AAFQVAQAAVTANNSQLLTW | Negative |
| O00105 | QAAVTANNSQLLTWWHNTGE | Negative |
| O00105 | TWWHNTGEINTQTPVADGNV | Negative |
| O00105 | LSAAFQVAQAAVTANNSQLL | Negative |
| O00105 | NNSQLLTWWHNTGEINTQTP | Negative |
| O00105 | TGYLLTLSAAFQVAQAAVTA | Negative |
| O00175 | TSLLFLGVCAHHIPTGSVV  | Negative |
| O00175 | GLMTIVTSLLFLGVCAHHII | Negative |
| O00175 | VTSLFLFLGVCAHHIPTGSV | Negative |
| O00175 | VVIPSPCCMFFVSKRIPENR | Negative |
| O00175 | FLGVCAHHIPTGSVVIPSP  | Negative |
| O00175 | IVTSLLFLGVCAHHIPTGS  | Negative |
| O00175 | SLLFLGVCAHHIPTGSVVI  | Negative |
| O00175 | VCAHHIPTGSVVIPSPCCM  | Negative |
| O00175 | TGSVVIPSPCCMFFVSKRIP | Negative |
| O00175 | SVVIPSPCCMFFVSKRIPEN | Negative |
| O00175 | LMTIVTSLLFLGVCAHHIIP | Negative |
| O00175 | MAGLMTIVTSLLFLGVCAHH | Negative |
| O00175 | CAHHIPTGSVVIPSPCCMF  | Negative |
| O00175 | LLFLGVCAHHIPTGSVVIP  | Negative |
| O00175 | AHHIPTGSVVIPSPCCMFF  | Negative |
| O00175 | PTGSVVIPSPCCMFFVSKRI | Negative |
| O00175 | MTIVTSLLFLGVCAHHIPT  | Negative |
| O00175 | AGLMTIVTSLLFLGVCAHHI | Negative |
| O00175 | IPSPCCMFFVSKRIPENRVV | Negative |
| O00175 | HHIPTGSVVIPSPCCMFFVS | Negative |
| O00175 | PSPCCMFFVSKRIPENRVVS | Negative |
| O00175 | GVCAHHIPTGSVVIPSPCC  | Negative |
| O00175 | IPTGSVVIPSPCCMFFVSKR | Negative |
| O00175 | HHIPTGSVVIPSPCCMFFV  | Negative |
| O00175 | LGVC AHHIPTGSVVIPSPC | Negative |
| O00175 | IIPSGSVVIPSPCCMFFVSK | Negative |
| O00175 | GSVVIPSPCCMFFVSKRIPE | Negative |
| O00175 | TIVTSLLFLGVCAHHIPTG  | Negative |
| O00175 | VIPSPCCMFFVSKRIPENRV | Negative |
| O00300 | PPKYLHYDEETSHQLLCDKC | Negative |
| O00300 | LLCCALVFLDISIKWTTQET | Negative |
| O00300 | IKWTTQETFPKYLHYDEET  | Negative |
| O00300 | KYLHYDEETSHQLLCDKCP  | Negative |
| O00300 | WTTQETFPKYLHYDEETSH  | Negative |
| O00300 | TFPPKYLHYDEETSHQLLCD | Negative |
| O00300 | FPPKYLHYDEETSHQLLCDK | Negative |
| O00300 | VFLDISIKWTTQETFPKYL  | Negative |
| O00300 | ALVFLDISIKWTTQETFPK  | Negative |

|        |                      |          |
|--------|----------------------|----------|
| O00300 | LHYDEETSHQLLCDKCPPGT | Negative |
| O00300 | TQETFPPKYLHYDEETSHQL | Negative |
| O00300 | NNLLCCALVFLDISIKWTTQ | Negative |
| O00300 | TTQETFPPKYLHYDEETSHQ | Negative |
| O00300 | LDISIKWTTQETFPPKYLHY | Negative |
| O00300 | DISIKWTTQETFPPKYLHYD | Negative |
| O00300 | NLLCCALVFLDISIKWTTQE | Negative |
| O00300 | YLHYDEETSHQLLCDKCPPG | Negative |
| O00300 | LVFLDISIKWTTQETFPPKY | Negative |
| O00300 | HYDEETSHQLLCDKCPPGT  | Negative |
| O00300 | LCCALVFLDISIKWTTQETF | Negative |
| O00300 | KWTTQETFPPKYLHYDEETS | Negative |
| O00300 | CCALVFLDISIKWTTQETFP | Negative |
| O00300 | FLDISIKWTTQETFPPKYLH | Negative |
| O00300 | ETFPKYLHYDEETSHQLLC  | Negative |
| O00300 | MNNLLCCALVFLDISIKWTT | Negative |
| O00300 | ISIKWTTQETFPPKYLHYDE | Negative |
| O00300 | SIKWTTQETFPPKYLHYDEE | Negative |
| O00300 | PKYLHYDEETSHQLLCDKCP | Negative |
| O00300 | QETFPPKYLHYDEETSHQLL | Negative |
| O00585 | GIPRTQGS DGAQDCCLKYS | Negative |
| O00585 | MAQSLALSLILVLAFGIPR  | Negative |
| O00585 | QSLALSLILVLAFGIPRTQ  | Negative |
| O00585 | RTQGS DGAQDCCLKYSQRK | Negative |
| O00585 | DGAQDCCLKYSQRKIPAKV  | Negative |
| O00585 | SLALSLILVLAFGIPRTQG  | Negative |
| O00585 | IPRTQGS DGAQDCCLKYSQ | Negative |
| O00585 | LAFGIPRTQGS DGAQDCCL | Negative |
| O00585 | LSLLILVLAFGIPRTQGS D | Negative |
| O00585 | DCCLKYSQRKIPAKVVRSYR | Negative |
| O00585 | SLILVLAFGIPRTQGS D   | Negative |
| O00585 | TQGS DGAQDCCLKYSQRKI | Negative |
| O00585 | GGAQDCCLKYSQRKIPAKVV | Negative |
| O00585 | AQSLALSLILVLAFGIPRT  | Negative |
| O00585 | AFGIPRTQGS DGAQDCCLK | Negative |
| O00585 | GAQDCCLKYSQRKIPAKVVR | Negative |
| O00585 | ILVLAFGIPRTQGS DGAQD | Negative |
| O00585 | LALSLILVLAFGIPRTQGS  | Negative |
| O00585 | FGIPRTQGS DGAQDCCLKY | Negative |
| O00585 | ALSLILVLAFGIPRTQGS D | Negative |
| O00585 | SDGAQDCCLKYSQRKIPAK  | Negative |
| O00585 | VLAFGIPRTQGS DGAQDCC | Negative |
| O00585 | AQDCCLKYSQRKIPAKVVR  | Negative |
| O00585 | QDCCLKYSQRKIPAKVVR   | Negative |
| O00585 | PRTQGS DGAQDCCLKYSQR | Negative |
| O00585 | LILVLAFGIPRTQGS DGAQ | Negative |

|        |                      |          |
|--------|----------------------|----------|
| O00585 | LVLAFGIPRTQGSDGGAQDC | Negative |
| O00585 | GSDGGAQDCCLKYSQRKIPA | Negative |
| O00585 | QGSDGGAQDCCLKYSQRKIP | Negative |
| O00602 | LSGATMARGLAVLLVLFLHI | Negative |
| O00602 | GLAVLLVLFLHIKNLPAQAA | Negative |
| O00602 | NLPAQAADTCPEVKVVGLEG | Negative |
| O00602 | LPAQAADTCPEVKVVGLEGS | Negative |
| O00602 | LVLFLHIKNLPAQAADTCPE | Negative |
| O00602 | TMARGLAVLLVLFLHIKNLP | Negative |
| O00602 | MARGLAVLLVLFLHIKNLPA | Negative |
| O00602 | QAADTCPEVKVVGLEGSDKL | Negative |
| O00602 | IKNLPAQAADTCPEVKVVG  | Negative |
| O00602 | PAQAADTCPEVKVVGLEGSD | Negative |
| O00602 | HIKNLPAQAADTCPEVKVVG | Negative |
| O00602 | VLFLHIKNLPAQAADTCPEV | Negative |
| O00602 | GATMARGLAVLLVLFLHIKN | Negative |
| O00602 | ATMARGLAVLLVLFLHIKNL | Negative |
| O00602 | SGATMARGLAVLLVLFLHIK | Negative |
| O00602 | LAVLLVLFLHIKNLPAQAAD | Negative |
| O00602 | ADTCPEVKVVGLEGSDKLTI | Negative |
| O00602 | KNLPAQAADTCPEVKVVGLE | Negative |
| O00602 | AVLLVLFLHIKNLPAQAADT | Negative |
| O00602 | AADTCPEVKVVGLEGSDKLT | Negative |
| O00602 | LFLHIKNLPAQAADTCPEVK | Negative |
| O00602 | MELSGATMARGLAVLLVLFL | Negative |
| O00602 | AQAADTCPEVKVVGLEGSDK | Negative |
| O00602 | ELSGATMARGLAVLLVLFLH | Negative |
| O00602 | VLLVLFLHIKNLPAQAADTC | Negative |
| O00602 | LHIKNLPAQAADTCPEVKVV | Negative |
| O00602 | RGLAVLLVLFLHIKNLPAQA | Negative |
| O00602 | ARGLAVLLVLFLHIKNLPAQ | Negative |
| O00602 | FLHIKNLPAQAADTCPEVKV | Negative |
| O00626 | AVALQATEAGPYGANMEDSV | Negative |
| O00626 | QATEAGPYGANMEDSVCCRD | Negative |
| O00626 | ALLVVLVLLAVALQATEAGP | Negative |
| O00626 | TALLVVLVLLAVALQATEAG | Negative |
| O00626 | ATEAGPYGANMEDSVCCRDY | Negative |
| O00626 | RLQTALLVVLVLLAVALQAT | Negative |
| O00626 | VALQATEAGPYGANMEDSVC | Negative |
| O00626 | GANMEDSVCCRDYVRYRLPL | Negative |
| O00626 | VLVLLAVALQATEAGPYGAN | Negative |
| O00626 | PYGANMEDSVCCRDYVRYRL | Negative |
| O00626 | YGANMEDSVCCRDYVRYRLP | Negative |
| O00626 | MDRLQTALLVVLVLLAVALQ | Negative |
| O00626 | LVLLAVALQATEAGPYGANM | Negative |
| O00626 | LQTALLVVLVLLAVALQATE | Negative |

|        |                      |          |
|--------|----------------------|----------|
| O00626 | LLAVALQATEAGPYGANMED | Negative |
| O00626 | LLVVLVLLAVALQATEAGPY | Negative |
| O00626 | ALQATEAGPYGANMEDSVCC | Negative |
| O00626 | VLLAVALQATEAGPYGANME | Negative |
| O00626 | ANMEDSVCCRDYVRYRLPLR | Negative |
| O00626 | AGPYGANMEDSVCCRDYVRY | Negative |
| O00626 | LAVALQATEAGPYGANMEDS | Negative |
| O00626 | LQATEAGPYGANMEDSVCCR | Negative |
| O00626 | GPYGANMEDSVCCRDYVRYR | Negative |
| O00626 | LVVLVLLAVALQATEAGPYG | Negative |
| O00626 | TEAGPYGANMEDSVCCRDYV | Negative |
| O00626 | EAGPYGANMEDSVCCRDYVR | Negative |
| O00626 | NMEDSVCCRDYVRYRLPLRV | Negative |
| O00626 | DRLQTALLVVLVLLAVALQA | Negative |
| O00626 | QTALLVVLVLLAVALQATEA | Negative |
| O00748 | CGLLLLLVRGQGQDSASPIR | Negative |
| O00748 | ASPIRTTHTGQVLGSLVHVK | Negative |
| O00748 | LLVRGQGQDSASPIRTTHT  | Negative |
| O00748 | GLLLLVRGQGQDSASPIRT  | Negative |
| O00748 | VRGQGQDSASPIRTTHTGQV | Negative |
| O00748 | RLRARLSAVACGLLLLLVRG | Negative |
| O00748 | LRARLSAVACGLLLLLVRGQ | Negative |
| O00748 | MRLHRLRARLSAVACGLLLL | Negative |
| O00748 | RARLSAVACGLLLLLVRGQG | Negative |
| O00748 | QGQDSASPIRTTHTGQVLGS | Negative |
| O00748 | RGQGQDSASPIRTTHTGQVL | Negative |
| O00748 | GQGQDSASPIRTTHTGQVLG | Negative |
| O00748 | ACGLLLLLVRGQGQDSASPI | Negative |
| O00748 | VACGLLLLLVRGQGQDSASP | Negative |
| O00748 | DSASPIRTTHTGQVLGSLVH | Negative |
| O00748 | RLSAVACGLLLLLVRGQGQD | Negative |
| O00748 | LLLLVRGQGQDSASPIRTTH | Negative |
| O00748 | SAVACGLLLLLVRGQGQDSA | Negative |
| O00748 | GQDSASPIRTTHTGQVLGSL | Negative |
| O00748 | LVRGQGQDSASPIRTTHTGQ | Negative |
| O00748 | RLHRLRARLSAVACGLLLLL | Negative |
| O00748 | SASPIRTTHTGQVLGSLVHV | Negative |
| O00748 | LHRLRARLSAVACGLLLLLV | Negative |
| O00748 | LLVRGQGQDSASPIRTTHTG | Negative |
| O00748 | ARLSAVACGLLLLLVRGQGQ | Negative |
| O00748 | LLLLVRGQGQDSASPIRTT  | Negative |
| O00748 | QDSASPIRTTHTGQVLGSLV | Negative |
| O00748 | HRLRARLSAVACGLLLLLVR | Negative |
| O00748 | LSAVACGLLLLLVRGQGQDS | Negative |
| O02826 | NQSLKPNECQDLKGVSHPLN | Negative |
| O02826 | PNQSLKPNECQDLKGVSHPL | Negative |

|        |                      |          |
|--------|----------------------|----------|
| O02826 | LVVLATFVTLCNSQCYFIPN | Negative |
| O02826 | SQCYFIPNQSLKPNECQDLK | Negative |
| O02826 | FLLGTLVVLATFVTLCNSQC | Negative |
| O02826 | VLATFVTLCNSQCYFIPNQS | Negative |
| O02826 | QCYFIPNQSLKPNECQDLKG | Negative |
| O02826 | MKFLLGTLVVLATFVTLCNS | Negative |
| O02826 | LLGTLVVLATFVTLCNSQCY | Negative |
| O02826 | IPNQSLKPNECQDLKGVSHP | Negative |
| O02826 | CNSQCYFIPNQSLKPNECQD | Negative |
| O02826 | QSLKPNECQDLKGVSHPLNS | Negative |
| O02826 | LCNSQCYFIPNQSLKPNECQ | Negative |
| O02826 | CYFIPNQSLKPNECQDLKGV | Negative |
| O02826 | FIPNQSLKPNECQDLKGVSH | Negative |
| O02826 | YFIPNQSLKPNECQDLKGV  | Negative |
| O02826 | ATFVTLCNSQCYFIPNQSLK | Negative |
| O02826 | LGTLVVLATFVTLCNSQCYF | Negative |
| O02826 | TFVTLCNSQCYFIPNQSLKP | Negative |
| O02826 | LATFVTLCNSQCYFIPNQSL | Negative |
| O02826 | VVLATFVTLCNSQCYFIPNQ | Negative |
| O02826 | KFLLGTLVVLATFVTLCNSQ | Negative |
| O02826 | LKPNECQDLKGVSHPLNSVW | Negative |
| O02826 | NSQCYFIPNQSLKPNECQDL | Negative |
| O02826 | TLVVLATFVTLCNSQCYFIP | Negative |
| O02826 | TLCNSQCYFIPNQSLKPNEC | Negative |
| O02826 | FVTLCNSQCYFIPNQSLKPN | Negative |
| O02826 | VTLCNSQCYFIPNQSLKPNE | Negative |
| O02826 | SLKPNECQDLKGVSHPLNSV | Negative |
| O02853 | WMALLLLGVLGVLQTPAPAQ | Negative |
| O02853 | VLGVLQTPAPAQAALQPNFE | Negative |
| O02853 | TPAPAQAALQPNFEEDKFLG | Negative |
| O02853 | LGVLQTPAPAQAALQPNFEE | Negative |
| O02853 | ATPNRLWMALLLLGVLGVLQ | Negative |
| O02853 | PAPAQAALQPNFEEDKFLGR | Negative |
| O02853 | LQTPAPAQAALQPNFEEDKF | Negative |
| O02853 | VLQTPAPAQAALQPNFEEDK | Negative |
| O02853 | MATPNRLWMALLLLGVLGVL | Negative |
| O02853 | RLWMALLLLGVLGVLQTPAP | Negative |
| O02853 | AQAALQPNFEEDKFLGRWFT | Negative |
| O02853 | PAQAALQPNFEEDKFLGRWF | Negative |
| O02853 | QAALQPNFEEDKFLGRWFTS | Negative |
| O02853 | LLLGVLGVLQTPAPAQAAL  | Negative |
| O02853 | LLGVLGVLQTPAPAQAALQ  | Negative |
| O02853 | LLGVLGVLQTPAPAQAALQP | Negative |
| O02853 | NRLWMALLLLGVLGVLQTPA | Negative |
| O02853 | APAQAALQPNFEEDKFLGRW | Negative |
| O02853 | ALQPNFEEDKFLGRWFTSGL | Negative |

|        |                      |          |
|--------|----------------------|----------|
| O02853 | TPNRLWMALLLLGVLGVLQT | Negative |
| O02853 | QTPAPAQAALQPNFEEDKFL | Negative |
| O02853 | LWMALLLLGVLGVLQTPAPA | Negative |
| O02853 | GVLGVLQTPAPAQAALQPNF | Negative |
| O02853 | LQPNFEEDKFLGRWFTSGLA | Negative |
| O02853 | GVLQTPAPAQAALQPNFEED | Negative |
| O02853 | MALLLLGVLGVLQTPAPAQA | Negative |
| O02853 | AALQPNFEEDKFLGRWFTSG | Negative |
| O02853 | ALLLLGVLGVLQTPAPAQAA | Negative |
| O02853 | PNRLWMALLLLGVLGVLQTP | Negative |
| O04004 | WRPTMFAASPTCDTVQNILA | Negative |
| O04004 | LWSVAVGLLLVSWRPTMFAA | Negative |
| O04004 | PTMFAASPTCDTVQNILAPC | Negative |
| O04004 | MFAASPTCDTVQNILAPCAG | Negative |
| O04004 | GLLVSWRPTMFAASPTCDT  | Negative |
| O04004 | LLVSWRPTMFAASPTCDTVQ | Negative |
| O04004 | VAVGLLLVSWRPTMFAASPT | Negative |
| O04004 | ILWSVAVGLLLVSWRPTMFA | Negative |
| O04004 | WSVAVGLLLVSWRPTMFAAS | Negative |
| O04004 | LVSWRPTMFAASPTCDTVQN | Negative |
| O04004 | IRILWSVAVGLLLVSWRPTM | Negative |
| O04004 | ASPTCDTVQNILAPCAGFLT | Negative |
| O04004 | MDCIRILWSVAVGLLLVSWR | Negative |
| O04004 | FAASPTCDTVQNILAPCAGF | Negative |
| O04004 | SPTCDTVQNILAPCAGFLTG | Negative |
| O04004 | CDTVQNILAPCAGFLTGQEP | Negative |
| O04004 | TMFAASPTCDTVQNILAPCA | Negative |
| O04004 | VSWRPTMFAASPTCDTVQNI | Negative |
| O04004 | TCDTVQNILAPCAGFLTGQE | Negative |
| O04004 | SVAVGLLLVSWRPTMFAASP | Negative |
| O04004 | DCIRILWSVAVGLLLVSWRP | Negative |
| O04004 | AASPTCDTVQNILAPCAGFL | Negative |
| O04004 | LLVSWRPTMFAASPTCDTV  | Negative |
| O04004 | RILWSVAVGLLLVSWRPTMF | Negative |
| O04004 | RPTMFAASPTCDTVQNILAP | Negative |
| O04004 | PTCDTVQNILAPCAGFLTGQ | Negative |
| O04004 | SWRPTMFAASPTCDTVQNIL | Negative |
| O04004 | VGLLLVSWRPTMFAASPTCD | Negative |
| O04004 | CIRILWSVAVGLLLVSWRPT | Negative |
| O05465 | ALSVLISTLLISETAQAADA | Negative |
| O05465 | SSTHKPLISLALSVLISTLL | Negative |
| O05465 | LTAKKSSTHKPLISLALSVL | Negative |
| O05465 | VLISTLLISETAQAADANDR | Negative |
| O05465 | KKSSTHKPLISLALSVLIST | Negative |
| O05465 | LSVLISTLLISETAQAADAN | Negative |
| O05465 | STHKPLISLALSVLISTLLI | Negative |

|        |                      |          |
|--------|----------------------|----------|
| O05465 | TSTLTAKKSSTHKPLISLAL | Negative |
| O05465 | LALSVLISTLLISETAQAAD | Negative |
| O05465 | PLISLALSVLISTLLISETA | Negative |
| O05465 | LISTLLISETAQAADANDRL | Negative |
| O05465 | KPLISLALSVLISTLLISET | Negative |
| O05465 | HKPLISLALSVLISTLLISE | Negative |
| O05465 | TAKKSSTHKPLISLALSVLI | Negative |
| O05465 | TLLISETAQAADANDRLEQE | Negative |
| O05465 | AKKSSTHKPLISLALSVLIS | Negative |
| O05465 | STLLISETAQAADANDRLEQ | Negative |
| O05465 | SLALSVLISTLLISETAQAA | Negative |
| O05465 | STLTAKKSSTHKPLISLALS | Negative |
| O05465 | LFTSTLTAKKSSTHKPLISL | Negative |
| O05465 | ISTLLISETAQAADANDRLE | Negative |
| O05465 | ISLALSVLISTLLISETAQ  | Negative |
| O05465 | TLTAKKSSTHKPLISLALSV | Negative |
| O05465 | LISLALSVLISTLLISETAQ | Negative |
| O05465 | THKPLISLALSVLISTLLIS | Negative |
| O05465 | KSSTHKPLISLALSVLISTL | Negative |
| O05465 | FTSTLTAKKSSTHKPLISLA | Negative |
| O05465 | KLFTSTLTAKKSSTHKPLIS | Negative |
| O05465 | MKLFTSTLTAKKSSTHKPLI | Negative |
| O05512 | AHTVSPVNPNAQQTTKTVMN | Negative |
| O05512 | FKKHTISLLIIFLLASAVLA | Negative |
| O05512 | LLASAVLAKPIEAHTVSPVN | Negative |
| O05512 | ASAVLAKPIEAHTVSPVNP  | Negative |
| O05512 | AKPIEAHTVSPVNPNAQQTT | Negative |
| O05512 | FLLASAVLAKPIEAHTVSPV | Negative |
| O05512 | TISLLIIFLLASAVLAKPIE | Negative |
| O05512 | KHTISLLIIFLLASAVLAKP | Negative |
| O05512 | SPVNPNAQQTTKTVMNWLH  | Negative |
| O05512 | SAVLAKPIEAHTVSPVNPNA | Negative |
| O05512 | LLIIFLLASAVLAKPIEAHT | Negative |
| O05512 | TVSPVNPNAQQTTKTVMNWL | Negative |
| O05512 | KPIEAHTVSPVNPNAQQTTK | Negative |
| O05512 | LASAVLAKPIEAHTVSPVNP | Negative |
| O05512 | HTISLLIIFLLASAVLAKPI | Negative |
| O05512 | LIIFLLASAVLAKPIEAHTV | Negative |
| O05512 | IEAHTVSPVNPNAQQTTKTV | Negative |
| O05512 | PIEAHTVSPVNPNAQQTTKT | Negative |
| O05512 | LAKPIEAHTVSPVNPNAQQT | Negative |
| O05512 | EAHTVSPVNPNAQQTTKTVM | Negative |
| O05512 | HTVSPVNPNAQQTTKTVMNW | Negative |
| O05512 | KKHTISLLIIFLLASAVLAK | Negative |
| O05512 | VLAKPIEAHTVSPVNPNAQQ | Negative |
| O05512 | SLLIIFLLASAVLAKPIEAH | Negative |



|        |                      |          |
|--------|----------------------|----------|
| O05512 | AVLAKPIEAHTVSPVNPNAQ | Negative |
| O05512 | VSPVNPNAQQTTKTVMNWLA | Negative |
| O05512 | ISLLIIFLLASAVLAKPIEA | Negative |
| O05512 | IIFLLASAVLAKPIEAHTVS | Negative |
| O05512 | MFKKHTISLLIIFLLASAVL | Negative |
| O07532 | LVVTPAEAATIKVKSGDSLW | Negative |
| O07532 | TTLVVTPAEAATIKVKSGDS | Negative |
| O07532 | MKKKLAAGLTASAIVGTTLV | Negative |
| O07532 | AAGLTASAIVGTTLVVTPAE | Negative |
| O07532 | KKLAAGLTASAIVGTTLVVT | Negative |
| O07532 | TASAIVGTTLVVTPAEAATI | Negative |
| O07532 | KKKLAAGLTASAIVGTTLVV | Negative |
| O07532 | LTASAIVGTTLVVTPAEAAT | Negative |
| O07532 | AEAATIKVKSGDSLWKLAQT | Negative |
| O07532 | PAEAATIKVKSGDSLWKLAQ | Negative |
| O07532 | VTPAEAATIKVKSGDSLWKL | Negative |
| O07532 | TLVVTPAEAATIKVKSGDSL | Negative |
| O07532 | ATIKVKSGDSLWKLAQTYNT | Negative |
| O07532 | GTTLVVTPAEAATIKVKSGD | Negative |
| O07532 | LAAGLTASAIVGTTLVVTPA | Negative |
| O07532 | KLAAGLTASAIVGTTLVVTP | Negative |
| O07532 | VGTTLVVTPAEAATIKVKSG | Negative |
| O07532 | AIVGTTLVVTPAEAATIKVK | Negative |
| O07532 | AATIKVKSGDSLWKLAQTYN | Negative |
| O07532 | KVKSGDSLWKLAQTYNTSVA | Negative |
| O07532 | EAATIKVKSGDSLWKLAQTY | Negative |
| O07532 | VVTPAEAATIKVKSGDSLWK | Negative |
| O07532 | ASAIVGTTLVVTPAEAATIK | Negative |
| O07532 | IVGTTLVVTPAEAATIKVKS | Negative |
| O07532 | TPAEAATIKVKSGDSLWKLA | Negative |
| O07532 | TIKVKSGDSLWKLAQTYNTS | Negative |
| O07532 | AGLTASAIVGTTLVVTPAEA | Negative |
| O07532 | IKVKSGDSLWKLAQTYNTSV | Negative |
| O07532 | GLTASAIVGTTLVVTPAEAA | Negative |
| O07834 | ITSALAASATPPDVAKKPHV | Negative |
| O07834 | PPDVAKKPHVVKAPHGAERN | Negative |
| O07834 | PDVAKKPHVVKAPHGAERN  | Negative |
| O07834 | TVLMSTPITSALAASATPPD | Negative |
| O07834 | DVAKKPHVVKAPHGAERNDE | Negative |
| O07834 | ALAASATPPDVAKKPHVKA  | Negative |
| O07834 | STPITSALAASATPPDVAKK | Negative |
| O07834 | PITSALAASATPPDVAKKPH | Negative |
| O07834 | ATVLMSTPITSALAASATPP | Negative |
| O07834 | LLAATVLMSTPITSALAASA | Negative |
| O07834 | TPITSALAASATPPDVAKKP | Negative |
| O07834 | SATPPDVAKKPHVVKAPHGA | Negative |

|        |                       |          |
|--------|-----------------------|----------|
| O07834 | SALAASATPPDVAKKPHVVK  | Negative |
| O07834 | AASATPPDVAKKPHVVKAPH  | Negative |
| O07834 | TSLLLAATVLMSTPITSALA  | Negative |
| O07834 | TPPDVAKKPHVVKAPHGAER  | Negative |
| O07834 | LAATVLMSTPITSALAASAT  | Negative |
| O07834 | MKPTSLLLAATVLMSTPITS  | Negative |
| O07834 | SLLLAATVLMSTPITSALAA  | Negative |
| O07834 | KPTSLLLAATVLMSTPITSA  | Negative |
| O07834 | LLLAATVLMSTPITSALAAS  | Negative |
| O07834 | VLMSTPITSALAASATPPDV  | Negative |
| O07834 | LAASATPPDVAKKPHVVKAP  | Negative |
| O07834 | ASATPPDVAKKPHVVKAPHG  | Negative |
| O07834 | TSALAASATPPDVAKKPHVV  | Negative |
| O07834 | LMSTPITSALAASATPPDVA  | Negative |
| O07834 | PTSLLLAATVLMSTPITSAL  | Negative |
| O07834 | ATPPDVAKKPHVVKAPHGAE  | Negative |
| O07834 | MSTPITSALAASATPPDVAK  | Negative |
| O07921 | LMMSETVFAAGLNKDQKRRRA | Negative |
| O07921 | MQKADFWKKA AISLLVFTMF | Negative |
| O07921 | MMSETVFAAGLNKDQKRRAE  | Negative |
| O07921 | ISMQKADFWKKA AISLLVFT | Negative |
| O07921 | DFWKKA AISLLVFTMFFTL  | Negative |
| O07921 | WKKA AISLLVFTMFFTL    | Negative |
| O07921 | MFFTLMMSETVFAAGLNKDQ  | Negative |
| O07921 | ADFWKKA AISLLVFTMFFTL | Negative |
| O07921 | TMFFTLMMSETVFAAGLNKD  | Negative |
| O07921 | LVFTMFFTLMMSETVFAAGL  | Negative |
| O07921 | MSETVFAAGLNKDQKRRAEQ  | Negative |
| O07921 | AISLLVFTMFFTLMMSETVF  | Negative |
| O07921 | KKAAISLLVFTMFFTLMMSE  | Negative |
| O07921 | TLMMSETVFAAGLNKDQKRR  | Negative |
| O07921 | SLLVFTMFFTLMMSETVFAA  | Negative |
| O07921 | SETVFAAGLNKDQKRRAEQL  | Negative |
| O07921 | KISMQKADFWKKA AISLLVF | Negative |
| O07921 | FWKKA AISLLVFTMFFTL   | Negative |
| O07921 | KADFWKKA AISLLVFTMFFT | Negative |
| O07921 | QKADFWKKA AISLLVFTMFF | Negative |
| O07921 | FFTLMMSETVFAAGLNKDQK  | Negative |
| O07921 | MKISMQKADFWKKA AISLLV | Negative |
| O07921 | AAISLLVFTMFFTLMMSETV  | Negative |
| O07921 | LLVFTMFFTLMMSETVFAAG  | Negative |
| O07921 | VFTMFFTLMMSETVFAAGLN  | Negative |
| O07921 | KAAISLLVFTMFFTLMMSET  | Negative |
| O07921 | ISLLVFTMFFTLMMSETVFA  | Negative |
| O07921 | SMQKADFWKKA AISLLVFTM | Negative |
| O07921 | FTLMMSETVFAAGLNKDQKR  | Negative |

|        |                      |          |
|--------|----------------------|----------|
| O08498 | ALGLTSLQAFGQENPDVKIE | Negative |
| O08498 | SLQAFGQENPDVKIEKLKDN | Negative |
| O08498 | LGLTSLQAFGQENPDVKIEK | Negative |
| O08498 | MLKKIKISLILALGLTSLQA | Negative |
| O08498 | PDVKIEKLKDNLYVYTTYNT | Negative |
| O08498 | LQAFGQENPDVKIEKLKDNL | Negative |
| O08498 | LKKIKISLILALGLTSLQAF | Negative |
| O08498 | KIEKLKDNLYVYTTYNTFNG | Negative |
| O08498 | IKISLILALGLTSLQAFGQE | Negative |
| O08498 | LILALGLTSLQAFGQENPDV | Negative |
| O08498 | FGQENPDVKIEKLKDNLYVY | Negative |
| O08498 | NPDVKIEKLKDNLYVYTTYN | Negative |
| O08498 | LALGLTSLQAFGQENPDVKI | Negative |
| O08498 | AFGQENPDVKIEKLKDNLYV | Negative |
| O08498 | TSLQAFGQENPDVKIEKLKD | Negative |
| O08498 | ILALGLTSLQAFGQENPDVK | Negative |
| O08498 | IEKLKDNLYVYTTYNTFNGT | Negative |
| O08498 | QENPDVKIEKLKDNLYVYTT | Negative |
| O08498 | ISLILALGLTSLQAFGQENP | Negative |
| O08498 | VKIEKLKDNLYVYTTYNTFN | Negative |
| O08498 | ENPDVKIEKLKDNLYVYTTY | Negative |
| O08498 | KKIKISLILALGLTSLQAFG | Negative |
| O08498 | DVKIEKLKDNLYVYTTYNTF | Negative |
| O08498 | QAFGQENPDVKIEKLKDNLY | Negative |
| O08498 | LTSLQAFGQENPDVKIEKLK | Negative |
| O08498 | GLTSLQAFGQENPDVKIEKL | Negative |
| O08498 | GQENPDVKIEKLKDNLYVYT | Negative |
| O08498 | KIKISLILALGLTSLQAFGQ | Negative |
| O08498 | KISLILALGLTSLQAFGQEN | Negative |
| O08523 | ELMYPFWQNDTRTPKVDDGS | Negative |
| O08523 | MNYSSLLRIWVSFIFALVRH | Negative |
| O08523 | LVRHQAQPRELMYPFWQNDT | Negative |
| O08523 | ALVRHQAQPRELMYPFWQND | Negative |
| O08523 | VSFIFALVRHQAQPRELMYP | Negative |
| O08523 | RELMYPFWQNDTRTPKVDDG | Negative |
| O08523 | QAQPRELMYPFWQNDTRTPK | Negative |
| O08523 | RIWVSFIFALVRHQAQPREL | Negative |
| O08523 | RHQAQPRELMYPFWQNDTRT | Negative |
| O08523 | IWVSFIFALVRHQAQPRELM | Negative |
| O08523 | QPRELMYPFWQNDTRTPKVD | Negative |
| O08523 | YPFWQNDTRTPKVDDGSSSE | Negative |
| O08523 | FIFALVRHQAQPRELMYPFW | Negative |
| O08523 | SLLRIWVSFIFALVRHQAQP | Negative |
| O08523 | PRELMYPFWQNDTRTPKVDD | Negative |
| O08523 | LMYPFWQNDTRTPKVDDGSS | Negative |
| O08523 | PFWQNDTRTPKVDDGSSSEI | Negative |

|        |                      |          |
|--------|----------------------|----------|
| O08523 | MYPFWQNDTRTPKVDDGSSS | Negative |
| O08523 | YSSLLRIWVSFIFALVRHQA | Negative |
| O08523 | SSLLRIWVSFIFALVRHQAQ | Negative |
| O08523 | AQPRELMYPFWQNDTRTPKV | Negative |
| O08523 | FALVRHQAQPRELMYPFWQN | Negative |
| O08523 | IFALVRHQAQPRELMYPFWQ | Negative |
| O08523 | SFIFALVRHQAQPRELMYPF | Negative |
| O08523 | VRHQAQPRELMYPFWQNDTR | Negative |
| O08523 | HQAQPRELMYPFWQNDTRTP | Negative |
| O08523 | LRIWVSFIFALVRHQAQPRE | Negative |
| O08523 | NYSSLLRIWVSFIFALVRHQ | Negative |
| O08523 | LLRIWVSFIFALVRHQAQPR | Negative |
| O09049 | RITITIMSWMLLSCLMLLSQ | Negative |
| O09049 | GEVAKKDAPSSRSSCPKGSR | Negative |
| O09049 | LPRITITIMSWMLLSCLMLL | Negative |
| O09049 | VAKKDAPSSRSSCPKGSRAY | Negative |
| O09049 | ITITIMSWMLLSCLMLLSQV | Negative |
| O09049 | QVQGEVAKKDAPSSRSSCPK | Negative |
| O09049 | VQGEVAKKDAPSSRSSCPKG | Negative |
| O09049 | TITIMSWMLLSCLMLLSQVQ | Negative |
| O09049 | SCLMLLSQVQGEVAKKDAPS | Negative |
| O09049 | MSWMLLSCLMLLSQVQGEVA | Negative |
| O09049 | PRITITIMSWMLLSCLMLLS | Negative |
| O09049 | QGEVAKKDAPSSRSSCPKGS | Negative |
| O09049 | LSQVQGEVAKKDAPSSRSSC | Negative |
| O09049 | AKKDAPSSRSSCPKGSRAYG | Negative |
| O09049 | LLSCLMLLSQVQGEVAKKDA | Negative |
| O09049 | LMLLSQVQGEVAKKDAPSSR | Negative |
| O09049 | SQVQGEVAKKDAPSSRSSCP | Negative |
| O09049 | IMSWMLLSCLMLLSQVQGEV | Negative |
| O09049 | CLMLLSQVQGEVAKKDAPSS | Negative |
| O09049 | ITIMSWMLLSCLMLLSQVQG | Negative |
| O09049 | LSCLMLLSQVQGEVAKKDAP | Negative |
| O09049 | KKDAPSSRSSCPKGSRAYGS | Negative |
| O09049 | MLPRITITIMSWMLLSCLML | Negative |
| O09049 | SWMLLSCLMLLSQVQGEVAK | Negative |
| O09049 | MLLSQVQGEVAKKDAPSSRS | Negative |
| O09049 | LLSQVQGEVAKKDAPSSRSS | Negative |
| O09049 | TIMSWMLLSCLMLLSQVQGE | Negative |
| O09049 | MLLSCLMLLSQVQGEVAKKD | Negative |
| O09049 | EVAKKDAPSSRSSCPKGSRA | Negative |
| O09165 | RLALLFVLVLGTPRLGVQGE | Negative |
| O09165 | RAVSELRLALLFVLVLGTPR | Negative |
| O09165 | ARAVSELRLALLFVLVLGTP | Negative |
| O09165 | VLGTPRLGVQGEDGLDFPEY | Negative |
| O09165 | RMGARAVSELRLALLFVLVL | Negative |

|        |                      |          |
|--------|----------------------|----------|
| O09165 | LGTPRLGVQGEDGLDFPEYD | Negative |
| O09165 | FVLVLGTPRLGVQGEDGLDF | Negative |
| O09165 | AVSELRLALLFVLVLGTPRL | Negative |
| O09165 | VLVLGTPRLGVQGEDGLDFP | Negative |
| O09165 | ALLFVLVLGTPRLGVQGEDG | Negative |
| O09165 | RATDRMGARAVSELRLALLF | Negative |
| O09165 | SELRLALLFVLVLGTPRLGV | Negative |
| O09165 | LLFVLVLGTPRLGVQGEDGL | Negative |
| O09165 | LRLALLFVLVLGTPRLGVQG | Negative |
| O09165 | VSELRLALLFVLVLGTPRLG | Negative |
| O09165 | GARAVSELRLALLFVLVLGT | Negative |
| O09165 | RLGVQGEDGLDFPEYDGVDR | Negative |
| O09165 | ATDRMGARAVSELRLALLFV | Negative |
| O09165 | ELRLALLFVLVLGTPRLGVQ | Negative |
| O09165 | TDRMGARAVSELRLALLFVL | Negative |
| O09165 | LVLGTPRLGVQGEDGLDFPE | Negative |
| O09165 | PRLGVQGEDGLDFPEYDGV  | Negative |
| O09165 | LALLFVLVLGTPRLGVQGED | Negative |
| O09165 | MGARAVSELRLALLFVLVLG | Negative |
| O09165 | DRMGARAVSELRLALLFVLV | Negative |
| O09165 | MRATDRMGARAVSELRLALL | Negative |
| O09165 | GTPRLGVQGEDGLDFPEYDG | Negative |
| O09165 | TPRLGVQGEDGLDFPEYDGV | Negative |
| O09165 | LGVQGEDGLDFPEYDGVDRV | Negative |
| O11780 | LLGRLLPLALALALGPAATH | Negative |
| O11780 | PAATHAGPAKSPYQLVLQHS | Negative |
| O11780 | ALALALGPAATHAGPAKSPY | Negative |
| O11780 | PAKSPYQLVLQHSRLRGRQH | Negative |
| O11780 | AATHAGPAKSPYQLVLQHRS | Negative |
| O11780 | ALGPAATHAGPAKSPYQLVL | Negative |
| O11780 | RLLPLALALALGPAATHAGP | Negative |
| O11780 | KSPYQLVLQHSRLRGRQHGP | Negative |
| O11780 | LGRLLPLALALALGPAATHA | Negative |
| O11780 | PYQLVLQHSRLRGRQHGPNV | Negative |
| O11780 | ALALGPAATHAGPAKSPYQL | Negative |
| O11780 | LGPAATHAGPAKSPYQLVLQ | Negative |
| O11780 | LLPLALALALGPAATHAGPA | Negative |
| O11780 | LALALALGPAATHAGPAKSP | Negative |
| O11780 | ATHAGPAKSPYQLVLQHSRL | Negative |
| O11780 | GRLLPLALALALGPAATHAG | Negative |
| O11780 | ALLGRLLPLALALALGPAAT | Negative |
| O11780 | LALALGPAATHAGPAKSPYQ | Negative |
| O11780 | THAGPAKSPYQLVLQHSRLR | Negative |
| O11780 | AGPAKSPYQLVLQHSRLRGR | Negative |
| O11780 | YQLVLQHSRLRGRQHGPNC  | Negative |
| O11780 | LPLALALALGPAATHAGPAK | Negative |

|        |                       |          |
|--------|-----------------------|----------|
| O11780 | HAGPAKSPYQLVLQHSRLRG  | Negative |
| O11780 | AKSPYQLVLQHSRLRGRQHG  | Negative |
| O11780 | GPAATHAGPAKSPYQLVLQH  | Negative |
| O11780 | SPYQLVLQHSRLRGRQHGN   | Negative |
| O11780 | LALGPAATHAGPAKSPYQLV  | Negative |
| O11780 | MALLGRLLPLALALALGPAA  | Negative |
| O11780 | GPAKSPYQLVLQHSRLRGRQ  | Negative |
| O13547 | ATTLLSSVVSALLSKEVLA   | Negative |
| O13547 | VVSLALLSKEVLATPPACLL  | Negative |
| O13547 | ACLLACVAQVGKSSSTCDSL  | Negative |
| O13547 | KEVLATPPACLLACVAQVGK  | Negative |
| O13547 | LLSSVVSALLSKEVLATPP   | Negative |
| O13547 | ATPPACLLACVAQVGKSSST  | Negative |
| O13547 | LACVAQVGKSSSTCDSLNQV  | Negative |
| O13547 | LSKEVLATPPACLLACVAQV  | Negative |
| O13547 | MRATTLLSSVVSALLSKEV   | Negative |
| O13547 | SKEVLATPPACLLACVAQVG  | Negative |
| O13547 | VSLALLSKEVLATPPACLLA  | Negative |
| O13547 | ALLSKEVLATPPACLLACVA  | Negative |
| O13547 | LATPPACLLACVAQVGKSSS  | Negative |
| O13547 | EVLATPPACLLACVAQVGKS  | Negative |
| O13547 | ACVAQVGKSSSTCDSLNQVT  | Negative |
| O13547 | TPPACLLACVAQVGKSSSTC  | Negative |
| O13547 | TTLSSVVSALLSKEVLAT    | Negative |
| O13547 | SLALLSKEVLATPPACLLAC  | Negative |
| O13547 | LALLSKEVLATPPACLLACV  | Negative |
| O13547 | VLATPPACLLACVAQVGKSS  | Negative |
| O13547 | PACLLACVAQVGKSSSTCDS  | Negative |
| O13547 | SVVSLALLSKEVLATPPACL  | Negative |
| O13547 | PPACLLACVAQVGKSSSTCD  | Negative |
| O13547 | CLLACVAQVGKSSSTCDSL   | Negative |
| O13547 | LLSKEVLATPPACLLACVAQ  | Negative |
| O13547 | RATTLLSSVVSALLSKEVL   | Negative |
| O13547 | LSSVVSALLSKEVLATPPA   | Negative |
| O13547 | TLLSSVVSALLSKEVLATP   | Negative |
| O13547 | LLACVAQVGKSSSTCDSL    | Negative |
| O14412 | IAALSVLGLISKTM AAPA   | Negative |
| O14412 | AALSVLGLISKTM AAPAP   | Negative |
| O14412 | PAPVPGTAWNGSHDVMDFNY  | Negative |
| O14412 | MKSIIISIAALSVLGLISKTM | Negative |
| O14412 | SVLGLISKTM AAPAPVPG   | Negative |
| O14412 | TMAAPAPVPGTAWNGSHD    | Negative |
| O14412 | SIAALSVLGLISKTM AAP   | Negative |
| O14412 | IISIAALSVLGLISKTM AAP | Negative |
| O14412 | LGLISKTM AAPAPVPGTA   | Negative |
| O14412 | GLISKTM AAPAPVPGTAW   | Negative |

|        |                       |          |
|--------|-----------------------|----------|
| O14412 | KSIIISIAALSVLGLISKDMA | Negative |
| O14412 | AAPAPAPVPGTAWNGSHDVM  | Negative |
| O14412 | GTAWNGSHDVMDFNYHESNR  | Negative |
| O14412 | APAPAPVPGTAWNGSHDVM   | Negative |
| O14412 | PAPAPVPGTAWNGSHDVMDF  | Negative |
| O14412 | PGTAWNGSHDVMDFNYHESN  | Negative |
| O14412 | KTMAAPAPAPVPGTAWNGSH  | Negative |
| O14412 | ISKDMAAPAPAPVPGTAWNG  | Negative |
| O14412 | SKDMAAPAPAPVPGTAWNGS  | Negative |
| O14412 | LSVLGLISKDMAAPAPAPVP  | Negative |
| O14412 | ISIAALSVLGLISKDMAAPA  | Negative |
| O14412 | APAPVPGTAWNGSHDVMDFN  | Negative |
| O14412 | SIISIAALSVLGLISKDMAA  | Negative |
| O14412 | MAAPAPAPVPGTAWNGSHDV  | Negative |
| O14412 | VLGLISKDMAAPAPAPVPGT  | Negative |
| O14412 | ALSVLGLISKDMAAPAPAPV  | Negative |
| O14412 | APVPGTAWNGSHDVMDFNYH  | Negative |
| O14412 | VPGTAWNGSHDVMDFNYHES  | Negative |
| O14412 | PVPGTAWNGSHDVMDFNYHE  | Negative |
| O14625 | PMFKRGRCLCIGPGVKAVKV  | Negative |
| O14625 | ALAVILCATVVQGPFPMFKRG | Negative |
| O14625 | MAIALAVILCATVVQGPFPMF | Negative |
| O14625 | FKRGRCLCIGPGVKAVKVAD  | Negative |
| O14625 | MFGRGRCLCIGPGVKAVKVA  | Negative |
| O14625 | VVQGPFPMFKRGRCLCIGPGV | Negative |
| O14625 | VKGMAIALAVILCATVVQGF  | Negative |
| O14625 | VQGPFPMFKRGRCLCIGPGVK | Negative |
| O14625 | GMAIALAVILCATVVQGPFPM | Negative |
| O14625 | VILCATVVQGPFPMFKRGRCL | Negative |
| O14625 | KRGRCLCIGPGVKAVKVADI  | Negative |
| O14625 | CATVVQGPFPMFKRGRCLCIG | Negative |
| O14625 | TVVQGPFPMFKRGRCLCIGPG | Negative |
| O14625 | FPMFKRGRCLCIGPGVKAVK  | Negative |
| O14625 | RGRCLCIGPGVKAVKVADIE  | Negative |
| O14625 | LCATVVQGPFPMFKRGRCLCI | Negative |
| O14625 | IALAVILCATVVQGPFPMFKR | Negative |
| O14625 | RCLCIGPGVKAVKVADIEKA  | Negative |
| O14625 | LAVILCATVVQGPFPMFKRGR | Negative |
| O14625 | ATVVQGPFPMFKRGRCLCIGP | Negative |
| O14625 | QGPFPMFKRGRCLCIGPGVKA | Negative |
| O14625 | MSVKGMAIALAVILCATVVQ  | Negative |
| O14625 | SVKGMAIALAVILCATVVQG  | Negative |
| O14625 | CLCIGPGVKAVKVADIEKAS  | Negative |
| O14625 | KGMAIALAVILCATVVQGFP  | Negative |
| O14625 | GFPMFKRGRCLCIGPGVKAV  | Negative |
| O14625 | GRCLCIGPGVKAVKVADIEK  | Negative |

|        |                      |          |
|--------|----------------------|----------|
| O14625 | ILCATVVQGFPMFKRGRCLC | Negative |
| O14625 | AVILCATVVQGFPMFKRGRC | Negative |
| O14773 | MGLQACLLGLFALILSGKCS | Negative |
| O14773 | LLGLFALILSGKCSYSPEPD | Negative |
| O14773 | TLPPGWVSLGRADPEEELSL | Negative |
| O14773 | RTLPPGWVSLGRADPEEELS | Negative |
| O14773 | QRRTLPPGWVSLGRADPEEE | Negative |
| O14773 | PDQRRTLPPGWVSLGRADPE | Negative |
| O14773 | LFALILSGKCSYSPEPDQRR | Negative |
| O14773 | DQRRTLPPGWVSLGRADPEE | Negative |
| O14773 | LGLFALILSGKCSYSPEPDQ | Negative |
| O14773 | GLQACLLGLFALILSGKCSY | Negative |
| O14773 | QACLLGLFALILSGKCSYSP | Negative |
| O14773 | CSYSPEPDQRRTLPPGWVSL | Negative |
| O14773 | GLFALILSGKCSYSPEPDQR | Negative |
| O14773 | LILSGKCSYSPEPDQRRTL  | Negative |
| O14773 | SPEPDQRRTLPPGWVSLGRA | Negative |
| O14773 | PEPDQRRTLPPGWVSLGRAD | Negative |
| O14773 | SYSPEPDQRRTLPPGWVSLG | Negative |
| O14773 | SGKCSYSPEPDQRRTLPPGW | Negative |
| O14773 | LSGKCSYSPEPDQRRTLPPG | Negative |
| O14773 | YSPEPDQRRTLPPGWVSLGR | Negative |
| O14773 | RRTLPPGWVSLGRADPEEEL | Negative |
| O14773 | GKCSYSPEPDQRRTLPPGWV | Negative |
| O14773 | ILSGKCSYSPEPDQRRTLPP | Negative |
| O14773 | FALILSGKCSYSPEPDQRRT | Negative |
| O14773 | CLLGLFALILSGKCSYSPEP | Negative |
| O14773 | EPDQRRTLPPGWVSLGRADP | Negative |
| O14773 | ALILSGKCSYSPEPDQRRTL | Negative |
| O14773 | LQACLLGLFALILSGKCSYS | Negative |
| O14773 | KCSYSPEPDQRRTLPPGWVS | Negative |
| O14791 | SALFLGVGVRAEEAGARVQQ | Negative |
| O14791 | VSVLCIWMSALFLGVGVRAE | Negative |
| O14791 | EGAALLRVSVLCIWMSALFL | Negative |
| O14791 | SVLCIWMSALFLGVGVRAEE | Negative |
| O14791 | VRAEEAGARVQQNVPSGTD  | Negative |
| O14791 | EEAGARVQQNVPSGTDGDP  | Negative |
| O14791 | LRVSVLCIWMSALFLGVGVR | Negative |
| O14791 | VGVRAGEAGARVQQNVPSGT | Negative |
| O14791 | LCIWMSALFLGVGVRAEEAG | Negative |
| O14791 | MEGAALLRVSVLCIWMSALF | Negative |
| O14791 | AALLRVSVLCIWMSALFLGV | Negative |
| O14791 | GVRAEEAGARVQQNVPSGTD | Negative |
| O14791 | EAGARVQQNVPSGTDGDPQ  | Negative |
| O14791 | ALFLGVGVRAEEAGARVQQN | Negative |
| O14791 | LFLGVGVRAEEAGARVQQNV | Negative |



|        |                       |          |
|--------|-----------------------|----------|
| O14791 | LLRVSVLCIWMSALFLGVGV  | Negative |
| O14791 | RAEEAGARVQQNVPSGTDGTG | Negative |
| O14791 | ALLRVSVLCIWMSALFLGVGV | Negative |
| O14791 | AEEAGARVQQNVPSGTDGTGD | Negative |
| O14791 | IWMSALFLGVGVRAEEAGAR  | Negative |
| O14791 | AGARVQQNVPSGTDGTGDPQS | Negative |
| O14791 | WMSALFLGVGVRAEEAGARV  | Negative |
| O14791 | VLCIWMSALFLGVGVRAEEA  | Negative |
| O14791 | GAALLRVSVLCIWMSALFLG  | Negative |
| O14791 | MSALFLGVGVRAEEAGARVQ  | Negative |
| O14791 | LGVGVRAGEEAGARVQQNVPS | Negative |
| O14791 | GVGVRAEEAGARVQQNVPSG  | Negative |
| O14791 | RVSVCILWMSALFLGVGVRA  | Negative |
| O14791 | FLGVGVRAEEAGARVQQNV   | Negative |
| O14798 | AYSATTARQEEVPQQTVA    | Negative |
| O14798 | ARQEEVPQQTVA          | Negative |
| O14798 | VLAYSATTARQEEVPQQTVA  | Negative |
| O14798 | SATTARQEEVPQQTVA      | Negative |
| O14798 | FVVVIVAVLLPVLAYSATTA  | Negative |
| O14798 | VVIVAVLLPVLAYSATTARQ  | Negative |
| O14798 | LAYSATTARQEEVPQQTVA   | Negative |
| O14798 | PKTLKFVVVIVAVLLPVLAY  | Negative |
| O14798 | KFVVVIVAVLLPVLAYSATT  | Negative |
| O14798 | AVLLPVLAYSATTARQEEVP  | Negative |
| O14798 | LLPVLAYSATTARQEEVPQ   | Negative |
| O14798 | LKFVVVIVAVLLPVLAYSAT  | Negative |
| O14798 | YSATTARQEEVPQQTVA     | Negative |
| O14798 | PVLAYSATTARQEEVPQQT   | Negative |
| O14798 | KTLKFVVVIVAVLLPVLAYS  | Negative |
| O14798 | TLKFVVVIVAVLLPVLAYS   | Negative |
| O14798 | RQEEVPQQTVA           | Negative |
| O14798 | RIPKTLKFVVVIVAVLLPVL  | Negative |
| O14798 | ARIPKTLKFVVVIVAVLLPV  | Negative |
| O14798 | IVAVLLPVLAYSATTARQEE  | Negative |
| O14798 | MARIPKTLKFVVVIVAVLLP  | Negative |
| O14798 | TTARQEEVPQQTVA        | Negative |
| O14798 | VAVLLPVLAYSATTARQEEV  | Negative |
| O14798 | VLLPVLAYSATTARQEEVPQ  | Negative |
| O14798 | ATTARQEEVPQQTVA       | Negative |
| O14798 | VIVAVLLPVLAYSATTARQE  | Negative |
| O14798 | LPVLAYSATTARQEEVPQQT  | Negative |
| O14798 | TARQEEVPQQTVA         | Negative |
| O14798 | IPKTLKFVVVIVAVLLPVLA  | Negative |
| O15467 | VPEWVNTPTCCCLKYYEVL   | Negative |
| O15467 | KVSEAAALLVLLIITSAS    | Negative |
| O15467 | LSLLVLLIITSASRSQPKV   | Negative |

|        |                      |          |
|--------|----------------------|----------|
| O15467 | ASRSQPKVPEWVNTPTCCCL | Negative |
| O15467 | SASRSQPKVPEWVNTPTCC  | Negative |
| O15467 | LLVLILIITSASRSQPKVPE | Negative |
| O15467 | SQPKVPEWVNTPTCCCLKYY | Negative |
| O15467 | VSEAALSLLVLILIITSASR | Negative |
| O15467 | MKVSEAALSLLVLILIITSA | Negative |
| O15467 | IITSASRSQPKVPEWVNTPS | Negative |
| O15467 | ILIITSASRSQPKVPEWVNT | Negative |
| O15467 | AALSLLVLILIITSASRSQP | Negative |
| O15467 | VLILIITSASRSQPKVPEWV | Negative |
| O15467 | ALSLLVLILIITSASRSQPK | Negative |
| O15467 | ITSASRSQPKVPEWVNTPT  | Negative |
| O15467 | EWVNTPTCCCLKYYEKLPR  | Negative |
| O15467 | RSQPKVPEWVNTPTCCCLKY | Negative |
| O15467 | SEAALSLLVLILIITSASRS | Negative |
| O15467 | SRSQPKVPEWVNTPTCCCLK | Negative |
| O15467 | QPKVPEWVNTPTCCCLKYYE | Negative |
| O15467 | LILIITSASRSQPKVPEWVN | Negative |
| O15467 | PKVPEWVNTPTCCCLKYYEK | Negative |
| O15467 | LVLILIITSASRSQPKVPEW | Negative |
| O15467 | EAALSLLVLILIITSASRSQ | Negative |
| O15467 | TSASRSQPKVPEWVNTPTC  | Negative |
| O15467 | LIITSASRSQPKVPEWVNT  | Negative |
| O15467 | KVPEWVNTPTCCCLKYYEKV | Negative |
| O15467 | WVNTPTCCCLKYYEKLPRR  | Negative |
| O15467 | PEWVNTPTCCCLKYYEKLVP | Negative |
| O18330 | LRGESLNKSLPILHEWKFFD | Negative |
| O18330 | TTGNILRGESLNKSLPILHE | Negative |
| O18330 | IVCQGTGNILRGESLNKSL  | Negative |
| O18330 | SLPILHEWKFFDYDFGSDER | Negative |
| O18330 | VCQGTGNILRGESLNKSLP  | Negative |
| O18330 | GESLNKSLPILHEWKFFDYD | Negative |
| O18330 | LGIVCQGTGNILRGESLNK  | Negative |
| O18330 | ESLNKSLPILHEWKFFDYDF | Negative |
| O18330 | NILRGESLNKSLPILHEWKF | Negative |
| O18330 | MLVCLGIVCQGTGNILRGE  | Negative |
| O18330 | QGTGNILRGESLNKSLPIL  | Negative |
| O18330 | MTRLFMLVCLGIVCQGTGN  | Negative |
| O18330 | LFMLVCLGIVCQGTGNILR  | Negative |
| O18330 | CLGIVCQGTGNILRGESLN  | Negative |
| O18330 | CQGTGNILRGESLNKSLPI  | Negative |
| O18330 | TRLFMLVCLGIVCQGTGNI  | Negative |
| O18330 | LNKSLPILHEWKFFDYDFGS | Negative |
| O18330 | RGESLNKSLPILHEWKFFDY | Negative |
| O18330 | TGNILRGESLNKSLPILHEW | Negative |
| O18330 | VCLGIVCQGTGNILRGESL  | Negative |

|        |                      |          |
|--------|----------------------|----------|
| O18330 | GTTGNILRGESLNKSLPILH | Negative |
| O18330 | KSLPILHEWKFFDYDFGSDE | Negative |
| O18330 | RLFMLVCLGIVCQGTGNIL  | Negative |
| O18330 | NKSLPILHEWKFFDYDFGSD | Negative |
| O18330 | LVCLGIVCQGTGNILRGES  | Negative |
| O18330 | ILRGESLNKSLPILHEWKFF | Negative |
| O18330 | GIVCQGTGNILRGESLNKS  | Negative |
| O18330 | GNILRGESLNKSLPILHEWK | Negative |
| O18330 | SLNKSLPILHEWKFFDYDFG | Negative |
| O18994 | NSNLEKMDCYKDVTGTIYDY | Negative |
| O18994 | YLFPLFMAGFVQTNSNLEKM | Negative |
| O18994 | QLGAFYLFPLFMAGFVQTNS | Negative |
| O18994 | EKMDCYKDVTGTIYDYDAFT | Negative |
| O18994 | DCYKDVTGTIYDYDAFTLNG | Negative |
| O18994 | FPLFMAGFVQTNSNLEKMDC | Negative |
| O18994 | MTVQLGAFYLFPLFMAGFVQ | Negative |
| O18994 | PLFMAGFVQTNSNLEKMDCY | Negative |
| O18994 | GFVQTNSNLEKMDCYKDVTG | Negative |
| O18994 | VQTNSNLEKMDCYKDVTGTI | Negative |
| O18994 | LFPLFMAGFVQTNSNLEKMD | Negative |
| O18994 | MDCYKDVTGTIYDYDAFTLN | Negative |
| O18994 | TNSNLEKMDCYKDVTGTIYD | Negative |
| O18994 | FMAGFVQTNSNLEKMDCYKD | Negative |
| O18994 | SNLEKMDCYKDVTGTIYDYD | Negative |
| O18994 | GAFYLFPLFMAGFVQTNSNL | Negative |
| O18994 | FVQTNSNLEKMDCYKDVTGT | Negative |
| O18994 | AGFVQTNSNLEKMDCYKDV  | Negative |
| O18994 | LFMAGFVQTNSNLEKMDCYK | Negative |
| O18994 | QTNSNLEKMDCYKDVTGTIY | Negative |
| O18994 | TVQLGAFYLFPLFMAGFVQT | Negative |
| O18994 | LGAFYLFPLFMAGFVQTNSN | Negative |
| O18994 | NLEKMDCYKDVTGTIYDYDA | Negative |
| O18994 | LEKMDCYKDVTGTIYDYDAF | Negative |
| O18994 | CYKDVTGTIYDYDAFTLNGN | Negative |
| O18994 | KMDCYKDVTGTIYDYDAFTL | Negative |
| O18994 | VQLGAFYLFPLFMAGFVQTN | Negative |
| O18994 | FYLFPLFMAGFVQTNSNLEK | Negative |
| O18994 | MAGFVQTNSNLEKMDCYKDV | Negative |
| O18998 | RSEMLTALLTLAVLLQVAGS | Negative |
| O18998 | GSLKIAAFNIRSFGETKMSN | Negative |
| O18998 | IAAFNIRSFGETKMSNATLT | Negative |
| O18998 | AVLLQVAGSLKIAAFNIRSF | Negative |
| O18998 | VAGSLKIAAFNIRSFGETKM | Negative |
| O18998 | SLKIAAFNIRSFGETKMSNA | Negative |
| O18998 | IRSFGETKMSNATLTSYIVR | Negative |
| O18998 | AAFNIRSFGETKMSNATLTS | Negative |

|        |                        |          |
|--------|------------------------|----------|
| O18998 | LLQVAGSLKIAAFNIRSFGE   | Negative |
| O18998 | AGSLKIAAFNIRSFGETKMS   | Negative |
| O18998 | MRSEMLTALLTLAVLLQVAG   | Negative |
| O18998 | LAVLLQVAGSLKIAAFNIRS   | Negative |
| O18998 | ALLTLAVLLQVAGSLKIAAF   | Negative |
| O18998 | NIRSFGETKMSNATLTSYIV   | Negative |
| O18998 | LQVAGSLKIAAFNIRSFGET   | Negative |
| O18998 | FNIRSFGETKMSNATLTSYI   | Negative |
| O18998 | TLAVLLQVAGSLKIAAFNIR   | Negative |
| O18998 | LKIAAFNIRSFGETKMSNAT   | Negative |
| O18998 | MLTALLTLAVLLQVAGSLKI   | Negative |
| O18998 | RSFGETKMSNATLTSYIVRI   | Negative |
| O18998 | QVAGSLKIAAFNIRSFGETK   | Negative |
| O18998 | AFNIRSFGETKMSNATLTSY   | Negative |
| O18998 | VLLQVAGSLKIAAFNIRSFGE  | Negative |
| O18998 | SEMLTALLTLAVLLQVAGSL   | Negative |
| O18998 | LLTLAVLLQVAGSLKIAAFN   | Negative |
| O18998 | KIAAFNIRSFGETKMSNATL   | Negative |
| O18998 | LTALLTLAVLLQVAGSLKIA   | Negative |
| O18998 | LTLAVLLQVAGSLKIAAFNI   | Negative |
| O18998 | EMLTALLTLAVLLQVAGSLK   | Negative |
| O25825 | LGVLAFAFANALMATDVKALAK | Negative |
| O25825 | ALGVLAFAFANALMATDVKALA | Negative |
| O25825 | ANALMATDVKALAKSCAACH   | Negative |
| O25825 | VKALAKSCAACHGVKFEKKA   | Negative |
| O25825 | ATDVKALAKSCAACHGVKFE   | Negative |
| O25825 | LAFANALMATDVKALAKSCA   | Negative |
| O25825 | MALGVLAFAFANALMATDVKAL | Negative |
| O25825 | KALAKSCAACHGVKFEKKAL   | Negative |
| O25825 | VIMALGVLAFAFANALMATDVK | Negative |
| O25825 | MATDVKALAKSCAACHGVKF   | Negative |
| O25825 | AFANALMATDVKALAKSCAA   | Negative |
| O25825 | CAACHGVKFEKKALGKSKIV   | Negative |
| O25825 | VLAFAFANALMATDVKALAKSC | Negative |
| O25825 | SCAACHGVKFEKKALGKSKI   | Negative |
| O25825 | GVLAFAFANALMATDVKALAKS | Negative |
| O25825 | FANALMATDVKALAKSCAAC   | Negative |
| O25825 | DVKALAKSCAACHGVKFEKK   | Negative |
| O25825 | NALMATDVKALAKSCAACHG   | Negative |
| O25825 | ALMATDVKALAKSCAACHGV   | Negative |
| O25825 | KKVIMALGVLAFAFANALMATD | Negative |
| O25825 | KVIMALGVLAFAFANALMATDV | Negative |
| O25825 | TDVKALAKSCAACHGVKFEK   | Negative |
| O25825 | ALAKSCAACHGVKFEKKALG   | Negative |
| O25825 | LAKSCAACHGVKFEKKALGK   | Negative |
| O25825 | KSCAACHGVKFEKKALGKSK   | Negative |

|        |                      |          |
|--------|----------------------|----------|
| O25825 | AKSCAACHGVKFEKKALGKS | Negative |
| O25825 | MKKVIMALGVLAFAALMAT  | Negative |
| O25825 | AACHGVKFEKKALGKSKIVN | Negative |
| O25825 | LMATDVKALAKSCAACHGVK | Negative |
| O30434 | RSYGNGVYCNSKCVWNWGE  | Negative |
| O30434 | KVDAATRSYGNGVYCNSKC  | Negative |
| O30434 | IGIFGLVVTNFGTKVDAATR | Negative |
| O30434 | GIFGLVVTNFGTKVDAATRS | Negative |
| O30434 | GTKVDAATRSYGNGVYCNS  | Negative |
| O30434 | TKVDAATRSYGNGVYCNSK  | Negative |
| O30434 | FGLVVTNFGTKVDAATRSYG | Negative |
| O30434 | SLALIGIFGLVVTNFGTKVD | Negative |
| O30434 | FSLALIGIFGLVVTNFGTKV | Negative |
| O30434 | RKKLFSALIGIFGLVVTNF  | Negative |
| O30434 | VVTNFGTKVDAATRSYGNGV | Negative |
| O30434 | MRKKLFSALIGIFGLVVTN  | Negative |
| O30434 | LVVTNFGTKVDAATRSYGNG | Negative |
| O30434 | FGTKVDAATRSYGNGVYCNS | Negative |
| O30434 | DAATRSYGNGVYCNSKCVW  | Negative |
| O30434 | AATRSYGNGVYCNSKCVWN  | Negative |
| O30434 | NFGTKVDAATRSYGNGVYCN | Negative |
| O30434 | VDAATRSYGNGVYCNSKCV  | Negative |
| O30434 | GLVVTNFGTKVDAATRSYGN | Negative |
| O30434 | TNFGTKVDAATRSYGNGVYC | Negative |
| O30434 | KKLFSALIGIFGLVVTNFG  | Negative |
| O30434 | LFSALIGIFGLVVTNFGTK  | Negative |
| O30434 | VTNFGTKVDAATRSYGNGVY | Negative |
| O30434 | LIGIFGLVVTNFGTKVDAAT | Negative |
| O30434 | LALIGIFGLVVTNFGTKVDA | Negative |
| O30434 | ATRSYGNGVYCNSKCVWNW  | Negative |
| O30434 | TRSYGNGVYCNSKCVWNWG  | Negative |
| O30434 | ALIGIFGLVVTNFGTKVDAA | Negative |
| O30434 | KLFSALIGIFGLVVTNFGT  | Negative |
| O31737 | LFTIGFPAQQADAAEAPYKA | Negative |
| O31737 | EAPYKASITNISTDGGVYGK | Negative |
| O31737 | APYKASITNISTDGGVYGKI | Negative |
| O31737 | MKKIGLLFMLCLAALFTIGF | Negative |
| O31737 | MLCLAALFTIGFPAQQADAA | Negative |
| O31737 | GLLFMLCLAALFTIGFPAQQ | Negative |
| O31737 | DAAEAPYKASITNISTDGGV | Negative |
| O31737 | LCLAALFTIGFPAQQADAAE | Negative |
| O31737 | QQADAAEAPYKASITNISTD | Negative |
| O31737 | GFPAQQADAAEAPYKASITN | Negative |
| O31737 | ADAAEAPYKASITNISTDGG | Negative |
| O31737 | AEAPYKASITNISTDGGVYG | Negative |
| O31737 | FTIGFPAQQADAAEAPYKAS | Negative |

|        |                      |          |
|--------|----------------------|----------|
| O31737 | FMLCLAALFTIGFPAQQADA | Negative |
| O31737 | KIGLLFMLCLAALFTIGFPA | Negative |
| O31737 | LFMLCLAALFTIGFPAQQAD | Negative |
| O31737 | LLFMLCLAALFTIGFPAQQA | Negative |
| O31737 | PAQQADAAEAPYKASITNIS | Negative |
| O31737 | IGFPAQQADAAEAPYKASIT | Negative |
| O31737 | ALFTIGFPAQQADAAEAPYK | Negative |
| O31737 | TIGFPAQQADAAEAPYKASI | Negative |
| O31737 | AAEAPYKASITNISTDGGVY | Negative |
| O31737 | LAALFTIGFPAQQADAAEAP | Negative |
| O31737 | FPAQQADAAEAPYKASITNI | Negative |
| O31737 | CLAALFTIGFPAQQADAAEA | Negative |
| O31737 | AQQADAAEAPYKASITNIST | Negative |
| O31737 | IGLLFMLCLAALFTIGFPAQ | Negative |
| O31737 | QADAAEAPYKASITNISTDG | Negative |
| O31737 | KKIGLLFMLCLAALFTIGFP | Negative |
| O31803 | FGTLSSGIPGLPAADAQVAK | Negative |
| O31803 | GAVGTAVLFGTLSSGIPGLP | Negative |
| O31803 | GILVKKVLIAGAVGTAVLFG | Negative |
| O31803 | MAKPLSKGGILVKKVLIAGA | Negative |
| O31803 | KVLIAGAVGTAVLFGTLSSG | Negative |
| O31803 | AVLFGTLSSGIPGLPAADAQ | Negative |
| O31803 | VLFGTLSSGIPGLPAADAQV | Negative |
| O31803 | LSKGGILVKKVLIAGAVGTA | Negative |
| O31803 | SKGGILVKKVLIAGAVGTAV | Negative |
| O31803 | KGGILVKKVLIAGAVGTAVL | Negative |
| O31803 | GTLSSGIPGLPAADAQVAKA | Negative |
| O31803 | KPLSKGGILVKKVLIAGAVG | Negative |
| O31803 | IAGAVGTAVLFGTLSSGIPG | Negative |
| O31803 | AGAVGTAVLFGTLSSGIPGL | Negative |
| O31803 | AVGTAVLFGTLSSGIPGLPA | Negative |
| O31803 | TAVLFGTLSSGIPGLPAADA | Negative |
| O31803 | GTAVLFGTLSSGIPGLPAAD | Negative |
| O31803 | GGILVKKVLIAGAVGTAVLF | Negative |
| O31803 | VLIAGAVGTAVLFGTLSSGI | Negative |
| O31803 | VKKVLIAGAVGTAVLFGTLS | Negative |
| O31803 | LVKKVLIAGAVGTAVLFGTL | Negative |
| O31803 | KKVLIAGAVGTAVLFGTLSS | Negative |
| O31803 | LIAGAVGTAVLFGTLSSGIP | Negative |
| O31803 | VGTAFLFGTLSSGIPGLPAA | Negative |
| O31803 | LSSGIPGLPAADAQVAKAAS | Negative |
| O31803 | TLSSGIPGLPAADAQVAKAA | Negative |
| O31803 | PLSKGGILVKKVLIAGAVGT | Negative |
| O31803 | AKPLSKGGILVKKVLIAGAV | Negative |
| O31803 | LFGTLSSGIPGLPAADAQVA | Negative |
| O31803 | ILVKKVLIAGAVGTAVLFGT | Negative |

|        |                       |          |
|--------|-----------------------|----------|
| O33434 | FADPVEDGLVIETDSGPVEI  | Negative |
| O33434 | DPVEDGLVIETDSGPVEIVT  | Negative |
| O33434 | ATALGLALAGAAFADPVEDG  | Negative |
| O33434 | ADPVEDGLVIETDSGPVEIV  | Negative |
| O33434 | TALGLALAGAAFADPVEDGL  | Negative |
| O33434 | PRFTKTKGTLAATALGLALA  | Negative |
| O33434 | GAAFADPVEDGLVIETDSGP  | Negative |
| O33434 | GLALAGAAFADPVEDGLVIE  | Negative |
| O33434 | ALGLALAGAAFADPVEDGLV  | Negative |
| O33434 | LALAGAAFADPVEDGLVIET  | Negative |
| O33434 | ALAGAAFADPVEDGLVIETD  | Negative |
| O33434 | FTKTKGTLAATALGLALAGA  | Negative |
| O33434 | TLAATALGLALAGAAFADPV  | Negative |
| O33434 | RFTKTKGTLAATALGLALAG  | Negative |
| O33434 | VEDGLVIETDSGPVEIVTKT  | Negative |
| O33434 | KTKGTLAATALGLALAGAAF  | Negative |
| O33434 | LAATALGLALAGAAFADPVE  | Negative |
| O33434 | AAFADPVEDGLVIETDSGPV  | Negative |
| O33434 | KGTLAATALGLALAGAAFAD  | Negative |
| O33434 | PVEDGLVIETDSGPVEIVTK  | Negative |
| O33434 | GTLAATALGLALAGAAFADP  | Negative |
| O33434 | AGAAFADPVEDGLVIETDSG  | Negative |
| O33434 | MPRFTKTKGTLAATALGLAL  | Negative |
| O33434 | AFADPVEDGLVIETDSGPVE  | Negative |
| O33434 | EDGLVIETDSGPVEIVTKTA  | Negative |
| O33434 | TKTKGTLAATALGLALAGAA  | Negative |
| O33434 | TKGTLAATALGLALAGAAFA  | Negative |
| O33434 | LAGAAFADPVEDGLVIETDS  | Negative |
| O33434 | LGLALAGAAFADPVEDGLVI  | Negative |
| O33599 | AAETTNTQQAHTQMSTQSQD  | Negative |
| O33599 | TFTMAHQADAAETTNTQQAHT | Negative |
| O33599 | KKLTAAAIATMGFATFTMAH  | Negative |
| O33599 | ATMGFATFTMAHQADAAETT  | Negative |
| O33599 | TNTQQAHTQMSTQSQDVSYG  | Negative |
| O33599 | AAIATMGFATFTMAHQADAA  | Negative |
| O33599 | TTNTQQAHTQMSTQSQDVSY  | Negative |
| O33599 | ATFTMAHQADAAETTNTQQA  | Negative |
| O33599 | AETTNTQQAHTQMSTQSQDV  | Negative |
| O33599 | DAAETTNTQQAHTQMSTQSQ  | Negative |
| O33599 | AIATMGFATFTMAHQADAAE  | Negative |
| O33599 | ETTNTQQAHTQMSTQSQDVS  | Negative |
| O33599 | MAHQADAAETTNTQQAHTQM  | Negative |
| O33599 | AAAIATMGFATFTMAHQADA  | Negative |
| O33599 | LTAAAIATMGFATFTMAHQQA | Negative |
| O33599 | MKKLTAAAIATMGFATFTMA  | Negative |
| O33599 | HQADAAETTNTQQAHTQMST  | Negative |

|        |                       |          |
|--------|-----------------------|----------|
| O33599 | FATFTMAHQADAAETTNTQQ  | Negative |
| O33599 | IATMGFATFTMAHQADAAET  | Negative |
| O33599 | TAAAIATMGFATFTMAHQAD  | Negative |
| O33599 | NTQQAHTQMSTQSQDVSYGT  | Negative |
| O33599 | QADAAETTNTQQAHTQMSTQ  | Negative |
| O33599 | AHQADAAETTNTQQAHTQMS  | Negative |
| O33599 | KLTAAGIATMGFATFTMAHQ  | Negative |
| O33599 | ADAAETTNTQQAHTQMSTQS  | Negative |
| O33599 | GFATFTMAHQADAAETTNTQ  | Negative |
| O33599 | FTMAHQADAAETTNTQQAHT  | Negative |
| O33599 | TMAHQADAAETTNTQQAHTQ  | Negative |
| O33599 | MGFATFTMAHQADAAETTNT  | Negative |
| O33731 | MMSSASFAADETLAEFHVEM  | Negative |
| O33731 | SASFAADETLAEFHVEMGGC  | Negative |
| O33731 | SALFAAGFAVMMMSSASFAA  | Negative |
| O33731 | MSNKLLSALFAAGFAVMMMS  | Negative |
| O33731 | ASFAADETLAEFHVEMGGCE  | Negative |
| O33731 | TLAEFHVEMGGCENCHADGE  | Negative |
| O33731 | FAAGFAVMMMSSASFAADET  | Negative |
| O33731 | LLSALFAAGFAVMMMSSASF  | Negative |
| O33731 | AVMMMSSASFAADETLAEFH  | Negative |
| O33731 | VMMMSSASFAADETLAEFHV  | Negative |
| O33731 | SSASFAADETLAEFHVEMGG  | Negative |
| O33731 | ADETLAEFHVEMGGCENCH   | Negative |
| O33731 | GFAVMMMSSASFAADETLAE  | Negative |
| O33731 | ETLAEFHVEMGGCENCHADG  | Negative |
| O33731 | LFAAGFAVMMMSSASFAADE  | Negative |
| O33731 | LSALFAAGFAVMMMSSASFA  | Negative |
| O33731 | AADETLAEFHVEMGGCENCH  | Negative |
| O33731 | AGFAVMMMSSASFAADETLA  | Negative |
| O33731 | SFAADETLAEFHVEMGGCEN  | Negative |
| O33731 | LAEFHVEMGGCENCHADGEP  | Negative |
| O33731 | FAADETLAEFHVEMGGCENC  | Negative |
| O33731 | MMMSSASFAADETLAEFHVE  | Negative |
| O33731 | NKLLSALFAAGFAVMMMSSA  | Negative |
| O33731 | FAVMMMSSASFAADETLAEF  | Negative |
| O33731 | SNKLLSALFAAGFAVMMMSS  | Negative |
| O33731 | MSSASFAADETLAEFHVEMG  | Negative |
| O33731 | DETLAEFHVEMGGCENCHAD  | Negative |
| O33731 | KLLSALFAAGFAVMMMSSAS  | Negative |
| O33731 | ALFAAGFAVMMMSSASFAAD  | Negative |
| O34214 | ERGERVSVPVSGYSRGEGVT  | Negative |
| O34214 | ELKKVDAVVVGFGWAGAIMA  | Negative |
| O34214 | SGYSRGEGVTVANELLKKVDA | Negative |
| O34214 | MERGERVSVPVSGYSRGEGV  | Negative |
| O34214 | RGERVSVPVSGYSRGEGVTV  | Negative |



|        |                       |          |
|--------|-----------------------|----------|
| O34214 | VSVPVSGYSRGEVTVANEL   | Negative |
| O34214 | GEGVTVANELKKVDAVVVGF  | Negative |
| O34214 | EGVTVANELKKVDAVVVGFG  | Negative |
| O34214 | YSRGEVTVANELKKVDAVV   | Negative |
| O34214 | VTVANELKKVDAVVVGFGWA  | Negative |
| O34214 | DAVVVGFGWAGAIMAKELTE  | Negative |
| O34214 | RGEVTVANELKKVDAVVVG   | Negative |
| O34214 | VSGYSRGEVTVANELKKVD   | Negative |
| O34214 | KVDAVVVGFGWAGAIMAKEL  | Negative |
| O34214 | LKKVDAVVVGFGWAGAIMAK  | Negative |
| O34214 | TVANELKKVDAVVVGFGWAG  | Negative |
| O34214 | VPVSGYSRGEVTVANELKK   | Negative |
| O34214 | VDAVVVGFGWAGAIMAKELT  | Negative |
| O34214 | KKVDAVVVGFGWAGAIMAKE  | Negative |
| O34214 | GYSRGEVTVANELKKVDAV   | Negative |
| O34214 | GERVSVPVSGYSRGEVTV    | Negative |
| O34214 | GTVANELKKVDAVVVGFGW   | Negative |
| O34214 | ERVSVPVSGYSRGEVTVAN   | Negative |
| O34214 | RVSVPVSGYSRGEVTVANE   | Negative |
| O34214 | ANELKKVDAVVVGFGWAGAI  | Negative |
| O34214 | PVSGYSRGEVTVANELKKV   | Negative |
| O34214 | VANELKKVDAVVVGFGWAGA  | Negative |
| O34214 | SRGEVTVANELKKVDAVVV   | Negative |
| O34214 | NELKKVDAVVVGFGWAGAIM  | Negative |
| O34215 | QANDALVKRGEYLARAGDCV  | Negative |
| O34215 | DDQANDALVKRGEYLARAGD  | Negative |
| O34215 | LADDQANDALVKRGEYLARA  | Negative |
| O34215 | AALADDQANDALVKRGEYLA  | Negative |
| O34215 | LVLGTL SFAALADDQANDAL | Negative |
| O34215 | MKSILALVLGTL SFAALADD | Negative |
| O34215 | KRGEYLARAGDCVACHSVKG  | Negative |
| O34215 | FAALADDQANDALVKRGEYL  | Negative |
| O34215 | MMKSILALVLGTL SFAALAD | Negative |
| O34215 | KSILALVLGTL SFAALADDQ | Negative |
| O34215 | NDALVKRGEYLARAGDCVAC  | Negative |
| O34215 | ALADDQANDALVKRGEYLAR  | Negative |
| O34215 | GTL SFAALADDQANDALVKR | Negative |
| O34215 | ANDALVKRGEYLARAGDCVA  | Negative |
| O34215 | ALVKRGEYLARAGDCVACHS  | Negative |
| O34215 | DQANDALVKRGEYLARAGDC  | Negative |
| O34215 | VKRGEYLARAGDCVACHSVK  | Negative |
| O34215 | RGEYLARAGDCVACHSVKGG  | Negative |
| O34215 | TL SFAALADDQANDALVKRG | Negative |
| O34215 | LSFAALADDQANDALVKRGE  | Negative |
| O34215 | LVKRGEYLARAGDCVACHSV  | Negative |
| O34215 | SFAALADDQANDALVKRGEY  | Negative |

|        |                       |          |
|--------|-----------------------|----------|
| O34215 | ADDQANDALVKRGEYLARAG  | Negative |
| O34215 | ALVLGTL SFAALADDQANDA | Negative |
| O34215 | DALVKRGEYLARAGDCVACH  | Negative |
| O34215 | SILALVLGTL SFAALADDQA | Negative |
| O34215 | LALVLGTL SFAALADDQAND | Negative |
| O34215 | VLGTL SFAALADDQANDALV | Negative |
| O34215 | LGTL SFAALADDQANDALVK | Negative |
| O34313 | VENILRILLPPIMILSLILP  | Negative |
| O34313 | ILSLILPTPPIHAEESAAPQ  | Negative |
| O34313 | MILSLILPTPPIHAEESAAP  | Negative |
| O34313 | TPPIHAEESAAPQVHLSILA  | Negative |
| O34313 | RIQKRRTHVENILRILLPPI  | Negative |
| O34313 | ENILRILLPPIMILSLILPT  | Negative |
| O34313 | RTHVENILRILLPPIMILSL  | Negative |
| O34313 | QKRRTHVENILRILLPPIMI  | Negative |
| O34313 | ILRILLPPIMILSLILPTPP  | Negative |
| O34313 | LPPIMILSLILPTPPIHAE   | Negative |
| O34313 | RILLPPIMILSLILPTPPIH  | Negative |
| O34313 | PIMILSLILPTPPIHAEESA  | Negative |
| O34313 | LSLILPTPPIHAEESAAPQV  | Negative |
| O34313 | SLILPTPPIHAEESAAPQVH  | Negative |
| O34313 | LILPTPPIHAEESAAPQVHL  | Negative |
| O34313 | KRRTHVENILRILLPPIMIL  | Negative |
| O34313 | THVENILRILLPPIMILSLI  | Negative |
| O34313 | ILLPPIMILSLILPTPPIHA  | Negative |
| O34313 | LPTPPIHAEESAAPQVHLSI  | Negative |
| O34313 | ILPTPPIHAEESAAPQVHLS  | Negative |
| O34313 | NILRILLPPIMILSLILPTP  | Negative |
| O34313 | PTPPIHAEESAAPQVHLSIL  | Negative |
| O34313 | MRIQKRRTHVENILRILLPP  | Negative |
| O34313 | LLPPIMILSLILPTPPIHAE  | Negative |
| O34313 | LRILLPPIMILSLILPTPPI  | Negative |
| O34313 | HVENILRILLPPIMILSLIL  | Negative |
| O34313 | RRTHVENILRILLPPIMILS  | Negative |
| O34313 | PPIMILSLILPTPPIHAEES  | Negative |
| O34313 | IQKRRTHVENILRILLPPIM  | Negative |
| O34344 | KLLRLLIVSMVTILVFSLVG  | Negative |
| O34344 | VGLSKESSTSAKENHTFSGE  | Negative |
| O34344 | SLVGLSKESSTSAKENHTFS  | Negative |
| O34344 | LLIVSMVTILVFSLVGLSKE  | Negative |
| O34344 | ILVFSLVGLSKESSTSAKEN  | Negative |
| O34344 | SSTSAKENHTFSGEDYFRGL  | Negative |
| O34344 | SMVTILVFSLVGLSKESSTS  | Negative |
| O34344 | SKLLRLLIVSMVTILVFSLV  | Negative |
| O34344 | STSAKENHTFSGEDYFRGLL  | Negative |
| O34344 | LSKESSTSAKENHTFSGEDY  | Negative |

|        |                       |          |
|--------|-----------------------|----------|
| O34344 | SKESSTSAKENHTFSGEDYF  | Negative |
| O34344 | LVFSLVGLSKESSTSAKENH  | Negative |
| O34344 | ESSTSAKENHTFSGEDYFRG  | Negative |
| O34344 | MVTILVFSLVGLSKESSTSA  | Negative |
| O34344 | GLSKESSTSAKENHTFSGED  | Negative |
| O34344 | VSMVTILVFSLVGLSKESST  | Negative |
| O34344 | TILVFSLVGLSKESSTSAKE  | Negative |
| O34344 | LVGLSKESSTSAKENHTFSG  | Negative |
| O34344 | RLLIVSMVTILVFSLVGLSK  | Negative |
| O34344 | IVSMVTILVFSLVGLSKESS  | Negative |
| O34344 | TSAKENHTFSGEDYFRGLLF  | Negative |
| O34344 | FSLVGLSKESSTSAKENHTF  | Negative |
| O34344 | KSKLLRLLIVSMVTILVFSL  | Negative |
| O34344 | LLRLLIVSMVTILVFSLVGL  | Negative |
| O34344 | LIVSMVTILVFSLVGLSKES  | Negative |
| O34344 | LRLIVSMVTILVFSLVGLS   | Negative |
| O34344 | VTILVFSLVGLSKESSTSAK  | Negative |
| O34344 | MKSKLLRLLIVSMVTILVFS  | Negative |
| O34344 | KESSTSAKENHTFSGEDYFR  | Negative |
| O35314 | AMLLGLLGAAALAAVISAPV  | Negative |
| O35314 | AAVISAPVDNRDHNEEMVTR  | Negative |
| O35314 | MQRAMLLGLLGAAALAAVIS  | Negative |
| O35314 | GAAALAAVISAPVDNRDHNE  | Negative |
| O35314 | PVDNRDHNEEMVTRCIEVL   | Negative |
| O35314 | LGAAALAAVISAPVDNRDHN  | Negative |
| O35314 | ISAPVDNRDHNEEMVTRCII  | Negative |
| O35314 | AVISAPVDNRDHNEEMVTRC  | Negative |
| O35314 | VDNRDHNEEMVTRCIEVLS   | Negative |
| O35314 | RDHNEEMVTRCIEVLSNAL   | Negative |
| O35314 | EEMVTRCIEVLSNALSKSS   | Negative |
| O35314 | GLLGAAALAAVISAPVDNRD  | Negative |
| O35314 | QRAMLLGLLGAAALAAVISA  | Negative |
| O35314 | LLGAAALAAVISAPVDNRDH  | Negative |
| O35314 | NEEMVTRCIEVLSNALSKS   | Negative |
| O35314 | HNEEMVTRCIEVLSNALSK   | Negative |
| O35314 | DHNEEMVTRCIEVLSNALS   | Negative |
| O35314 | AAALAAVISAPVDNRDHNEEM | Negative |
| O35314 | RAMLLGLLGAAALAAVISAP  | Negative |
| O35314 | DNRDHNEEMVTRCIEVLSN   | Negative |
| O35314 | MLLGLLGAAALAAVISAPVD  | Negative |
| O35314 | APVDNRDHNEEMVTRCIEV   | Negative |
| O35314 | AAALAAVISAPVDNRDHNEE  | Negative |
| O35314 | LGLLGAAALAAVISAPVDNR  | Negative |
| O35314 | NRDHNEEMVTRCIEVLSNA   | Negative |
| O35314 | ALAAVISAPVDNRDHNEEMV  | Negative |
| O35314 | LAAVISAPVDNRDHNEEMVT  | Negative |

|        |                      |          |
|--------|----------------------|----------|
| O35314 | SAPVDNRDHNEEMVTRCIE  | Negative |
| O35314 | VISAPVDNRDHNEEMVTRCI | Negative |
| O35701 | GRLARASVRRLGTRVPGGSP | Negative |
| O35701 | SAPLRHLPGLLLLLWPLLLL | Negative |
| O35701 | APLRHLPGLLLLLWPLLLLP | Negative |
| O35701 | LLPSLAAPGRLARASVRRL  | Negative |
| O35701 | LLWPLLLLPSLAAPGRLAR  | Negative |
| O35701 | LSAPLRHLPGLLLLLWPLLL | Negative |
| O35701 | HLPGLLLLLWPLLLLPSLAA | Negative |
| O35701 | LWPLLLLPSLAAPGRLARAS | Negative |
| O35701 | LLLLPSLAAPGRLARASVRR | Negative |
| O35701 | MLLSAPLRHLPGLLLLLWPL | Negative |
| O35701 | LLSAPLRHLPGLLLLLWPLL | Negative |
| O35701 | RHLPGLLLLLWPLLLLPSLA | Negative |
| O35701 | LLLWPLLLLPSLAAPGRLA  | Negative |
| O35701 | PGRLARASVRRLGTRVPGGS | Negative |
| O35701 | PLLLLPSLAAPGRLARASVR | Negative |
| O35701 | PLRHLPGLLLLLWPLLLLPS | Negative |
| O35701 | LAAPGRLARASVRRLGTRVP | Negative |
| O35701 | LLPSLAAPGRLARASVRRLG | Negative |
| O35701 | PSLAAPGRLARASVRRLGTR | Negative |
| O35701 | LLWPLLLLPSLAAPGRLARA | Negative |
| O35701 | APGRLARASVRRLGTRVPGG | Negative |
| O35701 | PGLLLLLWPLLLLPSLAAPG | Negative |
| O35701 | AAPGRLARASVRRLGTRVPG | Negative |
| O35701 | LRHLPGLLLLLWPLLLLPSL | Negative |
| O35701 | LPSLAAPGRLARASVRRLGT | Negative |
| O35701 | SLAAPGRLARASVRRLGTRV | Negative |
| O35701 | WPLLLLPSLAAPGRLARASV | Negative |
| O35701 | GLLLLLWPLLLLPSLAAPGR | Negative |
| O35701 | LPGLLLLLWPLLLLPSLAAP | Negative |
| O35744 | LLNVQLGSSYQLMCYYTSPA | Negative |
| O35744 | QLGSSYQLMCYYTSWAKDRP | Negative |
| O35744 | GLAILLNVLGSSYQLMCYY  | Negative |
| O35744 | AILLNVLGSSYQLMCYYTS  | Negative |
| O35744 | LVNLGSSYQLMCYYTSWAK  | Negative |
| O35744 | LGSSYQLMCYYTSWAKDRPI | Negative |
| O35744 | CYYTSWAKDRPIEGSFKPGN | Negative |
| O35744 | MAKLILVTGLAILLNVLGSS | Negative |
| O35744 | NVLGSSYQLMCYYTSWAKD  | Negative |
| O35744 | SSYQLMCYYTSWAKDRPIEG | Negative |
| O35744 | GSSYQLMCYYTSWAKDRPIE | Negative |
| O35744 | KLILVTGLAILLNVLGSSY  | Negative |
| O35744 | SYQLMCYYTSWAKDRPIEGS | Negative |
| O35744 | LAILLNVLGSSYQLMCYYT  | Negative |
| O35744 | AKLILVTGLAILLNVLGSS  | Negative |

|        |                      |          |
|--------|----------------------|----------|
| O35744 | ILVTGLAILLNVQLGSSYQL | Negative |
| O35744 | QLMCYYTSWAKDRPIEGSFK | Negative |
| O35744 | LVTGLAILLNVQLGSSYQLM | Negative |
| O35744 | VQLGSSYQLMCYYTSWAKDR | Negative |
| O35744 | TSWAKDRPIEGSFKPGNIDP | Negative |
| O35744 | MCYYTSWAKDRPIEGSFKPG | Negative |
| O35744 | SWAKDRPIEGSFKPGNIDPC | Negative |
| O35744 | YTSWAKDRPIEGSFKPGNID | Negative |
| O35744 | TGLAILLNVQLGSSYQLMCY | Negative |
| O35744 | LILVTGLAILLNVQLGSSYQ | Negative |
| O35744 | ILLNVQLGSSYQLMCYYTSW | Negative |
| O35744 | LMCYYTSWAKDRPIEGSFKP | Negative |
| O35744 | YYTSWAKDRPIEGSFKPGNI | Negative |
| O35744 | YQLMCYYTSWAKDRPIEGSF | Negative |
| O35806 | LLMGTSHAQRDSVGRYEPAS | Negative |
| O35806 | GFLPLVLALLMGTSHAQRDS | Negative |
| O35806 | SGRIQARWRGFLPLVLALL  | Negative |
| O35806 | VLALLMGTSHAQRDSVGRYE | Negative |
| O35806 | LALLMGTSHAQRDSVGRYEP | Negative |
| O35806 | LPLVLALLMGTSHAQRDSVG | Negative |
| O35806 | APTTVRCSGRIQARWRGFL  | Negative |
| O35806 | ALLMGTSHAQRDSVGRYEPA | Negative |
| O35806 | PLVLALLMGTSHAQRDSVGR | Negative |
| O35806 | GRIQARWRGFLPLVLALLM  | Negative |
| O35806 | TVRCSGRIQARWRGFLPLV  | Negative |
| O35806 | CSGRIQARWRGFLPLVLAL  | Negative |
| O35806 | RIQARWRGFLPLVLALLMG  | Negative |
| O35806 | RGFLPLVLALLMGTSHAQRD | Negative |
| O35806 | LVLALLMGTSHAQRDSVGRY | Negative |
| O35806 | RWRGFLPLVLALLMGTSHAQ | Negative |
| O35806 | QRARWRGFLPLVLALLMGTS | Negative |
| O35806 | TTVRCSGRIQARWRGFLPL  | Negative |
| O35806 | MRAPTTVRCSGRIQARWRG  | Negative |
| O35806 | WRGFLPLVLALLMGTSHAQR | Negative |
| O35806 | PTTVRCSGRIQARWRGFLP  | Negative |
| O35806 | ARWRGFLPLVLALLMGTSHA | Negative |
| O35806 | RCSGRIQARWRGFLPLVLA  | Negative |
| O35806 | IQARWRGFLPLVLALLMG   | Negative |
| O35806 | LMGTSHAQRDSVGRYEPASR | Negative |
| O35806 | VRCSGRIQARWRGFLPLVL  | Negative |
| O35806 | MGTSHAQRDSVGRYEPASRD | Negative |
| O35806 | RARWRGFLPLVLALLMGTSH | Negative |
| O35806 | RAPTTVRCSGRIQARWRGF  | Negative |
| O42257 | MCLDLGYTIRCFITPDVTST | Negative |
| O42257 | RCFITPDVTSTDCPNGHVCY | Negative |
| O42257 | FITPDVTSTDCPNGHVCYTK | Negative |

|        |                       |          |
|--------|-----------------------|----------|
| O42257 | YTIRCFITPDVTSTDCPNHG  | Negative |
| O42257 | LGYTIRCFITPDVTSTDCPN  | Negative |
| O42257 | LDLGYTIRCFITPDVTSTDC  | Negative |
| O42257 | TPDVTSTDCPNGHVCYKTKW  | Negative |
| O42257 | LTLVLVTIMCLDLGYTIRCF  | Negative |
| O42257 | LLTLVLVTIMCLDLGYTIRC  | Negative |
| O42257 | CLDLGYTIRCFITPDVTSTD  | Negative |
| O42257 | LVLVTIMCLDLGYTIRCFIT  | Negative |
| O42257 | TIMCLDLGYTIRCFITPDVT  | Negative |
| O42257 | IRCFITPDVTSTDCPNGHVC  | Negative |
| O42257 | TLLLTLVLVTIMCLDLGYTI  | Negative |
| O42257 | CFITPDVTSTDCPNGHVCYT  | Negative |
| O42257 | LVTIMCLDLGYTIRCFITPD  | Negative |
| O42257 | VLVTIMCLDLGYTIRCFITP  | Negative |
| O42257 | IMCLDLGYTIRCFITPDVTS  | Negative |
| O42257 | MKTLLLTLVLVTIMCLDLGY  | Negative |
| O42257 | DVTSTDCPNGHVCYKTKWCD  | Negative |
| O42257 | DLGYTIRCFITPDVTSTDCP  | Negative |
| O42257 | TIRCFITPDVTSTDCPNGHV  | Negative |
| O42257 | GYTIRCFITPDVTSTDCPNG  | Negative |
| O42257 | VTSTDCPNGHVCYKTKWCDG  | Negative |
| O42257 | PDVTSTDCPNGHVCYKTKWC  | Negative |
| O42257 | ITPDVTSTDCPNGHVCYKTK  | Negative |
| O42257 | KTLLLTLVLVTIMCLDLGYT  | Negative |
| O42257 | VTIMCLDLGYTIRCFITPDV  | Negative |
| O42257 | LLLTLVLVTIMCLDLGYTIR  | Negative |
| O42446 | LLGAFNIKSFGDTKASNATL  | Negative |
| O42446 | LLHLSNSLLLGAFFNIKSFGD | Negative |
| O42446 | MHLVCSLGLFLTLLHLSNSL  | Negative |
| O42446 | MQTYRSRMHLVCSLGLFLTLL | Negative |
| O42446 | QTYRSRMHLVCSLGLFLTLL  | Negative |
| O42446 | LVCSLGLFLTLLHLSNSLLL  | Negative |
| O42446 | LTLHLSNSLLLGAFFNIKS   | Negative |
| O42446 | LLGAFNIKSFGDTKASNAT   | Negative |
| O42446 | SRMHLVCSLGLFLTLLHLSN  | Negative |
| O42446 | LGAFNIKSFGDTKASNATLM  | Negative |
| O42446 | LFLTLLHLSNSLLLGAFFNIK | Negative |
| O42446 | SLLLGAFFNIKSFGDTKASNA | Negative |
| O42446 | RSRMHLVCSLGLFLTLLHLS  | Negative |
| O42446 | LGLFLTLLHLSNSLLLGAFFN | Negative |
| O42446 | GLFLTLLHLSNSLLLGAFFNI | Negative |
| O42446 | VCSLGLFLTLLHLSNSLLLGA | Negative |
| O42446 | SLGLFLTLLHLSNSLLLGAFF | Negative |
| O42446 | TYRSRMHLVCSLGLFLTLLH  | Negative |
| O42446 | TLLHLSNSLLLGAFFNIKSFG | Negative |
| O42446 | RMHLVCSLGLFLTLLHLSNS  | Negative |

|        |                      |          |
|--------|----------------------|----------|
| O42446 | YRSRMHLVCSLGLFLTLLHL | Negative |
| O42446 | FLTLLHLSNSLLLGAFNIS  | Negative |
| O42446 | LSNSLLLGAFNISFGDTKA  | Negative |
| O42446 | HLSNSLLLGAFNISFGDTK  | Negative |
| O42446 | HLVCSLGLFLTLLHLSNSLL | Negative |
| O42446 | NSLLLGAFNISFGDTKASN  | Negative |
| O42446 | SNSLLLGAFNISFGDTKAS  | Negative |
| O42446 | GAFNISFGDTKASNATLMN  | Negative |
| O42446 | LHLSNSLLLGAFNISFGDT  | Negative |
| O42720 | APAFILLGAASAAPGGLAPE | Negative |
| O42720 | ASKRDQPSVGDAFDKYNEAV | Negative |
| O42720 | ILLGAASAAPGGLAPENASK | Negative |
| O42720 | AASAAPGGLAPENASKRDQP | Negative |
| O42720 | LAPENASKRDQPSVGDAFDK | Negative |
| O42720 | KVIAPAFILLGAASAAPGGL | Negative |
| O42720 | PENASKRDQPSVGDAFDKYN | Negative |
| O42720 | GAASAAPGGLAPENASKRDQ | Negative |
| O42720 | LFSKVIAPAFILLGAASAAP | Negative |
| O42720 | LLGAASAAPGGLAPENASKR | Negative |
| O42720 | GGLAPENASKRDQPSVGDAF | Negative |
| O42720 | PGGLAPENASKRDQPSVGDA | Negative |
| O42720 | ENASKRDQPSVGDAFDKYNE | Negative |
| O42720 | LGAASAAPGGLAPENASKRD | Negative |
| O42720 | IAPAFILLGAASAAPGGLAP | Negative |
| O42720 | MLFSKVIAPAFILLGAASAA | Negative |
| O42720 | PAFILLGAASAAPGGLAPEN | Negative |
| O42720 | NASKRDQPSVGDAFDKYNEA | Negative |
| O42720 | AFILLGAASAAPGGLAPENA | Negative |
| O42720 | GLAPENASKRDQPSVGDAFD | Negative |
| O42720 | FILLGAASAAPGGLAPENAS | Negative |
| O42720 | SKVIAPAFILLGAASAAPGG | Negative |
| O42720 | FSKVIAPAFILLGAASAAPG | Negative |
| O42720 | ASAAPGGLAPENASKRDQPS | Negative |
| O42720 | SKRDQPSVGDAFDKYNEAVR | Negative |
| O42720 | APENASKRDQPSVGDAFDKY | Negative |
| O42720 | VIAPAFILLGAASAAPGGLA | Negative |
| O42720 | AAPGGLAPENASKRDQPSVG | Negative |
| O42720 | APGGLAPENASKRDQPSVG  | Negative |
| O42807 | SEDLYNRLVEMATISQAAYA | Negative |
| O42807 | YALILLATAGQALAASTQGI | Negative |
| O42807 | MKQFSAKYALILLATAGQAL | Negative |
| O42807 | LLATAGQALAASTQGISDL  | Negative |
| O42807 | FSAKYALILLATAGQALAAS | Negative |
| O42807 | AKYALILLATAGQALAASTQ | Negative |
| O42807 | ISEDLYNRLVEMATISQAAY | Negative |
| O42807 | AASTQGISDLNRLVEMAT   | Negative |

|        |                      |          |
|--------|----------------------|----------|
| O42807 | DLYNRLVEMATISQAAYADL | Negative |
| O42807 | LILLATAGQALAASTQGISE | Negative |
| O42807 | ATAGQALAASTQGISEDLYN | Negative |
| O42807 | LAASTQGISEDLYNRLVEMA | Negative |
| O42807 | AGQALAASTQGISEDLYNRL | Negative |
| O42807 | QFSAKYALILLATAGQALAA | Negative |
| O42807 | ALAASTQGISEDLYNRLVEM | Negative |
| O42807 | GQALAASTQGISEDLYNRLV | Negative |
| O42807 | GISEDLYNRLVEMATISQAA | Negative |
| O42807 | ALILLATAGQALAASTQGIS | Negative |
| O42807 | QGISEDLYNRLVEMATISQA | Negative |
| O42807 | TAGQALAASTQGISEDLYNR | Negative |
| O42807 | STQGISEDLYNRLVEMATIS | Negative |
| O42807 | LATAGQALAASTQGISEDLY | Negative |
| O42807 | ILLATAGQALAASTQGISED | Negative |
| O42807 | KQFSAKYALILLATAGQALA | Negative |
| O42807 | SAKYALILLATAGQALAAST | Negative |
| O42807 | ASTQGISEDLYNRLVEMATI | Negative |
| O42807 | EDLYNRLVEMATISQAAYAD | Negative |
| O42807 | TQGISEDLYNRLVEMATISQ | Negative |
| O42807 | QALAASTQGISEDLYNRLVE | Negative |
| O43278 | APARTMARARLAPAGIPAVA | Negative |
| O43278 | LGLQGTQAGPPPAPPGLPAG | Negative |
| O43278 | PARTMARARLAPAGIPAVAL | Negative |
| O43278 | CTLGLQGTQAGPPPAPPGLP | Negative |
| O43278 | PAGIPAVALWLLCTLGLQGT | Negative |
| O43278 | WLLCTLGLQGTQAGPPPAPP | Negative |
| O43278 | LQGTQAGPPPAPPGLPAGAD | Negative |
| O43278 | RTMARARLAPAGIPAVALWL | Negative |
| O43278 | PAVALWLLCTLGLQGTQAGP | Negative |
| O43278 | LLCTLGLQGTQAGPPPAPPG | Negative |
| O43278 | VALWLLCTLGLQGTQAGPPP | Negative |
| O43278 | LAPAGIPAVALWLLCTLGLQ | Negative |
| O43278 | ARLAPAGIPAVALWLLCTLG | Negative |
| O43278 | LWLLCTLGLQGTQAGPPPAP | Negative |
| O43278 | RLAPAGIPAVALWLLCTLGL | Negative |
| O43278 | LCTLGLQGTQAGPPPAPPGL | Negative |
| O43278 | RARLAPAGIPAVALWLLCTL | Negative |
| O43278 | MAPARTMARARLAPAGIPAV | Negative |
| O43278 | AGIPAVALWLLCTLGLQGTQ | Negative |
| O43278 | TLGLQGTQAGPPPAPPGLPA | Negative |
| O43278 | MARARLAPAGIPAVALWLLC | Negative |
| O43278 | IPAVALWLLCTLGLQGTQAG | Negative |
| O43278 | AVALWLLCTLGLQGTQAGPP | Negative |
| O43278 | APAGIPAVALWLLCTLGLQG | Negative |
| O43278 | TMARARLAPAGIPAVALWLL | Negative |



|        |                         |          |
|--------|-------------------------|----------|
| O43278 | ARTMARARLAPAGIPAVALW    | Negative |
| O43278 | GLQGTQAGPPPAPPGLPAGA    | Negative |
| O43278 | ARARLAPAGIPAVALWLLCT    | Negative |
| O43278 | GIPAVALWLLCTLGLQGTQA    | Negative |
| O43653 | YSCKAQVSNEDECLQVENCTQ   | Negative |
| O43653 | VSNEDECLQVENCTQLGEQCW   | Negative |
| O43653 | CYSCKAQVSNEDECLQVENCT   | Negative |
| O43653 | VLLALLMAGLALQPGTALLC    | Negative |
| O43653 | LLALLMAGLALQPGTALLCY    | Negative |
| O43653 | AVLLALLMAGLALQPGTALL    | Negative |
| O43653 | LCYSCKAQVSNEDECLQVENC   | Negative |
| O43653 | ALQPGTALLCYSCKAQVSNE    | Negative |
| O43653 | CKAQVSNEDECLQVENCTQLG   | Negative |
| O43653 | TALLCYSCKAQVSNEDECLQV   | Negative |
| O43653 | MAGLALQPGTALLCYSCKAQ    | Negative |
| O43653 | SCKAQVSNEDECLQVENCTQL   | Negative |
| O43653 | PGTALLCYSCKAQVSNEDECL   | Negative |
| O43653 | LLCYSCKAQVSNEDECLQVEN   | Negative |
| O43653 | ALLCYSCKAQVSNEDECLQVE   | Negative |
| O43653 | LALQPGTALLCYSCKAQVSN    | Negative |
| O43653 | LMAGLALQPGTALLCYSCKA    | Negative |
| O43653 | AGLALQPGTALLCYSCKAQV    | Negative |
| O43653 | AQVSNEDECLQVENCTQLGEQ   | Negative |
| O43653 | KAVLLALLMAGLALQPGTAL    | Negative |
| O43653 | LQPGTALLCYSCKAQVSNEDECL | Negative |
| O43653 | KAQVSNEDECLQVENCTQLGE   | Negative |
| O43653 | QVSNEDECLQVENCTQLGEQC   | Negative |
| O43653 | MKAVLLALLMAGLALQPGTA    | Negative |
| O43653 | GTALLCYSCKAQVSNEDECLQ   | Negative |
| O43653 | LLMAGLALQPGTALLCYSCK    | Negative |
| O43653 | QPGTALLCYSCKAQVSNEDECL  | Negative |
| O43653 | GLALQPGTALLCYSCKAQVS    | Negative |
| O43653 | ALLMAGLALQPGTALLCYSC    | Negative |
| O43827 | IVAFVSHPAWLQKLSKHKTP    | Negative |
| O43827 | FVSHPAWLQKLSKHKTPAQ     | Negative |
| O43827 | VAFVSHPAWLQKLSKHKTPA    | Negative |
| O43827 | WLCIFIVAFVSHPAWLQKLS    | Negative |
| O43827 | LSKHKTPAQPQLKAANCCEE    | Negative |
| O43827 | MLKKPLSAVTWLCIFIVAFV    | Negative |
| O43827 | SHPAWLQKLSKHKTPAQPQL    | Negative |
| O43827 | AFVSHPAWLQKLSKHKTPAQ    | Negative |
| O43827 | FIVAFVSHPAWLQKLSKHKT    | Negative |
| O43827 | LSAVTWLCIFIVAFVSHPAW    | Negative |
| O43827 | QKLSKHKTPAQPQLKAANCC    | Negative |
| O43827 | AVTWLCIFIVAFVSHPAWLQ    | Negative |
| O43827 | KPLSAVTWLCIFIVAFVSHP    | Negative |

|        |                       |          |
|--------|-----------------------|----------|
| O43827 | LQKLSKHKTPAQPQLKAANC  | Negative |
| O43827 | KKPLSAVTWLCIFIVAFVSH  | Negative |
| O43827 | SAVTWLCIFIVAFVSHPAWL  | Negative |
| O43827 | HPAWLQKLSKHKTPAQPQLK  | Negative |
| O43827 | KLSKHKTPAQPQLKAANCCE  | Negative |
| O43827 | PAWLQKLSKHKTPAQPQLKA  | Negative |
| O43827 | IFIVAFVSHPAWLQKLSKHK  | Negative |
| O43827 | LKKPLSAVTWLCIFIVAFVS  | Negative |
| O43827 | CIFIVAFVSHPAWLQKLSKH  | Negative |
| O43827 | PLSAVTWLCIFIVAFVSHPA  | Negative |
| O43827 | VSHPAWLQKLSKHKTPAQPQ  | Negative |
| O43827 | TWLCIFIVAFVSHPAWLQKL  | Negative |
| O43827 | AWLQKLSKHKTPAQPQLKAA  | Negative |
| O43827 | VTWLCIFIVAFVSHPAWLQK  | Negative |
| O43827 | WLQKLSKHKTPAQPQLKAAN  | Negative |
| O43827 | SKHKTPAQPQLKAANCCEEV  | Negative |
| O43852 | LMCLSLCTAFALSKPTEKKD  | Negative |
| O43852 | CLSLCTAFALSKPTEKKDRV  | Negative |
| O43852 | PTEKKDRVHHEPQLSDKVHN  | Negative |
| O43852 | DRVHHEPQLSDKVHNDASQF  | Negative |
| O43852 | KKDRVHHEPQLSDKVHNDASQ | Negative |
| O43852 | CTAFALSKPTEKKDRVHHEP  | Negative |
| O43852 | HEPQLSDKVHNDASQFDYDH  | Negative |
| O43852 | LCTAFALSKPTEKKDRVHHE  | Negative |
| O43852 | RVHHEPQLSDKVHNDASQFD  | Negative |
| O43852 | LSKPTEKKDRVHHEPQLSDK  | Negative |
| O43852 | HHEPQLSDKVHNDASQFDYD  | Negative |
| O43852 | RQFLMCLSLCTAFALSKPTE  | Negative |
| O43852 | LSLCTAFALSKPTEKKDRVH  | Negative |
| O43852 | VHHEPQLSDKVHNDASQFDY  | Negative |
| O43852 | AFALSKPTEKKDRVHHEPQL  | Negative |
| O43852 | FLMCLSLCTAFALSKPTEKK  | Negative |
| O43852 | MDLRQFLMCLSLCTAFALSK  | Negative |
| O43852 | TEKKDRVHHEPQLSDKVHND  | Negative |
| O43852 | KDRVHHEPQLSDKVHNDASQ  | Negative |
| O43852 | TAFALSKPTEKKDRVHHEPQ  | Negative |
| O43852 | KPTEKKDRVHHEPQLSDKVH  | Negative |
| O43852 | EKKDRVHHEPQLSDKVHNDAS | Negative |
| O43852 | LRQFLMCLSLCTAFALSKPT  | Negative |
| O43852 | FALSKPTEKKDRVHHEPQLS  | Negative |
| O43852 | SKPTEKKDRVHHEPQLSDKV  | Negative |
| O43852 | MCLSLCTAFALSKPTEKKDR  | Negative |
| O43852 | ALSKPTEKKDRVHHEPQLSD  | Negative |
| O43852 | DLRQFLMCLSLCTAFALSKP  | Negative |
| O43852 | SLCTAFALSKPTEKKDRVHH  | Negative |
| O43866 | ASPSGVRLVGGLHRCEGRVE  | Negative |

|        |                      |          |
|--------|----------------------|----------|
| O43866 | CTRPGFLASPSGVRLVGGLH | Negative |
| O43866 | SGVRLVGGLHRCEGRVEVEQ | Negative |
| O43866 | LLFSLILAICTRPGFLASPS | Negative |
| O43866 | RPGFLASPSGVRLVGGLHRC | Negative |
| O43866 | LASPSGVRLVGGLHRCEGRV | Negative |
| O43866 | AICTRPGFLASPSGVRLVGG | Negative |
| O43866 | ICTRPGFLASPSGVRLVGGL | Negative |
| O43866 | GLHRCEGRVEVEQKGQWGTV | Negative |
| O43866 | GVRLVGGLHRCEGRVEVEQK | Negative |
| O43866 | PSGVRLVGGLHRCEGRVEVE | Negative |
| O43866 | LILAICTRPGFLASPSGVRL | Negative |
| O43866 | MALLFSLILAICTRPGFLAS | Negative |
| O43866 | LHRCEGRVEVEQKGQWGTV  | Negative |
| O43866 | LVGGLHRCEGRVEVEQKGQW | Negative |
| O43866 | SPSGVRLVGGLHRCEGRVEV | Negative |
| O43866 | GGLHRCEGRVEVEQKGQWGT | Negative |
| O43866 | FLASPSGVRLVGGLHRCEGR | Negative |
| O43866 | RLVGGLHRCEGRVEVEQKGQ | Negative |
| O43866 | VGGLHRCEGRVEVEQKGQWG | Negative |
| O43866 | LFSLILAICTRPGFLASPSG | Negative |
| O43866 | GFLASPSGVRLVGGLHRCEG | Negative |
| O43866 | SLILAICTRPGFLASPSGVR | Negative |
| O43866 | ALLFSLILAICTRPGFLASP | Negative |
| O43866 | TRPGFLASPSGVRLVGGLHR | Negative |
| O43866 | LAICTRPGFLASPSGVRLVG | Negative |
| O43866 | VRLVGGLHRCEGRVEVEQKG | Negative |
| O43866 | ILAICTRPGFLASPSGVRLV | Negative |
| O43866 | PGFLASPSGVRLVGGLHRCE | Negative |
| O46162 | CTPGQTKKQDCNTCNCTPTG | Negative |
| O46162 | LALALCAAFLLVVLVQAEQE | Negative |
| O46162 | PGQTKKQDCNTCNCTPTGVW | Negative |
| O46162 | LVVLVQAEQECTPGQTKKQD | Negative |
| O46162 | GQTKKQDCNTCNCTPTGVWA | Negative |
| O46162 | ALALCAAFLLVVLVQAEQEC | Negative |
| O46162 | VQAEQECTPGQTKKQDCNTC | Negative |
| O46162 | AFLLVVLVQAEQECTPGQTK | Negative |
| O46162 | MKLALALCAAFLLVVLVQAE | Negative |
| O46162 | QAEQECTPGQTKKQDCNTCN | Negative |
| O46162 | ECTPGQTKKQDCNTCNCTPT | Negative |
| O46162 | CAAFLLVVLVQAEQECTPGQ | Negative |
| O46162 | ALCAAFLLVVLVQAEQECTP | Negative |
| O46162 | KLALALCAAFLLVVLVQAEQ | Negative |
| O46162 | LVQAEQECTPGQTKKQDCNT | Negative |
| O46162 | LCAAFLLVVLVQAEQECTPG | Negative |
| O46162 | EQECTPGQTKKQDCNTCNCT | Negative |
| O46162 | KKQDCNTCNCTPTGVWACTR | Negative |

|        |                       |          |
|--------|-----------------------|----------|
| O46162 | KQDCNTCNCTPTGVWACTRK  | Negative |
| O46162 | FLLVVLVQAEQECTPGQTKK  | Negative |
| O46162 | VVLVQAEQECTPGQTKKQDC  | Negative |
| O46162 | QECTPGQTKKQDCNTCNCTP  | Negative |
| O46162 | AEQECTPGQTKKQDCNTCNC  | Negative |
| O46162 | TKKQDCNTCNCTPTGVWACT  | Negative |
| O46162 | VLVQAEQECTPGQTKKQDCN  | Negative |
| O46162 | AAFLLVVLVQAEQECTPGQT  | Negative |
| O46162 | TPGQTKKQDCNTCNCTPTGV  | Negative |
| O46162 | LLVVLVQAEQECTPGQTKKQ  | Negative |
| O46162 | QTKKQDCNTCNCTPTGVWAC  | Negative |
| O46167 | ICRARMTNKEYTYKSNVCNN  | Negative |
| O46167 | LPCFFCEPDEICRARMTNKE  | Negative |
| O46167 | KLQLMICLVLLPCFFCEPDE  | Negative |
| O46167 | EICRARMTNKEYTYKSNVCN  | Negative |
| O46167 | ARMTNKEYTYKSNVCNNCGD  | Negative |
| O46167 | FFCEPDEICRARMTNKEYTY  | Negative |
| O46167 | LMICLVLLPCFFCEPDEICR  | Negative |
| O46167 | CFFCEPDEICRARMTNKEYT  | Negative |
| O46167 | VLLPCFFCEPDEICRARMTN  | Negative |
| O46167 | DEICRARMTNKEYTYKSNVC  | Negative |
| O46167 | LVLLPCFFCEPDEICRARMT  | Negative |
| O46167 | CEPDEICRARMTNKEYTYKS  | Negative |
| O46167 | MKLQLMICLVLLPCFFCEPD  | Negative |
| O46167 | QLMICLVLLPCFFCEPDEIC  | Negative |
| O46167 | LLPCFFCEPDEICRARMTNK  | Negative |
| O46167 | KEYTYKSNVCNNCGDQVAAC  | Negative |
| O46167 | PDEICRARMTNKEYTYKSNV  | Negative |
| O46167 | CLVLLPCFFCEPDEICRARM  | Negative |
| O46167 | MICLVLLPCFFCEPDEICRA  | Negative |
| O46167 | FCEPDEICRARMTNKEYTYK  | Negative |
| O46167 | ICLVLLPCFFCEPDEICRAR  | Negative |
| O46167 | CRARMTNKEYTYKSNVCNNC  | Negative |
| O46167 | RARMTNKEYTYKSNVCNNCG  | Negative |
| O46167 | PCFFCEPDEICRARMTNKEF  | Negative |
| O46167 | EPDEICRARMTNKEYTYKSN  | Negative |
| O46167 | RMTNKEYTYKSNVCNNCGDQ  | Negative |
| O46167 | NKEYTYKSNVCNNCGDQVAA  | Negative |
| O46167 | MTNKEYTYKSNVCNNCGDQV  | Negative |
| O46167 | TNKEYTYKSNVCNNCGDQVA  | Negative |
| O46654 | KCPLMVKVLDVAVQGSPAVNV | Negative |
| O46654 | LVTEAGPTGTGQSKCPLMVK  | Negative |
| O46654 | RLLLLCLAGLVLVTEAGPTG  | Negative |
| O46654 | LAGLVLVTEAGPTGTGQSKC  | Negative |
| O46654 | TGQSKCPLMVKVLDVAVQGSP | Negative |
| O46654 | SKCPLMVKVLDVAVQGSPAVN | Negative |

|        |                       |          |
|--------|-----------------------|----------|
| O46654 | CLAGLVLVTEAGPTGTGQSK  | Negative |
| O46654 | AGPTGTGQSKCPLMVKVLD   | Negative |
| O46654 | GTGQSKCPLMVKVLDVQGS   | Negative |
| O46654 | PTGTGQSKCPLMVKVLDVQ   | Negative |
| O46654 | MASRRLLLCLAGLVLVTEA   | Negative |
| O46654 | GQSKCPLMVKVLDVQGS     | Negative |
| O46654 | GPTGTGQSKCPLMVKVLD    | Negative |
| O46654 | LLCLAGLVLVTEAGPTGTGQ  | Negative |
| O46654 | EAGPTGTGQSKCPLMVKVLD  | Negative |
| O46654 | QSKCPLMVKVLDVQGS      | Negative |
| O46654 | RRLLLCLAGLVLVTEAGPT   | Negative |
| O46654 | CPLMVKVLDVQGS         | Negative |
| O46654 | AGLVLVTEAGPTGTGQSKCP  | Negative |
| O46654 | GLVLVTEAGPTGTGQSKCPL  | Negative |
| O46654 | LCLAGLVLVTEAGPTGTGQS  | Negative |
| O46654 | VTEAGPTGTGQSKCPLMVKV  | Negative |
| O46654 | SRRLLLCLAGLVLVTEAGP   | Negative |
| O46654 | TGTGQSKCPLMVKVLDVQGS  | Negative |
| O46654 | VLVTEAGPTGTGQSKCPLMV  | Negative |
| O46654 | TEAGPTGTGQSKCPLMVKV   | Negative |
| O46654 | ASRRLLLCLAGLVLVTEAG   | Negative |
| O46654 | LVLVTEAGPTGTGQSKCPLM  | Negative |
| O46654 | LLLCLAGLVLVTEAGPTGTG  | Negative |
| O46655 | ALAPALNLPGLATCPELSSS  | Negative |
| O46655 | APALNLPGLATCPELSSSSE  | Negative |
| O46655 | ALALAPALNLPGLATCPELS  | Negative |
| O46655 | LALALIALEAALALAPALNL  | Negative |
| O46655 | SLALALIALEAALALAPALN  | Negative |
| O46655 | LTSLALALIALEAALALAPA  | Negative |
| O46655 | ATCPELSSSSEDPCVISCVN  | Negative |
| O46655 | ALIALEAALALAPALNLPGL  | Negative |
| O46655 | RFLTSLALALIALEAALALA  | Negative |
| O46655 | MRFLTSLALALIALEAALAL  | Negative |
| O46655 | ALNLPGLATCPELSSSSEDP  | Negative |
| O46655 | LALAPALNLPGLATCPELSS  | Negative |
| O46655 | LALIALEAALALAPALNLPGL | Negative |
| O46655 | IALEAALALAPALNLPGLAT  | Negative |
| O46655 | ALEAALALAPALNLPGLATC  | Negative |
| O46655 | LNLPGLATCPELSSSSEDPC  | Negative |
| O46655 | LPGLATCPELSSSSEDPCVI  | Negative |
| O46655 | AALALAPALNLPGLATCPEL  | Negative |
| O46655 | GLATCPELSSSSEDPCVISC  | Negative |
| O46655 | NLPGLATCPELSSSSEDPCV  | Negative |
| O46655 | LATCPELSSSSEDPCVISCV  | Negative |
| O46655 | ALALIALEAALALAPALNLP  | Negative |
| O46655 | LEAALALAPALNLPGLATCP  | Negative |

|        |                       |          |
|--------|-----------------------|----------|
| O46655 | LAPALNLPGLATCPELSSSS  | Negative |
| O46655 | PALNLPGLATCPELSSSSED  | Negative |
| O46655 | PGLATCPELSSSSEDPCVIS  | Negative |
| O46655 | FLTSLALALIALEAALALAP  | Negative |
| O46655 | EAALALAPALNLPGLATCPE  | Negative |
| O46655 | LIALEAALALAPALNLPGLA  | Negative |
| O48540 | RSCICGLFLLFLALVCEANS  | Negative |
| O48540 | SGFIGVKDSHFELNGSPFLF  | Negative |
| O48540 | RRSCICGLFLLFLALVCEAN  | Negative |
| O48540 | LFLALVCEANSFIGVKDSH   | Negative |
| O48540 | SCICGLFLLFLALVCEANS   | Negative |
| O48540 | SYARRSCICGLFLLFLALVC  | Negative |
| O48540 | FLLFLALVCEANSFIGVKD   | Negative |
| O48540 | GFIGVKDSHFELNGSPFLFN  | Negative |
| O48540 | MSYARRSCICGLFLLFLALV  | Negative |
| O48540 | LLFLALVCEANSFIGVKDS   | Negative |
| O48540 | LVCEANSFIGVKDSHFELN   | Negative |
| O48540 | FLALVCEANSFIGVKDSHF   | Negative |
| O48540 | LALVCEANSFIGVKDSHFE   | Negative |
| O48540 | CEANSFIGVKDSHFELNGS   | Negative |
| O48540 | EANSFIGVKDSHFELNGSP   | Negative |
| O48540 | LFLFLALVCEANSFIGVK    | Negative |
| O48540 | CICGLFLLFLALVCEANS    | Negative |
| O48540 | IGVKDSHFELNGSPFLN     | Negative |
| O48540 | ARRSCICGLFLLFLALVCEA  | Negative |
| O48540 | NSGFIGVKDSHFELNGSPFL  | Negative |
| O48540 | ANSFIGVKDSHFELNGSPF   | Negative |
| O48540 | FIGVKDSHFELNGSPFLN    | Negative |
| O48540 | ALVCEANSFIGVKDSHFEL   | Negative |
| O48540 | CGLFLLFLALVCEANS      | Negative |
| O48540 | YARRSCICGLFLLFLALVCE  | Negative |
| O48540 | VKDSHFELNGSPFLN       | Negative |
| O48540 | GVKDSHFELNGSPFLN      | Negative |
| O48540 | GLFLLFLALVCEANS       | Negative |
| O48540 | VCEANSFIGVKDSHFELNG   | Negative |
| O48818 | ILFTTFVLFLSLADARIPGIY | Negative |
| O48818 | FVLFLSLADARIPGIYSGGAW | Negative |
| O48818 | AWQNAHATFYGGSDASGTMG  | Negative |
| O48818 | KLAILFTTFVLFLSLADARIP | Negative |
| O48818 | YSGGAWQNAHATFYGGSDAS  | Negative |
| O48818 | GAWQNAHATFYGGSDASGTM  | Negative |
| O48818 | LFTTFVLFLSLADARIPGIYS | Negative |
| O48818 | ADARIPGIYSGGAWQNAHAT  | Negative |
| O48818 | DARIPGIYSGGAWQNAHATF  | Negative |
| O48818 | IYSGGAWQNAHATFYGGSDA  | Negative |
| O48818 | FSLADARIPGIYSGGAWQNA  | Negative |

|        |                        |          |
|--------|------------------------|----------|
| O48818 | TTFVLFLSLADARIPGIYSGG  | Negative |
| O48818 | LFLSLADARIPGIYSGGAWQN  | Negative |
| O48818 | MAIKLAILFTTTFVLFLSLADA | Negative |
| O48818 | PGIYSGGAWQNAHATFYGGS   | Negative |
| O48818 | AIKLAILFTTTFVLFLSLADAR | Negative |
| O48818 | GGAWQNAHATFYGGSDASGT   | Negative |
| O48818 | VLFLSLADARIPGIYSGGAWQ  | Negative |
| O48818 | LADARIPGIYSGGAWQNAHA   | Negative |
| O48818 | LAILFTTTFVLFLSLADARIPG | Negative |
| O48818 | ARIPGIYSGGAWQNAHATFY   | Negative |
| O48818 | TFVLFLSLADARIPGIYSGGA  | Negative |
| O48818 | RIPGIYSGGAWQNAHATFYG   | Negative |
| O48818 | IKLAILFTTTFVLFLSLADARI | Negative |
| O48818 | FTTFVLFLSLADARIPGIYSG  | Negative |
| O48818 | IPGIYSGGAWQNAHATFYGG   | Negative |
| O48818 | GIYSGGAWQNAHATFYGGSD   | Negative |
| O48818 | SGGAWQNAHATFYGGSDASG   | Negative |
| O48818 | SLADARIPGIYSGGAWQNAH   | Negative |
| O50319 | TLMLFSFGTLGQETASGQVG   | Negative |
| O50319 | GTLGQETASGQVGDVSSSTI   | Negative |
| O50319 | SFGTLGQETASGQVGDVSSS   | Negative |
| O50319 | VLTLMLFSFGTLGQETASGQ   | Negative |
| O50319 | LFSFGTLGQETASGQVGDVS   | Negative |
| O50319 | VGDVSSSTIATEVSEAECGT   | Negative |
| O50319 | VSSSTIATEVSEAECGTQSA   | Negative |
| O50319 | QETASGQVGDVSSSTIATEV   | Negative |
| O50319 | ETASGQVGDVSSSTIATEVS   | Negative |
| O50319 | TASGQVGDVSSSTIATEVSE   | Negative |
| O50319 | KIVFVLTLMLFSFGTLGQET   | Negative |
| O50319 | TLGQETASGQVGDVSSSTIA   | Negative |
| O50319 | LTLMLFSFGTLGQETASGQV   | Negative |
| O50319 | QVGDVSSSTIATEVSEAECG   | Negative |
| O50319 | GQETASGQVGDVSSSTIATE   | Negative |
| O50319 | LMLFSFGTLGQETASGQVGD   | Negative |
| O50319 | MLFSFGTLGQETASGQVGDV   | Negative |
| O50319 | FGTLGQETASGQVGDVSSST   | Negative |
| O50319 | FSFGTLGQETASGQVGDVSS   | Negative |
| O50319 | MKKIVFVLTLMLFSFGTLGQ   | Negative |
| O50319 | DVSSSTIATEVSEAECGTQS   | Negative |
| O50319 | IVFVLTLMLFSFGTLGQETA   | Negative |
| O50319 | GQVGDVSSSTIATEVSEAEC   | Negative |
| O50319 | SGQVGDVSSSTIATEVSEAE   | Negative |
| O50319 | ASGQVGDVSSSTIATEVSEA   | Negative |
| O50319 | GDVSSSTIATEVSEAECGTQ   | Negative |
| O50319 | KKIVFVLTLMLFSFGTLGQE   | Negative |
| O50319 | LGQETASGQVGDVSSSTIAT   | Negative |

|        |                       |          |
|--------|-----------------------|----------|
| O50319 | FVLTLMLFSFGTLGQETASG  | Negative |
| O52055 | TMKRLLL VSTLAGASALATL | Negative |
| O52055 | LAGASALATLPANAFWGWNP  | Negative |
| O52055 | NAFWGWNPFGWGGGPWDGPW  | Negative |
| O52055 | ASALATLPANAFWGWNPF    | Negative |
| O52055 | PANAFWGWNPFGWGGGPWDG  | Negative |
| O52055 | AFWGWNPFGWGGGPWDGPWG  | Negative |
| O52055 | LATLPANAFWGWNPF       | Negative |
| O52055 | AGASALATLPANAFWGWNPF  | Negative |
| O52055 | WNPFGWGGGPWDGPWG      | Negative |
| O52055 | GWNPFGWGGGPWDGPWG     | Negative |
| O52055 | GASALATLPANAFWGWNPF   | Negative |
| O52055 | ANAFWGWNPFGWGGGPWDGP  | Negative |
| O52055 | NPFGWGGGPWDGPWG       | Negative |
| O52055 | STLAGASALATLPANAFWG   | Negative |
| O52055 | LLVSTLAGASALATLPANAF  | Negative |
| O52055 | KRLLL VSTLAGASALATLPA | Negative |
| O52055 | RLLL VSTLAGASALATLPAN | Negative |
| O52055 | MTMKRLLL VSTLAGASALAT | Negative |
| O52055 | FWGWNPFGWGGGPWDGPWG   | Negative |
| O52055 | ALATLPANAFWGWNPF      | Negative |
| O52055 | TLPANAFWGWNPFGWGGGPW  | Negative |
| O52055 | LPANAFWGWNPFGWGGGPWD  | Negative |
| O52055 | SALATLPANAFWGWNPF     | Negative |
| O52055 | WGWNPFGWGGGPWDGPWG    | Negative |
| O52055 | ATLPANAFWGWNPFGWGGGP  | Negative |
| O52055 | MKRLLL VSTLAGASALATLP | Negative |
| O52055 | VSTLAGASALATLPANAFWG  | Negative |
| O52055 | LVSTLAGASALATLPANAFW  | Negative |
| O52055 | LLL VSTLAGASALATLPANA | Negative |
| O52057 | FSASAWWGPGYGNGLWDNM   | Negative |
| O52057 | PGYGNGLWDNMGDMFGDGYG  | Negative |
| O52057 | AWWGPGYGNGLWDNMGDMF   | Negative |
| O52057 | ITACALAALFAGASFSASAW  | Negative |
| O52057 | ALFAGASFSASAWWGPGYG   | Negative |
| O52057 | MIKSNRITACALAALFAGAS  | Negative |
| O52057 | IKSNRITACALAALFAGASF  | Negative |
| O52057 | ACALAALFAGASFSASAWWG  | Negative |
| O52057 | SAWWGPGYGNGLWDNMGDM   | Negative |
| O52057 | CALAALFAGASFSASAWWG   | Negative |
| O52057 | GASFSASAWWGPGYGNGLW   | Negative |
| O52057 | RITACALAALFAGASFSASA  | Negative |
| O52057 | GPGYGNGLWDNMGDMFGDGY  | Negative |
| O52057 | WWGPGYGNGLWDNMGDMFG   | Negative |
| O52057 | AALFAGASFSASAWWGPGY   | Negative |
| O52057 | NRITACALAALFAGASFSAS  | Negative |



|        |                      |          |
|--------|----------------------|----------|
| O52057 | LFAGASFSASAWWGGPGYGN | Negative |
| O52057 | TACALAALFAGASFSASAWW | Negative |
| O52057 | WGGPGYGNGLWDNMGDMFGD | Negative |
| O52057 | GGPGYGNGLWDNMGDMFGDG | Negative |
| O52057 | SNRITACALAALFAGASFSA | Negative |
| O52057 | SFSASAWWGGPGYGNGLWDN | Negative |
| O52057 | ASFSASAWWGGPGYGNGLWD | Negative |
| O52057 | KSNRITACALAALFAGASFS | Negative |
| O52057 | ASAWWGGPGYGNGLWDNMGD | Negative |
| O52057 | FAGASFSASAWWGGPGYGN  | Negative |
| O52057 | AGASFSASAWWGGPGYGNGL | Negative |
| O52057 | SASAWWGGPGYGNGLWDNMG | Negative |
| O52057 | LAALFAGASFSASAWWGGPG | Negative |
| O52179 | GGPGYGSMDWMDMFGDG    | Negative |
| O52179 | MKKLATAAVAALLGASASA  | Negative |
| O52179 | SASASAWWGPWGPGYGS    | Negative |
| O52179 | ASASAWWGPWGPGYGSMD   | Negative |
| O52179 | GWGGPGYGSMDWMDMFG    | Negative |
| O52179 | KLATAAAVAALLGASASASA | Negative |
| O52179 | GPGYGSMDWMDMFGDGY    | Negative |
| O52179 | LGASASASAWWGPWGPGY   | Negative |
| O52179 | VAALLGASASASAWWGPWG  | Negative |
| O52179 | SASAWWGPWGPGYGSMD    | Negative |
| O52179 | ALLGASASASAWWGPWGPG  | Negative |
| O52179 | GASASASAWWGPWGPGY    | Negative |
| O52179 | WGGPGYGSMDWMDMFGD    | Negative |
| O52179 | GPGWGPGYGSMDWMDM     | Negative |
| O52179 | AALLGASASASAWWGPWG   | Negative |
| O52179 | SAWWGPWGPGYGSMDW     | Negative |
| O52179 | AAVAALLGASASASAWWGP  | Negative |
| O52179 | WWGPWGPGYGSMDWMD     | Negative |
| O52179 | PGWGPGYGSMDWMDMF     | Negative |
| O52179 | AWWGPWGPGYGSMDWMD    | Negative |
| O52179 | TAAVAALLGASASASAWWG  | Negative |
| O52179 | LLGASASASAWWGPWGPG   | Negative |
| O52179 | ASAWWGPWGPGYGSMD     | Negative |
| O52179 | ASASASAWWGPWGPGYGS   | Negative |
| O52179 | LATAAAVAALLGASASASAW | Negative |
| O52179 | ATAAAVAALLGASASASAWW | Negative |
| O52179 | AAVAALLGASASASAWWGP  | Negative |
| O52179 | WGPWGPGYGSMDWMD      | Negative |
| O52179 | KKLATAAVAALLGASASAS  | Negative |
| O54081 | QESRANTNIENIGDGA     | Negative |
| O54081 | IAPLASPIQESRANTNI    | Negative |
| O54081 | VGLIAPLASPIQESRANTNI | Negative |
| O54081 | SPIQESRANTNIENIGDGA  | Negative |

|        |                      |          |
|--------|----------------------|----------|
| O54081 | LSVGLIAPLASPIQESRANT | Negative |
| O54081 | KKMLAASLSVGLIAPLASPI | Negative |
| O54081 | APLASPIQESRANTNIENIG | Negative |
| O54081 | SLSVGLIAPLASPIQESRAN | Negative |
| O54081 | KKKMLAASLSVGLIAPLASP | Negative |
| O54081 | SVGLIAPLASPIQESRANTN | Negative |
| O54081 | IQESRANTNIENIGDGAEVI | Negative |
| O54081 | MLAASLSVGLIAPLASPIQE | Negative |
| O54081 | KMLAASLSVGLIAPLASPIQ | Negative |
| O54081 | LAASLSVGLIAPLASPIQES | Negative |
| O54081 | ASPIQESRANTNIENIGDGA | Negative |
| O54081 | SRANTNIENIGDGAEVIKRT | Negative |
| O54081 | TNIENIGDGAEVIKRTEDVS | Negative |
| O54081 | LIAPLASPIQESRANTNIEN | Negative |
| O54081 | ANTNIENIGDGAEVIKRTED | Negative |
| O54081 | NTNIENIGDGAEVIKRTEDV | Negative |
| O54081 | ASLSVGLIAPLASPIQESRA | Negative |
| O54081 | PIQESRANTNIENIGDGAEV | Negative |
| O54081 | ESRANTNIENIGDGAEVIKR | Negative |
| O54081 | RANTNIENIGDGAEVIKRTE | Negative |
| O54081 | FKKKMLAASLSVGLIAPLAS | Negative |
| O54081 | LASPIQESRANTNIENIGDG | Negative |
| O54081 | MFKKKMLAASLSVGLIAPLA | Negative |
| O54081 | PLASPIQESRANTNIENIGD | Negative |
| O54081 | AASLSVGLIAPLASPIQESR | Negative |
| O54082 | SSVASSIALLLLSNTVDAAQ | Negative |
| O54082 | LLLSNTVDAAQNITPKREKK | Negative |
| O54082 | ITPKREKKVDDKITLYKTTA | Negative |
| O54082 | KSSVASSIALLLLSNTVDAA | Negative |
| O54082 | NTVDAAQNITPKREKKVDDK | Negative |
| O54082 | VDAAQNITPKREKKVDDKIT | Negative |
| O54082 | ALLLSNTVDAAQNITPKRE  | Negative |
| O54082 | QNITPKREKKVDDKITLYKT | Negative |
| O54082 | SSIALLLLSNTVDAAQNITP | Negative |
| O54082 | VASSIALLLLSNTVDAAQNI | Negative |
| O54082 | KLKGSSVASSIALLLLSNTV | Negative |
| O54082 | LLSNTVDAAQNITPKREKKV | Negative |
| O54082 | DAAQNITPKREKKVDDKITL | Negative |
| O54082 | IEKLKGSSVASSIALLLLSN | Negative |
| O54082 | AAQNITPKREKKVDDKITLY | Negative |
| O54082 | LSNTVDAAQNITPKREKKVD | Negative |
| O54082 | EKLKGSSVASSIALLLLSNT | Negative |
| O54082 | SIALLLLSNTVDAAQNITPK | Negative |
| O54082 | MKIEKLKGSSVASSIALLLL | Negative |
| O54082 | NITPKREKKVDDKITLYKTT | Negative |
| O54082 | GKSSVASSIALLLLSNTVDA | Negative |

|        |                       |          |
|--------|-----------------------|----------|
| O54082 | KIEKLGKSSVASSIALLLLS  | Negative |
| O54082 | SNTVDAAQNITPKREKKVDD  | Negative |
| O54082 | SVASSIALLLLSNTVDAAQN  | Negative |
| O54082 | AQNITPKREKKVDDKITLYK  | Negative |
| O54082 | LLLLSNTVDAAQNITPKREK  | Negative |
| O54082 | TVDAAQNITPKREKKVDDKI  | Negative |
| O54082 | IALLLSNTVDAAQNITPKR   | Negative |
| O54082 | LGKSSVASSIALLLLSNTVD  | Negative |
| O55038 | ILEAHYTNLKCRCSGVISTV  | Negative |
| O55038 | MRLSTATLLLLLASCLSPGH  | Negative |
| O55038 | TNLKCRCSGVISTVVGLNII  | Negative |
| O55038 | LSTATLLLLLASCLSPGHGI  | Negative |
| O55038 | HYTNLKCRCSGVISTVVGLN  | Negative |
| O55038 | SCLSPGHGILEAHYTNLKCR  | Negative |
| O55038 | CLSPGHGILEAHYTNLKCRC  | Negative |
| O55038 | NLKRCRCSGVISTVVGLNIID | Negative |
| O55038 | GHGILEAHYTNLKCRCSGVI  | Negative |
| O55038 | AHYTNLKCRCSGVISTVVGL  | Negative |
| O55038 | RLSTATLLLLLASCLSPGHG  | Negative |
| O55038 | LLASCLSPGHGILEAHYTN   | Negative |
| O55038 | LEAHYTNLKCRCSGVISTVV  | Negative |
| O55038 | LLLLLASCLSPGHGILEAHY  | Negative |
| O55038 | EAHYTNLKCRCSGVISTVVG  | Negative |
| O55038 | HGILEAHYTNLKCRCSGVIS  | Negative |
| O55038 | LSPGHGILEAHYTNLKRCRC  | Negative |
| O55038 | GILEAHYTNLKCRCSGVIST  | Negative |
| O55038 | LASCLSPGHGILEAHYTNLK  | Negative |
| O55038 | SPGHGILEAHYTNLKRCRCG  | Negative |
| O55038 | STATLLLLLASCLSPGHGIL  | Negative |
| O55038 | TATLLLLLASCLSPGHGILE  | Negative |
| O55038 | PGHGILEAHYTNLKCRCSGV  | Negative |
| O55038 | LLLLASCLSPGHGILEAHYT  | Negative |
| O55038 | YTNLKCRCSGVISTVVGLNI  | Negative |
| O55038 | ATLLLLLASCLSPGHGILEA  | Negative |
| O55038 | ASCLSPGHGILEAHYTNLK   | Negative |
| O55038 | LKCRCSGVISTVVGLNIIDR  | Negative |
| O55038 | LLASCLSPGHGILEAHYTNL  | Negative |
| O55232 | STKVPWAAVTLLLLLLLPPA  | Negative |
| O55232 | LLPPALLSLGVDAQPLPDC   | Negative |
| O55232 | LLPPALLSLGVDAQPLPDCC  | Negative |
| O55232 | PPALLSLGVDAQPLPDCCRQ  | Negative |
| O55232 | VDAQPLPDCCRQKTCSCRLY  | Negative |
| O55232 | LLLLLLPPALLSLGVDAQPL  | Negative |
| O55232 | PWAAVTLLLLLLLPPALLSL  | Negative |
| O55232 | TLLLLLLLPPALLSLGVDAQ  | Negative |
| O55232 | LSLGVDAQPLPDCCRQKTCS  | Negative |

|        |                        |          |
|--------|------------------------|----------|
| O55232 | LLSLGVDAQPLPDCCRQKTC   | Negative |
| O55232 | WAAVTLLLLLLLPPALLSLG   | Negative |
| O55232 | LLLLLPPALLSLGVDAQPLP   | Negative |
| O55232 | SLGVDAQPLPDCCRQKTCSC   | Negative |
| O55232 | KVPWAAVTLLLLLLLPPALL   | Negative |
| O55232 | VTLLLLLLLPPALLSLGVDA   | Negative |
| O55232 | AVTLLLLLLLPPALLSLGVD   | Negative |
| O55232 | PALLSLGVDAQPLPDCCRQK   | Negative |
| O55232 | ALLSLGVDAQPLPDCCRQKT   | Negative |
| O55232 | LGVD AQPLPDCCRQKTCSCR  | Negative |
| O55232 | VPWAAVTLLLLLLLPPALLS   | Negative |
| O55232 | MNLPSTKVPWAAVTLLLLLL   | Negative |
| O55232 | LPPALLSLGVDAQPLPDCCR   | Negative |
| O55232 | GVDAQPLPDCCRQKTCSCRL   | Negative |
| O55232 | PSTKVPWAAVTLLLLLLLPP   | Negative |
| O55232 | LLLLLLLPPALLSLGVDAQP   | Negative |
| O55232 | NLPSTKVPWAAVTLLLLLLL   | Negative |
| O55232 | LPSTKVPWAAVTLLLLLLLP   | Negative |
| O55232 | TKVPWAAVTLLLLLLLPPAL   | Negative |
| O55232 | AAVTLLLLLLLPPALLSLGV   | Negative |
| O55245 | APLVSHGSIDSKCPLMVKVL   | Negative |
| O55245 | HSMLLVFLAGLVFLTEAAPL   | Negative |
| O55245 | LVSHGSIDSKCPLMVKVLD A  | Negative |
| O55245 | FLAGLVFLTEAAPLVSHGSI   | Negative |
| O55245 | VSHGSIDSKCPLMVKVLD A V | Negative |
| O55245 | FLTEAAPLVSHGSIDSKCPL   | Negative |
| O55245 | SMLLVFLAGLVFLTEAAPLV   | Negative |
| O55245 | TEAAPLVSHGSIDSKCPLMV   | Negative |
| O55245 | MAFHSMMLLVFLAGLVFLTEA  | Negative |
| O55245 | AGLVFLTEAAPLVSHGSIDS   | Negative |
| O55245 | LTEAAPLVSHGSIDSKCPLM   | Negative |
| O55245 | LVFLAGLVFLTEAAPLVSHG   | Negative |
| O55245 | IDSKCPLMVKVLD A VRGSPA | Negative |
| O55245 | HGSIDSKCPLMVKVLD A VRG | Negative |
| O55245 | AFHSMMLLVFLAGLVFLTEAA  | Negative |
| O55245 | PLVSHGSIDSKCPLMVKVLD   | Negative |
| O55245 | AAPLVSHGSIDSKCPLMVKV   | Negative |
| O55245 | SIDSKCPLMVKVLD A VRGSP | Negative |
| O55245 | FHSMMLLVFLAGLVFLTEAAP  | Negative |
| O55245 | GSIDSKCPLMVKVLD A VRGS | Negative |
| O55245 | VFLTEAAPLVSHGSIDSKCP   | Negative |
| O55245 | SHGSIDSKCPLMVKVLD A VR | Negative |
| O55245 | LVFLTEAAPLVSHGSIDSKC   | Negative |
| O55245 | LAGLVFLTEAAPLVSHGSID   | Negative |
| O55245 | VFLAGLVFLTEAAPLVSHGS   | Negative |
| O55245 | LLVFLAGLVFLTEAAPLVSH   | Negative |

|        |                       |          |
|--------|-----------------------|----------|
| O55245 | EAAPLVSHGSIDSKCPLMVK  | Negative |
| O55245 | GLVFLTEAAPLVSHGSIDSK  | Negative |
| O55245 | DSKCPLMVKVLDVAVRGSPAA | Negative |
| O57385 | ETGKNPVKKNYGLYGCNCGVG | Negative |
| O57385 | ELGKMIWQETGKNPVKKNYGL | Negative |
| O57385 | VEGSLFELGKMIWQETGKNP  | Negative |
| O57385 | LVGVEGSLFELGKMIWQETG  | Negative |
| O57385 | LFELGKMIWQETGKNPVKKNY | Negative |
| O57385 | QETGKNPVKKNYGLYGCNCGV | Negative |
| O57385 | FELGKMIWQETGKNPVKKNYG | Negative |
| O57385 | VGVEGSLFELGKMIWQETGK  | Negative |
| O57385 | GVEGSLFELGKMIWQETGKN  | Negative |
| O57385 | GKMIWQETGKNPVKKNYGLYG | Negative |
| O57385 | VLLVGVEGSLFELGKMIWQE  | Negative |
| O57385 | IVAVLLVGVEGSLFELGKMI  | Negative |
| O57385 | LLVGVEGSLFELGKMIWQET  | Negative |
| O57385 | LGKMIWQETGKNPVKKNYGLY | Negative |
| O57385 | MRALWIVAVLLVGVEGSLFE  | Negative |
| O57385 | WQETGKNPVKKNYGLYGCNCG | Negative |
| O57385 | LWIVAVLLVGVEGSLFELGK  | Negative |
| O57385 | VAVLLVGVEGSLFELGKMIW  | Negative |
| O57385 | GSLFELGKMIWQETGKNPVK  | Negative |
| O57385 | GKNPVKKNYGLYGCNCGVGGR | Negative |
| O57385 | SLFELGKMIWQETGKNPVKN  | Negative |
| O57385 | EGSLFELGKMIWQETGKNPV  | Negative |
| O57385 | MIWQETGKNPVKKNYGLYGCN | Negative |
| O57385 | IWQETGKNPVKKNYGLYGCNC | Negative |
| O57385 | KMIWQETGKNPVKKNYGLYGC | Negative |
| O57385 | AVLLVGVEGSLFELGKMIWQ  | Negative |
| O57385 | ALWIVAVLLVGVEGSLFELG  | Negative |
| O57385 | WIVAVLLVGVEGSLFELGKM  | Negative |
| O57385 | TGKNPVKKNYGLYGCNCGVGG | Negative |
| O57690 | SRSCDFCHNIGADCEGFQHE  | Negative |
| O57690 | CDFCHNIGADCEGFQHECSS  | Negative |
| O57690 | IGADCEGFQHECSSPEDECG  | Negative |
| O57690 | SLHIICLLFIFVARGNSRSC  | Negative |
| O57690 | MKSLHIICLLFIFVARGNSR  | Negative |
| O57690 | LHIICLLFIFVARGNSRSCD  | Negative |
| O57690 | CLLFIFVARGNSRSCDFCHN  | Negative |
| O57690 | ICLLFIFVARGNSRSCDFCH  | Negative |
| O57690 | LFIFVARGNSRSCDFCHNIG  | Negative |
| O57690 | GNSRSCDFCHNIGADCEGFQ  | Negative |
| O57690 | ARGNSRSCDFCHNIGADCEG  | Negative |
| O57690 | RSCDFCHNIGADCEGFQHEC  | Negative |
| O57690 | KSLHIICLLFIFVARGNSRS  | Negative |
| O57690 | NIGADCEGFQHECSSPEDEC  | Negative |

|        |                      |          |
|--------|----------------------|----------|
| O57690 | SCDFCHNIGADCEGFQHECS | Negative |
| O57690 | FCHNIGADCEGFQHECSSPE | Negative |
| O57690 | NSRSCDFCHNIGADCEGFQH | Negative |
| O57690 | IICLLFIFVARGNSRSCDFC | Negative |
| O57690 | FVARGNSRSCDFCHNIGADC | Negative |
| O57690 | GADCEGFQHECSSPEDECGK | Negative |
| O57690 | CHNIGADCEGFQHECSSPED | Negative |
| O57690 | HNIGADCEGFQHECSSPEDE | Negative |
| O57690 | LLFIFVARGNSRSCDFCHNI | Negative |
| O57690 | DFCHNIGADCEGFQHECSSP | Negative |
| O57690 | VARGNSRSCDFCHNIGADCE | Negative |
| O57690 | RGNSRSCDFCHNIGADCEGF | Negative |
| O57690 | ADCEGFQHECSSPEDECGKV | Negative |
| O57690 | FIFVARGNSRSCDFCHNIGA | Negative |
| O57690 | IFVARGNSRSCDFCHNIGAD | Negative |
| O59896 | LAAVANAAIGPVADLTLTNA | Negative |
| O59896 | AIGPVADLTLTNAAVSPDGF | Negative |
| O59896 | LTLTNAAVSPDGFSREAVVV | Negative |
| O59896 | VANAAIGPVADLTLTNAAVS | Negative |
| O59896 | VSLAAVANAAIGPVADLTLT | Negative |
| O59896 | NAAIGPVADLTLTNAAVSPD | Negative |
| O59896 | FVLVSLAAVANAAIGPVADL | Negative |
| O59896 | SRFQSLLSFVLVSLAAVANA | Negative |
| O59896 | FQSLLSFVLVSLAAVANAAI | Negative |
| O59896 | VLVSLAAVANAAIGPVADLT | Negative |
| O59896 | ANAAIGPVADLTLTNAAVSP | Negative |
| O59896 | SLLSFVLVSLAAVANAAIGP | Negative |
| O59896 | PVADLTLTNAAVSPDGFSRE | Negative |
| O59896 | IGPVADLTLTNAAVSPDGFS | Negative |
| O59896 | AVANAAIGPVADLTLTNAAV | Negative |
| O59896 | DLTLTNAAVSPDGFSREAVV | Negative |
| O59896 | GPVADLTLTNAAVSPDGFSR | Negative |
| O59896 | MSRFQSLLSFVLVSLAAVAN | Negative |
| O59896 | AAVANAAIGPVADLTLTNAA | Negative |
| O59896 | QSLLSFVLVSLAAVANAAIG | Negative |
| O59896 | TLTNAAVSPDGFSREAVVVN | Negative |
| O59896 | AAIGPVADLTLTNAAVSPDG | Negative |
| O59896 | RFQSLLSFVLVSLAAVANAA | Negative |
| O59896 | LSFVLVSLAAVANAAIGPVA | Negative |
| O59896 | VADLTLTNAAVSPDGFSREA | Negative |
| O59896 | ADLTLTNAAVSPDGFSREAV | Negative |
| O59896 | SLAAVANAAIGPVADLTLTN | Negative |
| O59896 | SFVLVSLAAVANAAIGPVAD | Negative |
| O59896 | LVSLAAVANAAIGPVADLTL | Negative |
| O60046 | MKSIFLSLSLLASATVGVLA | Negative |
| O60046 | LAAEELGIDVTPVECDRKT  | Negative |

|        |                      |          |
|--------|----------------------|----------|
| O60046 | ATVGVLAEEELGIDVTVPVE | Negative |
| O60046 | SATVGVLAEEELGIDVTVPV | Negative |
| O60046 | IDVTVPVECDRKTRKGDKIN | Negative |
| O60046 | KSIFLSLSLLASATVGVLA  | Negative |
| O60046 | FLSLSLLASATVGVLAEEEL | Negative |
| O60046 | EELGIDVTVPVECDRKTRKG | Negative |
| O60046 | VGVLAAEELGIDVTVPVECD | Negative |
| O60046 | ELGIDVTVPVECDRKTRKGD | Negative |
| O60046 | SIFLSLSLLASATVGVLAEE | Negative |
| O60046 | IFLSLSLLASATVGVLAEE  | Negative |
| O60046 | LGIDVTVPVECDRKTRKGDK | Negative |
| O60046 | GVLAEEELGIDVTVPVECDR | Negative |
| O60046 | AEELGIDVTVPVECDRKTRK | Negative |
| O60046 | DVTVPVECDRKTRKGDKINV | Negative |
| O60046 | SLSLLASATVGVLAEEELGI | Negative |
| O60046 | VLAAEELGIDVTVPVECDRK | Negative |
| O60046 | ASATVGVLAEEELGIDVTVP | Negative |
| O60046 | LSLLASATVGVLAEEELGID | Negative |
| O60046 | GIDVTVPVECDRKTRKGDKI | Negative |
| O60046 | TVPVECDRKTRKGDKINVHY | Negative |
| O60046 | AAEELGIDVTVPVECDRKTR | Negative |
| O60046 | VPVECDRKTRKGDKINVHYR | Negative |
| O60046 | SLLASATVGVLAEEELGIDV | Negative |
| O60046 | TVGVLAEEELGIDVTVPVEC | Negative |
| O60046 | VTVPVECDRKTRKGDKINVH | Negative |
| O60046 | LASATVGVLAEEELGIDVTV | Negative |
| O60046 | LLASATVGVLAEEELGIDVT | Negative |
| O60565 | TVGALLLLLTLLPAAEGKK  | Negative |
| O60565 | LLGTLLPAAEGKKKGSQGAI | Negative |
| O60565 | SQGAIPPPDKAQHNDSEQTQ | Negative |
| O60565 | PAAEGKKKGSQGAIPPPDKA | Negative |
| O60565 | GSQGAIPPPDKAQHNDSEQT | Negative |
| O60565 | LGTLPPAAEGKKKGSQGAIP | Negative |
| O60565 | TLLPAAEGKKKGSQGAIPPP | Negative |
| O60565 | KGSQGAIPPPDKAQHNDSEQ | Negative |
| O60565 | GKKKGSQGAIPPPDKAQHND | Negative |
| O60565 | LLPAAEGKKKGSQGAIPPPD | Negative |
| O60565 | EGKKKGSQGAIPPPDKAQHN | Negative |
| O60565 | LLLLGTLLPAAEGKKKGSQ  | Negative |
| O60565 | LLGTLLPAAEGKKKGSQGA  | Negative |
| O60565 | KKKGSQGAIPPPDKAQHNS  | Negative |
| O60565 | LLLGTLLPAAEGKKKGSQG  | Negative |
| O60565 | VGALLLLLTLLPAAEGKKK  | Negative |
| O60565 | AEGKKKGSQGAIPPPDKAQH | Negative |
| O60565 | GALLLLLTLLPAAEGKKKG  | Negative |
| O60565 | AYTVGALLLLLTLLPAAEG  | Negative |

|        |                      |          |
|--------|----------------------|----------|
| O60565 | KKGSQGAIPPPDKAQHNDSE | Negative |
| O60565 | QGAIPPPDKAQHNDSEQTQS | Negative |
| O60565 | RTAYTVGALLLLLGTLLPAA | Negative |
| O60565 | YTVGALLLLLGTLLPAAEGK | Negative |
| O60565 | LPAAEGKKKGSQGAIPPPDK | Negative |
| O60565 | MSRTAYTVGALLLLLGTLLP | Negative |
| O60565 | SRTAYTVGALLLLLGTLLPA | Negative |
| O60565 | AAEGKKKGSQGAIPPPDKAQ | Negative |
| O60565 | GTLLPAAEGKKKGSQGAIPP | Negative |
| O60565 | TAYTVGALLLLLGTLLPAAE | Negative |
| O60609 | PLNPRPLPPVVLMLLLLLPP | Negative |
| O60609 | LLPPSPLPLAAGDPLPTESR | Negative |
| O60609 | AGDPLPTESRLMNSCLQARR | Negative |
| O60609 | LAAGDPLPTESRLMNSCLQA | Negative |
| O60609 | MVRPLNPRPLPPVVLMLLLL | Negative |
| O60609 | VRPLNPRPLPPVVLMLLLLL | Negative |
| O60609 | PVVLMLLLLLPPSPLPLAAG | Negative |
| O60609 | PPSPLPLAAGDPLPTESRLM | Negative |
| O60609 | VLMLLLLLPPSPLPLAAGDP | Negative |
| O60609 | LMLLLLLPPSPLPLAAGDPL | Negative |
| O60609 | VVLMLLLLLPPSPLPLAAGD | Negative |
| O60609 | NPRPLPPVVLMLLLLLPPSP | Negative |
| O60609 | AAGDPLPTESRLMNSCLQAR | Negative |
| O60609 | PLPPVVLMLLLLLPPSPLPL | Negative |
| O60609 | LLLLPPSPLPLAAGDPLPTE | Negative |
| O60609 | PLAAGDPLPTESRLMNSCLQ | Negative |
| O60609 | LPLAAGDPLPTESRLMNSCL | Negative |
| O60609 | PPVVLMLLLLLPPSPLPLAA | Negative |
| O60609 | SPLPLAAGDPLPTESRLMNS | Negative |
| O60609 | PRPLPPVVLMLLLLLPPSPL | Negative |
| O60609 | LLPPSPLPLAAGDPLPTES  | Negative |
| O60609 | LNPRPLPPVVLMLLLLLPPS | Negative |
| O60609 | MLLLLLPPSPLPLAAGDPLP | Negative |
| O60609 | RPLNPRPLPPVVLMLLLLLP | Negative |
| O60609 | LPPVVLMLLLLLPPSPLPLA | Negative |
| O60609 | RPLPPVVLMLLLLLPPSPLP | Negative |
| O60609 | PSPLPLAAGDPLPTESRLMN | Negative |
| O60609 | LPPSPLPLAAGDPLPTESRL | Negative |
| O60609 | PLPLAAGDPLPTESRLMNSC | Negative |
| O60844 | ALLALLCASASGNAIQARSS | Negative |
| O60844 | CASASGNAIQARSSSYSGEY | Negative |
| O60844 | SGEYGGGGGKRFSHSGNQLD | Negative |
| O60844 | LLCASASGNAIQARSSSYSG | Negative |
| O60844 | SASGNAIQARSSSYSGEYGG | Negative |
| O60844 | VALLALLCASASGNAIQARS | Negative |
| O60844 | YSGEYGGGGGKRFSHSGNQL | Negative |



|        |                       |          |
|--------|-----------------------|----------|
| O60844 | RSSSYSGEYGGGGGKRFSHS  | Negative |
| O60844 | GNAIQARSSSYSGEYGGGGG  | Negative |
| O60844 | AIQARSSSYSGEYGGGGGKR  | Negative |
| O60844 | LLALLCASASGNAIQARSSS  | Negative |
| O60844 | ASASGNAIQARSSSYSGEYG  | Negative |
| O60844 | MLTVALLALLCASASGNAIQ  | Negative |
| O60844 | SYSGEYGGGGGKRFSHSGNQ  | Negative |
| O60844 | YGGGGGKRFSHSGNQLDGPI  | Negative |
| O60844 | SSSYSGEYGGGGGKRFSHSG  | Negative |
| O60844 | EYGGGGGKRFSHSGNQLDGP  | Negative |
| O60844 | ALLCASASGNAIQARSSSYS  | Negative |
| O60844 | LALLCASASGNAIQARSSSY  | Negative |
| O60844 | NAIQARSSSYSGEYGGGGGK  | Negative |
| O60844 | LCASASGNAIQARSSSYSGE  | Negative |
| O60844 | TVALLALLCASASGNAIQAR  | Negative |
| O60844 | ARSSSYSGEYGGGGGKRFSH  | Negative |
| O60844 | IQARSSSYSGEYGGGGGKRF  | Negative |
| O60844 | QARSSSYSGEYGGGGGKRFS  | Negative |
| O60844 | SSSYSGEYGGGGGKRFSHSGN | Negative |
| O60844 | ASGNAIQARSSSYSGEYGGG  | Negative |
| O60844 | SGNAIQARSSSYSGEYGGGG  | Negative |
| O60844 | GEYGGGGGKRFSHSGNQLDG  | Negative |
| O61668 | SGKVSECLLNNYCNNICTKV  | Negative |
| O61668 | GKVSECLLNNYCNNICTKVY  | Negative |
| O61668 | MGVLGKKNGYAVDSSGKVSE  | Negative |
| O61668 | VDSSGKVSECLLNNYCNNIC  | Negative |
| O61668 | FFLIFLVIFPIMGVLGKKNG  | Negative |
| O61668 | YAVDSSGKVSECLLNNYCNN  | Negative |
| O61668 | DSSGKVSECLLNNYCNNICT  | Negative |
| O61668 | SSGKVSECLLNNYCNNICTK  | Negative |
| O61668 | KFFLIFLVIFPIMGVLGKKN  | Negative |
| O61668 | KVSECLLNNYCNNICTKVYY  | Negative |
| O61668 | AVDSSGKVSECLLNNYCNNI  | Negative |
| O61668 | PIMGVLGKKNGYAVDSSGKV  | Negative |
| O61668 | IFLVIFPIMGVLGKKNGYAV  | Negative |
| O61668 | NGYAVDSSGKVSECLLNNYC  | Negative |
| O61668 | GYAVDSSGKVSECLLNNYCN  | Negative |
| O61668 | LIFLVIFPIMGVLGKKNGYA  | Negative |
| O61668 | FPIMGVLGKKNGYAVDSSGK  | Negative |
| O61668 | VIFPIMGVLGKKNGYAVDSS  | Negative |
| O61668 | IFPIMGVLGKKNGYAVDSSG  | Negative |
| O61668 | GKKNGYAVDSSGKVSECLLN  | Negative |
| O61668 | MKFFLIFLVIFPIMGVLGKK  | Negative |
| O61668 | FLVIFPIMGVLGKKNGYAVD  | Negative |
| O61668 | LGKKNGYAVDSSGKVSECLL  | Negative |
| O61668 | LVIFPIMGVLGKKNGYAVDS  | Negative |

|        |                       |          |
|--------|-----------------------|----------|
| O61668 | GVLGKKNGYAVDSSGKVSEC  | Negative |
| O61668 | KNGYAVDSSGKVSECLLNNY  | Negative |
| O61668 | IMGVLGKKNGYAVDSSGKVS  | Negative |
| O61668 | VLGKKNGYAVDSSGKVSECL  | Negative |
| O61668 | KKNGYAVDSSGKVSECLLNN  | Negative |
| O61705 | MNYLVMISFALLLMKGVESV  | Negative |
| O61705 | LLLMKGVESVRDAYIAKPEN  | Negative |
| O61705 | MISFALLLMKGVESVRDAYI  | Negative |
| O61705 | IAKPENCVYECGITQDCNKL  | Negative |
| O61705 | LVMISFALLLMKGVESVRDA  | Negative |
| O61705 | LMKGVESVRDAYIAKPENCV  | Negative |
| O61705 | NCVYECGITQDCNKLCTENG  | Negative |
| O61705 | KPENCVYECGITQDCNKLCT  | Negative |
| O61705 | ENCVYECGITQDCNKLCTEN  | Negative |
| O61705 | VESVRDAYIAKPENCVYECG  | Negative |
| O61705 | ALLLMKGVESVRDAYIAKPE  | Negative |
| O61705 | DAYIAKPENCVYECGITQDC  | Negative |
| O61705 | ISFALLLMKGVESVRDAYIA  | Negative |
| O61705 | AKPENCVYECGITQDCNKL   | Negative |
| O61705 | YIAKPENCVYECGITQDCNK  | Negative |
| O61705 | ESVRDAYIAKPENCVYECGI  | Negative |
| O61705 | SVRDAYIAKPENCVYECGIT  | Negative |
| O61705 | VRDAYIAKPENCVYECGITQ  | Negative |
| O61705 | NYLVMISFALLLMKGVESVR  | Negative |
| O61705 | AYIAKPENCVYECGITQDCN  | Negative |
| O61705 | PENCVYECGITQDCNKLCTE  | Negative |
| O61705 | MKGVESVRDAYIAKPENCVY  | Negative |
| O61705 | FALLLMKGVESVRDAYIAKP  | Negative |
| O61705 | KGVESVRDAYIAKPENCVYE  | Negative |
| O61705 | YLVMSIFALLLMKGVESVRD  | Negative |
| O61705 | RDAYIAKPENCVYECGITQD  | Negative |
| O61705 | GVESVRDAYIAKPENCVYEC  | Negative |
| O61705 | SFALLLMKGVESVRDAYIAK  | Negative |
| O61705 | LLMKGVESVRDAYIAKPENC  | Negative |
| O62605 | ALTVALCEAGPANNVVRPCR  | Negative |
| O62605 | AGPANNVVRPCRLDDLKCIR  | Negative |
| O62605 | IIFALTVALCEAGPANNVVR  | Negative |
| O62605 | MLKFIIIFALTVALCEAGPAN | Negative |
| O62605 | LCEAGPANNVVRPCRLDDLK  | Negative |
| O62605 | FALTVALCEAGPANNVVRPC  | Negative |
| O62605 | IFALTVALCEAGPANNVVRP  | Negative |
| O62605 | RPCRLDDLKCIRDNISANSN  | Negative |
| O62605 | NNVVRPCRLDDLKCIRDNIS  | Negative |
| O62605 | VRPCRLDDLKCIRDNISANS  | Negative |
| O62605 | GPANNVVRPCRLDDLKCIRD  | Negative |
| O62605 | VVRPCRLDDLKCIRDNISAN  | Negative |

|        |                       |          |
|--------|-----------------------|----------|
| O62605 | LDDLKCIRDNISANSNCNAN  | Negative |
| O62605 | VALCEAGPANNVVRPCRLDD  | Negative |
| O62605 | KFIIFALTVALCEAGPANNV  | Negative |
| O62605 | ALCEAGPANNVVRPCRLDDL  | Negative |
| O62605 | RLDDLKCIRDNISANSNCNA  | Negative |
| O62605 | LTVALCEAGPANNVVRPCRL  | Negative |
| O62605 | EAGPANNVVRPCRLDDLKCI  | Negative |
| O62605 | PANNVVRPCRLDDLKCIRDN  | Negative |
| O62605 | DLKCIRDNISANSNCNANVR  | Negative |
| O62605 | DDLKCIRDNISANSNCNANV  | Negative |
| O62605 | NVVRPCRLDDLKCIRDNISA  | Negative |
| O62605 | CEAGPANNVVRPCRLDDLKC  | Negative |
| O62605 | ANNVVRPCRLDDLKCIRDNI  | Negative |
| O62605 | PCRLDDLKCIRDNISANSNC  | Negative |
| O62605 | CRLDDLKCIRDNISANSNCN  | Negative |
| O62605 | TVALCEAGPANNVVRPCRLD  | Negative |
| O62605 | FIIFALTVALCEAGPANNVV  | Negative |
| O62644 | AALISPALAGPWAICAGKS   | Negative |
| O62644 | PWAICAGKSSNEIRTCDBGH  | Negative |
| O62644 | PALAGPWAICAGKSSNEIR   | Negative |
| O62644 | ALAGPWAICAGKSSNEIRT   | Negative |
| O62644 | SSNEIRTCDBGHGCGQYTAQR | Negative |
| O62644 | LISPALAGPWAICAGKSSN   | Negative |
| O62644 | ISPALAGPWAICAGKSSNE   | Negative |
| O62644 | AGPWAICAGKSSNEIRTC    | Negative |
| O62644 | IICAGKSSNEIRTCDBGHGCG | Negative |
| O62644 | CAGKSSNEIRTCDBGHGCGQY | Negative |
| O62644 | GPWAICAGKSSNEIRTC     | Negative |
| O62644 | ICAGKSSNEIRTCDBGHGCGQ | Negative |
| O62644 | GTLLLAALISPALAGPWAI   | Negative |
| O62644 | FSTGTLLLAALISPALAGPW  | Negative |
| O62644 | LAALISPALAGPWAICAGK   | Negative |
| O62644 | STGTLLLAALISPALAGPWA  | Negative |
| O62644 | LLAALISPALAGPWAICAG   | Negative |
| O62644 | WAICAGKSSNEIRTCDBGHG  | Negative |
| O62644 | SNEIRTCDBGHGCGQYTAQRN | Negative |
| O62644 | MFSTGTLLLAALISPALAGP  | Negative |
| O62644 | SPALAGPWAICAGKSSNEI   | Negative |
| O62644 | ALISPALAGPWAICAGKSS   | Negative |
| O62644 | KSSNEIRTCDBGHGCGQYTAQ | Negative |
| O62644 | TLLLAALISPALAGPWAIC   | Negative |
| O62644 | AGKSSNEIRTCDBGHGCGQYT | Negative |
| O62644 | LLLAALISPALAGPWAICA   | Negative |
| O62644 | LAGPWAICAGKSSNEIRTC   | Negative |
| O62644 | GKSSNEIRTCDBGHGCGQYTA | Negative |
| O62644 | AICAGKSSNEIRTCDBGHGC  | Negative |

|        |                      |          |
|--------|----------------------|----------|
| O62680 | GGFILLWLLSILAVLCHLGH | Negative |
| O62680 | HSLQCYNCINPAGSCTTAMN | Negative |
| O62680 | GSKGGFILLWLLSILAVLCH | Negative |
| O62680 | AVLCHLGHSLQCYNCINPAG | Negative |
| O62680 | MGSKGGFILLWLLSILAVLC | Negative |
| O62680 | GHSLQCYNCINPAGSCTTAM | Negative |
| O62680 | KGGFILLWLLSILAVLCHLG | Negative |
| O62680 | LSILAVLCHLGHSLQCYNCI | Negative |
| O62680 | LCHLGHSLQCYNCINPAGSC | Negative |
| O62680 | LWLLSILAVLCHLGHSLQCY | Negative |
| O62680 | YNCINPAGSCTTAMNCSHNQ | Negative |
| O62680 | FILLWLLSILAVLCHLGHSL | Negative |
| O62680 | LLSILAVLCHLGHSLQCYNC | Negative |
| O62680 | NCINPAGSCTTAMNCSHNQD | Negative |
| O62680 | LLWLLSILAVLCHLGHSLQC | Negative |
| O62680 | SLQCYNCINPAGSCTTAMNC | Negative |
| O62680 | LQCYNCINPAGSCTTAMNCS | Negative |
| O62680 | SILAVLCHLGHSLQCYNCIN | Negative |
| O62680 | CYNCINPAGSCTTAMNCSHN | Negative |
| O62680 | HLGHSLQCYNCINPAGSCTT | Negative |
| O62680 | VLCHLGHSLQCYNCINPAGS | Negative |
| O62680 | LGHS�QCYNCINPAGSCTTA | Negative |
| O62680 | CHLGHSLQCYNCINPAGSCT | Negative |
| O62680 | LAVLCHLGHSLQCYNCINPA | Negative |
| O62680 | ILAVLCHLGHSLQCYNCINP | Negative |
| O62680 | ILLWLLSILAVLCHLGHSLQ | Negative |
| O62680 | SKGGFILLWLLSILAVLCHL | Negative |
| O62680 | GFILLWLLSILAVLCHLGH  | Negative |
| O62680 | QCYNCINPAGSCTTAMNCSH | Negative |
| O64392 | ARPMLVVALLCAAAAATAQ  | Negative |
| O64392 | ATYHYRPAQNNWDLGAPAV  | Negative |
| O64392 | VVALLCAAAAATAQQATNV  | Negative |
| O64392 | CAAAAAATAQQATNVRATYH | Negative |
| O64392 | AATAQQATNVRATYHYRPA  | Negative |
| O64392 | AAAAAATAQQATNVRATYHY | Negative |
| O64392 | RATYHYRPAQNNWDLGAPA  | Negative |
| O64392 | MLVVALLCAAAAATAQQAT  | Negative |
| O64392 | MAARPMLVVALLCAAAAAT  | Negative |
| O64392 | VALLCAAAAAATAQQATNVR | Negative |
| O64392 | ALLCAAAAAATAQQATNVRA | Negative |
| O64392 | NVRATYHYRPAQNNWDLGA  | Negative |
| O64392 | TYHYRPAQNNWDLGAPAVS  | Negative |
| O64392 | VRATYHYRPAQNNWDLGAP  | Negative |
| O64392 | LCAAAAAATAQQATNVRATY | Negative |
| O64392 | TNVRATYHYRPAQNNWDLG  | Negative |
| O64392 | AAAAATAQQATNVRATYHY  | Negative |

|        |                      |          |
|--------|----------------------|----------|
| O64392 | LLCAAAAAATAQQATNVRAT | Negative |
| O64392 | ATNVRATYHYRPAQNNWDL  | Negative |
| O64392 | QATNVRATYHYRPAQNNWD  | Negative |
| O64392 | TAQQATNVRATYHYRPAQN  | Negative |
| O64392 | AAAATAQQATNVRATYHYR  | Negative |
| O64392 | QQATNVRATYHYRPAQNNW  | Negative |
| O64392 | ATAQQATNVRATYHYRPAQ  | Negative |
| O64392 | PMLVALLCAAAAAATAQQA  | Negative |
| O64392 | AQQATNVRATYHYRPAQNN  | Negative |
| O64392 | RPMLVALLCAAAAAATAQQ  | Negative |
| O64392 | AARPMLVALLCAAAAAATA  | Negative |
| O64392 | AAATAQQATNVRATYHYRP  | Negative |
| O64393 | MTMAARLMLVAALLCAAAAA | Negative |
| O64393 | AARLMLVAALLCAAAAAATA | Negative |
| O64393 | TAQQATNVRATYHYRPAQN  | Negative |
| O64393 | QQATNVRATYHYRPAQNNW  | Negative |
| O64393 | TNVRATYHYRPAQNNWDLG  | Negative |
| O64393 | ARLMLVAALLCAAAAAATAQ | Negative |
| O64393 | AATAQQATNVRATYHYRPA  | Negative |
| O64393 | QATNVRATYHYRPAQNNWD  | Negative |
| O64393 | TMAARLMLVAALLCAAAAAA | Negative |
| O64393 | ATAQQATNVRATYHYRPAQ  | Negative |
| O64393 | LLCAAAAAATAQQATNVRAT | Negative |
| O64393 | ATNVRATYHYRPAQNNWDL  | Negative |
| O64393 | VRATYHYRPAQNNWDLGAP  | Negative |
| O64393 | RLMLVAALLCAAAAAATAQQ | Negative |
| O64393 | LMLVAALLCAAAAAATAQQA | Negative |
| O64393 | CAAAAAATAQQATNVRATYH | Negative |
| O64393 | AAAAATAQQATNVRATYHY  | Negative |
| O64393 | AAAAATAQQATNVRATYHY  | Negative |
| O64393 | MAARLMLVAALLCAAAAAAT | Negative |
| O64393 | LCAAAAAATAQQATNVRATY | Negative |
| O64393 | AALLCAAAAAATAQQATNVR | Negative |
| O64393 | RATYHYRPAQNNWDLGAPA  | Negative |
| O64393 | NVRATYHYRPAQNNWDLGA  | Negative |
| O64393 | AAAATAQQATNVRATYHYR  | Negative |
| O64393 | MLVAALLCAAAAAATAQQAT | Negative |
| O64393 | AQQATNVRATYHYRPAQNN  | Negative |
| O64393 | ALLCAAAAAATAQQATNVRA | Negative |
| O64393 | VAALLCAAAAAATAQQATNV | Negative |
| O64393 | AAATAQQATNVRATYHYRP  | Negative |
| O64411 | SLAATVGPRVIVVGAGMSGI | Negative |
| O64411 | GLLAVAALLLALSQAQHGSL | Negative |
| O64411 | AALLALSQAQHGSLAATVG  | Negative |
| O64411 | LLLALSQAQHGSLAATVGPR | Negative |
| O64411 | SSSPSFGLLAVAALLLALS  | Negative |

|        |                       |          |
|--------|-----------------------|----------|
| O64411 | AQHGS LAATVGPRVIVVGAG | Negative |
| O64411 | ATVGPRVIVVGAGMSGISAA  | Negative |
| O64411 | QHGS LAATVGPRVIVVGAGM | Negative |
| O64411 | LALSLAQHGS LAATVGPRVI | Negative |
| O64411 | SFGLLAVAALLLALSLAQHG  | Negative |
| O64411 | VAALLLALSLAQHGS LAATV | Negative |
| O64411 | TVGPRVIVVGAGMSGISA AK | Negative |
| O64411 | SSPSFGLLAVAALLLALSLA  | Negative |
| O64411 | AATVGPRVIVVGAGMSGISA  | Negative |
| O64411 | ALSLAQHGS LAATVGPRVIV | Negative |
| O64411 | PSFGLLAVAALLLALSLAQH  | Negative |
| O64411 | LSLAQHGS LAATVGPRVIVV | Negative |
| O64411 | HGS LAATVGPRVIVVGAGMS | Negative |
| O64411 | LAATVGPRVIVVGAGMSGIS  | Negative |
| O64411 | FGLLAVAALLLALSLAQHGS  | Negative |
| O64411 | LLALSLAQHGS LAATVGPRV | Negative |
| O64411 | MSSSPSFGLLAVAALLLALS  | Negative |
| O64411 | LAQHGS LAATVGPRVIVVGA | Negative |
| O64411 | GSLAATVGPRVIVVGAGMSG  | Negative |
| O64411 | SPSFGLLAVAALLLALSLAQ  | Negative |
| O64411 | AVAALLLALSLAQHGS LAAT | Negative |
| O64411 | SLAQHGS LAATVGPRVIVVG | Negative |
| O64411 | LLAVAALLLALSLAQHGS LA | Negative |
| O64411 | LAVAALLLALSLAQHGS LA  | Negative |
| O68900 | MNKIYSIKYSAATGGLIAVS  | Negative |
| O68900 | GLIAVSELAKKVICKTNRKI  | Negative |
| O68900 | LIAVSELAKKVICKTNRKIS  | Negative |
| O68900 | IAVSELAKKVICKTNRKISA  | Negative |
| O68900 | ATGGLIAVSELAKKVICKTN  | Negative |
| O68900 | IYSIKYSAATGGLIAVSELA  | Negative |
| O68900 | IKYSAATGGLIAVSELAKKV  | Negative |
| O68900 | AKKVICKTNRKISAALLSLA  | Negative |
| O68900 | KTNRKISAALLSLAVISYTN  | Negative |
| O68900 | SELAKKVICKTNRKISAALL  | Negative |
| O68900 | NKIYSIKYSAATGGLIAVSE  | Negative |
| O68900 | TNRKISAALLSLAVISYTN   | Negative |
| O68900 | CKTNRKISAALLSLAVISYT  | Negative |
| O68900 | ICKTNRKISAALLSLAVISY  | Negative |
| O68900 | KKVICKTNRKISAALLSLAV  | Negative |
| O68900 | GGLIAVSELAKKVICKTNRK  | Negative |
| O68900 | VSELAKKVICKTNRKISAAL  | Negative |
| O68900 | SIKYSAATGGLIAVSELAKK  | Negative |
| O68900 | KIYSIKYSAATGGLIAVSEL  | Negative |
| O68900 | AVSELAKKVICKTNRKISAA  | Negative |
| O68900 | VICKTNRKISAALLSLAVIS  | Negative |
| O68900 | ELAKKVICKTNRKISAALLS  | Negative |

|        |                       |          |
|--------|-----------------------|----------|
| O68900 | KYSAATGGLIAVSELAKKVI  | Negative |
| O68900 | LAKKVICKTNRKISAALLSL  | Negative |
| O68900 | TGGLIAVSELAKKVICKTNR  | Negative |
| O68900 | AATGGLIAVSELAKKVICKT  | Negative |
| O68900 | YSIKYSAATGGLIAVSELAK  | Negative |
| O68900 | SAATGGLIAVSELAKKVICK  | Negative |
| O68900 | YSAATGGLIAVSELAKKVIC  | Negative |
| O68900 | KVICKTNRKISAALLSLAVI  | Negative |
| O70165 | FSGLLCLCPSQALGQERGAC  | Negative |
| O70165 | SQALGQERGACPDVKVVGLG  | Negative |
| O70165 | QERGACPDVKVVGLGAQDKV  | Negative |
| O70165 | MQWPTLWAFSGLLCLCPSQA  | Negative |
| O70165 | QWPTLWAFSGLLCLCPSQAL  | Negative |
| O70165 | ERGACPDVKVVGLGAQDKVV  | Negative |
| O70165 | GLLCLCPSQALGQERGACPD  | Negative |
| O70165 | AFSGLLCLCPSQALGQERGA  | Negative |
| O70165 | GQERGACPDVKVVGLGAQDK  | Negative |
| O70165 | TLWAFSGLLCLCPSQALGQE  | Negative |
| O70165 | PSQALGQERGACPDVKVVGL  | Negative |
| O70165 | WAFSGLLCLCPSQALGQERG  | Negative |
| O70165 | SGLLCLCPSQALGQERGACP  | Negative |
| O70165 | PTLWAFSGLLCLCPSQALGQ  | Negative |
| O70165 | GACPDVKVVGLGAQDKVVVI  | Negative |
| O70165 | LCLCPSQALGQERGACPDVK  | Negative |
| O70165 | LCPSQALGQERGACPDVKVV  | Negative |
| O70165 | ACPDVKVVGLGAQDKVVVIQ  | Negative |
| O70165 | LLCLCPSQALGQERGACPDV  | Negative |
| O70165 | DVKVVGLGAQDKVVVIQSCP  | Negative |
| O70165 | ALGQERGACPDVKVVGLGAQ  | Negative |
| O70165 | CLCPSQALGQERGACPDVKV  | Negative |
| O70165 | LWAFSGLLCLCPSQALGQER  | Negative |
| O70165 | LGQERGACPDVKVVGLGAQD  | Negative |
| O70165 | QALGQERGACPDVKVVGLGA  | Negative |
| O70165 | RGACPDVKVVGLGAQDKVVV  | Negative |
| O70165 | CPSQALGQERGACPDVKVVG  | Negative |
| O70165 | PDVKVVGLGAQDKVVVIQSC  | Negative |
| O70165 | CPDVKVVGLGAQDKVVVIQS  | Negative |
| O70280 | LLLLGSSSVQGTWEAMPLVR  | Negative |
| O70280 | GTWEAMPLPVRLAEKSQAEEV | Negative |
| O70280 | ALSFLLLLLGSSSVQGTWEA  | Negative |
| O70280 | LWALSFLLLLLGSSSVQGTW  | Negative |
| O70280 | AMPLPVRLAEKSQAEEVAATG | Negative |
| O70280 | LLLLGSSSVQGTWEAMPLV   | Negative |
| O70280 | GSCDRKALWALSFLLLLLGS  | Negative |
| O70280 | FLLLLLGSSSVQGTWEAMPLP | Negative |
| O70280 | LLGSSSVQGTWEAMPLPVRLA | Negative |

|        |                      |          |
|--------|----------------------|----------|
| O70280 | CDRKALWALSFLLLLLGSSS | Negative |
| O70280 | SFLLLLLGSSSVQGTWEAML | Negative |
| O70280 | LLLGSSSVQGTWEAMPLVRL | Negative |
| O70280 | WEAMPLVRLAEKSQAEEVAA | Negative |
| O70280 | EAMPLVRLAEKSQAEEVAAT | Negative |
| O70280 | VQGTWEAMPLVRLAEKSQAE | Negative |
| O70280 | LGSSSVQGTWEAMPLVRLAE | Negative |
| O70280 | KALWALSFLLLLLGSSSVQG | Negative |
| O70280 | SSVQGTWEAMPLVRLAEKSQ | Negative |
| O70280 | TWEAMPLVRLAEKSQAEEVA | Negative |
| O70280 | QGTWEAMPLVRLAEKSQAEE | Negative |
| O70280 | ALWALSFLLLLLGSSSVQGT | Negative |
| O70280 | WALSFLLLLLGSSSVQGTWE | Negative |
| O70280 | GSSSVQGTWEAMPLVRLAEK | Negative |
| O70280 | SSSVQGTWEAMPLVRLAEKS | Negative |
| O70280 | RKALWALSFLLLLLGSSSVQ | Negative |
| O70280 | SVQGTWEAMPLVRLAEKSQA | Negative |
| O70280 | DRKALWALSFLLLLLGSSSV | Negative |
| O70280 | SCDRKALWALSFLLLLLGSS | Negative |
| O70280 | MGSCDRKALWALSFLLLLLG | Negative |
| O75462 | PAGRRGPAAQSARRPPPLLP | Negative |
| O75462 | AGRRGPAAQSARRPPPLPL  | Negative |
| O75462 | RPPPLPLLLLLCVLGAPRA  | Negative |
| O75462 | ARRPPPLPLLLLLCVLGAP  | Negative |
| O75462 | PPLPLLLLLCVLGAPRAGS  | Negative |
| O75462 | PLLLLLCVLGAPRAGSGAHT | Negative |
| O75462 | QSARRPPPLPLLLLLCVLG  | Negative |
| O75462 | LLLLLCVLGAPRAGSGAHTA | Negative |
| O75462 | GAPRAGSGAHTAVISPDPT  | Negative |
| O75462 | MPAGRRGPAAQSARRPPPL  | Negative |
| O75462 | AQSARRPPPLPLLLLLCVL  | Negative |
| O75462 | AAQSARRPPPLPLLLLLCV  | Negative |
| O75462 | LLPLLLLLCVLGAPRAGSGA | Negative |
| O75462 | GRRGPAAQSARRPPPLPL   | Negative |
| O75462 | LCVLGAPRAGSGAHTAVISP | Negative |
| O75462 | PPPLPLLLLLCVLGAPRAG  | Negative |
| O75462 | LPPLLLLLCVLGAPRAGSAH | Negative |
| O75462 | RGPAASARRPPPLPLLLL   | Negative |
| O75462 | VLGAPRAGSGAHTAVISPD  | Negative |
| O75462 | GPAASARRPPPLPLLLL    | Negative |
| O75462 | CVLGAPRAGSGAHTAVISPQ | Negative |
| O75462 | PLPLLLLLCVLGAPRAGSG  | Negative |
| O75462 | PAAQSARRPPPLPLLLLC   | Negative |
| O75462 | LLLCVLGAPRAGSGAHTAVI | Negative |
| O75462 | RRPPPLPLLLLLCVLGAPR  | Negative |
| O75462 | SARRPPPLPLLLLLCVLGA  | Negative |



|        |                      |          |
|--------|----------------------|----------|
| O75462 | RRGPAAQSARRPPPLLPLLL | Negative |
| O75462 | LLCVLGAPRAGSGAHTAVIS | Negative |
| O75462 | LGAPRAGSGAHTAVISQDP  | Negative |
| O75556 | GCKLLEDMVEKTINSDISIP | Negative |
| O75556 | LLEDMVEKTINSDISIPEYK | Negative |
| O75556 | LHCYADSGCKLLEDMVEKTI | Negative |
| O75556 | SGCKLLEDMVEKTINSDISI | Negative |
| O75556 | EKTINSDISIPEYKELLQEF | Negative |
| O75556 | LLMVLMLAALLLHCYADSGC | Negative |
| O75556 | HCYADSGCKLLEDMVEKTIN | Negative |
| O75556 | VEKTINSDISIPEYKELLQE | Negative |
| O75556 | MLAALLLHCYADSGCKLLED | Negative |
| O75556 | EDMVEKTINSDISIPEYKEL | Negative |
| O75556 | MVLMLAALLLHCYADSGCKL | Negative |
| O75556 | CKLLEDMVEKTINSDISIPE | Negative |
| O75556 | LEDMVEKTINSDISIPEYKE | Negative |
| O75556 | ALLLHCYADSGCKLLEDMVE | Negative |
| O75556 | DMVEKTINSDISIPEYKELL | Negative |
| O75556 | KLLEDMVEKTINSDISIPEY | Negative |
| O75556 | LAALLLHCYADSGCKLLEDM | Negative |
| O75556 | KLLMVLMLAALLLHCYADSG | Negative |
| O75556 | CYADSGCKLLEDMVEKTINS | Negative |
| O75556 | DSGCKLLEDMVEKTINSDIS | Negative |
| O75556 | VLMLAALLLHCYADSGCKLL | Negative |
| O75556 | LLHCYADSGCKLLEDMVEKT | Negative |
| O75556 | MVEKTINSDISIPEYKELLQ | Negative |
| O75556 | LLLHCYADSGCKLLEDMVEK | Negative |
| O75556 | ADSGCKLLEDMVEKTINSDI | Negative |
| O75556 | AALLLHCYADSGCKLLEDMV | Negative |
| O75556 | MKLLMVLMLAALLLHCYADS | Negative |
| O75556 | LMLAALLLHCYADSGCKLLE | Negative |
| O75556 | YADSGCKLLEDMVEKTINSD | Negative |
| O75596 | QTTSHTSRLKARKHSKRRVR | Negative |
| O75596 | CILVITLLLDQTTSHTSRLK | Negative |
| O75596 | VITLLLDQTTSHTSRLKARK | Negative |
| O75596 | GLVICILVITLLLDQTTSHT | Negative |
| O75596 | LKARKHSKRRVRDKDGLKT  | Negative |
| O75596 | HTSRLKARKHSKRRVRDKDG | Negative |
| O75596 | TSRLKARKHSKRRVRDKDGD | Negative |
| O75596 | ARKHSKRRVRDKDGLKTQI  | Negative |
| O75596 | TSHTSRLKARKHSKRRVRDK | Negative |
| O75596 | RKHSKRRVRDKDGLKTQIE  | Negative |
| O75596 | LVICILVITLLLDQTTSHTS | Negative |
| O75596 | TTSHTSRLKARKHSKRRVRD | Negative |
| O75596 | KARKHSKRRVRDKDGLKTQ  | Negative |
| O75596 | MAKNGLVICILVITLLLDQT | Negative |

|        |                        |          |
|--------|------------------------|----------|
| O75596 | SHTSRLKARKHSKRRVRDKD   | Negative |
| O75596 | LLDQTTSHTSRLKARKHSKR   | Negative |
| O75596 | NGLVICILVITLLLDQTTSH   | Negative |
| O75596 | KNGLVICILVITLLLDQTTTS  | Negative |
| O75596 | ITLLLDQTTSHTSRLKARKH   | Negative |
| O75596 | RLKARKHSKRRVRDKDGDGDLK | Negative |
| O75596 | ILVITLLLDQTTSHTSRLKA   | Negative |
| O75596 | TLLLDQTTSHTSRLKARKHS   | Negative |
| O75596 | LDQTTSHTSRLKARKHSKRR   | Negative |
| O75596 | DQTTSHTSRLKARKHSKRRV   | Negative |
| O75596 | VICILVITLLLDQTTSHTSR   | Negative |
| O75596 | LVITLLLDQTTSHTSRLKAR   | Negative |
| O75596 | AKNGLVICILVITLLLDQTT   | Negative |
| O75596 | LLLDQTTSHTSRLKARKHSK   | Negative |
| O75596 | SRLKARKHSKRRVRDKDGDGDL | Negative |
| O75629 | ALLASTLLALLVSPARGRGG   | Negative |
| O75629 | PARGRGGRDHGDWDEASRLP   | Negative |
| O75629 | LLALLVSPARGRGGRDHGDW   | Negative |
| O75629 | LAALLASTLLALLVSPARGR   | Negative |
| O75629 | AGLSRGSARALLAALLASTL   | Negative |
| O75629 | ARALLAALLASTLLALLVSP   | Negative |
| O75629 | RALLAALLASTLLALLVSPA   | Negative |
| O75629 | RGRGGRDHGDWDEASRLPPL   | Negative |
| O75629 | LLVSPARGRGGRDHGDWDEA   | Negative |
| O75629 | SRGSARALLAALLASTLLAL   | Negative |
| O75629 | LVSPARGRGGRDHGDWDEAS   | Negative |
| O75629 | STLLALLVSPARGRGGRDHG   | Negative |
| O75629 | LSRGSARALLAALLASTLLA   | Negative |
| O75629 | GSARALLAALLASTLLALLV   | Negative |
| O75629 | GLSRGSARALLAALLASTLL   | Negative |
| O75629 | SARALLAALLASTLLALLVS   | Negative |
| O75629 | LLAALLASTLLALLVSPARG   | Negative |
| O75629 | LLASTLLALLVSPARGRGGR   | Negative |
| O75629 | SPARGRGGRDHGDWDEASRL   | Negative |
| O75629 | AALLASTLLALLVSPARGRG   | Negative |
| O75629 | ARGRGGRDHGDWDEASRLPP   | Negative |
| O75629 | LALLVSPARGRGGRDHGDWD   | Negative |
| O75629 | ASTLLALLVSPARGRGGRDH   | Negative |
| O75629 | ALLAALLASTLLALLVSPAR   | Negative |
| O75629 | ALLVSPARGRGGRDHGDWDE   | Negative |
| O75629 | TLLALLVSPARGRGGRDHGD   | Negative |
| O75629 | VSPARGRGGRDHGDWDEASR   | Negative |
| O75629 | MAGLSRGSARALLAALLAST   | Negative |
| O75629 | RGSARALLAALLASTLLALL   | Negative |
| O75636 | SCPGPRELEASKVVLLPSCP   | Negative |
| O75636 | TQEHPSCPGPRELEASESKVVL | Negative |

|        |                      |          |
|--------|----------------------|----------|
| O75636 | LLGGPACLKTQEHPSCPGPR | Negative |
| O75636 | LKTQEHPSCPGPRELEASKV | Negative |
| O75636 | ILPSLWLLLLGGPACLKTQE | Negative |
| O75636 | PSLWLLLLGGPACLKTQEHP | Negative |
| O75636 | LGGPACLKTQEHPSCPGPRE | Negative |
| O75636 | LWLLLLGGPACLKTQEHPSC | Negative |
| O75636 | ACLKTQEHPSCPGPRELEAS | Negative |
| O75636 | KTQEHPSCPGPRELEASKVV | Negative |
| O75636 | PGPRELEASKVVLLPSCPGA | Negative |
| O75636 | WLLLLGGPACLKTQEHPSCP | Negative |
| O75636 | LPSLWLLLLGGPACLKTQEH | Negative |
| O75636 | EHPSCPGPRELEASKVVLLP | Negative |
| O75636 | CLKTQEHPSCPGPRELEASK | Negative |
| O75636 | LLWILPSLWLLLLGGPACLK | Negative |
| O75636 | GPACLKTQEHPSCPGPRELE | Negative |
| O75636 | PACLKTQEHPSCPGPRELEA | Negative |
| O75636 | HPSCPGPRELEASKVVLLPS | Negative |
| O75636 | DLLWILPSLWLLLLGGPACL | Negative |
| O75636 | LLLGGPACLKTQEHPSCPG  | Negative |
| O75636 | WILPSLWLLLLGGPACLKTQ | Negative |
| O75636 | PSCPGPRELEASKVVLLPSC | Negative |
| O75636 | QEHPSCPGPRELEASKVVLL | Negative |
| O75636 | GGPACLKTQEHPSCPGPREL | Negative |
| O75636 | CPGPRELEASKVVLLPSCPG | Negative |
| O75636 | LWILPSLWLLLLGGPACLKT | Negative |
| O75636 | LLGGPACLKTQEHPSCPGP  | Negative |
| O75636 | MDLLWILPSLWLLLLGGPAC | Negative |
| O75711 | LSCYRKILKDHNCHNLPEGV | Negative |
| O75711 | VLVFTIGLTLLGVQAMPAN  | Negative |
| O75711 | QAMPANRLSCYRKILKDHCN | Negative |
| O75711 | LTLLGVQAMPANRLSCYRK  | Negative |
| O75711 | MKLMVLVFTIGLTLLGVQA  | Negative |
| O75711 | NRLSCYRKILKDHNCHNLPE | Negative |
| O75711 | LLGVQAMPANRLSCYRKILK | Negative |
| O75711 | IGLTLLGVQAMPANRLSCY  | Negative |
| O75711 | GLTLLGVQAMPANRLSCYR  | Negative |
| O75711 | YRKILKDHNCHNLPEGVADL | Negative |
| O75711 | MPANRLSCYRKILKDHNCHN | Negative |
| O75711 | CYRKILKDHNCHNLPEGVAD | Negative |
| O75711 | AMPANRLSCYRKILKDHNCH | Negative |
| O75711 | FTIGLTLLGVQAMPANRLS  | Negative |
| O75711 | LLGVQAMPANRLSCYRKIL  | Negative |
| O75711 | ANRLSCYRKILKDHNCHNLP | Negative |
| O75711 | SCYRKILKDHNCHNLPEGVA | Negative |
| O75711 | RLSCYRKILKDHNCHNLPEG | Negative |
| O75711 | PANRLSCYRKILKDHNCHNL | Negative |

|        |                      |          |
|--------|----------------------|----------|
| O75711 | VFTIGLTLLLGVQAMPANRL | Negative |
| O75711 | VQAMPANRLSCYRKILKDHN | Negative |
| O75711 | TIGLTLLLGVQAMPANRLSC | Negative |
| O75711 | MVLVFTIGLTLLLGVQAMPA | Negative |
| O75711 | RKILKDHNCHNLPEGVADLT | Negative |
| O75711 | KLMVLVFTIGLTLLLGVQAM | Negative |
| O75711 | LGVQAMPANRLSCYRKILKD | Negative |
| O75711 | GVQAMPANRLSCYRKILKDH | Negative |
| O75711 | TLLLGVQAMPANRLSCYRKI | Negative |
| O75711 | LMVLVFTIGLTLLLGVQAMP | Negative |
| O76076 | LLSKVRTQLCPTPCTCPWPP | Negative |
| O76076 | SKVRTQLCPTPCTCPWPPPR | Negative |
| O76076 | TPKTHLLAFSLLCLLSKVRT | Negative |
| O76076 | LCPTPCTCPWPPRCPLGVP  | Negative |
| O76076 | LAFSLLCLLSKVRTQLCPTP | Negative |
| O76076 | LSKVRTQLCPTPCTCPWPPP | Negative |
| O76076 | PCTCPWPPRCPLGVPLVLD  | Negative |
| O76076 | VRTQLCPTPCTCPWPPRCPC | Negative |
| O76076 | QLCPTPCTCPWPPRCPLGV  | Negative |
| O76076 | CLLSKVRTQLCPTPCTCPWP | Negative |
| O76076 | TPCTCPWPPRCPLGVPLVL  | Negative |
| O76076 | KTHLLAFSLLCLLSKVRTQL | Negative |
| O76076 | PTPCTCPWPPRCPLGVPLV  | Negative |
| O76076 | RGTPKTHLLAFSLLCLLSKV | Negative |
| O76076 | TQLCPTPCTCPWPPRCPLG  | Negative |
| O76076 | LCLLSKVRTQLCPTPCTCPW | Negative |
| O76076 | CTCPWPPRCPLGVPLVLDG  | Negative |
| O76076 | FSLCLLSKVRTQLCPTPCT  | Negative |
| O76076 | KVRTQLCPTPCTCPWPPRC  | Negative |
| O76076 | MRGTPKTHLLAFSLLCLLSK | Negative |
| O76076 | HLLAFSLLCLLSKVRTQLCP | Negative |
| O76076 | GTPKTHLLAFSLLCLLSKVR | Negative |
| O76076 | THLLAFSLLCLLSKVRTQLC | Negative |
| O76076 | SLLCLLSKVRTQLCPTPCTC | Negative |
| O76076 | AFSLLCLLSKVRTQLCPTPC | Negative |
| O76076 | PKTHLLAFSLLCLLSKVRTQ | Negative |
| O76076 | CPTPCTCPWPPRCPLGVPL  | Negative |
| O76076 | LLCLLSKVRTQLCPTPCTCP | Negative |
| O76076 | RTQLCPTPCTCPWPPRCPL  | Negative |
| O76192 | FLSFVALSSAGFVWVDDDN  | Negative |
| O76192 | FVALSSAGFVWVDDDNNSFP | Negative |
| O76192 | DDNNSFPKLRQLYVPPLQP  | Negative |
| O76192 | FPKLRQLYVPPLQPPLPN   | Negative |
| O76192 | VWVDDDNNSFPKLRQLYVPP | Negative |
| O76192 | FVWVDDDNNSFPKLRQLYVP | Negative |
| O76192 | IFLSFVALSSAGFVWVDDDN | Negative |

|        |                      |          |
|--------|----------------------|----------|
| O76192 | VALSSAGFVWVDDDNNSFPK | Negative |
| O76192 | LSSAGFVWVDDDNNSFPKLR | Negative |
| O76192 | VDDDNNSFPKLRQLYVPPLP | Negative |
| O76192 | GFVWVDDDNNSFPKLRQLYV | Negative |
| O76192 | SSAGFVWVDDDNNSFPKLRQ | Negative |
| O76192 | ALSSAGFVWVDDDNNSFPKL | Negative |
| O76192 | LSFVALSSAGFVWVDDDNNS | Negative |
| O76192 | LIFLSFVALSSAGFVWVDDD | Negative |
| O76192 | KILIFLSFVALSSAGFVWVD | Negative |
| O76192 | NNSFPKLRQLYVPPLPQPPP | Negative |
| O76192 | PKLRQLYVPPLPQPPPLPNI | Negative |
| O76192 | WVDDDNNSFPKLRQLYVPPL | Negative |
| O76192 | SFVALSSAGFVWVDDDNNSF | Negative |
| O76192 | AGFVWVDDDNNSFPKLRQLY | Negative |
| O76192 | NSFPKLRQLYVPPLPQPPPL | Negative |
| O76192 | MATKILIFLSFVALSSAGFV | Negative |
| O76192 | ATKILIFLSFVALSSAGFVW | Negative |
| O76192 | ILIFLSFVALSSAGFVWVDD | Negative |
| O76192 | DDDNNSFPKLRQLYVPPLPQ | Negative |
| O76192 | SAGFVWVDDDNNSFPKLRQL | Negative |
| O76192 | DNNSFPKLRQLYVPPLPQPP | Negative |
| O76192 | SFPKLRQLYVPPLPQPPPLP | Negative |
| O76537 | VLFFVFVTVSGDCGVVTKDE | Negative |
| O76537 | TVSGDCGVVTKDEWDGLTPI | Negative |
| O76537 | FVFVTVSGDCGVVTKDEWDG | Negative |
| O76537 | FVTVSGDCGVVTKDEWDGLT | Negative |
| O76537 | FFVFVTVSGDCGVVTKDEWD | Negative |
| O76537 | DGLTPIHVEYLARPVELVII | Negative |
| O76537 | LFVLFFVFVTVSGDCGVVTK | Negative |
| O76537 | TPIHVEYLARPVELVIIQHT | Negative |
| O76537 | GVVTKDEWDGLTPIHVEYLA | Negative |
| O76537 | WDGLTPIHVEYLARPVELVI | Negative |
| O76537 | CGVVTKDEWDGLTPIHVEYL | Negative |
| O76537 | LFFVFVTVSGDCGVVTKDEW | Negative |
| O76537 | VSGDCGVVTKDEWDGLTPIH | Negative |
| O76537 | DCGVVTKDEWDGLTPIHVEY | Negative |
| O76537 | VTKDEWDGLTPIHVEYLARP | Negative |
| O76537 | GLTPIHVEYLARPVELVIIQ | Negative |
| O76537 | VTVSGDCGVVTKDEWDGLTP | Negative |
| O76537 | GDCGVVTKDEWDGLTPIHVE | Negative |
| O76537 | ILFVLFFVFVTVSGDCGVVT | Negative |
| O76537 | SGDCGVVTKDEWDGLTPIHV | Negative |
| O76537 | EWDGLTPIHVEYLARPVELV | Negative |
| O76537 | MEILFVLFFVFVTVSGDCGV | Negative |
| O76537 | KDEWDGLTPIHVEYLARPVE | Negative |
| O76537 | LTPIHVEYLARPVELVIIQH | Negative |

|        |                       |          |
|--------|-----------------------|----------|
| O76537 | FVLFFVFVTVSGDCGVVTKD  | Negative |
| O76537 | VFVTVSGDCGVVTKDEWDGL  | Negative |
| O76537 | VVTKDEWDGLTPIHVEYLAR  | Negative |
| O76537 | DEWDGLTPIHVEYLARPVEL  | Negative |
| O76537 | TKDEWDGLTPIHVEYLARPV  | Negative |
| O76942 | SKILSASIALMKLENVYSAT  | Negative |
| O76942 | NAYGLTPGQQGMAQQPSYVL  | Negative |
| O76942 | ALMKLENVYSATALCSNAYG  | Negative |
| O76942 | MKLENVYSATALCSNAYGLT  | Negative |
| O76942 | ATALCSNAYGLTPGQQGMAQ  | Negative |
| O76942 | NVYSATALCSNAYGLTPGQQ  | Negative |
| O76942 | ISKILSASIALMKLENVYSA  | Negative |
| O76942 | ILSASIALMKLENVYSATAL  | Negative |
| O76942 | MKGISKILSASIALMKLENV  | Negative |
| O76942 | SIALMKLENVYSATALCSNA  | Negative |
| O76942 | LCSNAYGLTPGQQGMAQQPS  | Negative |
| O76942 | KGISKILSASIALMKLENVY  | Negative |
| O76942 | YSATALCSNAYGLTPGQQGM  | Negative |
| O76942 | AYGLTPGQQGMAQQPSYVLI  | Negative |
| O76942 | ENVYSATALCSNAYGLTPGQ  | Negative |
| O76942 | VYSATALCSNAYGLTPGQQG  | Negative |
| O76942 | SATALCSNAYGLTPGQQGMA  | Negative |
| O76942 | TALCSNAYGLTPGQQGMAQQ  | Negative |
| O76942 | CSNAYGLTPGQQGMAQQPSY  | Negative |
| O76942 | LENVYSATALCSNAYGLTPG  | Negative |
| O76942 | KILSASIALMKLENVYSATA  | Negative |
| O76942 | SASIALMKLENVYSATALCS  | Negative |
| O76942 | ALCSNAYGLTPGQQGMAQQP  | Negative |
| O76942 | GISKILSASIALMKLENVYS  | Negative |
| O76942 | LMKLENVYSATALCSNAYGL  | Negative |
| O76942 | ASIALMKLENVYSATALCSN  | Negative |
| O76942 | SNAYGLTPGQQGMAQQPSYV  | Negative |
| O76942 | IALMKLENVYSATALCSNAY  | Negative |
| O76942 | KLENVYSATALCSNAYGLTP  | Negative |
| O77061 | LGIACQGAIVRENSPRNLEK  | Negative |
| O77061 | PRNLEKSLNVIHEWKYFDYD  | Negative |
| O77061 | NSPRNLEKSLNVIHEWKYFD  | Negative |
| O77061 | SPRNLEKSLNVIHEWKYFDY  | Negative |
| O77061 | TRWLFMVACLGIAACQGAIVR | Negative |
| O77061 | IVRENSPRNLEKSLNVIHEW  | Negative |
| O77061 | EKSLNVIHEWKYFDYDFGSE  | Negative |
| O77061 | WLFMVACLGIAACQGAIVREN | Negative |
| O77061 | ACQGAIVRENSPRNLEKSLN  | Negative |
| O77061 | MTRWLFMVACLGIAACQGAIV | Negative |
| O77061 | VRENSPRNLEKSLNVIHEWK  | Negative |
| O77061 | ACLGIAACQGAIVRENSPRNL | Negative |

|        |                       |          |
|--------|-----------------------|----------|
| O77061 | GAIVRENSPRNLEKSLNVIH  | Negative |
| O77061 | NLEKSLNVIHEWKYFDYDFG  | Negative |
| O77061 | CLGIACQGAIVRENSPRNLE  | Negative |
| O77061 | QGAIVRENSPRNLEKSLNVI  | Negative |
| O77061 | ENSPRNLEKSLNVIHEWKYF  | Negative |
| O77061 | RENSPRNLEKSLNVIHEWKY  | Negative |
| O77061 | IACQGAIVRENSPRNLEKSL  | Negative |
| O77061 | FMVACLGIAACQGAIVRENSP | Negative |
| O77061 | AIVRENSPRNLEKSLNVIHE  | Negative |
| O77061 | GIACQGAIVRENSPRNLEKS  | Negative |
| O77061 | CQGAIVRENSPRNLEKSLNV  | Negative |
| O77061 | LFMVACLGIAACQGAIVRENS | Negative |
| O77061 | LEKSLNVIHEWKYFDYDFGS  | Negative |
| O77061 | MVACLGIAACQGAIVRENSPR | Negative |
| O77061 | RNLEKSLNVIHEWKYFDYDF  | Negative |
| O77061 | KSLNVIHEWKYFDYDFGSEE  | Negative |
| O77061 | VACLGIAACQGAIVRENSPRN | Negative |
| O77463 | ADSKGCKITCFLTAAGYCNT  | Negative |
| O77463 | GREGYPADSKGCKITCFLTA  | Negative |
| O77463 | ISCLLLIDIVVGGREGYPAD  | Negative |
| O77463 | GYPADSKGCKITCFLTAAGY  | Negative |
| O77463 | LLIDIVVGGREGYPADSKG   | Negative |
| O77463 | RMILFISCLLLIDIVVGGRE  | Negative |
| O77463 | EGYPADSKGCKITCFLTAAG  | Negative |
| O77463 | IVVGGREGYPADSKGCKITC  | Negative |
| O77463 | SCLLLIDIVVGGREGYPADS  | Negative |
| O77463 | GGREGYPADSKGCKITCFLT  | Negative |
| O77463 | LIDIVVGGREGYPADSKGCK  | Negative |
| O77463 | KGCKITCFLTAAGYCNTCT   | Negative |
| O77463 | DSKGCKITCFLTAAGYCNT   | Negative |
| O77463 | MKRMILFISCLLLIDIVVGG  | Negative |
| O77463 | VGGREGYPADSKGCKITCFL  | Negative |
| O77463 | VVGGREGYPADSKGCKITCF  | Negative |
| O77463 | SKGCKITCFLTAAGYCNTCT  | Negative |
| O77463 | YPADSKGCKITCFLTAAGYC  | Negative |
| O77463 | KRMILFISCLLLIDIVVGGR  | Negative |
| O77463 | PADSKGCKITCFLTAAGYCN  | Negative |
| O77463 | MILFISCLLLIDIVVGGREG  | Negative |
| O77463 | LLIDIVVGGREGYPADSKGC  | Negative |
| O77463 | CLLLIDIVVGGREGYPADSK  | Negative |
| O77463 | IDIVVGGREGYPADSKGCKI  | Negative |
| O77463 | LFISCLLLIDIVVGGREGYP  | Negative |
| O77463 | DIVVGGREGYPADSKGCKIT  | Negative |
| O77463 | FISCLLLIDIVVGGREGYP   | Negative |
| O77463 | REGYPADSKGCKITCFLTA   | Negative |
| O77463 | GCKITCFLTAAGYCNTCT    | Negative |

|        |                       |          |
|--------|-----------------------|----------|
| O77541 | LFL LAVFYSSDSSLMCYHCL | Negative |
| O77541 | VHLLLRLLFLLAVFYSSDSS  | Negative |
| O77541 | MCYHCLLPSPNCSTVTNCTP  | Negative |
| O77541 | LLRLLFLLAVFYSSDSSLM   | Negative |
| O77541 | YHCLLPSPNCSTVTNCTPNH  | Negative |
| O77541 | SSLMCYHCLLPSPNCSTVTN  | Negative |
| O77541 | SRGVHLLLRLLFLLAVFYSS  | Negative |
| O77541 | SDSSLMCYHCLLPSPNCSTV  | Negative |
| O77541 | CYHCLLPSPNCSTVTNCTPN  | Negative |
| O77541 | RLLFLLAVFYSSDSSLMCYH  | Negative |
| O77541 | LAVFYSSDSSLMCYHCLLP   | Negative |
| O77541 | LLRLLFLLAVFYSSDSSLMC  | Negative |
| O77541 | FLLAVFYSSDSSLMCYHCLL  | Negative |
| O77541 | HCLLPSPNCSTVTNCTPNHD  | Negative |
| O77541 | SSDSSLMCYHCLLPSPNCST  | Negative |
| O77541 | YSSDSSLMCYHCLLPSPNCS  | Negative |
| O77541 | FYSSDSSLMCYHCLLPSPNC  | Negative |
| O77541 | TSRGVHLLLRLLFLLAVFY   | Negative |
| O77541 | LMCYHCLLPSPNCSTVTNCT  | Negative |
| O77541 | RGVHLLLRLLFLLAVFYSSD  | Negative |
| O77541 | MTSRGVHLLLRLLFLLAVFY  | Negative |
| O77541 | AVFYSSDSSLMCYHCLLPSP  | Negative |
| O77541 | LLAVFYSSDSSLMCYHCLLP  | Negative |
| O77541 | DSSLMCYHCLLPSPNCSTVT  | Negative |
| O77541 | LLFLLAVFYSSDSSLMCYHC  | Negative |
| O77541 | GVHLLLRLLFLLAVFYSSDS  | Negative |
| O77541 | SLMCYHCLLPSPNCSTVTNC  | Negative |
| O77541 | VFYSSDSSLMCYHCLLPSPN  | Negative |
| O77541 | HLLLRLLFLLAVFYSSDSSL  | Negative |
| O77801 | APEKLCGHHFVRALVRLCGG  | Negative |
| O77801 | VLLGPALAIALGPAAAEAP   | Negative |
| O77801 | GPAAAEAPEKLCGHHFVRA   | Negative |
| O77801 | PLTWALVLLGPALAIALGPA  | Negative |
| O77801 | PEKLCGHHFVRALVRLCGGP  | Negative |
| O77801 | LAIALGPAAAEAPEKLCGH   | Negative |
| O77801 | WALVLLGPALAIALGPAAQ   | Negative |
| O77801 | IALGPAAAEAPEKLCGHHF   | Negative |
| O77801 | QEAPEKLCGHHFVRALVRLC  | Negative |
| O77801 | PALAIALGPAAAEAPEKLC   | Negative |
| O77801 | AAQEAPEKLCGHHFVRALVR  | Negative |
| O77801 | MDRRPLTWALVLLGPALAI   | Negative |
| O77801 | LGPALAIALGPAAAEAPEK   | Negative |
| O77801 | LGPAAAQEAPEKLCGHHFVR  | Negative |
| O77801 | ALVLLGPALAIALGPAAQE   | Negative |
| O77801 | GPALAIALGPAAAEAPEKL   | Negative |
| O77801 | AAAEAPEKLCGHHFVRALV   | Negative |



|        |                      |          |
|--------|----------------------|----------|
| O77801 | LLGPALAIALGPAAAEAPE  | Negative |
| O77801 | ALAIALGPAAAEAPEKLCG  | Negative |
| O77801 | LVLLGPALAIALGPAAQEA  | Negative |
| O77801 | EAPKLCGHHFVRALVRLCG  | Negative |
| O77801 | RPLTWALVLLGPALAIALGP | Negative |
| O77801 | RRPLTWALVLLGPALAIALG | Negative |
| O77801 | PAAAEAPEKLCGHHFVRAL  | Negative |
| O77801 | AIALGPAAAEAPEKLCGHH  | Negative |
| O77801 | DRRPLTWALVLLGPALAIAL | Negative |
| O77801 | AQEAPEKLCGHHFVRALVRL | Negative |
| O77801 | ALGPAAAEAPEKLCGHHFV  | Negative |
| O77801 | LTWALVLLGPALAIALGPAA | Negative |
| O80323 | VHVMMVFLIVLILCSSTV   | Negative |
| O80323 | FTQQYQLAVCNSNRTLCKDP | Negative |
| O80323 | TVGYDYFQFTQQYQLAVCNS | Negative |
| O80323 | FQFTQQYQLAVCNSNRTLCK | Negative |
| O80323 | QFTQQYQLAVCNSNRTLCKD | Negative |
| O80323 | MVFLIVLILCSSTVGYDYF  | Negative |
| O80323 | GYDYFQFTQQYQLAVCNSNR | Negative |
| O80323 | CSSTVGYDYFQFTQQYQLAV | Negative |
| O80323 | YDYFQFTQQYQLAVCNSNRT | Negative |
| O80323 | MVHVMMVFLIVLILCSST   | Negative |
| O80323 | VVMMVFLIVLILCSSTVGY  | Negative |
| O80323 | YFQFTQQYQLAVCNSNRLC  | Negative |
| O80323 | LILCSSTVGYDYFQFTQQYQ | Negative |
| O80323 | DYFQFTQQYQLAVCNSNRTL | Negative |
| O80323 | LLIVLILCSSTVGYDYFQFT | Negative |
| O80323 | VMMVFLIVLILCSSTVGYD  | Negative |
| O80323 | LIVLILCSSTVGYDYFQFTQ | Negative |
| O80323 | IVLILCSSTVGYDYFQFTQQ | Negative |
| O80323 | MMVFLIVLILCSSTVGYDY  | Negative |
| O80323 | QQYQLAVCNSNRTLCKDPPD | Negative |
| O80323 | ILCSSTVGYDYFQFTQQYQL | Negative |
| O80323 | STVGYDYFQFTQQYQLAVCN | Negative |
| O80323 | VGYDYFQFTQQYQLAVCNSN | Negative |
| O80323 | LCSSTVGYDYFQFTQQYQLA | Negative |
| O80323 | SSTVGYDYFQFTQQYQLAVC | Negative |
| O80323 | HVVMMVFLIVLILCSSTVG  | Negative |
| O80323 | TQQYQLAVCNSNRTLCKDPP | Negative |
| O80323 | FLIVLILCSSTVGYDYFQF  | Negative |
| O80323 | VLILCSSTVGYDYFQFTQQY | Negative |
| O80327 | TNKPNTVWPGTLTGGGGPQ  | Negative |
| O80327 | SAKFTFTNKCPNTVWPGTLT | Negative |
| O80327 | YSAKFTFTNKCPNTVWPGTL | Negative |
| O80327 | NKPNTVWPGTLTGGGGPQL  | Negative |
| O80327 | KFTFTNKCPNTVWPGTLTGG | Negative |

|        |                       |          |
|--------|-----------------------|----------|
| O80327 | LVLVFLSEHAGVYSAKFTFT  | Negative |
| O80327 | FTNKCPNTVWPGTLTGGGGP  | Negative |
| O80327 | KCPNTVWPGTLTGGGGPQLL  | Negative |
| O80327 | EALIGLVLVFLSEHAGVYSA  | Negative |
| O80327 | VLVFLSEHAGVYSAKFTFTN  | Negative |
| O80327 | VYSAKFTFTNKCNTVWPGT   | Negative |
| O80327 | FEALIGLVLVFLSEHAGVYS  | Negative |
| O80327 | FTFTNKCNTVWPGTLTGGG   | Negative |
| O80327 | SEHAGVYSAKFTFTNKCNT   | Negative |
| O80327 | LVFLSEHAGVYSAKFTFTNK  | Negative |
| O80327 | AKFTFTNKCNTVWPGTLTG   | Negative |
| O80327 | AGVYSAKFTFTNKCNTVWP   | Negative |
| O80327 | VFLSEHAGVYSAKFTFTNKC  | Negative |
| O80327 | FLSEHAGVYSAKFTFTNKC   | Negative |
| O80327 | HAGVYSAKFTFTNKCNTVW   | Negative |
| O80327 | EHAGVYSAKFTFTNKCNTV   | Negative |
| O80327 | ALIGLVLVFLSEHAGVYSAK  | Negative |
| O80327 | MKFEALIGLVLVFLSEHAGV  | Negative |
| O80327 | TFTNKCNTVWPGTLTGGGG   | Negative |
| O80327 | IGLVLVFLSEHAGVYSAKFT  | Negative |
| O80327 | LIGLVLVFLSEHAGVYSAKF  | Negative |
| O80327 | GVYSAKFTFTNKCNTVWPG   | Negative |
| O80327 | LSEHAGVYSAKFTFTNKCNT  | Negative |
| O80327 | KFEALIGLVLVFLSEHAGVY  | Negative |
| O82337 | VFAVILSLAGAQSLAPAPAP  | Negative |
| O82337 | LAGAQSLAPAPAPTSIDGTSI | Negative |
| O82337 | ALFSFVFAVILSLAGAQSLA  | Negative |
| O82337 | SVTGFALFSFVFAVILSLAG  | Negative |
| O82337 | MASRNSVTGFALFSFVFAVI  | Negative |
| O82337 | SRNSVTGFALFSFVFAVILS  | Negative |
| O82337 | NSVTGFALFSFVFAVILSLA  | Negative |
| O82337 | GFALFSFVFAVILSLAGAQSL | Negative |
| O82337 | VILSLAGAQSLAPAPAPTSID | Negative |
| O82337 | TGFALFSFVFAVILSLAGAQ  | Negative |
| O82337 | SFVFAVILSLAGAQSLAPAP  | Negative |
| O82337 | AGAQSLAPAPAPTSIDGTSID | Negative |
| O82337 | SLAGAQSLAPAPAPTSIDGTS | Negative |
| O82337 | FALFSFVFAVILSLAGAQSL  | Negative |
| O82337 | GAQSLAPAPAPTSIDGTSIDQ | Negative |
| O82337 | RNSVTGFALFSFVFAVILSL  | Negative |
| O82337 | FAVILSLAGAQSLAPAPAPT  | Negative |
| O82337 | ASRNSVTGFALFSFVFAVIL  | Negative |
| O82337 | SLAPAPAPTSIDGTSIDQGI  | Negative |
| O82337 | FSFVFAVILSLAGAQSLAPA  | Negative |
| O82337 | APAPAPTSIDGTSIDQGIAYL | Negative |
| O82337 | FVFAVILSLAGAQSLAPAPA  | Negative |

|        |                       |          |
|--------|-----------------------|----------|
| O82337 | LAPAPAPTSIDGTSIDQGIAY | Negative |
| O82337 | AVILSLAGAQSLAPAPAPTS  | Negative |
| O82337 | LSLAGAQSLAPAPAPTSIDGT | Negative |
| O82337 | QSLAPAPAPTSIDGTSIDQGI | Negative |
| O82337 | AQSLAPAPAPTSIDGTSIDQG | Negative |
| O82337 | ILSLAGAQSLAPAPAPTSIDG | Negative |
| O82337 | VTGFALFSFVFAVILSLAGA  | Negative |
| O82833 | ALLVGIVYPAASGRGAVASA  | Negative |
| O82833 | KLVSAAALVMALLVGIVYPAA | Negative |
| O82833 | YPAASGRGAVASAASGTTVE  | Negative |
| O82833 | GIVYPAASGRGAVASAASGT  | Negative |
| O82833 | LVMALLVGIVYPAASGRGAV  | Negative |
| O82833 | FSWKKLVSAALVMALLVGIV  | Negative |
| O82833 | VYPAASGRGAVASAASGTTV  | Negative |
| O82833 | MALLVGIVYPAASGRGAVAS  | Negative |
| O82833 | SGRGAVASAASGTTVELVPT  | Negative |
| O82833 | LVSAALVMALLVGIVYPAAS  | Negative |
| O82833 | VMALLVGIVYPAASGRGAVA  | Negative |
| O82833 | VSAALVMALLVGIVYPAASG  | Negative |
| O82833 | SWKKLVSAALVMALLVGIVY  | Negative |
| O82833 | MRFSWKKLVSAALVMALLVG  | Negative |
| O82833 | VGIVYPAASGRGAVASAASG  | Negative |
| O82833 | WKKLVSAALVMALLVGIVYP  | Negative |
| O82833 | GRGAVASAASGTTVELVPTD  | Negative |
| O82833 | PAASGRGAVASAASGTTVEL  | Negative |
| O82833 | RGAVASAASGTTVELVPTDD  | Negative |
| O82833 | KKLVSAALVMALLVGIVYPA  | Negative |
| O82833 | ALVMALLVGIVYPAASGRGA  | Negative |
| O82833 | RFSWKKLVSAALVMALLVGI  | Negative |
| O82833 | LVGIVYPAASGRGAVASAAS  | Negative |
| O82833 | LLVGIVYPAASGRGAVASAA  | Negative |
| O82833 | AALVMALLVGIVYPAASGRG  | Negative |
| O82833 | GAVASAASGTTVELVPTDDA  | Negative |
| O82833 | AASGRGAVASAASGTTVELV  | Negative |
| O82833 | SAALVMALLVGIVYPAASGR  | Negative |
| O82833 | ASGRGAVASAASGTTVELVP  | Negative |
| O86308 | ATASIVAGMTLAGAAAVGFS  | Negative |
| O86308 | IVAGMTLAGAAAVGFSAPAQ  | Negative |
| O86308 | TTSATRSRRATASIVAGMTL  | Negative |
| O86308 | TMTLFTTSATRSRRATASIV  | Negative |
| O86308 | MTLAGAAAVGFSAPAQAATV  | Negative |
| O86308 | GMTLAGAAAVGFSAPAQAAT  | Negative |
| O86308 | RATASIVAGMTLAGAAAVGF  | Negative |
| O86308 | TASIVAGMTLAGAAAVGFS   | Negative |
| O86308 | RRATASIVAGMTLAGAAAVG  | Negative |
| O86308 | AGAAAVGFSAPAQAATVDTW  | Negative |

|        |                       |          |
|--------|-----------------------|----------|
| O86308 | AAAVGFSAPAQAATVDTWDR  | Negative |
| O86308 | ATRSRRATASIVAGMTLAGA  | Negative |
| O86308 | TSATRSRRATASIVAGMTLA  | Negative |
| O86308 | ASIVAGMTLAGAAAVGFSAP  | Negative |
| O86308 | GAAAVGFSAPAQAATVDTWD  | Negative |
| O86308 | VAGMTLAGAAAVGFSAPAQA  | Negative |
| O86308 | RSRRATASIVAGMTLAGAAA  | Negative |
| O86308 | TLAGAAAVGFSAPAQAATVD  | Negative |
| O86308 | DTMTLFTTSATRSRRATASI  | Negative |
| O86308 | TRSRRATASIVAGMTLAGAA  | Negative |
| O86308 | SIVAGMTLAGAAAVGFSAPA  | Negative |
| O86308 | MTLFTTSATRSRRATASIVA  | Negative |
| O86308 | TLFTTSATRSRRATASIVAG  | Negative |
| O86308 | LFTTSATRSRRATASIVAGM  | Negative |
| O86308 | FTTSATRSRRATASIVAGMT  | Negative |
| O86308 | AGMTLAGAAAVGFSAPAQAA  | Negative |
| O86308 | SATRSRRATASIVAGMTLAG  | Negative |
| O86308 | SRRATASIVAGMTLAGAAAV  | Negative |
| O86308 | MDTMTLFTTSATRSRRATAS  | Negative |
| O88093 | AVARGFIAVSEFARKCVHKS  | Negative |
| O88093 | MNRIYSLRYSAVARGFIAVS  | Negative |
| O88093 | SAVARGFIAVSEFARKCVHK  | Negative |
| O88093 | EFARKCVHKSVRRLCFPVLL  | Negative |
| O88093 | SEFARKCVHKSVRRLCFPVL  | Negative |
| O88093 | NRIYSLRYSAVARGFIAVSE  | Negative |
| O88093 | RYSAVARGFIAVSEFARKCV  | Negative |
| O88093 | ARKCVHKSVRRLCFPVLLLI  | Negative |
| O88093 | YSAVARGFIAVSEFARKCVH  | Negative |
| O88093 | AVSEFARKCVHKSVRRLCFP  | Negative |
| O88093 | VSEFARKCVHKSVRRLCFPV  | Negative |
| O88093 | ARGFIAVSEFARKCVHKSVR  | Negative |
| O88093 | GFIADVSEFARKCVHKSVRRL | Negative |
| O88093 | IAVSEFARKCVHKSVRRLCF  | Negative |
| O88093 | LRYSADVARGFIAVSEFARKC | Negative |
| O88093 | YSLRYSAVARGFIAVSEFAR  | Negative |
| O88093 | FIAVSEFARKCVHKSVRRLC  | Negative |
| O88093 | RGFIAVSEFARKCVHKSVRR  | Negative |
| O88093 | KSVRRLCFPVLLLPVLFSA   | Negative |
| O88093 | SLRYSAVARGFIAVSEFARK  | Negative |
| O88093 | CVHKSVRRLCFPVLLLPVL   | Negative |
| O88093 | VHKSVRRLCFPVLLLPVLF   | Negative |
| O88093 | VARGFIAVSEFARKCVHKSV  | Negative |
| O88093 | RIYSLRYSAVARGFIAVSEF  | Negative |
| O88093 | HKSVRRLCFPVLLLPVLF    | Negative |
| O88093 | RKCVHKSVRRLCFPVLLLP   | Negative |
| O88093 | KCVHKSVRRLCFPVLLLPV   | Negative |

|        |                        |          |
|--------|------------------------|----------|
| O88093 | FARKCVHKSVRRLCFPVLLL   | Negative |
| O88093 | SVRRLCFPVLLLIPVLFSA    | Negative |
| O88093 | IYSLRYSAVARGFIAVSEFA   | Negative |
| O88188 | LVWILTSPSSSDHGSSENGWP  | Negative |
| O88188 | WILTSPSSSDHGSSENGWPKH  | Negative |
| O88188 | ENGWPKHTACNSGGLEVYQ    | Negative |
| O88188 | VAAALLVWILTSPSSSDHGS   | Negative |
| O88188 | GWPKHTACNSGGLEVYQSC    | Negative |
| O88188 | MNGVAAALLVWILTSPSSSD   | Negative |
| O88188 | VWILTSPSSSDHGSSENGWPK  | Negative |
| O88188 | LTSPSSSDHGSSENGWPKHTA  | Negative |
| O88188 | LLVWILTSPSSSDHGSSENGW  | Negative |
| O88188 | PKHTACNSGGLEVYQSCDP    | Negative |
| O88188 | NGVAAALLVWILTSPSSSDH   | Negative |
| O88188 | SDHGSSENGWPKHTACNSGGL  | Negative |
| O88188 | DHGSSENGWPKHTACNSGGLE  | Negative |
| O88188 | HTACNSGGLEVYQSCDPLQ    | Negative |
| O88188 | PSSSDHGSSENGWPKHTACNS  | Negative |
| O88188 | TSPSSSDHGSSENGWPKHTAC  | Negative |
| O88188 | AALLVWILTSPSSSDHGSSENG | Negative |
| O88188 | NGWPKHTACNSGGLEVYQS    | Negative |
| O88188 | KHTACNSGGLEVYQSCDPL    | Negative |
| O88188 | ILTSPSSSDHGSSENGWPKHT  | Negative |
| O88188 | ALLVWILTSPSSSDHGSSENG  | Negative |
| O88188 | SSDHGSSENGWPKHTACNSGG  | Negative |
| O88188 | GVAAALLVWILTSPSSSDHG   | Negative |
| O88188 | WPKHTACNSGGLEVYQSCD    | Negative |
| O88188 | SPSSSDHGSSENGWPKHTACN  | Negative |
| O88188 | HGSSENGWPKHTACNSGGLEV  | Negative |
| O88188 | GSENGWPKHTACNSGGLEV    | Negative |
| O88188 | SSSDHGSSENGWPKHTACNSG  | Negative |
| O88188 | SENGWPKHTACNSGGLEVY    | Negative |
| O89093 | AEAASNYDCCLSYIQTPLPS   | Negative |
| O89093 | SNYDCCLSYIQTPLPSRAIV   | Negative |
| O89093 | RLLFLALAWVLLAHLCSQAE   | Negative |
| O89093 | GKRLFLALAWVLLAHLCSQ    | Negative |
| O89093 | AWVLLAHLCSQAEAAASNYDC  | Negative |
| O89093 | ALAWVLLAHLCSQAEAAASNY  | Negative |
| O89093 | LALAWVLLAHLCSQAEAAASN  | Negative |
| O89093 | ASNYDCCLSYIQTPLPSRAI   | Negative |
| O89093 | QAEAAASNYDCCLSYIQTPLP  | Negative |
| O89093 | LFLALAWVLLAHLCSQAEAA   | Negative |
| O89093 | EAASNYDCCLSYIQTPLPSR   | Negative |
| O89093 | GGKRLFLALAWVLLAHLCS    | Negative |
| O89093 | SQAEAAASNYDCCLSYIQTPL  | Negative |
| O89093 | NYDCCLSYIQTPLPSRAIVG   | Negative |

|        |                       |          |
|--------|-----------------------|----------|
| O89093 | WVLLAHLCSQAEAAASNYDCC | Negative |
| O89093 | LLFLALAWVLLAHLCSQAEA  | Negative |
| O89093 | ACGGKRLFLALAWVLLAHL   | Negative |
| O89093 | AHLCSQAEAAASNYDCCLSYI | Negative |
| O89093 | FLALAWVLLAHLCSQAEAAAS | Negative |
| O89093 | HLCSQAEAAASNYDCCLSYIQ | Negative |
| O89093 | KRLFLALAWVLLAHLCSQA   | Negative |
| O89093 | LCSQAEAAASNYDCCLSYIQT | Negative |
| O89093 | VLLAHLCSQAEAAASNYDCCL | Negative |
| O89093 | AASNYDCCLSYIQTPLPSRA  | Negative |
| O89093 | MACGGKRLFLALAWVLLAH   | Negative |
| O89093 | CGGKRLFLALAWVLLAHL    | Negative |
| O89093 | LLAHLCSQAEAAASNYDCCLS | Negative |
| O89093 | CSQAEAAASNYDCCLSYIQT  | Negative |
| O89093 | LAHLCSQAEAAASNYDCCLSY | Negative |
| O93233 | TQQVLYCPPTAPENVTEFV   | Negative |
| O93233 | CLVMSLNSYTQQVLYCPPT   | Negative |
| O93233 | SSVPSLLIACLVMSLNSYTQ  | Negative |
| O93233 | PSLLIACLVMSLNSYTQQVL  | Negative |
| O93233 | SLLIACLVMSLNSYTQQVLY  | Negative |
| O93233 | ACLVMSLNSYTQQVLYCPPT  | Negative |
| O93233 | TPAPENVTEFVCNSPSLHEF  | Negative |
| O93233 | LYCPPTAPENVTEFVCNSP   | Negative |
| O93233 | QQVLYCPPTAPENVTEFVC   | Negative |
| O93233 | LNSYTQQVLYCPPTAPENV   | Negative |
| O93233 | LVMSLNSYTQQVLYCPPTPA  | Negative |
| O93233 | SLNSYTQQVLYCPPTAPEN   | Negative |
| O93233 | YCPPTAPENVTEFVCNSPS   | Negative |
| O93233 | YTQQVLYCPPTAPENVTEF   | Negative |
| O93233 | VMSLNSYTQQVLYCPPTAP   | Negative |
| O93233 | VPSLLIACLVMSLNSYTQQV  | Negative |
| O93233 | MSLNSYTQQVLYCPPTAPE   | Negative |
| O93233 | IACLVMSLNSYTQQVLYCPP  | Negative |
| O93233 | MKSSVPSLLIACLVMSLNSY  | Negative |
| O93233 | PPTAPENVTEFVCNSPSLH   | Negative |
| O93233 | SVPSLLIACLVMSLNSYTQQ  | Negative |
| O93233 | LLIACLVMSLNSYTQQVLYC  | Negative |
| O93233 | PTAPENVTEFVCNSPSLHE   | Negative |
| O93233 | VLYCPPTAPENVTEFVCNS   | Negative |
| O93233 | QVLYCPPTAPENVTEFVCN   | Negative |
| O93233 | NSYTQQVLYCPPTAPENV    | Negative |
| O93233 | CPPTAPENVTEFVCNSPSL   | Negative |
| O93233 | KSSVPSLLIACLVMSLNSYT  | Negative |
| O93233 | SYTQQVLYCPPTAPENVTE   | Negative |
| O93426 | MGRFIFVSFGLLVFLSLSG   | Negative |
| O93426 | GLHCPSDWYYYDQHCYRIFN  | Negative |

|        |                      |          |
|--------|----------------------|----------|
| O93426 | LVLFLSLSGTGAGLHCPSDW | Negative |
| O93426 | LLVLFLSLSGTGAGLHCPSD | Negative |
| O93426 | LSGTGAGLHCPSDWYYDQH  | Negative |
| O93426 | PSDWYYDQHHCYRIFNEEMN | Negative |
| O93426 | GAGLHCPSDWYYDQHCYRI  | Negative |
| O93426 | HCPSDWYYDQHCYRIFNEE  | Negative |
| O93426 | FVSFGLLVLFLSLSGTGAGL | Negative |
| O93426 | VLFLSLSGTGAGLHCPSDWY | Negative |
| O93426 | FIFVSFGLLVLFLSLSGTGA | Negative |
| O93426 | RFIFVSFGLLVLFLSLSGTG | Negative |
| O93426 | DWYYDQHCYRIFNEEMNWE  | Negative |
| O93426 | VSFGLLVLFLSLSGTGAGLH | Negative |
| O93426 | SDWYYDQHCYRIFNEEMNW  | Negative |
| O93426 | TGAGLHCPSDWYYDQHCYR  | Negative |
| O93426 | LSLSGTGAGLHCPSDWYYD  | Negative |
| O93426 | SLSGTGAGLHCPSDWYYDQ  | Negative |
| O93426 | GRFIFVSFGLLVLFLSLSGT | Negative |
| O93426 | SFGLLVLFLSLSGTGAGLHC | Negative |
| O93426 | LHCPSDWYYDQHCYRIFNE  | Negative |
| O93426 | LFLSLSGTGAGLHCPSDWYY | Negative |
| O93426 | GTGAGLHCPSDWYYDQHCY  | Negative |
| O93426 | SGTGAGLHCPSDWYYDQHC  | Negative |
| O93426 | GLLVLFLSLSGTGAGLHCP  | Negative |
| O93426 | AGLHCPSDWYYDQHCYRIF  | Negative |
| O93426 | IFVSFGLLVLFLSLSGTGAG | Negative |
| O93426 | FLSLSGTGAGLHCPSDWYYY | Negative |
| O93426 | CPSDWYYDQHCYRIFNEEM  | Negative |
| O93427 | EAGFCCPSHWSSYDRYCYKV | Negative |
| O93427 | VSFGLLVVFLSLSGSEAGFC | Negative |
| O93427 | FLSLSGSEAGFCCPSHWSSY | Negative |
| O93427 | GFCCPSHWSSYDRYCYKVFK | Negative |
| O93427 | FVSFGLLVVFLSLSGSEAGF | Negative |
| O93427 | CPSHWSSYDRYCYKVFKQEM | Negative |
| O93427 | HWSSYDRYCYKVFKQEMTWA | Negative |
| O93427 | CCPSHWSSYDRYCYKVFKQE | Negative |
| O93427 | MGRFIFVSFGLLVVFLSLSG | Negative |
| O93427 | RFIFVSFGLLVVFLSLSGSE | Negative |
| O93427 | VVFLSLSGSEAGFCCPSHWS | Negative |
| O93427 | FCCPSHWSSYDRYCYKVFKQ | Negative |
| O93427 | LLVVFLSLSGSEAGFCCPSH | Negative |
| O93427 | GLLVVFLSLSGSEAGFCCPS | Negative |
| O93427 | PSHWSSYDRYCYKVFKQEMT | Negative |
| O93427 | SFGLLVVFLSLSGSEAGFCC | Negative |
| O93427 | SGSEAGFCCPSHWSSYDRYC | Negative |
| O93427 | LSLSGSEAGFCCPSHWSSYD | Negative |
| O93427 | SEAGFCCPSHWSSYDRYCYK | Negative |

|        |                        |          |
|--------|------------------------|----------|
| O93427 | GSEAGFCCPSHWSSYDRYCY   | Negative |
| O93427 | GRFIFVSFGLLVVFLSLSGS   | Negative |
| O93427 | IFVSFGLLVVFLSLSGSEAG   | Negative |
| O93427 | LSGSEAGFCCPSHWSSYDRY   | Negative |
| O93427 | LVVFLSLSGSEAGFCCPSHW   | Negative |
| O93427 | FIFVSFGLLVVFLSLSGSEA   | Negative |
| O93427 | SLSGSEAGFCCPSHWSSYDR   | Negative |
| O93427 | AGFCCPSHWSSYDRYCYKVF   | Negative |
| O93427 | SHWSSYDRYCYKVKQEMTW    | Negative |
| O93427 | VFLSLSGSEAGFCCPSHWSS   | Negative |
| O94907 | ALGAAGATRVFVAMVAAALG   | Negative |
| O94907 | FVAMVAAALGGHPLLGVSA    | Negative |
| O94907 | AAGATRVFVAMVAAALGGHP   | Negative |
| O94907 | LGGHPLLGVSA TLNSVLNSN  | Negative |
| O94907 | LGVSA TLNSVLNSNAIKNLP  | Negative |
| O94907 | LLGVSA TLNSVLNSNAIKNL  | Negative |
| O94907 | VAMVAAALGGHPLLGVSA TL  | Negative |
| O94907 | GHPLLGVSA TLNSVLNSNAI  | Negative |
| O94907 | MALGAAGATRVFVAMVAAAL   | Negative |
| O94907 | VSA TLNSVLNSNAIKNLPPP  | Negative |
| O94907 | AALGGHPLLGVSA TLNSVLN  | Negative |
| O94907 | AAALGGHPLLGVSA TLNSVL  | Negative |
| O94907 | MMALGAAGATRVFVAMVAAA   | Negative |
| O94907 | GVSA TLNSVLNSNAIKNLPP  | Negative |
| O94907 | ALGGHPLLGVSA TLNSVLNS  | Negative |
| O94907 | AGATRVFVAMVAAALGGHPL   | Negative |
| O94907 | SATLNSVLNSNAIKNLPPPL   | Negative |
| O94907 | GAAGATRVFVAMVAAALGGH   | Negative |
| O94907 | AMVAAALGGHPLLGVSA TLN  | Negative |
| O94907 | GATRVFVAMVAAALGGHPLL   | Negative |
| O94907 | HPLLGVSA TLNSVLNSNAIK  | Negative |
| O94907 | ATRVFVAMVAAALGGHPLLG   | Negative |
| O94907 | MVAAALGGHPLLGVSA TLNS  | Negative |
| O94907 | LGAAGATRVFVAMVAAALGG   | Negative |
| O94907 | TRVFVAMVAAALGGHPLLGV   | Negative |
| O94907 | GGHPLLGVSA TLNSVLNSNA  | Negative |
| O94907 | PLLGVSA TLNSVLNSNAIKN  | Negative |
| O94907 | VFVAMVAAALGGHPLLGVSA   | Negative |
| O94907 | RVFVAMVAAALGGHPLLGVSA  | Negative |
| O95157 | FLVQGS LYL VICGQDDGPPG | Negative |
| O95157 | TRCCFVFLVQGS LYL VICGQ | Negative |
| O95157 | CFVFLVQGS LYL VICGQDDG | Negative |
| O95157 | SEDPERDDHEGQPRPRVPRK   | Negative |
| O95157 | LYLVICGQDDGPPGSEDPER   | Negative |
| O95157 | MQLTRCCFVFLVQGS LYLVI  | Negative |
| O95157 | VICGQDDGPPGSEDPERDDH   | Negative |



|        |                       |          |
|--------|-----------------------|----------|
| O95157 | GSEDPERDDHEGQPRPRVPR  | Negative |
| O95157 | PPGSEDPERDDHEGQPRPRV  | Negative |
| O95157 | DDGPPGSEDPERDDHEGQPR  | Negative |
| O95157 | QLTRCCFVFLVQGSYL VIC  | Negative |
| O95157 | VQGSYL VICGQDDGPPGSE  | Negative |
| O95157 | CGQDDGPPGSEDPERDDHEG  | Negative |
| O95157 | GQDDGPPGSEDPERDDHEGQ  | Negative |
| O95157 | QGSYL VICGQDDGPPGSED  | Negative |
| O95157 | CCFVFLVQGSYL VICGQDD  | Negative |
| O95157 | LTRCCFVFLVQGSYL VICG  | Negative |
| O95157 | VFLVQGSYL VICGQDDGPP  | Negative |
| O95157 | YL VICGQDDGPPGSEDPERD | Negative |
| O95157 | ICGQDDGPPGSEDPERDDHE  | Negative |
| O95157 | LVQGSYL VICGQDDGPPGS  | Negative |
| O95157 | PGSEDPERDDHEGQPRPRVP  | Negative |
| O95157 | DGPPGSEDPERDDHEGQPRP  | Negative |
| O95157 | QDDGPPGSEDPERDDHEGQP  | Negative |
| O95157 | GSLYL VICGQDDGPPGSEDP | Negative |
| O95157 | SLYL VICGQDDGPPGSEDP  | Negative |
| O95157 | RCCFVFLVQGSYL VICGQD  | Negative |
| O95157 | LVICGQDDGPPGSEDPERDD  | Negative |
| O95157 | GPPGSEDPERDDHEGQPRPR  | Negative |
| O95407 | GLSLLCLVLALPALLPVPAV  | Negative |
| O95407 | PAVRGVAETPTY PWRDAETG | Negative |
| O95407 | PALLPVPAVRGVAETPTY PW | Negative |
| O95407 | LCLVLALPALLPVPAVRGVA  | Negative |
| O95407 | LPVPAVRGVAETPTY PWRDA | Negative |
| O95407 | VAETPTY PWRDAETGERLVC | Negative |
| O95407 | RALEGPGLSLLCLVLALPAL  | Negative |
| O95407 | LSLLCLVLALPALLPVPAVR  | Negative |
| O95407 | LLPVPAVRGVAETPTY PWRD | Negative |
| O95407 | RGVAETPTY PWRDAETGERL | Negative |
| O95407 | LVLALPALLPVPAVRGVAET  | Negative |
| O95407 | LALPALLPVPAVRGVAETPT  | Negative |
| O95407 | PVPAVRGVAETPTY PWRDAE | Negative |
| O95407 | ALEGPGLSLLCLVLALPALL  | Negative |
| O95407 | GVAETPTY PWRDAETGERLV | Negative |
| O95407 | LEGPGLSLLCLVLALPALLP  | Negative |
| O95407 | ALLPVPAVRGVAETPTY PWR | Negative |
| O95407 | ALPALLPVPAVRGVAETPTY  | Negative |
| O95407 | EGPGLSLLCLVLALPALLPV  | Negative |
| O95407 | VPAVRGVAETPTY PWRDAET | Negative |
| O95407 | LLCLVLALPALLPVPAVRGV  | Negative |
| O95407 | MRALEGPGLSLLCLVLALPA  | Negative |
| O95407 | AVRGVAETPTY PWRDAETGE | Negative |
| O95407 | PGLSLLCLVLALPALLPVPA  | Negative |

|        |                       |          |
|--------|-----------------------|----------|
| O95407 | SLLCLVLALPALLPVPAVRG  | Negative |
| O95407 | VRGVAETPTYPWRDAETGER  | Negative |
| O95407 | CLVLALPALLPVPAVRGVAE  | Negative |
| O95407 | LPALLPVPAVRGVAETPTYP  | Negative |
| O95407 | GPGLSLLCLVLALPALLPVP  | Negative |
| O95633 | GSGNPAPGGVCWLQQGQEAT  | Negative |
| O95633 | SGNPAPGGVCWLQQGQEATC  | Negative |
| O95633 | WPLPWGALAWAVGFVSSMGS  | Negative |
| O95633 | MRPGAPGPLWPLPWGALAWA  | Negative |
| O95633 | PGAPGPLWPLPWGALAWAVG  | Negative |
| O95633 | GNPAPGGVCWLQQGQEATCS  | Negative |
| O95633 | LWPLPWGALAWAVGFVSSMG  | Negative |
| O95633 | LAWAVGFVSSMGSNGNPAPGG | Negative |
| O95633 | MGSGNPAPGGVCWLQQGQEA  | Negative |
| O95633 | GPLWPLPWGALAWAVGFVSS  | Negative |
| O95633 | VSSMGSNGNPAPGGVCWLQQG | Negative |
| O95633 | PLWPLPWGALAWAVGFVSSM  | Negative |
| O95633 | PGPLWPLPWGALAWAVGFVS  | Negative |
| O95633 | FVSSMGSNGNPAPGGVCWLQQ | Negative |
| O95633 | GALAWAVGFVSSMGSNGNPAP | Negative |
| O95633 | GAPGPLWPLPWGALAWAVGF  | Negative |
| O95633 | PWGALAWAVGFVSSMGSNGP  | Negative |
| O95633 | APGPLWPLPWGALAWAVGFV  | Negative |
| O95633 | PLPWGALAWAVGFVSSMGS   | Negative |
| O95633 | ALAWAVGFVSSMGSNGNPAPG | Negative |
| O95633 | GFVSSMGSNGNPAPGGVCWLQ | Negative |
| O95633 | AVGFVSSMGSNGNPAPGGVCW | Negative |
| O95633 | SMGSNGNPAPGGVCWLQQGQE | Negative |
| O95633 | SSMGSNGNPAPGGVCWLQQGQ | Negative |
| O95633 | WAVGFVSSMGSNGNPAPGGVC | Negative |
| O95633 | VGFVSSMGSNGNPAPGGVCWL | Negative |
| O95633 | AWAVGFVSSMGSNGNPAPGGV | Negative |
| O95633 | WGALAWAVGFVSSMGSNGNPA | Negative |
| O95633 | RPGAPGPLWPLPWGALAWAV  | Negative |
| O95711 | TATLFLWTLIFPSCSGGGGG  | Negative |
| O95711 | MKGFTATLFLWTLIFPSCSG  | Negative |
| O95711 | WTLIFPSCSGGGGGKAWPTH  | Negative |
| O95711 | TLIFPSCSGGGGGKAWPTHV  | Negative |
| O95711 | SGGGGGKAWPTHVVCSDSGL  | Negative |
| O95711 | FTATLFLWTLIFPSCSGGGG  | Negative |
| O95711 | GGGGKAWPTHVVCSDSGLEV  | Negative |
| O95711 | SCSGGGGGKAWPTHVVCSDS  | Negative |
| O95711 | LFLWTLIFPSCSGGGGGKAW  | Negative |
| O95711 | GGGGKAWPTHVVCSDSGLE   | Negative |
| O95711 | PSCSGGGGGKAWPTHVVCSD  | Negative |
| O95711 | TLFLWTLIFPSCSGGGGGKA  | Negative |

|        |                      |          |
|--------|----------------------|----------|
| O95711 | IFPSCSGGGGGKAWPTHVVC | Negative |
| O95711 | KAWPTHVVCSDSGLEVLYQS | Negative |
| O95711 | GGKAWPTHVVCSDSGLEVLY | Negative |
| O95711 | LIFPSCSGGGGGKAWPTHVV | Negative |
| O95711 | HVVCSDSGLEVLYQSCDPLQ | Negative |
| O95711 | WPTHVVCSDSGLEVLYQSCD | Negative |
| O95711 | THVVCSDSGLEVLYQSCDPL | Negative |
| O95711 | AWPTHVVCSDSGLEVLYQSC | Negative |
| O95711 | KGFTATLFLWTLIFPSCSGG | Negative |
| O95711 | CSGGGGGKAWPTHVVCSDSG | Negative |
| O95711 | PTHVVCSDSGLEVLYQSCDP | Negative |
| O95711 | FLWTLIFPSCSGGGGGKAWP | Negative |
| O95711 | GFTATLFLWTLIFPSCSGGG | Negative |
| O95711 | GGGKAWPTHVVCSDSGLEVL | Negative |
| O95711 | LWTLIFPSCSGGGGGKAWPT | Negative |
| O95711 | FPSCSGGGGGKAWPTHVVC  | Negative |
| O95711 | GKAWPTHVVCSDSGLEVLYQ | Negative |
| O95715 | LLLALYTARVDGSKCKCSRK | Negative |
| O95715 | PPVSMRLLAALLLLLLALY  | Negative |
| O95715 | TARVDGSKCKCSRKGPKIRY | Negative |
| O95715 | SMRLLAALLLLLLALYTAR  | Negative |
| O95715 | RRAPPVSMRLLAALLLLLL  | Negative |
| O95715 | VSMRLLAALLLLLLALYTA  | Negative |
| O95715 | LLLLALYTARVDGSKCKCS  | Negative |
| O95715 | LPRRAPPVSMRLLAALLLL  | Negative |
| O95715 | YTARVDGSKCKCSRKGPKIR | Negative |
| O95715 | MRLLAALLLLLLALYTARV  | Negative |
| O95715 | LAAALLLLLLALYTARVDGS | Negative |
| O95715 | ARVDGSKCKCSRKGPKIRYS | Negative |
| O95715 | AALLLLLLALYTARVDGSKC | Negative |
| O95715 | ALLLLLLALYTARVDGSKCK | Negative |
| O95715 | RAPPVSMRLLAALLLLLLA  | Negative |
| O95715 | PVSMRLLAALLLLLLALYT  | Negative |
| O95715 | SLLPRRAPPVSMRLLAALL  | Negative |
| O95715 | LYTARVDGSKCKCSRKGPKI | Negative |
| O95715 | AAALLLLLLALYTARVDGSK | Negative |
| O95715 | LLPRRAPPVSMRLLAALLL  | Negative |
| O95715 | LLALYTARVDGSKCKCSRKG | Negative |
| O95715 | LLAAALLLLLLALYTARVDG | Negative |
| O95715 | APPVSMRLLAALLLLLLAL  | Negative |
| O95715 | LALYTARVDGSKCKCSRKG  | Negative |
| O95715 | RLLAAALLLLLLALYTARVD | Negative |
| O95715 | MSLLPRRAPPVSMRLLAAL  | Negative |
| O95715 | PRRAPPVSMRLLAALLLLL  | Negative |
| O95715 | ALYTARVDGSKCKCSRKGPK | Negative |
| O95715 | LLLALYTARVDGSKCKCSR  | Negative |

|        |                      |          |
|--------|----------------------|----------|
| O95750 | DAGPHVHYGWGDPIRLRHL  | Negative |
| O95750 | AVAGRPLAFSDAGPHVHYGW | Negative |
| O95750 | AGLWLAVAGRPLAFSDAGPH | Negative |
| O95750 | SDAGPHVHYGWGDPIRLRHL | Negative |
| O95750 | MRS GCVVHVWILAGLWLAV | Negative |
| O95750 | HVWILAGLWLAVAGRPLAFS | Negative |
| O95750 | WILAGLWLAVAGRPLAFSDA | Negative |
| O95750 | VVVHVWILAGLWLAVAGRPL | Negative |
| O95750 | VHVWILAGLWLAVAGRPLAF | Negative |
| O95750 | RPLAFSDAGPHVHYGWGDPI | Negative |
| O95750 | CVVVHVWILAGLWLAVAGRP | Negative |
| O95750 | LAVAGRPLAFSDAGPHVHYG | Negative |
| O95750 | RSGCVVHVWILAGLWLAVA  | Negative |
| O95750 | SGCVVHVWILAGLWLAVAG  | Negative |
| O95750 | AFSDAGPHVHYGWGDPIRLR | Negative |
| O95750 | AGRPLAFSDAGPHVHYGWGD | Negative |
| O95750 | WLAVAGRPLAFSDAGPHVHY | Negative |
| O95750 | GRPLAFSDAGPHVHYGWGDP | Negative |
| O95750 | LAGLWLAVAGRPLAFSDAGP | Negative |
| O95750 | PLAFSDAGPHVHYGWGDPIR | Negative |
| O95750 | VAGRPLAFSDAGPHVHYGWG | Negative |
| O95750 | GLWLAVAGRPLAFSDAGPHV | Negative |
| O95750 | LWLAVAGRPLAFSDAGPHVH | Negative |
| O95750 | ILAGLWLAVAGRPLAFSDAG | Negative |
| O95750 | AGPHVHYGWGDPIRLRHL   | Negative |
| O95750 | FSDAGPHVHYGWGDPIRLRH | Negative |
| O95750 | GCVVHVWILAGLWLAVAGR  | Negative |
| O95750 | VHVWILAGLWLAVAGRPLA  | Negative |
| O95750 | LAFSDAGPHVHYGWGDPIRL | Negative |
| O95813 | QSSLSPVLLPRNQRELPTGN | Negative |
| O95813 | KTTRHQDGRQNQSSLSPVLL | Negative |
| O95813 | GRQNQSSLSPVLLPRNQREL | Negative |
| O95813 | GKTTRHQDGRQNQSSLSPVL | Negative |
| O95813 | DGRQNQSSLSPVLLPRNQRE | Negative |
| O95813 | TRHQDGRQNQSSLSPVLLPR | Negative |
| O95813 | LLFQLLVLLPLGKTTRHQDG | Negative |
| O95813 | RQNQSSLSPVLLPRNQRELP | Negative |
| O95813 | TTRHQDGRQNQSSLSPVLLP | Negative |
| O95813 | VLLPLGKTTRHQDGRQNQSS | Negative |
| O95813 | LLVLLPLGKTTRHQDGRQNQ | Negative |
| O95813 | PLGKTTRHQDGRQNQSSLSP | Negative |
| O95813 | SSLSPVLLPRNQRELPTGNH | Negative |
| O95813 | LVLLPLGKTTRHQDGRQNQS | Negative |
| O95813 | FQLLVLLPLGKTTRHQDGRQ | Negative |
| O95813 | LLPLGKTTRHQDGRQNQSSL | Negative |
| O95813 | QDGRQNQSSLSPVLLPRNQ  | Negative |

|        |                      |          |
|--------|----------------------|----------|
| O95813 | NQSSLSPVLLPRNQRELPTG | Negative |
| O95813 | LFQLLVLLPLGKTTRHQDGR | Negative |
| O95813 | SLSPVLLPRNQRELPTGNHE | Negative |
| O95813 | QLLVLLPLGKTTRHQDGRQN | Negative |
| O95813 | LSPVLLPRNQRELPTGNHEE | Negative |
| O95813 | HQDGRQNQSSLSPVLLPRNQ | Negative |
| O95813 | HLLLFQLLVLLPLGKTTRHQ | Negative |
| O95813 | MHLLLFQLLVLLPLGKTTRH | Negative |
| O95813 | LPLGKTTRHQDGRQNQSSLS | Negative |
| O95813 | QNQSSLSPVLLPRNQRELPT | Negative |
| O95813 | RHQDGRQNQSSLSPVLLPRN | Negative |
| O95813 | LGKTTRHQDGRQNQSSLSPV | Negative |
| O95881 | SDGHNGLGKGFGDHIHWRTL | Negative |
| O95881 | GLGKGFGDHIHWRTLEDGKK | Negative |
| O95881 | ISSDGHNGLGKGFGDHIHWR | Negative |
| O95881 | GATCLLGFSFLLLVISSDGH | Negative |
| O95881 | GHNGLGKGFGDHIHWRTLED | Negative |
| O95881 | HNGLGKGFGDHIHWRTLEDG | Negative |
| O95881 | TCLLGFSFLLLVISSDGHNG | Negative |
| O95881 | VISSDGHNGLGKGFGDHIHW | Negative |
| O95881 | GFSFLLLVISSDGHNGLGKG | Negative |
| O95881 | TRPRLGATCLLGFSFLLLVI | Negative |
| O95881 | LGKGFGDHIHWRTLEDGKKE | Negative |
| O95881 | RLGATCLLGFSFLLLVISSD | Negative |
| O95881 | CLLGFSFLLLVISSDGHNGL | Negative |
| O95881 | SFLLLVISSDGHNGLGKGFG | Negative |
| O95881 | LLVISSDGHNGLGKGFGDHI | Negative |
| O95881 | DGHNGLGKGFGDHIHWRTLE | Negative |
| O95881 | PRLGATCLLGFSFLLLVISS | Negative |
| O95881 | ETRPLGATCLLGFSFLLLVI | Negative |
| O95881 | ATCLLGFSFLLLVISSDGHN | Negative |
| O95881 | LVISSDGHNGLGKGFGDHIH | Negative |
| O95881 | METRPRLGATCLLGFSFLLL | Negative |
| O95881 | SSDGHNGLGKGFGDHIHWRT | Negative |
| O95881 | RPRLGATCLLGFSFLLLVIS | Negative |
| O95881 | LGATCLLGFSFLLLVISSDG | Negative |
| O95881 | FLLLVISSDGHNGLGKGFGD | Negative |
| O95881 | FSFLLLVISSDGHNGLGKGF | Negative |
| O95881 | NGLGKGFGDHIHWRTLEDGK | Negative |
| O95881 | LGFSFLLLVISSDGHNGLGK | Negative |
| O95881 | LLLVISSDGHNGLGKGFGDH | Negative |
| O95968 | CYRANAVVCQALGSEITGFL | Negative |
| O95968 | VCQALGSEITGFLLAGKPVF | Negative |
| O95968 | VCLLLLTLALCCYRANAVVC | Negative |
| O95968 | LGSEITGFLLAGKPVFKFQL | Negative |
| O95968 | SEITGFLLAGKPVFKFQLAK | Negative |

|        |                      |          |
|--------|----------------------|----------|
| O95968 | LCCYRANAVVCQALGSEITG | Negative |
| O95968 | SVCLLLLTLALCCYRANAVV | Negative |
| O95968 | NAVVCQALGSEITGFLLAGK | Negative |
| O95968 | MRLSVCLLLLTLALCCYRAN | Negative |
| O95968 | LALCCYRANAVVCQALGSEI | Negative |
| O95968 | RANAVVCQALGSEITGFLLA | Negative |
| O95968 | CCYRANAVVCQALGSEITGF | Negative |
| O95968 | GSEITGFLLAGKPVFKFQLA | Negative |
| O95968 | AVVCQALGSEITGFLLAGKP | Negative |
| O95968 | LSVCLLLLTLALCCYRANAV | Negative |
| O95968 | ANAVVCQALGSEITGFLLAG | Negative |
| O95968 | CLLLLTLALCCYRANAVVCQ | Negative |
| O95968 | TLALCCYRANAVVCQALGSE | Negative |
| O95968 | VVCQALGSEITGFLLAGKPV | Negative |
| O95968 | QALGSEITGFLLAGKPVFKF | Negative |
| O95968 | EITGFLLAGKPVFKFQLAKF | Negative |
| O95968 | YRANAVVCQALGSEITGFLL | Negative |
| O95968 | CQALGSEITGFLLAGKPVFK | Negative |
| O95968 | ALGSEITGFLLAGKPVFKFQ | Negative |
| O95968 | ALCCYRANAVVCQALGSEIT | Negative |
| O95968 | LLLTLALCCYRANAVVCQAL | Negative |
| O95968 | LLTLALCCYRANAVVCQALG | Negative |
| O95968 | LTLALCCYRANAVVCQALGS | Negative |
| O95968 | RLSVCLLLLTLALCCYRANA | Negative |
| O95994 | AKKDTKDSRPKLPQTLRGW  | Negative |
| O95994 | ARDTTVKPGAKKDTKDSRPK | Negative |
| O95994 | PVSAFLLLVALSYTLARDTT | Negative |
| O95994 | IPVSAFLLLVALSYTLARDT | Negative |
| O95994 | LLVALSYTLARDTTVKPGAK | Negative |
| O95994 | TVKPGAKKDTKDSRPKLPQT | Negative |
| O95994 | LLLVALSYTLARDTTVKPGA | Negative |
| O95994 | VALSYTLARDTTVKPGAKKD | Negative |
| O95994 | AFLLLVALSYTLARDTTVKP | Negative |
| O95994 | FLLLVALSYTLARDTTVKPG | Negative |
| O95994 | TTVKPGAKKDTKDSRPKLPQ | Negative |
| O95994 | VKPGAKKDTKDSRPKLPQTL | Negative |
| O95994 | EKIPVSAFLLLVALSYTLAR | Negative |
| O95994 | LARDTTVKPGAKKDTKDSRP | Negative |
| O95994 | DTTVKPGAKKDTKDSRPKLP | Negative |
| O95994 | YTLARDTTVKPGAKKDTKDS | Negative |
| O95994 | MEKIPVSAFLLLVALSYTLA | Negative |
| O95994 | KKDTKDSRPKLPQTLRGWG  | Negative |
| O95994 | RDTTVKPGAKKDTKDSRPKL | Negative |
| O95994 | SAFLLLVALSYTLARDTTVK | Negative |
| O95994 | GAKKDTKDSRPKLPQTLRG  | Negative |
| O95994 | LVALSYTLARDTTVKPGAKK | Negative |

|        |                       |          |
|--------|-----------------------|----------|
| O95994 | PGAKKDTKDSRPKLPQTLRS  | Negative |
| O95994 | ALSYTLARDTTVKPGAKKDT  | Negative |
| O95994 | KPGAKKDTKDSRPKLPQTLS  | Negative |
| O95994 | LSYTLARDTTVKPGAKKDTK  | Negative |
| O95994 | TLARDTTVKPGAKKDTKDSR  | Negative |
| O95994 | SYTLARDTTVKPGAKKDTKD  | Negative |
| O95994 | KIPVSAFLLLVALSYTLARD  | Negative |
| O95998 | WVLLLLCAHVVTLLVRATPVS | Negative |
| O95998 | RHNWTPDLSPLWVLLLLCAHV | Negative |
| O95998 | TLLVRATPVSQTTTAATASV  | Negative |
| O95998 | LCAHVVTLLVRATPVSQTTT  | Negative |
| O95998 | AHVVTLLVRATPVSQTTTAA  | Negative |
| O95998 | RATPVSQTTTAATASVRSTK  | Negative |
| O95998 | LWVLLLLCAHVVTLLVRATPV | Negative |
| O95998 | WTPDLSPLWVLLLLCAHVVTL | Negative |
| O95998 | LLCAHVVTLLVRATPVSQTT  | Negative |
| O95998 | LVRATPVSQTTTAATASVRS  | Negative |
| O95998 | VTLLVRATPVSQTTTAATAS  | Negative |
| O95998 | HNWTPDLSPLWVLLLLCAHV  | Negative |
| O95998 | SPLWVLLLLCAHVVTLLVRAT | Negative |
| O95998 | MTMRHNWTPDLSPLWVLLLC  | Negative |
| O95998 | NWTPDLSPLWVLLLLCAHVVT | Negative |
| O95998 | ATPVSQTTTAATASVRSTKD  | Negative |
| O95998 | PDLSPLWVLLLLCAHVVTLLV | Negative |
| O95998 | MRHNWTPDLSPLWVLLLLCAH | Negative |
| O95998 | VVTLLVRATPVSQTTTAATA  | Negative |
| O95998 | CAHVVTLLVRATPVSQTTTA  | Negative |
| O95998 | LSPLWVLLLLCAHVVTLLVRA | Negative |
| O95998 | LLCAHVVTLLVRATPVSQT   | Negative |
| O95998 | PLWVLLLLCAHVVTLLVRATP | Negative |
| O95998 | VRATPVSQTTTAATASVRST  | Negative |
| O95998 | TPDLSPLWVLLLLCAHVVTLL | Negative |
| O95998 | HVVVTLLVRATPVSQTTTAAT | Negative |
| O95998 | TMRHNWTPDLSPLWVLLLLCA | Negative |
| O95998 | LLVRATPVSQTTTAATASVR  | Negative |
| O95998 | DLSPLWVLLLLCAHVVTLLVR | Negative |
| O96559 | VVGLLLLSLVLSFMLVQSYE  | Negative |
| O96559 | FMLVQSYELGHASGETNANS  | Negative |
| O96559 | GLLLLSLVLSFMLVQSYELG  | Negative |
| O96559 | SFMLVQSYELGHASGETNAN  | Negative |
| O96559 | NVVGLLLLSLVLSFMLVQSY  | Negative |
| O96559 | VGLLLLSLVLSFMLVQSYEL  | Negative |
| O96559 | RFQPTNVVGLLLLSLVLSFM  | Negative |
| O96559 | RVGNPIRFQPTNVVGLLLLS  | Negative |
| O96559 | LVLSFMLVQSYELGHASGET  | Negative |
| O96559 | GNPIRFQPTNVVGLLLLSLV  | Negative |

|        |                        |          |
|--------|------------------------|----------|
| O96559 | TNVVGLLLLSLVLSFMLVQS   | Negative |
| O96559 | NPIRFQPTNVVGLLLLSLVL   | Negative |
| O96559 | PTNVVGLLLLSLVLSFMLVQ   | Negative |
| O96559 | LLSLVLSFMLVQSYELGHAS   | Negative |
| O96559 | QPTNVVGLLLLSLVLSFMLV   | Negative |
| O96559 | VGNPIRFQPTNVVGLLLLSL   | Negative |
| O96559 | PIRFQPTNVVGLLLLSLVLS   | Negative |
| O96559 | SLVLSFMLVQSYELGHASGE   | Negative |
| O96559 | VLSFMLVQSYELGHASGETN   | Negative |
| O96559 | RSSYRVGNPIRFQPTNVVGL   | Negative |
| O96559 | MRSSYRVGNPIRFQPTNVVG   | Negative |
| O96559 | LSFMLVQSYELGHASGETNA   | Negative |
| O96559 | YRVGNPIRFQPTNVVGLLLL   | Negative |
| O96559 | LLSLVLSFMLVQSYELGHA    | Negative |
| O96559 | FQPTNVVGLLLLSLVLSFML   | Negative |
| O96559 | LSLVLSFMLVQSYELGHASG   | Negative |
| O96559 | SYRVGNPIRFQPTNVVGLLL   | Negative |
| O96559 | SSYRVGNPIRFQPTNVVGLL   | Negative |
| O96559 | IRFQPTNVVGLLLLSLVLSF   | Negative |
| O96910 | NITSQCQMQHKNCEDANGCD   | Negative |
| O96910 | ITSQCQMQHKNCEDANGCDT   | Negative |
| O96910 | VFADQNC DIGNITSQCQM QH | Negative |
| O96910 | LALVAAVFADQNC DIGNITS  | Negative |
| O96910 | ADQNC DIGNITSQCQM QHKN | Negative |
| O96910 | NCDIGNITSQCQM QHKNCED  | Negative |
| O96910 | DIGNITSQCQM QHKNCEDAN  | Negative |
| O96910 | MKVAIILSLALVAAVFADQ    | Negative |
| O96910 | AVFADQNC DIGNITSQCQM Q | Negative |
| O96910 | TSQCQM QHKNCEDANGCDTI  | Negative |
| O96910 | SQCQM QHKNCEDANGCDTII  | Negative |
| O96910 | FADQNC DIGNITSQCQM QHK | Negative |
| O96910 | QCQM QHKNCEDANGCDTIE   | Negative |
| O96910 | IGNITSQCQM QHKNCEDANG  | Negative |
| O96910 | IIILSLALVAAVFADQNC DI  | Negative |
| O96910 | VAIIILSLALVAAVFADQNC   | Negative |
| O96910 | DQNC DIGNITSQCQM QHKNC | Negative |
| O96910 | AAVFADQNC DIGNITSQCQM  | Negative |
| O96910 | IILSLALVAAVFADQNC DIG  | Negative |
| O96910 | VAAVFADQNC DIGNITSQCQ  | Negative |
| O96910 | CDIGNITSQCQM QHKNCEDA  | Negative |
| O96910 | KVAIIILSLALVAAVFADQN   | Negative |
| O96910 | SLALVAAVFADQNC DIGNIT  | Negative |
| O96910 | ILSLALVAAVFADQNC DIGN  | Negative |
| O96910 | QNC DIGNITSQCQM QHKNCE | Negative |
| O96910 | LSLALVAAVFADQNC DIGNI  | Negative |
| O96910 | LVAAVFADQNC DIGNITSQC  | Negative |



|        |                       |          |
|--------|-----------------------|----------|
| O96910 | GNITSQCQMQHKNCEDANGC  | Negative |
| O96910 | ALVAAVFADQNCIDGNITSQ  | Negative |
| O97763 | ASALAEPVHFRDCGSGVGV   | Negative |
| O97763 | TLSASALAEPVHFRDCGSGV  | Negative |
| O97763 | DCGSGVGVIVKEVNVNPCPTQ | Negative |
| O97763 | LTLASALAEPVHFRDCGSG   | Negative |
| O97763 | AAFLLLTLASALAEPVHFR   | Negative |
| O97763 | SGVGVIVKEVNVNPCPTQPCQ | Negative |
| O97763 | ALAEPVHFRDCGSGVGVIVKE | Negative |
| O97763 | SASALAEPVHFRDCGSGVGV  | Negative |
| O97763 | CGSGVGVIVKEVNVNPCPTQP | Negative |
| O97763 | MHFLAAAFLLLTLSASALAE  | Negative |
| O97763 | VHFRDCGSGVGVIVKEVNVNP | Negative |
| O97763 | SALAEPVHFRDCGSGVGVIVK | Negative |
| O97763 | FLAAAFLLLTLSASALAEPV  | Negative |
| O97763 | FRDCGSGVGVIVKEVNVNPCP | Negative |
| O97763 | AEPVHFRDCGSGVGVIVKEVN | Negative |
| O97763 | GSGVGVIVKEVNVNPCPTQPC | Negative |
| O97763 | GVGVIVKEVNVNPCPTQPCQL | Negative |
| O97763 | HFLAAAFLLLTLSASALAE   | Negative |
| O97763 | LLLTLSASALAEPVHFRDCG  | Negative |
| O97763 | PVHFRDCGSGVGVIVKEVNVN | Negative |
| O97763 | LSASALAEPVHFRDCGSGVG  | Negative |
| O97763 | AFLLTLSASALAEPVHFRD   | Negative |
| O97763 | RDCGSGVGVIVKEVNVNPCPT | Negative |
| O97763 | LAEPVHFRDCGSGVGVIVKEV | Negative |
| O97763 | HFRDCGSGVGVIVKEVNVNPC | Negative |
| O97763 | LAAAFLLLTLSASALAEPVH  | Negative |
| O97763 | FLLLTLSASALAEPVHFRDC  | Negative |
| O97763 | EPVHFRDCGSGVGVIVKEVNV | Negative |
| O97763 | LLTLASALAEPVHFRDCGS   | Negative |
| O97939 | LDNLVPSGKMKILLVFLGLL  | Negative |
| O97939 | RHGASSPKLDNLVPSGKMKI  | Negative |
| O97939 | ASSPKLDNLVPSGKMKILLV  | Negative |
| O97939 | VPSGKMKILLVFLGLLCYSA  | Negative |
| O97939 | MKILLVFLGLLCYSAAMPMQ  | Negative |
| O97939 | LSCRHGASSPKLDNLVPSGK  | Negative |
| O97939 | CRHGASSPKLDNLVPSGKMK  | Negative |
| O97939 | FLGLLCYSAAMPMQMPRMPG  | Negative |
| O97939 | ILLVFLGLLCYSAAMPMQMP  | Negative |
| O97939 | HGASSPKLDNLVPSGKMKIL  | Negative |
| O97939 | VFLGLLCYSAAMPMQMPRMP  | Negative |
| O97939 | MLLSRHHGASSPKLDNLVPS  | Negative |
| O97939 | PKLDNLVPSGKMKILLVFLG  | Negative |
| O97939 | SPKLDNLVPSGKMKILLVFL  | Negative |
| O97939 | SCRHGASSPKLDNLVPSGKM  | Negative |

|        |                      |          |
|--------|----------------------|----------|
| O97939 | LLVFLGLLCYSAAMPQMMPR | Negative |
| O97939 | GASSPKLDNLVPSGKMKILL | Negative |
| O97939 | KMKILLVFLGLLCYSAAMP  | Negative |
| O97939 | LVFLGLLCYSAAMPQMMPRM | Negative |
| O97939 | DNLVPSGKMKILLVFLGLLC | Negative |
| O97939 | LLSCRHGASSPKLDNLVPSG | Negative |
| O97939 | LGLLCYSAAMPQMMPRMPGF | Negative |
| O97939 | SGKMKILLVFLGLLCYSAAM | Negative |
| O97939 | GKMKILLVFLGLLCYSAAMP | Negative |
| O97939 | NLVPSGKMKILLVFLGLLCY | Negative |
| O97939 | PSGKMKILLVFLGLLCYSA  | Negative |
| O97939 | LVPSGKMKILLVFLGLLCYS | Negative |
| O97939 | SSPKLDNLVPSGKMKILLVF | Negative |
| O97939 | KLDNLVPSGKMKILLVFLGL | Negative |
| P00082 | GAALVWSASAYAAGDPVKGE | Negative |
| P00082 | AAGDPVKGEQVFKQCKICHQ | Negative |
| P00082 | MVGAALVWSASAYAAGDPVK | Negative |
| P00082 | IAMVGAALVWSASAYAAGDP | Negative |
| P00082 | GDPVKGEQVFKQCKICHQVG | Negative |
| P00082 | VKGEQVFKQCKICHQVGPTA | Negative |
| P00082 | ASAYAAGDPVKGEQVFKQCK | Negative |
| P00082 | PVKGEQVFKQCKICHQVGPT | Negative |
| P00082 | QVFKQCKICHQVGPTAKPGV | Negative |
| P00082 | YAAGDPVKGEQVFKQCKICH | Negative |
| P00082 | GEQVFKQCKICHQVGPTAKP | Negative |
| P00082 | IKIAMVGAALVWSASAYAAG | Negative |
| P00082 | WSASAYAAGDPVKGEQVFKQ | Negative |
| P00082 | AALVWSASAYAAGDPVKGEQ | Negative |
| P00082 | LVWSASAYAAGDPVKGEQVF | Negative |
| P00082 | VWSASAYAAGDPVKGEQVFK | Negative |
| P00082 | ALVWSASAYAAGDPVKGEQV | Negative |
| P00082 | KIAMVGAALVWSASAYAAGD | Negative |
| P00082 | MKAIKIAMVGAALVWSASAY | Negative |
| P00082 | DPVKGEQVFKQCKICHQVGP | Negative |
| P00082 | AYAAGDPVKGEQVFKQCKIC | Negative |
| P00082 | VGAALVWSASAYAAGDPVKG | Negative |
| P00082 | EQVFKQCKICHQVGPTAKPG | Negative |
| P00082 | SASAYAAGDPVKGEQVFKQC | Negative |
| P00082 | KGEQVFKQCKICHQVGPTAK | Negative |
| P00082 | AGDPVKGEQVFKQCKICHQV | Negative |
| P00082 | KAIKIAMVGAALVWSASAYA | Negative |
| P00082 | SAYAAGDPVKGEQVFKQCKI | Negative |
| P00082 | AIKIAMVGAALVWSASAYAA | Negative |
| P00083 | ASGEQVFKQCLVCHSIGPGA | Negative |
| P00083 | AQDAASGEQVFKQCLVCHSI | Negative |
| P00083 | RKLVFGLFVLAASVAPAAAQ | Negative |

|        |                      |          |
|--------|----------------------|----------|
| P00083 | MRKLVFGLFVLAASVAPAAA | Negative |
| P00083 | GLFVLAASVAPAAAQDAASG | Negative |
| P00083 | AASGEQVFKQCLVCHSIGPG | Negative |
| P00083 | KLVFGLFVLAASVAPAAAQD | Negative |
| P00083 | GEQVFKQCLVCHSIGPGAKN | Negative |
| P00083 | PAAAQDAASGEQVFKQCLVC | Negative |
| P00083 | SGEQVFKQCLVCHSIGPGAK | Negative |
| P00083 | DAASGEQVFKQCLVCHSIGP | Negative |
| P00083 | QDAASGEQVFKQCLVCHSIG | Negative |
| P00083 | VAPAAAQDAASGEQVFKQCL | Negative |
| P00083 | APAAAQDAASGEQVFKQCLV | Negative |
| P00083 | AAAQDAASGEQVFKQCLVCH | Negative |
| P00083 | AASVAPAAAQDAASGEQVFK | Negative |
| P00083 | ASVAPAAAQDAASGEQVFKQ | Negative |
| P00083 | FKQCLVCHSIGPGAKNKVGP | Negative |
| P00083 | LVFGLFVLAASVAPAAAQDA | Negative |
| P00083 | SVAPAAAQDAASGEQVFKQC | Negative |
| P00083 | VFGLFVLAASVAPAAAQDAA | Negative |
| P00083 | QVFKQCLVCHSIGPGAKNKV | Negative |
| P00083 | LAASVAPAAAQDAASGEQVF | Negative |
| P00083 | VFKQCLVCHSIGPGAKNKVG | Negative |
| P00083 | AAQDAASGEQVFKQCLVCHS | Negative |
| P00083 | EQVFKQCLVCHSIGPGAKNK | Negative |
| P00083 | VLAASVAPAAAQDAASGEQV | Negative |
| P00083 | FVLAASVAPAAAQDAASGEQ | Negative |
| P00083 | LFVLAASVAPAAAQDAASGE | Negative |
| P00091 | SIGTASAQDAKAGEAVFKQC | Negative |
| P00091 | LSIAATAGSLSIGTASAQDA | Negative |
| P00091 | LSIGTASAQDAKAGEAVFKQ | Negative |
| P00091 | LSIGTASAQDAKAGEAVFK  | Negative |
| P00091 | ATAGSLSIGTASAQDAKAGE | Negative |
| P00091 | SAQDAKAGEAVFKQCMTCHR | Negative |
| P00091 | GSLSIGTASAQDAKAGEAVF | Negative |
| P00091 | SIAATAGSLSIGTASAQDAK | Negative |
| P00091 | KLLTILSIAATAGSLSIGTA | Negative |
| P00091 | ASAQDAKAGEAVFKQCMTCH | Negative |
| P00091 | QDAKAGEAVFKQCMTCHRAD | Negative |
| P00091 | GTASAQDAKAGEAVFKQCMT | Negative |
| P00091 | TAGSLSIGTASAQDAKAGEA | Negative |
| P00091 | LLTILSIAATAGSLSIGTAS | Negative |
| P00091 | AATAGSLSIGTASAQDAKAG | Negative |
| P00091 | AKAGEAVFKQCMTCHRADKN | Negative |
| P00091 | IGTASAQDAKAGEAVFKQCM | Negative |
| P00091 | AGSLSIGTASAQDAKAGEAV | Negative |
| P00091 | DAKAGEAVFKQCMTCHRADK | Negative |
| P00091 | VKKLLTILSIAATAGSLSIG | Negative |

|        |                      |          |
|--------|----------------------|----------|
| P00091 | LTILSIAATAGSLSIGTASA | Negative |
| P00091 | MVKKLLTILSIAATAGSLSI | Negative |
| P00091 | TASAQDAKAGEAVFKQCMT  | Negative |
| P00091 | AGEAVFKQCMTCHRADKNMV | Negative |
| P00091 | KAGEAVFKQCMTCHRADKNM | Negative |
| P00091 | TILSIAATAGSLSIGTASAQ | Negative |
| P00091 | ILSIAATAGSLSIGTASAQD | Negative |
| P00091 | KKLLTILSIAATAGSLSIGT | Negative |
| P00091 | AQDAKAGEAVFKQCMTCHRA | Negative |
| P00094 | EFNKCKTCHSIIAPDGTEIV | Negative |
| P00094 | LVLAAPAFAGDAAKGEKEFN | Negative |
| P00094 | DAAKGEKEFNKCKTCHSIIA | Negative |
| P00094 | ISLTAATVAALVLAAPAFAG | Negative |
| P00094 | KISLTAATVAALVLAAPAF  | Negative |
| P00094 | FAGDAAKGEKEFNKCKTCHS | Negative |
| P00094 | SLTAATVAALVLAAPAFAGD | Negative |
| P00094 | EKEFNKCKTCHSIIAPDGTE | Negative |
| P00094 | TAATVAALVLAAPAFAGDAA | Negative |
| P00094 | LAAPAFAGDAAKGEKEFNKC | Negative |
| P00094 | KEFNKCKTCHSIIAPDGTEI | Negative |
| P00094 | AGDAAKGEKEFNKCKTCHSI | Negative |
| P00094 | VLAAPAFAGDAAKGEKEFNK | Negative |
| P00094 | AALVLAAPAFAGDAAKGEKE | Negative |
| P00094 | KGEKEFNKCKTCHSIIAPDG | Negative |
| P00094 | GDAAKGEKEFNKCKTCHSII | Negative |
| P00094 | ALVLAAPAFAGDAAKGEKEF | Negative |
| P00094 | AFAGDAAKGEKEFNKCKTCH | Negative |
| P00094 | TVAALVLAAPAFAGDAAKGE | Negative |
| P00094 | VAALVLAAPAFAGDAAKGEK | Negative |
| P00094 | GEKEFNKCKTCHSIIAPDGT | Negative |
| P00094 | LTAATVAALVLAAPAFAGDA | Negative |
| P00094 | MKISLTAATVAALVLAAPAF | Negative |
| P00094 | ATVAALVLAAPAFAGDAAKG | Negative |
| P00094 | AAPAFAGDAAKGEKEFNKCK | Negative |
| P00094 | APAFAGDAAKGEKEFNKCKT | Negative |
| P00094 | PAFAGDAAKGEKEFNKCKTC | Negative |
| P00094 | AKGEKEFNKCKTCHSIIAPD | Negative |
| P00094 | AAKGEKEFNKCKTCHSIIAP | Negative |
| P00096 | KEFNKCKACHMIQAPDGTDI | Negative |
| P00096 | PAAAQDGDAAKGEKEFNKCK | Negative |
| P00096 | ITLALPAAAQDGDAAKGEKE | Negative |
| P00096 | AAKGEKEFNKCKACHMIQAP | Negative |
| P00096 | ISIIATLAAITLALPAAAQD | Negative |
| P00096 | AAITLALPAAAQDGDAAKGE | Negative |
| P00096 | LAAITLALPAAAQDGDAAKG | Negative |
| P00096 | SIYATLAAITLALPAAAQDG | Negative |

|        |                      |          |
|--------|----------------------|----------|
| P00096 | ALPAAAQDGDAAKGEKEFNK | Negative |
| P00096 | MKISİYATLAAITLALPAAA | Negative |
| P00096 | KISİYATLAAITLALPAAQ  | Negative |
| P00096 | TLALPAAAQDGDAAKGEKEF | Negative |
| P00096 | GEKEFNKCKACHMIQAPDGT | Negative |
| P00096 | DAAKGEKEFNKCKACHMIQA | Negative |
| P00096 | ATLAAITLALPAAAQDGDA  | Negative |
| P00096 | EKEFNKCKACHMIQAPDGT  | Negative |
| P00096 | IYATLAAITLALPAAAQDGD | Negative |
| P00096 | AAAQDGDAAKGEKEFNKCKA | Negative |
| P00096 | GDAAKGEKEFNKCKACHMIQ | Negative |
| P00096 | LALPAAAQDGDAAKGEKEFN | Negative |
| P00096 | AITLALPAAAQDGDAAKGEK | Negative |
| P00096 | AQDGDAAKGEKEFNKCKACH | Negative |
| P00096 | DGDAAKGEKEFNKCKACHMI | Negative |
| P00096 | QDGDAAKGEKEFNKCKACHM | Negative |
| P00096 | AAQDGDAAKGEKEFNKCKAC | Negative |
| P00096 | KGEKEFNKCKACHMIQAPDG | Negative |
| P00096 | LPAAAQDGDAAKGEKEFNKC | Negative |
| P00096 | AKGEKEFNKCKACHMIQAPD | Negative |
| P00096 | TLAAITLALPAAAQDGDAAK | Negative |
| P00099 | PEVLFKNKGCVACHAIDTKM | Negative |
| P00099 | LAQGAWAEDPEVLFKNKGCV | Negative |
| P00099 | EVLFKNKGCVACHAIDTKMV | Negative |
| P00099 | AQGAWAEDPEVLFKNKGCVA | Negative |
| P00099 | AEDPEVLFKNKGCVACHAID | Negative |
| P00099 | DPEVLFKNKGCVACHAIDTK | Negative |
| P00099 | YALLSLLATGTLLAQGAWAE | Negative |
| P00099 | TLLAQGAWAEDPEVLFKNKG | Negative |
| P00099 | ALLSLLATGTLLAQGAWAED | Negative |
| P00099 | PYALLSLLATGTLLAQGAWA | Negative |
| P00099 | EDPEVLFKNKGCVACHAIDT | Negative |
| P00099 | MKPYALLSLLATGTLLAQGA | Negative |
| P00099 | GTLLAQGAWAEDPEVLFKNK | Negative |
| P00099 | LATGTLLAQGAWAEDPEVLF | Negative |
| P00099 | VLFKNKGCVACHAIDTKMVG | Negative |
| P00099 | TGTLLAQGAWAEDPEVLFKN | Negative |
| P00099 | ATGTLLAQGAWAEDPEVLFK | Negative |
| P00099 | KPYALLSLLATGTLLAQGAW | Negative |
| P00099 | WAEDPEVLFKNKGCVACHAI | Negative |
| P00099 | LLAQGAWAEDPEVLFKNKGC | Negative |
| P00099 | KNKGCVACHAIDTKMVGPAY | Negative |
| P00099 | LLATGTLLAQGAWAEDPEVL | Negative |
| P00099 | LSLLATGTLLAQGAWAEDPE | Negative |
| P00099 | FKNKGCVACHAIDTKMVGPA | Negative |
| P00099 | LLSLLATGTLLAQGAWAEDP | Negative |

|        |                      |          |
|--------|----------------------|----------|
| P00099 | QGAWAEDPEVLFKNKGCVAC | Negative |
| P00099 | GAWAEDPEVLFKNKGCVACH | Negative |
| P00099 | LFKNKGCVACHAIDTKMVG  | Negative |
| P00099 | AWAEDPEVLFKNKGCVACHA | Negative |
| P00101 | QPALAQDGEALFKSKPCAAC | Negative |
| P00101 | PMLALGGALAMQPALAQDGE | Negative |
| P00101 | MQPALAQDGEALFKSKPCAA | Negative |
| P00101 | ILIPMLALGGALAMQPALAQ | Negative |
| P00101 | QDGEALFKSKPCAACHSVDT | Negative |
| P00101 | LAQDGEALFKSKPCAACHSV | Negative |
| P00101 | IPMLALGGALAMQPALAQDG | Negative |
| P00101 | LFKSKPCAACHSVDTKMVG  | Negative |
| P00101 | ALFKSKPCAACHSVDTKMVG | Negative |
| P00101 | PALAQDGEALFKSKPCAACH | Negative |
| P00101 | AQDGEALFKSKPCAACHSVD | Negative |
| P00101 | GEALFKSKPCAACHSVDTKM | Negative |
| P00101 | MKKILIPMLALGGALAMQPA | Negative |
| P00101 | AMQPALAQDGEALFKSKPCA | Negative |
| P00101 | ALAQDGEALFKSKPCAACHS | Negative |
| P00101 | DGEALFKSKPCAACHSVDTK | Negative |
| P00101 | LALGGALAMQPALAQDGEAL | Negative |
| P00101 | GGALAMQPALAQDGEALFKS | Negative |
| P00101 | GALAMQPALAQDGEALFKSK | Negative |
| P00101 | ALGGALAMQPALAQDGEALF | Negative |
| P00101 | KSKPCAACHSVDTKMVGPA  | Negative |
| P00101 | ALAMQPALAQDGEALFKSKP | Negative |
| P00101 | KILIPMLALGGALAMQPALA | Negative |
| P00101 | LIPMLALGGALAMQPALAQD | Negative |
| P00101 | KKILIPMLALGGALAMQPAL | Negative |
| P00101 | LAMQPALAQDGEALFKSKPC | Negative |
| P00101 | LGGALAMQPALAQDGEALFK | Negative |
| P00101 | FKSKPCAACHSVDTKMVGPA | Negative |
| P00101 | EALFKSKPCAACHSVDTKMV | Negative |
| P00106 | AAAGQAKAAVCGACHGADGN | Negative |
| P00106 | AAGQAKAAVCGACHGADGNS | Negative |
| P00106 | KAAVCGACHGADGNPAPNF  | Negative |
| P00106 | HAAGDAAAGQAKAAVCGACH | Negative |
| P00106 | DAAAGQAKAAVCGACHGADG | Negative |
| P00106 | SLLTLGLTGLAHAAGDAAA  | Negative |
| P00106 | NKLLVSLLLTLGLTGLAHAA | Negative |
| P00106 | AHAAGDAAAGQAKAAVCGAC | Negative |
| P00106 | AGDAAAGQAKAAVCGACHGA | Negative |
| P00106 | LTLGLTGLAHAAGDAAAGQA | Negative |
| P00106 | LVSLLTLGLTGLAHAAGDA  | Negative |
| P00106 | LGLTGLAHAAGDAAAGQAKA | Negative |
| P00106 | LTGLAHAAGDAAAGQAKAAV | Negative |

|        |                       |          |
|--------|-----------------------|----------|
| P00106 | LLTLGLTGLAHAAGDAAAGQ  | Negative |
| P00106 | GLAHAAGDAAAGQAKAAVCG  | Negative |
| P00106 | MNKLLVSLLLTLGLTGLAHA  | Negative |
| P00106 | GLTGLAHAAGDAAAGQAKAA  | Negative |
| P00106 | LLVSLLLTLGLTGLAHAAGD  | Negative |
| P00106 | LLLTLGLTGLAHAAGDAAAG  | Negative |
| P00106 | GQAKAAVCGACHGADGNSPA  | Negative |
| P00106 | TLGLTGLAHAAGDAAAGQAK  | Negative |
| P00106 | KLLVSLLLTLGLTGLAHAAG  | Negative |
| P00106 | AGQAKAAVCGACHGADGNSP  | Negative |
| P00106 | QAKAAVCGACHGADGNSPAP  | Negative |
| P00106 | AKAAVCGACHGADGNSPAPN  | Negative |
| P00106 | LAHAAGDAAAGQAKAAVCGA  | Negative |
| P00106 | AAGDAAAGQAKAAVCGACHG  | Negative |
| P00106 | TGLAHAAGDAAAGQAKAAVC  | Negative |
| P00106 | GDAAAGQAKAAVCGACHGAD  | Negative |
| P00120 | AALAFGVSAAMAADGAALYK  | Negative |
| P00120 | KRILVVMISICAALAFGVSA  | Negative |
| P00120 | ADGAALYKSCVGCHGADGSK  | Negative |
| P00120 | RILVVMISICAALAFGVSAAM | Negative |
| P00120 | ICAALAFGVSAAMAADGAAL  | Negative |
| P00120 | GAALYKSCVGCHGADGSKQA  | Negative |
| P00120 | LYKSCVGCHGADGSKQAMGV  | Negative |
| P00120 | AAMAADGAALYKSCVGCHGA  | Negative |
| P00120 | MKRILVVMISICAALAFGVSA | Negative |
| P00120 | SAAMAADGAALYKSCVGCHG  | Negative |
| P00120 | VMSICAALAFGVSAAMAADG  | Negative |
| P00120 | LVVMISICAALAFGVSAAMAA | Negative |
| P00120 | VSAAMAADGAALYKSCVGCH  | Negative |
| P00120 | ALAFGVSAAMAADGAALYKS  | Negative |
| P00120 | YKSCVGCHGADGSKQAMGVG  | Negative |
| P00120 | MAADGAALYKSCVGCHGADG  | Negative |
| P00120 | MSICAALAFGVSAAMAADGA  | Negative |
| P00120 | AMAADGAALYKSCVGCHGAD  | Negative |
| P00120 | FGVSAAMAADGAALYKSCVG  | Negative |
| P00120 | ALYKSCVGCHGADGSKQAMG  | Negative |
| P00120 | AFGVSAAMAADGAALYKSCV  | Negative |
| P00120 | CAALAFGVSAAMAADGAALY  | Negative |
| P00120 | VVMSICAALAFGVSAAMAAD  | Negative |
| P00120 | ILVVMISICAALAFGVSAAMA | Negative |
| P00120 | DGAALYKSCVGCHGADGSKQ  | Negative |
| P00120 | AALYKSCVGCHGADGSKQAM  | Negative |
| P00120 | GVSAAMAADGAALYKSCVGC  | Negative |
| P00120 | LAFGVSAAMAADGAALYKSC  | Negative |
| P00120 | AADGAALYKSCVGCHGADGS  | Negative |
| P00131 | DGLKMEATKQPVVFNHSTHK  | Negative |

|        |                       |          |
|--------|-----------------------|----------|
| P00131 | LFFCGVLALAVAFALPVVAA  | Negative |
| P00131 | CGVLALAVAFALPVVAAPKA  | Negative |
| P00131 | ALPVVAAPKAPADGLKMEAT  | Negative |
| P00131 | AAPKAPADGLKMEATKQPVV  | Negative |
| P00131 | PADGLKMEATKQPVVFNHST  | Negative |
| P00131 | PKAPADGLKMEATKQPVVFN  | Negative |
| P00131 | MRKLFFCGVLALAVAFALPV  | Negative |
| P00131 | LALAVAFALPVVAAPKAPAD  | Negative |
| P00131 | FCGVLALAVAFALPVVAAPK  | Negative |
| P00131 | GLKMEATKQPVVFNHSTHKS  | Negative |
| P00131 | ALAVAFALPVVAAPKAPADG  | Negative |
| P00131 | KLFFCGVLALAVAFALPVVA  | Negative |
| P00131 | FALPVVAAPKAPADGLKMEA  | Negative |
| P00131 | VVAAPKAPADGLKMEATKQP  | Negative |
| P00131 | FFCGVLALAVAFALPVVAAP  | Negative |
| P00131 | ADGLKMEATKQPVVFNHSTH  | Negative |
| P00131 | AVAFALPVVAAPKAPADGLK  | Negative |
| P00131 | APADGLKMEATKQPVVFNHS  | Negative |
| P00131 | RKLFFCGVLALAVAFALPVV  | Negative |
| P00131 | VAFALPVVAAPKAPADGLKM  | Negative |
| P00131 | PVVAAPKAPADGLKMEATKQ  | Negative |
| P00131 | VLALAVAFALPVVAAPKAPA  | Negative |
| P00131 | VAAPKAPADGLKMEATKQPV  | Negative |
| P00131 | KAPADGLKMEATKQPVVFNH  | Negative |
| P00131 | APKAPADGLKMEATKQPVVF  | Negative |
| P00131 | AFALPVVAAPKAPADGLKME  | Negative |
| P00131 | LPVVAAPKAPADGLKMEATK  | Negative |
| P00131 | LAVAFALPVVAAPKAPADGL  | Negative |
| P00132 | AVAIAMPALAAAPKAPADGL  | Negative |
| P00132 | APKAPADGLKMDKTKQPVVF  | Negative |
| P00132 | MKKMFLTGV LALAVAIAMPA | Negative |
| P00132 | MPALAAAPKAPADGLKMDKT  | Negative |
| P00132 | LTGVLALAVAIAMPALAAAP  | Negative |
| P00132 | LALAVAIAMPALAAAPKAPA  | Negative |
| P00132 | PADGLKMDKTKQPVVFNHST  | Negative |
| P00132 | AMPALAAAPKAPADGLKMDK  | Negative |
| P00132 | VAIAMPALAAAPKAPADGLK  | Negative |
| P00132 | ALAAAPKAPADGLKMDKTKQ  | Negative |
| P00132 | MFLTGV LALAVAIAMPALAA | Negative |
| P00132 | KAPADGLKMDKTKQPVVFNH  | Negative |
| P00132 | LAAAPKAPADGLKMDKTKQP  | Negative |
| P00132 | ALAVAIAMPALAAAPKAPAD  | Negative |
| P00132 | AIAMPALAAAPKAPADGLKM  | Negative |
| P00132 | IAMPALAAAPKAPADGLKMD  | Negative |
| P00132 | LAVAIAMPALAAAPKAPADG  | Negative |
| P00132 | AAPKAPADGLKMDKTKQPVV  | Negative |



|        |                        |          |
|--------|------------------------|----------|
| P00132 | PALAAAPKAPADGLKMDKTK   | Negative |
| P00132 | PKAPADGLKMDKTKQPVVFN   | Negative |
| P00132 | AAAPKAPADGLKMDKTKQPV   | Negative |
| P00132 | TGVLALAVAIAMPALAAAPK   | Negative |
| P00132 | GVLALAVAIAMPALAAAPKA   | Negative |
| P00132 | APADGLKMDKTKQPVVFNHS   | Negative |
| P00132 | FLTGVLALAVAIAMPALAAA   | Negative |
| P00132 | ADGLKMDKTKQPVVFNHSTH   | Negative |
| P00132 | KMFLTGVLALAVAIAMPALA   | Negative |
| P00132 | KKMFLTGVLALAVAIAMPAL   | Negative |
| P00132 | DGLKMDKTKQPVVFNHSTHK   | Negative |
| P00144 | ALAALTTTTVAQAADPAAYV   | Negative |
| P00144 | AADPAAYVEYRKSIVLSATSN  | Negative |
| P00144 | MIVAALAALTTTTVAQAADP   | Negative |
| P00144 | EYRKSIVLSATSNYMKAIKIT  | Negative |
| P00144 | TTVAQAADPAAYVEYRKSIVL  | Negative |
| P00144 | TTTTVAQAADPAAYVEYRKS   | Negative |
| P00144 | AALAALTTTTVAQAADPAAY   | Negative |
| P00144 | AAYVEYRKSIVLSATSNYMKAI | Negative |
| P00144 | LAALTTTTVAQAADPAAYVE   | Negative |
| P00144 | VEYRKSIVLSATSNYMKAIKI  | Negative |
| P00144 | MKRMMIVAALAALTTTTVAQA  | Negative |
| P00144 | AALTTTTVAQAADPAAYVEY   | Negative |
| P00144 | ALTTTTVAQAADPAAYVEYR   | Negative |
| P00144 | KRMMIVAALAALTTTTVAQA   | Negative |
| P00144 | YVEYRKSIVLSATSNYMKAI   | Negative |
| P00144 | ADPAAYVEYRKSIVLSATSNY  | Negative |
| P00144 | AQAADPAAYVEYRKSIVLSAT  | Negative |
| P00144 | RMMIVAALAALTTTTVAQAA   | Negative |
| P00144 | VAQAADPAAYVEYRKSIVLSA  | Negative |
| P00144 | QAADPAAYVEYRKSIVLSATS  | Negative |
| P00144 | LTTTTVAQAADPAAYVEYRK   | Negative |
| P00144 | IVAALAALTTTTVAQAADPA   | Negative |
| P00144 | AYVEYRKSIVLSATSNYMKAI  | Negative |
| P00144 | YRKSIVLSATSNYMKAIKITL  | Negative |
| P00144 | PAAYVEYRKSIVLSATSNYMK  | Negative |
| P00144 | TTVAQAADPAAYVEYRKSIV   | Negative |
| P00144 | DPAAYVEYRKSIVLSATSNY   | Negative |
| P00144 | TVAQAADPAAYVEYRKSIVLS  | Negative |
| P00144 | MMIVAALAALTTTTVAQAAD   | Negative |
| P00148 | MRRVLLATLMAALPAAAMAA   | Negative |
| P00148 | TLMAALPAAAMAADAHVVE    | Negative |
| P00148 | RKGYFSLVALEFGPLAAMAK   | Negative |
| P00148 | PAAAMAADAHVVEARKGYF    | Negative |
| P00148 | EHVVEARKGYFSLVALEFGP   | Negative |
| P00148 | LMAALPAAAMAADAHVVEA    | Negative |

|        |                       |          |
|--------|-----------------------|----------|
| P00148 | AAMAADAEHVVEARKGYFSL  | Negative |
| P00148 | AMAADAEHVVEARKGYFSLV  | Negative |
| P00148 | ARKGYFSLVALEFGPLAAMA  | Negative |
| P00148 | ATLMAALPAAAMAADAEHV   | Negative |
| P00148 | ADAEHVVEARKGYFSLVALE  | Negative |
| P00148 | VLLATLMAALPAAAMAADAE  | Negative |
| P00148 | RRVLLATLMAALPAAAMAAD  | Negative |
| P00148 | MAADAEHVVEARKGYFSLVA  | Negative |
| P00148 | HVVEARKGYFSLVALEFGPL  | Negative |
| P00148 | DAEHVVEARKGYFSLVALEF  | Negative |
| P00148 | VEARKGYFSLVALEFGPLAA  | Negative |
| P00148 | LPAAAMAADAEHVVEARKGY  | Negative |
| P00148 | KGYSFSLVALEFGPLAAMAKG | Negative |
| P00148 | EARKGYFSLVALEFGPLAAM  | Negative |
| P00148 | LATLMAALPAAAMAADAEHV  | Negative |
| P00148 | ALPAAAMAADAEHVVEARKG  | Negative |
| P00148 | RVLLATLMAALPAAAMAADA  | Negative |
| P00148 | AADAEHVVEARKGYFSLVAL  | Negative |
| P00148 | AAAMAADAEHVVEARKGYFS  | Negative |
| P00148 | VVEARKGYFSLVALEFGPLA  | Negative |
| P00148 | AALPAAAMAADAEHVVEARK  | Negative |
| P00148 | AEHVVEARKGYFSLVALEFG  | Negative |
| P00148 | MAALPAAAMAADAEHVVEAR  | Negative |
| P00149 | QRKAILKQMGEATKPIAAML  | Negative |
| P00149 | GFAVAQTDVIAQRKAILKQM  | Negative |
| P00149 | IAGLVVLGSGFAVAQTDVIA  | Negative |
| P00149 | AGLVVLGSGFAVAQTDVIAQ  | Negative |
| P00149 | KAILKQMGEATKPIAAMLKG  | Negative |
| P00149 | FAVAQTDVIAQRKAILKQMG  | Negative |
| P00149 | SGFAVAQTDVIAQRKAILKQ  | Negative |
| P00149 | VIAQRKAILKQMGEATKPIA  | Negative |
| P00149 | RKAILKQMGEATKPIAAMLK  | Negative |
| P00149 | AQRKAILKQMGEATKPIAAM  | Negative |
| P00149 | DVIAQRKAILKQMGEATKPI  | Negative |
| P00149 | IATIAGLVVLGSGFAVAQTD  | Negative |
| P00149 | LVVLGSGFAVAQTDVIAQRK  | Negative |
| P00149 | VLGSGFAVAQTDVIAQRKAI  | Negative |
| P00149 | RIATIAGLVVLGSGFAVAQT  | Negative |
| P00149 | LGSGFAVAQTDVIAQRKAIL  | Negative |
| P00149 | GSGFAVAQTDVIAQRKAILK  | Negative |
| P00149 | AQTDVIAQRKAILKQMGEAT  | Negative |
| P00149 | GLVVLGSGFAVAQTDVIAQR  | Negative |
| P00149 | AVAQTDVIAQRKAILKQMGE  | Negative |
| P00149 | KLRIATIAGLVVLGSGFAVA  | Negative |
| P00149 | VVLGSGFAVAQTDVIAQRKA  | Negative |
| P00149 | ATIAGLVVLGSGFAVAQTDV  | Negative |

|        |                       |          |
|--------|-----------------------|----------|
| P00149 | LRIATIAGLVVLGSGFAVAQ  | Negative |
| P00149 | TDVIAQRKAILKQMGEATKP  | Negative |
| P00149 | MKLRIATIAGLVVLGSGFAV  | Negative |
| P00149 | VAQTDVIAQRKAILKQMGEA  | Negative |
| P00149 | IAQRKAILKQMGEATKPIAA  | Negative |
| P00149 | QTDVIAQRKAILKQMGEATK  | Negative |
| P00150 | ALVLTASAVMAQQDLVDKTQ  | Negative |
| P00150 | TQKLMKDNGRNMMLVLGAIK  | Negative |
| P00150 | DKTQKLMKDNGRNMMLVLGAI | Negative |
| P00150 | LVDKTQKLMKDNGRNMMLVLG | Negative |
| P00150 | VAGALVLTASAVMAQQDLVD  | Negative |
| P00150 | GALVLTASAVMAQQDLVDKT  | Negative |
| P00150 | MAQQDLVDKTQKLMKDNGRN  | Negative |
| P00150 | QKLMKDNGRNMMLVLGAIK   | Negative |
| P00150 | VLTASAVMAQQDLVDKTQKL  | Negative |
| P00150 | ASAVMAQQDLVDKTQKLMKD  | Negative |
| P00150 | AVMAQQDLVDKTQKLMKDNG  | Negative |
| P00150 | RTVIVAGALVLTASAVMAQQ  | Negative |
| P00150 | VDKTQKLMKDNGRNMMLVLGA | Negative |
| P00150 | LRTVIVAGALVLTASAVMAQ  | Negative |
| P00150 | QDLVDKTQKLMKDNGRNMMLV | Negative |
| P00150 | VMAQQDLVDKTQKLMKDNGR  | Negative |
| P00150 | AQQDLVDKTQKLMKDNGRNM  | Negative |
| P00150 | LVLTASAVMAQQDLVDKTQK  | Negative |
| P00150 | TASAVMAQQDLVDKTQKLMK  | Negative |
| P00150 | KLMKDNGRNMMLVLGAIKGE  | Negative |
| P00150 | KTQKLMKDNGRNMMLVLGAIA | Negative |
| P00150 | TVIVAGALVLTASAVMAQQD  | Negative |
| P00150 | SAVMAQQDLVDKTQKLMKDN  | Negative |
| P00150 | QQDLVDKTQKLMKDNGRNM   | Negative |
| P00150 | VIVAGALVLTASAVMAQQDL  | Negative |
| P00150 | AGALVLTASAVMAQQDLVDK  | Negative |
| P00150 | MLRTVIVAGALVLTASAVMA  | Negative |
| P00150 | LTASAVMAQQDLVDKTQKLM  | Negative |
| P00150 | DLVDKTQKLMKDNGRNMMLVL | Negative |
| P00154 | ALGLASSAIAAGLSPEEQIE  | Negative |
| P00154 | SPEEQIETRQAGYEFMGWNM  | Negative |
| P00154 | GLMALGLASSAIAAGLSPEE  | Negative |
| P00154 | EEQIETRQAGYEFMGWNMGK  | Negative |
| P00154 | PEEQIETRQAGYEFMGWNMG  | Negative |
| P00154 | MALGLASSAIAAGLSPEEQI  | Negative |
| P00154 | EQIETRQAGYEFMGWNMGKI  | Negative |
| P00154 | LASSAIAAGLSPEEQIETRQ  | Negative |
| P00154 | SSAIAAGLSPEEQIETRQAG  | Negative |
| P00154 | ASTAAGLMALGLASSAIAAG  | Negative |
| P00154 | KHVLASTAAGLMALGLASSA  | Negative |

|        |                      |          |
|--------|----------------------|----------|
| P00154 | STAAGLMALGLASSAIAAGL | Negative |
| P00154 | IAAGLSPEEQIETRQAGYEF | Negative |
| P00154 | AGLMALGLASSAIAAGLSPE | Negative |
| P00154 | LSPEEQIETRQAGYEFMGWN | Negative |
| P00154 | GLSPEEQIETRQAGYEFMGW | Negative |
| P00154 | LMALGLASSAIAAGLSPEEQ | Negative |
| P00154 | AGLSPEEQIETRQAGYEFMG | Negative |
| P00154 | LGLASSAIAAGLSPEEQIET | Negative |
| P00154 | GLASSAIAAGLSPEEQIETR | Negative |
| P00154 | AAGLSPEEQIETRQAGYEFM | Negative |
| P00154 | MKHVLASTAAGLMALGLASS | Negative |
| P00154 | TAAGLMALGLASSAIAAGLS | Negative |
| P00154 | SAIAAGLSPEEQIETRQAGY | Negative |
| P00154 | ASSAIAAGLSPEEQIETRQA | Negative |
| P00154 | HVLASTAAGLMALGLASSAI | Negative |
| P00154 | AIAAGLSPEEQIETRQAGYE | Negative |
| P00154 | LASTAAGLMALGLASSAIAA | Negative |
| P00154 | VLASTAAGLMALGLASSAIA | Negative |
| P00260 | MINLVGFGTARASAPANAVA | Negative |
| P00260 | RDAVKVMLGTAAAI       | Negative |
| P00260 | PMINLVGFGTARASAPANAV | Negative |
| P00260 | SDKPISKSRDAVKVMLGTA  | Negative |
| P00260 | TAAAI                | Negative |
| P00260 | IPMINLVGFGTARASAPANA | Negative |
| P00260 | RRDAVKVMLGTAAAI      | Negative |
| P00260 | ISKSRDAVKVMLGTAAAI   | Negative |
| P00260 | PISKSRDAVKVMLGTAAAI  | Negative |
| P00260 | VMLGTAAAI            | Negative |
| P00260 | DKPISKSRDAVKVMLGTAA  | Negative |
| P00260 | AAAI                 | Negative |
| P00260 | AVKVMLGTAAAI         | Negative |
| P00260 | VGFGTARASAPANAVAADDA | Negative |
| P00260 | DAVKVMLGTAAAI        | Negative |
| P00260 | LGTAAI               | Negative |
| P00260 | KPISKSRDAVKVMLGTAA   | Negative |
| P00260 | MSDKPISKSRDAVKVMLGT  | Negative |
| P00260 | GTAAAI               | Negative |
| P00260 | VKVMLGTAAAI          | Negative |
| P00260 | SRRDAVKVMLGTAAAI     | Negative |
| P00260 | KSRRDAVKVMLGTAAAI    | Negative |
| P00260 | SKSRDAVKVMLGTAAAI    | Negative |
| P00260 | KVMLGTAAAI           | Negative |
| P00260 | MLGTAAAI             | Negative |
| P00260 | NLVGFGTARASAPANAVAAD | Negative |
| P00260 | LVGFGTARASAPANAVAADD | Negative |
| P00260 | INLVGFGTARASAPANAVAA | Negative |

|        |                        |          |
|--------|------------------------|----------|
| P00260 | AAIPMINLVGFGTARASAPA   | Negative |
| P00280 | SLPVLA AQCEATIESNDAMQ  | Negative |
| P00280 | VLSAASLPVLA AQCEATIES  | Negative |
| P00280 | AASLPVLA AQCEATIESNDA  | Negative |
| P00280 | MLAKATLAIVLSAASLPVLA   | Negative |
| P00280 | LSAASLPVLA AQCEATIESN  | Negative |
| P00280 | SN DAMQYNLKEMVVDK SCKQ | Negative |
| P00280 | KATLAIVLSAASLPVLA AQ   | Negative |
| P00280 | LAKATLAIVLSAASLPVLA    | Negative |
| P00280 | LPVLA AQCEATIESNDAMQY  | Negative |
| P00280 | PVLA AQCEATIESNDAMQYN  | Negative |
| P00280 | QCEATIESNDAMQYNLKEMV   | Negative |
| P00280 | IESNDAMQYNLKEMVVDKSC   | Negative |
| P00280 | AAQCEATIESNDAMQYNLKE   | Negative |
| P00280 | TIESNDAMQYNLKEMVVDKS   | Negative |
| P00280 | ATIESNDAMQYNLKEMVVDK   | Negative |
| P00280 | AIVLSAASLPVLA AQCEATI  | Negative |
| P00280 | LAAQCEATIESNDAMQYNLK   | Negative |
| P00280 | EATIESNDAMQYNLKEMVVD   | Negative |
| P00280 | NDAMQYNLKEMVVDK SCKQF  | Negative |
| P00280 | AKATLAIVLSAASLPVLA AQ  | Negative |
| P00280 | LAIVLSAASLPVLA AQCEAT  | Negative |
| P00280 | IVLSAASLPVLA AQCEATIE  | Negative |
| P00280 | ASLPVLA AQCEATIESNDAM  | Negative |
| P00280 | ATLAIVLSAASLPVLA AQCE  | Negative |
| P00280 | VLAAQCEATIESNDAMQYNL   | Negative |
| P00280 | CEATIESNDAMQYNLKEMVV   | Negative |
| P00280 | AQCEATIESNDAMQYNLKEM   | Negative |
| P00280 | SAASLPVLA AQCEATIESND  | Negative |
| P00280 | ESNDAMQYNLKEMVVDK SCK  | Negative |
| P00282 | SAPLLAAECSVDIQGNDQMQ   | Negative |
| P00282 | LRKLAAVSLLSLLSAPLLAA   | Negative |
| P00282 | LLAAECSVDIQGNDQMQFNT   | Negative |
| P00282 | LAAECSVDIQGNDQMQFNTN   | Negative |
| P00282 | RKLAAVSLLSLLSAPLLAAE   | Negative |
| P00282 | LSLLSAPLLAAECSVDIQGN   | Negative |
| P00282 | SLLSAPLLAAECSVDIQGND   | Negative |
| P00282 | MLRKLAAVSLLSLLSAPLLA   | Negative |
| P00282 | DIQGNDQMQFNTNAITVDKS   | Negative |
| P00282 | ECSVDIQGNDQMQFNTNAIT   | Negative |
| P00282 | SVDIQGNDQMQFNTNAITVD   | Negative |
| P00282 | AECSVDIQGNDQMQFNTNAI   | Negative |
| P00282 | KLAAVSLLSLLSAPLLAAEC   | Negative |
| P00282 | IQGNDQMQFNTNAITVDKSC   | Negative |
| P00282 | QGNDQMQFNTNAITVDK SCK  | Negative |
| P00282 | CSVDIQGNDQMQFNTNAITV   | Negative |

|        |                       |          |
|--------|-----------------------|----------|
| P00282 | LLSAPLLAAECSVDIQGNDQ  | Negative |
| P00282 | LSAPLLAAECSVDIQGNDQM  | Negative |
| P00282 | LLSLLSAPLLAAECSVDIQG  | Negative |
| P00282 | LA AVSLLSLLSAPLLAAECS | Negative |
| P00282 | SLLSLLSAPLLAAECSVDIQ  | Negative |
| P00282 | VSLLSLLSAPLLAAECSVDI  | Negative |
| P00282 | PLLAAECSVDIQGNDQMQFN  | Negative |
| P00282 | AAECSVDIQGNDQMQFNTNA  | Negative |
| P00282 | APLLAAECSVDIQGNDQMQF  | Negative |
| P00282 | AVSLLSLLSAPLLAAECSVD  | Negative |
| P00282 | GNDQMQFNTNAITVDKSKQ   | Negative |
| P00282 | VDIQGNDQMQFNTNAITVDK  | Negative |
| P00282 | NDQMQFNTNAITVDKSKQF   | Negative |
| P00433 | TLIPLVCLILHASLSDAQLT  | Negative |
| P00433 | HASLSDAQLTPTFYDNPCPN  | Negative |
| P00433 | LSDAQLTPTFYDNPCPNVSN  | Negative |
| P00433 | TLFTCITLIPLVCLILHASL  | Negative |
| P00433 | CITLIPLVCLILHASLSDAQ  | Negative |
| P00433 | AQLTPTFYDNPCPNVSNIVR  | Negative |
| P00433 | LIPLVCLILHASLSDAQLTPT | Negative |
| P00433 | DAQLTPTFYDNPCPNVSNIV  | Negative |
| P00433 | SDAQLTPTFYDNPCPNVSN   | Negative |
| P00433 | TCITLIPLVCLILHASLSDA  | Negative |
| P00433 | ITLIPLVCLILHASLSDAQL  | Negative |
| P00433 | SSSTLFTCITLIPLVCLILH  | Negative |
| P00433 | STLFTCITLIPLVCLILHAS  | Negative |
| P00433 | SLSDAQLTPTFYDNPCPNVS  | Negative |
| P00433 | LVCLILHASLSDAQLTPTFY  | Negative |
| P00433 | PLVCLILHASLSDAQLTPTF  | Negative |
| P00433 | CLILHASLSDAQLTPTFYDN  | Negative |
| P00433 | FTCITLIPLVCLILHASLSD  | Negative |
| P00433 | MHFSSSTLFTCITLIPLVC   | Negative |
| P00433 | SSSTLFTCITLIPLVCLIL   | Negative |
| P00433 | VCLILHASLSDAQLTPTFYD  | Negative |
| P00433 | HFSSSTLFTCITLIPLVCL   | Negative |
| P00433 | LFTCITLIPLVCLILHASLS  | Negative |
| P00433 | FSSSTLFTCITLIPLVCLI   | Negative |
| P00433 | SSTLFTCITLIPLVCLILHA  | Negative |
| P00433 | ILHASLSDAQLTPTFYDNPC  | Negative |
| P00433 | ASLSDAQLTPTFYDNPCPNV  | Negative |
| P00433 | LHASLSDAQLTPTFYDNPCP  | Negative |
| P00433 | LILHASLSDAQLTPTFYDNS  | Negative |
| P00446 | TLLFTALAFGLSHQALAQDL  | Negative |
| P00446 | KMTDLQTGKPVGTIELSQNK  | Negative |
| P00446 | DLTVKMTDLQTGKPVGTIEL  | Negative |
| P00446 | QDLTVKMTDLQTGKPVGTIE  | Negative |

|        |                      |          |
|--------|----------------------|----------|
| P00446 | ALAFGLSHQALAQDLTVKMT | Negative |
| P00446 | LLFTALAFGLSHQALAQDLT | Negative |
| P00446 | AKTLLFTALAFGLSHQALAQ | Negative |
| P00446 | HQALAQDLTVKMTDLQTGKP | Negative |
| P00446 | TALAFGLSHQALAQDLTVKM | Negative |
| P00446 | TDLQTGKPVGTIELSQNKYG | Negative |
| P00446 | AFGLSHQALAQDLTVKMTDL | Negative |
| P00446 | MNKAKTLLFTALAFGLSHQA | Negative |
| P00446 | VKMTDLQTGKPVGTIELSQN | Negative |
| P00446 | KTLLFTALAFGLSHQALAQD | Negative |
| P00446 | GLSHQALAQDLTVKMTDLQT | Negative |
| P00446 | LAFLSHQALAQDLTVKMTD  | Negative |
| P00446 | LAQDLTVKMTDLQTGKPVGT | Negative |
| P00446 | LTVKMTDLQTGKPVGTIELS | Negative |
| P00446 | SHQALAQDLTVKMTDLQTGK | Negative |
| P00446 | AQDLTVKMTDLQTGKPVGTI | Negative |
| P00446 | ALAQDLTVKMTDLQTGKPVG | Negative |
| P00446 | LSHQALAQDLTVKMTDLQTG | Negative |
| P00446 | NKAKTLLFTALAFGLSHQAL | Negative |
| P00446 | FTALAFGLSHQALAQDLTVK | Negative |
| P00446 | TVKMTDLQTGKPVGTIELSQ | Negative |
| P00446 | KAKTLLFTALAFGLSHQALA | Negative |
| P00446 | FGLSHQALAQDLTVKMTDLQ | Negative |
| P00446 | QALAQDLTVKMTDLQTGKPV | Negative |
| P00446 | MTDLQTGKPVGTIELSQNKY | Negative |
| P00450 | LCSTPAWAKEKHYYIGIET  | Negative |
| P00450 | YIGIETTWDYASDHGEKKL  | Negative |
| P00450 | KILILGIFLFLCSTPAWAKE | Negative |
| P00450 | ETTDYASDHGEKKLISVDT  | Negative |
| P00450 | ILILGIFLFLCSTPAWAKEK | Negative |
| P00450 | IETTDYASDHGEKKLISVD  | Negative |
| P00450 | IIETTDYASDHGEKKLISV  | Negative |
| P00450 | GIFLFLCSTPAWAKEKHYYI | Negative |
| P00450 | TPAWAKEKHYYIGIETTWD  | Negative |
| P00450 | WAKEKHYYIGIETTWDYAS  | Negative |
| P00450 | GIIETTDYASDHGEKKLIS  | Negative |
| P00450 | KEKHYYIGIETTWDYASDH  | Negative |
| P00450 | FLFLCSTPAWAKEKHYYIGI | Negative |
| P00450 | LFLCSTPAWAKEKHYYIGII | Negative |
| P00450 | AKEKHYYIGIETTWDYASD  | Negative |
| P00450 | IGIETTWDYASDHGEKKLI  | Negative |
| P00450 | CSTPAWAKEKHYYIGIETT  | Negative |
| P00450 | LILGIFLFLCSTPAWAKEKH | Negative |
| P00450 | KHYYIGIETTWDYASDHGE  | Negative |
| P00450 | LGIFLFLCSTPAWAKEKHYY | Negative |
| P00450 | FLCSTPAWAKEKHYYIGIIE | Negative |

|        |                       |          |
|--------|-----------------------|----------|
| P00450 | MKILILGIFLFLCSTPAWAK  | Negative |
| P00450 | YYIGIIE TTWDYASDHGEKK | Negative |
| P00450 | HYYIGIIE TTWDYASDHGEK | Negative |
| P00450 | PAWAKEKHYYIGIIE TTWDY | Negative |
| P00450 | EKHYYIGIIE TTWDYASDHG | Negative |
| P00450 | AWAKEKHYYIGIIE TTWDYA | Negative |
| P00450 | IFLFLCSTPAWAKEKHYYIG  | Negative |
| P00450 | STPAWAKEKHYYIGIIE TTW | Negative |
| P00588 | APPSAHAGADDVVDSSKSFV  | Negative |
| P00588 | AHAGADDVVDSSKSFVMENF  | Negative |
| P00588 | VSRKLFASILIGALLGIGAP  | Negative |
| P00588 | MLVRGYVVSRLKFASILIGA  | Negative |
| P00588 | LIGALLGIGAPPSAHAGADD  | Negative |
| P00588 | ILIGALLGIGAPPSAHAGAD  | Negative |
| P00588 | GALLGIGAPPSAHAGADDVV  | Negative |
| P00588 | SRKLFASILIGALLGIGAPP  | Negative |
| P00588 | GYVVSRLKFASILIGALLGI  | Negative |
| P00588 | RKLFASILIGALLGIGAPPS  | Negative |
| P00588 | GIGAPPSAHAGADDVVDSSK  | Negative |
| P00588 | PSAHAGADDVVDSSKSFVME  | Negative |
| P00588 | RGYVVSRLKFASILIGALLG  | Negative |
| P00588 | PPSAHAGADDVVDSSKSFVM  | Negative |
| P00588 | IGAPPSAHAGADDVVDSSKS  | Negative |
| P00588 | LGIGAPPSAHAGADDVVDSS  | Negative |
| P00588 | ALLGIGAPPSAHAGADDVVD  | Negative |
| P00588 | VVSRLKFASILIGALLGIGA  | Negative |
| P00588 | LLGIGAPPSAHAGADDVVD   | Negative |
| P00588 | KLFASILIGALLGIGAPPSA  | Negative |
| P00588 | FASILIGALLGIGAPPSAHA  | Negative |
| P00588 | ASILIGALLGIGAPPSAHAG  | Negative |
| P00588 | GAPPSAHAGADDVVDSSKSF  | Negative |
| P00588 | SILIGALLGIGAPPSAHAGA  | Negative |
| P00588 | YVVSRLKFASILIGALLGIG  | Negative |
| P00588 | LFASILIGALLGIGAPPSAH  | Negative |
| P00588 | VRGYVVSRLKFASILIGALL  | Negative |
| P00588 | SAHAGADDVVDSSKSFVMEN  | Negative |
| P00588 | LVRGYVVSRLKFASILIGAL  | Negative |
| P00615 | LLVLLAVCVSLLGASDIPPL  | Negative |
| P00615 | PLNLVQFGKMIECAIRNRRP  | Negative |
| P00615 | GASDIPPLPLNLVQFGKMIE  | Negative |
| P00615 | SDIPPLPLNLVQFGKMIECA  | Negative |
| P00615 | MHPAHLVLLAVCVSLLGAS   | Negative |
| P00615 | PPLPLNLVQFGKMIECAIRN  | Negative |
| P00615 | LLGASDIPPLPLNLVQFGKM  | Negative |
| P00615 | IPPLPLNLVQFGKMIECAIR  | Negative |
| P00615 | AVCVSLLGASDIPPLPLNLV  | Negative |



|        |                      |          |
|--------|----------------------|----------|
| P00615 | HLLVLLAVCVSLLGASDIPP | Negative |
| P00615 | HPAHLVLLAVCVSLLGASD  | Negative |
| P00615 | LGASDIPPLPLNLVQFGKMI | Negative |
| P00615 | SLLGASDIPPLPLNLVQFGK | Negative |
| P00615 | PAHLVLLAVCVSLLGASDI  | Negative |
| P00615 | DIPPLPLNLVQFGKMIECAI | Negative |
| P00615 | LNLVQFGKMIECAIRNRRPA | Negative |
| P00615 | PLPLNLVQFGKMIECAIRNR | Negative |
| P00615 | LPLNLVQFGKMIECAIRNR  | Negative |
| P00615 | LAVCVSLLGASDIPPLPLNL | Negative |
| P00615 | VCVSLLGASDIPPLPLNLVQ | Negative |
| P00615 | VSLLGASDIPPLPLNLVQFG | Negative |
| P00615 | VLLAVCVSLLGASDIPPLPL | Negative |
| P00615 | ASDIPPLPLNLVQFGKMIEC | Negative |
| P00615 | LLAVCVSLLGASDIPPLPLN | Negative |
| P00615 | VQFGKMIECAIRNRRPALDF | Negative |
| P00615 | LVQFGKMIECAIRNRRPALD | Negative |
| P00615 | LVLLAVCVSLLGASDIPPLP | Negative |
| P00615 | NLVQFGKMIECAIRNRRPAL | Negative |
| P00615 | AHLVLLAVCVSLLGASDIP  | Negative |
| P00616 | SLLGSSEIPQPSLDFEQFSN | Negative |
| P00616 | LLGSSEIPQPSLDFEQFSNM | Negative |
| P00616 | SSEIPQPSLDFEQFSNMIQC | Negative |
| P00616 | HPAHLVLLAVCVSLLGSSE  | Negative |
| P00616 | VSLLGSSEIPQPSLDFEQFS | Negative |
| P00616 | LVLLAVCVSLLGSSEIPQPS | Negative |
| P00616 | FEQFSNMIQCTIPCGESCLA | Negative |
| P00616 | EIPQPSLDFEQFSNMIQCTI | Negative |
| P00616 | SLDFEQFSNMIQCTIPCGES | Negative |
| P00616 | PSLDFEQFSNMIQCTIPCGE | Negative |
| P00616 | LDFEQFSNMIQCTIPCGESC | Negative |
| P00616 | LLVLLAVCVSLLGSSEIPQP | Negative |
| P00616 | AHLVLLAVCVSLLGSSEIP  | Negative |
| P00616 | VCVSLLGSSEIPQPSLDFEQ | Negative |
| P00616 | GSSEIPQPSLDFEQFSNMIQ | Negative |
| P00616 | AVCVSLLGSSEIPQPSLDFE | Negative |
| P00616 | IPQPSLDFEQFSNMIQCTIP | Negative |
| P00616 | MHPAHLVLLAVCVSLLGSS  | Negative |
| P00616 | LGSSEIPQPSLDFEQFSNMI | Negative |
| P00616 | VLLAVCVSLLGSSEIPQPSL | Negative |
| P00616 | LAVCVSLLGSSEIPQPSLDF | Negative |
| P00616 | PAHLVLLAVCVSLLGSSEI  | Negative |
| P00616 | EQFSNMIQCTIPCGESCLAY | Negative |
| P00616 | DFEQFSNMIQCTIPCGESCL | Negative |
| P00616 | SEIPQPSLDFEQFSNMIQCT | Negative |
| P00616 | CVSLLGSSEIPQPSLDFEQF | Negative |

|        |                       |          |
|--------|-----------------------|----------|
| P00616 | PQPSLDFEQFSNMIQCTIPC  | Negative |
| P00616 | QPSLDFEQFSNMIQCTIPCG  | Negative |
| P00616 | LLAVCVSLLGSSEIPQPSLD  | Negative |
| P00623 | LLGVEGSLVQFETLIMKVAK  | Negative |
| P00623 | IVAVLLLGVESLVLQFETLI  | Negative |
| P00623 | WIVAVLLLGVESLVLQFETL  | Negative |
| P00623 | VQFETLIMKVAKRSGLLWYS  | Negative |
| P00623 | KRSGLLWYSAYGCYCGWGGH  | Negative |
| P00623 | IMKVAKRSGLLWYSAYGCYC  | Negative |
| P00623 | VEGSLVQFETLIMKVAKRSG  | Negative |
| P00623 | QFETLIMKVAKRSGLLWYSA  | Negative |
| P00623 | SLVQFETLIMKVAKRSGLLW  | Negative |
| P00623 | KVAKRSGLLWYSAYGCYCGW  | Negative |
| P00623 | EGSLVQFETLIMKVAKRSGL  | Negative |
| P00623 | FETLIMKVAKRSGLLWYSAY  | Negative |
| P00623 | LLGVEGSLVQFETLIMKVA   | Negative |
| P00623 | LIMKVAKRSGLLWYSAYGCY  | Negative |
| P00623 | MRTLWIVAVLLLGVESLVLQ  | Negative |
| P00623 | VLLGVESLVLQFETLIMKV   | Negative |
| P00623 | GSLVQFETLIMKVAKRSGLL  | Negative |
| P00623 | LVQFETLIMKVAKRSGLLWY  | Negative |
| P00623 | ETLIMKVAKRSGLLWYSAYG  | Negative |
| P00623 | MKVAKRSGLLWYSAYGCYCG  | Negative |
| P00623 | TLIMKVAKRSGLLWYSAYGC  | Negative |
| P00623 | TLWIVAVLLLGVESLVLQFE  | Negative |
| P00623 | GVEGSLVQFETLIMKVAKRS  | Negative |
| P00623 | AVLLLGVEGSLVLQFETLIMK | Negative |
| P00623 | VAVLLLGVEGSLVLQFETLIM | Negative |
| P00623 | VAKRSGLLWYSAYGCYCGWG  | Negative |
| P00623 | LWIVAVLLLGVESLVLQFET  | Negative |
| P00623 | LGVEGSLVLQFETLIMKVAKR | Negative |
| P00623 | AKRSGLLWYSAYGCYCGWGG  | Negative |
| P00625 | GRSGVWWYGSYGCYCGAGGQ  | Negative |
| P00625 | HLMQFETLIMKIAGRSGVWW  | Negative |
| P00625 | LGVEGHLMQFETLIMKIAGR  | Negative |
| P00625 | TLIMKIAGRSGVWWYGSYGC  | Negative |
| P00625 | LLGVEGHLMQFETLIMKIAG  | Negative |
| P00625 | AGRSGVWWYGSYGCYCGAGG  | Negative |
| P00625 | ETLIMKIAGRSGVWWYGSYG  | Negative |
| P00625 | VEGHLMQFETLIMKIAGRSG  | Negative |
| P00625 | MKIAGRSGVWWYGSYGCYCG  | Negative |
| P00625 | MRTLWIMAVLLLGVEGHLMQ  | Negative |
| P00625 | EGHLMQFETLIMKIAGRSGV  | Negative |
| P00625 | TLWIMAVLLLGVEGHLMQFE  | Negative |
| P00625 | WIMAVLLLGVEGHLMQFETL  | Negative |
| P00625 | MQFETLIMKIAGRSGVWWYG  | Negative |

|        |                      |          |
|--------|----------------------|----------|
| P00625 | LMQFETLIMKIAGRSGVWWY | Negative |
| P00625 | GVEGHLMQFETLIMKIAGRS | Negative |
| P00625 | LLLGVEGHLMQFETLIMKIA | Negative |
| P00625 | FETLIMKIAGRSGVWWYGSY | Negative |
| P00625 | LWIMAVLLLGVGHLMQFET  | Negative |
| P00625 | GHLMQFETLIMKIAGRSGVW | Negative |
| P00625 | KIAGRSGVWWYGSYGCYCGA | Negative |
| P00625 | QFETLIMKIAGRSGVWWYGS | Negative |
| P00625 | IAGRSGVWWYGSYGCYCGAG | Negative |
| P00625 | LIMKIAGRSGVWWYGSYGCY | Negative |
| P00625 | IMAVLLLGVEGHLMQFETLI | Negative |
| P00625 | AVLLLGVEGHLMQFETLIMK | Negative |
| P00625 | MAVLLLGVEGHLMQFETLIM | Negative |
| P00625 | IMKIAGRSGVWWYGSYGCYC | Negative |
| P00625 | VLLLGVEGHLMQFETLIMKI | Negative |
| P00635 | ADVDKIGTQKDIFPFLGGAG | Negative |
| P00635 | NAGTIPLGKLADVDKIGTQK | Negative |
| P00635 | KIGTQKDIFPFLGGAGPYYS | Negative |
| P00635 | SLANAGTIPLGKLADVDKIG | Negative |
| P00635 | DVDKIGTQKDIFPFLGGAGP | Negative |
| P00635 | AASLANAGTIPLGKLADVDK | Negative |
| P00635 | VYSILAASLANAGTIPLGKL | Negative |
| P00635 | TIPLGKLADVDKIGTQKDIF | Negative |
| P00635 | VDKIGTQKDIFPFLGGAGPY | Negative |
| P00635 | ILAASLANAGTIPLGKLADV | Negative |
| P00635 | ANAGTIPLGKLADVDKIGTQ | Negative |
| P00635 | PLGKLADVDKIGTQKDIFPF | Negative |
| P00635 | DKIGTQKDIFPFLGGAGPYY | Negative |
| P00635 | VVYSILAASLANAGTIPLGK | Negative |
| P00635 | GTIPLGKLADVDKIGTQKDI | Negative |
| P00635 | LANAGTIPLGKLADVDKIGT | Negative |
| P00635 | SVVYSILAASLANAGTIPLG | Negative |
| P00635 | GKLADVDKIGTQKDIFPFLG | Negative |
| P00635 | LADVDKIGTQKDIFPFLGGA | Negative |
| P00635 | LGKLADVDKIGTQKDIFPFL | Negative |
| P00635 | SILAASLANAGTIPLGKLAD | Negative |
| P00635 | AGTIPLGKLADVDKIGTQKD | Negative |
| P00635 | FKSVVYSILAASLANAGTIP | Negative |
| P00635 | ASLANAGTIPLGKLADVDKI | Negative |
| P00635 | IPLGKLADVDKIGTQKDIFP | Negative |
| P00635 | LAASLANAGTIPLGKLADVD | Negative |
| P00635 | YSILAASLANAGTIPLGKLA | Negative |
| P00635 | KLADVDKIGTQKDIFPFLGG | Negative |
| P00635 | MFKSVVYSILAASLANAGTI | Negative |
| P00639 | RGTRLMGLLLALAGLLQLGL | Negative |
| P00639 | LQLGLSLKIAAFNIRTFGET | Negative |

|        |                      |          |
|--------|----------------------|----------|
| P00639 | IRTFGETKMSNATLASIVR  | Negative |
| P00639 | MRGTRLMGLLLALAGLLQLG | Negative |
| P00639 | LKIAAFNIRTFGETKMSNAT | Negative |
| P00639 | TRLMGLLLALAGLLQLGLSL | Negative |
| P00639 | SLKIAAFNIRTFGETKMSNA | Negative |
| P00639 | LGLSLKIAAFNIRTFGETKM | Negative |
| P00639 | IAAFNIRTFGETKMSNATLA | Negative |
| P00639 | NIRTFGETKMSNATLASIV  | Negative |
| P00639 | LAGLLQLGLSLKIAAFNIRT | Negative |
| P00639 | AAFNIRTFGETKMSNATLAS | Negative |
| P00639 | LLQLGLSLKIAAFNIRTFGE | Negative |
| P00639 | MGLLLALAGLLQLGLSLKIA | Negative |
| P00639 | LMGLLLALAGLLQLGLSLKI | Negative |
| P00639 | LSLKIAAFNIRTFGETKMSN | Negative |
| P00639 | RLMGLLLALAGLLQLGLSLK | Negative |
| P00639 | ALAGLLQLGLSLKIAAFNIR | Negative |
| P00639 | QLGLSLKIAAFNIRTFGETK | Negative |
| P00639 | AGLLQLGLSLKIAAFNIRTF | Negative |
| P00639 | GLSLKIAAFNIRTFGETKMS | Negative |
| P00639 | GLLQLGLSLKIAAFNIRTFG | Negative |
| P00639 | GTRLMGLLLALAGLLQLGLS | Negative |
| P00639 | FNIRTFGETKMSNATLASVI | Negative |
| P00639 | AFNIRTFGETKMSNATLASV | Negative |
| P00639 | KIAAFNIRTFGETKMSNATL | Negative |
| P00639 | LLLALAGLLQLGLSLKIAAF | Negative |
| P00639 | LALAGLLQLGLSLKIAAFNI | Negative |
| P00639 | LLALAGLLQLGLSLKIAAFN | Negative |
| P00651 | VERACDYTCGSNCYSSSDVS | Negative |
| P00651 | SKLLTLTLLLPTALALPSL  | Negative |
| P00651 | ERACDYTCGSNCYSSSDVST | Negative |
| P00651 | LLPTALALPSLVERACDYTC | Negative |
| P00651 | TLTLLLPTALALPSLVERA  | Negative |
| P00651 | LTLLLPTALALPSLVERAC  | Negative |
| P00651 | ACDYTCGSNCYSSSDVSTAQ | Negative |
| P00651 | KLLTLTLLLPTALALPSLV  | Negative |
| P00651 | TLLLPTALALPSLVERACDY | Negative |
| P00651 | YTCGSNCYSSSDVSTAQAAG | Negative |
| P00651 | YSKLLTLTLLLPTALALPS  | Negative |
| P00651 | ALALPSLVERACDYTCGSNC | Negative |
| P00651 | LTLTLLLPTALALPSLVER  | Negative |
| P00651 | LPSLVERACDYTCGSNCYSS | Negative |
| P00651 | MYSKLLTLTLLLPTALALP  | Negative |
| P00651 | MMYSKLLTLTLLLPTALAL  | Negative |
| P00651 | LPTALALPSLVERACDYTCG | Negative |
| P00651 | LVERACDYTCGSNCYSSSDV | Negative |
| P00651 | TALALPSLVERACDYTCGSN | Negative |

|        |                       |          |
|--------|-----------------------|----------|
| P00651 | PTALALPSLVERACDYTCGS  | Negative |
| P00651 | TTLTLLPTALALPSLVERACD | Negative |
| P00651 | ALPSLVERACDYTCGSNCYS  | Negative |
| P00651 | PSLVERACDYTCGSNCYSSS  | Negative |
| P00651 | DYTCGSNCYSSSDVSTAQAA  | Negative |
| P00651 | LLTLTTLTLLPTALALPSLVE | Negative |
| P00651 | SLVERACDYTCGSNCYSSSD  | Negative |
| P00651 | LALPSLVERACDYTCGSNCY  | Negative |
| P00651 | RACDYTCGSNCYSSSDVSTA  | Negative |
| P00651 | CDYTCGSNCYSSSDVSTAQA  | Negative |
| P00652 | ALLVPALAAPQGLDVRDCDY  | Negative |
| P00652 | VRDCDYTCGSHCYASAVSD   | Negative |
| P00652 | IAALLVPALAAPQGLDVRDC  | Negative |
| P00652 | MLYNKLITIAALLVPALAAP  | Negative |
| P00652 | AAPQGLDVRDCDYTCGSHCY  | Negative |
| P00652 | CDYTCGSHCYASAVSDAQS   | Negative |
| P00652 | RDCDYTCGSHCYASAVSDA   | Negative |
| P00652 | AALLVPALAAPQGLDVRDCD  | Negative |
| P00652 | ITIAALLVPALAAPQGLDVR  | Negative |
| P00652 | LYNKLITIAALLVPALAAPQ  | Negative |
| P00652 | PQGLDVRDCDYTCGSHCYSA  | Negative |
| P00652 | PALAAPQGLDVRDCDYTCGS  | Negative |
| P00652 | DVRDCDYTCGSHCYASAVS   | Negative |
| P00652 | LAAPQGLDVRDCDYTCGSHC  | Negative |
| P00652 | GLDVRDCDYTCGSHCYASAS  | Negative |
| P00652 | LVPALAAPQGLDVRDCDYTC  | Negative |
| P00652 | YTCGSHCYASAVSDAQSAG   | Negative |
| P00652 | LDVRDCDYTCGSHCYASAV   | Negative |
| P00652 | APQGLDVRDCDYTCGSHCYS  | Negative |
| P00652 | KLITIAALLVPALAAPQGLD  | Negative |
| P00652 | YNKLITIAALLVPALAAPQG  | Negative |
| P00652 | DCDYTCGSHCYASAVSDAQ   | Negative |
| P00652 | TIAALLVPALAAPQGLDVRD  | Negative |
| P00652 | LITIAALLVPALAAPQGLDV  | Negative |
| P00652 | QGLDVRDCDYTCGSHCYSAS  | Negative |
| P00652 | NKLITIAALLVPALAAPQGL  | Negative |
| P00652 | VPALAAPQGLDVRDCDYTCG  | Negative |
| P00652 | DYTCGSHCYASAVSDAQSA   | Negative |
| P00652 | ALAAPQGLDVRDCDYTCGSH  | Negative |
| P00655 | VALTAVTALAVPSPLEARAV  | Negative |
| P00655 | LTAVTALAVPSPLEARAVTW  | Negative |
| P00655 | EARAVTWTCLNDQKNPKTNK  | Negative |
| P00655 | VTWTCLNDQKNPKTNKYETK  | Negative |
| P00655 | VTALAVPSPLEARAVTWTCL  | Negative |
| P00655 | LVALTAVTALAVPSPLEARA  | Negative |
| P00655 | TALAVPSPLEARAVTWTCLN  | Negative |

|        |                      |          |
|--------|----------------------|----------|
| P00655 | LVLVALTAVTALAVPSPLEA | Negative |
| P00655 | MVAIKNLVLVALTAVTALAV | Negative |
| P00655 | TWTCLNDQKNPKTNKYETKR | Negative |
| P00655 | AVTWTCLNDQKNPKTNKYET | Negative |
| P00655 | NLVLVALTAVTALAVPSPLE | Negative |
| P00655 | RAVTWTCLNDQKNPKTNKYE | Negative |
| P00655 | ALAVPSPLEARAVTWTCLND | Negative |
| P00655 | AVTALAVPSPLEARAVTWT  | Negative |
| P00655 | PLEARAVTWTCLNDQKNPKT | Negative |
| P00655 | VSPLEARAVTWTCLNDQKN  | Negative |
| P00655 | VLVALTAVTALAVPSPLEAR | Negative |
| P00655 | AIKNLVLVALTAVTALAVPS | Negative |
| P00655 | PSPLEARAVTWTCLNDQKNP | Negative |
| P00655 | IKNLVLVALTAVTALAVPSP | Negative |
| P00655 | KNLVLVALTAVTALAVPSPL | Negative |
| P00655 | ARAVTWTCLNDQKNPKTNKY | Negative |
| P00655 | SPLEARAVTWTCLNDQKNPK | Negative |
| P00655 | LAVPSPLEARAVTWTCLNDQ | Negative |
| P00655 | VAIKNLVLVALTAVTALAVP | Negative |
| P00655 | LEARAVTWTCLNDQKNPKTN | Negative |
| P00655 | AVPSPLEARAVTWTCLNDQK | Negative |
| P00655 | ALTAVTALAVPSPLEARAVT | Negative |
| P00669 | SLVVLPLLVLVLLVRVQPS  | Negative |
| P00669 | LLVRVQPSLGKESAAAKFER | Negative |
| P00669 | ALKSLVVLPLLVLVLLVRV  | Negative |
| P00669 | ESAAAKFERQHMDSGNSPSS | Negative |
| P00669 | LVRVQPSLGKESAAAKFERQ | Negative |
| P00669 | PLLVLVLLVRVQPSLGKES  | Negative |
| P00669 | LKSLVVLPLLVLVLLVRVQ  | Negative |
| P00669 | SAAAKFERQHMDSGNSPSSS | Negative |
| P00669 | VVLPLLVLVLLVRVQPSLG  | Negative |
| P00669 | AAAKFERQHMDSGNSPSSSS | Negative |
| P00669 | PSLGKESAAAKFERQHMDSG | Negative |
| P00669 | LLLVRVQPSLGKESAAAKFE | Negative |
| P00669 | VQPSLGKESAAAKFERQHMD | Negative |
| P00669 | KSLVVLPLLVLVLLVRVQP  | Negative |
| P00669 | LPLLVLVLLVRVQPSLGKE  | Negative |
| P00669 | GKESAAAKFERQHMDSGNSP | Negative |
| P00669 | VLLVRVQPSLGKESAAAKF  | Negative |
| P00669 | MALKSLVVLPLLVLVLLVR  | Negative |
| P00669 | LVVLPLLVLVLLVRVQPSL  | Negative |
| P00669 | VLPLLVLVLLVRVQPSLGK  | Negative |
| P00669 | QPSLGKESAAAKFERQHMDS | Negative |
| P00669 | LVLLVRVQPSLGKESAAAK  | Negative |
| P00669 | VRVQPSLGKESAAAKFERQH | Negative |
| P00669 | SLGKESAAAKFERQHMDSGN | Negative |

|        |                       |          |
|--------|-----------------------|----------|
| P00669 | VLVLLLVVRVQPSLGKESAAA | Negative |
| P00669 | RVQPSLGKESAAAKFERQHM  | Negative |
| P00669 | LGKESAAAKFERQHMDSGNS  | Negative |
| P00669 | KESAAAKFERQHMDSGNSPS  | Negative |
| P00669 | LLVLVLLLVVRVQPSLGKESA | Negative |
| P00683 | LEKSLILFPLFFLLLGWVQP  | Negative |
| P00683 | KSLILFPLFFLLLGWVQPSL  | Negative |
| P00683 | MGLEKSLILFPLFFLLLGWV  | Negative |
| P00683 | SAAQKFQRQHMDPDGSSINS  | Negative |
| P00683 | LILFPLFFLLLGWVQPSLGR  | Negative |
| P00683 | SLGRESAAQKFQRQHMDPDG  | Negative |
| P00683 | FLLLGWVQPSLGRESAAQKF  | Negative |
| P00683 | LFPLFFLLLGWVQPSLGRES  | Negative |
| P00683 | SLILFPLFFLLLGWVQPSLG  | Negative |
| P00683 | LGRESAAQKFQRQHMDPDGS  | Negative |
| P00683 | GLEKSLILFPLFFLLLGWVQ  | Negative |
| P00683 | WVQPSLGRESAAQKFQRQHMD | Negative |
| P00683 | ILFPLFFLLLGWVQPSLGRE  | Negative |
| P00683 | LLLGWVQPSLGRESAAQKFQ  | Negative |
| P00683 | LGWVQPSLGRESAAQKFQRQ  | Negative |
| P00683 | FPLFFLLLGWVQPSLGRESA  | Negative |
| P00683 | LLGWVQPSLGRESAAQKFQR  | Negative |
| P00683 | EKSLILFPLFFLLLGWVQPS  | Negative |
| P00683 | GRESAAQKFQRQHMDPDGSS  | Negative |
| P00683 | VQPSLGRESAAQKFQRQHMD  | Negative |
| P00683 | RESAAQKFQRQHMDPDGSSI  | Negative |
| P00683 | AAQKFQRQHMDPDGSSINSP  | Negative |
| P00683 | PSLGRESAAQKFQRQHMDPD  | Negative |
| P00683 | LFLLLGWVQPSLGRESAAQ   | Negative |
| P00683 | GWVQPSLGRESAAQKFQRQH  | Negative |
| P00683 | AQKFQRQHMDPDGSSINSPT  | Negative |
| P00683 | FFLLLGWVQPSLGRESAAQK  | Negative |
| P00683 | QPSLGRESAAQKFQRQHMDP  | Negative |
| P00683 | ESAAQKFQRQHMDPDGSSIN  | Negative |
| P00684 | LEKSLFLFSLLVLVLGWVQP  | Negative |
| P00684 | WVQPSLGGESRESSADKFKR  | Negative |
| P00684 | LGWVQPSLGGESRESSADKF  | Negative |
| P00684 | VQPSLGGESRESSADKFKRQ  | Negative |
| P00684 | EKSLFLFSLLVLVLGWVQPS  | Negative |
| P00684 | VLGWVQPSLGGESRESSADK  | Negative |
| P00684 | GGESRESSADKFKRQHMDTE  | Negative |
| P00684 | LVLVLGWVQPSLGGESRESS  | Negative |
| P00684 | SLFLFSLLVLVLGWVQPSLG  | Negative |
| P00684 | SRESSADKFKRQHMDTEGPS  | Negative |
| P00684 | GLEKSLFLFSLLVLVLGWVQ  | Negative |
| P00684 | LFLFSLLVLVLGWVQPSLGG  | Negative |

|        |                       |          |
|--------|-----------------------|----------|
| P00684 | RESSADKFKRQHMDTEGPSK  | Negative |
| P00684 | LGGESRESSADKFKRQHMDT  | Negative |
| P00684 | LFSLLVLVLGWVQPSLGGES  | Negative |
| P00684 | VLVLGWVQPSLGGESRESSA  | Negative |
| P00684 | FLFSLLVLVLGWVQPSLGGE  | Negative |
| P00684 | PSLGGESRESSADKFKRQHM  | Negative |
| P00684 | GESRESSADKFKRQHMDTEG  | Negative |
| P00684 | QPSLGGESRESSADKFKRQH  | Negative |
| P00684 | GWVQPSLGGESRESSADKFK  | Negative |
| P00684 | KSLFLFSLLVLVLGWVQPSL  | Negative |
| P00684 | LVLGWVQPSLGGESRESSAD  | Negative |
| P00684 | MGLEKSLFLFSLLVLVLGWV  | Negative |
| P00684 | SLGGESRESSADKFKRQHMD  | Negative |
| P00684 | ESRESSADKFKRQHMDTEGP  | Negative |
| P00684 | LLVLVLGWVQPSLGGESRES  | Negative |
| P00684 | FSLVLVLVLGWVQPSLGGESR | Negative |
| P00684 | ESSADKFKRQHMDTEGPSKS  | Negative |
| P00692 | QKRKRTVSFRLVLMCTLLFV  | Negative |
| P00692 | SFRLVLMCTLLFVSLPITKT  | Negative |
| P00692 | KTSAVNGTLMQYFEWYTPND  | Negative |
| P00692 | RTVSFRLVLMCTLLFVSLPI  | Negative |
| P00692 | TKTSAVNGTLMQYFEWYTPN  | Negative |
| P00692 | RKRTVSFRLVLMCTLLFVSL  | Negative |
| P00692 | SAVNGTLMQYFEWYTPNDGQ  | Negative |
| P00692 | TVSFRLVLMCTLLFVSLPIT  | Negative |
| P00692 | TSAVNGTLMQYFEWYTPNDG  | Negative |
| P00692 | FRLVLMCTLLFVSLPITKTS  | Negative |
| P00692 | KRKRTVSFRLVLMCTLLFVS  | Negative |
| P00692 | LLFVSLPITKTSAVNGTLMQ  | Negative |
| P00692 | VLMCTLLFVSLPITKTSAVN  | Negative |
| P00692 | PITKTSAVNGTLMQYFEWYT  | Negative |
| P00692 | LVLMCTLLFVSLPITKTSAV  | Negative |
| P00692 | MIQKRKRTVSFRLVLMCTLL  | Negative |
| P00692 | RLVLMCTLLFVSLPITK TSA | Negative |
| P00692 | LMCTLLFVSLPITKTS AVNG | Negative |
| P00692 | ITKTSAVNGTLMQYFEWYTP  | Negative |
| P00692 | IQKRKRTVSFRLVLMCTLLF  | Negative |
| P00692 | TLLFVSLPITKTS AVNGTLM | Negative |
| P00692 | VSLPITKTS AVNGTLMQYFE | Negative |
| P00692 | MCTLLFVSLPITKTS AVNGT | Negative |
| P00692 | SLPITKTS AVNGTLMQYFEW | Negative |
| P00692 | LPITKTS AVNGTLMQYFEWY | Negative |
| P00692 | FVSLPITKTS AVNGTLMQYF | Negative |
| P00692 | LFVSLPITKTS AVNGTLMQY | Negative |
| P00692 | VSFRLVLMCTLLFVSLPITK  | Negative |
| P00692 | KRTVSFRLVLMCTLLFVSLP  | Negative |



|        |                       |          |
|--------|-----------------------|----------|
| P00697 | MKALLVLGFLLLSASVQAKI  | Negative |
| P00697 | QAKIYERCQFARTLKRNGMS  | Negative |
| P00697 | FARTLKRNGMSGYYGVSLAD  | Negative |
| P00697 | ARTLKRNGMSGYYGVSLADW  | Negative |
| P00697 | KIYERCQFARTLKRNGMSGY  | Negative |
| P00697 | GFLLLSASVQAKIYERCQFA  | Negative |
| P00697 | LVLGFLLLSASVQAKIYERC  | Negative |
| P00697 | RTLKRNGMSGYYGVSLADWV  | Negative |
| P00697 | FLLLSASVQAKIYERCQFAR  | Negative |
| P00697 | ALLVLGFLLLSASVQAKIYE  | Negative |
| P00697 | KALLVLGFLLLSASVQAKIY  | Negative |
| P00697 | ERCQFARTLKRNGMSGYYGV  | Negative |
| P00697 | YERCQFARTLKRNGMSGYYG  | Negative |
| P00697 | RCQFARTLKRNGMSGYYGVS  | Negative |
| P00697 | LLSASVQAKIYERCQFARTL  | Negative |
| P00697 | LSASVQAKIYERCQFARTLK  | Negative |
| P00697 | LLLSASVQAKIYERCQFART  | Negative |
| P00697 | LGFLLLSASVQAKIYERCQF  | Negative |
| P00697 | SASVQAKIYERCQFARTLKR  | Negative |
| P00697 | CQFARTLKRNGMSGYYGVSL  | Negative |
| P00697 | LKRNGMSGYYGVSLADWVCL  | Negative |
| P00697 | VLGFLLLSASVQAKIYERCQ  | Negative |
| P00697 | AKIYERCQFARTLKRNGMSG  | Negative |
| P00697 | VQAKIYERCQFARTLKRNGM  | Negative |
| P00697 | IYERCQFARTLKRNGMSGYY  | Negative |
| P00697 | TLKRNGMSGYYGVSLADWVC  | Negative |
| P00697 | ASVQAKIYERCQFARTLKRN  | Negative |
| P00697 | SVQAKIYERCQFARTLKRNG  | Negative |
| P00697 | QFARTLKRNGMSGYYGVSLA  | Negative |
| P00698 | AALGKVFGRCELAAAMKRHG  | Negative |
| P00698 | LVLFCFLPLAALGKVFGRCEL | Negative |
| P00698 | CFLPLAALGKVFGRCELAAA  | Negative |
| P00698 | LGKVFGRCELAAAMKRHGLD  | Negative |
| P00698 | VLCFLPLAALGKVFGRCELA  | Negative |
| P00698 | SLLILVLCFLPLAALGKVFG  | Negative |
| P00698 | CELAAAMKRHGLDNYRGYSL  | Negative |
| P00698 | ELAAAMKRHGLDNYRGYSLG  | Negative |
| P00698 | LCFLPLAALGKVFGRCELAA  | Negative |
| P00698 | KVFGRCELAAAMKRHGLDNY  | Negative |
| P00698 | GRCELAAAMKRHGLDNYRGY  | Negative |
| P00698 | RSLILVLCFLPLAALGKV    | Negative |
| P00698 | AAAMKRHGLDNYRGYSLGNW  | Negative |
| P00698 | LAAAMKRHGLDNYRGYSLGN  | Negative |
| P00698 | ALGKVFGRCELAAAMKRHGL  | Negative |
| P00698 | GKVFGRCELAAAMKRHGLDN  | Negative |
| P00698 | MRSLLILVLCFLPLAALGKV  | Negative |

|        |                        |          |
|--------|------------------------|----------|
| P00698 | VFGRCELAAAMKRHGLDNYR   | Negative |
| P00698 | AAMKRHGLDNYRGYSLGNWV   | Negative |
| P00698 | LILVLCFLPLAALGKVFGRC   | Negative |
| P00698 | ILVLCFLPLAALGKVFGRC    | Negative |
| P00698 | MKRHGLDNYRGYSLGNWVCA   | Negative |
| P00698 | RCELAAAMKRHGLDNYRGYS   | Negative |
| P00698 | FGRCELAAAMKRHGLDNYRG   | Negative |
| P00698 | PLAALGKVFGRCCELAAAMKR  | Negative |
| P00698 | LPLAALGKVFGRCCELAAAMK  | Negative |
| P00698 | AMKRHGLDNYRGYSLGNWVC   | Negative |
| P00698 | FLPLAALGKVFGRCCELAAAM  | Negative |
| P00698 | LAALGKVFGRCCELAAAMKRH  | Negative |
| P00701 | ALGKVYGRCELAAAMKRHGL   | Negative |
| P00701 | VLVLCFLPLAALGKVYGRCE   | Negative |
| P00701 | PLAALGKVYGRCELAAAMKR   | Negative |
| P00701 | VLCFLPLAALGKVYGRCELA   | Negative |
| P00701 | AAAMKRHGLDKYQGYS LGNW  | Negative |
| P00701 | CFLPLAALGKVYGRCELAAA   | Negative |
| P00701 | RSLVLVLCFLPLAALGKVY    | Negative |
| P00701 | FLPLAALGKVYGRCELAAAM   | Negative |
| P00701 | AAMKRHGLDKYQGYS LGNWV  | Negative |
| P00701 | AMKRHGLDKYQGYS LGNWVC  | Negative |
| P00701 | LAALGKVYGRCELAAAMKRH   | Negative |
| P00701 | LGKVYGRCELAAAMKRHGLD   | Negative |
| P00701 | KVYGRCELAAAMKRHGLDKY   | Negative |
| P00701 | AALGKVYGRCELAAAMKRHG   | Negative |
| P00701 | MRSLLVLVLCFLPLAALGKV   | Negative |
| P00701 | GRCELAAAMKRHGLDKYQGY   | Negative |
| P00701 | VYGRCELAAAMKRHGLDKYQ   | Negative |
| P00701 | SLLVLVLCFLPLAALGKVYG   | Negative |
| P00701 | LAAAMKRHGLDKYQGYS LGN  | Negative |
| P00701 | CELAAAMKRHGLDKYQGYS L  | Negative |
| P00701 | LVLVLCFLPLAALGKVYGRCEL | Negative |
| P00701 | GKVYGRCELAAAMKRHGLDK   | Negative |
| P00701 | LCFLPLAALGKVYGRCELAA   | Negative |
| P00701 | MKRHGLDKYQGYS LGNWVCA  | Negative |
| P00701 | YGRCELAAAMKRHGLDKYQG   | Negative |
| P00701 | LPLAALGKVYGRCELAAAMK   | Negative |
| P00701 | ELAAAMKRHGLDKYQGYS LG  | Negative |
| P00701 | LVLVLCFLPLAALGKVYGR    | Negative |
| P00701 | RCELAAAMKRHGLDKYQGY    | Negative |
| P00702 | LCFLPLAAPGKVYGRCELAA   | Negative |
| P00702 | CFLPLAAPGKVYGRCELAAA   | Negative |
| P00702 | RCELAAAMKRMGLDNYRGYS   | Negative |
| P00702 | ILVLCFLPLAAPGKVYGRCE   | Negative |
| P00702 | LILVLCFLPLAAPGKVYGR    | Negative |

|        |                      |          |
|--------|----------------------|----------|
| P00702 | LAAAMKRMGLDNYRGYSLGN | Negative |
| P00702 | CELAAAMKRMGLDNYRGYSL | Negative |
| P00702 | RSLILVLCFLPLAAPGKVY  | Negative |
| P00702 | AMKRMGLDNYRGYSLGNWVC | Negative |
| P00702 | KVYGRCELAAAMKRMGLDNY | Negative |
| P00702 | GRCELAAAMKRMGLDNYRGY | Negative |
| P00702 | FLPLAAPGKVYGRCELAAAM | Negative |
| P00702 | PGKVYGRCELAAAMKRMGLD | Negative |
| P00702 | GKVYGRCELAAAMKRMGLDN | Negative |
| P00702 | MRSLLILVLCFLPLAAPGKV | Negative |
| P00702 | APGKVYGRCELAAAMKRMGL | Negative |
| P00702 | VLCFLPLAAPGKVYGRCELA | Negative |
| P00702 | LAAPGKVYGRCELAAAMKRM | Negative |
| P00702 | AAPGKVYGRCELAAAMKRMG | Negative |
| P00702 | AAAMKRMGLDNYRGYSLGNW | Negative |
| P00702 | AAMKRMGLDNYRGYSLGNWV | Negative |
| P00702 | YGRCELAAAMKRMGLDNYRG | Negative |
| P00702 | ELAAAMKRMGLDNYRGYSLG | Negative |
| P00702 | LLILVLCFLPLAAPGKVYGR | Negative |
| P00702 | LVLCFLPLAAPGKVYGRCEL | Negative |
| P00702 | VYGRCELAAAMKRMGLDNYR | Negative |
| P00702 | LPLAAPGKVYGRCELAAAMK | Negative |
| P00702 | MKRMGLDNYRGYSLGNWVCA | Negative |
| P00702 | PLAAPGKVYGRCELAAAMKR | Negative |
| P00703 | VYGRCELAAAMKRLGLDNYR | Negative |
| P00703 | KVYGRCELAAAMKRLGLDNY | Negative |
| P00703 | SLLILVLCFLPLAALGKVYG | Negative |
| P00703 | AALGKVYGRCELAAAMKRLG | Negative |
| P00703 | AAAMKRLGLDNYRGYSLGNW | Negative |
| P00703 | PLAALGKVYGRCELAAAMKR | Negative |
| P00703 | LCFLPLAALGKVYGRCELAA | Negative |
| P00703 | MKRLGLDNYRGYSLGNWVCA | Negative |
| P00703 | ILVLCFLPLAALGKVYGRCE | Negative |
| P00703 | AMKRLGLDNYRGYSLGNWVC | Negative |
| P00703 | RCELAAAMKRLGLDNYRGYS | Negative |
| P00703 | LGKVYGRCELAAAMKRLGLD | Negative |
| P00703 | FLPLAALGKVYGRCELAAAM | Negative |
| P00703 | AAMKRLGLDNYRGYSLGNWV | Negative |
| P00703 | GKVYGRCELAAAMKRLGLDN | Negative |
| P00703 | LPLAALGKVYGRCELAAAMK | Negative |
| P00703 | LILVLCFLPLAALGKVYGR  | Negative |
| P00703 | ELAAAMKRLGLDNYRGYSLG | Negative |
| P00703 | CELAAAMKRLGLDNYRGYSL | Negative |
| P00703 | CFLPLAALGKVYGRCELAAA | Negative |
| P00703 | MRSLLILVLCFLPLAALGKV | Negative |
| P00703 | YGRCELAAAMKRLGLDNYRG | Negative |

|        |                      |          |
|--------|----------------------|----------|
| P00703 | GRCELAAAMKRLGLDNYRGY | Negative |
| P00703 | LAALGKVYGRCELAAAMKRL | Negative |
| P00703 | RSLILVLCFLPLAALGKVY  | Negative |
| P00703 | LVLCFLPLAALGKVYGRCEL | Negative |
| P00703 | ALGKVYGRCELAAAMKRLGL | Negative |
| P00703 | VLCFLPLAALGKVYGRCELA | Negative |
| P00703 | LAAAMKRLGLDNYRGYSLGN | Negative |
| P00705 | AAQGKVYSRCELAAAMKRLG | Negative |
| P00705 | AAAMKRLGLDNYRGYSLGNW | Negative |
| P00705 | KALLTLVFCLLPLAAQGKVY | Negative |
| P00705 | LLPLAAQGKVYSRCELAAAM | Negative |
| P00705 | PLAAQGKVYSRCELAAAMKR | Negative |
| P00705 | KVYSRCELAAAMKRLGLDNY | Negative |
| P00705 | LPLAAQGKVYSRCELAAAMK | Negative |
| P00705 | FCLLPLAAQGKVYSRCELAA | Negative |
| P00705 | ALLTLVFCLLPLAAQGKVYS | Negative |
| P00705 | MKALLTLVFCLLPLAAQGKV | Negative |
| P00705 | CLLPLAAQGKVYSRCELAAA | Negative |
| P00705 | MKRLGLDNYRGYSLGNWVCA | Negative |
| P00705 | LTLVFCLLPLAAQGKVYSRC | Negative |
| P00705 | LVFCLLPLAAQGKVYSRCEL | Negative |
| P00705 | CELAAAMKRLGLDNYRGYSL | Negative |
| P00705 | AAMKRLGLDNYRGYSLGNWV | Negative |
| P00705 | LAAQGKVYSRCELAAAMKRL | Negative |
| P00705 | ELAAAMKRLGLDNYRGYSLG | Negative |
| P00705 | VYSRCELAAAMKRLGLDNYR | Negative |
| P00705 | AMKRLGLDNYRGYSLGNWVC | Negative |
| P00705 | YSRCELAAAMKRLGLDNYRG | Negative |
| P00705 | GKVYSRCELAAAMKRLGLDN | Negative |
| P00705 | LAAAMKRLGLDNYRGYSLGN | Negative |
| P00705 | AQGKVYSRCELAAAMKRLGL | Negative |
| P00705 | RCELAAAMKRLGLDNYRGYS | Negative |
| P00705 | SRCELAAAMKRLGLDNYRGY | Negative |
| P00705 | QGKVYSRCELAAAMKRLGLD | Negative |
| P00705 | VFCLLPLAAQGKVYSRCELA | Negative |
| P00705 | TLVFCLLPLAAQGKVYSRCE | Negative |
| P00709 | MRFFVPLFLVGILFPAILAK | Negative |
| P00709 | PLFLVGILFPAILAKQFTKC | Negative |
| P00709 | FVPLFLVGILFPAILAKQFT | Negative |
| P00709 | CELSQLLKDIDGYGGIALPE | Negative |
| P00709 | VGILFPAILAKQFTKCELSQ | Negative |
| P00709 | FLVGILFPAILAKQFTKCEL | Negative |
| P00709 | LAKQFTKCELSQLLKDIDGY | Negative |
| P00709 | LLKDIDGYGGIALPEICTM  | Negative |
| P00709 | ILFPAILAKQFTKCELSQLL | Negative |
| P00709 | FFVPLFLVGILFPAILAKQF | Negative |

|        |                      |          |
|--------|----------------------|----------|
| P00709 | LVGILFPAILAKQFTKCELS | Negative |
| P00709 | QFTKCELSQLLKDIDGYGGI | Negative |
| P00709 | GILFPAILAKQFTKCELSQL | Negative |
| P00709 | LSQLLKDIDGYGGIALPELI | Negative |
| P00709 | FTKCELSQLLKDIDGYGGIA | Negative |
| P00709 | ILAKQFTKCELSQLLKDIDG | Negative |
| P00709 | ELSQLLKDIDGYGGIALPEL | Negative |
| P00709 | PAILAKQFTKCELSQLLKDI | Negative |
| P00709 | QLLKDIDGYGGIALPELICT | Negative |
| P00709 | LFPAILAKQFTKCELSQLLK | Negative |
| P00709 | TKCELSQLLKDIDGYGGIAL | Negative |
| P00709 | LFLVGILFPAILAKQFTKCE | Negative |
| P00709 | SQLLKDIDGYGGIALPELIC | Negative |
| P00709 | AILAKQFTKCELSQLLKDID | Negative |
| P00709 | AKQFTKCELSQLLKDIDGYG | Negative |
| P00709 | KCELSQLLKDIDGYGGIALP | Negative |
| P00709 | KQFTKCELSQLLKDIDGYGG | Negative |
| P00709 | FPAILAKQFTKCELSQLLKD | Negative |
| P00709 | RFFVPLFLVGILFPAILAKQ | Negative |
| P00712 | KLKDLKDYGGVSLPEWVCTA | Negative |
| P00712 | TKCEVFQKLKDLKDYGGVSL | Negative |
| P00712 | CEVFQKLKDLKDYGGVSLPE | Negative |
| P00712 | GILFHATQAEQLTKCEVFQK | Negative |
| P00712 | FQKLKDLKDYGGVSLPEWVC | Negative |
| P00712 | FHATQAEQLTKCEVFQKLKD | Negative |
| P00712 | LFHATQAEQLTKCEVFQKLK | Negative |
| P00712 | MSFVSLLLVGILFHATQAEQ | Negative |
| P00712 | VFQKLKDLKDYGGVSLPEWV | Negative |
| P00712 | ILFHATQAEQLTKCEVFQKL | Negative |
| P00712 | KCEVFQKLKDLKDYGGVSLP | Negative |
| P00712 | LLVGILFHATQAEQLTKCE  | Negative |
| P00712 | QKLKDLKDYGGVSLPEWVCT | Negative |
| P00712 | AEQLTKCEVFQKLKDLKDYG | Negative |
| P00712 | LLVGILFHATQAEQLTKCEV | Negative |
| P00712 | LVGILFHATQAEQLTKCEVF | Negative |
| P00712 | QLTKCEVFQKLKDLKDYGGV | Negative |
| P00712 | LTKCEVFQKLKDLKDYGGVS | Negative |
| P00712 | SLLLVGILFHATQAEQLTKC | Negative |
| P00712 | MMSFVSLLLVGILFHATQAE | Negative |
| P00712 | HATQAEQLTKCEVFQKLKDL | Negative |
| P00712 | TQAEQLTKCEVFQKLKDLKD | Negative |
| P00712 | QAEQLTKCEVFQKLKDLKDY | Negative |
| P00712 | EVFQKLKDLKDYGGVSLPEW | Negative |
| P00712 | VGILFHATQAEQLTKCEVFQ | Negative |
| P00712 | EQLTKCEVFQKLKDLKDYGG | Negative |
| P00712 | ATQAEQLTKCEVFQKLKDLK | Negative |

|        |                      |          |
|--------|----------------------|----------|
| P00712 | SFVSLLLVGILFHATQAEQL | Negative |
| P00713 | LVGILFPAVQAKQLTKCALS | Negative |
| P00713 | SHELNDLAGYRDITLPEWLC | Negative |
| P00713 | MMSFFPLLLVGILFPAVQAK | Negative |
| P00713 | LSHELNDLAGYRDITLPEWL | Negative |
| P00713 | VQAKQLTKCALSHELNDLAG | Negative |
| P00713 | KCALSHELNDLAGYRDITLP | Negative |
| P00713 | CALSHELNDLAGYRDITLPE | Negative |
| P00713 | LTKCALSHELNDLAGYRDIT | Negative |
| P00713 | FPAVQAKQLTKCALSHELND | Negative |
| P00713 | AKQLTKCALSHELNDLAGYR | Negative |
| P00713 | GILFPAVQAKQLTKCALSHE | Negative |
| P00713 | ALSHELNDLAGYRDITLPEW | Negative |
| P00713 | MSFFPLLLVGILFPAVQAKQ | Negative |
| P00713 | ELNDLAGYRDITLPEWLCII | Negative |
| P00713 | VGILFPAVQAKQLTKCALSH | Negative |
| P00713 | FFPLLLVGILFPAVQAKQLT | Negative |
| P00713 | HELNDLAGYRDITLPEWLCI | Negative |
| P00713 | SFFPLLLVGILFPAVQAKQL | Negative |
| P00713 | ILFPAVQAKQLTKCALSHEL | Negative |
| P00713 | PLLLVGILFPAVQAKQLTKC | Negative |
| P00713 | LFPVQAKQLTKCALSHELN  | Negative |
| P00713 | QAKQLTKCALSHELNDLAGY | Negative |
| P00713 | LLVGILFPAVQAKQLTKCAL | Negative |
| P00713 | AVQAKQLTKCALSHELNDLA | Negative |
| P00713 | QLTKCALSHELNDLAGYRDI | Negative |
| P00713 | PAVQAKQLTKCALSHELNDL | Negative |
| P00713 | TKCALSHELNDLAGYRDITL | Negative |
| P00713 | KQLTKCALSHELNDLAGYRD | Negative |
| P00713 | LLVGILFPAVQAKQLTKCA  | Negative |
| P00714 | SHAIEDMDGYQGISLLEWTC | Negative |
| P00714 | AIEDMDGYQGISLLEWTCVL | Negative |
| P00714 | FQATEFTKCEVSHAIEDMDG | Negative |
| P00714 | CEVSHAIEDMDGYQGISLLE | Negative |
| P00714 | TEFTKCEVSHAIEDMDGYQG | Negative |
| P00714 | TKCEVSHAIEDMDGYQGISL | Negative |
| P00714 | CISLPAFQATEFTKCEVSHA | Negative |
| P00714 | QATEFTKCEVSHAIEDMDGY | Negative |
| P00714 | ATEFTKCEVSHAIEDMDGYQ | Negative |
| P00714 | PLFLACISLPAFQATEFTKC | Negative |
| P00714 | FLACISLPAFQATEFTKCEV | Negative |
| P00714 | KCEVSHAIEDMDGYQGISLL | Negative |
| P00714 | AFQATEFTKCEVSHAIEDMD | Negative |
| P00714 | LACISLPAFQATEFTKCEVS | Negative |
| P00714 | HAIEDMDGYQGISLLEWTCV | Negative |
| P00714 | FVPLFLACISLPAFQATEFT | Negative |

|        |                      |          |
|--------|----------------------|----------|
| P00714 | PAFQATEFTKCEVSHAIEDM | Negative |
| P00714 | MMRFVPLFLACISLPAFQAT | Negative |
| P00714 | ACISLPAFQATEFTKCEVSH | Negative |
| P00714 | ISLPAFQATEFTKCEVSHAI | Negative |
| P00714 | RFVPLFLACISLPAFQATEF | Negative |
| P00714 | LPAFQATEFTKCEVSHAIED | Negative |
| P00714 | MRFVPLFLACISLPAFQATE | Negative |
| P00714 | EFTKCEVSHAIEDMDGYQGI | Negative |
| P00714 | EVSHAIEDMDGYQGISLLEW | Negative |
| P00714 | SLPAFQATEFTKCEVSHAIE | Negative |
| P00714 | LFLACISLPAFQATEFTKCE | Negative |
| P00714 | FTKCEVSHAIEDMDGYQGIS | Negative |
| P00714 | VSHAIEDMDGYQGISLLEWT | Negative |
| P00716 | PLVPLLLVSIVFPGIQATQL | Negative |
| P00716 | TQLTRCELTEKLKELDGYRD | Negative |
| P00716 | LTRCELTEKLKELDGYRDIS | Negative |
| P00716 | KLKELDGYRDISMSEWICTL | Negative |
| P00716 | QATQLTRCELTEKLKELDGY | Negative |
| P00716 | RCELTEKLKELDGYRDISMS | Negative |
| P00716 | GIQATQLTRCELTEKLKELD | Negative |
| P00716 | SIVFPGIQATQLTRCELTEK | Negative |
| P00716 | IVFPGIQATQLTRCELTEKL | Negative |
| P00716 | VFPGIQATQLTRCELTEKLK | Negative |
| P00716 | CELTEKLKELDGYRDISMSE | Negative |
| P00716 | EKLKELDGYRDISMSEWICT | Negative |
| P00716 | TEKLKELDGYRDISMSEWIC | Negative |
| P00716 | PGIQATQLTRCELTEKLKEL | Negative |
| P00716 | MPLVPLLLVSIVFPGIQATQ | Negative |
| P00716 | TRCELTEKLKELDGYRDISM | Negative |
| P00716 | ATQLTRCELTEKLKELDGYR | Negative |
| P00716 | LVSIVFPGIQATQLTRCELT | Negative |
| P00716 | PLLLVSIVFPGIQATQLTRC | Negative |
| P00716 | LTEKLKELDGYRDISMSEWI | Negative |
| P00716 | VSIVFPGIQATQLTRCELTE | Negative |
| P00716 | IQATQLTRCELTEKLKELDG | Negative |
| P00716 | FPGIQATQLTRCELTEKLKE | Negative |
| P00716 | QLTRCELTEKLKELDGYRDI | Negative |
| P00716 | LVPLLLVSIVFPGIQATQLT | Negative |
| P00716 | LLLVSIVFPGIQATQLTRCE | Negative |
| P00716 | MMPLVPLLLVSIVFPGIQAT | Negative |
| P00716 | ELTEKLKELDGYRDISMSEW | Negative |
| P00716 | LLVSIVFPGIQATQLTRCEL | Negative |
| P00719 | ALLGTSQSRTGCYGDVNRVD | Negative |
| P00719 | LGTSQSRTGCYGDVNRVDTT | Negative |
| P00719 | YGDVNRVDTTGASCKSAKPE | Negative |
| P00719 | TSQSRTGCYGDVNRVDTTGA | Negative |

|        |                       |          |
|--------|-----------------------|----------|
| P00719 | LMLVLLGLAALLGTSQSRTG  | Negative |
| P00719 | GCYGDVNRVDTTGASCKSAK  | Negative |
| P00719 | QSRTGCYGDVNRVDTTGASC  | Negative |
| P00719 | GTSQSRTGCYGDVNRVDTTG  | Negative |
| P00719 | VNRVDTTGASCKSAKPEKLN  | Negative |
| P00719 | LLGTSQSRTGCYGDVNRVDT  | Negative |
| P00719 | MLVLLGLAALLGTSQSRTGC  | Negative |
| P00719 | GDVNRVDTTGASCKSAKPEK  | Negative |
| P00719 | SQSRTGCYGDVNRVDTTGAS  | Negative |
| P00719 | LGLAALLGTSQSRTGCYGDV  | Negative |
| P00719 | SRTGCYGDVNRVDTTGASCK  | Negative |
| P00719 | RVDTTGASCKSAKPEKLN    | Negative |
| P00719 | VLLGLAALLGTSQSRTGCYG  | Negative |
| P00719 | HLMLVLLGLAALLGTSQSRT  | Negative |
| P00719 | NRVDTTGASCKSAKPEKLN   | Negative |
| P00719 | DVNRVDTTGASCKSAKPEKL  | Negative |
| P00719 | AALLGTSQSRTGCYGDVNRV  | Negative |
| P00719 | GLAALLGTSQSRTGCYGDVN  | Negative |
| P00719 | RTGCYGDVNRVDTTGASCKS  | Negative |
| P00719 | TGCYGDVNRVDTTGASCKSA  | Negative |
| P00719 | MHLMLVLLGLAALLGTSQSR  | Negative |
| P00719 | CYGDVNRVDTTGASCKSAKP  | Negative |
| P00719 | LLGLAALLGTSQSRTGCYGD  | Negative |
| P00719 | VDTTGASCKSAKPEKLN     | Negative |
| P00719 | LAALLGTSQSRTGCYGDVNR  | Negative |
| P00724 | ASMTNETSDRPLVHFTPNGK  | Negative |
| P00724 | AAKISASMTNETSDRPLVHF  | Negative |
| P00724 | AGFAAKISASMTNETSDRPL  | Negative |
| P00724 | QAFLFLLAGFAAKISASMTN  | Negative |
| P00724 | SASMTNETSDRPLVHFTPNGK | Negative |
| P00724 | RPLVHFTPNGKWMNDPNGLW  | Negative |
| P00724 | DRPLVHFTPNGKWMNDPNGL  | Negative |
| P00724 | FAAKISASMTNETSDRPLVH  | Negative |
| P00724 | GFAAKISASMTNETSDRPLV  | Negative |
| P00724 | MTNETSDRPLVHFTPNGKWM  | Negative |
| P00724 | LLQAFLFLLAGFAAKISASM  | Negative |
| P00724 | TNETSDRPLVHFTPNGKWMN  | Negative |
| P00724 | TSDRPLVHFTPNGKWMNDPN  | Negative |
| P00724 | FLFLLAGFAAKISASMTNET  | Negative |
| P00724 | AKISASMTNETSDRPLVHFT  | Negative |
| P00724 | LVHFTPNGKWMNDPNGLWYD  | Negative |
| P00724 | SMTNETSDRPLVHFTPNGKW  | Negative |
| P00724 | SDRPLVHFTPNGKWMNDPNG  | Negative |
| P00724 | LQAFLFLLAGFAAKISASMT  | Negative |
| P00724 | PLVHFTPNGKWMNDPNGLWY  | Negative |
| P00724 | FLLAGFAAKISASMTNETSD  | Negative |



|        |                      |          |
|--------|----------------------|----------|
| P00724 | LAGFAAKISASMTNETSDRP | Negative |
| P00724 | LLAGFAAKISASMTNETSDR | Negative |
| P00724 | KISASMTNETSDRPLVHFTP | Negative |
| P00724 | MLLQAFLFLLAGFAAKISAS | Negative |
| P00724 | LFLAGFAAKISASMTNETS  | Negative |
| P00724 | ISASMTNETSDRPLVHFTPN | Negative |
| P00724 | NETSDRPLVHFTPNKGWMND | Negative |
| P00724 | ETSDRPLVHFTPNKGWMNDP | Negative |
| P00730 | DFVGHQVLRITAADAEVQT  | Negative |
| P00730 | ILSVLLGAALGKEDFVGHQV | Negative |
| P00730 | GKEDFVGHQVLRITAADAE  | Negative |
| P00730 | SVLLGAALGKEDFVGHQVLR | Negative |
| P00730 | LGAALGKEDFVGHQVLRITA | Negative |
| P00730 | ITAADEAEVQTVKELEDLEH | Negative |
| P00730 | GHQVLRITAADAEVQTVKE  | Negative |
| P00730 | AADEAEVQTVKELEDLEHLQ | Negative |
| P00730 | HQVLRITAADAEVQTVKEL  | Negative |
| P00730 | VLLGAALGKEDFVGHQVLR  | Negative |
| P00730 | VLRTAADEAEVQTVKELED  | Negative |
| P00730 | ALGKEDFVGHQVLRITAAD  | Negative |
| P00730 | RTAADEAEVQTVKELEDLE  | Negative |
| P00730 | QVLRITAADAEVQTVKELE  | Negative |
| P00730 | LGKEDFVGHQVLRITAAD   | Negative |
| P00730 | KEDFVGHQVLRITAADAEV  | Negative |
| P00730 | GLLILSVLLGAALGKEDFVG | Negative |
| P00730 | LLGAALGKEDFVGHQVLRIT | Negative |
| P00730 | VGHQVLRITAADAEVQTVK  | Negative |
| P00730 | MQGLLILSVLLGAALGKEDF | Negative |
| P00730 | EDFVGHQVLRITAADAEVQ  | Negative |
| P00730 | GAALGKEDFVGHQVLRITAA | Negative |
| P00730 | AALGKEDFVGHQVLRITAAD | Negative |
| P00730 | LRITAADAEVQTVKELEDL  | Negative |
| P00730 | LSVLLGAALGKEDFVGHQVL | Negative |
| P00730 | FVGHQVLRITAADAEVQTV  | Negative |
| P00730 | LILSVLLGAALGKEDFVGHQ | Negative |
| P00730 | LLILSVLLGAALGKEDFVGH | Negative |
| P00730 | TAADEAEVQTVKELEDLEHL | Negative |
| P00733 | PVSAVAAPTATASASADVGA | Negative |
| P00733 | PRPIRLLLTALVGAGLAFAP | Negative |
| P00733 | PTATASASADVGDGCYTW   | Negative |
| P00733 | LLLTALVGAGLAFAPVSAVA | Negative |
| P00733 | RLLLTALVGAGLAFAPVSAV | Negative |
| P00733 | RPRPIRLLLTALVGAGLAFA | Negative |
| P00733 | FAPVSAVAAPTATASASADV | Negative |
| P00733 | AGLAFAPVSAVAAPTATASA | Negative |
| P00733 | AAPTATASASADVGDGCY   | Negative |

|        |                      |          |
|--------|----------------------|----------|
| P00733 | LLTALVGAGLAFAPVSAVAA | Negative |
| P00733 | APVSAVAAPTATASASADV  | Negative |
| P00733 | VGAGLAFAPVSAVAAPTATA | Negative |
| P00733 | VSAVAAPTATASASADV    | Negative |
| P00733 | TALVGAGLAFAPVSAVAAPT | Negative |
| P00733 | LAFAPVSAVAAPTATASASA | Negative |
| P00733 | RPIRLLLTALVGAGLAFAPV | Negative |
| P00733 | PIRLLLTALVGAGLAFAPVS | Negative |
| P00733 | AVAAAPTATASASADV     | Negative |
| P00733 | MRPRPIRLLLTALVGAGLAF | Negative |
| P00733 | IRLLLTALVGAGLAFAPVSA | Negative |
| P00733 | ALVGAGLAFAPVSAVAAPTA | Negative |
| P00733 | TATASASADV           | Negative |
| P00733 | AFAPVSAVAAPTATASASAD | Negative |
| P00733 | SAVAAPTATASASADV     | Negative |
| P00733 | GLAFAPVSAVAAPTATASAS | Negative |
| P00733 | LTALVGAGLAFAPVSAVAAP | Negative |
| P00733 | GAGLAFAPVSAVAAPTATAS | Negative |
| P00733 | VAAAPTATASASADV      | Negative |
| P00733 | LVGAGLAFAPVSAVAAPTAT | Negative |
| P00736 | AGGSIPIPKLFG         | Negative |
| P00736 | SIPIPKLFG            | Negative |
| P00736 | GEVTSPLFPKPYPNNFETTT | Negative |
| P00736 | RAGGSIPIPKLFG        | Negative |
| P00736 | LVPALFCRAGGSIPIPKL   | Negative |
| P00736 | ALFCRAGGSIPIPKLFG    | Negative |
| P00736 | IPIPKLFG             | Negative |
| P00736 | QKLFG                | Negative |
| P00736 | IPKLFG               | Negative |
| P00736 | LFCRAGGSIPIPKLFG     | Negative |
| P00736 | LYLLVPALFCRAGGSIPIQ  | Negative |
| P00736 | CRAGGSIPIPKLFG       | Negative |
| P00736 | LLVPALFCRAGGSIPIQKL  | Negative |
| P00736 | GGSIPIPKLFG          | Negative |
| P00736 | PALFCRAGGSIPIPKLFG   | Negative |
| P00736 | FCRAGGSIPIPKLFG      | Negative |
| P00736 | KLFG                 | Negative |
| P00736 | WLLYLLVPALFCRAGGSIPI | Negative |
| P00736 | PIPKLFG              | Negative |
| P00736 | GSIPIPKLFG           | Negative |
| P00736 | LF                   | Negative |
| P00736 | VPALFCRAGGSIPIPKLFG  | Negative |
| P00736 | EVTSPLFPKPYPNNFETTTV | Negative |
| P00736 | TSPLFPKPYPNNFETTTVIT | Negative |
| P00736 | MWLLYLLVPALFCRAGGSIP | Negative |
| P00736 | PQKLFG               | Negative |

|        |                       |          |
|--------|-----------------------|----------|
| P00736 | YLLVPALFCRAGGSIPIQK   | Negative |
| P00736 | FGEVTSPLFPKPYPNNFETT  | Negative |
| P00736 | VTSPFLFPKPYPNNFETTTVI | Negative |
| P00738 | DSGNDVTDIADDGCPKPPEI  | Negative |
| P00738 | ALLLWGQLFAVDSGNDVTDI  | Negative |
| P00738 | VIALLLWGQLFAVDSGNDVT  | Negative |
| P00738 | IALLWGQLFAVDSGNDVTD   | Negative |
| P00738 | TDIADDGCPKPPEIAHGYVE  | Negative |
| P00738 | DVTDIADDGCPKPPEIAHGY  | Negative |
| P00738 | DDGCPKPPEIAHGYVEHSVR  | Negative |
| P00738 | MSALGAVIALLLWGQLFAVD  | Negative |
| P00738 | IADDGCPKPPEIAHGYVEHS  | Negative |
| P00738 | LFAVDSGNDVTDIADDGCPK  | Negative |
| P00738 | FAVDSGNDVTDIADDGCPKP  | Negative |
| P00738 | WGQLFAVDSGNDVTDIADDG  | Negative |
| P00738 | LLWGQLFAVDSGNDVTDIA   | Negative |
| P00738 | DIADDGCPKPPEIAHGYVEH  | Negative |
| P00738 | LWGQLFAVDSGNDVTDIADD  | Negative |
| P00738 | NDVTDIADDGCPKPPEIAHG  | Negative |
| P00738 | GAVIALLLWGQLFAVDSGND  | Negative |
| P00738 | GNDVTDIADDGCPKPPEIAH  | Negative |
| P00738 | ALGAVIALLLWGQLFAVDSG  | Negative |
| P00738 | LLWGQLFAVDSGNDVTDIAD  | Negative |
| P00738 | AVIALLLWGQLFAVDSGNDV  | Negative |
| P00738 | GQLFAVDSGNDVTDIADDGC  | Negative |
| P00738 | QLFAVDSGNDVTDIADDGCP  | Negative |
| P00738 | SGNDVTDIADDGCPKPPEIA  | Negative |
| P00738 | ADDGCPKPPEIAHGYVEHSV  | Negative |
| P00738 | VTDIADDGCPKPPEIAHGYV  | Negative |
| P00738 | VDSGNDVTDIADDGCPKPPE  | Negative |
| P00738 | SALGAVIALLLWGQLFAVDS  | Negative |
| P00738 | AVDSGNDVTDIADDGCPKPP  | Negative |
| P00739 | NDVTDISDDRFPKPPEIANG  | Negative |
| P00739 | LYSGNDVTDISDDRFPKPPE  | Negative |
| P00739 | ALYSGNDVTDISDDRFPKPP  | Negative |
| P00739 | YSGNDVTDISDDRFPKPPEI  | Negative |
| P00739 | FALYSGNDVTDISDDRFPKP  | Negative |
| P00739 | ISLLWGRQLFALYSGNDVT   | Negative |
| P00739 | GAVISLLWGRQLFALYSGN   | Negative |
| P00739 | LLWGRQLFALYSGNDVTDIS  | Negative |
| P00739 | SGNDVTDISDDRFPKPPEIA  | Negative |
| P00739 | LLWGRQLFALYSGNDVTDI   | Negative |
| P00739 | TDISDDRFPKPPEIANGYVE  | Negative |
| P00739 | LWGRQLFALYSGNDVTDISD  | Negative |
| P00739 | DISDDRFPKPPEIANGYVEH  | Negative |
| P00739 | SDLGAVISLLWGRQLFALY   | Negative |

|        |                      |          |
|--------|----------------------|----------|
| P00739 | WGRQLFALYSGNDVTDISDD | Negative |
| P00739 | VISLLLWGRQLFALYSGNDV | Negative |
| P00739 | LFALYSGNDVTDISDDRFPK | Negative |
| P00739 | SDDRFPKPPEIANGYVEHLF | Negative |
| P00739 | DLGAVISLLLWGRQLFALYS | Negative |
| P00739 | QLFALYSGNDVTDISDDRFP | Negative |
| P00739 | GRQLFALYSGNDVTDISDDR | Negative |
| P00739 | RQLFALYSGNDVTDISDDR  | Negative |
| P00739 | VTDISDDRFPKPPEIANGYV | Negative |
| P00739 | ISDDRFPKPPEIANGYVEHL | Negative |
| P00739 | SLLLWGRQLFALYSGNDVTD | Negative |
| P00739 | DVTDISDDRFPKPPEIANGY | Negative |
| P00739 | AVISLLLWGRQLFALYSGND | Negative |
| P00739 | MSDLGAVISLLLWGRQLFAL | Negative |
| P00739 | GNDVTDISDDRFPKPPEIAN | Negative |
| P00747 | GASLFSVTKKQLGAGSIEEC | Negative |
| P00747 | MEHKEVVLLLLLFLKSGQGE | Negative |
| P00747 | LFLKSGQGEPLDDYVNTQGA | Negative |
| P00747 | FLKSGQGEPLDDYVNTQGAS | Negative |
| P00747 | KEVVLLLLLFLKSGQGEPLD | Negative |
| P00747 | LLLLFLKSGQGEPLDDYVNT | Negative |
| P00747 | LKSGQGEPLDDYVNTQGASL | Negative |
| P00747 | SGQGEPLDDYVNTQGASLFS | Negative |
| P00747 | VNTQGASLFSVTKKQLGAGS | Negative |
| P00747 | HKEVVLLLLLFLKSGQGEPL | Negative |
| P00747 | KSGQGEPLDDYVNTQGASLF | Negative |
| P00747 | VVLLLLLFLKSGQGEPLDDY | Negative |
| P00747 | LDDYVNTQGASLFSVTKKQL | Negative |
| P00747 | TQGASLFSVTKKQLGAGSIE | Negative |
| P00747 | QGASLFSVTKKQLGAGSIEE | Negative |
| P00747 | EPLDDYVNTQGASLFSVTKK | Negative |
| P00747 | NTQGASLFSVTKKQLGAGSI | Negative |
| P00747 | DYVNTQGASLFSVTKKQLGA | Negative |
| P00747 | PLDDYVNTQGASLFSVTKKQ | Negative |
| P00747 | DDYVNTQGASLFSVTKKQLG | Negative |
| P00747 | LLLFLKSGQGEPLDDYVNTQ | Negative |
| P00747 | VLLLLLFLKSGQGEPLDDYV | Negative |
| P00747 | GQGEPLDDYVNTQGASLFSV | Negative |
| P00747 | GEPLDDYVNTQGASLFSVTK | Negative |
| P00747 | LLLLLFLKSGQGEPLDDYVN | Negative |
| P00747 | QGEPLDDYVNTQGASLFSVT | Negative |
| P00747 | LLFLKSGQGEPLDDYVNTQG | Negative |
| P00747 | YVNTQGASLFSVTKKQLGAG | Negative |
| P00747 | EHKEVVLLLLLFLKSGQGEP | Negative |
| P00748 | APKEHKYKAEHTVVLTVTG  | Negative |
| P00748 | LSIPPWEAPKEHKYKAEHT  | Negative |

|        |                        |          |
|--------|------------------------|----------|
| P00748 | IPPWEAPKEHKYKAEHDTV    | Negative |
| P00748 | ALLLLGFLLSLESTLSIPP    | Negative |
| P00748 | STLSIPPWEAPKEHKYKAE    | Negative |
| P00748 | SIPPWEAPKEHKYKAEHDTV   | Negative |
| P00748 | RALLLLGFLLSLESTLSIP    | Negative |
| P00748 | ESTLSIPPWEAPKEHKYKAE   | Negative |
| P00748 | SLESTLSIPPWEAPKEHKYK   | Negative |
| P00748 | FLLVSLESTLSIPPWEAPKE   | Negative |
| P00748 | LLGFLLSLESTLSIPPWEA    | Negative |
| P00748 | EAPKEHKYKAEHDTVLTVT    | Negative |
| P00748 | VSLESTLSIPPWEAPKEHKY   | Negative |
| P00748 | PPWEAPKEHKYKAEHDTV     | Negative |
| P00748 | PKEHKYKAEHDTVLTVTGE    | Negative |
| P00748 | EHKYKAEHDTVLTVTGEP     | Negative |
| P00748 | TLSTLSIPPWEAPKEHKYKAEH | Negative |
| P00748 | LLLLGFLLSLESTLSIPPW    | Negative |
| P00748 | LGFLLSLESTLSIPPWEAP    | Negative |
| P00748 | WEAPKEHKYKAEHDTVLTVT   | Negative |
| P00748 | GFLLSLESTLSIPPWEAPK    | Negative |
| P00748 | LLVSLESTLSIPPWEAPKEH   | Negative |
| P00748 | LVSLESTLSIPPWEAPKEHK   | Negative |
| P00748 | MRALLLLGFLLSLESTLSI    | Negative |
| P00748 | KYKAEHDTVLTVTGEPCHF    | Negative |
| P00748 | LESTLSIPPWEAPKEHKYKA   | Negative |
| P00748 | HKYKAEHDTVLTVTGEPCH    | Negative |
| P00748 | KEHKYKAEHDTVLTVTGEP    | Negative |
| P00748 | PWEAPKEHKYKAEHDTVLT    | Negative |
| P00749 | LHQVPSNCDCLNGGTCVSNK   | Negative |
| P00749 | ALLARLLLCVLLVSDSKGSN   | Negative |
| P00749 | HQVPSNCDCLNGGTCVSNKY   | Negative |
| P00749 | SNELHQVPSNCDCLNGGTCV   | Negative |
| P00749 | LLLCVLLVSDSKGSNELHQV   | Negative |
| P00749 | RLLLCVLLVSDSKGSNELHQ   | Negative |
| P00749 | VPSNCDCLNGGTCVSNKYFS   | Negative |
| P00749 | MRALLARLLLCVLLVSDSKG   | Negative |
| P00749 | SKGSNELHQVPSNCDCLNGG   | Negative |
| P00749 | VVSDSKGSNELHQVPSNCD    | Negative |
| P00749 | QVPSNCDCLNGGTCVSNKYF   | Negative |
| P00749 | ELHQVPSNCDCLNGGTCVSN   | Negative |
| P00749 | LLCVLLVSDSKGSNELHQVP   | Negative |
| P00749 | LCVLLVSDSKGSNELHQVPS   | Negative |
| P00749 | NELHQVPSNCDCLNGGTCVS   | Negative |
| P00749 | PSNCDCLNGGTCVSNKYFSN   | Negative |
| P00749 | LLARLLLCVLLVSDSKGSNE   | Negative |
| P00749 | SNCDCLNGGTCVSNKYFSNI   | Negative |
| P00749 | DSKGSNELHQVPSNCDCLNG   | Negative |

|        |                       |          |
|--------|-----------------------|----------|
| P00749 | LARLLLCVLVVSDSKGSNEL  | Negative |
| P00749 | NCDCLNGGTCVSNKYFSNIH  | Negative |
| P00749 | RALLARLLLCVLVVSDSKGS  | Negative |
| P00749 | VLVVSDSKGSNELHQVPSNC  | Negative |
| P00749 | LVVSDSKGSNELHQVPSNCD  | Negative |
| P00749 | VSDSKGSNELHQVPSNCDCL  | Negative |
| P00749 | SDSKGSNELHQVPSNCDCLN  | Negative |
| P00749 | CVLVVSDSKGSNELHQVPSN  | Negative |
| P00749 | GSNELHQVPSNCDCLNGGTC  | Negative |
| P00749 | KGSNELHQVPSNCDCLNGGT  | Negative |
| P00750 | LCGAVFVSPSQEIHARFRRG  | Negative |
| P00750 | GLCCVLLLCGAVFVSPSQEI  | Negative |
| P00750 | AMKRGLCCVLLLCGAVFVSP  | Negative |
| P00750 | MDAMKRGLCCVLLLCGAVFV  | Negative |
| P00750 | LLLCGAVFVSPSQEIHARFR  | Negative |
| P00750 | VSPSQEIHARFRRGARSYQV  | Negative |
| P00750 | FRRGARSYQVICRDEKTQMI  | Negative |
| P00750 | DAMKRGLCCVLLLCGAVFVS  | Negative |
| P00750 | CVLLLCGAVFVSPSQEIHAR  | Negative |
| P00750 | ARFRRGARSYQVICRDEKTQ  | Negative |
| P00750 | GAVFVSPSQEIHARFRRGAR  | Negative |
| P00750 | RGLCCVLLLCGAVFVSPSQE  | Negative |
| P00750 | PSQEIHARFRRGARSYQVIC  | Negative |
| P00750 | VFVSPSQEIHARFRRGARSY  | Negative |
| P00750 | KRGLCCVLLLCGAVFVSPSQ  | Negative |
| P00750 | FVSPSQEIHARFRRGARSYQ  | Negative |
| P00750 | MKRGLCCVLLLCGAVFVSPS  | Negative |
| P00750 | CGAVFVSPSQEIHARFRRGA  | Negative |
| P00750 | HARFRRGARSYQVICRDEKT  | Negative |
| P00750 | EIHARFRRGARSYQVICRDE  | Negative |
| P00750 | AVFVSPSQEIHARFRRGARS  | Negative |
| P00750 | CCVLLLCGAVFVSPSQEIHA  | Negative |
| P00750 | RFRRGARSYQVICRDEKTQM  | Negative |
| P00750 | LLCGAVFVSPSQEIHARFRR  | Negative |
| P00750 | SPSQEIHARFRRGARSYQVI  | Negative |
| P00750 | SQEIHARFRRGARSYQVICR  | Negative |
| P00750 | IHARFRRGARSYQVICRDEK  | Negative |
| P00750 | QEIHARFRRGARSYQVICRD  | Negative |
| P00750 | VLLLCGAVFVSPSQEIHARF  | Negative |
| P00751 | TTTPWSLARPPQGSCSLEGVE | Negative |
| P00751 | TTPWSLARPPQGSCSLEGVEI | Negative |
| P00751 | LCLMPFILGLLSGGVTTTPW  | Negative |
| P00751 | LLSGGVTTTPWSLARPPQSC  | Negative |
| P00751 | LSPQLCLMPFILGLLSGGVTT | Negative |
| P00751 | MGSNLSPQLCLMPFILGLLS  | Negative |
| P00751 | SPQLCLMPFILGLLSGGVTT  | Negative |

|        |                      |          |
|--------|----------------------|----------|
| P00751 | GSNLSPQLCLMPFILGLLSG | Negative |
| P00751 | NLSPQLCLMPFILGLLSGGV | Negative |
| P00751 | SGGVTTTPWSLARPQGSCSL | Negative |
| P00751 | QLCLMPFILGLLSGGVTTTP | Negative |
| P00751 | PFILGLLSGGVTTTPWSLAR | Negative |
| P00751 | SNLSPQLCLMPFILGLLSGG | Negative |
| P00751 | GGVTTTPWSLARPQGSCSLE | Negative |
| P00751 | PQLCLMPFILGLLSGGVTTT | Negative |
| P00751 | MPFILGLLSGGVTTTPWSLA | Negative |
| P00751 | WSLARPQGSCSLEGVEIKGG | Negative |
| P00751 | PWSLARPQGSCSLEGVEIKG | Negative |
| P00751 | LSGGVTTTPWSLARPQGSCS | Negative |
| P00751 | TPWSLARPQGSCSLEGVEIK | Negative |
| P00751 | ILGLLSGGVTTTPWSLARPQ | Negative |
| P00751 | LGLLSGGVTTTPWSLARPQG | Negative |
| P00751 | CLMPFILGLLSGGVTTTPWS | Negative |
| P00751 | LARPQGSCSLEGVEIKGGSF | Negative |
| P00751 | GLLSGGVTTTPWSLARPQGS | Negative |
| P00751 | FILGLLSGGVTTTPWSLARP | Negative |
| P00751 | GVTTTPWSLARPQGSCSLEG | Negative |
| P00751 | VTTTPWSLARPQGSCSLEGV | Negative |
| P00751 | SLARPQGSCSLEGVEIKGGS | Negative |
| P00757 | LALSLGGIDAAPPVQSQVDC | Negative |
| P00757 | GIDAAPPVQSQVDCENSQPW | Negative |
| P00757 | LFLALSLGGIDAAPPVQSQV | Negative |
| P00757 | QVDCENSQPWHVAVYRFNKY | Negative |
| P00757 | ENSQPWHVAVYRFNKYQCGG | Negative |
| P00757 | ALSLGGIDAAPPVQSQVDCE | Negative |
| P00757 | WFLILFLALSLGGIDAAPPV | Negative |
| P00757 | LGGIDAAPPVQSQVDCENSQ | Negative |
| P00757 | SQPWHVAVYRFNKYQCGGVL | Negative |
| P00757 | SLGGIDAAPPVQSQVDCENS | Negative |
| P00757 | AAPPVQSQVDCENSQPWHVA | Negative |
| P00757 | NSQPWHVAVYRFNKYQCGGV | Negative |
| P00757 | DAAPPVQSQVDCENSQPWHV | Negative |
| P00757 | PVQSQVDCENSQPWHVAVYR | Negative |
| P00757 | VQSQVDCENSQPWHVAVYRF | Negative |
| P00757 | VDCENSQPWHVAVYRFNKYQ | Negative |
| P00757 | MWFLILFLALSLGGIDAAPP | Negative |
| P00757 | GGIDAAPPVQSQVDCENSQP | Negative |
| P00757 | FLALSLGGIDAAPPVQSQVD | Negative |
| P00757 | LILFLALSLGGIDAAPPVQS | Negative |
| P00757 | IDAAPPVQSQVDCENSQPWH | Negative |
| P00757 | DCENSQPWHVAVYRFNKYQC | Negative |
| P00757 | LSLGGIDAAPPVQSQVDCEN | Negative |
| P00757 | QSQVDCENSQPWHVAVYRFN | Negative |

|        |                      |          |
|--------|----------------------|----------|
| P00757 | SQVDCENSQPWHVAVYRFNK | Negative |
| P00757 | ILFLALSLGGIDAAPPVQSQ | Negative |
| P00757 | APPVQSQVDCENSQPWHVAV | Negative |
| P00757 | CENSQPWHVAVYRFNKYQCG | Negative |
| P00757 | PPVQSQVDCENSQPWHVAVY | Negative |
| P00760 | AAVAFPVDDDDKIVGGYTCG | Negative |
| P00760 | GYTCGANTVPYQVSLNSGYH | Negative |
| P00760 | VAFPVDDDDKIVGGYTCGAN | Negative |
| P00760 | GGYTCGANTVPYQVSLNSGY | Negative |
| P00760 | LLGAAVAFPVDDDDKIVGGY | Negative |
| P00760 | LALLGAAVAFPVDDDDKIVG | Negative |
| P00760 | FPVDDDDKIVGGYTCGANTV | Negative |
| P00760 | DDKIVGGYTCGANTVPYQVS | Negative |
| P00760 | PVDDDDKIVGGYTCGANTVP | Negative |
| P00760 | CGANTVPYQVSLNSGYHFCG | Negative |
| P00760 | YTCGANTVPYQVSLNSGYHF | Negative |
| P00760 | ALLGAAVAFPVDDDDKIVGG | Negative |
| P00760 | DDDKIVGGYTCGANTVPYQV | Negative |
| P00760 | LGAAVAFPVDDDDKIVGGYT | Negative |
| P00760 | VDDDDKIVGGYTCGANTVPY | Negative |
| P00760 | IFLALLGAAVAFPVDDDDKI | Negative |
| P00760 | AVAFPVDDDDKIVGGYTCGA | Negative |
| P00760 | MKTFIFLALLGAAVAFPVDD | Negative |
| P00760 | FIFLALLGAAVAFPVDDDDK | Negative |
| P00760 | GAAVAFPVDDDDKIVGGYTC | Negative |
| P00760 | FLALLGAAVAFPVDDDDKIV | Negative |
| P00760 | DDDDKIVGGYTCGANTVPYQ | Negative |
| P00760 | IVGGYTCGANTVPYQVSLNS | Negative |
| P00760 | DKIVGGYTCGANTVPYQVSL | Negative |
| P00760 | TCGANTVPYQVSLNSGYHFC | Negative |
| P00760 | AFPVDDDDKIVGGYTCGANT | Negative |
| P00760 | KTFIFLALLGAAVAFPVDDD | Negative |
| P00760 | KIVGGYTCGANTVPYQVSLN | Negative |
| P00760 | VGGYTCGANTVPYQVSLNSG | Negative |
| P00773 | SLVLYGHSTQDFPETNARVV | Negative |
| P00773 | LVFASLVLYGHSTQDFPETN | Negative |
| P00773 | FASLVLYGHSTQDFPETNAR | Negative |
| P00773 | TNARVVGGAEARRNSWPSQI | Negative |
| P00773 | NARVVGGAEARRNSWPSQIS | Negative |
| P00773 | TQDFPETNARVVGGAEARRN | Negative |
| P00773 | GGAEARRNSWPSQISLQYLS | Negative |
| P00773 | ETNARVVGGAEARRNSWPSQ | Negative |
| P00773 | LVLYGHSTQDFPETNARVVG | Negative |
| P00773 | FLVFASLVLYGHSTQDFPET | Negative |
| P00773 | VLYGHSTQDFPETNARVVG  | Negative |
| P00773 | VVGGAEARRNSWPSQISLQY | Negative |



|        |                      |          |
|--------|----------------------|----------|
| P00773 | FPETNARVVGGAEARRNSWP | Negative |
| P00773 | ARVVGGAEARRNSWPSQISL | Negative |
| P00773 | MLRFLVFASLVLYGHSTQDF | Negative |
| P00773 | HSTQDFPETNARVVGGAEAR | Negative |
| P00773 | ASLVLYGHSTQDFPETNARV | Negative |
| P00773 | GHSTQDFPETNARVVGGAEA | Negative |
| P00773 | DFPETNARVVGGAEARRNSW | Negative |
| P00773 | VFASLVLYGHSTQDFPETNA | Negative |
| P00773 | YGHSTQDFPETNARVVGGAE | Negative |
| P00773 | RFLVFASLVLYGHSTQDFPE | Negative |
| P00773 | VGGAEARRNSWPSQISLQYL | Negative |
| P00773 | QDFPETNARVVGGAEARRNS | Negative |
| P00773 | PETNARVVGGAEARRNSWPS | Negative |
| P00773 | GAEARRNSWPSQISLQYLSG | Negative |
| P00773 | LYGHSTQDFPETNARVVGGA | Negative |
| P00773 | RVVGGAEARRNSWPSQISLQ | Negative |
| P00773 | STQDFPETNARVVGGAEARR | Negative |
| P00779 | FALLFALTFGTVNSVQAIAG | Negative |
| P00779 | ALLFALTFGTVNSVQAIAGP | Negative |
| P00779 | SVQAIAGPEWLLDRPSVNN  | Negative |
| P00779 | GPEWLLDRPSVNNSQLVVS  | Negative |
| P00779 | LSFGMFALLFALTFGTVNSV | Negative |
| P00779 | AGPEWLLDRPSVNNSQLVVS | Negative |
| P00779 | KNYLSFGMFALLFALTFGTV | Negative |
| P00779 | YLSFGMFALLFALTFGTVNS | Negative |
| P00779 | ALTFGTVNSVQAIAGPEWLL | Negative |
| P00779 | FALTFGTVNSVQAIAGPEWL | Negative |
| P00779 | VQAIAGPEWLLDRPSVNN   | Negative |
| P00779 | LTFGTVNSVQAIAGPEWLLD | Negative |
| P00779 | SFGMFALLFALTFGTVNSVQ | Negative |
| P00779 | MKNYLSFGMFALLFALTFGT | Negative |
| P00779 | VNSVQAIAGPEWLLDRPSVN | Negative |
| P00779 | FGTVNSVQAIAGPEWLLDRP | Negative |
| P00779 | GTVNSVQAIAGPEWLLDRPS | Negative |
| P00779 | MFALLFALTFGTVNSVQAI  | Negative |
| P00779 | NSVQAIAGPEWLLDRPSVNN | Negative |
| P00779 | TVNSVQAIAGPEWLLDRPSV | Negative |
| P00779 | LFALTFGTVNSVQAIAGPEW | Negative |
| P00779 | FGMFALLFALTFGTVNSVQA | Negative |
| P00779 | PEWLLDRPSVNNSQLVVSVA | Negative |
| P00779 | TFGTVNSVQAIAGPEWLLDR | Negative |
| P00779 | AIAGPEWLLDRPSVNNSQLV | Negative |
| P00779 | QAIAGPEWLLDRPSVNNSQL | Negative |
| P00779 | NYLSFGMFALLFALTFGTVN | Negative |
| P00779 | IAGPEWLLDRPSVNNSQLVV | Negative |
| P00779 | GMFALLFALTFGTVNSVQAI | Negative |

|        |                      |          |
|--------|----------------------|----------|
| P00794 | QGAEITRIPLYKGKSLRKAL | Negative |
| P00794 | RIPLYKGKSLRKALKEHGLL | Negative |
| P00794 | GKSLRKALKEHGLLEDFLQK | Negative |
| P00794 | FALSQGAETRIPLYKGKSL  | Negative |
| P00794 | LYKGKSLRKALKEHGLLEDF | Negative |
| P00794 | MRCLVVLLAVFALSQGAET  | Negative |
| P00794 | EITRIPLYKGKSLRKALKEH | Negative |
| P00794 | LRKALKEHGLLEDFLQKQY  | Negative |
| P00794 | YKGKSLRKALKEHGLLEDFL | Negative |
| P00794 | TRIPLYKGKSLRKALKEHGL | Negative |
| P00794 | ALSQGAETRIPLYKGKSLR  | Negative |
| P00794 | GAEITRIPLYKGKSLRKALK | Negative |
| P00794 | SQGAETRIPLYKGKSLRKA  | Negative |
| P00794 | LSQGAETRIPLYKGKSLRK  | Negative |
| P00794 | AEITRIPLYKGKSLRKALKE | Negative |
| P00794 | PLYKGKSLRKALKEHGLLED | Negative |
| P00794 | IPLYKGKSLRKALKEHGLLE | Negative |
| P00794 | SLRKALKEHGLLEDFLQKQQ | Negative |
| P00794 | AVFALSQGAETRIPLYKGK  | Negative |
| P00794 | LVVLLAVFALSQGAETRIIP | Negative |
| P00794 | KGKSLRKALKEHGLLEDFLQ | Negative |
| P00794 | KSLRKALKEHGLLEDFLQKQ | Negative |
| P00794 | VLLAVFALSQGAETRIPLY  | Negative |
| P00794 | CLVVLLAVFALSQGAETRI  | Negative |
| P00794 | LAVFALSQGAETRIPLYKG  | Negative |
| P00794 | VVLLAVFALSQGAETRIPL  | Negative |
| P00794 | VFALSQGAETRIPLYKGKS  | Negative |
| P00794 | LLAVFALSQGAETRIPLYK  | Negative |
| P00794 | ITRIPLYKGKSLRKALKEHG | Negative |
| P00797 | WGLLLLLWGSCFGLPTDTT  | Negative |
| P00797 | TFGLPTDTTTFKRIFLKRMP | Negative |
| P00797 | TFKRIFLKRMPSIRESLKER | Negative |
| P00797 | WGSCFGLPTDTTTFKRIFL  | Negative |
| P00797 | GWRRMPRWGLLLLLWGSCF  | Negative |
| P00797 | TTTFKRIFLKRMPSIRESLK | Negative |
| P00797 | TTFKRIFLKRMPSIRESLKE | Negative |
| P00797 | RMPRWGLLLLLWGSCFGLP  | Negative |
| P00797 | WRRMPRWGLLLLLWGSCFG  | Negative |
| P00797 | GSCTFGLPTDTTTFKRIFLK | Negative |
| P00797 | TDTTTFKRIFLKRMPSIRES | Negative |
| P00797 | PRWGLLLLLWGSCFGLPTD  | Negative |
| P00797 | LPTDTTTFKRIFLKRMPsir | Negative |
| P00797 | MPRWGLLLLLWGSCFGLPT  | Negative |
| P00797 | DGWRRMPRWGLLLLLWGSC  | Negative |
| P00797 | GLLLLLWGSCFGLPTDTTT  | Negative |
| P00797 | GLPTDTTTFKRIFLKRMPsi | Negative |

|        |                        |          |
|--------|------------------------|----------|
| P00797 | LLWGSCTFGLPTDTTTTFKRI  | Negative |
| P00797 | PTDTTTTFKRIFLKRMPISIRE | Negative |
| P00797 | MDGWRRMPRWGLLLLLWGSC   | Negative |
| P00797 | LWGSCTFGLPTDTTTTFKRIF  | Negative |
| P00797 | LLLLWGSCTFGLPTDTTTTFK  | Negative |
| P00797 | RRMPRWGLLLLLWGSCTFGL   | Negative |
| P00797 | LLLLLWGSCTFGLPTDTTTTF  | Negative |
| P00797 | LLWGSCTFGLPTDTTTTFKR   | Negative |
| P00797 | FGLPTDTTTTFKRIFLKRMP   | Negative |
| P00797 | CTFGLPTDTTTTFKRIFLKR   | Negative |
| P00797 | SCTFGLPTDTTTTFKRIFLKR  | Negative |
| P00797 | DTTTFKRIFLKRMPISIRESL  | Negative |
| P00805 | ATGGTIAGGGDSATKSNTYTV  | Negative |
| P00805 | SGAALALPNITILATGGTIA   | Negative |
| P00805 | PNITILATGGTIAGGGDSAT   | Negative |
| P00805 | VMGFSGAALALPNITILATG   | Negative |
| P00805 | NITILATGGTIAGGGDSATK   | Negative |
| P00805 | ALPNITILATGGTIAGGGDS   | Negative |
| P00805 | LATGGTIAGGGDSATKSNTY   | Negative |
| P00805 | AALVMGFSGAALALPNITIL   | Negative |
| P00805 | FKKTALAALVMGFSGAALAL   | Negative |
| P00805 | ALVMGFSGAALALPNITILA   | Negative |
| P00805 | LPNITILATGGTIAGGGDSA   | Negative |
| P00805 | GFSGAALALPNITILATGGT   | Negative |
| P00805 | TILATGGTIAGGGDSATKSN   | Negative |
| P00805 | MEFFKKTALAALVMGFSGAA   | Negative |
| P00805 | ILATGGTIAGGGDSATKSNTY  | Negative |
| P00805 | AALALPNITILATGGTIAGG   | Negative |
| P00805 | KTALAALVMGFSGAALALPN   | Negative |
| P00805 | FSGAALALPNITILATGGTI   | Negative |
| P00805 | KKTALAALVMGFSGAALALP   | Negative |
| P00805 | LALPNITILATGGTIAGGGD   | Negative |
| P00805 | GAALALPNITILATGGTIAG   | Negative |
| P00805 | ITILATGGTIAGGGDSATKS   | Negative |
| P00805 | LVMGFSGAALALPNITILAT   | Negative |
| P00805 | MGFSGAALALPNITILATGG   | Negative |
| P00805 | EFFKKTALAALVMGFSGAAL   | Negative |
| P00805 | FFKKTALAALVMGFSGAALA   | Negative |
| P00805 | TALAALVMGFSGAALALPNI   | Negative |
| P00805 | LAALVMGFSGAALALPNITI   | Negative |
| P00805 | ALALPNITILATGGTIAGGG   | Negative |
| P00811 | KTTLCALLITASCTFAAPQ    | Negative |
| P00811 | STFAAPQQINDIVHRTITPL   | Negative |
| P00811 | LITASCTFAAPQQINDIVH    | Negative |
| P00811 | APQQINDIVHRTITPLIEQQ   | Negative |
| P00811 | ALLITASCTFAAPQQINDI    | Negative |

|        |                      |          |
|--------|----------------------|----------|
| P00811 | CALLITASCSTFAAPQQIND | Negative |
| P00811 | TASCSTFAAPQQINDIVHRT | Negative |
| P00811 | LLITASCSTFAAPQQINDIV | Negative |
| P00811 | ITASCSTFAAPQQINDIVHR | Negative |
| P00811 | AAPQQINDIVHRTITPLIEQ | Negative |
| P00811 | NDIVHRTITPLIEQQKIPGM | Negative |
| P00811 | FKTTLCALLITASCSTFAAP | Negative |
| P00811 | RTITPLIEQQKIPGMAVAVI | Negative |
| P00811 | FAAPQQINDIVHRTITPLIE | Negative |
| P00811 | LCALLITASCSTFAAPQQIN | Negative |
| P00811 | PQQINDIVHRTITPLIEQQK | Negative |
| P00811 | MFKTTLCALLITASCSTFAA | Negative |
| P00811 | HRTITPLIEQQKIPGMAVAV | Negative |
| P00811 | INDIVHRTITPLIEQQKIPG | Negative |
| P00811 | DIVHRTITPLIEQQKIPGMA | Negative |
| P00811 | ASCSTFAAPQQINDIVHRTI | Negative |
| P00811 | CSTFAAPQQINDIVHRTITP | Negative |
| P00811 | TFAAPQQINDIVHRTITPLI | Negative |
| P00811 | VHRTITPLIEQQKIPGMAVA | Negative |
| P00811 | SCSTFAAPQQINDIVHRTIT | Negative |
| P00811 | QINDIVHRTITPLIEQQKIP | Negative |
| P00811 | IVHRTITPLIEQQKIPGMAV | Negative |
| P00811 | QQINDIVHRTITPLIEQQKI | Negative |
| P00811 | TTLCALLITASCSTFAAPQQ | Negative |
| P00987 | LLLLGLLTLCAELIPVSSR  | Negative |
| P00987 | RDCDKPPDKGNCGPVRRAFY | Negative |
| P00987 | LLGLLTLCAELIPVSSRQRH | Negative |
| P00987 | HRDCDKPPDKGNCGPVRRAF | Negative |
| P00987 | LLLLGLLTLCAELIPVSSRQ | Negative |
| P00987 | QRHRDCDKPPDKGNCGPVRR | Negative |
| P00987 | GLLTLCAELIPVSSRQRHRD | Negative |
| P00987 | IPVSSRQRHRDCDKPPDKGN | Negative |
| P00987 | RHRDCDKPPDKGNCGPVRA  | Negative |
| P00987 | MSSGGLLLLLGLLTLCAELI | Negative |
| P00987 | PVSSRQRHRDCDKPPDKGNC | Negative |
| P00987 | AELIPVSSRQRHRDCDKPPD | Negative |
| P00987 | LCAELIPVSSRQRHRDCDKP | Negative |
| P00987 | VSSRQRHRDCDKPPDKGNCG | Negative |
| P00987 | SSRQRHRDCDKPPDKGNCGP | Negative |
| P00987 | LIPVSSRQRHRDCDKPPDKG | Negative |
| P00987 | CAELIPVSSRQRHRDCDKPP | Negative |
| P00987 | GGLLLLLGLLTLCAELIPVS | Negative |
| P00987 | RQRHRDCDKPPDKGNCGPVR | Negative |
| P00987 | TLCAELIPVSSRQRHRDCDK | Negative |
| P00987 | LLTLCAELIPVSSRQRHRDC | Negative |
| P00987 | LTLCAELIPVSSRQRHRDCD | Negative |

|        |                       |          |
|--------|-----------------------|----------|
| P00987 | LLLGLLTLCAELIPVSSRQR  | Negative |
| P00987 | SSGLLLLLLGLLTLCAELIP  | Negative |
| P00987 | SRQRHRDCDKPPDKGNCGPV  | Negative |
| P00987 | DCDKPPDKGNCGPVRRAFYY  | Negative |
| P00987 | SGLLLLLLGLLTLCAELIPV  | Negative |
| P00987 | ELIPVSSRQRHRDCDKPPDK  | Negative |
| P00987 | GLLLLLGLLTLCAELIPVSS  | Negative |
| P00989 | LLLGLLTLCAELTPVSSRKR  | Negative |
| P00989 | HPDCDKPPDTKICQTVVRAF  | Negative |
| P00989 | SSRKRHPDCDKPPDTKICQT  | Negative |
| P00989 | PVSSRKRHPDCDKPPDTKIC  | Negative |
| P00989 | TPVSSRKRHPDCDKPPDTKI  | Negative |
| P00989 | MSSGLLLLLLGLLTLCAELT  | Negative |
| P00989 | SRKRHPDCDKPPDTKICQTV  | Negative |
| P00989 | VSSRKRHPDCDKPPDTKICQ  | Negative |
| P00989 | SSGLLLLLLGLLTLCAELTP  | Negative |
| P00989 | DCDKPPDTKICQTVVRAFYY  | Negative |
| P00989 | TLCAELTPVSSRKRHPDCDK  | Negative |
| P00989 | ELTPVSSRKRHPDCDKPPDT  | Negative |
| P00989 | GLLTLCAELTPVSSRKRHPD  | Negative |
| P00989 | RHPDCDKPPDTKICQTVVRA  | Negative |
| P00989 | LTPVSSRKRHPDCDKPPDTK  | Negative |
| P00989 | AELTPVSSRKRHPDCDKPPD  | Negative |
| P00989 | KRHPDCDKPPDTKICQTVVR  | Negative |
| P00989 | LLTLCAELTPVSSRKRHPDC  | Negative |
| P00989 | GLLLLLLGLLTLCAELTPVS  | Negative |
| P00989 | CAELTPVSSRKRHPDCDKPP  | Negative |
| P00989 | PDCDKPPDTKICQTVVRAFY  | Negative |
| P00989 | LCAELTPVSSRKRHPDCDKP  | Negative |
| P00989 | LLLLLGLLTLCAELTPVSSR  | Negative |
| P00989 | SGLLLLLLGLLTLCAELTPV  | Negative |
| P00989 | LLGLLTLCAELTPVSSRKRH  | Negative |
| P00989 | RKRHPDCDKPPDTKICQTVV  | Negative |
| P00989 | GLLLLLGLLTLCAELTPVSS  | Negative |
| P00989 | LTLCAELTPVSSRKRHPDCD  | Negative |
| P00989 | LLLGLLTLCAELTPVSSRK   | Negative |
| P00991 | LLLGLLTLWAEELTPVSGQD  | Negative |
| P00991 | LLLLLGLLTLWAEELTPVSGQ | Negative |
| P00991 | LLLGLLTLWAEELTPVSGQDH | Negative |
| P00991 | ELTPVSGQDHPKFCYLPADP  | Negative |
| P00991 | LLGLLTLWAEELTPVSGQDHP | Negative |
| P00991 | LTLWAEELTPVSGQDHPKFCY | Negative |
| P00991 | DHPKFCYLPADPGRCKAHIP  | Negative |
| P00991 | GLLTLWAEELTPVSGQDHPKF | Negative |
| P00991 | TLWAEELTPVSGQDHPKFCYL | Negative |
| P00991 | LTPVSGQDHPKFCYLPADPG  | Negative |

|        |                       |          |
|--------|-----------------------|----------|
| P00991 | FCYLPADPGRCKAHIPRFYY  | Negative |
| P00991 | PKFCYLPADPGRCKAHIPRF  | Negative |
| P00991 | LWAELTPVSGQDHPKFCYLP  | Negative |
| P00991 | SGGLLLLLLGLLTLWAELTPV | Negative |
| P00991 | VSGQDHPKFCYLPADPGRCK  | Negative |
| P00991 | LLTLWAELTPVSGQDHPKFC  | Negative |
| P00991 | MSSGGLLLLLLGLLTLWAELT | Negative |
| P00991 | HPKFCYLPADPGRCKAHIPR  | Negative |
| P00991 | PVSGQDHPKFCYLPADPGRC  | Negative |
| P00991 | SSGGLLLLLLGLLTLWAELTP | Negative |
| P00991 | SGQDHPKFCYLPADPGRCKA  | Negative |
| P00991 | KFCYLPADPGRCKAHIPRFY  | Negative |
| P00991 | GGLLLLLLGLLTLWAELTPVS | Negative |
| P00991 | TPVSGQDHPKFCYLPADPGR  | Negative |
| P00991 | WAELTPVSGQDHPKFCYLP   | Negative |
| P00991 | GLLLLLLGLLTLWAELTPVSG | Negative |
| P00991 | AELTPVSGQDHPKFCYLPAD  | Negative |
| P00991 | QDHPKFCYLPADPGRCKAHI  | Negative |
| P00991 | GQDHPKFCYLPADPGRCKAH  | Negative |
| P00992 | SSGGLLLLLLGLLTLWAELTP | Negative |
| P00992 | LWAELTPVSTRDRPKFCYLP  | Negative |
| P00992 | LLLLLGLLTLWAELTPVSTR  | Negative |
| P00992 | LLTLWAELTPVSTRDRPKFC  | Negative |
| P00992 | LTWAELTPVSTRDRPKFCY   | Negative |
| P00992 | RDRPKFCYLPADPGRCLAYM  | Negative |
| P00992 | KFCYLPADPGRCLAYMPSFY  | Negative |
| P00992 | VSTRDRPKFCYLPADPGRCL  | Negative |
| P00992 | LLGLLTLWAELTPVSTRDRP  | Negative |
| P00992 | LTPVSTRDRPKFCYLPADPG  | Negative |
| P00992 | MSSGGLLLLLLGLLTLWAELT | Negative |
| P00992 | RPKFCYLPADPGRCLAYMPS  | Negative |
| P00992 | PVSTRDRPKFCYLPADPGRC  | Negative |
| P00992 | DRPKFCYLPADPGRCLAYMP  | Negative |
| P00992 | TRDRPKFCYLPADPGRCLAY  | Negative |
| P00992 | AELTPVSTRDRPKFCYLPAD  | Negative |
| P00992 | TLWAELTPVSTRDRPKFCYL  | Negative |
| P00992 | FCYLPADPGRCLAYMPSFYY  | Negative |
| P00992 | LLLGLLTLWAELTPVSTRD   | Negative |
| P00992 | TPVSTRDRPKFCYLPADPGR  | Negative |
| P00992 | GLLLLLLGLLTLWAELTPVST | Negative |
| P00992 | LLGLLTLWAELTPVSTRDR   | Negative |
| P00992 | STRDRPKFCYLPADPGRCLA  | Negative |
| P00992 | GLLTLWAELTPVSTRDRPKF  | Negative |
| P00992 | ELTPVSTRDRPKFCYLPADP  | Negative |
| P00992 | PKFCYLPADPGRCLAYMPSF  | Negative |
| P00992 | SGGLLLLLLGLLTLWAELTPV | Negative |

|        |                      |          |
|--------|----------------------|----------|
| P00992 | WAELTPVSTRDRPKFCYLPA | Negative |
| P00992 | GGLLLLGLLTLWAELTPVS  | Negative |
| P00995 | DSLGREAKCYNELNGCTKIY | Negative |
| P00995 | SGNTGADSLGREAKCYNELN | Negative |
| P00995 | REAKCYNELNGCTKIYDPVC | Negative |
| P00995 | GADSLGREAKCYNELNGCTK | Negative |
| P00995 | MKVTGIFLLSALALLSLSGN | Negative |
| P00995 | IFLLSALALLSLSGNTGADS | Negative |
| P00995 | LGREAKCYNELNGCTKIYDP | Negative |
| P00995 | FLLSALALLSLSGNTGADSL | Negative |
| P00995 | LLSLSGNTGADSLGREAKCY | Negative |
| P00995 | LALLSLSGNTGADSLGREAK | Negative |
| P00995 | ALALLSLSGNTGADSLGREA | Negative |
| P00995 | TGADSLGREAKCYNELNGCT | Negative |
| P00995 | EAKCYNELNGCTKIYDPVCG | Negative |
| P00995 | LLSALALLSLSGNTGADSLG | Negative |
| P00995 | GNTGADSLGREAKCYNELNG | Negative |
| P00995 | SALALLSLSGNTGADSLGRE | Negative |
| P00995 | ALLSLSGNTGADSLGREAKC | Negative |
| P00995 | NTGADSLGREAKCYNELNGC | Negative |
| P00995 | ADSLGREAKCYNELNGCTKI | Negative |
| P00995 | SLGREAKCYNELNGCTKIYD | Negative |
| P00995 | GIFLLSALALLSLSGNTGAD | Negative |
| P00995 | LSLSGNTGADSLGREAKCYN | Negative |
| P00995 | SLSGNTGADSLGREAKCYNE | Negative |
| P00995 | TGIFLLSALALLSLSGNTGA | Negative |
| P00995 | KVTGIFLLSALALLSLSGNT | Negative |
| P00995 | GREAKCYNELNGCTKIYDPV | Negative |
| P00995 | VTGIFLLSALALLSLSGNTG | Negative |
| P00995 | LSGNTGADSLGREAKCYNEL | Negative |
| P00995 | AKCYNELNGCTKIYDPVCGT | Negative |
| P00996 | ALVLMSLSGNSGANILGREA | Negative |
| P00996 | LLTALVLMSLSGNSGANILG | Negative |
| P00996 | IFLLTALVLMSLSGNSGANI | Negative |
| P00996 | SGANILGREAKCTNEVNGCP | Negative |
| P00996 | LVLMSLSGNSGANILGREAK | Negative |
| P00996 | MKVASIFLLTALVLMSLSGN | Negative |
| P00996 | NILGREAKCTNEVNGCPRIY | Negative |
| P00996 | MSLSGNSGANILGREAKCTN | Negative |
| P00996 | NSGANILGREAKCTNEVNGC | Negative |
| P00996 | ANILGREAKCTNEVNGCPRI | Negative |
| P00996 | GNSGANILGREAKCTNEVNG | Negative |
| P00996 | LSGNSGANILGREAKCTNEV | Negative |
| P00996 | REAKCTNEVNGCPRIYNPVC | Negative |
| P00996 | ILGREAKCTNEVNGCPRIYN | Negative |
| P00996 | VLMSLSGNSGANILGREAKC | Negative |

|        |                       |          |
|--------|-----------------------|----------|
| P00996 | AKCTNEVNGCPRIYNPVC GT | Negative |
| P00996 | KVASIFLLTALVLM SLSGNS | Negative |
| P00996 | SGNSGANILGREAKCTNEVN  | Negative |
| P00996 | EAKCTNEVNGCPRIYNPVC G | Negative |
| P00996 | SLSGNSGANILGREAKCTNE  | Negative |
| P00996 | GANILGREAKCTNEVNGCPR  | Negative |
| P00996 | LMSLSGNSGANILGREAKCT  | Negative |
| P00996 | SIFLLTALVLM SLSGNSGAN | Negative |
| P00996 | LGREAKCTNEVNGCPRIYNP  | Negative |
| P00996 | ASIFLLTALVLM SLSGNSGA | Negative |
| P00996 | VASIFLLTALVLM SLSGNSG | Negative |
| P00996 | GREAKCTNEVNGCPRIYNPV  | Negative |
| P00996 | TALVLM SLSGNSGANILGRE | Negative |
| P00996 | FLLTALVLM SLSGNSGANIL | Negative |
| P01001 | ALFCFFSGVFGQGAQVDCAE  | Negative |
| P01001 | FLLLSLALFCFFSGVFGQGA  | Negative |
| P01001 | GVFGQGAQVDCAEFKDPKVY  | Negative |
| P01001 | QGAQVDCAEFKDPKVYCTRE  | Negative |
| P01001 | FGQGAQVDCAEFKDPKVYCT  | Negative |
| P01001 | SLALFCFFSGVFGQGAQVDC  | Negative |
| P01001 | VDCAEFKDPKVYCTRESNPH  | Negative |
| P01001 | AQVDCAEFKDPKVYCTRESN  | Negative |
| P01001 | FFSGVFGQGAQVDCAEFKDP  | Negative |
| P01001 | LALFCFFSGVFGQGAQVDCA  | Negative |
| P01001 | SGVFGQGAQVDCAEFKDPKV  | Negative |
| P01001 | GVFLLLSLALFCFFSGVFGQ  | Negative |
| P01001 | GAQVDCAEFKDPKVYCTRES  | Negative |
| P01001 | SGVFLLLSLALFCFFSGVFG  | Negative |
| P01001 | LSLALFCFFSGVFGQGAQVD  | Negative |
| P01001 | CAEFKDPKVYCTRESNPHCG  | Negative |
| P01001 | CFFSGVFGQGAQVDCAEFKD  | Negative |
| P01001 | QVDCAEFKDPKVYCTRESNP  | Negative |
| P01001 | KTSGVFLLLSLALFCFFSGV  | Negative |
| P01001 | DCAEFKDPKVYCTRESNPHC  | Negative |
| P01001 | VFGQGAQVDCAEFKDPKVYC  | Negative |
| P01001 | GQGAQVDCAEFKDPKVYCTR  | Negative |
| P01001 | FCFFSGVFGQGAQVDCAEFK  | Negative |
| P01001 | LFCFFSGVFGQGAQVDCAEF  | Negative |
| P01001 | FSGVFGQGAQVDCAEFKDPK  | Negative |
| P01001 | LLLSLALFCFFSGVFGQGAQ  | Negative |
| P01001 | MKTSGVFLLLSLALFCFFSG  | Negative |
| P01001 | VFLLLSLALFCFFSGVFGQG  | Negative |
| P01001 | TSGVFLLLSLALFCFFSGVF  | Negative |
| P01005 | VFVLF SFVLCGFLPDAAFGA | Negative |
| P01005 | AAFGAEVDCSRFPNATDKEG  | Negative |
| P01005 | DAAFGAEVDCSRFPNATDKE  | Negative |



|        |                      |          |
|--------|----------------------|----------|
| P01005 | DCSRFPNATDKEGKDVLVCN | Negative |
| P01005 | MAGVFVLFVLCGFLPDAA   | Negative |
| P01005 | LCGFLPDAAFGAEVDCSRFP | Negative |
| P01005 | VLCGFLPDAAFGAEVDCSRF | Negative |
| P01005 | CGFLPDAAFGAEVDCSRFPN | Negative |
| P01005 | LPDAAFGAEVDCSRFPNATD | Negative |
| P01005 | AFGAEVDCSRFPNATDKEGK | Negative |
| P01005 | CSRFPNATDKEGKDVLVCNK | Negative |
| P01005 | VDCSRFPNATDKEGKDVLVC | Negative |
| P01005 | GAEVDCSRFPNATDKEGKDV | Negative |
| P01005 | PDAAFGAEVDCSRFPNATDK | Negative |
| P01005 | FVLCGFLPDAAFGAEVDCSR | Negative |
| P01005 | FLPDAAFGAEVDCSRFPNAT | Negative |
| P01005 | FGAEVDCSRFPNATDKEGKD | Negative |
| P01005 | AMAGVFVLFVLCGFLPDA   | Negative |
| P01005 | FVLFVLCGFLPDAAFGAE   | Negative |
| P01005 | LFSFVLCGFLPDAAFGAEVD | Negative |
| P01005 | AGVFVLFVLCGFLPDAAF   | Negative |
| P01005 | EVDCSRFPNATDKEGKDVLV | Negative |
| P01005 | VLFSFVLCGFLPDAAFGAEV | Negative |
| P01005 | SRFPNATDKEGKDVLVCNKD | Negative |
| P01005 | GFLPDAAFGAEVDCSRFPNA | Negative |
| P01005 | SFVLCGFLPDAAFGAEVDCS | Negative |
| P01005 | AEVDCSRFPNATDKEGKDVL | Negative |
| P01005 | MAMAGVFVLFVLCGFLPD   | Negative |
| P01005 | GVFVLFVLCGFLPDAAFG   | Negative |
| P01006 | PPPSAAPLSGAALAAPGDAP | Negative |
| P01006 | PSPSVSRPPPSAAPLSGAAL | Negative |
| P01006 | TGAGPSPSVSRPPPSAAPLS | Negative |
| P01006 | SRPPPSAAPLSGAALAAPGD | Negative |
| P01006 | SGAALAAPGDAPSALYAPSA | Negative |
| P01006 | AALAAPGDAPSALYAPSALV | Negative |
| P01006 | AAPGDAPSALYAPSALVLTV | Negative |
| P01006 | RNTGAGPSPSVSRPPPSAAP | Negative |
| P01006 | NTGAGPSPSVSRPPPSAAPL | Negative |
| P01006 | GPSPSVSRPPPSAAPLSGAA | Negative |
| P01006 | LSGAALAAPGDAPSALYAPS | Negative |
| P01006 | PGDAPSALYAPSALVLTVGK | Negative |
| P01006 | SAAPLSGAALAAPGDAPSAL | Negative |
| P01006 | PPSAAPLSGAALAAPGDAPS | Negative |
| P01006 | SPSVSRPPPSAAPLSGAALA | Negative |
| P01006 | VSRPPPSAAPLSGAALAAPG | Negative |
| P01006 | PLSGAALAAPGDAPSALYAP | Negative |
| P01006 | SVSRPPPSAAPLSGAALAAP | Negative |
| P01006 | APLSGAALAAPGDAPSALYA | Negative |
| P01006 | AGPSPSVSRPPPSAAPLSGA | Negative |

|        |                       |          |
|--------|-----------------------|----------|
| P01006 | APGDAPSALYAPSALVLTVG  | Negative |
| P01006 | AAPLSGAALAAPGDAPSALY  | Negative |
| P01006 | ALAAPGDAPSALYAPSALVL  | Negative |
| P01006 | RPPPSAAPLSGAALAAPGDA  | Negative |
| P01006 | MRNTGAGSPSPSVSRPPPSAA | Negative |
| P01006 | GAGSPSPSVSRPPPSAAPLSG | Negative |
| P01006 | GAALAAPGDAPSALYAPSAL  | Negative |
| P01006 | PSVSRPPPSAAPLSGAALAA  | Negative |
| P01006 | LAAPGDAPSALYAPSALVLT  | Negative |
| P01008 | YLLSLLLIGFWDCVTCHGSP  | Negative |
| P01008 | GTVTSGKRKVYLLSLLLIGF  | Negative |
| P01008 | LLIGFWDCVTCHGSPVDICT  | Negative |
| P01008 | VYLLSLLLIGFWDCVTCHGS  | Negative |
| P01008 | NVIGTVTSGKRKVYLLSLLL  | Negative |
| P01008 | VTSGKRKVYLLSLLLIGFWD  | Negative |
| P01008 | SNVIGTVTSGKRKVYLLSLL  | Negative |
| P01008 | IGFWDCVTCHGSPVDICTAK  | Negative |
| P01008 | RKVYLLSLLLIGFWDCVTCH  | Negative |
| P01008 | VIGTVTSGKRKVYLLSLLLI  | Negative |
| P01008 | SGKRKVYLLSLLLIGFWDCV  | Negative |
| P01008 | SLLLIGFWDCVTCHGSPVDI  | Negative |
| P01008 | TVTSGKRKVYLLSLLLIGFW  | Negative |
| P01008 | CVTCHGSPVDICTAKPRDIP  | Negative |
| P01008 | DCVTCHGSPVDICTAKPRDI  | Negative |
| P01008 | GKRKVYLLSLLLIGFWDCVT  | Negative |
| P01008 | WDCVTCHGSPVDICTAKPRD  | Negative |
| P01008 | LLIGFWDCVTCHGSPVDIC   | Negative |
| P01008 | GFWDCTCHGSPVDICTAKP   | Negative |
| P01008 | YSNVIGTVTSGKRKVYLLSL  | Negative |
| P01008 | MYSNVIGTVTSGKRKVYLLS  | Negative |
| P01008 | KVYLLSLLLIGFWDCVTCHG  | Negative |
| P01008 | KRKVYLLSLLLIGFWDCVTC  | Negative |
| P01008 | LSLLLIGFWDCVTCHGSPVD  | Negative |
| P01008 | TSGKRKVYLLSLLLIGFWDC  | Negative |
| P01008 | FWDCVTCHGSPVDICTAKPR  | Negative |
| P01008 | IGTVTSGKRKVYLLSLLLIG  | Negative |
| P01008 | VTCHGSPVDICTAKPRDIPM  | Negative |
| P01008 | LIGFWDCVTCHGSPVDICTA  | Negative |
| P01009 | AEDPQGDAQAQKTDTSHHQD  | Negative |
| P01009 | QGDAQAQKTDTSHHQDHPHF  | Negative |
| P01009 | LCCLVPVSLAEDPQGDAQK   | Negative |
| P01009 | PQGDAQAQKTDTSHHQDHPH  | Negative |
| P01009 | LAGLCCCLVPVSLAEDPQGDA | Negative |
| P01009 | VSLAEDPQGDAQAQKTDTSHH | Negative |
| P01009 | DAAQKTDTSHHQDHPHFNK   | Negative |
| P01009 | DPQGDAQAQKTDTSHHQDHP  | Negative |

|        |                      |          |
|--------|----------------------|----------|
| P01009 | SWGILLLAGLCCLVPVSLAE | Negative |
| P01009 | GDAAQKTDTSHHDQDHPTFN | Negative |
| P01009 | GLCCLVPVSLAEDPQGDAAQ | Negative |
| P01009 | VPVSLAEDPQGDAAQKTDTS | Negative |
| P01009 | CLVPVSLAEDPQGDAAQKTD | Negative |
| P01009 | ILLLAGLCCLVPVSLAEDPQ | Negative |
| P01009 | SVSWGILLLAGLCCLVPVSL | Negative |
| P01009 | LAEDPQGDAAQKTDTSHHDQ | Negative |
| P01009 | VSWGILLLAGLCCLVPVSLA | Negative |
| P01009 | SLAEDPQGDAAQKTDTSHHD | Negative |
| P01009 | WGILLLAGLCCLVPVSLAED | Negative |
| P01009 | SSVSWGILLLAGLCCLVPVS | Negative |
| P01009 | CCLVPVSLAEDPQGDAAQKT | Negative |
| P01009 | MPSSVSWGILLLAGLCCLVP | Negative |
| P01009 | PSSVSWGILLLAGLCCLVPV | Negative |
| P01009 | GILLLAGLCCLVPVSLAEDP | Negative |
| P01009 | AGLCCLVPVSLAEDPQGDA  | Negative |
| P01009 | EDPQGDAAQKTDTSHHDQDH | Negative |
| P01009 | LLAGLCCLVPVSLAEDPQGD | Negative |
| P01009 | PVSLAEDPQGDAAQKTDTS  | Negative |
| P01009 | LVPVSLAEDPQGDAAQKTD  | Negative |
| P01011 | LLAAGFCPAVLCHPNSPLDE | Negative |
| P01011 | LLALGLLAAGFCPAVLCHPN | Negative |
| P01011 | VLCHPNSPLDEENLTQENQD | Negative |
| P01011 | AAGFCPAVLCHPNSPLDEEN | Negative |
| P01011 | CPAVLCHPNSPLDEENLTQE | Negative |
| P01011 | ERMLPLLALGLLAAGFCPAV | Negative |
| P01011 | HPNSPLDEENLTQENQDRGT | Negative |
| P01011 | MLPLLALGLLAAGFCPAVLC | Negative |
| P01011 | CHPNSPLDEENLTQENQDRG | Negative |
| P01011 | AGFCPAVLCHPNSPLDEENL | Negative |
| P01011 | LCHPNSPLDEENLTQENQDR | Negative |
| P01011 | SPLDEENLTQENQDRGTHVD | Negative |
| P01011 | RMLPLLALGLLAAGFCPAVL | Negative |
| P01011 | DEENLTQENQDRGTHVDLGL | Negative |
| P01011 | LALGLLAAGFCPAVLCHPNS | Negative |
| P01011 | LGLLAAGFCPAVLCHPNSPL | Negative |
| P01011 | GLLAAGFCPAVLCHPNSPLD | Negative |
| P01011 | GFCPAVLCHPNSPLDEENLT | Negative |
| P01011 | LPLLALGLLAAGFCPAVLCH | Negative |
| P01011 | PAVLCHPNSPLDEENLTQEN | Negative |
| P01011 | PNSPLDEENLTQENQDRGTH | Negative |
| P01011 | LDEENLTQENQDRGTHVDLG | Negative |
| P01011 | LAAGFCPAVLCHPNSPLDEE | Negative |
| P01011 | MERMLPLLALGLLAAGFCPA | Negative |
| P01011 | FCPAVLCHPNSPLDEENLTQ | Negative |

|        |                       |          |
|--------|-----------------------|----------|
| P01011 | AVLCHPN SPLDEENLTQENQ | Negative |
| P01011 | NSPLDEENLTQENQDRGTHV  | Negative |
| P01011 | PLDEENLTQENQDRGTHVDL  | Negative |
| P01011 | PLLALGLLAAGFCPAVLCHP  | Negative |
| P01015 | ILTWVSLTAGDRVYIHPFHL  | Negative |
| P01015 | DRVYIHPFHLLYYSKSTCAQ  | Negative |
| P01015 | HPFHLLYYSKSTCAQLENPS  | Negative |
| P01015 | GAGLKATIFCILT WVSLTAG | Negative |
| P01015 | KATIFCILT WVSLTAGDRVY | Negative |
| P01015 | AGDRVYIHPFHLLYYSKSTC  | Negative |
| P01015 | TPTGAGLKATIFCILT WVSL | Negative |
| P01015 | LTAGDRVYIHPFHLLYYSKS  | Negative |
| P01015 | RVYIHPFHLLYYSKSTCAQL  | Negative |
| P01015 | GDRVYIHPFHLLYYSKSTCA  | Negative |
| P01015 | WVSLTAGDRVYIHPFHLLYY  | Negative |
| P01015 | TAGDRVYIHPFHLLYYSKST  | Negative |
| P01015 | GLKATIFCILT WVSLTAGDR | Negative |
| P01015 | TGAGLKATIFCILT WVSLTA | Negative |
| P01015 | LKATIFCILT WVSLTAGDRV | Negative |
| P01015 | IHPFHLLYYSKSTCAQLENP  | Negative |
| P01015 | CILT WVSLTAGDRVYIHPFH | Negative |
| P01015 | VSLTAGDRVYIHPFHLLYYS  | Negative |
| P01015 | FCILT WVSLTAGDRVYIHPF | Negative |
| P01015 | AGLKATIFCILT WVSLTAGD | Negative |
| P01015 | YIHPFHLLYYSKSTCAQLEN  | Negative |
| P01015 | PTGAGLKATIFCILT WVSLT | Negative |
| P01015 | SLTAGDRVYIHPFHLLYYSK  | Negative |
| P01015 | VYIHPFHLLYYSKSTCAQLE  | Negative |
| P01015 | LTWVSLTAGDRVYIHPFHLL  | Negative |
| P01015 | IFCILT WVSLTAGDRVYIHP | Negative |
| P01015 | TWVSLTAGDRVYIHPFHLLY  | Negative |
| P01015 | TIFCILT WVSLTAGDRVYIH | Negative |
| P01015 | MTPTGAGLKATIFCILT WVS | Negative |
| P01019 | LAWAGLAAGDRVYIHPFHLV  | Negative |
| P01019 | AGVSLRATILCLLAWAGLAA  | Negative |
| P01019 | KRAPQSEMAPAGVSLRATIL  | Negative |
| P01019 | LCLLAWAGLAAGDRVYIHPF  | Negative |
| P01019 | GLAAGDRVYIHPFHLVIHNE  | Negative |
| P01019 | APQSEMAPAGVSLRATILCL  | Negative |
| P01019 | RATILCLLAWAGLAAGDRVY  | Negative |
| P01019 | EMAPAGVSLRATILCLLAWA  | Negative |
| P01019 | APAGVSLRATILCLLAWAGL  | Negative |
| P01019 | SEMAPAGVSLRATILCLLAW  | Negative |
| P01019 | ILCLLAWAGLAAGDRVYIHP  | Negative |
| P01019 | RKRAPQSEMAPAGVSLRATI  | Negative |
| P01019 | LLAWAGLAAGDRVYIHPFHL  | Negative |

|        |                      |          |
|--------|----------------------|----------|
| P01019 | LRATILCLLAWAGLAAGDRV | Negative |
| P01019 | CLLAWAGLAAGDRVYIHPFH | Negative |
| P01019 | PQSEMAPAGVSLRATILCLL | Negative |
| P01019 | QSEMAPAGVSLRATILCLLA | Negative |
| P01019 | VSLRATILCLLAWAGLAAGD | Negative |
| P01019 | MRKRAPQSEMAPAGVSLRAT | Negative |
| P01019 | TILCLLAWAGLAAGDRVYIH | Negative |
| P01019 | RAPQSEMAPAGVSLRATILC | Negative |
| P01019 | SLRATILCLLAWAGLAAGDR | Negative |
| P01019 | WAGLAAGDRVYIHPFHLVIH | Negative |
| P01019 | MAPAGVSLRATILCLLAWAG | Negative |
| P01019 | PAGVSLRATILCLLAWAGLA | Negative |
| P01019 | AWAGLAAGDRVYIHPFHLVI | Negative |
| P01019 | GVSLRATILCLLAWAGLAAG | Negative |
| P01019 | AGLAAGDRVYIHPFHLVIHN | Negative |
| P01019 | LAAGDRVYIHPFHLVIHNES | Negative |
| P01023 | GKPQYMLVPSLLHTETTEK  | Negative |
| P01023 | ASVSGKPQYMLVPSLLHTE  | Negative |
| P01023 | LLHPSLVLLLLVLLPTDASV | Negative |
| P01023 | LPTDASVSGKPQYMLVPSL  | Negative |
| P01023 | MGKNKLLHPSLVLLLLVLLP | Negative |
| P01023 | LLLLVLLPTDASVSGKPQYM | Negative |
| P01023 | QYMLVPSLLHTETTEKGCV  | Negative |
| P01023 | GKNKLLHPSLVLLLLVLLPT | Negative |
| P01023 | LLVLLPTDASVSGKPQYMLV | Negative |
| P01023 | LVLLPTDASVSGKPQYMLV  | Negative |
| P01023 | PTDASVSGKPQYMLVPSLL  | Negative |
| P01023 | LVLLLLVLLPTDASVSGKPQ | Negative |
| P01023 | DASVSGKPQYMLVPSLLHT  | Negative |
| P01023 | PQYMLVPSLLHTETTEKGC  | Negative |
| P01023 | VLLPTDASVSGKPQYMLVP  | Negative |
| P01023 | HPSLVLLLLVLLPTDASVSG | Negative |
| P01023 | SLVLLLLVLLPTDASVSGKP | Negative |
| P01023 | TDASVSGKPQYMLVPSLLH  | Negative |
| P01023 | SVSGKPQYMLVPSLLHTET  | Negative |
| P01023 | SGKPQYMLVPSLLHTETTE  | Negative |
| P01023 | KLLHPSLVLLLLVLLPTDAS | Negative |
| P01023 | LHPSLVLLLLVLLPTDASVS | Negative |
| P01023 | LLLVLPTDASVSGKPQYMV  | Negative |
| P01023 | KPQYMLVPSLLHTETTEKG  | Negative |
| P01023 | VSGKPQYMLVPSLLHTETT  | Negative |
| P01023 | KNKLLHPSLVLLLLVLLPTD | Negative |
| P01023 | VLLLLVLLPTDASVSGKPQY | Negative |
| P01023 | LLPTDASVSGKPQYMLVPS  | Negative |
| P01023 | NKLLHPSLVLLLLVLLPTDA | Negative |
| P01024 | GPSLLLLLLTHLPLALGSPM | Negative |

|        |                      |          |
|--------|----------------------|----------|
| P01024 | GSPMYSIITPNILRLESEET | Negative |
| P01024 | LLLTHLPLALGSPMYSIITP | Negative |
| P01024 | LPLALGSPMYSIITPNILRL | Negative |
| P01024 | MYSIITPNILRLESEETMVL | Negative |
| P01024 | TPNILRLESEETMVLEAHDA | Negative |
| P01024 | PSLLLLLLTHLPLALGSPMY | Negative |
| P01024 | LLLLLLTHLPLALGSPMYSI | Negative |
| P01024 | PTSGPSLLLLLLTHLPLALG | Negative |
| P01024 | LGSPMYSIITPNILRLESEE | Negative |
| P01024 | LALGSPMYSIITPNILRLES | Negative |
| P01024 | SGPSLLLLLLTHLPLALGSP | Negative |
| P01024 | ALGSPMYSIITPNILRLESE | Negative |
| P01024 | YSIITPNILRLESEETMVLE | Negative |
| P01024 | PLALGSPMYSIITPNILRLE | Negative |
| P01024 | PMYSIITPNILRLESEETMV | Negative |
| P01024 | IITPNILRLESEETMVLEAH | Negative |
| P01024 | SIITPNILRLESEETMVLEA | Negative |
| P01024 | TSGPSLLLLLLTHLPLALGS | Negative |
| P01024 | LTHLPLALGSPMYSIITPNI | Negative |
| P01024 | GPTSGPSLLLLLLTHLPLAL | Negative |
| P01024 | MGPTSGPSLLLLLLTHLPLA | Negative |
| P01024 | SPMYSIITPNILRLESEETM | Negative |
| P01024 | THLPLALGSPMYSIITPNIL | Negative |
| P01024 | LLTHLPLALGSPMYSIITPN | Negative |
| P01024 | HLPLALGSPMYSIITPNILR | Negative |
| P01024 | LLLLTHLPLALGSPMYSIIT | Negative |
| P01024 | LLLLTHLPLALGSPMYSII  | Negative |
| P01024 | ITPNILRLESEETMVLEAHD | Negative |
| P01027 | GSQLLVLLLLLASSPLALGI | Negative |
| P01027 | PLALGIPMYSIITPNVLRLE | Negative |
| P01027 | LGIPMYSIITPNVLRLESEE | Negative |
| P01027 | YSIITPNVLRLESEETIVLE | Negative |
| P01027 | SSPLALGIPMYSIITPNVLR | Negative |
| P01027 | SQLLVLLLLLASSPLALGIP | Negative |
| P01027 | LLLLLASSPLALGIPMYSII | Negative |
| P01027 | IITPNVLRLESEETIVLEAH | Negative |
| P01027 | PMYSIITPNVLRLESEETIV | Negative |
| P01027 | LASSPLALGIPMYSIITPNV | Negative |
| P01027 | LLASSPLALGIPMYSIITPN | Negative |
| P01027 | LALGIPMYSIITPNVLRLES | Negative |
| P01027 | ASGSQLLVLLLLLASSPLAL | Negative |
| P01027 | VLLLLLASSPLALGIPMYSI | Negative |
| P01027 | MGPASGSQLLVLLLLLASSP | Negative |
| P01027 | QLLVLLLLLASSPLALGIPM | Negative |
| P01027 | ASSPLALGIPMYSIITPNVL | Negative |
| P01027 | GIPMYSIITPNVLRLESEET | Negative |

|        |                      |          |
|--------|----------------------|----------|
| P01027 | LLLLASSPLALGIPMYSIIT | Negative |
| P01027 | LLVLLLLLASSPLALGIPMY | Negative |
| P01027 | PASGSQLLVLLLLLASSPLA | Negative |
| P01027 | GPASGSQLLVLLLLLASSPL | Negative |
| P01027 | SGSQLLVLLLLLASSPLALG | Negative |
| P01027 | LLASSPLALGIPMYSIITP  | Negative |
| P01027 | MYSIITPNVLRLESEETIVL | Negative |
| P01027 | IPMYSIITPNVLRLESEETI | Negative |
| P01027 | SPLALGIPMYSIITPNVLR  | Negative |
| P01027 | SIITPNVLRLESEETIVLEA | Negative |
| P01027 | ALGIPMYSIITPNVLRLESE | Negative |
| P01033 | PLASGILLLLWLIAPSR    | Negative |
| P01033 | LIAPSRACTCVPPHPQTAFC | Negative |
| P01033 | ACTCVPPHPQTAFCNSDLVI | Negative |
| P01033 | ASGILLLLWLIAPSRACTCV | Negative |
| P01033 | IAPSRACTCVPPHPQTAFCN | Negative |
| P01033 | RACTCVPPHPQTAFCNSDLV | Negative |
| P01033 | PFEPLASGILLLLWLIAPSR | Negative |
| P01033 | PPHPQTAFCNSDLVIRAKFV | Negative |
| P01033 | APSRACTCVPPHPQTAFCNS | Negative |
| P01033 | LLWLIAPSRACTCVPPHPQT | Negative |
| P01033 | APFEPLASGILLLLWLIAPS | Negative |
| P01033 | EPLASGILLLLWLIAPSRAC | Negative |
| P01033 | TCVPPHPQTAFCNSDLVIRA | Negative |
| P01033 | LLLLWLIAPSRACTCVPPHP | Negative |
| P01033 | PSRACTCVPPHPQTAFCNSD | Negative |
| P01033 | WLIAPSRACTCVPPHPQTAF | Negative |
| P01033 | LLLWLIAPSRACTCVPPHPQ | Negative |
| P01033 | FEPLASGILLLLWLIAPSRA | Negative |
| P01033 | CVPPHPQTAFCNSDLVIRAK | Negative |
| P01033 | MAPFEPLASGILLLLWLIAP | Negative |
| P01033 | SRACTCVPPHPQTAFCNSDL | Negative |
| P01033 | HPQTAFCNSDLVIRAKFVGT | Negative |
| P01033 | CTCVPPHPQTAFCNSDLVIR | Negative |
| P01033 | LWLIAPSRACTCVPPHPQTA | Negative |
| P01033 | GILLLLWLIAPSRACTCVPP | Negative |
| P01033 | PHPQTAFCNSDLVIRAKFVG | Negative |
| P01033 | ILLLLWLIAPSRACTCVPPH | Negative |
| P01033 | VPPHPQTAFCNSDLVIRAKF | Negative |
| P01033 | LASGILLLLWLIAPSRACTC | Negative |
| P01034 | PLRAPLLLLAILAVALAVSP | Negative |
| P01034 | AAGSSPGKPPRLVGGPMDAS | Negative |
| P01034 | SPGKPPRLVGGPMDASVEEE | Negative |
| P01034 | LAVALAVSPAAGSSPGKPPR | Negative |
| P01034 | LLAILAVALAVSPAAGSSPG | Negative |
| P01034 | AILAVALAVSPAAGSSPGKP | Negative |

|        |                       |          |
|--------|-----------------------|----------|
| P01034 | ALAVSPAAGSSPGKPPRLVG  | Negative |
| P01034 | LRAPLLLLAILAVALAVSPA  | Negative |
| P01034 | MAGPLRAPLLLLAILAVALA  | Negative |
| P01034 | VSPAAGSSPGKPPRLVGGPM  | Negative |
| P01034 | AVALAVSPAAGSSPGKPPRL  | Negative |
| P01034 | VALAVSPAAGSSPGKPPRLV  | Negative |
| P01034 | ILAVALAVSPAAGSSPGKPP  | Negative |
| P01034 | APLLLLAILAVALAVSPAAG  | Negative |
| P01034 | AGPLRAPLLLLAILAVALAV  | Negative |
| P01034 | SSPGKPPRLVGGPMDASVEE  | Negative |
| P01034 | AGSSPGKPPRLVGGPMDASV  | Negative |
| P01034 | LLLLAILAVALAVSPAAGSS  | Negative |
| P01034 | GKPPRLVGGPMDASVEEEGV  | Negative |
| P01034 | GPLRAPLLLLAILAVALAVS  | Negative |
| P01034 | AVSPAAGSSPGKPPRLVGGP  | Negative |
| P01034 | RAPLLLLAILAVALAVSPAA  | Negative |
| P01034 | PLLLLLAILAVALAVSPAAGS | Negative |
| P01034 | PGKPPRLVGGPMDASVEEEG  | Negative |
| P01034 | LAVSPAAGSSPGKPPRLVGG  | Negative |
| P01034 | GSSPGKPPRLVGGPMDASVE  | Negative |
| P01034 | SPAAGSSPGKPPRLVGGPMD  | Negative |
| P01034 | PAAGSSPGKPPRLVGGPMDA  | Negative |
| P01034 | LLLAILAVALAVSPAAGSSP  | Negative |
| P01036 | LLLLMATLAGALASSSKEEN  | Negative |
| P01036 | AGALASSSKEENRIIPGGIY  | Negative |
| P01036 | SSSKEENRIIPGGIYDADLN  | Negative |
| P01036 | ALASSSKEENRIIPGGIYDA  | Negative |
| P01036 | NRIIPGGIYDADLNDEWVQR  | Negative |
| P01036 | EENRIIPGGIYDADLNDEWV  | Negative |
| P01036 | ENRIIPGGIYDADLNDEWVQ  | Negative |
| P01036 | TLLLLMATLAGALASSSKEE  | Negative |
| P01036 | LMATLAGALASSSKEENRII  | Negative |
| P01036 | GALASSSKEENRIIPGGIYD  | Negative |
| P01036 | KEENRIIPGGIYDADLNDEW  | Negative |
| P01036 | RIIPGGIYDADLNDEWVQRA  | Negative |
| P01036 | ARPLCTLLLLMATLAGALAS  | Negative |
| P01036 | MATLAGALASSSKEENRIIP  | Negative |
| P01036 | ASSSKEENRIIPGGIYDADL  | Negative |
| P01036 | SSKEENRIIPGGIYDADLND  | Negative |
| P01036 | ATLAGALASSSKEENRIIPG  | Negative |
| P01036 | LLMATLAGALASSSKEENR   | Negative |
| P01036 | RPLCTLLLLMATLAGALASS  | Negative |
| P01036 | PLCTLLLLMATLAGALASSS  | Negative |
| P01036 | LCTLLLLMATLAGALASSSK  | Negative |
| P01036 | IPGGIYDADLNDEWVQRALH  | Negative |
| P01036 | IIPGGIYDADLNDEWVQRAL  | Negative |



|        |                      |          |
|--------|----------------------|----------|
| P01036 | LAGALASSSKEENRIIPGGI | Negative |
| P01036 | LLMATLAGALASSSKEENRI | Negative |
| P01036 | MARPLCTLLLLMATLAGALA | Negative |
| P01036 | TLAGALASSSKEENRIIPGG | Negative |
| P01036 | SKEENRIIPGGIYDADLNDE | Negative |
| P01036 | LASSSKEENRIIPGGIYDAD | Negative |
| P01037 | WSPKEEDRIIPGGIYNADLN | Negative |
| P01037 | YLSTLLLLLATLAVALAWSP | Negative |
| P01037 | TLLLLLATLAVALAWSPKEE | Negative |
| P01037 | AQYLSTLLLLLATLAVALAW | Negative |
| P01037 | LLATLAVALAWSPKEEDRII | Negative |
| P01037 | EEDRIIPGGIYNADLNDEWV | Negative |
| P01037 | AWSPKEEDRIIPGGIYNADL | Negative |
| P01037 | RIIPGGIYNADLNDEWVQRA | Negative |
| P01037 | LLLLATLAVALAWSPKEEDR | Negative |
| P01037 | IIPGGIYNADLNDEWVQRAL | Negative |
| P01037 | PKEEDRIIPGGIYNADLNDE | Negative |
| P01037 | KEEDRIIPGGIYNADLNDEW | Negative |
| P01037 | ATLAVALAWSPKEEDRIIPG | Negative |
| P01037 | ALAWSPKEEDRIIPGGIYNA | Negative |
| P01037 | AVALAWSPKEEDRIIPGGIY | Negative |
| P01037 | DRIIPGGIYNADLNDEWVQR | Negative |
| P01037 | LLLATLAVALAWSPKEEDRI | Negative |
| P01037 | LATLAVALAWSPKEEDRIIP | Negative |
| P01037 | MAQYLSTLLLLLATLAVALA | Negative |
| P01037 | IPGGIYNADLNDEWVQRALH | Negative |
| P01037 | LAVALAWSPKEEDRIIPGGI | Negative |
| P01037 | LLLLLATLAVALAWSPKEED | Negative |
| P01037 | LAWSPKEEDRIIPGGIYNAD | Negative |
| P01037 | EDRIIPGGIYNADLNDEWVQ | Negative |
| P01037 | SPKEEDRIIPGGIYNADLND | Negative |
| P01037 | QYLSTLLLLLATLAVALAWS | Negative |
| P01037 | TLAVALAWSPKEEDRIIPGG | Negative |
| P01037 | LSTLLLLLATLAVALAWSPK | Negative |
| P01037 | VALAWSPKEEDRIIPGGIYN | Negative |
| P01038 | LLGAPVPVDENDEGLQRALQ | Negative |
| P01038 | VGAVLGSEDRSRLLGAPVPV | Negative |
| P01038 | VLGSEDRSRLLGAPVPVDEN | Negative |
| P01038 | RGCVVLLAAALMLVGAVLGS | Negative |
| P01038 | ARGCVVLLAAALMLVGAVLG | Negative |
| P01038 | GAVLGSEDRSRLLGAPVPVD | Negative |
| P01038 | LGSEDRSRLLGAPVPVDEND | Negative |
| P01038 | AALMLVGAVLGSEDRSRLLG | Negative |
| P01038 | GARGCVVLLAAALMLVGAVL | Negative |
| P01038 | MLVGAVLGSEDRSRLLGAPV | Negative |
| P01038 | SEDRSRLLGAPVPVDENDEG | Negative |

|        |                       |          |
|--------|-----------------------|----------|
| P01038 | AAALMLVGAVLGSEDRSRL   | Negative |
| P01038 | EDRSRLLGAPVPVDENDEGL  | Negative |
| P01038 | GSEDRSRLLGAPVPVDENDE  | Negative |
| P01038 | AVLGSEDRSRLLGAPVPVDE  | Negative |
| P01038 | ALMLVGAVLGSEDRSRLGA   | Negative |
| P01038 | AGARGCVVLLAAALMLVGAV  | Negative |
| P01038 | RLLGAPVPVDENDEGLQRAL  | Negative |
| P01038 | GCVVLLAAALMLVGAVLGSE  | Negative |
| P01038 | RSRLLGAPVPVDENDEGLQR  | Negative |
| P01038 | LVGAVLGSEDRSRLLGAPVP  | Negative |
| P01038 | VVLLAAALMLVGAVLGSEDR  | Negative |
| P01038 | LMLVGAVLGSEDRSRLLGAP  | Negative |
| P01038 | CVVLLAAALMLVGAVLGSED  | Negative |
| P01038 | DRSRLLGAPVPVDENDEGLQ  | Negative |
| P01038 | LAAALMLVGAVLGSEDRSRL  | Negative |
| P01038 | LLAAALMLVGAVLGSEDRSR  | Negative |
| P01038 | SRLLGAPVPVDENDEGLQRA  | Negative |
| P01038 | MAGARGCVVLLAAALMLVGA  | Negative |
| P01042 | SQSEEIDCNDKDLFKAVDAA  | Negative |
| P01042 | CSRLLSLTQESQSEEIDCN   | Negative |
| P01042 | SEEIDCNDKDLFKAVDAAALK | Negative |
| P01042 | ILFLCSRLLSLTQESQSEE   | Negative |
| P01042 | FLCSRLLSLTQESQSEEID   | Negative |
| P01042 | LCSRLLSLTQESQSEEIDC   | Negative |
| P01042 | DCNDKDLFKAVDAAALKKYN  | Negative |
| P01042 | SRLLSLTQESQSEEIDCND   | Negative |
| P01042 | LITILFLCSRLLSLTQESQ   | Negative |
| P01042 | TILFLCSRLLSLTQESQSE   | Negative |
| P01042 | KLITILFLCSRLLSLTQES   | Negative |
| P01042 | LFLCSRLLSLTQESQSEEI   | Negative |
| P01042 | LLSLTQESQSEEIDCNDKDL  | Negative |
| P01042 | MKLITILFLCSRLLSLTQE   | Negative |
| P01042 | LLSLTQESQSEEIDCNDKD   | Negative |
| P01042 | DKDLFKAVDAAALKKYNQ    | Negative |
| P01042 | QSEEIDCNDKDLFKAVDAA   | Negative |
| P01042 | CNDKDLFKAVDAAALKKYN   | Negative |
| P01042 | EIDCNDKDLFKAVDAAALKK  | Negative |
| P01042 | NDKDLFKAVDAAALKKYN    | Negative |
| P01042 | LSLTQESQSEEIDCNDKDLF  | Negative |
| P01042 | QESQSEEIDCNDKDLFKA    | Negative |
| P01042 | EEIDCNDKDLFKAVDAAALK  | Negative |
| P01042 | LTQESQSEEIDCNDKDLFKA  | Negative |
| P01042 | SLTQESQSEEIDCNDKDLF   | Negative |
| P01042 | RLLLSLTQESQSEEIDCNDK  | Negative |
| P01042 | ESQSEEIDCNDKDLFKA     | Negative |
| P01042 | IDCNDKDLFKAVDAAALKKYN | Negative |

|        |                       |          |
|--------|-----------------------|----------|
| P01042 | TQESQSEEIDCNDKDLFKAV  | Negative |
| P01045 | KLITILFLCSRLLPSTQES   | Negative |
| P01045 | PSLTQESSQEIDCNDQDVFK  | Negative |
| P01045 | CNDQDVFKAVDAALTKYNSE  | Negative |
| P01045 | LTQESSQEIDCNDQDVFKAV  | Negative |
| P01045 | FLCSRLLPSTQESSQEIDC   | Negative |
| P01045 | EIDCNDQDVFKAVDAALTKY  | Negative |
| P01045 | LLPSLTQESSQEIDCNDQDV  | Negative |
| P01045 | IDCNDQDVFKAVDAALTKYN  | Negative |
| P01045 | CSRLLPSTQESSQEIDCND   | Negative |
| P01045 | ILFLCSRLLPSTQESSQEI   | Negative |
| P01045 | LCSRLLPSTQESSQEIDCN   | Negative |
| P01045 | LPSLTQESSQEIDCNDQDVF  | Negative |
| P01045 | SQEIDCNDQDVFKAVDAALT  | Negative |
| P01045 | NDQDVFKAVDAALTKYNSEN  | Negative |
| P01045 | QESSQEIDCNDQDVFKAVDA  | Negative |
| P01045 | ESSQEIDCNDQDVFKAVDAA  | Negative |
| P01045 | DCNDQDVFKAVDAALTKYNS  | Negative |
| P01045 | TILFLCSRLLPSTQESSQE   | Negative |
| P01045 | LITILFLCSRLLPSTQESS   | Negative |
| P01045 | LFLCSRLLPSTQESSQEID   | Negative |
| P01045 | RLLPSLTQESSQEIDCNDQD  | Negative |
| P01045 | SSQEIDCNDQDVFKAVDAAL  | Negative |
| P01045 | DQDVFKAVDAALTKYNSENK  | Negative |
| P01045 | MKLITILFLCSRLLPSTQE   | Negative |
| P01045 | QEIDCNDQDVFKAVDAALTK  | Negative |
| P01045 | QDVFKAVDAALTKYNSENKS  | Negative |
| P01045 | TQESSQEIDCNDQDVFKAVD  | Negative |
| P01045 | SLTQESSQEIDCNDQDVFKA  | Negative |
| P01045 | SRLLPSTQESSQEIDCNDQ   | Negative |
| P01048 | LLPSLAQEEGAQELNCNDET  | Negative |
| P01048 | SLAQEEGAQELNCNDETVFQ  | Negative |
| P01048 | AQEEGAQELNCNDETVFQAV  | Negative |
| P01048 | MKLITILLCSRLLPSTLAQE  | Negative |
| P01048 | NCNDETVFQAVDTALKKYNA  | Negative |
| P01048 | LCSRLLPSTLAQEEGAQELNC | Negative |
| P01048 | EGAQELNCNDETVFQAVDTA  | Negative |
| P01048 | NDETVFQAVDTALKKYNAEL  | Negative |
| P01048 | QEEGAQELNCNDETVFQAVD  | Negative |
| P01048 | AQELNCNDETVFQAVDTALK  | Negative |
| P01048 | EEGAQELNCNDETVFQAVDT  | Negative |
| P01048 | LLCSRLLPSTLAQEEGAQELN | Negative |
| P01048 | LITILLCSRLLPSTLAQEEG  | Negative |
| P01048 | KLITILLCSRLLPSTLAQEE  | Negative |
| P01048 | ILLCSRLLPSTLAQEEGAQE  | Negative |
| P01048 | SRLLPSTLAQEEGAQELNCND | Negative |

|        |                      |          |
|--------|----------------------|----------|
| P01048 | DETVFQAVDTALKKYNAELE | Negative |
| P01048 | CNDETVFQAVDTALKKYNAE | Negative |
| P01048 | ELNCNDETVFQAVDTALKKY | Negative |
| P01048 | LNCNDETVFQAVDTALKKYN | Negative |
| P01048 | QELNCNDETVFQAVDTALKK | Negative |
| P01048 | PSLAQEEGAQELNCNDETVF | Negative |
| P01048 | LAQEEGAQELNCNDETVFQA | Negative |
| P01048 | GAQELNCNDETVFQAVDTAL | Negative |
| P01048 | CSRLLPSLAQEEGAQELNCN | Negative |
| P01048 | LPSLAQEEGAQELNCNDETV | Negative |
| P01048 | RLLPSLAQEEGAQELNCNDE | Negative |
| P01048 | LLCSRLLPSLAQEEGAQEL  | Negative |
| P01048 | TILLCSRLLPSLAQEEGAQ  | Negative |
| P01068 | LQTSSSDDEYKCYCADTYS  | Negative |
| P01068 | TLTACSECVCPQTSSSDDE  | Negative |
| P01068 | MNMLLLFLHEVINGERVTLT | Negative |
| P01068 | TACSECVCPQTSSSDDEYK  | Negative |
| P01068 | EVINGERVTLTACSECVCP  | Negative |
| P01068 | LTACSECVCPQTSSSDDEY  | Negative |
| P01068 | VCPLQTSSSDDEYKCYCADT | Negative |
| P01068 | ERVTLTACSECVCPQTSSS  | Negative |
| P01068 | LHEVINGERVTLTACSECV  | Negative |
| P01068 | CSECVCPQTSSSDDEYKCY  | Negative |
| P01068 | HEVINGERVTLTACSECVCP | Negative |
| P01068 | RVTLTACSECVCPQTSSSD  | Negative |
| P01068 | LFLHEVINGERVTLTACSEC | Negative |
| P01068 | FLHEVINGERVTLTACSECV | Negative |
| P01068 | LLLFLHEVINGERVTLTACS | Negative |
| P01068 | SECVCPQTSSSDDEYKCYC  | Negative |
| P01068 | NGERVTLTACSECVCPQTS  | Negative |
| P01068 | ACSECVCPQTSSSDDEYKC  | Negative |
| P01068 | VTLTACSECVCPQTSSSD   | Negative |
| P01068 | ECVCPQTSSSDDEYKCYCA  | Negative |
| P01068 | INGERVTLTACSECVCPQT  | Negative |
| P01068 | CVCPLQTSSSDDEYKCYCAD | Negative |
| P01068 | VINGERVTLTACSECVCPQ  | Negative |
| P01068 | PLQTSSSDDEYKCYCADTYS | Negative |
| P01068 | MLLLFLHEVINGERVTLTAC | Negative |
| P01068 | GERVTLTACSECVCPQTSS  | Negative |
| P01068 | NMLLLFLHEVINGERVTLTA | Negative |
| P01068 | QTSSSDDEYKCYCADTYS   | Negative |
| P01068 | CPLQTSSSDDEYKCYCADTY | Negative |
| P01070 | IFFLFLCAFTTSYLPSAIA  | Negative |
| P01070 | LFLCAFTTSYLPSAIA     | Negative |
| P01070 | LDNEGNPLENGGTYI      | Negative |
| P01070 | LPSAIA               | Negative |

|        |                      |          |
|--------|----------------------|----------|
| P01070 | TSYLPSAIADFVLDNEGNPL | Negative |
| P01070 | CAFTTSYLPSAIADFVLDNE | Negative |
| P01070 | YLPSAIADFVLDNEGNPLEN | Negative |
| P01070 | TIFFLFLFCAFTTSYLPSAI | Negative |
| P01070 | IADFVLDNEGNPLENGGTTY | Negative |
| P01070 | FLFCAFTTSYLPSAIADFVL | Negative |
| P01070 | FVLDNEGNPLENGGTTYILS | Negative |
| P01070 | AIADFVLDNEGNPLENGGTY | Negative |
| P01070 | SYLPSAIADFVLDNEGNPLE | Negative |
| P01070 | VLDNEGNPLENGGTTYILSD | Negative |
| P01070 | NEGNPLENGGTTYILSDITA | Negative |
| P01070 | AFTTSYLPSAIADFVLDNEG | Negative |
| P01070 | SAIADFVLDNEGNPLENGGT | Negative |
| P01070 | STIFFLFLFCAFTTSYLPSA | Negative |
| P01070 | DFVLDNEGNPLENGGTYIIL | Negative |
| P01070 | FFLFLFCAFTTSYLPSAIAD | Negative |
| P01070 | PSAIADFVLDNEGNPLENGG | Negative |
| P01070 | KSTIFFLFLFCAFTTSYLPS | Negative |
| P01070 | FCAFTTSYLPSAIADFVLDN | Negative |
| P01070 | ADFVLDNEGNPLENGGTYI  | Negative |
| P01070 | FTTSYLPSAIADFVLDNEGN | Negative |
| P01070 | MKSTIFFLFLFCAFTTSYLP | Negative |
| P01070 | TTSYLPSAIADFVLDNEGNP | Negative |
| P01070 | FLFLFCAFTTSYLPSAIADF | Negative |
| P01070 | DNEGNPLENGGTTYILSDIT | Negative |
| P01076 | ATLTKLFQQYDPVCHKPCST | Negative |
| P01076 | TLTKLFQQYDPVCHKPCSTQ | Negative |
| P01076 | LVVIAAQDVMAQDATLTKLF | Negative |
| P01076 | AAQDVMAQDATLTKLFQQYD | Negative |
| P01076 | FTILLVVIAAQDVMAQDATL | Negative |
| P01076 | KFTILFTILLVVIAAQDVMA | Negative |
| P01076 | FTILFTILLVVIAAQDVMAQ | Negative |
| P01076 | ILLVVIAAQDVMAQDATLTK | Negative |
| P01076 | MAQKFTILFTILLVVIAAQD | Negative |
| P01076 | LLVVIAAQDVMAQDATLTKL | Negative |
| P01076 | VMAQDATLTKLFQQYDPVCH | Negative |
| P01076 | QDATLTKLFQQYDPVCHKPC | Negative |
| P01076 | DATLTKLFQQYDPVCHKPCS | Negative |
| P01076 | DVMAQDATLTKLFQQYDPVC | Negative |
| P01076 | MAQDATLTKLFQQYDPVCHK | Negative |
| P01076 | AQKFTILFTILLVVIAAQDV | Negative |
| P01076 | ILFTILLVVIAAQDVMAQDA | Negative |
| P01076 | QKFTILFTILLVVIAAQDVM | Negative |
| P01076 | TKLFQQYDPVCHKPCSTQDD | Negative |
| P01076 | KLFQQYDPVCHKPCSTQDDC | Negative |
| P01076 | VIAAQDVMAQDATLTKLFQQ | Negative |

|        |                      |          |
|--------|----------------------|----------|
| P01076 | AQDATLTKLFQQYDPVCHKP | Negative |
| P01076 | QDVMAQDATLTKLFQQYDPV | Negative |
| P01076 | TILFTILLVVIAAQDVMAQD | Negative |
| P01076 | LFTILLVVIAAQDVMAQDAT | Negative |
| P01076 | TILLVVIAAQDVMAQDATLT | Negative |
| P01076 | LTKLFQQYDPVCHKPCSTQD | Negative |
| P01076 | VVIAAQDVMAQDATLTKLFQ | Negative |
| P01076 | IAAQDVMAQDATLTKLFQQY | Negative |
| P01077 | APAQAAPSCPAGSLCTYSGT | Negative |
| P01077 | LGAVGFTAPAQAAPSCPAGS | Negative |
| P01077 | LAGSALTLVLGAVGFTAPAQ | Negative |
| P01077 | AQAAPSCPAGSLCTYSGTGL | Negative |
| P01077 | PAQAAPSCPAGSLCTYSGTG | Negative |
| P01077 | GAVGFTAPAQAAPSCPAGSL | Negative |
| P01077 | TAPAQAAPSCPAGSLCTYSG | Negative |
| P01077 | QAAPSCPAGSLCTYSGTGLS | Negative |
| P01077 | AGSALTLVLGAVGFTAPAQA | Negative |
| P01077 | VLGAVGFTAPAQAAPSCPAG | Negative |
| P01077 | AVGFTAPAQAAPSCPAGSLC | Negative |
| P01077 | GLAGSALTLVLGAVGFTAPA | Negative |
| P01077 | RALGLAGSALTLVLGAVGFT | Negative |
| P01077 | LVLGAVGFTAPAQAAPSCPA | Negative |
| P01077 | KRALGLAGSALTLVLGAVGF | Negative |
| P01077 | SALTLVLGAVGFTAPAQAAP | Negative |
| P01077 | GFTAPAQAAPSCPAGSLCTY | Negative |
| P01077 | ALGLAGSALTLVLGAVGFTA | Negative |
| P01077 | APSCPAGSLCTYSGTGLSGA | Negative |
| P01077 | MVRKRALGLAGSALTLVLGA | Negative |
| P01077 | LTLVLGAVGFTAPAQAAPSC | Negative |
| P01077 | VRKRALGLAGSALTLVLGAV | Negative |
| P01077 | RKRALGLAGSALTLVLGAVG | Negative |
| P01077 | GSALTLVLGAVGFTAPAQAA | Negative |
| P01077 | VGFTAPAQAAPSCPAGSLCT | Negative |
| P01077 | AAPSCPAGSLCTYSGTGLSG | Negative |
| P01077 | LGLAGSALTLVLGAVGFTAP | Negative |
| P01077 | ALTLVLGAVGFTAPAQAAPS | Negative |
| P01077 | FTAPAQAAPSCPAGSLCTYS | Negative |
| P01083 | EYGARSHNSGPWSWCNPATG | Negative |
| P01083 | MLVATTMAVEYGARSHNSGP | Negative |
| P01083 | GLLVFMLVATTMAVEYGARS | Negative |
| P01083 | MWMKTVFWGLLVFMLVATTM | Negative |
| P01083 | TVFWGLLVFMLVATTMAVEY | Negative |
| P01083 | NSGPWSWCNPATGYKVSALT | Negative |
| P01083 | WMKTVFWGLLVFMLVATTMA | Negative |
| P01083 | ARSHNSGPWSWCNPATGYKV | Negative |
| P01083 | WGLLVFMLVATTMAVEYGAR | Negative |

|        |                      |          |
|--------|----------------------|----------|
| P01083 | ATTMAVEYGARSHNSGPWSW | Negative |
| P01083 | VEYGARSHNSGPWSWCNPAT | Negative |
| P01083 | LVATTMAVEYGARSHNSGPW | Negative |
| P01083 | VFWGLLVFMLVATTMAVEYG | Negative |
| P01083 | GARSHNSGPWSWCNPATGYK | Negative |
| P01083 | FWGLLVFMLVATTMAVEYGA | Negative |
| P01083 | MKTVFWGLLVFMLVATTMAV | Negative |
| P01083 | TTMAVEYGARSHNSGPWSWC | Negative |
| P01083 | KTVFWGLLVFMLVATTMAVE | Negative |
| P01083 | LLVFMLVATTMAVEYGARSH | Negative |
| P01083 | YGARSHNSGPWSWCNPATGY | Negative |
| P01083 | LVFMLVATTMAVEYGARSHN | Negative |
| P01083 | FMLVATTMAVEYGARSHNSG | Negative |
| P01083 | VFMLVATTMAVEYGARSHNS | Negative |
| P01083 | MAVEYGARSHNSGPWSWCNP | Negative |
| P01083 | AVEYGARSHNSGPWSWCNPA | Negative |
| P01083 | HNSGPWSWCNPATGYKVSAL | Negative |
| P01083 | TMAVEYGARSHNSGPWSWCN | Negative |
| P01083 | SHNSGPWSWCNPATGYKVSA | Negative |
| P01083 | RSHNSGPWSWCNPATGYKVS | Negative |
| P01086 | LVATATSFGDSCAPGDALPH | Negative |
| P01086 | YQLLLSAAVMLAILVATATS | Negative |
| P01086 | VATATSFGDSCAPGDALPHN | Negative |
| P01086 | GDSCAPGDALPHNPLRACRT | Negative |
| P01086 | MAFKYQLLLSAAVMLAILVA | Negative |
| P01086 | ATATSFGDSCAPGDALPHNP | Negative |
| P01086 | FGDSCAPGDALPHNPLRACR | Negative |
| P01086 | SFGDSCAPGDALPHNPLRAC | Negative |
| P01086 | AVMLAILVATATSFGDSCAP | Negative |
| P01086 | SCAPGDALPHNPLRACRTYV | Negative |
| P01086 | FKYQLLLSAAVMLAILVATA | Negative |
| P01086 | LSAAVMLAILVATATSFGDS | Negative |
| P01086 | DSCAPGDALPHNPLRACRTY | Negative |
| P01086 | AAVMLAILVATATSFGDSCA | Negative |
| P01086 | MLAILVATATSFGDSCAPGD | Negative |
| P01086 | ILVATATSFGDSCAPGDALP | Negative |
| P01086 | KYQLLLSAAVMLAILVATAT | Negative |
| P01086 | VMLAILVATATSFGDSCAPG | Negative |
| P01086 | LLSAAVMLAILVATATSFG  | Negative |
| P01086 | ATSFGDSCAPGDALPHNPLR | Negative |
| P01086 | TATSFGDSCAPGDALPHNPL | Negative |
| P01086 | LLSAAVMLAILVATATSFGD | Negative |
| P01086 | AILVATATSFGDSCAPGDAL | Negative |
| P01086 | TSFGDSCAPGDALPHNPLRA | Negative |
| P01086 | APGDALPHNPLRACRTYVVS | Negative |
| P01086 | LAILVATATSFGDSCAPGDA | Negative |

|        |                       |          |
|--------|-----------------------|----------|
| P01086 | AFKYQLLLSAAVMLAILVAT  | Negative |
| P01086 | CAPGDALPHNPLRACRTYVV  | Negative |
| P01086 | QLLLSAAVMLAILVATATSF  | Negative |
| P01088 | SAGTSCVPGWAIPHNPLPSC  | Negative |
| P01088 | SSSSSHRRLILAAAVLLSVL  | Negative |
| P01088 | SASAGTSCVPGWAIPHNPLP  | Negative |
| P01088 | SVLAAASASAGTSCVPGWAI  | Negative |
| P01088 | HRRILILAAAVLLSVLAAASA | Negative |
| P01088 | AASASAGTSCVPGWAIPHN   | Negative |
| P01088 | ASAGTSCVPGWAIPHNPLPS  | Negative |
| P01088 | ILAAAVLLSVLAAASASAGT  | Negative |
| P01088 | MASSSSSSHRRLILAAAVLL  | Negative |
| P01088 | VLLSVLAAASASAGTSCVPG  | Negative |
| P01088 | AVLLSVLAAASASAGTSCVP  | Negative |
| P01088 | AAASASAGTSCVPGWAIPHN  | Negative |
| P01088 | RRLILAAAVLLSVLAAASAS  | Negative |
| P01088 | ASSSSSSHRRLILAAAVLLS  | Negative |
| P01088 | AAVLLSVLAAASASAGTSCV  | Negative |
| P01088 | SSSHRRLILAAAVLLSVLAA  | Negative |
| P01088 | SSHRRLILAAAVLLSVLAAA  | Negative |
| P01088 | LAAASASAGTSCVPGWAIPH  | Negative |
| P01088 | AGTSCVPGWAIPHNPLPSCR  | Negative |
| P01088 | ASASAGTSCVPGWAIPHNPL  | Negative |
| P01088 | LLSVLAAASASAGTSCVPGW  | Negative |
| P01088 | LILAAAVLLSVLAAASASAG  | Negative |
| P01088 | SSSSHRRLILAAAVLLSVLA  | Negative |
| P01088 | LSVLAAASASAGTSCVPGWA  | Negative |
| P01088 | VLAAASASAGTSCVPGWAIP  | Negative |
| P01088 | AAAVLLSVLAAASASAGTSC  | Negative |
| P01088 | RLILAAAVLLSVLAAASASA  | Negative |
| P01088 | SSSSSSHRRLILAAAVLLSV  | Negative |
| P01088 | SHRRLILAAAVLLSVLAAAS  | Negative |
| P01092 | PASADTTVSEPAPSCVTLYQ  | Negative |
| P01092 | ASADTTVSEPAPSCVTLYQS  | Negative |
| P01092 | ALSPLAAGPASADTTVSEPA  | Negative |
| P01092 | GPASADTTVSEPAPSCVTLY  | Negative |
| P01092 | AGAALALSPLAAGPASADTT  | Negative |
| P01092 | ALRLAALVGAGAALALSPLA  | Negative |
| P01092 | AALVGAGAALALSPLAAGPA  | Negative |
| P01092 | VGAGAALALSPLAAGPASAD  | Negative |
| P01092 | LSPLAAGPASADTTVSEPA   | Negative |
| P01092 | GAALALSPLAAGPASADTTV  | Negative |
| P01092 | LALSPLAAGPASADTTVSEP  | Negative |
| P01092 | ALVGAGAALALSPLAAGPAS  | Negative |
| P01092 | AGPASADTTVSEPAPSCVTL  | Negative |
| P01092 | ADTTVSEPAPSCVTLYQSWR  | Negative |



|        |                       |          |
|--------|-----------------------|----------|
| P01092 | RVRALRLAALVGAGAALALS  | Negative |
| P01092 | LVGAGAALALSPLAAGPASA  | Negative |
| P01092 | SADTTVSEPAPSCVTLYQSW  | Negative |
| P01092 | SPLAAGPASADTTVSEPAPS  | Negative |
| P01092 | PLAAGPASADTTVSEPAPSC  | Negative |
| P01092 | GAGAALALSPLAAGPASADT  | Negative |
| P01092 | ALALSPLAAGPASADTTVSE  | Negative |
| P01092 | RALRLAALVGAGAALALSPL  | Negative |
| P01092 | MRVRALRLAALVGAGAALAL  | Negative |
| P01092 | AAGPASADTTVSEPAPSCVT  | Negative |
| P01092 | LRLAALVGAGAALALSPLAA  | Negative |
| P01092 | LAAGPASADTTVSEPAPSCV  | Negative |
| P01092 | LAALVGAGAALALSPLAAGP  | Negative |
| P01092 | VRALRLAALVGAGAALALSP  | Negative |
| P01092 | RLAALVGAGAALALSPLAAG  | Negative |
| P01137 | GLRLLLLLLPLLWLLVLTPG  | Negative |
| P01137 | VLTPGRPAAGLSTCKTIDME  | Negative |
| P01137 | LLLPLLWLLVLTPGRPAAGL  | Negative |
| P01137 | GLSTCKTIDMELVKRKRIEA  | Negative |
| P01137 | PLLWLLVLTPGRPAAGLSTC  | Negative |
| P01137 | AGLSTCKTIDMELVKRKRIE  | Negative |
| P01137 | LSTCKTIDMELVKRKRIEAI  | Negative |
| P01137 | RPAAGLSTCKTIDMELVKRK  | Negative |
| P01137 | LLLPLLWLLVLTPGRPAAG   | Negative |
| P01137 | PGRPAAGLSTCKTIDMELVK  | Negative |
| P01137 | TPGRPAAGLSTCKTIDMELV  | Negative |
| P01137 | SGLRLLLLLLPLLWLLVLTP  | Negative |
| P01137 | LWLLVLTPGRPAAGLSTCKT  | Negative |
| P01137 | WLLVLTPGRPAAGLSTCKTI  | Negative |
| P01137 | LTPGRPAAGLSTCKTIDMEL  | Negative |
| P01137 | PSGLRLLLLLLPLLWLLVLT  | Negative |
| P01137 | LLLLLLPLLWLLVLTPGRPAA | Negative |
| P01137 | LPLLWLLVLTPGRPAAGLST  | Negative |
| P01137 | LLLLLLPLLWLLVLTPGRPA  | Negative |
| P01137 | RLLLLLLPLLWLLVLTPGRP  | Negative |
| P01137 | LLVLTPGRPAAGLSTCKTID  | Negative |
| P01137 | LVLTPGRPAAGLSTCKTIDM  | Negative |
| P01137 | LRLLLLLLPLLWLLVLTPGR  | Negative |
| P01137 | PAAGLSTCKTIDMELVKRKR  | Negative |
| P01137 | GRPAAGLSTCKTIDMELVKR  | Negative |
| P01137 | AAGLSTCKTIDMELVKRKRI  | Negative |
| P01137 | MPPSGLRLLLLLLPLLWLLV  | Negative |
| P01137 | LLPLLWLLVLTPGRPAAGLS  | Negative |
| P01137 | PPSGLRLLLLLLPLLWLLVL  | Negative |
| P01148 | WCVEGCSSQHWSYGLRPGGK  | Negative |
| P01148 | ILLTWCVEGCSSQHWSYGLR  | Negative |

|        |                      |          |
|--------|----------------------|----------|
| P01148 | QKLLAGLILLTWCVEGCSSQ | Negative |
| P01148 | LRPGGKRDAENLIDSFQEIV | Negative |
| P01148 | CVEGCSSQHWSYGLRPGGKR | Negative |
| P01148 | LILLTWCVEGCSSQHWSYGL | Negative |
| P01148 | YGLRPGGKRDAENLIDSFQE | Negative |
| P01148 | GLILLTWCVEGCSSQHWSYG | Negative |
| P01148 | LLTWCVEGCSSQHWSYGLRP | Negative |
| P01148 | MKPIQKLLAGLILLTWCVEG | Negative |
| P01148 | LAGLILLTWCVEGCSSQHWS | Negative |
| P01148 | SQHWSYGLRPGGKRDAENLI | Negative |
| P01148 | QHWSYGLRPGGKRDAENLID | Negative |
| P01148 | LTWCVEGCSSQHWSYGLRPG | Negative |
| P01148 | VEGCSSQHWSYGLRPGGKRD | Negative |
| P01148 | IQKLLAGLILLTWCVEGCSS | Negative |
| P01148 | TWCVEGCSSQHWSYGLRPGG | Negative |
| P01148 | LLAGLILLTWCVEGCSSQHW | Negative |
| P01148 | SSQHWSYGLRPGGKRDAENL | Negative |
| P01148 | KLLAGLILLTWCVEGCSSQH | Negative |
| P01148 | HWSYGLRPGGKRDAENLIDS | Negative |
| P01148 | EGCSSQHWSYGLRPGGKRDA | Negative |
| P01148 | GCSSQHWSYGLRPGGKRDAE | Negative |
| P01148 | WSYGLRPGGKRDAENLIDSF | Negative |
| P01148 | PIQKLLAGLILLTWCVEGCS | Negative |
| P01148 | GLRPGGKRDAENLIDSFQEI | Negative |
| P01148 | CSSQHWSYGLRPGGKRDAEN | Negative |
| P01148 | SYGLRPGGKRDAENLIDSFQ | Negative |
| P01148 | KPIQKLLAGLILLTWCVEGC | Negative |
| P01161 | PGHIGANPVYSAVSNTDLM  | Negative |
| P01161 | LPGHIGANPVYSAVSNTDLM | Negative |
| P01161 | GHIGANPVYSAVSNTDLMDF | Negative |
| P01161 | KGFFLFLAFWLPGHIGANPV | Negative |
| P01161 | GANPVYSAVSNTDLMDFKNL | Negative |
| P01161 | YSAVSNTDLMDFKNLLDHLE | Negative |
| P01161 | SITKGFFLFLAFWLPGHIGA | Negative |
| P01161 | GSFSITKGFFLFLAFWLPGH | Negative |
| P01161 | LAFWLPGHIGANPVYSAVSN | Negative |
| P01161 | HIGANPVYSAVSNTDLMDFK | Negative |
| P01161 | AVSNTDLMDFKNLLDHLEEK | Negative |
| P01161 | WLPGHIGANPVYSAVSNTDL | Negative |
| P01161 | SAVSNTDLMDFKNLLDHLEE | Negative |
| P01161 | FLFLAFWLPGHIGANPVYSA | Negative |
| P01161 | AFWLPGHIGANPVYSAVSNT | Negative |
| P01161 | SFSITKGFFLFLAFWLPGHI | Negative |
| P01161 | PVYSAVSNTDLMDFKNLLDH | Negative |
| P01161 | IGANPVYSAVSNTDLMDFKN | Negative |
| P01161 | LFLAFWLPGHIGANPVYSAV | Negative |

|        |                       |          |
|--------|-----------------------|----------|
| P01161 | VYSAVSNTDLMDFKNLLDHL  | Negative |
| P01161 | NPVYSAVSNTDLMDFKNLLD  | Negative |
| P01161 | FWLPGHIGANPVYSAVSNTD  | Negative |
| P01161 | TKGFFLFLAFWLPGHIGANP  | Negative |
| P01161 | FSITKGFFLFLAFWLPGHIG  | Negative |
| P01161 | FLAFWLPGHIGANPVYSAVS  | Negative |
| P01161 | GFFLFLAFWLPGHIGANPVY  | Negative |
| P01161 | MGSFSITKGFFLFLAFWLPG  | Negative |
| P01161 | ITKGFFLFLAFWLPGHIGAN  | Negative |
| P01161 | ANPVYSAVSNTDLMDFKNLL  | Negative |
| P01165 | FGWTPALAYSPRTPDRVSET  | Negative |
| P01165 | AYSRTPDRVSETDIQRLLH   | Negative |
| P01165 | PDRVSETDIQRLLHGVMEQL  | Negative |
| P01165 | DRVSETDIQRLLHGVMEQLG  | Negative |
| P01165 | MLSGLVLWLTFGWTPALAYS  | Negative |
| P01165 | ALAYSPRTPDRVSETDIQRL  | Negative |
| P01165 | VSTMLSGLVLWLTFGWTPAL  | Negative |
| P01165 | TMLSGLVLWLTFGWTPALAY  | Negative |
| P01165 | WLTFGWTPALAYSPRTPDRV  | Negative |
| P01165 | STMLSGLVLWLTFGWTPALA  | Negative |
| P01165 | TPDRVSETDIQRLLHGVMEQ  | Negative |
| P01165 | PALAYSPRTPDRVSETDIQR  | Negative |
| P01165 | SGLVLWLTFGWTPALAYSPR  | Negative |
| P01165 | GWTPALAYSPRTPDRVSETD  | Negative |
| P01165 | LTFGWTPALAYSPRTPDRVS  | Negative |
| P01165 | VLWLTFGWTPALAYSPRTPD  | Negative |
| P01165 | LSGLVLWLTFGWTPALAYSP  | Negative |
| P01165 | LAYSPRTPDRVSETDIQRLL  | Negative |
| P01165 | MVSTMLSGLVLWLTFGWTPA  | Negative |
| P01165 | YSPRTPDRVSETDIQRLLHG  | Negative |
| P01165 | SPRTPDRVSETDIQRLLHGV  | Negative |
| P01165 | RVSETDIQRLLHGVMEQLGI  | Negative |
| P01165 | TPALAYSPRTPDRVSETDIQ  | Negative |
| P01165 | RTPDRVSETDIQRLLHGVME  | Negative |
| P01165 | P RTPDRVSETDIQRLLHGVM | Negative |
| P01165 | LVLWLTFGWTPALAYSPRTP  | Negative |
| P01165 | WTPALAYSPRTPDRVSETDI  | Negative |
| P01165 | TFGWTPALAYSPRTPDRVSE  | Negative |
| P01165 | LWLTFGWTPALAYSPRTPDR  | Negative |
| P01168 | VLALGGVTGAPSDPRLRQFL  | Negative |
| P01168 | CALAALSIVLALGGVTGAPS  | Negative |
| P01168 | LSIVLALGGVTGAPSDPRLR  | Negative |
| P01168 | ALSIVLALGGVTGAPSDPRL  | Negative |
| P01168 | LSCRLQCALAALSIVLALGG  | Negative |
| P01168 | GGVTGAPSDPRLRQFLQKSL  | Negative |
| P01168 | PRLRQFLQKSLAAAAGKQEL  | Negative |

|        |                      |          |
|--------|----------------------|----------|
| P01168 | SCRLQCALAALSIVLALGGV | Negative |
| P01168 | CRLQCALAALSIVLALGGVT | Negative |
| P01168 | MLSCRLQCALAALSIVLALG | Negative |
| P01168 | RLQCALAALSIVLALGGVTG | Negative |
| P01168 | AALSIVLALGGVTGAPSDPR | Negative |
| P01168 | APSDPRLRQFLQKSLAAAAG | Negative |
| P01168 | IVLALGGVTGAPSDPRLRQF | Negative |
| P01168 | SIVLALGGVTGAPSDPRLRQ | Negative |
| P01168 | DPRLRQFLQKSLAAAAGKQE | Negative |
| P01168 | QCALAALSIVLALGGVTGAP | Negative |
| P01168 | SDPRLRQFLQKSLAAAAGKQ | Negative |
| P01168 | GVTGAPSDPRLRQFLQKSLA | Negative |
| P01168 | VTGAPSDPRLRQFLQKSLAA | Negative |
| P01168 | ALGGVTGAPSDPRLRQFLQK | Negative |
| P01168 | LQCALAALSIVLALGGVTGA | Negative |
| P01168 | GAPSDPRLRQFLQKSLAAAA | Negative |
| P01168 | ALAALSIVLALGGVTGAPSD | Negative |
| P01168 | PSDPRLRQFLQKSLAAAAGK | Negative |
| P01168 | LGGVTGAPSDPRLRQFLQKS | Negative |
| P01168 | LALGGVTGAPSDPRLRQFLQ | Negative |
| P01168 | RLRQFLQKSLAAAAGKQELA | Negative |
| P01168 | TGAPSDPRLRQFLQKSLAAA | Negative |
| P01170 | LVLCGPSVSSQLDREQSDNQ | Negative |
| P01170 | ALLALVLCGPSVSSQLDREQ | Negative |
| P01170 | CPAILALLALVLCGPSVSSQ | Negative |
| P01170 | VSSQLDREQSDNQDLDELR  | Negative |
| P01170 | CIRCPAILALLALVLCGPSV | Negative |
| P01170 | SQLDREQSDNQDLDELRQH  | Negative |
| P01170 | DREQSDNQDLDELRQHWLL  | Negative |
| P01170 | IRCPAILALLALVLCGPSVS | Negative |
| P01170 | QSDNQDLDELRQHWLLERA  | Negative |
| P01170 | QLDREQSDNQDLDELRQHW  | Negative |
| P01170 | QCIRCPAILALLALVLCGPS | Negative |
| P01170 | VLCGPSVSSQLDREQSDNQD | Negative |
| P01170 | LCGPSVSSQLDREQSDNQDL | Negative |
| P01170 | SVSSQLDREQSDNQDLDELE | Negative |
| P01170 | SSQLDREQSDNQDLDELRQ  | Negative |
| P01170 | MQCIRCPAILALLALVLCGP | Negative |
| P01170 | LLALVLCGPSVSSQLDREQS | Negative |
| P01170 | LALVLCGPSVSSQLDREQSD | Negative |
| P01170 | PSVSSQLDREQSDNQDLDE  | Negative |
| P01170 | EQSDNQDLDELRQHWLLER  | Negative |
| P01170 | CGPSVSSQLDREQSDNQDL  | Negative |
| P01170 | RCPAILALLALVLCGPSVSS | Negative |
| P01170 | AILALLALVLCGPSVSSQLD | Negative |
| P01170 | REQSDNQDLDELRQHWLLE  | Negative |

|        |                      |          |
|--------|----------------------|----------|
| P01170 | PAILALLALVLCGPSVSSQL | Negative |
| P01170 | LDREQSDNQDLDLELRQHWL | Negative |
| P01170 | ILALLALVLCGPSVSSQLDR | Negative |
| P01170 | ALVLCGPSVSSQLDREQSDN | Negative |
| P01170 | GPSVSSQLDREQSDNQDLDL | Negative |
| P01174 | VLGLLALEVALARNLQEHVF | Negative |
| P01174 | QEHVFNSVQSMCSDDSFSED | Negative |
| P01174 | SISLVLGLLALEVALARNLQ | Negative |
| P01174 | ARNLQEHVFNSVQSMCSDDS | Negative |
| P01174 | CSISLVLGLLALEVALARNL | Negative |
| P01174 | VALARNLQEHVFNSVQSMCS | Negative |
| P01174 | EVALARNLQEHVFNSVQSMC | Negative |
| P01174 | NSVQSMCSDDSFSEDTECIN | Negative |
| P01174 | LGLLALEVALARNLQEHVFN | Negative |
| P01174 | LVLGLLALEVALARNLQEHV | Negative |
| P01174 | HVFNSVQSMCSDDSFSEDTE | Negative |
| P01174 | VQSMCSDDSFSEDTECINCQ | Negative |
| P01174 | RNLQEHVFNSVQSMCSDDSF | Negative |
| P01174 | FNSVQSMCSDDSFSEDTECI | Negative |
| P01174 | EHVFNSVQSMCSDDSFSED  | Negative |
| P01174 | MRCISLVLGLLALEVALAR  | Negative |
| P01174 | NLQEHVFNSVQSMCSDDSFS | Negative |
| P01174 | VFNSVQSMCSDDSFSEDTEC | Negative |
| P01174 | GLLALEVALARNLQEHVFNS | Negative |
| P01174 | LARNLQEHVFNSVQSMCSD  | Negative |
| P01174 | LQEHVFNSVQSMCSDDSFSE | Negative |
| P01174 | ALEVALARNLQEHVFNSVQS | Negative |
| P01174 | ALARNLQEHVFNSVQSMCSD | Negative |
| P01174 | SVQSMCSDDSFSEDTECINC | Negative |
| P01174 | LLALEVALARNLQEHVFNSV | Negative |
| P01174 | RCSISLVLGLLALEVALARN | Negative |
| P01174 | LEVALARNLQEHVFNSVQSM | Negative |
| P01174 | SLVLGLLALEVALARNLQEH | Negative |
| P01174 | LALEVALARNLQEHVFNSVQ | Negative |
| P01175 | CYIQNCPLGGKRAVLDLVR  | Negative |
| P01175 | TSACYIQNCPLGGKRAVL   | Negative |
| P01175 | ACCLLGLLALTSACYIQNC  | Negative |
| P01175 | SACYIQNCPLGGKRAVL    | Negative |
| P01175 | NCPLGGKRAVL          | Negative |
| P01175 | ALTSACYIQNCPLGGKRAVL | Negative |
| P01175 | LLGLLALTSACYIQNCPLGG | Negative |
| P01175 | CCLLGLLALTSACYIQNCPL | Negative |
| P01175 | ACYIQNCPLGGKRAVL     | Negative |
| P01175 | LACCLLGLLALTSACYIQNC | Negative |
| P01175 | PLGGKRAVL            | Negative |
| P01175 | CLLGLLALTSACYIQNCPLG | Negative |

|        |                       |          |
|--------|-----------------------|----------|
| P01175 | GGKRAVLDLVDVRTCLPCGPG | Negative |
| P01175 | LLALTSACYIQNCPLGGKRA  | Negative |
| P01175 | QNCPLGGKRAVLDLVDVRTCL | Negative |
| P01175 | GLLALTSACYIQNCPLGGKR  | Negative |
| P01175 | GKRAVLDLVDVRTCLPCGPGG | Negative |
| P01175 | LTSACYIQNCPLGGKRAVL   | Negative |
| P01175 | IQNCPLGGKRAVLDLVDVRTC | Negative |
| P01175 | AGSSLACCLLGLLALTSACY  | Negative |
| P01175 | LGLLALTSACYIQNCPLGGK  | Negative |
| P01175 | LALTSACYIQNCPLGGKRAV  | Negative |
| P01175 | MAGSSLACCLLGLLALTSAC  | Negative |
| P01175 | YIQNCPLGGKRAVLDLVDVRT | Negative |
| P01175 | GSSLACCLLGLLALTSACYI  | Negative |
| P01175 | CPLGGKRAVLDLVDVRTCLPC | Negative |
| P01175 | KRAVLDLVDVRTCLPCGPGGK | Negative |
| P01175 | SSLACCLLGLLALTSACYIQ  | Negative |
| P01175 | LGGKRAVLDLVDVRTCLPCGP | Negative |
| P01180 | KRAMSDLELRQCLPCGPGGK  | Negative |
| P01180 | FLSLLAFTSACYFQNCPRGG  | Negative |
| P01180 | LLAFTSACYFQNCPRGGKRA  | Negative |
| P01180 | ACYFQNCPRGGKRAMSDLEL  | Negative |
| P01180 | GGKRAMSDLELRQCLPCGPG  | Negative |
| P01180 | CYFQNCPRGGKRAMSDLELR  | Negative |
| P01180 | PACFLSLLAFTSACYFQNC   | Negative |
| P01180 | MPDATLPACFLSLLAFTSAC  | Negative |
| P01180 | NCPRGGKRAMSDLELRQCLP  | Negative |
| P01180 | SLLAFTSACYFQNCPRGGKR  | Negative |
| P01180 | PRGGKRAMSDLELRQCLPCG  | Negative |
| P01180 | TSACYFQNCPRGGKRAMSDL  | Negative |
| P01180 | RGGKRAMSDLELRQCLPCGP  | Negative |
| P01180 | LAFTSACYFQNCPRGGKRAM  | Negative |
| P01180 | YFQNCPRGGKRAMSDLELRQ  | Negative |
| P01180 | FQNCPRGGKRAMSDLELRQC  | Negative |
| P01180 | PDATLPACFLSLLAFTSACY  | Negative |
| P01180 | AFTSACYFQNCPRGGKRAMS  | Negative |
| P01180 | LPACFLSLLAFTSACYFQNC  | Negative |
| P01180 | CPRGGKRAMSDLELRQCLPC  | Negative |
| P01180 | QNCPRGGKRAMSDLELRQCL  | Negative |
| P01180 | ACFLSLLAFTSACYFQNCPR  | Negative |
| P01180 | SACYFQNCPRGGKRAMSDLE  | Negative |
| P01180 | FTSACYFQNCPRGGKRAMSD  | Negative |
| P01180 | ATLPACFLSLLAFTSACYFQ  | Negative |
| P01180 | GKRAMSDLELRQCLPCGPGG  | Negative |
| P01180 | CFLSLLAFTSACYFQNCPRG  | Negative |
| P01180 | DATLPACFLSLLAFTSACYF  | Negative |
| P01180 | LSLLAFTSACYFQNCPRGGK  | Negative |

|        |                      |          |
|--------|----------------------|----------|
| P01183 | GKRAMSDLELRQCLPCGPGG | Negative |
| P01183 | LTSACYFQNCPKGKRAMSD  | Negative |
| P01183 | PACFLGLLALTSACYFQNC  | Negative |
| P01183 | PDATLPACFLGLLALTSACY | Negative |
| P01183 | GGKRAMSDLELRQCLPCGPG | Negative |
| P01183 | ACFLGLLALTSACYFQNC   | Negative |
| P01183 | NCPKGGKRAMSDLELRQCLP | Negative |
| P01183 | QNCPKGKRAMSDLELRQCL  | Negative |
| P01183 | YFQNCPKGKRAMSDLELRQ  | Negative |
| P01183 | FLGLLALTSACYFQNCPKG  | Negative |
| P01183 | LGLLALTSACYFQNCPKGK  | Negative |
| P01183 | ACYFQNCPKGKRAMSDLEL  | Negative |
| P01183 | GLLALTSACYFQNCPKGK   | Negative |
| P01183 | LALTSACYFQNCPKGKRAM  | Negative |
| P01183 | KRAMSDLELRQCLPCGPGGK | Negative |
| P01183 | LPACFLGLLALTSACYFQNC | Negative |
| P01183 | CFLGLLALTSACYFQNC    | Negative |
| P01183 | KGGKRAMSDLELRQCLPCGP | Negative |
| P01183 | LLALTSACYFQNCPKGKRA  | Negative |
| P01183 | CYFQNCPKGKRAMSDLELR  | Negative |
| P01183 | CPKGGKRAMSDLELRQCLPC | Negative |
| P01183 | PKGKRAMSDLELRQCLPCG  | Negative |
| P01183 | SACYFQNCPKGKRAMSDLE  | Negative |
| P01183 | FQNCPKGKRAMSDLELRQC  | Negative |
| P01183 | MPDATLPACFLGLLALTSAC | Negative |
| P01183 | ATLPACFLGLLALTSACYFQ | Negative |
| P01183 | ALTSACYFQNCPKGKRAMS  | Negative |
| P01183 | TSACYFQNCPKGKRAMSDL  | Negative |
| P01183 | DATLPACFLGLLALTSACYF | Negative |
| P01185 | TMLPACFLGLLAFSSACYFQ | Negative |
| P01185 | LPACFLGLLAFSSACYFQNC | Negative |
| P01185 | ACYFQNCPRGGKRAMSDLEL | Negative |
| P01185 | PDTMLPACFLGLLAFSSACY | Negative |
| P01185 | RGGKRAMSDLELRQCLPCGP | Negative |
| P01185 | FSSACYFQNCPRGGKRAMSD | Negative |
| P01185 | GKRAMSDLELRQCLPCGPGG | Negative |
| P01185 | ACFLGLLAFSSACYFQNCPR | Negative |
| P01185 | CFLGLLAFSSACYFQNCPRG | Negative |
| P01185 | GLLAFSSACYFQNCPRGGKR | Negative |
| P01185 | MPDTMLPACFLGLLAFSSAC | Negative |
| P01185 | SACYFQNCPRGGKRAMSDLE | Negative |
| P01185 | PRGGKRAMSDLELRQCLPCG | Negative |
| P01185 | QNCPRGGKRAMSDLELRQCL | Negative |
| P01185 | NCPRGGKRAMSDLELRQCLP | Negative |
| P01185 | LGLLAFSSACYFQNCPRGGK | Negative |
| P01185 | KRAMSDLELRQCLPCGPGGK | Negative |

|        |                        |          |
|--------|------------------------|----------|
| P01185 | FQNCPRGGKRAMSDLELRQC   | Negative |
| P01185 | PACFLGLLAFSSACYFQNC    | Negative |
| P01185 | GGKRAMSDLELRQCLPCGPG   | Negative |
| P01185 | LAFSSACYFQNCPRGGKRAM   | Negative |
| P01185 | LLAFSSACYFQNCPRGGKRA   | Negative |
| P01185 | CYFQNCPRGGKRAMSDLELR   | Negative |
| P01185 | DTMLPACFLGLLAFSSACYF   | Negative |
| P01185 | AFSSACYFQNCPRGGKRAMS   | Negative |
| P01185 | CPRGGKRAMSDLELRQCLPC   | Negative |
| P01185 | SSACYFQNCPRGGKRAMSDL   | Negative |
| P01185 | FLGLLAFSSACYFQNCPRGG   | Negative |
| P01185 | YFQNCPRGGKRAMSDLELRQ   | Negative |
| P01189 | SCCSRSGALLLALLLQASME   | Negative |
| P01189 | SRSRSGALLLALLLQASMEVRG | Negative |
| P01189 | PRSCCSRSGALLLALLLQAS   | Negative |
| P01189 | ASMEVRGWCLESSQCQDLTT   | Negative |
| P01189 | WCLESSQCQDLTTESNLLEC   | Negative |
| P01189 | RGWCLESSQCQDLTTESNLL   | Negative |
| P01189 | ESSQCQDLTTESNLLECIRA   | Negative |
| P01189 | CSRSGALLLALLLQASMEVR   | Negative |
| P01189 | LLLQASMEVRGWCLESSQCQ   | Negative |
| P01189 | LLQASMEVRGWCLESSQCQD   | Negative |
| P01189 | LALLLQASMEVRGWCLESSQ   | Negative |
| P01189 | SMEVRGWCLESSQCQDLTTE   | Negative |
| P01189 | QASMEVRGWCLESSQCQDLT   | Negative |
| P01189 | SGALLLALLLQASMEVRGWC   | Negative |
| P01189 | CLESSQCQDLTTESNLLECI   | Negative |
| P01189 | LQASMEVRGWCLESSQCQDL   | Negative |
| P01189 | ALLLQASMEVRGWCLESSQC   | Negative |
| P01189 | CCSRSGALLLALLLQASMEV   | Negative |
| P01189 | EVRGWCLESSQCQDLTTESN   | Negative |
| P01189 | LESSQCQDLTTESNLLECIR   | Negative |
| P01189 | MPRSCCSRSGALLLALLLQA   | Negative |
| P01189 | MEVRGWCLESSQCQDLTTES   | Negative |
| P01189 | GWLESSQCQDLTTESNLLE    | Negative |
| P01189 | VRGWCLESSQCQDLTTESNL   | Negative |
| P01189 | RSCCSRSGALLLALLLQASM   | Negative |
| P01189 | RSGALLLALLLQASMEVRGW   | Negative |
| P01189 | LLALLLQASMEVRGWCLESS   | Negative |
| P01189 | GALLLALLLQASMEVRGWCL   | Negative |
| P01189 | ALLLALLLQASMEVRGWCLE   | Negative |
| P01215 | FLVTLVFLHVLHSAPDVQD    | Negative |
| P01215 | SVFLHVLHSAPDVQDCPECT   | Negative |
| P01215 | YRKYAAIFLVTLVFLHVLH    | Negative |
| P01215 | DYYRKYAAIFLVTLVFLHV    | Negative |
| P01215 | VTLVFLHVLHSAPDVQDCP    | Negative |



|        |                      |          |
|--------|----------------------|----------|
| P01215 | RKYAAIFLVTLSVFLHVLHS | Negative |
| P01215 | HSAPDVQDCPECTLQENPFF | Negative |
| P01215 | YYRKYAAIFLVTLSVFLHVL | Negative |
| P01215 | VLHSAPDVQDCPECTLQENP | Negative |
| P01215 | QDCPECTLQENPFFSQPGAP | Negative |
| P01215 | DCPECTLQENPFFSQPGAPI | Negative |
| P01215 | AAIFLVTLSVFLHVLHSAPD | Negative |
| P01215 | PDVQDCPECTLQENPFFSQP | Negative |
| P01215 | LHVLHSAPDVQDCPECTLQE | Negative |
| P01215 | KYAAIFLVTLSVFLHVLHSA | Negative |
| P01215 | LSVFLHVLHSAPDVQDCPEC | Negative |
| P01215 | SAPDVQDCPECTLQENPFFS | Negative |
| P01215 | TLSVFLHVLHSAPDVQDCPE | Negative |
| P01215 | MDYYRKYAAIFLVTLSVFLH | Negative |
| P01215 | APDVQDCPECTLQENPFFSQ | Negative |
| P01215 | HVLHSAPDVQDCPECTLQEN | Negative |
| P01215 | YAAIFLVTLSVFLHVLHSAP | Negative |
| P01215 | VFLHVLHSAPDVQDCPECTL | Negative |
| P01215 | LVTLSVFLHVLHSAPDVQDC | Negative |
| P01215 | DVQDCPECTLQENPFFSQPG | Negative |
| P01215 | LHSAPDVQDCPECTLQENPF | Negative |
| P01215 | VQDCPECTLQENPFFSQPGA | Negative |
| P01215 | AIFLVTLSVFLHVLHSAPDV | Negative |
| P01215 | FLHVLHSAPDVQDCPECTLQ | Negative |
| P01217 | PDGEFTMQGCPECKLKENKY | Negative |
| P01217 | AAVILAILSLFLQILHSFPD | Negative |
| P01217 | KYAAVILAILSLFLQILHSF | Negative |
| P01217 | LQILHSFPDGEFTMQGCPEC | Negative |
| P01217 | SLFLQILHSFPDGEFTMQGC | Negative |
| P01217 | LAILSLFLQILHSFPDGEFT | Negative |
| P01217 | ILSLFLQILHSFPDGEFTMQ | Negative |
| P01217 | GEFTMQGCPECKLKENKYFS | Negative |
| P01217 | FTMQGCPECKLKENKYFSKP | Negative |
| P01217 | DYYRKYAAVILAILSLFLQI | Negative |
| P01217 | ILAILSLFLQILHSFPDGEF | Negative |
| P01217 | YRKYAAVILAILSLFLQILH | Negative |
| P01217 | LFLQILHSFPDGEFTMQGCP | Negative |
| P01217 | YAAVILAILSLFLQILHSFP | Negative |
| P01217 | RKYAAVILAILSLFLQILHS | Negative |
| P01217 | SFPDGEFTMQGCPECKLKEN | Negative |
| P01217 | AILSLFLQILHSFPDGEFTM | Negative |
| P01217 | ILHSFPDGEFTMQGCPECKL | Negative |
| P01217 | FLQILHSFPDGEFTMQGCPE | Negative |
| P01217 | FPDGEFTMQGCPECKLKENK | Negative |
| P01217 | AVILAILSLFLQILHSFPDG | Negative |
| P01217 | MDYYRKYAAVILAILSLFLQ | Negative |

|        |                       |          |
|--------|-----------------------|----------|
| P01217 | YYRKYAAVILAILSLFLQIL  | Negative |
| P01217 | LHSFPDGEFTMQGCPECKLK  | Negative |
| P01217 | HSFPDGEFTMQGCPECKLKE  | Negative |
| P01217 | LSLFLQILHSFPDGEFTMQG  | Negative |
| P01217 | QILHSFPDGEFTMQGCPECK  | Negative |
| P01217 | EFTMQGCPECKLKENKYFSK  | Negative |
| P01217 | DGEFTMQGCPECKLKENKYF  | Negative |
| P01218 | LAILSLFLQILHSFPDGEFT  | Negative |
| P01218 | LQILHSFPDGEFTMQGCPEC  | Negative |
| P01218 | LSLFLQILHSFPDGEFTMQG  | Negative |
| P01218 | GEFTMQGCPECKLKENKYFS  | Negative |
| P01218 | FTMQGCPECKLKENKYFSKP  | Negative |
| P01218 | LFLQILHSFPDGEFTMQGCP  | Negative |
| P01218 | FPDGEFTMQGCPECKLKENK  | Negative |
| P01218 | KYAAAILAILSLFLQILHSF  | Negative |
| P01218 | YAAAILAILSLFLQILHSFP  | Negative |
| P01218 | DYYRKYAAAILAILSLFLQI  | Negative |
| P01218 | DGEFTMQGCPECKLKENKYF  | Negative |
| P01218 | AAAILAILSLFLQILHSFPD  | Negative |
| P01218 | RKYAAAILAILSLFLQILHS  | Negative |
| P01218 | HSFPDGEFTMQGCPECKLKE  | Negative |
| P01218 | EFTMQGCPECKLKENKYFSK  | Negative |
| P01218 | ILAILSLFLQILHSFPDGEF  | Negative |
| P01218 | YYRKYAAAILAILSLFLQIL  | Negative |
| P01218 | LHSFPDGEFTMQGCPECKLK  | Negative |
| P01218 | MDYYRKYAAAILAILSLFLQ  | Negative |
| P01218 | AILSLFLQILHSFPDGEFTM  | Negative |
| P01218 | SLFLQILHSFPDGEFTMQGC  | Negative |
| P01218 | ILSLFLQILHSFPDGEFTMQ  | Negative |
| P01218 | AAAILAILSLFLQILHSFPDG | Negative |
| P01218 | YRKYAAAILAILSLFLQILH  | Negative |
| P01218 | PDGEFTMQGCPECKLKENKY  | Negative |
| P01218 | ILHSFPDGEFTMQGCPECKL  | Negative |
| P01218 | FLQILHSFPDGEFTMQGCPE  | Negative |
| P01218 | SFPDGEFTMQGCPECKLKEN  | Negative |
| P01218 | QILHSFPDGEFTMQGCPECK  | Negative |
| P01221 | RLGQLYPRNDMNNFGCEECK  | Negative |
| P01221 | MLIRLGQLYPRNDMNNFGCE  | Negative |
| P01221 | PRNDMNNFGCEECKLKENNI  | Negative |
| P01221 | LGQLYPRNDMNNFGCEECKL  | Negative |
| P01221 | LFFMLIRLGQLYPRNDMNNF  | Negative |
| P01221 | FWTRYAGASILLFFMLIRLG  | Negative |
| P01221 | NNFGCEECKLKENNIFSKPG  | Negative |
| P01221 | QLYPRNDMNNFGCEECKLKE  | Negative |
| P01221 | FMLIRLGQLYPRNDMNNFGC  | Negative |
| P01221 | YAGASILLFFMLIRLGQLYP  | Negative |

|        |                       |          |
|--------|-----------------------|----------|
| P01221 | NDMNNFGCEECKLKENNIFS  | Negative |
| P01221 | RNDMNNFGCEECKLKENNIF  | Negative |
| P01221 | MFWTRYAGASILLFFMLIRL  | Negative |
| P01221 | MNNFGCEECKLKENNIFSKP  | Negative |
| P01221 | WTRYAGASILLFFMLIRLGQ  | Negative |
| P01221 | GASILLFFMLIRLGQLYPRN  | Negative |
| P01221 | RYAGASILLFFMLIRLGQLY  | Negative |
| P01221 | LIRLGQLYPRNDMNNFGCEE  | Negative |
| P01221 | ILLFFMLIRLGQLYPRNDMN  | Negative |
| P01221 | SILLFFMLIRLGQLYPRNDM  | Negative |
| P01221 | GQLYPRNDMNNFGCEECKLK  | Negative |
| P01221 | AGASILLFFMLIRLGQLYPR  | Negative |
| P01221 | DMNNFGCEECKLKENNIFSK  | Negative |
| P01221 | LLFFMLIRLGQLYPRNDMNN  | Negative |
| P01221 | TRYAGASILLFFMLIRLGQL  | Negative |
| P01221 | LYPRNDMNNFGCEECKLKEN  | Negative |
| P01221 | YPRNDMNNFGCEECKLKENN  | Negative |
| P01221 | IRLGQLYPRNDMNNFGCEEC  | Negative |
| P01221 | FFMLIRLGQLYPRNDMNNFG  | Negative |
| P01222 | CIPTEYTMHIERRECA YCLT | Negative |
| P01222 | LFLMSMLFGLTCGQAMSFCI  | Negative |
| P01222 | FCIPTEYTMHIERRECA YCL | Negative |
| P01222 | AMSFCIPTEYTMHIERRECA  | Negative |
| P01222 | HIERRECA YCLTINTTICAG | Negative |
| P01222 | QAMSFCIPTEYTMHIERREC  | Negative |
| P01222 | IPTEYTMHIERRECA YCLTI | Negative |
| P01222 | MHIERRECA YCLTINTTICA | Negative |
| P01222 | GQAMSFCIPTEYTMHIERRE  | Negative |
| P01222 | LFGLTCGQAMSFCIPTEYTM  | Negative |
| P01222 | LTCGQAMSFCIPTEYTMHIE  | Negative |
| P01222 | YTMHIERRECA YCLTINTTI | Negative |
| P01222 | SFCIPTEYTMHIERRECA YC | Negative |
| P01222 | TALFLMSMLFGLTCGQAMSF  | Negative |
| P01222 | TCGQAMSFCIPTEYTMHIER  | Negative |
| P01222 | SMLFGLTCGQAMSFCIPTEY  | Negative |
| P01222 | MTALFLMSMLFGLTCGQAMS  | Negative |
| P01222 | TMHIERRECA YCLTINTTIC | Negative |
| P01222 | ALFLMSMLFGLTCGQAMSFC  | Negative |
| P01222 | CGQAMSFCIPTEYTMHIERR  | Negative |
| P01222 | PTEYTMHIERRECA YCLTIN | Negative |
| P01222 | TEYTMHIERRECA YCLTINT | Negative |
| P01222 | FLMSMLFGLTCGQAMSFCIP  | Negative |
| P01222 | FGLTCGQAMSFCIPTEYTMH  | Negative |
| P01222 | EYTMHIERRECA YCLTINTT | Negative |
| P01222 | MSMLFGLTCGQAMSFCIPTE  | Negative |
| P01222 | MLFGLTCGQAMSFCIPTEYT  | Negative |

|        |                       |          |
|--------|-----------------------|----------|
| P01222 | GLTCGQAMSFCIPTEYTMHI  | Negative |
| P01222 | MSFCIPTEYTMHIERRECA Y | Negative |
| P01223 | SFCIPTEYMMHVERKECAYC  | Negative |
| P01223 | FLMSMIFGLACGQAMSFCIP  | Negative |
| P01223 | LACGQAMSFCIPTEYMMHVE  | Negative |
| P01223 | MSFCIPTEYMMHVERKECAY  | Negative |
| P01223 | FGLACGQAMSFCIPTEYMMH  | Negative |
| P01223 | YMMHVERKECAYCLTINTTV  | Negative |
| P01223 | AMSFCIPTEYMMHVERKECA  | Negative |
| P01223 | MHVERKECAYCLTINTTVCA  | Negative |
| P01223 | CIPTEYMMHVERKECAYCLT  | Negative |
| P01223 | MTATFLMSMIFGLACGQAMS  | Negative |
| P01223 | MSMIFGLACGQAMSFCIPTE  | Negative |
| P01223 | GQAMSFCIPTEYMMHVERKE  | Negative |
| P01223 | TATFLMSMIFGLACGQAMSF  | Negative |
| P01223 | IPTEYMMHVERKECAYCLTI  | Negative |
| P01223 | EYMMHVERKECAYCLTINTT  | Negative |
| P01223 | IFGLACGQAMSFCIPTEYMM  | Negative |
| P01223 | SMIFGLACGQAMSFCIPTEY  | Negative |
| P01223 | PTEYMMHVERKECAYCLTIN  | Negative |
| P01223 | MMHVERKECAYCLTINTTVC  | Negative |
| P01223 | TEYMMHVERKECAYCLTINT  | Negative |
| P01223 | HVERKECAYCLTINTTVCAG  | Negative |
| P01223 | QAMSFCIPTEYMMHVERKEC  | Negative |
| P01223 | ACGQAMSFCIPTEYMMHVER  | Negative |
| P01223 | FCIPTEYMMHVERKECAYCL  | Negative |
| P01223 | GLACGQAMSFCIPTEYMMHV  | Negative |
| P01223 | CGQAMSFCIPTEYMMHVERK  | Negative |
| P01223 | ATFLMSMIFGLACGQAMSFC  | Negative |
| P01223 | TFLMSMIFGLACGQAMSFCI  | Negative |
| P01223 | MIFGLACGQAMSFCIPTEYM  | Negative |
| P01224 | GQAMSFCIPTEYMMHVERKE  | Negative |
| P01224 | PTEYMMHVERKECAYCLTIN  | Negative |
| P01224 | GLACGQAMSFCIPTEYMMHV  | Negative |
| P01224 | IPTEYMMHVERKECAYCLTI  | Negative |
| P01224 | AIFLMSMLFGLACGQAMSFC  | Negative |
| P01224 | MSMLFGLACGQAMSFCIPTE  | Negative |
| P01224 | MMHVERKECAYCLTINTTIC  | Negative |
| P01224 | LACGQAMSFCIPTEYMMHVE  | Negative |
| P01224 | LFGLACGQAMSFCIPTEYMM  | Negative |
| P01224 | EYMMHVERKECAYCLTINTT  | Negative |
| P01224 | TAIFLMSMLFGLACGQAMSF  | Negative |
| P01224 | TEYMMHVERKECAYCLTINT  | Negative |
| P01224 | MTAIFLMSMLFGLACGQAMS  | Negative |
| P01224 | MLFGLACGQAMSFCIPTEYM  | Negative |
| P01224 | SMLFGLACGQAMSFCIPTEY  | Negative |

|        |                      |          |
|--------|----------------------|----------|
| P01224 | YMMHVERKECAYCLTINTTI | Negative |
| P01224 | SFCIPTEYMMHVERKECAYC | Negative |
| P01224 | HVERKECAYCLTINTTICAG | Negative |
| P01224 | IFLMSMLFGLACGQAMSFCI | Negative |
| P01224 | FGLACGQAMSFCIPTEYMMH | Negative |
| P01224 | FCIPTEYMMHVERKECAYCL | Negative |
| P01224 | FLMSMLFGLACGQAMSFCIP | Negative |
| P01224 | AMSFCIPTEYMMHVERKECA | Negative |
| P01224 | MSFCIPTEYMMHVERKECAY | Negative |
| P01224 | QAMSFCIPTEYMMHVERKEC | Negative |
| P01224 | MHVERKECAYCLTINTTICA | Negative |
| P01224 | CIPTEYMMHVERKECAYCLT | Negative |
| P01224 | ACGQAMSFCIPTEYMMHVER | Negative |
| P01224 | CGQAMSFCIPTEYMMHVERK | Negative |
| P01225 | ITIAIEKEECRFCISINTTW | Negative |
| P01225 | KAICCNSELTNITIAIEKE  | Negative |
| P01225 | QFFFLFCCWKAICCNSELT  | Negative |
| P01225 | ELTNITIAIEKEECRFCISI | Negative |
| P01225 | ICCNSELTNITIAIEKEEC  | Negative |
| P01225 | NSCELTNITIAIEKEECRFC | Negative |
| P01225 | WKAICCNSELTNITIAIEK  | Negative |
| P01225 | KTLQFFFLFCCWKAICCNSC | Negative |
| P01225 | SCELTNITIAIEKEECRFCI | Negative |
| P01225 | CCWKAICCNSELTNITIAI  | Negative |
| P01225 | NITIAIEKEECRFCISINTT | Negative |
| P01225 | IAIEKEECRFCISINTTWCA | Negative |
| P01225 | LFCCWKAICCNSELTNITI  | Negative |
| P01225 | TNITIAIEKEECRFCISINT | Negative |
| P01225 | TIAIEKEECRFCISINTTWC | Negative |
| P01225 | CWKAICCNSELTNITIAIE  | Negative |
| P01225 | IEKEECRFCISINTTWCAGY | Negative |
| P01225 | FLFCCWKAICCNSELTNIT  | Negative |
| P01225 | AIEKEECRFCISINTTWCAG | Negative |
| P01225 | FFFLFCCWKAICCNSELTN  | Negative |
| P01225 | FCCWKAICCNSELTNITIA  | Negative |
| P01225 | TLQFFFLFCCWKAICCNSC  | Negative |
| P01225 | FFLFCCWKAICCNSELTNI  | Negative |
| P01225 | CCNSELTNITIAIEKEECR  | Negative |
| P01225 | MKTLQFFFLFCCWKAICCN  | Negative |
| P01225 | AICCNSELTNITIAIEKEE  | Negative |
| P01225 | LTNITIAIEKEECRFCISIN | Negative |
| P01225 | CNSELTNITIAIEKEECRF  | Negative |
| P01225 | CELTNITIAIEKEECRFCIS | Negative |
| P01226 | NSCELTNITIAVEKEECGFC | Negative |
| P01226 | TNITIAVEKEECGFCISINT | Negative |
| P01226 | NITIAVEKEECGFCISINTT | Negative |

|        |                        |          |
|--------|------------------------|----------|
| P01226 | ITIAVEKEECGFCISINTTW   | Negative |
| P01226 | WKA VCCNSCEL TNITIAVEK | Negative |
| P01226 | SCEL TNITIAVEKEECGFCI  | Negative |
| P01226 | EL TNITIAVEKEECGFCISI  | Negative |
| P01226 | MKSVQFCFLFCCWKA VCCNS  | Negative |
| P01226 | CFLFCCWKA VCCNSCEL TNI | Negative |
| P01226 | CCWKA VCCNSCEL TNITIAV | Negative |
| P01226 | FCCWKA VCCNSCEL TNITIA | Negative |
| P01226 | KAVCCNSCEL TNITIAVEKE  | Negative |
| P01226 | LTNITIAVEKEECGFCISIN   | Negative |
| P01226 | QFCFLFCCWKA VCCNSCEL T | Negative |
| P01226 | CCNSCEL TNITIAVEKEECG  | Negative |
| P01226 | LFCCWKA VCCNSCEL TNITI | Negative |
| P01226 | CEL TNITIAVEKEECGFCIS  | Negative |
| P01226 | TIAVEKEECGFCISINTTWC   | Negative |
| P01226 | AVCCNSCEL TNITIAVEKEE  | Negative |
| P01226 | FLFCCWKA VCCNSCEL TNIT | Negative |
| P01226 | AVEKEECGFCISINTTWCAG   | Negative |
| P01226 | VEKEECGFCISINTTWCAGY   | Negative |
| P01226 | KSVQFCFLFCCWKA VCCNSC  | Negative |
| P01226 | CNSCEL TNITIAVEKEECGF  | Negative |
| P01226 | IAVEKEECGFCISINTTWCA   | Negative |
| P01226 | SVQFCFLFCCWKA VCCNSCE  | Negative |
| P01226 | VCCNSCEL TNITIAVEKEEC  | Negative |
| P01226 | CWKA VCCNSCEL TNITIAVE | Negative |
| P01226 | FCFLFCCWKA VCCNSCEL TN | Negative |
| P01227 | EL TNITITVEKEECSFCISI  | Negative |
| P01227 | TNITITVEKEECSFCISINT   | Negative |
| P01227 | LFCCWRAICCRSCEL TNITI  | Negative |
| P01227 | LTNITITVEKEECSFCISIN   | Negative |
| P01227 | ITITVEKEECSFCISINTTW   | Negative |
| P01227 | TITVEKEECSFCISINTTWC   | Negative |
| P01227 | MKSVQFCFLFCCWRAICCRS   | Negative |
| P01227 | AICCRSCEL TNITITVEKEE  | Negative |
| P01227 | RSCEL TNITITVEKEECSFC  | Negative |
| P01227 | KSVQFCFLFCCWRAICCRSC   | Negative |
| P01227 | CCWRAICCRSCEL TNITITV  | Negative |
| P01227 | FCFLFCCWRAICCRSCEL TN  | Negative |
| P01227 | CWRAICCRSCEL TNITITVE  | Negative |
| P01227 | ICCRSCEL TNITITVEKEEC  | Negative |
| P01227 | ITVEKEECSFCISINTTWCA   | Negative |
| P01227 | CFLFCCWRAICCRSCEL TNI  | Negative |
| P01227 | CRSCEL TNITITVEKEECSF  | Negative |
| P01227 | VEKEECSFCISINTTWCAGY   | Negative |
| P01227 | FCCWRAICCRSCEL TNITIT  | Negative |
| P01227 | WRAICCRSCEL TNITITVEK  | Negative |

|        |                      |          |
|--------|----------------------|----------|
| P01227 | SCELTNITITVEKEECSFCI | Negative |
| P01227 | NITITVEKEECSFCISINTT | Negative |
| P01227 | TVEKEECSFCISINTTWCAG | Negative |
| P01227 | CCRSCELTNITITVEKEECS | Negative |
| P01227 | CELTNITITVEKEECSFCIS | Negative |
| P01227 | SVQFCFLFCCWRAICCRSCE | Negative |
| P01227 | FLFCCWRAICCRSCELTNIT | Negative |
| P01227 | VQFCFLFCCWRAICCRSCEL | Negative |
| P01227 | RAICCRSCELTNITITVEKE | Negative |
| P01228 | NITITVEKEECNFCISINTT | Negative |
| P01228 | CCWKAICCNSELTNITITV  | Negative |
| P01228 | KAICCNSELTNITITVEKE  | Negative |
| P01228 | CELTNITITVEKEECNFCIS | Negative |
| P01228 | ITITVEKEECNFCISINTTW | Negative |
| P01228 | ICCNSELTNITITVEKEEC  | Negative |
| P01228 | AICCNSELTNITITVEKEE  | Negative |
| P01228 | ITVEKEECNFCISINTTWCA | Negative |
| P01228 | MKSLQFCFLFCCWKAICCN  | Negative |
| P01228 | CCNSELTNITITVEKEECN  | Negative |
| P01228 | WKAICCNSELTNITITVEK  | Negative |
| P01228 | TVEKEECNFCISINTTWCAG | Negative |
| P01228 | ELTNITITVEKEECNFCISI | Negative |
| P01228 | QFCFLFCCWKAICCNSELT  | Negative |
| P01228 | VEKEECNFCISINTTWCAGY | Negative |
| P01228 | FCCWKAICCNSELTNITIT  | Negative |
| P01228 | SCELTNITITVEKEECNFCI | Negative |
| P01228 | NSCELTNITITVEKEECNFC | Negative |
| P01228 | LQFCFLFCCWKAICCNSEL  | Negative |
| P01228 | CWKAICCNSELTNITITVE  | Negative |
| P01228 | SLQFCFLFCCWKAICCN    | Negative |
| P01228 | KSLQFCFLFCCWKAICCN   | Negative |
| P01228 | TNITITVEKEECNFCISINT | Negative |
| P01228 | CNSELTNITITVEKEECNF  | Negative |
| P01228 | CFLFCCWKAICCNSELTNI  | Negative |
| P01228 | LTNITITVEKEECNFCISIN | Negative |
| P01228 | LFCCWKAICCNSELTNITI  | Negative |
| P01228 | TITVEKEECNFCISINTTWC | Negative |
| P01228 | FLFCCWKAICCNSELTNIT  | Negative |
| P01229 | REPLRPWCHPINAILAVEKE | Negative |
| P01229 | MLQGLLLLLLLSMGGAWASR | Negative |
| P01229 | EPLRPWCHPINAILAVEKEG | Negative |
| P01229 | LLLLLSMGGAWASREPLRPW | Negative |
| P01229 | GAWASREPLRPWCHPINAIL | Negative |
| P01229 | LRPWCHPINAILAVEKEGCP | Negative |
| P01229 | SMGGAWASREPLRPWCHPIN | Negative |
| P01229 | MGGAWASREPLRPWCHPINA | Negative |

|        |                      |          |
|--------|----------------------|----------|
| P01229 | AWASREPLRPWCHPINAILA | Negative |
| P01229 | WASREPLRPWCHPINAILAV | Negative |
| P01229 | ASREPLRPWCHPINAILAVE | Negative |
| P01229 | LLLLLLSMGGAWASREPLR  | Negative |
| P01229 | SREPLRPWCHPINAILAVEK | Negative |
| P01229 | LLLSMGGAWASREPLRPWC  | Negative |
| P01229 | RPWCHPINAILAVEKEGCPV | Negative |
| P01229 | LLLLLLSMGGAWASREPLRP | Negative |
| P01229 | PLRPWCHPINAILAVEKEGC | Negative |
| P01229 | LLSMGGAWASREPLRPWCH  | Negative |
| P01229 | MEMLQGLLLLLLLSMGGAWA | Negative |
| P01229 | CHPINAILAVEKEGCPVCIT | Negative |
| P01229 | HPINAILAVEKEGCPVCITV | Negative |
| P01229 | PWCHPINAILAVEKEGCPVC | Negative |
| P01229 | LSMGGAWASREPLRPWCHPI | Negative |
| P01229 | GGAWASREPLRPWCHPINAI | Negative |
| P01229 | QGLLLLLLLSMGGAWASREP | Negative |
| P01229 | EMLQGLLLLLLLSMGGAWAS | Negative |
| P01229 | WCHPINAILAVEKEGCPVCI | Negative |
| P01229 | LQGLLLLLLLSMGGAWASRE | Negative |
| P01229 | LLSMGGAWASREPLRPWCHP | Negative |
| P01232 | WASRGPLRPLCRPINATLAA | Negative |
| P01232 | LQGLLLWLLSVAGVWASRG  | Negative |
| P01232 | GVWASRGPLRPLCRPINATL | Negative |
| P01232 | LLSVAGVWASRGPLRPLCRP | Negative |
| P01232 | SVAGVWASRGPLRPLCRPIN | Negative |
| P01232 | AGVWASRGPLRPLCRPINAT | Negative |
| P01232 | CRPINATLAAENEACPVCIT | Negative |
| P01232 | RGPLRPLCRPINATLAAENE | Negative |
| P01232 | SRGPLRPLCRPINATLAAEN | Negative |
| P01232 | LRPLCRPINATLAAENEACP | Negative |
| P01232 | ASRGPLRPLCRPINATLAAE | Negative |
| P01232 | RPLCRPINATLAAENEACPV | Negative |
| P01232 | LLSVAGVWASRGPLRPLCR  | Negative |
| P01232 | RPINATLAAENEACPVCITF | Negative |
| P01232 | MEMLQGLLLWLLSVAGVWA  | Negative |
| P01232 | EMLQGLLLWLLSVAGVWAS  | Negative |
| P01232 | LSVAGVWASRGPLRPLCRPI | Negative |
| P01232 | WLLSVAGVWASRGPLRPLC  | Negative |
| P01232 | VWASRGPLRPLCRPINATLA | Negative |
| P01232 | LLLWLLSVAGVWASRGPLR  | Negative |
| P01232 | PLRPLCRPINATLAAENEAC | Negative |
| P01232 | LWLLSVAGVWASRGPLRPL  | Negative |
| P01232 | LCRPINATLAAENEACPVC  | Negative |
| P01232 | VAGVWASRGPLRPLCRPINA | Negative |
| P01232 | LLWLLSVAGVWASRGPLRP  | Negative |



|        |                      |          |
|--------|----------------------|----------|
| P01232 | QGLLLWLLLSVAGVWASRGP | Negative |
| P01232 | PLCRPINATLAAENEACPVC | Negative |
| P01232 | MLQGLLLWLLLSVAGVWASR | Negative |
| P01232 | GPLRPLCRPINATLAAENEA | Negative |
| P01235 | VRNHILFSVVVLLAVAQSSY | Negative |
| P01235 | VAQSSYLPPCEPVNETVAVE | Negative |
| P01235 | FSVVVLLAVAQSSYLPPCEP | Negative |
| P01235 | LAVAQSSYLPPCEPVNETVA | Negative |
| P01235 | VLLAVAQSSYLPPCEPVNET | Negative |
| P01235 | NHILFSVVVLLAVAQSSYLP | Negative |
| P01235 | YLPPCEPVNETVAVEKEGCP | Negative |
| P01235 | VVLLAVAQSSYLPPCEPVNE | Negative |
| P01235 | SYLPPCEPVNETVAVEKEGC | Negative |
| P01235 | TPVKILVVRNHILFSVVVLL | Negative |
| P01235 | QSSYLPPCEPVNETVAVEKE | Negative |
| P01235 | MGTPVKILVVRNHILFSVVV | Negative |
| P01235 | GTPVKILVVRNHILFSVVVL | Negative |
| P01235 | VKILVVRNHILFSVVVLLAV | Negative |
| P01235 | SSYLPPCEPVNETVAVEKEG | Negative |
| P01235 | AVAQSSYLPPCEPVNETVAV | Negative |
| P01235 | ILFSVVVLLAVAQSSYLPPC | Negative |
| P01235 | LVVRNHILFSVVVLLAVAQS | Negative |
| P01235 | AQSSYLPPCEPVNETVAVEK | Negative |
| P01235 | SVVVLLAVAQSSYLPPCEPV | Negative |
| P01235 | KILVVRNHILFSVVVLLAVA | Negative |
| P01235 | LPPCEPVNETVAVEKEGCPK | Negative |
| P01235 | VVVLLAVAQSSYLPPCEPVN | Negative |
| P01235 | PVKILVVRNHILFSVVVLLA | Negative |
| P01235 | ILVVRNHILFSVVVLLAVAQ | Negative |
| P01235 | LLAVAQSSYLPPCEPVNETV | Negative |
| P01235 | LFSVVVLLAVAQSSYLPPCE | Negative |
| P01235 | RNHILFSVVVLLAVAQSSYL | Negative |
| P01235 | VVRNHILFSVVVLLAVAQSS | Negative |
| P01236 | PICPGGAARCQVTLRDLFDR | Negative |
| P01236 | QSVAPLPICPGGAARCQVTL | Negative |
| P01236 | GSPWKGSLLLLVSNLLLCQ  | Negative |
| P01236 | VAPLPICPGGAARCQVTLRD | Negative |
| P01236 | NLLLCQSVAPLPICPGGAAR | Negative |
| P01236 | PLPICPGGAARCQVTLRDLF | Negative |
| P01236 | WKGSLLLLVSNLLLCQSV   | Negative |
| P01236 | LCQSVAPLPICPGGAARCQV | Negative |
| P01236 | SPWKGSLLLLVSNLLLCQS  | Negative |
| P01236 | LLLLVSNLLLCQSVAPLPI  | Negative |
| P01236 | MNIKGSPWKGSLLLLVSNL  | Negative |
| P01236 | KGSLLLLVSNLLLCQSVAP  | Negative |
| P01236 | LLLCQSVAPLPICPGGAARC | Negative |

|        |                        |          |
|--------|------------------------|----------|
| P01236 | LLVSNLLLCQSVAPLPICPG   | Negative |
| P01236 | LLLLVSNLLLCQSVAPLPIC   | Negative |
| P01236 | GSLLLLLVSNLLLCQSVAPL   | Negative |
| P01236 | LVSNNLLCQSVAPLPICPGG   | Negative |
| P01236 | VSNLLLCQSVAPLPICPGGA   | Negative |
| P01236 | PWKGSLLLLLVSNLLLCQSV   | Negative |
| P01236 | SLLLLLVSNLLLCQSVAPLP   | Negative |
| P01236 | IKGSPWKGSLLLLLVSNLL    | Negative |
| P01236 | LPICPGGAARCQVTLRDLFD   | Negative |
| P01236 | KGSPWKGSLLLLLVSNLLC    | Negative |
| P01236 | LLCQSVAPLPICPGGAARCQ   | Negative |
| P01236 | APLPICPGGAARCQVTLRDL   | Negative |
| P01236 | SVAPLPICPGGAARCQVTLR   | Negative |
| P01236 | SNLLCQSVAPLPICPGGAA    | Negative |
| P01236 | NIKGSPWKGSLLLLLVSNLL   | Negative |
| P01236 | CQSVAPLPICPGGAARCQVT   | Negative |
| P01237 | SARKAGTLLLLMMSNLLFCQ   | Negative |
| P01237 | GTLMLMMSNLLFCQNVQTL    | Negative |
| P01237 | RKAGTLLLLMMSNLLFCQNV   | Negative |
| P01237 | LLMMSNLLFCQNVQTL PVC   | Negative |
| P01237 | NSQVSARKAGTLLLLMMSN    | Negative |
| P01237 | QTL PVCSSGDCQTPLELFD   | Negative |
| P01237 | LFCQNVQTL PVCSSGDCQTP  | Negative |
| P01237 | LLFCQNVQTL PVCSSGDCQT  | Negative |
| P01237 | LPVCSSGDCQTPLELFD RV   | Negative |
| P01237 | NLLFCQNVQTL PVCSSGDCQ  | Negative |
| P01237 | CQNVQTL PVCSSGDCQTPLP  | Negative |
| P01237 | LMMSNLLFCQNVQTL PVCSSG | Negative |
| P01237 | QVSARKAGTLLLLMMSNLLF   | Negative |
| P01237 | TLLLLMMSNLLFCQNVQTL P  | Negative |
| P01237 | MSNLLFCQNVQTL PVCSSGD  | Negative |
| P01237 | SNLLFCQNVQTL PVCSSGDC  | Negative |
| P01237 | KAGTLLLLMMSNLLFCQNVQ   | Negative |
| P01237 | VSARKAGTLLLLMMSNLLFC   | Negative |
| P01237 | VQTL PVCSSGDCQTPLEL F  | Negative |
| P01237 | TLPVCSSGDCQTPLEL FDR   | Negative |
| P01237 | MNSQVSARKAGTLLLLMMSN   | Negative |
| P01237 | MMSNLLFCQNVQTL PVCSSG  | Negative |
| P01237 | AGTLLLLMMSNLLFCQNVQT   | Negative |
| P01237 | SQVSARKAGTLLLLMMSNLL   | Negative |
| P01237 | FCQNVQTL PVCSSGDCQTPL  | Negative |
| P01237 | NVQTL PVCSSGDCQTPLEL   | Negative |
| P01237 | LLLLMMSNLLFCQNVQTL PV  | Negative |
| P01237 | QNVQTL PVCSSGDCQTPLE   | Negative |
| P01237 | ARKAGTLLLLMMSNLLFCQN   | Negative |
| P01238 | MDNRGSSQKGSLLLLLLVS    | Negative |

|        |                       |          |
|--------|-----------------------|----------|
| P01238 | NRGSSQKGSLLLLLLLVSNL  | Negative |
| P01238 | QKGSLLLLLLLVSNLFLCKS  | Negative |
| P01238 | LLLLLLLVSNLFLCKSVASL  | Negative |
| P01238 | KGSLLLLLLLVSNLFLCKSV  | Negative |
| P01238 | RGSSQKGSLLLLLLLVSNLF  | Negative |
| P01238 | GSSQKGSLLLLLLLVSNLFL  | Negative |
| P01238 | GSLLLLLLLVSNLFLCKSVA  | Negative |
| P01238 | VASLPICPSGAVNCQVSLRD  | Negative |
| P01238 | DNRGSSQKGSLLLLLLLVS   | Negative |
| P01238 | NLFLCKSVASLPICPSGAVN  | Negative |
| P01238 | LVSNLFLCKSVASLPICPSG  | Negative |
| P01238 | SVASLPICPSGAVNCQVSLR  | Negative |
| P01238 | SQKGSLLLLLLLVSNLFLCK  | Negative |
| P01238 | LLLLVSNLFLCKSVASLPIC  | Negative |
| P01238 | SLLLLLLLVSNLFLCKSVAS  | Negative |
| P01238 | LLVSNLFLCKSVASLPICPS  | Negative |
| P01238 | LCKSVASLPICPSGAVNCQV  | Negative |
| P01238 | VSNLFLCKSVASLPICPSGA  | Negative |
| P01238 | SSQKGSLLLLLLLVSNLFLC  | Negative |
| P01238 | ASLPICPSGAVNCQVSLRDL  | Negative |
| P01238 | KSVASLPICPSGAVNCQVSL  | Negative |
| P01238 | SNLFLCKSVASLPICPSGAV  | Negative |
| P01238 | CKSVASLPICPSGAVNCQVS  | Negative |
| P01238 | LLLLLVSNLFLCKSVASLP   | Negative |
| P01238 | LLLLLVSNLFLCKSVASLPI  | Negative |
| P01238 | LFLCKSVASLPICPSGAVNC  | Negative |
| P01238 | FLCKSVASLPICPSGAVNCQ  | Negative |
| P01238 | SLPICPSGAVNCQVSLRDLF  | Negative |
| P01239 | NLLLCQGVVSTPVCPNGPGN  | Negative |
| P01239 | CQGVVSTPVCPNGPGNCQVS  | Negative |
| P01239 | DSKGSSQKGSRLLLLLVVS   | Negative |
| P01239 | LVVSNLLLCQGVVSTPVCN   | Negative |
| P01239 | GVVSTPVCPNGPGNCQVSLR  | Negative |
| P01239 | LLLVSNSLLLCQGVVSTPV   | Negative |
| P01239 | KGSRLLLLLVVSNSLLLCQGV | Negative |
| P01239 | SSQKGSRLLLLLVVSNSLLC  | Negative |
| P01239 | LLLLLVSNLLLCQGVVSTP   | Negative |
| P01239 | LLLCQGVVSTPVCPNGPGNC  | Negative |
| P01239 | LLCQGVVSTPVCPNGPGNCQ  | Negative |
| P01239 | QKGSRLLLLLVVSNSLLLCQ  | Negative |
| P01239 | SRLLLLLVVSNSLLLCQGVVS | Negative |
| P01239 | VVSNSLLLCQGVVSTPVCN   | Negative |
| P01239 | SQKGSRLLLLLVVSNSLLCQ  | Negative |
| P01239 | SNLLLCQGVVSTPVCNPGPG  | Negative |
| P01239 | QGVVSTPVCPNGPGNCQVSL  | Negative |
| P01239 | LCQGVVSTPVCPNGPGNCQV  | Negative |

|        |                       |          |
|--------|-----------------------|----------|
| P01239 | GSSQKGSRLLLLLVVSNNLL  | Negative |
| P01239 | LLLVVSNNLLCQGVVSTPVC  | Negative |
| P01239 | RLLLLLVVSNNLLCQGVVST  | Negative |
| P01239 | GSRLLLLLVVSNNLLCQGVV  | Negative |
| P01239 | KGSSQKGSRLLLLLVVSNNL  | Negative |
| P01239 | MDSKGSSQKGSRLLLLLVVS  | Negative |
| P01239 | VVSTPVCPNGPGNCQVSLRD  | Negative |
| P01239 | STPVCPNGPGNCQVSLRDLF  | Negative |
| P01239 | VSNLLLCQGVVSTPVCPNGP  | Negative |
| P01239 | SKGSSQKGSRLLLLLVVSNNL | Negative |
| P01239 | VSTPVCPNGPGNCQVSLRDL  | Negative |
| P01241 | ATGSRTSLLLAFGLLCLPWL  | Negative |
| P01241 | CLPWLQEGSAFPTIPLSRLF  | Negative |
| P01241 | LQEGSAFPTIPLSRLFDNAM  | Negative |
| P01241 | GLLCLPWLQEGSAFPTIPLS  | Negative |
| P01241 | PTIPLSRLFDNAMLRHRLH   | Negative |
| P01241 | FPTIPLSRLFDNAMLRHRL   | Negative |
| P01241 | GSRTSLLLAFGLLCLPWLQE  | Negative |
| P01241 | LLCLPWLQEGSAFPTIPLSR  | Negative |
| P01241 | LLAFGLLCLPWLQEGSAFPT  | Negative |
| P01241 | IPLSRLFDNAMLRHRLHQL   | Negative |
| P01241 | EGSAFPTIPLSRLFDNAMLR  | Negative |
| P01241 | PWLQEGSAFPTIPLSRLFDN  | Negative |
| P01241 | TIPLSRLFDNAMLRHRLHQ   | Negative |
| P01241 | LLAFGLLCLPWLQEGSAFP   | Negative |
| P01241 | SAFPTIPLSRLFDNAMLRH   | Negative |
| P01241 | SLLAFGLLCLPWLQEGSAF   | Negative |
| P01241 | WLQEGSAFPTIPLSRLFDNA  | Negative |
| P01241 | TSLLAFGLLCLPWLQEGSA   | Negative |
| P01241 | FGLLCLPWLQEGSAFPTIPL  | Negative |
| P01241 | RTSLLAFGLLCLPWLQEGS   | Negative |
| P01241 | LPWLQEGSAFPTIPLSRLFD  | Negative |
| P01241 | LCLPWLQEGSAFPTIPLSRL  | Negative |
| P01241 | LAFGLLCLPWLQEGSAFPTI  | Negative |
| P01241 | QEGSAFPTIPLSRLFDNAML  | Negative |
| P01241 | GSAFPTIPLSRLFDNAMLRA  | Negative |
| P01241 | SRTSLLAFGLLCLPWLQEG   | Negative |
| P01241 | TGSRTSLLAFGLLCLPWLQ   | Negative |
| P01241 | AFPTIPLSRLFDNAMLRHR   | Negative |
| P01241 | MATGSRTSLLAFGLLCLPW   | Negative |
| P01242 | SWLQEGSAFPTIPLSRLFDN  | Negative |
| P01242 | TSLLAFGLLCLSWLQEGSA   | Negative |
| P01242 | SAFPTIPLSRLFDNAMLRAR  | Negative |
| P01242 | EGSAFPTIPLSRLFDNAMLR  | Negative |
| P01242 | MAAGSRTSLLAFGLLCLSW   | Negative |
| P01242 | LQEGSAFPTIPLSRLFDNAM  | Negative |

|        |                      |          |
|--------|----------------------|----------|
| P01242 | AAGSRTSLLLAFGLLCLSWL | Negative |
| P01242 | FGLLCLSWLQEGSAFPTIPL | Negative |
| P01242 | GLLCLSWLQEGSAFPTIPLS | Negative |
| P01242 | SLLLAFGLLCLSWLQEGSAF | Negative |
| P01242 | QEGSAFPTIPLSRLFDNAML | Negative |
| P01242 | IPLSRLFDNAMLRRRLYQL  | Negative |
| P01242 | LLCLSWLQEGSAFPTIPLSR | Negative |
| P01242 | LLLAFGLLCLSWLQEGSAFP | Negative |
| P01242 | PTIPLSRLFDNAMLRRRLY  | Negative |
| P01242 | LCLSWLQEGSAFPTIPLSRL | Negative |
| P01242 | FPTIPLSRLFDNAMLRRRL  | Negative |
| P01242 | GSAFPTIPLSRLFDNAMLRA | Negative |
| P01242 | AFPTIPLSRLFDNAMLRRR  | Negative |
| P01242 | CLSWLQEGSAFPTIPLSRLF | Negative |
| P01242 | WLQEGSAFPTIPLSRLFDNA | Negative |
| P01242 | AGSRTSLLLAFGLLCLSWLQ | Negative |
| P01242 | LAFGLLCLSWLQEGSAFPTI | Negative |
| P01242 | LLAFGLLCLSWLQEGSAFPT | Negative |
| P01242 | SRTSLLLAFGLLCLSWLQEG | Negative |
| P01242 | TIPLSRLFDNAMLRRRLYQ  | Negative |
| P01242 | GSRTSLLLAFGLLCLSWLQE | Negative |
| P01242 | RTSLLLAFGLLCLSWLQEGS | Negative |
| P01242 | LSWLQEGSAFPTIPLSRLFD | Negative |
| P01245 | PWPQDVGAFPAMPLSSLFAN | Negative |
| P01245 | DVGAFPAMPLSSLFANAVLR | Negative |
| P01245 | LLCLPWPQDVGAFPAMPLSS | Negative |
| P01245 | CLPWPQDVGAFPAMPLSSLF | Negative |
| P01245 | AGPRTSVLLAFGLLCLPWPQ | Negative |
| P01245 | RTSVLLAFGLLCLPWPQDVG | Negative |
| P01245 | LPWPQDVGAFPAMPLSSLFA | Negative |
| P01245 | PRTSVLLAFGLLCLPWPQDV | Negative |
| P01245 | WPQDVGAFPAMPLSSLFANA | Negative |
| P01245 | GPRTSVLLAFGLLCLPWPQD | Negative |
| P01245 | VGAFPAMPLSSLFANAVLRA | Negative |
| P01245 | SVLLAFGLLCLPWPQDVGA  | Negative |
| P01245 | MPLSSLFANAVLRAQHLHQL | Negative |
| P01245 | AAGPRTSVLLAFGLLCLPWP | Negative |
| P01245 | GAFPAMPLSSLFANAVLRAQ | Negative |
| P01245 | TSVLLAFGLLCLPWPQDVGA | Negative |
| P01245 | PQDVGAFPAMPLSSLFANAV | Negative |
| P01245 | VLLAFGLLCLPWPQDVGA   | Negative |
| P01245 | AMPLSSLFANAVLRAQHLHQ | Negative |
| P01245 | PAMPLSSLFANAVLRAQHLH | Negative |
| P01245 | MAAGPRTSVLLAFGLLCLPW | Negative |
| P01245 | AFPAMPLSSLFANAVLRAQH | Negative |
| P01245 | GLLCLPWPQDVGAFPAMPLS | Negative |

|        |                       |          |
|--------|-----------------------|----------|
| P01245 | QDVGAFFPAMPLSSLFANAVL | Negative |
| P01245 | LCLPWPQDVGAFFPAMPLSSL | Negative |
| P01245 | FPAMPLSSLFANAVLRAQHL  | Negative |
| P01245 | LAFGLLCLPWPQDVGAFFPAM | Negative |
| P01245 | FGLLCLPWPQDVGAFFAMPL  | Negative |
| P01245 | LLAFGLLCLPWPQDVGAFFPA | Negative |
| P01246 | AAGPRTSLLAFALLCLPWT   | Negative |
| P01246 | FALLCLPWTQVVGAFPAMSL  | Negative |
| P01246 | GPRTSLLAFALLCLPWTQV   | Negative |
| P01246 | AGPRTSLLAFALLCLPWTQ   | Negative |
| P01246 | GAFPAMSLSGLFANAVLRAQ  | Negative |
| P01246 | VGAFFAMSLSGLFANAVLRA  | Negative |
| P01246 | PWTQVVGAFPAMSLSGLFAN  | Negative |
| P01246 | AMSLSGLFANAVLRAQHLHQ  | Negative |
| P01246 | LLCLPWTQVVGAFPAMSLSG  | Negative |
| P01246 | VVGAFPAMSLSGLFANAVLR  | Negative |
| P01246 | TQVVGAFPAMSLSGLFANAV  | Negative |
| P01246 | MMAAGPRTSLLAFALLCLP   | Negative |
| P01246 | FPAMSLSGLFANAVLRAQHL  | Negative |
| P01246 | AFPAMSLSGLFANAVLRAQH  | Negative |
| P01246 | PRTSLLAFALLCLPWTQVV   | Negative |
| P01246 | MAAGPRTSLLAFALLCLPW   | Negative |
| P01246 | LLAFALLCLPWTQVVGAFPA  | Negative |
| P01246 | ALLCLPWTQVVGAFPAMSLS  | Negative |
| P01246 | TSLLAFALLCLPWTQVVG    | Negative |
| P01246 | QVVGAFPAMSLSGLFANAVL  | Negative |
| P01246 | AFALLCLPWTQVVGAFPAMS  | Negative |
| P01246 | LLAFALLCLPWTQVVGAFP   | Negative |
| P01246 | CLPWTQVVGAFPAMSLSGLF  | Negative |
| P01246 | WTQVVGAFPAMSLSGLFANA  | Negative |
| P01246 | LPWTQVVGAFPAMSLSGLFA  | Negative |
| P01246 | LCLPWTQVVGAFPAMSLSGL  | Negative |
| P01246 | RTSLLAFALLCLPWTQVVG   | Negative |
| P01246 | SLLAFALLCLPWTQVVGAF   | Negative |
| P01246 | PAMSLSGLFANAVLRAQHLH  | Negative |
| P01248 | ALLCLPWTREVGAFPAMPLS  | Negative |
| P01248 | LLCLPWTREVGAFPAMPLSS  | Negative |
| P01248 | FPAMPLSSLFANAVLRAQHL  | Negative |
| P01248 | AAGPRTSALLAFALLCLPWT  | Negative |
| P01248 | MPLSSLFANAVLRAQHLHQL  | Negative |
| P01248 | CLPWTREVGAFPAMPLSSLF  | Negative |
| P01248 | AMPLSSLFANAVLRAQHLHQ  | Negative |
| P01248 | FALLCLPWTREVGAFPAMPL  | Negative |
| P01248 | PRTSALLAFALLCLPWTREV  | Negative |
| P01248 | LPWTREVGAFPAMPLSSLFA  | Negative |
| P01248 | VGAFFAMPLSSLFANAVLRA  | Negative |

|        |                      |          |
|--------|----------------------|----------|
| P01248 | TREVGAFPAMPLSSLFANAV | Negative |
| P01248 | GPRTSALLAFALLCLPWTR  | Negative |
| P01248 | WTREVGAFPAMPLSSLFANA | Negative |
| P01248 | PWTREVGAFPAMPLSSLFAN | Negative |
| P01248 | GAFPAMPLSSLFANAVLRAQ | Negative |
| P01248 | SALLAFALLCLPWTR      | Negative |
| P01248 | MAAGPRTSALLAFALLCLPW | Negative |
| P01248 | TSALLAFALLCLPWTR     | Negative |
| P01248 | AFPAMPLSSLFANAVLRAQH | Negative |
| P01248 | AGPRTSALLAFALLCLPWTR | Negative |
| P01248 | EVGAFPAMPLSSLFANAVLR | Negative |
| P01248 | LCLPWTR              | Negative |
| P01248 | RTSALLAFALLCLPWTR    | Negative |
| P01248 | PAMPLSSLFANAVLRAQHLH | Negative |
| P01248 | ALLAFALLCLPWTR       | Negative |
| P01248 | REVGAFPAMPLSSLFANAVL | Negative |
| P01248 | LAFALLCLPWTR         | Negative |
| P01248 | LLAFALLCLPWTR        | Negative |
| P01268 | KKRAVSEIQFMHNLGKHLSS | Negative |
| P01268 | SVKKRAVSEIQFMHNLGKHL | Negative |
| P01268 | AKDMVKVMIVMLAICFLARS | Negative |
| P01268 | KVMIVMLAICFLARSDGKSV | Negative |
| P01268 | ICFLARSDGKSVKKRAVSEI | Negative |
| P01268 | VMIVMLAICFLARSDGKSVK | Negative |
| P01268 | GKSVKKRAVSEIQFMHNLGK | Negative |
| P01268 | MSAKDMVKVMIVMLAICFLA | Negative |
| P01268 | MMSAKDMVKVMIVMLAICFL | Negative |
| P01268 | CFLARSDGKSVKKRAVSEIQ | Negative |
| P01268 | FLARSDGKSVKKRAVSEIQF | Negative |
| P01268 | SDGKSVKKRAVSEIQFMHNL | Negative |
| P01268 | VMLAICFLARSDGKSVKKRA | Negative |
| P01268 | KSVKKRAVSEIQFMHNLGKH | Negative |
| P01268 | KDMVKVMIVMLAICFLARSD | Negative |
| P01268 | RSDGKSVKKRAVSEIQFMHN | Negative |
| P01268 | VKVMIVMLAICFLARSDGKS | Negative |
| P01268 | MLAICFLARSDGKSVKKRAV | Negative |
| P01268 | DGKSVKKRAVSEIQFMHNLG | Negative |
| P01268 | VKKRAVSEIQFMHNLGKHL  | Negative |
| P01268 | SAKDMVKVMIVMLAICFLAR | Negative |
| P01268 | AICFLARSDGKSVKKRAVSE | Negative |
| P01268 | LAICFLARSDGKSVKKRAVS | Negative |
| P01268 | MVKVMIVMLAICFLARSDGK | Negative |
| P01268 | KRAVSEIQFMHNLGKHLSSM | Negative |
| P01268 | DMVKVMIVMLAICFLARSDG | Negative |
| P01268 | IVMLAICFLARSDGKSVKKR | Negative |
| P01268 | LARSDGKSVKKRAVSEIQFM | Negative |

|        |                      |          |
|--------|----------------------|----------|
| P01268 | ARSDGKSVKKRAVSEIQFMH | Negative |
| P01269 | IKKRSVSEIQLMHNLGKHL  | Negative |
| P01269 | TVKVMVVMLAICFLARSDGK | Negative |
| P01269 | VMLAICFLARSDGKPIKKRS | Negative |
| P01269 | GKPIKKRSVSEIQLMHNLGK | Negative |
| P01269 | PIKKRSVSEIQLMHNLGKHL | Negative |
| P01269 | ARSDGKPIKKRSVSEIQLMH | Negative |
| P01269 | KPIKKRSVSEIQLMHNLGKH | Negative |
| P01269 | KKRSVSEIQLMHNLGKHLSS | Negative |
| P01269 | KRSVSEIQLMHNLGKHLSSL | Negative |
| P01269 | FLARSDGKPIKKRSVSEIQL | Negative |
| P01269 | DTVKVMVVMLAICFLARSDG | Negative |
| P01269 | AKDTVKVMVVMLAICFLARS | Negative |
| P01269 | AICFLARSDGKPIKKRSVSE | Negative |
| P01269 | LARSDGKPIKKRSVSEIQLM | Negative |
| P01269 | CFLARSDGKPIKKRSVSEIQ | Negative |
| P01269 | SDGKPIKKRSVSEIQLMHN  | Negative |
| P01269 | KDTVKVMVVMLAICFLARSD | Negative |
| P01269 | KVMVVMLAICFLARSDGKPI | Negative |
| P01269 | DGKPIKKRSVSEIQLMHNLG | Negative |
| P01269 | VKVMVVMLAICFLARSDGKP | Negative |
| P01269 | MMSAKDTVKVMVVMLAICFL | Negative |
| P01269 | MSAKDTVKVMVVMLAICFLA | Negative |
| P01269 | LAICFLARSDGKPIKKRSVS | Negative |
| P01269 | ICFLARSDGKPIKKRSVSEI | Negative |
| P01269 | MLAICFLARSDGKPIKKRSV | Negative |
| P01269 | VVMLAICFLARSDGKPIKKR | Negative |
| P01269 | RSDGKPIKKRSVSEIQLMHN | Negative |
| P01269 | SAKDTVKVMVVMLAICFLAR | Negative |
| P01269 | VMVVMLAICFLARSDGKPIK | Negative |
| P01270 | VKKRSVSEIQLMHNLGKHLN | Negative |
| P01270 | PAKDMAKVMIVMLAICFLTK | Negative |
| P01270 | DGKSVKKRSVSEIQLMHNLG | Negative |
| P01270 | LTKSDGKSVKKRSVSEIQLM | Negative |
| P01270 | DMAKVMIVMLAICFLTKSDG | Negative |
| P01270 | ICFLTKSDGKSVKKRSVSEI | Negative |
| P01270 | AKVMIVMLAICFLTKSDGKS | Negative |
| P01270 | MLAICFLTKSDGKSVKKRSV | Negative |
| P01270 | IPAKDMAKVMIVMLAICFLT | Negative |
| P01270 | KDMAKVMIVMLAICFLTKSD | Negative |
| P01270 | CFLTKSDGKSVKKRSVSEIQ | Negative |
| P01270 | KRSVSEIQLMHNLGKHLNSM | Negative |
| P01270 | IVMLAICFLTKSDGKSVKKR | Negative |
| P01270 | LAICFLTKSDGKSVKKRSVS | Negative |
| P01270 | AKDMAKVMIVMLAICFLTKS | Negative |
| P01270 | GKSVKKRSVSEIQLMHNLGK | Negative |



|        |                          |          |
|--------|--------------------------|----------|
| P01270 | KVMIVMLAICFLTKSDGKSV     | Negative |
| P01270 | KKRSVSEIQLMHNLGKHLNS     | Negative |
| P01270 | TKSDGKSVKKRSVSEIQLMH     | Negative |
| P01270 | VMLAICFLTKSDGKSVKKRS     | Negative |
| P01270 | VMIVMLAICFLTKSDGKSVK     | Negative |
| P01270 | SDGKSVKKRSVSEIQLMHNL     | Negative |
| P01270 | MIPAKDMAKVMIVMLAICFL     | Negative |
| P01270 | FLTKSDGKSVKKRSVSEIQL     | Negative |
| P01270 | AICFLTKSDGKSVKKRSVSE     | Negative |
| P01270 | MAKVMIVMLAICFLTKSDGK     | Negative |
| P01270 | SVKKRSVSEIQLMHNLGKHL     | Negative |
| P01270 | KSDGKSVKKRSVSEIQLMHN     | Negative |
| P01270 | KSVKKRSVSEIQLMHNLGKH     | Negative |
| P01274 | SWQRS LQNT EEKSR SFPAPQ  | Negative |
| P01274 | GLFVMLVQGSWQRS LQNT EE   | Negative |
| P01274 | RSLQNT EEKSR SFPAPQTD P  | Negative |
| P01274 | FVMLVQGSWQRS LQNT EEKS   | Negative |
| P01274 | VQGSWQRS LQNT EEKSR SFP  | Negative |
| P01274 | NTE EKSR SFPAPQTD PLDD P | Negative |
| P01274 | SLQNT EEKSR SFPAPQTD PL  | Negative |
| P01274 | KTIYFVAGLFVMLVQGSWQR     | Negative |
| P01274 | SRSFPAPQTD PLDDPDQMT E   | Negative |
| P01274 | MKTIYFVAGLFVMLVQGSWQ     | Negative |
| P01274 | LQNT EEKSR SFPAPQTD PLD  | Negative |
| P01274 | IYFVAGLFVMLVQGSWQRS L    | Negative |
| P01274 | VAGLFVMLVQGSWQRS LQNT    | Negative |
| P01274 | QRS LQNT EEKSR SFPAPQTD  | Negative |
| P01274 | GSWQRS LQNT EEKSR SFPAP  | Negative |
| P01274 | EEKSR SFPAPQTD PLDDPDQ   | Negative |
| P01274 | QGSWQRS LQNT EEKSR SFP A | Negative |
| P01274 | KSR SFPAPQTD PLDDPDQMT   | Negative |
| P01274 | AGLFVMLVQGSWQRS LQNT E   | Negative |
| P01274 | TIYFVAGLFVMLVQGSWQRS     | Negative |
| P01274 | VMLVQGSWQRS LQNT EEKSR   | Negative |
| P01274 | WQRS LQNT EEKSR SFPAPQT  | Negative |
| P01274 | YFVAGLFVMLVQGSWQRS LQ    | Negative |
| P01274 | LFVMLVQGSWQRS LQNT EEK   | Negative |
| P01274 | QNT EEKSR SFPAPQTD PLDD  | Negative |
| P01274 | LVQGSWQRS LQNT EEKSR SF  | Negative |
| P01274 | MLVQGSWQRS LQNT EEKSR S  | Negative |
| P01274 | TE EKSR SFPAPQTD PLDDPD  | Negative |
| P01274 | EKSR SFPAPQTD PLDDPDQM   | Negative |
| P01299 | CVALLLPPLGTRGAPLEPV      | Negative |
| P01299 | RCLFLLLLSACVALLLPPL      | Negative |
| P01299 | AACRCLFLLLLSACVALLLQ     | Negative |
| P01299 | CRCLFLLLLSACVALLLQPP     | Negative |

|        |                       |          |
|--------|-----------------------|----------|
| P01299 | LLQPPLGTRGAPLEPVYPGD  | Negative |
| P01299 | ALLLQPPLGTRGAPLEPVYP  | Negative |
| P01299 | PLGTRGAPLEPVYPGDDATP  | Negative |
| P01299 | PAACRCLFLLLLSACVALLL  | Negative |
| P01299 | QPPLGTRGAPLEPVYPGDDA  | Negative |
| P01299 | SACVALLLQPPLGTRGAPLE  | Negative |
| P01299 | APLEPVYPGDDATPEQMAQY  | Negative |
| P01299 | RGAPLEPVYPGDDATPEQMA  | Negative |
| P01299 | LGTRGAPLEPVYPGDDATPE  | Negative |
| P01299 | LLSACVALLLQPPLGTRGAP  | Negative |
| P01299 | FLLLLSACVALLLQPPLGTR  | Negative |
| P01299 | LQPPLGTRGAPLEPVYPGDD  | Negative |
| P01299 | LSACVALLLQPPLGTRGAPL  | Negative |
| P01299 | GAPLEPVYPGDDATPEQMAQ  | Negative |
| P01299 | LFLLLSACVALLLQPPLGT   | Negative |
| P01299 | LLLLSACVALLLQPPLGTRG  | Negative |
| P01299 | LLLLSACVALLLQPPLGTRGA | Negative |
| P01299 | TRGAPLEPVYPGDDATPEQM  | Negative |
| P01299 | MPAACRCLFLLLLSACVALL  | Negative |
| P01299 | LLLQPPLGTRGAPLEPVYPG  | Negative |
| P01299 | CLFLLLLSACVALLLQPPLG  | Negative |
| P01299 | ACRCLFLLLLSACVALLLQP  | Negative |
| P01299 | GTRGAPLEPVYPGDDATPEQ  | Negative |
| P01299 | VALLLQPPLGTRGAPLEPVY  | Negative |
| P01299 | PPLGTRGAPLEPVYPGDDAT  | Negative |
| P01301 | ASLEPEYPGDNATPEQMAQY  | Negative |
| P01301 | QPPLGALGASLEPEYPGDNA  | Negative |
| P01301 | PLGALGASLEPEYPGDNATP  | Negative |
| P01301 | EYPGDNATPEQMAQYAAELR  | Negative |
| P01301 | SLEPEYPGDNATPEQMAQYA  | Negative |
| P01301 | PGDNATPEQMAQYAAELRRY  | Negative |
| P01301 | ALLLQPPLGALGASLEPEYP  | Negative |
| P01301 | LEPEYPGDNATPEQMAQYAA  | Negative |
| P01301 | LLQPPLGALGASLEPEYPGD  | Negative |
| P01301 | ALGASLEPEYPGDNATPEQM  | Negative |
| P01301 | LGASLEPEYPGDNATPEQMA  | Negative |
| P01301 | STCVALLLQPPLGALGASLE  | Negative |
| P01301 | PPLGALGASLEPEYPGDNAT  | Negative |
| P01301 | GASLEPEYPGDNATPEQMAQ  | Negative |
| P01301 | GALGASLEPEYPGDNATPEQ  | Negative |
| P01301 | LLLQPPLGALGASLEPEYPG  | Negative |
| P01301 | LLSTCVALLLQPPLGALGAS  | Negative |
| P01301 | LGALGASLEPEYPGDNATPE  | Negative |
| P01301 | DNATPEQMAQYAAELRRYIN  | Negative |
| P01301 | VALLLQPPLGALGASLEPEY  | Negative |
| P01301 | CVALLLQPPLGALGASLEPE  | Negative |

|        |                      |          |
|--------|----------------------|----------|
| P01301 | PEYPGDNATPEQMAQYAAEL | Negative |
| P01301 | LLLSTCVALLLQPPLGALGA | Negative |
| P01301 | YPGDNATPEQMAQYAAELRR | Negative |
| P01301 | LSTCVALLLQPPLGALGASL | Negative |
| P01301 | NATPEQMAQYAAELRRYINM | Negative |
| P01301 | GDNATPEQMAQYAAELRRYI | Negative |
| P01301 | EPEYPGDNATPEQMAQYAAE | Negative |
| P01301 | LQPPLGALGASLEPEYPGDN | Negative |
| P01302 | QPPLGALGAPLEPEYPGDNA | Negative |
| P01302 | GAPLEPEYPGDNATPEQMAQ | Negative |
| P01302 | LSTCVALLLQPPLGALGAPL | Negative |
| P01302 | HRCLFLLLLSTCVALLLQPP | Negative |
| P01302 | LLSTCVALLLQPPLGALGAP | Negative |
| P01302 | LFLLLLSTCVALLLQPPLGA | Negative |
| P01302 | ALLLQPPLGALGAPLEPEYP | Negative |
| P01302 | LLLQPPLGALGAPLEPEYPG | Negative |
| P01302 | PPLGALGAPLEPEYPGDNAT | Negative |
| P01302 | AAHRCLFLLLLSTCVALLLQ | Negative |
| P01302 | CLFLLLLSTCVALLLQPPLG | Negative |
| P01302 | LGAPLEPEYPGDNATPEQMA | Negative |
| P01302 | LLLSTCVALLLQPPLGALGA | Negative |
| P01302 | LGALGAPLEPEYPGDNATPE | Negative |
| P01302 | LLLSTCVALLLQPPLGALG  | Negative |
| P01302 | AAHRCLFLLLLSTCVALLL  | Negative |
| P01302 | FLLLLSTCVALLLQPPLGAL | Negative |
| P01302 | LQPPLGALGAPLEPEYPGDN | Negative |
| P01302 | PLGALGAPLEPEYPGDNATP | Negative |
| P01302 | ALGAPLEPEYPGDNATPEQM | Negative |
| P01302 | RCLFLLLLSTCVALLLQPPL | Negative |
| P01302 | AHRCLFLLLLSTCVALLLQP | Negative |
| P01302 | VALLLQPPLGALGAPLEPEY | Negative |
| P01302 | GALGAPLEPEYPGDNATPEQ | Negative |
| P01302 | LLQPPLGALGAPLEPEYPGD | Negative |
| P01302 | MAAAHRCLFLLLLSTCVALL | Negative |
| P01302 | CVALLLQPPLGALGAPLEPE | Negative |
| P01302 | STCVALLLQPPLGALGAPLE | Negative |
| P01302 | APLEPEYPGDNATPEQMAQY | Negative |
| P01303 | VCLGALAEAYPSKPDNPGED | Negative |
| P01303 | LTLALSLLVCLGALAEAYPS | Negative |
| P01303 | LAEAYPSKPDNPGEDAPAED | Negative |
| P01303 | LSLLVCLGALAEAYPSKPDN | Negative |
| P01303 | CLGALAEAYPSKPDNPGEDA | Negative |
| P01303 | EAYPSKPDNPGEDAPAEDMA | Negative |
| P01303 | ALSLLVCLGALAEAYPSKPD | Negative |
| P01303 | AEAYPSKPDNPGEDAPAEDM | Negative |
| P01303 | LGALAEAYPSKPDNPGEDAP | Negative |

|        |                      |          |
|--------|----------------------|----------|
| P01303 | KRLGLSGLTLALSLLVCLGA | Negative |
| P01303 | GNKRLGLSGLTLALSLLVCL | Negative |
| P01303 | LLVCLGALAEAYPSKPDNPG | Negative |
| P01303 | AYPSKPDNPGEDAPAEDMAR | Negative |
| P01303 | YPSKPDNPGEDAPAEDMARY | Negative |
| P01303 | PSKPDNPGEDAPAEDMARYY | Negative |
| P01303 | TLALSLLVCLGALAEAYPSK | Negative |
| P01303 | GLSGLTLALSLLVCLGALAE | Negative |
| P01303 | GALAEAYPSKPDNPGEDAPA | Negative |
| P01303 | GLTLALSLLVCLGALAEAYP | Negative |
| P01303 | SLLVCLGALAEAYPSKPDNP | Negative |
| P01303 | LGLSGLTLALSLLVCLGALA | Negative |
| P01303 | RLGLSGLTLALSLLVCLGAL | Negative |
| P01303 | MLGNKRLGLSGLTLALSLLV | Negative |
| P01303 | NKRLGLSGLTLALSLLVCLG | Negative |
| P01303 | LGNKRLGLSGLTLALSLLVC | Negative |
| P01303 | LVCLGALAEAYPSKPDNPGE | Negative |
| P01303 | ALAEAYPSKPDNPGEDAPAE | Negative |
| P01303 | SGLTLALSLLVCLGALAEAY | Negative |
| P01303 | LSGLTLALSLLVCLGALAEA | Negative |
| P01307 | IFTYGELQRMQEKERNKGQK | Negative |
| P01307 | FTYGELQRMQEKERNKGQKK | Negative |
| P01307 | LLVVHAAAMLASHTAEFVPI | Negative |
| P01307 | TEAFVPIFTYGELQRMQEKE | Negative |
| P01307 | ASHTAEFVPIFTYGELQRMQ | Negative |
| P01307 | AMLASHTAEFVPIFTYGELQ | Negative |
| P01307 | HTEAFVPIFTYGELQRMQEK | Negative |
| P01307 | VPIFTYGELQRMQEKERNKG | Negative |
| P01307 | KAVVVLLVVHAAAMLASHTE | Negative |
| P01307 | AFVPIFTYGELQRMQEKERN | Negative |
| P01307 | SRKAVVVLLVVHAAAMLASH | Negative |
| P01307 | VSRKAVVVLLVVHAAAMLAS | Negative |
| P01307 | FVPIFTYGELQRMQEKERNK | Negative |
| P01307 | MVSRKAVVVLLVVHAAAMLA | Negative |
| P01307 | VVLLVVHAAAMLASHTAEFV | Negative |
| P01307 | MLASHTAEFVPIFTYGELQR | Negative |
| P01307 | AVVVLLVVHAAAMLASHTEA | Negative |
| P01307 | VLLVVHAAAMLASHTAEFVP | Negative |
| P01307 | AAMLASHTAEFVPIFTYGEL | Negative |
| P01307 | VVVLLVVHAAAMLASHTAEF | Negative |
| P01307 | PIFTYGELQRMQEKERNKGQ | Negative |
| P01307 | HAAAMLASHTAEFVPIFTYG | Negative |
| P01307 | VHAAAMLASHTAEFVPIFTY | Negative |
| P01307 | VVHAAAMLASHTAEFVPIFT | Negative |
| P01307 | SHTAEFVPIFTYGELQRMQE | Negative |
| P01307 | RKAVVVLLVVHAAAMLASHT | Negative |

|        |                       |          |
|--------|-----------------------|----------|
| P01307 | AAAMLASHTEAFVPIFTYGE  | Negative |
| P01307 | LASHTEAFVPIFTYGELQRM  | Negative |
| P01307 | EAFVPIFTYGELQRMQEKER  | Negative |
| P01308 | PAAAFVNQHLCGSHLVEALY  | Negative |
| P01308 | ALLALWGPDPAAAFVNQHLC  | Negative |
| P01308 | LLALWGPDPAAAFVNQHLCG  | Negative |
| P01308 | LALWGPDPAAAFVNQHLCGS  | Negative |
| P01308 | QHLCGSHLVEALYLVCGERG  | Negative |
| P01308 | GPDPAAAFVNQHLCGSHLVE  | Negative |
| P01308 | ALWGPDPAAAFVNQHLCGSH  | Negative |
| P01308 | FVNQHLCGSHLVEALYLVCG  | Negative |
| P01308 | NQHLCGSHLVEALYLVCGER  | Negative |
| P01308 | MALWMRLLPLLALLALWGPDP | Negative |
| P01308 | LCGSHLVEALYLVCGERGFF  | Negative |
| P01308 | ALWMRLLPLLALLALWGPDP  | Negative |
| P01308 | PDPAAAFVNQHLCGSHLVEA  | Negative |
| P01308 | LWGPDPAAAFVNQHLCGSHL  | Negative |
| P01308 | LWMRLLPLLALLALWGPDP   | Negative |
| P01308 | WGPDPAAAFVNQHLCGSHLV  | Negative |
| P01308 | WMRLLPLLALLALWGPDPAA  | Negative |
| P01308 | AAAFVNQHLCGSHLVEALYLV | Negative |
| P01308 | MRLLPLLALLALWGPDPAAA  | Negative |
| P01308 | AAAFVNQHLCGSHLVEALYL  | Negative |
| P01308 | LPLLALLALWGPDPAAAFVN  | Negative |
| P01308 | PLLALLALWGPDPAAAFVNQ  | Negative |
| P01308 | RLLPLLALLALWGPDPAAAF  | Negative |
| P01308 | VNQHLCGSHLVEALYLVCGE  | Negative |
| P01308 | LALLALWGPDPAAAFVNQHL  | Negative |
| P01308 | LLPLLALLALWGPDPAAAFV  | Negative |
| P01308 | HLCGSHLVEALYLVCGERGF  | Negative |
| P01308 | DPAAAFVNQHLCGSHLVEAL  | Negative |
| P01308 | AFVNQHLCGSHLVEALYLC   | Negative |
| P01311 | LVLCRLDPAQAFVNQHLCGS  | Negative |
| P01311 | LLVLCRLDPAQAFVNQHLCG  | Negative |
| P01311 | AALLPLLALLVLCRLDPAQA  | Negative |
| P01311 | PLLALLVLCRLDPAQAFVNQ  | Negative |
| P01311 | VNQHLCGSHLVEALYLVCGE  | Negative |
| P01311 | DPAQAFVNQHLCGSHLVEAL  | Negative |
| P01311 | VLCRLDPAQAFVNQHLCGSH  | Negative |
| P01311 | MASLAALLPLLALLVLCRLD  | Negative |
| P01311 | FVNQHLCGSHLVEALYLVCG  | Negative |
| P01311 | LPLLALLVLCRLDPAQAFVN  | Negative |
| P01311 | CRLDPAQAFVNQHLCGSHLV  | Negative |
| P01311 | LALLVLCRLDPAQAFVNQHL  | Negative |
| P01311 | AFVNQHLCGSHLVEALYLC   | Negative |
| P01311 | QAFVNQHLCGSHLVEALYLV  | Negative |

|        |                      |          |
|--------|----------------------|----------|
| P01311 | LLPLLALLVLCRLDPAQAFV | Negative |
| P01311 | LDPAQAFVNQHLCGSHLVEA | Negative |
| P01311 | RLDPAQAFVNQHLCGSHLVE | Negative |
| P01311 | HLCGSHLVEALYLVCGERGF | Negative |
| P01311 | AQAFVNQHLCGSHLVEALYL | Negative |
| P01311 | NQHLCGSHLVEALYLVCGER | Negative |
| P01311 | ALLVLCRLDPAQAFVNQHLC | Negative |
| P01311 | SLAALLPLLALLVLCRLDPA | Negative |
| P01311 | LCGSHLVEALYLVCGERGFF | Negative |
| P01311 | ALLPLLALLVLCRLDPAQAF | Negative |
| P01311 | LAALLPLLALLVLCRLDPAQ | Negative |
| P01311 | PAQAFVNQHLCGSHLVEALY | Negative |
| P01311 | QHLCGSHLVEALYLVCGERG | Negative |
| P01311 | ASLAALLPLLALLVLCRLDP | Negative |
| P01311 | LCRLDPAQAFVNQHLCGSHL | Negative |
| P01313 | LVLWEPNPAQAFVNQHLCGS | Negative |
| P01313 | MRLPLLTLVLWEPNPAQA   | Negative |
| P01313 | VLWEPNPAQAFVNQHLCGSH | Negative |
| P01313 | PAQAFVNQHLCGSHLVEALY | Negative |
| P01313 | LLVLWEPNPAQAFVNQHLCG | Negative |
| P01313 | TLWMRLLPLLTLVLWEPNP  | Negative |
| P01313 | LWMRLLPLLTLVLWEPNPA  | Negative |
| P01313 | LPLLTLVLWEPNPAQAFVN  | Negative |
| P01313 | NPAQAFVNQHLCGSHLVEAL | Negative |
| P01313 | LCGSHLVEALYLVCGERGFF | Negative |
| P01313 | AFVNQHLCGSHLVEALYLV  | Negative |
| P01313 | LWEPNPAQAFVNQHLCGSHL | Negative |
| P01313 | PNPAQAFVNQHLCGSHLVEA | Negative |
| P01313 | TLLVLWEPNPAQAFVNQHLC | Negative |
| P01313 | FVNQHLCGSHLVEALYLVCG | Negative |
| P01313 | WEPNPAQAFVNQHLCGSHLV | Negative |
| P01313 | HLCGSHLVEALYLVCGERGF | Negative |
| P01313 | WMRLLPLLTLVLWEPNPAQ  | Negative |
| P01313 | LTLVLWEPNPAQAFVNQHL  | Negative |
| P01313 | LLPLLTLVLWEPNPAQAFV  | Negative |
| P01313 | NQHLCGSHLVEALYLVCGER | Negative |
| P01313 | QHLCGSHLVEALYLVCGERG | Negative |
| P01313 | RLLPLLTLVLWEPNPAQAF  | Negative |
| P01313 | QAFVNQHLCGSHLVEALYLV | Negative |
| P01313 | MTLWMRLLPLLTLVLWEPN  | Negative |
| P01313 | VNQHLCGSHLVEALYLVCGE | Negative |
| P01313 | PLLTLVLWEPNPAQAFVNQ  | Negative |
| P01313 | EPNPAQAFVNQHLCGSHLVE | Negative |
| P01313 | AQAFVNQHLCGSHLVEALYL | Negative |
| P01315 | VNQHLCGSHLVEALYLVCGE | Negative |
| P01315 | PLLALLALWAPAPAQAFVNQ | Negative |

|        |                      |          |
|--------|----------------------|----------|
| P01315 | WTRLLPLLALLALWAPAPAQ | Negative |
| P01315 | ALLALWAPAPAQAFVNQHLC | Negative |
| P01315 | QHLCGSHLVEALYLVCGERG | Negative |
| P01315 | LLPLLALLALWAPAPAQAFV | Negative |
| P01315 | LPLLALLALWAPAPAQAFVN | Negative |
| P01315 | MALWTRLLPLLALLALWAPA | Negative |
| P01315 | LALLALWAPAPAQAFVNQHL | Negative |
| P01315 | LWAPAPAQAFVNQHLCGSHL | Negative |
| P01315 | AQAFVNQHLCGSHLVEALYL | Negative |
| P01315 | NQHLCGSHLVEALYLVCGER | Negative |
| P01315 | PAQAFVNQHLCGSHLVEALY | Negative |
| P01315 | LLALWAPAPAQAFVNQHLCG | Negative |
| P01315 | WAPAPAQAFVNQHLCGSHLV | Negative |
| P01315 | LCGSHLVEALYLVCGERGFF | Negative |
| P01315 | ALWTRLLPLLALLALWAPAP | Negative |
| P01315 | LWTRLLPLLALLALWAPAPA | Negative |
| P01315 | TRLLPLLALLALWAPAPAQ  | Negative |
| P01315 | FVNQHLCGSHLVEALYLVC  | Negative |
| P01315 | QAFVNQHLCGSHLVEALYLV | Negative |
| P01315 | ALWAPAPAQAFVNQHLCGSH | Negative |
| P01315 | APAQAFVNQHLCGSHLVEAL | Negative |
| P01315 | PAPAQAFVNQHLCGSHLVEA | Negative |
| P01315 | RLLPLLALLALWAPAPAQAF | Negative |
| P01315 | HLCGSHLVEALYLVCGERGF | Negative |
| P01315 | APAPAQAFVNQHLCGSHLVE | Negative |
| P01315 | LALWAPAPAQAFVNQHLCGS | Negative |
| P01315 | AFVNQHLCGSHLVEALYLV  | Negative |
| P01317 | RAFVNQHLCGSHLVEALYLV | Negative |
| P01317 | LWTRLRPLLALLALWPPPPA | Negative |
| P01317 | LALWPPPPARAFVNQHLCGS | Negative |
| P01317 | QHLCGSHLVEALYLVCGERG | Negative |
| P01317 | MALWTRLRPLLALLALWPPP | Negative |
| P01317 | LWPPPPARAFVNQHLCGSHL | Negative |
| P01317 | LRPLLALLALWPPPPARAFV | Negative |
| P01317 | WPPPPARAFVNQHLCGSHLV | Negative |
| P01317 | PARAFVNQHLCGSHLVEALY | Negative |
| P01317 | ARAFVNQHLCGSHLVEALYL | Negative |
| P01317 | ALWTRLRPLLALLALWPPPP | Negative |
| P01317 | TRLRPLLALLALWPPPPARA | Negative |
| P01317 | LLALWPPPPARAFVNQHLCG | Negative |
| P01317 | PPPPARAFVNQHLCGSHLVE | Negative |
| P01317 | NQHLCGSHLVEALYLVCGER | Negative |
| P01317 | PPPARAFVNQHLCGSHLVEA | Negative |
| P01317 | RLRPLLALLALWPPPPARAF | Negative |
| P01317 | LCGSHLVEALYLVCGERGFF | Negative |
| P01317 | ALLALWPPPPARAFVNQHLC | Negative |

|        |                      |          |
|--------|----------------------|----------|
| P01317 | ALWPPPPARAFVNQHLCGSH | Negative |
| P01317 | VNQHLCGSHLVEALYLVCGE | Negative |
| P01317 | PLLALLALWPPPPARAFVNQ | Negative |
| P01317 | LALLALWPPPPARAFVNQHL | Negative |
| P01317 | HLCGSHLVEALYLVCGERGF | Negative |
| P01317 | PPARAFVNQHLCGSHLVEAL | Negative |
| P01317 | AFVNQHLCGSHLVEALYLV  | Negative |
| P01317 | FVNQHLCGSHLVEALYLVCG | Negative |
| P01317 | RPLLALLALWPPPPARAFVN | Negative |
| P01317 | WTRLRPLLALLALWPPPPAR | Negative |
| P01318 | VPLLALLALWAPAPAHAFVN | Negative |
| P01318 | HAFVNQHLCGSHLVEALYLV | Negative |
| P01318 | ALWAPAPAHAFVNQHLCGSH | Negative |
| P01318 | APAHAFVNQHLCGSHLVEAL | Negative |
| P01318 | LLALWAPAPAHAFVNQHLCG | Negative |
| P01318 | WAPAPAHAFVNQHLCGSHLV | Negative |
| P01318 | PAPAHAFVNQHLCGSHLVEA | Negative |
| P01318 | QHLCGSHLVEALYLVCGERG | Negative |
| P01318 | VNQHLCGSHLVEALYLVCGE | Negative |
| P01318 | TRLVPLLALLALWAPAPAH  | Negative |
| P01318 | APAPAHAFVNQHLCGSHLVE | Negative |
| P01318 | RLVPLLALLALWAPAPAHAF | Negative |
| P01318 | LVPLLALLALWAPAPAHAFV | Negative |
| P01318 | LWTRLVPLLALLALWAPAPA | Negative |
| P01318 | PAHAFVNQHLCGSHLVEALY | Negative |
| P01318 | ALWTRLVPLLALLALWAPAP | Negative |
| P01318 | LALLALWAPAPAHAFVNQHL | Negative |
| P01318 | AFVNQHLCGSHLVEALYLV  | Negative |
| P01318 | LWAPAPAHAFVNQHLCGSHL | Negative |
| P01318 | ALLALWAPAPAHAFVNQHLC | Negative |
| P01318 | LALWAPAPAHAFVNQHLCGS | Negative |
| P01318 | AHAFVNQHLCGSHLVEALYL | Negative |
| P01318 | FVNQHLCGSHLVEALYLVCG | Negative |
| P01318 | MALWTRLVPLLALLALWAPA | Negative |
| P01318 | PLLALLALWAPAPAHAFVNQ | Negative |
| P01318 | WTRLVPLLALLALWAPAPAH | Negative |
| P01318 | LCGSHLVEALYLVCGERGFF | Negative |
| P01318 | NQHLCGSHLVEALYLVCGER | Negative |
| P01318 | HLCGSHLVEALYLVCGERGF | Negative |
| P01321 | LALLALWAPAPTRAFVNQHL | Negative |
| P01321 | APTRAFVNQHLCGSHLVEAL | Negative |
| P01321 | MRLPLLALLALWAPAPTRA  | Negative |
| P01321 | ALWAPAPTRAFVNQHLCGSH | Negative |
| P01321 | WMRLPLLALLALWAPAPTR  | Negative |
| P01321 | QHLCGSHLVEALYLVCGERG | Negative |
| P01321 | LPLLALLALWAPAPTRAFVN | Negative |



|        |                      |          |
|--------|----------------------|----------|
| P01321 | APAPTRAFVNQHLCGSHLVE | Negative |
| P01321 | VNQHLCGSHLVEALYLVCGE | Negative |
| P01321 | FVNQHLCGSHLVEALYLVCG | Negative |
| P01321 | RAFVNQHLCGSHLVEALYLV | Negative |
| P01321 | WAPAPTRAFVNQHLCGSHLV | Negative |
| P01321 | PTRAFVNQHLCGSHLVEALY | Negative |
| P01321 | RLLPLLALLALWAPAPTRAF | Negative |
| P01321 | LLPLLALLALWAPAPTRAFV | Negative |
| P01321 | PAPTRAFVNQHLCGSHLVEA | Negative |
| P01321 | LWAPAPTRAFVNQHLCGSHL | Negative |
| P01321 | MALWMRLLPLLALLALWAPA | Negative |
| P01321 | TRAFVNQHLCGSHLVEALYL | Negative |
| P01321 | LCGSHLVEALYLVCGERGFF | Negative |
| P01321 | LLALWAPAPTRAFVNQHLCG | Negative |
| P01321 | NQHLCGSHLVEALYLVCGER | Negative |
| P01321 | LWMRLLPLLALLALWAPAPT | Negative |
| P01321 | PLLALLALWAPAPTRAFVNQ | Negative |
| P01321 | LALWAPAPTRAFVNQHLCGS | Negative |
| P01321 | HLCGSHLVEALYLVCGERGF | Negative |
| P01321 | ALWMRLLPLLALLALWAPAP | Negative |
| P01321 | ALLALWAPAPTRAFVNQHLC | Negative |
| P01321 | AFVNQHLCGSHLVEALYLV  | Negative |
| P01322 | LVLWEPKPAQAFVKQHLCGP | Negative |
| P01322 | FLPLLALLVLWEPKPAQAFV | Negative |
| P01322 | WMRFLPLLALLVLWEPKPAQ | Negative |
| P01322 | LPLLALLVLWEPKPAQAFVK | Negative |
| P01322 | ALLVLWEPKPAQAFVKQHLC | Negative |
| P01322 | FVKQHLCGPHLVEALYLVCG | Negative |
| P01322 | LCGPHLVEALYLVCGERGFF | Negative |
| P01322 | HLCGPHLVEALYLVCGERGF | Negative |
| P01322 | PKPAQAFVKQHLCGPHLVEA | Negative |
| P01322 | KQHLCGPHLVEALYLVCGER | Negative |
| P01322 | QAFVKQHLCGPHLVEALYLV | Negative |
| P01322 | LWMRFLPLLALLVLWEPKPA | Negative |
| P01322 | VLWEPKPAQAFVKQHLCGPH | Negative |
| P01322 | AFVKQHLCGPHLVEALYLV  | Negative |
| P01322 | AQAFVKQHLCGPHLVEALYL | Negative |
| P01322 | QHLCGPHLVEALYLVCGERG | Negative |
| P01322 | VKQHLCGPHLVEALYLVCGE | Negative |
| P01322 | KPAQAFVKQHLCGPHLVEAL | Negative |
| P01322 | LLVLWEPKPAQAFVKQHLCG | Negative |
| P01322 | RFLPLLALLVLWEPKPAQAF | Negative |
| P01322 | PAQAFVKQHLCGPHLVEALY | Negative |
| P01322 | WEPKPAQAFVKQHLCGPHLV | Negative |
| P01322 | MRFLPLLALLVLWEPKPAQA | Negative |
| P01322 | MALWMRFLPLLALLVLWEPK | Negative |

|        |                      |          |
|--------|----------------------|----------|
| P01322 | LWEPKPAQAFVKQHLCGPHL | Negative |
| P01322 | LALLVLWEPKPAQAFVKQHL | Negative |
| P01322 | EPKPAQAFVKQHLCGPHLVE | Negative |
| P01322 | ALWMRFLPLLALLVLWEPKP | Negative |
| P01322 | PLLALLVLWEPKPAQAFVKQ | Negative |
| P01323 | PLLALLILWEPRPAQAFVKQ | Negative |
| P01323 | KQHLCGSHLVEALYLVCGER | Negative |
| P01323 | QAFVKQHLCGSHLVEALYLV | Negative |
| P01323 | HLCGSHLVEALYLVCGERGF | Negative |
| P01323 | ILWEPRPAQAFVKQHLCGSH | Negative |
| P01323 | ALLILWEPRPAQAFVKQHLC | Negative |
| P01323 | WIRFLPLLALLILWEPRPAQ | Negative |
| P01323 | LCGSHLVEALYLVCGERGFF | Negative |
| P01323 | EPRPAQAFVKQHLCGSHLVE | Negative |
| P01323 | LPLLALLILWEPRPAQAFVK | Negative |
| P01323 | LALLILWEPRPAQAFVKQHL | Negative |
| P01323 | LWIRFLPLLALLILWEPRPA | Negative |
| P01323 | LWEPRPAQAFVKQHLCGSHL | Negative |
| P01323 | AFVKQHLCGSHLVEALYLV  | Negative |
| P01323 | PRPAQAFVKQHLCGSHLVEA | Negative |
| P01323 | RPAQAFVKQHLCGSHLVEAL | Negative |
| P01323 | LLILWEPRPAQAFVKQHLCG | Negative |
| P01323 | FLPLLALLILWEPRPAQAFV | Negative |
| P01323 | VKQHLCGSHLVEALYLVCGE | Negative |
| P01323 | LILWEPRPAQAFVKQHLCGS | Negative |
| P01323 | ALWIRFLPLLALLILWEPRP | Negative |
| P01323 | FVKQHLCGSHLVEALYLVCG | Negative |
| P01323 | WEPRPAQAFVKQHLCGSHLV | Negative |
| P01323 | IRFLPLLALLILWEPRPAQA | Negative |
| P01323 | QHLCGSHLVEALYLVCGERG | Negative |
| P01323 | AQAFVKQHLCGSHLVEALYL | Negative |
| P01323 | RFLPLLALLILWEPRPAQAF | Negative |
| P01323 | PAQAFVKQHLCGSHLVEALY | Negative |
| P01323 | MALWIRFLPLLALLILWEPR | Negative |
| P01325 | ALLALWEPKPTQAFVKQHLC | Negative |
| P01325 | FLPLLALLALWEPKPTQAFV | Negative |
| P01325 | QAFVKQHLCGPHLVEALYLV | Negative |
| P01325 | TQAFVKQHLCGPHLVEALYL | Negative |
| P01325 | ALLVHFLPLLALLALWEPKP | Negative |
| P01325 | LPLLALLALWEPKPTQAFVK | Negative |
| P01325 | ALWEPKPTQAFVKQHLCGPH | Negative |
| P01325 | LVHFLPLLALLALWEPKPTQ | Negative |
| P01325 | KQHLCGPHLVEALYLVCGER | Negative |
| P01325 | MALLVHFLPLLALLALWEPK | Negative |
| P01325 | EPKPTQAFVKQHLCGPHLVE | Negative |
| P01325 | LWEPKPTQAFVKQHLCGPHL | Negative |

|        |                       |          |
|--------|-----------------------|----------|
| P01325 | PKPTQAFVKQHLCGPHLVEA  | Negative |
| P01325 | PLLALLALWEPKPTQAFVKQ  | Negative |
| P01325 | LLVHFLPLLALLALWEPKPT  | Negative |
| P01325 | LLALWEPKPTQAFVKQHLCG  | Negative |
| P01325 | LALLALWEPKPTQAFVKQHL  | Negative |
| P01325 | VHFLPLLALLALWEPKPTQA  | Negative |
| P01325 | AFVKQHLCGPHLVEALYLCV  | Negative |
| P01325 | VKQHLCGPHLVEALYLCVGE  | Negative |
| P01325 | KPTQAFVKQHLCGPHLVEAL  | Negative |
| P01325 | HFLPLLALLALWEPKPTQAF  | Negative |
| P01325 | FVKQHLCGPHLVEALYLCVG  | Negative |
| P01325 | QHLCGPHLVEALYLCVGERG  | Negative |
| P01325 | PTQAFVKQHLCGPHLVEALY  | Negative |
| P01325 | LALWEPKPTQAFVKQHLCGP  | Negative |
| P01325 | LCGPHLVEALYLCVGERGFF  | Negative |
| P01325 | WEPKPTQAFVKQHLCGPHLV  | Negative |
| P01325 | HLCGPHLVEALYLCVGERGF  | Negative |
| P01326 | KQHLCGSHLVEALYLCVGER  | Negative |
| P01326 | ALWMRFLPLLALLFLWESHPT | Negative |
| P01326 | LWESHPTQAFVKQHLCGSHL  | Negative |
| P01326 | PTQAFVKQHLCGSHLVEALY  | Negative |
| P01326 | LWMRFLPLLALLFLWESHPT  | Negative |
| P01326 | WESHPTQAFVKQHLCGSHLV  | Negative |
| P01326 | ALLFLWESHPTQAFVKQHLC  | Negative |
| P01326 | HLCGSHLVEALYLCVGERGF  | Negative |
| P01326 | LPLLALLFLWESHPTQAFVK  | Negative |
| P01326 | VKQHLCGSHLVEALYLCVGE  | Negative |
| P01326 | QAFVKQHLCGSHLVEALYLV  | Negative |
| P01326 | LFLWESHPTQAFVKQHLCGS  | Negative |
| P01326 | MRFLPLLALLFLWESHPTQA  | Negative |
| P01326 | FLWESHPTQAFVKQHLCGSH  | Negative |
| P01326 | SHPTQAFVKQHLCGSHLVEA  | Negative |
| P01326 | AFVKQHLCGSHLVEALYLCV  | Negative |
| P01326 | HPTQAFVKQHLCGSHLVEAL  | Negative |
| P01326 | WMRFLPLLALLFLWESHPTQ  | Negative |
| P01326 | RFLPLLALLFLWESHPTQAF  | Negative |
| P01326 | QHLCGSHLVEALYLCVGERG  | Negative |
| P01326 | LALLFLWESHPTQAFVKQHL  | Negative |
| P01326 | ESHPTQAFVKQHLCGSHLVE  | Negative |
| P01326 | FVKQHLCGSHLVEALYLCVG  | Negative |
| P01326 | MALWMRFLPLLALLFLWESH  | Negative |
| P01326 | TQAFVKQHLCGSHLVEALYL  | Negative |
| P01326 | FLPLLALLFLWESHPTQAFV  | Negative |
| P01326 | PLLALLFLWESHPTQAFVKQ  | Negative |
| P01326 | LLFLWESHPTQAFVKQHLCG  | Negative |
| P01326 | LCGSHLVEALYLCVGERGFF  | Negative |

|        |                      |          |
|--------|----------------------|----------|
| P01329 | LALWGPNTGQAFVSRHLCGS | Negative |
| P01329 | LWMHLLTVLALLALWGPNTG | Negative |
| P01329 | LLTVLALLALWGPNTGQAFV | Negative |
| P01329 | QAFVSRHLCGSNLVETLYSV | Negative |
| P01329 | ALWGPNTGQAFVSRHLCGSN | Negative |
| P01329 | AFVSRHLCGSNLVETLYSVC | Negative |
| P01329 | LTVLALLALWGPNTGQAFVS | Negative |
| P01329 | VSRHLCGSNLVETLYSVCQD | Negative |
| P01329 | FVSRHLCGSNLVETLYSVCQ | Negative |
| P01329 | ALWMHLLTVLALLALWGPNT | Negative |
| P01329 | ALLALWGPNTGQAFVSRHLC | Negative |
| P01329 | MALWMHLLTVLALLALWGPN | Negative |
| P01329 | MHLLTVLALLALWGPNTGQA | Negative |
| P01329 | WMHLLTVLALLALWGPNTGQ | Negative |
| P01329 | RHLCGSNLVETLYSVCQDDG | Negative |
| P01329 | GQAFVSRHLCGSNLVETLYS | Negative |
| P01329 | SRHLCGSNLVETLYSVCQDD | Negative |
| P01329 | LWGPNTGQAFVSRHLCGSNL | Negative |
| P01329 | LALLALWGPNTGQAFVSRHL | Negative |
| P01329 | LLALWGPNTGQAFVSRHLCG | Negative |
| P01329 | PNTGQAFVSRHLCGSNLVET | Negative |
| P01329 | HLLTVLALLALWGPNTGQAF | Negative |
| P01329 | WGPNTGQAFVSRHLCGSNLV | Negative |
| P01329 | LCGSNLVETLYSVCQDDGFF | Negative |
| P01329 | TGQAFVSRHLCGSNLVETLY | Negative |
| P01329 | NTGQAFVSRHLCGSNLVETL | Negative |
| P01329 | TVLALLALWGPNTGQAFVSR | Negative |
| P01329 | HLCGSNLVETLYSVCQDDGF | Negative |
| P01329 | GPNTGQAFVSRHLCGSNLVE | Negative |
| P01335 | LLFLLAVSSVNANAGAPQHL | Negative |
| P01335 | APQHLCGSHLVDALYLVCGP | Negative |
| P01335 | GAPQHLCGSHLVDALYLVCG | Negative |
| P01335 | VWIQAGALLFLLAVSSVNAN | Negative |
| P01335 | NANAGAPQHLCGSHLVDALY | Negative |
| P01335 | HLCGSHLVDALYLVCGPTGF | Negative |
| P01335 | LFLAVSSVNANAGAPQHLC  | Negative |
| P01335 | AGAPQHLCGSHLVDALYLC  | Negative |
| P01335 | VNANAGAPQHLCGSHLVDAL | Negative |
| P01335 | VSSVNANAGAPQHLCGSHLV | Negative |
| P01335 | SSVNANAGAPQHLCGSHLVD | Negative |
| P01335 | LLAVSSVNANAGAPQHLCGS | Negative |
| P01335 | LCGSHLVDALYLVCGPTGFF | Negative |
| P01335 | ANAGAPQHLCGSHLVDALYL | Negative |
| P01335 | NAGAPQHLCGSHLVDALYLV | Negative |
| P01335 | GALLFLLAVSSVNANAGAPQ | Negative |
| P01335 | AVSSVNANAGAPQHLCGSHL | Negative |

|        |                      |          |
|--------|----------------------|----------|
| P01335 | CGSHLVDALYLVCGPTGFFY | Negative |
| P01335 | PQHLCGSHLVDALYLVCGPT | Negative |
| P01335 | LAVSSVNANAGAPQHLCGSH | Negative |
| P01335 | FLLAVSSVNANAGAPQHLCG | Negative |
| P01335 | QAGALLFLLAVSSVNANAGA | Negative |
| P01335 | SVNANAGAPQHLCGSHLVDA | Negative |
| P01335 | QHLCGSHLVDALYLVCGPTG | Negative |
| P01335 | MAVWIQAGALLFLLAVSSVN | Negative |
| P01335 | WIQAGALLFLLAVSSVNANA | Negative |
| P01335 | AVWIQAGALLFLLAVSSVNA | Negative |
| P01335 | IQAGALLFLLAVSSVNANAG | Negative |
| P01335 | ALLFLLAVSSVNANAGAPQH | Negative |
| P01342 | DTRTTGHLGKDLVNALYIA  | Negative |
| P01342 | LVLLSRAPPSADTRTTGHL  | Negative |
| P01342 | LAAVIPLVLLSRAPPSADT  | Negative |
| P01342 | APPSADTRTTGHLGKDLVN  | Negative |
| P01342 | VLLSRAPPSADTRTTGHL   | Negative |
| P01342 | GHLCGKDLVNALYIACGVRG | Negative |
| P01342 | RAPPSADTRTTGHLGKDLV  | Negative |
| P01342 | TGHLGKDLVNALYIACGVR  | Negative |
| P01342 | ADTRTTGHLGKDLVNALYI  | Negative |
| P01342 | IPLVLLSRAPPSADTRTTG  | Negative |
| P01342 | LSPFLAAVIPLVLLSRAPP  | Negative |
| P01342 | LLSRAPPSADTRTTGHLGK  | Negative |
| P01342 | TRTTGHLGKDLVNALYIAC  | Negative |
| P01342 | SADTRTTGHLGKDLVNALY  | Negative |
| P01342 | FLAAVIPLVLLSRAPPSAD  | Negative |
| P01342 | PSADTRTTGHLGKDLVNAL  | Negative |
| P01342 | TTGHLGKDLVNALYIACGV  | Negative |
| P01342 | ALSPFLAAVIPLVLLSRAP  | Negative |
| P01342 | MALSPFLAAVIPLVLLSRA  | Negative |
| P01342 | SRAPPSADTRTTGHLGKDL  | Negative |
| P01342 | LSRAPPSADTRTTGHLGKD  | Negative |
| P01342 | RTTGHLGKDLVNALYIACG  | Negative |
| P01342 | PPSADTRTTGHLGKDLVNA  | Negative |
| P01342 | LLSRAPPSADTRTTGHLG   | Negative |
| P01342 | PFLAAVIPLVLLSRAPPSA  | Negative |
| P01342 | SPFLAAVIPLVLLSRAPPS  | Negative |
| P01342 | AVIPLVLLSRAPPSADTRT  | Negative |
| P01342 | VIPLVLLSRAPPSADTRTT  | Negative |
| P01342 | AAVIPLVLLSRAPPSADTR  | Negative |
| P01344 | AYRPSETLCGGELVDTLQFV | Negative |
| P01344 | LAFASCCIAAYRPSETLCGG | Negative |
| P01344 | GIPMGKSMLVLLTFLAFASC | Negative |
| P01344 | ASCCIAAYRPSETLCGGELV | Negative |
| P01344 | PSETLCGGELVDTLQFVCGD | Negative |

|        |                      |          |
|--------|----------------------|----------|
| P01344 | GKSMLVLLTFLAFASCCIAA | Negative |
| P01344 | MGKSMLVLLTFLAFASCCIA | Negative |
| P01344 | MGIPMGKSMLVLLTFLAFAS | Negative |
| P01344 | AAYPSETLCGGELVDTLQF  | Negative |
| P01344 | MLVLLTFLAFASCCIAAYRP | Negative |
| P01344 | SETLCGGELVDTLQFVCGDR | Negative |
| P01344 | PMGKSMLVLLTFLAFASCCI | Negative |
| P01344 | SMLVLLTFLAFASCCIAAYR | Negative |
| P01344 | RPSETLCGGELVDTLQFVCG | Negative |
| P01344 | CCIAAYRPSETLCGGELVDT | Negative |
| P01344 | FASCCIAAYRPSETLCGGEL | Negative |
| P01344 | LTFLAFASCCIAAYRPSETL | Negative |
| P01344 | YRPSETLCGGELVDTLQFVC | Negative |
| P01344 | IPMGKSMLVLLTFLAFASCC | Negative |
| P01344 | IAAYRPSETLCGGELVDTLQ | Negative |
| P01344 | ETLCGGELVDTLQFVCGDRG | Negative |
| P01344 | KSMLVLLTFLAFASCCIAAY | Negative |
| P01344 | LLTFLAFASCCIAAYRPSET | Negative |
| P01344 | FLAFASCCIAAYRPSETLCG | Negative |
| P01344 | AFASCCIAAYRPSETLCGGE | Negative |
| P01344 | VLLTFLAFASCCIAAYRPSE | Negative |
| P01344 | SCCIAAYRPSETLCGGELVD | Negative |
| P01344 | TFLAFASCCIAAYRPSETLC | Negative |
| P01344 | CIAAYRPSETLCGGELVDTL | Negative |
| P01346 | MGIPVGKSMLVLLISLAFAL | Negative |
| P01346 | AYRPSETLCGGELVDTLQFV | Negative |
| P01346 | LISLAFALCCIAAYRPSETL | Negative |
| P01346 | MLVLLISLAFALCCIAAYRP | Negative |
| P01346 | SETLCGGELVDTLQFVCSDR | Negative |
| P01346 | RPSETLCGGELVDTLQFVCS | Negative |
| P01346 | VGKSMLVLLISLAFALCCIA | Negative |
| P01346 | IPVGKSMLVLLISLAFALCC | Negative |
| P01346 | YRPSETLCGGELVDTLQFVC | Negative |
| P01346 | LCCIAAYRPSETLCGGELVD | Negative |
| P01346 | GIPVGKSMLVLLISLAFALC | Negative |
| P01346 | CCIAAYRPSETLCGGELVDT | Negative |
| P01346 | ALCCIAAYRPSETLCGGELV | Negative |
| P01346 | IAAYRPSETLCGGELVDTLQ | Negative |
| P01346 | KSMLVLLISLAFALCCIAAY | Negative |
| P01346 | SLAFALCCIAAYRPSETLCG | Negative |
| P01346 | LLISLAFALCCIAAYRPSET | Negative |
| P01346 | PSETLCGGELVDTLQFVCSD | Negative |
| P01346 | LAFALCCIAAYRPSETLCGG | Negative |
| P01346 | PVGKSMLVLLISLAFALCCI | Negative |
| P01346 | FALCCIAAYRPSETLCGGEL | Negative |
| P01346 | GKSMLVLLISLAFALCCIAA | Negative |

|        |                       |          |
|--------|-----------------------|----------|
| P01346 | AFALCCIAAYRPSETLCGGE  | Negative |
| P01346 | ISLAFALCCIAAYRPSETLC  | Negative |
| P01346 | SMLVLLISLAFALCCIAAYR  | Negative |
| P01346 | ETLCGGELVDTLQFVCSDRG  | Negative |
| P01346 | AAYPSETLCGGELVDTLQF   | Negative |
| P01346 | CIAAYRPSETLCGGELVDTL  | Negative |
| P01346 | VLLISLAFALCCIAAYRPSE  | Negative |
| P01347 | RARVSEEWMDQVIQVCGRGY  | Negative |
| P01347 | FWLFLSQPCRARVSEEWMDQ  | Negative |
| P01347 | DQVIQVCGRGYARAWIEVCG  | Negative |
| P01347 | SEEWMDQVIQVCGRGYARAW  | Negative |
| P01347 | PCRARVSEEWMDQVIQVCGR  | Negative |
| P01347 | SSRLLLQLLGFWLFLSQPCR  | Negative |
| P01347 | GFWLFLSQPCRARVSEEWMD  | Negative |
| P01347 | QPCRARVSEEWMDQVIQVCG  | Negative |
| P01347 | EEWMDQVIQVCGRGYARAWI  | Negative |
| P01347 | WMDQVIQVCGRGYARAWIEV  | Negative |
| P01347 | ARVSEEWMDQVIQVCGRGYA  | Negative |
| P01347 | MDQVIQVCGRGYARAWIEVC  | Negative |
| P01347 | LGFWLFLSQPCRARVSEEW   | Negative |
| P01347 | LLLQLLGFWLFLSQPCRARV  | Negative |
| P01347 | LFLSQPCRARVSEEWMDQVI  | Negative |
| P01347 | LSQPCRARVSEEWMDQVIQV  | Negative |
| P01347 | SRLLLQLLGFWLFLSQPCRA  | Negative |
| P01347 | WLFLSQPCRARVSEEWMDQV  | Negative |
| P01347 | LQLLGFWLFLSQPCRARVSE  | Negative |
| P01347 | CRARVSEEWMDQVIQVCGRG  | Negative |
| P01347 | EWMDQVIQVCGRGYARAWIE  | Negative |
| P01347 | SQPCRARVSEEWMDQVIQVC  | Negative |
| P01347 | LLQLLGFWLFLSQPCRARVS  | Negative |
| P01347 | FLSQPCRARVSEEWMDQVIQ  | Negative |
| P01347 | LLGFWLFLSQPCRARVSEEW  | Negative |
| P01347 | RVSEEWMDQVIQVCGRGYAR  | Negative |
| P01347 | VSEEWMDQVIQVCGRGYARA  | Negative |
| P01347 | MSSRLLLQLLGFWLFLSQPC  | Negative |
| P01347 | RLLLQLLGFWLFLSQPCRAR  | Negative |
| P01348 | FSYLLGVWLLLSQLPREIPG  | Negative |
| P01348 | GQSTNDFIKACGREL VRLWV | Negative |
| P01348 | PRLFSYLLGVWLLLSQLPRE  | Negative |
| P01348 | NDFIKACGREL VRLWVEICG | Negative |
| P01348 | PGQSTNDFIKACGREL VRLW | Negative |
| P01348 | IPGQSTNDFIKACGREL VRL | Negative |
| P01348 | MPRLFSYLLGVWLLLSQLPR  | Negative |
| P01348 | PREIPGQSTNDFIKACGREL  | Negative |
| P01348 | DFIKACGREL VRLWVEICGS | Negative |
| P01348 | STNDFIKACGREL VRLWVEI | Negative |

|        |                      |          |
|--------|----------------------|----------|
| P01348 | QSTNDFIKACGRELVRLWVE | Negative |
| P01348 | TNDFIKACGRELVRLWVEIC | Negative |
| P01348 | YLLGVWLLLSQLPREIPGQS | Negative |
| P01348 | WLLLSQLPREIPGQSTNDFI | Negative |
| P01348 | RLFSYLLGVWLLLSQLPREI | Negative |
| P01348 | LLLSQLPREIPGQSTNDFIK | Negative |
| P01348 | QLPREIPGQSTNDFIKACGR | Negative |
| P01348 | VWLLLSQLPREIPGQSTNDF | Negative |
| P01348 | LLSQLPREIPGQSTNDFIKA | Negative |
| P01348 | LLGVWLLLSQLPREIPGQST | Negative |
| P01348 | LFSYLLGVWLLLSQLPREIP | Negative |
| P01348 | SYLLGVWLLLSQLPREIPGQ | Negative |
| P01348 | LSQLPREIPGQSTNDFIKAC | Negative |
| P01348 | LPREIPGQSTNDFIKACGRE | Negative |
| P01348 | LGVWLLLSQLPREIPGQSTN | Negative |
| P01348 | FIKACGRELVRLWVEICGSV | Negative |
| P01348 | SQLPREIPGQSTNDFIKACG | Negative |
| P01348 | EIPGQSTNDFIKACGRELVR | Negative |
| P01348 | REIPGQSTNDFIKACGRELV | Negative |
| P01350 | EASWKPRSQQPDAPLGTGAN | Negative |
| P01350 | SQQPDAPLGTGANRDLELPW | Negative |
| P01350 | LAAFSEASWKPRSQQPDAPL | Negative |
| P01350 | IFALALAAFSEASWKPRSQQ | Negative |
| P01350 | QQPDAPLGTGANRDLELPWL | Negative |
| P01350 | VLIFALALAAFSEASWKPRS | Negative |
| P01350 | WKPRSQQPDAPLGTGANRDL | Negative |
| P01350 | QPDAPLGTGANRDLELPWLE | Negative |
| P01350 | QRLCVYVLIFALALAAFSEA | Negative |
| P01350 | FSEASWKPRSQQPDAPLGTG | Negative |
| P01350 | LALAAFSEASWKPRSQQPDA | Negative |
| P01350 | SWKPRSQQPDAPLGTGANRD | Negative |
| P01350 | PRSQQPDAPLGTGANRDLEL | Negative |
| P01350 | VYVLIFALALAAFSEASWKP | Negative |
| P01350 | RLCVYVLIFALALAAFSEAS | Negative |
| P01350 | ALALAAFSEASWKPRSQQPD | Negative |
| P01350 | SEASWKPRSQQPDAPLGTGA | Negative |
| P01350 | LIFALALAAFSEASWKPRSQ | Negative |
| P01350 | ALAAFSEASWKPRSQQPDAP | Negative |
| P01350 | AAFSEASWKPRSQQPDAPLG | Negative |
| P01350 | CVYVLIFALALAAFSEASWK | Negative |
| P01350 | FALALAAFSEASWKPRSQQP | Negative |
| P01350 | LCVYVLIFALALAAFSEASW | Negative |
| P01350 | MQRLCVYVLIFALALAAFSE | Negative |
| P01350 | ASWKPRSQQPDAPLGTGANR | Negative |
| P01350 | AFSEASWKPRSQQPDAPLGT | Negative |
| P01350 | KPRSQQPDAPLGTGANRDLE | Negative |



|        |                      |          |
|--------|----------------------|----------|
| P01350 | RSQQPDAPLGTGANRDLELP | Negative |
| P01350 | PDAPLGTGANRDLELPWLEQ | Negative |
| P01359 | RPAPGHPPPAGAVCLTGAQK | Negative |
| P01359 | PPAGAVCLTGAQKPAACRCS | Negative |
| P01359 | ACRCSRQDPKNRVNCGFPGI | Negative |
| P01359 | APGHPPPAGAVCLTGAQKPA | Negative |
| P01359 | PAACRCSRQDPKNRVNCGFP | Negative |
| P01359 | AQKPAACRCSRQDPKNRVNC | Negative |
| P01359 | AGAVCLTGAQKPAACRCSRQ | Negative |
| P01359 | PPPAGAVCLTGAQKPAACRC | Negative |
| P01359 | RCSRQDPKNRVNCGFPGITS | Negative |
| P01359 | KPAACRCSRQDPKNRVNCGF | Negative |
| P01359 | PQRPAPGHPPPAGAVCLTGA | Negative |
| P01359 | AACRCSRQDPKNRVNCGFPG | Negative |
| P01359 | HPPPAGAVCLTGAQKPAACR | Negative |
| P01359 | PAGAVCLTGAQKPAACRCSR | Negative |
| P01359 | QKPAACRCSRQDPKNRVNCG | Negative |
| P01359 | GAVCLTGAQKPAACRCSRQD | Negative |
| P01359 | GAQKPAACRCSRQDPKNRVN | Negative |
| P01359 | QRPAPGHPPPAGAVCLTGAQ | Negative |
| P01359 | CRCRQDPKNRVNCGFPGIT  | Negative |
| P01359 | VCLTGAQKPAACRCSRQDPK | Negative |
| P01359 | CLTGAQKPAACRCSRQDPKN | Negative |
| P01359 | AVCLTGAQKPAACRCSRQDP | Negative |
| P01359 | SRQDPKNRVNCGFPGITSDQ | Negative |
| P01359 | TGAQKPAACRCSRQDPKNRV | Negative |
| P01359 | LTGAQKPAACRCSRQDPKNR | Negative |
| P01359 | CSRQDPKNRVNCGFPGITSD | Negative |
| P01359 | EPQRPAPGHPPPAGAVCLTG | Negative |
| P01359 | PAPGHPPPAGAVCLTGAQKP | Negative |
| P01359 | GHPPPAGAVCLTGAQKPAAC | Negative |
| P01364 | DTDVGDELTNALSVLTDFK  | Negative |
| P01364 | VSIAVALLSQAAWSEEVFDD | Negative |
| P01364 | EEVFDDTDVGDELTNALSV  | Negative |
| P01364 | HLCLAVSIAVALLSQAAWSE | Negative |
| P01364 | LSQAAWSEEVFDDTDVGDEL | Negative |
| P01364 | LCLAVSIAVALLSQAAWSEE | Negative |
| P01364 | MQVLHLCLAVSIAVALLSQA | Negative |
| P01364 | AAWSEEVFDDTDVGDELNA  | Negative |
| P01364 | LHLCLAVSIAVALLSQAAWS | Negative |
| P01364 | LLSQAAWSEEVFDDTDVGDE | Negative |
| P01364 | SEEVFDDTDVGDELTNAL   | Negative |
| P01364 | FDDTDVGDELTNALSVLTD  | Negative |
| P01364 | TDVGDELTNALSVLTDFKD  | Negative |
| P01364 | EVFDDTDVGDELTNALSVL  | Negative |
| P01364 | VLHLCLAVSIAVALLSQA   | Negative |

|        |                       |          |
|--------|-----------------------|----------|
| P01364 | QAAWSEEVFDDTDVGDELTN  | Negative |
| P01364 | VFDDTDVGDELNALESVLT   | Negative |
| P01364 | DDTDVGDELNALESVLTDF   | Negative |
| P01364 | CLAVSIAVALLSQAAWSEEV  | Negative |
| P01364 | SQAAWSEEVFDDTDVGDELT  | Negative |
| P01364 | QVLHLCLAVSIAVALLSQA   | Negative |
| P01364 | LAVSIAVALLSQAAWSEEVF  | Negative |
| P01364 | AWSEEVFDDTDVGDELTNAL  | Negative |
| P01364 | WSEEVFDDTDVGDELNALE   | Negative |
| P01364 | AVALLSQAAWSEEVFDDTDV  | Negative |
| P01364 | ALLSQAAWSEEVFDDTDVGD  | Negative |
| P01364 | VALLSQAAWSEEVFDDTDVG  | Negative |
| P01364 | SIAVALLSQAAWSEEVFDDT  | Negative |
| P01364 | IAVALLSQAAWSEEVFDDTD  | Negative |
| P01379 | LGYTRECYNPHDTQTCPSG   | Negative |
| P01379 | LNPHDTQTCPSGQEICYVKS  | Negative |
| P01379 | CYNPHDTQTCPSGQEICYV   | Negative |
| P01379 | LDLGYTRECYNPHDTQTCP   | Negative |
| P01379 | KTLLTLVVVTIVCLDLGYT   | Negative |
| P01379 | GYTRECYNPHDTQTCPSGQ   | Negative |
| P01379 | HDTQTCPSGQEICYVKS WCN | Negative |
| P01379 | VVTIVCLDLGYTRECYNPH   | Negative |
| P01379 | VTIVCLDLGYTRECYNPHD   | Negative |
| P01379 | MKTLLTLVVVTIVCLDLGY   | Negative |
| P01379 | LLTLVVVTIVCLDLGYTRE   | Negative |
| P01379 | YTRECYNPHDTQTCPSGQE   | Negative |
| P01379 | PHDTQTCPSGQEICYVKS WC | Negative |
| P01379 | IVCLDLGYTRECYNPHDTQ   | Negative |
| P01379 | TIVCLDLGYTRECYNPHDT   | Negative |
| P01379 | LVVVTIVCLDLGYTRECYN   | Negative |
| P01379 | TLLTLVVVTIVCLDLGYTR   | Negative |
| P01379 | LTLVVVTIVCLDLGYTREC   | Negative |
| P01379 | NPHDTQTCPSGQEICYVKS W | Negative |
| P01379 | DTQTCPSGQEICYVKS WCNA | Negative |
| P01379 | VVVTIVCLDLGYTRECYNP   | Negative |
| P01379 | ECYNPHDTQTCPSGQEICY   | Negative |
| P01379 | LLTLVVVTIVCLDLGYTREC  | Negative |
| P01379 | DLGYTRECYNPHDTQTCPS   | Negative |
| P01379 | RECYNPHDTQTCPSGQEIC   | Negative |
| P01379 | CLDLGYTRECYNPHDTQTC   | Negative |
| P01379 | VCLDLGYTRECYNPHDTQT   | Negative |
| P01379 | TRECYNPHDTQTCPSGQEI   | Negative |
| P01379 | YNPHDTQTCPSGQEICYVK   | Negative |
| P01384 | LTLVVVTIVCLDLGDSLICY  | Negative |
| P01384 | LVVVTIVCLDLGDSLICYMG  | Negative |
| P01384 | KTPRTCPRGQNLCTKTWCD   | Negative |

|        |                        |          |
|--------|------------------------|----------|
| P01384 | GDSLICYMGPKTPRTCPRGQ   | Negative |
| P01384 | ICYMGPKTPRTCPRGQNL CY  | Negative |
| P01384 | VVTIVCLDLGDSLICYMGPK   | Negative |
| P01384 | LGDSLICYMGPKTPRTCPRG   | Negative |
| P01384 | LDLGDSLICYMGPKTPRTCP   | Negative |
| P01384 | DLGDSLICYMGPKTPRTCPR   | Negative |
| P01384 | LLLTLVVVTIVCLDLGDSLI   | Negative |
| P01384 | IVCLDLGDSLICYMGPKTPR   | Negative |
| P01384 | DSLICYMGPKTPRTCPRGQN   | Negative |
| P01384 | TIVCLDLGDSLICYMGPKTP   | Negative |
| P01384 | TLLLTLVVVTIVCLDLGDSL   | Negative |
| P01384 | VCLDLGDSLICYMGPKTPRT   | Negative |
| P01384 | CYMGPKTPRTCPRGQNL CYT  | Negative |
| P01384 | MGPKTPRTCPRGQNL CYTKT  | Negative |
| P01384 | SLICYMGPKTPRTCPRGQNL   | Negative |
| P01384 | GPKTPRTCPRGQNL CYTKTW  | Negative |
| P01384 | KTLLLTLVVVTIVCLDLGDS   | Negative |
| P01384 | PKTPRTCPRGQNL CYTKTWC  | Negative |
| P01384 | LICYMGPKTPRTCPRGQNL C  | Negative |
| P01384 | VTIVCLDLGDSLICYMGPKT   | Negative |
| P01384 | YMGPKTPRTCPRGQNL CYTK  | Negative |
| P01384 | LLTLVVVTIVCLDLGDSLIC   | Negative |
| P01384 | VVTIVCLDLGDSLICYMG P   | Negative |
| P01384 | MKTLLLTLVVVTIVCLDLGD   | Negative |
| P01384 | CLDLGDSLICYMGPKTPRTC   | Negative |
| P01384 | TPRTCPRGQNL CYTKTWCD A | Negative |
| P01398 | LVVTIVCLDLGYTRTCLIS    | Negative |
| P01398 | LLLTLVVVTIVCLDLGYTRT   | Negative |
| P01398 | LLTLVVVTIVCLDLGYTRTC   | Negative |
| P01398 | SSTPQTCPNGQDICFLKAQC   | Negative |
| P01398 | MKTLLLTLVVVTIVCLDLGY   | Negative |
| P01398 | IVCLDLGYTRTCLISPSSTP   | Negative |
| P01398 | TRTCLISPSSTPQTCPNGQD   | Negative |
| P01398 | CLDLGYTRTCLISPSSTPQT   | Negative |
| P01398 | VCLDLGYTRTCLISPSSTPQ   | Negative |
| P01398 | RTCLISPSSTPQTCPNGQDI   | Negative |
| P01398 | CLISPSSTPQTCPNGQDICF   | Negative |
| P01398 | LTLVVVTIVCLDLGYTRTCL   | Negative |
| P01398 | LGYTRTCLISPSSTPQTCPN   | Negative |
| P01398 | TLLLTLVVVTIVCLDLGYTR   | Negative |
| P01398 | YTRTCLISPSSTPQTCPNGQ   | Negative |
| P01398 | TCLISPSSTPQTCPNGQDIC   | Negative |
| P01398 | TIVCLDLGYTRTCLISPSST   | Negative |
| P01398 | PSSTPQTCPNGQDICFLKAQ   | Negative |
| P01398 | VVTIVCLDLGYTRTCLISP    | Negative |
| P01398 | ISPSSTPQTCPNGQDICFLK   | Negative |

|        |                       |          |
|--------|-----------------------|----------|
| P01398 | GYTRTCLISPSSTPQTCPNG  | Negative |
| P01398 | LISPSSTPQTCPNGQDICFL  | Negative |
| P01398 | KTLLLTLLVVVTIVCLDLGYT | Negative |
| P01398 | LDLGYTRTCLISPSSTPQTC  | Negative |
| P01398 | VTIVCLDLGYTRTCLISPSS  | Negative |
| P01398 | SPSSTPQTCPNGQDICFLKA  | Negative |
| P01398 | STPQTCPNGQDICFLKAQCD  | Negative |
| P01398 | VVTIVCLDLGYTRTCLISPS  | Negative |
| P01398 | DLGYTRTCLISPSSTPQTCP  | Negative |
| P01404 | KTLLLTLLVVVTIVCLDLAST | Negative |
| P01404 | SHKTPQPSATITCEEKTCYK  | Negative |
| P01404 | LLTLLVVVTIVCLDLASTMIC | Negative |
| P01404 | LTLLVVVTIVCLDLASTMICY | Negative |
| P01404 | CYSHKTPQPSATITCEEKTC  | Negative |
| P01404 | VCLDLASTMICYSHKTPQPS  | Negative |
| P01404 | DLASTMICYSHKTPQPSATI  | Negative |
| P01404 | KTPQPSATITCEEKTCYKKS  | Negative |
| P01404 | LASTMICYSHKTPQPSATIT  | Negative |
| P01404 | ICYSHKTPQPSATITCEEKT  | Negative |
| P01404 | LLVVVTIVCLDLASTMICYSH | Negative |
| P01404 | TMICYSHKTPQPSATITCEE  | Negative |
| P01404 | TLLLTLVVVTIVCLDLASTM  | Negative |
| P01404 | VTIVCLDLASTMICYSHKTP  | Negative |
| P01404 | STMICYSHKTPQPSATITCE  | Negative |
| P01404 | TIVCLDLASTMICYSHKTPQ  | Negative |
| P01404 | LDLASTMICYSHKTPQPSAT  | Negative |
| P01404 | TPQPSATITCEEKTCYKKSV  | Negative |
| P01404 | PQPSATITCEEKTCYKKSVR  | Negative |
| P01404 | IVCLDLASTMICYSHKTPQP  | Negative |
| P01404 | CLDLASTMICYSHKTPQPSA  | Negative |
| P01404 | LVVTIVCLDLASTMICYSHK  | Negative |
| P01404 | YSHKTPQPSATITCEEKTCY  | Negative |
| P01404 | ASTMICYSHKTPQPSATITC  | Negative |
| P01404 | MICYSHKTPQPSATITCEEK  | Negative |
| P01404 | VVTIVCLDLASTMICYSHKT  | Negative |
| P01404 | MKTLLLTLLVVVTIVCLDLAS | Negative |
| P01404 | HKTPQPSATITCEEKTCYKK  | Negative |
| P01404 | LLLTLVVVTIVCLDLASTMI  | Negative |
| P01412 | DLGYSLICFNQETYRPETTT  | Negative |
| P01412 | YRPETTTTTPDGEDTCYSTF  | Negative |
| P01412 | LICFNQETYRPETTTTCPDG  | Negative |
| P01412 | CFNQETYRPETTTTCPDGED  | Negative |
| P01412 | LTLVVVTIVCLDLGYSLICF  | Negative |
| P01412 | CLDLGYSLICFNQETYRPE   | Negative |
| P01412 | VCLDLGYSLICFNQETYRPE  | Negative |
| P01412 | GYSLICFNQETYRPETTTTTC | Negative |

|        |                       |          |
|--------|-----------------------|----------|
| P01412 | ETYRPETTTTTCPDGEDTCYS | Negative |
| P01412 | FNQETYRPETTTTTCPDGEDT | Negative |
| P01412 | IVCLDLGYSLICFNQETYRP  | Negative |
| P01412 | NQETYRPETTTTTCPDGEDTC | Negative |
| P01412 | YSLICFNQETYRPETTTTTC  | Negative |
| P01412 | ICFNQETYRPETTTTTCPDGE | Negative |
| P01412 | VVTIVCLDLGYSLICFNQET  | Negative |
| P01412 | LLTLVVVTIVCLDLGYSLIC  | Negative |
| P01412 | VTIVCLDLGYSLICFNQETY  | Negative |
| P01412 | LGYSLICFNQETYRPETTTT  | Negative |
| P01412 | TLLLTLVVVTIVCLDLGYSL  | Negative |
| P01412 | SLICFNQETYRPETTTTTC   | Negative |
| P01412 | KTLLLTLVVVTIVCLDLGYS  | Negative |
| P01412 | TYRPETTTTTCPDGEDTCYST | Negative |
| P01412 | LLLTLVVVTIVCLDLGYSLI  | Negative |
| P01412 | QETYRPETTTTTCPDGEDTCY | Negative |
| P01412 | LDLGYSLICFNQETYRPETT  | Negative |
| P01412 | VVVTIVCLDLGYSLICFNQE  | Negative |
| P01412 | TIVCLDLGYSLICFNQETYR  | Negative |
| P01412 | MKTLLLTLVVVTIVCLDLGY  | Negative |
| P01412 | LVVVTIVCLDLGYSLICFNQ  | Negative |
| P01443 | IVCLDLGYTRKCNKLVPLFY  | Negative |
| P01443 | LFYKTCPAGKNLCYKMFMVS  | Negative |
| P01443 | VTIVCLDLGYTRKCNKLVPL  | Negative |
| P01443 | CLDLGYTRKCNKLVPLFYKT  | Negative |
| P01443 | TIVCLDLGYTRKCNKLVPLF  | Negative |
| P01443 | VPLFYKTCPAGKNLCYKMFM  | Negative |
| P01443 | KTLLLTLVVVTIVCLDLGYT  | Negative |
| P01443 | LGYTRKCNKLVPLFYKTCPA  | Negative |
| P01443 | NKLVPLFYKTCPAGKNLCYK  | Negative |
| P01443 | LLTLVVVTIVCLDLGYTRKC  | Negative |
| P01443 | GYTRKCNKLVPLFYKTCPAG  | Negative |
| P01443 | PLFYKTCPAGKNLCYKMFMV  | Negative |
| P01443 | VVVTIVCLDLGYTRKCNKLV  | Negative |
| P01443 | KLVPLFYKTCPAGKNLCYKM  | Negative |
| P01443 | TRKCNKLVPLFYKTCPAGKN  | Negative |
| P01443 | LVPLFYKTCPAGKNLCYKMF  | Negative |
| P01443 | LVVVTIVCLDLGYTRKCNKL  | Negative |
| P01443 | KCNKLVPLFYKTCPAGKNLC  | Negative |
| P01443 | LTLVVVTIVCLDLGYTRKCN  | Negative |
| P01443 | CNKLVPLFYKTCPAGKNLCY  | Negative |
| P01443 | TLLLTLVVVTIVCLDLGYTR  | Negative |
| P01443 | RKCNKLVPLFYKTCPAGKNL  | Negative |
| P01443 | VVTIVCLDLGYTRKCNKLV   | Negative |
| P01443 | VCLDLGYTRKCNKLVPLFYK  | Negative |
| P01443 | YTRKCNKLVPLFYKTCPAGK  | Negative |

|        |                      |          |
|--------|----------------------|----------|
| P01443 | LDLGYTRKCNKLVPLFYKTC | Negative |
| P01443 | DLGYTRKCNKLVPLFYKTCP | Negative |
| P01443 | LLTLVVVTIVCLDLGYTRK  | Negative |
| P01443 | MKTLLTLVVVTIVCLDLGY  | Negative |
| P01477 | KRCHKKGGHCFPKTVICLPP | Negative |
| P01477 | NAYKRCHKKGGHCFPKTVIC | Negative |
| P01477 | AYKRCHKKGGHCFPKTVICL | Negative |
| P01477 | EPGNAYKRCHKKGGHCFPKT | Negative |
| P01477 | MKILYLLFAFLFLAFLSEPG | Negative |
| P01477 | PGNAYKRCHKKGGHCFPKTV | Negative |
| P01477 | ILYLLFAFLFLAFLSEPGNA | Negative |
| P01477 | HKKGGHCFPKTVICLPPSSD | Negative |
| P01477 | LFAFLFLAFLSEPGNAYKRC | Negative |
| P01477 | SEPGNAYKRCHKKGGHCFPK | Negative |
| P01477 | FLSEPGNAYKRCHKKGGHCF | Negative |
| P01477 | LAFLSEPGNAYKRCHKKGGH | Negative |
| P01477 | LYLLFAFLFLAFLSEPGNAY | Negative |
| P01477 | LLFAFLFLAFLSEPGNAYKR | Negative |
| P01477 | YKRCHKKGGHCFPKTVICLP | Negative |
| P01477 | FLAFLSEPGNAYKRCHKKGG | Negative |
| P01477 | CHKKGGHCFPKTVICLPPSS | Negative |
| P01477 | LSEPGNAYKRCHKKGGHCFP | Negative |
| P01477 | LFLAFLSEPGNAYKRCHKKG | Negative |
| P01477 | KKGGHCFPKTVICLPPSSDF | Negative |
| P01477 | YLLFAFLFLAFLSEPGNAYK | Negative |
| P01477 | RCHKKGGHCFPKTVICLPPS | Negative |
| P01477 | AFLSEPGNAYKRCHKKGGHC | Negative |
| P01477 | GNAYKRCHKKGGHCFPKTVI | Negative |
| P01477 | AFLFLAFLSEPGNAYKRCHK | Negative |
| P01477 | FLFLAFLSEPGNAYKRCHKK | Negative |
| P01477 | KILYLLFAFLFLAFLSEPGN | Negative |
| P01477 | KGGHCFPKTVICLPPSSDFG | Negative |
| P01477 | GGHCFPKTVICLPPSSDFGK | Negative |
| P01479 | NCVYHCVPPCDGLCKKNNGS | Negative |
| P01479 | GYIVYPNNCVYHCVPPCDGL | Negative |
| P01479 | YIVYPNNCVYHCVPPCDGLC | Negative |
| P01479 | VESKRDGYIVYPNNCVYHCV | Negative |
| P01479 | ALLLMIGVESKRDGYIVYPN | Negative |
| P01479 | NNCVYHCVPPCDGLCKKNNG | Negative |
| P01479 | GVESKRDGYIVYPNNCVYHC | Negative |
| P01479 | NYLVMISLALLLMIGVESKR | Negative |
| P01479 | KRDGYIVYPNNCVYHCVPPC | Negative |
| P01479 | LVMISLALLLMIGVESKRDG | Negative |
| P01479 | IVYPNNCVYHCVPPCDGLCK | Negative |
| P01479 | LALLLMIGVESKRDGYIVYP | Negative |
| P01479 | MISLALLLMIGVESKRDGYI | Negative |

|        |                       |          |
|--------|-----------------------|----------|
| P01479 | YPNNCVYHCVPPCDGLCKKN  | Negative |
| P01479 | DGYIVYPNNCVYHCVPPCDG  | Negative |
| P01479 | LLMIGVESKRDGYIVYPNN   | Negative |
| P01479 | LLMIGVESKRDGYIVYPNNC  | Negative |
| P01479 | SLALLLMIGVESKRDGYIVY  | Negative |
| P01479 | SKRDGYIVYPNNCVYHCVPP  | Negative |
| P01479 | YLV MISLALLLMIGVESKRD | Negative |
| P01479 | PNNCVYHCVPPCDGLCKKNG  | Negative |
| P01479 | VYPNNCVYHCVPPCDGLCKK  | Negative |
| P01479 | ESKRDGYIVYPNNCVYHCV   | Negative |
| P01479 | IGVESKRDGYIVYPNNCVYH  | Negative |
| P01479 | MNYLVMISLALLLMIGVESK  | Negative |
| P01479 | ISLALLLMIGVESKRDGYIV  | Negative |
| P01479 | LMIGVESKRDGYIVYPNNCV  | Negative |
| P01479 | RDGYIVYPNNCVYHCVPPCD  | Negative |
| P01479 | MIGVESKRDGYIVYPNNCVY  | Negative |
| P01480 | VDSKNCVYHCVPPCDGLCKK  | Negative |
| P01480 | LLMTGVESVRDGYIVDSKNC  | Negative |
| P01480 | LMTGVESVRDGYIVDSKNCV  | Negative |
| P01480 | SVRDGYIVDSKNCVYHCVPP  | Negative |
| P01480 | LALLMTGVESVRDGYIVDS   | Negative |
| P01480 | YIVDSKNCVYHCVPPCDGLC  | Negative |
| P01480 | SLALLMTGVESVRDGYIVD   | Negative |
| P01480 | MISLALLMTGVESVRDGYI   | Negative |
| P01480 | ALLMTGVESVRDGYIVDSK   | Negative |
| P01480 | GYIVDSKNCVYHCVPPCDGL  | Negative |
| P01480 | NCVYHCVPPCDGLCKKNGAK  | Negative |
| P01480 | MTGVESVRDGYIVDSKNCVY  | Negative |
| P01480 | VRDGYIVDSKNCVYHCVPPC  | Negative |
| P01480 | IVDSKNCVYHCVPPCDGLCK  | Negative |
| P01480 | DGYIVDSKNCVYHCVPPCDG  | Negative |
| P01480 | MNYLVMISLALLMTGVESV   | Negative |
| P01480 | YLV MISLALLMTGVESVRD  | Negative |
| P01480 | ISLALLMTGVESVRDGYIV   | Negative |
| P01480 | ESVRDGYIVDSKNCVYHCV   | Negative |
| P01480 | NYLVMISLALLMTGVESVR   | Negative |
| P01480 | VESVRDGYIVDSKNCVYHCV  | Negative |
| P01480 | GVESVRDGYIVDSKNCVYHC  | Negative |
| P01480 | DSKNCVYHCVPPCDGLCKKN  | Negative |
| P01480 | KNCVYHCVPPCDGLCKKNGA  | Negative |
| P01480 | LLLMTGVESVRDGYIVDSKN  | Negative |
| P01480 | LVMISLALLMTGVESVRDG   | Negative |
| P01480 | SKNCVYHCVPPCDGLCKKNG  | Negative |
| P01480 | RDGYIVDSKNCVYHCVPPCD  | Negative |
| P01480 | TGVESVRDGYIVDSKNCVYH  | Negative |
| P01484 | VTGVESVKDGYIVDDVNCTY  | Negative |

|        |                       |          |
|--------|-----------------------|----------|
| P01484 | KDGYIVDDVNCTYFCGRNAY  | Negative |
| P01484 | GYIVDDVNCTYFCGRNAYCN  | Negative |
| P01484 | VESVKDGYIVDDVNCTYFCG  | Negative |
| P01484 | VKDGYIVDDVNCTYFCGRNA  | Negative |
| P01484 | SLALLFVTGVESVKDGYIVD  | Negative |
| P01484 | NCTYFCGRNAYCNEECTKLK  | Negative |
| P01484 | MISLALLFVTGVESVKDGYI  | Negative |
| P01484 | YIVDDVNCTYFCGRNAYCNE  | Negative |
| P01484 | LFVTGVESVKDGYIVDDVNC  | Negative |
| P01484 | ALLFVTGVESVKDGYIVDDV  | Negative |
| P01484 | VDDVNCTYFCGRNAYCNEEC  | Negative |
| P01484 | ISLALLFVTGVESVKDGYIV  | Negative |
| P01484 | GVESVKDGYIVDDVNCTYFC  | Negative |
| P01484 | TGVESVKDGYIVDDVNCTYF  | Negative |
| P01484 | YLV MISLALLFVTGVESVKD | Negative |
| P01484 | ESVKDGYIVDDVNCTYFCGR  | Negative |
| P01484 | LVMISLALLFVTGVESVKDG  | Negative |
| P01484 | FVTGVESVKDGYIVDDVNCT  | Negative |
| P01484 | DVNCTYFCGRNAYCNEECTK  | Negative |
| P01484 | SVKDGYIVDDVNCTYFCGRN  | Negative |
| P01484 | DGYIVDDVNCTYFCGRNAYC  | Negative |
| P01484 | IVDDVNCTYFCGRNAYCNEE  | Negative |
| P01484 | NYLV MISLALLFVTGVESVK | Negative |
| P01484 | DDVNCTYFCGRNAYCNEECT  | Negative |
| P01484 | VNCTYFCGRNAYCNEECTKL  | Negative |
| P01484 | LALLFVTGVESVKDGYIVDD  | Negative |
| P01484 | MNYLV MISLALLFVTGVESV | Negative |
| P01484 | LLFVTGVESVKDGYIVDDVN  | Negative |
| P01491 | KTGCKKTCYKLGENDFCNRE  | Negative |
| P01491 | VEKTGCKKTCYKLGENDFCN  | Negative |
| P01491 | TACLVLIGTVWAKDGYLVEK  | Negative |
| P01491 | ACLVLIGTVWAKDGYLVEKT  | Negative |
| P01491 | TVWAKDGYLVEKTGCKKTCY  | Negative |
| P01491 | MNSLLMITACLVLIGTVWAK  | Negative |
| P01491 | TGCKKTCYKLGENDFCNREC  | Negative |
| P01491 | MITACLVLIGTVWAKDGYLV  | Negative |
| P01491 | LVLIGTVWAKDGYLVEKTGC  | Negative |
| P01491 | ITACLVLIGTVWAKDGYLVE  | Negative |
| P01491 | IGTVWAKDGYLVEKTGCKKT  | Negative |
| P01491 | KDGYLVEKTGCKKTCYKLGE  | Negative |
| P01491 | LLMITACLVLIGTVWAKDGY  | Negative |
| P01491 | AKDGYLVEKTGCKKTCYKLG  | Negative |
| P01491 | WAKDGYLVEKTGCKKTCYKL  | Negative |
| P01491 | SLLMITACLVLIGTVWAKDG  | Negative |
| P01491 | GTVWAKDGYLVEKTGCKKTC  | Negative |
| P01491 | LVEKTGCKKTCYKLGENDFC  | Negative |



|        |                       |          |
|--------|-----------------------|----------|
| P01491 | CKKTCYKLGENDFCNRECKW  | Negative |
| P01491 | VLIGTVWAKDGYLVEKTGCK  | Negative |
| P01491 | YLVEKTGCKKTCYKLGENDF  | Negative |
| P01491 | EKTGCKKTCYKLGENDFCNR  | Negative |
| P01491 | LIGTVWAKDGYLVEKTGCKK  | Negative |
| P01491 | VWAKDGYLVEKTGCKKTCYK  | Negative |
| P01491 | CLVLIGTVWAKDGYLVEKTG  | Negative |
| P01491 | NSLLMITACLVLIGTVWAKD  | Negative |
| P01491 | GYLVEKTGCKKTCYKLGEND  | Negative |
| P01491 | DGYLVEKTGCKKTCYKLGEND | Negative |
| P01491 | GCKKTCYKLGENDFCNRECK  | Negative |
| P01492 | VKKSDGCKYDCFWLGKNEHC  | Negative |
| P01492 | VGTWAKEGYLVKKSDGCKY   | Negative |
| P01492 | KEGYLVKKSDGCKYDCFWLG  | Negative |
| P01492 | MNSLLIITACFALVGTWAK   | Negative |
| P01492 | LLIITACFALVGTWAKEGY   | Negative |
| P01492 | ALVGTWAKEGYLVKKSDGC   | Negative |
| P01492 | KKSDGCKYDCFWLGKNEHCD  | Negative |
| P01492 | WAKEGYLVKKSDGCKYDCFW  | Negative |
| P01492 | SLLIITACFALVGTWAKEG   | Negative |
| P01492 | GCKYDCFWLGKNEHCDTECK  | Negative |
| P01492 | CFALVGTWAKEGYLVKKSD   | Negative |
| P01492 | LVKKSDGCKYDCFWLGKNEH  | Negative |
| P01492 | GTWAKEGYLVKKSDGCKYD   | Negative |
| P01492 | ACFALVGTWAKEGYLVKKS   | Negative |
| P01492 | IITACFALVGTWAKEGYLV   | Negative |
| P01492 | VWAKEGYLVKKSDGCKYDCF  | Negative |
| P01492 | FALVGTWAKEGYLVKKSDG   | Negative |
| P01492 | ITACFALVGTWAKEGYLVK   | Negative |
| P01492 | AKEGYLVKKSDGCKYDCFWL  | Negative |
| P01492 | TVWAKEGYLVKKSDGCKYDC  | Negative |
| P01492 | SDGCKYDCFWLGKNEHCDTE  | Negative |
| P01492 | EGYLVKKSDGCKYDCFWLGK  | Negative |
| P01492 | YLVKKSDGCKYDCFWLGKNE  | Negative |
| P01492 | TACFALVGTWAKEGYLVKK   | Negative |
| P01492 | LVGTWAKEGYLVKKSDGCK   | Negative |
| P01492 | NSLLIITACFALVGTWAKE   | Negative |
| P01492 | DGCKYDCFWLGKNEHCDTEC  | Negative |
| P01492 | GYLVKKSDGCKYDCFWLGKN  | Negative |
| P01492 | KSDGCKYDCFWLGKNEHCDT  | Negative |
| P01493 | MNSLLIITACLFLIGTVWAK  | Negative |
| P01493 | ITACLFLIGTVWAKEGYLVN  | Negative |
| P01493 | GYLVNKSTGCKYGCLKLGEN  | Negative |
| P01493 | VWAKEGYLVNKSTGCKYGCL  | Negative |
| P01493 | FLIGTVWAKEGYLVNKSTGC  | Negative |
| P01493 | LIGTVWAKEGYLVNKSTGCK  | Negative |

|        |                      |          |
|--------|----------------------|----------|
| P01493 | GTVWAKEGYLVNKSTGCKYG | Negative |
| P01493 | TGCKYGCLKLGENEGCDKEC | Negative |
| P01493 | NSLLIITACLFLIGTVWAKE | Negative |
| P01493 | LVNKSTGCKYGCLKLGENEG | Negative |
| P01493 | LLIITACLFLIGTVWAKEGY | Negative |
| P01493 | TVWAKEGYLVNKSTGCKYGC | Negative |
| P01493 | STGCKYGCLKLGENEGCDKE | Negative |
| P01493 | WAKEGYLVNKSTGCKYGCLK | Negative |
| P01493 | EGYLVNKSTGCKYGCLKLGE | Negative |
| P01493 | YLVNKSTGCKYGCLKLGENE | Negative |
| P01493 | NKSTGCKYGCLKLGENEGCD | Negative |
| P01493 | ACLFLIGTVWAKEGYLVNKS | Negative |
| P01493 | LFLIGTVWAKEGYLVNKSTG | Negative |
| P01493 | IITACLFLIGTVWAKEGYLV | Negative |
| P01493 | TACLFLIGTVWAKEGYLVNK | Negative |
| P01493 | CLFLIGTVWAKEGYLVNKST | Negative |
| P01493 | AKEGYLVNKSTGCKYGCLKL | Negative |
| P01493 | SLLIITACLFLIGTVWAKEG | Negative |
| P01493 | IGTVWAKEGYLVNKSTGCKY | Negative |
| P01493 | VNKSTGCKYGCLKLGENEGC | Negative |
| P01493 | KEGYLVNKSTGCKYGCLKLG | Negative |
| P01493 | KSTGCKYGCLKLGENEGCDK | Negative |
| P01493 | GCKYGCLKLGENEGCDKECK | Negative |
| P01494 | VNKSTGCKYGCLKLGENEGC | Negative |
| P01494 | MNSLLMITACLFLIGTVWAK | Negative |
| P01494 | NKSTGCKYGCLKLGENEGCD | Negative |
| P01494 | ACLFLIGTVWAKEGYLVNKS | Negative |
| P01494 | GTVWAKEGYLVNKSTGCKYG | Negative |
| P01494 | SLLMITACLFLIGTVWAKEG | Negative |
| P01494 | TGCKYGCLKLGENEGCDKEC | Negative |
| P01494 | KSTGCKYGCLKLGENEGCDK | Negative |
| P01494 | VWAKEGYLVNKSTGCKYGCL | Negative |
| P01494 | KEGYLVNKSTGCKYGCLKLG | Negative |
| P01494 | YLVNKSTGCKYGCLKLGENE | Negative |
| P01494 | LLMITACLFLIGTVWAKEGY | Negative |
| P01494 | CLFLIGTVWAKEGYLVNKST | Negative |
| P01494 | WAKEGYLVNKSTGCKYGCLK | Negative |
| P01494 | GYLVNKSTGCKYGCLKLGEN | Negative |
| P01494 | LFLIGTVWAKEGYLVNKSTG | Negative |
| P01494 | TVWAKEGYLVNKSTGCKYGC | Negative |
| P01494 | ITACLFLIGTVWAKEGYLVN | Negative |
| P01494 | AKEGYLVNKSTGCKYGCLKL | Negative |
| P01494 | EGYLVNKSTGCKYGCLKLGE | Negative |
| P01494 | IGTVWAKEGYLVNKSTGCKY | Negative |
| P01494 | STGCKYGCLKLGENEGCDKE | Negative |
| P01494 | TACLFLIGTVWAKEGYLVNK | Negative |

|        |                      |          |
|--------|----------------------|----------|
| P01494 | FLIGTVWAKEGYLVNKSTGC | Negative |
| P01494 | NSLLMITACLFLIGTVWAKE | Negative |
| P01494 | GCKYGCLKLGENEGCDKECK | Negative |
| P01494 | MITACLFLIGTVWAKEGYLV | Negative |
| P01494 | LVNKSTGCKYGCLKLGENEG | Negative |
| P01494 | LIGTVWAKEGYLVNKSTGCK | Negative |
| P01495 | LLIITACLALIGTVWAKEGY | Negative |
| P01495 | KNTGCKYECLKLGDNDYCLR | Negative |
| P01495 | EGYLVDKNTGCKYECLKLGD | Negative |
| P01495 | ALIGTVWAKEGYLVDKNTGC | Negative |
| P01495 | GCKYECLKLGDNDYCLRECK | Negative |
| P01495 | IGTVWAKEGYLVDKNTGCKY | Negative |
| P01495 | TGCKYECLKLGDNDYCLREC | Negative |
| P01495 | DKNTGCKYECLKLGDNDYCL | Negative |
| P01495 | ACLALIGTVWAKEGYLVDKN | Negative |
| P01495 | CKYECLKLGDNDYCLRECKQ | Negative |
| P01495 | TACLALIGTVWAKEGYLVDK | Negative |
| P01495 | YLVDKNTGCKYECLKLGDND | Negative |
| P01495 | TVWAKEGYLVDKNTGCKYEC | Negative |
| P01495 | KYECLKLGDNDYCLRECKQQ | Negative |
| P01495 | YECLKLGDNDYCLRECKQQY | Negative |
| P01495 | VDKNTGCKYECLKLGDNDYC | Negative |
| P01495 | WAKEGYLVDKNTGCKYECLK | Negative |
| P01495 | CLALIGTVWAKEGYLVDKNT | Negative |
| P01495 | VWAKEGYLVDKNTGCKYECL | Negative |
| P01495 | NTGCKYECLKLGDNDYCLRE | Negative |
| P01495 | AKEGYLVDKNTGCKYECLKL | Negative |
| P01495 | LALIGTVWAKEGYLVDKNTG | Negative |
| P01495 | GYLVDKNTGCKYECLKLGDN | Negative |
| P01495 | ITACLALIGTVWAKEGYLV  | Negative |
| P01495 | LIGTVWAKEGYLVDKNTGCK | Negative |
| P01495 | GTVWAKEGYLVDKNTGCKYE | Negative |
| P01495 | LVDKNTGCKYECLKLGDNDY | Negative |
| P01495 | KEGYLVDKNTGCKYECLKL  | Negative |
| P01495 | IITACLALIGTVWAKEGYLV | Negative |
| P01497 | KNGYAVDSSGKAPECLLSNY | Negative |
| P01497 | VLPIMGVFGKKNGYAVDSSG | Negative |
| P01497 | LVVLPIMGVFGKKNGYAVDS | Negative |
| P01497 | KAPECLLSNYCNNECTKVHY | Negative |
| P01497 | AVDSSGKAPECLLSNYCNNE | Negative |
| P01497 | GKKNKYAVDSSGKAPECLLS | Negative |
| P01497 | KKNKYAVDSSGKAPECLLSN | Negative |
| P01497 | YAVDSSGKAPECLLSNYCNN | Negative |
| P01497 | GKAPECLLSNYCNNECTKVH | Negative |
| P01497 | IMGVFGKKNGYAVDSSGKAP | Negative |
| P01497 | FLVVLPIMGVFGKKNGYAVD | Negative |

|        |                      |          |
|--------|----------------------|----------|
| P01497 | DSSGKAPECLLSNYCNNECT | Negative |
| P01497 | VVLPIMGVFGKKNGYAVDSS | Negative |
| P01497 | LLFLVVLPIMGVFGKKNGYA | Negative |
| P01497 | FLLLFLVVLPIMGVFGKKNG | Negative |
| P01497 | NGYAVDSSGKAPECLLSNYC | Negative |
| P01497 | KFLLLFLVVLPIMGVFGKKN | Negative |
| P01497 | GYAVDSSGKAPECLLSNYCN | Negative |
| P01497 | LFLVVLPIMGVFGKKNGYAV | Negative |
| P01497 | SSGKAPECLLSNYCNNECTK | Negative |
| P01497 | SGKAPECLLSNYCNNECTKV | Negative |
| P01497 | GVFGKKNGYAVDSSGKAPEC | Negative |
| P01497 | VDSSGKAPECLLSNYCNNEC | Negative |
| P01497 | MGVFGKKNGYAVDSSGKAPE | Negative |
| P01497 | FGKKNGYAVDSSGKAPECLL | Negative |
| P01497 | VFGKKNGYAVDSSGKAPECL | Negative |
| P01497 | PIMGVFGKKNGYAVDSSGKA | Negative |
| P01497 | LPIMGVFGKKNGYAVDSSGK | Negative |
| P01497 | MKFLLLFLVVLPIMGVFGKK | Negative |
| P01499 | TFFFLSVILITSYFVTPTMS | Negative |
| P01499 | FVTPTMSIKCNCKRHVIKPH | Negative |
| P01499 | VTPTMSIKCNCKRHVIKPHI | Negative |
| P01499 | FFFLSVILITSYFVTPTMSI | Negative |
| P01499 | SYFVTPTMSIKCNCKRHVIK | Negative |
| P01499 | MSIKCNCKRHVIKPHICRKI | Negative |
| P01499 | LITSYFVTPTMSIKCNCKRH | Negative |
| P01499 | LRCTFFFLSVILITSYFVTP | Negative |
| P01499 | SMLRCTFFFLSVILITSYFV | Negative |
| P01499 | TPTMSIKCNCKRHVIKPHIC | Negative |
| P01499 | IKCNCKRHVIKPHICRKICG | Negative |
| P01499 | RCTFFFLSVILITSYFVTPT | Negative |
| P01499 | VILITSYFVTPTMSIKCNCK | Negative |
| P01499 | ISMLRCTFFFLSVILITSYF | Negative |
| P01499 | SIKNCKRHVIKPHICRKIC  | Negative |
| P01499 | FFLSVILITSYFVTPTMSIK | Negative |
| P01499 | YFVTPTMSIKCNCKRHVIKP | Negative |
| P01499 | PTMSIKCNCKRHVIKPHICR | Negative |
| P01499 | CTFFFLSVILITSYFVTPTM | Negative |
| P01499 | FLSVILITSYFVTPTMSIKC | Negative |
| P01499 | ILITSYFVTPTMSIKCNCKR | Negative |
| P01499 | LSVILITSYFVTPTMSIKCN | Negative |
| P01499 | CNCKRHVIKPHICRKICGKN | Negative |
| P01499 | TSYFVTPTMSIKCNCKRHVI | Negative |
| P01499 | MISMLRCTFFFLSVILITSY | Negative |
| P01499 | TMSIKCNCKRHVIKPHICRK | Negative |
| P01499 | KCNCKRHVIKPHICRKICGK | Negative |
| P01499 | ITSYFVTPTMSIKCNCKRHV | Negative |

|        |                      |          |
|--------|----------------------|----------|
| P01499 | MLRCTFFFLSVILITSYFVT | Negative |
| P01538 | LLVSQVESKSCCPNTTGRNI | Negative |
| P01538 | MEVVRGSSLVLLVLLLGALL | Negative |
| P01538 | SLVLLVLLLGALLVSQVESK | Negative |
| P01538 | SCCPNTTGRNIYNACRLTGA | Negative |
| P01538 | KSCCPNTTGRNIYNACRLTG | Negative |
| P01538 | LLVLLLGALLVSQVESKSCC | Negative |
| P01538 | SSLVLLVLLLGALLVSQVES | Negative |
| P01538 | GALLVSQVESKSCCPNTTGR | Negative |
| P01538 | QVESKSCCPNTTGRNIYNAC | Negative |
| P01538 | LVSQVESKSCCPNTTGRNIY | Negative |
| P01538 | CPNTTGRNIYNACRLTGAPR | Negative |
| P01538 | LLGALLVSQVESKSCCPNTT | Negative |
| P01538 | VESKSCCPNTTGRNIYNACR | Negative |
| P01538 | LLLGALLVSQVESKSCCPNT | Negative |
| P01538 | LVLLVLLLGALLVSQVESKS | Negative |
| P01538 | VLLLGALLVSQVESKSCCPN | Negative |
| P01538 | VRGSSLVLLVLLLGALLVSQ | Negative |
| P01538 | SKSCCPNTTGRNIYNACRLT | Negative |
| P01538 | VVRGSSLVLLVLLLGALLVS | Negative |
| P01538 | SQVESKSCCPNTTGRNIYNA | Negative |
| P01538 | RGSSLVLLVLLLGALLVSQV | Negative |
| P01538 | CCPNTTGRNIYNACRLTGAP | Negative |
| P01538 | ESKSCCPNTTGRNIYNACRL | Negative |
| P01538 | EVVRGSSLVLLVLLLGALLV | Negative |
| P01538 | LGALLVSQVESKSCCPNTTG | Negative |
| P01538 | VLLVLLLGALLVSQVESKSC | Negative |
| P01538 | ALLVSQVESKSCCPNTTGRN | Negative |
| P01538 | GSSLVLLVLLLGALLVSQVE | Negative |
| P01538 | VSQVESKSCCPNTTGRNIYN | Negative |
| P01543 | ILGLVLEQVQVEGKSCCKST | Negative |
| P01543 | EGKSCCKSTLGRNCYNLCRA | Negative |
| P01543 | LKGVMVCLLILGLVLEQVQV | Negative |
| P01543 | CLLILGLVLEQVQVEGKSCC | Negative |
| P01543 | GLKGVMVCLLILGLVLEQVQ | Negative |
| P01543 | LEQVQVEGKSCCKSTLGRNC | Negative |
| P01543 | VCLLILGLVLEQVQVEGKSC | Negative |
| P01543 | GLVLEQVQVEGKSCCKSTLG | Negative |
| P01543 | QVEGKSCCKSTLGRNCYNLC | Negative |
| P01543 | GVMVCLLILGLVLEQVQVEG | Negative |
| P01543 | KSCCKSTLGRNCYNLCRARG | Negative |
| P01543 | MGSKGLKGVMVCLLILGLVL | Negative |
| P01543 | VLEQVQVEGKSCCKSTLGRN | Negative |
| P01543 | SKGLKGVMVCLLILGLVLEQ | Negative |
| P01543 | MVCLLILGLVLEQVQVEGKS | Negative |
| P01543 | CCKSTLGRNCYNLCRARGAQ | Negative |

|        |                       |          |
|--------|-----------------------|----------|
| P01543 | EQVQVEGKSCCKSTLGRNCY  | Negative |
| P01543 | GKSCCKSTLGRNCYNLCRAR  | Negative |
| P01543 | SCCKSTLGRNCYNLCRARGA  | Negative |
| P01543 | LVLEQVQVEGKSCCKSTLGR  | Negative |
| P01543 | VQVEGKSCCKSTLGRNCYNL  | Negative |
| P01543 | KGLKGVMVCLLILGLVLEQV  | Negative |
| P01543 | GSKGLKGVMVCLLILGLVLE  | Negative |
| P01543 | QVQVEGKSCCKSTLGRNCYN  | Negative |
| P01543 | VEGKSCCKSTLGRNCYNLCR  | Negative |
| P01543 | KGVMVCLLILGLVLEQVQVE  | Negative |
| P01543 | LILGLVLEQVQVEGKSCCKS  | Negative |
| P01543 | LGLVLEQVQVEGKSCCKSTL  | Negative |
| P01543 | VMVCLLILGLVLEQVQVEGK  | Negative |
| P01544 | VEGKSCCRSTLGRNCYNLCR  | Negative |
| P01544 | CCRSTLGRNCYNLCRARGAQ  | Negative |
| P01544 | KSCCRSTLGRNCYNLCRARG  | Negative |
| P01544 | QVEGKSCCRSTLGRNCYNLC  | Negative |
| P01544 | QLQVEGKSCCRSTLGRNCYN  | Negative |
| P01544 | EGKSCCRSTLGRNCYNLCRA  | Negative |
| P01544 | YNLCRARGAQKLCAGVCRCK  | Negative |
| P01544 | LILGLVLEQLQVEGKSCCRS  | Negative |
| P01544 | LGRNCYNLCRARGAQKLCAG  | Negative |
| P01544 | TLGRNCYNLCRARGAQKLCA  | Negative |
| P01544 | STLGRNCYNLCRARGAQKLC  | Negative |
| P01544 | EQLQVEGKSCCRSTLGRNCY  | Negative |
| P01544 | GRNCYNLCRARGAQKLCAGV  | Negative |
| P01544 | CRSTLGRNCYNLCRARGAQK  | Negative |
| P01544 | NLCRARGAQKLCAGVCRCKI  | Negative |
| P01544 | RNCYNLCRARGAQKLCAGVC  | Negative |
| P01544 | NCYNLCRARGAQKLCAGVCR  | Negative |
| P01544 | ILGLVLEQLQVEGKSCCRST  | Negative |
| P01544 | CYNLCRARGAQKLCAGVCRC  | Negative |
| P01544 | LVLEQLQVEGKSCCRSTLGR  | Negative |
| P01544 | CLLILGLVLEQLQVEGKSCC  | Negative |
| P01544 | GKSCCRSTLGRNCYNLCRAR  | Negative |
| P01544 | VLEQLQVEGKSCCRSTLGRN  | Negative |
| P01544 | SCCRSTLGRNCYNLCRARGA  | Negative |
| P01544 | LQVEGKSCCRSTLGRNCYNL  | Negative |
| P01544 | LEQLQVEGKSCCRSTLGRNC  | Negative |
| P01544 | GLVLEQLQVEGKSCCRSTLG  | Negative |
| P01544 | LGLVLEQLQVEGKSCCRSTL  | Negative |
| P01544 | RSTLGRNCYNLCRARGAQKL  | Negative |
| P01545 | VLEQVQVEGKSCCRSTLGRN  | Negative |
| P01545 | KSCCRSTLGRNCYNLCRVRG  | Negative |
| P01545 | VCLLILGLVLEQVQVEGKSC  | Negative |
| P01545 | CRSTLGRNCYNLCRVARGAQK | Negative |

|        |                       |          |
|--------|-----------------------|----------|
| P01545 | VEGKSCCRSTLGRNCYNLCR  | Negative |
| P01545 | GKSCCRSTLGRNCYNLCRVR  | Negative |
| P01545 | CLLILGLVLEQVQVEGKSCC  | Negative |
| P01545 | CYNLCRVRGAQKLCAGVCRC  | Negative |
| P01545 | LGLVLEQVQVEGKSCCRSTL  | Negative |
| P01545 | NCYNLCRVRGAQKLCAGVCR  | Negative |
| P01545 | GRNCYNLCRVRGAQKLCAGV  | Negative |
| P01545 | LGRNCYNLCRVRGAQKLCAG  | Negative |
| P01545 | EQVQVEGKSCCRSTLGRNCY  | Negative |
| P01545 | STLGRNCYNLCRVRGAQKLC  | Negative |
| P01545 | ILGLVLEQVQVEGKSCCRST  | Negative |
| P01545 | RNCYNLCRVRGAQKLCAGVC  | Negative |
| P01545 | TLGRNCYNLCRVRGAQKLCA  | Negative |
| P01545 | QVQVEGKSCCRSTLGRNCYN  | Negative |
| P01545 | SCCRSTLGRNCYNLCRVRGA  | Negative |
| P01545 | RSTLGRNCYNLCRVRGAQKL  | Negative |
| P01545 | CCRSTLGRNCYNLCRVRGAQ  | Negative |
| P01545 | LILGLVLEQVQVEGKSCCRS  | Negative |
| P01545 | LVLEQVQVEGKSCCRSTLGR  | Negative |
| P01545 | GLVLEQVQVEGKSCCRSTLG  | Negative |
| P01545 | LEQVQVEGKSCCRSTLGRNC  | Negative |
| P01545 | EGKSCCRSTLGRNCYNLCRV  | Negative |
| P01545 | VQVEGKSCCRSTLGRNCYNL  | Negative |
| P01545 | QVEGKSCCRSTLGRNCYNLC  | Negative |
| P01545 | MVCLLILGLVLEQVQVEGKS  | Negative |
| P01549 | LQNTSRFLARAGATVGVAAG  | Negative |
| P01549 | VGVAAGLAFSLPADRDGAPG  | Negative |
| P01549 | FSLPADRDGAPGVTVTPATG  | Negative |
| P01549 | ATVGVAAGLAFSLPADRDGA  | Negative |
| P01549 | RFLARAGATVGVAAGLAFSL  | Negative |
| P01549 | GVAAGLAFSLPADRDGAPGV  | Negative |
| P01549 | MLQNTSRFLARAGATVGVAAG | Negative |
| P01549 | ARAGATVGVAAGLAFSLPAD  | Negative |
| P01549 | DRDGAPGVTVTPATGLSNGQ  | Negative |
| P01549 | SLPADRDGAPGVTVTPATGL  | Negative |
| P01549 | LPADRDGAPGVTVTPATGLS  | Negative |
| P01549 | FLARAGATVGVAAGLAFSLP  | Negative |
| P01549 | SRFLARAGATVGVAAGLAFS  | Negative |
| P01549 | QNTSRFLARAGATVGVAAGL  | Negative |
| P01549 | AFSLPADRDGAPGVTVTPAT  | Negative |
| P01549 | GATVGVAAGLAFSLPADRDG  | Negative |
| P01549 | ADRDGAPGVTVTPATGLSNG  | Negative |
| P01549 | LAFSLPADRDGAPGVTVTPA  | Negative |
| P01549 | RDGAPGVTVTPATGLSNGQT  | Negative |
| P01549 | AAGLAFSLPADRDGAPGVTV  | Negative |
| P01549 | TVGVAAGLAFSLPADRDGAP  | Negative |

|        |                      |          |
|--------|----------------------|----------|
| P01549 | NTSRFLARAGATVGVAAGLA | Negative |
| P01549 | TSRFLARAGATVGVAAGLAF | Negative |
| P01549 | AGLAFSLPADRDGAPGVTVT | Negative |
| P01549 | LARAGATVGVAAGLAFSLPA | Negative |
| P01549 | AGATVGVAAGLAFSLPADRD | Negative |
| P01549 | GLAFSLPADRDGAPGVTVTP | Negative |
| P01549 | RAGATVGVAAGLAFSLPADR | Negative |
| P01549 | PADRDGAPGVTVTPATGLSN | Negative |
| P01551 | RASRFGVVAVASIGLAAAAQ | Negative |
| P01551 | RHMSRRASRFGVVAVASIGL | Negative |
| P01551 | VVAVASIGLAAAAQSVAFAA | Negative |
| P01551 | GLAAAAQSVAFAPAFSVSP  | Negative |
| P01551 | SIGLAAAAQSVAFAPAFSV  | Negative |
| P01551 | FGVVAVASIGLAAAAQSVAF | Negative |
| P01551 | RFGVVAVASIGLAAAAQSV  | Negative |
| P01551 | HMSRRASRFGVVAVASIGLA | Negative |
| P01551 | VAVASIGLAAAAQSVAFAP  | Negative |
| P01551 | ASRFGVVAVASIGLAAAAQS | Negative |
| P01551 | SRRASRFGVVAVASIGLAAA | Negative |
| P01551 | IGLAAAAQSVAFAPAFSVS  | Negative |
| P01551 | SVAFAPAFSVSPASGLSDG  | Negative |
| P01551 | AAAAQSVAFAPAFSVSPAS  | Negative |
| P01551 | QSVAFAPAFSVSPASGLSD  | Negative |
| P01551 | VASIGLAAAAQSVAFAPAF  | Negative |
| P01551 | RRASRFGVVAVASIGLAAAA | Negative |
| P01551 | SLRHMSRRASRFGVVAVASI | Negative |
| P01551 | AAQSVAFAPAFSVSPASGL  | Negative |
| P01551 | LAAAAQSVAFAPAFSVSPA  | Negative |
| P01551 | AVASIGLAAAAQSVAFAP   | Negative |
| P01551 | VAFAPAFSVSPASGLSDGQ  | Negative |
| P01551 | SRFGVVAVASIGLAAAAQSV | Negative |
| P01551 | MSRRASRFGVVAVASIGLAA | Negative |
| P01551 | AQSVAFAPAFSVSPASGLS  | Negative |
| P01551 | MSLRHMSRRASRFGVVAVAS | Negative |
| P01551 | LRHMSRRASRFGVVAVASIG | Negative |
| P01551 | AAAQSVAFAPAFSVSPASG  | Negative |
| P01551 | GVVAVASIGLAAAAQSVAF  | Negative |
| P01552 | AESQPDPKPDELHKSSKFTG | Negative |
| P01552 | VLAESQPDPKPDELHKSSKF | Negative |
| P01552 | VISTPNVLAESQPDPKPDEL | Negative |
| P01552 | KRLFISHVILIFALILVIST | Negative |
| P01552 | SHVILIFALILVISTPNVLA | Negative |
| P01552 | ISHVILIFALILVISTPNVL | Negative |
| P01552 | LAESQPDPKPDELHKSSKFT | Negative |
| P01552 | ILVISTPNVLAESQPDPKPD | Negative |
| P01552 | FALILVISTPNVLAESQPDP | Negative |



|        |                       |          |
|--------|-----------------------|----------|
| P01552 | ALILVISTPNVLAESQDPDK  | Negative |
| P01552 | YKRLFISHVILIFALILVIS  | Negative |
| P01552 | LILVISTPNVLAESQDPDKP  | Negative |
| P01552 | VILIFALILVISTPNVLAES  | Negative |
| P01552 | TPNVLAESQDPDKPDELHKS  | Negative |
| P01552 | ISTPNVLAESQDPDKPDELH  | Negative |
| P01552 | LVISTPNVLAESQDPDKPDE  | Negative |
| P01552 | HVILIFALILVISTPNVLAE  | Negative |
| P01552 | NVLAESQDPDKPDELHKSSK  | Negative |
| P01552 | PNVLAESQDPDKPDELHKSS  | Negative |
| P01552 | LIFALILVISTPNVLAESQP  | Negative |
| P01552 | MYKRLFISHVILIFALILVI  | Negative |
| P01552 | SQDPDKPDELHKSSKFTGLM  | Negative |
| P01552 | LFISHVILIFALILVISTPN  | Negative |
| P01552 | STPNVLAESQDPDKPDELHK  | Negative |
| P01552 | FISHVILIFALILVISTPNV  | Negative |
| P01552 | RLFISHVILIFALILVISTP  | Negative |
| P01552 | QDPDKPDELHKSSKFTGLME  | Negative |
| P01552 | ESQDPDKPDELHKSSKFTGL  | Negative |
| P01552 | ILIFALILVISTPNVLAESQ  | Negative |
| P01553 | FALILVLFTPNVLAESQDPD  | Negative |
| P01553 | KSRFISCVILIFALILVLFT  | Negative |
| P01553 | RFISCVILIFALILVLFTPN  | Negative |
| P01553 | VILIFALILVLFTPNVLAES  | Negative |
| P01553 | ILVLFTPNVLAESQPDPTPD  | Negative |
| P01553 | MNKS RFISCVILIFALILVL | Negative |
| P01553 | LILVLFTPNVLAESQPDPTP  | Negative |
| P01553 | PNVLAESQPDPTPDELHKAS  | Negative |
| P01553 | ESQPDPTPDELHKASKFTGL  | Negative |
| P01553 | CVILIFALILVLFTPNVLAE  | Negative |
| P01553 | NVLAESQPDPTPDELHKASK  | Negative |
| P01553 | FTPNVLAESQPDPTPDELHK  | Negative |
| P01553 | SQPDPTPDELHKASKFTGLM  | Negative |
| P01553 | LFTPNVLAESQPDPTPDELH  | Negative |
| P01553 | FISCVILIFALILVLFTPNV  | Negative |
| P01553 | NKS RFISCVILIFALILVLF | Negative |
| P01553 | SCVILIFALILVLFTPNVLA  | Negative |
| P01553 | VLAESQPDPTPDELHKASKF  | Negative |
| P01553 | AESQPDPTPDELHKASKFTG  | Negative |
| P01553 | LIFALILVLFTPNVLAESQP  | Negative |
| P01553 | ISCVILIFALILVLFTPNVL  | Negative |
| P01553 | LVLFTPNVLAESQPDPTPDE  | Negative |
| P01553 | QPDPTPDELHKASKFTGLME  | Negative |
| P01553 | SRFISCVILIFALILVLFTP  | Negative |
| P01553 | ILIFALILVLFTPNVLAESQ  | Negative |
| P01553 | VLFTPNVLAESQPDPTPDEL  | Negative |

|        |                       |          |
|--------|-----------------------|----------|
| P01553 | ALILVLFTPNNVLAESQPDPT | Negative |
| P01553 | TPNNVLAESQPDPTDELHKA  | Negative |
| P01553 | LAESQPDPTDELHKASKFT   | Negative |
| P01555 | NDDKLYRADSRPPDEIKQSG  | Negative |
| P01555 | YANDDKLYRADSRPPDEIKQ  | Negative |
| P01555 | VFFIFLSSFSYANDDKLYRA  | Negative |
| P01555 | IFVFFIFLSSFSYANDDKLY  | Negative |
| P01555 | SRPPDEIKQSGGLMPRGQSE  | Negative |
| P01555 | FFIFLSSFSYANDDKLYRAD  | Negative |
| P01555 | KIIFVFFIFLSSFSYANDDK  | Negative |
| P01555 | SFSYANDDKLYRADSRPPDE  | Negative |
| P01555 | FLSSFSYANDDKLYRADSRP  | Negative |
| P01555 | MVKIIFVFFIFLSSFSYAND  | Negative |
| P01555 | IFLSSFSYANDDKLYRADSR  | Negative |
| P01555 | ADSRPPDEIKQSGGLMPRGQ  | Negative |
| P01555 | VKIIFVFFIFLSSFSYANDD  | Negative |
| P01555 | DSRPPDEIKQSGGLMPRGQS  | Negative |
| P01555 | LYRADSRPPDEIKQSGGLMP  | Negative |
| P01555 | LSSFSYANDDKLYRADSRPP  | Negative |
| P01555 | SYANDDKLYRADSRPPDEIK  | Negative |
| P01555 | DDKLYRADSRPPDEIKQSGG  | Negative |
| P01555 | FSYANDDKLYRADSRPPDEI  | Negative |
| P01555 | FIFLSSFSYANDDKLYRADS  | Negative |
| P01555 | FVFFIFLSSFSYANDDKLYR  | Negative |
| P01555 | RADSRPPDEIKQSGGLMPRG  | Negative |
| P01555 | KLYRADSRPPDEIKQSGGLM  | Negative |
| P01555 | PPDEIKQSGGLMPRGQSEYF  | Negative |
| P01555 | RPPDEIKQSGGLMPRGQSEY  | Negative |
| P01555 | SSFSYANDDKLYRADSRPPD  | Negative |
| P01555 | YRADSRPPDEIKQSGGLMPR  | Negative |
| P01555 | ANDDKLYRADSRPPDEIKQS  | Negative |
| P01555 | DKLYRADSRPPDEIKQSGGL  | Negative |
| P01556 | QNITDLCAEYHNTQIYTLND  | Negative |
| P01556 | LKFGVFFTVLLSSAYAHGTP  | Negative |
| P01556 | LCAEYHNTQIYTLNDKIFS   | Negative |
| P01556 | HGTPQNITDLCAEYHNTQIY  | Negative |
| P01556 | LSSAYAHGTPQNITDLCAEY  | Negative |
| P01556 | TPQNITDLCAEYHNTQIYTL  | Negative |
| P01556 | NITDLCAEYHNTQIYTLNDK  | Negative |
| P01556 | AYAHGTPQNITDLCAEYHNT  | Negative |
| P01556 | KFGVFFTVLLSSAYAHGTPQ  | Negative |
| P01556 | GTPQNITDLCAEYHNTQIYT  | Negative |
| P01556 | KLKFGVFFTVLLSSAYAHGT  | Negative |
| P01556 | FTVLLSSAYAHGTPQNITDL  | Negative |
| P01556 | ITDLCAEYHNTQIYTLNDKI  | Negative |
| P01556 | SSAYAHGTPQNITDLCAEYH  | Negative |

|        |                      |          |
|--------|----------------------|----------|
| P01556 | AHGTPQNITDLCAEYHNTQI | Negative |
| P01556 | DLCAEYHNTQIYTLNDKIFS | Negative |
| P01556 | LLSSAYAHGTPQNITDLCAE | Negative |
| P01556 | IKLKFGVFFTVLLSSAYAHG | Negative |
| P01556 | MIKLKFGVFFTVLLSSAYAH | Negative |
| P01556 | SAYAHGTPQNITDLCAEYHN | Negative |
| P01556 | VLLSSAYAHGTPQNITDLCA | Negative |
| P01556 | TDLCAEYHNTQIYTLNDKIF | Negative |
| P01556 | YAHGTPQNITDLCAEYHNTQ | Negative |
| P01556 | PQNITDLCAEYHNTQIYTLN | Negative |
| P01556 | VFFTVLLSSAYAHGTPQNIT | Negative |
| P01556 | FFTVLLSSAYAHGTPQNITD | Negative |
| P01556 | CAEYHNTQIYTLNDKIFSYT | Negative |
| P01556 | FGVFFTVLLSSAYAHGTPQN | Negative |
| P01556 | TVLLSSAYAHGTPQNITDLC | Negative |
| P01562 | ASPFALLMVLVVLSCSSCS  | Negative |
| P01562 | CKSSCSLGCDLPETHSLDNR | Negative |
| P01562 | FALLMVLVVLSCSSCSLGC  | Negative |
| P01562 | LSCSSCSLGCDLPETHSLD  | Negative |
| P01562 | VLSCSSCSLGCDLPETHSL  | Negative |
| P01562 | THSLDNRRTLMLLAQMSRIS | Negative |
| P01562 | ETHSLDNRRTLMLLAQMSRI | Negative |
| P01562 | LLMVLVVLSCSSCSLGCDL  | Negative |
| P01562 | LMVLVVLSCSSCSLGCDLP  | Negative |
| P01562 | MASPFALLMVLVVLSCSSC  | Negative |
| P01562 | PFALLMVLVVLSCSSCSLG  | Negative |
| P01562 | SPFALLMVLVVLSCSSCSL  | Negative |
| P01562 | ALLMVLVVLSCSSCSLGCD  | Negative |
| P01562 | DLPETHSLDNRRTLMLLAQM | Negative |
| P01562 | GCDLPETHSLDNRRTLMLLA | Negative |
| P01562 | VLVVLSCSSCSLGCDLPET  | Negative |
| P01562 | SSCSLGCDLPETHSLDNRRT | Negative |
| P01562 | SLGCDLPETHSLDNRRTLML | Negative |
| P01562 | KSSCSLGCDLPETHSLDNR  | Negative |
| P01562 | VVLSCSSCSLGCDLPETHS  | Negative |
| P01562 | CSLGCDLPETHSLDNRRTLM | Negative |
| P01562 | LPETHSLDNRRTLMLLAQMS | Negative |
| P01562 | HSLDNRRTLMLLAQMSRISP | Negative |
| P01562 | LGCDLPETHSLDNRRTLMLL | Negative |
| P01562 | CDLPETHSLDNRRTLMLLAQ | Negative |
| P01562 | PETHSLDNRRTLMLLAQMSR | Negative |
| P01562 | SCSLGCDLPETHSLDNRRTL | Negative |
| P01562 | LVVLSCSSCSLGCDLPETH  | Negative |
| P01562 | SCKSSCSLGCDLPETHSLDN | Negative |
| P01563 | VGCDLPQTHSLGSRRTLMLL | Negative |
| P01563 | SSCSVGCDLPQTHSLGSRRT | Negative |

|        |                      |          |
|--------|----------------------|----------|
| P01563 | LPQTHSLGSRRTLMLLAQMR | Negative |
| P01563 | DLPQTHSLGSRRTLMLLAQM | Negative |
| P01563 | LTFALLVALLVLSCKSSCSV | Negative |
| P01563 | CKSSCSVGCDLPQTHSLGSR | Negative |
| P01563 | LSCKSSCSVGCDLPQTHSLG | Negative |
| P01563 | FALLVALLVLSCKSSCSVGC | Negative |
| P01563 | TFALLVALLVLSCKSSCSVG | Negative |
| P01563 | PQTHSLGSRRTLMLLAQMRK | Negative |
| P01563 | CDLPQTHSLGSRRTLMLLAQ | Negative |
| P01563 | HSLGSRRTLMLLAQMRKISL | Negative |
| P01563 | KSSCSVGCDLPQTHSLGSRR | Negative |
| P01563 | SVGCDLPQTHSLGSRRTLML | Negative |
| P01563 | GCDLPQTHSLGSRRTLMLLA | Negative |
| P01563 | LLVALLVLSCKSSCSVGCDL | Negative |
| P01563 | LVALLVLSCKSSCSVGCDLP | Negative |
| P01563 | SCKSSCSVGCDLPQTHSLGS | Negative |
| P01563 | THSLGSRRTLMLLAQMRKIS | Negative |
| P01563 | ALTFALLVALLVLSCKSSCS | Negative |
| P01563 | MALTFALLVALLVLSCKSSC | Negative |
| P01563 | SCSVGCDLPQTHSLGSRRTL | Negative |
| P01563 | ALLVALLVLSCKSSCSVGCD | Negative |
| P01563 | LVLSCKSSCSVGCDLPQTHS | Negative |
| P01563 | ALLVLSCKSSCSVGCDLPQT | Negative |
| P01563 | VLSCKSSCSVGCDLPQTHSL | Negative |
| P01563 | CSVGCDLPQTHSLGSRRTLM | Negative |
| P01563 | QTHSLGSRRTLMLLAQMRKI | Negative |
| P01563 | LLVLSCKSSCSVGCDLPQTH | Negative |
| P01567 | HSLRNRRALILLAQMGRISP | Negative |
| P01567 | SFSLLMVVLVLSYKSICSLG | Negative |
| P01567 | LSYKSICSLGCDLPQTHSLR | Negative |
| P01567 | PQTHSLRNRRALILLAQMGR | Negative |
| P01567 | VVLVLSYKSICSLGCDLPQT | Negative |
| P01567 | MARSFSLLMVVLVLSYKSIC | Negative |
| P01567 | SYKSICSLGCDLPQTHSLRN | Negative |
| P01567 | LGCDLPQTHSLRNRRALILL | Negative |
| P01567 | LVLSYKSICSLGCDLPQTHS | Negative |
| P01567 | DLPQTHSLRNRRALILLAQM | Negative |
| P01567 | ICSLGCDLPQTHSLRNRRAL | Negative |
| P01567 | LLMVVLVLSYKSICSLGCDL | Negative |
| P01567 | VLVLSYKSICSLGCDLPQTH | Negative |
| P01567 | SICSLGCDLPQTHSLRNRA  | Negative |
| P01567 | THSLRNRRALILLAQMGRIS | Negative |
| P01567 | QTHSLRNRRALILLAQMGR  | Negative |
| P01567 | SLLMVVLVLSYKSICSLGCD | Negative |
| P01567 | CSLGCDLPQTHSLRNRRALI | Negative |
| P01567 | GCDLPQTHSLRNRRALILLA | Negative |

|        |                       |          |
|--------|-----------------------|----------|
| P01567 | KSICSLGCDLPQTHSLRNRR  | Negative |
| P01567 | YKSICSLGCDLPQTHSLRNRR | Negative |
| P01567 | VLSYKSICSLGCDLPQTHSL  | Negative |
| P01567 | ARSFSLLMVVLVLSYKSICS  | Negative |
| P01567 | FSLLMVVLVLSYKSICSLGC  | Negative |
| P01567 | CDLPQTHSLRNRRALILLAQ  | Negative |
| P01567 | RSFSLLMVVLVLSYKSICSL  | Negative |
| P01567 | SLGCDLPQTHSLRNRRALIL  | Negative |
| P01567 | LMVVLVLSYKSICSLGCDLP  | Negative |
| P01567 | LPQTHSLRNRRALILLAQMG  | Negative |
| P01568 | ICSLGCDLPQTHSLGNRRAL  | Negative |
| P01568 | PQTHSLGNRRALILLAQMGR  | Negative |
| P01568 | THSLGNRRALILLAQMGRIS  | Negative |
| P01568 | LSFSLLMAVLVLSYKSICSL  | Negative |
| P01568 | LVLSYKSICSLGCDLPQTHS  | Negative |
| P01568 | ALSFSLLMAVLVLSYKSICS  | Negative |
| P01568 | LLMAVLVLSYKSICSLGCDL  | Negative |
| P01568 | KSICSLGCDLPQTHSLGNRR  | Negative |
| P01568 | LGCDLPQTHSLGNRRALILL  | Negative |
| P01568 | CDLPQTHSLGNRRALILLAQ  | Negative |
| P01568 | CSLGCDLPQTHSLGNRRALI  | Negative |
| P01568 | LSYKSICSLGCDLPQTHSLG  | Negative |
| P01568 | AVLVLSYKSICSLGCDLPQT  | Negative |
| P01568 | FSLLMAVLVLSYKSICSLGC  | Negative |
| P01568 | QTHSLGNRRALILLAQMGR   | Negative |
| P01568 | VLVLSYKSICSLGCDLPQTH  | Negative |
| P01568 | HSLGNRRALILLAQMGRISP  | Negative |
| P01568 | GCDLPQTHSLGNRRALILLA  | Negative |
| P01568 | SFSLLMAVLVLSYKSICSLG  | Negative |
| P01568 | YKSICSLGCDLPQTHSLGNR  | Negative |
| P01568 | VLSYKSICSLGCDLPQTHSL  | Negative |
| P01568 | MALSFSLLMAVLVLSYKSIC  | Negative |
| P01568 | LPQTHSLGNRRALILLAQMG  | Negative |
| P01568 | DLPQTHSLGNRRALILLAQM  | Negative |
| P01568 | SLLMAVLVLSYKSICSLGCD  | Negative |
| P01568 | SYKSICSLGCDLPQTHSLGN  | Negative |
| P01568 | SLGCDLPQTHSLGNRRALIL  | Negative |
| P01568 | LMAVLVLSYKSICSLGCDLP  | Negative |
| P01568 | SICSLGCDLPQTHSLGNRRA  | Negative |
| P01569 | KSICSLGCDLPQTHSLSNRR  | Negative |
| P01569 | ALPFVLLMALVVLNCKSICS  | Negative |
| P01569 | DLPQTHSLSNRRITLMIMAQM | Negative |
| P01569 | HSLSNRRITLMIMAQMGRISP | Negative |
| P01569 | GCDLPQTHSLSNRRITLMIMA | Negative |
| P01569 | SLGCDLPQTHSLSNRRITLMI | Negative |
| P01569 | CKSICSLGCDLPQTHSLSNR  | Negative |

|        |                       |          |
|--------|-----------------------|----------|
| P01569 | LMALVVLNCKSICSLGCDLP  | Negative |
| P01569 | ALVVLNCKSICSLGCDLPQT  | Negative |
| P01569 | ICSLGCDLPQTHSLSNRRTL  | Negative |
| P01569 | LPQTHSLSNRRTLMIMAQMG  | Negative |
| P01569 | LNCKSICSLGCDLPQTHSLS  | Negative |
| P01569 | VLLMALVVLNCKSICSLGCD  | Negative |
| P01569 | PQTHSLSNRRTLMIMAQMGR  | Negative |
| P01569 | FVLLMALVVLNCKSICSLGC  | Negative |
| P01569 | SICSLGCDLPQTHSLSNRRT  | Negative |
| P01569 | LPFVLLMALVVLNCKSICSL  | Negative |
| P01569 | CDLPQTHSLSNRRTLMIMAQ  | Negative |
| P01569 | VVLNCKSICSLGCDLPQTHS  | Negative |
| P01569 | MALPFVLLMALVVLNCKSIC  | Negative |
| P01569 | QTHSLSNRRTLMIMAQMGR   | Negative |
| P01569 | MALVVLNCKSICSLGCDLPQ  | Negative |
| P01569 | PFVLLMALVVLNCKSICSLG  | Negative |
| P01569 | VLNCKSICSLGCDLPQTHSL  | Negative |
| P01569 | CSLGCDLPQTHSLSNRRTLM  | Negative |
| P01569 | NCKSICSLGCDLPQTHSLSN  | Negative |
| P01569 | LVVLNCKSICSLGCDLPQTH  | Negative |
| P01569 | LGCDLPQTHSLSNRRTLMIM  | Negative |
| P01569 | THSLSNRRTLMIMAQMGRIS  | Negative |
| P01570 | SQTHSLNNRRTLMMLMAQMRR | Negative |
| P01570 | SLGCNLSQTHSLNNRRTLM   | Negative |
| P01570 | ALPFALMMALVVLSCSSCS   | Negative |
| P01570 | ALVVLSCSSCSLGCNLSQT   | Negative |
| P01570 | SCKSSCSLGCNLSQTHSLNN  | Negative |
| P01570 | CNLSQTHSLNNRRTLMMLAQ  | Negative |
| P01570 | THSLNNRRTLMMLMAQMRRIS | Negative |
| P01570 | VVLSCSSCSLGCNLSQTHS   | Negative |
| P01570 | NLSQTHSLNNRRTLMMLAQ   | Negative |
| P01570 | LMMALVVLSCSSCSLGCNL   | Negative |
| P01570 | VLSCSSCSLGCNLSQTHSL   | Negative |
| P01570 | LGCNLSQTHSLNNRRTLMML  | Negative |
| P01570 | GCNLSQTHSLNNRRTLMMLA  | Negative |
| P01570 | KSSCSLGCNLSQTHSLNNRR  | Negative |
| P01570 | PFALMMALVVLSCSSCSLG   | Negative |
| P01570 | LPFALMMALVVLSCSSCSL   | Negative |
| P01570 | MALPFALMMALVVLSCSSC   | Negative |
| P01570 | SSCSLGCNLSQTHSLNNRRT  | Negative |
| P01570 | LSQTHSLNNRRTLMMLAQMR  | Negative |
| P01570 | HSLNNRRTLMMLMAQMRRISP | Negative |
| P01570 | LVVLSCSSCSLGCNLSQTH   | Negative |
| P01570 | CSLGCNLSQTHSLNNRRTLM  | Negative |
| P01570 | MMALVVLSCSSCSLGCNLS   | Negative |
| P01570 | ALMMALVVLSCSSCSLGCN   | Negative |

|        |                       |          |
|--------|-----------------------|----------|
| P01570 | SCSLGCNLSQTHSLNNRRTL  | Negative |
| P01570 | CKSSCSLGCNLSQTHSLNNR  | Negative |
| P01570 | LSCKSSCSLGCNLSQTHSLN  | Negative |
| P01570 | FALMMALVVLSCSSCSLGC   | Negative |
| P01570 | QTHSLNNRRTLMMLAQMRRI  | Negative |
| P01572 | FLMVLAVLSYWPTCSLGCDL  | Negative |
| P01572 | PQTHNLRNKRALTLVQMRR   | Negative |
| P01572 | LPQTHNLRNKRALTLVQMR   | Negative |
| P01572 | LAVLSYWPTCSLGCDLPQTH  | Negative |
| P01572 | LMVLAVLSYWPTCSLGCDLP  | Negative |
| P01572 | WPTCSLGCDLPQTHNLRNKR  | Negative |
| P01572 | VLSYWPTCSLGCDLPQTHNL  | Negative |
| P01572 | MARLCAFLMVLAVLSYWPTC  | Negative |
| P01572 | THNLRNKRALTLVQMRRLS   | Negative |
| P01572 | QTHNLRNKRALTLVQMRRL   | Negative |
| P01572 | LSYWPTCSLGCDLPQTHNLR  | Negative |
| P01572 | PTCSLGCDLPQTHNLRNKRA  | Negative |
| P01572 | SYWPTCSLGCDLPQTHNLRN  | Negative |
| P01572 | LCAFLMVLAVLSYWPTCSLG  | Negative |
| P01572 | AFLMVLAVLSYWPTCSLGCD  | Negative |
| P01572 | GCDLPQTHNLRNKRALTLV   | Negative |
| P01572 | LGCDLPQTHNLRNKRALTLL  | Negative |
| P01572 | SLGCDLPQTHNLRNKRALTL  | Negative |
| P01572 | ARLCAFLMVLAVLSYWPTCS  | Negative |
| P01572 | CAFLMVLAVLSYWPTCSLGC  | Negative |
| P01572 | CSLGCDLPQTHNLRNKRALT  | Negative |
| P01572 | TCSLGCDLPQTHNLRNKRAL  | Negative |
| P01572 | RLCAFLMVLAVLSYWPTCSL  | Negative |
| P01572 | VLAVLSYWPTCSLGCDLPQT  | Negative |
| P01572 | CDLPQTHNLRNKRALTLVQ   | Negative |
| P01572 | DLPQTHNLRNKRALTLVQM   | Negative |
| P01572 | YWPTCSLGCDLPQTHNLRNK  | Negative |
| P01572 | AVLSYWPTCSLGCDLPQTHN  | Negative |
| P01572 | HNLRNKRALTLVQMRRLSP   | Negative |
| P01579 | SYILAFQLCIVLGSGLGCYCQ | Negative |
| P01579 | DPYVKEAENLKKYFNAGHSD  | Negative |
| P01579 | QLCIVLGSGLGCYCQDPYVKE | Negative |
| P01579 | PYVKEAENLKKYFNAGHSDV  | Negative |
| P01579 | FQLCIVLGSGLGCYCQDPYVK | Negative |
| P01579 | CYCQDPYVKEAENLKKYFNA  | Negative |
| P01579 | YVKEAENLKKYFNAGHSDVA  | Negative |
| P01579 | KYTSYILAFQLCIVLGSGLGC | Negative |
| P01579 | EAENLKKYFNAGHSDVADNG  | Negative |
| P01579 | GSLGCYCQDPYVKEAENLKK  | Negative |
| P01579 | LCIVLGSGLGCYCQDPYVKEA | Negative |
| P01579 | CIVLGSGLGCYCQDPYVKEAE | Negative |

|        |                       |          |
|--------|-----------------------|----------|
| P01579 | YTSYILAFQLCIVLGS LGCY | Negative |
| P01579 | YILAFQLCIVLGS LGCYCQD | Negative |
| P01579 | LAFQLCIVLGS LGCYCQDPY | Negative |
| P01579 | IVLGS LGCYCQDPYVKEAEN | Negative |
| P01579 | VLGS LGCYCQDPYVKEAENL | Negative |
| P01579 | MKYTSYILAFQLCIVLGS LG | Negative |
| P01579 | ILAFQLCIVLGS LGCYCQDP | Negative |
| P01579 | CQDPYVKEAENLKKYFNAGH  | Negative |
| P01579 | KEAENLKKYFNAGHSDVADN  | Negative |
| P01579 | QDPYVKEAENLKKYFNAGHS  | Negative |
| P01579 | TSYILAFQLCIVLGS LGCYC | Negative |
| P01579 | YCQDPYVKEAENLKKYFNAG  | Negative |
| P01579 | LGCYCQDPYVKEAENLKKYF  | Negative |
| P01579 | SLGCYCQDPYVKEAENLKKY  | Negative |
| P01579 | GCYCQDPYVKEAENLKKYFN  | Negative |
| P01579 | VKEAENLKKYFNAGHSDVAD  | Negative |
| P01579 | LGS LGCYCQDPYVKEAENLK | Negative |
| P01588 | LGLPVLGAPPR LICDSRVLE | Negative |
| P01588 | WLWLLSLLSLPLGLPVLGA   | Negative |
| P01588 | GAPPR LICDSRVLERYLLEA | Negative |
| P01588 | PLGLPVLGAPPR LICDSRVL | Negative |
| P01588 | HECPAWLWLLSLLSLPLGL   | Negative |
| P01588 | LGAPPR LICDSRVLERYLLE | Negative |
| P01588 | LLSLLSLPLGLPVLGAPPR   | Negative |
| P01588 | AWLWLLSLLSLPLGLPVLG   | Negative |
| P01588 | SLPLGLPVLGAPPR LICDSR | Negative |
| P01588 | SLLSLPLGLPVLGAPPR LIC | Negative |
| P01588 | MGVHECPAWLWLLSLLSLP   | Negative |
| P01588 | LSLLSLPLGLPVLGAPPR LI | Negative |
| P01588 | LLSLPLGLPVLGAPPR LICD | Negative |
| P01588 | LPVLGAPPR LICDSRVLERY | Negative |
| P01588 | PR LICDSRVLERYLLEAKEA | Negative |
| P01588 | PPR LICDSRVLERYLLEAKE | Negative |
| P01588 | LSLPLGLPVLGAPPR LICDS | Negative |
| P01588 | VHECPAWLWLLSLLSLPLG   | Negative |
| P01588 | PAWLWLLSLLSLPLGLPVL   | Negative |
| P01588 | GVHECPAWLWLLSLLSLPL   | Negative |
| P01588 | ECPAWLWLLSLLSLPLGLP   | Negative |
| P01588 | LPLGLPVLGAPPR LICDSRV | Negative |
| P01588 | LWLLSLLSLPLGLPVLGAP   | Negative |
| P01588 | PVLGAPPR LICDSRVLERYL | Negative |
| P01588 | WLLSLLSLPLGLPVLGAPP   | Negative |
| P01588 | GLPVLGAPPR LICDSRVLER | Negative |
| P01588 | APPR LICDSRVLERYLLEAK | Negative |
| P01588 | VLGAPPR LICDSRVLERYLL | Negative |
| P01588 | CPAWLWLLSLLSLPLGLPV   | Negative |



|        |                      |          |
|--------|----------------------|----------|
| P01591 | HLLFWGVLAVFIKAVHVKAQ | Negative |
| P01591 | FWGVLAVFIKAVHVKAQEDE | Negative |
| P01591 | DERIVLVDNKCKCARITSRI | Negative |
| P01591 | LVDNKCKCARITSRIIRSSE | Negative |
| P01591 | LLFWGVLAVFIKAVHVKAQE | Negative |
| P01591 | FIKAVHVKAQEDERIVLVDN | Negative |
| P01591 | MKNHLLFWGVLAVFIKAVHV | Negative |
| P01591 | EDERIVLVDNKCKCARITSR | Negative |
| P01591 | AVHVKAQEDERIVLVDNKCK | Negative |
| P01591 | AVFIKAVHVKAQEDERIVLV | Negative |
| P01591 | AQEDERIVLVDNKCKCARIT | Negative |
| P01591 | QEDERIVLVDNKCKCARITS | Negative |
| P01591 | VLVDNKCKCARITSRIIRSS | Negative |
| P01591 | HVKAQEDERIVLVDNKCKCA | Negative |
| P01591 | NHLLFWGVLAVFIKAVHVKA | Negative |
| P01591 | RIVLVDNKCKCARITSRIIR | Negative |
| P01591 | ERIVLVDNKCKCARITSRII | Negative |
| P01591 | KNHLLFWGVLAVFIKAVHVK | Negative |
| P01591 | VLAVFIKAVHVKAQEDERIV | Negative |
| P01591 | VFIKAVHVKAQEDERIVLVD | Negative |
| P01591 | LFWGVLAVFIKAVHVKAQED | Negative |
| P01591 | IVLVDNKCKCARITSRIIRS | Negative |
| P01591 | IKAVHVKAQEDERIVLVDNK | Negative |
| P01591 | LAVFIKAVHVKAQEDERIVL | Negative |
| P01591 | KAQEDERIVLVDNKCKCARI | Negative |
| P01591 | KAVHVKAQEDERIVLVDNKC | Negative |
| P01591 | GVLAVFIKAVHVKAQEDERI | Negative |
| P01591 | VHVKAQEDERIVLVDNKCKC | Negative |
| P01591 | VKAQEDERIVLVDNKCKCAR | Negative |
| P01633 | GIKMESQIQVFVFVFLWLSG | Negative |
| P01633 | SMGIKMESQIQVFVFVFLWL | Negative |
| P01633 | FLWLSGVDGDIVMTQFAGVD | Negative |
| P01633 | SQIQVFVFVFLWLSGVDGDI | Negative |
| P01633 | IQVFVFVFLWLSGVDGDIVM | Negative |
| P01633 | FVFLWLSGVDGDIVMTQFAG | Negative |
| P01633 | ESQIQVFVFVFLWLSGVDGD | Negative |
| P01633 | LWLSGVDGDIVMTQFAGVDG | Negative |
| P01633 | VFVFVFLWLSGVDGDIVMTQ | Negative |
| P01633 | GVDGDIVMTQFAGVDGDIVM | Negative |
| P01633 | VFVFLWLSGVDGDIVMTQFA | Negative |
| P01633 | IKMESQIQVFVFVFLWLSGV | Negative |
| P01633 | SGVDGDIVMTQFAGVDGDIV | Negative |
| P01633 | DGDIVMTQFAGVDGDIVMTQ | Negative |
| P01633 | HTSMGIKMESQIQVFVFVFL | Negative |
| P01633 | KMESQIQVFVFVFLWLSGVD | Negative |
| P01633 | HHTSMGIKMESQIQVFVFVF | Negative |

|        |                      |          |
|--------|----------------------|----------|
| P01633 | TSMGIKMESQIQVFVFLW   | Negative |
| P01633 | MESQIQVFVFLWLSGVDG   | Negative |
| P01633 | MGIKMESQIQVFVFLWLS   | Negative |
| P01633 | VFLWLSGVDGDIVMTQFAGV | Negative |
| P01633 | QIQVFVFLWLSGVDGDIV   | Negative |
| P01633 | LSGVDGDIVMTQFAGVDGDI | Negative |
| P01633 | VDGDIVMTQFAGVDGDIVMT | Negative |
| P01633 | GDIVMTQFAGVDGDIVMTQS | Negative |
| P01633 | FVFLWLSGVDGDIVMTQF   | Negative |
| P01633 | MHHTSMGIKMESQIQVFV   | Negative |
| P01633 | DIVMTQFAGVDGDIVMTQSH | Negative |
| P01633 | WLSGVDGDIVMTQFAGVDGD | Negative |
| P01634 | NIVMTQSPKSMMSVGERVT  | Negative |
| P01634 | GADGNIVMTQSPKSMMSVG  | Negative |
| P01634 | HTLVFISILLCLYGADGNIV | Negative |
| P01634 | MESHTLVFISILLCLYGADG | Negative |
| P01634 | CLYGADGNIVMTQSPKSMMS | Negative |
| P01634 | TSMGIKMESHTLVFISILLC | Negative |
| P01634 | ILLCLYGADGNIVMTQSPKS | Negative |
| P01634 | SHTLVFISILLCLYGADGNI | Negative |
| P01634 | SMGIKMESHTLVFISILLCL | Negative |
| P01634 | DGNIVMTQSPKSMMSVGER  | Negative |
| P01634 | HQTSMGIKMESHTLVFISIL | Negative |
| P01634 | TLVFISILLCLYGADGNIVM | Negative |
| P01634 | SILLCLYGADGNIVMTQSPK | Negative |
| P01634 | KMESHTLVFISILLCLYGAD | Negative |
| P01634 | QTSMGIKMESHTLVFISILL | Negative |
| P01634 | FISILLCLYGADGNIVMTQS | Negative |
| P01634 | LYGADGNIVMTQSPKSMMS  | Negative |
| P01634 | ISILLCLYGADGNIVMTQSP | Negative |
| P01634 | YGADGNIVMTQSPKSMMSV  | Negative |
| P01634 | LCLYGADGNIVMTQSPKSM  | Negative |
| P01634 | GNIVMTQSPKSMMSVGERV  | Negative |
| P01634 | ESHTLVFISILLCLYGADGN | Negative |
| P01634 | IKMESHTLVFISILLCLYGA | Negative |
| P01634 | ADGNIVMTQSPKSMMSVGE  | Negative |
| P01634 | VFISILLCLYGADGNIVMTQ | Negative |
| P01634 | GIKMESHTLVFISILLCLYG | Negative |
| P01634 | LLCLYGADGNIVMTQSPKSM | Negative |
| P01634 | MGIKMESHTLVFISILLCLY | Negative |
| P01634 | MHQTSMGIKMESHTLVFISI | Negative |
| P01639 | QGTRCDIQMTQSPSSLSASL | Negative |
| P01639 | GFLLLFQGTRCDIQMTQSP  | Negative |
| P01639 | LLLFQGTRCDIQMTQSPSSL | Negative |
| P01639 | MDMRAPAQIFGFLLLFQGT  | Negative |
| P01639 | FLLLFQGTRCDIQMTQSPS  | Negative |

|        |                      |          |
|--------|----------------------|----------|
| P01639 | PAQIFGFLLLLFQGTRCDIQ | Negative |
| P01639 | RCDIQMTQSPSSLSASLGER | Negative |
| P01639 | DIQMTQSPSSLSASLGERVS | Negative |
| P01639 | IQMTQSPSSLSASLGERVSL | Negative |
| P01639 | TRCDIQMTQSPSSLSASLGE | Negative |
| P01639 | CDIQMTQSPSSLSASLGERV | Negative |
| P01639 | GTRCDIQMTQSPSSLSASLG | Negative |
| P01639 | PSSLSASLGERVSLTCRASQ | Negative |
| P01639 | APAQIFGFLLLLFQGTRCDI | Negative |
| P01639 | LLLLFQGTRCDIQMTQSPSS | Negative |
| P01639 | AQIFGFLLLLFQGTRCDIQM | Negative |
| P01639 | LLFQGTRCDIQMTQSPSSLS | Negative |
| P01639 | IFGFLLLLFQGTRCDIQMTQ | Negative |
| P01639 | SPSSLSASLGERVSLTCRAS | Negative |
| P01639 | QSPSSLSASLGERVSLTCRA | Negative |
| P01639 | FQGTRCDIQMTQSPSSLSAS | Negative |
| P01639 | MTQSPSSLSASLGERVSLTC | Negative |
| P01639 | DMRAPAQIFGFLLLLFQGTR | Negative |
| P01639 | MRAPAQIFGFLLLLFQGTRC | Negative |
| P01639 | LFQGTRCDIQMTQSPSSLSA | Negative |
| P01639 | TQSPSSLSASLGERVSLTCR | Negative |
| P01639 | RAPAQIFGFLLLLFQGTRCD | Negative |
| P01639 | QMTQSPSSLSASLGERVSLT | Negative |
| P01639 | FGFLLLLFQGTRCDIQMTQS | Negative |
| P01661 | QSPASLAVSLGQRATISCRA | Negative |
| P01661 | LWVLLWVPGSTGNIVLTQS  | Negative |
| P01661 | METDTLLWVLLWVPGSTG   | Negative |
| P01661 | PASLAVSLGQRATISCRASE | Negative |
| P01661 | LLWVPGSTGNIVLTQSPASL | Negative |
| P01661 | VPGSTGNIVLTQSPASLAVS | Negative |
| P01661 | IVLTQSPASLAVSLGQRATI | Negative |
| P01661 | VLTQSPASLAVSLGQRATIS | Negative |
| P01661 | TQSPASLAVSLGQRATISCR | Negative |
| P01661 | STGNIVLTQSPASLAVSLGQ | Negative |
| P01661 | TDTLLWVLLWVPGSTGNI   | Negative |
| P01661 | TGNIVLTQSPASLAVSLGQR | Negative |
| P01661 | SLAVSLGQRATISCRASESV | Negative |
| P01661 | NIVLTQSPASLAVSLGQRAT | Negative |
| P01661 | TLLWVLLWVPGSTGNIVL   | Negative |
| P01661 | ETDTLLWVLLWVPGSTGN   | Negative |
| P01661 | ASLAVSLGQRATISCRASES | Negative |
| P01661 | GSTGNIVLTQSPASLAVSLG | Negative |
| P01661 | GNIVLTQSPASLAVSLGQRA | Negative |
| P01661 | LLWVPGSTGNIVLTQSPAS  | Negative |
| P01661 | SPASLAVSLGQRATISCRA  | Negative |
| P01661 | WVLLWVPGSTGNIVLTQSP  | Negative |

|        |                      |          |
|--------|----------------------|----------|
| P01661 | LWVPGSTGNIVLTQSPASLA | Negative |
| P01661 | VLLLWVPGSTGNIVLTQSPA | Negative |
| P01661 | WVPGSTGNIVLTQSPASLAV | Negative |
| P01661 | PGSTGNIVLTQSPASLAVSL | Negative |
| P01661 | DTLLLWVLLLWVPGSTGNIV | Negative |
| P01661 | LTQSPASLAVSLGQRATISC | Negative |
| P01661 | LLWVLLLWVPGSTGNIVLTQ | Negative |
| P01724 | SALTTSPGETVTLTCRSSTG | Negative |
| P01724 | TTSPGETVTLTCRSSTGAVT | Negative |
| P01724 | LALSSGAISQAVVTQESALT | Negative |
| P01724 | ESALTTSPGETVTLTCRSST | Negative |
| P01724 | AISQAVVTQESALTTSPGET | Negative |
| P01724 | GAISQAVVTQESALTTSPGE | Negative |
| P01724 | SSGAISQAVVTQESALTTSP | Negative |
| P01724 | ALSSGAISQAVVTQESALTT | Negative |
| P01724 | TQESALTTSPGETVTLTCRS | Negative |
| P01724 | AVVTQESALTTSPGETVTLT | Negative |
| P01724 | VVTQESALTTSPGETVTLTC | Negative |
| P01724 | WISLILSLLALSSGAISQAV | Negative |
| P01724 | ALTTSPGETVTLTCRSSTGA | Negative |
| P01724 | QESALTTSPGETVTLTCRSS | Negative |
| P01724 | ISLILSLLALSSGAISQAVV | Negative |
| P01724 | SQAVVTQESALTTSPGETVT | Negative |
| P01724 | QAVVTQESALTTSPGETVTL | Negative |
| P01724 | LSSGAISQAVVTQESALTT  | Negative |
| P01724 | LSLLALSSGAISQAVVTQES | Negative |
| P01724 | ILSLLALSSGAISQAVVTQE | Negative |
| P01724 | LTTSPGETVTLTCRSSTGAV | Negative |
| P01724 | LLALSSGAISQAVVTQESAL | Negative |
| P01724 | LILSLLALSSGAISQAVVTQ | Negative |
| P01724 | SLLALSSGAISQAVVTQESA | Negative |
| P01724 | SGAISQAVVTQESALTTSPG | Negative |
| P01724 | VTQESALTTSPGETVTLTCR | Negative |
| P01724 | AWISLILSLLALSSGAISQA | Negative |
| P01724 | ISQAVVTQESALTTSPGETV | Negative |
| P01724 | MAWISLILSLLALSSGAISQ | Negative |
| P01729 | GASSQAVVTQESALTTSPGG | Negative |
| P01729 | LCSGASSQAVVTQESALTT  | Negative |
| P01729 | SGASSQAVVTQESALTTSPG | Negative |
| P01729 | QAVVTQESALTTSPGGTVIL | Negative |
| P01729 | CSGASSQAVVTQESALTTSP | Negative |
| P01729 | LALCSGASSQAVVTQESALT | Negative |
| P01729 | TQESALTTSPGGTVILTCRS | Negative |
| P01729 | MAWTSILSLLALCSGASSQ  | Negative |
| P01729 | SALTTSPGGTVILTCRSSTG | Negative |
| P01729 | TTSPGGTVILTCRSSTGAVT | Negative |

|        |                      |          |
|--------|----------------------|----------|
| P01729 | ALTSPGGTVILTCRSSTGA  | Negative |
| P01729 | LTTSPGGTVILTCRSSTGAV | Negative |
| P01729 | SSQAVVTQESALTTSPGGTV | Negative |
| P01729 | TSLILSLLALCSGASSQAVV | Negative |
| P01729 | LILSLLALCSGASSQAVVTQ | Negative |
| P01729 | AVVTQESALTTSPGGTVILT | Negative |
| P01729 | LSLLALCSGASSQAVVTQES | Negative |
| P01729 | ESALTTSPGGTVILTCRSST | Negative |
| P01729 | AWTSLILSLLALCSGASSQA | Negative |
| P01729 | SLLALCSGASSQAVVTQESA | Negative |
| P01729 | SQAVVTQESALTTSPGGTVI | Negative |
| P01729 | LLALCSGASSQAVVTQESAL | Negative |
| P01729 | QESALTTSPGGTVILTCRSS | Negative |
| P01729 | VTQESALTTSPGGTVILTCR | Negative |
| P01729 | ALCSGASSQAVVTQESALTT | Negative |
| P01729 | ASSQAVVTQESALTTSPGGT | Negative |
| P01729 | WTSLILSLLALCSGASSQAV | Negative |
| P01729 | VVTQESALTTSPGGTVILTC | Negative |
| P01729 | ILSLLALCSGASSQAVVTQE | Negative |
| P01783 | VQLVESGGGLVQPGGSRKLS | Negative |
| P01783 | ESGGGLVQPGGSRKLSCAAS | Negative |
| P01783 | DVQLVESGGGLVQPGGSRKL | Negative |
| P01783 | KGVQCDVQLVESGGGLVQPG | Negative |
| P01783 | RLNLVFLVLILKGVQCDVQL | Negative |
| P01783 | GLVQPGGSRKLSCAASGFTF | Negative |
| P01783 | GGGLVQPGGSRKLSCAASGF | Negative |
| P01783 | GVQCDVQLVESGGGLVQPGG | Negative |
| P01783 | GGLVQPGGSRKLSCAASGFT | Negative |
| P01783 | QCDVQLVESGGGLVQPGGSR | Negative |
| P01783 | FLVLILKGVQCDVQLVESGG | Negative |
| P01783 | VLILKGVQCDVQLVESGGGL | Negative |
| P01783 | VQPGGSRKLSCAASGFTFSS | Negative |
| P01783 | LVILKGVQCDVQLVESGGG  | Negative |
| P01783 | VQCDVQLVESGGGLVQPGGS | Negative |
| P01783 | LILKGVQCDVQLVESGGGLV | Negative |
| P01783 | VFLVLILKGVQCDVQLVESG | Negative |
| P01783 | LVFLVLILKGVQCDVQLVES | Negative |
| P01783 | QPGGSRKLSCAASGFTFSSF | Negative |
| P01783 | PGGSRKLSCAASGFTFSSFG | Negative |
| P01783 | CDVQLVESGGGLVQPGGSRK | Negative |
| P01783 | LKGVQCDVQLVESGGGLVQP | Negative |
| P01783 | VESGGGLVQPGGSRKLSCAA | Negative |
| P01783 | ILKGVQCDVQLVESGGGLVQ | Negative |
| P01783 | LVESGGGLVQPGGSRKLSCA | Negative |
| P01783 | NLVFLVLILKGVQCDVQLVE | Negative |
| P01783 | LVQPGGSRKLSCAASGFTFS | Negative |

|        |                      |          |
|--------|----------------------|----------|
| P01783 | QLVESGGGLVQPGGSRKLSC | Negative |
| P01783 | SGGGLVQPGGSRKLSCAASG | Negative |
| P01795 | LLHGIQCEVKVVESGGGLVQ | Negative |
| P01795 | WLNWVFLLTLLHGIQCEVKV | Negative |
| P01795 | FLLTLLHGIQCEVKVVESGG | Negative |
| P01795 | GGLVQPGGSLRLSCATSGFT | Negative |
| P01795 | QCEVKVVESGGGLVQPGGSL | Negative |
| P01795 | GGGLVQPGGSLRLSCATSGF | Negative |
| P01795 | LHGIQCEVKVVESGGGLVQP | Negative |
| P01795 | NWVFLLTLLHGIQCEVKVVE | Negative |
| P01795 | CEVKVVESGGGLVQPGGSLR | Negative |
| P01795 | MWLNWVFLLTLLHGIQCEVK | Negative |
| P01795 | VESGGGLVQPGGSLRLSCAT | Negative |
| P01795 | HGIQCEVKVVESGGGLVQPG | Negative |
| P01795 | LTLLHGIQCEVKVVESGGGL | Negative |
| P01795 | GLVQPGGSLRLSCATSGFTF | Negative |
| P01795 | KMWLNWVFLLTLLHGIQCEV | Negative |
| P01795 | KVVESGGGLVQPGGSLRLSC | Negative |
| P01795 | GIQCEVKVVESGGGLVQPGG | Negative |
| P01795 | WVFLLTLLHGIQCEVKVVES | Negative |
| P01795 | LVQPGGSLRLSCATSGFTFS | Negative |
| P01795 | VFLLTLLHGIQCEVKVVESG | Negative |
| P01795 | SGGGLVQPGGSLRLSCATSG | Negative |
| P01795 | VVESGGGLVQPGGSLRLSCA | Negative |
| P01795 | EVKVVESGGGLVQPGGSLRL | Negative |
| P01795 | VKVVESGGGLVQPGGSLRLS | Negative |
| P01795 | MKMWLNWVFLLTLLHGIQCE | Negative |
| P01795 | LLTLLHGIQCEVKVVESGGG | Negative |
| P01795 | ESGGGLVQPGGSLRLSCATS | Negative |
| P01795 | IQCEVKVVESGGGLVQPGGG | Negative |
| P01795 | TLLHGIQCEVKVVESGGGLV | Negative |
| P01822 | MSDVQLQESGPGLVKPSQSL | Negative |
| P01822 | LVKPSQSLSLTCSVTGYSIT | Negative |
| P01822 | GIMSDVQLQESGPGLVKPSQ | Negative |
| P01822 | GPGLVKPSQSLSLTCSVTGY | Negative |
| P01822 | PGIMSDVQLQESGPGLVKPS | Negative |
| P01822 | VQLQESGPGLVKPSQSLSLT | Negative |
| P01822 | SDVQLQESGPGLVKPSQSLS | Negative |
| P01822 | IPGIMSDVQLQESGPGLVKP | Negative |
| P01822 | SGPGLVKPSQSLSLTCSVTG | Negative |
| P01822 | LLYLLTAIPGIMSDVQLQES | Negative |
| P01822 | YLLTAIPGIMSDVQLQESGP | Negative |
| P01822 | IMSDVQLQESGPGLVKPSQS | Negative |
| P01822 | AIPGIMSDVQLQESGPGLVK | Negative |
| P01822 | DVQLQESGPGLVKPSQSLSL | Negative |
| P01822 | SLLYLLTAIPGIMSDVQLQE | Negative |

|        |                      |          |
|--------|----------------------|----------|
| P01822 | PGLVKPSQSLSLTCSVTGYS | Negative |
| P01822 | VKPSQSLSLTCSVTGYSITS | Negative |
| P01822 | MKVLSLLYLLTAIPGIMSDV | Negative |
| P01822 | ESGPGLVKPSQSLSLTCSVT | Negative |
| P01822 | LQESGPGLVKPSQSLSLTCS | Negative |
| P01822 | QESGPGLVKPSQSLSLTCSV | Negative |
| P01822 | LTAIPGIMSDVQLQESGPGL | Negative |
| P01822 | GLVKPSQSLSLTCSVTGYSI | Negative |
| P01822 | QLQESGPGLVKPSQSLSLTC | Negative |
| P01822 | LLTAIPGIMSDVQLQESGPG | Negative |
| P01822 | VLSLLYLLTAIPGIMSDVQL | Negative |
| P01822 | KVLSLLYLLTAIPGIMSDVQ | Negative |
| P01822 | TAIPGIMSDVQLQESGPGLV | Negative |
| P01822 | LYLLTAIPGIMSDVQLQESG | Negative |
| P01830 | VISLTACLVNQNLRLDCRHE | Negative |
| P01830 | LVNQNLRLDCRHENNTNLPI | Negative |
| P01830 | QMSRGQRVISLTACLVNQNL | Negative |
| P01830 | LQMSRGQRVISLTACLVNQN | Negative |
| P01830 | CLVNQNLRLDCRHENNTNLP | Negative |
| P01830 | MSRGQRVISLTACLVNQNLR | Negative |
| P01830 | LLSVLQMSRGQRVISLTAC  | Negative |
| P01830 | SLTACLVNQNLRLDCRHENN | Negative |
| P01830 | ACLVNQNLRLDCRHENNTNL | Negative |
| P01830 | SITLLSVLQMSRGQRVISL  | Negative |
| P01830 | GQRVISLTACLVNQNLRLDC | Negative |
| P01830 | LTACLVNQNLRLDCRHENNT | Negative |
| P01830 | VNQNLRLDCRHENNTNLPIQ | Negative |
| P01830 | NPVISITLLSVLQMSRGQR  | Negative |
| P01830 | RGQRVISLTACLVNQNLRLD | Negative |
| P01830 | MNPVISITLLSVLQMSRGQ  | Negative |
| P01830 | TLLSVLQMSRGQRVISLTA  | Negative |
| P01830 | LLSVLQMSRGQRVISLTACL | Negative |
| P01830 | SVLQMSRGQRVISLTACLVN | Negative |
| P01830 | LSVLQMSRGQRVISLTACLV | Negative |
| P01830 | ITLLSVLQMSRGQRVISLT  | Negative |
| P01830 | PVISITLLSVLQMSRGQRV  | Negative |
| P01830 | SRGQRVISLTACLVNQNLRL | Negative |
| P01830 | RVISLTACLVNQNLRLDCRH | Negative |
| P01830 | VISITLLSVLQMSRGQRVI  | Negative |
| P01830 | TACLVNQNLRLDCRHENNTN | Negative |
| P01830 | ISLTACLVNQNLRLDCRHEN | Negative |
| P01830 | VLQMSRGQRVISLTACLVNQ | Negative |
| P01830 | QRVISLTACLVNQNLRLDCR | Negative |
| P01831 | VNQNLRLDCRHENNTKDNSI | Negative |
| P01831 | TSLTACLVNQNLRLDCRHEN | Negative |
| P01831 | LQVSRGQKVTSLTACLVNQN | Negative |

|        |                      |          |
|--------|----------------------|----------|
| P01831 | SRGQKVTSLTACLVNQNLRL | Negative |
| P01831 | LSVLQVSRGQKVTSLTACLV | Negative |
| P01831 | GQKVTSLTACLVNQNLRLDC | Negative |
| P01831 | QVSRGQKVTSLTACLVNQNL | Negative |
| P01831 | ALLSVLQVSRGQKVTSLTA  | Negative |
| P01831 | SVALLSVLQVSRGQKVTSL  | Negative |
| P01831 | PAISVALLSVLQVSRGQKV  | Negative |
| P01831 | LVNQNLRLDCRHENNTKDNS | Negative |
| P01831 | SVLQVSRGQKVTSLTACLVN | Negative |
| P01831 | ACLVNQNLRLDCRHENNTKD | Negative |
| P01831 | TACLVNQNLRLDCRHENNTK | Negative |
| P01831 | QKVTSLTACLVNQNLRLDCR | Negative |
| P01831 | AISVALLSVLQVSRGQKVT  | Negative |
| P01831 | KVTSLTACLVNQNLRLDCRH | Negative |
| P01831 | RGQKVTSLTACLVNQNLRLD | Negative |
| P01831 | NPAISVALLSVLQVSRGQK  | Negative |
| P01831 | VLQVSRGQKVTSLTACLVNQ | Negative |
| P01831 | VTSLTACLVNQNLRLDCRHE | Negative |
| P01831 | LLSVLQVSRGQKVTSLTAC  | Negative |
| P01831 | MNPAISVALLSVLQVSRGQ  | Negative |
| P01831 | CLVNQNLRLDCRHENNTKDN | Negative |
| P01831 | SLTACLVNQNLRLDCRHENN | Negative |
| P01831 | VALLSVLQVSRGQKVTSLT  | Negative |
| P01831 | VSRGQKVTSLTACLVNQNLR | Negative |
| P01831 | LTACLVNQNLRLDCRHENNT | Negative |
| P01831 | LLSVLQVSRGQKVTSLTACL | Negative |
| P01887 | YSRHPPENGKPNILNCYVTQ | Negative |
| P01887 | LVSLTGLYAIQKTPQIQVYS | Negative |
| P01887 | PQIQVYSRHPPENGKPNILN | Negative |
| P01887 | LVLVSLTGLYAIQKTPQIQV | Negative |
| P01887 | SVTLVFLVLVSLTGLYAIQK | Negative |
| P01887 | VTLVFLVLVSLTGLYAIQKT | Negative |
| P01887 | YAIQKTPQIQVYSRHPPENG | Negative |
| P01887 | LYAIQKTPQIQVYSRHPPEN | Negative |
| P01887 | VYSRHPPENGKPNILNCYVT | Negative |
| P01887 | TPQIQVYSRHPPENGKPNIL | Negative |
| P01887 | MARSVTLVFLVLVSLTGLYA | Negative |
| P01887 | IQVYSRHPPENGKPNILNCY | Negative |
| P01887 | QKTPQIQVYSRHPPENGKPN | Negative |
| P01887 | IQKTPQIQVYSRHPPENGKP | Negative |
| P01887 | SLTGLYAIQKTPQIQVYSRH | Negative |
| P01887 | VSLTGLYAIQKTPQIQVYSR | Negative |
| P01887 | KTPQIQVYSRHPPENGKPNI | Negative |
| P01887 | FLVLVSLTGLYAIQKTPQIQ | Negative |
| P01887 | VLVSLTGLYAIQKTPQIQVY | Negative |
| P01887 | ARSVTLVFLVLVSLTGLYAI | Negative |



|        |                       |          |
|--------|-----------------------|----------|
| P01887 | AIQKTPQIQVYSRHP PengK | Negative |
| P01887 | GLYAIQKTPQIQVYSRH PPE | Negative |
| P01887 | QVYSRHPPENGKPNILNCYV  | Negative |
| P01887 | LVFLVLVSLTGLYAIQKTPQ  | Negative |
| P01887 | LTGLYAIQKTPQIQVYSRHP  | Negative |
| P01887 | TGLYAIQKTPQIQVYSRHPP  | Negative |
| P01887 | VFLVLVSLTGLYAIQKTPQI  | Negative |
| P01887 | RSVTLVFLVLVSLTGLYAIQ  | Negative |
| P01887 | QIQVYSRHPPENGKPNILNC  | Negative |
| P01888 | GLLSLSGLDAIQRPPKIQVY  | Negative |
| P01888 | LSGLDAIQRPPKIQVYSRHP  | Negative |
| P01888 | MARFVALVLLGLLSLSGLDA  | Negative |
| P01888 | RPPKIQVYSRHPPEDGKPNY  | Negative |
| P01888 | QRPPKIQVYSRHPPEDGKPN  | Negative |
| P01888 | IQRPPKIQVYSRHPPEDGKP  | Negative |
| P01888 | VALVLLGLLSLSGLDAIQRP  | Negative |
| P01888 | AIQRPPKIQVYSRHPPEDGK  | Negative |
| P01888 | LDAIQRPPKIQVYSRHPPED  | Negative |
| P01888 | FVALVLLGLLSLSGLDAIQR  | Negative |
| P01888 | LLSLSGLDAIQRPPKIQVYS  | Negative |
| P01888 | VYSRHPPEDGKPNYLNCYVY  | Negative |
| P01888 | DAIQRPPKIQVYSRHPPEDG  | Negative |
| P01888 | ARFVALVLLGLLSLSGLDAI  | Negative |
| P01888 | PKIQVYSRHPPEDGKPNYL   | Negative |
| P01888 | SLSGLDAIQRPPKIQVYSRH  | Negative |
| P01888 | KIQVYSRHPPEDGKPNYLNC  | Negative |
| P01888 | SGLDAIQRPPKIQVYSRHPP  | Negative |
| P01888 | GLDAIQRPPKIQVYSRH PPE | Negative |
| P01888 | LGLLSLSGLDAIQRPPKIQV  | Negative |
| P01888 | LLGLLSLSGLDAIQRPPKIQ  | Negative |
| P01888 | PKIQVYSRHPPEDGKPNYLN  | Negative |
| P01888 | QVYSRHPPEDGKPNYLNCYV  | Negative |
| P01888 | IQVYSRHPPEDGKPNYLNCY  | Negative |
| P01888 | VLLGLLSLSGLDAIQRPPKI  | Negative |
| P01888 | YSRHPPEDGKPNYLNCYVYG  | Negative |
| P01888 | RFVALVLLGLLSLSGLDAIQ  | Negative |
| P01888 | LSLSGLDAIQRPPKIQVYSR  | Negative |
| P01888 | LVLLGLLSLSGLDAIQRPPK  | Negative |
| P02223 | LCIVGAIADPVSSDQANAIR  | Negative |
| P02223 | ANAIRASWAGVKHNEVDILA  | Negative |
| P02223 | SDQANAIRASWAGVKHNEVD  | Negative |
| P02223 | IADPVSSDQANAIRASWAGV  | Negative |
| P02223 | SSDQANAIRASWAGVKHNEV  | Negative |
| P02223 | FIVLALCIVGAIADPVSSDQ  | Negative |
| P02223 | PVSSDQANAIRASWAGVKHN  | Negative |
| P02223 | IVLALCIVGAIADPVSSDQA  | Negative |

|        |                      |          |
|--------|----------------------|----------|
| P02223 | DQANAIASWAGVKHNEVDI  | Negative |
| P02223 | VSSDQANAIASWAGVKHNE  | Negative |
| P02223 | ASWAGVKHNEVDILAAVFS  | Negative |
| P02223 | ADPVSSDQANAIASWAGVK  | Negative |
| P02223 | QANAIASWAGVKHNEVDIL  | Negative |
| P02223 | CIVGAIADPVSSDQANAIRA | Negative |
| P02223 | GAIDPVSSDQANAIASWA   | Negative |
| P02223 | AIRASWAGVKHNEVDILAAV | Negative |
| P02223 | NAIRASWAGVKHNEVDILAA | Negative |
| P02223 | VLALCIVGAIADPVSSDQAN | Negative |
| P02223 | MKFFIVLALCIVGAIADPVS | Negative |
| P02223 | RASWAGVKHNEVDILAAVFS | Negative |
| P02223 | IRASWAGVKHNEVDILAAVF | Negative |
| P02223 | FFIVLALCIVGAIADPVSSD | Negative |
| P02223 | SWAGVKHNEVDILAAVFS   | Negative |
| P02223 | AIADPVSSDQANAIASWAG  | Negative |
| P02223 | LALCIVGAIADPVSSDQANA | Negative |
| P02223 | VGAIADPVSSDQANAIASW  | Negative |
| P02223 | ALCIVGAIADPVSSDQANAI | Negative |
| P02223 | IVGAIADPVSSDQANAIAS  | Negative |
| P02223 | DPVSSDQANAIASWAGVKH  | Negative |
| P02226 | VKSTWAQVRNSEVEILAAVF | Negative |
| P02226 | ADQAALVKSTWAQVRNSEVE | Negative |
| P02226 | DQAALVKSTWAQVRNSEVEI | Negative |
| P02226 | ASPLSADQAALVKSTWAQVR | Negative |
| P02226 | PLSADQAALVKSTWAQVRNS | Negative |
| P02226 | AALVKSTWAQVRNSEVEILA | Negative |
| P02226 | IASPLSADQAALVKSTWAQV | Negative |
| P02226 | ALCIVGAIASPLSADQAALV | Negative |
| P02226 | AIASPLSADQAALVKSTWAQ | Negative |
| P02226 | VLALCIVGAIASPLSADQAA | Negative |
| P02226 | LSADQAALVKSTWAQVRNSE | Negative |
| P02226 | CIVGAIASPLSADQAALVKS | Negative |
| P02226 | ALVKSTWAQVRNSEVEILAA | Negative |
| P02226 | TWAQVRNSEVEILAAVFTAY | Negative |
| P02226 | GAIASPLSADQAALVKSTWA | Negative |
| P02226 | KSTWAQVRNSEVEILAAVFT | Negative |
| P02226 | VGAIASPLSADQAALVKSTW | Negative |
| P02226 | AVLALCIVGAIASPLSADQA | Negative |
| P02226 | IVGAIASPLSADQAALVKST | Negative |
| P02226 | SPLSADQAALVKSTWAQVRN | Negative |
| P02226 | STWAQVRNSEVEILAAVFTA | Negative |
| P02226 | LCIVGAIASPLSADQAALVK | Negative |
| P02226 | SADQAALVKSTWAQVRNSEV | Negative |
| P02226 | QAALVKSTWAQVRNSEVEIL | Negative |
| P02226 | FFAVLALCIVGAIASPLSAD | Negative |

|        |                      |          |
|--------|----------------------|----------|
| P02226 | LALCIVGAIASPLSADQAAL | Negative |
| P02226 | LVKSTWAQVRNSEVEILAAV | Negative |
| P02226 | MKFFAVLALCIVGAIASPLS | Negative |
| P02226 | FAVLALCIVGAIASPLSADQ | Negative |
| P02462 | HSRAAAKGGCAGSGCGKCDC | Negative |
| P02462 | AALLLHEEHSRAAAKGGCAG | Negative |
| P02462 | RLSVWLLLLPAALLLHEEHS | Negative |
| P02462 | LHEEHSRAAAKGGCAGSGCG | Negative |
| P02462 | VWLLLLPAALLLHEEHSRAA | Negative |
| P02462 | SVWLLLLPAALLLHEEHSRA | Negative |
| P02462 | LLHEEHSRAAAKGGCAGSGC | Negative |
| P02462 | LPAALLLHEEHSRAAAKGGC | Negative |
| P02462 | KGGCAGSGCGKCDCHGVKGQ | Negative |
| P02462 | LLPAALLLHEEHSRAAAKGG | Negative |
| P02462 | EHSRAAAKGGCAGSGCGKCD | Negative |
| P02462 | AAAKGGCAGSGCGKCDCHGV | Negative |
| P02462 | AAKGGCAGSGCGKCDCHGVK | Negative |
| P02462 | WLLLLPAALLLHEEHSRAAA | Negative |
| P02462 | ALLLHEEHSRAAAKGGCAGS | Negative |
| P02462 | AKGGCAGSGCGKCDCHGVKG | Negative |
| P02462 | LLPAALLLHEEHSRAAAKG  | Negative |
| P02462 | MGPRLSVWLLLLPAALLLHE | Negative |
| P02462 | EEHSRAAAKGGCAGSGCGKC | Negative |
| P02462 | LLLPAALLLHEEHSRAAAK  | Negative |
| P02462 | GPRLSVWLLLLPAALLLHEE | Negative |
| P02462 | LSVWLLLLPAALLLHEEHSR | Negative |
| P02462 | GGCAGSGCGKCDCHGVKGQK | Negative |
| P02462 | PRLSVWLLLLPAALLLHEEH | Negative |
| P02462 | HEEHSRAAAKGGCAGSGCGK | Negative |
| P02462 | RAAAKGGCAGSGCGKCDCHG | Negative |
| P02462 | LLHEEHSRAAAKGGCAGSG  | Negative |
| P02462 | SRAAAKGGCAGSGCGKCDCH | Negative |
| P02462 | GCAGSGCGKCDCHGVKGQKG | Negative |
| P02466 | SVRKGPTGDRGPRGQRPAG  | Negative |
| P02466 | LLLAVTSLATCQSLQMGS   | Negative |
| P02466 | VDTRTLLLLAVTSLATCQS  | Negative |
| P02466 | TSLATCQSLQMGSVRKGPT  | Negative |
| P02466 | SFVDTRTLLLLAVTSLATC  | Negative |
| P02466 | LAVTSLATCQSLQMGSVRK  | Negative |
| P02466 | AVTSLATCQSLQMGSVRKG  | Negative |
| P02466 | MLSFVDTRTLLLLAVTSLA  | Negative |
| P02466 | VRKGPTGDRGPRGQRPAGP  | Negative |
| P02466 | VTSLATCQSLQMGSVRKGP  | Negative |
| P02466 | TLLLLAVTSLATCQSLQMG  | Negative |
| P02466 | SLQMGSVRKGPTGDRGPRGQ | Negative |
| P02466 | DTRTLLLLAVTSLATCQSL  | Negative |

|        |                      |          |
|--------|----------------------|----------|
| P02466 | LQMGSVRKGPTGDRGPRGQR | Negative |
| P02466 | ATCQSLQMGSVRKGPTGDRG | Negative |
| P02466 | LSFVDTRTLLLLAVTSCLAT | Negative |
| P02466 | QSLQMGSVRKGPTGDRGPRG | Negative |
| P02466 | LLAVTSCLATCQSLQMGSVR | Negative |
| P02466 | FVDTRTLLLLAVTSCLATCQ | Negative |
| P02466 | LATCQSLQMGSVRKGPTGDR | Negative |
| P02466 | MGSVRKGPTGDRGPRGQRGP | Negative |
| P02466 | QMGSVRKGPTGDRGPRGQRG | Negative |
| P02466 | TCQSLQMGSVRKGPTGDRGP | Negative |
| P02466 | CQSLQMGSVRKGPTGDRGPR | Negative |
| P02466 | LLAVTSCLATCQSLQMGSV  | Negative |
| P02466 | CLATCQSLQMGSVRKGPTGD | Negative |
| P02466 | GSVRKGPTGDRGPRGQRGPA | Negative |
| P02466 | SCLATCQSLQMGSVRKGPTG | Negative |
| P02466 | TRTLLLLAVTSCLATCQSLQ | Negative |
| P02647 | MKAAVLTLAVLFLTGSQARH | Negative |
| P02647 | AAVLTLAVLFLTGSQARHFW | Negative |
| P02647 | LAVLFLTGSQARHFWQQDEP | Negative |
| P02647 | KAAVLTLAVLFLTGSQARHF | Negative |
| P02647 | TGSQARHFWQQDEPPQSPWD | Negative |
| P02647 | AVLFLTGSQARHFWQQDEPP | Negative |
| P02647 | VLFLTGSQARHFWQQDEPPQ | Negative |
| P02647 | VLTLAVLFLTGSQARHFWQQ | Negative |
| P02647 | DEPPQSPWDRVKDLATVYVD | Negative |
| P02647 | SPWDRVKDLATVYVDVLKDS | Negative |
| P02647 | TLAVLFLTGSQARHFWQQDE | Negative |
| P02647 | ARHFWQQDEPPQSPWDRVKD | Negative |
| P02647 | HFWQQDEPPQSPWDRVKDLA | Negative |
| P02647 | QQDEPPQSPWDRVKDLATVY | Negative |
| P02647 | LTGSQARHFWQQDEPPQSPW | Negative |
| P02647 | RHFWQQDEPPQSPWDRVKDL | Negative |
| P02647 | LFLTGSQARHFWQQDEPPQS | Negative |
| P02647 | FWQQDEPPQSPWDRVKDLAT | Negative |
| P02647 | GSQARHFWQQDEPPQSPWDR | Negative |
| P02647 | QSPWDRVKDLATVYVDVLKD | Negative |
| P02647 | PQSPWDRVKDLATVYVDVLK | Negative |
| P02647 | QARHFWQQDEPPQSPWDRVK | Negative |
| P02647 | WQQDEPPQSPWDRVKDLATV | Negative |
| P02647 | SQARHFWQQDEPPQSPWDRV | Negative |
| P02647 | EPPQSPWDRVKDLATVYVDV | Negative |
| P02647 | QDEPPQSPWDRVKDLATVYV | Negative |
| P02647 | PPQSPWDRVKDLATVYVDVL | Negative |
| P02647 | FLTGSQARHFWQQDEPPQSP | Negative |
| P02647 | LTLAVLFLTGSQARHFWQQD | Negative |
| P02648 | QSPWDRVKDLATVYVDAVKD | Negative |

|        |                      |          |
|--------|----------------------|----------|
| P02648 | WQQDEPQSPWDRVKDLATVY | Negative |
| P02648 | RHFWQQDEPQSPWDRVKDLA | Negative |
| P02648 | GSQARHFWQQDEPQSPWDRV | Negative |
| P02648 | TGSQARHFWQQDEPQSPWDR | Negative |
| P02648 | MKAALLTLAVLFLTGSQARH | Negative |
| P02648 | LLTLAVLFLTGSQARHFWQQ | Negative |
| P02648 | SQARHFWQQDEPQSPWDRVK | Negative |
| P02648 | QQDEPQSPWDRVKDLATVYV | Negative |
| P02648 | VLFLTGSQARHFWQQDEPQS | Negative |
| P02648 | EPQSPWDRVKDLATVYVDAV | Negative |
| P02648 | AVLFLTGSQARHFWQQDEPQ | Negative |
| P02648 | PQSPWDRVKDLATVYVDAVK | Negative |
| P02648 | HFWQQDEPQSPWDRVKDLAT | Negative |
| P02648 | PWDRVKDLATVYVDAVKDSG | Negative |
| P02648 | SPWDRVKDLATVYVDAVKDS | Negative |
| P02648 | LFLTGSQARHFWQQDEPQSP | Negative |
| P02648 | AALLTLAVLFLTGSQARHFW | Negative |
| P02648 | KAALLTLAVLFLTGSQARHF | Negative |
| P02648 | LAVLFLTGSQARHFWQQDEP | Negative |
| P02648 | DEPQSPWDRVKDLATVYVDA | Negative |
| P02648 | ARHFWQQDEPQSPWDRVKDL | Negative |
| P02648 | FWQQDEPQSPWDRVKDLATV | Negative |
| P02648 | QDEPQSPWDRVKDLATVYVD | Negative |
| P02648 | LTGSQARHFWQQDEPQSPWD | Negative |
| P02648 | FLTGSQARHFWQQDEPQSPW | Negative |
| P02648 | TLAVLFLTGSQARHFWQQDE | Negative |
| P02648 | QARHFWQQDEPQSPWDRVKD | Negative |
| P02648 | LTLAVLFLTGSQARHFWQQD | Negative |
| P02649 | KVLWAALLVTFLAGCQAKVE | Negative |
| P02649 | VLWAALLVTFLAGCQAKVEQ | Negative |
| P02649 | QAKVEQAVETEPEPELRQQT | Negative |
| P02649 | TFLAGCQAKVEQAVETEPEP | Negative |
| P02649 | VEQAVETEPEPELRQQTEWQ | Negative |
| P02649 | ETEPEPELRQQTEWQSGQRW | Negative |
| P02649 | AVETEPEPELRQQTEWQSGQ | Negative |
| P02649 | EPEPELRQQTEWQSGQRWEL | Negative |
| P02649 | ALLVTFLAGCQAKVEQAVET | Negative |
| P02649 | MKVLWAALLVTFLAGCQAKV | Negative |
| P02649 | LLVTFLAGCQAKVEQAVETE | Negative |
| P02649 | EQAVETEPEPELRQQTEWQS | Negative |
| P02649 | LVTFLAGCQAKVEQAVETEP | Negative |
| P02649 | VETEPEPELRQQTEWQSGQR | Negative |
| P02649 | CQAKVEQAVETEPEPELRQQ | Negative |
| P02649 | AGCQAKVEQAVETEPEPELR | Negative |
| P02649 | AALLVTFLAGCQAKVEQAVE | Negative |
| P02649 | EPELRQQTEWQSGQRWELAL | Negative |

|        |                       |          |
|--------|-----------------------|----------|
| P02649 | PEPELRQQTEWQSGQRWELA  | Negative |
| P02649 | GCQAKVEQAVETEPEPELRQ  | Negative |
| P02649 | QAVETEPEPELRQQTEWQSG  | Negative |
| P02649 | FLAGCQAKVEQAVETEPEPE  | Negative |
| P02649 | TEPEPELRQQTEWQSGQRWE  | Negative |
| P02649 | VTFLAGCQAKVEQAVETEPE  | Negative |
| P02649 | LAGCQAKVEQAVETEPEPEL  | Negative |
| P02649 | WAALLVTFLAGCQAKVEQAV  | Negative |
| P02649 | AKVEQAVETEPEPELRQQTE  | Negative |
| P02649 | PELRQQTEWQSGQRWELALG  | Negative |
| P02649 | KVEQAVETEPEPELRQQTEW  | Negative |
| P02652 | QAKEPCVESLSQYFQTVTD   | Negative |
| P02652 | TICSLEGALVRRQAKEPCVE  | Negative |
| P02652 | AATVLLL TICSLEGALVRRQ | Negative |
| P02652 | VLLL TICSLEGALVRRQAKE | Negative |
| P02652 | KLLAATVLLL TICSLEGALV | Negative |
| P02652 | EPCVESLSQYFQTVTDYGK   | Negative |
| P02652 | CVESLSQYFQTVTDYGKDL   | Negative |
| P02652 | ALVRRQAKEPCVESLSQYF   | Negative |
| P02652 | RRQAKEPCVESLSQYFQTV   | Negative |
| P02652 | RQAKEPCVESLSQYFQTVT   | Negative |
| P02652 | LVRRQAKEPCVESLSQYFQ   | Negative |
| P02652 | LTICSLEGALVRRQAKEPCV  | Negative |
| P02652 | SLEGALVRRQAKEPCVESLV  | Negative |
| P02652 | ICSLEGALVRRQAKEPCVES  | Negative |
| P02652 | LLTICSLEGALVRRQAKEPC  | Negative |
| P02652 | LLLTICSLEGALVRRQAKEP  | Negative |
| P02652 | GALVRRQAKEPCVESLSQY   | Negative |
| P02652 | VESLSQYFQTVTDYGKDLM   | Negative |
| P02652 | VRRQAKEPCVESLSQYFQT   | Negative |
| P02652 | CSLEGALVRRQAKEPCVESL  | Negative |
| P02652 | AKEPCVESLSQYFQTVTDY   | Negative |
| P02652 | LLAATVLLL TICSLEGALVR | Negative |
| P02652 | MKLLAATVLLL TICSLEGAL | Negative |
| P02652 | KEPCVESLSQYFQTVTDYG   | Negative |
| P02652 | EGALVRRQAKEPCVESLSQ   | Negative |
| P02652 | PCVESLSQYFQTVTDYGKD   | Negative |
| P02652 | TVLLL TICSLEGALVRRQAK | Negative |
| P02652 | LEGALVRRQAKEPCVESLS   | Negative |
| P02652 | ATVLLL TICSLEGALVRRQA | Negative |
| P02654 | IVLEGPAPAQGTPDVSSALD  | Negative |
| P02654 | GPAPAQGTPDVSSALDKLKE  | Negative |
| P02654 | LPVLVVLSIVLEGPAPAQG   | Negative |
| P02654 | LEGPAPAQGTPDVSSALDKL  | Negative |
| P02654 | PDVSSALDKLKEFGNTLEDK  | Negative |
| P02654 | LSIVLEGPAPAQGTPDVSSA  | Negative |

|        |                      |          |
|--------|----------------------|----------|
| P02654 | TPDVSSALDKLKEFGNTLED | Negative |
| P02654 | APAQGTPDVSSALDKLKEFG | Negative |
| P02654 | QGTPDVSSALDKLKEFGNTL | Negative |
| P02654 | SIVLEGPAPAQGTPDVSSAL | Negative |
| P02654 | VVVLSIVLEGPAPAQGTPDV | Negative |
| P02654 | DVSSALDKLKEFGNTLEDKA | Negative |
| P02654 | EGPAPAQGTPDVSSALDKLK | Negative |
| P02654 | MRLFLSLPVLVVVLSIVLEG | Negative |
| P02654 | VLSIVLEGPAPAQGTPDVSS | Negative |
| P02654 | SLPVLVVVLSIVLEGPAPAQ | Negative |
| P02654 | GTPDVSSALDKLKEFGNTLE | Negative |
| P02654 | LSLPVLVVVLSIVLEGPAPA | Negative |
| P02654 | LFLSLPVLVVVLSIVLEGPA | Negative |
| P02654 | VLEGPAPAQGTPDVSSALDK | Negative |
| P02654 | PAQGTPDVSSALDKLKEFGN | Negative |
| P02654 | PAPAQGTPDVSSALDKLKEF | Negative |
| P02654 | VSSALDKLKEFGNTLEDKAR | Negative |
| P02654 | FLSLPVLVVVLSIVLEGPAP | Negative |
| P02654 | AQGTPDVSSALDKLKEFGNT | Negative |
| P02654 | PVLVVVLSIVLEGPAPAQGT | Negative |
| P02654 | RLFLSLPVLVVVLSIVLEGP | Negative |
| P02654 | LVVVLSIVLEGPAPAQGTPD | Negative |
| P02654 | VLVVVLSIVLEGPAPAQGTP | Negative |
| P02655 | DEMPSPTFLTQVKESLSSYW | Negative |
| P02655 | LFLVLLVLGFEVQGTQQPQQ | Negative |
| P02655 | FEVQGTQQPQQDEMPSPTFL | Negative |
| P02655 | LLVLGFEVQGTQQPQQDEMP | Negative |
| P02655 | EVQGTQQPQQDEMPSPTFLT | Negative |
| P02655 | QQDEMPSPTFLTQVKESLSS | Negative |
| P02655 | VLLVLGFEVQGTQQPQQDEM | Negative |
| P02655 | QGTQQPQQDEMPSPTFLTQV | Negative |
| P02655 | GFEVQGTQQPQQDEMPSPTF | Negative |
| P02655 | VLGFEVQGTQQPQQDEMPSP | Negative |
| P02655 | GTRLLPALFLVLLVLGFEVQ | Negative |
| P02655 | PALFLVLLVLGFEVQGTQQP | Negative |
| P02655 | FLVLLVLGFEVQGTQQPQQD | Negative |
| P02655 | TQQPQQDEMPSPTFLTQVKE | Negative |
| P02655 | LVLLVLGFEVQGTQQPQQDE | Negative |
| P02655 | RLLPALFLVLLVLGFEVQGT | Negative |
| P02655 | LGFEVQGTQQPQQDEMPSPT | Negative |
| P02655 | MGTRLLPALFLVLLVLGFEV | Negative |
| P02655 | TRLLPALFLVLLVLGFEVQG | Negative |
| P02655 | VQGTQQPQQDEMPSPTFLTQ | Negative |
| P02655 | LVLGFEVQGTQQPQQDEMPS | Negative |
| P02655 | LLPALFLVLLVLGFEVQGTQ | Negative |
| P02655 | QQPQQDEMPSPTFLTQVKES | Negative |

|        |                        |          |
|--------|------------------------|----------|
| P02655 | LPALFLVLLVLGFEVQGTQQ   | Negative |
| P02655 | PQQDEMPSPTFLTQVKESLS   | Negative |
| P02655 | EMPSPTFLTQVKESLSSYWE   | Negative |
| P02655 | QDEMPSPTFLTQVKESLSSY   | Negative |
| P02655 | GTQQPQQDEMPSPTFLTQVK   | Negative |
| P02655 | QPQQDEMPSPTFLTQVKESL   | Negative |
| P02656 | ASLLSFMQGYMKHATKTAKD   | Negative |
| P02656 | ASEAEDASLLSFMQGYMKHA   | Negative |
| P02656 | RASEAEDASLLSFMQGYMKH   | Negative |
| P02656 | LVVALLALLASARASEAEDA   | Negative |
| P02656 | LALLASARASEAEDASLLSF   | Negative |
| P02656 | SFMQGYMKHATKTAKDALSS   | Negative |
| P02656 | VVALLALLASARASEAEDAS   | Negative |
| P02656 | VALLALLASARASEAEDASL   | Negative |
| P02656 | ARASEAEDASLLSFMQGYMK   | Negative |
| P02656 | EDASLLSFMQGYMKHATKTA   | Negative |
| P02656 | LASARASEAEDASLLSFMQG   | Negative |
| P02656 | LSFMQGYMKHATKTAKDALS   | Negative |
| P02656 | EAEDASLLSFMQGYMKHATK   | Negative |
| P02656 | PRVLLVVALLALLASARASE   | Negative |
| P02656 | SLLSFMQGYMKHATKTAKDA   | Negative |
| P02656 | LLASARASEAEDASLLSFMQ   | Negative |
| P02656 | SEAEDASLLSFMQGYMKHAT   | Negative |
| P02656 | SARASEAEDASLLSFMQGYM   | Negative |
| P02656 | ASARASEAEDASLLSFMQGY   | Negative |
| P02656 | AEDASLLSFMQGYMKHATKT   | Negative |
| P02656 | RVLLVVALLALLASARASEA   | Negative |
| P02656 | LLALLASARASEAEDASLLS   | Negative |
| P02656 | MQPRVLLVVALLALLASARA   | Negative |
| P02656 | LLSFMQGYMKHATKTAKDAL   | Negative |
| P02656 | DASLLSFMQGYMKHATKTAK   | Negative |
| P02656 | ALLALLASARASEAEDASLL   | Negative |
| P02656 | VLLVVALLALLASARASEAE   | Negative |
| P02656 | QPRVLLVVALLALLASARAS   | Negative |
| P02656 | ALLASARASEAEDASLLSFM   | Negative |
| P02659 | LLSTTVPEVHKSII DRERR   | Negative |
| P02659 | VQYRALVIAVILLSTTVPE    | Negative |
| P02659 | VPEVHKSII DRERRD WLVI  | Negative |
| P02659 | ILLSTTVPEVHKSII DRE    | Negative |
| P02659 | TVPEVHKSII DRERRD WLVI | Negative |
| P02659 | IIDRERRD WLVIPDAAAAYI  | Negative |
| P02659 | RALVIAVILLSTTVPEVHS    | Negative |
| P02659 | IDRERRD WLVIPDAAAAYIY  | Negative |
| P02659 | EVHKSII DRERRD WLVIPD  | Negative |
| P02659 | VILLSTTVPEVHKSII DR    | Negative |
| P02659 | STTVPEVHKSII DRERRD W  | Negative |



|        |                       |          |
|--------|-----------------------|----------|
| P02659 | YRALVIAVILLLLSTTVPEVH | Negative |
| P02659 | IAVILLLLSTTVPEVHSKSII | Negative |
| P02659 | ALVIAVILLLLSTTVPEVHSK | Negative |
| P02659 | LLLSTTVPEVHSKSIIDRER  | Negative |
| P02659 | TTVPEVHSKSIIDRERRDWL  | Negative |
| P02659 | SKSIIDRERRDWLVIPDAAA  | Negative |
| P02659 | VIAVILLLLSTTVPEVHSKI  | Negative |
| P02659 | MVQYRALVIAVILLLLSTTV  | Negative |
| P02659 | DRERRDWLVIPDAAAAYIYE  | Negative |
| P02659 | SIIDRERRDWLVIPDAAAAY  | Negative |
| P02659 | RERRDWLVIPDAAAAYIYEA  | Negative |
| P02659 | LVIAVILLLLSTTVPEVHSKS | Negative |
| P02659 | VHKSIIIDRERRDWLVIPDA  | Negative |
| P02659 | HSKSIIDRERRDWLVIPDAA  | Negative |
| P02659 | KSIIDRERRDWLVIPDAAAA  | Negative |
| P02659 | LSTTVPEVHSKSIIDRERRD  | Negative |
| P02659 | QYRALVIAVILLLLSTTVPEV | Negative |
| P02659 | PEVHSKSIIDRERRDWLVIP  | Negative |
| P02668 | LPFLGAQEQNQEPIRCEKD   | Negative |
| P02668 | ALTLPFLGAQEQNQEPIRC   | Negative |
| P02668 | NQEPIRCEKDERFFSDKIA   | Negative |
| P02668 | FFLVVTILALTLPFLGAQEQ  | Negative |
| P02668 | TILALTLPFLGAQEQNQEPP  | Negative |
| P02668 | EQPIRCEKDERFFSDKIAKY  | Negative |
| P02668 | KSFFLVVTILALTLPFLGAQ  | Negative |
| P02668 | EQNQEPIRCEKDERFFSDK   | Negative |
| P02668 | LALTLPFLGAQEQNQEPIR   | Negative |
| P02668 | QNQEPIRCEKDERFFSDKI   | Negative |
| P02668 | AQEQNQEPIRCEKDERFFS   | Negative |
| P02668 | MKSFFLVVTILALTLPFLGA  | Negative |
| P02668 | QEPIRCEKDERFFSDKIAK   | Negative |
| P02668 | IRCEKDERFFSDKIAKYIPI  | Negative |
| P02668 | MMKSFFLVVTILALTLPFLG  | Negative |
| P02668 | VTILALTLPFLGAQEQNQE   | Negative |
| P02668 | TLPFLGAQEQNQEPIRCEK   | Negative |
| P02668 | QEQNQEPIRCEKDERFFSD   | Negative |
| P02668 | GAQEQNQEPIRCEKDERFF   | Negative |
| P02668 | FLVVTILALTLPFLGAQEQN  | Negative |
| P02668 | SFFLVVTILALTLPFLGAQE  | Negative |
| P02668 | LGAQEQNQEPIRCEKDERF   | Negative |
| P02668 | FLGAQEQNQEPIRCEKDER   | Negative |
| P02668 | PIRCEKDERFFSDKIAKYIP  | Negative |
| P02668 | PFLGAQEQNQEPIRCEKDE   | Negative |
| P02668 | LTLPLFLGAQEQNQEPIRCE  | Negative |
| P02668 | QPIRCEKDERFFSDKIAKYI  | Negative |
| P02668 | VVTILALTLPFLGAQEQNQE  | Negative |

|        |                      |          |
|--------|----------------------|----------|
| P02668 | ILALTLPFLGAQEQNQEQPI | Negative |
| P02671 | SVVGTAWTADSGEGDFLAEG | Negative |
| P02671 | DSGEGDFLAEGGGVRGPRVV | Negative |
| P02671 | SGEGDFLAEGGGVRGPRVVE | Negative |
| P02671 | CLVLSVVGTAWTADSGEGDF | Negative |
| P02671 | LVLSVVGTAWTADSGEGDFL | Negative |
| P02671 | FLAEGGGVRGPRVVERHQSA | Negative |
| P02671 | VVGTAWTADSGEGDFLAEGG | Negative |
| P02671 | IVCLVLSVVGTAWTADSGEG | Negative |
| P02671 | LSVVGTAWTADSGEGDFLAE | Negative |
| P02671 | FSMRIVCLVLSVVGTAWTAD | Negative |
| P02671 | GEGDFLAEGGGVRGPRVVER | Negative |
| P02671 | AEGGGVRGPRVVERHQSACK | Negative |
| P02671 | DFLAEGGGVRGPRVVERHQS | Negative |
| P02671 | TAWTADSGEGDFLAEGGGVR | Negative |
| P02671 | MFSMRIVCLVLSVVGTAWTA | Negative |
| P02671 | LAEGGGVRGPRVVERHQSAC | Negative |
| P02671 | GTAWTADSGEGDFLAEGGGV | Negative |
| P02671 | VCLVLSVVGTAWTADSGEGD | Negative |
| P02671 | AWTADSGEGDFLAEGGGVRG | Negative |
| P02671 | EGDFLAEGGGVRGPRVVERH | Negative |
| P02671 | ADSGEGDFLAEGGGVRGPRV | Negative |
| P02671 | WTADSGEGDFLAEGGGVRGP | Negative |
| P02671 | EGGGVRGPRVVERHQSACKD | Negative |
| P02671 | GDFLAEGGGVRGPRVVERHQ | Negative |
| P02671 | SMRIVCLVLSVVGTAWTADS | Negative |
| P02671 | MRIVCLVLSVVGTAWTADSG | Negative |
| P02671 | VLSVVGTAWTADSGEGDFLA | Negative |
| P02671 | TADSGEGDFLAEGGGVRGPR | Negative |
| P02671 | VGTAWTADSGEGDFLAEGGG | Negative |
| P02672 | CLVLSLVGAIKTEDGSDPPS | Negative |
| P02672 | DFLTEGGGVRGPRLVERQQS | Negative |
| P02672 | SLVGAIKTEDGSDPPSGDFL | Negative |
| P02672 | MFSVRDLCLVLSLVGAIKTE | Negative |
| P02672 | SGDFLTEGGGVRGPRLVERQ | Negative |
| P02672 | TEDGSDPPSGDFLTEGGGVR | Negative |
| P02672 | GAIKTEDGSDPPSGDFLTEG | Negative |
| P02672 | DLCLVLSLVGAIKTEDGSDP | Negative |
| P02672 | VLSLVGAIKTEDGSDPPSGD | Negative |
| P02672 | SVRDLCLVLSLVGAIKTEDG | Negative |
| P02672 | VGAIKTEDGSDPPSGDFLTE | Negative |
| P02672 | FLTEGGGVRGPRLVERQQSA | Negative |
| P02672 | LVLSLVGAIKTEDGSDPPSG | Negative |
| P02672 | FSVRDLCLVLSLVGAIKTED | Negative |
| P02672 | VRDLCLVLSLVGAIKTEDGS | Negative |
| P02672 | LSLVGAIKTEDGSDPPSGDF | Negative |

|        |                       |          |
|--------|-----------------------|----------|
| P02672 | DGSDPPSGDFLTEGGGVRGP  | Negative |
| P02672 | LVGAIKTEDGSDPPSGDFLT  | Negative |
| P02672 | GDFLTEGGGVRGPRLVERQQ  | Negative |
| P02672 | SDPPSGDFLTEGGGVRGPRL  | Negative |
| P02672 | DPPSGDFLTEGGGVRGPRLV  | Negative |
| P02672 | AIKTEDGSDPPSGDFLTEGG  | Negative |
| P02672 | PPSGDFLTEGGGVRGPRLVE  | Negative |
| P02672 | EDGSDPPSGDFLTEGGGVRG  | Negative |
| P02672 | KTEDGSDPPSGDFLTEGGGV  | Negative |
| P02672 | LCLVLSLVGAIKTEDGSDPP  | Negative |
| P02672 | GSDPPSGDFLTEGGGVRGPRL | Negative |
| P02672 | IKTEDGSDPPSGDFLTEGGG  | Negative |
| P02672 | PSGDFLTEGGGVRGPRLVER  | Negative |
| P02675 | LLLLLLCVFLVKSQGVNDNE  | Negative |
| P02675 | LLLLLCVFLVKSQGVNDNEE  | Negative |
| P02675 | VKSQGVNDNEEGFFSARGHR  | Negative |
| P02675 | FHKLKTMKHLLLLLLCVFLV  | Negative |
| P02675 | RMVSWSFHKLKTMKHLLLLL  | Negative |
| P02675 | CVFLVKSQGVNDNEEGFFSA  | Negative |
| P02675 | HLLLLLLCVFLVKSQGVNDN  | Negative |
| P02675 | FLVKSQGVNDNEEGFFSARG  | Negative |
| P02675 | MKHLLLLLLLCVFLVKSQGVN | Negative |
| P02675 | LLLCVFLVKSQGVNDNEEGF  | Negative |
| P02675 | LLCVFLVKSQGVNDNEEGFF  | Negative |
| P02675 | LKTMKHLLLLLLLCVFLVKSQ | Negative |
| P02675 | SQGVNDNEEGFFSARGHRPL  | Negative |
| P02675 | LLLLCVFLVKSQGVNDNEEG  | Negative |
| P02675 | SWSFHKLKTMKHLLLLLLCV  | Negative |
| P02675 | VSWSFHKLKTMKHLLLLLLC  | Negative |
| P02675 | LCVFLVKSQGVNDNEEGFFS  | Negative |
| P02675 | KTMKHLLLLLLLCVFLVKSQG | Negative |
| P02675 | SFHKLKTMKHLLLLLLCVFL  | Negative |
| P02675 | KLKTMKHLLLLLLCVFLVKS  | Negative |
| P02675 | MKRMVSWSFHKLKTMKHL    | Negative |
| P02675 | HKLKTMKHLLLLLLCVFLVK  | Negative |
| P02675 | LVKSQGVNDNEEGFFSARGH  | Negative |
| P02675 | MVSWSFHKLKTMKHLLLLL   | Negative |
| P02675 | KSQGVNDNEEGFFSARGHRP  | Negative |
| P02675 | KRMVSWSFHKLKTMKHL     | Negative |
| P02675 | TMKHLLLLLLCVFLVKSQGV  | Negative |
| P02675 | WSFHKLKTMKHLLLLLLCVF  | Negative |
| P02675 | VFLVKSQGVNDNEEGFFSAR  | Negative |
| P02679 | SLHPRNLILYFYALLFLSST  | Negative |
| P02679 | SSTCVAYVATRDNCCILDER  | Negative |
| P02679 | PRNLILYFYALLFLSSTCVA  | Negative |
| P02679 | YFYALLFLSSTCVAYVATRD  | Negative |

|        |                      |          |
|--------|----------------------|----------|
| P02679 | ILYFYALLFLSSTCVAYVAT | Negative |
| P02679 | FLSSTCVAYVATRDNCCILD | Negative |
| P02679 | ATRDNCCILDERFGSYCPTT | Negative |
| P02679 | LHPRNLILYFYALLFLSSTC | Negative |
| P02679 | LSSTCVAYVATRDNCCILDE | Negative |
| P02679 | LILYFYALLFLSSTCVAYVA | Negative |
| P02679 | CVAYVATRDNCCILDERFGS | Negative |
| P02679 | HPRNLILYFYALLFLSSTCV | Negative |
| P02679 | YALLFLSSTCVAYVATRDN  | Negative |
| P02679 | MSWSLHPRNLILYFYALLFL | Negative |
| P02679 | TCVAYVATRDNCCILDERFG | Negative |
| P02679 | AYVATRDNCCILDERFGSYC | Negative |
| P02679 | RNLILYFYALLFLSSTCVAY | Negative |
| P02679 | LFLSSTCVAYVATRDNCCIL | Negative |
| P02679 | YVATRDNCCILDERFGSYCP | Negative |
| P02679 | LLFLSSTCVAYVATRDNCCI | Negative |
| P02679 | STCVAYVATRDNCCILDERF | Negative |
| P02679 | TRDNCCILDERFGSYCPTTC | Negative |
| P02679 | ALLFLSSTCVAYVATRDNCC | Negative |
| P02679 | FYALLFLSSTCVAYVATRDN | Negative |
| P02679 | VAYVATRDNCCILDERFGSY | Negative |
| P02679 | NLILYFYALLFLSSTCVAYV | Negative |
| P02679 | VATRDNCCILDERFGSYCPT | Negative |
| P02679 | WSLHPRNLILYFYALLFLSS | Negative |
| P02679 | SWSLHPRNLILYFYALLFLS | Negative |
| P02681 | IALLTTVASVLAADTNAPI  | Negative |
| P02681 | KLFGIALLLTTVASVLAADT | Negative |
| P02681 | ADTNAPICLCDEPGVLGRTQ | Negative |
| P02681 | APICLCDEPGVLGRTQIVTT | Negative |
| P02681 | KKLFGIALLLTTVASVLAAD | Negative |
| P02681 | VLAADTNAPICLCDEPGVLG | Negative |
| P02681 | TVASVLAADTNAPICLCDEP | Negative |
| P02681 | TTVASVLAADTNAPICLCDE | Negative |
| P02681 | TNAPICLCDEPGVLGRTQIV | Negative |
| P02681 | VASVLAADTNAPICLCDEPG | Negative |
| P02681 | ICLCDEPGVLGRTQIVTTEI | Negative |
| P02681 | LLLTTVASVLAADTNAPICL | Negative |
| P02681 | LAADTNAPICLCDEPGVLGR | Negative |
| P02681 | EKKLFGIALLLTTVASVLAA | Negative |
| P02681 | DTNAPICLCDEPGVLGRTQI | Negative |
| P02681 | ASVLAADTNAPICLCDEPGV | Negative |
| P02681 | CDEPGVLGRTQIVTTEIKDK | Negative |
| P02681 | CLCDEPGVLGRTQIVTTEIK | Negative |
| P02681 | GIALLLTTVASVLAADTNAP | Negative |
| P02681 | LTTVASVLAADTNAPICLCD | Negative |
| P02681 | PICLCDEPGVLGRTQIVTTE | Negative |

|        |                      |          |
|--------|----------------------|----------|
| P02681 | MEKKLFGIALLLTTVASVLA | Negative |
| P02681 | LFGIALLLTTVASVLAADTN | Negative |
| P02681 | AADTNAPICLCDEPGVLGRT | Negative |
| P02681 | LLTTVASVLAADTNAPICLC | Negative |
| P02681 | SVLAADTNAPICLCDEPGVL | Negative |
| P02681 | ALLLTTVASVLAADTNAPIC | Negative |
| P02681 | LCDEPGVLGRTQIVTTEIKD | Negative |
| P02681 | NAPICLCDEPGVLGRTQIVT | Negative |
| P02701 | MVHATSPLLLLLLLSLALVA | Negative |
| P02701 | SLTGKWTNDLGSNMTIGAVN | Negative |
| P02701 | LSARKCSLTGKWTNDLGSNM | Negative |
| P02701 | HATSPLLLLLLLSLALVAPG | Negative |
| P02701 | APGLSARKCSLTGKWTNDLG | Negative |
| P02701 | SARKCSLTGKWTNDLGSNMT | Negative |
| P02701 | VAPGLSARKCSLTGKWTNDL | Negative |
| P02701 | CSLTGKWTNDLGSNMTIGAV | Negative |
| P02701 | GLSARKCSLTGKWTNDLGSN | Negative |
| P02701 | LVAPGLSARKCSLTGKWTND | Negative |
| P02701 | ALVAPGLSARKCSLTGKWTN | Negative |
| P02701 | LTGKWTNDLGSNMTIGAVNS | Negative |
| P02701 | RKCSLTGKWTNDLGSNMTIG | Negative |
| P02701 | KCSLTGKWTNDLGSNMTIGA | Negative |
| P02701 | SLALVAPGLSARKCSLTGKW | Negative |
| P02701 | VHATSPLLLLLLLSLALVAP | Negative |
| P02701 | LSLALVAPGLSARKCSLTGK | Negative |
| P02701 | PGLSARKCSLTGKWTNDLGS | Negative |
| P02701 | SPLLLLLLLSLALVAPGLSA | Negative |
| P02701 | ARKCSLTGKWTNDLGSNMTI | Negative |
| P02701 | LALVAPGLSARKCSLTGKWT | Negative |
| P02701 | LLLLSLALVAPGLSARKCSL | Negative |
| P02701 | LLLLLLSLALVAPGLSARK  | Negative |
| P02701 | ATSPLLLLLLLSLALVAPGL | Negative |
| P02701 | TSPLLLLLLLSLALVAPGLS | Negative |
| P02701 | LLSLALVAPGLSARKCSLT  | Negative |
| P02701 | LLLLLLSLALVAPGLSARKC | Negative |
| P02701 | PLLLLLLLSLALVAPGLSAR | Negative |
| P02701 | LLSLALVAPGLSARKCSLTG | Negative |
| P02702 | MAWQMTQLLLLALVAAAWGA | Negative |
| P02702 | AAAWGAQAPRTPRARTDLLN | Negative |
| P02702 | QMTQLLLLALVAAAWGAQAP | Negative |
| P02702 | QLLLLALVAAAWGAQAPRTP | Negative |
| P02702 | AWQMTQLLLLALVAAAWGAQ | Negative |
| P02702 | LLALVAAAWGAQAPRTPRAR | Negative |
| P02702 | TDLLNVCMDAKHKAEPGPE  | Negative |
| P02702 | WGAQAPRTPRARTDLLNVC  | Negative |
| P02702 | TQLLLLALVAAAWGAQAPRT | Negative |

|        |                      |          |
|--------|----------------------|----------|
| P02702 | VAAAWGAQAPRTPRARTDLL | Negative |
| P02702 | LLLALVAAAWGAQAPRTPRA | Negative |
| P02702 | AAWGAQAPRTPRARTDLLNV | Negative |
| P02702 | ALVAAAWGAQAPRTPRARTD | Negative |
| P02702 | RARTDLLNVCMDAKHHKAEP | Negative |
| P02702 | ARTDLLNVCMDAKHHKAEPG | Negative |
| P02702 | PRTPRARTDLLNVCMDAKHH | Negative |
| P02702 | RTPRARTDLLNVCMDAKHHK | Negative |
| P02702 | QAPRTPRARTDLLNVCMDAK | Negative |
| P02702 | APRTPRARTDLLNVCMDAKH | Negative |
| P02702 | PRARTDLLNVCMDAKHHKAE | Negative |
| P02702 | LVAAAWGAQAPRTPRARTDL | Negative |
| P02702 | RTDLLNVCMDAKHHKAEPGP | Negative |
| P02702 | WQMTQLLLLALVAAAWGAQA | Negative |
| P02702 | AQAPRTPRARTDLLNVCMDA | Negative |
| P02702 | LALVAAAWGAQAPRTPRART | Negative |
| P02702 | TPRARTDLLNVCMDAKHHKA | Negative |
| P02702 | AWGAQAPRTPRARTDLLNVC | Negative |
| P02702 | LLLLALVAAAWGAQAPRTPR | Negative |
| P02702 | GAQAPRTPRARTDLLNVCMD | Negative |
| P02703 | LLVTLTVAYAVPDPRGIIN  | Negative |
| P02703 | EGELCLNSAQCKSNCCQHDT | Negative |
| P02703 | VAYAVPDPRGIINLDEGEL  | Negative |
| P02703 | TVAYAVPDPRGIINLDEGE  | Negative |
| P02703 | VLALLVTLTVAYAVPDPRG  | Negative |
| P02703 | TLTVAYAVPDPRGIINLDE  | Negative |
| P02703 | EKVLALLVTLTVAYAVPDP  | Negative |
| P02703 | MEKVLALLVTLTVAYAVPD  | Negative |
| P02703 | IINLDEGELCLNSAQCKSNC | Negative |
| P02703 | IIINLDEGELCLNSAQCKSN | Negative |
| P02703 | RGIINLDEGELCLNSAQCK  | Negative |
| P02703 | LVTLTVAYAVPDPRGIINL  | Negative |
| P02703 | LLVTLTVAYAVPDPRGIII  | Negative |
| P02703 | INLDEGELCLNSAQCKSNCC | Negative |
| P02703 | LDEGELCLNSAQCKSNCCQH | Negative |
| P02703 | ALLVTLTVAYAVPDPRGII  | Negative |
| P02703 | DEGELCLNSAQCKSNCCQHD | Negative |
| P02703 | AVPDPRGIINLDEGELCLN  | Negative |
| P02703 | PDPRGIINLDEGELCLNSA  | Negative |
| P02703 | DPRGIINLDEGELCLNSAQ  | Negative |
| P02703 | NLDEGELCLNSAQCKSNCCQ | Negative |
| P02703 | VPDPRGIINLDEGELCLNS  | Negative |
| P02703 | LTVAYAVPDPRGIINLDEG  | Negative |
| P02703 | YAVPDPRGIINLDEGELCL  | Negative |
| P02703 | AYAVPDPRGIINLDEGELC  | Negative |
| P02703 | VTLTVAYAVPDPRGIINLD  | Negative |

|        |                      |          |
|--------|----------------------|----------|
| P02703 | GIINLDEGELCLNSAQCKS  | Negative |
| P02703 | PRGIINLDEGELCLNSAQC  | Negative |
| P02703 | LALLVTLTVAYAVDPGRGI  | Negative |
| P02739 | VQGAWDMYRAYSDMREANYK | Negative |
| P02739 | IGEAVQGAWDMYRAYSDMRE | Negative |
| P02739 | LIFCSLVLGVSQWYSFIGE  | Negative |
| P02739 | SFIGEAVQGAWDMYRAYSDM | Negative |
| P02739 | GAWDMYRAYSDMREANYKNS | Negative |
| P02739 | VLGVSSQWYSFIGEAVQGAW | Negative |
| P02739 | SLVLGVSSQWYSFIGEAVQG | Negative |
| P02739 | FCSLVLGVSQWYSFIGEAV  | Negative |
| P02739 | MKLFTGLIFCSLVLGVSQW  | Negative |
| P02739 | SSQWYSFIGEAVQGAWDMYR | Negative |
| P02739 | LFTGLIFCSLVLGVSQWYS  | Negative |
| P02739 | LVLGVSSQWYSFIGEAVQGA | Negative |
| P02739 | FIGEAVQGAWDMYRAYSDMR | Negative |
| P02739 | KLFTGLIFCSLVLGVSQWY  | Negative |
| P02739 | SQWYSFIGEAVQGAWDMYRA | Negative |
| P02739 | VSSQWYSFIGEAVQGAWDMY | Negative |
| P02739 | AVQGAWDMYRAYSDMREANY | Negative |
| P02739 | WYSFIGEAVQGAWDMYRAYS | Negative |
| P02739 | QGAWDMYRAYSDMREANYKN | Negative |
| P02739 | EAVQGAWDMYRAYSDMREAN | Negative |
| P02739 | GVSSQWYSFIGEAVQGAWDM | Negative |
| P02739 | TGLIFCSLVLGVSQWYSFI  | Negative |
| P02739 | CSLVLGVSQWYSFIGEAVQ  | Negative |
| P02739 | LGVSQWYSFIGEAVQGAWD  | Negative |
| P02739 | YSFIGEAVQGAWDMYRAYSD | Negative |
| P02739 | GLIFCSLVLGVSQWYSFIG  | Negative |
| P02739 | QWYSFIGEAVQGAWDMYRAY | Negative |
| P02739 | GEAVQGAWDMYRAYSDMREA | Negative |
| P02739 | IFCSLVLGVSQWYSFIGEA  | Negative |
| P02740 | NPFTRGGRFVLDAAGGAWDM | Negative |
| P02740 | IVCASADNPFTRGGRFVLDA | Negative |
| P02740 | ADNPFTRGGRFVLDAAGGAW | Negative |
| P02740 | GGRFVLDAAGGAWDMLRAYR | Negative |
| P02740 | VLLAVIVCASADNPFTRGGR | Negative |
| P02740 | VIVCASADNPFTRGGRFVLD | Negative |
| P02740 | ICFVLLAVIVCASADNPFTR | Negative |
| P02740 | AVIVCASADNPFTRGGRFVL | Negative |
| P02740 | LDAAGGAWDMLRAYRDMREA | Negative |
| P02740 | RGGRFVLDAAGGAWDMLRAY | Negative |
| P02740 | MRLCICFVLLAVIVCASADN | Negative |
| P02740 | LAVIVCASADNPFTRGGRFV | Negative |
| P02740 | PFTRGGRFVLDAAGGAWDML | Negative |
| P02740 | LLAVIVCASADNPFTRGGRF | Negative |

|        |                       |          |
|--------|-----------------------|----------|
| P02740 | FVLLAVIVCASADNPFTRGG  | Negative |
| P02740 | LCICFVLLAVIVCASADNPF  | Negative |
| P02740 | FTRGGRFVLDAAGGAWDMLR  | Negative |
| P02740 | TRGGRFVLDAAGGAWDMLRA  | Negative |
| P02740 | DNPFTRGGRFVLDAAGGAWD  | Negative |
| P02740 | RFVLDAAGGAWDMLRAYRDM  | Negative |
| P02740 | ASADNPFTRGGRFVLDAAGG  | Negative |
| P02740 | VCASADNPFTRGGRFVLDAAG | Negative |
| P02740 | VLDAAGGAWDMLRAYRDMRE  | Negative |
| P02740 | RLCICFVLLAVIVCASADNP  | Negative |
| P02740 | GRFVLDAAGGAWDMLRAYRD  | Negative |
| P02740 | SADNPFTRGGRFVLDAAGGA  | Negative |
| P02740 | CASADNPFTRGGRFVLDAAG  | Negative |
| P02740 | FVLDAAGGAWDMLRAYRDMR  | Negative |
| P02740 | CFVLLAVIVCASADNPFTRG  | Negative |
| P02741 | FPKESDTSYVSLKAPLTKPL  | Negative |
| P02741 | SHAFGQTDMSRKAFVFPKES  | Negative |
| P02741 | AFVFPKESDTSYVSLKAPLT  | Negative |
| P02741 | FGQTDMSRKAFVFPKESDTS  | Negative |
| P02741 | MEKLLCFLVLTSLSHAFGQT  | Negative |
| P02741 | SLSHAFGQTDMSRKAFVFPK  | Negative |
| P02741 | SRKAFVFPKESDTSYVSLKA  | Negative |
| P02741 | LTSLSHAFGQTDMSRKAFVF  | Negative |
| P02741 | DMSRKAFVFPKESDTSYVSL  | Negative |
| P02741 | TSLSHAFGQTDMSRKAFVFP  | Negative |
| P02741 | LSHAFGQTDMSRKAFVFPKE  | Negative |
| P02741 | PKESDTSYVSLKAPLTKPLK  | Negative |
| P02741 | MSRKAFVFPKESDTSYVSLK  | Negative |
| P02741 | TDMSRKAFVFPKESDTSYVS  | Negative |
| P02741 | QTDMSRKAFVFPKESDTSYV  | Negative |
| P02741 | LVLTSLSHAFGQTDMSRKAF  | Negative |
| P02741 | GQTDMSRKAFVFPKESDTSY  | Negative |
| P02741 | CFLVLTSLSHAFGQTDMSRK  | Negative |
| P02741 | LCFLVLTSLSHAFGQTDMSR  | Negative |
| P02741 | AFGQTDMSRKAFVFPKESDT  | Negative |
| P02741 | RKAFVFPKESDTSYVSLKAP  | Negative |
| P02741 | EKLLCFLVLTSLSHAFGQTD  | Negative |
| P02741 | VLTSLSHAFGQTDMSRKAFV  | Negative |
| P02741 | FLVLTSLSHAFGQTDMSRKA  | Negative |
| P02741 | FVFPKESDTSYVSLKAPLTK  | Negative |
| P02741 | KLLCFLVLTSLSHAFGQTDM  | Negative |
| P02741 | VFPKESDTSYVSLKAPLTKP  | Negative |
| P02741 | KAFVFPKESDTSYVSLKAPL  | Negative |
| P02741 | HAFGQTDMSRKAFVFPKESD  | Negative |
| P02742 | LTLVSFSNMSDQAGMHKKAF  | Negative |
| P02742 | GMHKKAFVFPKESDNSYVSL  | Negative |



|        |                       |          |
|--------|-----------------------|----------|
| P02742 | VFPKESDNSYVSLNAQLKKP  | Negative |
| P02742 | AFVFPKESDNSYVSLNAQLK  | Negative |
| P02742 | FSNMSDQAGMHKKAFVFPKE  | Negative |
| P02742 | KAFVFPKESDNSYVSLNAQL  | Negative |
| P02742 | SNMSDQAGMHKKAFVFPKES  | Negative |
| P02742 | VSFSNMSDQAGMHKKAFVFP  | Negative |
| P02742 | AGMHKKAFVFPKESDNSYVS  | Negative |
| P02742 | MSDQAGMHKKAFVFPKESDN  | Negative |
| P02742 | LVSFSNMSDQAGMHKKAFVF  | Negative |
| P02742 | KLLWCFLTLVSFSNMSDQAG  | Negative |
| P02742 | EKLLWCFLTLVSFSNMSDQA  | Negative |
| P02742 | FPKESDNSYVSLNAQLKKPL  | Negative |
| P02742 | QAGMHKKAFVFPKESDNSYV  | Negative |
| P02742 | HKKAFVFPKESDNSYVSLNA  | Negative |
| P02742 | DQAGMHKKAFVFPKESDNSY  | Negative |
| P02742 | SDQAGMHKKAFVFPKESDNS  | Negative |
| P02742 | NMSDQAGMHKKAFVFPKESD  | Negative |
| P02742 | FVFPKESDNSYVSLNAQLKK  | Negative |
| P02742 | MEKLLWCFLTLVSFSNMSDQ  | Negative |
| P02742 | SFSNMSDQAGMHKKAFVFPK  | Negative |
| P02742 | MHKKAFVFPKESDNSYVSLN  | Negative |
| P02742 | LWCFLTLVSFSNMSDQAGMH  | Negative |
| P02742 | LLWCFLTLVSFSNMSDQAGM  | Negative |
| P02742 | TLVSFSNMSDQAGMHKKAFV  | Negative |
| P02742 | FLTLVSFSNMSDQAGMHKKA  | Negative |
| P02742 | CFLTLVSFSNMSDQAGMHKK  | Negative |
| P02742 | KKAFVFPKESDNSYVSLNAQ  | Negative |
| P02743 | FVFPRESVTDHVNLTIPLEK  | Negative |
| P02743 | SLLEAFAHTDLSGKVFVFP   | Negative |
| P02743 | SVLTSLEAFAHTDLSGKVF   | Negative |
| P02743 | SGKVFVFPRESVTDHVNLT   | Negative |
| P02743 | LWISVLTSLEAFAHTDLSG   | Negative |
| P02743 | KPLLWISVLTSLEAFAHTD   | Negative |
| P02743 | PLLWISVLTSLEAFAHTDL   | Negative |
| P02743 | FPRESVTDHVNLTIPLEKPL  | Negative |
| P02743 | LEAFAHTDLSGKVFVFPRES  | Negative |
| P02743 | LTSLEAFAHTDLSGKVFVF   | Negative |
| P02743 | NKPLLWISVLTSLEAFAHT   | Negative |
| P02743 | FAHTDLSGKVFVFPRESVTD  | Negative |
| P02743 | AHTDLSGKVFVFPRESVTDH  | Negative |
| P02743 | TSLLEAFAHTDLSGKVFVFP  | Negative |
| P02743 | LLEAFAHTDLSGKVFVFPRE  | Negative |
| P02743 | DLSGKVFVFPRESVTDHVNLI | Negative |
| P02743 | VFPRESVTDHVNLTIPLEKP  | Negative |
| P02743 | AFAHTDLSGKVFVFPRESVT  | Negative |
| P02743 | LSGKVFVFPRESVTDHVNLI  | Negative |

|        |                       |          |
|--------|-----------------------|----------|
| P02743 | VLTSLLFAAHTDLSGKVFV   | Negative |
| P02743 | TDLSGKVFVPRESVTDHVN   | Negative |
| P02743 | WISVLTSLLFAAHTDLSGK   | Negative |
| P02743 | VFVFPRESVTDHVNLTIPLE  | Negative |
| P02743 | MNKPLLWISVLTSLLFAAH   | Negative |
| P02743 | GKVFVFPRESVTDHVNLTIP  | Negative |
| P02743 | EAAHTDLSGKVFVFPRESV   | Negative |
| P02743 | HTDLSGKVFVFPRESVTDHV  | Negative |
| P02743 | KVFVFPRESVTDHVNLTPL   | Negative |
| P02743 | ISVLTSLLFAAHTDLSGKV   | Negative |
| P02745 | EDLCRAPDGKKGEAGRPGR   | Negative |
| P02745 | ASMTEDLCRAPDGKKGEAG   | Negative |
| P02745 | LCRAPDGKKGEAGRPGRGR   | Negative |
| P02745 | DGKKGEAGRPGRGRPGLKG   | Negative |
| P02745 | TELCRAPDGKKGEAGRPGR   | Negative |
| P02745 | ASLASMTEDLCRAPDGKK    | Negative |
| P02745 | CRAPDGKKGEAGRPGRGRP   | Negative |
| P02745 | WLVLCVLAISLASMTEDLC   | Negative |
| P02745 | PDGKKGEAGRPGRGRPGLK   | Negative |
| P02745 | SLASMTEDLCRAPDGKKGE   | Negative |
| P02745 | GWLVLCVLAISLASMTEDL   | Negative |
| P02745 | LASLASMTEDLCRAPDGK    | Negative |
| P02745 | DLCRAPDGKKGEAGRPGRG   | Negative |
| P02745 | LASMTEDLCRAPDGKKGEA   | Negative |
| P02745 | LCVLAISLASMTEDLCRAP   | Negative |
| P02745 | PRGWLVLCVLAISLASMT    | Negative |
| P02745 | EGPRGWLVLCVLAISLASMT  | Negative |
| P02745 | VLAISLASMTEDLCRAPDG   | Negative |
| P02745 | CVLAISLASMTEDLCRAPD   | Negative |
| P02745 | VTEDLCRAPDGKKGEAGRP   | Negative |
| P02745 | APDGKKGEAGRPGRGRPGL   | Negative |
| P02745 | GPRGWLVLCVLAISLASMT   | Negative |
| P02745 | RAPDGKKGEAGRPGRGRPG   | Negative |
| P02745 | RGWLVLCVLAISLASMTED   | Negative |
| P02745 | MTEDLCRAPDGKKGEAGRP   | Negative |
| P02745 | MEGPRGWLVLCVLAISLASMT | Negative |
| P02745 | SMVTEDLCRAPDGKKGEAGR  | Negative |
| P02745 | ISLASMTEDLCRAPDGKKG   | Negative |
| P02745 | VLCVLAISLASMTEDLCRA   | Negative |
| P02746 | PWGSIPVLMLLLLGLIDIS   | Negative |
| P02746 | IPVLMLLLLGLIDISQAQL   | Negative |
| P02746 | MMMKIPWGSIPVLMLLLLG   | Negative |
| P02746 | GLIDISQAQLSCTGPPAIPG  | Negative |
| P02746 | LLLLGLIDISQAQLSCTGP   | Negative |
| P02746 | LLLLGLIDISQAQLSCTGPP  | Negative |
| P02746 | ISQAQLSCTGPPAIPGIPGI  | Negative |

|        |                       |          |
|--------|-----------------------|----------|
| P02746 | LSCTGPPAIPGIPGIPGTPG  | Negative |
| P02746 | KIPWGSIPVLMLLLLLGLID  | Negative |
| P02746 | MMKIPWGSIPVLMLLLLLGL  | Negative |
| P02746 | LLLGLIDISQAQLSCTGPPA  | Negative |
| P02746 | LLGLIDISQAQLSCTGPPAI  | Negative |
| P02746 | PVLMLLLLLGLIDISQAQLS  | Negative |
| P02746 | WGSIPVLMLLLLLGLIDISQ  | Negative |
| P02746 | LGLIDISQAQLSCTGPPAIP  | Negative |
| P02746 | IDISQAQLSCTGPPAIPGIP  | Negative |
| P02746 | LIDISQAQLSCTGPPAIPGI  | Negative |
| P02746 | IPWGSIPVLMLLLLLGLIDI  | Negative |
| P02746 | AQLSCTGPPAIPGIPGIPGT  | Negative |
| P02746 | MKIPWGSIPVLMLLLLLGLI  | Negative |
| P02746 | VLMLLLLLLGLIDISQAQLSC | Negative |
| P02746 | SIPVLMLLLLLGLIDISQAQ  | Negative |
| P02746 | MLLLLLLGLIDISQAQLSCTG | Negative |
| P02746 | SCTGPPAIPGIPGIPGTPGP  | Negative |
| P02746 | QAQLSCTGPPAIPGIPGIPG  | Negative |
| P02746 | GSIPVLMLLLLLGLIDISQA  | Negative |
| P02746 | QLSCTGPPAIPGIPGIPGTP  | Negative |
| P02746 | SQAQLSCTGPPAIPGIPGIP  | Negative |
| P02746 | DISQAQLSCTGPPAIPGIPG  | Negative |
| P02747 | MDVGPSSLPHLGLKLLLLLL  | Negative |
| P02747 | LPHLGLKLLLLLLLLLPLRGQ | Negative |
| P02747 | HLGLKLLLLLLLLLPLRGQAN | Negative |
| P02747 | LLLLLLLLLPLRGQANTGCYG | Negative |
| P02747 | PSSLPHLGLKLLLLLLLLLPL | Negative |
| P02747 | LRGQANTGCYGIPGMPGLPG  | Negative |
| P02747 | SLPHLGLKLLLLLLLLLPLRG | Negative |
| P02747 | LLLLLLPLRGQANTGCYGIP  | Negative |
| P02747 | LLPLRGQANTGCYGIPGMPG  | Negative |
| P02747 | TGCYGIPGMPGLPGAPGKDG  | Negative |
| P02747 | GQANTGCYGIPGMPGLPGAP  | Negative |
| P02747 | GLKLLLLLLLLLPLRGQANTG | Negative |
| P02747 | NTGCYGIPGMPGLPGAPGKD  | Negative |
| P02747 | LLLLLLPLRGQANTGCYGI   | Negative |
| P02747 | DVGPSSLPHLGLKLLLLLL   | Negative |
| P02747 | GPSSLPHLGLKLLLLLLLLLP | Negative |
| P02747 | SSLPHLGLKLLLLLLLLLPLR | Negative |
| P02747 | LLLPLRGQANTGCYGIPGMP  | Negative |
| P02747 | ANTGCYGIPGMPGLPGAPGK  | Negative |
| P02747 | LPLRGQANTGCYGIPGMPGL  | Negative |
| P02747 | VGPSLPHLGLKLLLLLLLL   | Negative |
| P02747 | RGQANTGCYGIPGMPGLPGA  | Negative |
| P02747 | LLLLLPLRGQANTGCYGIPG  | Negative |
| P02747 | LGLKLLLLLLLLLPLRGQANT | Negative |

|        |                       |          |
|--------|-----------------------|----------|
| P02747 | LLLLPLRGQANTGCYGIPGM  | Negative |
| P02747 | QANTGCYGIPGMPGLPGAPG  | Negative |
| P02747 | LKLLLLLLLLPLRGQANTGC  | Negative |
| P02747 | PLRGQANTGCYGIPGMPGLP  | Negative |
| P02747 | PHLGLKLLLLLLLLPLRGQA  | Negative |
| P02749 | PKPDDLPFSTVVPLKTFYEP  | Negative |
| P02749 | CPKPDDLPFSTVVPLKTFYE  | Negative |
| P02749 | PDDLPFSTVVPLKTFYEPGE  | Negative |
| P02749 | PFSTVVPLKTFYEPGEEITY  | Negative |
| P02749 | DLPFSTVVPLKTFYEPGEEI  | Negative |
| P02749 | HVAIAGRTCPKPDDLPFSTV  | Negative |
| P02749 | ISPVILILFSSFLCHVAIAGR | Negative |
| P02749 | FSSFLCHVAIAGRTCPKPDD  | Negative |
| P02749 | KPDDLPFSTVVPLKTFYEPG  | Negative |
| P02749 | IAGRTCPKPDDLPFSTVVPL  | Negative |
| P02749 | SSFLCHVAIAGRTCPKPDDL  | Negative |
| P02749 | AIAGRTCPKPDDLPFSTVVP  | Negative |
| P02749 | LILFSSFLCHVAIAGRTCPK  | Negative |
| P02749 | MISPVILILFSSFLCHVAIAG | Negative |
| P02749 | FLCHVAIAGRTCPKPDDLPF  | Negative |
| P02749 | RTCPKPDDLPFSTVVPLKTF  | Negative |
| P02749 | TCPKPDDLPFSTVVPLKTFY  | Negative |
| P02749 | CHVAIAGRTCPKPDDLPFST  | Negative |
| P02749 | VAIAGRTCPKPDDLPFSTVV  | Negative |
| P02749 | PVLILFSSFLCHVAIAGRTC  | Negative |
| P02749 | SFLCHVAIAGRTCPKPDDL   | Negative |
| P02749 | LCHVAIAGRTCPKPDDL     | Negative |
| P02749 | LFSSFLCHVAIAGRTCPKPD  | Negative |
| P02749 | DDLPFSTVVPLKTFYEPGEE  | Negative |
| P02749 | SPVLILFSSFLCHVAIAGRT  | Negative |
| P02749 | LPFSTVVPLKTFYEPGEEIT  | Negative |
| P02749 | AGRTCPKPDDLPFSTVVPLK  | Negative |
| P02749 | ILFSSFLCHVAIAGRTCPKP  | Negative |
| P02749 | GRTCPKPDDLPFSTVVPLKT  | Negative |
| P02750 | SPGGIQPHVSRTLFLLLLLA  | Negative |
| P02750 | RPKSPGGIQPHVSRTLFLLL  | Negative |
| P02750 | MSSWSRQRPKSPGGIQPHVS  | Negative |
| P02750 | KSPGGIQPHVSRTLFLLLLL  | Negative |
| P02750 | IQPHVSRTLFLLLLLAASAW  | Negative |
| P02750 | VSRTLFLLLLLAASAWGVTL  | Negative |
| P02750 | SWSRQRPKSPGGIQPHVSRT  | Negative |
| P02750 | LFLLLLLAASAWGVTLSPKD  | Negative |
| P02750 | TLFLLLLLAASAWGVTLSPK  | Negative |
| P02750 | PKSPGGIQPHVSRTLFLLLL  | Negative |
| P02750 | SRTLFLLLLLAASAWGVTLS  | Negative |
| P02750 | LLLLLAASAWGVTLSPKDCQ  | Negative |

|        |                       |          |
|--------|-----------------------|----------|
| P02750 | SRQRPKSPGGIQPHVSRTLFL | Negative |
| P02750 | FLLLLLAASAWGVTLSPKDC  | Negative |
| P02750 | GGIQPHVSRTLFLLLLLAAS  | Negative |
| P02750 | LLLAASAWGVTLSPKDCQVF  | Negative |
| P02750 | RQRPKSPGGIQPHVSRTLFL  | Negative |
| P02750 | PHVSRTLFLLLLLAASAWGV  | Negative |
| P02750 | QPHVSRTLFLLLLLAASAWG  | Negative |
| P02750 | SSWSRQRPKSPGGIQPHVSR  | Negative |
| P02750 | QRPKSPGGIQPHVSRTLFL   | Negative |
| P02750 | AASAWGVTLSPKDCQVFRSD  | Negative |
| P02750 | LLAASAWGVTLSPKDCQVFR  | Negative |
| P02750 | PGGIQPHVSRTLFLLLLLAA  | Negative |
| P02750 | HVSRTLFLLLLLAASAWGV   | Negative |
| P02750 | GIQPHVSRTLFLLLLLAASA  | Negative |
| P02750 | LAASAWGVTLSPKDCQVFRS  | Negative |
| P02750 | LLLLAASAWGVTLSPKDCQV  | Negative |
| P02750 | WSRQRPKSPGGIQPHVSRTL  | Negative |
| P02751 | VPSTGASKSKRQAQQMVQPQ  | Negative |
| P02751 | AVPSTGASKSKRQAQQMVQP  | Negative |
| P02751 | LLAVQCLGTAVPSTGASKSK  | Negative |
| P02751 | LAVQCLGTAVPSTGASKSKR  | Negative |
| P02751 | LRGPGPGLLLLAVQCLGTAV  | Negative |
| P02751 | TGASKSKRQAQQMVQPQSPV  | Negative |
| P02751 | KRQAQQMVQPQSPVAVSQSK  | Negative |
| P02751 | SKSKRQAQQMVQPQSPVAVS  | Negative |
| P02751 | RGPGPGLLLLAVQCLGTAVP  | Negative |
| P02751 | VQCLGTAVPSTGASKSKRQA  | Negative |
| P02751 | GTAVPSTGASKSKRQAQQMV  | Negative |
| P02751 | ASKSKRQAQQMVQPQSPVAV  | Negative |
| P02751 | SKRQAQQMVQPQSPVAVSQS  | Negative |
| P02751 | GLLLLAVQCLGTAVPSTGAS  | Negative |
| P02751 | LLLAVQCLGTAVPSTGASK   | Negative |
| P02751 | QCLGTAVPSTGASKSKRQAQ  | Negative |
| P02751 | GPGPGLLLLAVQCLGTAVPS  | Negative |
| P02751 | MLRGPGPGLLLLAVQCLGTA  | Negative |
| P02751 | TAVPSTGASKSKRQAQQMVQ  | Negative |
| P02751 | PGPGLLLLAVQCLGTAVPST  | Negative |
| P02751 | GASKSKRQAQQMVQPQSPVA  | Negative |
| P02751 | PSTGASKSKRQAQQMVQPQS  | Negative |
| P02751 | KSKRQAQQMVQPQSPVAVSQ  | Negative |
| P02751 | CLGTAVPSTGASKSKRQAQQ  | Negative |
| P02751 | LLAVQCLGTAVPSTGASKS   | Negative |
| P02751 | GPGLLLLAVQCLGTAVPSTG  | Negative |
| P02751 | STGASKSKRQAQQMVQPQSP  | Negative |
| P02751 | PGLLLLAVQCLGTAVPSTGA  | Negative |
| P02751 | AVQCLGTAVPSTGASKSKRQ  | Negative |

|        |                      |          |
|--------|----------------------|----------|
| P02752 | SSTCQQYGCLEGDTHKANPS | Negative |
| P02752 | MLRFAITLFAVITSSTCQQY | Negative |
| P02752 | CLEGDTHKANPSPEPNMHEC | Negative |
| P02752 | TLFAVITSSTCQQYGCLEGD | Negative |
| P02752 | LEGDTHKANPSPEPNMHECT | Negative |
| P02752 | FAITLFAVITSSTCQQYGCL | Negative |
| P02752 | TSSTCQQYGCLEGDTHKANP | Negative |
| P02752 | LRFAITLFAVITSSTCQQYG | Negative |
| P02752 | THKANPSPEPNMHECTLYSE | Negative |
| P02752 | HKANPSPEPNMHECTLYSES | Negative |
| P02752 | GDTHKANPSPEPNMHECTLY | Negative |
| P02752 | EGDTHKANPSPEPNMHECTL | Negative |
| P02752 | GCLEGDTHKANPSPEPNMHE | Negative |
| P02752 | CQQYGCLEGDTHKANPSPEP | Negative |
| P02752 | STCQQYGCLEGDTHKANPSP | Negative |
| P02752 | KANPSPEPNMHECTLYSESS | Negative |
| P02752 | ITSSTCQQYGCLEGDTHKAN | Negative |
| P02752 | DTHKANPSPEPNMHECTLYS | Negative |
| P02752 | YGCLEGDTHKANPSPEPNMH | Negative |
| P02752 | AVITSSTCQQYGCLEGDTHK | Negative |
| P02752 | QYGCLEGDTHKANPSPEPNM | Negative |
| P02752 | VITSSTCQQYGCLEGDTHKA | Negative |
| P02752 | ITLFAVITSSTCQQYGCLEG | Negative |
| P02752 | TCQQYGCLEGDTHKANPSPE | Negative |
| P02752 | QQYGCLEGDTHKANPSPEPN | Negative |
| P02752 | ANPSPEPNMHECTLYSESSC | Negative |
| P02752 | AITLFAVITSSTCQQYGCLE | Negative |
| P02752 | FAVITSSTCQQYGCLEGDTH | Negative |
| P02752 | LFAVITSSTCQQYGCLEGDT | Negative |
| P02753 | ERDCRVSSFRVKENFDKARF | Negative |
| P02753 | RAERDCRVSSFRVKENFDKA | Negative |
| P02753 | WALLLLAALGSGRAERDCRV | Negative |
| P02753 | AALGSGRAERDCRVSSFRVK | Negative |
| P02753 | SFRVKENFDKARFSGTWYAM | Negative |
| P02753 | WWALLLLAALGSGRAERDC  | Negative |
| P02753 | AERDCRVSSFRVKENFDKAR | Negative |
| P02753 | VKENFDKARFSGTWYAMAKK | Negative |
| P02753 | RVSSFRVKENFDKARFSGTW | Negative |
| P02753 | KENFDKARFSGTWYAMAKKD | Negative |
| P02753 | KWVWALLLLAALGSGRAERD | Negative |
| P02753 | VSSFRVKENFDKARFSGTWY | Negative |
| P02753 | SSFRVKENFDKARFSGTWYA | Negative |
| P02753 | MKWVWALLLLAALGSGRAER | Negative |
| P02753 | LLLAALGSGRAERDCRVSSF | Negative |
| P02753 | LAALGSGRAERDCRVSSFRV | Negative |
| P02753 | LLAALGSGRAERDCRVSSFR | Negative |

|        |                      |          |
|--------|----------------------|----------|
| P02753 | CRVSSFRVKENFDKARFSGT | Negative |
| P02753 | ALLLLAALGSGRAERDCRV  | Negative |
| P02753 | GSGRAERDCRVSSFRVKENF | Negative |
| P02753 | LGSGRAERDCRVSSFRVKEN | Negative |
| P02753 | RDCRVSSFRVKENFDKARFS | Negative |
| P02753 | GRAERDCRVSSFRVKENFDK | Negative |
| P02753 | DCRVSSFRVKENFDKARFSG | Negative |
| P02753 | ALGSGRAERDCRVSSFRVKE | Negative |
| P02753 | FRVKENFDKARFSGTWYAMA | Negative |
| P02753 | RVKENFDKARFSGTWYAMAK | Negative |
| P02753 | LLLLAALGSGRAERDCRVSS | Negative |
| P02753 | SGRAERDCRVSSFRVKENFD | Negative |
| P02754 | GAQALIVTQTMKGLDIQKVA | Negative |
| P02754 | TQTMKGLDIQKVAGTWYSLA | Negative |
| P02754 | CLLLALALTCGAQALIVTQT | Negative |
| P02754 | LALALTCGAQALIVTQTMKG | Negative |
| P02754 | MKCLLLALALTCGAQALIVT | Negative |
| P02754 | QTMKGLDIQKVAGTWYSLAM | Negative |
| P02754 | KGLDIQKVAGTWYSLAMAAS | Negative |
| P02754 | LTCGAQALIVTQTMKGLDIQ | Negative |
| P02754 | LIVTQTMKGLDIQKVAGTWY | Negative |
| P02754 | VTQTMKGLDIQKVAGTWYSL | Negative |
| P02754 | LLALALTCGAQALIVTQTMK | Negative |
| P02754 | CGAQALIVTQTMKGLDIQKV | Negative |
| P02754 | KVAGTWYSLAMAASDISLLD | Negative |
| P02754 | QALIVTQTMKGLDIQKVAGT | Negative |
| P02754 | IVTQTMKGLDIQKVAGTWYS | Negative |
| P02754 | ALIVTQTMKGLDIQKVAGTW | Negative |
| P02754 | QKVAGTWYSLAMAASDISLL | Negative |
| P02754 | TCGAQALIVTQTMKGLDIQK | Negative |
| P02754 | DIQKVAGTWYSLAMAASDIS | Negative |
| P02754 | MKGLDIQKVAGTWYSLAMAA | Negative |
| P02754 | LALTCGAQALIVTQTMKGLD | Negative |
| P02754 | ALTCGAQALIVTQTMKGLDI | Negative |
| P02754 | GLDIQKVAGTWYSLAMAASD | Negative |
| P02754 | TMKGLDIQKVAGTWYSLAMA | Negative |
| P02754 | IQKVAGTWYSLAMAASDISL | Negative |
| P02754 | AQALIVTQTMKGLDIQKVAG | Negative |
| P02754 | LLLALALTCGAQALIVTQTM | Negative |
| P02754 | ALALTCGAQALIVTQTMKGL | Negative |
| P02754 | LDIQKVAGTWYSLAMAASDI | Negative |
| P02755 | VTQTMKGLDIQKVAGTWYSL | Negative |
| P02755 | CAAQAIIVTQTMKGLDIQKV | Negative |
| P02755 | TMKGLDIQKVAGTWYSLAMA | Negative |
| P02755 | ALGLALACAAQAIIVTQTMK | Negative |
| P02755 | IQKVAGTWYSLAMAASDISL | Negative |

|        |                      |          |
|--------|----------------------|----------|
| P02755 | LALACAAQAIIVTQTMKGLD | Negative |
| P02755 | MKGLDIQKVAGTWYSLAMAA | Negative |
| P02755 | LACAAQAIIVTQTMKGLDIQ | Negative |
| P02755 | KGLDIQKVAGTWYSLAMAAS | Negative |
| P02755 | GLALACAAQAIIVTQTMKGL | Negative |
| P02755 | DIQKVAGTWYSLAMAASDIS | Negative |
| P02755 | ACAAQAIIVTQTMKGLDIQK | Negative |
| P02755 | GLDIQKVAGTWYSLAMAASD | Negative |
| P02755 | LDIQKVAGTWYSLAMAASDI | Negative |
| P02755 | LLALGLALACAAQAIIVTQT | Negative |
| P02755 | AIIVTQTMKGLDIQKVAGTW | Negative |
| P02755 | ALACAAQAIIVTQTMKGLDI | Negative |
| P02755 | IIVTQTMKGLDIQKVAGTWY | Negative |
| P02755 | AAQAIIVTQTMKGLDIQKVA | Negative |
| P02755 | IVTQTMKGLDIQKVAGTWYS | Negative |
| P02755 | AQAIIVTQTMKGLDIQKVAG | Negative |
| P02755 | QTMKGLDIQKVAGTWYSLAM | Negative |
| P02755 | CLLLALGLALACAAQAIIVT | Negative |
| P02755 | LALGLALACAAQAIIVTQTM | Negative |
| P02755 | LGLALACAAQAIIVTQTMKG | Negative |
| P02755 | MKCLLLALGLALACAAQAI  | Negative |
| P02755 | KCLLLALGLALACAAQAIIV | Negative |
| P02755 | TQTMKGLDIQKVAGTWYSLA | Negative |
| P02755 | QAIIVTQTMKGLDIQKVAGT | Negative |
| P02756 | IVTQTMKGLDIQKVAGTWYS | Negative |
| P02756 | DIQKVAGTWYSLAMAASDIS | Negative |
| P02756 | LACGIQAIIVTQTMKGLDIQ | Negative |
| P02756 | KCLLLALGLALACGIQAIIV | Negative |
| P02756 | LGLALACGIQAIIVTQTMKG | Negative |
| P02756 | MKGLDIQKVAGTWYSLAMAA | Negative |
| P02756 | VTQTMKGLDIQKVAGTWYSL | Negative |
| P02756 | CLLLALGLALACGIQAIIVT | Negative |
| P02756 | IQKVAGTWYSLAMAASDISL | Negative |
| P02756 | KGLDIQKVAGTWYSLAMAAS | Negative |
| P02756 | MKCLLLALGLALACGIQAI  | Negative |
| P02756 | QTMKGLDIQKVAGTWYSLAM | Negative |
| P02756 | TQTMKGLDIQKVAGTWYSLA | Negative |
| P02756 | CGIQAIIVTQTMKGLDIQKV | Negative |
| P02756 | LLALGLALACGIQAIIVTQT | Negative |
| P02756 | ALGLALACGIQAIIVTQTMK | Negative |
| P02756 | TMKGLDIQKVAGTWYSLAMA | Negative |
| P02756 | LDIQKVAGTWYSLAMAASDI | Negative |
| P02756 | LALACGIQAIIVTQTMKGLD | Negative |
| P02756 | IIVTQTMKGLDIQKVAGTWY | Negative |
| P02756 | QAIIVTQTMKGLDIQKVAGT | Negative |
| P02756 | LALGLALACGIQAIIVTQTM | Negative |



|        |                       |          |
|--------|-----------------------|----------|
| P02756 | GIQAIIVTQTMKGLDIQKVA  | Negative |
| P02756 | GLALACGIQAIIVTQTMKGL  | Negative |
| P02756 | ALACGIQAIIVTQTMKGLDI  | Negative |
| P02756 | IQAIIVTQTMKGLDIQKVAG  | Negative |
| P02756 | AIIVTQTMKGLDIQKVAGTW  | Negative |
| P02756 | GLDIQKVAGTWYSLAMAASD  | Negative |
| P02756 | ACGIQAIIVTQTMKGLDIQK  | Negative |
| P02758 | KCLLLALGLALMCGIQATNI  | Negative |
| P02758 | GLALMCGIQATNIPQTMQDL  | Negative |
| P02758 | ATNIPQTMQDLDLQEVAGKW  | Negative |
| P02758 | QDLDLQEVAGKWHSVAMAAS  | Negative |
| P02758 | LMCGIQATNIPQTMQDLDLQ  | Negative |
| P02758 | CGIQATNIPQTMQDLDLQEV  | Negative |
| P02758 | DLDLQEVAGKWHSVAMAASD  | Negative |
| P02758 | MKCLLLALGLALMCGIQATN  | Negative |
| P02758 | NIPQTMQDLDLQEVAGKWS   | Negative |
| P02758 | GIQATNIPQTMQDLDLQEVA  | Negative |
| P02758 | LALGLALMCGIQATNIPQTM  | Negative |
| P02758 | LGLALMCGIQATNIPQTMQD  | Negative |
| P02758 | LALMCGIQATNIPQTMQDL   | Negative |
| P02758 | LLALGLALMCGIQATNIPQT  | Negative |
| P02758 | LDLQEVAGKWHSVAMAASDI  | Negative |
| P02758 | IQATNIPQTMQDLDLQEVAG  | Negative |
| P02758 | ALMCGIQATNIPQTMQDL    | Negative |
| P02758 | PQTMQDLDLQEVAGKWSVA   | Negative |
| P02758 | MQDLDLQEVAGKWHSVAMAA  | Negative |
| P02758 | DLQEVAGKWHSVAMAASDIS  | Negative |
| P02758 | LQEVAGKWHSVAMAASDISL  | Negative |
| P02758 | QATNIPQTMQDLDLQEVAGK  | Negative |
| P02758 | ALGLALMCGIQATNIPQTMQ  | Negative |
| P02758 | QTMQDLDLQEVAGKWHSVAM  | Negative |
| P02758 | TMQDLDLQEVAGKWHSVAMA  | Negative |
| P02758 | MCGIQATNIPQTMQDLDLQE  | Negative |
| P02758 | TNIPQTMQDLDLQEVAGKWH  | Negative |
| P02758 | CLLLALGLALMCGIQATNIP  | Negative |
| P02758 | IPQTMQDLDLQEVAGKWSV   | Negative |
| P02760 | QVQENFNISRIYGKWNLA    | Negative |
| P02760 | LLLSACLA VSAGPVPTPPDN | Negative |
| P02760 | CLAVSAGPVPTPPDNIQVQE  | Negative |
| P02760 | SAGPVPTPPDNIQVQENFNI  | Negative |
| P02760 | TPPDNIQVQENFNISRIYGK  | Negative |
| P02760 | LLLLLSACLA VSAGPVPTPP | Negative |
| P02760 | PDNIQVQENFNISRIYGKWI  | Negative |
| P02760 | AGPVPTPPDNIQVQENFNIS  | Negative |
| P02760 | ACLAVSAGPVPTPPDNIQVQ  | Negative |
| P02760 | IQVQENFNISRIYGKWNLA   | Negative |

|        |                      |          |
|--------|----------------------|----------|
| P02760 | LSACLAVSAGPVPTPPDNIQ | Negative |
| P02760 | VSAGPVPTPPDNIQVQENFN | Negative |
| P02760 | AVSAGPVPTPPDNIQVQENF | Negative |
| P02760 | PPDNIQVQENFNISRIYGKW | Negative |
| P02760 | LAVSAGPVPTPPDNIQVQEN | Negative |
| P02760 | PTPPDNIQVQENFNISRIYG | Negative |
| P02760 | NIQVQENFNISRIYGKWYNL | Negative |
| P02760 | PVPTPPDNIQVQENFNISRI | Negative |
| P02760 | SLGALLLLLSACLAVSAGPV | Negative |
| P02760 | GPVPTPPDNIQVQENFNISR | Negative |
| P02760 | LLSACLAVSAGPVPTPPDNI | Negative |
| P02760 | ALLLLLSACLAVSAGPVPTP | Negative |
| P02760 | RSLGALLLLLSACLAVSAGP | Negative |
| P02760 | LGALLLLLSACLAVSAGPVP | Negative |
| P02760 | MRSLGALLLLLSACLAVSAG | Negative |
| P02760 | LLLLSACLAVSAGPVPTPPD | Negative |
| P02760 | DNIQVQENFNISRIYGKWYN | Negative |
| P02760 | SACLAVSAGPVPTPPDNIQV | Negative |
| P02760 | VPTPPDNIQVQENFNISRIY | Negative |
| P02761 | GNLDVAKLNGDWFSIVVASN | Negative |
| P02761 | CLGLTLVCGHAEASSTRGN  | Negative |
| P02761 | ASSTRGNLDVAKLNGDWFSI | Negative |
| P02761 | LTLVCGHAEASSTRGNLDV  | Negative |
| P02761 | LDVAKLNGDWFSIVVASNKR | Negative |
| P02761 | LVCGHAEASSTRGNLDVAK  | Negative |
| P02761 | DVAKLNGDWFSIVVASNKRE | Negative |
| P02761 | GLTLVCGHAEASSTRGNLD  | Negative |
| P02761 | TLVCGHAEASSTRGNLDVA  | Negative |
| P02761 | AEEASSTRGNLDVAKLNGDW | Negative |
| P02761 | LLLLLCLGLTLVCGHAEAA  | Negative |
| P02761 | LLLCLGLTLVCGHAEASST  | Negative |
| P02761 | HAEASSTRGNLDVAKLNGD  | Negative |
| P02761 | LLCLGLTLVCGHAEASSTR  | Negative |
| P02761 | MKLLLLLCLGLTLVCGHAE  | Negative |
| P02761 | LGLTLVCGHAEASSTRGNL  | Negative |
| P02761 | LLLLLCLGLTLVCGHAEAS  | Negative |
| P02761 | STRGNLDVAKLNGDWFSIVV | Negative |
| P02761 | RGNLDVAKLNGDWFSIVVAS | Negative |
| P02761 | EASSTRGNLDVAKLNGDWFS | Negative |
| P02761 | NLDVAKLNGDWFSIVVASNK | Negative |
| P02761 | KLLLLLCLGLTLVCGHAE   | Negative |
| P02761 | SSTRGNLDVAKLNGDWFSIV | Negative |
| P02761 | GHAEEASSTRGNLDVAKLNG | Negative |
| P02761 | VCGHAEASSTRGNLDVAKL  | Negative |
| P02761 | CGHAEASSTRGNLDVAKLN  | Negative |
| P02761 | LCLGLTLVCGHAEASSTRG  | Negative |

|        |                       |          |
|--------|-----------------------|----------|
| P02761 | TRGNLDVAKLNGDWFSIVVA  | Negative |
| P02761 | EEASSTRGNLDVAKLNGDWF  | Negative |
| P02763 | PITNATLDQITGKWFYIASA  | Negative |
| P02763 | SLLPLLEAQIPLCANLVPVP  | Negative |
| P02763 | PLCANLVPVPITNATLDQIT  | Negative |
| P02763 | CANLVPVPITNATLDQITGK  | Negative |
| P02763 | LLEAQIPLCANLVPVPITNA  | Negative |
| P02763 | TVLSLLPLLEAQIPLCANLV  | Negative |
| P02763 | VPITNATLDQITGKWFYIAS  | Negative |
| P02763 | LLPLLEAQIPLCANLVPVPI  | Negative |
| P02763 | LPLLEAQIPLCANLVPVPIT  | Negative |
| P02763 | AQIPLCANLVPVPITNATLD  | Negative |
| P02763 | VPVPITNATLDQITGKWFYI  | Negative |
| P02763 | PVPITNATLDQITGKWFYIA  | Negative |
| P02763 | NLVPVPITNATLDQITGKWF  | Negative |
| P02763 | LSLLPLLEAQIPLCANLVPV  | Negative |
| P02763 | QIPLCANLVPVPITNATLDQ  | Negative |
| P02763 | IPLCANLVPVPITNATLDQI  | Negative |
| P02763 | VLSLLPLLEAQIPLCANLVP  | Negative |
| P02763 | LEAQIPLCANLVPVPITNAT  | Negative |
| P02763 | LTVLSLLPLLEAQIPLCANL  | Negative |
| P02763 | LVPVPITNATLDQITGKWFY  | Negative |
| P02763 | LCANLVPVPITNATLDQITG  | Negative |
| P02763 | VLTVLSLLPLLEAQIPLCAN  | Negative |
| P02763 | WVLTVLSLLPLLEAQIPLCA  | Negative |
| P02763 | LSWVLTVLSLLPLLEAQIPL  | Negative |
| P02763 | EAQIPLCANLVPVPITNATL  | Negative |
| P02763 | MALSWVLTVLSLLPLLEAQI  | Negative |
| P02763 | ALSWVLTVLSLLPLLEAQIP  | Negative |
| P02763 | ANLVPVPITNATLDQITGKW  | Negative |
| P02763 | PLLEAQIPLCANLVPVPITN  | Negative |
| P02765 | VLLLCLAQLWGCHSAPHGPG  | Negative |
| P02765 | PGLIYRQPNCDDEPETEEAAL | Negative |
| P02765 | LWGCHSAPHGPGLIYRQPN   | Negative |
| P02765 | SLVLLLCLAQLWGCHSAPHG  | Negative |
| P02765 | APHGPGLIYRQPNCDDEPETE | Negative |
| P02765 | LIYRQPNCDDEPETEEAALVA | Negative |
| P02765 | GPGLIYRQPNCDDEPETEEAA | Negative |
| P02765 | QLWGCHSAPHGPGLIYRQPN  | Negative |
| P02765 | CLAQLWGCHSAPHGPGLIYR  | Negative |
| P02765 | CHSAPHGPGLIYRQPNCDDEP | Negative |
| P02765 | HGPGLIYRQPNCDDEPETEEA | Negative |
| P02765 | SAPHGPGLIYRQPNCDDEPET | Negative |
| P02765 | LLCLAQLWGCHSAPHGPGLI  | Negative |
| P02765 | PNCDDPETEEAALVAIDYIN  | Negative |
| P02765 | PHGPGLIYRQPNCDDEPETEE | Negative |

|        |                       |          |
|--------|-----------------------|----------|
| P02765 | IYRQPNCDDPETEEAALVAI  | Negative |
| P02765 | MKSLVLLLCLAQLWGCHSAP  | Negative |
| P02765 | LCLAQLWGCHSAPHGPGLIY  | Negative |
| P02765 | LAQLWGCHSAPHGPGLIYRQ  | Negative |
| P02765 | HSAPHGPGLIYRQPNCDDPE  | Negative |
| P02765 | GCHSAPHGPGLIYRQPNCDD  | Negative |
| P02765 | AQLWGCHSAPHGPGLIYRQP  | Negative |
| P02765 | GLIYRQPNCDDPETEEAALV  | Negative |
| P02765 | KSLVLLLCLAQLWGCHSAPH  | Negative |
| P02765 | QPNCDDPETEEAALVAIDYI  | Negative |
| P02765 | YRQPNCDDPETEEAALVAID  | Negative |
| P02765 | WGCHSAPHGPGLIYRQPNCD  | Negative |
| P02765 | LLLCLAQLWGCHSAPHGPGL  | Negative |
| P02765 | RQPNCDDPETEEAALVAIDY  | Negative |
| P02766 | CLAGLVFVSEAGPTGTGESK  | Negative |
| P02766 | LLCLAGLVFVSEAGPTGTGE  | Negative |
| P02766 | HRLLLLCLAGLVFVSEAGPT  | Negative |
| P02766 | VSEAGPTGTGESKCPLMVKV  | Negative |
| P02766 | TGESKCPLMVKVLDVAVRGSP | Negative |
| P02766 | RLLLLCLAGLVFVSEAGPTG  | Negative |
| P02766 | LCLAGLVFVSEAGPTGTGES  | Negative |
| P02766 | ESKCPLMVKVLDVAVRGSPAI | Negative |
| P02766 | LVFVSEAGPTGTGESKCPLM  | Negative |
| P02766 | TGTGESKCPLMVKVLDVAVRG | Negative |
| P02766 | AGPTGTGESKCPLMVKVLDA  | Negative |
| P02766 | LAGLVFVSEAGPTGTGESKC  | Negative |
| P02766 | KCPLMVKVLDVAVRGSPAINV | Negative |
| P02766 | SEAGPTGTGESKCPLMVKVL  | Negative |
| P02766 | CPLMVKVLDVAVRGSPAINVA | Negative |
| P02766 | GPTGTGESKCPLMVKVLDVAV | Negative |
| P02766 | GTGESKCPLMVKVLDVAVRGS | Negative |
| P02766 | FVSEAGPTGTGESKCPLMVK  | Negative |
| P02766 | LLLCLAGLVFVSEAGPTGTG  | Negative |
| P02766 | SHRLLLLCLAGLVFVSEAGP  | Negative |
| P02766 | ASHRLLLLCLAGLVFVSEAG  | Negative |
| P02766 | VFVSEAGPTGTGESKCPLMV  | Negative |
| P02766 | SKCPLMVKVLDVAVRGSPAIN | Negative |
| P02766 | GLVFVSEAGPTGTGESKCPL  | Negative |
| P02766 | PTGTGESKCPLMVKVLDVAVR | Negative |
| P02766 | GESKCPLMVKVLDVAVRGSPA | Negative |
| P02766 | MASHRLLLLCLAGLVFVSEA  | Negative |
| P02766 | AGLVFVSEAGPTGTGESKCP  | Negative |
| P02766 | EAGPTGTGESKCPLMVKVLD  | Negative |
| P02767 | CLAGLIFASEAGPGGAGESK  | Negative |
| P02767 | GAGESKCPLMVKVLDVAVRGS | Negative |
| P02767 | LAGLIFASEAGPGGAGESKC  | Negative |

|        |                       |          |
|--------|-----------------------|----------|
| P02767 | GLIFASEAGPGGAGESKCPL  | Negative |
| P02767 | KCPLMVKVLDVAVRGSPAVDV | Negative |
| P02767 | LLCLAGLIFASEAGPGGAGE  | Negative |
| P02767 | EAGPGGAGESKCPLMVKVLD  | Negative |
| P02767 | ESKCPLMVKVLDVAVRGSPAV | Negative |
| P02767 | AGLIFASEAGPGGAGESKCP  | Negative |
| P02767 | PGGAGESKCPLMVKVLDVAVR | Negative |
| P02767 | CPLMVKVLDVAVRGSPAVDVA | Negative |
| P02767 | RLFLLCLAGLIFASEAGPGG  | Negative |
| P02767 | FLLCLAGLIFASEAGPGGAG  | Negative |
| P02767 | SLRLFLLCLAGLIFASEAGP  | Negative |
| P02767 | FASEAGPGGAGESKCPLMVK  | Negative |
| P02767 | LCLAGLIFASEAGPGGAGES  | Negative |
| P02767 | GPGGAGESKCPLMVKVLDVAV | Negative |
| P02767 | AGPGGAGESKCPLMVKVLDVA | Negative |
| P02767 | GGAGESKCPLMVKVLDVAVRG | Negative |
| P02767 | AGESKCPLMVKVLDVAVRGSP | Negative |
| P02767 | LRLFLLCLAGLIFASEAGPG  | Negative |
| P02767 | MASLRLFLLCLAGLIFASEA  | Negative |
| P02767 | IFASEAGPGGAGESKCPLMV  | Negative |
| P02767 | LIFASEAGPGGAGESKCPLM  | Negative |
| P02767 | ASLRLFLLCLAGLIFASEAG  | Negative |
| P02767 | ASEAGPGGAGESKCPLMVKV  | Negative |
| P02767 | SKCPLMVKVLDVAVRGSPAVD | Negative |
| P02767 | GESKCPLMVKVLDVAVRGSPA | Negative |
| P02767 | SEAGPGGAGESKCPLMVKVL  | Negative |
| P02769 | LLFSSAYSRGVFRRDTHKSE  | Negative |
| P02769 | LLLFSSAYSRGVFRRDTHKS  | Negative |
| P02769 | WVTFISLLLLFSSAYSRGVF  | Negative |
| P02769 | KSEIAHRFKDLGEEHFKGLV  | Negative |
| P02769 | KWVTFISLLLLFSSAYSRGV  | Negative |
| P02769 | RGVFRRDTHKSEIAHRFKDL  | Negative |
| P02769 | SSAYSRGVFRRDTHKSEIAH  | Negative |
| P02769 | LFSSAYSRGVFRRDTHKSEI  | Negative |
| P02769 | DTHKSEIAHRFKDLGEEHFK  | Negative |
| P02769 | VFRRDTHKSEIAHRFKDLGE  | Negative |
| P02769 | ISLLLLFSSAYSRGVFRRDT  | Negative |
| P02769 | SAYSRGVFRRDTHKSEIAHR  | Negative |
| P02769 | FISLLLLFSSAYSRGVFRRD  | Negative |
| P02769 | SRGVFRRDTHKSEIAHRFKD  | Negative |
| P02769 | FRRDTHKSEIAHRFKDLGEE  | Negative |
| P02769 | HKSEIAHRFKDLGEEHFKGL  | Negative |
| P02769 | SLLLLFSSAYSRGVFRRDTH  | Negative |
| P02769 | AYSRGVFRRDTHKSEIAHRF  | Negative |
| P02769 | THKSEIAHRFKDLGEEHFKG  | Negative |
| P02769 | LLLLFSSAYSRGVFRRDTHK  | Negative |

|        |                       |          |
|--------|-----------------------|----------|
| P02769 | EIAHRFKDLGEEHFKGLVLI  | Negative |
| P02769 | YSRGVFRRDTHKSEIAHRFK  | Negative |
| P02769 | FSSAYSRGVFRRDTHKSEIA  | Negative |
| P02769 | GVFRRDTHKSEIAHRFKDLG  | Negative |
| P02769 | SEIAHRFKDLGEEHFKGLVL  | Negative |
| P02769 | MKWVTFISLLLLFSSAYSRG  | Negative |
| P02769 | RRDTHKSEIAHRFKDLGEEH  | Negative |
| P02769 | TFISLLLLFSSAYSRGVFRR  | Negative |
| P02769 | RDTHKSEIAHRFKDLGEEHF  | Negative |
| P02770 | FISGSAFSRGVFRREAHKSE  | Negative |
| P02770 | REAHKSEIAHRFKDLGEQHF  | Negative |
| P02770 | WVTFLLLLLFISGSAFSRGVF | Negative |
| P02770 | FSRGVFRREAHKSEIAHRFK  | Negative |
| P02770 | RREAHKSEIAHRFKDLGEQH  | Negative |
| P02770 | LFISGSAFSRGVFRREAHKS  | Negative |
| P02770 | LLLLFISGSAFSRGVFRREA  | Negative |
| P02770 | SAFSRGVFRREAHKSEIAHR  | Negative |
| P02770 | ISGSAFSRGVFRREAHKSEI  | Negative |
| P02770 | AHKSEIAHRFKDLGEQHFKG  | Negative |
| P02770 | LLLFISGSAFSRGVFRREAH  | Negative |
| P02770 | VFRREAHKSEIAHRFKDLGE  | Negative |
| P02770 | FLLLLLFISGSAFSRGVFRRE | Negative |
| P02770 | KWVTFLLLLLFISGSAFSRGV | Negative |
| P02770 | FRREAHKSEIAHRFKDLGEQ  | Negative |
| P02770 | SEIAHRFKDLGEQHFKGLVL  | Negative |
| P02770 | AFSRGVFRREAHKSEIAHRF  | Negative |
| P02770 | SRGVFRREAHKSEIAHRFKD  | Negative |
| P02770 | MKWVTFLLLLFISGSAFSRG  | Negative |
| P02770 | KSEIAHRFKDLGEQHFKGLV  | Negative |
| P02770 | TFLLLLLFISGSAFSRGVFRR | Negative |
| P02770 | GVFRREAHKSEIAHRFKDLG  | Negative |
| P02770 | SGSAFSRGVFRREAHKSEIA  | Negative |
| P02770 | RGVFRREAHKSEIAHRFKDL  | Negative |
| P02770 | LLFISGSAFSRGVFRREAHK  | Negative |
| P02770 | EIAHRFKDLGEQHFKGLVLI  | Negative |
| P02770 | GSAFSRGVFRREAHKSEIAH  | Negative |
| P02770 | EAHKSEIAHRFKDLGEQHFK  | Negative |
| P02770 | HKSEIAHRFKDLGEQHFKGL  | Negative |
| P02771 | LIFLLNFTESRTLHRNEYGI  | Negative |
| P02771 | ESIFLIFLLNFTESRTLHRN  | Negative |
| P02771 | EYGIASILDSYQCTAEISLA  | Negative |
| P02771 | GIASILDSYQCTAEISLADL  | Negative |
| P02771 | NEYGIASILDSYQCTAEISL  | Negative |
| P02771 | IFLLNFTESRTLHRNEYGIA  | Negative |
| P02771 | LLNFTESRTLHRNEYGIASI  | Negative |
| P02771 | TLHRNEYGIASILDSYQCTA  | Negative |

|        |                      |          |
|--------|----------------------|----------|
| P02771 | LNFTESRTLHRNEYGIASIL | Negative |
| P02771 | FTESRTLHRNEYGIASILDS | Negative |
| P02771 | TESRTLHRNEYGIASILDSY | Negative |
| P02771 | SIFLIFLLNFTESRTLHRNE | Negative |
| P02771 | ASILDSYQCTAEISLADLAT | Negative |
| P02771 | LHRNEYGIASILDSYQCTAE | Negative |
| P02771 | WVESIFLIFLLNFTESRTLH | Negative |
| P02771 | IFLIFLLNFTESRTLHRNEY | Negative |
| P02771 | RTLHRNEYGIASILDSYQCT | Negative |
| P02771 | MKWVESIFLIFLLNFTESRT | Negative |
| P02771 | FLIFLLNFTESRTLHRNEYG | Negative |
| P02771 | SRTLHRNEYGIASILDSYQC | Negative |
| P02771 | YGIASILDSYQCTAEISLAD | Negative |
| P02771 | ESRTLHRNEYGIASILDSYQ | Negative |
| P02771 | NFTESRTLHRNEYGIASILD | Negative |
| P02771 | FLLNFTESRTLHRNEYGIAS | Negative |
| P02771 | IASILDSYQCTAEISLADLA | Negative |
| P02771 | SILDSYQCTAEISLADLATI | Negative |
| P02771 | HRNEYGIASILDSYQCTAEI | Negative |
| P02771 | KWVESIFLIFLLNFTESRTL | Negative |
| P02771 | RNEYGIASILDSYQCTAEIS | Negative |
| P02774 | AVAFGHALERGRDYEKNKVC | Negative |
| P02774 | LVLLLAFAFGHALERGRDYE | Negative |
| P02774 | DYEKNKVCKEFSHLGKEDFT | Negative |
| P02774 | GHALERGRDYEKNKVCKEFS | Negative |
| P02774 | NKVCKEFSHLGKEDFTSLSL | Negative |
| P02774 | MKRVLVLLLAFAFGHALERG | Negative |
| P02774 | KNKVCKEFSHLGKEDFTSL  | Negative |
| P02774 | VLLLAFAFGHALERGRDYEK | Negative |
| P02774 | RVLVLLLAFAFGHALERGRD | Negative |
| P02774 | KVCKEFSHLGKEDFTSLSLV | Negative |
| P02774 | RDYEKNKVCKEFSHLGKEDF | Negative |
| P02774 | ERGRDYEKNKVCKEFSHLGK | Negative |
| P02774 | VAFGHALERGRDYEKNKVCK | Negative |
| P02774 | VLVLLLAFAFGHALERGRDY | Negative |
| P02774 | LLAFAFGHALERGRDYEKNK | Negative |
| P02774 | CKEFSHLGKEDFTSLSLVLY | Negative |
| P02774 | GRDYEKNKVCKEFSHLGKED | Negative |
| P02774 | LAVAFGHALERGRDYEKNKV | Negative |
| P02774 | FGHALERGRDYEKNKVCKEF | Negative |
| P02774 | LERGRDYEKNKVCKEFSHLG | Negative |
| P02774 | VCKEFSHLGKEDFTSLSLVL | Negative |
| P02774 | AFGHALERGRDYEKNKVCKE | Negative |
| P02774 | YEKNKVCKEFSHLGKEDFTS | Negative |
| P02774 | LLLAFAFGHALERGRDYEKN | Negative |
| P02774 | EKNKVCKEFSHLGKEDFTSL | Negative |

|        |                      |          |
|--------|----------------------|----------|
| P02774 | ALERGRDYEKNKVCKEFSHL | Negative |
| P02774 | HALERGRDYEKNKVCKEFSH | Negative |
| P02774 | RGRDYEKNKVCKEFSHLGKE | Negative |
| P02774 | KEFSHLGKEDFTSLSLVLYS | Negative |
| P02775 | TTPSCNSARPLHALQVLLLL | Negative |
| P02775 | NSARPLHALQVLLLLSLLLT | Negative |
| P02775 | RLDTTPSCNSARPLHALQVL | Negative |
| P02775 | CNSARPLHALQVLLLLSLLL | Negative |
| P02775 | LLTALASSTKGQTKRNLAKG | Negative |
| P02775 | ARPLHALQVLLLLSLLLTAL | Negative |
| P02775 | VLLLLSLLLTALASSTKGQT | Negative |
| P02775 | SCNSARPLHALQVLLLLSLL | Negative |
| P02775 | LRLDTTPSCNSARPLHALQV | Negative |
| P02775 | LDTTPSCNSARPLHALQVLL | Negative |
| P02775 | LLLLSLLLTALASSTKGQTK | Negative |
| P02775 | RPLHALQVLLLLSLLLTALA | Negative |
| P02775 | MSLRLDTTPSCNSARPLHAL | Negative |
| P02775 | SLLLTALASSTKGQTKRNLA | Negative |
| P02775 | PSCNSARPLHALQVLLLLSL | Negative |
| P02775 | TPSCNSARPLHALQVLLLLS | Negative |
| P02775 | LLSLLLTALASSTKGQTKRN | Negative |
| P02775 | LSLLLTALASSTKGQTKRNL | Negative |
| P02775 | PLHALQVLLLLSLLLTALAS | Negative |
| P02775 | HALQVLLLLSLLLTALASST | Negative |
| P02775 | DTTPSCNSARPLHALQVLLL | Negative |
| P02775 | LTALASSTKGQTKRNLAKGK | Negative |
| P02775 | LHALQVLLLLSLLLTALASS | Negative |
| P02775 | LLLTALASSTKGQTKRNLAK | Negative |
| P02775 | LLSLLLTALASSTKGQTKR  | Negative |
| P02775 | SARPLHALQVLLLLSLLLTA | Negative |
| P02775 | SLRLDTTPSCNSARPLHALQ | Negative |
| P02775 | QVLLLLSLLLTALASSTKGQ | Negative |
| P02775 | ALQVLLLLSLLLTALASSTK | Negative |
| P02776 | AAGFCASRPGLLFLGLLLLP | Negative |
| P02776 | SRPGLLFLGLLLLPLVVAF  | Negative |
| P02776 | AGFCASRPGLLFLGLLLLPL | Negative |
| P02776 | MSSAAGFCASRPGLLFLGLL | Negative |
| P02776 | LLPLVVAFASAEAEEDGDLQ | Negative |
| P02776 | FLGLLLLPLVVAFASAEAE  | Negative |
| P02776 | ASAEAEEDGDLQCLCVKTTS | Negative |
| P02776 | CASRPGLLFLGLLLLPLVVA | Negative |
| P02776 | GLLLLPLVVAFASAEAEEDG | Negative |
| P02776 | LFLGLLLLPLVVAFASAEAE | Negative |
| P02776 | SSAAGFCASRPGLLFLGLLL | Negative |
| P02776 | PLVVAFASAEAEEDGDLQCL | Negative |
| P02776 | PGLLFLGLLLLPLVVAFASA | Negative |



|        |                      |          |
|--------|----------------------|----------|
| P02776 | FASAEAEEDGDLQCLCVKTT | Negative |
| P02776 | GFCASRPGLLFLGLLLLPLV | Negative |
| P02776 | RPGLLFLGLLLLPLVVAFAS | Negative |
| P02776 | ASRPGLLFLGLLLLPLVVAF | Negative |
| P02776 | LLLLPLVVAFASAEAEEDGD | Negative |
| P02776 | AFASAEAEEDGDLQCLCVKT | Negative |
| P02776 | LPLVVAFASAEAEEDGDLQC | Negative |
| P02776 | LVVAFASAEAEEDGDLQCLC | Negative |
| P02776 | FCASRPGLLFLGLLLLPLVV | Negative |
| P02776 | LLFLGLLLLPLVVAFASAEA | Negative |
| P02776 | VAFASAEAEEDGDLQCLCVK | Negative |
| P02776 | VVAFASAEAEEDGDLQCLCV | Negative |
| P02776 | SAEAEEDGDLQCLCVKTTSQ | Negative |
| P02776 | SAAGFCASRPGLLFLGLLLL | Negative |
| P02776 | GLLFLGLLLLPLVVAFASAE | Negative |
| P02776 | LLLPLVVAFASAEAEEDGDL | Negative |
| P02778 | CCLIFLTLSGIQGVPLSRTV | Negative |
| P02778 | VRCTCISISNQPVNPRSLEK | Negative |
| P02778 | GIQGVPLSRTVRCTCISISN | Negative |
| P02778 | ILICCLIFLTLSGIQGVPLS | Negative |
| P02778 | FLTLSGIQGVPLSRTVRCTC | Negative |
| P02778 | CTCISISNQPVNPRSLEKLE | Negative |
| P02778 | QGVPLSRTVRCTCISISNQP | Negative |
| P02778 | TVRCTCISISNQPVNPRSLE | Negative |
| P02778 | TAILICCLIFLTLSGIQGV  | Negative |
| P02778 | LIFLTLSGIQGVPLSRTVRC | Negative |
| P02778 | IFLTLSGIQGVPLSRTVRCT | Negative |
| P02778 | IQGVPLSRTVRCTCISISNQ | Negative |
| P02778 | ICCLIFLTLSGIQGVPLSRT | Negative |
| P02778 | NQTAILICCLIFLTLSGIQG | Negative |
| P02778 | QTAILICCLIFLTLSGIQGV | Negative |
| P02778 | VPLSRTVRCTCISISNQPVN | Negative |
| P02778 | LSGIQGVPLSRTVRCTCISI | Negative |
| P02778 | SGIQGVPLSRTVRCTCISIS | Negative |
| P02778 | TLSGIQGVPLSRTVRCTCIS | Negative |
| P02778 | LTLSGIQGVPLSRTVRCTCI | Negative |
| P02778 | AILICCLIFLTLSGIQGVPL | Negative |
| P02778 | SRTVRCTCISISNQPVNPRS | Negative |
| P02778 | GVPLSRTVRCTCISISNQPV | Negative |
| P02778 | RTVRCTCISISNQPVNPRSL | Negative |
| P02778 | MNQTAILICCLIFLTLSGIQ | Negative |
| P02778 | PLSRTVRCTCISISNQPVNP | Negative |
| P02778 | LSRTVRCTCISISNQPVNPR | Negative |
| P02778 | RCTCISISNQPVNPRSLEKL | Negative |
| P02778 | CLIFLTLSGIQGVPLSRTVR | Negative |
| P02779 | GICPRFAHVIENTLLGTPSS | Negative |

|        |                       |          |
|--------|-----------------------|----------|
| P02779 | PASAGICPRFAHVIENTLLG  | Negative |
| P02779 | SPASAGICPRFAHVIENTLL  | Negative |
| P02779 | VIENTLLGTPSSYETSLKEF  | Negative |
| P02779 | ALLCSPASAGICPRFAHVIE  | Negative |
| P02779 | ASAGICPRFAHVIENTLLGT  | Negative |
| P02779 | AITLALVTLALLCSPASAGI  | Negative |
| P02779 | SAGICPRFAHVIENTLLGTP  | Negative |
| P02779 | MKLAITLALVTLALLCSPAS  | Negative |
| P02779 | KLAITLALVTLALLCSPASA  | Negative |
| P02779 | LVTLALLCSPASAGICPRFA  | Negative |
| P02779 | HVIENTLLGTPSSYETSLKE  | Negative |
| P02779 | ICPRFAHVIENTLLGTPSSY  | Negative |
| P02779 | LAITLALVTLALLCSPASAG  | Negative |
| P02779 | AHVIENTLLGTPSSYETSLK  | Negative |
| P02779 | FAHVIENTLLGTPSSYETSL  | Negative |
| P02779 | RFAHVIENTLLGTPSSYETS  | Negative |
| P02779 | LCSPASAGICPRFAHVIENTL | Negative |
| P02779 | CSPASAGICPRFAHVIENTLL | Negative |
| P02779 | VTLALLCSPASAGICPRFAH  | Negative |
| P02779 | LLCSPASAGICPRFAHVIENT | Negative |
| P02779 | ITLALVTLALLCSPASAGIC  | Negative |
| P02779 | TLALVTLALLCSPASAGICP  | Negative |
| P02779 | CPRFAHVIENTLLGTPSSYE  | Negative |
| P02779 | AGICPRFAHVIENTLLGTPS  | Negative |
| P02779 | TLALLCSPASAGICPRFAHV  | Negative |
| P02779 | LALLCSPASAGICPRFAHVI  | Negative |
| P02779 | ALVTLALLCSPASAGICPRF  | Negative |
| P02779 | PRFAHVIENTLLGTPSSYET  | Negative |
| P02780 | CSILDEVIRGTINSTVTLHD  | Negative |
| P02780 | VTIPICCYASGSGCSILDEV  | Negative |
| P02780 | LFLVVTIPICCYASGSGCSI  | Negative |
| P02780 | YASGSGCSILDEVIRGTINS  | Negative |
| P02780 | LDEVIRGTINSTVTLHDYMK  | Negative |
| P02780 | SILDEVIRGTINSTVTLHDY  | Negative |
| P02780 | IRGTINSTVTLHDYMKLVKP  | Negative |
| P02780 | FLLVTIPICCYASGSGCSIL  | Negative |
| P02780 | EVIRGTINSTVTLHDYMKLV  | Negative |
| P02780 | FLFLLVTIPICCYASGSGCS  | Negative |
| P02780 | CYASGSGCSILDEVIRGTIN  | Negative |
| P02780 | ASGSGCSILDEVIRGTINST  | Negative |
| P02780 | PICCYASGSGCSILDEVIRG  | Negative |
| P02780 | SGCSILDEVIRGTINSTVTL  | Negative |
| P02780 | LVFLFLLVTIPICCYASGSG  | Negative |
| P02780 | LVVTIPICCYASGSGCSILDE | Negative |
| P02780 | MKLVFLFLLVTIPICCYASG  | Negative |
| P02780 | IPICCYASGSGCSILDEVIR  | Negative |

|        |                      |          |
|--------|----------------------|----------|
| P02780 | CCYASGSGCSILDEVIRGTI | Negative |
| P02780 | GCSILDEVIRGTINSTVTLH | Negative |
| P02780 | TIPICCYASGSGCSILDEVI | Negative |
| P02780 | DEVIRGTINSTVTLHDYMKL | Negative |
| P02780 | KLVFLFLLVTIPICCYASGS | Negative |
| P02780 | GSGCSILDEVIRGTINSTVT | Negative |
| P02780 | ILDEVIRGTINSTVTLHDYM | Negative |
| P02780 | SGSGCSILDEVIRGTINSTV | Negative |
| P02780 | LLVTIPICCYASGSGCSILD | Negative |
| P02780 | VIRGTINSTVTLHDYMKLVK | Negative |
| P02780 | ICCYASGSGCSILDEVIRGT | Negative |
| P02781 | RLSLCLLTILVVCCYEANGQ | Negative |
| P02781 | LCLLTILVVCCYEANGQTLA | Negative |
| P02781 | NGQTLAGQVCQALQDVTITF | Negative |
| P02781 | LTILVVCCYEANGQTLAGQV | Negative |
| P02781 | TLAGQVCQALQDVTITFLLN | Negative |
| P02781 | CYEANGQTLAGQVCQALQDV | Negative |
| P02781 | VCCYEANGQTLAGQVCQALQ | Negative |
| P02781 | VCQALQDVTITFLLNPEEEL | Negative |
| P02781 | VVCCYEANGQTLAGQVCQAL | Negative |
| P02781 | GQTLAGQVCQALQDVTITFL | Negative |
| P02781 | LLTILVVCCYEANGQTLAGQ | Negative |
| P02781 | ANGQTLAGQVCQALQDVTIT | Negative |
| P02781 | LVVCCYEANGQTLAGQVCQA | Negative |
| P02781 | TILVVCCYEANGQTLAGQVC | Negative |
| P02781 | EANGQTLAGQVCQALQDVTI | Negative |
| P02781 | SLCLLTILVVCCYEANGQTL | Negative |
| P02781 | QVCQALQDVTITFLLNPEEE | Negative |
| P02781 | AGQVCQALQDVTITFLLNPE | Negative |
| P02781 | LSLCLLTILVVCCYEANGQT | Negative |
| P02781 | CCYEANGQTLAGQVCQALQD | Negative |
| P02781 | YEANGQTLAGQVCQALQDVT | Negative |
| P02781 | ALQDVTITFLLNPEEELKRE | Negative |
| P02781 | QALQDVTITFLLNPEEELKR | Negative |
| P02781 | QTLAGQVCQALQDVTITFLL | Negative |
| P02781 | MRLSLCLLTILVVCCYEANG | Negative |
| P02781 | GQVCQALQDVTITFLLNPEE | Negative |
| P02781 | CQALQDVTITFLLNPEEELK | Negative |
| P02781 | ILVVCCYEANGQTLAGQVCQ | Negative |
| P02781 | LAGQVCQALQDVTITFLLNP | Negative |
| P02782 | EANASQICELVAHETISFLM | Negative |
| P02782 | ELVAHETISFLMKSEEELKK | Negative |
| P02782 | YEANASQICELVAHETISFL | Negative |
| P02782 | NASQICELVAHETISFLMKS | Negative |
| P02782 | VAHETISFLMKSEEELKKEL | Negative |
| P02782 | LAVCCYEANASQICELVAHE | Negative |

|        |                      |          |
|--------|----------------------|----------|
| P02782 | LIMLAVCCYEANASQICELV | Negative |
| P02782 | IMLAVCCYEANASQICELVA | Negative |
| P02782 | LSLCLLIMLAVCCYEANASQ | Negative |
| P02782 | CCYEANASQICELVAHETIS | Negative |
| P02782 | MLAVCCYEANASQICELVAH | Negative |
| P02782 | CYEANASQICELVAHETISF | Negative |
| P02782 | MSTIKLSLCLLIMLAVCCYE | Negative |
| P02782 | ICELVAHETISFLMKSEEEL | Negative |
| P02782 | STIKLSLCLLIMLAVCCYEA | Negative |
| P02782 | SLCLLIMLAVCCYEANASQI | Negative |
| P02782 | TIKLSLCLLIMLAVCCYEAN | Negative |
| P02782 | LLIMLAVCCYEANASQICEL | Negative |
| P02782 | IKLSLCLLIMLAVCCYEANA | Negative |
| P02782 | LCLLIMLAVCCYEANASQIC | Negative |
| P02782 | LVAHETISFLMKSEEELKKE | Negative |
| P02782 | VCCYEANASQICELVAHETI | Negative |
| P02782 | SQICELVAHETISFLMKSEE | Negative |
| P02782 | CELVAHETISFLMKSEEELK | Negative |
| P02782 | AVCCYEANASQICELVAHET | Negative |
| P02782 | QICELVAHETISFLMKSEEE | Negative |
| P02782 | KLSLCLLIMLAVCCYEANAS | Negative |
| P02782 | ASQICELVAHETISFLMKSE | Negative |
| P02782 | ANASQICELVAHETISFLMK | Negative |
| P02783 | CSLLLLVTGAIGRKTKEYY  | Negative |
| P02783 | IGRKTKEYYSQSEEVVSESF | Negative |
| P02783 | KSTSLFLCSLLLLVTGAIG  | Negative |
| P02783 | KTKEYYSQSEEVVSESFASG | Negative |
| P02783 | EKYSQSEEVVSESFASGPSS | Negative |
| P02783 | TKEYYSQSEEVVSESFASGP | Negative |
| P02783 | MKSTSLFLCSLLLLVTGAI  | Negative |
| P02783 | GAIGRKTKEYYSQSEEVVSE | Negative |
| P02783 | KEKYSQSEEVVSESFASGPS | Negative |
| P02783 | SLFLCSLLLLVTGAIGRKT  | Negative |
| P02783 | AIGRKTKEYYSQSEEVVSES | Negative |
| P02783 | LLVTGAIGRKTKEYYSQSEE | Negative |
| P02783 | LCSLLLLVTGAIGRKTKEK  | Negative |
| P02783 | QSEEVVSESFASGPSSGSSD | Negative |
| P02783 | VTGAIGRKTKEYYSQSEEVV | Negative |
| P02783 | TSLFLCSLLLLVTGAIGRK  | Negative |
| P02783 | SQSEEVVSESFASGPSSGSS | Negative |
| P02783 | SLLLLVTGAIGRKTKEYYS  | Negative |
| P02783 | YSQSEEVVSESFASGPSSGS | Negative |
| P02783 | TGAIGRKTKEYYSQSEEVVS | Negative |
| P02783 | RKTKEYYSQSEEVVSESFAS | Negative |
| P02783 | LLLLVTGAIGRKTKEYYSQS | Negative |
| P02783 | LLVTGAIGRKTKEYYSQSE  | Negative |

|        |                        |          |
|--------|------------------------|----------|
| P02783 | LFLCSLLLLLVGTGAIGRKTK  | Negative |
| P02783 | GRKTKEKYSQSEEVVSESFA   | Negative |
| P02783 | KYSQSEEVVSESFASGPSSG   | Negative |
| P02783 | LVTGAIGRKTKKEKYSQSEEV  | Negative |
| P02783 | STSLFLCSLLLLLVGTGAIGR  | Negative |
| P02783 | LLLLLVGTGAIGRKTKKEKYSQ | Negative |
| P02784 | AGVSVFLQLDPVNGDQDEGV   | Negative |
| P02784 | NGDQDEGVSTEPTQDGPAEL   | Negative |
| P02784 | QLGLFLIWAGVSVFLQLDPV   | Negative |
| P02784 | VSVFLQLDPVNGDQDEGVST   | Negative |
| P02784 | GLFLIWAGVSVFLQLDPVNG   | Negative |
| P02784 | LQLDPVNGDQDEGVSTEPTQ   | Negative |
| P02784 | LQLGLFLIWAGVSVFLQLDP   | Negative |
| P02784 | EGVSTEPTQDGPAELPEDEE   | Negative |
| P02784 | LFLIWAGVSVFLQLDPVNGD   | Negative |
| P02784 | FLQLDPVNGDQDEGVSTEPT   | Negative |
| P02784 | PVNGDQDEGVSTEPTQDGPA   | Negative |
| P02784 | DQDEGVSTEPTQDGPAELPE   | Negative |
| P02784 | IWAGVSVFLQLDPVNGDQDE   | Negative |
| P02784 | GVSFVLQLDPVNGDQDEGVS   | Negative |
| P02784 | LIWAGVSVFLQLDPVNGDQD   | Negative |
| P02784 | QLDPVNGDQDEGVSTEPTQD   | Negative |
| P02784 | GVSTEPTQDGPAELPEDEEC   | Negative |
| P02784 | GDQDEGVSTEPTQDGPAELP   | Negative |
| P02784 | LDPVNGDQDEGVSTEPTQDG   | Negative |
| P02784 | FLIWAGVSVFLQLDPVNGDQ   | Negative |
| P02784 | ALQLGLFLIWAGVSVFLQLD   | Negative |
| P02784 | DPVNGDQDEGVSTEPTQDGP   | Negative |
| P02784 | QDEGVSTEPTQDGPAELPED   | Negative |
| P02784 | SVFLQLDPVNGDQDEGVSTE   | Negative |
| P02784 | LGLFLIWAGVSVFLQLDPVN   | Negative |
| P02784 | VNGDQDEGVSTEPTQDGPAE   | Negative |
| P02784 | DEGVSTEPTQDGPAELPEDE   | Negative |
| P02784 | MALQLGLFLIWAGVSVFLQL   | Negative |
| P02784 | VFLQLDPVNGDQDEGVSTEP   | Negative |
| P02787 | PDKTVRWCAVSEHEATKCQS   | Negative |
| P02787 | CAVSEHEATKCQSFRDHMKS   | Negative |
| P02787 | AVSEHEATKCQSFRDHMKSV   | Negative |
| P02787 | AVPDKTVRWCAVSEHEATKC   | Negative |
| P02787 | VSEHEATKCQSFRDHMKSVI   | Negative |
| P02787 | VLGLCLAVPDKTVRWCAVSE   | Negative |
| P02787 | LVCAVLGLCLAVPDKTVRWC   | Negative |
| P02787 | CAVLGLCLAVPDKTVRWCAV   | Negative |
| P02787 | LLVCAVLGLCLAVPDKTVRW   | Negative |
| P02787 | AVLGLCLAVPDKTVRWCAVS   | Negative |
| P02787 | CLAVPDKTVRWCAVSEHEAT   | Negative |

|        |                      |          |
|--------|----------------------|----------|
| P02787 | VRWCAVSEHEATKCQSFRDH | Negative |
| P02787 | VPDKTVRWCAVSEHEATKCQ | Negative |
| P02787 | LCLAVPDKTVRWCAVSEHEA | Negative |
| P02787 | GLCLAVPDKTVRWCAVSEHE | Negative |
| P02787 | GALLVCAVLGLCLAVPDKTV | Negative |
| P02787 | TVRWCAVSEHEATKCQSFRD | Negative |
| P02787 | WCAVSEHEATKCQSFRDHMK | Negative |
| P02787 | AVGALLVCAVLGLCLAVPDK | Negative |
| P02787 | RLAVGALLVCAVLGLCLAVP | Negative |
| P02787 | ALLVCAVLGLCLAVPDKTVR | Negative |
| P02787 | RWCAVSEHEATKCQSFRDHM | Negative |
| P02787 | KTVRWCAVSEHEATKCQSFR | Negative |
| P02787 | DKTVRWCAVSEHEATKCQSF | Negative |
| P02787 | MRLAVGALLVCAVLGLCLAV | Negative |
| P02787 | LAVPDKTVRWCAVSEHEATK | Negative |
| P02787 | VCAVLGLCLAVPDKTVRWCA | Negative |
| P02787 | LAVGALLVCAVLGLCLAVPD | Negative |
| P02787 | LGLCLAVPDKTVRWCAVSEH | Negative |
| P02788 | VLLFLGALGLCLAGRRRSVQ | Negative |
| P02788 | WCAVSQPEATKCFQWQRNMR | Negative |
| P02788 | GLCLAGRRRSVQWCAVSQPE | Negative |
| P02788 | RRRSVQWCAVSQPEATKCFQ | Negative |
| P02788 | LFLGALGLCLAGRRRSVQWC | Negative |
| P02788 | VSQPEATKCFQWQRNMRKVR | Negative |
| P02788 | LVLLFLGALGLCLAGRRRSV | Negative |
| P02788 | AVSQPEATKCFQWQRNMRKV | Negative |
| P02788 | LAGRRRSVQWCAVSQPEATK | Negative |
| P02788 | MKLVFLVLLFLGALGLCLAG | Negative |
| P02788 | AGRRRSVQWCAVSQPEATKC | Negative |
| P02788 | CLAGRRRSVQWCAVSQPEAT | Negative |
| P02788 | GRRRSVQWCAVSQPEATKCF | Negative |
| P02788 | QWCAVSQPEATKCFQWQRNM | Negative |
| P02788 | LGALGLCLAGRRRSVQWCAV | Negative |
| P02788 | KLVFLVLLFLGALGLCLAGR | Negative |
| P02788 | VQWCAVSQPEATKCFQWQRN | Negative |
| P02788 | SVQWCAVSQPEATKCFQWQR | Negative |
| P02788 | FLGALGLCLAGRRRSVQWCA | Negative |
| P02788 | RSVQWCAVSQPEATKCFQWQ | Negative |
| P02788 | LGLCLAGRRRSVQWCAVSQP | Negative |
| P02788 | GALGLCLAGRRRSVQWCAVS | Negative |
| P02788 | CAVSQPEATKCFQWQRNMRK | Negative |
| P02788 | VFLVLLFLGALGLCLAGR   | Negative |
| P02788 | ALGLCLAGRRRSVQWCAVSQ | Negative |
| P02788 | LVFLVLLFLGALGLCLAGR  | Negative |
| P02788 | LCLAGRRRSVQWCAVSQPEA | Negative |
| P02788 | RRSVQWCAVSQPEATKCFQW | Negative |

|        |                      |          |
|--------|----------------------|----------|
| P02788 | LLFLGALGLCLAGRRRSVQW | Negative |
| P02789 | SVIRWCTISSPEEKKCNNLR | Negative |
| P02789 | LSLGIAAVCFAAPPKSVIRW | Negative |
| P02789 | KSVIRWCTISSPEEKKCNNL | Negative |
| P02789 | MKLILCTVLSLGIAAVCFAA | Negative |
| P02789 | VLSLGIAAVCFAAPPKSVIR | Negative |
| P02789 | LGIAAVCFAAPPKSVIRWCT | Negative |
| P02789 | APPKSVIRWCTISSPEEKKC | Negative |
| P02789 | SLGIAAVCFAAPPKSVIRWC | Negative |
| P02789 | CTVLSLGIAAVCFAAPPKSV | Negative |
| P02789 | WCTISSPEEKKCNNLRDLTQ | Negative |
| P02789 | AAPPKSVIRWCTISSPEEKK | Negative |
| P02789 | TVLSLGIAAVCFAAPPKSVI | Negative |
| P02789 | LILCTVLSLGIAAVCFAAPP | Negative |
| P02789 | ILCTVLSLGIAAVCFAAPPK | Negative |
| P02789 | IAAVCFAAPPKSVIRWCTIS | Negative |
| P02789 | VCFAAPPKSVIRWCTISSPE | Negative |
| P02789 | FAAPPKSVIRWCTISSPEEK | Negative |
| P02789 | IRWCTISSPEEKKCNNLRDL | Negative |
| P02789 | PPKSVIRWCTISSPEEKKCN | Negative |
| P02789 | CTISSPEEKKCNNLRDLTQQ | Negative |
| P02789 | RWCTISSPEEKKCNNLRDLT | Negative |
| P02789 | CFAAPPKSVIRWCTISSPEE | Negative |
| P02789 | TISSPEEKKCNNLRDLTQQE | Negative |
| P02789 | KLILCTVLSLGIAAVCFAAP | Negative |
| P02789 | VIRWCTISSPEEKKCNNLRD | Negative |
| P02789 | GIAAVCFAAPPKSVIRWCTI | Negative |
| P02789 | AVCFAAPPKSVIRWCTISSP | Negative |
| P02789 | AAVCFAAPPKSVIRWCTISS | Negative |
| P02789 | PKSVIRWCTISSPEEKKCNN | Negative |
| P02790 | LGLWSLCWSLAIATPLPTS  | Negative |
| P02790 | ALGLWSLCWSLAIATPLPPT | Negative |
| P02790 | LCWSLAIATPLPPTSAHGNV | Negative |
| P02790 | APVALGLWSLCWSLAIATPL | Negative |
| P02790 | VLGAPVALGLWSLCWSLAI  | Negative |
| P02790 | GAPVALGLWSLCWSLAIATP | Negative |
| P02790 | LAIATPLPPTSAHGNVAEGE | Negative |
| P02790 | GLWSLCWSLAIATPLPPTSA | Negative |
| P02790 | MARVLGAPVALGLWSLCWSL | Negative |
| P02790 | PPTSAHGNVAEGETKPDVDV | Negative |
| P02790 | PLPPTSAHGNVAEGETKPDV | Negative |
| P02790 | SLCWSLAIATPLPPTSAHGN | Negative |
| P02790 | PVALGLWSLCWSLAIATPLP | Negative |
| P02790 | ATPLPPTSAHGNVAEGETKP | Negative |
| P02790 | CWSLAIATPLPPTSAHGNVA | Negative |
| P02790 | SAHGNVAEGETKPDVDVTER | Negative |

|        |                      |          |
|--------|----------------------|----------|
| P02790 | WSLAIATPLPPTSAHGNVAE | Negative |
| P02790 | IATPLPPTSAHGNVAEGETK | Negative |
| P02790 | TPLPPTSAHGNVAEGETKPD | Negative |
| P02790 | LPPTSAHGNVAEGETKPPDP | Negative |
| P02790 | LWSLCWSLAIATPLPPTSAH | Negative |
| P02790 | LGAPVALGLWSLCWSLAIAT | Negative |
| P02790 | ARVLGAPVALGLWSLCWSLA | Negative |
| P02790 | SLAIATPLPPTSAHGNVAEG | Negative |
| P02790 | RVLGAPVALGLWSLCWSLAI | Negative |
| P02790 | PTSAHGNVAEGETKPPDPVT | Negative |
| P02790 | TSAHGNVAEGETKPPDPVTE | Negative |
| P02790 | AIATPLPPTSAHGNVAEGET | Negative |
| P02790 | WSLCWSLAIATPLPPTSAHG | Negative |
| P02808 | ALMVSMIGADSSEEKFLRRI | Negative |
| P02808 | IGADSSEEKFLRRIGRFGYG | Negative |
| P02808 | FAFILALMVSMIGADSSEEK | Negative |
| P02808 | SSEEKFLRRIGRFGYGYGPY | Negative |
| P02808 | GADSSEEKFLRRIGRFGYGY | Negative |
| P02808 | AFILALMVSMIGADSSEEKF | Negative |
| P02808 | DSSEEKFLRRIGRFGYGYGP | Negative |
| P02808 | EKFLRRIGRFGYGYGPYQPV | Negative |
| P02808 | MKFLVFAFILALMVSMIGAD | Negative |
| P02808 | FLVFAFILALMVSMIGADSS | Negative |
| P02808 | SMIGADSSEEKFLRRIGRFG | Negative |
| P02808 | FLRRIGRFGYGYGPYQVPE  | Negative |
| P02808 | RRIGRFGYGYGPYQVPEQP  | Negative |
| P02808 | IGRFGYGYGPYQVPEQPLY  | Negative |
| P02808 | VSMIGADSSEEKFLRRIGRF | Negative |
| P02808 | LVFAFILALMVSMIGADSSE | Negative |
| P02808 | LMVSMIGADSSEEKFLRRIG | Negative |
| P02808 | MVSMIGADSSEEKFLRRIGR | Negative |
| P02808 | LRRIGRFGYGYGPYQVPEQ  | Negative |
| P02808 | KFLVFAFILALMVSMIGADS | Negative |
| P02808 | EEKFLRRIGRFGYGYGPYQP | Negative |
| P02808 | KFLRRIGRFGYGYGPYQVP  | Negative |
| P02808 | ADSSEEKFLRRIGRFGYGYG | Negative |
| P02808 | MIGADSSEEKFLRRIGRFGY | Negative |
| P02808 | ILALMVSMIGADSSEEKFLR | Negative |
| P02808 | FILALMVSMIGADSSEEKFL | Negative |
| P02808 | RIGRFGYGYGPYQVPEQPL  | Negative |
| P02808 | LALMVSMIGADSSEEKFLRR | Negative |
| P02808 | SEEKFLRRIGRFGYGYGPYQ | Negative |
| P02810 | AFSSAQDLDEDVSQEDVPLV | Negative |
| P02810 | EDVPLVISDGGDSEQFIDEE | Negative |
| P02810 | LILLSVALLAFSSAQDLDED | Negative |
| P02810 | DVSQEDVPLVISDGGDSEQF | Negative |



|        |                      |          |
|--------|----------------------|----------|
| P02810 | LDEDVSQEDVPLVISDGGDS | Negative |
| P02810 | VSQEDVPLVISDGGDSEQFI | Negative |
| P02810 | DLDEDVSQEDVPLVISDGGD | Negative |
| P02810 | SAQDLDEDVSQEDVPLVISD | Negative |
| P02810 | LLAFSSAQDLDEDVSQEDVP | Negative |
| P02810 | SVALLAFSSAQDLDEDVSQE | Negative |
| P02810 | PLVISDGGDSEQFIDEERQG | Negative |
| P02810 | MLLILLSVALLAFSSAQDL  | Negative |
| P02810 | ILLSVALLAFSSAQDLDEDV | Negative |
| P02810 | DEDVSQEDVPLVISDGGDSE | Negative |
| P02810 | SSAQDLDEDVSQEDVPLVIS | Negative |
| P02810 | LAFSSAQDLDEDVSQEDVPL | Negative |
| P02810 | AQDLDEDVSQEDVPLVISDG | Negative |
| P02810 | VPLVISDGGDSEQFIDEERQ | Negative |
| P02810 | FSSAQDLDEDVSQEDVPLVI | Negative |
| P02810 | EDVSQEDVPLVISDGGDSEQ | Negative |
| P02810 | VALLAFSSAQDLDEDVSQED | Negative |
| P02810 | ALLAFSSAQDLDEDVSQEDV | Negative |
| P02810 | SQEDVPLVISDGGDSEQFID | Negative |
| P02810 | LVISDGGDSEQFIDEERQGP | Negative |
| P02810 | QDLDEDVSQEDVPLVISDGG | Negative |
| P02810 | QEDVPLVISDGGDSEQFIDE | Negative |
| P02810 | DVPLVISDGGDSEQFIDEER | Negative |
| P02810 | LLSVALLAFSSAQDLDEDVS | Negative |
| P02810 | LSVALLAFSSAQDLDEDVSQ | Negative |
| P02814 | ESQRGPRGPYPGPLAPPQP  | Negative |
| P02814 | RGYPGGLAPPQPFPGFV    | Negative |
| P02814 | FTPGESQRGPRGPYPGPLA  | Negative |
| P02814 | LTWILGLWALAACFTPGESQ | Negative |
| P02814 | QRGPRGPYPGGLAPPQFPG  | Negative |
| P02814 | TWILGLWALAACFTPGESQR | Negative |
| P02814 | LAACFTPGESQRGPRGPYP  | Negative |
| P02814 | WALAACFTPGESQRGPRGPY | Negative |
| P02814 | SLTWILGLWALAACFTPGES | Negative |
| P02814 | LWALAACFTPGESQRGPRGP | Negative |
| P02814 | YPPGGLAPPQPFPGFVPPP  | Negative |
| P02814 | GLWALAACFTPGESQRGPRG | Negative |
| P02814 | RGPRGPYPGGLAPPQFPGP  | Negative |
| P02814 | ACFTPGESQRGPRGPYPGPG | Negative |
| P02814 | ALAACFTPGESQRGPRGPYP | Negative |
| P02814 | PGESQRGPRGPYPGGLAPP  | Negative |
| P02814 | GPRGPYPGGLAPPQPFPGP  | Negative |
| P02814 | SQRGPRGPYPGGLAPPQPF  | Negative |
| P02814 | AACFTPGESQRGPRGPYPG  | Negative |
| P02814 | GESQRGPRGPYPGGLAPPQ  | Negative |
| P02814 | ILGLWALAACFTPGESQRGP | Negative |

|        |                       |          |
|--------|-----------------------|----------|
| P02814 | GPYPPGPLAPPQPFPGFVPP  | Negative |
| P02814 | WILGLWALAACFTPGESQRG  | Negative |
| P02814 | CFTPGESQRGPRGPYPPGPL  | Negative |
| P02814 | KSLTWILGLWALAACFTPGE  | Negative |
| P02814 | PYPPGPLAPPQPFPGFVPP   | Negative |
| P02814 | TPGESQRGPRGPYPPGPLAP  | Negative |
| P02814 | MKSLTWILGLWALAACFTPG  | Negative |
| P02814 | PRGPYPPGPLAPPQPFPGGF  | Negative |
| P02817 | WILFACLLGAAFSMPLPPHP  | Negative |
| P02817 | LPPHPGHPGYINFSYEVLTP  | Negative |
| P02817 | HPGHPGYINFSYEVLTPCLKW | Negative |
| P02817 | INFSYEVLTPCLKWYQSMIRH | Negative |
| P02817 | FSMPLPPHPGHPGYINFSYE  | Negative |
| P02817 | PPHPGHPGYINFSYEVLTP   | Negative |
| P02817 | GYINFSYEVLTPCLKWYQSMI | Negative |
| P02817 | TWILFACLLGAAFSMPLPPH  | Negative |
| P02817 | LGAAFSMPLPPHPGHPGYIN  | Negative |
| P02817 | PHPGHPGYINFSYEVLTPCLK | Negative |
| P02817 | AAFSMPLPPHPGHPGYINFS  | Negative |
| P02817 | FACLLGAAFSMPLPPHPGHP  | Negative |
| P02817 | GHPGYINFSYEVLTPCLKWYQ | Negative |
| P02817 | PLPPHPGHPGYINFSYEVLTP | Negative |
| P02817 | ILFACLLGAAFSMPLPPHPG  | Negative |
| P02817 | MPLPPHPGHPGYINFSYEVL  | Negative |
| P02817 | CLLGAAFSMPLPPHPGHPGY  | Negative |
| P02817 | MGTWILFACLLGAAFSMPLP  | Negative |
| P02817 | NFSYEVLTPCLKWYQSMIRHP | Negative |
| P02817 | LLGAAFSMPLPPHPGHPGYI  | Negative |
| P02817 | AFSMPLPPHPGHPGYINFSY  | Negative |
| P02817 | ACLLGAAFSMPLPPHPGHPG  | Negative |
| P02817 | GAAFSMPLPPHPGHPGYINF  | Negative |
| P02817 | YINFSYEVLTPCLKWYQSMIR | Negative |
| P02817 | PGHPGYINFSYEVLTPCLKWY | Negative |
| P02817 | HPGYINFSYEVLTPCLKWYQS | Negative |
| P02817 | PGYINFSYEVLTPCLKWYQSM | Negative |
| P02817 | LFACLLGAAFSMPLPPHPGH  | Negative |
| P02817 | SMPLPPHPGHPGYINFSYEV  | Negative |
| P02866 | SLFLPIFTFITMFLMVVNKV  | Negative |
| P02866 | ITMFLMVVNKVSSSTHETNA  | Negative |
| P02866 | KVSSSTHETNALHFMFNQFS  | Negative |
| P02866 | VVNKVSSSTHETNALHFMFN  | Negative |
| P02866 | SKKSSLFLPIFTFITMFLMV  | Negative |
| P02866 | FTFITMFLMVVNKVSSSTHE  | Negative |
| P02866 | PIFTFITMFLMVVNKVSSST  | Negative |
| P02866 | FLPIFTFITMFLMVVNKVSS  | Negative |
| P02866 | LPIFTFITMFLMVVNKVSSS  | Negative |

|        |                      |          |
|--------|----------------------|----------|
| P02866 | LFLPIFTFITMFLMVVNKVS | Negative |
| P02866 | VSSSTHETNALHFMFNQFSK | Negative |
| P02866 | MAISKKSSLFLPIFTFITMF | Negative |
| P02866 | TMFLMVVNKVSSSTHETNAL | Negative |
| P02866 | SSSTHETNALHFMFNQFSKD | Negative |
| P02866 | ISKKSSLFLPIFTFITMFLM | Negative |
| P02866 | IFTFITMFLMVVNKVSSSTH | Negative |
| P02866 | KSSLFLPIFTFITMFLMVVN | Negative |
| P02866 | NKVSSSTHETNALHFMFNQF | Negative |
| P02866 | MFLMVVNKVSSSTHETNALH | Negative |
| P02866 | MVVNKVSSSTHETNALHFMF | Negative |
| P02866 | AISKKSSLFLPIFTFITMFL | Negative |
| P02866 | SSTHETNALHFMFNQFSKDQ | Negative |
| P02866 | LMVVNKVSSSTHETNALHFM | Negative |
| P02866 | KKSSLFLPIFTFITMFLMVV | Negative |
| P02866 | STHETNALHFMFNQFSKDQK | Negative |
| P02866 | VNKVSSSTHETNALHFMFNQ | Negative |
| P02866 | FITMFLMVVNKVSSSTHETN | Negative |
| P02866 | FLMVVNKVSSSTHETNALHF | Negative |
| P02866 | SSLFLPIFTFITMFLMVVNK | Negative |
| P02870 | MISFYLIFLSILLTTIFFFK | Negative |
| P02870 | LIFLSILLTTIFFFKVNSTE | Negative |
| P02870 | FFFKVNSTETTSFSITKFSP | Negative |
| P02870 | MASLQTQMISFYLIFLSILL | Negative |
| P02870 | KVNSTETTSFSITKFSPDQK | Negative |
| P02870 | STETTSFSITKFSPDQKNLI | Negative |
| P02870 | SILLTTIFFFKVNSTETTSF | Negative |
| P02870 | ASLQTQMISFYLIFLSILLT | Negative |
| P02870 | VNSTETTSFSITKFSPDQKN | Negative |
| P02870 | FLSILLTTIFFFKVNSTETT | Negative |
| P02870 | QMISFYLIFLSILLTTIFFF | Negative |
| P02870 | ISFYLIFLSILLTTIFFFKV | Negative |
| P02870 | TQMISFYLIFLSILLTTIFF | Negative |
| P02870 | FYLIFLSILLTTIFFFKVNS | Negative |
| P02870 | FKVNSTETTSFSITKFSPDQ | Negative |
| P02870 | YLIFLSILLTTIFFFKVNST | Negative |
| P02870 | IFLSILLTTIFFFKVNSTET | Negative |
| P02870 | LTTIFFFKVNSTETTSFSIT | Negative |
| P02870 | LLTTIFFFKVNSTETTSFSI | Negative |
| P02870 | TIFFFKVNSTETTSFSITKF | Negative |
| P02870 | SLQTQMISFYLIFLSILLTT | Negative |
| P02870 | ILLTTIFFFKVNSTETTSFS | Negative |
| P02870 | TTIFFFKVNSTETTSFSITK | Negative |
| P02870 | LQTQMISFYLIFLSILLTTI | Negative |
| P02870 | SFYLIFLSILLTTIFFFKVN | Negative |
| P02870 | NSTETTSFSITKFSPDQKNL | Negative |

|        |                        |          |
|--------|------------------------|----------|
| P02870 | FFKVNSTETTSFSITKFSPD   | Negative |
| P02870 | IFFFKVNSTETTSFSITKFS   | Negative |
| P02870 | QTQMISFYLI FL SILLTTIF | Negative |
| P02872 | CVFLTFFLLLAASSKKVDSA   | Negative |
| P02872 | LTFFLLLAASSKKVDSAETV   | Negative |
| P02872 | SKKVDSAETVSFNFNSFSEG   | Negative |
| P02872 | ASSKKVDSAETVSFNFNSFS   | Negative |
| P02872 | LLAASSKKVDSAETVSFNFN   | Negative |
| P02872 | VFLTFFLLLAASSKKVDSAE   | Negative |
| P02872 | DSAETVSFNFNSFSEGNPAI   | Negative |
| P02872 | ETVSFNFNSFSEGNPAINFQ   | Negative |
| P02872 | LAASSKKVDSAETVSFNFNS   | Negative |
| P02872 | VDSAETVSFNFNSFSEGNPA   | Negative |
| P02872 | PFCVFLTFFLLLAASSKKVD   | Negative |
| P02872 | AASSKKVDSAETVSFNFNSF   | Negative |
| P02872 | MKPFCVFLTFFLLLAASSKK   | Negative |
| P02872 | NFNSFSEGNPAINFQGDVTV   | Negative |
| P02872 | SFNFNSFSEGNPAINFQGDV   | Negative |
| P02872 | KVDSAETVSFNFNSFSEGNP   | Negative |
| P02872 | FFLLLAASSKKVDSAETVSF   | Negative |
| P02872 | KKVDSAETVSFNFNSFSEGN   | Negative |
| P02872 | FLTFFLLLAASSKKVDSAET   | Negative |
| P02872 | SAETVSFNFNSFSEGNPAIN   | Negative |
| P02872 | SSKKVDSAETVSFNFNSFSE   | Negative |
| P02872 | FNFSFSEGNPAINFQGDVT    | Negative |
| P02872 | LLLAASSKKVDSAETVSFNF   | Negative |
| P02872 | TVSFNFNSFSEGNPAINFQG   | Negative |
| P02872 | FLLLAASSKKVDSAETVSFN   | Negative |
| P02872 | KPFCVFLTFFLLLAASSKKV   | Negative |
| P02872 | AETVSFNFNSFSEGNPAINF   | Negative |
| P02872 | VSFNFNSFSEGNPAINFQGD   | Negative |
| P02872 | FCVFLTFFLLLAASSKKVDS   | Negative |
| P02873 | FLALLSHANSATETSFIIDA   | Negative |
| P02873 | MIMASSKLLSLALFLALLSH   | Negative |
| P02873 | ETSFIIIDAFNKTNLILQGDA  | Negative |
| P02873 | IMASSKLLSLALFLALLSHA   | Negative |
| P02873 | FIIDAFNKTNLILQGDTV     | Negative |
| P02873 | ATETSFIIDAFNKTNLILQG   | Negative |
| P02873 | ASSKLLSLALFLALLSHANS   | Negative |
| P02873 | SLALFLALLSHANSATETSF   | Negative |
| P02873 | LLSLALFLALLSHANSATET   | Negative |
| P02873 | ALFLALLSHANSATETSFI    | Negative |
| P02873 | SKLLSLALFLALLSHANSAT   | Negative |
| P02873 | LFLALLSHANSATETSFIID   | Negative |
| P02873 | LALLSHANSATETSFIIDAF   | Negative |
| P02873 | SFIIDAFNKTNLILQGDTV    | Negative |

|        |                      |          |
|--------|----------------------|----------|
| P02873 | LALFLALLSHANSATETSFI | Negative |
| P02873 | LLSHANSATETSFIIDAFNK | Negative |
| P02873 | MASSKLLSLALFLALLSHAN | Negative |
| P02873 | SHANSATETSFIIDAFNKTN | Negative |
| P02873 | NSATETSFIIDAFNKTNLIL | Negative |
| P02873 | IIDAFNKTNLILQGDATVSS | Negative |
| P02873 | SSKLLSLALFLALLSHANSA | Negative |
| P02873 | ALLSHANSATETSFIIDAFN | Negative |
| P02873 | SATETSFIIDAFNKTNLILQ | Negative |
| P02873 | LSHANSATETSFIIDAFNK  | Negative |
| P02873 | TSFIIDAFNKTNLILQGDAT | Negative |
| P02873 | TETSFIIDAFNKTNLILQGD | Negative |
| P02873 | HANSATETSFIIDAFNKTNL | Negative |
| P02873 | KLLSLALFLALLSHANSATE | Negative |
| P02873 | ANSATETSFIIDAFNKTNLI | Negative |
| P02876 | LGAAVFLAFAAATAQAQRCG | Negative |
| P02876 | FLAFAAATAQAQRCGEQGSN | Negative |
| P02876 | TAQAQRCGEQGSNMECPNNL | Negative |
| P02876 | MRKMMSTMALTLGAAVFLAF | Negative |
| P02876 | QRCGEQGSNMECPNNLCCSQ | Negative |
| P02876 | LTLGAAVFLAFAAATAQAQR | Negative |
| P02876 | FAAATAQAQRCGEQGSNMEC | Negative |
| P02876 | RCGEQGSNMECPNNLCCSQY | Negative |
| P02876 | ALTLGAAVFLAFAAATAQAQ | Negative |
| P02876 | QAQRCGEQGSNMECPNNLCC | Negative |
| P02876 | AAVFLAFAAATAQAQRCGEQ | Negative |
| P02876 | CGEQGSNMECPNNLCCSQYG | Negative |
| P02876 | AQRCGEQGSNMECPNNLCCS | Negative |
| P02876 | MSTMALTLGAAVFLAFAAAT | Negative |
| P02876 | TLGAAVFLAFAAATAQAQRC | Negative |
| P02876 | AQAQRCGEQGSNMECPNNLC | Negative |
| P02876 | VFLAFAAATAQAQRCGEQGS | Negative |
| P02876 | AATAQAQRCGEQGSNMECPN | Negative |
| P02876 | TMALTLGAAVFLAFAAATAQ | Negative |
| P02876 | AFAAATAQAQRCGEQGSNME | Negative |
| P02876 | AAATAQAQRCGEQGSNMECP | Negative |
| P02876 | KMMSTMALTLGAAVFLAFAA | Negative |
| P02876 | ATAQAQRCGEQGSNMECPNN | Negative |
| P02876 | MMSTMALTLGAAVFLAFAAA | Negative |
| P02876 | AVFLAFAAATAQAQRCGEQG | Negative |
| P02876 | LAFAAATAQAQRCGEQGSNM | Negative |
| P02876 | STMALTLGAAVFLAFAAATA | Negative |
| P02876 | RKMMSTMALTLGAAVFLAFA | Negative |
| P02876 | MALTLGAAVFLAFAAATAQA | Negative |
| P02877 | LLCLTGVAIAEQCGRQAGGK | Negative |
| P02877 | KLCPNNLCCSQWGWCGSTDE | Negative |

|        |                      |          |
|--------|----------------------|----------|
| P02877 | EQCGRQAGGKLCPNNLCCSQ | Negative |
| P02877 | LCLTGVAIAEQCGRQAGGKL | Negative |
| P02877 | RQAGGKLCPNNLCCSQWGW  | Negative |
| P02877 | CGRQAGGKLCPNNLCCSQWG | Negative |
| P02877 | CPNNLCCSQWGWCGSTDEYC | Negative |
| P02877 | VAIAEQCGRQAGGKLCPNNL | Negative |
| P02877 | CLTGVAIAEQCGRQAGGKLC | Negative |
| P02877 | AIAEQCGRQAGGKLCPNNL  | Negative |
| P02877 | GRQAGGKLCPNNLCCSQWGW | Negative |
| P02877 | IVVLLCLTGVAIAEQCGRQA | Negative |
| P02877 | GVAIAEQCGRQAGGKLCPNN | Negative |
| P02877 | VVLLCLTGVAIAEQCGRQAG | Negative |
| P02877 | AGGKLCPNNLCCSQWGWCGS | Negative |
| P02877 | QAGGKLCPNNLCCSQWGWCG | Negative |
| P02877 | LCPNNLCCSQWGWCGSTDEY | Negative |
| P02877 | LTGVAIAEQCGRQAGGKLCP | Negative |
| P02877 | VLLCLTGVAIAEQCGRQAGG | Negative |
| P02877 | QCGRQAGGKLCPNNLCCSQW | Negative |
| P02877 | AEQCGRQAGGKLCPNNLCCS | Negative |
| P02877 | NIFIVVLLCLTGVAIAEQCG | Negative |
| P02877 | GKLCPNNLCCSQWGWCGSTD | Negative |
| P02877 | MNIFIVVLLCLTGVAIAEQC | Negative |
| P02877 | GGKLCPNNLCCSQWGWCGST | Negative |
| P02877 | IAEQCGRQAGGKLCPNNLCC | Negative |
| P02877 | PNNLCCSQWGWCGSTDEYCS | Negative |
| P02877 | TGVAIAEQCGRQAGGKLCPN | Negative |
| P02877 | FIVVLLCLTGVAIAEQCGRQ | Negative |
| P02879 | NTIVIWMYAVATWLCFGSTS | Negative |
| P02879 | VATWLCFGSTSGWSFTLEDN | Negative |
| P02879 | SFTLEDNNIFPKQYPIINFT | Negative |
| P02879 | IVIWMYAVATWLCFGSTSGW | Negative |
| P02879 | WLCFGSTSGWSFTLEDNNIF | Negative |
| P02879 | MYAVATWLCFGSTSGWSFTL | Negative |
| P02879 | PGGNTIVIWMYAVATWLCFG | Negative |
| P02879 | STSGWSFTLEDNNIFPKQYP | Negative |
| P02879 | FTLEDNNIFPKQYPIINFTT | Negative |
| P02879 | LCFGSTSGWSFTLEDNNIFP | Negative |
| P02879 | GGNTIVIWMYAVATWLCFGS | Negative |
| P02879 | YAVATWLCFGSTSGWSFTLE | Negative |
| P02879 | SGWSFTLEDNNIFPKQYPII | Negative |
| P02879 | IWMYAVATWLCFGSTSGWSF | Negative |
| P02879 | MKPGGNTIVIWMYAVATWLC | Negative |
| P02879 | CFGSTSGWSFTLEDNNIFPK | Negative |
| P02879 | TIVIWMYAVATWLCFGSTSG | Negative |
| P02879 | AVATWLCFGSTSGWSFTLED | Negative |
| P02879 | GWSFTLEDNNIFPKQYPIIN | Negative |

|        |                       |          |
|--------|-----------------------|----------|
| P02879 | VIWMYAVATWLCFGSTSGWS  | Negative |
| P02879 | TLEDNNIFPKQYPIINFTTA  | Negative |
| P02879 | TSGWSFTLEDNNIFPKQYPI  | Negative |
| P02879 | KPGGNTIVIWMYAVATWLCF  | Negative |
| P02879 | GSTSGWSFTLEDNNIFPKQY  | Negative |
| P02879 | ATWLCFGSTSGWSFTLEDNN  | Negative |
| P02879 | WSFTLEDNNIFPKQYPIINF  | Negative |
| P02879 | TWLCFGSTSGWSFTLEDNNI  | Negative |
| P02879 | GNTIVIWMYAVATWLCFGST  | Negative |
| P02879 | WMYAVATWLCFGSTSGWSFT  | Negative |
| P02896 | CHTKETLGVTQWRRSTMLTL  | Negative |
| P02896 | GVTQWRRSTMLTSLLYAIT   | Negative |
| P02896 | LTLSELLYAITPADGAKEALE | Negative |
| P02896 | PADGAKEALEYKTWTNHCGL  | Negative |
| P02896 | TKETLGVTQWRRSTMLTSL   | Negative |
| P02896 | DCHTKETLGVTQWRRSTMLT  | Negative |
| P02896 | RSTMLTSLLYAITPADGAK   | Negative |
| P02896 | SLLYAITPADGAKEALEYKT  | Negative |
| P02896 | MDCHTKETLGVTQWRRSTML  | Negative |
| P02896 | TPADGAKEALEYKTWTNHCG  | Negative |
| P02896 | QWRRSTMLTSLLYAITPAD   | Negative |
| P02896 | LSLLYAITPADGAKEALEYK  | Negative |
| P02896 | WRRSTMLTSLLYAITPADG   | Negative |
| P02896 | STMLTSLLYAITPADGAKE   | Negative |
| P02896 | LLYAITPADGAKEALEYKTW  | Negative |
| P02896 | VTQWRRSTMLTSLLYAITP   | Negative |
| P02896 | TMLTSLLYAITPADGAKEA   | Negative |
| P02896 | YAITPADGAKEALEYKTWTN  | Negative |
| P02896 | ETLGVTQWRRSTMLTSLLY   | Negative |
| P02896 | RRSTMLTSLLYAITPADGA   | Negative |
| P02896 | HTKETLGVTQWRRSTMLTSL  | Negative |
| P02896 | KETLGVTQWRRSTMLTSL    | Negative |
| P02896 | LYAITPADGAKEALEYKTWT  | Negative |
| P02896 | TQWRRSTMLTSLLYAITPA   | Negative |
| P02896 | TSLLYAITPADGAKEALEY   | Negative |
| P02896 | ITPADGAKEALEYKTWTNHC  | Negative |
| P02896 | LGVTQWRRSTMLTSLLYAI   | Negative |
| P02896 | AITPADGAKEALEYKTWTNH  | Negative |
| P02896 | TLGVTQWRRSTMLTSLLYA   | Negative |
| P02906 | KWGVGFTLLLASTSILAKDI  | Negative |
| P02906 | FTLLLASTSILAKDIQLLN   | Negative |
| P02906 | VSYDPTRELYEQYNKAFAH   | Negative |
| P02906 | MKKWGVGFTLLLASTSILAK  | Negative |
| P02906 | LASTSILAKDIQLLNVSYP   | Negative |
| P02906 | VGFTLLLASTSILAKDIQL   | Negative |
| P02906 | ILAKDIQLLNVSYPDPTRELY | Negative |

|        |                       |          |
|--------|-----------------------|----------|
| P02906 | AKDIQLLNVSYPDTRELYEQ  | Negative |
| P02906 | LAKDIQLLNVSYPDTRELYE  | Negative |
| P02906 | NVSYPDTRELYEQYNKAFA   | Negative |
| P02906 | TLLLASTSILAKDIQLLNVS  | Negative |
| P02906 | KKWGVGFTLLLASTSILAKD  | Negative |
| P02906 | QLLNVSYPDTRELYEQYNKA  | Negative |
| P02906 | YDPTRELYEQYNKAFAHWA   | Negative |
| P02906 | DIQLLNVSYPDTRELYEQYN  | Negative |
| P02906 | IQLLNVSYPDTRELYEQYNK  | Negative |
| P02906 | TSILAKDIQLLNVSYPDTRE  | Negative |
| P02906 | WGVGFTLLLASTSILAKDIQ  | Negative |
| P02906 | KDIQLLNVSYPDTRELYEQY  | Negative |
| P02906 | LLLASTSILAKDIQLLNVS   | Negative |
| P02906 | SILAKDIQLLNVSYPDTREL  | Negative |
| P02906 | SYDPTRELYEQYNKAFAHWA  | Negative |
| P02906 | DPTRELYEQYNKAFAHWAQ   | Negative |
| P02906 | LNVSYPDTRELYEQYNKAFA  | Negative |
| P02906 | GFTLLLASTSILAKDIQLLN  | Negative |
| P02906 | LLNVSYDPTRELYEQYNKAF  | Negative |
| P02906 | STSILAKDIQLLNVSYPDTR  | Negative |
| P02906 | LLASTSILAKDIQLLNVS    | Negative |
| P02906 | ASTSILAKDIQLLNVSYPDT  | Negative |
| P02910 | LVLAFASSATAAFAAIPQKIR | Negative |
| P02910 | FAAIPQKIRIGTDPTYAPFE  | Negative |
| P02910 | AAIPQKIRIGTDPTYAPFES  | Negative |
| P02910 | FSSATAAFAAIPQKIRIGTD  | Negative |
| P02910 | KLALSLSLVLAFASSATAAFA | Negative |
| P02910 | KIRIGTDPTYAPFESKNAQG  | Negative |
| P02910 | QKIRIGTDPTYAPFESKNAQ  | Negative |
| P02910 | IRIGTDPTYAPFESKNAQGE  | Negative |
| P02910 | AFAAIPQKIRIGTDPTYAP   | Negative |
| P02910 | SSATAAFAAIPQKIRIGTDP  | Negative |
| P02910 | AIPQKIRIGTDPTYAPFESK  | Negative |
| P02910 | SATAAFAAIPQKIRIGTDPT  | Negative |
| P02910 | RIGTDPTYAPFESKNAQGEL  | Negative |
| P02910 | AFSSATAAFAAIPQKIRIGT  | Negative |
| P02910 | SLSLVLAFASSATAAFAAIPQ | Negative |
| P02910 | IGTDPTYAPFESKNAQGELV  | Negative |
| P02910 | VLAFSSATAAFAAIPQKIRI  | Negative |
| P02910 | TAAFAAIPQKIRIGTDPTYA  | Negative |
| P02910 | IPQKIRIGTDPTYAPFESKN  | Negative |
| P02910 | MKKLALSLSLVLAFASSATAA | Negative |
| P02910 | AFAAIPQKIRIGTDPTYAPF  | Negative |
| P02910 | ATAAFAAIPQKIRIGTDPTY  | Negative |
| P02910 | PQKIRIGTDPTYAPFESKNA  | Negative |
| P02910 | KKLALSLSLVLAFASSATAAF | Negative |



|        |                       |          |
|--------|-----------------------|----------|
| P02910 | SLVLAFSSATAAFAAIPQKI  | Negative |
| P02910 | ALSLSLVLAFSSATAAFAAI  | Negative |
| P02910 | LAFSSATAAFAAIPQKIRIG  | Negative |
| P02910 | LSLSLVLAFSSATAAFAAIP  | Negative |
| P02910 | LALSLSLVLAFSSATAAFAA  | Negative |
| P02924 | KFTKALAAIGLAAVMSQSAM  | Negative |
| P02924 | SAMAENLKLGLFLVKQPEEPW | Negative |
| P02924 | FLVKQPEEPWFQTEWKFADK  | Negative |
| P02924 | IGLAAVMSQSAMAENLKLGF  | Negative |
| P02924 | MSQSAMAENLKLGLFLVKQPE | Negative |
| P02924 | SQSAMAENLKLGLFLVKQPEE | Negative |
| P02924 | FTKALAAIGLAAVMSQSAMA  | Negative |
| P02924 | LGFLVKQPEEPWFQTEWKFA  | Negative |
| P02924 | QSAMAENLKLGLFLVKQPEEP | Negative |
| P02924 | LKLGLFLVKQPEEPWFQTEWK | Negative |
| P02924 | ENLKLGLFLVKQPEEPWFQTE | Negative |
| P02924 | KLGLFLVKQPEEPWFQTEWKF | Negative |
| P02924 | NLKLGLFLVKQPEEPWFQTEW | Negative |
| P02924 | AAVMSQSAMAENLKLGLFLVK | Negative |
| P02924 | GFLVKQPEEPWFQTEWKFAD  | Negative |
| P02924 | VMSQSAMAENLKLGLFLVKQP | Negative |
| P02924 | AMAENLKLGLFLVKQPEEPWF | Negative |
| P02924 | TKALAAIGLAAVMSQSAMAE  | Negative |
| P02924 | ALAAIGLAAVMSQSAMAENL  | Negative |
| P02924 | AENLKLGLFLVKQPEEPWFQT | Negative |
| P02924 | LAAIGLAAVMSQSAMAENLK  | Negative |
| P02924 | AVMSQSAMAENLKLGLFLVKQ | Negative |
| P02924 | GLAAVMSQSAMAENLKLGLF  | Negative |
| P02924 | AIGLAAVMSQSAMAENLKLG  | Negative |
| P02924 | LAAVMSQSAMAENLKLGLV   | Negative |
| P02924 | HKFTKALAAIGLAAVMSQSA  | Negative |
| P02924 | MHKFTKALAAIGLAAVMSQS  | Negative |
| P02924 | MAENLKLGLFLVKQPEEPWFQ | Negative |
| P02924 | KALAAIGLAAVMSQSAMAEN  | Negative |
| P02925 | LSATVSANAMAKDTIALVVS  | Negative |
| P02925 | VSANAMAKDTIALVVSTLNN  | Negative |
| P02925 | MAKDTIALVVSTLNNPFFVS  | Negative |
| P02925 | AKDTIALVVSTLNNPFFVSL  | Negative |
| P02925 | KDTIALVVSTLNNPFFVSLK  | Negative |
| P02925 | LVSAVALSATVSANAMAKDT  | Negative |
| P02925 | TLVSAVALSATVSANAMAKD  | Negative |
| P02925 | TIALVVSTLNNPFFVSLKDG  | Negative |
| P02925 | NAMAKDTIALVVSTLNNPFF  | Negative |
| P02925 | VSAVALSATVSANAMAKDTI  | Negative |
| P02925 | IALVVSTLNNPFFVSLKDGA  | Negative |
| P02925 | ALSATVSANAMAKDTIALVV  | Negative |

|        |                       |          |
|--------|-----------------------|----------|
| P02925 | SANAMAKDTIALVVSTLNNP  | Negative |
| P02925 | KKLATLVSAVALSATVSANA  | Negative |
| P02925 | DTIALVVSTLNNPFFVSLKD  | Negative |
| P02925 | TVSANAMAKDTIALVVSTLN  | Negative |
| P02925 | ANAMAKDTIALVVSTLNNPF  | Negative |
| P02925 | AMAKDTIALVVSTLNNPFFV  | Negative |
| P02925 | LATLVSAVALSATVSANAMA  | Negative |
| P02925 | AVALSATVSANAMAKDTIAL  | Negative |
| P02925 | MKKLATLVSAVALSATVSAN  | Negative |
| P02925 | KLATLVSAVALSATVSANAM  | Negative |
| P02925 | ATVSANAMAKDTIALVVSTL  | Negative |
| P02925 | NMKKLATLVSAVALSATVSA  | Negative |
| P02925 | ATLVSAVALSATVSANAMAK  | Negative |
| P02925 | VALSATVSANAMAKDTIALV  | Negative |
| P02925 | ALVVSTLNNPFFVSLKDGAQ  | Negative |
| P02925 | MNMKKLATLVSAVALSATVS  | Negative |
| P02925 | SATVSANAMAKDTIALVVST  | Negative |
| P02970 | MAHAWMTGDFNGSVDIGGSI  | Negative |
| P02970 | TLIALAIAASAASGMAHAWM  | Negative |
| P02970 | AASAASGMAHAWMTGDFNGS  | Negative |
| P02970 | TGDFNGSVDIGGSITADDYR  | Negative |
| P02970 | ASGMAHAWMTGDFNGSVDIG  | Negative |
| P02970 | AHAWMTGDFNGSVDIGGSIT  | Negative |
| P02970 | MKKTIALAIAASAASGMAH   | Negative |
| P02970 | KTLIALAIAASAASGMAHAW  | Negative |
| P02970 | GMAHAWMTGDFNGSVDIGGS  | Negative |
| P02970 | DFNGSVDIGGSITADDYRQK  | Negative |
| P02970 | FNGSVDIGGSITADDYRQKW  | Negative |
| P02970 | IALAIAASAASGMAHAWMTG  | Negative |
| P02970 | AIAASAASGMAHAWMTGDFN  | Negative |
| P02970 | GDFNGSVDIGGSITADDYRQ  | Negative |
| P02970 | GSVDIGGSITADDYRQKWEW  | Negative |
| P02970 | LALIAASAASGMAHAWMTGDF | Negative |
| P02970 | SAASGMAHAWMTGDFNGSVD  | Negative |
| P02970 | KKTLIALAIAASAASGMAHA  | Negative |
| P02970 | ASAASGMAHAWMTGDFNGSV  | Negative |
| P02970 | SVDIGGSITADDYRQKWEWK  | Negative |
| P02970 | HAWMTGDFNGSVDIGGSITA  | Negative |
| P02970 | AWMTGDFNGSVDIGGSITAD  | Negative |
| P02970 | SGMAHAWMTGDFNGSVDIGG  | Negative |
| P02970 | WMTGDFNGSVDIGGSITADD  | Negative |
| P02970 | NGSVDIGGSITADDYRQKWE  | Negative |
| P02970 | IAASAASGMAHAWMTGDFNG  | Negative |
| P02970 | MTGDFNGSVDIGGSITADDY  | Negative |
| P02970 | LIALAIAASAASGMAHAWMT  | Negative |
| P02970 | AASGMAHAWMTGDFNGSVDI  | Negative |

|        |                       |          |
|--------|-----------------------|----------|
| P02977 | HYWLRKLKKGTASVAVALSV  | Negative |
| P02977 | VALSVLGAGLVVNTNEVSAA  | Negative |
| P02977 | KGTASVAVALSVLGAGLVVN  | Negative |
| P02977 | NTNKHYWLRKLKKGTASVAV  | Negative |
| P02977 | WLRKLKKGTASVAVALSVLG  | Negative |
| P02977 | LSVLGAGLVVNTNEVSAAVT  | Negative |
| P02977 | GAGLVVNTNEVSAAVTRGTI  | Negative |
| P02977 | SVAVALSVLGAGLVVNTNEV  | Negative |
| P02977 | GTASVAVALSVLGAGLVVNT  | Negative |
| P02977 | ENTNKHYWLRKLKKGTASVA  | Negative |
| P02977 | NKHYWLRKLKKGTASVAVAL  | Negative |
| P02977 | KLKKGTASVAVALSVLGAGL  | Negative |
| P02977 | SVLGAGLVVNTNEVSAAVTR  | Negative |
| P02977 | KHYWLRKLKKGTASVAVALS  | Negative |
| P02977 | MARENTNKHYWLRKLKKGTA  | Negative |
| P02977 | RENTNKHYWLRKLKKGTASV  | Negative |
| P02977 | TASVAVALSVLGAGLVVNTN  | Negative |
| P02977 | VAVALSVLGAGLVVNTNEVS  | Negative |
| P02977 | ALSVLGAGLVVNTNEVSAAV  | Negative |
| P02977 | LGAGLVVNTNEVSAAVTRGT  | Negative |
| P02977 | TNKHYWLRKLKKGTASVAVA  | Negative |
| P02977 | KKGTASVAVALSVLGAGLVV  | Negative |
| P02977 | LRKLKKGTASVAVALSVLGA  | Negative |
| P02977 | YWLRKLKKGTASVAVALSVL  | Negative |
| P02977 | ARENTNKHYWLRKLKKGTAS  | Negative |
| P02977 | RKLKKGTASVAVALSVLGAG  | Negative |
| P02977 | LKKGTASVAVALSVLGAGLV  | Negative |
| P02977 | ASVAVALSVLGAGLVVNTNE  | Negative |
| P02977 | AVALSVLGAGLVVNTNEVSA  | Negative |
| P03950 | LAQDNSRYTHFLTQHYDAKP  | Negative |
| P03950 | VFVLGLGLTPPTLAQDNSRY  | Negative |
| P03950 | PPTLAQDNSRYTHFLTQHYD  | Negative |
| P03950 | LTPPTLAQDNSRYTHFLTQH  | Negative |
| P03950 | MVMGLGVLLL VFVLGLGLTP | Negative |
| P03950 | LGLTPPTLAQDNSRYTHFLT  | Negative |
| P03950 | LGVLLL VFVLGLGLTPPTLA | Negative |
| P03950 | VMGLGVLLL VFVLGLGLTPP | Negative |
| P03950 | VLLL VFVLGLGLTPPTLAQD | Negative |
| P03950 | SRYTHFLTQHYDAKPQGRDD  | Negative |
| P03950 | GVLLL VFVLGLGLTPPTLAQ | Negative |
| P03950 | FVLGLGLTPPTLAQDNSRYT  | Negative |
| P03950 | LLLVFVLGLGLTPPTLAQDN  | Negative |
| P03950 | MGLGVLLL VFVLGLGLTPPT | Negative |
| P03950 | NSRYTHFLTQHYDAKPQGRD  | Negative |
| P03950 | LGLGLTPPTLAQDNSRYTHF  | Negative |
| P03950 | VLGLGLTPPTLAQDNSRYTH  | Negative |

|        |                       |          |
|--------|-----------------------|----------|
| P03950 | PTLAQDNSRYTHFLTQHLYDA | Negative |
| P03950 | GLGVLLLVFVLGLGLTPPTL  | Negative |
| P03950 | QDNSRYTHFLTQHLYDAKPQG | Negative |
| P03950 | LLVFVLGLGLTPPTLAQDNS  | Negative |
| P03950 | AQDNSRYTHFLTQHLYDAKPQ | Negative |
| P03950 | TLAQDNSRYTHFLTQHLYDAK | Negative |
| P03950 | RYTHFLTQHLYDAKPQGRDDR | Negative |
| P03950 | YTHFLTQHLYDAKPQGRDDRY | Negative |
| P03950 | GLGLTPPTLAQDNSRYTHFL  | Negative |
| P03950 | GLTPPTLAQDNSRYTHFLTQ  | Negative |
| P03950 | DNSRYTHFLTQHLYDAKPQGR | Negative |
| P03950 | TPPTLAQDNSRYTHFLTQHY  | Negative |
| P03973 | AVEGSGKSFKAGVCPPKKSA  | Negative |
| P03973 | MKSSGLFPFLVLLALGTLAP  | Negative |
| P03973 | PWAVEGSGKSFKAGVCPPKK  | Negative |
| P03973 | KSFAGVCPPKKSAQCLRYK   | Negative |
| P03973 | LFPFLVLLALGTLAPWAVEG  | Negative |
| P03973 | FPFLVLLALGTLAPWAVEGS  | Negative |
| P03973 | LLALGTLAPWAVEGSGKSKF  | Negative |
| P03973 | EGSGKSFKAGVCPPKKSAQC  | Negative |
| P03973 | APWAVEGSGKSFKAGVCPPK  | Negative |
| P03973 | ALGTLAPWAVEGSGKSKFAG  | Negative |
| P03973 | LVLLALGTLAPWAVEGSGKS  | Negative |
| P03973 | KSSGLFPFLVLLALGTLAPW  | Negative |
| P03973 | SGLFPFLVLLALGTLAPWAV  | Negative |
| P03973 | FKAGVCPPKKSAQCLRYKKP  | Negative |
| P03973 | GSGKSKFAGVCPPKKSAQCL  | Negative |
| P03973 | LGTLAPWAVEGSGKSKFAGV  | Negative |
| P03973 | WAVEGSGKSKFAGVCPPKKS  | Negative |
| P03973 | TLAPWAVEGSGKSKFAGVCP  | Negative |
| P03973 | VEGSGKSKFAGVCPPKKSAQ  | Negative |
| P03973 | PFLVLLALGTLAPWAVEGSG  | Negative |
| P03973 | SFKAGVCPPKKSAQCLRYKK  | Negative |
| P03973 | SGKSKFAGVCPPKKSAQCLR  | Negative |
| P03973 | GLFPFLVLLALGTLAPWAVE  | Negative |
| P03973 | LAPWAVEGSGKSKFAGVCP   | Negative |
| P03973 | SSGLFPFLVLLALGTLAPWA  | Negative |
| P03973 | FLVLLALGTLAPWAVEGSGK  | Negative |
| P03973 | LALGTLAPWAVEGSGKSKFA  | Negative |
| P03973 | GKSKFAGVCPPKKSAQCLRY  | Negative |
| P03973 | GTLAPWAVEGSGKSKFAGVC  | Negative |
| P03998 | VSVLAGDPNVPTCLCEEPTL  | Negative |
| P03998 | MEKKLLGAILFVTVVSVLA   | Negative |
| P03998 | AILFVTVVSVLAGDPNVPTC  | Negative |
| P03998 | CEEPTLLGRKVIVSQETKDK  | Negative |
| P03998 | VTVVSVLAGDPNVPTCLCEE  | Negative |

|        |                       |          |
|--------|-----------------------|----------|
| P03998 | AGDPNVPTCLCEEPTLLGRK  | Negative |
| P03998 | ILFVTVVSVLADPNVPTCL   | Negative |
| P03998 | EKKLLGIAILFVTVVSVLAD  | Negative |
| P03998 | LCEEPTLLGRKVIVSQETKD  | Negative |
| P03998 | VPTCLCEEPTLLGRKVIVSQ  | Negative |
| P03998 | TVVSVLADPNVPTCLCEEP   | Negative |
| P03998 | LLGIAILFVTVVSVLADPN   | Negative |
| P03998 | PNVPTCLCEEPTLLGRKVIV  | Negative |
| P03998 | FVTVVSVLADPNVPTCLCE   | Negative |
| P03998 | GDPNVPTCLCEEPTLLGRKV  | Negative |
| P03998 | NVPTCLCEEPTLLGRKVIVS  | Negative |
| P03998 | CLCEEPTLLGRKVIVSQETK  | Negative |
| P03998 | IAILFVTVVSVLADPNVPT   | Negative |
| P03998 | VLADPNVPTCLCEEPTLLG   | Negative |
| P03998 | VVSVLADPNVPTCLCEEPT   | Negative |
| P03998 | LAGDPNVPTCLCEEPTLLGR  | Negative |
| P03998 | TCLCEEPTLLGRKVIVSQET  | Negative |
| P03998 | GIAILFVTVVSVLADPNVP   | Negative |
| P03998 | KKLLGIAILFVTVVSVLAD   | Negative |
| P03998 | KLLGIAILFVTVVSVLADP   | Negative |
| P03998 | DPNVPTCLCEEPTLLGRKVI  | Negative |
| P03998 | LFVTVVSVLADPNVPTCLC   | Negative |
| P03998 | SVLAGDPNVPTCLCEEPTLL  | Negative |
| P03998 | PTCLCEEPTLLGRKVIVSQE  | Negative |
| P04002 | TEASPDPAAKAAPAAAAAPA  | Negative |
| P04002 | PDPAAKAAPAAAAAPAAAAAP | Negative |
| P04002 | ITEASPDPAAKAAPAAAAAP  | Negative |
| P04002 | AKAAPAAAAAPAAAAAPDTAS | Negative |
| P04002 | SLFTVGQLIFLFWTMRITEA  | Negative |
| P04002 | ASPDPAAKAAPAAAAAPAAA  | Negative |
| P04002 | QLIFLFWTMRITEASPDPA   | Negative |
| P04002 | FLFWTMRITEASPDPAKAA   | Negative |
| P04002 | ALSLFTVGQLIFLFWTMRIT  | Negative |
| P04002 | VGQLIFLFWTMRITEASPD   | Negative |
| P04002 | EASPDPAAKAAPAAAAAPAA  | Negative |
| P04002 | KAAPAAAAAPAAAAAPDTASD | Negative |
| P04002 | TMRITEASPDPAAKAAPAAA  | Negative |
| P04002 | PAAKAAPAAAAAPAAAAAPDT | Negative |
| P04002 | RITEASPDPAAKAAPAAAAA  | Negative |
| P04002 | LIFLFWTMRITEASPDPAK   | Negative |
| P04002 | LFTVGQLIFLFWTMRITEAS  | Negative |
| P04002 | MALSLFTVGQLIFLFWTMRI  | Negative |
| P04002 | FWTMRITEASPDPAKAAPA   | Negative |
| P04002 | SPDPAAKAAPAAAAAPAAAA  | Negative |
| P04002 | FTVGQLIFLFWTMRITEASP  | Negative |
| P04002 | LSLFTVGQLIFLFWTMRITE  | Negative |

|        |                      |          |
|--------|----------------------|----------|
| P04002 | AAKAAPAAAAAPAAAAPDTA | Negative |
| P04002 | MRITEASPDPAAKAAPAAAA | Negative |
| P04002 | IFLFWTMRITEASPDPAAKA | Negative |
| P04002 | WTMRITEASPDPAAKAAPAA | Negative |
| P04002 | LFWTMRITEASPDPAAKAAP | Negative |
| P04002 | DPAAKAAPAAAAAPAAAAPD | Negative |
| P04002 | TVGQLIFLFWTMRITEASPD | Negative |
| P04003 | VSDPILFQMTLIAALLPAVL | Negative |
| P04003 | HRKRKMAAWPFSRLWKVSDP | Negative |
| P04003 | SGALHRKRKMAAWPFSRLWK | Negative |
| P04003 | AAWPFSRLWKVSDPILFQMT | Negative |
| P04003 | SDPILFQMTLIAALLPAVLG | Negative |
| P04003 | MAAWPFSRLWKVSDPILFQM | Negative |
| P04003 | FSRLWKVSDPILFQMTLIAA | Negative |
| P04003 | PPKTPSGALHRKRKMAAWPF | Negative |
| P04003 | KTPSGALHRKRKMAAWPFSR | Negative |
| P04003 | WPFSRLWKVSDPILFQMTLI | Negative |
| P04003 | PKTPSGALHRKRKMAAWPFS | Negative |
| P04003 | ALHRKRKMAAWPFSRLWKVS | Negative |
| P04003 | SRLWKVSDPILFQMTLIAAL | Negative |
| P04003 | DPILFQMTLIAALLPAVLGN | Negative |
| P04003 | PFSRLWKVSDPILFQMTLIA | Negative |
| P04003 | PSGALHRKRKMAAWPFSRLW | Negative |
| P04003 | KRKMAAWPFSRLWKVSDPIL | Negative |
| P04003 | TPSGALHRKRKMAAWPFSRL | Negative |
| P04003 | RLWKVSDPILFQMTLIAALL | Negative |
| P04003 | LWKVSDPILFQMTLIAALLP | Negative |
| P04003 | HPPKTPSGALHRKRKMAAWP | Negative |
| P04003 | AWPFSRLWKVSDPILFQMTL | Negative |
| P04003 | RKRKMAAWPFSRLWKVSDPI | Negative |
| P04003 | KVSDPILFQMTLIAALLPAV | Negative |
| P04003 | MHPPKTPSGALHRKRKMAAW | Negative |
| P04003 | LHRKRKMAAWPFSRLWKVSD | Negative |
| P04003 | GALHRKRKMAAWPFSRLWKV | Negative |
| P04003 | KMAAWPFSRLWKVSDPILFQ | Negative |
| P04003 | WKVSDPILFQMTLIAALLPA | Negative |
| P04003 | RKMAAWPFSRLWKVSDPILF | Negative |
| P04004 | PLRPLLILALLAWVALADQE | Negative |
| P04004 | WVALADQESCKGRCTEGFNV | Negative |
| P04004 | KGRCTEGFNVDKKCQCDEL  | Negative |
| P04004 | LADQESCKGRCTEGFNVDKK | Negative |
| P04004 | EGFNVDKKCQCDELCSYYQS | Negative |
| P04004 | MAPLRPLLILALLAWVALAD | Negative |
| P04004 | ESCKGRCTEGFNVDKKCQCD | Negative |
| P04004 | CKGRCTEGFNVDKKCQCDEL | Negative |
| P04004 | PLLILALLAWVALADQESCK | Negative |

|        |                       |          |
|--------|-----------------------|----------|
| P04004 | AWVALADQESCKGRCTEGFN  | Negative |
| P04004 | VALADQESCKGRCTEGFNVD  | Negative |
| P04004 | CTEGFNVDKKKCQCDELCSYY | Negative |
| P04004 | TEGFNVDKKKCQCDELCSYYQ | Negative |
| P04004 | LILALLAWVALADQESCKGR  | Negative |
| P04004 | ALLAWVALADQESCKGRCTE  | Negative |
| P04004 | APLRPLLILALLAWVALADQ  | Negative |
| P04004 | LRPLLILALLAWVALADQES  | Negative |
| P04004 | ALADQESCKGRCTEGFNVDK  | Negative |
| P04004 | QESCKGRCTEGFNVDKKKCQC | Negative |
| P04004 | DQESCKGRCTEGFNVDKKCQ  | Negative |
| P04004 | LLILALLAWVALADQESCKG  | Negative |
| P04004 | ILALLAWVALADQESCKGRC  | Negative |
| P04004 | SCKGRCTEGFNVDKKKCQCDE | Negative |
| P04004 | ADQESCKGRCTEGFNVDKKC  | Negative |
| P04004 | LAWVALADQESCKGRCTEGF  | Negative |
| P04004 | GRCTEGFNVDKKKCQCDELCS | Negative |
| P04004 | LLAWVALADQESCKGRCTEG  | Negative |
| P04004 | RCTEGFNVDKKKCQCDELCSY | Negative |
| P04004 | LALLAWVALADQESCKGRCT  | Negative |
| P04032 | SFGLAVSGVAADGAALYKSC  | Negative |
| P04032 | FGLAVSGVAADGAALYKSCI  | Negative |
| P04032 | AALSFGGLAVSGVAADGAALY | Negative |
| P04032 | GVAADGAALYKSCIGCHGAD  | Negative |
| P04032 | AADGAALYKSCIGCHGADGS  | Negative |
| P04032 | AVSGVAADGAALYKSCIGCH  | Negative |
| P04032 | ALYKSCIGCHGADGSKAAMG  | Negative |
| P04032 | DGAALYKSCIGCHGADGSKA  | Negative |
| P04032 | ADGAALYKSCIGCHGADGSK  | Negative |
| P04032 | RVLLLSSLCAALSFGGLAVSG | Negative |
| P04032 | AALYKSCIGCHGADGSKAAM  | Negative |
| P04032 | LAVSGVAADGAALYKSCIGC  | Negative |
| P04032 | SGVAADGAALYKSCIGCHGA  | Negative |
| P04032 | VLLLSSLCAALSFGGLAVSGV | Negative |
| P04032 | VSGVAADGAALYKSCIGCHG  | Negative |
| P04032 | ALSFGGLAVSGVAADGAALYK | Negative |
| P04032 | SSLCAALSFGGLAVSGVAADG | Negative |
| P04032 | LSFGGLAVSGVAADGAALYKS | Negative |
| P04032 | LYKSCIGCHGADGSKAAMGS  | Negative |
| P04032 | KRVLLLSSLCAALSFGGLAVS | Negative |
| P04032 | LSSLCAALSFGGLAVSGVAAD | Negative |
| P04032 | GAALYKSCIGCHGADGSKAA  | Negative |
| P04032 | VAADGAALYKSCIGCHGADG  | Negative |
| P04032 | GLAVSGVAADGAALYKSCIG  | Negative |
| P04032 | CAALSFGGLAVSGVAADGAAL | Negative |
| P04032 | SLCAALSFGGLAVSGVAADGA | Negative |

|        |                      |          |
|--------|----------------------|----------|
| P04032 | LLSSLCAALSFGLAVSGVAA | Negative |
| P04032 | LLLSSLCAALSFGLAVSGVA | Negative |
| P04032 | MKRVLLLSSLCAALSFGLAV | Negative |
| P04058 | VTSSLGVLLHLVVLCQADDH | Negative |
| P04058 | ADDHSELLVNTKSGKVMGTR | Negative |
| P04058 | SELLVNTKSGKVMGTRVPVL | Negative |
| P04058 | LLVTSSLGVLLHLVVLCQAD | Negative |
| P04058 | LLHLVVLCQADDHSELLVNT | Negative |
| P04058 | LCQADDHSELLVNTKSGKVM | Negative |
| P04058 | TSSLGVLLHLVVLCQADDHS | Negative |
| P04058 | ELLVNTKSGKVMGTRVPVLS | Negative |
| P04058 | GVLLHLVVLCQADDHSELLV | Negative |
| P04058 | LHLVVLCQADDHSELLVNTK | Negative |
| P04058 | MNLLVTSSLGVLLHLVVLCQ | Negative |
| P04058 | VNTKSGKVMGTRVPVLSSHI | Negative |
| P04058 | CQADDHSELLVNTKSGKVMG | Negative |
| P04058 | LVVLCQADDHSELLVNTKSG | Negative |
| P04058 | LLVNTKSGKVMGTRVPVLSS | Negative |
| P04058 | DHSELLVNTKSGKVMGTRVP | Negative |
| P04058 | SLGVLLHLVVLCQADDHSEL | Negative |
| P04058 | NTKSGKVMGTRVPVLSSHIS | Negative |
| P04058 | DDHSELLVNTKSGKVMGTRV | Negative |
| P04058 | QADDHSELLVNTKSGKVMGT | Negative |
| P04058 | VLLHLVVLCQADDHSELLVN | Negative |
| P04058 | VLCQADDHSELLVNTKSGKV | Negative |
| P04058 | NLLVTSSLGVLLHLVVLCQA | Negative |
| P04058 | LVNTKSGKVMGTRVPVLSSH | Negative |
| P04058 | LGVLLHLVVLCQADDHSELL | Negative |
| P04058 | HLVVLCQADDHSELLVNTKS | Negative |
| P04058 | LVTSSLGVLLHLVVLCQADD | Negative |
| P04058 | HSELLVNTKSGKVMGTRVPV | Negative |
| P04058 | VVLCQADDHSELLVNTKSGK | Negative |
| P04062 | KPLSRVSIMAGSLTGLLLLQ | Negative |
| P04062 | IMAGSLTGLLLLQAVSWASG | Negative |
| P04062 | VSIMAGSLTGLLLLQAVSWA | Negative |
| P04062 | FSSPSREECPKPLSRVSIMA | Negative |
| P04062 | ECPKPLSRVSIMAGSLTGLL | Negative |
| P04062 | PLSRVSIMAGSLTGLLLLQA | Negative |
| P04062 | LLLQAVSWASGARPCIPKSF | Negative |
| P04062 | SREECPKPLSRVSIMAGSLT | Negative |
| P04062 | REECPKPLSRVSIMAGSLTG | Negative |
| P04062 | MEFSSPSREECPKPLSRVSI | Negative |
| P04062 | SPSREECPKPLSRVSIMAGS | Negative |
| P04062 | LLLQAVSWASGARPCIPKS  | Negative |
| P04062 | RVSIMAGSLTGLLLLQAVSW | Negative |
| P04062 | GLLLQAVSWASGARPCIPK  | Negative |



|        |                      |          |
|--------|----------------------|----------|
| P04062 | LLQAVSWASGARPCIPKSFG | Negative |
| P04062 | LSRVSIMAGSLTGLLLLQAV | Negative |
| P04062 | SLTGLLLLQAVSWASGARPC | Negative |
| P04062 | PSREECPKPLSRVSIMAGSL | Negative |
| P04062 | MAGSLTGLLLLQAVSWASGA | Negative |
| P04062 | PKPLSRVSIMAGSLTGLLLL | Negative |
| P04062 | SIMAGSLTGLLLLQAVSWAS | Negative |
| P04062 | SSPSREECPKPLSRVSIMAG | Negative |
| P04062 | EFSSPSREECPKPLSRVSIM | Negative |
| P04062 | AGSLTGLLLLQAVSWASGAR | Negative |
| P04062 | SRVSIMAGSLTGLLLLQAVS | Negative |
| P04062 | GSLTGLLLLQAVSWASGARP | Negative |
| P04062 | CPKPLSRVSIMAGSLTGLLL | Negative |
| P04062 | TGLLLLQAVSWASGARPCIP | Negative |
| P04062 | EECPKPLSRVSIMAGSLTGL | Negative |
| P04067 | ALVLGSTAASGASATPSPAP | Negative |
| P04067 | VRRRVRTAALALSAAAALVL | Negative |
| P04067 | GSTAASGASATPSPAPAPAP | Negative |
| P04067 | VRTAALALSAAAALVLGSTA | Negative |
| P04067 | ASGASATPSPAPAPAPAPVK | Negative |
| P04067 | VLGSTAASGASATPSPAPAP | Negative |
| P04067 | MFTPVRRRVRTAALALSAAA | Negative |
| P04067 | ALSAAAALVLGSTAASGASA | Negative |
| P04067 | TPVRRRVRTAALALSAAAAL | Negative |
| P04067 | AALVLGSTAASGASATPSPA | Negative |
| P04067 | SAAAALVLGSTAASGASATP | Negative |
| P04067 | LALSAAAALVLGSTAASGAS | Negative |
| P04067 | RRRVRTAALALSAAAALVLG | Negative |
| P04067 | STAASGASATPSPAPAPAPA | Negative |
| P04067 | AALALSAAAALVLGSTAASG | Negative |
| P04067 | AAAALVLGSTAASGASATPS | Negative |
| P04067 | AAALVLGSTAASGASATPSP | Negative |
| P04067 | TAASGASATPSPAPAPAPAP | Negative |
| P04067 | ALALSAAAALVLGSTAASGA | Negative |
| P04067 | LSAAAALVLGSTAASGASAT | Negative |
| P04067 | LGSTAASGASATPSPAPAPA | Negative |
| P04067 | TAALALSAAAALVLGSTAAS | Negative |
| P04067 | RTAALALSAAAALVLGSTAA | Negative |
| P04067 | PVRRRVRTAALALSAAAALV | Negative |
| P04067 | LVLGSTAASGASATPSPAPA | Negative |
| P04067 | RRVRTAALALSAAAALVLGS | Negative |
| P04067 | RVRTAALALSAAAALVLGST | Negative |
| P04067 | FTPVRRRVRTAALALSAAA  | Negative |
| P04067 | SGASATPSPAPAPAPAPVKQ | Negative |
| P04073 | LLEASLLRVPLRKMKSIRET | Negative |
| P04073 | EASLLRVPLRKMKSIRETMK | Negative |

|        |                      |          |
|--------|----------------------|----------|
| P04073 | RVPLRKMKSIRETMKEQGV  | Negative |
| P04073 | RKMKSIRETMKEQGVLD    | Negative |
| P04073 | KMKSIRETMKEQGVLD     | Negative |
| P04073 | ALLCLPLLEASLLRVPLRKM | Negative |
| P04073 | LPLLEASLLRVPLRKMKSIR | Negative |
| P04073 | LRKMKSIRETMKEQGVLD   | Negative |
| P04073 | MKSIRETMKEQGVLD      | Negative |
| P04073 | WMVVALLCLPLLEASLLRV  | Negative |
| P04073 | LLRVPLRKMKSIRETMKEQ  | Negative |
| P04073 | VALLCLPLLEASLLRVPLRK | Negative |
| P04073 | VPLRKMKSIRETMKEQGV   | Negative |
| P04073 | IRETMKEQGVLD         | Negative |
| P04073 | LCLPLLEASLLRVPLRKMKS | Negative |
| P04073 | MVVALLCLPLLEASLLRV   | Negative |
| P04073 | KSIRETMKEQGVLD       | Negative |
| P04073 | PLLEASLLRVPLRKMKSIRE | Negative |
| P04073 | CLPLLEASLLRVPLRKMKS  | Negative |
| P04073 | SLLRVPLRKMKSIRETMKE  | Negative |
| P04073 | PLRKMKSIRETMKEQGV    | Negative |
| P04073 | MKWMVVALLCLPLLEASLL  | Negative |
| P04073 | RETMKEQGVLD          | Negative |
| P04073 | LEASLLRVPLRKMKSIRE   | Negative |
| P04073 | SIRETMKEQGVLD        | Negative |
| P04073 | ASLLRVPLRKMKSIRE     | Negative |
| P04073 | LRVPLRKMKSIRETMKE    | Negative |
| P04073 | LLCLPLLEASLLRVPLRKM  | Negative |
| P04073 | VVALLCLPLLEASLLRV    | Negative |
| P04090 | LLNQFSRAVADSWMEEVI   | Negative |
| P04090 | LNQFSRAVADSWMEEVI    | Negative |
| P04090 | GVCLLLNQFSRAVADSW    | Negative |
| P04090 | QFSRAVADSWMEEVI      | Negative |
| P04090 | SWMEEVIKCGREL        | Negative |
| P04090 | FHLLGVCLLLNQFSRAV    | Negative |
| P04090 | EEVIKCGREL           | Negative |
| P04090 | RAVADSWMEEVIKCGREL   | Negative |
| P04090 | CLLLNQFSRAVADSW      | Negative |
| P04090 | LLLNQFSRAVADSW       | Negative |
| P04090 | LFFFHLLGVCLLLNQFS    | Negative |
| P04090 | PRLFFFHLLGVCLLLNQ    | Negative |
| P04090 | FSRAVADSWMEEVIKCG    | Negative |
| P04090 | DSWMEEVIKCGREL       | Negative |
| P04090 | AVADSWMEEVIKCGREL    | Negative |
| P04090 | NQFSRAVADSWMEEVI     | Negative |
| P04090 | SRAVADSWMEEVIKCG     | Negative |
| P04090 | ADSWMEEVIKCGREL      | Negative |
| P04090 | VCLLLNQFSRAVADSW     | Negative |

|        |                       |          |
|--------|-----------------------|----------|
| P04090 | FFHLLGVCLLLNQFSRAVAD  | Negative |
| P04090 | MPRLFFFHLLGVCLLLNQFS  | Negative |
| P04090 | LLGVCLLLNQFSRAVADSWM  | Negative |
| P04090 | FFFHLLGVCLLLNQFSRAVA  | Negative |
| P04090 | EVIKLCGREL VRAQIAICGM | Negative |
| P04090 | RLFFFHLLGVCLLLNQFSRA  | Negative |
| P04090 | VADSWMEEVIKLCGREL VRA | Negative |
| P04090 | WMEEVIKLCGREL VRAQIAI | Negative |
| P04090 | HLLGVCLLLNQFSRAVADSW  | Negative |
| P04090 | MEEVIKLCGREL VRAQIAIC | Negative |
| P04119 | RCLLLTLGLALLCGVQAVEV  | Negative |
| P04119 | CGVQAVEVTPIMTELDTQKV  | Negative |
| P04119 | VEVTPIMTELDTQKVAGTWH  | Negative |
| P04119 | ELDTQKVAGTWHTVAMAVSD  | Negative |
| P04119 | QAVEVTPIMTELDTQKVAGT  | Negative |
| P04119 | LTLGLALLCGVQAVEVTPIM  | Negative |
| P04119 | TELDTQKVAGTWHTVAMAVS  | Negative |
| P04119 | PIMTELDTQKVAGTWHTVAM  | Negative |
| P04119 | LCGVQAVEVTPIMTELDTQK  | Negative |
| P04119 | TLGLALLCGVQAVEVTPIMT  | Negative |
| P04119 | MRCLLLTLGLALLCGVQAVE  | Negative |
| P04119 | CLLLTLGLALLCGVQAVEVT  | Negative |
| P04119 | ALLCGVQAVEVTPIMTELDT  | Negative |
| P04119 | IMTELDTQKVAGTWHTVAMA  | Negative |
| P04119 | LALLCGVQAVEVTPIMTELD  | Negative |
| P04119 | MTELDTQKVAGTWHTVAMAV  | Negative |
| P04119 | VQAVEVTPIMTELDTQKVAG  | Negative |
| P04119 | LLTLGLALLCGVQAVEVTPI  | Negative |
| P04119 | LDTQKVAGTWHTVAMAVSDV  | Negative |
| P04119 | EVTPIMTELDTQKVAGTWHT  | Negative |
| P04119 | GLALLCGVQAVEVTPIMTEL  | Negative |
| P04119 | GVQAVEVTPIMTELDTQKVA  | Negative |
| P04119 | DTQKVAGTWHTVAMAVSDVS  | Negative |
| P04119 | VTPIMTELDTQKVAGTWHTV  | Negative |
| P04119 | LGLALLCGVQAVEVTPIMTE  | Negative |
| P04119 | LLCGVQAVEVTPIMTELDTQ  | Negative |
| P04119 | AVEVTPIMTELDTQKVAGTW  | Negative |
| P04119 | TQKVAGTWHTVAMAVSDVSL  | Negative |
| P04119 | TPIMTELDTQKVAGTWHTVA  | Negative |
| P04148 | YLDDYKCISDHLAANSKCIP  | Negative |
| P04148 | DDYKCISDHLAANSKCIPGR  | Negative |
| P04148 | CYLDDYKCISDHLAANSKCI  | Negative |
| P04148 | VAVLASAGPPSPIYRPCYLD  | Negative |
| P04148 | PSPIYRPCYLDDYKCISDHL  | Negative |
| P04148 | AVAVLASAGPPSPIYRPCYL  | Negative |
| P04148 | ARCLAVAAVAVLASAGPPSP  | Negative |

|        |                      |          |
|--------|----------------------|----------|
| P04148 | LASAGPPSPIYRPCYLDDYK | Negative |
| P04148 | RPCYLDDYKCISDHLAANSK | Negative |
| P04148 | ASAGPPSPIYRPCYLDDYKC | Negative |
| P04148 | LDDYKCISDHLAANSKCIPG | Negative |
| P04148 | PCYLDDYKCISDHLAANSKC | Negative |
| P04148 | PPSPIYRPCYLDDYKCISDH | Negative |
| P04148 | CLAVAAVAVLASAGPPSPIY | Negative |
| P04148 | MLARCLAVAAVAVLASAGPP | Negative |
| P04148 | GPPSPIYRPCYLDDYKCISD | Negative |
| P04148 | SPIYRPCYLDDYKCISDHLA | Negative |
| P04148 | LAVAAVAVLASAGPPSPIYR | Negative |
| P04148 | AAVAVLASAGPPSPIYRPCY | Negative |
| P04148 | AVLASAGPPSPIYRPCYLDD | Negative |
| P04148 | VAAVAVLASAGPPSPIYRPC | Negative |
| P04148 | IYRPCYLDDYKCISDHLAAN | Negative |
| P04148 | AGPPSPIYRPCYLDDYKCIS | Negative |
| P04148 | RCLAVAAVAVLASAGPPSPI | Negative |
| P04148 | AVAAVAVLASAGPPSPIYRP | Negative |
| P04148 | YRPCYLDDYKCISDHLAANS | Negative |
| P04148 | SAGPPSPIYRPCYLDDYKCI | Negative |
| P04148 | PIYRPCYLDDYKCISDHLAA | Negative |
| P04148 | VLASAGPPSPIYRPCYLDDY | Negative |
| P04155 | VLVSMLALGTLAEAQTETCT | Negative |
| P04155 | SMLALGTLAEAQTETCTVAP | Negative |
| P04155 | GTLAEAQTETCTVAPRERQN | Negative |
| P04155 | ALVLVSMLALGTLAEAQTET | Negative |
| P04155 | LAEAQTETCTVAPRERQNCG | Negative |
| P04155 | EAQTETCTVAPRERQNCGFP | Negative |
| P04155 | LGTLAEAQTETCTVAPRERQ | Negative |
| P04155 | LVLVSMLALGTLAEAQTETC | Negative |
| P04155 | ICALVLVSMLALGTLAEAQT | Negative |
| P04155 | LALGTLAEAQTETCTVAPRE | Negative |
| P04155 | MATMENKVICALVLVSMLAL | Negative |
| P04155 | MLALGTLAEAQTETCTVAPR | Negative |
| P04155 | TETCTVAPRERQNCGFPGVT | Negative |
| P04155 | ALGTLAEAQTETCTVAPRER | Negative |
| P04155 | AEAQTETCTVAPRERQNCGF | Negative |
| P04155 | KVICALVLVSMLALGTLAEA | Negative |
| P04155 | TCTVAPRERQNCGFPGVTPS | Negative |
| P04155 | VICALVLVSMLALGTLAEAQ | Negative |
| P04155 | ETCTVAPRERQNCGFPGVTP | Negative |
| P04155 | MENKVICALVLVSMLALGTL | Negative |
| P04155 | NKVICALVLVSMLALGTLAE | Negative |
| P04155 | LVSMALGTLAEAQTETCTV  | Negative |
| P04155 | VSMALGTLAEAQTETCTVA  | Negative |
| P04155 | QTETCTVAPRERQNCGFPGV | Negative |

|        |                      |          |
|--------|----------------------|----------|
| P04155 | AQTETCTVAPRERQNCGFPG | Negative |
| P04155 | TMENKVICALVLVSMLALGT | Negative |
| P04155 | TLAEAQTETCTVAPRERQNC | Negative |
| P04155 | ATMENKVICALVLVSMLALG | Negative |
| P04155 | ENKVICALVLVSMLALGTLA | Negative |
| P04171 | IAAATLAIAIATTLPAAADE | Negative |
| P04171 | ADEVAVKMLNSGPGGMMVFD | Negative |
| P04171 | VKMLNSGPGGMMVFDPALVR | Negative |
| P04171 | PAAADEVAVKMLNSGPGGMM | Negative |
| P04171 | MIFRALIAAATLAIAIATTL | Negative |
| P04171 | DEVAVKMLNSGPGGMMVFDP | Negative |
| P04171 | FRALIAAATLAIAIATTLPA | Negative |
| P04171 | TLAIAIATTLPAAADEVAVK | Negative |
| P04171 | IATTLPAAADEVAVKMLNSG | Negative |
| P04171 | TLPAAADEVAVKMLNSGPGG | Negative |
| P04171 | ALIAAATLAIAIATTLPAAA | Negative |
| P04171 | MMIFRALIAAATLAIAIATT | Negative |
| P04171 | AVKMLNSGPGGMMVFDPALV | Negative |
| P04171 | AAATLAIAIATTLPAAADEV | Negative |
| P04171 | IFRALIAAATLAIAIATTLP | Negative |
| P04171 | RALIAAATLAIAIATTLPAA | Negative |
| P04171 | LIAAATLAIAIATTLPAAAD | Negative |
| P04171 | IAIATTLPAAADEVAVKMLN | Negative |
| P04171 | TTLPAAADEVAVKMLNSGPG | Negative |
| P04171 | EVAVKMLNSGPGGMMVFDPA | Negative |
| P04171 | AIAIATTLPAAADEVAVKML | Negative |
| P04171 | AAADEVAVKMLNSGPGGMMV | Negative |
| P04171 | AADEVAVKMLNSGPGGMMVF | Negative |
| P04171 | VAVKMLNSGPGGMMVFDPAL | Negative |
| P04171 | LPAAADEVAVKMLNSGPGGM | Negative |
| P04171 | LAIAIATTLPAAADEVAVKM | Negative |
| P04171 | AIATTLPAAADEVAVKMLNS | Negative |
| P04171 | ATTLPAAADEVAVKMLNSGP | Negative |
| P04171 | AATLAIAIATTLPAAADEVA | Negative |
| P04172 | TAALAAGALEAVQEAPAGST | Negative |
| P04172 | EAVQEAPAGSTEVKIAKMKF | Negative |
| P04172 | LAAGALEAVQEAPAGSTEVK | Negative |
| P04172 | LAAFSATAALAAGALEAVQE | Negative |
| P04172 | AAFSATAALAAGALEAVQEA | Negative |
| P04172 | QEAPAGSTEVKIAKMKFQTP | Negative |
| P04172 | SATAALAAGALEAVQEAPAG | Negative |
| P04172 | AGALEAVQEAPAGSTEVKIA | Negative |
| P04172 | LEAVQEAPAGSTEVKIAKMK | Negative |
| P04172 | LAFAAALAAFSATAALAAGA | Negative |
| P04172 | GALEAVQEAPAGSTEVKIAK | Negative |
| P04172 | AFAAALAAFSATAALAAGAL | Negative |

|        |                      |          |
|--------|----------------------|----------|
| P04172 | AAGALEAVQEAPAGSTEVKI | Negative |
| P04172 | AALAAGALEAVQEAPAGSTE | Negative |
| P04172 | FSATAALAAGALEAVQEAPA | Negative |
| P04172 | AFSATAALAAGALEAVQEAP | Negative |
| P04172 | AALAAFSATAALAAGALEAV | Negative |
| P04172 | ALAAGALEAVQEAPAGSTEV | Negative |
| P04172 | ATAALAAGALEAVQEAPAGS | Negative |
| P04172 | ALEAVQEAPAGSTEVKIAKM | Negative |
| P04172 | ALAAFSATAALAAGALEAVQ | Negative |
| P04172 | AAALAAFSATAALAAGALEA | Negative |
| P04172 | RALAFAAALAAFSATAALAA | Negative |
| P04172 | ALAFAAALAAFSATAALAAG | Negative |
| P04172 | APAGSTEVKIAKMKFQTPEV | Negative |
| P04172 | VQEAPAGSTEVKIAKMKFQT | Negative |
| P04172 | EAPAGSTEVKIAKMKFQTPE | Negative |
| P04172 | AVQEAPAGSTEVKIAKMKFQ | Negative |
| P04172 | MRALAFAAALAAFSATAALA | Negative |
| P04180 | AAPFWLLNVLFPPHTTPKAE | Negative |
| P04180 | NVLFPPHTTPKAELSNHTRP | Negative |
| P04180 | WQWVTLLLGLLLPPAAPFWL | Negative |
| P04180 | GLLLPPAAPFWLLNVLFPPH | Negative |
| P04180 | QWVTLLLGLLLPPAAPFWLL | Negative |
| P04180 | LNVLFPHTTPKAELSNHTR  | Negative |
| P04180 | WLLNVLFPPHTTPKAELSNH | Negative |
| P04180 | APFWLLNVLFPPHTTPKAEL | Negative |
| P04180 | MGPPGSPWQWVTLLLGLLLP | Negative |
| P04180 | LLPPAAPFWLLNVLFPPHTT | Negative |
| P04180 | PGSPWQWVTLLLGLLLPPAA | Negative |
| P04180 | SPWQWVTLLLGLLLPPAAPF | Negative |
| P04180 | GSPWQWVTLLLGLLLPPAAP | Negative |
| P04180 | FWLLNVLFPPHTTPKAELSN | Negative |
| P04180 | GPPGSPWQWVTLLLGLLLPP | Negative |
| P04180 | PWQWVTLLLGLLLPPAAPFW | Negative |
| P04180 | LLLGLLLPPAAPFWLLNVLF | Negative |
| P04180 | LLPPAAPFWLLNVLFPPHT  | Negative |
| P04180 | TLLLGLLLPPAAPFWLLNVL | Negative |
| P04180 | LGLLLPPAAPFWLLNVLFPP | Negative |
| P04180 | VLFPHTTPKAELSNHTRPV  | Negative |
| P04180 | PAAPFWLLNVLFPPHTTPKA | Negative |
| P04180 | LPPAAPFWLLNVLFPPHTTP | Negative |
| P04180 | LLGLLLPPAAPFWLLNVLP  | Negative |
| P04180 | PFWLLNVLFPPHTTPKAELS | Negative |
| P04180 | LLNVLFPPHTTPKAELSNHT | Negative |
| P04180 | PPAAPFWLLNVLFPPHTTPK | Negative |
| P04180 | PPGSPWQWVTLLLGLLLPPA | Negative |
| P04180 | VTLLLGLLLPPAAPFWLLNV | Negative |

|        |                      |          |
|--------|----------------------|----------|
| P04189 | MAFSNMSAQAAGKSSTEKKY | Negative |
| P04189 | AAGKSSTEKKYIVGFKQTMS | Negative |
| P04189 | LIFTMAFSNMSAQAAGKSST | Negative |
| P04189 | LWISLLFALTLIFTMAFSNM | Negative |
| P04189 | LLFALTLIFTMAFSNMSAQA | Negative |
| P04189 | ALTLIFTMAFSNMSAQAAGK | Negative |
| P04189 | KKLWISLLFALTLIFTMAFS | Negative |
| P04189 | FSNMSAQAAGKSSTEKKYIV | Negative |
| P04189 | SLLFALTLIFTMAFSNMSAQ | Negative |
| P04189 | ISLLFALTLIFTMAFSNMSA | Negative |
| P04189 | FTMAFSNMSAQAAGKSSTEK | Negative |
| P04189 | SAQAAGKSSTEKKYIVGFKQ | Negative |
| P04189 | MSAQAAGKSSTEKKYIVGFK | Negative |
| P04189 | AFSNMSAQAAGKSSTEKKYI | Negative |
| P04189 | QAAGKSSTEKKYIVGFKQTM | Negative |
| P04189 | FALTLIFTMAFSNMSAQAAG | Negative |
| P04189 | AGKSSTEKKYIVGFKQTMSA | Negative |
| P04189 | TMAFSNMSAQAAGKSSTEKK | Negative |
| P04189 | LTLIFTMAFSNMSAQAAGKS | Negative |
| P04189 | AQAAGKSSTEKKYIVGFKQT | Negative |
| P04189 | NMSAQAAGKSSTEKKYIVGF | Negative |
| P04189 | KLWISLLFALTLIFTMAFSN | Negative |
| P04189 | MRSKKLWISLLFALTLIFTM | Negative |
| P04189 | LFALTLIFTMAFSNMSAQA  | Negative |
| P04189 | IFTMAFSNMSAQAAGKSSTE | Negative |
| P04189 | SNMSAQAAGKSSTEKKYIVG | Negative |
| P04189 | WISLLFALTLIFTMAFSNMS | Negative |
| P04189 | RSKKLWISLLFALTLIFTMA | Negative |
| P04189 | SKKLWISLLFALTLIFTMAF | Negative |
| P04190 | KKNTLLKVGLCVGLLGTIQF | Negative |
| P04190 | MKKNTLLKVGLCVGLLGTIQ | Negative |
| P04190 | NTLLKVGLCVGLLGTIQFVS | Negative |
| P04190 | GLLGTIQFVSTISSVQASQK | Negative |
| P04190 | FVSTISSVQASQKVEKTVIK | Negative |
| P04190 | VGLCVGLLGTIQFVSTISSV | Negative |
| P04190 | ASQKVEKTVIKNETGTISIS | Negative |
| P04190 | QASQKVEKTVIKNETGTISI | Negative |
| P04190 | STISSVQASQKVEKTVIKNE | Negative |
| P04190 | SSVQASQKVEKTVIKNETGT | Negative |
| P04190 | ISSVQASQKVEKTVIKNETG | Negative |
| P04190 | TLLKVGLCVGLLGTIQFVST | Negative |
| P04190 | GTIQFVSTISSVQASQKVEK | Negative |
| P04190 | VGLLGTIQFVSTISSVQASQ | Negative |
| P04190 | LCVGLLGTIQFVSTISSVQA | Negative |
| P04190 | GLCVGLLGTIQFVSTISSVQ | Negative |
| P04190 | VQASQKVEKTVIKNETGTIS | Negative |

|        |                      |          |
|--------|----------------------|----------|
| P04190 | LLKVGLCVGLLGTIQFVSTI | Negative |
| P04190 | SVQASQKVEKTVIKNETGTI | Negative |
| P04190 | VSTISSVQASQKVEKTVIKN | Negative |
| P04190 | KVGLCVGLLGTIQFVSTISS | Negative |
| P04190 | CVGLLGTIQFVSTISSVQAS | Negative |
| P04190 | KNTLLKVGLCVGLLGTIQFV | Negative |
| P04190 | LKVGLCVGLLGTIQFVSTIS | Negative |
| P04190 | LLGTIQFVSTISSVQASQKV | Negative |
| P04190 | TIQFVSTISSVQASQKVEKT | Negative |
| P04190 | IQFVSTISSVQASQKVEKTV | Negative |
| P04190 | QFVSTISSVQASQKVEKTVI | Negative |
| P04190 | TISSVQASQKVEKTVIKNET | Negative |
| P04196 | ITLQYSCAVSPTDCSAVEPE | Negative |
| P04196 | CSAVEPEAEKALDLINKRRR | Negative |
| P04196 | EPEAEKALDLINKRRRDGYL | Negative |
| P04196 | YSCAVSPTDCSAVEPEAEKA | Negative |
| P04196 | ALIAALLLITLQYSCAVSPT | Negative |
| P04196 | CAVSPTDCSAVEPEAEKALD | Negative |
| P04196 | SAVEPEAEKALDLINKRRRD | Negative |
| P04196 | IAALLLITLQYSCAVSPTDC | Negative |
| P04196 | TDCSAVEPEAEKALDLINKR | Negative |
| P04196 | AALLLITLQYSCAVSPTDCS | Negative |
| P04196 | VEPEAEKALDLINKRRRDGY | Negative |
| P04196 | PEAEKALDLINKRRRDGYLF | Negative |
| P04196 | LLLITLQYSCAVSPTDCSAV | Negative |
| P04196 | AVEPEAEKALDLINKRRRDG | Negative |
| P04196 | ALLLITLQYSCAVSPTDCSA | Negative |
| P04196 | AVSPTDCSAVEPEAEKALDL | Negative |
| P04196 | MKALIAALLLITLQYSCAVS | Negative |
| P04196 | KALIAALLLITLQYSCAVSP | Negative |
| P04196 | PTDCSAVEPEAEKALDLINK | Negative |
| P04196 | QYSCAVSPTDCSAVEPEAEK | Negative |
| P04196 | LITLQYSCAVSPTDCSAVEP | Negative |
| P04196 | DCSAVEPEAEKALDLINKRR | Negative |
| P04196 | VSPTDCSAVEPEAEKALDLI | Negative |
| P04196 | EAEKALDLINKRRRDGYLFQ | Negative |
| P04196 | SCAVSPTDCSAVEPEAEKAL | Negative |
| P04196 | LLITLQYSCAVSPTDCSAVE | Negative |
| P04196 | SPTDCSAVEPEAEKALDLIN | Negative |
| P04196 | LQYSCAVSPTDCSAVEPEAE | Negative |
| P04196 | TLQYSCAVSPTDCSAVEPEA | Negative |
| P04217 | LLWGVTWGPVTEAAIFYETQ | Negative |
| P04217 | MSMLVVFLLLWGVTWGPVTE | Negative |
| P04217 | YETQPSLWAESESLKPLAN  | Negative |
| P04217 | WGVTWGPVTEAAIFYETQPS | Negative |
| P04217 | LLLWGVTWGPVTEAAIFYET | Negative |



|        |                      |          |
|--------|----------------------|----------|
| P04217 | AAIFYETQPSLWAESESLK  | Negative |
| P04217 | EAAIFYETQPSLWAESESL  | Negative |
| P04217 | SLWAESESLKPLANVTLC   | Negative |
| P04217 | VFLLLWGVTWGPVTEAAIFY | Negative |
| P04217 | ETQPSLWAESESLKPLANV  | Negative |
| P04217 | AIFYETQPSLWAESESLKP  | Negative |
| P04217 | SMLVVFLLLWGVTWGPVTEA | Negative |
| P04217 | LVVFLLLWGVTWGPVTEAAI | Negative |
| P04217 | FYETQPSLWAESESLKPLA  | Negative |
| P04217 | TQPSLWAESESLKPLANVT  | Negative |
| P04217 | IFYETQPSLWAESESLKPL  | Negative |
| P04217 | VTWGPVTEAAIFYETQPSLW | Negative |
| P04217 | TEAAIFYETQPSLWAEESL  | Negative |
| P04217 | GVTWGPVTEAAIFYETQPSL | Negative |
| P04217 | PSLWAESESLKPLANVTLT  | Negative |
| P04217 | VTEAAIFYETQPSLWAESES | Negative |
| P04217 | QPSLWAESESLKPLANVTL  | Negative |
| P04217 | TWGPVTEAAIFYETQPSLWA | Negative |
| P04217 | GPVTEAAIFYETQPSLWAE  | Negative |
| P04217 | MLVVFLLLWGVTWGPVTEAA | Negative |
| P04217 | PVTEAAIFYETQPSLWAESE | Negative |
| P04217 | LWGVTWGPVTEAAIFYETQP | Negative |
| P04217 | VVFLLLWGVTWGPVTEAAIF | Negative |
| P04217 | WGPVTEAAIFYETQPSLWAE | Negative |
| P04275 | IPARFAGVLLALALILPGTL | Negative |
| P04275 | GTLCAEGTRGRSSTARCSLF | Negative |
| P04275 | ILPGTLCAEGTRGRSSTARC | Negative |
| P04275 | TLCAEGTRGRSSTARCSLFG | Negative |
| P04275 | ARFAGVLLALALILPGTLCA | Negative |
| P04275 | LLALALILPGTLCAEGTRGR | Negative |
| P04275 | LILPGTLCAEGTRGRSSTAR | Negative |
| P04275 | RGRSSTARCSLFGSDFVNTF | Negative |
| P04275 | GTRGRSSTARCSLFGSDFVN | Negative |
| P04275 | RFAGVLLALALILPGTLCAE | Negative |
| P04275 | LALALILPGTLCAEGTRGRS | Negative |
| P04275 | FAGVLLALALILPGTLCAEG | Negative |
| P04275 | EGTRGRSSTARCSLFGSDFV | Negative |
| P04275 | LPGTLCAEGTRGRSSTARCS | Negative |
| P04275 | CAEGTRGRSSTARCSLFGSD | Negative |
| P04275 | AGVLLALALILPGTLCAEGT | Negative |
| P04275 | VLLALALILPGTLCAEGTRG | Negative |
| P04275 | ALILPGTLCAEGTRGRSSTA | Negative |
| P04275 | MIPARFAGVLLALALILPGT | Negative |
| P04275 | LALILPGTLCAEGTRGRSST | Negative |
| P04275 | LCAEGTRGRSSTARCSLFGS | Negative |
| P04275 | ALALILPGTLCAEGTRGRSS | Negative |

|        |                       |          |
|--------|-----------------------|----------|
| P04275 | RSSTARCSLFGSDFVNTFDG  | Negative |
| P04275 | AEGTRGRSSTARCSLFGSDF  | Negative |
| P04275 | SSTARCSLFGSDFVNTFDGS  | Negative |
| P04275 | PGTLCAEGTRGRSSTARCSL  | Negative |
| P04275 | GRSSTARCSLFGSDFVNTFD  | Negative |
| P04275 | TRGRSSTARCSLFGSDFVNT  | Negative |
| P04275 | PARFAGVLLALALILPGTLC  | Negative |
| P04278 | LLLRHTRQGWALRPVLPTQS  | Negative |
| P04278 | TSRLLLLLLLLLLLRHTRQGW | Negative |
| P04278 | LLRHTRQGWALRPVLPTQSA  | Negative |
| P04278 | TRQGWALRPVLPTQSAHDPP  | Negative |
| P04278 | LLLLLLLLLLLRHTRQGWALR | Negative |
| P04278 | LATSRLLLLLLLLLLRHTRQ  | Negative |
| P04278 | SRGPLATSRLLLLLLLLLLR  | Negative |
| P04278 | RLLLLLLLLLLLRHTRQGWAL | Negative |
| P04278 | PLATSRLLLLLLLLLLRHTR  | Negative |
| P04278 | LLLLLRHTRQGWALRPVLP   | Negative |
| P04278 | ATSRLLLLLLLLLLRHTRQG  | Negative |
| P04278 | ALRPVLPTQSAHDPPAVHLS  | Negative |
| P04278 | MESRGPLATSRLLLLLLLLL  | Negative |
| P04278 | HTRQGWALRPVLPTQSAHDP  | Negative |
| P04278 | LLLLRHTRQGWALRPVLPTQ  | Negative |
| P04278 | RHTRQGWALRPVLPTQSAHD  | Negative |
| P04278 | RGPLATSRLLLLLLLLLLRH  | Negative |
| P04278 | LRHTRQGWALRPVLPTQSAH  | Negative |
| P04278 | GPLATSRLLLLLLLLLLRHT  | Negative |
| P04278 | ESRGPLATSRLLLLLLLLL   | Negative |
| P04278 | SRLLLLLLLLLLLRHTRQGWA | Negative |
| P04278 | QGWALRPVLPTQSAHDPPAV  | Negative |
| P04278 | WALRPVLPTQSAHDPPAVHL  | Negative |
| P04278 | LLLLLLLLLRHTRQGWALRP  | Negative |
| P04278 | GWALRPVLPTQSAHDPPAVH  | Negative |
| P04278 | LRPVLPTQSAHDPPAVHLSN  | Negative |
| P04278 | RQGWALRPVLPTQSAHDPPA  | Negative |
| P04278 | LLLLLRHTRQGWALRPVLPT  | Negative |
| P04278 | LLLLLLLLLRHTRQGWALRPV | Negative |
| P04280 | ILLSVALLALSSAQNLNEDV  | Negative |
| P04280 | SVALLALSSAQNLNEDVSQE  | Negative |
| P04280 | LNEDVSQEEPSLIAGNPQG   | Negative |
| P04280 | ESPSLIAGNPQGSPQGGNK   | Negative |
| P04280 | DVSQEEPSLIAGNPQGSP    | Negative |
| P04280 | VALLALSSAQNLNEDVSQEE  | Negative |
| P04280 | LILLSVALLALSSAQNLNED  | Negative |
| P04280 | EESPSLIAGNPQGSPQGGN   | Negative |
| P04280 | PSLIAGNPQGSPQGGNKPQ   | Negative |
| P04280 | NLNEDVSQEEPSLIAGNPQ   | Negative |

|        |                       |          |
|--------|-----------------------|----------|
| P04280 | QEESPSLIAGNPQGSPQGG   | Negative |
| P04280 | SPSLIAGNPQGSPQGGNKP   | Negative |
| P04280 | SQEESPSLIAGNPQGSPQG   | Negative |
| P04280 | LSVALLALSSAQNLEDVVSQ  | Negative |
| P04280 | LSSAQNLEDVVSQEESPSLI  | Negative |
| P04280 | LLALSSAQNLEDVVSQEESP  | Negative |
| P04280 | SLIAGNPQGSPQGGNKPQG   | Negative |
| P04280 | LLSVALLALSSAQNLEDVVS  | Negative |
| P04280 | ALSSAQNLEDVVSQEESPSL  | Negative |
| P04280 | EDVVSQEESPSLIAGNPQGPS | Negative |
| P04280 | AQNLEDVVSQEESPSLIAGN  | Negative |
| P04280 | VSQEESPSLIAGNPQGSPQ   | Negative |
| P04280 | QNLEDVVSQEESPSLIAGNP  | Negative |
| P04280 | LALSSAQNLEDVVSQEESPS  | Negative |
| P04280 | SSAQNLEDVVSQEESPSLIA  | Negative |
| P04280 | MLLILLSVALLALSSAQNLN  | Negative |
| P04280 | SAQNLEDVVSQEESPSLIAG  | Negative |
| P04280 | ALLALSSAQNLEDVVSQEES  | Negative |
| P04280 | NEDVVSQEESPSLIAGNPQGP | Negative |
| P04284 | GLFNISLLLTCLMVLAIFHS  | Negative |
| P04284 | LAIHFSCEAQNSPQDYLAVH  | Negative |
| P04284 | SCEAQNSPQDYLAVHNDARA  | Negative |
| P04284 | NSPQDYLAVHNDARAQVGVG  | Negative |
| P04284 | DYLAVHNDARAQVGVGPMWS  | Negative |
| P04284 | EAQNSPQDYLAVHNDARAQV  | Negative |
| P04284 | LLLTCLMVLAIFHFSCEAQNS | Negative |
| P04284 | SLLLTCLMVLAIFHFSCEAQN | Negative |
| P04284 | SPQDYLAVHNDARAQVGVGPM | Negative |
| P04284 | IFHFSCEAQNSPQDYLAVHND | Negative |
| P04284 | AQNSPQDYLAVHNDARAQVG  | Negative |
| P04284 | FNISLLLTCLMVLAIFHFSCE | Negative |
| P04284 | QNSPQDYLAVHNDARAQVG   | Negative |
| P04284 | QDYLAVHNDARAQVGVGPM   | Negative |
| P04284 | MVLAIFHFSCEAQNSPQDYL  | Negative |
| P04284 | TCLMVLAIFHFSCEAQNSPQD | Negative |
| P04284 | LLTCLMVLAIFHFSCEAQNSP | Negative |
| P04284 | VLAIFHFSCEAQNSPQDYLAV | Negative |
| P04284 | PQDYLAVHNDARAQVGVGPM  | Negative |
| P04284 | NISLLLTCLMVLAIFHFSCEA | Negative |
| P04284 | FHFSCEAQNSPQDYLAVHND  | Negative |
| P04284 | MGLFNISLLLTCLMVLAIFH  | Negative |
| P04284 | CEAQNSPQDYLAVHNDARAQ  | Negative |
| P04284 | HSCEAQNSPQDYLAVHNDAR  | Negative |
| P04284 | LMVLAIFHFSCEAQNSPQDYL | Negative |
| P04284 | ISLLLTCLMVLAIFHFSCEAQ | Negative |
| P04284 | LFNISLLLTCLMVLAIFHSC  | Negative |

|        |                       |          |
|--------|-----------------------|----------|
| P04284 | CLMVLAIFHSCEAQNSPQDY  | Negative |
| P04284 | AIFHSCEAQNSPQDYLA VHN | Negative |
| P04369 | GAVAAPAFSAPVDQATYNGF  | Negative |
| P04369 | RTTALAALVLGAVAAPAFSA  | Negative |
| P04369 | AALVLGAVAAPAFSAPVDQA  | Negative |
| P04369 | APVDQATYNGFKIYKQQRCE  | Negative |
| P04369 | SAPVDQATYNGFKIYKQQRC  | Negative |
| P04369 | TTALAALVLGAVAAPAFSAP  | Negative |
| P04369 | HKKTSIRTTALAALVLGAVA  | Negative |
| P04369 | PVDQATYNGFKIYKQQRCE   | Negative |
| P04369 | TALAALVLGAVAAPAFSAPV  | Negative |
| P04369 | TSIRTTALAALVLGAVAAPA  | Negative |
| P04369 | APAFSAPVDQATYNGFKIYK  | Negative |
| P04369 | LVLGAVAAPAFSAPVDQATY  | Negative |
| P04369 | VDQATYNGFKIYKQQRCE    | Negative |
| P04369 | IRTTALAALVLGAVAAPAFS  | Negative |
| P04369 | MDHKKTSIRTTALAALVLGA  | Negative |
| P04369 | KKTSIRTTALAALVLGAVAA  | Negative |
| P04369 | VLGAVAAPAFSAPVDQATYN  | Negative |
| P04369 | AAPAFSAPVDQATYNGFKIY  | Negative |
| P04369 | AVAAPAFSAPVDQATYNGFK  | Negative |
| P04369 | ALVLGAVAAPAFSAPVDQAT  | Negative |
| P04369 | ALAALVLGAVAAPAFSAPVD  | Negative |
| P04369 | SIRTTALAALVLGAVAAPAF  | Negative |
| P04369 | FSAPVDQATYNGFKIYKQQR  | Negative |
| P04369 | LGAVAAPAFSAPVDQATYNG  | Negative |
| P04369 | DHKKTSIRTTALAALVLGAV  | Negative |
| P04369 | VAAPAFSAPVDQATYNGFKI  | Negative |
| P04369 | PAFSAPVDQATYNGFKIYKQ  | Negative |
| P04369 | AFSAPVDQATYNGFKIYKQQ  | Negative |
| P04369 | KTSIRTTALAALVLGAVAAP  | Negative |
| P04377 | PALAENIEVHMLNKGAEAM   | Negative |
| P04377 | AIKFAAAGILAMLAAPALAE  | Negative |
| P04377 | AAPALAENIEVHMLNKGAE   | Negative |
| P04377 | AMLAAPALAENIEVHMLNKG  | Negative |
| P04377 | APALAENIEVHMLNKGAE    | Negative |
| P04377 | GILAMLAAPALAENIEVHML  | Negative |
| P04377 | LAENIEVHMLNKGAEAMVF   | Negative |
| P04377 | MLNKGAEAMVFEPAYIKAN   | Negative |
| P04377 | IKFAAAGILAMLAAPALAEN  | Negative |
| P04377 | NIEVHMLNKGAEAMVFEP    | Negative |
| P04377 | AAGILAMLAAPALAENIEVH  | Negative |
| P04377 | EVHMLNKGAEAMVFEPAYI   | Negative |
| P04377 | AGILAMLAAPALAENIEVHM  | Negative |
| P04377 | ENIEVHMLNKGAEAMVFEP   | Negative |
| P04377 | LAAPALAENIEVHMLNKGAE  | Negative |

|        |                      |          |
|--------|----------------------|----------|
| P04377 | MRNIAIKFAAAGILAMLAAP | Negative |
| P04377 | FAAAGILAMLAAPALAENIE | Negative |
| P04377 | RNIAIKFAAAGILAMLAAPA | Negative |
| P04377 | IEVHMLNKGAEAMVFEPAY  | Negative |
| P04377 | IAIKFAAAGILAMLAAPALA | Negative |
| P04377 | MLAAPALAENIEVHMLNKG  | Negative |
| P04377 | NIAIKFAAAGILAMLAAPAL | Negative |
| P04377 | AENIEVHMLNKGAEAMVFE  | Negative |
| P04377 | KFAAAGILAMLAAPALAENI | Negative |
| P04377 | VHMLNKGAEAMVFEPAYIK  | Negative |
| P04377 | ALAENIEVHMLNKGAEAMV  | Negative |
| P04377 | HMLNKGAEAMVFEPAYIKA  | Negative |
| P04377 | ILAMLAAPALAENIEVHMLN | Negative |
| P04377 | LAMLAAPALAENIEVHMLNK | Negative |
| P04405 | GCFALREQAQQNECQIQKL  | Negative |
| P04405 | QIQKLNALKPDNRIESEG   | Negative |
| P04405 | REQAQQNECQIQKLNALKPD | Negative |
| P04405 | CFLFSGCFALREQAQQNEC  | Negative |
| P04405 | SGCFALREQAQQNECQIQKL | Negative |
| P04405 | CQIQKLNALKPDNRIESEG  | Negative |
| P04405 | QAQQNECQIQKLNALKPDNR | Negative |
| P04405 | QNECQIQKLNALKPDNRIS  | Negative |
| P04405 | LSLCFLFSGCFALREQAQQ  | Negative |
| P04405 | LFSGCFALREQAQQNECQIQ | Negative |
| P04405 | MAKLVLSLCFLFSGCFALR  | Negative |
| P04405 | SLCFLFSGCFALREQAQQN  | Negative |
| P04405 | QQNECQIQKLNALKPDNRIE | Negative |
| P04405 | AKLVLSLCFLFSGCFALRE  | Negative |
| P04405 | AQQNECQIQKLNALKPDNRI | Negative |
| P04405 | IQKLNALKPDNRIESEGFI  | Negative |
| P04405 | NECQIQKLNALKPDNRIESE | Negative |
| P04405 | ECQIQKLNALKPDNRIESE  | Negative |
| P04405 | FSGCFALREQAQQNECQIQK | Negative |
| P04405 | LREQAQQNECQIQKLNALKP | Negative |
| P04405 | CFALREQAQQNECQIQKLNA | Negative |
| P04405 | LLFSGCFALREQAQQNECQI | Negative |
| P04405 | FLLFSGCFALREQAQQNECQ | Negative |
| P04405 | LCFLFSGCFALREQAQQNE  | Negative |
| P04405 | EQAQQNECQIQKLNALKPDN | Negative |
| P04405 | ALREQAQQNECQIQKLNALK | Negative |
| P04405 | KLVLSLCFLFSGCFALREQ  | Negative |
| P04405 | VLSLCFLFSGCFALREQAQ  | Negative |
| P04405 | FALREQAQQNECQIQKLNAL | Negative |
| P04421 | LKKLGLDGYKGVSLANWLCL | Negative |
| P04421 | RTLKKLGLDGYKGVSLANWL | Negative |
| P04421 | VAVQGKVFERCELARTLKKL | Negative |

|        |                      |          |
|--------|----------------------|----------|
| P04421 | ALVILGFLFLSVAVQGKVF  | Negative |
| P04421 | FLFLSVAVQGKVF        | Negative |
| P04421 | MKALVILGFLFLSVAVQGV  | Negative |
| P04421 | ARTLKKLGLDGYKGVSLANW | Negative |
| P04421 | VQGKVF               | Negative |
| P04421 | QGVFERCELARTLKKLGLD  | Negative |
| P04421 | ERCELARTLKKLGLDGYKGV | Negative |
| P04421 | LARTLKKLGLDGYKGVSLAN | Negative |
| P04421 | FERCELARTLKKLGLDGYKG | Negative |
| P04421 | TLKKLGLDGYKGVSLANWLC | Negative |
| P04421 | LFLSVAVQGKVF         | Negative |
| P04421 | LGFLFLSVAVQGKVF      | Negative |
| P04421 | AVQGKVF              | Negative |
| P04421 | ERCELARTLKKLGLDGYK   | Negative |
| P04421 | CELARTLKKLGLDGYKGVSL | Negative |
| P04421 | ILGFLFLSVAVQGKVF     | Negative |
| P04421 | KVF                  | Negative |
| P04421 | ELARTLKKLGLDGYKGVSLA | Negative |
| P04421 | LSVAVQGKVF           | Negative |
| P04421 | KALVILGFLFLSVAVQGV   | Negative |
| P04421 | GKVF                 | Negative |
| P04421 | SVAVQGKVF            | Negative |
| P04421 | FLSVAVQGKVF          | Negative |
| P04421 | VILGFLFLSVAVQGV      | Negative |
| P04421 | GFLFLSVAVQGKVF       | Negative |
| P04421 | RCELARTLKKLGLDGYKGV  | Negative |
| P04552 | LCIFAMMATLAMSR       | Negative |
| P04552 | KFLNKA               | Negative |
| P04552 | SR                   | Negative |
| P04552 | VEPKFLNKA            | Negative |
| P04552 | LNKA                 | Negative |
| P04552 | MMATLAMSR            | Negative |
| P04552 | WHYVEPKFLNKA         | Negative |
| P04552 | AMSR                 | Negative |
| P04552 | YVEPKFLNKA           | Negative |
| P04552 | MATLAMSR             | Negative |
| P04552 | HYVEPKFLNKA          | Negative |
| P04552 | SWHYVEPKFLNKA        | Negative |
| P04552 | LAMSR                | Negative |
| P04552 | EPKFLNKA             | Negative |
| P04552 | AMMATLAMSR           | Negative |
| P04552 | CIFAMMATLAMSR        | Negative |
| P04552 | FAMMATLAMSR          | Negative |
| P04552 | RSWHYVEPKFLNKA       | Negative |
| P04552 | MSR                  | Negative |
| P04552 | IFAMMATLAMSR         | Negative |

|        |                      |          |
|--------|----------------------|----------|
| P04552 | FLNKAFEVALKVQIIAGFDR | Negative |
| P04552 | TLAMSRSWHYVEPKFLNKAF | Negative |
| P04552 | ATLAMSRSWHYVEPKFLNKA | Negative |
| P04552 | NKAFEVALKVQIIAGFDRGL | Negative |
| P04552 | LLVLCIFAMMATLAMSRSWH | Negative |
| P04552 | MKLLVLCIFAMMATLAMSR  | Negative |
| P04552 | VLCIFAMMATLAMSRSWHYV | Negative |
| P04552 | KLLVLCIFAMMATLAMSR   | Negative |
| P04552 | PKFLNKAFEVALKVQIIAGF | Negative |
| P04557 | DPVNGDEQLSEDNVILPKEK | Negative |
| P04557 | VSMFLQLDPVNGDEQLSEDN | Negative |
| P04557 | RLGLFLIWAGVSMFLQLDPV | Negative |
| P04557 | MALRLGLFLIWAGVSMFLQL | Negative |
| P04557 | EQLSEDNVILPKEKKDPASG | Negative |
| P04557 | AGVSMFLQLDPVNGDEQLSE | Negative |
| P04557 | LFLIWAGVSMFLQLDPVNGD | Negative |
| P04557 | LSEDNVILPKEKKDPASGAE | Negative |
| P04557 | LQLDPVNGDEQLSEDNVILP | Negative |
| P04557 | FLIWAGVSMFLQLDPVNGDE | Negative |
| P04557 | SMFLQLDPVNGDEQLSEDNV | Negative |
| P04557 | IWAGVSMFLQLDPVNGDEQL | Negative |
| P04557 | DEQLSEDNVILPKEKKDPAS | Negative |
| P04557 | NGDEQLSEDNVILPKEKKDP | Negative |
| P04557 | LRLGLFLIWAGVSMFLQLDP | Negative |
| P04557 | QLDPVNGDEQLSEDNVILPK | Negative |
| P04557 | SEDNVILPKEKKDPASGAET | Negative |
| P04557 | VNGDEQLSEDNVILPKEKKD | Negative |
| P04557 | LGLFLIWAGVSMFLQLDPVN | Negative |
| P04557 | PVNGDEQLSEDNVILPKEKK | Negative |
| P04557 | QLSEDNVILPKEKKDPASGA | Negative |
| P04557 | LDPVNGDEQLSEDNVILPKE | Negative |
| P04557 | GDEQLSEDNVILPKEKKDPA | Negative |
| P04557 | FLQLDPVNGDEQLSEDNVIL | Negative |
| P04557 | GLFLIWAGVSMFLQLDPVNG | Negative |
| P04557 | MFLQLDPVNGDEQLSEDNVI | Negative |
| P04557 | LIWAGVSMFLQLDPVNGDEQ | Negative |
| P04557 | GVSMFLQLDPVNGDEQLSED | Negative |
| P04557 | ALRLGLFLIWAGVSMFLQLD | Negative |
| P04634 | PGNPEANMNISQMITYWGYP | Negative |
| P04634 | WLLITSVISTFGGAHGLFG  | Negative |
| P04634 | GNPEANMNISQMITYWGYP  | Negative |
| P04634 | PEANMNISQMITYWGYP    | Negative |
| P04634 | NPEANMNISQMITYWGYP   | Negative |
| P04634 | GAHGLFGKLGPGNPEANMNI | Negative |
| P04634 | ITSVISTFGGAHGLFGKLG  | Negative |
| P04634 | TFGGAHGLFGKLGPGNPEAN | Negative |

|        |                      |          |
|--------|----------------------|----------|
| P04634 | ANMNISQMITYWGYPCQEYE | Negative |
| P04634 | TSVISTFGGAHGLFGKLGPG | Negative |
| P04634 | STFGGAHGLFGKLGPGNPEA | Negative |
| P04634 | MWLLLITSVISTFGGAHGLF | Negative |
| P04634 | HGLFGKLGPGNPEANMNISQ | Negative |
| P04634 | ISTFGGAHGLFGKLGPGNPE | Negative |
| P04634 | GKLGPGNPEANMNISQMITY | Negative |
| P04634 | GGAHGLFGKLGPGNPEANMN | Negative |
| P04634 | SVISTFGGAHGLFGKLGPGN | Negative |
| P04634 | KLGPNGPEANMNISQMITYW | Negative |
| P04634 | GPGNPEANMNISQMITYWGY | Negative |
| P04634 | LGPNGPEANMNISQMITYWG | Negative |
| P04634 | GLFGKLGPGNPEANMNISQM | Negative |
| P04634 | FGKLGPGNPEANMNISQMIT | Negative |
| P04634 | LLLITSVISTFGGAHGLFGK | Negative |
| P04634 | EANMNISQMITYWGYPCQEY | Negative |
| P04634 | AHGLFGKLGPGNPEANMNIS | Negative |
| P04634 | LFGKLGPGNPEANMNISQMI | Negative |
| P04634 | FGGAHGLFGKLGPGNPEANM | Negative |
| P04634 | LITSVISTFGGAHGLFGKLG | Negative |
| P04634 | VISTFGGAHGLFGKLGPGNP | Negative |
| P04635 | QHTFSIRKSAYGAASVMVAS | Negative |
| P04635 | MKETKHQHTFSIRKSAYGAA | Negative |
| P04635 | AASVMVASCIFVIGGGVAEA | Negative |
| P04635 | FVIGGGVAEANDSTTQTTTP | Negative |
| P04635 | IRKSAYGAASVMVASCIFVI | Negative |
| P04635 | RKSAYGAASVMVASCIFVIG | Negative |
| P04635 | ETKHQHTFSIRKSAYGAASV | Negative |
| P04635 | CIFVIGGGVAEANDSTTQTT | Negative |
| P04635 | AYGAASVMVASCIFVIGGGV | Negative |
| P04635 | YGAASVMVASCIFVIGGGVA | Negative |
| P04635 | VIGGGVAEANDSTTQTTTPL | Negative |
| P04635 | SIRKSAYGAASVMVASCIFV | Negative |
| P04635 | SAYGAASVMVASCIFVIGGG | Negative |
| P04635 | VMVASCIFVIGGGVAEANDS | Negative |
| P04635 | SVMVASCIFVIGGGVAEAND | Negative |
| P04635 | GAASVMVASCIFVIGGGVAE | Negative |
| P04635 | MVASCIFVIGGGVAEANDST | Negative |
| P04635 | TKHQHTFSIRKSAYGAASVM | Negative |
| P04635 | HTFSIRKSAYGAASVMVASC | Negative |
| P04635 | IFVIGGGVAEANDSTTQTTT | Negative |
| P04635 | KETKHQHTFSIRKSAYGAAS | Negative |
| P04635 | FSIRKSAYGAASVMVASCIF | Negative |
| P04635 | KHQHTFSIRKSAYGAASVMV | Negative |
| P04635 | TFSIRKSAYGAASVMVASCI | Negative |
| P04635 | ASVMVASCIFVIGGGVAEAN | Negative |



|        |                      |          |
|--------|----------------------|----------|
| P04635 | KSAYGAASVMVASCIFVIGG | Negative |
| P04635 | ASCIFVIGGGVAEANDSTTQ | Negative |
| P04635 | SCIFVIGGGVAEANDSTTQT | Negative |
| P04635 | HQHTFSIRKSAYGAASVMVA | Negative |
| P04639 | QDEPQSQWDRVKDFATVYVD | Negative |
| P04639 | LTGCQAWFEWQQDEPQSQWD | Negative |
| P04639 | LVFLTGCQAWFEWQQDEPQS | Negative |
| P04639 | MKAAVLAVLVFLTGCQAWFE | Negative |
| P04639 | VALVFLTGCQAWFEWQQDEP | Negative |
| P04639 | EFWQQDEPQSQWDRVKDFAT | Negative |
| P04639 | DEPQSQWDRVKDFATVYVDA | Negative |
| P04639 | LAVALVFLTGCQAWFEWQQD | Negative |
| P04639 | AAVLAVLVFLTGCQAWFEW  | Negative |
| P04639 | GCQAWFEWQQDEPQSQWDRV | Negative |
| P04639 | QWDRVKDFATVYVDAVKDSG | Negative |
| P04639 | QAWFEWQQDEPQSQWDRVKD | Negative |
| P04639 | ALVFLTGCQAWFEWQQDEPQ | Negative |
| P04639 | AVALVFLTGCQAWFEWQQDE | Negative |
| P04639 | WEFWQQDEPQSQWDRVKDFA | Negative |
| P04639 | TGCQAWFEWQQDEPQSQWDR | Negative |
| P04639 | EPQSQWDRVKDFATVYVDAV | Negative |
| P04639 | WQQDEPQSQWDRVKDFATVY | Negative |
| P04639 | QSQWDRVKDFATVYVDAVKD | Negative |
| P04639 | AWEFWQQDEPQSQWDRVKDF | Negative |
| P04639 | QQDEPQSQWDRVKDFATVYV | Negative |
| P04639 | FLTGCQAWFEWQQDEPQSQW | Negative |
| P04639 | VFLTGCQAWFEWQQDEPQSQ | Negative |
| P04639 | CQAWFEWQQDEPQSQWDRVK | Negative |
| P04639 | PQSQWDRVKDFATVYVDAVK | Negative |
| P04639 | VLAVALVFLTGCQAWFEWQQ | Negative |
| P04639 | KAAVLAVLVFLTGCQAWFE  | Negative |
| P04639 | FWQQDEPQSQWDRVKDFATV | Negative |
| P04639 | SQWDRVKDFATVYVDAVKDS | Negative |
| P04651 | LGVAGVWASRGPLRPLCQPI | Negative |
| P04651 | GVAGVWASRGPLRPLCQPIN | Negative |
| P04651 | LWLLLGVAGVWASRGPLRPL | Negative |
| P04651 | CQPINATLAAEKEACPVCIT | Negative |
| P04651 | ASRGPLRPLCQPINATLAAE | Negative |
| P04651 | LLWLLLGVAGVWASRGPLR  | Negative |
| P04651 | MFQGLLLWLLLGVAGVWASR | Negative |
| P04651 | MEMFQGLLLWLLLGVAGVWA | Negative |
| P04651 | RGPLRPLCQPINATLAAEKE | Negative |
| P04651 | AGVWASRGPLRPLCQPINAT | Negative |
| P04651 | LLWLLLGVAGVWASRGPLRP | Negative |
| P04651 | QPINATLAAEKEACPVCITF | Negative |
| P04651 | GPLRPLCQPINATLAAEKEA | Negative |

|        |                      |          |
|--------|----------------------|----------|
| P04651 | LRPLCQPINATLAAEKEACP | Negative |
| P04651 | FQGLLLWLLLGWAGVWASRG | Negative |
| P04651 | VAGVWASRGPLRPLCQPINA | Negative |
| P04651 | WLLLGWAGVWASRGPLRPLC | Negative |
| P04651 | QGLLLWLLLGWAGVWASRGP | Negative |
| P04651 | LLGWAGVWASRGPLRPLCQP | Negative |
| P04651 | PLCQPINATLAAEKEACPVC | Negative |
| P04651 | WASRGPLRPLCQPINATLAA | Negative |
| P04651 | VWASRGPLRPLCQPINATLA | Negative |
| P04651 | GVWASRGPLRPLCQPINATL | Negative |
| P04651 | SRGPLRPLCQPINATLAAEK | Negative |
| P04651 | PLRPLCQPINATLAAEKEAC | Negative |
| P04651 | LCQPINATLAAEKEACPVC  | Negative |
| P04651 | LLLGWAGVWASRGPLRPLCQ | Negative |
| P04651 | EMFQGLLLWLLLGWAGVWAS | Negative |
| P04651 | RPLCQPINATLAAEKEACP  | Negative |
| P04667 | VLLALSPGVDAAAAQHLCGS | Negative |
| P04667 | LSPGVDAAAAQHLCGSHLVD | Negative |
| P04667 | AAQHLCGSHLVDALYLCGE  | Negative |
| P04667 | SLLVLLALSPGVDAAAAQHL | Negative |
| P04667 | LQAASLLVLLALSPGVDA   | Negative |
| P04667 | WLQAASLLVLLALSPGVDA  | Negative |
| P04667 | QAASLLVLLALSPGVDA    | Negative |
| P04667 | LVLLALSPGVDAAAAQHLCG | Negative |
| P04667 | HLCGSHLVDALYLCGEKGF  | Negative |
| P04667 | AAAAQHLCGSHLVDALYLC  | Negative |
| P04667 | GVDAAAAQHLCGSHLVDALY | Negative |
| P04667 | SPGVDAAAAQHLCGSHLVD  | Negative |
| P04667 | LALSPGVDAAAAQHLCGSHL | Negative |
| P04667 | AASLLVLLALSPGVDAAAAQ | Negative |
| P04667 | LCGSHLVDALYLCGEKGFF  | Negative |
| P04667 | LLALSPGVDAAAAQHLCGSH | Negative |
| P04667 | LLVLLALSPGVDAAAAQHLC | Negative |
| P04667 | CGSHLVDALYLCGEKGFFY  | Negative |
| P04667 | ALSPGVDAAAAQHLCGSHLV | Negative |
| P04667 | AQHLCGSHLVDALYLCGEK  | Negative |
| P04667 | FWLQAASLLVLLALSPGVDA | Negative |
| P04667 | DAAAQHLCGSHLVDALYLV  | Negative |
| P04667 | AFWLQAASLLVLLALSPGVD | Negative |
| P04667 | MAFWLQAASLLVLLALSPGV | Negative |
| P04667 | GSHLVDALYLCGEKGFFYT  | Negative |
| P04667 | QHLCGSHLVDALYLCGEKG  | Negative |
| P04667 | PGVDAAAAQHLCGSHLVDAL | Negative |
| P04667 | VDAAAQHLCGSHLVDALYL  | Negative |
| P04667 | AAQHLCGSHLVDALYLCG   | Negative |
| P04706 | SATSTHTSGGCGCQPPPPVH | Negative |

|        |                      |          |
|--------|----------------------|----------|
| P04706 | VLLVALALLALAASATSTHT | Negative |
| P04706 | TSGGCGCQPPPPVHLPPPVH | Negative |
| P04706 | LALAASATSTHTSGGCGCQP | Negative |
| P04706 | GGCGCQPPPPVHLPPPVHLP | Negative |
| P04706 | SGGCGCQPPPPVHLPPPVHL | Negative |
| P04706 | LLALAASATSTHTSGGCGCQ | Negative |
| P04706 | AASATSTHTSGGCGCQPPPP | Negative |
| P04706 | LALLALAASATSTHTSGGCG | Negative |
| P04706 | PPPPVHLPPPVHLPPPVHLP | Negative |
| P04706 | ATSTHTSGGCGCQPPPPVHL | Negative |
| P04706 | CGCQPPPPVHLPPPVHLPPP | Negative |
| P04706 | LAASATSTHTSGGCGCQPPP | Negative |
| P04706 | ALALLALAASATSTHTSGGC | Negative |
| P04706 | ALLALAASATSTHTSGGCGC | Negative |
| P04706 | RVLLVALALLALAASATSTH | Negative |
| P04706 | MRVLLVALALLALAASATST | Negative |
| P04706 | ASATSTHTSGGCGCQPPPPV | Negative |
| P04706 | QPPPPVHLPPPVHLPPPVHL | Negative |
| P04706 | THTSGGCGCQPPPPVHLPPP | Negative |
| P04706 | CQPPPPVHLPPPVHLPPPVH | Negative |
| P04706 | HTSGGCGCQPPPPVHLPPPV | Negative |
| P04706 | GCQPPPPVHLPPPVHLPPPV | Negative |
| P04706 | LLVALALLALAASATSTHTS | Negative |
| P04706 | TSTHTSGGCGCQPPPPVHLP | Negative |
| P04706 | STHTSGGCGCQPPPPVHLPP | Negative |
| P04706 | ALAASATSTHTSGGCGCQPP | Negative |
| P04706 | GCGCQPPPPVHLPPPVHLPP | Negative |
| P04706 | VALALLALAASATSTHTSGG | Negative |
| P04785 | DNVLVLKKSNAEALAAHNY  | Negative |
| P04785 | CLALAWAARVGADALEEEDN | Negative |
| P04785 | SRALLCLALAWAARVGADAL | Negative |
| P04785 | WAARVGADALEEEDNVVLVK | Negative |
| P04785 | NVLVLKKSNAEALAAHNYL  | Negative |
| P04785 | DALEEEDNVVLVLKKSNAEA | Negative |
| P04785 | RALLCLALAWAARVGADALE | Negative |
| P04785 | MLSRALLCLALAWAARVGAD | Negative |
| P04785 | VLVLKKSNAEALAAHNYLL  | Negative |
| P04785 | GADALEEEDNVVLVLKKSNA | Negative |
| P04785 | LEEEDNVVLVLKKSNAEALA | Negative |
| P04785 | RVGADALEEEDNVVLVLKKS | Negative |
| P04785 | VGADALEEEDNVVLVLKKS  | Negative |
| P04785 | LSRALLCLALAWAARVGADA | Negative |
| P04785 | ALEEEDNVVLVLKKSNAEAL | Negative |
| P04785 | EDNVVLVLKKSNAEALAAHN | Negative |
| P04785 | LVLKKSNAEALAAHNYLLV  | Negative |
| P04785 | ARVGADALEEEDNVVLVLKS | Negative |

|        |                       |          |
|--------|-----------------------|----------|
| P04785 | LALAWAARVGADALEEEDNV  | Negative |
| P04785 | ALAWAARVGADALEEEDNVL  | Negative |
| P04785 | EEEDNVLVLKKSNAEALAA   | Negative |
| P04785 | LAWAARVGADALEEEDNVLV  | Negative |
| P04785 | AWAARVGADALEEEDNVVL   | Negative |
| P04785 | LCLALAWAARVGADALEEED  | Negative |
| P04785 | VLKKSNAEALAAHNYLLVE   | Negative |
| P04785 | EEDNVLVLKKSNAEALAAH   | Negative |
| P04785 | AARVGADALEEEDNVVLK    | Negative |
| P04785 | ADALEEEDNVVLKKSNAE    | Negative |
| P04785 | LLCLALAWAARVGADALEEE  | Negative |
| P04816 | KVAVVGAMSGPIAQWGDMEF  | Negative |
| P04816 | GMIALAISHTAMADDIKVAV  | Negative |
| P04816 | AMADDIKVAVVGAMSGPIAQ  | Negative |
| P04816 | MIALAISHTAMADDIKVAVV  | Negative |
| P04816 | TAMADDIKVAVVGAMSGPIA  | Negative |
| P04816 | ALAISHTAMADDIKVAVVGA  | Negative |
| P04816 | AKTIIAGMIALAISHTAMAD  | Negative |
| P04816 | IALAISHTAMADDIKVAVVG  | Negative |
| P04816 | KTIIAGMIALAISHTAMADD  | Negative |
| P04816 | LAISHTAMADDIKVAVVGAM  | Negative |
| P04816 | DIKVAVVGAMSGPIAQWGD   | Negative |
| P04816 | IKVAVVGAMSGPIAQWGDM   | Negative |
| P04816 | NAKTIIAGMIALAISHTAMA  | Negative |
| P04816 | AGMIALAISHTAMADDIKVA  | Negative |
| P04816 | ADDIKVAVVGAMSGPIAQWG  | Negative |
| P04816 | MADDIKVAVVGAMSGPIAQW  | Negative |
| P04816 | AISHTAMADDIKVAVVGAMS  | Negative |
| P04816 | RNAKTIIAGMIALAISHTAM  | Negative |
| P04816 | VVGAMSGPIAQWGDMEFN    | Negative |
| P04816 | KRNAKTIIAGMIALAISHTA  | Negative |
| P04816 | ISHTAMADDIKVAVVGAMSG  | Negative |
| P04816 | TIIAGMIALAISHTAMADDI  | Negative |
| P04816 | AVVGAMSGPIAQWGDMEFN   | Negative |
| P04816 | IIAGMIALAISHTAMADDIK  | Negative |
| P04816 | SHTAMADDIKVAVVGAMSGP  | Negative |
| P04816 | VAVVGAMSGPIAQWGDMEFN  | Negative |
| P04816 | DDIKVAVVGAMSGPIAQWGD  | Negative |
| P04816 | HTAMADDIKVAVVGAMSGPI  | Negative |
| P04816 | MKRNAKTIIAGMIALAISHT  | Negative |
| P04916 | LVLLAALGGGSAERDCRVSS  | Negative |
| P04916 | SFRVKENFDKARFSGLWYAI  | Negative |
| P04916 | ALVLLAALGGGSAERDCRVSS | Negative |
| P04916 | AERDCRVSSFRVKENFDKAR  | Negative |
| P04916 | VSSFRVKENFDKARFSGLWY  | Negative |
| P04916 | SSFRVKENFDKARFSGLWYA  | Negative |

|        |                      |          |
|--------|----------------------|----------|
| P04916 | KENFDKARFSGLWYAIKKD  | Negative |
| P04916 | WVWALVLLAALGGGSAERDC | Negative |
| P04916 | SAERDCRVSSFRVKENFDKA | Negative |
| P04916 | ALGGGSAERDCRVSSFRVKE | Negative |
| P04916 | DCRVSSFRVKENFDKARFSG | Negative |
| P04916 | VKENFDKARFSGLWYAIKK  | Negative |
| P04916 | MEWVWALVLLAALGGGSAER | Negative |
| P04916 | ERDCRVSSFRVKENFDKARF | Negative |
| P04916 | VLLAALGGGSAERDCRVSSF | Negative |
| P04916 | RDCRVSSFRVKENFDKARFS | Negative |
| P04916 | RVSSFRVKENFDKARFSGLW | Negative |
| P04916 | GGGSAERDCRVSSFRVKENF | Negative |
| P04916 | WALVLLAALGGGSAERDCRV | Negative |
| P04916 | LLAALGGGSAERDCRVSSFR | Negative |
| P04916 | CRVSSFRVKENFDKARFSGL | Negative |
| P04916 | GGSAERDCRVSSFRVKENFD | Negative |
| P04916 | EWVWALVLLAALGGGSAERD | Negative |
| P04916 | LGGGSAERDCRVSSFRVKEN | Negative |
| P04916 | GSAERDCRVSSFRVKENFDK | Negative |
| P04916 | RVKENFDKARFSGLWYAIK  | Negative |
| P04916 | FRVKENFDKARFSGLWYAI  | Negative |
| P04916 | AALGGGSAERDCRVSSFRVK | Negative |
| P04916 | LAALGGGSAERDCRVSSFRV | Negative |
| P04925 | LGYWLLALFVTMWTDVGLCK | Negative |
| P04925 | MWTDVGLCKKRPKPGGWNTG | Negative |
| P04925 | RPKPGGWNTGGSRYPGQSP  | Negative |
| P04925 | ALFVTMWTDVGLCKKRPKPG | Negative |
| P04925 | YWLLALFVTMWTDVGLCKKR | Negative |
| P04925 | CKKRPKPGGWNTGGSRYPGQ | Negative |
| P04925 | GWNTGGSRYPGQGSPGGNRY | Negative |
| P04925 | PKPGGWNTGGSRYPGQGSPG | Negative |
| P04925 | KPGGWNTGGSRYPGQGSPGG | Negative |
| P04925 | DVGLCKKRPKPGGWNTGGSR | Negative |
| P04925 | WTDVGLCKKRPKPGGWNTGG | Negative |
| P04925 | PGGWNTGGSRYPGQGSPGGN | Negative |
| P04925 | VTMWTDVGLCKKRPKPGGWN | Negative |
| P04925 | ANLGYWLLALFVTMWTDVGL | Negative |
| P04925 | FVTMWTDVGLCKKRPKPGGW | Negative |
| P04925 | GGWNTGGSRYPGQGSPGGNR | Negative |
| P04925 | VGLCKKRPKPGGWNTGGSRY | Negative |
| P04925 | GLCKKRPKPGGWNTGGSRYP | Negative |
| P04925 | GYWLLALFVTMWTDVGLCKK | Negative |
| P04925 | KRPKPGGWNTGGSRYPGQGS | Negative |
| P04925 | MANLGYWLLALFVTMWTDVG | Negative |
| P04925 | LALFVTMWTDVGLCKKRPKP | Negative |
| P04925 | TMWTDVGLCKKRPKPGGWNT | Negative |

|        |                      |          |
|--------|----------------------|----------|
| P04925 | KKRPKPGGWNTGGSRYPGQG | Negative |
| P04925 | WLLALFVTMWTDVGLCKKRP | Negative |
| P04925 | NLGYWLLALFVTMWTDVGLC | Negative |
| P04925 | LCKKRPKPGGWNTGGSRYPG | Negative |
| P04925 | LFVTMWTDVGLCKKRPKPGG | Negative |
| P04925 | TDVGLCKKRPKPGGWNTGGS | Negative |
| P04937 | LAVLCLGTSVRCTETGKSKR | Negative |
| P04937 | LLLAVLCLGTSVRCTETGKS | Negative |
| P04937 | VLCLGTSVRCTETGKSKRQA | Negative |
| P04937 | TGKSKRQAQQIVQPPSPVAV | Negative |
| P04937 | LCLGTSVRCTETGKSKRQAQ | Negative |
| P04937 | ETGKSKRQAQQIVQPPSPA  | Negative |
| P04937 | TETGKSKRQAQQIVQPPSPV | Negative |
| P04937 | SVRCTETGKSKRQAQQIVQP | Negative |
| P04937 | LLAVLCLGTSVRCTETGKSK | Negative |
| P04937 | MLRGPGPGRLLLLAVLCLGT | Negative |
| P04937 | GRLLLAVLCLGTSVRCTET  | Negative |
| P04937 | RLLLLAVLCLGTSVRCTETG | Negative |
| P04937 | CLGTSVRCTETGKSKRQAQQ | Negative |
| P04937 | GKSKRQAQQIVQPPSPVAVS | Negative |
| P04937 | PGRLLLLAVLCLGTSVRCTE | Negative |
| P04937 | SKRQAQQIVQPPSPVAVSQS | Negative |
| P04937 | GPGPGRLLLLAVLCLGTSVR | Negative |
| P04937 | GTSVRCTETGKSKRQAQQIV | Negative |
| P04937 | PGPGRLLLLAVLCLGTSVRC | Negative |
| P04937 | LRGPGPGRLLLLAVLCLGTS | Negative |
| P04937 | LGTSVRCTETGKSKRQAQQI | Negative |
| P04937 | GPGRLLLLAVLCLGTSVRCT | Negative |
| P04937 | RCTETGKSKRQAQQIVQPPS | Negative |
| P04937 | CTETGKSKRQAQQIVQPPSP | Negative |
| P04937 | RGPGPGRLLLLAVLCLGTSV | Negative |
| P04937 | VRCTETGKSKRQAQQIVQPP | Negative |
| P04937 | AVLCLGTSVRCTETGKSKRQ | Negative |
| P04937 | KSKRQAQQIVQPPSPVAVSQ | Negative |
| P04937 | TSVRCTETGKSKRQAQQIVQ | Negative |
| P04957 | AVTATASAQTGGSFFDPFNG | Negative |
| P04957 | LLLVTGLFMSLFAVTATAS  | Negative |
| P04957 | KRVLLLLVTGLFMSLFAVTA | Negative |
| P04957 | SLFAVTATASAQTGGSFFDP | Negative |
| P04957 | LLLVTGLFMSLFAVTATASA | Negative |
| P04957 | TASAQTGGSFFDPFNGYNSG | Negative |
| P04957 | LLVTGLFMSLFAVTATASAQ | Negative |
| P04957 | MPYLKRVLLLLVTGLFMSLF | Negative |
| P04957 | VTGLFMSLFAVTATASAQTG | Negative |
| P04957 | TGLFMSLFAVTATASAQTGG | Negative |
| P04957 | MSLFAVTATASAQTGGSFFD | Negative |

|        |                      |          |
|--------|----------------------|----------|
| P04957 | RVLLLLVTGLFMSLFAVTAT | Negative |
| P04957 | ATASAQTGGSFFDPFNGYNS | Negative |
| P04957 | TGGSFFDPFNGYNSGFWQKA | Negative |
| P04957 | LFAVTATASAQTGGSFFDPF | Negative |
| P04957 | VLLLLVTGLFMSLFAVTATA | Negative |
| P04957 | QTGGSFFDPFNGYNSGFWQK | Negative |
| P04957 | VTATASAQTGGSFFDPFNGY | Negative |
| P04957 | ASAQTGGSFFDPFNGYNSGF | Negative |
| P04957 | YLKRVLLLLVTGLFMSLFAV | Negative |
| P04957 | AQTGGSFFDPFNGYNSGFWQ | Negative |
| P04957 | SAQTGGSFFDPFNGYNSGFW | Negative |
| P04957 | LKRVLLLLVTGLFMSLFAVT | Negative |
| P04957 | LFMSLFAVTATASAQTGGSF | Negative |
| P04957 | LVTGLFMSLFAVTATASAQT | Negative |
| P04957 | PYLKRVLLLLVTGLFMSLFA | Negative |
| P04957 | TATASAQTGGSFFDPFNGYN | Negative |
| P04957 | FMSLFAVTATASAQTGGSFF | Negative |
| P04957 | FAVTATASAQTGGSFFDPFN | Negative |
| P05000 | MALLFPLLAALVMTSYSPVG | Negative |
| P05000 | ALVMTSYSPVGSLGCDLPQN | Negative |
| P05000 | LPQNHGLLSRNTLVLLHQMR | Negative |
| P05000 | VGSLGCDLPQNHGLLSRNTL | Negative |
| P05000 | TSYSPVGSLGCDLPQNHGLL | Negative |
| P05000 | YSPVGSLGCDLPQNHGLLSR | Negative |
| P05000 | PQNHGLLSRNTLVLLHQMRR | Negative |
| P05000 | SPVGSLGCDLPQNHGLLSRN | Negative |
| P05000 | LAALVMTSYSPVGSLGCDLP | Negative |
| P05000 | ALLFPLLAALVMTSYSPVGS | Negative |
| P05000 | LLFPLLAALVMTSYSPVGSL | Negative |
| P05000 | LFPLLAALVMTSYSPVGSLG | Negative |
| P05000 | NHGLLSRNTLVLLHQMRRIS | Negative |
| P05000 | QNHGLLSRNTLVLLHQMRR  | Negative |
| P05000 | LGCDLPQNHGLLSRNTLVLL | Negative |
| P05000 | HGLLSRNTLVLLHQMRRISP | Negative |
| P05000 | VMTSYSPVGSLGCDLPQNHG | Negative |
| P05000 | GCDLPQNHGLLSRNTLVLLH | Negative |
| P05000 | AALVMTSYSPVGSLGCDLPQ | Negative |
| P05000 | MTSYSPVGSLGCDLPQNHGL | Negative |
| P05000 | DLPQNHGLLSRNTLVLLHQM | Negative |
| P05000 | FPLLAALVMTSYSPVGSLGC | Negative |
| P05000 | PVGSLGCDLPQNHGLLSRNT | Negative |
| P05000 | SLGCDLPQNHGLLSRNTLV  | Negative |
| P05000 | GSLGCDLPQNHGLLSRNTLV | Negative |
| P05000 | SYSPVGSLGCDLPQNHGLLS | Negative |
| P05000 | CDLPQNHGLLSRNTLVLLHQ | Negative |
| P05000 | PLLAALVMTSYSPVGSLGCD | Negative |

|        |                       |          |
|--------|-----------------------|----------|
| P05000 | LVMTSYSPVGS LGCDLPQNH | Negative |
| P05013 | QTHSLGHRRTMMLLAQMRR   | Negative |
| P05013 | LLMALVVL SCKSSCSLDCDL | Negative |
| P05013 | CKSSCSLDCDLPQTHSLGHR  | Negative |
| P05013 | CDLPQTHSLGHRRTMMLLAQ  | Negative |
| P05013 | LPQTHSLGHRRTMMLLAQMR  | Negative |
| P05013 | MALVVL SCKSSCSLDCDLPQ | Negative |
| P05013 | ALPFALLMALVVL SCKSSCS | Negative |
| P05013 | LPFALLMALVVL SCKSSCSL | Negative |
| P05013 | VL SCKSSCSLDCDLPQTHSL | Negative |
| P05013 | DCDLPQTHSLGHRRTMMLLA  | Negative |
| P05013 | LDCDLPQTHSLGHRRTMMLL  | Negative |
| P05013 | VVL SCKSSCSLDCDLPQTHS | Negative |
| P05013 | DLPQTHSLGHRRTMMLLAQM  | Negative |
| P05013 | ALVVL SCKSSCSLDCDLPQT | Negative |
| P05013 | LSCKSSCSLDCDLPQTHSLG  | Negative |
| P05013 | KSSCSLDCDLPQTHSLGHRR  | Negative |
| P05013 | THSLGHRRTMMLLAQMRRIS  | Negative |
| P05013 | PFALLMALVVL SCKSSCSLD | Negative |
| P05013 | FALLMALVVL SCKSSCSLDC | Negative |
| P05013 | SCKSSCSLDCDLPQTHSLGH  | Negative |
| P05013 | HSLGHRRTMMLLAQMRRISL  | Negative |
| P05013 | SCSLDCDLPQTHSLGHRRTM  | Negative |
| P05013 | LVVL SCKSSCSLDCDLPQTH | Negative |
| P05013 | PQTHSLGHRRTMMLLAQMRR  | Negative |
| P05013 | CSLDCDLPQTHSLGHRRTMM  | Negative |
| P05013 | SLDCDLPQTHSLGHRRTMML  | Negative |
| P05013 | MALPFALLMALVVL SCKSSC | Negative |
| P05013 | SSCSLDCDLPQTHSLGHRRT  | Negative |
| P05013 | LMALVVL SCKSSCSLDCDLP | Negative |
| P05059 | VLALLLCAGQVIALPVNSPM  | Negative |
| P05059 | VNSPMNKGDEVMKCIVEVI   | Negative |
| P05059 | MRSAAVLALLLCAGQVIALP  | Negative |
| P05059 | LPVNSPMNKGDEVMKCIVE   | Negative |
| P05059 | RSAAVLALLLCAGQVIALPV  | Negative |
| P05059 | PVNSPMNKGDEVMKCIVEV   | Negative |
| P05059 | NKGDEVMKCIVEVISDTLS   | Negative |
| P05059 | SPMNKGDEVMKCIVEVISD   | Negative |
| P05059 | AVLALLLCAGQVIALPVNSP  | Negative |
| P05059 | KGDEVMKCIVEVISDTLSK   | Negative |
| P05059 | CAGQVIALPVNSPMNKGDE   | Negative |
| P05059 | MNKGDEVMKCIVEVISDTL   | Negative |
| P05059 | AGQVIALPVNSPMNKGDEV   | Negative |
| P05059 | GQVIALPVNSPMNKGDEVM   | Negative |
| P05059 | NSPMNKGDEVMKCIVEVIS   | Negative |
| P05059 | QVIALPVNSPMNKGDEVMK   | Negative |



|        |                       |          |
|--------|-----------------------|----------|
| P05059 | ALLCAGQVIALPVNSPMNK   | Negative |
| P05059 | GDTEVMKCIVEVISDTLSKP  | Negative |
| P05059 | LLLCAGQVIALPVNSPMNKG  | Negative |
| P05059 | PMNKGDTTEVMKCIVEVISDT | Negative |
| P05059 | TEVMKCIVEVISDTLSKPS   | Negative |
| P05059 | LLCAGQVIALPVNSPMNKGD  | Negative |
| P05059 | LALLCAGQVIALPVNSPMN   | Negative |
| P05059 | SAAVLALLCAGQVIALPVN   | Negative |
| P05059 | LCAGQVIALPVNSPMNKGDT  | Negative |
| P05059 | IALPVNSPMNKGDTTEVMKCI | Negative |
| P05059 | VIALPVNSPMNKGDTTEVMKC | Negative |
| P05059 | ALPVNSPMNKGDTTEVMKCIV | Negative |
| P05059 | DTEVMKCIVEVISDTLSKPS  | Negative |
| P05060 | NRNHNEGMVTRCIEVLSNA   | Negative |
| P05060 | MQPTLLLSLLGAVGLAAVNS  | Negative |
| P05060 | DNRNHNEGMVTRCIEVLSN   | Negative |
| P05060 | MPVDNRNHNEGMVTRCIEV   | Negative |
| P05060 | LLLSLLGAVGLAAVNSMPVD  | Negative |
| P05060 | NEGMVTRCIEVLSNALSKS   | Negative |
| P05060 | EGMVTRCIEVLSNALSKSS   | Negative |
| P05060 | SLLGAVGLAAVNSMPVDNRN  | Negative |
| P05060 | LAAVNSMPVDNRNHNEGMVT  | Negative |
| P05060 | TLLLSLLGAVGLAAVNSMPV  | Negative |
| P05060 | HNEGMVTRCIEVLSNALSK   | Negative |
| P05060 | RNHNEGMVTRCIEVLSNAL   | Negative |
| P05060 | PTLLLSLLGAVGLAAVNSMP  | Negative |
| P05060 | NSMPVDNRNHNEGMVTRCII  | Negative |
| P05060 | GLAAVNSMPVDNRNHNEGMV  | Negative |
| P05060 | AVGLAAVNSMPVDNRNHNEG  | Negative |
| P05060 | VGLAAVNSMPVDNRNHNEGM  | Negative |
| P05060 | PVDNRNHNEGMVTRCIEVL   | Negative |
| P05060 | GAVGLAAVNSMPVDNRNHNE  | Negative |
| P05060 | QPTLLLSLLGAVGLAAVNSM  | Negative |
| P05060 | NHNEGMVTRCIEVLSNALS   | Negative |
| P05060 | LLGAVGLAAVNSMPVDNRNH  | Negative |
| P05060 | VDNRNHNEGMVTRCIEVLS   | Negative |
| P05060 | AAVNSMPVDNRNHNEGMVTR  | Negative |
| P05060 | LSLLGAVGLAAVNSMPVDNR  | Negative |
| P05060 | SMPVDNRNHNEGMVTRCIE   | Negative |
| P05060 | AVNSMPVDNRNHNEGMVTRC  | Negative |
| P05060 | LGAVGLAAVNSMPVDNRNHN  | Negative |
| P05060 | VNSMPVDNRNHNEGMVTRCI  | Negative |
| P05090 | PNPPVQENFDVNKYLGRWYE  | Negative |
| P05090 | AFHLGKCPNPPVQENFDVNK  | Negative |
| P05090 | FGAAEGQAFHLGKCPNPPVQ  | Negative |
| P05090 | EGQAFHLGKCPNPPVQENFD  | Negative |

|        |                       |          |
|--------|-----------------------|----------|
| P05090 | CPNPPVQENFDVNKYLGWRWY | Negative |
| P05090 | GQAFHLGKCPNPPVQENFDV  | Negative |
| P05090 | LLSALAGLFGAAEGQAFHLG  | Negative |
| P05090 | LAGLFGAAEGQAFHLGKCPN  | Negative |
| P05090 | MLLLLLSALAGLFGAAEGQA  | Negative |
| P05090 | GKCPNPPVQENFDVNKYLGR  | Negative |
| P05090 | LLLLSALAGLFGAAEGQAFH  | Negative |
| P05090 | NPPVQENFDVNKYLGWRWYEI | Negative |
| P05090 | GAAEGQAFHLGKCPNPPVQE  | Negative |
| P05090 | LLLLSALAGLFGAAEGQAF   | Negative |
| P05090 | HLGKCPNPPVQENFDVNKYL  | Negative |
| P05090 | LFGAAEGQAFHLGKCPNPPV  | Negative |
| P05090 | VMLLLLLSALAGLFGAAEGQ  | Negative |
| P05090 | QAFHLGKCPNPPVQENFDVN  | Negative |
| P05090 | MVMLLLLLSALAGLFGAAEG  | Negative |
| P05090 | LGKCPNPPVQENFDVNKYLG  | Negative |
| P05090 | AGLFGAAEGQAFHLGKCPNP  | Negative |
| P05090 | ALAGLFGAAEGQAFHLGKCP  | Negative |
| P05090 | AAEGQAFHLGKCPNPPVQEN  | Negative |
| P05090 | KCPNPPVQENFDVNKYLGWRW | Negative |
| P05090 | LSALAGLFGAAEGQAFHLGK  | Negative |
| P05090 | SALAGLFGAAEGQAFHLGKC  | Negative |
| P05090 | FHLGKCPNPPVQENFDVNKY  | Negative |
| P05090 | AEGQAFHLGKCPNPPVQENF  | Negative |
| P05090 | GLFGAAEGQAFHLGKCPNPP  | Negative |
| P05099 | GIFCALPLSLLLLLQSCGVW  | Negative |
| P05099 | GVWGAPPQPRGTLCRTKPTD  | Negative |
| P05099 | FCALPLSLLLLLQSCGVWGA  | Negative |
| P05099 | CALPLSLLLLLQSCGVWGAP  | Negative |
| P05099 | IFCALPLSLLLLLQSCGVWG  | Negative |
| P05099 | LLQSCGVWGAPPQPRGTLCR  | Negative |
| P05099 | VWGAPPQPRGTLCRTKPTDL  | Negative |
| P05099 | MDGIFCALPLSLLLLLQSCG  | Negative |
| P05099 | LQSCGVWGAPPQPRGTLCRT  | Negative |
| P05099 | WGAPPQPRGTLCRTKPTDLV  | Negative |
| P05099 | SCGVWGAPPQPRGTLCRTKP  | Negative |
| P05099 | GTLCRTKPTDLVFIIDSSRS  | Negative |
| P05099 | LLLQSCGVWGAPPQPRGTLC  | Negative |
| P05099 | CGVWGAPPQPRGTLCRTKPT  | Negative |
| P05099 | PPQPRGTLCRTKPTDLVFII  | Negative |
| P05099 | RGTLCRTKPTDLVFIIDSSR  | Negative |
| P05099 | SLLLLLQSCGVWGAPPQPRG  | Negative |
| P05099 | QPRGTLCRTKPTDLVFIIDS  | Negative |
| P05099 | PQPRGTLCRTKPTDLVFIID  | Negative |
| P05099 | GAPPQPRGTLCRTKPTDLVF  | Negative |
| P05099 | QSCGVWGAPPQPRGTLCRTK  | Negative |

|        |                       |          |
|--------|-----------------------|----------|
| P05099 | LPLSLLLLLQSCGVWGAPPQ  | Negative |
| P05099 | LSLLLLLQSCGVWGAPPQPR  | Negative |
| P05099 | APPQPRGTLCRTKPTDLVFI  | Negative |
| P05099 | LLLLQSCGVWGAPPQPRGTL  | Negative |
| P05099 | DGIFCALPLSLLLLLQSCGV  | Negative |
| P05099 | LLLLLQSCGVWGAPPQPRGT  | Negative |
| P05099 | PRGTLCRTKPTDLVFIIDSS  | Negative |
| P05099 | ALPLSLLLLLQSCGVWGAPP  | Negative |
| P05113 | PTSALVKETLALLSTHRTLL  | Negative |
| P05113 | ALGAAYVYAIPTSEPTSALV  | Negative |
| P05113 | LGAAYVYAIPTSEPTSALVK  | Negative |
| P05113 | RMLLHLSLLALGAAYVYAI   | Negative |
| P05113 | LLALGAAYVYAIPTSEPTSA  | Negative |
| P05113 | AYVYAIPTSEPTSALVKETL  | Negative |
| P05113 | AAVYVYAIPTSEPTSALVKET | Negative |
| P05113 | GAAYVYAIPTSEPTSALVKE  | Negative |
| P05113 | SLLALGAAYVYAIPTSEPTS  | Negative |
| P05113 | HLSLLALGAAYVYAIPTSEIP | Negative |
| P05113 | IPTEPTSALVKETLALLST   | Negative |
| P05113 | TSALVKETLALLSTHRTLLI  | Negative |
| P05113 | LLHLSLLALGAAYVYAIPTSE | Negative |
| P05113 | MLLHLSLLALGAAYVYAIPT  | Negative |
| P05113 | PTEPTSALVKETLALLSTH   | Negative |
| P05113 | SALVKETLALLSTHRTLLIA  | Negative |
| P05113 | LSLLALGAAYVYAIPTSEIPT | Negative |
| P05113 | ALVKETLALLSTHRTLLIAN  | Negative |
| P05113 | TEPTSALVKETLALLSTHR   | Negative |
| P05113 | LVKETLALLSTHRTLLIANE  | Negative |
| P05113 | LALGAAYVYAIPTSEPTSAL  | Negative |
| P05113 | YVYAIPTSEPTSALVKETLA  | Negative |
| P05113 | YAIPTSEPTSALVKETLALL  | Negative |
| P05113 | AIPTSEPTSALVKETLALLS  | Negative |
| P05113 | IPTSALVKETLALLSTHRTL  | Negative |
| P05113 | VYAIPTSEPTSALVKETLAL  | Negative |
| P05113 | EPTSALVKETLALLSTHRT   | Negative |
| P05113 | VKETLALLSTHRTLLIANET  | Negative |
| P05113 | MRMLLHLSLLALGAAYVYAI  | Negative |
| P05117 | VIQRNSILLIIIFASSIST   | Negative |
| P05117 | NSILLIIIFASSISTCRSN   | Negative |
| P05117 | IIIFASSISTCRSNVIDDNL  | Negative |
| P05117 | FASSISTCRSNVIDDNLFKQ  | Negative |
| P05117 | IIFASSISTCRSNVIDDNLF  | Negative |
| P05117 | ISTCRSNVIDDNLFKQVYDN  | Negative |
| P05117 | IQRNSILLIIIFASSISTC   | Negative |
| P05117 | TCRSNVIDDNLFKQVYDNIL  | Negative |
| P05117 | SSISTCRSNVIDDNLFKQVY  | Negative |

|        |                      |          |
|--------|----------------------|----------|
| P05117 | MVIQRNSILLLIIFASSIS  | Negative |
| P05117 | DDNLFKQVYDNILEQEFAHD | Negative |
| P05117 | NVIDDNLFKQVYDNILEQEF | Negative |
| P05117 | RNSILLLIIFASSISTCRS  | Negative |
| P05117 | IDDNLFKQVYDNILEQEFAH | Negative |
| P05117 | CRSNVIDDNLFKQVYDNILE | Negative |
| P05117 | STCRSNVIDDNLFKQVYDNI | Negative |
| P05117 | SILLLIIFASSISTCRSNV  | Negative |
| P05117 | SISTCRSNVIDDNLFKQVYD | Negative |
| P05117 | NLFKQVYDNILEQEFAHDFQ | Negative |
| P05117 | QRNSILLLIIFASSISTCR  | Negative |
| P05117 | LLLIIFASSISTCRSNVID  | Negative |
| P05117 | LIIFASSISTCRSNVIDDN  | Negative |
| P05117 | ASSISTCRSNVIDDNLFKQV | Negative |
| P05117 | SNVIDDNLFKQVYDNILEQE | Negative |
| P05117 | DNLFKQVYDNILEQEFAHDF | Negative |
| P05117 | ILLLIIFASSISTCRSNVI  | Negative |
| P05117 | RSNVIDDNLFKQVYDNILEQ | Negative |
| P05117 | IFASSISTCRSNVIDDNLFK | Negative |
| P05117 | VIDDNLFKQVYDNILEQEFA | Negative |
| P05149 | LGVTVYSFAQLANAATLNVK | Negative |
| P05149 | SYGTTQNGQKVDLYTMSNNN | Negative |
| P05149 | AATLNVKSYGTTQNGQKVDL | Negative |
| P05149 | TVYSFAQLANAATLNVKSYG | Negative |
| P05149 | ANAATLNVKSYGTTQNGQKV | Negative |
| P05149 | GTTQNGQKVDLYTMSNNNGV | Negative |
| P05149 | KKLAILGVTVYSFAQLANAA | Negative |
| P05149 | MKKLAILGVTVYSFAQLANA | Negative |
| P05149 | FAQLANAATLNVKSYGTTQN | Negative |
| P05149 | GVTVYSFAQLANAATLNVKS | Negative |
| P05149 | SFAQLANAATLNVKSYGTTQ | Negative |
| P05149 | KSYGTTQNGQKVDLYTMSNN | Negative |
| P05149 | LANAATLNVKSYGTTQNGQK | Negative |
| P05149 | YSFAQLANAATLNVKSYGTT | Negative |
| P05149 | LVKSYGTTQNGQKVDLYTM  | Negative |
| P05149 | TLNVKSYGTTQNGQKVDLYT | Negative |
| P05149 | TTQNGQKVDLYTMSNNNGVS | Negative |
| P05149 | NVKSYGTTQNGQKVDLYTMS | Negative |
| P05149 | YGTTQNGQKVDLYTMSNNNG | Negative |
| P05149 | AILGVTVYSFAQLANAATLN | Negative |
| P05149 | KLAILGVTVYSFAQLANAAT | Negative |
| P05149 | QLANAATLNVKSYGTTQNGQ | Negative |
| P05149 | ATLNVKSYGTTQNGQKVDLY | Negative |
| P05149 | NAATLNVKSYGTTQNGQKVD | Negative |
| P05149 | LAILGVTVYSFAQLANAATL | Negative |
| P05149 | VYSFAQLANAATLNVKSYGT | Negative |

|        |                       |          |
|--------|-----------------------|----------|
| P05149 | VKSYGTTQNGQKVDLYTMSN  | Negative |
| P05149 | AQLANAATLNVKSYGTTQNG  | Negative |
| P05149 | VTVYSFAQLANAATLNVKSY  | Negative |
| P05154 | RVEDLHVGATVAPSSRRDFT  | Negative |
| P05154 | QLFLLLCLVLLSPQGASLHR  | Negative |
| P05154 | GASLHRHHPREMKKRVEDLH  | Negative |
| P05154 | LLCLVLLSPQGASLHRHHPR  | Negative |
| P05154 | QGASLHRHHPREMKKRVEDL  | Negative |
| P05154 | MKKRVEDLHVGATVAPSSRR  | Negative |
| P05154 | CLVLLSPQGASLHRHHPREM  | Negative |
| P05154 | ASLHRHHPREMKKRVEDLHV  | Negative |
| P05154 | PREMKKRVEDLHVGATVAPS  | Negative |
| P05154 | LCLVLLSPQGASLHRHHPRE  | Negative |
| P05154 | LFLLLCLVLLSPQGASLHRH  | Negative |
| P05154 | MQLFLLLCLVLLSPQGASLH  | Negative |
| P05154 | LSPQGASLHRHHPREMKKRV  | Negative |
| P05154 | SLHRHHPREMKKRVEDLHVG  | Negative |
| P05154 | LHRHHPREMKKRVEDLHVG   | Negative |
| P05154 | HHPREMKKRVEDLHVGATVAP | Negative |
| P05154 | KKRVEDLHVGATVAPSSRRD  | Negative |
| P05154 | LVLLSPQGASLHRHHPREM   | Negative |
| P05154 | EMKKRVEDLHVGATVAPSSR  | Negative |
| P05154 | VLLSPQGASLHRHHPREM    | Negative |
| P05154 | REMKKRVEDLHVGATVAPSS  | Negative |
| P05154 | KRVEDLHVGATVAPSSRRDF  | Negative |
| P05154 | HRHHPREMKKRVEDLHVGAT  | Negative |
| P05154 | LLSPQGASLHRHHPREM     | Negative |
| P05154 | FLLLCLVLLSPQGASLHRHH  | Negative |
| P05154 | RHHPREMKKRVEDLHVGATV  | Negative |
| P05154 | SPQGASLHRHHPREM       | Negative |
| P05154 | HHPREMKKRVEDLHVGATVA  | Negative |
| P05154 | PQGASLHRHHPREM        | Negative |
| P05155 | RASSNPATSSSSQDPESLQ   | Negative |
| P05155 | ATSSSSQDPESLQDRGEGKV  | Negative |
| P05155 | NPNATSSSSQDPESLQDRGE  | Negative |
| P05155 | DRASSNPATSSSSQDPESL   | Negative |
| P05155 | LLLLLAGDRASSNPATSSS   | Negative |
| P05155 | GDRASSNPATSSSSQDPES   | Negative |
| P05155 | SNPNATSSSSQDPESLQDRG  | Negative |
| P05155 | SRLTLLTLLLLLAGDRASS   | Negative |
| P05155 | SSNPATSSSSQDPESLQDR   | Negative |
| P05155 | LAGDRASSNPATSSSSQDP   | Negative |
| P05155 | LLLAGDRASSNPATSSSSQ   | Negative |
| P05155 | ASSNPATSSSSQDPESLQD   | Negative |
| P05155 | SSSSQDPESLQDRGEGKVAT  | Negative |
| P05155 | TLLTLLLLLAGDRASSNP    | Negative |

|        |                       |          |
|--------|-----------------------|----------|
| P05155 | ASRLTLLTLLLLLLAGDRAS  | Negative |
| P05155 | LTLLTLLLLLLAGDRASSNP  | Negative |
| P05155 | TSSSSQDPESLQDRGEGKVA  | Negative |
| P05155 | LLAGDRASSNP NATSSSSQD | Negative |
| P05155 | LLLLAGDRASSNP NATSSSS | Negative |
| P05155 | LLTLLLLLLAGDRASSNPNA  | Negative |
| P05155 | SSSQDPESLQDRGEGKVATT  | Negative |
| P05155 | LLLLLLAGDRASSNP NATSS | Negative |
| P05155 | SSQDPESLQDRGEGKVATTV  | Negative |
| P05155 | TLLLLLLAGDRASSNP NATS | Negative |
| P05155 | PNATSSSSQDPESLQDRGEG  | Negative |
| P05155 | RLTLLTLLLLLLAGDRASSN  | Negative |
| P05155 | AGDRASSNP NATSSSSQDPE | Negative |
| P05155 | MASRLTLLTLLLLLLAGDRA  | Negative |
| P05155 | NATSSSSQDPESLQDRGEGK  | Negative |
| P05160 | VENGRIAQYYYTFKSFYFPM  | Negative |
| P05160 | PCGFPHVENGRIAQYYYTFK  | Negative |
| P05160 | IISGELYAEEKPCGFPHVEN  | Negative |
| P05160 | LYAEEKPCGFPHVENGRIAQ  | Negative |
| P05160 | GELYAEEKPCGFPHVENGRI  | Negative |
| P05160 | MRLKNLTFIILIISGELYA   | Negative |
| P05160 | ELYAEEKPCGFPHVENGRIA  | Negative |
| P05160 | FIILIISGELYAEEKPCGF   | Negative |
| P05160 | EKPCGFPHVENGRIAQYYYT  | Negative |
| P05160 | LIISGELYAEEKPCGFPHVE  | Negative |
| P05160 | CGFPHVENGRIAQYYYTFKS  | Negative |
| P05160 | KPCGFPHVENGRIAQYYYTF  | Negative |
| P05160 | ILIISGELYAEEKPCGFPHV  | Negative |
| P05160 | SGELYAEEKPCGFPHVENGR  | Negative |
| P05160 | RLKNLTFIILIISGELYAE   | Negative |
| P05160 | GFPHVENGRIAQYYYTFKSF  | Negative |
| P05160 | HVENGRIAQYYYTFKSFYFP  | Negative |
| P05160 | KNLTFIILIISGELYAEEK   | Negative |
| P05160 | LKNLTFIILIISGELYAEE   | Negative |
| P05160 | IILIISGELYAEEKPCGFPH  | Negative |
| P05160 | TFIILIISGELYAEEKPCG   | Negative |
| P05160 | IIILIISGELYAEEKPCGFP  | Negative |
| P05160 | FPHVENGRIAQYYYTFKSFY  | Negative |
| P05160 | PHVENGRIAQYYYTFKSFYF  | Negative |
| P05160 | AEEKPCGFPHVENGRIAQYY  | Negative |
| P05160 | YAEEKPCGFPHVENGRIAQY  | Negative |
| P05160 | NLTFIILIISGELYAEEKP   | Negative |
| P05160 | EKPCGFPHVENGRIAQYYY   | Negative |
| P05160 | ISGELYAEEKPCGFPHVENG  | Negative |
| P05164 | GVPFFSSLRCMVDLGPCWAG  | Negative |
| P05164 | RCMVDLGPCWAGGLTAEMKL  | Negative |

|        |                      |          |
|--------|----------------------|----------|
| P05164 | WAGGLTAEMKLLLALAGLLA | Negative |
| P05164 | AGGLTAEMKLLLALAGLLAI | Negative |
| P05164 | CMVDLGPCWAGGLTAEMKLL | Negative |
| P05164 | GPCWAGGLTAEMKLLLALAG | Negative |
| P05164 | GLTAEMKLLLALAGLLAILA | Negative |
| P05164 | LRCMVDLGPCWAGGLTAEMK | Negative |
| P05164 | LLALAGLLAILATPQPSEGA | Negative |
| P05164 | SLRCMVDLGPCWAGGLTAEM | Negative |
| P05164 | PCWAGGLTAEMKLLLALAGL | Negative |
| P05164 | MVDLGPCWAGGLTAEMKLLL | Negative |
| P05164 | MKLLLALAGLLAILATPQPS | Negative |
| P05164 | VPFFSSLRCMVDLGPCWAGG | Negative |
| P05164 | LTAEMKLLLALAGLLAILAT | Negative |
| P05164 | TAEMKLLLALAGLLAILATP | Negative |
| P05164 | FSSLRCMVDLGPCWAGGLTA | Negative |
| P05164 | MGVPFFSSLRCMVDLGPCWA | Negative |
| P05164 | LGPCWAGGLTAEMKLLLALA | Negative |
| P05164 | CWAGGLTAEMKLLLALAGLL | Negative |
| P05164 | VDLGPCWAGGLTAEMKLLLA | Negative |
| P05164 | FFSSLRCMVDLGPCWAGGLT | Negative |
| P05164 | AEMKLLLALAGLLAILATPQ | Negative |
| P05164 | SSLRCMVDLGPCWAGGLTAE | Negative |
| P05164 | KLLLALAGLLAILATPQPSE | Negative |
| P05164 | PFFSSLRCMVDLGPCWAGGL | Negative |
| P05164 | GGLTAEMKLLLALAGLLAIL | Negative |
| P05164 | LLLALAGLLAILATPQPSEG | Negative |
| P05164 | EMKLLLALAGLLAILATPQP | Negative |
| P05164 | DLGPCWAGGLTAEMKLLLAL | Negative |
| P05186 | TNSLVPEKEKDPKYWRDQAQ | Negative |
| P05186 | PFLVLAIGTCLTNSLVPEKE | Negative |
| P05186 | WRDQAQETLKYALELQKLNT | Negative |
| P05186 | SLVPEKEKDPKYWRDQAQET | Negative |
| P05186 | LVPEKEKDPKYWRDQAQETL | Negative |
| P05186 | GTCLTNSLVPEKEKDPKYWR | Negative |
| P05186 | VLAIGTCLTNSLVPEKEKDP | Negative |
| P05186 | KDPKYWRDQAQETLKYALEL | Negative |
| P05186 | AIGTCLTNSLVPEKEKDPKY | Negative |
| P05186 | PKYWRDQAQETLKYALELQK | Negative |
| P05186 | LTNSLVPEKEKDPKYWRDQA | Negative |
| P05186 | RDQAQETLKYALELQKLNTN | Negative |
| P05186 | LAIGTCLTNSLVPEKEKDPK | Negative |
| P05186 | IGTCLTNSLVPEKEKDPKYW | Negative |
| P05186 | TCLTNSLVPEKEKDPKYWRD | Negative |
| P05186 | MISPFLVLAIGTCLTNSLVP | Negative |
| P05186 | CLTNSLVPEKEKDPKYWRDQ | Negative |
| P05186 | KYWRDQAQETLKYALELQKL | Negative |

|        |                      |          |
|--------|----------------------|----------|
| P05186 | NSLVPEKEKDPKYWRDQAQE | Negative |
| P05186 | EKEKDPKYWRDQAQETLKYA | Negative |
| P05186 | ISPFLVLAIGTCLTNSLVPE | Negative |
| P05186 | EKDPKYWRDQAQETLKYALE | Negative |
| P05186 | YWRDQAQETLKYALELQKLN | Negative |
| P05186 | LVLAIGTCLTNSLVPEKEKD | Negative |
| P05186 | VPEKEKDPKYWRDQAQETLK | Negative |
| P05186 | FLVLAIGTCLTNSLVPEKEK | Negative |
| P05186 | PEKEKDPKYWRDQAQETLKY | Negative |
| P05186 | DPKYWRDQAQETLKYALELQ | Negative |
| P05186 | KEKDPKYWRDQAQETLKYAL | Negative |
| P05231 | APVPPGEDSKDVAAPHRQPL | Negative |
| P05231 | STSAFGPVAFSLGLLLVLPA | Negative |
| P05231 | VLPAAFPAPVPPGEDSKDVA | Negative |
| P05231 | SFSTSAFGPVAFSLGLLLVL | Negative |
| P05231 | PVPPGEDSKDVAAPHRQPLT | Negative |
| P05231 | LLLVLPAAFPAPVPPGEDSK | Negative |
| P05231 | TSAFGPVAFSLGLLLVLPA  | Negative |
| P05231 | VPPGEDSKDVAAPHRQPLTS | Negative |
| P05231 | LVLPAAFPAPVPPGEDSKDV | Negative |
| P05231 | LGLLLVLPAAFPAPVPPGED | Negative |
| P05231 | GPVAFSLGLLLVLPAAFPAP | Negative |
| P05231 | FSTSAFGPVAFSLGLLLVL  | Negative |
| P05231 | MNSFSTSAFGPVAFSLGLLL | Negative |
| P05231 | PAPVPPGEDSKDVAAPHRQP | Negative |
| P05231 | PAAFPAPVPPGEDSKDVAAP | Negative |
| P05231 | AFPAPVPPGEDSKDVAAPHR | Negative |
| P05231 | AFSLGLLLVLPAAFPAPVPP | Negative |
| P05231 | FGPVAFSLGLLLVLPAAFP  | Negative |
| P05231 | NSFSTSAFGPVAFSLGLLL  | Negative |
| P05231 | LPAAFPAPVPPGEDSKDVAA | Negative |
| P05231 | FPAPVPPGEDSKDVAAPHRQ | Negative |
| P05231 | LLVLPAAFPAPVPPGEDSKD | Negative |
| P05231 | FSLGLLLVLPAAFPAPVPPG | Negative |
| P05231 | GLLLVLPAAFPAPVPPGEDS | Negative |
| P05231 | PVAFSLGLLLVLPAAFPAPV | Negative |
| P05231 | VAFSLGLLLVLPAAFPAPVP | Negative |
| P05231 | AFGPVAFSLGLLLVLPAAFP | Negative |
| P05231 | AAFPAPVPPGEDSKDVAAPH | Negative |
| P05231 | SAFGPVAFSLGLLLVLPAAF | Negative |
| P05305 | QGAPETAVLGAELSAVGENG | Negative |
| P05305 | LGAELSAVGENGGEKPTPSP | Negative |
| P05305 | APETAVLGAELSAVGENGGE | Negative |
| P05305 | LLMIFSLLFVACQGAPETAV | Negative |
| P05305 | MDYLLMIFSLLFVACQGAPE | Negative |
| P05305 | IFSLLFVACQGAPETAVLGA | Negative |



|        |                       |          |
|--------|-----------------------|----------|
| P05305 | DYLLMIFSLLFVACQGAPET  | Negative |
| P05305 | CQGAPETAVLGAELSAVGEN  | Negative |
| P05305 | ELSAVGENGGEKPTSPPPWR  | Negative |
| P05305 | SLLFVACQGAPETAVLGAEL  | Negative |
| P05305 | AELSAVGENGGEKPTSPPPW  | Negative |
| P05305 | SAVGENGGEKPTSPPPWRLR  | Negative |
| P05305 | LLFVACQGAPETAVLGAELS  | Negative |
| P05305 | VLGAELSAVGENGGEKPTPS  | Negative |
| P05305 | VACQGAPETAVLGAELSAVG  | Negative |
| P05305 | ETAVLGAELSAVGENGGEKP  | Negative |
| P05305 | PETAVLGAELSAVGENGGEK  | Negative |
| P05305 | AVGENGGEKPTSPPPWRLRR  | Negative |
| P05305 | LMIFSLLFVACQGAPETAVL  | Negative |
| P05305 | AVLGAELSAVGENGGEKPTP  | Negative |
| P05305 | LFVACQGAPETAVLGAELSA  | Negative |
| P05305 | TAVLGAELSAVGENGGEKPT  | Negative |
| P05305 | ACQGAPETAVLGAELSAVGE  | Negative |
| P05305 | LSAVGENGGEKPTSPPPWRL  | Negative |
| P05305 | MIFSLLFVACQGAPETAVLG  | Negative |
| P05305 | GAPETAVLGAELSAVGENG   | Negative |
| P05305 | FVACQGAPETAVLGAELSAV  | Negative |
| P05305 | FSLLFVACQGAPETAVLGAEL | Negative |
| P05305 | GAELSAVGENGGEKPTSPPP  | Negative |
| P05307 | LVLHKGNFDEALAAHKYLLV  | Negative |
| P05307 | MLRRALLCLALTALFRAGAG  | Negative |
| P05307 | LALTALFRAGAGAPDEEDHV  | Negative |
| P05307 | APDEEDHVLVLHKGNFDEAL  | Negative |
| P05307 | GAGAPDEEDHVLVLHKGNFD  | Negative |
| P05307 | RRALLCLALTALFRAGAGAP  | Negative |
| P05307 | HVLVLHKGNFDEALAAHKYL  | Negative |
| P05307 | DEEDHVLVLHKGNFDEALAA  | Negative |
| P05307 | RAGAGAPDEEDHVLVLHKGN  | Negative |
| P05307 | CLALTALFRAGAGAPDEEDH  | Negative |
| P05307 | FRAGAGAPDEEDHVLVLHKG  | Negative |
| P05307 | RALLCLALTALFRAGAGAPD  | Negative |
| P05307 | LRRALLCLALTALFRAGAGA  | Negative |
| P05307 | VLHKGNFDEALAAHKYLLVE  | Negative |
| P05307 | VLVLHKGNFDEALAAHKYLL  | Negative |
| P05307 | ALFRAGAGAPDEEDHVLVLH  | Negative |
| P05307 | AGAGAPDEEDHVLVLHKGNF  | Negative |
| P05307 | LTALFRAGAGAPDEEDHVLV  | Negative |
| P05307 | ALLCLALTALFRAGAGAPDE  | Negative |
| P05307 | PDEEDHVLVLHKGNFDEALA  | Negative |
| P05307 | DHVLVLHKGNFDEALAAHKY  | Negative |
| P05307 | EEDHVLVLHKGNFDEALAAH  | Negative |
| P05307 | LFRAGAGAPDEEDHVLVLHK  | Negative |

|        |                       |          |
|--------|-----------------------|----------|
| P05307 | LCLALTALFRAGAGAPDEED  | Negative |
| P05307 | GAPDEEDHVLVLHKGNFDEA  | Negative |
| P05307 | AGAPDEEDHVLVLHKGNFDE  | Negative |
| P05307 | TALFRAGAGAPDEEDHVLVL  | Negative |
| P05307 | ALTALFRAGAGAPDEEDHVL  | Negative |
| P05307 | EDHVLVLHKGNFDEALAAHK  | Negative |
| P05366 | AFQGAGDMWRAYTDMKEANW  | Negative |
| P05366 | SLVFCSLLLGVCHGGFFSFV  | Negative |
| P05366 | GFFSFVHEAFQGAGDMWRAY  | Negative |
| P05366 | SFVHEAFQGAGDMWRAYTDM  | Negative |
| P05366 | LTSLVFCSLLLGVCHGGFFS  | Negative |
| P05366 | FSFVHEAFQGAGDMWRAYTD  | Negative |
| P05366 | CSLLGVCHGGFFSFVHEAF   | Negative |
| P05366 | EAFQGAGDMWRAYTDMKEAN  | Negative |
| P05366 | QGAGDMWRAYTDMKEANWKN  | Negative |
| P05366 | LLGVCHGGFFSFVHEAFQG   | Negative |
| P05366 | FQGAGDMWRAYTDMKEANWK  | Negative |
| P05366 | FFSFVHEAFQGAGDMWRAYT  | Negative |
| P05366 | SLLGVCHGGFFSFVHEAFQ   | Negative |
| P05366 | GVCHGGFFSFVHEAFQGAGD  | Negative |
| P05366 | LGVCHGGFFSFVHEAFQGAG  | Negative |
| P05366 | LLTSLVFCSLLLGVCHGGFF  | Negative |
| P05366 | VCHGGFFSFVHEAFQGAGDM  | Negative |
| P05366 | GGFFSFVHEAFQGAGDMWRA  | Negative |
| P05366 | VHEAFQGAGDMWRAYTDMKE  | Negative |
| P05366 | FCSLLGVCHGGFFSFVHEA   | Negative |
| P05366 | LVFCSLLLGVCHGGFFSFVH  | Negative |
| P05366 | VFCSLLLGVCHGGFFSFVHE  | Negative |
| P05366 | FVHEAFQGAGDMWRAYTDMK  | Negative |
| P05366 | KLLTSLVFCSLLLGVCHGGF  | Negative |
| P05366 | HGGFFSFVHEAFQGAGDMWR  | Negative |
| P05366 | MKLLTSLVFCSLLLGVCHGG  | Negative |
| P05366 | LLGVCHGGFFSFVHEAFQGA  | Negative |
| P05366 | CHGGFFSFVHEAFQGAGDMW  | Negative |
| P05366 | HEAFQGAGDMWRAYTDMKEA  | Negative |
| P05371 | VALLLTWDNGMVLGEQEFS   | Negative |
| P05371 | ELQELSTQGSRYVNKEIQNA  | Negative |
| P05371 | DNGMVLGEQEFS DNELQELS | Negative |
| P05371 | NGMVLGEQEFS DNELQELST | Negative |
| P05371 | MVLGEQEFS DNELQELSTQG | Negative |
| P05371 | LLCVALLLTWDNGMVLGEQE  | Negative |
| P05371 | GMVLGEQEFS DNELQELSTQ | Negative |
| P05371 | VLGEQEFS DNELQELSTQGS | Negative |
| P05371 | LLTWDNGMVLGEQEFS DNEL | Negative |
| P05371 | EQEFS DNELQELSTQGSRYV | Negative |
| P05371 | LTWDNGMVLGEQEFS DNELQ | Negative |

|        |                       |          |
|--------|-----------------------|----------|
| P05371 | TWDNGMVLGEQEFSDELQ    | Negative |
| P05371 | DELQELSTQGSRYVNKEIQ   | Negative |
| P05371 | ALLLTWDNGMVLGEQEFSDEL | Negative |
| P05371 | FSDELQELSTQGSRYVNKE   | Negative |
| P05371 | LLLTWDNGMVLGEQEFSDEL  | Negative |
| P05371 | KILLLCVALLLTWDNGMVLG  | Negative |
| P05371 | LCVALLLTWDNGMVLGEQEF  | Negative |
| P05371 | ILLLCVALLLTWDNGMVLGE  | Negative |
| P05371 | LLLCVALLLTWDNGMVLGEQ  | Negative |
| P05371 | NELQELSTQGSRYVNKEIQN  | Negative |
| P05371 | WDNGMVLGEQEFSDELQEL   | Negative |
| P05371 | LGEQEFSDELQELSTQGS    | Negative |
| P05371 | SDNELQELSTQGSRYVNKEI  | Negative |
| P05371 | GEQEFSDELQELSTQGSRY   | Negative |
| P05371 | EFSDNELQELSTQGSRYVNK  | Negative |
| P05371 | LQELSTQGSRYVNKEIQNAV  | Negative |
| P05371 | QEFSDELQELSTQGSRYVN   | Negative |
| P05371 | MKILLLCVALLLTWDNGMVL  | Negative |
| P05408 | TPAFAYSPRTPDRVSEADIQ  | Negative |
| P05408 | RTPDRVSEADIQRLHGVME   | Negative |
| P05408 | MVSRMVSTMLSGLLFWLASG  | Negative |
| P05408 | SGWTPAFAYSPRTPDRVSEA  | Negative |
| P05408 | ASGWTPAFAYSPRTPDRVSE  | Negative |
| P05408 | GWTPAFAYSPRTPDRVSEAD  | Negative |
| P05408 | WLASGWTPAFAYSPRTPDRV  | Negative |
| P05408 | PAFAYSPRTPDRVSEADIQ   | Negative |
| P05408 | FAYSPRTPDRVSEADIQRL   | Negative |
| P05408 | LFWLASGWTPAFAYSPRTPD  | Negative |
| P05408 | PRTPDRVSEADIQRLHGV    | Negative |
| P05408 | SPRTPDRVSEADIQRLHGV   | Negative |
| P05408 | RMVSTMLSGLLFWLASGWTP  | Negative |
| P05408 | SRMVSTMLSGLLFWLASGWT  | Negative |
| P05408 | LASGWTPAFAYSPRTPDRVS  | Negative |
| P05408 | VSRMVSTMLSGLLFWLASGW  | Negative |
| P05408 | STMLSGLLFWLASGWTPAFA  | Negative |
| P05408 | YSPRTPDRVSEADIQRLHG   | Negative |
| P05408 | LLFWLASGWTPAFAYSPRTP  | Negative |
| P05408 | AFAYSPRTPDRVSEADIQRL  | Negative |
| P05408 | VSTMLSGLLFWLASGWTPAF  | Negative |
| P05408 | SGLLFWLASGWTPAFAYSPR  | Negative |
| P05408 | FWLASGWTPAFAYSPRTPDR  | Negative |
| P05408 | TMLSGLLFWLASGWTPAFAY  | Negative |
| P05408 | MLSGLLFWLASGWTPAFAYS  | Negative |
| P05408 | MVSTMLSGLLFWLASGWTPA  | Negative |
| P05408 | LSGLLFWLASGWTPAFAYSP  | Negative |
| P05408 | AYSPRTPDRVSEADIQRLH   | Negative |

|        |                      |          |
|--------|----------------------|----------|
| P05408 | WTPAFAYSPRTPDRVSEADI | Negative |
| P05451 | SQGQEAQTELPQARISCPEG | Negative |
| P05451 | AQTSSYFMLISCLMFLSQSQ | Negative |
| P05451 | LPQARISCPEGTNAYRSYCY | Negative |
| P05451 | LISCLMFLSQSQGQEAQTEL | Negative |
| P05451 | QTELPQARISCPEGTNAYRS | Negative |
| P05451 | MAQTSSYFMLISCLMFLSQS | Negative |
| P05451 | TSSYFMLISCLMFLSQSQGQ | Negative |
| P05451 | TELPQARISCPEGTNAYRSY | Negative |
| P05451 | SCLMFLSQSQGQEAQTELPQ | Negative |
| P05451 | SYFMLISCLMFLSQSQGQEA | Negative |
| P05451 | QGQEAQTELPQARISCPEGT | Negative |
| P05451 | LSQSQGQEAQTELPQARISC | Negative |
| P05451 | SQSQGQEAQTELPQARISCP | Negative |
| P05451 | GQEAQTELPQARISCPEGTN | Negative |
| P05451 | YFMLISCLMFLSQSQGQEAQ | Negative |
| P05451 | ELPQARISCPEGTNAYRSYC | Negative |
| P05451 | QEAQTELPQARISCPEGTNA | Negative |
| P05451 | FLSQSQGQEAQTELPQARIS | Negative |
| P05451 | AQTELPQARISCPEGTNAYR | Negative |
| P05451 | QSQGQEAQTELPQARISCPE | Negative |
| P05451 | ISCLMFLSQSQGQEAQTELP | Negative |
| P05451 | SSYFMLISCLMFLSQSQGQE | Negative |
| P05451 | EAQTELPQARISCPEGTNAY | Negative |
| P05451 | MFLSQSQGQEAQTELPQARI | Negative |
| P05451 | QTSSYFMLISCLMFLSQSQG | Negative |
| P05451 | PQARISCPEGTNAYRSYCY  | Negative |
| P05451 | LMFLSQSQGQEAQTELPQAR | Negative |
| P05451 | MLISCLMFLSQSQGQEAQTE | Negative |
| P05451 | CLMFLSQSQGQEAQTELPQA | Negative |
| P05452 | PTQKPKKIVNAKKDVVNTKM | Negative |
| P05452 | MELWGAYLLLCLFSLLTQVT | Negative |
| P05452 | LLLCLFSLLTQVTTEPPTQK | Negative |
| P05452 | KIVNAKKDVVNTKMFELKS  | Negative |
| P05452 | LLCLFSLLTQVTTEPPTQKP | Negative |
| P05452 | QKPKKIVNAKKDVVNTKMF  | Negative |
| P05452 | SLLTQVTTEPPTQKPKKIVN | Negative |
| P05452 | LLTQVTTEPPTQKPKKIVNA | Negative |
| P05452 | LWGAYLLLCLFSLLTQVTTE | Negative |
| P05452 | TQVTTEPPTQKPKKIVNAKK | Negative |
| P05452 | AYLLLCLFSLLTQVTTEPPT | Negative |
| P05452 | ELWGAYLLLCLFSLLTQVTT | Negative |
| P05452 | QVTTEPPTQKPKKIVNAKKD | Negative |
| P05452 | TQKPKKIVNAKKDVVNTKMF | Negative |
| P05452 | EPPTQKPKKIVNAKKDVVNT | Negative |
| P05452 | KPKKIVNAKKDVVNTKMFEE | Negative |

|        |                       |          |
|--------|-----------------------|----------|
| P05452 | LCLFSLLTQVTTEPPTQKPK  | Negative |
| P05452 | PKKIVNAKKDVVNTKMFEEEL | Negative |
| P05452 | WGAYLLLCLFSLLTQVTTEP  | Negative |
| P05452 | LFSLLTQVTTEPPTQKPKKI  | Negative |
| P05452 | KKIVNAKKDVVNTKMFEEELK | Negative |
| P05452 | TTEPPTQKPKKIVNAKKDVV  | Negative |
| P05452 | FSLLTQVTTEPPTQKPKKIV  | Negative |
| P05452 | CLFSLLTQVTTEPPTQKPKK  | Negative |
| P05452 | VTTEPPTQKPKKIVNAKKDV  | Negative |
| P05452 | LTQVTTEPPTQKPKKIVNAK  | Negative |
| P05452 | TEPPTQKPKKIVNAKKDVVN  | Negative |
| P05452 | PPTQKPKKIVNAKKDVVNTK  | Negative |
| P05452 | GAYLLLCLFSLLTQVTTEPP  | Negative |
| P05533 | GLECYQCYGVPFETSCPSIT  | Negative |
| P05533 | ILLVALLCAERAQGLECYQC  | Negative |
| P05533 | LECYQCYGVPFETSCPSITC  | Negative |
| P05533 | YQCYGVPFETSCPSITCPYP  | Negative |
| P05533 | ECYQCYGVPFETSCPSITCP  | Negative |
| P05533 | AERAQGLECYQCYGVPFETS  | Negative |
| P05533 | QGLECYQCYGVPFETSCPSI  | Negative |
| P05533 | ERAQGLECYQCYGVPFETSC  | Negative |
| P05533 | SHTTKSCLLILLVALLCAER  | Negative |
| P05533 | TSHTTKSCLLILLVALLCAE  | Negative |
| P05533 | LCAERAQGLECYQCYGVPF   | Negative |
| P05533 | ALLCAERAQGLECYQCYGVP  | Negative |
| P05533 | DTSHTTKSCLLILLVALLCA  | Negative |
| P05533 | CLLILLVALLCAERAQGLEC  | Negative |
| P05533 | MDTSHTTKSCLLILLVALLC  | Negative |
| P05533 | CYQCYGVPFETSCPSITCPY  | Negative |
| P05533 | LLCAERAQGLECYQCYGVPF  | Negative |
| P05533 | TTKSCLLILLVALLCAERAQ  | Negative |
| P05533 | AQGLECYQCYGVPFETSCPS  | Negative |
| P05533 | TKSCLLILLVALLCAERAQG  | Negative |
| P05533 | SCLLILLVALLCAERAQGLE  | Negative |
| P05533 | LLILLVALLCAERAQGLECY  | Negative |
| P05533 | HTTKSCLLILLVALLCAERA  | Negative |
| P05533 | LVALLCAERAQGLECYQCYG  | Negative |
| P05533 | RAQGLECYQCYGVPFETSCP  | Negative |
| P05533 | LLVALLCAERAQGLECYQCY  | Negative |
| P05533 | KSCLLILLVALLCAERAQGL  | Negative |
| P05533 | CAERAQGLECYQCYGVPFET  | Negative |
| P05533 | VALLCAERAQGLECYQCYGV  | Negative |
| P05543 | TIHCASPEGKVTACHSSQPN  | Negative |
| P05543 | LVLLVLGLHATIHASPEGK   | Negative |
| P05543 | SPFLYLVLGLHATIHCA     | Negative |
| P05543 | VLLVLGLHATIHASPEGKV   | Negative |

|        |                       |          |
|--------|-----------------------|----------|
| P05543 | GKVTACHSSQPNATLYKMSS  | Negative |
| P05543 | LLVLGLHATIHICASPEGKVT | Negative |
| P05543 | ATIHICASPEGKVTACHSSQP | Negative |
| P05543 | MSPFLYLVLVLGLHATIHCH  | Negative |
| P05543 | LYLVLVLGLHATIHCHASPE  | Negative |
| P05543 | CHSSQPNATLYKMSSINADF  | Negative |
| P05543 | PEGKVTACHSSQPNATLYKM  | Negative |
| P05543 | SPEGKVTACHSSQPNATLYK  | Negative |
| P05543 | ACHSSQPNATLYKMSSINAD  | Negative |
| P05543 | GLHATIHICASPEGKVTACHS | Negative |
| P05543 | LVLGLHATIHICASPEGKVT  | Negative |
| P05543 | TACHSSQPNATLYKMSSINA  | Negative |
| P05543 | PFLYLVLVLGLHATIHCHAS  | Negative |
| P05543 | HATIHICASPEGKVTACHSSQ | Negative |
| P05543 | LGLHATIHICASPEGKVTACH | Negative |
| P05543 | HCASPEGKVTACHSSQPNAT  | Negative |
| P05543 | KVTACHSSQPNATLYKMSSI  | Negative |
| P05543 | ASPEGKVTACHSSQPNATLY  | Negative |
| P05543 | CASPEGKVTACHSSQPNATL  | Negative |
| P05543 | IHCASPEGKVTACHSSQPNA  | Negative |
| P05543 | VTACHSSQPNATLYKMSSIN  | Negative |
| P05543 | FLYLVLVLGLHATIHCHASP  | Negative |
| P05543 | LHATIHICASPEGKVTACHSS | Negative |
| P05543 | EGKVTACHSSQPNATLYKMS  | Negative |
| P05543 | VLGLHATIHICASPEGKVTAC | Negative |
| P05545 | LPHEDQGKGRQLHSLTLASI  | Negative |
| P05545 | DGILGRDTLPHEDQGKGRQL  | Negative |
| P05545 | CDGILGRDTLPHEDQGKGRQ  | Negative |
| P05545 | VLCDGILGRDTLPHEDQKG   | Negative |
| P05545 | PAVLCDGILGRDTLPHEDQG  | Negative |
| P05545 | LMAGICPAVLCDGILGRDTL  | Negative |
| P05545 | AGICPAVLCDGILGRDTLPH  | Negative |
| P05545 | PHEDQGKGRQLHSLTLASIN  | Negative |
| P05545 | CPAVLCDGILGRDTLPHEDQ  | Negative |
| P05545 | DTLPHEDQGKGRQLHSLTLA  | Negative |
| P05545 | RDTLPHEDQGKGRQLHSLTL  | Negative |
| P05545 | GILGRDTLPHEDQGKGRQLH  | Negative |
| P05545 | AFIAALGLLMAGICPAVLCD  | Negative |
| P05545 | IAALGLLMAGICPAVLCDGI  | Negative |
| P05545 | ICPAVLCDGILGRDTLPHED  | Negative |
| P05545 | TLPHEDQGKGRQLHSLTLAS  | Negative |
| P05545 | MAFIAALGLLMAGICPAVLC  | Negative |
| P05545 | AALGLLMAGICPAVLCDGIL  | Negative |
| P05545 | MAGICPAVLCDGILGRDTLP  | Negative |
| P05545 | GLLMAGICPAVLCDGILGRD  | Negative |
| P05545 | ILGRDTLPHEDQGKGRQLHS  | Negative |

|        |                      |          |
|--------|----------------------|----------|
| P05545 | LLMAGICPAVLCDGILGRDT | Negative |
| P05545 | LGRDTLPHEHQGKGRQLHSL | Negative |
| P05545 | AVLCDGILGRDTLPHEHQGK | Negative |
| P05545 | GICPAVLCDGILGRDTLPHE | Negative |
| P05545 | GRDTLPHEHQGKGRQLHSLT | Negative |
| P05545 | FIAALGLLMAGICPAVLCDG | Negative |
| P05545 | LGLLMAGICPAVLCDGILGR | Negative |
| P05545 | LCDGILGRDTLPHEHQGKGR | Negative |
| P05546 | IFLIITSAWGGSKGPLDQLE | Negative |
| P05546 | SAWGGSKGPLDQLEKGGETA | Negative |
| P05546 | KHSLNALLIFLIITSAWGG  | Negative |
| P05546 | KGPLDQLEKGGETAQSADPQ | Negative |
| P05546 | ITSAWGGSKGPLDQLEKGGE | Negative |
| P05546 | KGGETAQSADPQWEQLNNKN | Negative |
| P05546 | LIITSAWGGSKGPLDQLEKG | Negative |
| P05546 | SKGPLDQLEKGGETAQSADP | Negative |
| P05546 | WGGSKGPLDQLEKGGETAQS | Negative |
| P05546 | HSLNALLIFLIITSAWGGSK | Negative |
| P05546 | FLIITSAWGGSKGPLDQLEK | Negative |
| P05546 | GGSKGPLDQLEKGGETAQSA | Negative |
| P05546 | LLIFLIITSAWGGSKGPLDQ | Negative |
| P05546 | SLNALLIFLIITSAWGGSKG | Negative |
| P05546 | TSAWGGSKGPLDQLEKGGET | Negative |
| P05546 | ALLIFLIITSAWGGSKGPLD | Negative |
| P05546 | NALLIFLIITSAWGGSKGPL | Negative |
| P05546 | IITSAWGGSKGPLDQLEKGG | Negative |
| P05546 | LDQLEKGGETAQSADPQWEQ | Negative |
| P05546 | AWGGSKGPLDQLEKGGETAQ | Negative |
| P05546 | GSKGPLDQLEKGGETAQSAD | Negative |
| P05546 | QLEKGGETAQSADPQWEQLN | Negative |
| P05546 | DQLEKGGETAQSADPQWEQL | Negative |
| P05546 | MKHSLNALLIFLIITSAWGG | Negative |
| P05546 | EKGGETAQSADPQWEQLNNK | Negative |
| P05546 | PLDQLEKGGETAQSADPQWE | Negative |
| P05546 | GPLDQLEKGGETAQSADPQW | Negative |
| P05546 | LEKGGETAQSADPQWEQLNN | Negative |
| P05546 | LIFLIITSAWGGSKGPLDQL | Negative |
| P05560 | LVLLSLVLCCFPDTAFGVEV | Negative |
| P05560 | SLVLCCFPDTAFGVEVDCSK | Negative |
| P05560 | SVLVLLSLVLCCFPDTAFGV | Negative |
| P05560 | DTAFGVEVDCSKYPNTTNE  | Negative |
| P05560 | GVEVDCSKYPNTTNE      | Negative |
| P05560 | CFPDTAFGVEVDCSKYPNTT | Negative |
| P05560 | VEVDCSKYPNTTNE       | Negative |
| P05560 | TMASVLVLLSLVLCCFPDTA | Negative |
| P05560 | VLCCFPDTAFGVEVDCSKYP | Negative |

|        |                       |          |
|--------|-----------------------|----------|
| P05560 | VLVLLSLVLCCFPDTAFGVE  | Negative |
| P05560 | SKYPNTTNEDGKEVLLCPKI  | Negative |
| P05560 | AFGVEVDCSKYPNTTNEDGK  | Negative |
| P05560 | MASVLVLLSLVLCCFPDTAF  | Negative |
| P05560 | DCSKYPNTTNEDGKEVLLCP  | Negative |
| P05560 | ASVLVLLSLVLCCFPDTAFG  | Negative |
| P05560 | KYPNTTNEDGKEVLLCPKIL  | Negative |
| P05560 | MTMASVLVLLSLVLCCFPDT  | Negative |
| P05560 | LCCFPDTAFGVEVDCSKYPN  | Negative |
| P05560 | FPDTAFGVEVDCSKYPNTTN  | Negative |
| P05560 | PDTAFGVEVDCSKYPNTTNE  | Negative |
| P05560 | CCFPDTAFGVEVDCSKYPNT  | Negative |
| P05560 | FGVEVDCSKYPNTTNEDGKE  | Negative |
| P05560 | TAFGVEVDCSKYPNTTNEDG  | Negative |
| P05560 | VDCSKYPNTTNEDGKEVLLC  | Negative |
| P05560 | CSKYPNTTNEDGKEVLLCPK  | Negative |
| P05560 | VLLSLVLCCFPDTAFGVEVD  | Negative |
| P05560 | LSLVLCCFPDTAFGVEVDCS  | Negative |
| P05560 | LVLCCFPDTAFGVEVDCSKY  | Negative |
| P05560 | EVDCKYPNTTNEDGKEVLL   | Negative |
| P05623 | LALFLVLCVLGLVQSWERP   | Negative |
| P05623 | VCVLGLVQSWERPWNRKPTK  | Negative |
| P05623 | LVCVLGLVQSWERPWNRKPT  | Negative |
| P05623 | RKPTKFPIPSNPRDKWCRL   | Negative |
| P05623 | LVLVLCVLGLVQSWERPWNRK | Negative |
| P05623 | VLVLCVLGLVQSWERPWNRKP | Negative |
| P05623 | LGLVQSWERPWNRKPTKFPI  | Negative |
| P05623 | VLGLVQSWERPWNRKPTKFP  | Negative |
| P05623 | TLALFLVLCVLGLVQSWEW   | Negative |
| P05623 | WERPWNRKPTKFPIPSNPR   | Negative |
| P05623 | GLVQSWERPWNRKPTKFPIP  | Negative |
| P05623 | LVQSWERPWNRKPTKFPIPS  | Negative |
| P05623 | PWNRKPTKFPIPSNPRDKW   | Negative |
| P05623 | EWPWNRKPTKFPIPSNPRD   | Negative |
| P05623 | WNRKPTKFPIPSNPRDKWC   | Negative |
| P05623 | WPWNRKPTKFPIPSNPRDK   | Negative |
| P05623 | TKFPIPSNPRDKWCRLNLG   | Negative |
| P05623 | NRKPTKFPIPSNPRDKWCR   | Negative |
| P05623 | KTLALFLVLCVLGLVQSWE   | Negative |
| P05623 | CVLGLVQSWERPWNRKPTKF  | Negative |
| P05623 | FLVLVLCVLGLVQSWERPWNR | Negative |
| P05623 | QSWERPWNRKPTKFPIPSN   | Negative |
| P05623 | PTKFPIPSNPRDKWCRLNL   | Negative |
| P05623 | KPTKFPIPSNPRDKWCRLN   | Negative |
| P05623 | MKTLALFLVLCVLGLVQSW   | Negative |
| P05623 | VQSWERPWNRKPTKFPIPS   | Negative |



|        |                       |          |
|--------|-----------------------|----------|
| P05623 | KFPIPSPNPRDKWCRLNLGP  | Negative |
| P05623 | SWEWPWNRKPTKFPIPSNP   | Negative |
| P05623 | LFLVLVCVLGLVQSWERPWN  | Negative |
| P05695 | AISAQSLAGTVTTDGADIVI  | Negative |
| P05695 | GTVTTDGADIVIKTKGGLEV  | Negative |
| P05695 | SLLGLAISAQSLAGTVTTDG  | Negative |
| P05695 | MIRRHCKGVGSSVAWSLLG   | Negative |
| P05695 | AGTVTTDGADIVIKTKGGLE  | Negative |
| P05695 | LLGLAISAQSLAGTVTTDGA  | Negative |
| P05695 | SAQSLAGTVTTDGADIVIKT  | Negative |
| P05695 | RRHCKGVGSSVAWSLLGLA   | Negative |
| P05695 | HCKGVGSSVAWSLLGLAIS   | Negative |
| P05695 | WSLLGLAISAQSLAGTVTTD  | Negative |
| P05695 | VAWSLLGLAISAQSLAGTVT  | Negative |
| P05695 | GLAISAQSLAGTVTTDGADI  | Negative |
| P05695 | VGSSVAWSLLGLAISAQSLA  | Negative |
| P05695 | QSLAGTVTTDGADIVIKTKG  | Negative |
| P05695 | SVAWSLLGLAISAQSLAGTV  | Negative |
| P05695 | AQSLAGTVTTDGADIVIKTK  | Negative |
| P05695 | SLAGTVTTDGADIVIKTKGG  | Negative |
| P05695 | IRRHCKGVGSSVAWSLLGL   | Negative |
| P05695 | SSVAWSLLGLAISAQSLAGT  | Negative |
| P05695 | GVGSSVAWSLLGLAISAQSL  | Negative |
| P05695 | SCKGVGSSVAWSLLGLAISA  | Negative |
| P05695 | LAISAQSLAGTVTTDGADIV  | Negative |
| P05695 | LGLAISAQSLAGTVTTDGAD  | Negative |
| P05695 | KGVGSSVAWSLLGLAISAQS  | Negative |
| P05695 | LAGTVTTDGADIVIKTKGGL  | Negative |
| P05695 | RHCKGVGSSVAWSLLGLAI   | Negative |
| P05695 | GSSVAWSLLGLAISAQSLAG  | Negative |
| P05695 | ISAQSLAGTVTTDGADIVIK  | Negative |
| P05695 | CKGVGSSVAWSLLGLAISAQ  | Negative |
| P05790 | EDYFGSDVTVQSSNTTDEII  | Negative |
| P05790 | ALQYVAYTNANINDFEDEDYF | Negative |
| P05790 | DYFGSDVTVQSSNTTDEIIR  | Negative |
| P05790 | ILCCALQYVAYTNANINDFD  | Negative |
| P05790 | LCCALQYVAYTNANINDFDE  | Negative |
| P05790 | FDEYFGSDVTVQSSNTTDE   | Negative |
| P05790 | TNANINDFEDEDYFGSDVTVQ | Negative |
| P05790 | TFVILCCALQYVAYTNANIN  | Negative |
| P05790 | YTNANINDFEDEDYFGSDVTV | Negative |
| P05790 | QYVAYTNANINDFEDEDYFGS | Negative |
| P05790 | CALQYVAYTNANINDFEDEDY | Negative |
| P05790 | NINDFEDEDYFGSDVTVQSSN | Negative |
| P05790 | NDFEDEDYFGSDVTVQSSNTT | Negative |
| P05790 | AYTNANINDFEDEDYFGSDVT | Negative |

|        |                        |          |
|--------|------------------------|----------|
| P05790 | VAYTNANINDFDEDEDYFGSDV | Negative |
| P05790 | YFGSDVTVQSSNTTDEIIRD   | Negative |
| P05790 | DFDEDEDYFGSDVTVQSSNTTD | Negative |
| P05790 | CCALQYVAYTNANINDFDED   | Negative |
| P05790 | LQYVAYTNANINDFDEDEDYFG | Negative |
| P05790 | ANINDFDEDEDYFGSDVTVQSS | Negative |
| P05790 | YVAYTNANINDFDEDEDYFGSD | Negative |
| P05790 | FVILCCALQYVAYTNANIND   | Negative |
| P05790 | DEDYFGSDVTVQSSNTTDEI   | Negative |
| P05790 | NANINDFDEDEDYFGSDVTVQS | Negative |
| P05790 | RVKTFVILCCALQYVAYTNA   | Negative |
| P05790 | KTFVILCCALQYVAYTNANI   | Negative |
| P05790 | INDFDEDEDYFGSDVTVQSSNT | Negative |
| P05790 | MRVKTFVILCCALQYVAYTN   | Negative |
| P05790 | VKTFVILCCALQYVAYTNAN   | Negative |
| P06111 | YIRNGNIYTHEGQWAAEVGA   | Negative |
| P06111 | NIYTHEGQWAAEVGAFGSTD   | Negative |
| P06111 | ASLIAGNALAAQTYIRNGNI   | Negative |
| P06111 | AGNALAAQTYIRNGNIYTHE   | Negative |
| P06111 | NALAAQTYIRNGNIYTHEGQ   | Negative |
| P06111 | IAGNALAAQTYIRNGNIYTH   | Negative |
| P06111 | AQTYIRNGNIYTHEGQWAAE   | Negative |
| P06111 | ALAAQTYIRNGNIYTHEGQW   | Negative |
| P06111 | SLIAGNALAAQTYIRNGNIY   | Negative |
| P06111 | RNGNIYTHEGQWAAEVGAFG   | Negative |
| P06111 | NGNIYTHEGQWAAEVGAFGS   | Negative |
| P06111 | IYTHEGQWAAEVGAFGSTD    | Negative |
| P06111 | TASLIAGNALAAQTYIRNGN   | Negative |
| P06111 | GNIYTHEGQWAAEVGAFGST   | Negative |
| P06111 | IALFITASLIAGNALAAQTY   | Negative |
| P06111 | TYIRNGNIYTHEGQWAAEVG   | Negative |
| P06111 | GNALAAQTYIRNGNIYTHEG   | Negative |
| P06111 | KKIALFITASLIAGNALAAQ   | Negative |
| P06111 | QTYIRNGNIYTHEGQWAAEV   | Negative |
| P06111 | LAAQTYIRNGNIYTHEGQWA   | Negative |
| P06111 | MKKIALFITASLIAGNALAA   | Negative |
| P06111 | LIAGNALAAQTYIRNGNIYT   | Negative |
| P06111 | AAQTYIRNGNIYTHEGQWAA   | Negative |
| P06111 | IRNGNIYTHEGQWAAEVGAF   | Negative |
| P06111 | ITASLIAGNALAAQTYIRNG   | Negative |
| P06111 | KIALFITASLIAGNALAAQT   | Negative |
| P06111 | LFITASLIAGNALAAQTYIR   | Negative |
| P06111 | FITASLIAGNALAAQTYIRN   | Negative |
| P06111 | YTHEGQWAAEVGAFGSTDLL   | Negative |
| P06205 | EEGEITSKVKFPPSSSPSFP   | Negative |
| P06205 | LEEGEITSKVKFPPSSSPSF   | Negative |

|        |                      |          |
|--------|----------------------|----------|
| P06205 | ITSKVKFPPSSSPSFRLVM  | Negative |
| P06205 | TCGTAVSLCLLLFLTSALEE | Negative |
| P06205 | LFLTSALEEGEITSKVKFPP | Negative |
| P06205 | GPTCGTAVSLCLLLFLTSAL | Negative |
| P06205 | SLCLLLFLTSALEEGEITSK | Negative |
| P06205 | KTFHGPTCGTAVSLCLLLFL | Negative |
| P06205 | TSALEEGEITSKVKFPPSSS | Negative |
| P06205 | LLLFLTSALEEGEITSKVKF | Negative |
| P06205 | CGTAVSLCLLLFLTSALEEG | Negative |
| P06205 | SALEEGEITSKVKFPPSSSP | Negative |
| P06205 | FLTSALEEGEITSKVKFPPS | Negative |
| P06205 | CLLLFLTSALEEGEITSKVK | Negative |
| P06205 | EGEITSKVKFPPSSSPSFPR | Negative |
| P06205 | TFHGPTCGTAVSLCLLLFLT | Negative |
| P06205 | VSLCLLLFLTSALEEGEITS | Negative |
| P06205 | HGPTCGTAVSLCLLLFLTSA | Negative |
| P06205 | TAVSLCLLLFLTSALEEGEI | Negative |
| P06205 | LLFLTSALEEGEITSKVKFP | Negative |
| P06205 | LTSALEEGEITSKVKFPPSS | Negative |
| P06205 | PTCGTAVSLCLLLFLTSALE | Negative |
| P06205 | GEITSKVKFPPSSSPSFRL  | Negative |
| P06205 | MKTFHGPTCGTAVSLCLLLF | Negative |
| P06205 | AVSLCLLLFLTSALEEGEIT | Negative |
| P06205 | ALEEGEITSKVKFPPSSSPS | Negative |
| P06205 | EITSKVKFPPSSSPSFRLV  | Negative |
| P06205 | FHGPTCGTAVSLCLLLFLTS | Negative |
| P06205 | LCLLLFLTSALEEGEITSKV | Negative |
| P06206 | VFLYLLLFLTSALEEGEITS | Negative |
| P06206 | GEITSKVKFPPSSSPSFRL  | Negative |
| P06206 | LFLTSALEEGEITSKVKFPP | Negative |
| P06206 | TFGTAVFLYLLLFLTSALEE | Negative |
| P06206 | ITSKVKFPPSSSPSFRLVM  | Negative |
| P06206 | KTFHGPTFGTAVFLYLLLFL | Negative |
| P06206 | AVFLYLLLFLTSALEEGEIT | Negative |
| P06206 | EGEITSKVKFPPSSSPSFPR | Negative |
| P06206 | FGTAVFLYLLLFLTSALEEG | Negative |
| P06206 | FLTSALEEGEITSKVKFPPS | Negative |
| P06206 | LEEGEITSKVKFPPSSPSF  | Negative |
| P06206 | HGPTFGTAVFLYLLLFLTSA | Negative |
| P06206 | FLYLLLFLTSALEEGEITSK | Negative |
| P06206 | YLLLFLTSALEEGEITSKVK | Negative |
| P06206 | PTFGTAVFLYLLLFLTSALE | Negative |
| P06206 | LLFLTSALEEGEITSKVKFP | Negative |
| P06206 | LYLLLFLTSALEEGEITSKV | Negative |
| P06206 | SALEEGEITSKVKFPPSSSP | Negative |
| P06206 | TSALEEGEITSKVKFPPSSS | Negative |

|        |                      |          |
|--------|----------------------|----------|
| P06206 | TAVFLYLLLFLTSALEEGEI | Negative |
| P06206 | FHGPTFGTAVFLYLLLFLTS | Negative |
| P06206 | LTSALEEGEITSKVKFPPSS | Negative |
| P06206 | MKTFHGPTFGTAVFLYLLLF | Negative |
| P06206 | EITSKVKFPPSSSPSPRLV  | Negative |
| P06206 | EEGEITSKVKFPPSSSPSP  | Negative |
| P06206 | ALEEGEITSKVKFPPSSSPS | Negative |
| P06206 | GPTFGTAVFLYLLLFLTSAL | Negative |
| P06206 | TFHGPTFGTAVFLYLLLFLT | Negative |
| P06206 | LLLFLTSALEEGEITSKVKF | Negative |
| P06215 | LLLVGGSYGEQCGRQAGGAL | Negative |
| P06215 | MMMMIWSVGVVWMLLLVGGS | Negative |
| P06215 | MKKNRMMMMIWSVGVVWMLL | Negative |
| P06215 | MMMIWSVGVVWMLLLVGGSY | Negative |
| P06215 | VWMLLLVGGSYGEQCGRQAG | Negative |
| P06215 | MIWSVGVVWMLLLVGGSYGE | Negative |
| P06215 | WMLLLVGGSYGEQCGRQAGG | Negative |
| P06215 | KKNRMMMMIWSVGVVWMLLL | Negative |
| P06215 | KNRMMMMIWSVGVVWMLLLV | Negative |
| P06215 | RMMMMIWSVGVVWMLLLVGG | Negative |
| P06215 | SVGVVWMLLLVGGSYGEQCG | Negative |
| P06215 | GGSYGEQCGRQAGGALCPGG | Negative |
| P06215 | NRMMMMIWSVGVVWMLLLVG | Negative |
| P06215 | MLLLVGGSYGEQCGRQAGGA | Negative |
| P06215 | VGGSYGEQCGRQAGGALCPG | Negative |
| P06215 | IWSVGVVWMLLLVGGSYGEQ | Negative |
| P06215 | GEQCGRQAGGALCPGGNCCS | Negative |
| P06215 | EQCGRQAGGALCPGGNCCSQ | Negative |
| P06215 | LVGGSYGEQCGRQAGGALCP | Negative |
| P06215 | GVVWMLLLVGGSYGEQCGRQ | Negative |
| P06215 | MMIWSVGVVWMLLLVGGSYG | Negative |
| P06215 | SYGEQCGRQAGGALCPGGNC | Negative |
| P06215 | GSYGEQCGRQAGGALCPGGN | Negative |
| P06215 | YGEQCGRQAGGALCPGGNCC | Negative |
| P06215 | LLVGGSYGEQCGRQAGGALC | Negative |
| P06215 | CGRQAGGALCPGGNCCSQFG | Negative |
| P06215 | QCGRQAGGALCPGGNCCSQF | Negative |
| P06215 | VVWMLLLVGGSYGEQCGRQA | Negative |
| P06215 | WSVGVVWMLLLVGGSYGEQC | Negative |
| P06276 | MLIGKSHTEDDIIATKNGK  | Negative |
| P06276 | FLLCMLIGKSHTEDDIIIA  | Negative |
| P06276 | IICIRFLFWFLLCMLIGKS  | Negative |
| P06276 | VTIICIRFLFWFLLCMLIG  | Negative |
| P06276 | KSHTEDDIIATKNGKVRGM  | Negative |
| P06276 | HTEDDIIATKNGKVRGMNL  | Negative |
| P06276 | MHSKVTHICIRFLFWFLLC  | Negative |

|        |                      |          |
|--------|----------------------|----------|
| P06276 | GKSHTEDDIIIATKNGKVRG | Negative |
| P06276 | RFLFWFLLLCMLIGKSHTE  | Negative |
| P06276 | FLFWFLLLCMLIGKSHTE   | Negative |
| P06276 | EDDIIIATKNGKVRGMNLTV | Negative |
| P06276 | LCMLIGKSHTEDDIIIATKN | Negative |
| P06276 | CMLIGKSHTEDDIIIATKNG | Negative |
| P06276 | WFLLLCMLIGKSHTEDDIII | Negative |
| P06276 | IRFLFWFLLLCMLIGKSHT  | Negative |
| P06276 | LLLCMLIGKSHTEDDIIIAT | Negative |
| P06276 | CIRFLFWFLLLCMLIGKSHT | Negative |
| P06276 | IGKSHTEDDIIIATKNGKVR | Negative |
| P06276 | LIGKSHTEDDIIIATKNGKV | Negative |
| P06276 | SHTEDDIIIATKNGKVRGMN | Negative |
| P06276 | TEDDIIIATKNGKVRGMNLT | Negative |
| P06276 | KVTIICIRFLFWFLLLCMLI | Negative |
| P06276 | LFWFLLLCMLIGKSHTEDDI | Negative |
| P06276 | ICIRFLFWFLLLCMLIGKSH | Negative |
| P06276 | DDIIIATKNGKVRGMNLTVF | Negative |
| P06276 | SKVTIICIRFLFWFLLLCML | Negative |
| P06276 | HSKVTIICIRFLFWFLLCM  | Negative |
| P06276 | TIICIRFLFWFLLLCMLIGK | Negative |
| P06276 | LLCMLIGKSHTEDDIIIATK | Negative |
| P06278 | YARLLTLLFALIFLLPHSAA | Negative |
| P06278 | LLTLLFALIFLLPHSAAAAA | Negative |
| P06278 | LTLFALIFLLPHSAAAAAN  | Negative |
| P06278 | KRLYARLLTLLFALIFLLPH | Negative |
| P06278 | LYARLLTLLFALIFLLPHSA | Negative |
| P06278 | LPHSAAAAANLNGTLMQYFE | Negative |
| P06278 | AAAAANLNGTLMQYFEWYMP | Negative |
| P06278 | AANLNGTLMQYFEWYMPNDG | Negative |
| P06278 | FLLPHSAAAAANLNGTLMQY | Negative |
| P06278 | HSAAAAANLNGTLMQYFEWY | Negative |
| P06278 | KQQKRLYARLLTLLFALIFL | Negative |
| P06278 | MKQQKRLYARLLTLLFALIF | Negative |
| P06278 | RLLTLLFALIFLLPHSAAAA | Negative |
| P06278 | ANLNGTLMQYFEWYMPNDGQ | Negative |
| P06278 | AAAANLNGTLMQYFEWYMPN | Negative |
| P06278 | TLLFALIFLLPHSAAAAANL | Negative |
| P06278 | PHSAAAAANLNGTLMQYFEW | Negative |
| P06278 | IFLLPHSAAAAANLNGTLMQ | Negative |
| P06278 | LLPHSAAAAANLNGTLMQYF | Negative |
| P06278 | ARLLTLLFALIFLLPHSAAA | Negative |
| P06278 | ALIFLLPHSAAAAANLNGTL | Negative |
| P06278 | SAAAAANLNGTLMQYFEWYM | Negative |
| P06278 | AAANLNGTLMQYFEWYMPND | Negative |
| P06278 | LIFLLPHSAAAAANLNGTLM | Negative |

|        |                      |          |
|--------|----------------------|----------|
| P06278 | QQKRLYARLLTLLFALIFLL | Negative |
| P06278 | RLYARLLTLLFALIFLLPHS | Negative |
| P06278 | LLFALIFLLPHSAAAAANLN | Negative |
| P06278 | FALIFLLPHSAAAAANLNGT | Negative |
| P06278 | QKRLYARLLTLLFALIFLLP | Negative |
| P06279 | QPAKAAAPFNGTMMQYFEWY | Negative |
| P06279 | LTfHRIIRKGWMFLLAFLLT | Negative |
| P06279 | RKGWMFLLAFLLTALLFCPT | Negative |
| P06279 | IIRKGWMFLLAFLLTALLFC | Negative |
| P06279 | LLTALLFCPTGQPAKAAAPF | Negative |
| P06279 | GQPAKAAAPFNGTMMQYFEW | Negative |
| P06279 | LLAFLLTALLFCPTGQPAKA | Negative |
| P06279 | WMFLLAFLLTALLFCPTGQP | Negative |
| P06279 | TFHRIIRKGWMFLLAFLLT  | Negative |
| P06279 | FCPTGQPAKAAAPFNGTMMQ | Negative |
| P06279 | TGQPAKAAAPFNGTMMQYFE | Negative |
| P06279 | FLLAFLLTALLFCPTGQPAK | Negative |
| P06279 | IRKGWMFLLAFLLTALLFCP | Negative |
| P06279 | LFCPTGQPAKAAAPFNGTMM | Negative |
| P06279 | PTGQPAKAAAPFNGTMMQYF | Negative |
| P06279 | ALLFCPTGQPAKAAAPFNGT | Negative |
| P06279 | LLFCPTGQPAKAAAPFNGTM | Negative |
| P06279 | KGWMFLLAFLLTALLFCPTG | Negative |
| P06279 | RIIRKGWMFLLAFLLTALLF | Negative |
| P06279 | HRIIRKGWMFLLAFLLTALL | Negative |
| P06279 | FLLTALLFCPTGQPAKAAAP | Negative |
| P06279 | FHRIIRKGWMFLLAFLLTAL | Negative |
| P06279 | MFLLAFLLTALLFCPTGQPA | Negative |
| P06279 | AFLLTALLFCPTGQPAKAAA | Negative |
| P06279 | CPTGQPAKAAAPFNGTMMQY | Negative |
| P06279 | MLTFHRIIRKGWMFLLAFL  | Negative |
| P06279 | LAFLLTALLFCPTGQPAKAA | Negative |
| P06279 | GWMFLLAFLLTALLFCPTGQ | Negative |
| P06279 | TALLFCPTGQPAKAAAPFNG | Negative |
| P06281 | LWSPCTFSLPTRTATFERIP | Negative |
| P06281 | ALLLLWSPCTFSLPTRTATF | Negative |
| P06281 | ATFERIPLKKMPSVREILEE | Negative |
| P06281 | ERIPLKKMPSVREILEERG  | Negative |
| P06281 | TFSLPTRTATFERIPLKKMP | Negative |
| P06281 | RRRMPLWALLLLWSPCTFSL | Negative |
| P06281 | DRRRMPLWALLLLWSPCTFS | Negative |
| P06281 | RTATFERIPLKKMPSVREIL | Negative |
| P06281 | SPCTFSLPTRTATFERIPLK | Negative |
| P06281 | LLWSPCTFSLPTRTATFER  | Negative |
| P06281 | WALLLLWSPCTFSLPTRTAT | Negative |
| P06281 | WSPCTFSLPTRTATFERIPL | Negative |

|        |                      |          |
|--------|----------------------|----------|
| P06281 | SLPTRTATFERIPLKKMPSV | Negative |
| P06281 | RMPLWALLLLWSPCTFSLPT | Negative |
| P06281 | PTRTATFERIPLKKMPSVRE | Negative |
| P06281 | RRMPLWALLLLWSPCTFSLP | Negative |
| P06281 | TFERIPLKKMPSVREILEER | Negative |
| P06281 | PCTFSLPTRTATFERIPLKK | Negative |
| P06281 | TATFERIPLKKMPSVREILE | Negative |
| P06281 | FSLPTRTATFERIPLKKMPS | Negative |
| P06281 | LPTRTATFERIPLKKMPSVR | Negative |
| P06281 | TRTATFERIPLKKMPSVREI | Negative |
| P06281 | LLWSPCTFSLPTRTATFERI | Negative |
| P06281 | CTFSLPTRTATFERIPLKKM | Negative |
| P06281 | MPLWALLLLWSPCTFSLPTR | Negative |
| P06281 | LWALLLLWSPCTFSLPTRTA | Negative |
| P06281 | FERIPLKKMPSVREILEERG | Negative |
| P06281 | LLLLWSPCTFSLPTRTATFE | Negative |
| P06281 | MDRRRMPLWALLLLWSPCTF | Negative |
| P06306 | PAPTRAFVNQHLCGSHLVEA | Negative |
| P06306 | TRLLPLLALLSLWIPAPTRA | Negative |
| P06306 | LLSLWIPAPTRAFVNQHLCG | Negative |
| P06306 | QHLCGSHLVEALYLVCGERG | Negative |
| P06306 | APWTRLLPLLALLSLWIPAP | Negative |
| P06306 | AFVNQHLCGSHLVEALYLV  | Negative |
| P06306 | NQHLCGSHLVEALYLVCGER | Negative |
| P06306 | LWIPAPTRAFVNQHLCGSHL | Negative |
| P06306 | HLCGSHLVEALYLVCGERGF | Negative |
| P06306 | FVNQHLCGSHLVEALYLVCG | Negative |
| P06306 | PWTRLLPLLALLSLWIPAPT | Negative |
| P06306 | WTRLLPLLALLSLWIPAPTR | Negative |
| P06306 | RAFVNQHLCGSHLVEALYLV | Negative |
| P06306 | TRAFVNQHLCGSHLVEALYL | Negative |
| P06306 | LSLWIPAPTRAFVNQHLCGS | Negative |
| P06306 | PLLALLSLWIPAPTRAFVNQ | Negative |
| P06306 | LLPLLALLSLWIPAPTRAFV | Negative |
| P06306 | IPAPTRAFVNQHLCGSHLVE | Negative |
| P06306 | APTRAFVNQHLCGSHLVEAL | Negative |
| P06306 | WIPAPTRAFVNQHLCGSHLV | Negative |
| P06306 | LPLLALLSLWIPAPTRAFVN | Negative |
| P06306 | SLWIPAPTRAFVNQHLCGSH | Negative |
| P06306 | ALLSLWIPAPTRAFVNQHLC | Negative |
| P06306 | LALLSLWIPAPTRAFVNQHL | Negative |
| P06306 | MAPWTRLLPLLALLSLWIPA | Negative |
| P06306 | LCGSHLVEALYLVCGERGFF | Negative |
| P06306 | VNQHLCGSHLVEALYLVCGE | Negative |
| P06306 | RLLPLLALLSLWIPAPTRAF | Negative |
| P06306 | PTRAFVNQHLCGSHLVEALY | Negative |

|        |                        |          |
|--------|------------------------|----------|
| P06399 | LSLRVACLILSLASTVWTAD   | Negative |
| P06399 | STVWTADTGTTSEFIEAGGD   | Negative |
| P06399 | TVWTADTGTTSEFIEAGGDI   | Negative |
| P06399 | EAGGDIRGPRIVERQPSQCK   | Negative |
| P06399 | DTGTTSEFIEAGGDIRGPRI   | Negative |
| P06399 | EFIEAGGDIRGPRIVERQPS   | Negative |
| P06399 | LASTVWTADTGTTSEFIEAG   | Negative |
| P06399 | TTSEFIEAGGDIRGPRIVER   | Negative |
| P06399 | LSLASTVWTADTGTTSEFIE   | Negative |
| P06399 | TADTGTTSEFIEAGGDIRGP   | Negative |
| P06399 | VACLILSLASTVWTADTGTT   | Negative |
| P06399 | TGTTSEFIEAGGDIRGPRIV   | Negative |
| P06399 | GTTSEFIEAGGDIRGPRIVE   | Negative |
| P06399 | TSEFIEAGGDIRGPRIVERQ   | Negative |
| P06399 | IEAGGDIRGPRIVERQPSQC   | Negative |
| P06399 | ACLILSLASTVWTADTGTTT   | Negative |
| P06399 | ILSLASTVWTADTGTTSEFI   | Negative |
| P06399 | ASTVWTADTGTTSEFIEAGG   | Negative |
| P06399 | MLSLRVACLILSLASTVWTA   | Negative |
| P06399 | LILSLASTVWTADTGTTSEF   | Negative |
| P06399 | FIEAGGDIRGPRIVERQPSQ   | Negative |
| P06399 | SLASTVWTADTGTTSEFIEA   | Negative |
| P06399 | SLRVACLILSLASTVWTADT   | Negative |
| P06399 | VWTADTGTTSEFIEAGGDIR   | Negative |
| P06399 | WTADTGTTSEFIEAGGDIRG   | Negative |
| P06399 | SEFIEAGGDIRGPRIVERQP   | Negative |
| P06399 | LRVACLILSLASTVWTADTG   | Negative |
| P06399 | ADTGTTSEFIEAGGDIRGPR   | Negative |
| P06399 | CLILSLASTVWTADTGTTSE   | Negative |
| P06597 | AALSSASSLQALPVGNPAP    | Negative |
| P06597 | AEPSLMIDGILWEGFGGDP    | Negative |
| P06597 | MKKLLKSVLVFAALSSASSL   | Negative |
| P06597 | GNPAEPSLMIDGILWEGFGG   | Negative |
| P06597 | LQALPVGNPAPAEPSLMIDGIL | Negative |
| P06597 | ASSLQALPVGNPAPAEPSLMID | Negative |
| P06597 | ALSSASSLQALPVGNPAP     | Negative |
| P06597 | LVFAALSSASSLQALPVGNP   | Negative |
| P06597 | LSSASSLQALPVGNPAP      | Negative |
| P06597 | VFAALSSASSLQALPVGNP    | Negative |
| P06597 | KKLLKSVLVFAALSSASSLQ   | Negative |
| P06597 | SSASSLQALPVGNPAPAEPSLM | Negative |
| P06597 | LPVGNPAPAEPSLMIDGILWEG | Negative |
| P06597 | SVLVFAALSSASSLQALPVG   | Negative |
| P06597 | LKSVLVFAALSSASSLQALP   | Negative |
| P06597 | SSLQALPVGNPAPAEPSLMIDG | Negative |
| P06597 | QALPVGNPAPAEPSLMIDGILW | Negative |



|        |                      |          |
|--------|----------------------|----------|
| P06597 | PVGNPAEPSLMIDGILWEGF | Negative |
| P06597 | PAEPSLMIDGILWEGFGGDP | Negative |
| P06597 | FAALSSASSLQALPVGNPAE | Negative |
| P06597 | LLKSVLVFAALSSASSLQAL | Negative |
| P06597 | VGNPAEPSLMIDGILWEGFG | Negative |
| P06597 | KSVLVFAALSSASSLQALPV | Negative |
| P06597 | KLLKSVLVFAALSSASSLQA | Negative |
| P06597 | SASSLQALPVGNPAEPSLMI | Negative |
| P06597 | SLQALPVGNPAEPSLMIDGI | Negative |
| P06597 | EPSLMIDGILWEGFGGDPCD | Negative |
| P06597 | ALPVGNPAEPSLMIDGILWE | Negative |
| P06597 | NPAEPSLMIDGILWEGFGGD | Negative |
| P06654 | RKSAFGLASVSAAFLVGSTV | Negative |
| P06654 | AFLVGSTVFAVDSPIEDTPI | Negative |
| P06654 | STVFAVDSPIEDTPIIRNGG | Negative |
| P06654 | VGSTVFAVDSPIEDTPIIRN | Negative |
| P06654 | GSTVFAVDSPIEDTPIIRNG | Negative |
| P06654 | KYFLRKSAFGLASVSAAFLV | Negative |
| P06654 | KEKKVKYFLRKSAFGLASVS | Negative |
| P06654 | MEKEKKVKYFLRKSAFGLAS | Negative |
| P06654 | VKYFLRKSAFGLASVSAAFL | Negative |
| P06654 | LASVSAAFLVGSTVFAVDSP | Negative |
| P06654 | FLVGSTVFAVDSPIEDTPII | Negative |
| P06654 | FGLASVSAAFLVGSTVFAVD | Negative |
| P06654 | AFGLASVSAAFLVGSTVFAV | Negative |
| P06654 | VSAAFLVGSTVFAVDSPIED | Negative |
| P06654 | KSAFGLASVSAAFLVGSTVF | Negative |
| P06654 | EKKVKYFLRKSAFGLASVSA | Negative |
| P06654 | FLRKSAFGLASVSAAFLVGS | Negative |
| P06654 | AAFLVGSTVFAVDSPIEDTP | Negative |
| P06654 | EKEKKVKYFLRKSAFGLASV | Negative |
| P06654 | GLASVSAAFLVGSTVFAVDS | Negative |
| P06654 | KVKYFLRKSAFGLASVSAAF | Negative |
| P06654 | YFLRKSAFGLASVSAAFLVG | Negative |
| P06654 | LRKSAFGLASVSAAFLVGST | Negative |
| P06654 | LVGSTVFAVDSPIEDTPIIR | Negative |
| P06654 | SVSAAFLVGSTVFAVDSPIE | Negative |
| P06654 | SAFGLASVSAAFLVGSTVFA | Negative |
| P06654 | TVFAVDSPIEDTPIIRNGGE | Negative |
| P06654 | KKVKYFLRKSAFGLASVSAA | Negative |
| P06654 | SAAFLVGSTVFAVDSPIEDT | Negative |
| P06681 | MGPLMVLFCLLFLYPGLADS | Negative |
| P06681 | FCLLFLYPGLADSAPSCPQN | Negative |
| P06681 | PGLADSAPSCPQNVNISGGT | Negative |
| P06681 | LFLYPGLADSAPSCPQNVNI | Negative |
| P06681 | GPLMVLFCLLFLYPGLADSA | Negative |

|        |                      |          |
|--------|----------------------|----------|
| P06681 | NVNISGGTFTLSHGWAPGSL | Negative |
| P06681 | LADSAPSCPQNVNISGGTFT | Negative |
| P06681 | PLMVLFCLLFLYPGLADSAP | Negative |
| P06681 | LYPGLADSAPSCPQNVNISG | Negative |
| P06681 | PQNVNISGGTFTLSHGWAPG | Negative |
| P06681 | YPGLADSAPSCPQNVNISGG | Negative |
| P06681 | VNISGGTFTLSHGWAPGSL  | Negative |
| P06681 | LFCLLFLYPGLADSAPSCPQ | Negative |
| P06681 | CPQNVNISGGTFTLSHGWAP | Negative |
| P06681 | LMVLFCLLFLYPGLADSAPS | Negative |
| P06681 | GLADSAPSCPQNVNISGGTF | Negative |
| P06681 | LLFLYPGLADSAPSCPQNVN | Negative |
| P06681 | QNVNISGGTFTLSHGWAPGS | Negative |
| P06681 | NISGGTFTLSHGWAPGSLLT | Negative |
| P06681 | ADSAPSCPQNVNISGGTFTL | Negative |
| P06681 | APSCPQNVNISGGTFTLSHG | Negative |
| P06681 | MVLFCLLFLYPGLADSAPSC | Negative |
| P06681 | DSAPSCPQNVNISGGTFTLS | Negative |
| P06681 | CLLFLYPGLADSAPSCPQNV | Negative |
| P06681 | ISGGTFTLSHGWAPGSLLTY | Negative |
| P06681 | PSCPQNVNISGGTFTLSHG  | Negative |
| P06681 | SCPQNVNISGGTFTLSHGWA | Negative |
| P06681 | SAPSCPQNVNISGGTFTLSH | Negative |
| P06681 | FLYPGLADSAPSCPQNVNIS | Negative |
| P06727 | AVVLTLALVAVAGARAEVSA | Negative |
| P06727 | ADQVATVMWDYFSQLSNNAK | Negative |
| P06727 | MFLKAVVLTLALVAVAGARA | Negative |
| P06727 | FLKAVVLTLALVAVAGARAE | Negative |
| P06727 | VSADQVATVMWDYFSQLSNN | Negative |
| P06727 | RAEVSADQVATVMWDYFSQL | Negative |
| P06727 | ARAEVSADQVATVMWDYFSQ | Negative |
| P06727 | LVAVAGARAEVSADQVATVM | Negative |
| P06727 | ATVMWDYFSQLSNNAKEAVE | Negative |
| P06727 | VLTLALVAVAGARAEVSADQ | Negative |
| P06727 | AGARAEVSADQVATVMWDYF | Negative |
| P06727 | VMWDYFSQLSNNAKEAVEHL | Negative |
| P06727 | SADQVATVMWDYFSQLSNN  | Negative |
| P06727 | GARAEVSADQVATVMWDYFS | Negative |
| P06727 | LTLALVAVAGARAEVSADQV | Negative |
| P06727 | LALVAVAGARAEVSADQVAT | Negative |
| P06727 | AVAGARAEVSADQVATVMWD | Negative |
| P06727 | VATVMWDYFSQLSNNAKEAV | Negative |
| P06727 | VAVAGARAEVSADQVATVMW | Negative |
| P06727 | ALVAVAGARAEVSADQVATV | Negative |
| P06727 | DQVATVMWDYFSQLSNNAKE | Negative |
| P06727 | QVATVMWDYFSQLSNNAKEA | Negative |

|        |                      |          |
|--------|----------------------|----------|
| P06727 | LKAVVLTALVAVAGARAEV  | Negative |
| P06727 | AEVSADQVATVMWDYFSQLS | Negative |
| P06727 | VAGARAEVSADQVATVMWDY | Negative |
| P06727 | EVSADQVATVMWDYFSQLSN | Negative |
| P06727 | KAVVLTALVAVAGARAEVS  | Negative |
| P06727 | TLALVAVAGARAEVSADQVA | Negative |
| P06727 | TVMWDYFSQLSNNAKEAVEH | Negative |
| P06797 | ATPKFDQTFSAEWHQWKSTH | Negative |
| P06797 | CLGTALATPKFDQTFSAEWH | Negative |
| P06797 | PKFDQTFSAEWHQWKSTHRR | Negative |
| P06797 | LLLAVLCLGTALATPKFDQ  | Negative |
| P06797 | FDQTFSAEWHQWKSTHRRLY | Negative |
| P06797 | DQTFSAEWHQWKSTHRRLYG | Negative |
| P06797 | LGTALATPKFDQTFSAEWHQ | Negative |
| P06797 | LLAVLCLGTALATPKFDQTF | Negative |
| P06797 | LATPKFDQTFSAEWHQWKST | Negative |
| P06797 | TFSAEWHQWKSTHRRLYGTN | Negative |
| P06797 | LCLGTALATPKFDQTFSAEW | Negative |
| P06797 | SAEWHQWKSTHRRLYGTNEE | Negative |
| P06797 | WHQWKSTHRRLYGTNEEEWR | Negative |
| P06797 | EWQWKSTHRRLYGTNEEEW  | Negative |
| P06797 | LLAVLCLGTALATPKFDQT  | Negative |
| P06797 | KFDQTFSAEWHQWKSTHRRL | Negative |
| P06797 | NLLLLAVLCLGTALATPKF  | Negative |
| P06797 | HQWKSTHRRLYGTNEEEWRR | Negative |
| P06797 | ALATPKFDQTFSAEWHQWKS | Negative |
| P06797 | MNLLLLAVLCLGTALATPK  | Negative |
| P06797 | LAVLCLGTALATPKFDQTFS | Negative |
| P06797 | AEWHQWKSTHRRLYGTNEEE | Negative |
| P06797 | TALATPKFDQTFSAEWHQWK | Negative |
| P06797 | TPKFDQTFSAEWHQWKSTHR | Negative |
| P06797 | VLCLGTALATPKFDQTFSAE | Negative |
| P06797 | GTALATPKFDQTFSAEWHQW | Negative |
| P06797 | AVLCLGTALATPKFDQTFS  | Negative |
| P06797 | FSAEWHQWKSTHRRLYGTNE | Negative |
| P06797 | QTFSAEWHQWKSTHRRLYGT | Negative |
| P06857 | VCYEQIGCFSDAEPWAGTAI | Negative |
| P06857 | IWTIALFLLGAAKAKEVCYE | Negative |
| P06857 | FLLGAAKAKEVCYEQIGCFS | Negative |
| P06857 | FSDAEPWAGTAIRPLKVLPW | Negative |
| P06857 | CYEQIGCFSDAEPWAGTAIR | Negative |
| P06857 | EQIGCFSDAEPWAGTAIRPL | Negative |
| P06857 | AKEVCYEQIGCFSDAEPWAG | Negative |
| P06857 | KEVCYEQIGCFSDAEPWAGT | Negative |
| P06857 | QIGCFSDAEPWAGTAIRPLK | Negative |
| P06857 | TIALFLLGAAKAKEVCYEQI | Negative |

|        |                      |          |
|--------|----------------------|----------|
| P06857 | LLGAAKAKEVCYEQIGCFSD | Negative |
| P06857 | ALFLLGAAKAKEVCYEQIGC | Negative |
| P06857 | LFLLGAAKAKEVCYEQIGCF | Negative |
| P06857 | GCFSDAEPWAGTAIRPLKVL | Negative |
| P06857 | AAKAKEVCYEQIGCFSDAEP | Negative |
| P06857 | YEQIGCFSDAEPWAGTAIRP | Negative |
| P06857 | KAKEVCYEQIGCFSDAEPWA | Negative |
| P06857 | SDAEPWAGTAIRPLKVLPWS | Negative |
| P06857 | WTIALFLLGAAKAKEVCYEQ | Negative |
| P06857 | IGCFSDAEPWAGTAIRPLKV | Negative |
| P06857 | CFSDAEPWAGTAIRPLKVLP | Negative |
| P06857 | VSIWTIALFLLGAAKAKEVC | Negative |
| P06857 | AKAKEVCYEQIGCFSDAEPW | Negative |
| P06857 | EVCYEQIGCFSDAEPWAGTA | Negative |
| P06857 | DAEPWAGTAIRPLKVLPWSP | Negative |
| P06857 | GAAKAKEVCYEQIGCFSDAE | Negative |
| P06857 | LGAAKAKEVCYEQIGCFSDA | Negative |
| P06857 | MVSIWTIALFLLGAAKAKEV | Negative |
| P06857 | IALFLLGAAKAKEVCYEQIG | Negative |
| P06858 | AAADQRRDFIDIESKFALRT | Negative |
| P06858 | VLTLAVWLQSLTASRGGVAA | Negative |
| P06858 | SKALLVLTLAVWLQSLTASR | Negative |
| P06858 | GGVAAADQRRDFIDIESKFA | Negative |
| P06858 | LVLTLAVWLQSLTASRGGVA | Negative |
| P06858 | VAAADQRRDFIDIESKFALR | Negative |
| P06858 | LLVLTLAVWLQSLTASRGGV | Negative |
| P06858 | DQRRDFIDIESKFALRTPED | Negative |
| P06858 | ADQRRDFIDIESKFALRTP  | Negative |
| P06858 | QSLTASRGGVAAADQRRDFI | Negative |
| P06858 | SLTASRGGVAAADQRRDFID | Negative |
| P06858 | SRGGVAAADQRRDFIDIESK | Negative |
| P06858 | LTLAVWLQSLTASRGGVAAA | Negative |
| P06858 | LAVWLQSLTASRGGVAAADQ | Negative |
| P06858 | GVAAADQRRDFIDIESKFAL | Negative |
| P06858 | ASRGGVAAADQRRDFIDIES | Negative |
| P06858 | TLAVWLQSLTASRGGVAAAD | Negative |
| P06858 | LQSLTASRGGVAAADQRRDF | Negative |
| P06858 | KALLVLTLAVWLQSLTASRG | Negative |
| P06858 | MESKALLVLTLAVWLQSLTA | Negative |
| P06858 | TASRGGVAAADQRRDFIDIE | Negative |
| P06858 | ALLVLTLAVWLQSLTASRGG | Negative |
| P06858 | AADQRRDFIDIESKFALRTP | Negative |
| P06858 | QRRDFIDIESKFALRTPEDT | Negative |
| P06858 | LTASRGGVAAADQRRDFIDI | Negative |
| P06858 | RGGVAAADQRRDFIDIESKF | Negative |
| P06858 | ESKALLVLTLAVWLQSLTAS | Negative |

|        |                      |          |
|--------|----------------------|----------|
| P06858 | AVWLQSLTASRGGVAAADQR | Negative |
| P06858 | WLQSLTASRGGVAAADQRRD | Negative |
| P06859 | GVDGGLWQFENMIIKVVKKS | Negative |
| P06859 | VGVDGGLWQFENMIIKVVKK | Negative |
| P06859 | LLVGVDGGLWQFENMIIKV  | Negative |
| P06859 | WQFENMIIKVVKKSGILSYS | Negative |
| P06859 | MIIKVVKKSGILSYSAYGCY | Negative |
| P06859 | FENMIIKVVKKSGILSYSAY | Negative |
| P06859 | QFENMIIKVVKKSGILSYS  | Negative |
| P06859 | IIKVVKKSGILSYSAYGCYC | Negative |
| P06859 | LWIMAVLLVGVDGGLWQFEN | Negative |
| P06859 | VLLVGVDGGLWQFENMIIKV | Negative |
| P06859 | LVGVDGGLWQFENMIIKVVK | Negative |
| P06859 | AVLLVGVDGGLWQFENMIIK | Negative |
| P06859 | NMIIKVVKKSGILSYSAYGC | Negative |
| P06859 | WIMAVLLVGVDGGLWQFENM | Negative |
| P06859 | LWQFENMIIKVVKKSGILSY | Negative |
| P06859 | MAVLLVGVDGGLWQFENMII | Negative |
| P06859 | VVKKSGILSYSAYGCYCGWG | Negative |
| P06859 | KVVKKSGILSYSAYGCYCGW | Negative |
| P06859 | GLWQFENMIIKVVKKSGILS | Negative |
| P06859 | MRTLWIMAVLLVGVDGGLWQ | Negative |
| P06859 | ENMIIKVVKKSGILSYSAYG | Negative |
| P06859 | TLWIMAVLLVGVDGGLWQFE | Negative |
| P06859 | IMAVLLVGVDGGLWQFENMI | Negative |
| P06859 | DGGLWQFENMIIKVVKKSGI | Negative |
| P06859 | GGLWQFENMIIKVVKKSGIL | Negative |
| P06859 | VDGGLWQFENMIIKVVKKSG | Negative |
| P06859 | KKSGILSYSAYGCYCGWGGR | Negative |
| P06859 | VKKSGILSYSAYGCYCGWGG | Negative |
| P06859 | IKVVKKSGILSYSAYGCYCG | Negative |
| P06865 | TSSRLWFSLLLAAAFAGRAT | Negative |
| P06865 | LWPWPQNFQTSDQRYVLYPN | Negative |
| P06865 | ATALWPWPQNFQTSDQRYVL | Negative |
| P06865 | AAAFAGRATALWPWPQNFQT | Negative |
| P06865 | SRLWFSLLLAAAFAGRATAL | Negative |
| P06865 | WPWPQNFQTSDQRYVLYPNN | Negative |
| P06865 | NFQTSDQRYVLYPNNFQFQY | Negative |
| P06865 | WPQNFQTSDQRYVLYPNNFQ | Negative |
| P06865 | MTSSRLWFSLLLAAAFAGRA | Negative |
| P06865 | QNFQTSDQRYVLYPNNFQFQ | Negative |
| P06865 | TALWPWPQNFQTSDQRYVLY | Negative |
| P06865 | LWFSLLLAAAFAGRATALWP | Negative |
| P06865 | ALWPWPQNFQTSDQRYVLYP | Negative |
| P06865 | RLWFSLLLAAAFAGRATALW | Negative |
| P06865 | WFSLLLAAAFAGRATALWPW | Negative |

|        |                       |          |
|--------|-----------------------|----------|
| P06865 | GRATALWPWPQNFQTSQDQRY | Negative |
| P06865 | PWPQNFQTSQDQRYVLYPNNF | Negative |
| P06865 | FQTSQDQRYVLYPNNFQFQYD | Negative |
| P06865 | FAGRATALWPWPQNFQTSQDQ | Negative |
| P06865 | SSRLWFSLLLAAAFAGRATA  | Negative |
| P06865 | AAFAGRATALWPWPQNFQTS  | Negative |
| P06865 | LAAAFAGRATALWPWPQNFQ  | Negative |
| P06865 | SLLLAAAFAGRATALWPWPQ  | Negative |
| P06865 | LLAAAFAGRATALWPWPQNF  | Negative |
| P06865 | RATALWPWPQNFQTSQDQRYV | Negative |
| P06865 | AGRATALWPWPQNFQTSQDQR | Negative |
| P06865 | LLLAAAFAGRATALWPWPQN  | Negative |
| P06865 | PQNFQTSQDQRYVLYPNNFQF | Negative |
| P06865 | AFAGRATALWPWPQNFQTS   | Negative |
| P06867 | SLDDYVNTQGAFLFSLSRKQ  | Negative |
| P06867 | GLGDSLDDYVNTQGAFLFSL  | Negative |
| P06867 | GDSLDDYVNTQGAFLFSLSR  | Negative |
| P06867 | VVLLLLFLKSGLGDSLDDY   | Negative |
| P06867 | LLLFLKSGLGDSLDDYVNT   | Negative |
| P06867 | SGLGDSLDDYVNTQGAFLFS  | Negative |
| P06867 | LKSGLGDSLDDYVNTQGAFL  | Negative |
| P06867 | QGAFLFSLSRKQVAARSVEE  | Negative |
| P06867 | LDDYVNTQGAFLFSLSRKQV  | Negative |
| P06867 | DDYVNTQGAFLFSLSRKQVA  | Negative |
| P06867 | HKEVVLLLLLFLKSGLGDSL  | Negative |
| P06867 | DYVNTQGAFLFSLSRKQVAA  | Negative |
| P06867 | DSLDDYVNTQGAFLFSLSRK  | Negative |
| P06867 | FLKSGLGDSLDDYVNTQGAF  | Negative |
| P06867 | LGDSLDDYVNTQGAFLFSLS  | Negative |
| P06867 | GAFSLFSLSRKQVAARSVEEC | Negative |
| P06867 | KEVVLLLLLFLKSGLGDSL   | Negative |
| P06867 | YVNTQGAFLFSLSRKQVAAR  | Negative |
| P06867 | TQGAFLFSLSRKQVAARSVE  | Negative |
| P06867 | KSGLGDSLDDYVNTQGAFLF  | Negative |
| P06867 | LLFLKSGLGDSLDDYVNTQG  | Negative |
| P06867 | VNTQGAFLFSLSRKQVAARS  | Negative |
| P06867 | MDHKEVVLLLLLFLKSGLG   | Negative |
| P06867 | LLLLLFLKSGLGDSLDDYVN  | Negative |
| P06867 | VLLLLLFLKSGLGDSLDDYV  | Negative |
| P06867 | DHKEVVLLLLLFLKSGLGDS  | Negative |
| P06867 | LLLFLKSGLGDSLDDYVNTQ  | Negative |
| P06867 | NTQGAFLFSLSRKQVAARSV  | Negative |
| P06867 | LFLKSGLGDSLDDYVNTQGA  | Negative |
| P06868 | VVFLLLLFLKSGLGDLDDY   | Negative |
| P06868 | LPASPKMEHKAVVFLLLLFL  | Negative |
| P06868 | KAVVFLLLLFLKSGLGDLDD  | Negative |

|        |                      |          |
|--------|----------------------|----------|
| P06868 | FLLLLFLKSGLDLLDDYVN  | Negative |
| P06868 | PKMEHKAVVFLLLLFLKSGL | Negative |
| P06868 | LGDLLDDYVNTQGASLLSLS | Negative |
| P06868 | LLLFLKSGLDLLDDYVNTQ  | Negative |
| P06868 | LKSGLDLLDDYVNTQGASL  | Negative |
| P06868 | FLKSGLDLLDDYVNTQGAS  | Negative |
| P06868 | LLDDYVNTQGASLLSLSRKN | Negative |
| P06868 | ASPKMEHKAVVFLLLLFLKS | Negative |
| P06868 | GDLLDDYVNTQGASLLSLSR | Negative |
| P06868 | DDYVNTQGASLLSLSRKNLA | Negative |
| P06868 | PASPKMEHKAVVFLLLLFLK | Negative |
| P06868 | LLFLKSGLDLLDDYVNTQG  | Negative |
| P06868 | LFLKSGLDLLDDYVNTQGA  | Negative |
| P06868 | KSGLDLLDDYVNTQGASLL  | Negative |
| P06868 | LDDYVNTQGASLLSLSRKNL | Negative |
| P06868 | MEHKAVVFLLLLFLKSGLD  | Negative |
| P06868 | VFLLLLFLKSGLDLLDDYV  | Negative |
| P06868 | MLPASPKMEHKAVVFLLLLF | Negative |
| P06868 | HKAVVFLLLLFLKSGLDLL  | Negative |
| P06868 | EHKAVVFLLLLFLKSGLDL  | Negative |
| P06868 | DLLDDYVNTQGASLLSLSRK | Negative |
| P06868 | SPKMEHKAVVFLLLLFLKSG | Negative |
| P06868 | GLGDLLDDYVNTQGASLLSL | Negative |
| P06868 | LLLLFLKSGLDLLDDYVNT  | Negative |
| P06868 | SGLGDLLDDYVNTQGASLLS | Negative |
| P06868 | KMEHKAVVFLLLLFLKSGLG | Negative |
| P06875 | QSSSEIKIVRDEYGMPIYA  | Negative |
| P06875 | MIVNCVTASLMYYWSLPALA | Negative |
| P06875 | ASLMYYWSLPALAEQSSSEI | Negative |
| P06875 | WSLPALAEQSSSEIKIVRDE | Negative |
| P06875 | YYWSLPALAEQSSSEIKIVR | Negative |
| P06875 | RNRMIVNCVTASLMYYWSLP | Negative |
| P06875 | SSSEIKIVRDEYGMPIYAN  | Negative |
| P06875 | LPALAEQSSSEIKIVRDEYG | Negative |
| P06875 | MYYWSLPALAEQSSSEIKIV | Negative |
| P06875 | KNRNRMIVNCVTASLMYYWS | Negative |
| P06875 | CVTASLMYYWSLPALAEQSS | Negative |
| P06875 | IVNCVTASLMYYWSLPALAE | Negative |
| P06875 | TASLMYYWSLPALAEQSSSE | Negative |
| P06875 | LMYYWSLPALAEQSSSEIKI | Negative |
| P06875 | NCVTASLMYYWSLPALAEQS | Negative |
| P06875 | MKNRNRMIVNCVTASLMYYW | Negative |
| P06875 | SLMYYWSLPALAEQSSSEIK | Negative |
| P06875 | VNCVTASLMYYWSLPALAEQ | Negative |
| P06875 | ALAEQSSSEIKIVRDEYGMP | Negative |
| P06875 | NRMIVNCVTASLMYYWSLPA | Negative |

|        |                      |          |
|--------|----------------------|----------|
| P06875 | RMIVNCVTASLMYYWSLPAL | Negative |
| P06875 | SLPALAEQSSSEIKIVRDEY | Negative |
| P06875 | SSEIKIVRDEYGMPHIYAND | Negative |
| P06875 | AEQSSSEIKIVRDEYGMPHI | Negative |
| P06875 | LAEQSSSEIKIVRDEYGMPH | Negative |
| P06875 | EQSSSEIKIVRDEYGMPHIY | Negative |
| P06875 | YWSLPALAEQSSSEIKIVRD | Negative |
| P06875 | NRNRMIVNCVTASLMYYWSL | Negative |
| P06875 | PALAEQSSSEIKIVRDEYGM | Negative |
| P06908 | IENNTKDVCVGNPGIPGTPG | Negative |
| P06908 | ENNTKDVCVGNPGIPGTPGS | Negative |
| P06908 | ALALTLLMVSGIENNTKDVC | Negative |
| P06908 | VCVGNPGIPGTPGSHGLPGR | Negative |
| P06908 | NPGIPGTPGSHGLPGRDGRD | Negative |
| P06908 | LLMVSGIENNTKDVCVGNPG | Negative |
| P06908 | PGIPGTPGSHGLPGRDGRDG | Negative |
| P06908 | WLRCLALALTLLMVSGIENN | Negative |
| P06908 | RCLALALTLLMVSGIENNTK | Negative |
| P06908 | CLALALTLLMVSGIENNTKD | Negative |
| P06908 | GNPGIPGTPGSHGLPGRDGR | Negative |
| P06908 | VGNPGIPGTPGSHGLPGRDG | Negative |
| P06908 | KDVCVGNPGIPGTPGSHGLP | Negative |
| P06908 | MVSGIENNTKDVCVGNPGIP | Negative |
| P06908 | NTKDVCVGNPGIPGTPGSHG | Negative |
| P06908 | LTLLMVSGIENNTKDVCVGN | Negative |
| P06908 | LALTLLMVSGIENNTKDVCV | Negative |
| P06908 | TKDVCVGNPGIPGTPGSHGL | Negative |
| P06908 | NNTKDVCVGNPGIPGTPGSH | Negative |
| P06908 | LMVSGIENNTKDVCVGNPGI | Negative |
| P06908 | GIENNTKDVCVGNPGIPGTP | Negative |
| P06908 | CVGNPGIPGTPGSHGLPGRD | Negative |
| P06908 | ALTLLMVSGIENNTKDVCVG | Negative |
| P06908 | LALALTLLMVSGIENNTKDV | Negative |
| P06908 | SGIENNTKDVCVGNPGIPGT | Negative |
| P06908 | DVCVGNPGIPGTPGSHGLPG | Negative |
| P06908 | MWLRCLALALTLLMVSGIEN | Negative |
| P06908 | VSGIENNTKDVCVGNPGIPG | Negative |
| P06908 | TLLMVSGIENNTKDVCVGNP | Negative |
| P06911 | VGLAAGTEGAVVKDFDISKF | Negative |
| P06911 | TEGAVVKDFDISKFLGFWYE | Negative |
| P06911 | LLGLCVGLAAGTEGAVVKDF | Negative |
| P06911 | ISKFLGFWYEIAFASKMGTP | Negative |
| P06911 | DISKFLGFWYEIAFASKMGT | Negative |
| P06911 | PFALLGLCVGLAAGTEGAVV | Negative |
| P06911 | EGAVVKDFDISKFLGFWYEI | Negative |
| P06911 | NIMPFALLGLCVGLAAGTEG | Negative |



|        |                      |          |
|--------|----------------------|----------|
| P06911 | AGTEGAVVKDFDISKFLGFW | Negative |
| P06911 | KDFDISKFLGFWYEIAFASK | Negative |
| P06911 | CVGLAAGTEGAVVKDFDISK | Negative |
| P06911 | DFDISKFLGFWYEIAFASKM | Negative |
| P06911 | ENIMPFALLGLCVGLAAGTE | Negative |
| P06911 | AAGTEGAVVKDFDISKFLGF | Negative |
| P06911 | GLCVGLAAGTEGAVVKDFDI | Negative |
| P06911 | AVVKDFDISKFLGFWYEIAF | Negative |
| P06911 | VVKDFDISKFLGFWYEIAFA | Negative |
| P06911 | MENIMPFALLGLCVGLAAGT | Negative |
| P06911 | GAVVKDFDISKFLGFWYEIA | Negative |
| P06911 | LCVGLAAGTEGAVVKDFDIS | Negative |
| P06911 | FALLGLCVGLAAGTEGAVVK | Negative |
| P06911 | VKDFDISKFLGFWYEIAFAS | Negative |
| P06911 | LAAGTEGAVVKDFDISKFLG | Negative |
| P06911 | FDISKFLGFWYEIAFASKMG | Negative |
| P06911 | IMPFALLGLCVGLAAGTEGA | Negative |
| P06911 | GTEGAVVKDFDISKFLGFWY | Negative |
| P06911 | ALLGLCVGLAAGTEGAVVKD | Negative |
| P06911 | LGLCVGLAAGTEGAVVKDFD | Negative |
| P06911 | GLAAGTEGAVVKDFDISKFL | Negative |
| P06912 | SSFRVKENFDKARFAGTWYA | Negative |
| P06912 | ALVLLAALGSGRGERDCRVS | Negative |
| P06912 | DCRVSSFRVKENFDKARFAG | Negative |
| P06912 | WVWALVLLAALGSGRGERDC | Negative |
| P06912 | RGERDCRVSSFRVKENFDKA | Negative |
| P06912 | CRVSSFRVKENFDKARFAGT | Negative |
| P06912 | WALVLLAALGSGRGERDCRV | Negative |
| P06912 | LAALGSGRGERDCRVSSFRV | Negative |
| P06912 | LGSGRGERDCRVSSFRVKEN | Negative |
| P06912 | LVLLAALGSGRGERDCRVSS | Negative |
| P06912 | RDCRVSSFRVKENFDKARFA | Negative |
| P06912 | KENFDKARFAGTWYAMAKKD | Negative |
| P06912 | VKENFDKARFAGTWYAMAKK | Negative |
| P06912 | MEWVWALVLLAALGSGRGER | Negative |
| P06912 | SFRVKENFDKARFAGTWYAM | Negative |
| P06912 | AALGSGRGERDCRVSSFRVK | Negative |
| P06912 | VLLAALGSGRGERDCRVSSF | Negative |
| P06912 | LLAALGSGRGERDCRVSSFR | Negative |
| P06912 | FRVKENFDKARFAGTWYAMA | Negative |
| P06912 | GERDCRVSSFRVKENFDKAR | Negative |
| P06912 | SGRGERDCRVSSFRVKENFD | Negative |
| P06912 | RVKENFDKARFAGTWYAMAK | Negative |
| P06912 | ERDCRVSSFRVKENFDKARF | Negative |
| P06912 | RVSSFRVKENFDKARFAGTW | Negative |
| P06912 | VSSFRVKENFDKARFAGTWY | Negative |

|        |                      |          |
|--------|----------------------|----------|
| P06912 | ALGSGRGERDCRVSSFRVKE | Negative |
| P06912 | GRGERDCRVSSFRVKENFDK | Negative |
| P06912 | GSGRGERDCRVSSFRVKENF | Negative |
| P06912 | EWVWALVLLAALGSGRGERD | Negative |
| P07024 | FTLASETALAYEQDKTYKIT | Negative |
| P07024 | QRGVALALLTTFTLASETAL | Negative |
| P07024 | QDKTYKITVLHTNDHHGHFW | Negative |
| P07024 | ETALAYEQDKTYKITVLHTN | Negative |
| P07024 | LLQRGVALALLTTFTLASET | Negative |
| P07024 | KLLQRGVALALLTTFTLASE | Negative |
| P07024 | ALALLTTFTLASETALAYEQ | Negative |
| P07024 | EQDKTYKITVLHTNDHHGHF | Negative |
| P07024 | YEQDKTYKITVLHTNDHHGH | Negative |
| P07024 | KTYKITVLHTNDHHGHFWRN | Negative |
| P07024 | LASETALAYEQDKTYKITVL | Negative |
| P07024 | RGVALALLTTFTLASETALA | Negative |
| P07024 | TALAYEQDKTYKITVLHTND | Negative |
| P07024 | AYEQDKTYKITVLHTNDHHG | Negative |
| P07024 | DKTYKITVLHTNDHHGHFWR | Negative |
| P07024 | ALAYEQDKTYKITVLHTNDH | Negative |
| P07024 | MKLLQRGVALALLTTFTLAS | Negative |
| P07024 | SETALAYEQDKTYKITVLHT | Negative |
| P07024 | LAYEQDKTYKITVLHTNDHH | Negative |
| P07024 | LLTTFTLASETALAYEQDKT | Negative |
| P07024 | GVALALLTTFTLASETALAY | Negative |
| P07024 | TFTLASETALAYEQDKTYKI | Negative |
| P07024 | TTFTLASETALAYEQDKTYK | Negative |
| P07024 | ASETALAYEQDKTYKITVLH | Negative |
| P07024 | VALALLTTFTLASETALAYE | Negative |
| P07024 | LTTFTLASETALAYEQDKTY | Negative |
| P07024 | LQRGVALALLTTFTLASETA | Negative |
| P07024 | LALLTTFTLASETALAYEQD | Negative |
| P07024 | TLASETALAYEQDKTYKITV | Negative |
| P07093 | EELGSNTGIQVFNQIVKSRP | Negative |
| P07093 | VTLPSICSHFNPLSLEELGS | Negative |
| P07093 | NPLSLEELGSNTGIQVFNQI | Negative |
| P07093 | LLASVTLPSCSHFNPLSLE  | Negative |
| P07093 | FNPLSLEELGSNTGIQVFNQ | Negative |
| P07093 | SHFNPLSLEELGSNTGIQVF | Negative |
| P07093 | ELGSNTGIQVFNQIVKSRPH | Negative |
| P07093 | CSHFNPLSLEELGSNTGIQV | Negative |
| P07093 | HLPLFLLASVTLPSCSHFN  | Negative |
| P07093 | LGSNTGIQVFNQIVKSRPHD | Negative |
| P07093 | SICSHFNPLSLEELGSNTGI | Negative |
| P07093 | HFNPLSLEELGSNTGIQVFN | Negative |
| P07093 | PLSLEELGSNTGIQVFNQIV | Negative |

|        |                      |          |
|--------|----------------------|----------|
| P07093 | TLPSICSHFNPLSLEELGSN | Negative |
| P07093 | LSLEELGSNTGIQVFNQIVK | Negative |
| P07093 | LFLLASVTLPISCSHFNPLS | Negative |
| P07093 | ICSHFNPLSLEELGSNTGIQ | Negative |
| P07093 | LEELGSNTGIQVFNQIVKSR | Negative |
| P07093 | FLLASVTLPISCSHFNPLSL | Negative |
| P07093 | LASVTLPISCSHFNPLSLEE | Negative |
| P07093 | PLFLLASVTLPISCSHFNPL | Negative |
| P07093 | WHLPLFLLASVTLPISCSHF | Negative |
| P07093 | SLEELGSNTGIQVFNQIVKS | Negative |
| P07093 | PSICSHFNPLSLEELGSNTG | Negative |
| P07093 | LPSICSHFNPLSLEELGSNT | Negative |
| P07093 | MNWHLPLFLLASVTLPISCS | Negative |
| P07093 | ASVTLPISCSHFNPLSLEEL | Negative |
| P07093 | NWHLPLFLLASVTLPISCSH | Negative |
| P07093 | SVTLPSICSHFNPLSLEELG | Negative |
| P07098 | ASLISVLGTTHGLFGKLHPG | Negative |
| P07098 | MASLISVLGTTHGLFGKLHP | Negative |
| P07098 | TMASLISVLGTTHGLFGKLH | Negative |
| P07098 | GLFGKLHPGSPEVTMNISQM | Negative |
| P07098 | LGTTHGLFGKLHPGSPEVTM | Negative |
| P07098 | SPEVTMNISQMITYWGYNE  | Negative |
| P07098 | THGLFGKLHPGSPEVTMNIS | Negative |
| P07098 | KLHPGSPEVTMNISQMITYW | Negative |
| P07098 | ISVLGTTHGLFGKLHPGSPE | Negative |
| P07098 | SLISVLGTTHGLFGKLHPGS | Negative |
| P07098 | HPGSPEVTMNISQMITYWGY | Negative |
| P07098 | TTHGLFGKLHPGSPEVTMNI | Negative |
| P07098 | LLTMASLISVLGTTHGLFGK | Negative |
| P07098 | FGKLHPGSPEVTMNISQMIT | Negative |
| P07098 | MWLLLTMASLISVLGTTHGL | Negative |
| P07098 | LHPGSPEVTMNISQMITYWG | Negative |
| P07098 | LFGKLHPGSPEVTMNISQMI | Negative |
| P07098 | GSPEVTMNISQMITYWGYPN | Negative |
| P07098 | LISVLGTTHGLFGKLHPGSP | Negative |
| P07098 | GTTHGLFGKLHPGSPEVTMN | Negative |
| P07098 | VLGTTHGLFGKLHPGSPEVT | Negative |
| P07098 | HGLFGKLHPGSPEVTMNISQ | Negative |
| P07098 | GKLHPGSPEVTMNISQMITY | Negative |
| P07098 | PGSPEVTMNISQMITYWGYP | Negative |
| P07098 | PEVTMNISQMITYWGYPNEE | Negative |
| P07098 | WLLLTMASLISVLGTTHGLF | Negative |
| P07098 | LLLTMASLISVLGTTHGLFG | Negative |
| P07098 | SVLGTTHGLFGKLHPGSPEV | Negative |
| P07098 | EVTMNISQMITYWGYPNEEY | Negative |
| P07102 | QSAFAQSEPELKLESVVIVS | Negative |

|        |                      |          |
|--------|----------------------|----------|
| P07102 | LIPLTPQSAFAQSEPELKLE | Negative |
| P07102 | MKAILIPFLSLLIPLTPQSA | Negative |
| P07102 | EPELKLESVVIVSRHGVRAP | Negative |
| P07102 | QSEPELKLESVVIVSRHGVR | Negative |
| P07102 | KLESVVIVSRHGVRAPTKAT | Negative |
| P07102 | LKLESVVIVSRHGVRAPTKA | Negative |
| P07102 | PELKLESVVIVSRHGVRAPT | Negative |
| P07102 | LSLLIPLTPQSAFAQSEPEL | Negative |
| P07102 | IPFLSLLIPLTPQSAFAQSE | Negative |
| P07102 | AQSEPELKLESVVIVSRHGV | Negative |
| P07102 | KAILIPFLSLLIPLTPQSAF | Negative |
| P07102 | LIPFLSLLIPLTPQSAFAQS | Negative |
| P07102 | IPLTPQSAFAQSEPELKLES | Negative |
| P07102 | PFLSLLIPLTPQSAFAQSEP | Negative |
| P07102 | LESVVIVSRHGVRAPTKATQ | Negative |
| P07102 | TPQSAFAQSEPELKLESVVI | Negative |
| P07102 | SLLIPLTPQSAFAQSEPELK | Negative |
| P07102 | AFAQSEPELKLESVVIVSRH | Negative |
| P07102 | FAQSEPELKLESVVIVSRHG | Negative |
| P07102 | SAFAQSEPELKLESVVIVSR | Negative |
| P07102 | ILIPFLSLLIPLTPQSAFAQ | Negative |
| P07102 | LTPQSAFAQSEPELKLESVV | Negative |
| P07102 | PQSAFAQSEPELKLESVVIV | Negative |
| P07102 | PLTPQSAFAQSEPELKLESV | Negative |
| P07102 | AILIPFLSLLIPLTPQSAFA | Negative |
| P07102 | SEPELKLESVVIVSRHGVRA | Negative |
| P07102 | ELKLESVVIVSRHGVRAPTK | Negative |
| P07102 | LLIPLTPQSAFAQSEPELKL | Negative |
| P07151 | TPQIQVYSRHPPENGKPNFL | Negative |
| P07151 | VTVIFLVLVSLAVVLAIQKT | Negative |
| P07151 | PQIQVYSRHPPENGKPNFLN | Negative |
| P07151 | RSVTVIFLVLVSLAVVLAIQ | Negative |
| P07151 | MARSVTVIFLVLVSLAVVLA | Negative |
| P07151 | VSLAVVLAIQKTPQIQVYSR | Negative |
| P07151 | QVYSRHPPENGKPNFLNCYV | Negative |
| P07151 | FLVLVSLAVVLAIQKTPQIQ | Negative |
| P07151 | YSRHPPENGKPNFLNCYVSQ | Negative |
| P07151 | LAIQKTPQIQVYSRHPPENG | Negative |
| P07151 | SVTVIFLVLVSLAVVLAIQK | Negative |
| P07151 | VLVSLAVVLAIQKTPQIQVY | Negative |
| P07151 | LVSLAVVLAIQKTPQIQVYS | Negative |
| P07151 | IFLVLVSLAVVLAIQKTPQI | Negative |
| P07151 | QKTPQIQVYSRHPPENGKPN | Negative |
| P07151 | AIQKTPQIQVYSRHPPENGK | Negative |
| P07151 | AVVLAIQKTPQIQVYSRHPP | Negative |
| P07151 | VLAIQKTPQIQVYSRHPPEN | Negative |

|        |                      |          |
|--------|----------------------|----------|
| P07151 | VVLAIQKTPQIQVYSRHPPE | Negative |
| P07151 | LVLVSLAVVLAIQKTPQIQV | Negative |
| P07151 | ARSVTVIFLVLVSLAVVLAI | Negative |
| P07151 | QIQVYSRHPPENGKPNFLNC | Negative |
| P07151 | IQKTPQIQVYSRHPPENGKP | Negative |
| P07151 | VIFLVLVSLAVVLAIQKTPQ | Negative |
| P07151 | IQVYSRHPPENGKPNFLNCY | Negative |
| P07151 | SLAVVLAIQKTPQIQVYSRH | Negative |
| P07151 | LAVVLAIQKTPQIQVYSRHP | Negative |
| P07151 | KTPQIQVYSRHPPENGKPNF | Negative |
| P07151 | VYSRHPPENGKPNFLNCYVS | Negative |
| P07154 | LCLGTALATPKFDQTFNAQW | Negative |
| P07154 | FDQTFNAQWHQWKSTHRRLY | Negative |
| P07154 | KFDQTFNAQWHQWKSTHRRL | Negative |
| P07154 | AQWHQWKSTHRRLYGTNEEE | Negative |
| P07154 | LATPKFDQTFNAQWHQWKST | Negative |
| P07154 | ATPKFDQTFNAQWHQWKSTH | Negative |
| P07154 | QTFNAQWHQWKSTHRRLYGT | Negative |
| P07154 | DQTFNAQWHQWKSTHRRLYG | Negative |
| P07154 | TPKFDQTFNAQWHQWKSTHR | Negative |
| P07154 | VLCLGTALATPKFDQTFNAQ | Negative |
| P07154 | WHQWKSTHRRLYGTNEEEWR | Negative |
| P07154 | TALATPKFDQTFNAQWHQWK | Negative |
| P07154 | LGTALATPKFDQTFNAQWHQ | Negative |
| P07154 | CLGTALATPKFDQTFNAQWH | Negative |
| P07154 | FNAQWHQWKSTHRRLYGTNE | Negative |
| P07154 | MTPLLLAVLCLGTALATPK  | Negative |
| P07154 | HQWKSTHRRLYGTNEEEWRR | Negative |
| P07154 | AVLCLGTALATPKFDQTFNA | Negative |
| P07154 | LLAVLCLGTALATPKFDQT  | Negative |
| P07154 | LLAVLCLGTALATPKFDQTF | Negative |
| P07154 | GTALATPKFDQTFNAQWHQW | Negative |
| P07154 | PKFDQTFNAQWHQWKSTHRR | Negative |
| P07154 | LAVLCLGTALATPKFDQTFN | Negative |
| P07154 | NAQWHQWKSTHRRLYGTNEE | Negative |
| P07154 | ALATPKFDQTFNAQWHQWKS | Negative |
| P07154 | TPLLLLAVLCLGTALATPKF | Negative |
| P07154 | LLLAVLCLGTALATPKFDQ  | Negative |
| P07154 | TFNAQWHQWKSTHRRLYGTN | Negative |
| P07154 | QWHQWKSTHRRLYGTNEEEW | Negative |
| P07214 | VEEETVVEETGVPVGANPVQ | Negative |
| P07214 | EIVEEETVVEETGVPVGANP | Negative |
| P07214 | AGRALAAPQQTEVAEEIVEE | Negative |
| P07214 | QQTEVAEEIVEEETVVEETG | Negative |
| P07214 | RALAAPQQTEVAEEIVEEET | Negative |
| P07214 | LAGRALAAPQQTEVAEEIVE | Negative |

|        |                      |          |
|--------|----------------------|----------|
| P07214 | GRALAAPQQTEVAEEIVEEE | Negative |
| P07214 | FLLCLAGRALAAPQQTEVA  | Negative |
| P07214 | LCLAGRALAAPQQTEVAEEI | Negative |
| P07214 | LLCLAGRALAAPQQTEVAEE | Negative |
| P07214 | PQQTEVAEEIVEEETVVEET | Negative |
| P07214 | VAEEIVEEETVVEETGVPVG | Negative |
| P07214 | TEVAEEIVEEETVVEETGVP | Negative |
| P07214 | APQQTEVAEEIVEEETVVEE | Negative |
| P07214 | LAAPQQTEVAEEIVEEETVV | Negative |
| P07214 | WIFLLCLAGRALAAPQQTE  | Negative |
| P07214 | FLLCLAGRALAAPQQTEVAE | Negative |
| P07214 | IVEEETVVEETGVPVGANPV | Negative |
| P07214 | MRAWIFLLCLAGRALAAPQ  | Negative |
| P07214 | AEEIVEEETVVEETGVPVGA | Negative |
| P07214 | AAPQQTEVAEEIVEEETVVE | Negative |
| P07214 | IFFLLCLAGRALAAPQQTEV | Negative |
| P07214 | EVAEEIVEEETVVEETGVPV | Negative |
| P07214 | EEETVVEETGVPVGANPVQV | Negative |
| P07214 | QTEVAEEIVEEETVVEETGV | Negative |
| P07214 | CLAGRALAAPQQTEVAEEIV | Negative |
| P07214 | EEIVEEETVVEETGVPVGAN | Negative |
| P07214 | ALAAPQQTEVAEEIVEEETV | Negative |
| P07214 | RAWIFLLCLAGRALAAPQQ  | Negative |
| P07221 | LVLGSPQSGVHGEEGLDFPE | Negative |
| P07221 | RMGARVALLLLLVLGSPQSG | Negative |
| P07221 | QSGVHGEEGLDFPEYDGVDR | Negative |
| P07221 | SGVHGEEGLDFPEYDGVDRV | Negative |
| P07221 | AADRMGARVALLLLLVLGSP | Negative |
| P07221 | DRMGARVALLLLLVLGSPQS | Negative |
| P07221 | MGARVALLLLLVLGSPQSGV | Negative |
| P07221 | LLLVLGSPQSGVHGEEGLDF | Negative |
| P07221 | LGSPQSGVHGEEGLDFPEYD | Negative |
| P07221 | PQSGVHGEEGLDFPEYDGV  | Negative |
| P07221 | LLLLLVLGSPQSGVHGEEGL | Negative |
| P07221 | ARVALLLLLVLGSPQSGVHG | Negative |
| P07221 | VLGSPQSGVHGEEGLDFPEY | Negative |
| P07221 | HGEEGLDFPEYDGVDRVINV | Negative |
| P07221 | EEGLDFPEYDGVDRVINVNA | Negative |
| P07221 | ADRMGARVALLLLLVLGSPQ | Negative |
| P07221 | SPQSGVHGEEGLDFPEYDGV | Negative |
| P07221 | GARVALLLLLVLGSPQSGVH | Negative |
| P07221 | NAADRMGARVALLLLLVLGS | Negative |
| P07221 | ALLLLLVLGSPQSGVHGEEG | Negative |
| P07221 | VHGEEGLDFPEYDGVDRVIN | Negative |
| P07221 | EGLDFPEYDGVDRVINVNAK | Negative |
| P07221 | LLVLGSPQSGVHGEEGLDFP | Negative |

|        |                        |          |
|--------|------------------------|----------|
| P07221 | RVALLLLLVLGSPQSGVHGE   | Negative |
| P07221 | MNAADRMGARVALLLLLVLG   | Negative |
| P07221 | VALLLLLVLGSPQSGVHGEE   | Negative |
| P07221 | GVHGEEGLDFPEYDGVDRVI   | Negative |
| P07221 | GEEGLDFPEYDGVDRVINVN   | Negative |
| P07221 | GSPQSGVHGEEGLDFPEYDG   | Negative |
| P07237 | EDHVLVLRKSNFAEALAAHK   | Negative |
| P07237 | VRADAPEEEDHVLVLRKSNF   | Negative |
| P07237 | ALVRADAPEEEDHVLVLRKS   | Negative |
| P07237 | CLAVAALVRADAPEEEDHVL   | Negative |
| P07237 | ADAPEEEDHVLVLRKSNFAE   | Negative |
| P07237 | LAVAALVRADAPEEEDHVLV   | Negative |
| P07237 | EEEDHVLVLRKSNFAEALAA   | Negative |
| P07237 | MLRRALLCLAVAALVRADAP   | Negative |
| P07237 | LCLAVAALVRADAPEEEDHV   | Negative |
| P07237 | LRKSNFAEALAAHKYLLVEF   | Negative |
| P07237 | RKSNFAEALAAHKYLLVEFY   | Negative |
| P07237 | HVLVLRKSNFAEALAAHKYL   | Negative |
| P07237 | RADAPEEEDHVLVLRKSNFA   | Negative |
| P07237 | PEEEDHVLVLRKSNFAEALA   | Negative |
| P07237 | VAALVRADAPEEEDHVLVLR   | Negative |
| P07237 | APEEEDHVLVLRKSNFAEAL   | Negative |
| P07237 | LVRADAPEEEDHVLVLRKSN   | Negative |
| P07237 | VLVLRKSNFAEALAAHKYLL   | Negative |
| P07237 | LVLVLRKSNFAEALAAHKYLLV | Negative |
| P07237 | VLRKSNFAEALAAHKYLLVE   | Negative |
| P07237 | DHVLVLRKSNFAEALAAHKY   | Negative |
| P07237 | EEDHVLVLRKSNFAEALAAH   | Negative |
| P07237 | LLCLAVAALVRADAPEEEDH   | Negative |
| P07237 | AALVRADAPEEEDHVLVLRK   | Negative |
| P07237 | ALLCLAVAALVRADAPEEED   | Negative |
| P07237 | RALLCLAVAALVRADAPEEE   | Negative |
| P07237 | AVAALVRADAPEEEDHVLVL   | Negative |
| P07237 | DAPEEEDHVLVLRKSNFAEA   | Negative |
| P07237 | LRRALLCLAVAALVRADAPE   | Negative |
| P07254 | RKFNKPLLALLIGSTLCSAA   | Negative |
| P07254 | STLCSAAQAAAPGKPTIAWG   | Negative |
| P07254 | PGKPTIAWGNTKFAIVEVDQ   | Negative |
| P07254 | MRKFNKPLLALLIGSTLCSA   | Negative |
| P07254 | IGSTLCSAAQAAAPGKPTIA   | Negative |
| P07254 | AAQAAAPGKPTIAWGNTKFA   | Negative |
| P07254 | ALLIGSTLCSAAQAAAPGKP   | Negative |
| P07254 | PTIAWGNTKFAIVEVDQAAT   | Negative |
| P07254 | LIGSTLCSAAQAAAPGKPTI   | Negative |
| P07254 | GKPTIAWGNTKFAIVEVDQA   | Negative |
| P07254 | AQAAAPGKPTIAWGNTKFAI   | Negative |

|        |                      |          |
|--------|----------------------|----------|
| P07254 | KPLLALLIGSTLCSAAQAAA | Negative |
| P07254 | FNKPLLALLIGSTLCSAAQA | Negative |
| P07254 | PLLALLIGSTLCSAAQAAAP | Negative |
| P07254 | KPTIAWGNTKFAIVEVDQAA | Negative |
| P07254 | KFNKPLLALLIGSTLCSAAQ | Negative |
| P07254 | TLCSAAQAAAPGKPTIAWGN | Negative |
| P07254 | APGKPTIAWGNTKFAIVEVD | Negative |
| P07254 | AAAPGKPTIAWGNTKFAIVE | Negative |
| P07254 | TIAWGNTKFAIVEVDQAATA | Negative |
| P07254 | CSAAQAAAPGKPTIAWGNTK | Negative |
| P07254 | SAAQAAAPGKPTIAWGNTKF | Negative |
| P07254 | LLIGSTLCSAAQAAAPGKPT | Negative |
| P07254 | AAPGKPTIAWGNTKFAIVEV | Negative |
| P07254 | GSTLCSAAQAAAPGKPTIAW | Negative |
| P07254 | NKPLLALLIGSTLCSAAQAA | Negative |
| P07254 | QAAAPGKPTIAWGNTKFAIV | Negative |
| P07254 | LCSAAQAAAPGKPTIAWGNT | Negative |
| P07254 | LLALLIGSTLCSAAQAAAPG | Negative |
| P07267 | AAKVHKAKIYKHELSDMKE  | Negative |
| P07267 | LLLVSANQVAAKVHKAKIYK | Negative |
| P07267 | AKIYKHELSDMKEVTFEQH  | Negative |
| P07267 | QVAAKVHKAKIYKHELSDM  | Negative |
| P07267 | VHKAKIYKHELSDMKEVTF  | Negative |
| P07267 | ALLPLALLVSANQVAAKVH  | Negative |
| P07267 | VAAKVHKAKIYKHELSDMK  | Negative |
| P07267 | VSANQVAAKVHKAKIYKHEL | Negative |
| P07267 | KAKIYKHELSDMKEVTFEQ  | Negative |
| P07267 | KALLPLALLVSANQVAAKV  | Negative |
| P07267 | LLPLALLVSANQVAAKVHK  | Negative |
| P07267 | LKALLPLALLVSANQVAAK  | Negative |
| P07267 | SLKALLPLALLVSANQVAA  | Negative |
| P07267 | LLVSANQVAAKVHKAKIYKH | Negative |
| P07267 | YKHELSDMKEVTFEQHLAH  | Negative |
| P07267 | MFSLKALLPLALLVSANQV  | Negative |
| P07267 | LVSANQVAAKVHKAKIYKHE | Negative |
| P07267 | PLALLVSANQVAAKVHKAK  | Negative |
| P07267 | NQVAAKVHKAKIYKHELSD  | Negative |
| P07267 | SANQVAAKVHKAKIYKHEL  | Negative |
| P07267 | HKAKIYKHELSDMKEVTFE  | Negative |
| P07267 | KVHKAKIYKHELSDMKEVT  | Negative |
| P07267 | FSLKALLPLALLVSANQVA  | Negative |
| P07267 | AKVHKAKIYKHELSDMKEV  | Negative |
| P07267 | ALLVSANQVAAKVHKAKIY  | Negative |
| P07267 | KIYKHELSDMKEVTFEQHL  | Negative |
| P07267 | ANQVAAKVHKAKIYKHELSD | Negative |
| P07267 | IYKHELSDMKEVTFEQHLA  | Negative |



|        |                      |          |
|--------|----------------------|----------|
| P07267 | LALLVSPANQVAAKVHKAKI | Negative |
| P07288 | ILSRIVGGWECEKHSQPWQV | Negative |
| P07288 | PLILSRIVGGWECEKHSQPW | Negative |
| P07288 | ECEKHSQPWQVLVASRGRAV | Negative |
| P07288 | VVFLTLSVTWIGAAPLILSR | Negative |
| P07288 | WIGAAPLILSRIVGGWECEK | Negative |
| P07288 | TLSVTWIGAAPLILSRIVGG | Negative |
| P07288 | GGWECEKHSQPWQVLVASRG | Negative |
| P07288 | VTWIGAAPLILSRIVGGWEC | Negative |
| P07288 | GWECEKHSQPWQVLVASRGR | Negative |
| P07288 | SRIVGGWECEKHSQPWQVLV | Negative |
| P07288 | IVGGWECEKHSQPWQVLVAS | Negative |
| P07288 | LILSRIVGGWECEKHSQPWQ | Negative |
| P07288 | LSVTWIGAAPLILSRIVGGW | Negative |
| P07288 | WECEKHSQPWQVLVASRGRA | Negative |
| P07288 | MWVPVVFLTLSVTWIGAAPL | Negative |
| P07288 | TWIGAAPLILSRIVGGWECE | Negative |
| P07288 | VFLTLSVTWIGAAPLILSRI | Negative |
| P07288 | RIVGGWECEKHSQPWQVLVA | Negative |
| P07288 | GAAPLILSRIVGGWECEKHS | Negative |
| P07288 | PVVFLTLSVTWIGAAPLILS | Negative |
| P07288 | APLILSRIVGGWECEKHSQP | Negative |
| P07288 | LSRIVGGWECEKHSQPWQVL | Negative |
| P07288 | FLTLSVTWIGAAPLILSRIV | Negative |
| P07288 | LTLSTWIGAAPLILSRIVG  | Negative |
| P07288 | SVTWIGAAPLILSRIVGGWE | Negative |
| P07288 | IGAAPLILSRIVGGWECEKH | Negative |
| P07288 | WVPVVFLTLSVTWIGAAPLI | Negative |
| P07288 | VGGWECEKHSQPWQVLVASR | Negative |
| P07288 | AAPLILSRIVGGWECEKHSQ | Negative |
| P07380 | LDLQEVAGRWHSVAMVASDI | Negative |
| P07380 | IPQTMQDLDLQEVAGRWHSV | Negative |
| P07380 | MCGNQATDIPQTMQDLDLQE | Negative |
| P07380 | ALGLSLMCGNQATDIPQTMQ | Negative |
| P07380 | SLMCGNQATDIPQTMQDLDL | Negative |
| P07380 | GLSLMCGNQATDIPQTMQDL | Negative |
| P07380 | NQATDIPQTMQDLDLQEVAG | Negative |
| P07380 | LSLMCGNQATDIPQTMQDL  | Negative |
| P07380 | LGLSLMCGNQATDIPQTMQD | Negative |
| P07380 | CGNQATDIPQTMQDLDLQEV | Negative |
| P07380 | PQTMQDLDLQEVAGRWHVA  | Negative |
| P07380 | TMQDLDLQEVAGRWHSVAMV | Negative |
| P07380 | LQEVAGRWHSVAMVASDISL | Negative |
| P07380 | MKCLLLALGLSLMCGNQATD | Negative |
| P07380 | QATDIPQTMQDLDLQEVAGR | Negative |
| P07380 | DIPQTMQDLDLQEVAGRWS  | Negative |

|        |                       |          |
|--------|-----------------------|----------|
| P07380 | DLDLQEVAGRWHSVAMVASD  | Negative |
| P07380 | ATDIPQTMQDLDLQEVAGRW  | Negative |
| P07380 | KCLLLALGLSLMCGNQATDI  | Negative |
| P07380 | QTMQDLDLQEVAGRWHSVAM  | Negative |
| P07380 | GNQATDIPQTMQDLDLQEVA  | Negative |
| P07380 | DLQEVAGRWHSVAMVASDIS  | Negative |
| P07380 | LALGLSLMCGNQATDIPQTM  | Negative |
| P07380 | TDIPQTMQDLDLQEVAGRWH  | Negative |
| P07380 | LMCGNQATDIPQTMQDLDLQ  | Negative |
| P07380 | CLLLALGLSLMCGNQATDIP  | Negative |
| P07380 | QDLDLQEVAGRWHSVAMVAS  | Negative |
| P07380 | MQDLDLQEVAGRWHSVAMVA  | Negative |
| P07380 | LLALGLSLMCGNQATDIPQT  | Negative |
| P07439 | QAVTLLVVVFAITTAECTCP  | Negative |
| P07439 | VVFAITTAECTCPGNLDWQE  | Negative |
| P07439 | NLDWQEYDGHICYWASTYQVR | Negative |
| P07439 | LLVVVFAITTAECTCPGNLD  | Negative |
| P07439 | GNLDWQEYDGHICYWASTYQV | Negative |
| P07439 | IVQAVTLLVVVFAITTAECT  | Negative |
| P07439 | ECTCPGNLDWQEYDGHICYWA | Negative |
| P07439 | LVVVFAITTAECTCPGNLDW  | Negative |
| P07439 | CTCPGNLDWQEYDGHICYWAS | Negative |
| P07439 | FAITTAECTCPGNLDWQEYD  | Negative |
| P07439 | MQRSEIVQAVTLLVVVFAIT  | Negative |
| P07439 | VFAITTAECTCPGNLDWQEY  | Negative |
| P07439 | QRSEIVQAVTLLVVVFAITT  | Negative |
| P07439 | EIVQAVTLLVVVFAITTAEC  | Negative |
| P07439 | LDWQEYDGHICYWASTYQVRW | Negative |
| P07439 | TLLVVVFAITTAECTCPGNL  | Negative |
| P07439 | RSEIVQAVTLLVVVFAITTA  | Negative |
| P07439 | TCPGNLDWQEYDGHICYWAST | Negative |
| P07439 | ITTAECTCPGNLDWQEYDGH  | Negative |
| P07439 | PGNLDWQEYDGHICYWASTYQ | Negative |
| P07439 | SEIVQAVTLLVVVFAITTAEC | Negative |
| P07439 | AECTCPGNLDWQEYDGHICYW | Negative |
| P07439 | VQAVTLLVVVFAITTAECTC  | Negative |
| P07439 | TAECTCPGNLDWQEYDGHICY | Negative |
| P07439 | AVTLLVVVFAITTAECTCPG  | Negative |
| P07439 | TTAECTCPGNLDWQEYDGHIC | Negative |
| P07439 | CPGNLDWQEYDGHICYWASTY | Negative |
| P07439 | VVVFAITTAECTCPGNLDWQ  | Negative |
| P07439 | AITTAECTCPGNLDWQEYDG  | Negative |
| P07456 | ITAGKSVLVLLAFLAFASCC  | Negative |
| P07456 | AGKSVLVLLAFLAFASCCYA  | Negative |
| P07456 | YRPSETLCGGELVDTLQFVC  | Negative |
| P07456 | LLAFLAFASCCYAAAYRPSET | Negative |

|        |                       |          |
|--------|-----------------------|----------|
| P07456 | CCYAAAYRPSETLCGGELVDT | Negative |
| P07456 | FASCCYAAAYRPSETLCGGEL | Negative |
| P07456 | MGITAGKSVLVLLAFLAFAS  | Negative |
| P07456 | AFASCCYAAAYRPSETLCGGE | Negative |
| P07456 | PSETLCGGELVDTLQFVCGD  | Negative |
| P07456 | VLVLLAFLAFASCCYAAAYRP | Negative |
| P07456 | SETLCGGELVDTLQFVCGDR  | Negative |
| P07456 | AAAYRPSETLCGGELVDTLQF | Negative |
| P07456 | AYRPSETLCGGELVDTLQFV  | Negative |
| P07456 | SVLVLLAFLAFASCCYAAAYR | Negative |
| P07456 | FLAFASCCYAAAYRPSETLCG | Negative |
| P07456 | SCCYAAAYRPSETLCGGELVD | Negative |
| P07456 | VLLAFLAFASCCYAAAYRPSE | Negative |
| P07456 | LAFLAFASCCYAAAYRPSETL | Negative |
| P07456 | YAAAYRPSETLCGGELVDTLQ | Negative |
| P07456 | GKSVLVLLAFLAFASCCYAA  | Negative |
| P07456 | CYAAAYRPSETLCGGELVDTL | Negative |
| P07456 | LAFASCCYAAAYRPSETLCGG | Negative |
| P07456 | RPSETLCGGELVDTLQFVCG  | Negative |
| P07456 | AFLAFASCCYAAAYRPSETLC | Negative |
| P07456 | TAGKSVLVLLAFLAFASCCY  | Negative |
| P07456 | ASCCYAAAYRPSETLCGGELV | Negative |
| P07456 | ETLCGGELVDTLQFVCGDRG  | Negative |
| P07456 | KSVLVLLAFLAFASCCYAAAY | Negative |
| P07456 | GITAGKSVLVLLAFLAFASC  | Negative |
| P07457 | SVILTGLLFVLLCVDHMTAS  | Negative |
| P07457 | VVATQLIPINTALTPAMMEG  | Negative |
| P07457 | LLFVLLCVDHMTASQSVVAT  | Negative |
| P07457 | TGLLFVLLCVDHMTASQSVV  | Negative |
| P07457 | LIPINTALTPAMMEGKVTNP  | Negative |
| P07457 | MTASQSVVATQLIPINTALT  | Negative |
| P07457 | FVLLCVDHMTASQSVVATQL  | Negative |
| P07457 | VDHMTASQSVVATQLIPINT  | Negative |
| P07457 | TQLIPINTALTPAMMEGKVT  | Negative |
| P07457 | VLLCVDHMTASQSVVATQLI  | Negative |
| P07457 | VILTGLLFVLLCVDHMTASQ  | Negative |
| P07457 | LLCVDHMTASQSVVATQLIP  | Negative |
| P07457 | ASQSVVATQLIPINTALTPA  | Negative |
| P07457 | ILTGLLFVLLCVDHMTASQS  | Negative |
| P07457 | HMTASQSVVATQLIPINTAL  | Negative |
| P07457 | DHMTASQSVVATQLIPINTA  | Negative |
| P07457 | TASQSVVATQLIPINTALTP  | Negative |
| P07457 | ATQLIPINTALTPAMMEGKV  | Negative |
| P07457 | LTGLLFVLLCVDHMTASQSV  | Negative |
| P07457 | LCVDHMTASQSVVATQLIPI  | Negative |
| P07457 | SVVATQLIPINTALTPAMME  | Negative |

|        |                       |          |
|--------|-----------------------|----------|
| P07457 | QLIPINTALTPAMMEGKVTN  | Negative |
| P07457 | KSVILTGLLFVLLCVDHMTA  | Negative |
| P07457 | QSVVATQLIPINTALTPAMM  | Negative |
| P07457 | LFVLLCVDHMTASQSVVATQ  | Negative |
| P07457 | MKSVILTGLLFVLLCVDHMT  | Negative |
| P07457 | CVDHMTASQSVVATQLIPIN  | Negative |
| P07457 | VATQLIPINTALTPAMMEGK  | Negative |
| P07457 | SQSVVATQLIPINTALTPAM  | Negative |
| P07474 | LSVFLHILHSFPDGEFAMQG  | Negative |
| P07474 | ILATLSVFLHILHSFPDGEF  | Negative |
| P07474 | HILHSFPDGEFAMQGCPECK  | Negative |
| P07474 | FPDGEFAMQGCPECKLKENK  | Negative |
| P07474 | EFAMQGCPECKLKENKYFSK  | Negative |
| P07474 | AAVILATLSVFLHILHSFPD  | Negative |
| P07474 | KYAAVILATLSVFLHILHSF  | Negative |
| P07474 | SFPDGEFAMQGCPECKLKEN  | Negative |
| P07474 | DGEFAMQGCPECKLKENKYF  | Negative |
| P07474 | FAMQGCPECKLKENKYFSKL  | Negative |
| P07474 | VFLHILHSFPDGEFAMQGCP  | Negative |
| P07474 | LHILHSFPDGEFAMQGCPEC  | Negative |
| P07474 | GEFAMQGCPECKLKENKYFS  | Negative |
| P07474 | MGYYRKYAAVILATLSVFLH  | Negative |
| P07474 | FLHILHSFPDGEFAMQGCPE  | Negative |
| P07474 | ILHSFPDGEFAMQGCPECKL  | Negative |
| P07474 | YYRKYAAVILATLSVFLHIL  | Negative |
| P07474 | RKYAAVILATLSVFLHILHS  | Negative |
| P07474 | LATLSVFLHILHSFPDGEFA  | Negative |
| P07474 | YAAVILATLSVFLHILHSFP  | Negative |
| P07474 | HSFPDGEFAMQGCPECKLKE  | Negative |
| P07474 | GYRKYAAVILATLSVFLHI   | Negative |
| P07474 | SVFLHILHSFPDGEFAMQGC  | Negative |
| P07474 | ATLSVFLHILHSFPDGEFAM  | Negative |
| P07474 | YRKYAAVILATLSVFLHILH  | Negative |
| P07474 | AVILATLSVFLHILHSFPDG  | Negative |
| P07474 | LHSFPDGEFAMQGCPECKLK  | Negative |
| P07474 | TLVFLHILHSFPDGEFAMQ   | Negative |
| P07474 | PDGEFAMQGCPECKLKENKY  | Negative |
| P07479 | AVLCQGDPVVDSGDVAVQLN  | Negative |
| P07479 | GDPVVDSGDVAVQLNLGGRY  | Negative |
| P07479 | VVDSDGDVAVQLNLGGRYPLY | Negative |
| P07479 | AASNALLISGALLISLAVL   | Negative |
| P07479 | SNALLISGALLISLAVLCQ   | Negative |
| P07479 | LISLAVLCQGDPVVDSGD    | Negative |
| P07479 | GALLISLAVLCQGDPVVDS   | Negative |
| P07479 | SDGDVAVQLNLGGRYPLYTIE | Negative |
| P07479 | LAVLCQGDPVVDSGDVAVQL  | Negative |

|        |                        |          |
|--------|------------------------|----------|
| P07479 | ALLISLAVLCQGDPVVDSGD   | Negative |
| P07479 | LCQGDPVVDSGDGDAVQLNLG  | Negative |
| P07479 | VDSGDGDAVQLNLGGRYPLYT  | Negative |
| P07479 | SLAVLCQGDPVVDSGDGDAVQ  | Negative |
| P07479 | ASNALLISGALLISLAVLC    | Negative |
| P07479 | MAASNALLISGALLISLAV    | Negative |
| P07479 | DSDGDGDAVQLNLGGRYPLYTI | Negative |
| P07479 | LISGALLISLAVLCQGDPVV   | Negative |
| P07479 | CQGDPVVDSGDGDAVQLNLGG  | Negative |
| P07479 | DPVVDSGDGDAVQLNLGGRYP  | Negative |
| P07479 | SGALLISLAVLCQGDPVVDS   | Negative |
| P07479 | VLCQGDPVVDSGDGDAVQLNL  | Negative |
| P07479 | ALLISGALLISLAVLCQGD    | Negative |
| P07479 | LLISLAVLCQGDPVVDSGDG   | Negative |
| P07479 | PVVDSGDGDAVQLNLGGRYPL  | Negative |
| P07479 | LLISGALLISLAVLCQGDP    | Negative |
| P07479 | LLISGALLISLAVLCQGDPV   | Negative |
| P07479 | ISLAVLCQGDPVVDSGDGDAV  | Negative |
| P07479 | NALLISGALLISLAVLCQG    | Negative |
| P07479 | QGDPVVDSGDGDAVQLNLGGR  | Negative |
| P07497 | LVVLLAFIAPAQAADLAHGG   | Negative |
| P07497 | GGQVFSANCAACHLGGRNVV   | Negative |
| P07497 | LGTAIAALVVLLAFIAPAQA   | Negative |
| P07497 | KRILGTAIAALVVLLAFIAP   | Negative |
| P07497 | ALVVLLAFIAPAQAADLAHG   | Negative |
| P07497 | AIAALVVLLAFIAPAQAADL   | Negative |
| P07497 | RILGTAIAALVVLLAFIAPA   | Negative |
| P07497 | VLLAFIAPAQAADLAHGGQV   | Negative |
| P07497 | AQAADLAHGGQVFSANCAAC   | Negative |
| P07497 | APAQAADLAHGGQVFSANCA   | Negative |
| P07497 | QAADLAHGGQVFSANCAACH   | Negative |
| P07497 | AADLAHGGQVFSANCAACHL   | Negative |
| P07497 | TAIAALVVLLAFIAPAQAAD   | Negative |
| P07497 | VVLLAFIAPAQAADLAHGGQ   | Negative |
| P07497 | FIAPAQAADLAHGGQVFSAN   | Negative |
| P07497 | ILGTAIAALVVLLAFIAPAQ   | Negative |
| P07497 | HGGQVFSANCAACHLGGRNV   | Negative |
| P07497 | MKRILGTAIAALVVLLAFIA   | Negative |
| P07497 | LAFIAPAQAADLAHGGQVFS   | Negative |
| P07497 | AHGGQVFSANCAACHLGGRN   | Negative |
| P07497 | LAHGGQVFSANCAACHLGGR   | Negative |
| P07497 | GTAIAALVVLLAFIAPAQAA   | Negative |
| P07497 | ADLAHGGQVFSANCAACHLG   | Negative |
| P07497 | AFIAPAQAADLAHGGQVFS    | Negative |
| P07497 | PAQAADLAHGGQVFSANCAA   | Negative |
| P07497 | IAPAQAADLAHGGQVFSANC   | Negative |

|        |                      |          |
|--------|----------------------|----------|
| P07497 | DLAHGGQVFSANCAACHLGG | Negative |
| P07497 | LLAFIAPAQAADLAHGGQVF | Negative |
| P07497 | IAALVLLAFIAPAQAADLA  | Negative |
| P07507 | SLLLLSILAALAVAALCYES | Negative |
| P07507 | HESLESYEINPFINRRNANS | Negative |
| P07507 | LESYEINPFINRRNANSFIS | Negative |
| P07507 | AVAALCYESHESLESYEINP | Negative |
| P07507 | SILAALAVAALCYESHESLE | Negative |
| P07507 | YEINPFINRRNANSFISPQQ | Negative |
| P07507 | MKSLLLLSILAALAVAALCY | Negative |
| P07507 | ESYEINPFINRRNANSFISP | Negative |
| P07507 | LCYESHESLESYEINPFINR | Negative |
| P07507 | ESLESYEINPFINRRNANSF | Negative |
| P07507 | KSLLLLSILAALAVAALCYE | Negative |
| P07507 | ILAALAVAALCYESHESLES | Negative |
| P07507 | LLSILAALAVAALCYESHES | Negative |
| P07507 | SLESYEINPFINRRNANSFI | Negative |
| P07507 | AALAVAALCYESHESLESYE | Negative |
| P07507 | CYESHESLESYEINPFINRR | Negative |
| P07507 | EINPFINRRNANSFISPQQR | Negative |
| P07507 | ESHESLESYEINPFINRRNA | Negative |
| P07507 | SYEINPFINRRNANSFISPQ | Negative |
| P07507 | LAALAVAALCYESHESLESY | Negative |
| P07507 | SHESLESYEINPFINRRNAN | Negative |
| P07507 | LLLLSILAALAVAALCYESH | Negative |
| P07507 | LAVAALCYESHESLESYEIN | Negative |
| P07507 | LSILAALAVAALCYESHESL | Negative |
| P07507 | YESHESLESYEINPFINRRN | Negative |
| P07507 | AALCYESHESLESYEINPFI | Negative |
| P07507 | ALAVAALCYESHESLESYEI | Negative |
| P07507 | ALCYESHESLESYEINPFIN | Negative |
| P07507 | VAALCYESHESLESYEINPF | Negative |
| P07528 | GGIGNVAAAQGGPPKSGVFG | Negative |
| P07528 | IGNVAAAQGGPPKSGVFGEN | Negative |
| P07528 | FRKPFVAGLAISLLVGGGIG | Negative |
| P07528 | LAISLLVGGGIGNVAAAQGG | Negative |
| P07528 | GNVAAAQGGPPKSGVFGENE | Negative |
| P07528 | LVGGGIGNVAAAQGGPPKSG | Negative |
| P07528 | AGLAISLLVGGGIGNVAAAQ | Negative |
| P07528 | TLFRKPFVAGLAISLLVGGG | Negative |
| P07528 | GIGNVAAAQGGPPKSGVFGE | Negative |
| P07528 | VAGLAISLLVGGGIGNVAAA | Negative |
| P07528 | AAAQGGPPKSGVFGENEKRN | Negative |
| P07528 | VAAAQGGPPKSGVFGENEKR | Negative |
| P07528 | QGGPPKSGVFGENEKRNDQP | Negative |
| P07528 | ITLFRKPFVAGLAISLLVGG | Negative |

|        |                        |          |
|--------|------------------------|----------|
| P07528 | AAQGGPPKSGVFGENEKRND   | Negative |
| P07528 | GGGIGNVAAAQGGPPKSGVF   | Negative |
| P07528 | FVAGLAISLLVGGGIGNVAA   | Negative |
| P07528 | ISLLVGGGIGNVAAAQGGPP   | Negative |
| P07528 | MITLFRKPFVAGLAISLLVG   | Negative |
| P07528 | AQGGPPKSGVFGENEKRNDQ   | Negative |
| P07528 | GLAISLLVGGGIGNVAAAQG   | Negative |
| P07528 | NVAAAQGGPPKSGVFGENEK   | Negative |
| P07528 | KPFVAGLAISLLVGGGIGNV   | Negative |
| P07528 | LFRKPFVAGLAISLLVGGGI   | Negative |
| P07528 | LLVGGGIGNVAAAQGGPPKS   | Negative |
| P07528 | PFVAGLAISLLVGGGIGNVA   | Negative |
| P07528 | VGGGIGNVAAAQGGPPKSGV   | Negative |
| P07528 | SLLVGGGIGNVAAAQGGPPK   | Negative |
| P07528 | RKPFVAGLAISLLVGGGIGN   | Negative |
| P07529 | KNSLDYLANKAGKRYLGTAV   | Negative |
| P07529 | SSTLLAILSALALTSVQAA    | Negative |
| P07529 | LAILSALALTSVQAAPADKN   | Negative |
| P07529 | ADKNSLDYLANKAGKRYLGT   | Negative |
| P07529 | ALALTSVQAAPADKNSLDYL   | Negative |
| P07529 | SALALTSVQAAPADKNSLDY   | Negative |
| P07529 | AILSALALTSVQAAPADKNS   | Negative |
| P07529 | LALTSVQAAPADKNSLDYLA   | Negative |
| P07529 | DYLANKAGKRYLGTAVQSPQ   | Negative |
| P07529 | TLLAILSALALTSVQAAPAD   | Negative |
| P07529 | MLSSTLLAILSALALTSVQ    | Negative |
| P07529 | SVQAAPADKNSLDYLANKAG   | Negative |
| P07529 | ALTSVQAAPADKNSLDYLAN   | Negative |
| P07529 | LSALALTSVQAAPADKNSLD   | Negative |
| P07529 | ILSALALTSVQAAPADKNSL   | Negative |
| P07529 | VQAAPADKNSLDYLANKAGK   | Negative |
| P07529 | PADKNSLDYLANKAGKRYLG   | Negative |
| P07529 | APADKNSLDYLANKAGKRYL   | Negative |
| P07529 | QAAPADKNSLDYLANKAGKR   | Negative |
| P07529 | STLLAILSALALTSVQAAP    | Negative |
| P07529 | DKNSLDYLANKAGKRYLGTA   | Negative |
| P07529 | NSLDYLANKAGKRYLGTAVQ   | Negative |
| P07529 | TSVQAAPADKNSLDYLANKA   | Negative |
| P07529 | LSSTLLAILSALALTSVQA    | Negative |
| P07529 | LTSVQAAPADKNSLDYLANK   | Negative |
| P07529 | SLDYLANKAGKRYLGTAVQS   | Negative |
| P07529 | AAPADKNSLDYLANKAGKRY   | Negative |
| P07529 | LDYLANKAGKRYLGTAVQSP   | Negative |
| P07529 | TTLLAILSALALTSVQAAPA   | Negative |
| P07596 | PPPVHDTDGHEL RADANY YV | Negative |
| P07596 | SPLFWPAPPSRAADPPP VHD  | Negative |

|        |                       |          |
|--------|-----------------------|----------|
| P07596 | SRRAGSSSSPLFWPAPPSRA  | Negative |
| P07596 | RAADPPPVHDTDGHELRA DA | Negative |
| P07596 | RAGSSSSPLFWPAPPSRAAD  | Negative |
| P07596 | PAPPSRAADPPPVHDTDGHE  | Negative |
| P07596 | RRAGSSSSPLFWPAPPSRAA  | Negative |
| P07596 | DTDGHELRADANYYYVLSANR | Negative |
| P07596 | MGSRRAGSSSSPLFWPAPPS  | Negative |
| P07596 | LFWPAPPSRAADPPPVHDTD  | Negative |
| P07596 | ADPPPVHDTDGHELRADANY  | Negative |
| P07596 | SSPLFWPAPPSRAADPPPVH  | Negative |
| P07596 | PSRAADPPPVHDTDGHELRA  | Negative |
| P07596 | SRAADPPPVHDTDGHELRAD  | Negative |
| P07596 | PLFWPAPPSRAADPPPVHDT  | Negative |
| P07596 | AGSSSSPLFWPAPPSRAADP  | Negative |
| P07596 | WPAPPSRAADPPPVHDTDGH  | Negative |
| P07596 | HDTDGHELRADANYYYVLSAN | Negative |
| P07596 | SSSPLFWPAPPSRAADPPPV  | Negative |
| P07596 | PPVHDTDGHELRADANYYYVL | Negative |
| P07596 | FWPAPPSRAADPPPVHDTDG  | Negative |
| P07596 | APPSRAADPPPVHDTDGHEL  | Negative |
| P07596 | VHDTDGHELRADANYYYVLSA | Negative |
| P07596 | AADPPPVHDTDGHELRADAN  | Negative |
| P07596 | DPPPVHDTDGHELRADANY   | Negative |
| P07596 | GSRRAGSSSSPLFWPAPPSR  | Negative |
| P07596 | PPSRAADPPPVHDTDGHEL   | Negative |
| P07596 | PVHDTDGHELRADANYYYVLS | Negative |
| P07596 | GSSSSPLFWPAPPSRAADPP  | Negative |
| P07597 | VALNCGQVDSKMKPCLTYVQ  | Negative |
| P07597 | LMAAALVLMLTAAPRAAVAL  | Negative |
| P07597 | LNCGQVDSKMKPCLTYVQGG  | Negative |
| P07597 | TAAPRAAVALNCGQVDSKMK  | Negative |
| P07597 | VLLMAAALVLMLTAAPRAAV  | Negative |
| P07597 | APRAAVALNCGQVDSKMKPC  | Negative |
| P07597 | AQVLLMAAALVLMLTAAPRA  | Negative |
| P07597 | LLMAAALVLMLTAAPRAAVA  | Negative |
| P07597 | LTAAPRAAVALNCGQVDSKM  | Negative |
| P07597 | AALVLMLTAAPRAAVALNCG  | Negative |
| P07597 | ARAQVLLMAAALVLMLTAAP  | Negative |
| P07597 | RAQVLLMAAALVLMLTAAPR  | Negative |
| P07597 | RAAVALNCGQVDSKMKPCLT  | Negative |
| P07597 | CGQVDSKMKPCLTYVQGGPG  | Negative |
| P07597 | MAAALVLMLTAAPRAAVALN  | Negative |
| P07597 | LMMLTAAPRAAVALNCGQVDS | Negative |
| P07597 | AAALVLMLTAAPRAAVALNC  | Negative |
| P07597 | NCGQVDSKMKPCLTYVQGGP  | Negative |
| P07597 | MARAQVLLMAAALVLMLTAA  | Negative |



|        |                      |          |
|--------|----------------------|----------|
| P07597 | AAVALNCGQVDSKMKPCLTY | Negative |
| P07597 | PRAAVALNCGQVDSKMKPCL | Negative |
| P07597 | LVLMLTAAPRAAVALNCGQV | Negative |
| P07597 | GQVDSKMKPCLTYVQGGPGP | Negative |
| P07597 | AVALNCGQVDSKMKPCLTYV | Negative |
| P07597 | VLMLTAAPRAAVALNCGQVD | Negative |
| P07597 | MLTAAPRAAVALNCGQVDSK | Negative |
| P07597 | QVLLMAAALVLMLTAAPRAA | Negative |
| P07597 | AAPRAAVALNCGQVDSKMKP | Negative |
| P07597 | ALNCGQVDSKMKPCLTYVQG | Negative |
| P07602 | SAVWCQNVKTASDCGAVKHC | Negative |
| P07602 | LLGAALAGPVLGLKECTRGS | Negative |
| P07602 | GPVLGLKECTRGSVWCQNV  | Negative |
| P07602 | GSAVWCQNVKTASDCGAVKH | Negative |
| P07602 | AGPVLGLKECTRGSVWCQN  | Negative |
| P07602 | FLLASLLGAALAGPVLGLKE | Negative |
| P07602 | RGSVWCQNVKTASDCGAVK  | Negative |
| P07602 | AALAGPVLGLKECTRGSVW  | Negative |
| P07602 | ALAGPVLGLKECTRGSVWC  | Negative |
| P07602 | TRGSVWCQNVKTASDCGAV  | Negative |
| P07602 | AVWCQNVKTASDCGAVKHCL | Negative |
| P07602 | LFLLASLLGAALAGPVLGLK | Negative |
| P07602 | LLASLLGAALAGPVLGLKEC | Negative |
| P07602 | ALFLLASLLGAALAGPVLGL | Negative |
| P07602 | ECTRGSVWCQNVKTASDCG  | Negative |
| P07602 | GAALAGPVLGLKECTRGSV  | Negative |
| P07602 | LAGPVLGLKECTRGSVWCQ  | Negative |
| P07602 | MYALFLLASLLGAALAGPVL | Negative |
| P07602 | GLKECTRGSVWCQNVKTAS  | Negative |
| P07602 | KECTRGSVWCQNVKTASDC  | Negative |
| P07602 | LKECTRGSVWCQNVKTASD  | Negative |
| P07602 | SLLGAALAGPVLGLKECTRG | Negative |
| P07602 | VLGLKECTRGSVWCQNVKT  | Negative |
| P07602 | LGAALAGPVLGLKECTRGS  | Negative |
| P07602 | CTRGSVWCQNVKTASDCGA  | Negative |
| P07602 | ASLLGAALAGPVLGLKECTR | Negative |
| P07602 | LASLLGAALAGPVLGLKECT | Negative |
| P07602 | LGLKECTRGSVWCQNVKTA  | Negative |
| P07602 | PVLGLKECTRGSVWCQNVK  | Negative |
| P07625 | VFAEGDIEAGEKAFNKCKSC | Negative |
| P07625 | TRTLAVVLAMTFSAAPVFAE | Negative |
| P07625 | AMTFSAAPVFAEGDIEAGEK | Negative |
| P07625 | AEGDIEAGEKAFNKCKSCHQ | Negative |
| P07625 | AFNKCKSCHQIVSDAGEEIV | Negative |
| P07625 | GDIEAGEKAFNKCKSCHQIV | Negative |
| P07625 | FSAAPVFAEGDIEAGEKAFN | Negative |

|        |                      |          |
|--------|----------------------|----------|
| P07625 | VLAMTFSAAPVFAEGDIEAG | Negative |
| P07625 | IEAGEKAFNKCKSCHQIVSD | Negative |
| P07625 | RTLAVVLAMTFSAAPVFAEG | Negative |
| P07625 | TFSAAPVFAEGDIEAGEKAF | Negative |
| P07625 | LAVVLAMTFSAAPVFAEGDI | Negative |
| P07625 | TLAVVLAMTFSAAPVFAEGD | Negative |
| P07625 | DIEAGEKAFNKCKSCHQIVS | Negative |
| P07625 | LAMTFSAAPVFAEGDIEAGE | Negative |
| P07625 | GEKAFNKCKSCHQIVSDAGE | Negative |
| P07625 | MTFSAAPVFAEGDIEAGEKA | Negative |
| P07625 | PVFAEGDIEAGEKAFNKCKS | Negative |
| P07625 | AAPVFAEGDIEAGEKAFNKC | Negative |
| P07625 | KAFNKCKSCHQIVSDAGEEI | Negative |
| P07625 | SAAPVFAEGDIEAGEKAFNK | Negative |
| P07625 | EGDIEAGEKAFNKCKSCHQI | Negative |
| P07625 | EKAFNKCKSCHQIVSDAGEE | Negative |
| P07625 | MTRTLAVVLAMTFSAAPVFA | Negative |
| P07625 | APVFAEGDIEAGEKAFNKCK | Negative |
| P07625 | EAGEKAFNKCKSCHQIVSDA | Negative |
| P07625 | FAEGDIEAGEKAFNKCKSCH | Negative |
| P07625 | AGEKAFNKCKSCHQIVSDAG | Negative |
| P07625 | VVLAMTFSAAPVFAEGDIEA | Negative |
| P07634 | GAGLASELPGIQELLDRLRD | Negative |
| P07634 | LPRVLLLLFLHLLLGCGRSH | Negative |
| P07634 | LLLGCRSHPLGGAGLASEL  | Negative |
| P07634 | VLLLLFLHLLLGCGRSHPLG | Negative |
| P07634 | LLGCRSHPLGGAGLASELPG | Negative |
| P07634 | HPLGGAGLASELPGIQELLD | Negative |
| P07634 | RSHPLGGAGLASELPGIQEL | Negative |
| P07634 | RVLLLLFLHLLLGCGRSHPL | Negative |
| P07634 | MALPRVLLLLFLHLLLGCGR | Negative |
| P07634 | LFLHLLLGCGRSHPLGGAGL | Negative |
| P07634 | LLFLHLLLGCGRSHPLGGA  | Negative |
| P07634 | PRMALPRVLLLLFLHLLLGL | Negative |
| P07634 | HLLLGCGRSHPLGGAGLASE | Negative |
| P07634 | MGPRMALPRVLLLLFLHLLL | Negative |
| P07634 | PLGGAGLASELPGIQELLD  | Negative |
| P07634 | PRVLLLLFLHLLLGCGRSH  | Negative |
| P07634 | GGAGLASELPGIQELLDRLR | Negative |
| P07634 | GCRSHPLGGAGLASELPGIQ | Negative |
| P07634 | CRSHPLGGAGLASELPGIQE | Negative |
| P07634 | LGCRSHPLGGAGLASELPGI | Negative |
| P07634 | RMALPRVLLLLFLHLLLGC  | Negative |
| P07634 | LLFLHLLLGCGRSHPLGGAG | Negative |
| P07634 | LLGCRSHPLGGAGLASELP  | Negative |
| P07634 | SHPLGGAGLASELPGIQELL | Negative |

|        |                       |          |
|--------|-----------------------|----------|
| P07634 | LGGAGLASELPGIQELLDRL  | Negative |
| P07634 | ALPRVLLLLFLHLLLLGCRS  | Negative |
| P07634 | LHLLLLGCRSHPLGGAGLAS  | Negative |
| P07634 | GPRMALPRVLLLLFLHLLLL  | Negative |
| P07634 | FLHLLLLGCRSHPLGGAGLA  | Negative |
| P07662 | RAASALVMATVIGLAPAVAF  | Negative |
| P07662 | PAVAFALAEPTSTPQAPIAA  | Negative |
| P07662 | ALAEPTSTPQAPIAAYKPRS  | Negative |
| P07662 | RVLHRAASALVMATVIGLAP  | Negative |
| P07662 | LVMATVIGLAPAVAFALAEPT | Negative |
| P07662 | LAPAVAFALAEPTSTPQAPI  | Negative |
| P07662 | SALVMATVIGLAPAVAFALA  | Negative |
| P07662 | VAFALAEPTSTPQAPIAAYK  | Negative |
| P07662 | AEPTSTPQAPIAAYKPRSNE  | Negative |
| P07662 | IGLAPAVAFALAEPTSTPQA  | Negative |
| P07662 | AVAFALAEPTSTPQAPIAAY  | Negative |
| P07662 | LAEPTSTPQAPIAAYKPRSN  | Negative |
| P07662 | VIGLAPAVAFALAEPTSTPQ  | Negative |
| P07662 | AASALVMATVIGLAPAVAFAL | Negative |
| P07662 | MATVIGLAPAVAFALAEPTS  | Negative |
| P07662 | APAVAFALAEPTSTPQAPIA  | Negative |
| P07662 | MLRVLHRAASALVMATVIGL  | Negative |
| P07662 | AFALAEPTSTPQAPIAAYKP  | Negative |
| P07662 | ASALVMATVIGLAPAVAFAL  | Negative |
| P07662 | ALVMATVIGLAPAVAFALAE  | Negative |
| P07662 | VMATVIGLAPAVAFALAEPT  | Negative |
| P07662 | GLAPAVAFALAEPTSTPQAP  | Negative |
| P07662 | LHRAASALVMATVIGLAPAV  | Negative |
| P07662 | TVIGLAPAVAFALAEPTSTP  | Negative |
| P07662 | VLHRAASALVMATVIGLAPA  | Negative |
| P07662 | EPTSTPQAPIAAYKPRSNEI  | Negative |
| P07662 | HRAASALVMATVIGLAPAVA  | Negative |
| P07662 | FALAEPTSTPQAPIAAYKPR  | Negative |
| P07662 | LRVLHRAASALVMATVIGLA  | Negative |
| P07692 | DDSELLVNTKSGKVMRTRIP  | Negative |
| P07692 | VVLCQADDDSELLVNTKSGK  | Negative |
| P07692 | VLCQADDDSELLVNTKSGKV  | Negative |
| P07692 | CQADDDSELLVNTKSGKVMR  | Negative |
| P07692 | ADDDSELLVNTKSGKVMRTR  | Negative |
| P07692 | HLVVLCQADDDSELLVNTKS  | Negative |
| P07692 | MNLLVTSSLGVLLHLVVLCQ  | Negative |
| P07692 | SELLVNTKSGKVMRTRIPVL  | Negative |
| P07692 | QADDDSELLVNTKSGKVMRT  | Negative |
| P07692 | LGVLLHLVVLCQADDDSELL  | Negative |
| P07692 | VLLHLVVLCQADDDSELLVN  | Negative |
| P07692 | LLVTSSLGVLLHLVVLCQAD  | Negative |

|        |                       |          |
|--------|-----------------------|----------|
| P07692 | TSSLGVLLHLVVLCQADDD   | Negative |
| P07692 | NLLVTSSLGVLLHLVVLCQA  | Negative |
| P07692 | LLHLVVLCQADDDSELLVNT  | Negative |
| P07692 | LVVLCQADDDSELLVNTKSG  | Negative |
| P07692 | LHLVVLCQADDDSELLVNTK  | Negative |
| P07692 | LVTSSLGVLLHLVVLCQADD  | Negative |
| P07692 | VTSSLGVLLHLVVLCQADDD  | Negative |
| P07692 | ELLVNTKSGKVMRTRIPVLS  | Negative |
| P07692 | MREMNLLVTSSLGVLLHLVV  | Negative |
| P07692 | DSELLVNTKSGKVMRTRIPV  | Negative |
| P07692 | SLGVLLHLVVLCQADDDSEL  | Negative |
| P07692 | REMNLLVTSSLGVLLHLVVL  | Negative |
| P07692 | LCQADDDSELLVNTKSGKVM  | Negative |
| P07692 | LLVNTKSGKVMRTRIPVLSS  | Negative |
| P07692 | EMNLLVTSSLGVLLHLVVLC  | Negative |
| P07692 | GVLLHLVVLCQADDDSELLV  | Negative |
| P07692 | DDDSELLVNTKSGKVMRTRI  | Negative |
| P07712 | VLLVCLAYVMAAILSLCASA  | Negative |
| P07712 | MKTAVLLVCLAYVMAAILSL  | Negative |
| P07712 | TAVLLVCLAYVMAAILSLCA  | Negative |
| P07712 | YVMAAILSLCASAPSWRPQG  | Negative |
| P07712 | ASAPSWRPQGRFGKRTIPDR  | Negative |
| P07712 | LLVCLAYVMAAILSLCASAP  | Negative |
| P07712 | AILSLCASAPSWRPQGRFGK  | Negative |
| P07712 | LCASAPSWRPQGRFGKRTIP  | Negative |
| P07712 | SLCASAPSWRPQGRFGKRTI  | Negative |
| P07712 | AVLLVCLAYVMAAILSLCAS  | Negative |
| P07712 | QGRFGKRTIPDRLPQTESS   | Negative |
| P07712 | VMAAILSLCASAPSWRPQGR  | Negative |
| P07712 | AYVMAAILSLCASAPSWRPQ  | Negative |
| P07712 | ILSLCASAPSWRPQGRFGKR  | Negative |
| P07712 | SWRPQGRFGKRTIPDRLPQT  | Negative |
| P07712 | PQGRFGKRTIPDRLPQTEES  | Negative |
| P07712 | WRPQGRFGKRTIPDRLPQTE  | Negative |
| P07712 | VCLAYVMAAILSLCASAPSW  | Negative |
| P07712 | SAPSWRPQGRFGKRTIPDRL  | Negative |
| P07712 | APSWRPQGRFGKRTIPDRLP  | Negative |
| P07712 | CASAPSWRPQGRFGKRTIPD  | Negative |
| P07712 | KTAVLLVCLAYVMAAILSLC  | Negative |
| P07712 | PSWRPQGRFGKRTIPDRLPQ  | Negative |
| P07712 | LVCLAYVMAAILSLCASAPS  | Negative |
| P07712 | AAAILSLCASAPSWRPQGRFG | Negative |
| P07712 | LAYVMAAILSLCASAPSWRP  | Negative |
| P07712 | MAAILSLCASAPSWRPQGRF  | Negative |
| P07712 | RPQGRFGKRTIPDRLPQTEE  | Negative |
| P07712 | LSLCASAPSWRPQGRFGKRT  | Negative |

|        |                      |          |
|--------|----------------------|----------|
| P07728 | MASINRPIVFFTVCLFLLCN | Negative |
| P07728 | LAQQLLGQSTSQWQSSRRGS | Negative |
| P07728 | NRPIVFFTVCLFLLCNGSLA | Negative |
| P07728 | NGSLAQQLLGQSTSQWQSSR | Negative |
| P07728 | FTVCLFLLCNGSLAQQLLGQ | Negative |
| P07728 | CNGSLAQQLLGQSTSQWQSS | Negative |
| P07728 | LFLLCNGSLAQQLLGQSTSQ | Negative |
| P07728 | QQLLGQSTSQWQSSRRGSPR | Negative |
| P07728 | FLLCNGSLAQQLLGQSTSQW | Negative |
| P07728 | GQSTSQWQSSRRGSPRECRF | Negative |
| P07728 | VFFTVCLFLLCNGSLAQQLL | Negative |
| P07728 | IVFFTVCLFLLCNGSLAQQL | Negative |
| P07728 | RPIVFFTVCLFLLCNGSLAQ | Negative |
| P07728 | QSTSQWQSSRRGSPRECRFD | Negative |
| P07728 | INRPIVFFTVCLFLLCNGSL | Negative |
| P07728 | CLFLLCNGSLAQQLLGQSTS | Negative |
| P07728 | VCLFLLCNGSLAQQLLGQST | Negative |
| P07728 | LCNGSLAQQLLGQSTSQWQS | Negative |
| P07728 | AQQLLGQSTSQWQSSRRGSP | Negative |
| P07728 | QLLGQSTSQWQSSRRGSPRE | Negative |
| P07728 | PIVFFTVCLFLLCNGSLAQQ | Negative |
| P07728 | SINRPIVFFTVCLFLLCNGS | Negative |
| P07728 | ASINRPIVFFTVCLFLLCNG | Negative |
| P07728 | TVCLFLLCNGSLAQQLLGQS | Negative |
| P07728 | GSLAQQLLGQSTSQWQSSRR | Negative |
| P07728 | SLAQQLLGQSTSQWQSSRRG | Negative |
| P07728 | LLGQSTSQWQSSRRGSPREC | Negative |
| P07728 | LGQSTSQWQSSRRGSPRECR | Negative |
| P07728 | LLCNGSLAQQLLGQSTSQWQ | Negative |
| P07730 | LCDGSLAQQLLGQSTSQWQS | Negative |
| P07730 | LGQSTSQWQSSRRGSPRGCR | Negative |
| P07730 | LLGQSTSQWQSSRRGSPRGC | Negative |
| P07730 | CLFLLCDGSLAQQLLGQSTS | Negative |
| P07730 | QLLGQSTSQWQSSRRGSPRG | Negative |
| P07730 | SINRPIVFFTVCLFLLCDGS | Negative |
| P07730 | LFLLCDGSLAQQLLGQSTSQ | Negative |
| P07730 | DGSLAQQLLGQSTSQWQSSR | Negative |
| P07730 | FTVCLFLLCDGSLAQQLLGQ | Negative |
| P07730 | IVFFTVCLFLLCDGSLAQQL | Negative |
| P07730 | SLAQQLLGQSTSQWQSSRRG | Negative |
| P07730 | INRPIVFFTVCLFLLCDGSL | Negative |
| P07730 | LLCDGSLAQQLLGQSTSQWQ | Negative |
| P07730 | ASINRPIVFFTVCLFLLCDG | Negative |
| P07730 | CDGSLAQQLLGQSTSQWQSS | Negative |
| P07730 | VFFTVCLFLLCDGSLAQQLL | Negative |
| P07730 | VCLFLLCDGSLAQQLLGQST | Negative |

|        |                       |          |
|--------|-----------------------|----------|
| P07730 | MASINRPIVFFTVCLFLLCD  | Negative |
| P07730 | QSTSQWQSSRRGSPRGCRFD  | Negative |
| P07730 | LAQQLLGQSTSQWQSSRRGS  | Negative |
| P07730 | PIVFFTVCLFLLCDGSLAQQ  | Negative |
| P07730 | GQSTSQWQSSRRGSPRGCRF  | Negative |
| P07730 | RPIVFFTVCLFLLCDGSLAQ  | Negative |
| P07730 | TVCLFLLCDGSLAQQLLGQS  | Negative |
| P07730 | FLLCDGSLAQQLLGQSTSQW  | Negative |
| P07730 | GSLAQQLLGQSTSQWQSSRR  | Negative |
| P07730 | QQLLGQSTSQWQSSRRGSPR  | Negative |
| P07730 | AQQLLGQSTSQWQSSRRGSP  | Negative |
| P07730 | NRPIVFFTVCLFLLCDGSLA  | Negative |
| P07759 | ILMAGICPAVLCFPDGTKEM  | Negative |
| P07759 | VLCFPDGTKEMDIVFHEHQD  | Negative |
| P07759 | CFPDGTKEMDIVFHEHQDNG  | Negative |
| P07759 | PDGTKEMDIVFHEHQDNGTQ  | Negative |
| P07759 | FPDGTKEMDIVFHEHQDNGT  | Negative |
| P07759 | GICPAVLCFPDGTKEMDIVF  | Negative |
| P07759 | MDIVFHEHQDNGTQDDSLTL  | Negative |
| P07759 | GMILMAGICPAVLCFPDGTK  | Negative |
| P07759 | EMDIVFHEHQDNGTQDDSLT  | Negative |
| P07759 | CPAVLCFPDGTKEMDIVFHE  | Negative |
| P07759 | FIVAMGMILMAGICPAVLCF  | Negative |
| P07759 | TKEMDIVFHEHQDNGTQDDDS | Negative |
| P07759 | AGICPAVLCFPDGTKEMDIV  | Negative |
| P07759 | IVAMGMILMAGICPAVLCFP  | Negative |
| P07759 | MAFIVAMGMILMAGICPAVL  | Negative |
| P07759 | MAGICPAVLCFPDGTKEMDI  | Negative |
| P07759 | KEMDIVFHEHQDNGTQDDSL  | Negative |
| P07759 | VAMGMILMAGICPAVLCFPD  | Negative |
| P07759 | MILMAGICPAVLCFPDGTKE  | Negative |
| P07759 | DIVFHEHQDNGTQDDSLTLA  | Negative |
| P07759 | DGTKEMDIVFHEHQDNGTQD  | Negative |
| P07759 | AFIVAMGMILMAGICPAVLC  | Negative |
| P07759 | LCFPDGTKEMDIVFHEHQDN  | Negative |
| P07759 | AMGMILMAGICPAVLCFPDG  | Negative |
| P07759 | LMAGICPAVLCFPDGTKEMD  | Negative |
| P07759 | AVLCFPDGTKEMDIVFHEHQ  | Negative |
| P07759 | PAVLCFPDGTKEMDIVFHEH  | Negative |
| P07759 | ICPAVLCFPDGTKEMDIVFH  | Negative |
| P07759 | GTKEMDIVFHEHQDNGTQDD  | Negative |
| P07767 | ISLGALAVASSLFTWDNKAD  | Negative |
| P07767 | TKDYSKESRVNEKSCKKGATV | Negative |
| P07767 | DAIVTKDYSKESRVNEKSCK  | Negative |
| P07767 | SSLFTWDNKADAIVTKDYSK  | Negative |
| P07767 | KADAIVTKDYSKESRVNEKS  | Negative |

|        |                       |          |
|--------|-----------------------|----------|
| P07767 | SLGALAVASSLFTWDNKADA  | Negative |
| P07767 | FTWDNKADAIVTKDYSKESR  | Negative |
| P07767 | KKQIISLGALAVASSLFTWD  | Negative |
| P07767 | TWDNKADAIVTKDYSKESRV  | Negative |
| P07767 | DNKADAIVTKDYSKESRVNE  | Negative |
| P07767 | VTKDYSKESRVNEKSCKKGAT | Negative |
| P07767 | QIISLGALAVASSLFTWDNK  | Negative |
| P07767 | IISLGALAVASSLFTWDNKA  | Negative |
| P07767 | MKKQIISLGALAVASSLFTW  | Negative |
| P07767 | LGALAVASSLFTWDNKADAI  | Negative |
| P07767 | IVTKDYSKESRVNEKSCKKGA | Negative |
| P07767 | WDNKADAIVTKDYSKESRVN  | Negative |
| P07767 | ADAIVTKDYSKESRVNEKSK  | Negative |
| P07767 | LFTWDNKADAIVTKDYSKES  | Negative |
| P07767 | ASSLFTWDNKADAIVTKDYS  | Negative |
| P07767 | LAVASSLFTWDNKADAIVTK  | Negative |
| P07767 | SLFTWDNKADAIVTKDYSKE  | Negative |
| P07767 | NKADAIVTKDYSKESRVNEK  | Negative |
| P07767 | GALAVASSLFTWDNKADAIV  | Negative |
| P07767 | AIVTKDYSKESRVNEKSCKG  | Negative |
| P07767 | KDYSKESRVNEKSCKKGATVS | Negative |
| P07767 | KQIISLGALAVASSLFTWDN  | Negative |
| P07767 | VASSLFTWDNKADAIVTKDY  | Negative |
| P07767 | ALAVASSLFTWDNKADAIVT  | Negative |
| P07808 | GLTLALSLLVCLGILAEQYP  | Negative |
| P07808 | MGLCGLTLALSLLVCLGILA  | Negative |
| P07808 | MMLGNKRMGLCGLTLALSLL  | Negative |
| P07808 | GNKRMGLCGLTLALSLLVCL  | Negative |
| P07808 | EGYPSKPDNPGEDAPAEDMA  | Negative |
| P07808 | YPSKPDNPGEDAPAEDMARY  | Negative |
| P07808 | CGLTLALSLLVCLGILAEQY  | Negative |
| P07808 | LCGLTLALSLLVCLGILAEQ  | Negative |
| P07808 | GYPSKPDNPGEDAPAEDMAR  | Negative |
| P07808 | SLLVCLGILAEQYPSKPDNP  | Negative |
| P07808 | ALSLLVCLGILAEQYPSKPD  | Negative |
| P07808 | CLGILAEQYPSKPDNPGEDA  | Negative |
| P07808 | LVCLGILAEQYPSKPDNPGE  | Negative |
| P07808 | MLGNKRMGLCGLTLALSLLV  | Negative |
| P07808 | VCLGILAEQYPSKPDNPGED  | Negative |
| P07808 | TLALSLLVCLGILAEQYPSK  | Negative |
| P07808 | LTLALSLLVCLGILAEQYPS  | Negative |
| P07808 | RMGLCGLTLALSLLVCLGIL  | Negative |
| P07808 | LGILAEQYPSKPDNPGEDAP  | Negative |
| P07808 | LGNKRMGLCGLTLALSLLVC  | Negative |
| P07808 | KRMGLCGLTLALSLLVCLGI  | Negative |
| P07808 | LLVCLGILAEQYPSKPDNPG  | Negative |

|        |                       |          |
|--------|-----------------------|----------|
| P07808 | GILAEGYPSKPDNPGEDAPA  | Negative |
| P07808 | AEGYPSKPDNPGEDAPAEDM  | Negative |
| P07808 | GLCGLTLALSLLVCLGILAE  | Negative |
| P07808 | LSLLVCLGILAEGYPSKPDN  | Negative |
| P07808 | NKRMGLCGLTLALSLLVCLG  | Negative |
| P07808 | ILAEGYPSKPDNPGEDAPAE  | Negative |
| P07808 | LAEGYPSKPDNPGEDAPAED  | Negative |
| P07897 | VPDHDNSLSVSIPQPSPLKA  | Negative |
| P07897 | IAAVISEEVPDHDNSLSVSI  | Negative |
| P07897 | LVFVTLRVIAAVISEEVPDH  | Negative |
| P07897 | SEEVDPDHDNSLSVSIPQSP  | Negative |
| P07897 | HDNSLSVSIPQPSPLKALLG  | Negative |
| P07897 | AAVISEEVPDHDNSLSVSIP  | Negative |
| P07897 | PDHDNSLSVSIPQPSPLKAL  | Negative |
| P07897 | AVISEEVPDHDNSLSVSIPQ  | Negative |
| P07897 | DHDNSLSVSIPQPSPLKALL  | Negative |
| P07897 | SLSVSIPQPSPLKALLGTSL  | Negative |
| P07897 | TTLLLVFVTLRVIAAVISEE  | Negative |
| P07897 | VFVTLRVIAAVISEEVPDHD  | Negative |
| P07897 | RVIAAVISEEVPDHDNSLSV  | Negative |
| P07897 | FVTLRVIAAVISEEVPDHDN  | Negative |
| P07897 | TLRVIAAVISEEVPDHDNSL  | Negative |
| P07897 | EEVPDHDNSLSVSIPQPSPL  | Negative |
| P07897 | DNSLSVSIPQPSPLKALLGT  | Negative |
| P07897 | VIAAVISEEVPDHDNSLSVS  | Negative |
| P07897 | MTLLLVFVTLRVIAAVISE   | Negative |
| P07897 | TLLLVFVTLRVIAAVISEEV  | Negative |
| P07897 | WISEEVPDHDNSLSVSIPQP  | Negative |
| P07897 | LLLVFVTLRVIAAVISEEVP  | Negative |
| P07897 | SVSIPQPSPLKALLGTSLTI  | Negative |
| P07897 | VTLRVIAAVISEEVPDHDNS  | Negative |
| P07897 | EVPDHDNSLSVSIPQPSPLK  | Negative |
| P07897 | NSLSVSIPQPSPLKALLGTS  | Negative |
| P07897 | LRVIAAVISEEVPDHDNSLS  | Negative |
| P07897 | LSVSIPQPSPLKALLGTSLT  | Negative |
| P07897 | ISEEVPDHDNSLSVSIPQPS  | Negative |
| P07982 | GGAVAQQT VWGQCGGIGWSG | Negative |
| P07982 | LYGGAVAQQT VWGQCGGIGW | Negative |
| P07982 | SILYGGAVAQQT VWGQCGGI | Negative |
| P07982 | QTVWGQCGGIGWSGPTNCAP  | Negative |
| P07982 | LLLAASILYGGAVAQQT VWG | Negative |
| P07982 | SVAPLLLAASILYGGAVAQQ  | Negative |
| P07982 | NKSVAPLLLAASILYGGAVA  | Negative |
| P07982 | LAASILYGGAVAQQT VWGQC | Negative |
| P07982 | QCGGIGWSGPTNCAPGSACS  | Negative |
| P07982 | KSVAPLLLAASILYGGAVAQ  | Negative |



|        |                      |          |
|--------|----------------------|----------|
| P07982 | VAQQTVWGQCGGIGWSGPTN | Negative |
| P07982 | AASILYGGAVAQQTVWGQCG | Negative |
| P07982 | ASILYGGAVAQQTVWGQCGG | Negative |
| P07982 | LLAASILYGGAVAQQTVWGQ | Negative |
| P07982 | APLLLAASILYGGAVAQQTV | Negative |
| P07982 | MNKSVAPLLLAASILYGGAV | Negative |
| P07982 | TVWGQCGGIGWSGPTNCAPG | Negative |
| P07982 | VAPLLLAASILYGGAVAQQT | Negative |
| P07982 | YGGAVAQQTVWGQCGGIGWS | Negative |
| P07982 | GQCGGIGWSGPTNCAPGSAC | Negative |
| P07982 | ILYGGAVAQQTVWGQCGGIG | Negative |
| P07982 | QQTVWGQCGGIGWSGPTNCA | Negative |
| P07982 | GAVAQQTVWGQCGGIGWSGP | Negative |
| P07982 | WGQCGGIGWSGPTNCAPGSA | Negative |
| P07982 | VWGQCGGIGWSGPTNCAPGS | Negative |
| P07982 | CGGIGWSGPTNCAPGSACST | Negative |
| P07982 | AQQTVWGQCGGIGWSGPTNC | Negative |
| P07982 | AVAQQTVWGQCGGIGWSGPT | Negative |
| P07982 | GGIGWSGPTNCAPGSACSTL | Negative |
| P07987 | ACSSVWGQCGGQNWSGPTCC | Negative |
| P07987 | ASVPLEERQACSSVWGQCGG | Negative |
| P07987 | LAASVPLEERQACSSVWGQC | Negative |
| P07987 | TLATLATLAASVPLEERQAC | Negative |
| P07987 | VPLEERQACSSVWGQCGGQN | Negative |
| P07987 | SSVWGQCGGQNWSGPTCCAS | Negative |
| P07987 | TTLATLATLAASVPLEERQA | Negative |
| P07987 | LTTLATLATLAASVPLEERQ | Negative |
| P07987 | CSSVWGQCGGQNWSGPTCCA | Negative |
| P07987 | QACSSVWGQCGGQNWSGPTC | Negative |
| P07987 | SVPLEERQACSSVWGQCGGQ | Negative |
| P07987 | AASVPLEERQACSSVWGQCG | Negative |
| P07987 | EERQACSSVWGQCGGQNWSG | Negative |
| P07987 | TLATLAASVPLEERQACSSV | Negative |
| P07987 | VGILTTLATLATLAASVPLE | Negative |
| P07987 | VWGQCGGQNWSGPTCCASGS | Negative |
| P07987 | TLAASVPLEERQACSSVWGQ | Negative |
| P07987 | PLEERQACSSVWGQCGGQNW | Negative |
| P07987 | IVGILTTLATLATLAASVPL | Negative |
| P07987 | GILTTLATLATLAASVPLEE | Negative |
| P07987 | SVWGQCGGQNWSGPTCCASG | Negative |
| P07987 | LATLATLAASVPLEERQACS | Negative |
| P07987 | MIVGILTTLATLATLAASVP | Negative |
| P07987 | ATLAASVPLEERQACSSVWG | Negative |
| P07987 | LATLAASVPLEERQACSSVW | Negative |
| P07987 | LEERQACSSVWGQCGGQNWS | Negative |
| P07987 | ILTTLATLATLAASVPLEER | Negative |

|        |                       |          |
|--------|-----------------------|----------|
| P07987 | RQACSSVWGQCGGQNWSGPT  | Negative |
| P07987 | ERQACSSVWGQCGGQNWSGP  | Negative |
| P07994 | QGGHGCHGLELDRELVLAKV  | Negative |
| P07994 | QLLLLLLAPQGGHGCHGLEL  | Negative |
| P07994 | HGLELDRELVLAKVRALFLD  | Negative |
| P07994 | APQGGHGCHGLELDRELVLA  | Negative |
| P07994 | LAPQGGHGCHGLELDRELVL  | Negative |
| P07994 | GLELDRELVLAKVRALFLDA  | Negative |
| P07994 | LLAPQGGHGCHGLELDRELV  | Negative |
| P07994 | LDRELVLAKVRALFLDALGP  | Negative |
| P07994 | LLLLAPQGGHGCHGLELDRE  | Negative |
| P07994 | LLLLLLAPQGGHGCHGLELD  | Negative |
| P07994 | DRELVLAKVRALFLDALGPP  | Negative |
| P07994 | ELVLAKVRALFLDALGPPPV  | Negative |
| P07994 | LAKVRALFLDALGPPPVTE   | Negative |
| P07994 | ELDRELVLAKVRALFLDALG  | Negative |
| P07994 | CHGLELDRELVLAKVRALFL  | Negative |
| P07994 | LLLLLAPQGGHGCHGLELDR  | Negative |
| P07994 | RELVLAKVRALFLDALGPPP  | Negative |
| P07994 | GHGCHGLELDRELVLAKVRA  | Negative |
| P07994 | WLQLLLLLLAPQGGHGCHGL  | Negative |
| P07994 | LVLAKVRALFLDALGPPPV   | Negative |
| P07994 | PQGGHGCHGLELDRELVLAK  | Negative |
| P07994 | LLAPQGGHGCHGLELDREL   | Negative |
| P07994 | LELDRELVLAKVRALFLDAL  | Negative |
| P07994 | MWLQLLLLLLAPQGGHGCHG  | Negative |
| P07994 | HGCHGLELDRELVLAKVRAL  | Negative |
| P07994 | AKVRALFLDALGPPPVTEG   | Negative |
| P07994 | GCHGCHGLELDRELVLAKVR  | Negative |
| P07994 | VLAKVRALFLDALGPPPV    | Negative |
| P07994 | GCHGLELDRELVLAKVRALF  | Negative |
| P07998 | RLLLLVLILLVLGWVQPSLG  | Negative |
| P07998 | LLVLGWVQPSLGKESRAKKF  | Negative |
| P07998 | ILLVLGWVQPSLGKESRAKK  | Negative |
| P07998 | LVRLLLLVLILLVLGWVQPS  | Negative |
| P07998 | LVLILLVLGWVQPSLGKESR  | Negative |
| P07998 | LILLVLGWVQPSLGKESRAK  | Negative |
| P07998 | SLGKESRAKKFQRQHMDSDS  | Negative |
| P07998 | GWVQPSLGKESRAKKFQRQH  | Negative |
| P07998 | LLLVLILLVLGWVQPSLGK   | Negative |
| P07998 | GKESRAKKFQRQHMDSDSSP  | Negative |
| P07998 | LLLVLILLVLGWVQPSLGKE  | Negative |
| P07998 | LVLGWVQPSLGKESRAKKFQ  | Negative |
| P07998 | MALEKSLVRLLLLLVLILLVL | Negative |
| P07998 | LGKESRAKKFQRQHMDSDSS  | Negative |
| P07998 | WVQPSLGKESRAKKFQRQHM  | Negative |

|        |                       |          |
|--------|-----------------------|----------|
| P07998 | QPSLGKESRAKKFQRQHMDS  | Negative |
| P07998 | EKSLVRLLLLVLILLVLGWV  | Negative |
| P07998 | SLVRLLLLVLILLVLGWVQP  | Negative |
| P07998 | LGWVQPSLGKESRAKKFQRQ  | Negative |
| P07998 | LEKSLVRLLLLVLILLVLGW  | Negative |
| P07998 | VQPSLGKESRAKKFQRQHMD  | Negative |
| P07998 | VLGWVQPSLGKESRAKKFQR  | Negative |
| P07998 | VRLLLLVLILLVLGWVQPSL  | Negative |
| P07998 | KSLVRLLLLVLILLVLGWVQ  | Negative |
| P07998 | ESRAKKFQRQHMDSDSSPSS  | Negative |
| P07998 | KESRAKKFQRQHMDSDSSPS  | Negative |
| P07998 | ALEKSLVRLLLLVLILLVLG  | Negative |
| P07998 | LLVLILLVLGWVQPSLGKES  | Negative |
| P07998 | PSLGKESRAKKFQRQHMDSD  | Negative |
| P08001 | PCGLRFRQKLESGMRVVGGM  | Negative |
| P08001 | AARDNATCDGPCGLRFRQKL  | Negative |
| P08001 | ARDNATCDGPCGLRFRQKLE  | Negative |
| P08001 | AVLLVLAVSVAARDNATCDG  | Negative |
| P08001 | GPCGLRFRQKLESGMRVVG   | Negative |
| P08001 | VLAVSVAARDNATCDGPCGL  | Negative |
| P08001 | TAVLLVLAVSVAARDNATCD  | Negative |
| P08001 | LAVSVAARDNATCDGPCGLR  | Negative |
| P08001 | FRQKLESGMRVVGGMSEAEPG | Negative |
| P08001 | DNATCDGPCGLRFRQKLESG  | Negative |
| P08001 | NATCDGPCGLRFRQKLESGM  | Negative |
| P08001 | LLVLAVSVAARDNATCDGPC  | Negative |
| P08001 | ATCDGPCGLRFRQKLESGMR  | Negative |
| P08001 | LVLAVSVAARDNATCDGPCG  | Negative |
| P08001 | RFRQKLESGMRVVGGMSEAEP | Negative |
| P08001 | VLLVLAVSVAARDNATCDGP  | Negative |
| P08001 | PTAVLLVLAVSVAARDNATC  | Negative |
| P08001 | CGLRFRQKLESGMRVVGGM   | Negative |
| P08001 | AVSVAARDNATCDGPCGLRF  | Negative |
| P08001 | TCDGPCGLRFRQKLESGMRV  | Negative |
| P08001 | DGPCGLRFRQKLESGMRVVG  | Negative |
| P08001 | RDNATCDGPCGLRFRQKLES  | Negative |
| P08001 | VSVAARDNATCDGPCGLRFR  | Negative |
| P08001 | VAARDNATCDGPCGLRFRQK  | Negative |
| P08001 | CDGPCGLRFRQKLESGMRVV  | Negative |
| P08001 | LRFRQKLESGMRVVGGMSEA  | Negative |
| P08001 | SVAARDNATCDGPCGLRFRQ  | Negative |
| P08001 | MLPTAVLLVLAVSVAARDNA  | Negative |
| P08001 | GLRFRQKLESGMRVVGGM    | Negative |
| P08056 | ATLIGSTLASSCSSTALSCS  | Negative |
| P08056 | CSNSANSdTCCSPEYGLVVL  | Negative |
| P08056 | SNSANSdTCCSPEYGLVVLN  | Negative |

|        |                       |          |
|--------|-----------------------|----------|
| P08056 | AVLALATLIGSTLASSCSST  | Negative |
| P08056 | CSSTALSCSNANSNDTCCSP  | Negative |
| P08056 | ASSCSSTALSCSNANSDTC   | Negative |
| P08056 | SSTALSCSNANSNDTCCSPE  | Negative |
| P08056 | LALATLIGSTLASSCSSTAL  | Negative |
| P08056 | TLASSCSSTALSCSNANSND  | Negative |
| P08056 | SCSSTALSCSNANSNDTCCS  | Negative |
| P08056 | SANSNDTCCSPEYGLVVLNMQ | Negative |
| P08056 | STLASSCSSTALSCSNANS   | Negative |
| P08056 | ANSNDTCCSPEYGLVVLNMQW | Negative |
| P08056 | STALSCSNANSNDTCCSPEY  | Negative |
| P08056 | GSTLASSCSSTALSCSNAN   | Negative |
| P08056 | LIGSTLASSCSSTALSCSNS  | Negative |
| P08056 | ALSCSNANSNDTCCSPEYGL  | Negative |
| P08056 | TLIGSTLASSCSSTALSCSN  | Negative |
| P08056 | LSCSNANSNDTCCSPEYGLV  | Negative |
| P08056 | SCSNANSNDTCCSPEYGLVV  | Negative |
| P08056 | ALATLIGSTLASSCSSTALS  | Negative |
| P08056 | VLALATLIGSTLASSCSSTA  | Negative |
| P08056 | IGSTLASSCSSTALSCNSA   | Negative |
| P08056 | TALSCSNANSNDTCCSPEYG  | Negative |
| P08056 | LASSCSSTALSCSNANSNDT  | Negative |
| P08056 | NSANSNDTCCSPEYGLVVLNM | Negative |
| P08056 | MKAVLALATLIGSTLASSCS  | Negative |
| P08056 | LATLIGSTLASSCSSTALSC  | Negative |
| P08056 | SSCSSTALSCSNANSNDTCC  | Negative |
| P08118 | CNASCYFIPNEGVPGDSTRK  | Negative |
| P08118 | VIFATFVTLCNASCYFIPNE  | Negative |
| P08118 | NASCYFIPNEGVPGDSTRKC  | Negative |
| P08118 | ASCYFIPNEGVPGDSTRKCM  | Negative |
| P08118 | VVIFATFVTLCNASCYFIPN  | Negative |
| P08118 | NVLLGSVVIFATFVTLCNAS  | Negative |
| P08118 | NEGVPGDSTRKCMDLKGNKH  | Negative |
| P08118 | FIPNEGVPGDSTRKCMDLKG  | Negative |
| P08118 | LGSVVIFATFVTLCNASCYF  | Negative |
| P08118 | LCNASCYFIPNEGVPGDSTR  | Negative |
| P08118 | SVVIFATFVTLCNASCYFIP  | Negative |
| P08118 | SCYFIPNEGVPGDSTRKCMD  | Negative |
| P08118 | TFVTLCNASCYFIPNEGVP   | Negative |
| P08118 | VTLCNASCYFIPNEGVPGDS  | Negative |
| P08118 | IFATFVTLCNASCYFIPNEG  | Negative |
| P08118 | ATFVTLCNASCYFIPNEGVP  | Negative |
| P08118 | LLGSVVIFATFVTLCNASCY  | Negative |
| P08118 | CYFIPNEGVPGDSTRKCMDL  | Negative |
| P08118 | IPNEGVPGDSTRKCMDLKGN  | Negative |
| P08118 | VLLGSVVIFATFVTLCNASC  | Negative |

|        |                       |          |
|--------|-----------------------|----------|
| P08118 | MNVLLGSVVIFATFVTLICNA | Negative |
| P08118 | EGVPGDSTRKCMDLKGNKHP  | Negative |
| P08118 | GVPGDSTRKCMDLKGNKHPI  | Negative |
| P08118 | TLCNASCYFIPNEGVPGDST  | Negative |
| P08118 | FVTLCNASCYFIPNEGVPGD  | Negative |
| P08118 | VPGDSTRKCMDLKGNKHPIN  | Negative |
| P08118 | FATFVTLCNASCYFIPNEGV  | Negative |
| P08118 | PNEGVPGDSTRKCMDLKGNK  | Negative |
| P08118 | YFIPNEGVPGDSTRKCMDLK  | Negative |
| P08125 | DGYFSERYQKQSSIKGPPHF  | Negative |
| P08125 | FSERYQKQSSIKGPPHFLPF  | Negative |
| P08125 | GSDGYFSERYQKQSSIKGPP  | Negative |
| P08125 | QKQSSIKGPPHFLPFNVKSQ  | Negative |
| P08125 | MHLQISLLLLFCLNIVHGSD  | Negative |
| P08125 | FCLNIVHGSDGYFSERYQKQ  | Negative |
| P08125 | RYQKQSSIKGPPHFLPFNVK  | Negative |
| P08125 | LLLFCLNIVHGSDGYFSERY  | Negative |
| P08125 | NIVHGSDGYFSERYQKQSSI  | Negative |
| P08125 | HGSDGYFSERYQKQSSIKGP  | Negative |
| P08125 | CLNIVHGSDGYFSERYQKQS  | Negative |
| P08125 | HLQISLLLLFCLNIVHGSDG  | Negative |
| P08125 | GYFSERYQKQSSIKGPPHFL  | Negative |
| P08125 | LQISLLLLFCLNIVHGSDGY  | Negative |
| P08125 | LLFCLNIVHGSDGYFSERYQ  | Negative |
| P08125 | ERYQKQSSIKGPPHFLPFNV  | Negative |
| P08125 | VHGSDGYFSERYQKQSSIKG  | Negative |
| P08125 | QSSIKGPPHFLPFNVKSQGV  | Negative |
| P08125 | KQSSIKGPPHFLPFNVKSQG  | Negative |
| P08125 | LNIVHGSDGYFSERYQKQSS  | Negative |
| P08125 | YFSERYQKQSSIKGPPHFLP  | Negative |
| P08125 | SERYQKQSSIKGPPHFLPFN  | Negative |
| P08125 | IVHGSDGYFSERYQKQSSIK  | Negative |
| P08125 | YQKQSSIKGPPHFLPFNVKS  | Negative |
| P08125 | LLLLFCLNIVHGSDGYFSER  | Negative |
| P08125 | SLLLLFCLNIVHGSDGYFSE  | Negative |
| P08125 | LFCLNIVHGSDGYFSERYQK  | Negative |
| P08125 | ISLLLLFCLNIVHGSDGYFS  | Negative |
| P08125 | SDGYFSERYQKQSSIKGPPH  | Negative |
| P08174 | PAVWGDCGLPPDVPNAQPAL  | Negative |
| P08174 | ALPLLGEPLRLLLLVLLCLP  | Negative |
| P08174 | LLGEPLRLLLLVLLCLPAVW  | Negative |
| P08174 | LPLLGEPLRLLLLVLLCLPA  | Negative |
| P08174 | AALPLLGEPLRLLLLVLLCL  | Negative |
| P08174 | VPAALPLLGEPLRLLLLVLL  | Negative |
| P08174 | CLPAVWGDCGLPPDVPNAQP  | Negative |
| P08174 | LVLLCLPAVWGDCGLPPDVP  | Negative |

|        |                       |          |
|--------|-----------------------|----------|
| P08174 | ELPRLLLLVLCLCPAVWGDC  | Negative |
| P08174 | LPAVWGDCGLPPDVPNAQPA  | Negative |
| P08174 | LLVLLCLPAVWGDCGLPPDV  | Negative |
| P08174 | VLLCLPAVWGDCGLPPDVPN  | Negative |
| P08174 | GELPRLLLLVLCLCPAVWGD  | Negative |
| P08174 | SVPAALPLLGEPRLLLLVL   | Negative |
| P08174 | RPSVPAALPLLGEPRLLLL   | Negative |
| P08174 | PLLGEPRLLLLVLCLPAV    | Negative |
| P08174 | LLLVLCLPAVWGDCGLPPD   | Negative |
| P08174 | LLCLPAVWGDCGLPPDVPNA  | Negative |
| P08174 | VARPSVPAALPLLGEPRLL   | Negative |
| P08174 | PSVPAALPLLGEPRLLLLV   | Negative |
| P08174 | LCLPAVWGDCGLPPDVPNAQ  | Negative |
| P08174 | LPRLLLLVLCLPAVWGDCG   | Negative |
| P08174 | ARPSVPAALPLLGEPRLLL   | Negative |
| P08174 | LGELPRLLLLVLCLPAVWG   | Negative |
| P08174 | PAALPLLGEPRLLLLVLLC   | Negative |
| P08174 | PRLLLLVLCLPAVWGDCGL   | Negative |
| P08174 | MTVARPSVPAALPLLGEPR   | Negative |
| P08174 | LLLVLCLPAVWGDCGLPP    | Negative |
| P08174 | TVARPSVPAALPLLGEPRL   | Negative |
| P08176 | LLALSAVYARPSSIKTFEY   | Negative |
| P08176 | SSIKTFEYKKA FNKSYATF  | Negative |
| P08176 | IVLAIASLLALSAVYARPSS  | Negative |
| P08176 | KKAFNKSyatFEDEEAARKN  | Negative |
| P08176 | AVYARPSSIKTFEYKKA FN  | Negative |
| P08176 | SAVYARPSSIKTFEYKKA F  | Negative |
| P08176 | VYARPSSIKTFEYKKA FNK  | Negative |
| P08176 | ARPSSIKTFEYKKA FNKSY  | Negative |
| P08176 | YARPSSIKTFEYKKA FNKS  | Negative |
| P08176 | ASLLALSAVYARPSSIKTFE  | Negative |
| P08176 | FEEYKKA FNKSYATFEDEEA | Negative |
| P08176 | LSAVYARPSSIKTFEYKKA   | Negative |
| P08176 | YKKA FNKSYATFEDEEAARK | Negative |
| P08176 | MKIVLAIASLLALSAVYARP  | Negative |
| P08176 | KIVLAIASLLALSAVYARPS  | Negative |
| P08176 | TFEEYKKA FNKSYATFEDEE | Negative |
| P08176 | SLLALSAVYARPSSIKTFE   | Negative |
| P08176 | LAIASLLALSAVYARPSSI   | Negative |
| P08176 | AIASLLALSAVYARPSSI    | Negative |
| P08176 | IKTFEEYKKA FNKSYATFED | Negative |
| P08176 | PSSIKTFEYKKA FNKSYAT  | Negative |
| P08176 | KTFEEYKKA FNKSYATFEDE | Negative |
| P08176 | ALSAVYARPSSIKTFEYKK   | Negative |
| P08176 | EYKKA FNKSYATFEDEEAAR | Negative |
| P08176 | IASLLALSAVYARPSSI     | Negative |

|        |                       |          |
|--------|-----------------------|----------|
| P08176 | LALSAVYARPSSIKTFEELYK | Negative |
| P08176 | SIKTFEELYKKAFNKSYATFE | Negative |
| P08176 | RPSSIKTFEELYKKAFNKSYA | Negative |
| P08176 | EEYKKAFNKSYATFEDEEAA  | Negative |
| P08185 | TSGLWTVQAMDPNAAAYVNMS | Negative |
| P08185 | LLLYTCLLWLPTSGLWTVQA  | Negative |
| P08185 | AYVNMSNHHRGLASANVDFA  | Negative |
| P08185 | PNAAYVNMSNHHRGLASANV  | Negative |
| P08185 | AMDPNAAAYVNMSNHHRGLAS | Negative |
| P08185 | NAAAYVNMSNHHRGLASANVD | Negative |
| P08185 | YTCLLWLPTSGLWTVQAMDP  | Negative |
| P08185 | LPTSGLWTVQAMDPNAAAYVN | Negative |
| P08185 | AAAYVNMSNHHRGLASANVDF | Negative |
| P08185 | LYTCLLWLPTSGLWTVQAMD  | Negative |
| P08185 | PLLLYTCLLWLPTSGLWTVQ  | Negative |
| P08185 | TCLLWLPTSGLWTVQAMDPN  | Negative |
| P08185 | LWLPTSGLWTVQAMDPNAAAY | Negative |
| P08185 | LLWLPTSGLWTVQAMDPNAA  | Negative |
| P08185 | LWTVQAMDPNAAAYVNMSNH  | Negative |
| P08185 | TVQAMDPNAAAYVNMSNHHRG | Negative |
| P08185 | LLYTCLLWLPTSGLWTVQAM  | Negative |
| P08185 | QAMDPNAAAYVNMSNHHRGLA | Negative |
| P08185 | GLWTVQAMDPNAAAYVNMSNH | Negative |
| P08185 | WTVQAMDPNAAAYVNMSNHHR | Negative |
| P08185 | MPLLLYTCLLWLPTSGLWTV  | Negative |
| P08185 | SGLWTVQAMDPNAAAYVNMSN | Negative |
| P08185 | YVNMSNHHRGLASANVDFAF  | Negative |
| P08185 | MDPNAAAYVNMSNHHRGLASA | Negative |
| P08185 | VNMSNHHRGLASANVDFAFS  | Negative |
| P08185 | PTSGLWTVQAMDPNAAAYVNM | Negative |
| P08185 | VQAMDPNAAAYVNMSNHHRGL | Negative |
| P08185 | WLPTSGLWTVQAMDPNAAAYV | Negative |
| P08185 | DPNAAAYVNMSNHHRGLASAN | Negative |
| P08191 | ITLFAVLLMGWSVNAWSFAC  | Negative |
| P08191 | FACKTANGTAIPIGGGSANV  | Negative |
| P08191 | TANGTAIPIGGGSANVYVNL  | Negative |
| P08191 | SFACKTANGTAIPIGGGSAN  | Negative |
| P08191 | MGWSVNAWSFACKTANGTAI  | Negative |
| P08191 | LMGWSVNAWSFACKTANGTA  | Negative |
| P08191 | KTANGTAIPIGGGSANVYVN  | Negative |
| P08191 | CKTANGTAIPIGGGSANVYV  | Negative |
| P08191 | TLFAVLLMGWSVNAWSFACK  | Negative |
| P08191 | WSFACKTANGTAIPIGGGSA  | Negative |
| P08191 | AVLLMGWSVNAWSFACKTAN  | Negative |
| P08191 | LLMGWSVNAWSFACKTANGT  | Negative |
| P08191 | VNAWSFACKTANGTAIPIGG  | Negative |

|        |                      |          |
|--------|----------------------|----------|
| P08191 | MKRVITLFAVLLMGWSVNAW | Negative |
| P08191 | KRVITLFAVLLMGWSVNAWS | Negative |
| P08191 | TAIPIGGGSANVYVNLAPVV | Negative |
| P08191 | VLLMGWSVNAWSFACKTANG | Negative |
| P08191 | GTAIPIGGGSANVYVNLAPV | Negative |
| P08191 | FAVLLMGWSVNAWSFACKTA | Negative |
| P08191 | GWSVNAWSFACKTANGTAIP | Negative |
| P08191 | ACKTANGTAIPIGGGSANVY | Negative |
| P08191 | NAWSFACKTANGTAIPIGGG | Negative |
| P08191 | NGTAIPIGGGSANVYVNLAP | Negative |
| P08191 | WSVNAWSFACKTANGTAIPI | Negative |
| P08191 | ANGTAIPIGGGSANVYVNLA | Negative |
| P08191 | SVNAWSFACKTANGTAIPIG | Negative |
| P08191 | RVITLFAVLLMGWSVNAWSF | Negative |
| P08191 | VITLFAVLLMGWSVNAWSFA | Negative |
| P08191 | AWSFACKTANGTAIPIGGGS | Negative |
| P08236 | MLYPQESPSRECKELDGLWS | Negative |
| P08236 | SAVAWAALGPLLWGCALGLQ | Negative |
| P08236 | CALGLQGGMLYPQESPSREC | Negative |
| P08236 | ALGPLLWGCALGLQGGMLYP | Negative |
| P08236 | GPLLWGCALGLQGGMLYPQE | Negative |
| P08236 | MARGSAVAWAALGPLLWGCA | Negative |
| P08236 | AALGPLLWGCALGLQGGMLY | Negative |
| P08236 | AVAWAALGPLLWGCALGLQG | Negative |
| P08236 | LGLQGGMLYPQESPSRECKE | Negative |
| P08236 | PQESPSRECKELDGLWSFRA | Negative |
| P08236 | ARGSAVAWAALGPLLWGCAL | Negative |
| P08236 | PLLWGCALGLQGGMLYPQES | Negative |
| P08236 | WGCALGLQGGMLYPQESPSR | Negative |
| P08236 | LGPLLWGCALGLQGGMLYPQ | Negative |
| P08236 | ALGLQGGMLYPQESPSRECK | Negative |
| P08236 | GCALGLQGGMLYPQESPSRE | Negative |
| P08236 | LWGCALGLQGGMLYPQESPS | Negative |
| P08236 | GMLYPQESPSRECKELDGLW | Negative |
| P08236 | GGMLYPQESPSRECKELDGL | Negative |
| P08236 | LQGGMLYPQESPSRECKELD | Negative |
| P08236 | GSAVAWAALGPLLWGCALGL | Negative |
| P08236 | GLQGGMLYPQESPSRECKEL | Negative |
| P08236 | WAALGPLLWGCALGLQGGML | Negative |
| P08236 | QGGMLYPQESPSRECKELDG | Negative |
| P08236 | VAWAALGPLLWGCALGLQGG | Negative |
| P08236 | RGSAVAWAALGPLLWGCALG | Negative |
| P08236 | LLWGCALGLQGGMLYPQESP | Negative |
| P08236 | LYPQESPSRECKELDGLWSF | Negative |
| P08236 | YPQESPSRECKELDGLWSFR | Negative |
| P08289 | YWRQQAQETLKNALKLQKLN | Negative |



|        |                      |          |
|--------|----------------------|----------|
| P08289 | LTNSFVPEKEKDPSYWRQQA | Negative |
| P08289 | FLVLAIGTCLTNSFVPEKEK | Negative |
| P08289 | CLTNSFVPEKEKDPSYWRQQ | Negative |
| P08289 | IGTCLTNSFVPEKEKDPSYW | Negative |
| P08289 | EKEKDPSYWRQQAQETLKNA | Negative |
| P08289 | VLAIGTCLTNSFVPEKEKDP | Negative |
| P08289 | DPSYWRQQAQETLKNALKLQ | Negative |
| P08289 | WRQQAQETLKNALKLQKLNT | Negative |
| P08289 | AIGTCLTNSFVPEKEKDPSY | Negative |
| P08289 | FVPEKEKDPSYWRQQAQETL | Negative |
| P08289 | NSFVPEKEKDPSYWRQQAQE | Negative |
| P08289 | LAIGTCLTNSFVPEKEKDPS | Negative |
| P08289 | KDPSYWRQQAQETLKNALKL | Negative |
| P08289 | GTCLTNSFVPEKEKDPSYWR | Negative |
| P08289 | VPEKEKDPSYWRQQAQETLK | Negative |
| P08289 | PFLVLAIGTCLTNSFVPEKE | Negative |
| P08289 | TNSFVPEKEKDPSYWRQQAQ | Negative |
| P08289 | SYWRQQAQETLKNALKLQKL | Negative |
| P08289 | ILPFLVLAIGTCLTNSFVPE | Negative |
| P08289 | LVLAIGTCLTNSFVPEKEKD | Negative |
| P08289 | EKDPSYWRQQAQETLKNALK | Negative |
| P08289 | PEKEKDPSYWRQQAQETLKN | Negative |
| P08289 | RQQAQETLKNALKLQKLNTN | Negative |
| P08289 | SFVPEKEKDPSYWRQQAQET | Negative |
| P08289 | TCLTNSFVPEKEKDPSYWRQ | Negative |
| P08289 | MILPFLVLAIGTCLTNSFVP | Negative |
| P08289 | KEKDPSYWRQQAQETLKNAL | Negative |
| P08289 | PSYWRQQAQETLKNALKLQK | Negative |
| P08331 | SVNAATVDLRIMETTDLHSN | Negative |
| P08331 | FSATLLATLIAASVNAATVD | Negative |
| P08331 | METTDLHSNMMDFDYYKDTA | Negative |
| P08331 | LRIMETTDLHSNMMDFDYYK | Negative |
| P08331 | KFSATLLATLIAASVNAATV | Negative |
| P08331 | VNAATVDLRIMETTDLHSNM | Negative |
| P08331 | ATVDLRIMETTDLHSNMMDF | Negative |
| P08331 | ETTDLHSNMMDFDYYKDTAT | Negative |
| P08331 | DLRIMETTDLHSNMMDFDYY | Negative |
| P08331 | LIAASVNAATVDLRIMETTD | Negative |
| P08331 | TLIAASVNAATVDLRIMETT | Negative |
| P08331 | TDLHSNMMDFDYYKDTATEK | Negative |
| P08331 | NAATVDLRIMETTDLHSNMM | Negative |
| P08331 | RIMETTDLHSNMMDFDYYKD | Negative |
| P08331 | TVDLRIMETTDLHSNMMDFD | Negative |
| P08331 | ATLIAASVNAATVDLRIMET | Negative |
| P08331 | AASVNAATVDLRIMETTDLH | Negative |
| P08331 | ATLLATLIAASVNAATVDLR | Negative |

|        |                      |          |
|--------|----------------------|----------|
| P08331 | LATLIAASVNAATVDLRIME | Negative |
| P08331 | MIKFSATLLATLIAASVNAA | Negative |
| P08331 | IMETTDLHSNMMDFDYYKDT | Negative |
| P08331 | LLATLIAASVNAATVDLRIM | Negative |
| P08331 | TTDLHSNMMDFDYYKDTATE | Negative |
| P08331 | TLLATLIAASVNAATVDLRI | Negative |
| P08331 | ASVNAATVDLRIMETTDLHS | Negative |
| P08331 | IKFSATLLATLIAASVNAAT | Negative |
| P08331 | AATVDLRIMETTDLHSNMMD | Negative |
| P08331 | VDLRIMETTDLHSNMMDFDY | Negative |
| P08331 | IAASVNAATVDLRIMETTDL | Negative |
| P08375 | LAVFAGQSQAGWLKKIGKKI | Negative |
| P08375 | ALILAVFAGQSQAGWLKKIG | Negative |
| P08375 | SQAGWLKKIGKKIERVGQHT | Negative |
| P08375 | GKKIERVGQHTRDATIQGLG | Negative |
| P08375 | NIFIFVALILAVFAGQSQAG | Negative |
| P08375 | VFAGQSQAGWLKKIGKKIER | Negative |
| P08375 | MNFQNIFIFVALILAVFAGQ | Negative |
| P08375 | IFIFVALILAVFAGQSQAGW | Negative |
| P08375 | KKIGKKIERVGQHTRDATIQ | Negative |
| P08375 | QNIFIFVALILAVFAGQSQA | Negative |
| P08375 | AVFAGQSQAGWLKKIGKKIE | Negative |
| P08375 | IFVALILAVFAGQSQAGWLK | Negative |
| P08375 | VALILAVFAGQSQAGWLKKI | Negative |
| P08375 | FIFVALILAVFAGQSQAGWL | Negative |
| P08375 | NFQNIFIFVALILAVFAGQS | Negative |
| P08375 | QAGWLKKIGKKIERVGQHTR | Negative |
| P08375 | GWLKKIGKKIERVGQHTRDA | Negative |
| P08375 | KIGKKIERVGQHTRDATIQG | Negative |
| P08375 | LKKIGKKIERVGQHTRDATI | Negative |
| P08375 | LILAVFAGQSQAGWLKKIGK | Negative |
| P08375 | AGWLKKIGKKIERVGQHTRD | Negative |
| P08375 | FAGQSQAGWLKKIGKKIERV | Negative |
| P08375 | AGQSQAGWLKKIGKKIERVG | Negative |
| P08375 | IGKKIERVGQHTRDATIQGL | Negative |
| P08375 | FQNIFIFVALILAVFAGQSQ | Negative |
| P08375 | GQSQAGWLKKIGKKIERVGQ | Negative |
| P08375 | WLKKIGKKIERVGQHTRDAT | Negative |
| P08375 | QSQAGWLKKIGKKIERVGQH | Negative |
| P08375 | ILAVFAGQSQAGWLKKIGKK | Negative |
| P08379 | AQLNFSAGWGRRYADPNADP | Negative |
| P08379 | AALATAQLNFSAGWGRRYAD | Negative |
| P08379 | WGRRYADPNADPMAFLYRLI | Negative |
| P08379 | FSAGWGRRYADPNADPMAFL | Negative |
| P08379 | QSCTLTLLVAVLAALATA   | Negative |
| P08379 | CTLTLVAVLAALATAQL    | Negative |

|        |                       |          |
|--------|-----------------------|----------|
| P08379 | LNFSAGWGRRYADPNADPMA  | Negative |
| P08379 | VAVLAALATAQLNFSAGWGR  | Negative |
| P08379 | GWGRRYADPNADPMAFLYRL  | Negative |
| P08379 | LAALATAQLNFSAGWGRRYA  | Negative |
| P08379 | TLTLVLVVAVLAALATAQLN  | Negative |
| P08379 | LATAQLNFSAGWGRRYADPN  | Negative |
| P08379 | LVLVVAVLAALATAQLNFS   | Negative |
| P08379 | NFSAGWGRRYADPNADPMAF  | Negative |
| P08379 | LTLVLVVAVLAALATAQLNF  | Negative |
| P08379 | LVVAVLAALATAQLNFSAGW  | Negative |
| P08379 | AGWGRRYADPNADPMAFLYR  | Negative |
| P08379 | VLAALATAQLNFSAGWGRRY  | Negative |
| P08379 | SCTLTLVLVVAVLAALATAQ  | Negative |
| P08379 | VVAVLAALATAQLNFSAGWG  | Negative |
| P08379 | ATAQLNFSAGWGRRYADPNA  | Negative |
| P08379 | TQSCTLTLVLVVAVLAALAT  | Negative |
| P08379 | QLNFSAGWGRRYADPNADPM  | Negative |
| P08379 | AVLAALATAQLNFSAGWGRR  | Negative |
| P08379 | MTQSCTLTLVLVVAVLAALA  | Negative |
| P08379 | VLVVAVLAALATAQLNFSAG  | Negative |
| P08379 | ALATAQLNFSAGWGRRYADP  | Negative |
| P08379 | SAGWGRRYADPNADPMAFLY  | Negative |
| P08379 | TAQLNFSAGWGRRYADPNAD  | Negative |
| P08505 | FPTSQVRRGDFTEDTTPNRP  | Negative |
| P08505 | LSARDFHPVAFLGLMLVTTT  | Negative |
| P08505 | LMLVTTTAFPTSQVRRGDF   | Negative |
| P08505 | TSQVRRGDFTEDTTPNRPVY  | Negative |
| P08505 | FLGLMLVTTTAFPTSQVRRG  | Negative |
| P08505 | TTAFPTSQVRRGDFTEDTTP  | Negative |
| P08505 | SARDFHPVAFLGLMLVTTTA  | Negative |
| P08505 | TTTAFPTSQVRRGDFTEDTT  | Negative |
| P08505 | GLMLVTTTAFPTSQVRRGDF  | Negative |
| P08505 | ARDFHPVAFLGLMLVTTTAF  | Negative |
| P08505 | LGLMLVTTTAFPTSQVRRGD  | Negative |
| P08505 | QVRRGDFTEDTTPNRPVYTT  | Negative |
| P08505 | RDFHPVAFLGLMLVTTTAFP  | Negative |
| P08505 | LVTTTAFPTSQVRRGDFTED  | Negative |
| P08505 | PVAFLGLMLVTTTAFPTSQV  | Negative |
| P08505 | TAFPTSQVRRGDFTEDTTPN  | Negative |
| P08505 | VAFGLGLMLVTTTAFPTSQVR | Negative |
| P08505 | FHPVAFLGLMLVTTTAFPTS  | Negative |
| P08505 | PTSQVRRGDFTEDTTPNRPV  | Negative |
| P08505 | KFLSARDFHPVAFLGLMLVT  | Negative |
| P08505 | FLSARDFHPVAFLGLMLVTT  | Negative |
| P08505 | AFPTSQVRRGDFTEDTTPNR  | Negative |
| P08505 | AFLGLMLVTTTAFPTSQVRR  | Negative |

|        |                      |          |
|--------|----------------------|----------|
| P08505 | VTTFAPTSQVRRGDFTEDT  | Negative |
| P08505 | SQVRRGDFTEDTTPNRPVYT | Negative |
| P08505 | DFHPVAFLGLMLVTTFAPPT | Negative |
| P08505 | VRRGDFTEDTTPNRPVYTTS | Negative |
| P08505 | MKFLSARDFHPVAFLGLMLV | Negative |
| P08505 | MLVTTFAPTSQVRRGDFTE  | Negative |
| P08506 | AFAAEQTVEAPSVDARAWIL | Negative |
| P08506 | TAFAAEQTVEAPSVDARAWI | Negative |
| P08506 | FLFLFAPTAFAAEQTVEAPS | Negative |
| P08506 | TQYSSLLRGLAAGSAFLFLF | Negative |
| P08506 | RGLAAGSAFLFLFAPTAFAA | Negative |
| P08506 | LLRGLAAGSAFLFLFAPTAF | Negative |
| P08506 | MTQYSSLLRGLAAGSAFLFL | Negative |
| P08506 | LFAPTAFAAEQTVEAPSVDA | Negative |
| P08506 | AAEQTVEAPSVDARAWILMD | Negative |
| P08506 | SAFLFLFAPTAFAAEQTVEA | Negative |
| P08506 | QTVEAPSVDARAWILMDYAS | Negative |
| P08506 | PTAFAAEQTVEAPSVDARAW | Negative |
| P08506 | AEQTVEAPSVDARAWILMDY | Negative |
| P08506 | AFLFLFAPTAFAAEQTVEAP | Negative |
| P08506 | LRGLAAGSAFLFLFAPTAF  | Negative |
| P08506 | AAGSAFLFLFAPTAFAAEQT | Negative |
| P08506 | LAAGSAFLFLFAPTAFAAEQ | Negative |
| P08506 | QYSSLLRGLAAGSAFLFLFA | Negative |
| P08506 | LFLFAPTAFAAEQTVEAPSV | Negative |
| P08506 | YSSLLRGLAAGSAFLFLFAP | Negative |
| P08506 | GLAAGSAFLFLFAPTAFAAE | Negative |
| P08506 | GSAFLFLFAPTAFAAEQTVE | Negative |
| P08506 | FAPTAFAAEQTVEAPSVDAR | Negative |
| P08506 | FLFAPTAFAAEQTVEAPSVD | Negative |
| P08506 | EQTVEAPSVDARAWILMDYA | Negative |
| P08506 | SSLLRGLAAGSAFLFLFAPT | Negative |
| P08506 | FAAEQTVEAPSVDARAWILM | Negative |
| P08506 | SLLRGLAAGSAFLFLFAPTA | Negative |
| P08506 | APTAFAAEQTVEAPSVDARA | Negative |
| P08582 | GMEVRWCATSDPEQHKCGNM | Negative |
| P08582 | DPEQHKCGNMSEAFREAGIQ | Negative |
| P08582 | TSDPEQHKCGNMSEAFREAG | Negative |
| P08582 | MRGPSGALWLLALRTVLGG  | Negative |
| P08582 | RTVLGGMEVRWCATSDPEQH | Negative |
| P08582 | GPSGALWLLALRTVLGGME  | Negative |
| P08582 | LALRTVLGGMEVRWCATSDP | Negative |
| P08582 | WCATSDPEQHKCGNMSEAFR | Negative |
| P08582 | RGPSGALWLLALRTVLGGM  | Negative |
| P08582 | SDPEQHKCGNMSEAFREAGI | Negative |
| P08582 | LGGMEVRWCATSDPEQHKCG | Negative |

|        |                       |          |
|--------|-----------------------|----------|
| P08582 | VRWCATSDPEQHKCGNMSEA  | Negative |
| P08582 | MEVRWCATSDPEQHKCGNMS  | Negative |
| P08582 | PSGALWLLLALRTVLGGMEV  | Negative |
| P08582 | VLGGMEVRWCATSDPEQHKC  | Negative |
| P08582 | EVRWCATSDPEQHKCGNMSE  | Negative |
| P08582 | LRTVLGGMEVRWCATSDPEQ  | Negative |
| P08582 | ALWLLLALRTVLGGMEVRWC  | Negative |
| P08582 | WLLLALRTVLGGMEVRWCAT  | Negative |
| P08582 | LLLALRTVLGGMEVRWCATS  | Negative |
| P08582 | TVLGGMEVRWCATSDPEQHK  | Negative |
| P08582 | GGMEVRWCATSDPEQHKCGN  | Negative |
| P08582 | CATSDPEQHKCGNMSEAFRE  | Negative |
| P08582 | GALWLLLALRTVLGGMEVRW  | Negative |
| P08582 | ALRTVLGGMEVRWCATSDPE  | Negative |
| P08582 | RWCATSDPEQHKCGNMSEAF  | Negative |
| P08582 | LWLLLALRTVLGGMEVRWCA  | Negative |
| P08582 | ATSDPEQHKCGNMSEAFREA  | Negative |
| P08582 | LLALRTVLGGMEVRWCATSD  | Negative |
| P08603 | WAICVAEDCNELPPRRNTEI  | Negative |
| P08603 | LLAKIICLMLWAICVAEDCN  | Negative |
| P08603 | AICVAEDCNELPPRRNTEIL  | Negative |
| P08603 | CNELPPRRNTEILTGSWSDQ  | Negative |
| P08603 | AEDCNELPPRRNTEILTGSW  | Negative |
| P08603 | LPPRRNTEILTGSWSDQTY   | Negative |
| P08603 | CVAEDCNELPPRRNTEILTG  | Negative |
| P08603 | AKIICLMLWAICVAEDCNEL  | Negative |
| P08603 | KIICLMLWAICVAEDCNELP  | Negative |
| P08603 | LWAICVAEDCNELPPRRNTE  | Negative |
| P08603 | NELPPRRNTEILTGSWSDQT  | Negative |
| P08603 | ICVAEDCNELPPRRNTEILT  | Negative |
| P08603 | IICLMLWAICVAEDCNELPP  | Negative |
| P08603 | NTEILTGSWSDQTYPEGTQA  | Negative |
| P08603 | VAEDCNELPPRRNTEILTGS  | Negative |
| P08603 | CLMLWAICVAEDCNELPPRR  | Negative |
| P08603 | RNTEILTGSWSDQTYPEGTQ  | Negative |
| P08603 | ICLMLWAICVAEDCNELPPR  | Negative |
| P08603 | MLWAICVAEDCNELPPRRNT  | Negative |
| P08603 | DCNELPPRRNTEILTGSWSD  | Negative |
| P08603 | ELPPRRNTEILTGSWSDQTY  | Negative |
| P08603 | PPRRNTEILTGSWSDQTYPEG | Negative |
| P08603 | TEILTGSWSDQTYPEGTQAI  | Negative |
| P08603 | EDCNELPPRRNTEILTGSWS  | Negative |
| P08603 | RLLAKIICLMLWAICVAEDC  | Negative |
| P08603 | MRLLAKIICLMLWAICVAED  | Negative |
| P08603 | RRNTEILTGSWSDQTYPEGT  | Negative |
| P08603 | PPRRNTEILTGSWSDQTYPE  | Negative |

|        |                       |          |
|--------|-----------------------|----------|
| P08603 | LMLWAICVAEDCNELPPRRN  | Negative |
| P08697 | PCSVFSPVSAMEPLGRQLTS  | Negative |
| P08697 | GLLVLSWSCSLQGPCSVFSPV | Negative |
| P08697 | CSVFSPVSAMEPLGRQLTSG  | Negative |
| P08697 | ALLWGLLVLSWSCSLQGPCSV | Negative |
| P08697 | LWGLLVLSWSCSLQGPCSVFS | Negative |
| P08697 | SAMEPLGRQLTSGPNQEQVS  | Negative |
| P08697 | QGPCSVFSPVSAMEPLGRQL  | Negative |
| P08697 | WGLLVLSWSCSLQGPCSVFSP | Negative |
| P08697 | SPVSAMEPLGRQLTSGPNQE  | Negative |
| P08697 | WSCSLQGPCSVFSPVSAMEPL | Negative |
| P08697 | PVSAMEPLGRQLTSGPNQEQ  | Negative |
| P08697 | MEPLGRQLTSGPNQEQVSPL  | Negative |
| P08697 | LVLSWSCSLQGPCSVFSPVSA | Negative |
| P08697 | VLSWSCSLQGPCSVFSPVSAM | Negative |
| P08697 | SVFSPVSAMEPLGRQLTSGP  | Negative |
| P08697 | SWSCSLQGPCSVFSPVSAMEP | Negative |
| P08697 | PLGRQLTSGPNQEQVSPLTL  | Negative |
| P08697 | LLVLSWSCSLQGPCSVFSPVS | Negative |
| P08697 | LLWGLLVLSWSCSLQGPCSVF | Negative |
| P08697 | AMEPLGRQLTSGPNQEQVSP  | Negative |
| P08697 | LQGPCSVFSPVSAMEPLGRQ  | Negative |
| P08697 | GPCSVFSPVSAMEPLGRQLT  | Negative |
| P08697 | MALLWGLLVLSWSCSLQGPCS | Negative |
| P08697 | FSPVSAMEPLGRQLTSGPNQ  | Negative |
| P08697 | LSWSCSLQGPCSVFSPVSAME | Negative |
| P08697 | VFSPVSAMEPLGRQLTSGPN  | Negative |
| P08697 | VSAMEPLGRQLTSGPNQEQV  | Negative |
| P08697 | EPLGRQLTSGPNQEQVSPLT  | Negative |
| P08697 | CLQGPCSVFSPVSAMEPLGR  | Negative |
| P08721 | CLFGLASCLPVKVAEFGSSE  | Negative |
| P08721 | VKVAEFGSSEEKAHYSKHSD  | Negative |
| P08721 | ASCLPVKVAEFGSSEEKAHY  | Negative |
| P08721 | AEFGSSEEKAHYSKHSDAVA  | Negative |
| P08721 | VCFCFLFGLASCLPVKVAEFG | Negative |
| P08721 | EEKAHYSKHSDAVATWLKPD  | Negative |
| P08721 | AVVCFCFLFGLASCLPVKVAE | Negative |
| P08721 | FGLASCLPVKVAEFGSSEEK  | Negative |
| P08721 | SSEEKAHYSKHSDAVATWLK  | Negative |
| P08721 | FCLFGLASCLPVKVAEFGSS  | Negative |
| P08721 | KVAEFGSSEEKAHYSKHSDA  | Negative |
| P08721 | EFGSSEEKAHYSKHSDAVAT  | Negative |
| P08721 | GSSEEKAHYSKHSDAVATWL  | Negative |
| P08721 | LAVVCFCFLFGLASCLPVKVA | Negative |
| P08721 | SCLPVKVAEFGSSEEKAHYS  | Negative |
| P08721 | LPVKVAEFGSSEEKAHYSKH  | Negative |

|        |                      |          |
|--------|----------------------|----------|
| P08721 | VAEFGSSEEKAHYSKHSDAV | Negative |
| P08721 | KAHYSKHSDAVATWLKPDPS | Negative |
| P08721 | MRLAVVCFCLFGLASCLPVK | Negative |
| P08721 | FGSSEEKAHYSKHSDAVATW | Negative |
| P08721 | SEEKAHYSKHSDAVATWLKP | Negative |
| P08721 | CLPVKVAEFGSSEEKAHYSK | Negative |
| P08721 | LFGLASCLPVKVAEFGSSEE | Negative |
| P08721 | LASCLPVKVAEFGSSEEKAH | Negative |
| P08721 | EKAHYSKHSDAVATWLKPD  | Negative |
| P08721 | CFCLFGLASCLPVKVAEFGS | Negative |
| P08721 | GLASCLPVKVAEFGSSEEKA | Negative |
| P08721 | PVKVAEFGSSEEKAHYSKHS | Negative |
| P08721 | VVCFCLFGLASCLPVKVAEF | Negative |
| P08750 | MSKAKAASDPIDINASAAM  | Negative |
| P08750 | VVLTLAVTCLAPMSKAKAAS | Negative |
| P08750 | VTCLAPMSKAKAASDPIDIN | Negative |
| P08750 | LAVTCLAPMSKAKAASDPID | Negative |
| P08750 | PMSKAKAASDPIDINASAAM | Negative |
| P08750 | KAKAASDPIDINASAAMIE  | Negative |
| P08750 | CKQLLSLVVLTLAVTCLAP  | Negative |
| P08750 | TCLAPMSKAKAASDPIDINA | Negative |
| P08750 | NIKKCKQLLSLVVLTLAVT  | Negative |
| P08750 | KAASDPIDINASAAMIEAS  | Negative |
| P08750 | LVVLTLAVTCLAPMSKAKAA | Negative |
| P08750 | LAPMSKAKAASDPIDINASA | Negative |
| P08750 | APMSKAKAASDPIDINASAA | Negative |
| P08750 | SKAKAASDPIDINASAAMI  | Negative |
| P08750 | AKAASDPIDINASAAMIEA  | Negative |
| P08750 | QLLSLVVLTLAVTCLAPMS  | Negative |
| P08750 | SLVVLTLAVTCLAPMSKAKA | Negative |
| P08750 | KKCKQLLSLVVLTLAVTCL  | Negative |
| P08750 | CLAPMSKAKAASDPIDINAS | Negative |
| P08750 | AVTCLAPMSKAKAASDPIDI | Negative |
| P08750 | KCKQLLSLVVLTLAVTCLA  | Negative |
| P08750 | LMSLVVLTLAVTCLAPMSKA | Negative |
| P08750 | VLTLAVTCLAPMSKAKAASD | Negative |
| P08750 | KQLLSLVVLTLAVTCLAPM  | Negative |
| P08750 | LLMSLVVLTLAVTCLAPMSK | Negative |
| P08750 | LTLAVTCLAPMSKAKAASDP | Negative |
| P08750 | IKKCKQLLSLVVLTLAVTC  | Negative |
| P08750 | MSLVVLTLAVTCLAPMSKAK | Negative |
| P08750 | MNIKKCKQLLSLVVLTLAV  | Negative |
| P08751 | METLQGLLWMLLSVGGVWA  | Negative |
| P08751 | LWMLLSVGGVWASRGPLRPL | Negative |
| P08751 | LCPINATLAAEKEACPICI  | Negative |
| P08751 | WMLLSVGGVWASRGPLRPLC | Negative |

|        |                       |          |
|--------|-----------------------|----------|
| P08751 | WASRGPLRPLCRPINATLAA  | Negative |
| P08751 | RGPLRPLCRPINATLAAEKE  | Negative |
| P08751 | LRPLCRPINATLAAEKEACP  | Negative |
| P08751 | TLQGLLLWMLLSVGGVWASR  | Negative |
| P08751 | CRPINATLAAEKEACPICIT  | Negative |
| P08751 | GGVWASRGPLRPLCRPINAT  | Negative |
| P08751 | RPINATLAAEKEACPICITF  | Negative |
| P08751 | RPLCRPINATLAAEKEACPI  | Negative |
| P08751 | ETLQGLLLWMLLSVGGVWAS  | Negative |
| P08751 | LQGLLLWMLLSVGGVWASRG  | Negative |
| P08751 | GPLRPLCRPINATLAAEKEA  | Negative |
| P08751 | VGGVWASRGPLRPLCRPINA  | Negative |
| P08751 | QGLLLWMLLSVGGVWASRGP  | Negative |
| P08751 | PLRPLCRPINATLAAEKEAC  | Negative |
| P08751 | VWASRGPLRPLCRPINATLA  | Negative |
| P08751 | GVWASRGPLRPLCRPINATL  | Negative |
| P08751 | PLCRPINATLAAEKEACPIC  | Negative |
| P08751 | LLLWMLLSVGGVWASRGPLR  | Negative |
| P08751 | LLSVGGVWASRGPLRPLCRP  | Negative |
| P08751 | SRGPLRPLCRPINATLAAEK  | Negative |
| P08751 | ASRGPLRPLCRPINATLAAE  | Negative |
| P08751 | MLLSVGGVWASRGPLRPLCR  | Negative |
| P08751 | LLWMLLSVGGVWASRGPLRP  | Negative |
| P08751 | LSVGGVWASRGPLRPLCRPI  | Negative |
| P08751 | SVGGVWASRGPLRPLCRPIN  | Negative |
| P08796 | VLIIILYNILNSAHSAPTITA | Negative |
| P08796 | KFGVPTYITITGTGFTGTPV  | Negative |
| P08796 | IILYNILNSAHSAPTITAVS  | Negative |
| P08796 | ITAVSNGKFGVPTYITITGT  | Negative |
| P08796 | LYNILNSAHSAPTITAVSNG  | Negative |
| P08796 | NILNSAHSAPTITAVSNGKF  | Negative |
| P08796 | LIILYNILNSAHSAPTITAV  | Negative |
| P08796 | NSAHSAPTITAVSNGKFGVP  | Negative |
| P08796 | TAVSNGKFGVPTYITITGTG  | Negative |
| P08796 | AHSAPTITAVSNGKFGVPTY  | Negative |
| P08796 | VSNGKFGVPTYITITGTGFT  | Negative |
| P08796 | FLLVLIILYNILNSAHSAPT  | Negative |
| P08796 | PTITAVSNGKFGVPTYITIT  | Negative |
| P08796 | MKFLLVLIILYNILNSAHS   | Negative |
| P08796 | YNILNSAHSAPTITAVSNGK  | Negative |
| P08796 | LNSAHSAPTITAVSNGKFGV  | Negative |
| P08796 | SAPTITAVSNGKFGVPTYIT  | Negative |
| P08796 | GKFGVPTYITITGTGFTGTP  | Negative |
| P08796 | AVSNGKFGVPTYITITGTGF  | Negative |
| P08796 | APTITAVSNGKFGVPTYITI  | Negative |
| P08796 | IILYNILNSAHSAPTITAVSN | Negative |



|        |                      |          |
|--------|----------------------|----------|
| P08796 | LLVLIILYNILNSAHSAPTI | Negative |
| P08796 | KFLLVLIILYNILNSAHSAP | Negative |
| P08796 | TITAVSNGKFGVPTYITITG | Negative |
| P08796 | ILNSAHSAPTITAVSNGKFG | Negative |
| P08796 | HSAPTITAVSNGKFGVPTYI | Negative |
| P08796 | SNGKFGVPTYITITGTGFTG | Negative |
| P08796 | SAHSAPTITAVSNGKFGVPT | Negative |
| P08796 | NGKFGVPTYITITGTGFTGT | Negative |
| P08818 | LPPAPAAAAVLLAALTCLLL | Negative |
| P08818 | RTTTRRLPPAPAAAAVLLAA | Negative |
| P08818 | AAVAAAGGHAADRIVRLPGQ | Negative |
| P08818 | LTCLLLRPAAVAAAGGHAAD | Negative |
| P08818 | LLRPAAVAAAGGHAADRIVR | Negative |
| P08818 | TTRRLPPAPAAAAVLLAALT | Negative |
| P08818 | RPAAVAAAGGHAADRIVRLP | Negative |
| P08818 | PAAAAVLLAALTCLLLRPAA | Negative |
| P08818 | LAALTCLLLRPAAVAAAGGH | Negative |
| P08818 | TCLLLRPAAVAAAGGHAADR | Negative |
| P08818 | PAPAAAAVLLAALTCLLLRP | Negative |
| P08818 | RRLPPAPAAAAVLLAALTCL | Negative |
| P08818 | LRPAAVAAAGGHAADRIVRL | Negative |
| P08818 | AAAVLLAALTCLLLRPAAVA | Negative |
| P08818 | AAVLLAALTCLLLRPAAVAA | Negative |
| P08818 | CLLLRPAAVAAAGGHAADRI | Negative |
| P08818 | PAAVAAAGGHAADRIVRLPG | Negative |
| P08818 | AAAAVLLAALTCLLLRPAAV | Negative |
| P08818 | TTTRRLPPAPAAAAVLLAAL | Negative |
| P08818 | TRRLPPAPAAAAVLLAALTC | Negative |
| P08818 | LLRPAAVAAAGGHAADRIV  | Negative |
| P08818 | AVLLAALTCLLLRPAAVAAA | Negative |
| P08818 | APAAAAVLLAALTCLLLRPA | Negative |
| P08818 | RLPPAPAAAAVLLAALTCLL | Negative |
| P08818 | ALTCLLLRPAAVAAAGGHAA | Negative |
| P08818 | MRTTTRRLPPAPAAAAVLLA | Negative |
| P08818 | PPAPAAAAVLLAALTCLLLR | Negative |
| P08818 | VLLAALTCLLLRPAAVAAAG | Negative |
| P08818 | LLAALTCLLLRPAAVAAAGG | Negative |
| P08833 | LLTVQVGVTAGAPWQCAPCS | Negative |
| P08833 | LTVQVGVTAGAPWQCAPCSA | Negative |
| P08833 | WQCAPCSAEKLALCPPVSAS | Negative |
| P08833 | VTAGAPWQCAPCSAEKLALC | Negative |
| P08833 | LLLLTVQVGVTAGAPWQCAP | Negative |
| P08833 | TVQVGVTAGAPWQCAPCSAE | Negative |
| P08833 | APWQCAPCSAEKLALCPPVS | Negative |
| P08833 | QVGVTAGAPWQCAPCSAEKL | Negative |
| P08833 | TAGAPWQCAPCSAEKLALCP | Negative |

|        |                      |          |
|--------|----------------------|----------|
| P08833 | LLLTVQVGVTAGAPWQCAPC | Negative |
| P08833 | GVTAGAPWQCAPCSAEKLAL | Negative |
| P08833 | PWQCAPCSAEKLALCPPVSA | Negative |
| P08833 | WLVLLLLTVQVGVTAGAPWQ | Negative |
| P08833 | VPVARVWLVLLLLTVQVGVT | Negative |
| P08833 | EVPVARVWLVLLLLTVQGVV | Negative |
| P08833 | GAPWQCAPCSAEKLALCPPV | Negative |
| P08833 | MSEVPVARVWLVLLLLTVQV | Negative |
| P08833 | RVWLVLLLLTVQVGVTAGAP | Negative |
| P08833 | VARVWLVLLLLTVQVGVTAG | Negative |
| P08833 | ARVWLVLLLLTVQVGVTAGA | Negative |
| P08833 | VQVGVTAGAPWQCAPCSAEK | Negative |
| P08833 | AGAPWQCAPCSAEKLALCPP | Negative |
| P08833 | CAPCSAEKLALCPPVSASCS | Negative |
| P08833 | QCAPCSAEKLALCPPVSASC | Negative |
| P08833 | VGVTAGAPWQCAPCSAEKLA | Negative |
| P08833 | VLLLLTVQVGVTAGAPWQCA | Negative |
| P08833 | VWLVLLLLTVQVGVTAGAPW | Negative |
| P08833 | SEVPVARVWLVLLLLTVQVG | Negative |
| P08833 | PVARVWLVLLLLTVQVGVT  | Negative |
| P08878 | LWIVAVLLVGVEGSLVEFET | Negative |
| P08878 | MRALWIVAVLLVGVEGSLVE | Negative |
| P08878 | ALWIVAVLLVGVEGSLVEFE | Negative |
| P08878 | LVEFETLMMKIAGRSGISYY | Negative |
| P08878 | VLLVGVEGSLVEFETLMMKI | Negative |
| P08878 | GSLVEFETLMMKIAGRSGIS | Negative |
| P08878 | AGRSGISYYSSYGCYCGAGG | Negative |
| P08878 | GVEGSLVEFETLMMKIAGRS | Negative |
| P08878 | MMKIAGRSGISYYSSYGCYC | Negative |
| P08878 | AVLLVGVEGSLVEFETLMMK | Negative |
| P08878 | VEFETLMMKIAGRSGISYYS | Negative |
| P08878 | EGSLVEFETLMMKIAGRSGI | Negative |
| P08878 | ETLMMKIAGRSGISYYSSYG | Negative |
| P08878 | IVAVLLVGVEGSLVEFETLM | Negative |
| P08878 | RALWIVAVLLVGVEGSLVEF | Negative |
| P08878 | LLVGVEGSLVEFETLMMKIA | Negative |
| P08878 | SLVEFETLMMKIAGRSGISY | Negative |
| P08878 | VEGSLVEFETLMMKIAGRS  | Negative |
| P08878 | IAGRSGISYYSSYGCYCGAG | Negative |
| P08878 | LVGVEGSLVEFETLMMKIAG | Negative |
| P08878 | EFETLMMKIAGRSGISYYSS | Negative |
| P08878 | KIAGRSGISYYSSYGCYCGA | Negative |
| P08878 | LMMKIAGRSGISYYSSYGCY | Negative |
| P08878 | FETLMMKIAGRSGISYYSSY | Negative |
| P08878 | WIVAVLLVGVEGSLVEFETL | Negative |
| P08878 | GRSGISYYSSYGCYCGAGGQ | Negative |

|        |                      |          |
|--------|----------------------|----------|
| P08878 | VAVLLVGVEGSLVEFETLMM | Negative |
| P08878 | VGVEGSLVEFETLMMKIAGR | Negative |
| P08899 | FTSAVNRAQHLHTLAAEIYK | Negative |
| P08899 | NLFTSAVNRAQHLHTLAAEI | Negative |
| P08899 | WPVLLVSFSVNAVEPISLYN | Negative |
| P08899 | FSVNAVEPISLYNLFTSAVN | Negative |
| P08899 | VEPISLYNLFTSAVNRAQHL | Negative |
| P08899 | YNLFTSAVNRAQHLHTLAAE | Negative |
| P08899 | PISLYNLFTSAVNRAQHLHT | Negative |
| P08899 | SFSVNAVEPISLYNLFTSAV | Negative |
| P08899 | LLWPVLLVSFSVNAVEPISL | Negative |
| P08899 | MASGFLLPVLLVSFSVNAV  | Negative |
| P08899 | ASGFLLPVLLVSFSVNAVE  | Negative |
| P08899 | SGFLLPVLLVSFSVNAVEP  | Negative |
| P08899 | LWPVLLVSFSVNAVEPISLY | Negative |
| P08899 | LLVSFSVNAVEPISLYNLFT | Negative |
| P08899 | ISLYNLFTSAVNRAQHLHTL | Negative |
| P08899 | LVSFSVNAVEPISLYNLFTS | Negative |
| P08899 | AVEPISLYNLFTSAVNRAQH | Negative |
| P08899 | VNAVEPISLYNLFTSAVNRA | Negative |
| P08899 | LYNLFTSAVNRAQHLHTLAA | Negative |
| P08899 | LFTSAVNRAQHLHTLAAEIY | Negative |
| P08899 | GFLLPVLLVSFSVNAVEPI  | Negative |
| P08899 | TSAVNRAQHLHTLAAEIYKE | Negative |
| P08899 | NAVEPISLYNLFTSAVNRAQ | Negative |
| P08899 | SVNAVEPISLYNLFTSAVNR | Negative |
| P08899 | EPISLYNLFTSAVNRAQHLH | Negative |
| P08899 | VLLVSFSVNAVEPISLYNLF | Negative |
| P08899 | PVLLVSFSVNAVEPISLYNL | Negative |
| P08899 | SLYNLFTSAVNRAQHLHTLA | Negative |
| P08899 | VSFSVNAVEPISLYNLFTSA | Negative |
| P08904 | LLGMWWSVRPLCAVPKGLTK | Negative |
| P08904 | MWWSVRPLCAVPKGLTKARW | Negative |
| P08904 | WSVRPLCAVPKGLTKARWFE | Negative |
| P08904 | GPHLLGRSSLLLLLLGMWWS | Negative |
| P08904 | RSSLLLLLLGMWWSVRPLCA | Negative |
| P08904 | GMWWSVRPLCAVPKGLTKAR | Negative |
| P08904 | PLCAVPKGLTKARWFEIQHI | Negative |
| P08904 | VRPLCAVPKGLTKARWFEIQ | Negative |
| P08904 | PHLLGRSSLLLLLLGMWWSV | Negative |
| P08904 | LLLLLLGMWWSVRPLCAVPK | Negative |
| P08904 | WWSVRPLCAVPKGLTKARWF | Negative |
| P08904 | SSLLLLLLGMWWSVRPLCAV | Negative |
| P08904 | LLGMWWSVRPLCAVPKGLT  | Negative |
| P08904 | AVPKGLTKARWFEIQHIQPR | Negative |
| P08904 | SLLLLLLGMWWSVRPLCAVP | Negative |

|        |                       |          |
|--------|-----------------------|----------|
| P08904 | SVRPLCAVPKGLTKARWFEI  | Negative |
| P08904 | RPLCAVPKGLTKARWFEIQH  | Negative |
| P08904 | VPKGLTKARWFEIQHIQPRLL | Negative |
| P08904 | LLLLLGMWWSVRPLCAVPKG  | Negative |
| P08904 | CAVPKGLTKARWFEIQHIQP  | Negative |
| P08904 | MGPLLLGRSSLLLLLLGMWW  | Negative |
| P08904 | PKGLTKARWFEIQHIQPRLL  | Negative |
| P08904 | LLGRSSLLLLLLGMWWSVRP  | Negative |
| P08904 | LGMWWSVRPLCAVPKGLTKA  | Negative |
| P08904 | GRSSLLLLLLGMWWSVRPLC  | Negative |
| P08904 | KGLTKARWFEIQHIQPRLLQ  | Negative |
| P08904 | HLLGRSSLLLLLLGMWWSVR  | Negative |
| P08904 | LCAVPKGLTKARWFEIQHIQ  | Negative |
| P08904 | LGRSSLLLLLLGMWWSVRPL  | Negative |
| P08905 | KVYERCEFARTLKRNGMAGY  | Negative |
| P08905 | TLGLLLLSVTAQAKVYERCE  | Negative |
| P08905 | EFARTLKRNGMAGYYGVSLA  | Negative |
| P08905 | LLSVTAQAKVYERCEFART   | Negative |
| P08905 | FARTLKRNGMAGYYGVSLAD  | Negative |
| P08905 | LSVTAQAKVYERCEFARTLK  | Negative |
| P08905 | LLLLSVTAQAKVYERCEFAR  | Negative |
| P08905 | ARTLKRNGMAGYYGVSLADW  | Negative |
| P08905 | VYERCEFARTLKRNGMAGYY  | Negative |
| P08905 | MKTLLTLGLLLLSVTAQAKV  | Negative |
| P08905 | SVTAQAKVYERCEFARTLKR  | Negative |
| P08905 | TAQAKVYERCEFARTLKRNG  | Negative |
| P08905 | LLSVTAQAKVYERCEFARTL  | Negative |
| P08905 | TLKRNGMAGYYGVSLADWVC  | Negative |
| P08905 | LKRNGMAGYYGVSLADWVCL  | Negative |
| P08905 | QAKVYERCEFARTLKRNGMA  | Negative |
| P08905 | GLLLSVTAQAKVYERCEFA   | Negative |
| P08905 | LGLLLSVTAQAKVYERCEF   | Negative |
| P08905 | VTQAKVYERCEFARTLKRN   | Negative |
| P08905 | LTLGLLLSVTAQAKVYERC   | Negative |
| P08905 | AQAKVYERCEFARTLKRNGM  | Negative |
| P08905 | YERCEFARTLKRNGMAGYYG  | Negative |
| P08905 | CEFARTLKRNGMAGYYGVSL  | Negative |
| P08905 | ERCEFARTLKRNGMAGYYGV  | Negative |
| P08905 | AKVYERCEFARTLKRNGMAG  | Negative |
| P08905 | RCEFARTLKRNGMAGYYGVS  | Negative |
| P08905 | RTLKRNGMAGYYGVSLADWV  | Negative |
| P08905 | TLLTLGLLLSVTAQAKVYE   | Negative |
| P08905 | KTLLTLGLLLSVTAQAKVY   | Negative |
| P09056 | TPVNATCAIRHPCHGNLMNQ  | Negative |
| P09056 | GAGSPLPITPVNATCAIRHP  | Negative |
| P09056 | LLVLHWKHGAGSPLPITPV   | Negative |

|        |                      |          |
|--------|----------------------|----------|
| P09056 | PLPITPVNATCAIRHPCHGN | Negative |
| P09056 | PITPVNATCAIRHPCHGNLM | Negative |
| P09056 | KVLAAGIVPLLLLVLHWKHG | Negative |
| P09056 | HWKHGAGSPLPITPVNATCA | Negative |
| P09056 | LAAGIVPLLLLVLHWKHGAG | Negative |
| P09056 | AGIVPLLLLVLHWKHGAGSP | Negative |
| P09056 | MKVLAAGIVPLLLLVLHWKH | Negative |
| P09056 | LLVLHWKHGAGSPLPITPVN | Negative |
| P09056 | LVLHWKHGAGSPLPITPVNA | Negative |
| P09056 | LHWKHGAGSPLPITPVNATC | Negative |
| P09056 | VLHWKHGAGSPLPITPVNAT | Negative |
| P09056 | GSPLPITPVNATCAIRHPCH | Negative |
| P09056 | PVNATCAIRHPCHGNLMNQI | Negative |
| P09056 | AGSPLPITPVNATCAIRHPC | Negative |
| P09056 | HGAGSPLPITPVNATCAIRH | Negative |
| P09056 | VLAAGIVPLLLLVLHWKHGA | Negative |
| P09056 | LPITPVNATCAIRHPCHGNL | Negative |
| P09056 | WKHGAGSPLPITPVNATCAI | Negative |
| P09056 | PLLLLVLHWKHGAGSPLPIT | Negative |
| P09056 | AAGIVPLLLLVLHWKHGAGS | Negative |
| P09056 | SPLPITPVNATCAIRHPCHG | Negative |
| P09056 | LLLLVLHWKHGAGSPLPITP | Negative |
| P09056 | KHGAGSPLPITPVNATCAIR | Negative |
| P09056 | ITPVNATCAIRHPCHGNLMN | Negative |
| P09056 | GIVPLLLLVLHWKHGAGSPL | Negative |
| P09056 | IVPLLLLVLHWKHGAGSPLP | Negative |
| P09102 | EEDGVLVLRAANFEQALAAH | Negative |
| P09102 | GLAEPLLEEDGVLVLRAANF | Negative |
| P09102 | AALGLAEPLLEEDGVLVLRA | Negative |
| P09102 | LAEPLLEEDGVLVLRAANFE | Negative |
| P09102 | ALGLAEPLLEEDGVLVLRAA | Negative |
| P09102 | EEEDGVLVLRAANFEQALAA | Negative |
| P09102 | CLVAALGLAEPLLEEDGVLV | Negative |
| P09102 | RAIVALLCLVAALGLAEPLE | Negative |
| P09102 | AVVRVRAIVALLCLVAALGL | Negative |
| P09102 | VVRVRAIVALLCLVAALGLA | Negative |
| P09102 | PLEEEDGVLVLRAANFEQAL | Negative |
| P09102 | DGVLVLRAANFEQALAAHRH | Negative |
| P09102 | VALLCLVAALGLAEPLLEED | Negative |
| P09102 | EDGVLVLRAANFEQALAAHR | Negative |
| P09102 | ALLCLVAALGLAEPLLEEDG | Negative |
| P09102 | LVAALGLAEPLLEEDGVLVL | Negative |
| P09102 | GVLVLRAANFEQALAAHRHL | Negative |
| P09102 | VRVRAIVALLCLVAALGLAE | Negative |
| P09102 | RVRAIVALLCLVAALGLAEP | Negative |
| P09102 | EPLLEEDGVLVLRAANFEQA | Negative |

|        |                        |          |
|--------|------------------------|----------|
| P09102 | LCLVAALGLAEPLLEEDGVL   | Negative |
| P09102 | IVALLCLVAALGLAEPLLEE   | Negative |
| P09102 | VAALGLAEPLLEEDGVLVLR   | Negative |
| P09102 | AEPLEEDGVLVLRAANFEQ    | Negative |
| P09102 | MAVVRVRAIVALLCLVAALG   | Negative |
| P09102 | LGLAEPLLEEDGVLVLRAAN   | Negative |
| P09102 | LLCLVAALGLAEPLLEEDGV   | Negative |
| P09102 | LEEEDGVLVLRAANFEQALA   | Negative |
| P09102 | VRAIVALLCLVAALGLAEPL   | Negative |
| P09121 | SLTLGLLSPVHAAPDTSVSN   | Negative |
| P09121 | DTSVSNKQNFSTDVIYQIFT   | Negative |
| P09121 | TLGLLSPVHAAPDTSVSNKQ   | Negative |
| P09121 | LGLLSPVHAAPDTSVSNKQN   | Negative |
| P09121 | KLTA VWT LWLSLTLGLLSPV | Negative |
| P09121 | LTAVWTLWLSLTLGLLSPVH   | Negative |
| P09121 | HAAPDTSVSNKQNFSTDVIY   | Negative |
| P09121 | LSLTLGLLSPVHAAPDTSVS   | Negative |
| P09121 | MKRFMKLTA VWT LWLSLTLG | Negative |
| P09121 | RFMKLTA VWT LWLSLTLGLL | Negative |
| P09121 | VHAAPDTSVSNKQNFSTDVI   | Negative |
| P09121 | TLWLSLTLGLLSPVHAAPDT   | Negative |
| P09121 | LSPVHAAPDTSVSNKQNFST   | Negative |
| P09121 | MKLTA VWT LWLSLTLGLLSP | Negative |
| P09121 | TAVWTLWLSLTLGLLSPVHA   | Negative |
| P09121 | AVWTLWLSLTLGLLSPVHAA   | Negative |
| P09121 | LLSPVHAAPDTSVSNKQNFS   | Negative |
| P09121 | LTGLLSPVHAAPDTSVSNK    | Negative |
| P09121 | PDTSVSNKQNFSTDVIYQIF   | Negative |
| P09121 | WTLWLSLTLGLLSPVHAAPD   | Negative |
| P09121 | FMKLTA VWT LWLSLTLGLLS | Negative |
| P09121 | PVHAAPDTSVSNKQNFSTDV   | Negative |
| P09121 | SPVHAAPDTSVSNKQNFSTD   | Negative |
| P09121 | VWTLWLSLTLGLLSPVHAAP   | Negative |
| P09121 | APDTSVSNKQNFSTDVIYQI   | Negative |
| P09121 | GLLSPVHAAPDTSVSNKQNF   | Negative |
| P09121 | KRFMKLTA VWT LWLSLTLGL | Negative |
| P09121 | WLSLTLGLLSPVHAAPDTSV   | Negative |
| P09121 | AAPDTSVSNKQNFSTDVIYQ   | Negative |
| P09228 | IEGGIYDADLNDERVQRALH   | Negative |
| P09228 | SPQEEDRIIEGGIYDADLND   | Negative |
| P09228 | QEEDRIIEGGIYDADLNDER   | Negative |
| P09228 | LLLLLATQAVALAWSPQEED   | Negative |
| P09228 | TLLLLLATQAVALAWSPQEE   | Negative |
| P09228 | EDRIIEGGIYDADLNDERVQ   | Negative |
| P09228 | LLATQAVALAWSPQEEDRII   | Negative |
| P09228 | RIIEGGIYDADLNDERVQRA   | Negative |

|        |                       |          |
|--------|-----------------------|----------|
| P09228 | LLLATQAVALAWSPQEEDRI  | Negative |
| P09228 | LATQAVALAWSPQEEDRIIE  | Negative |
| P09228 | PQEEDRIIEGGIYDADLNDE  | Negative |
| P09228 | AWSPQEEDRIIEGGIYDADL  | Negative |
| P09228 | TQAVALAWSPQEEDRIIEGG  | Negative |
| P09228 | LLLLLATQAVALAWSPQEEDR | Negative |
| P09228 | ALAWSPQEEDRIIEGGIYDA  | Negative |
| P09228 | MAWPLCTLLLLLATQAVALA  | Negative |
| P09228 | PLCTLLLLLATQAVALAWSP  | Negative |
| P09228 | LAWSPQEEDRIIEGGIYDAD  | Negative |
| P09228 | IIEGGIYDADLNDERVQRAL  | Negative |
| P09228 | WPLCTLLLLLATQAVALAWS  | Negative |
| P09228 | LCTLLLLLATQAVALAWSPQ  | Negative |
| P09228 | AVALAWSPQEEDRIIEGGIY  | Negative |
| P09228 | ATQAVALAWSPQEEDRIIEG  | Negative |
| P09228 | WSPQEEDRIIEGGIYDADLN  | Negative |
| P09228 | VALAWSPQEEDRIIEGGIYD  | Negative |
| P09228 | AWPLCTLLLLLATQAVALAW  | Negative |
| P09228 | EEDRIIEGGIYDADLNDERV  | Negative |
| P09228 | QAVALAWSPQEEDRIIEGGI  | Negative |
| P09228 | DRIIEGGIYDADLNDERVQR  | Negative |
| P09237 | PGSLALPLPQEAGGMSELQW  | Negative |
| P09237 | VCLLPGSLALPLPQEAGGMS  | Negative |
| P09237 | AVCLLPGSLALPLPQEAGGM  | Negative |
| P09237 | TVLCAVCLLPGSLALPLPQE  | Negative |
| P09237 | CAVCLLPGSLALPLPQEAGG  | Negative |
| P09237 | MRLTVLCAVCLLPGSLALPL  | Negative |
| P09237 | MSELQWEQAQDYLYKRFYLYD | Negative |
| P09237 | PQEAGGMSELQWEQAQDYLYK | Negative |
| P09237 | LLPGSLALPLPQEAGGMSEL  | Negative |
| P09237 | LCAVCLLPGSLALPLPQEAG  | Negative |
| P09237 | LQWEQAQDYLYKRFYLYDSET | Negative |
| P09237 | QEAGGMSELQWEQAQDYLYKR | Negative |
| P09237 | LPLPQEAGGMSELQWEQAQD  | Negative |
| P09237 | ALPLPQEAGGMSELQWEQAQ  | Negative |
| P09237 | CLLPGSLALPLPQEAGGMSE  | Negative |
| P09237 | EAGGMSELQWEQAQDYLYKRF | Negative |
| P09237 | GGMSELQWEQAQDYLYKRFYL | Negative |
| P09237 | VLCVCLLPGSLALPLPQEA   | Negative |
| P09237 | AGGMSELQWEQAQDYLYKRFY | Negative |
| P09237 | PLPQEAGGMSELQWEQAQDY  | Negative |
| P09237 | GSLALPLPQEAGGMSELQWE  | Negative |
| P09237 | SELQWEQAQDYLYKRFYLYDS | Negative |
| P09237 | SLALPLPQEAGGMSELQWEQ  | Negative |
| P09237 | GMSELQWEQAQDYLYKRFYLY | Negative |
| P09237 | ELQWEQAQDYLYKRFYLYDSE | Negative |

|        |                      |          |
|--------|----------------------|----------|
| P09237 | LALPLPQEAGGMSELQWEQA | Negative |
| P09237 | RLTVLCAVCLLPGLALPLP  | Negative |
| P09237 | LPQEAGGMSELQWEQAQDYL | Negative |
| P09237 | LPGSLALPLPQEAGGMSELQ | Negative |
| P09318 | VPINDLIYRASQQSDKLHAL | Negative |
| P09318 | GSNLMMVLCVVAMCRAVPIN | Negative |
| P09318 | LIYRASQQSDKLHALSSMLT | Negative |
| P09318 | RRISGSNLMMVLCVVAMCRA | Negative |
| P09318 | IYRASQQSDKLHALSSMLTQ | Negative |
| P09318 | LCVVAMCRAVPINDLIYRAS | Negative |
| P09318 | VLCVVAMCRAVPINDLIYRA | Negative |
| P09318 | RISGSNLMMVLCVVAMCRAV | Negative |
| P09318 | MCRAVPINDLIYRASQQSDK | Negative |
| P09318 | VVAMCRAVPINDLIYRASQQ | Negative |
| P09318 | RQRRISGSNLMMVLCVVAMC | Negative |
| P09318 | NDLIYRASQQSDKLHALSSM | Negative |
| P09318 | SGSNLMMVLCVVAMCRAVPI | Negative |
| P09318 | CVVAMCRAVPINDLIYRASQ | Negative |
| P09318 | NLMMVLCVVAMCRAVPINDL | Negative |
| P09318 | VAMCRAVPINDLIYRASQQS | Negative |
| P09318 | MMVLCVVAMCRAVPINDLIY | Negative |
| P09318 | CRAVPINDLIYRASQQSDKL | Negative |
| P09318 | RAVPINDLIYRASQQSDKLH | Negative |
| P09318 | MVLCVVAMCRAVPINDLIYR | Negative |
| P09318 | QRRISGSNLMMVLCVVAMCR | Negative |
| P09318 | DLIYRASQQSDKLHALSSML | Negative |
| P09318 | LMMVLCVVAMCRAVPINDLI | Negative |
| P09318 | MRQRRISGSNLMMVLCVVAM | Negative |
| P09318 | AVPINDLIYRASQQSDKLHA | Negative |
| P09318 | INDLIYRASQQSDKLHALSS | Negative |
| P09318 | AMCRAVPINDLIYRASQQSD | Negative |
| P09318 | ISGSNLMMVLCVVAMCRAVP | Negative |
| P09318 | PINDLIYRASQQSDKLHALS | Negative |
| P09319 | MTVLCVVAMCRAVPINELFE | Negative |
| P09319 | VLCVVAMCRAVPINELFERA | Negative |
| P09319 | RAVPINELFERASQHSDKLH | Negative |
| P09319 | MAQRRTSGTNLFMTVLCVVA | Negative |
| P09319 | LCVVAMCRAVPINELFERAS | Negative |
| P09319 | LFERASQHSDKLHSLSTTLT | Negative |
| P09319 | VVAMCRAVPINELFERASQH | Negative |
| P09319 | QRRTSGTNLFMTVLCVVAMC | Negative |
| P09319 | PINELFERASQHSDKLHSLS | Negative |
| P09319 | AQRRTSGTNLFMTVLCVVAM | Negative |
| P09319 | VAMCRAVPINELFERASQHS | Negative |
| P09319 | LFMTVLCVVAMCRAVPINEL | Negative |
| P09319 | ELFERASQHSDKLHSLSTTL | Negative |



|        |                      |          |
|--------|----------------------|----------|
| P09319 | GTNLFMTVLCVVAMCRAVPI | Negative |
| P09319 | MCRAVPINELFERASQHSDK | Negative |
| P09319 | FMTVLCVVAMCRAVPINELF | Negative |
| P09319 | RRTSGTNLFMTVLCVVAMCR | Negative |
| P09319 | VPINELFERASQHSDKLHSL | Negative |
| P09319 | NELFERASQHSDKLHSLSTT | Negative |
| P09319 | CVVAMCRAVPINELFERASQ | Negative |
| P09319 | AVPINELFERASQHSDKLHS | Negative |
| P09319 | RTSGTNLFMTVLCVVAMCRA | Negative |
| P09319 | TVLCVVAMCRAVPINELFER | Negative |
| P09319 | SGTNLFMTVLCVVAMCRAVP | Negative |
| P09319 | TSGTNLFMTVLCVVAMCRAV | Negative |
| P09319 | AMCRAVPINELFERASQHSD | Negative |
| P09319 | INELFERASQHSDKLHSLST | Negative |
| P09319 | CRAVPINELFERASQHSDKL | Negative |
| P09319 | TNLFMTVLCVVAMCRAVPIN | Negative |
| P09333 | NKKVVLSTTLVASVAAS    | Negative |
| P09333 | AAPKDIYIGGNIKKYYSTD  | Negative |
| P09333 | GIYIGGNIKKYYSTDVLFEM | Negative |
| P09333 | TTLVASVAASAFAAPKDIY  | Negative |
| P09333 | MNKKVVLSTTLVASVAA    | Negative |
| P09333 | DGIYIGGNIKKYYSTDVLF  | Negative |
| P09333 | SAFAAPKDIYIGGNIKKYY  | Negative |
| P09333 | LSVLSTTLVASVAASAFAAP | Negative |
| P09333 | VAASAFAAPKDIYIGGNIK  | Negative |
| P09333 | SVAASAFAAPKDIYIGGNI  | Negative |
| P09333 | VVLSTTLVASVAASAFA    | Negative |
| P09333 | STTLVASVAASAFAAPKDI  | Negative |
| P09333 | KVVLSTTLVASVAASAF    | Negative |
| P09333 | ASVAASAFAAPKDIYIGGN  | Negative |
| P09333 | IYIGGNIKKYYSTDVLFEMT | Negative |
| P09333 | PKDIYIGGNIKKYYSTDVL  | Negative |
| P09333 | VLSTTLVASVAASAFAAPKD | Negative |
| P09333 | SVLSTTLVASVAASAFAAPK | Negative |
| P09333 | APKDIYIGGNIKKYYSTDV  | Negative |
| P09333 | ASAFAAPKDIYIGGNIKKY  | Negative |
| P09333 | LVASVAASAFAAPKDIYIG  | Negative |
| P09333 | FAAPKDIYIGGNIKKYYST  | Negative |
| P09333 | KKVVLSTTLVASVAASA    | Negative |
| P09333 | KDIYIGGNIKKYYSTDVLF  | Negative |
| P09333 | AFAAPKDIYIGGNIKKYYS  | Negative |
| P09333 | VASVAASAFAAPKDIYIGG  | Negative |
| P09333 | AASAFAAPKDIYIGGNIKK  | Negative |
| P09333 | VLSVLSTTLVASVAASAFAA | Negative |
| P09333 | TLVASVAASAFAAPKDIYI  | Negative |
| P09341 | APSNPRLLRVALLLLLVAA  | Negative |

|        |                      |          |
|--------|----------------------|----------|
| P09341 | PSNPRLLRVALLLLLVAAG  | Negative |
| P09341 | LLRVALLLLLVAAGRRAAG  | Negative |
| P09341 | VALLLLLVAAGRRAAGASV  | Negative |
| P09341 | LLLVAAGRRAAGASVATEL  | Negative |
| P09341 | GRRAAGASVATELRCQCLQT | Negative |
| P09341 | PRLLRVALLLLLVAAGRRA  | Negative |
| P09341 | LLLVAAGRRAAGASVATELR | Negative |
| P09341 | RAALSAAPSNPRLLRVALLL | Negative |
| P09341 | ARAALSAAPSNPRLLRVALL | Negative |
| P09341 | RLLRVALLLLLVAAGRRAA  | Negative |
| P09341 | ALLLLLVAAGRRAAGASVA  | Negative |
| P09341 | LVAAGRRAAGASVATELRCQ | Negative |
| P09341 | LRVALLLLLVAAGRRAAGA  | Negative |
| P09341 | ALSAAPSNPRLLRVALLLLL | Negative |
| P09341 | LLVAAGRRAAGASVATELRC | Negative |
| P09341 | SAAPSNPRLLRVALLLLLVL | Negative |
| P09341 | RVALLLLLVAAGRRAAGAS  | Negative |
| P09341 | RRAAGASVATELRCQCLQTL | Negative |
| P09341 | MARAALSAAPSNPRLLRVAL | Negative |
| P09341 | AALSAAPSNPRLLRVALLLL | Negative |
| P09341 | AAPSNPRLLRVALLLLLVA  | Negative |
| P09341 | AGRRAAGASVATELRCQCLQ | Negative |
| P09341 | LSAAPSNPRLLRVALLLLL  | Negative |
| P09341 | AAGRRAAGASVATELRCQCL | Negative |
| P09341 | NPRLLRVALLLLLVAAGR   | Negative |
| P09341 | LLLLVAAGRRAAGASVATE  | Negative |
| P09341 | VAAGRRAAGASVATELRCQC | Negative |
| P09341 | SNPRLLRVALLLLLVAAGR  | Negative |
| P09350 | ASEAATDYPTNPPTTPPTPA | Negative |
| P09350 | FLAASEAATDYPTNPPTTPP | Negative |
| P09350 | AASEAATDYPTNPPTTPPTP | Negative |
| P09350 | TPPTPAPTSTPLPSSAASPE | Negative |
| P09350 | LFVLFLAASEAATDYPTNPP | Negative |
| P09350 | SEAATDYPTNPPTTPPTPAP | Negative |
| P09350 | AATDYPTNPPTTPPTPAPTS | Negative |
| P09350 | LAASEAATDYPTNPPTTPPT | Negative |
| P09350 | ATDYPTNPPTTPPTPAPTST | Negative |
| P09350 | KSTFLFALFVLFLAASEAAT | Negative |
| P09350 | YPTNPPTTPPTPAPTSTPLP | Negative |
| P09350 | PTNPPTTPPTPAPTSTPLPS | Negative |
| P09350 | EAATDYPTNPPTTPPTPAPT | Negative |
| P09350 | ALFVLFLAASEAATDYPTNP | Negative |
| P09350 | TTPPTPAPTSTPLPSSAASP | Negative |
| P09350 | MKSTFLFALFVLFLAASEAA | Negative |
| P09350 | NPPTTPPTPAPTSTPLPSSA | Negative |
| P09350 | LFALFVLFLAASEAATDYPT | Negative |

|        |                       |          |
|--------|-----------------------|----------|
| P09350 | TDYPTNPPTTPPTPAPTSTP  | Negative |
| P09350 | FALFVLFLAASEAATDYPTN  | Negative |
| P09350 | STFLFALFVLFLAASEAATD  | Negative |
| P09350 | LFLAASEAATDYPTNPPTTP  | Negative |
| P09350 | PPTTPPTPAPTSTPLPSSAA  | Negative |
| P09350 | PTTPPTPAPTSTPLPSSAAS  | Negative |
| P09350 | VLFLAASEAATDYPTNPPTT  | Negative |
| P09350 | FVLFLAASEAATDYPTNPPT  | Negative |
| P09350 | TFLFALFVLFLAASEAATDY  | Negative |
| P09350 | TNPPTTPPTPAPTSTPLPSS  | Negative |
| P09350 | DYPTNPPTTPPTPAPTSTPL  | Negative |
| P09394 | KNLSMAIMMSTIVMGSSAMA  | Negative |
| P09394 | NEKIVIAHRGASGYLPEHTL  | Negative |
| P09394 | VMGSSAMAADSNEKIVIAHR  | Negative |
| P09394 | AMAADSNEKIVIAHRGASGY  | Negative |
| P09394 | STIVMGSSAMAADSNEKIVI  | Negative |
| P09394 | MAIMMSTIVMGSSAMAADSN  | Negative |
| P09394 | LSMAIMMSTIVMGSSAMAAD  | Negative |
| P09394 | MSTIVMGSSAMAADSNEKIV  | Negative |
| P09394 | TLKNLSMAIMMSTIVMGSSA  | Negative |
| P09394 | DSNEKIVIAHRGASGYLPEH  | Negative |
| P09394 | SNEKIVIAHRGASGYLPEHT  | Negative |
| P09394 | MAADSNEKIVIAHRGASGYL  | Negative |
| P09394 | ADSNEKIVIAHRGASGYLPE  | Negative |
| P09394 | LTLKNLSMAIMMSTIVMGSS  | Negative |
| P09394 | LKNLSMAIMMSTIVMGSSAM  | Negative |
| P09394 | SMAIMMSTIVMGSSAMAADS  | Negative |
| P09394 | SAMAADSNEKIVIAHRGASG  | Negative |
| P09394 | IMMSTIVMGSSAMAADSNEK  | Negative |
| P09394 | SSAMAADSNEKIVIAHRGAS  | Negative |
| P09394 | MGSSAMAADSNEKIVIAHRG  | Negative |
| P09394 | MMSTIVMGSSAMAADSNEKI  | Negative |
| P09394 | TIVMGSSAMAADSNEKIVIA  | Negative |
| P09394 | EKIVIAHRGASGYLPEHTLP  | Negative |
| P09394 | GSSAMAADSNEKIVIAHRGA  | Negative |
| P09394 | KLTLKNLSMAIMMSTIVMG   | Negative |
| P09394 | MKLTTLKNLSMAIMMSTIVMG | Negative |
| P09394 | IVMGSSAMAADSNEKIVIAH  | Negative |
| P09394 | NLSMAIMMSTIVMGSSAMAA  | Negative |
| P09394 | AADSNEKIVIAHRGASGYLP  | Negative |
| P09465 | ALVFSLAHAQDFAELQGKWY  | Negative |
| P09465 | VIAADNLEKIEEGGPLRFYF  | Negative |
| P09465 | KWYTIVIAADNLEKIEEGGP  | Negative |
| P09465 | AQDFAELQGKWYTIVIAADN  | Negative |
| P09465 | QGKWYTIVIAADNLEKIEEG  | Negative |
| P09465 | ILLALVFSLAHAQDFAELQ   | Negative |

|        |                      |          |
|--------|----------------------|----------|
| P09465 | LQGKWYTIVIAADNLEKIEE | Negative |
| P09465 | LAHAQDFAELQGKWYTIVIA | Negative |
| P09465 | ELQGKWYTIVIAADNLEKIE | Negative |
| P09465 | SLAHAQDFAELQGKWYTIVI | Negative |
| P09465 | LLLALVFSLAHAQDFAELQG | Negative |
| P09465 | TIVIAADNLEKIEEGGPLRF | Negative |
| P09465 | AHAQDFAELQGKWYTIVIAA | Negative |
| P09465 | LVFSLAHAQDFAELQGKWYT | Negative |
| P09465 | GKWYTIVIAADNLEKIEEGG | Negative |
| P09465 | WYTIVIAADNLEKIEEGGPL | Negative |
| P09465 | FSLAHAQDFAELQGKWYTIV | Negative |
| P09465 | FAELQGKWYTIVIAADNLEK | Negative |
| P09465 | IVIAADNLEKIEEGGPLRFY | Negative |
| P09465 | AELQGKWYTIVIAADNLEKI | Negative |
| P09465 | QDFAELQGKWYTIVIAADNL | Negative |
| P09465 | MVKILLALLVFSLAHAQDFA | Negative |
| P09465 | LLALVFSLAHAQDFAELQGK | Negative |
| P09465 | KILLALLVFSLAHAQDFAEL | Negative |
| P09465 | DFAELQGKWYTIVIAADNLE | Negative |
| P09465 | HAQDFAELQGKWYTIVIAAD | Negative |
| P09465 | VFSLAHAQDFAELQGKWYTI | Negative |
| P09465 | LALVFSLAHAQDFAELQGKW | Negative |
| P09465 | YTIVIAADNLEKIEEGGPLR | Negative |
| P09466 | MLCLLLTLGVALVCGVPAMD | Negative |
| P09466 | LPKLAGTWHSMAMATNNISL | Negative |
| P09466 | LTLGVALVCGVPAMDIPQTK | Negative |
| P09466 | QTKQDLELPKLAGTWHSMAM | Negative |
| P09466 | LLTLGVALVCGVPAMDIPQT | Negative |
| P09466 | CLLLTLGVALVCGVPAMDIP | Negative |
| P09466 | AMDIPQTKQDLELPKLAGTW | Negative |
| P09466 | LVCVPAMDIPQTKQDLELP  | Negative |
| P09466 | PAMDIPQTKQDLELPKLAGT | Negative |
| P09466 | TKQDLELPKLAGTWHSMAMA | Negative |
| P09466 | VALVCGVPAMDIPQTKQDLE | Negative |
| P09466 | GVPAMDIPQTKQDLELPKLA | Negative |
| P09466 | MDIPQTKQDLELPKLAGTWH | Negative |
| P09466 | ALVCGVPAMDIPQTKQDLEL | Negative |
| P09466 | CGVPAMDIPQTKQDLELPKL | Negative |
| P09466 | TLGVALVCGVPAMDIPQTKQ | Negative |
| P09466 | GVALVCGVPAMDIPQTKQDL | Negative |
| P09466 | LGVALVCGVPAMDIPQTKQD | Negative |
| P09466 | DLELPKLAGTWHSMAMATNN | Negative |
| P09466 | ELPKLAGTWHSMAMATNNIS | Negative |
| P09466 | LELPKLAGTWHSMAMATNNI | Negative |
| P09466 | LCLLLTLGVALVCGVPAMDI | Negative |
| P09466 | KQDLELPKLAGTWHSMAMAT | Negative |

|        |                         |          |
|--------|-------------------------|----------|
| P09466 | DIPQTKQDLELPKLAGTWHHS   | Negative |
| P09466 | PQTKQDLELPKLAGTWHSMASMA | Negative |
| P09466 | VPAMDIPQTKQDLELPKLAG    | Negative |
| P09466 | VCGVPAMDIPQTKQDLELPK    | Negative |
| P09466 | IPQTKQDLELPKLAGTWHSM    | Negative |
| P09466 | QDLELPKLAGTWHSMAMATN    | Negative |
| P09486 | GRALAAPQQEALPDETEVVE    | Negative |
| P09486 | LAGRALAAPQQEALPDETEV    | Negative |
| P09486 | ETEVEETVAEVTEVSVGAN     | Negative |
| P09486 | RALAAPQQEALPDETEVVEE    | Negative |
| P09486 | DETEVVEETVAEVTEVSVGA    | Negative |
| P09486 | TEVVEETVAEVTEVSVGANP    | Negative |
| P09486 | WIFFLLCLAGRALAAPQQEA    | Negative |
| P09486 | PQQEALPDETEVVEETVAEV    | Negative |
| P09486 | LAAPQQEALPDETEVVEETV    | Negative |
| P09486 | QQEALPDETEVVEETVAEVT    | Negative |
| P09486 | MRAWIFFLLCLAGRALAAPQ    | Negative |
| P09486 | AGRALAAPQQEALPDETEVV    | Negative |
| P09486 | LCLAGRALAAPQQEALPDET    | Negative |
| P09486 | VVEETVAEVTEVSVGANPVQ    | Negative |
| P09486 | RAWIFFLLCLAGRALAAPQQ    | Negative |
| P09486 | CLAGRALAAPQQEALPDETE    | Negative |
| P09486 | APQQEALPDETEVVEETVAE    | Negative |
| P09486 | ALPDETEVVEETVAEVTEVS    | Negative |
| P09486 | EALPDETEVVEETVAEVTEV    | Negative |
| P09486 | PDETEVVEETVAEVTEVSVG    | Negative |
| P09486 | ALAAPQQEALPDETEVVEET    | Negative |
| P09486 | IFFLLCLAGRALAAPQQEAL    | Negative |
| P09486 | LPDETEVVEETVAEVTEVSV    | Negative |
| P09486 | LLCLAGRALAAPQQEALPDE    | Negative |
| P09486 | QEALPDETEVVEETVAEVTE    | Negative |
| P09486 | EVVEETVAEVTEVSVGANPV    | Negative |
| P09486 | AAPQQEALPDETEVVEETVA    | Negative |
| P09486 | FLLCLAGRALAAPQQEALPD    | Negative |
| P09486 | FFLLCLAGRALAAPQQEALP    | Negative |
| P09487 | AIGTCFASSLVPEKEKDPKY    | Negative |
| P09487 | FASSLVPEKEKDPKYWRDQA    | Negative |
| P09487 | SSLVPEKEKDPKYWRDQAQQ    | Negative |
| P09487 | IGTCFASSLVPEKEKDPKYW    | Negative |
| P09487 | LAIGTCFASSLVPEKEKDPK    | Negative |
| P09487 | LVPEKEKDPKYWRDQAQQT     | Negative |
| P09487 | GTCFASSLVPEKEKDPKYWR    | Negative |
| P09487 | ASSLVPEKEKDPKYWRDQAQ    | Negative |
| P09487 | PFLLLAIGTCFASSLVPEKE    | Negative |
| P09487 | EKEKDPKYWRDQAQQT        | Negative |
| P09487 | KEKDPKYWRDQAQQT         | Negative |

|        |                       |          |
|--------|-----------------------|----------|
| P09487 | WRDQAQQTTLKNALRLQTLNT | Negative |
| P09487 | MISPFLLLAIGTCFASSLVP  | Negative |
| P09487 | FLLLAIGTCFASSLVPEKEK  | Negative |
| P09487 | SLVPEKEKDPKYWRDQAQQT  | Negative |
| P09487 | LLAIGTCFASSLVPEKEKDP  | Negative |
| P09487 | RDQAQQTTLKNALRLQTLNTN | Negative |
| P09487 | CFASSLVPEKEKDPKYWRDQ  | Negative |
| P09487 | KYWRDQAQQTTLKNALRLQTL | Negative |
| P09487 | DPKYWRDQAQQTTLKNALRLQ | Negative |
| P09487 | YWRDQAQQTTLKNALRLQTLN | Negative |
| P09487 | TCFASSLVPEKEKDPKYWRD  | Negative |
| P09487 | KDPKYWRDQAQQTTLKNALRL | Negative |
| P09487 | PEKEKDPKYWRDQAQQTTLKN | Negative |
| P09487 | PKYWRDQAQQTTLKNALRLQT | Negative |
| P09487 | LLLAIGTCFASSLVPEKEKD  | Negative |
| P09487 | ISPFLLLAIGTCFASSLVPE  | Negative |
| P09487 | EKDPKYWRDQAQQTTLKNALR | Negative |
| P09487 | VPEKEKDPKYWRDQAQQTTLK | Negative |
| P09489 | HSSLAAAYQDPGRLGAPDSWK | Negative |
| P09489 | GLSIHSSLAAAYQDPGRLGAP | Negative |
| P09489 | SLAAAYQDPGRLGAPDSWKTA | Negative |
| P09489 | AYCVFLGCYGLSIHSSLAAAY | Negative |
| P09489 | LAAAYQDPGRLGAPDSWKTAE | Negative |
| P09489 | NKRLKLAYCVFLGCYGLSIH  | Negative |
| P09489 | KLAYCVFLGCYGLSIHSSLA  | Negative |
| P09489 | MILNKRLKLAYCVFLGCYGL  | Negative |
| P09489 | LSIHSSLAAAYQDPGRLGAPD | Negative |
| P09489 | LGCYGLSIHSSLAAAYQDPGR | Negative |
| P09489 | AYQDPGRLGAPDSWKTAEFN  | Negative |
| P09489 | LNKRLKLAYCVFLGCYGLSI  | Negative |
| P09489 | IHSSLAAAYQDPGRLGAPDSW | Negative |
| P09489 | CVFLGCYGLSIHSSLAAAYQD | Negative |
| P09489 | SIHSSLAAAYQDPGRLGAPDS | Negative |
| P09489 | ILNKRLKLAYCVFLGCYGLS  | Negative |
| P09489 | YQDPGRLGAPDSWKTAEFNR  | Negative |
| P09489 | CYGLSIHSSLAAAYQDPGRLG | Negative |
| P09489 | YCVFLGCYGLSIHSSLAAAYQ | Negative |
| P09489 | RLKLAYCVFLGCYGLSIHSS  | Negative |
| P09489 | KRLKLAYCVFLGCYGLSIHS  | Negative |
| P09489 | LKLAYCVFLGCYGLSIHSSL  | Negative |
| P09489 | AAAYQDPGRLGAPDSWKTAEF | Negative |
| P09489 | QDPGRLGAPDSWKTAEFNRQ  | Negative |
| P09489 | LAYCVFLGCYGLSIHSSLAA  | Negative |
| P09489 | YGLSIHSSLAAAYQDPGRLGA | Negative |
| P09489 | SSLAAYQDPGRLGAPDSWKT  | Negative |
| P09489 | FLGCYGLSIHSSLAAAYQDPG | Negative |

|        |                       |          |
|--------|-----------------------|----------|
| P09489 | GCYGLSIHSSLAAYQDPGRL  | Negative |
| P09545 | ILSAISSPTLLANINEPSGE  | Negative |
| P09545 | TILSAISSPTLLANINEPSG  | Negative |
| P09545 | KLNRCAIAIFTILSAISSPT  | Negative |
| P09545 | NINEPSGEAADIISQVADSH  | Negative |
| P09545 | LNRCIAIAIFTILSAISSPTL | Negative |
| P09545 | NEPSGEAADIISQVADSHAI  | Negative |
| P09545 | ISSPTLLANINEPSGEAADI  | Negative |
| P09545 | NRCAIAIFTILSAISSPTLL  | Negative |
| P09545 | EPSGEAADIISQVADSHAIK  | Negative |
| P09545 | TLLANINEPSGEAADIISQV  | Negative |
| P09545 | INEPSGEAADIISQVADSHA  | Negative |
| P09545 | IAIFTILSAISSPTLLANIN  | Negative |
| P09545 | AIAIFTILSAISSPTLLANI  | Negative |
| P09545 | SSPTLLANINEPSGEAADII  | Negative |
| P09545 | MPKLNRCIAIAIFTILSAISS | Negative |
| P09545 | AISSPTLLANINEPSGEAAD  | Negative |
| P09545 | PTLLANINEPSGEAADIISQ  | Negative |
| P09545 | FTILSAISSPTLLANINEPS  | Negative |
| P09545 | ANINEPSGEAADIISQVADS  | Negative |
| P09545 | PKLNRCIAIAIFTILSAISSP | Negative |
| P09545 | AIFTILSAISSPTLLANINE  | Negative |
| P09545 | LLANINEPSGEAADIISQVA  | Negative |
| P09545 | LSAISSPTLLANINEPSGEA  | Negative |
| P09545 | RCAIAIFTILSAISSPTLLA  | Negative |
| P09545 | LANINEPSGEAADIISQVAD  | Negative |
| P09545 | CAIAIFTILSAISSPTLLAN  | Negative |
| P09545 | SAISSPTLLANINEPSGEAA  | Negative |
| P09545 | SPTLLANINEPSGEAADIIS  | Negative |
| P09545 | PSGEAADIISQVADSHAIKY  | Negative |
| P09551 | LALSLLVGLSTAASSYAALP  | Negative |
| P09551 | SSYAALPETVRIGTDTTYAP  | Negative |
| P09551 | AALPETVRIGTDTTYAPFSS  | Negative |
| P09551 | TAASSYAALPETVRIGTDTT  | Negative |
| P09551 | LLVGLSTAASSYAALPETVR  | Negative |
| P09551 | MKKSILALSLLVGLSTAASS  | Negative |
| P09551 | AASSYAALPETVRIGTDTTY  | Negative |
| P09551 | RIGTDTTYAPFSSKDAKGDF  | Negative |
| P09551 | ASSYAALPETVRIGTDTTYA  | Negative |
| P09551 | KKSILALSLLVGLSTAASSY  | Negative |
| P09551 | ILALSLLVGLSTAASSYAAL  | Negative |
| P09551 | ETVRIGTDTTYAPFSSKDAK  | Negative |
| P09551 | ALSLLVGLSTAASSYAALPE  | Negative |
| P09551 | LPETVRIGTDTTYAPFSSKD  | Negative |
| P09551 | SYAALPETVRIGTDTTYAPF  | Negative |
| P09551 | SLLVGLSTAASSYAALPETV  | Negative |

|        |                      |          |
|--------|----------------------|----------|
| P09551 | GLSTAASSYAALPETVRIGT | Negative |
| P09551 | TVRIGTDTTYAPFSSKDAKG | Negative |
| P09551 | STAASSYAALPETVRIGTDT | Negative |
| P09551 | LVGLSTAASSYAALPETVRI | Negative |
| P09551 | IGTDTTYAPFSSKDAKGDFV | Negative |
| P09551 | YAALPETVRIGTDTTYAPFS | Negative |
| P09551 | SILALSLLVGLSTAASSYAA | Negative |
| P09551 | ALPETVRIGTDTTYAPFSSK | Negative |
| P09551 | LSTAASSYAALPETVRIGTD | Negative |
| P09551 | KSILALSLLVGLSTAASSYA | Negative |
| P09551 | PETVRIGTDTTYAPFSSKDA | Negative |
| P09551 | VRIGTDTTYAPFSSKDAKGD | Negative |
| P09551 | VGLSTAASSYAALPETVRIG | Negative |
| P09585 | SINGVGLNDLLERASQLSDK | Negative |
| P09585 | LYFAVTVLMCAFVSINGVGL | Negative |
| P09585 | TQGSRLYFAVTVLMCAFVSI | Negative |
| P09585 | SRLYFAVTVLMCAFVSINGV | Negative |
| P09585 | RLYFAVTVLMCAFVSINGVG | Negative |
| P09585 | VLMCAFVSINGVGLNDLLER | Negative |
| P09585 | GLNDLLERASQLSDKLHSL  | Negative |
| P09585 | MCAFVSINGVGLNDLLERAS | Negative |
| P09585 | LNDLLERASQLSDKLHSLST | Negative |
| P09585 | LMCAFVSINGVGLNDLLERA | Negative |
| P09585 | MTQGSRLYFAVTVLMCAFVS | Negative |
| P09585 | LLERASQLSDKLHSLSTSLT | Negative |
| P09585 | YFAVTVLMCAFVSINGVGLN | Negative |
| P09585 | VGLNDLLERASQLSDKLHSL | Negative |
| P09585 | GVGLNDLLERASQLSDKLHS | Negative |
| P09585 | DLLERASQLSDKLHSLSTSL | Negative |
| P09585 | CAFVSINGVGLNDLLERASQ | Negative |
| P09585 | NGVGLNDLLERASQLSDKLH | Negative |
| P09585 | GSRLYFAVTVLMCAFVSING | Negative |
| P09585 | TVLMCAFVSINGVGLNDLLE | Negative |
| P09585 | INGVGLNDLLERASQLSDKL | Negative |
| P09585 | QGSRLYFAVTVLMCAFVSIN | Negative |
| P09585 | NDLLERASQLSDKLHSLSTS | Negative |
| P09585 | AVTVLMCAFVSINGVGLNDL | Negative |
| P09585 | VTVLMCAFVSINGVGLNDLL | Negative |
| P09585 | FVSINGVGLNDLLERASQLS | Negative |
| P09585 | LERASQLSDKLHSLSTSLTN | Negative |
| P09585 | VSINGVGLNDLLERASQLSD | Negative |
| P09585 | AFVSINGVGLNDLLERASQL | Negative |
| P09586 | LVWEKVTSLPNYRLPTESLY | Negative |
| P09586 | LLVWEKVTSLPNYRLPTESL | Negative |
| P09586 | LLLAVSNLLVWEKVTSLPN  | Negative |
| P09586 | CSFSGALLLLAVSNLLVWEK | Negative |



|        |                      |          |
|--------|----------------------|----------|
| P09586 | MKLSLSQPCSFSGALLLLAV | Negative |
| P09586 | AVSNLLVWEKVTSLPNYRLP | Negative |
| P09586 | ALLLLAVSNLLVWEKVTSLP | Negative |
| P09586 | KVTSLPNYRLPTESLYQRVI | Negative |
| P09586 | PCSFSGALLLLAVSNLLVWE | Negative |
| P09586 | WEKVTSLPNYRLPTESLYQR | Negative |
| P09586 | LLLAVSNLLVWEKVTSLPNY | Negative |
| P09586 | QPCSFSGALLLLAVSNLLVW | Negative |
| P09586 | VSNLLVWEKVTSLPNYRLPT | Negative |
| P09586 | LAVSNLLVWEKVTSLPNYRL | Negative |
| P09586 | SQPCSFSGALLLLAVSNLLV | Negative |
| P09586 | SNLLVWEKVTSLPNYRLPTE | Negative |
| P09586 | FSGALLLLAVSNLLVWEKVT | Negative |
| P09586 | NLLVWEKVTSLPNYRLPTES | Negative |
| P09586 | EKVTSLPNYRLPTESLYQRV | Negative |
| P09586 | VWEKVTSLPNYRLPTESLYQ | Negative |
| P09586 | KLSLSQPCSFSGALLLLAVS | Negative |
| P09586 | SGALLLLAVSNLLVWEKVT  | Negative |
| P09586 | SFSGALLLLAVSNLLVWEKV | Negative |
| P09586 | LSLSQPCSFSGALLLLAVSN | Negative |
| P09586 | SLSQPCSFSGALLLLAVSNL | Negative |
| P09586 | LSQPCSFSGALLLLAVSNLL | Negative |
| P09586 | GALLLLAVSNLLVWEKVTSL | Negative |
| P09586 | TSLPNYRLPTESLYQRVIVV | Negative |
| P09586 | VTSLPNYRLPTESLYQRVIV | Negative |
| P09616 | SSVTTTLLLSILMNPVAGA  | Negative |
| P09616 | DSDINIKTGTTDIGSNTTVK | Negative |
| P09616 | AADSDINIKTGTTDIGSNTT | Negative |
| P09616 | LLGSILMNPVAGAADSDINI | Negative |
| P09616 | VSSVTTTLLLSILMNPVAG  | Negative |
| P09616 | LLGSILMNPVAGAADSDIN  | Negative |
| P09616 | SDINIKTGTTDIGSNTTVKT | Negative |
| P09616 | RIVSSVTTTLLLSILMNPV  | Negative |
| P09616 | ADSDINIKTGTTDIGSNTTV | Negative |
| P09616 | MNPVAGAADSDINIKTGTTD | Negative |
| P09616 | TRIVSSVTTTLLLSILMNP  | Negative |
| P09616 | IVSSVTTTLLLSILMNPVA  | Negative |
| P09616 | TLLLSILMNPVAGAADSD   | Negative |
| P09616 | MKTRIVSSVTTTLLLSILM  | Negative |
| P09616 | KTRIVSSVTTTLLLSILMN  | Negative |
| P09616 | LGSILMNPVAGAADSDINIK | Negative |
| P09616 | DINIKTGTTDIGSNTTVKTG | Negative |
| P09616 | GAADSDINIKTGTTDIGSNT | Negative |
| P09616 | ILMNPVAGAADSDINIKTGT | Negative |
| P09616 | VAGAADSDINIKTGTTDIGS | Negative |
| P09616 | GSILMNPVAGAADSDINIKT | Negative |

|        |                      |          |
|--------|----------------------|----------|
| P09616 | SVTTTLLLSILMNPVAGAA  | Negative |
| P09616 | LMNPVAGAADSINIKTGTT  | Negative |
| P09616 | TTTLLLSILMNPVAGAADS  | Negative |
| P09616 | AGAADSINIKTGTTDIGSN  | Negative |
| P09616 | VTTTLLLSILMNPVAGAAD  | Negative |
| P09616 | SILMNPVAGAADSINIKTG  | Negative |
| P09616 | NPVAGAADSINIKTGTTDI  | Negative |
| P09616 | PVAGAADSINIKTGTTDIG  | Negative |
| P09655 | LALLSLAGNPPAEVNGKTPN | Negative |
| P09655 | VNGKTPNCPKQIMGCPRIYD | Negative |
| P09655 | IFLLSALALLSLAGNPPAEV | Negative |
| P09655 | NGKTPNCPKQIMGCPRIYDP | Negative |
| P09655 | KVAIIFLLSALALLSLAGNP | Negative |
| P09655 | SLAGNPPAEVNGKTPNCPKQ | Negative |
| P09655 | PPAEVNGKTPNCPKQIMGCP | Negative |
| P09655 | LSALALLSLAGNPPAEVNGK | Negative |
| P09655 | MKVAIIFLLSALALLSLAGN | Negative |
| P09655 | LLSLAGNPPAEVNGKTPNCP | Negative |
| P09655 | AEVNGKTPNCPKQIMGCPRI | Negative |
| P09655 | LLSALALLSLAGNPPAEVNG | Negative |
| P09655 | ALALLSLAGNPPAEVNGKTP | Negative |
| P09655 | FLLSALALLSLAGNPPAEVN | Negative |
| P09655 | VAIIFLLSALALLSLAGNPP | Negative |
| P09655 | TPNCPKQIMGCPRIYDPVCG | Negative |
| P09655 | PNCPKQIMGCPRIYDPVCGT | Negative |
| P09655 | SALALLSLAGNPPAEVNGKT | Negative |
| P09655 | ALLSLAGNPPAEVNGKTPNC | Negative |
| P09655 | IIFLLSALALLSLAGNPPAE | Negative |
| P09655 | AGNPPAEVNGKTPNCPKQIM | Negative |
| P09655 | LSLAGNPPAEVNGKTPNCPK | Negative |
| P09655 | GNPPAEVNGKTPNCPKQIMG | Negative |
| P09655 | PAEVNGKTPNCPKQIMGCPR | Negative |
| P09655 | EVNGKTPNCPKQIMGCPRIY | Negative |
| P09655 | NPPAEVNGKTPNCPKQIMGC | Negative |
| P09655 | KTPNCPKQIMGCPRIYDPVC | Negative |
| P09655 | GKTPNCPKQIMGCPRIYDPV | Negative |
| P09655 | LAGNPPAEVNGKTPNCPKQI | Negative |
| P09656 | SALALLNLAGNTTAKVIGKK | Negative |
| P09656 | ALALLNLAGNTTAKVIGKKA | Negative |
| P09656 | ANCPNTLVGCPRDYDPVCGT | Negative |
| P09656 | LALLNLAGNTTAKVIGKKAN | Negative |
| P09656 | FLLSALALLNLAGNTTAKVI | Negative |
| P09656 | TTAKVIGKKANCPNTLVGCP | Negative |
| P09656 | IIFLLSALALLNLAGNTTAK | Negative |
| P09656 | AIFLLSALALLNLAGNTTA  | Negative |
| P09656 | NTTAKVIGKKANCPNTLVGC | Negative |

|        |                      |          |
|--------|----------------------|----------|
| P09656 | VIGKKANCPNTLVGCPRDYD | Negative |
| P09656 | IGKKANCPNTLVGCPRDYDP | Negative |
| P09656 | LLNLAGNTTAKVIGKKANCP | Negative |
| P09656 | TAKVIGKKANCPNTLVGCPR | Negative |
| P09656 | IFLLSALALLNLAGNTTAKV | Negative |
| P09656 | AGNTTAKVIGKKANCPNTLV | Negative |
| P09656 | KVIGKKANCPNTLVGCPRDY | Negative |
| P09656 | KKANCPNTLVGCPRDYDPVC | Negative |
| P09656 | AKVIGKKANCPNTLVGCPRD | Negative |
| P09656 | LLSALALLNLAGNTTAKVIG | Negative |
| P09656 | LAGNTTAKVIGKKANCPNTL | Negative |
| P09656 | KVAIIFLLSALALLNLAGNT | Negative |
| P09656 | GNTTAKVIGKKANCPNTLVG | Negative |
| P09656 | VAIIFLLSALALLNLAGNTT | Negative |
| P09656 | NLAGNTTAKVIGKKANCPNT | Negative |
| P09656 | ALLNLAGNTTAKVIGKKANC | Negative |
| P09656 | LNLAGNTTAKVIGKKANCPN | Negative |
| P09656 | MKVAIIFLLSALALLNLGN  | Negative |
| P09656 | GKKANCPNTLVGCPRDYDPV | Negative |
| P09656 | KANCPNTLVGCPRDYDPVCG | Negative |
| P09787 | VKRMLVTGVVLPFGLLVAAG | Negative |
| P09787 | LVAAGQAQADSQWGSCKNLY | Negative |
| P09787 | VTGVVLPFGLLVAAGQAQAD | Negative |
| P09787 | RMLVTGVVLPFGLLVAAGQA | Negative |
| P09787 | QAQADSQWGSCKNLYDKVCG | Negative |
| P09787 | SGAAVKRMLVTGVVLPFGLL | Negative |
| P09787 | MTFPFSGAAVKRMLVTGVVL | Negative |
| P09787 | GVVLPFGLLVAAGQAQADSQ | Negative |
| P09787 | AGQAQADSQWGSCKNLYDKV | Negative |
| P09787 | PFGLLVAAGQAQADSQWGS  | Negative |
| P09787 | AAVKRMLVTGVVLPFGLLVA | Negative |
| P09787 | KRMLVTGVVLPFGLLVAAGQ | Negative |
| P09787 | FGLLVAAGQAQADSQWGS   | Negative |
| P09787 | TFPFSGAAVKRMLVTGVVLP | Negative |
| P09787 | FPFSGAAVKRMLVTGVVLPF | Negative |
| P09787 | PFSGAAVKRMLVTGVVLPFG | Negative |
| P09787 | LPFGLLVAAGQAQADSQWGS | Negative |
| P09787 | GQAQADSQWGSCKNLYDKVC | Negative |
| P09787 | FSGAAVKRMLVTGVVLPFGL | Negative |
| P09787 | LVTGVVLPFGLLVAAGQAQA | Negative |
| P09787 | MLVTGVVLPFGLLVAAGQAQ | Negative |
| P09787 | LLVAAGQAQADSQWGSCKNL | Negative |
| P09787 | GAAVKRMLVTGVVLPFGLLV | Negative |
| P09787 | TGVVLPFGLLVAAGQAQADS | Negative |
| P09787 | GLLVAAGQAQADSQWGSCKN | Negative |
| P09787 | VVLPFGLLVAAGQAQADSQW | Negative |

|        |                       |          |
|--------|-----------------------|----------|
| P09787 | AAGQAQADSQWGSgKNLYDK  | Negative |
| P09787 | VAAGQAQADSQWGSgKNLYD  | Negative |
| P09787 | AVKRMLVTGVVLPFGLLVAA  | Negative |
| P09791 | EGPEDKGLTKGGKKGKGGKGT | Negative |
| P09791 | LAVLLFSANLFAGVGFAAAA  | Negative |
| P09791 | PRSLYLLAVLLFSANLFAGV  | Negative |
| P09791 | FAGVGFAAAAEGPEDKGLTK  | Negative |
| P09791 | LFAGVGFAAAAEGPEDKGLT  | Negative |
| P09791 | YLLAVLLFSANLFAGVGFAA  | Negative |
| P09791 | VLLFSANLFAGVGFAAAAEG  | Negative |
| P09791 | AVLLFSANLFAGVGFAAAAEG | Negative |
| P09791 | SANLFAGVGFAAAAEGPEDK  | Negative |
| P09791 | AAAEGPEDKGLTKGGKKGKGG | Negative |
| P09791 | AEGPEDKGLTKGGKKGKGGKG | Negative |
| P09791 | AAAAEGPEDKGLTKGGKKGK  | Negative |
| P09791 | LLAVLLFSANLFAGVGFAAA  | Negative |
| P09791 | GFAAAAEGPEDKGLTKGGKG  | Negative |
| P09791 | RSLYLLAVLLFSANLFAGVG  | Negative |
| P09791 | AGVGFAAAAEGPEDKGLTKG  | Negative |
| P09791 | APRSLYLLAVLLFSANLFAG  | Negative |
| P09791 | ANLFAGVGFAAAAEGPEDKG  | Negative |
| P09791 | FAAAAEGPEDKGLTKGGKKG  | Negative |
| P09791 | SLYLLAVLLFSANLFAGVGF  | Negative |
| P09791 | VGFAAAAEGPEDKGLTKGGK  | Negative |
| P09791 | FSANLFAGVGFAAAAEGPED  | Negative |
| P09791 | AAEGPEDKGLTKGGKKGKGGK | Negative |
| P09791 | NLFAGVGFAAAAEGPEDKGL  | Negative |
| P09791 | MAPRSLYLLAVLLFSANLFA  | Negative |
| P09791 | GPEDKGLTKGGKKGKGGKGTK | Negative |
| P09791 | GVGFAAAAEGPEDKGLTKGG  | Negative |
| P09791 | LYLLAVLLFSANLFAGVGFA  | Negative |
| P09791 | LLFSANLFAGVGFAAAAEGP  | Negative |
| P09923 | LSLGVIPAEENPAFWNRQA   | Negative |
| P09923 | PAEEENPAFWNRQAALDA    | Negative |
| P09923 | MQGPWVLLLGLRLQLSLGV   | Negative |
| P09923 | LLLGLRLQLSLGVIPAEEN   | Negative |
| P09923 | LGVIPAEENPAFWNRQAAE   | Negative |
| P09923 | RLQLSLGVIPAEENPAFWN   | Negative |
| P09923 | ENPAFWNRQAALDAAKKL    | Negative |
| P09923 | EENPAFWNRQAALDAAKK    | Negative |
| P09923 | LQLSLGVIPAEENPAFWNR   | Negative |
| P09923 | QGPWVLLLGLRLQLSLGVI   | Negative |
| P09923 | LLLGLRLQLSLGVIPAEEN   | Negative |
| P09923 | EEENPAFWNRQAALDAAK    | Negative |
| P09923 | PWVLLLGLRLQLSLGVIPA   | Negative |
| P09923 | FWNRQAALDAAKKLQPIQ    | Negative |

|        |                       |          |
|--------|-----------------------|----------|
| P09923 | AEEENPAFWNRQAAEALDAA  | Negative |
| P09923 | LGLRLQLSLGVIPAEENPA   | Negative |
| P09923 | NPAFWNRQAAEALDAAKKLQ  | Negative |
| P09923 | SLGVIPAEENPAFWNRQAA   | Negative |
| P09923 | GPWVLLLLGLRLQLSLGVIP  | Negative |
| P09923 | LRLQLSLGVIPAEENPAFW   | Negative |
| P09923 | VIPAEENPAFWNRQAAEAL   | Negative |
| P09923 | LLGLRLQLSLGVIPAEENP   | Negative |
| P09923 | GLRLQLSLGVIPAEENPAF   | Negative |
| P09923 | AFWNRQAAEALDAAKKLQPI  | Negative |
| P09923 | IPAEENPAFWNRQAAEALD   | Negative |
| P09923 | VLLLLGLRLQLSLGVIPAE   | Negative |
| P09923 | PAFWNRQAAEALDAAKKLQP  | Negative |
| P09923 | QLSLGVIPAEENPAFWNRQ   | Negative |
| P09923 | GVIPAEENPAFWNRQAAEA   | Negative |
| P09954 | LLGGVLAKEDFVGHQVLRIS  | Negative |
| P09954 | DFVGHQVLRISVDDEAQVQK  | Negative |
| P09954 | QVLRISVDDEAQVQKVKELE  | Negative |
| P09954 | GVLAKEDFVGHQVLRISVDD  | Negative |
| P09954 | LIFSULLGGVLAKEDFVGHQ  | Negative |
| P09954 | GHQVLRISVDDEAQVQKVKE  | Negative |
| P09954 | VLRISVDDEAQVQKVKELED  | Negative |
| P09954 | GLLIFSULLGGVLAKEDFVG  | Negative |
| P09954 | HQVLRISVDDEAQVQKVKELE | Negative |
| P09954 | LAKEDFVGHQVLRISVDDEA  | Negative |
| P09954 | AKEDFVGHQVLRISVDDEAQ  | Negative |
| P09954 | LRISVDDEAQVQKVKELEDL  | Negative |
| P09954 | FVGHQVLRISVDDEAQVQKV  | Negative |
| P09954 | VDDEAQVQKVKELEDLEHLQ  | Negative |
| P09954 | LGGVLAKEDFVGHQVLRISV  | Negative |
| P09954 | VLLGGVLAKEDFVGHQVLRIS | Negative |
| P09954 | GGVLAKEDFVGHQVLRISVD  | Negative |
| P09954 | VGHQVLRISVDDEAQVQKV   | Negative |
| P09954 | FSVLLGGVLAKEDFVGHQVL  | Negative |
| P09954 | EDFVGHQVLRISVDDEAQVQ  | Negative |
| P09954 | LLIFSULLGGVLAKEDFVGH  | Negative |
| P09954 | SVDDEAQVQKVKELEDLEHL  | Negative |
| P09954 | MWGLLIFSULLGGVLAKEDF  | Negative |
| P09954 | SVLLGGVLAKEDFVGHQVLR  | Negative |
| P09954 | ISVDDEAQVQKVKELEDLEH  | Negative |
| P09954 | VLAKEDFVGHQVLRISVDDE  | Negative |
| P09954 | KEDFVGHQVLRISVDDEAQV  | Negative |
| P09954 | RISVDDEAQVQKVKELEDLE  | Negative |
| P09954 | IFSULLGGVLAKEDFVGHQV  | Negative |
| P09989 | ILTLFLTPAVEGDVSFRLS   | Negative |
| P09989 | LTLFLTPAVEGDVSFRLSG   | Negative |

|        |                      |          |
|--------|----------------------|----------|
| P09989 | SGATSSSYGVFISNLRKALP | Negative |
| P09989 | TPAVEGDVSFRLSGATSSSY | Negative |
| P09989 | IRFLVLSLLILTLFLTTPAV | Negative |
| P09989 | VEGDVSFRLSGATSSSYGVF | Negative |
| P09989 | LSGATSSSYGVFISNLRKAL | Negative |
| P09989 | FRLSGATSSSYGVFISNLRK | Negative |
| P09989 | GDVSFRLSGATSSSYGVFIS | Negative |
| P09989 | PAVEGDVSFRLSGATSSSYG | Negative |
| P09989 | LVLSLLILTLFLTTPAVEGD | Negative |
| P09989 | VLSLLILTLFLTTPAVEGDV | Negative |
| P09989 | SFRLSGATSSSYGVFISNLR | Negative |
| P09989 | LFLTTPAVEGDVSFRLSGAT | Negative |
| P09989 | LSLLILTLFLTTPAVEGDVS | Negative |
| P09989 | FLTTPAVEGDVSFRLSGATS | Negative |
| P09989 | LTPAVEGDVSFRLSGATSS  | Negative |
| P09989 | MIRFLVLSLLILTLFLTTPA | Negative |
| P09989 | FLVLSLLILTLFLTTPAVEG | Negative |
| P09989 | DVSFRLSGATSSSYGVFISN | Negative |
| P09989 | LILTLFLTTPAVEGDVSFRL | Negative |
| P09989 | TLFLTTPAVEGDVSFRLSGA | Negative |
| P09989 | TTPAVEGDVSFRLSGATSSS | Negative |
| P09989 | EGDVSFRLSGATSSSYGVFI | Negative |
| P09989 | VSFRLSGATSSSYGVFISNL | Negative |
| P09989 | RLSGATSSSYGVFISNLRKA | Negative |
| P09989 | AVEGDVSFRLSGATSSSYGV | Negative |
| P09989 | RFLVLSLLILTLFLTTPAVE | Negative |
| P09989 | SLLILTLFLTTPAVEGDVSF | Negative |
| P0A074 | VGLIAPLANPFIEISKAENK | Negative |
| P0A074 | ENKIEDIGQGAEIHKRTQDI | Negative |
| P0A074 | LTATLAVGLIAPLANPFIEI | Negative |
| P0A074 | NPFIEISKAENKIEDIGQGA | Negative |
| P0A074 | EISKAENKIEDIGQGAEIHK | Negative |
| P0A074 | MIKNKILTATLAVGLIAPLA | Negative |
| P0A074 | ATLAVGLIAPLANPFIEISK | Negative |
| P0A074 | KILTATLAVGLIAPLANPFI | Negative |
| P0A074 | IAPLANPFIEISKAENKIED | Negative |
| P0A074 | ANPFIEISKAENKIEDIGQG | Negative |
| P0A074 | PLANPFIEISKAENKIEDIG | Negative |
| P0A074 | PFIEISKAENKIEDIGQGAE | Negative |
| P0A074 | LANPFIEISKAENKIEDIGQ | Negative |
| P0A074 | GLIAPLANPFIEISKAENKI | Negative |
| P0A074 | AVGLIAPLANPFIEISKAEN | Negative |
| P0A074 | FIEISKAENKIEDIGQGAEI | Negative |
| P0A074 | SKAENKIEDIGQGAEIHKRT | Negative |
| P0A074 | KAENKIEDIGQGAEIHKRTQ | Negative |
| P0A074 | ILTATLAVGLIAPLANPFIE | Negative |

|        |                       |          |
|--------|-----------------------|----------|
| P0A074 | ISKAENKIEDIGQGAEIIKR  | Negative |
| P0A074 | TATLAVGLIAPLANPFIEIS  | Negative |
| P0A074 | KNKILTATLAVGLIAPLANP  | Negative |
| P0A074 | LAVGLIAPLANPFIEISKA   | Negative |
| P0A074 | NKILTATLAVGLIAPLANPF  | Negative |
| P0A074 | IKNKILTATLAVGLIAPLAN  | Negative |
| P0A074 | AENKIEDIGQGAEIIKRTQD  | Negative |
| P0A074 | TLAVGLIAPLANPFIEISKA  | Negative |
| P0A074 | IEISKAENKIEDIGQGAEII  | Negative |
| P0A074 | APLANPFIEISKAENKIEDI  | Negative |
| P0A0L2 | IALTLTTSPLVNGSEKSEEI  | Negative |
| P0A0L2 | TLLLFIALTLTTSPLVNGSE  | Negative |
| P0A0L2 | SPLVNGSEKSEEINEKDLRK  | Negative |
| P0A0L2 | TTSPVNGSEKSEEINEKDL   | Negative |
| P0A0L2 | EINEKDLRKKSELQGTALGN  | Negative |
| P0A0L2 | SEEINEKDLRKKSELQGTAL  | Negative |
| P0A0L2 | LLLFIALTLTTSPLVNGSEK  | Negative |
| P0A0L2 | TLTTSPLVNGSEKSEEINEK  | Negative |
| P0A0L2 | PLVNGSEKSEEINEKDLRKK  | Negative |
| P0A0L2 | TAFTLLLFIALTLTTSPLVN  | Negative |
| P0A0L2 | LLFIALTLTTSPLVNGSEKS  | Negative |
| P0A0L2 | EKSEEINEKDLRKKSELQGT  | Negative |
| P0A0L2 | LVNGSEKSEEINEKDLRKK   | Negative |
| P0A0L2 | EEINEKDLRKKSELQGTALG  | Negative |
| P0A0L2 | GSEKSEEINEKDLRKKSELQ  | Negative |
| P0A0L2 | KSEEINEKDLRKKSELQGTA  | Negative |
| P0A0L2 | LTLTTSPLVNGSEKSEEINE  | Negative |
| P0A0L2 | MKKTAFTLLLFIALTLTTSPL | Negative |
| P0A0L2 | FTLLLFIALTLTTSPLVNGS  | Negative |
| P0A0L2 | TSPLVNGSEKSEEINEKDLR  | Negative |
| P0A0L2 | KTAFTLLLFIALTLTTSPLV  | Negative |
| P0A0L2 | NGSEKSEEINEKDLRKKSEL  | Negative |
| P0A0L2 | KKTAFTLLLFIALTLTTSPL  | Negative |
| P0A0L2 | LTTSPVNGSEKSEEINEKD   | Negative |
| P0A0L2 | VNGSEKSEEINEKDLRKKSE  | Negative |
| P0A0L2 | SEKSEEINEKDLRKKSELQG  | Negative |
| P0A0L2 | FIALTLTTSPLVNGSEKSEE  | Negative |
| P0A0L2 | AFTLLLFIALTLTTSPLVNG  | Negative |
| P0A1E7 | GGGNHNGGNSSGPDSTLSI   | Negative |
| P0A1E7 | GVVPQWGGGNHNGGNSSG    | Negative |
| P0A1E7 | AAFAAIVVSGSALAGVVPQW  | Negative |
| P0A1E7 | KLLKVAFAAIVVSGSALAG   | Negative |
| P0A1E7 | VSGSALAGVVPQWGGGNHN   | Negative |
| P0A1E7 | VVPQWGGGNHNGGNSSGP    | Negative |
| P0A1E7 | MKLLKVAFAAIVVSGSALA   | Negative |
| P0A1E7 | AIVVSGSALAGVVPQWGGGG  | Negative |

|        |                      |          |
|--------|----------------------|----------|
| P0A1E7 | ALAGVVPQWGGGGNHNGGGN | Negative |
| P0A1E7 | IVVSGSALAGVVPQWGGGGN | Negative |
| P0A1E7 | GNHNGGGNSSGPDSTLSIYQ | Negative |
| P0A1E7 | WGGGGNHNGGGNSSGPDSTL | Negative |
| P0A1E7 | GSALAGVVPQWGGGGNHNGG | Negative |
| P0A1E7 | KVAAFAAIVVSGSALAGVVP | Negative |
| P0A1E7 | FAAIVVSGSALAGVVPQWGG | Negative |
| P0A1E7 | GGGGNHNGGGNSSGPDSTLS | Negative |
| P0A1E7 | LLKVAAFAAIVVSGSALAGV | Negative |
| P0A1E7 | VPQWGGGGNHNGGGNSSGPD | Negative |
| P0A1E7 | SALAGVVPQWGGGGNHNGGG | Negative |
| P0A1E7 | GGNHNGGGNSSGPDSTLSIY | Negative |
| P0A1E7 | AFAAIVVSGSALAGVVPQWG | Negative |
| P0A1E7 | LKVAAFAAIVVSGSALAGVV | Negative |
| P0A1E7 | AGVVPQWGGGGNHNGGGNSS | Negative |
| P0A1E7 | PQWGGGGNHNGGGNSSGPDS | Negative |
| P0A1E7 | LAGVVPQWGGGGNHNGGGNS | Negative |
| P0A1E7 | QWGGGGNHNGGGNSSGPDST | Negative |
| P0A1E7 | VVSGSALAGVVPQWGGGGNH | Negative |
| P0A1E7 | AAIVVSGSALAGVVPQWGGG | Negative |
| P0A1E7 | SGSALAGVVPQWGGGGNHNG | Negative |
| P0A1N4 | QDSGMGVTLNRYGVSAASSP | Negative |
| P0A1N4 | LTVQAAGEGAWQDSGMGVTL | Negative |
| P0A1N4 | AAGEGAWQDSGMGVTLNRYG | Negative |
| P0A1N4 | MRKWLALLFPLTVQAAGEG  | Negative |
| P0A1N4 | KWLALLFPLTVQAAGEGAW  | Negative |
| P0A1N4 | ALLFPLTVQAAGEGAWQDS  | Negative |
| P0A1N4 | LLFPLTVQAAGEGAWQDSGM | Negative |
| P0A1N4 | AWQDSGMGVTLNRYGVSAAS | Negative |
| P0A1N4 | LFPLTVQAAGEGAWQDSGMG | Negative |
| P0A1N4 | VTLNRYGVSAASSPLSARQP | Negative |
| P0A1N4 | PLTVQAAGEGAWQDSGMGVT | Negative |
| P0A1N4 | WQDSGMGVTLNRYGVSAASS | Negative |
| P0A1N4 | GAWQDSGMGVTLNRYGVSA  | Negative |
| P0A1N4 | GMGVTLNRYGVSAASSPLSA | Negative |
| P0A1N4 | EGAWQDSGMGVTLNRYGVSA | Negative |
| P0A1N4 | SGMGVTLNRYGVSAASSPLS | Negative |
| P0A1N4 | FPLTVQAAGEGAWQDSGMGV | Negative |
| P0A1N4 | TVQAAGEGAWQDSGMGVTLN | Negative |
| P0A1N4 | TLNRYGVSAASSPLSARQPV | Negative |
| P0A1N4 | AGEGAWQDSGMGVTLNRYGV | Negative |
| P0A1N4 | GVTLNRYGVSAASSPLSARQ | Negative |
| P0A1N4 | MGVTLNRYGVSAASSPLSAR | Negative |
| P0A1N4 | VQAAGEGAWQDSGMGVTLNY | Negative |
| P0A1N4 | GEGAWQDSGMGVTLNRYGV  | Negative |
| P0A1N4 | LALLFPLTVQAAGEGAWQD  | Negative |



|        |                       |          |
|--------|-----------------------|----------|
| P0A1N4 | LLLFPLTVQAAGEGAWQDSG  | Negative |
| P0A1N4 | WLALLFPLTVQAAGEGAWQ   | Negative |
| P0A1N4 | QAAGEGAWQDSGMGVTLNYS  | Negative |
| P0A1N4 | DSGMGVTLNYSRGVSASSSPL | Negative |
| P0A1V8 | SIFSLATFAHAQEGTLERSD  | Negative |
| P0A1V8 | RSDWRKFFSEFQAKGTIVVA  | Negative |
| P0A1V8 | DWRKFFSEFQAKGTIVVADE  | Negative |
| P0A1V8 | IFAILFSIFSLATFAHAQEG  | Negative |
| P0A1V8 | MAIRIFAILFSIFSLATFAH  | Negative |
| P0A1V8 | HAQEGTLERSDWRKFFSEFQ  | Negative |
| P0A1V8 | FAILFSIFSLATFAHAQEGT  | Negative |
| P0A1V8 | GTLERSDWRKFFSEFQAKGT  | Negative |
| P0A1V8 | SDWRKFFSEFQAKGTIVVAD  | Negative |
| P0A1V8 | ILFSIFSLATFAHAQEGTLE  | Negative |
| P0A1V8 | RIFAILFSIFSLATFAHAQE  | Negative |
| P0A1V8 | SLATFAHAQEGTLERSDWRK  | Negative |
| P0A1V8 | AHAQEGTLERSDWRKFFSEF  | Negative |
| P0A1V8 | AIRIFAILFSIFSLATFAHA  | Negative |
| P0A1V8 | EGTLERSDWRKFFSEFQAKG  | Negative |
| P0A1V8 | QEGTLERSDWRKFFSEFQAK  | Negative |
| P0A1V8 | TLERSDWRKFFSEFQAKGTI  | Negative |
| P0A1V8 | IRIFAILFSIFSLATFAHAQ  | Negative |
| P0A1V8 | ATFAHAQEGTLERSDWRKFF  | Negative |
| P0A1V8 | FAHAQEGTLERSDWRKFFSE  | Negative |
| P0A1V8 | LFSIFSLATFAHAQEGTLER  | Negative |
| P0A1V8 | AQEGTLERSDWRKFFSEFQA  | Negative |
| P0A1V8 | ERSDWRKFFSEFQAKGTIVV  | Negative |
| P0A1V8 | FSLATFAHAQEGTLERSDWR  | Negative |
| P0A1V8 | IFSLATFAHAQEGTLERSDW  | Negative |
| P0A1V8 | FSIFSLATFAHAQEGTLERS  | Negative |
| P0A1V8 | LATFAHAQEGTLERSDWRKF  | Negative |
| P0A1V8 | TFAHAQEGTLERSDWRKFFS  | Negative |
| P0A1V8 | LERSDWRKFFSEFQAKGTIV  | Negative |
| P0A1Z2 | LAMVTSAQAADKIAIVNMGN  | Negative |
| P0A1Z2 | AGLGLAMVTSAQAADKIAIV  | Negative |
| P0A1Z2 | KKWLLAAGLGLAMVTSAQAA  | Negative |
| P0A1Z2 | GNLFQQVAQKTGVSNTLENE  | Negative |
| P0A1Z2 | VTSAQAADKIAIVNMGNLFQ  | Negative |
| P0A1Z2 | MGNLFQQVAQKTGVSNTLEN  | Negative |
| P0A1Z2 | IAIVNMGNLFQQVAQKTGVS  | Negative |
| P0A1Z2 | NMGNLFQQVAQKTGVSNTLE  | Negative |
| P0A1Z2 | DKIAIVNMGNLFQQVAQKTG  | Negative |
| P0A1Z2 | LGLAMVTSAQAADKIAIVNM  | Negative |
| P0A1Z2 | QAADKIAIVNMGNLFQQVAQ  | Negative |
| P0A1Z2 | KIAIVNMGNLFQQVAQKTGV  | Negative |
| P0A1Z2 | TSAQAADKIAIVNMGNLFQQ  | Negative |

|        |                      |          |
|--------|----------------------|----------|
| P0A1Z2 | MKKWLLAAGLGLAMVTSQA  | Negative |
| P0A1Z2 | AAGLGLAMVTSQAADKIAI  | Negative |
| P0A1Z2 | AIVNMGNLFQQVAQKTGVS  | Negative |
| P0A1Z2 | SAQAADKIAIVNMGNLFQQV | Negative |
| P0A1Z2 | ADKIAIVNMGNLFQQVAQKT | Negative |
| P0A1Z2 | AADKIAIVNMGNLFQQVAQK | Negative |
| P0A1Z2 | VNMGNLFQQVAQKTGVSNTL | Negative |
| P0A1Z2 | AQAADKIAIVNMGNLFQQVA | Negative |
| P0A1Z2 | MVTSQAADKIAIVNMGNLF  | Negative |
| P0A1Z2 | LLAAGLGLAMVTSQAADKI  | Negative |
| P0A1Z2 | GLGLAMVTSQAADKIAIVN  | Negative |
| P0A1Z2 | KWLLAAGLGLAMVTSQAAD  | Negative |
| P0A1Z2 | AMVTSQAADKIAIVNMGNL  | Negative |
| P0A1Z2 | WLLAAGLGLAMVTSQAADK  | Negative |
| P0A1Z2 | GLAMVTSQAADKIAIVNMG  | Negative |
| P0A1Z2 | IVNMGNLFQQVAQKTGVSNT | Negative |
| P0A321 | GMALMAAFSAPVLAEECSVD | Negative |
| P0A321 | QVLGGMALMAAFSAPVLAEE | Negative |
| P0A321 | GTDQMQFDKKAIEVSKSCKQ | Negative |
| P0A321 | AAFSAPVLAEECSVDIAGTD | Negative |
| P0A321 | MAAFSAPVLAEECSVDIAGT | Negative |
| P0A321 | IAGTDQMQFDKKAIEVSKSC | Negative |
| P0A321 | SAPVLAEECSVDIAGTDQMQ | Negative |
| P0A321 | VDIAGTDQMQFDKKAIEVSK | Negative |
| P0A321 | AECSVDIAGTDQMQFDKKA  | Negative |
| P0A321 | MALMAAFSAPVLAEECSVDI | Negative |
| P0A321 | FKQVLGGMALMAAFSAPVLA | Negative |
| P0A321 | CSVDIAGTDQMQFDKKAIEV | Negative |
| P0A321 | ECSVDIAGTDQMQFDKKAIE | Negative |
| P0A321 | ALMAAFSAPVLAEECSVDIA | Negative |
| P0A321 | KQVLGGMALMAAFSAPVLA  | Negative |
| P0A321 | DIAGTDQMQFDKKAIEVSKS | Negative |
| P0A321 | MFKQVLGGMALMAAFSAPVL | Negative |
| P0A321 | LAAECSVDIAGTDQMQFDKK | Negative |
| P0A321 | FSAPVLAEECSVDIAGTDQM | Negative |
| P0A321 | PVLAEECSVDIAGTDQMQFD | Negative |
| P0A321 | LMAAFSAPVLAEECSVDIAG | Negative |
| P0A321 | SVDIAGTDQMQFDKKAIEVS | Negative |
| P0A321 | AFSAPVLAEECSVDIAGTDQ | Negative |
| P0A321 | APVLAEECSVDIAGTDQMVF | Negative |
| P0A321 | AAECSVDIAGTDQMQFDKKA | Negative |
| P0A321 | AGTDQMQFDKKAIEVSKSCK | Negative |
| P0A321 | LGGMALMAAFSAPVLAEECS | Negative |
| P0A321 | VLAAECSVDIAGTDQMQFDK | Negative |
| P0A321 | VLGGMALMAAFSAPVLAEEC | Negative |
| P0A3R9 | VAKVAVGSAAVLGLAVGFQT | Negative |

|        |                      |          |
|--------|----------------------|----------|
| P0A3R9 | SIIRNRVAKVAVGSAAVLGL | Negative |
| P0A3R9 | NRVAKVAVGSAAVLGLAVGF | Negative |
| P0A3R9 | AVGSAAVLGLAVGFQTPAVA | Negative |
| P0A3R9 | VLGLAVGFQTPAVAAAPTAT | Negative |
| P0A3R9 | LAVGFQTPAVAAAPTATVTP | Negative |
| P0A3R9 | MVPISIIRNRVAKVAVGSAA | Negative |
| P0A3R9 | VGFQTPAVAAAPTATVTPSS | Negative |
| P0A3R9 | AKVAVGSAAVLGLAVGFQTP | Negative |
| P0A3R9 | TPAVAAAPTATVTPSSGLSD | Negative |
| P0A3R9 | KVAVGSAAVLGLAVGFQTPA | Negative |
| P0A3R9 | AAVLGLAVGFQTPAVAAAPT | Negative |
| P0A3R9 | VPISIIRNRVAKVAVGSAAV | Negative |
| P0A3R9 | IRNRVAKVAVGSAAVLGLAV | Negative |
| P0A3R9 | SAAVLGLAVGFQTPAVAAAP | Negative |
| P0A3R9 | VGSAAVLGLAVGFQTPAVAA | Negative |
| P0A3R9 | PISIIRNRVAKVAVGSAAVL | Negative |
| P0A3R9 | AVGFQTPAVAAAPTATVTPS | Negative |
| P0A3R9 | GFQTPAVAAAPTATVTPSSG | Negative |
| P0A3R9 | IIRNRVAKVAVGSAAVLGLA | Negative |
| P0A3R9 | GLAVGFQTPAVAAAPTATVT | Negative |
| P0A3R9 | LGLAVGFQTPAVAAAPTATV | Negative |
| P0A3R9 | QTPAVAAAPTATVTPSSGLS | Negative |
| P0A3R9 | RNRVAKVAVGSAAVLGLAVG | Negative |
| P0A3R9 | ISIIRNRVAKVAVGSAAVLG | Negative |
| P0A3R9 | GSAAVLGLAVGFQTPAVAAA | Negative |
| P0A3R9 | RVAKVAVGSAAVLGLAVGFQ | Negative |
| P0A3R9 | FQTPAVAAAPTATVTPSSGL | Negative |
| P0A3R9 | VAVGSAAVLGLAVGFQTPAV | Negative |
| P0A3V1 | AFIGLSLMVSSIQLKNVEAF | Negative |
| P0A3V1 | SLMVSSIQLKNVEAFSNQVI | Negative |
| P0A3V1 | KIAVLLAFIGLSLMVSSIQL | Negative |
| P0A3V1 | IFKIAVLLAFIGLSLMVSSI | Negative |
| P0A3V1 | NVEAFSNQVIQRGASGEDVI | Negative |
| P0A3V1 | VEAFSNQVIQRGASGEDVIE | Negative |
| P0A3V1 | VLLAFIGLSLMVSSIQLKNV | Negative |
| P0A3V1 | IGLSLMVSSIQLKNVEAFSN | Negative |
| P0A3V1 | SIQLKNVEAFSNQVIQRGAS | Negative |
| P0A3V1 | FIGLSLMVSSIQLKNVEAFS | Negative |
| P0A3V1 | FKIAVLLAFIGLSLMVSSIQ | Negative |
| P0A3V1 | QLKNVEAFSNQVIQRGASGE | Negative |
| P0A3V1 | QKAIFKIAVLLAFIGLSLMV | Negative |
| P0A3V1 | AIFKIAVLLAFIGLSLMVSS | Negative |
| P0A3V1 | RQKAIFKIAVLLAFIGLSLM | Negative |
| P0A3V1 | IQLKNVEAFSNQVIQRGASG | Negative |
| P0A3V1 | IAVLLAFIGLSLMVSSIQLK | Negative |
| P0A3V1 | LKNVEAFSNQVIQRGASGED | Negative |

|        |                       |          |
|--------|-----------------------|----------|
| P0A3V1 | SSIQ LKNVEAFSNQVIQRGA | Negative |
| P0A3V1 | MVSSIQ LKNVEAFSNQVIQR | Negative |
| P0A3V1 | MRQKAIFKIAVLLAFIGLSL  | Negative |
| P0A3V1 | LMVSSIQ LKNVEAFSNQVIQ | Negative |
| P0A3V1 | KAIFKIAVLLAFIGLSLMVS  | Negative |
| P0A3V1 | LLAFIGLSLMVSSIQ LKNVE | Negative |
| P0A3V1 | VSSIQ LKNVEAFSNQVIQRG | Negative |
| P0A3V1 | AVLLAFIGLSLMVSSIQ LKN | Negative |
| P0A3V1 | GLSLMVSSIQ LKNVEAFSNQ | Negative |
| P0A3V1 | LAFIGLSLMVSSIQ LKNVEA | Negative |
| P0A3V1 | KNVEAFSNQVIQRGASGEDV  | Negative |
| P0A402 | WLGFTPLASADVAGLVPC KD | Negative |
| P0A402 | ALLVLTLWLGFTPLASADV   | Negative |
| P0A402 | ADVAGLVPC KDSPAFQKRAA | Negative |
| P0A402 | LLVLTLWLGFTPLASADVAG  | Negative |
| P0A402 | TPLASADVAGLVPC KDSPAF | Negative |
| P0A402 | ASADVAGLVPC KDSPAFQKR | Negative |
| P0A402 | LALLVLTLWLGFTPLASAD   | Negative |
| P0A402 | GFTPLASADVAGLVPC KDSP | Negative |
| P0A402 | TLWLGFTPLASADVAGLVPC  | Negative |
| P0A402 | RRFLALLVLTLWLGFTPLA   | Negative |
| P0A402 | MRRFLALLVLTLWLGFTPL   | Negative |
| P0A402 | GLVPC KDSPAFQKRAAAVN  | Negative |
| P0A402 | VLTLWLGFTPLASADVAGLV  | Negative |
| P0A402 | LTLWLGFTPLASADVAGLV   | Negative |
| P0A402 | LVPCKDSPAFQKRAAAVNT   | Negative |
| P0A402 | LLLVLTLWLGFTPLASADVA  | Negative |
| P0A402 | VPC KDSPAFQKRAAAVNTT  | Negative |
| P0A402 | LGFTPLASADVAGLVPC KDS | Negative |
| P0A402 | SADVAGLVPC KDSPAFQKRA | Negative |
| P0A402 | PLASADVAGLVPC KDSPAFQ | Negative |
| P0A402 | FTPLASADVAGLVPC KDSPA | Negative |
| P0A402 | LWLGFTPLASADVAGLVPC K | Negative |
| P0A402 | VAGLVPC KDSPAFQKRAAAA | Negative |
| P0A402 | DVAGLVPC KDSPAFQKRAAA | Negative |
| P0A402 | AGLVPC KDSPAFQKRAAAAV | Negative |
| P0A402 | FLALLVLTLWLGFTPLASA   | Negative |
| P0A402 | PCKDSPAFQKRAAAVNTTA   | Negative |
| P0A402 | LASADVAGLVPC KDSPAFQK | Negative |
| P0A402 | RFLALLVLTLWLGFTPLAS   | Negative |
| P0A431 | FAAKQTLTYDDIVGTGLANK  | Negative |
| P0A431 | AKQTLTYDDIVGTGLANKCP  | Negative |
| P0A431 | SAPAFAAKQTLTYDDIVGTG  | Negative |
| P0A431 | MKYRILMATLLAVCLGIFSL  | Negative |
| P0A431 | CLGIFSLSAPAFAAKQTLTY  | Negative |
| P0A431 | MATLLAVCLGIFSLSAPAF   | Negative |

|        |                      |          |
|--------|----------------------|----------|
| P0A431 | LMATLLAVCLGIFSLSAPAF | Negative |
| P0A431 | FSLSAPAFAAKQTLTYDDIV | Negative |
| P0A431 | KQTLTYDDIVGTGLANKCPT | Negative |
| P0A431 | GIFSLSAPAFAAKQTLTYDD | Negative |
| P0A431 | PAFAAKQTLTYDDIVGTGLA | Negative |
| P0A431 | LLAVCLGIFSLSAPAFAAKQ | Negative |
| P0A431 | IFSLSAPAFAAKQTLTYDDI | Negative |
| P0A431 | SLSAPAFAAKQTLTYDDIVG | Negative |
| P0A431 | RILMATLLAVCLGIFSLSAP | Negative |
| P0A431 | VCLGIFSLSAPAFAAKQTLT | Negative |
| P0A431 | ATLLAVCLGIFSLSAPAFAA | Negative |
| P0A431 | TLLAVCLGIFSLSAPAFAAK | Negative |
| P0A431 | TLTYDDIVGTGLANKCPTLD | Negative |
| P0A431 | YRILMATLLAVCLGIFSLSA | Negative |
| P0A431 | LGIFSLSAPAFAAKQTLTYD | Negative |
| P0A431 | QTLTYDDIVGTGLANKCPTL | Negative |
| P0A431 | LSAPAFAAKQTLTYDDIVGT | Negative |
| P0A431 | APAFAAKQTLTYDDIVGTGL | Negative |
| P0A431 | LAVCLGIFSLSAPAFAAKQT | Negative |
| P0A431 | AAKQTLTYDDIVGTGLANKC | Negative |
| P0A431 | ILMATLLAVCLGIFSLSAPA | Negative |
| P0A431 | AFAAKQTLTYDDIVGTGLAN | Negative |
| P0A431 | KYRILMATLLAVCLGIFSLS | Negative |
| P0A5Q5 | IFMLVTAVVLLCCSGVATAA | Negative |
| P0A5Q5 | FMLVTAVVLLCCSGVATAAP | Negative |
| P0A5Q5 | GVATAAPKTYCEELKGTDTG | Negative |
| P0A5Q5 | ATAAPKTYCEELKGTDTGQA | Negative |
| P0A5Q5 | AVVLLCCSGVATAAPKTYCE | Negative |
| P0A5Q5 | PKTYCEELKGTDTGQACQIQ | Negative |
| P0A5Q5 | MRIKIFMLVTAVVLLCCSGV | Negative |
| P0A5Q5 | AAPKTYCEELKGTDTGQACQ | Negative |
| P0A5Q5 | LLCCSGVATAAPKTYCEELK | Negative |
| P0A5Q5 | RIKIFMLVTAVVLLCCSGVA | Negative |
| P0A5Q5 | VATAAPKTYCEELKGTDTGQ | Negative |
| P0A5Q5 | SGVATAAPKTYCEELKGTDT | Negative |
| P0A5Q5 | KIFMLVTAVVLLCCSGVATA | Negative |
| P0A5Q5 | LVTAVVLLCCSGVATAAPKT | Negative |
| P0A5Q5 | CEELKGTDTGQACQIQMSDP | Negative |
| P0A5Q5 | KTYCEELKGTDTGQACQIQM | Negative |
| P0A5Q5 | CCSGVATAAPKTYCEELKGT | Negative |
| P0A5Q5 | MLVTAVVLLCCSGVATAAPK | Negative |
| P0A5Q5 | VLLCCSGVATAAPKTYCEEL | Negative |
| P0A5Q5 | IKIFMLVTAVVLLCCSGVAT | Negative |
| P0A5Q5 | TAAPKTYCEELKGTDTGQAC | Negative |
| P0A5Q5 | TYCEELKGTDTGQACQIQMS | Negative |
| P0A5Q5 | LCCSGVATAAPKTYCEELKG | Negative |

|        |                      |          |
|--------|----------------------|----------|
| P0A5Q5 | TAVVLLCCSGVATAAPKTYC | Negative |
| P0A5Q5 | YCEELKGTDTGQACQIQMSD | Negative |
| P0A5Q5 | CSGVATAAPKTYCEELKGTD | Negative |
| P0A5Q5 | APKTYCEELKGTDTGQACQI | Negative |
| P0A5Q5 | EELKGTDTGQACQIQMSDPA | Negative |
| P0A5Q5 | VVLLCCSGVATAAPKTYCEE | Negative |
| P0A855 | AEVRIVIDSGVDSGRPIGVV | Negative |
| P0A855 | MKQALRVAFGFLILWASVLH | Negative |
| P0A855 | LHAEVRIVIDSGVDSGRPIG | Negative |
| P0A855 | GFLILWASVLHAEVRIVIDS | Negative |
| P0A855 | VIDSGVDSGRPIGVVPFQWA | Negative |
| P0A855 | IVIDSGVDSGRPIGVVPFQW | Negative |
| P0A855 | IDSGVDSGRPIGVVPFQWAG | Negative |
| P0A855 | KQALRVAFGFLILWASVLHA | Negative |
| P0A855 | EVRIVIDSGVDSGRPIGVVP | Negative |
| P0A855 | SVLHAEVRIVIDSGVDSGRP | Negative |
| P0A855 | DSGVDSGRPIGVVPFQWAGP | Negative |
| P0A855 | LWASVLHAEVRIVIDSGVDS | Negative |
| P0A855 | LILWASVLHAEVRIVIDSGV | Negative |
| P0A855 | VLHAEVRIVIDSGVDSGRPI | Negative |
| P0A855 | LRVAFGFLILWASVLHAEVR | Negative |
| P0A855 | AFGFLILWASVLHAEVRIVI | Negative |
| P0A855 | FGFLILWASVLHAEVRIVID | Negative |
| P0A855 | VRIVIDSGVDSGRPIGVVPF | Negative |
| P0A855 | WASVLHAEVRIVIDSGVDSG | Negative |
| P0A855 | RVAFGFLILWASVLHAEVRI | Negative |
| P0A855 | ALRVAFGFLILWASVLHAEV | Negative |
| P0A855 | HAEVRIVIDSGVDSGRPIGV | Negative |
| P0A855 | GVDSGRPIGVVPFQWAGPGA | Negative |
| P0A855 | QALRVAFGFLILWASVLHAE | Negative |
| P0A855 | SGVDSGRPIGVVPFQWAGPG | Negative |
| P0A855 | ILWASVLHAEVRIVIDSGVD | Negative |
| P0A855 | RIVIDSGVDSGRPIGVVPFQ | Negative |
| P0A855 | ASVLHAEVRIVIDSGVDSGR | Negative |
| P0A855 | FLILWASVLHAEVRIVIDSG | Negative |
| P0A8X2 | SLLGLTFASLMFSAGSAVAA | Negative |
| P0A8X2 | LGLTFASLMFSAGSAVAADY | Negative |
| P0A8X2 | EGQHAFVNFRIQHLGYSWLY | Negative |
| P0A8X2 | KKSLGLTFASLMFSAGSAV  | Negative |
| P0A8X2 | DKEGQHAFVNFRIQHLGYSW | Negative |
| P0A8X2 | KSLGLTFASLMFSAGSAVA  | Negative |
| P0A8X2 | MFSAGSAVAADYKIDKEGQH | Negative |
| P0A8X2 | FASLMFSAGSAVAADYKIDK | Negative |
| P0A8X2 | ASLMFSAGSAVAADYKIDKE | Negative |
| P0A8X2 | ADYKIDKEGQHAFVNFRIQH | Negative |
| P0A8X2 | LMFSAGSAVAADYKIDKEGQ | Negative |

|        |                      |          |
|--------|----------------------|----------|
| P0A8X2 | GSAVAADYKIDKEGQHAFVN | Negative |
| P0A8X2 | SAGSAVAADYKIDKEGQHAF | Negative |
| P0A8X2 | AADYKIDKEGQHAFVNFRIQ | Negative |
| P0A8X2 | VAADYKIDKEGQHAFVNFRI | Negative |
| P0A8X2 | GLTFASLMFSAGSAVAADYK | Negative |
| P0A8X2 | KIDKEGQHAFVNFRIQHLGY | Negative |
| P0A8X2 | YKIDKEGQHAFVNFRIQHLG | Negative |
| P0A8X2 | AGSAVAADYKIDKEGQHAFV | Negative |
| P0A8X2 | MKKSLLGLTFASLMFSAGSA | Negative |
| P0A8X2 | FSAGSAVAADYKIDKEGQHA | Negative |
| P0A8X2 | LLGLTFASLMFSAGSAVAAD | Negative |
| P0A8X2 | DYKIDKEGQHAFVNFRIQHL | Negative |
| P0A8X2 | AVAADYKIDKEGQHAFVNFR | Negative |
| P0A8X2 | SAVAADYKIDKEGQHAFVNF | Negative |
| P0A8X2 | TFASLMFSAGSAVAADYKID | Negative |
| P0A8X2 | KEGQHAFVNFRIQHLGYSWL | Negative |
| P0A8X2 | SLMFSAGSAVAADYKIDKEG | Negative |
| P0A8X2 | IDKEGQHAFVNFRIQHLGYS | Negative |
| P0A908 | LIATSAGVAHAEGKFSLGAG | Negative |
| P0A908 | GAGVGVVEHPYKDYDTDVYP | Negative |
| P0A908 | KLKLLALGVLIATSAGVAHA | Negative |
| P0A908 | LALGVLIATSAGVAHAEGKF | Negative |
| P0A908 | AGVAHAEGKFSLGAGVGVVE | Negative |
| P0A908 | GVAHAEGKFSLGAGVGVVEH | Negative |
| P0A908 | TKLKLLALGVLIATSAGVAH | Negative |
| P0A908 | TSAGVAHAEGKFSLGAGVGV | Negative |
| P0A908 | EGKFSLGAGVGVVEHPYKDY | Negative |
| P0A908 | ATSAGVAHAEGKFSLGAGVG | Negative |
| P0A908 | FSLGAGVGVVEHPYKDYDTD | Negative |
| P0A908 | KLLALGVLIATSAGVAHAEG | Negative |
| P0A908 | HAEGKFSLGAGVGVVEHPYK | Negative |
| P0A908 | IATSAGVAHAEGKFSLGAGV | Negative |
| P0A908 | LGAGVGVVEHPYKDYDTDVY | Negative |
| P0A908 | VAHAEGKFSLGAGVGVVEHP | Negative |
| P0A908 | LGVLIATSAGVAHAEGKFSL | Negative |
| P0A908 | AEGKFSLGAGVGVVEHPYKD | Negative |
| P0A908 | GVLIATSAGVAHAEGKFSLG | Negative |
| P0A908 | VLIATSAGVAHAEGKFSLGA | Negative |
| P0A908 | KFSLGAGVGVVEHPYKDYDT | Negative |
| P0A908 | AHAEGKFSLGAGVGVVEHPY | Negative |
| P0A908 | SLGAGVGVVEHPYKDYDTDV | Negative |
| P0A908 | MTKLKLLALGVLIATSAGVA | Negative |
| P0A908 | LKLLALGVLIATSAGVAHAE | Negative |
| P0A908 | SAGVAHAEGKFSLGAGVGVV | Negative |
| P0A908 | GKFSLGAGVGVVEHPYKDYD | Negative |
| P0A908 | LLALGVLIATSAGVAHAEGK | Negative |

|        |                      |          |
|--------|----------------------|----------|
| P0A908 | AGVGVVEHPYKDYDTDVYPV | Negative |
| P0A915 | ALAVTTLLSGSAFAHEAGEF | Negative |
| P0A915 | AGEFFMRAGSATVRPTEGAG | Negative |
| P0A915 | LSGSAFAHEAGEFFMRAGSA | Negative |
| P0A915 | GSAFAHEAGEFFMRAGSATV | Negative |
| P0A915 | TLLSGSAFAHEAGEFFMRAG | Negative |
| P0A915 | LAVTTLLSGSAFAHEAGEFF | Negative |
| P0A915 | MKKLTVAALAVTTLLSGSAF | Negative |
| P0A915 | EAGEFFMRAGSATVRPTEGA | Negative |
| P0A915 | HEAGEFFMRAGSATVRPTEG | Negative |
| P0A915 | TVAALAVTTLLSGSAFAHEA | Negative |
| P0A915 | AFHEAGEFFMRAGSATVRP  | Negative |
| P0A915 | FMAGSATVRPTEGAGGTLG  | Negative |
| P0A915 | KKLTVAALAVTTLLSGSAFA | Negative |
| P0A915 | MRAGSATVRPTEGAGGTLGS | Negative |
| P0A915 | GEFFMRAGSATVRPTEGAGG | Negative |
| P0A915 | TLLSGSAFAHEAGEFFMRA  | Negative |
| P0A915 | AVTTLLSGSAFAHEAGEFFM | Negative |
| P0A915 | VTTLLSGSAFAHEAGEFFMR | Negative |
| P0A915 | FFMRAGSATVRPTEGAGGTL | Negative |
| P0A915 | EFFMRAGSATVRPTEGAGGT | Negative |
| P0A915 | AHEAGEFFMRAGSATVRPTE | Negative |
| P0A915 | SGSAFAHEAGEFFMRAGSAT | Negative |
| P0A915 | FAHEAGEFFMRAGSATVRPT | Negative |
| P0A915 | RAGSATVRPTEGAGGTLGSL | Negative |
| P0A915 | VAALAVTTLLSGSAFAHEAG | Negative |
| P0A915 | KLTVAALAVTTLLSGSAFAH | Negative |
| P0A915 | LTVAALAVTTLLSGSAFAHE | Negative |
| P0A915 | LLSGSAFAHEAGEFFMRAGS | Negative |
| P0A915 | SAFAHEAGEFFMRAGSATVR | Negative |
| P0A9Z7 | ASPQPLEQIKLSESQLSGRV | Negative |
| P0A9Z7 | IISLLATLPLAVHASPQPLE | Negative |
| P0A9Z7 | IRLCIISLLATLPLAVHASP | Negative |
| P0A9Z7 | SLLATLPLAVHASPQPLEQI | Negative |
| P0A9Z7 | QIKLSESQLSGRVGMIEMDL | Negative |
| P0A9Z7 | KLSESQLSGRVGMIEMDLAS | Negative |
| P0A9Z7 | AVHASPQPLEQIKLSESQLS | Negative |
| P0A9Z7 | PQPLEQIKLSESQLSGRVGM | Negative |
| P0A9Z7 | LLATLPLAVHASPQPLEQIK | Negative |
| P0A9Z7 | RYIRLCIISLLATLPLAVHA | Negative |
| P0A9Z7 | IKLSESQLSGRVGMIEMDLA | Negative |
| P0A9Z7 | VHASPQPLEQIKLSESQLSG | Negative |
| P0A9Z7 | PLEQIKLSESQLSGRVGMIE | Negative |
| P0A9Z7 | TLPLAVHASPQPLEQIKLSE | Negative |
| P0A9Z7 | YIRLCIISLLATLPLAVHAS | Negative |
| P0A9Z7 | QPLEQIKLSESQLSGRVGMI | Negative |



|        |                        |          |
|--------|------------------------|----------|
| P0A9Z7 | MRYIRLCIISLLATLPLAVH   | Negative |
| P0A9Z7 | PLAVHASPPQPLEQIKLSESQ  | Negative |
| P0A9Z7 | HASPPQPLEQIKLSESQSLSGR | Negative |
| P0A9Z7 | LEQIKLSESQSLSGRVGMIEM  | Negative |
| P0A9Z7 | ISLLATLPLAVHASPPQPLEQ  | Negative |
| P0A9Z7 | ATLPLAVHASPPQPLEQIKLS  | Negative |
| P0A9Z7 | LATLPLAVHASPPQPLEQIKL  | Negative |
| P0A9Z7 | SPQPLEQIKLSESQSLSGRVG  | Negative |
| P0A9Z7 | LAVHASPPQPLEQIKLSESQ   | Negative |
| P0A9Z7 | LPLAVHASPPQPLEQIKLSES  | Negative |
| P0A9Z7 | RLCIISLLATLPLAVHASPPQ  | Negative |
| P0A9Z7 | EQIKLSESQSLSGRVGMIEMD  | Negative |
| P0A9Z7 | LCIISLLATLPLAVHASPPQ   | Negative |
| P0AAA9 | MMALSAMAMGSTSAFAHGGH   | Negative |
| P0AAA9 | TSFAHGGHGMWQQNAAPLT    | Negative |
| P0AAA9 | GSTSAFAHGGHGMWQQNAAP   | Negative |
| P0AAA9 | MAMGSTSAFAHGGHGMWQQN   | Negative |
| P0AAA9 | ALVMMALSAMAMGSTSAFAH   | Negative |
| P0AAA9 | GGHGMWQQNAAPLTSEQQTA   | Negative |
| P0AAA9 | SAMAMGSTSAFAHGGHGMWQ   | Negative |
| P0AAA9 | LSAMAMGSTSAFAHGGHGMW   | Negative |
| P0AAA9 | AFAHGGHGMWQQNAAPLTSE   | Negative |
| P0AAA9 | AHGGHGMWQQNAAPLTSEQQ   | Negative |
| P0AAA9 | SAFAHGGHGMWQQNAAPLTS   | Negative |
| P0AAA9 | AMGSTSAFAHGGHGMWQQNA   | Negative |
| P0AAA9 | FAHGGHGMWQQNAAPLTSEQ   | Negative |
| P0AAA9 | TKIALVMMALSAMAMGSTSA   | Negative |
| P0AAA9 | NTKIALVMMALSAMAMGSTS   | Negative |
| P0AAA9 | LVMMALSAMAMGSTSAFAHG   | Negative |
| P0AAA9 | AMAMGSTSAFAHGGHGMWQQ   | Negative |
| P0AAA9 | STSFAHGGHGMWQQNAAPL    | Negative |
| P0AAA9 | ALSAMAMGSTSAFAHGGHGM   | Negative |
| P0AAA9 | HGMWQQNAAPLTSEQQTAWQ   | Negative |
| P0AAA9 | KRNTKIALVMMALSAMAMGS   | Negative |
| P0AAA9 | HGGHGMWQQNAAPLTSEQQT   | Negative |
| P0AAA9 | MKRNTKIALVMMALSAMAMG   | Negative |
| P0AAA9 | GHGMWQQNAAPLTSEQQTAW   | Negative |
| P0AAA9 | IALVMMALSAMAMGSTSAFA   | Negative |
| P0AAA9 | KIALVMMALSAMAMGSTSAF   | Negative |
| P0AAA9 | MGSTSAFAHGGHGMWQQNAA   | Negative |
| P0AAA9 | VMMALSAMAMGSTSAFAHGG   | Negative |
| P0AAA9 | RNTKIALVMMALSAMAMGST   | Negative |
| P0AAX8 | FAAAFAVVGFCSTASAVTYP   | Negative |
| P0AAX8 | CSTASAVTYPLPTDGSRLVG   | Negative |
| P0AAX8 | SAVTYPLPTDGSRLVGQNQV   | Negative |
| P0AAX8 | MKLKTLFAAAFAVVGFCSTA   | Negative |

|        |                        |          |
|--------|------------------------|----------|
| P0AAX8 | FCSTASAVTYPLPTDGSRLV   | Negative |
| P0AAX8 | AFVVGFCSTASAVTYPLPT    | Negative |
| P0AAX8 | AAFAVVGFCSTASAVTYPLP   | Negative |
| P0AAX8 | VGFCSTASAVTYPLPTDGSR   | Negative |
| P0AAX8 | LKTLFAAAFAVVGFCSTASA   | Negative |
| P0AAX8 | AVVGFCSTASAVTYPLPTDG   | Negative |
| P0AAX8 | VVGFCSTASAVTYPLPTDGS   | Negative |
| P0AAX8 | ASAVTYPLPTDGSRLVGQNQ   | Negative |
| P0AAX8 | AVTYPLPTDGSRLVGQNQVI   | Negative |
| P0AAX8 | FAVVGFCSTASAVTYPLPTD   | Negative |
| P0AAX8 | TLFAAAFAVVGFCSTASAVT   | Negative |
| P0AAX8 | NMKLKTTLFAAAFAVVGFCST  | Negative |
| P0AAX8 | VTYPLPTDGSRLVGQNQVIT   | Negative |
| P0AAX8 | GFCSTASAVTYPLPTDGSRL   | Negative |
| P0AAX8 | PTDGSRLVGQNQVITIPEGN   | Negative |
| P0AAX8 | KTLFAAAFAVVGFCSTASAV   | Negative |
| P0AAX8 | MNMKLKTTLFAAAFAVVGFCST | Negative |
| P0AAX8 | PLPTDGSRLVGQNQVITIPE   | Negative |
| P0AAX8 | LFAAAFAVVGFCSTASAVTY   | Negative |
| P0AAX8 | YPLPTDGSRLVGQNQVITIP   | Negative |
| P0AAX8 | TASAVTYPLPTDGSRLVGQN   | Negative |
| P0AAX8 | LPTDGSRLVGQNQVITIPEG   | Negative |
| P0AAX8 | KLKTLFAAAFAVVGFCSTAS   | Negative |
| P0AAX8 | TYPLPTDGSRLVGQNQVITI   | Negative |
| P0AAX8 | STASAVTYPLPTDGSRLVGQ   | Negative |
| P0ABE7 | AILAVSSLVFSSASFAADLE   | Negative |
| P0ABE7 | VSSLVFSSASFAADLEDNME   | Negative |
| P0ABE7 | MRKSLLAILAVSSLVFSSAS   | Negative |
| P0ABE7 | VFSSASFAADLEDNMETLND   | Negative |
| P0ABE7 | NMETLNDNLKVIEKADNAAQ   | Negative |
| P0ABE7 | AVSSLVFSSASFAADLEDNM   | Negative |
| P0ABE7 | LAILAVSSLVFSSASFAADL   | Negative |
| P0ABE7 | METLNDNLKVIEKADNAAQV   | Negative |
| P0ABE7 | DLEDNMETLNDNLKVIEKAD   | Negative |
| P0ABE7 | SSASFAADLEDNMETLNDNL   | Negative |
| P0ABE7 | EDNMETLNDNLKVIEKADNA   | Negative |
| P0ABE7 | LAVSSLVFSSASFAADLEDN   | Negative |
| P0ABE7 | LEDNMETLNDNLKVIEKADN   | Negative |
| P0ABE7 | SSLVFSSASFAADLEDNMET   | Negative |
| P0ABE7 | SASFAADLEDNMETLNDNLK   | Negative |
| P0ABE7 | SLVFSSASFAADLEDNMETL   | Negative |
| P0ABE7 | FSSASFAADLEDNMETLNDN   | Negative |
| P0ABE7 | RKSLLAILAVSSLVFSSASF   | Negative |
| P0ABE7 | ADLEDNMETLNDNLKVIEKA   | Negative |
| P0ABE7 | SLLAILAVSSLVFSSASFAA   | Negative |
| P0ABE7 | ASFAADLEDNMETLNDNLKV   | Negative |

|        |                      |          |
|--------|----------------------|----------|
| P0ABE7 | SFAADLEDNMETLNDNLKVI | Negative |
| P0ABE7 | ETLNDNLKVIEKADNAAQVK | Negative |
| P0ABE7 | FAADLEDNMETLNDNLKVIE | Negative |
| P0ABE7 | DNMETLNDNLKVIEKADNAA | Negative |
| P0ABE7 | KSLAILAVSSLVFSSASFA  | Negative |
| P0ABE7 | AADLEDNMETLNDNLKVIEK | Negative |
| P0ABE7 | LLAILAVSSLVFSSASFAAD | Negative |
| P0ABE7 | LVFSSASFAADLEDNMETLN | Negative |
| P0ABK9 | IKINARRIFSLIPFFFFTS  | Negative |
| P0ABK9 | NARRIFSLIPFFFFTSVHA  | Negative |
| P0ABK9 | QTAAPAKPVTVEAKNETFAP | Negative |
| P0ABK9 | IFSLIPFFFFTSVHAEQTA  | Negative |
| P0ABK9 | RIKINARRIFSLIPFFFFT  | Negative |
| P0ABK9 | EQTAAPAKPVTVEAKNETFA | Negative |
| P0ABK9 | SVHAEQTAAPAKPVTVEAKN | Negative |
| P0ABK9 | LIPFFFFTSVHAEQTAAPAK | Negative |
| P0ABK9 | IPFFFFTSVHAEQTAAPAKP | Negative |
| P0ABK9 | TAAPAKPVTVEAKNETFAPQ | Negative |
| P0ABK9 | MTRIKINARRIFSLIPFFF  | Negative |
| P0ABK9 | PFFFFTSVHAEQTAAPAKPV | Negative |
| P0ABK9 | VHAEQTAAPAKPVTVEAKNE | Negative |
| P0ABK9 | LLIPFFFFTSVHAEQTAAPA | Negative |
| P0ABK9 | FFFFTSVHAEQTAAPAKPVT | Negative |
| P0ABK9 | AEQTAAPAKPVTVEAKNETF | Negative |
| P0ABK9 | ARRIFSLIPFFFFTSVHAE  | Negative |
| P0ABK9 | RRIFSLIPFFFFTSVHAEQ  | Negative |
| P0ABK9 | TRIKINARRIFSLIPFFFF  | Negative |
| P0ABK9 | FFTSVHAEQTAAPAKPVTVE | Negative |
| P0ABK9 | SLLIPFFFFTSVHAEQTAAP | Negative |
| P0ABK9 | INARRIFSLIPFFFFTSVH  | Negative |
| P0ABK9 | HAEQTAAPAKPVTVEAKNET | Negative |
| P0ABK9 | TSVHAEQTAAPAKPVTVEAK | Negative |
| P0ABK9 | KINARRIFSLIPFFFFTSV  | Negative |
| P0ABK9 | RIFSLIPFFFFTSVHAEQT  | Negative |
| P0ABK9 | FFFTSVHAEQTAAPAKPVTV | Negative |
| P0ABK9 | AAPAKPVTVEAKNETFAPQH | Negative |
| P0ABK9 | FTSVHAEQTAAPAKPVTVEA | Negative |
| P0ABL3 | VSGAVWAANGVDFSQSPEVS | Negative |
| P0ABL3 | LKKALCQWTAMLALVVSGAV | Negative |
| P0ABL3 | MLALVVSGAVWAANGVDFSQ | Negative |
| P0ABL3 | LALVVSGAVWAANGVDFSQS | Negative |
| P0ABL3 | MKSHDLKKALCQWTAMLALV | Negative |
| P0ABL3 | CQWTAMLALVVSGAVWAANG | Negative |
| P0ABL3 | ALVVSGAVWAANGVDFSQSP | Negative |
| P0ABL3 | KALCQWTAMLALVVSGAVWA | Negative |
| P0ABL3 | GVDFSQSPEVSGTQEGAIM  | Negative |

|        |                      |          |
|--------|----------------------|----------|
| P0ABL3 | LVVSGAVWAANGVDFSQSPE | Negative |
| P0ABL3 | AANGVDFSQSPEVSGTQEGA | Negative |
| P0ABL3 | VWAANGVDFSQSPEVSGTQE | Negative |
| P0ABL3 | SGAVWAANGVDFSQSPEVSG | Negative |
| P0ABL3 | AVWAANGVDFSQSPEVSGTQ | Negative |
| P0ABL3 | WAANGVDFSQSPEVSGTQEG | Negative |
| P0ABL3 | SHDLKKALCQWTAMLALVVS | Negative |
| P0ABL3 | KKALCQWTAMLALVVSGAVW | Negative |
| P0ABL3 | ANGVDFSQSPEVSGTQEGAI | Negative |
| P0ABL3 | LCQWTAMLALVVSGAVWAAN | Negative |
| P0ABL3 | VVSGAVWAANGVDFSQSPEV | Negative |
| P0ABL3 | ALCQWTAMLALVVSGAVWAA | Negative |
| P0ABL3 | TAMLALVVSGAVWAANGVDF | Negative |
| P0ABL3 | QWTAMLALVVSGAVWAANGV | Negative |
| P0ABL3 | NGVDFSQSPEVSGTQEGAIR | Negative |
| P0ABL3 | AMLALVVSGAVWAANGVDFS | Negative |
| P0ABL3 | HDLKKALCQWTAMLALVVSG | Negative |
| P0ABL3 | KSHDLKKALCQWTAMLALVV | Negative |
| P0ABL3 | DLKKALCQWTAMLALVVSGA | Negative |
| P0ABL3 | GAVWAANGVDFSQSPEVSGT | Negative |
| P0ABW7 | TMGASAVEKTISVTASVDPT | Negative |
| P0ABW7 | KKTIGAMALATLFATMGASA | Negative |
| P0ABW7 | ASAVEKTISVTASVDPTVDL | Negative |
| P0ABW7 | KTISVTASVDPTVDLLQSDG | Negative |
| P0ABW7 | LFATMGASAVEKTISVTASV | Negative |
| P0ABW7 | GASAVEKTISVTASVDPTVD | Negative |
| P0ABW7 | SAVEKTISVTASVDPTVDLL | Negative |
| P0ABW7 | GAMALATLFATMGASAVEKT | Negative |
| P0ABW7 | AVEKTISVTASVDPTVDLLQ | Negative |
| P0ABW7 | KTIGAMALATLFATMGASAV | Negative |
| P0ABW7 | LATLFATMGASAVEKTISVT | Negative |
| P0ABW7 | VEKTISVTASVDPTVDLLQS | Negative |
| P0ABW7 | ISVTASVDPTVDLLQSDGSA | Negative |
| P0ABW7 | TISVTASVDPTVDLLQSDGS | Negative |
| P0ABW7 | ATLFATMGASAVEKTISVTA | Negative |
| P0ABW7 | EKTISVTASVDPTVDLLQSD | Negative |
| P0ABW7 | TLFATMGASAVEKTISVTAS | Negative |
| P0ABW7 | KLKKTIGAMALATLFATMGA | Negative |
| P0ABW7 | ATMGASAVEKTISVTASVDP | Negative |
| P0ABW7 | SVTASVDPTVDLLQSDGSAL | Negative |
| P0ABW7 | MGASAVEKTISVTASVDPTV | Negative |
| P0ABW7 | IGAMALATLFATMGASAVEK | Negative |
| P0ABW7 | TIGAMALATLFATMGASAVE | Negative |
| P0ABW7 | ALATLFATMGASAVEKTISV | Negative |
| P0ABW7 | LKKTIGAMALATLFATMGAS | Negative |
| P0ABW7 | VTASVDPTVDLLQSDGSALP | Negative |

|        |                      |          |
|--------|----------------------|----------|
| P0ABW7 | MKLKKTIGAMALATLFATMG | Negative |
| P0ABW7 | MALATLFATMGASAVEKTIS | Negative |
| P0ABW7 | FATMGASAVEKTISVTASVD | Negative |
| P0ABZ6 | ANTSFAAPQVVDKVAAVVNN | Negative |
| P0ABZ6 | QVVDKVAAVVNNGVVLESDV | Negative |
| P0ABZ6 | AAPQVVDKVAAVVNNGVVLE | Negative |
| P0ABZ6 | NTSFAAPQVVDKVAAVVNNG | Negative |
| P0ABZ6 | IAMIANTSFAAPQVVDKVA  | Negative |
| P0ABZ6 | SFAAPQVVDKVAAVVNNGVV | Negative |
| P0ABZ6 | WKTLLLGIAMIANSTFAAPQ | Negative |
| P0ABZ6 | DKVAAVVNNGVVLESDVDGL | Negative |
| P0ABZ6 | KVAAVVNNGVVLESDVDGLM | Negative |
| P0ABZ6 | NWKTLLLGIAMIANSTFAAP | Negative |
| P0ABZ6 | KTLLLGIAMIANSTFAAPQV | Negative |
| P0ABZ6 | AVVNNGVVLESDVDGLMQSV | Negative |
| P0ABZ6 | KNWKTLLLGIAMIANSTFAA | Negative |
| P0ABZ6 | VDKVAAVVNNGVVLESDVDG | Negative |
| P0ABZ6 | LLGIAMIANSTFAAPQVVDK | Negative |
| P0ABZ6 | TSFAAPQVVDKVAAVVNNGV | Negative |
| P0ABZ6 | AMIANSTFAAPQVVDKVA   | Negative |
| P0ABZ6 | VVDKVAAVVNNGVVLESDVD | Negative |
| P0ABZ6 | GIAMIANSTFAAPQVVDKVA | Negative |
| P0ABZ6 | PQVVDKVAAVVNNGVVLESD | Negative |
| P0ABZ6 | LGIAMIANSTFAAPQVVDKV | Negative |
| P0ABZ6 | APQVVDKVAAVVNNGVVLES | Negative |
| P0ABZ6 | VAAVNNGVVLESDVDGLMQ  | Negative |
| P0ABZ6 | IANSTFAAPQVVDKVAAVVN | Negative |
| P0ABZ6 | MKNWKTLLLGIAMIANSTFA | Negative |
| P0ABZ6 | MIANSTFAAPQVVDKVA    | Negative |
| P0ABZ6 | LLLGIAMIANSTFAAPQVVD | Negative |
| P0ABZ6 | AAVNNGVVLESDVDGLMQS  | Negative |
| P0ABZ6 | FAAPQVVDKVAAVVNNGVVL | Negative |
| P0AD59 | GMMFKAITTVAALVIATSAM | Negative |
| P0AD59 | RISSGMMFKAITTVAALVI  | Negative |
| P0AD59 | AALVIATSAMAQDDLTISL  | Negative |
| P0AD59 | ATSAMAQDDLTISLAKGET  | Negative |
| P0AD59 | ISSGMMFKAITTVAALVIA  | Negative |
| P0AD59 | MFKAITTVAALVIATSAMAQ | Negative |
| P0AD59 | SSGMMFKAITTVAALVIAT  | Negative |
| P0AD59 | SGGMMFKAITTVAALVIATS | Negative |
| P0AD59 | QDDLTISLAKGETTKAAFN  | Negative |
| P0AD59 | TVAALVIATSAMAQDDLTIS | Negative |
| P0AD59 | FKAITTVAALVIATSAMAQD | Negative |
| P0AD59 | DDLTISLAKGETTKAAFNQ  | Negative |
| P0AD59 | TTVAALVIATSAMAQDDLT  | Negative |
| P0AD59 | AMAQDDLTISLAKGETTKA  | Negative |

|        |                      |          |
|--------|----------------------|----------|
| P0AD59 | GRISSGGMMFKAITTVAALV | Negative |
| P0AD59 | AQDDLTISSLAKGETTKAAF | Negative |
| P0AD59 | TSAMAQDDLTISSLAKGETT | Negative |
| P0AD59 | MMFKAITTVAALVIATSAMA | Negative |
| P0AD59 | IATSAMAQDDLTISSLAKGE | Negative |
| P0AD59 | AITTVAALVIATSAMAQDDL | Negative |
| P0AD59 | LVIATSAMAQDDLTISSLAK | Negative |
| P0AD59 | SAMAQDDLTISSLAKGETTK | Negative |
| P0AD59 | ALVIATSAMAQDDLTISSLA | Negative |
| P0AD59 | MAQDDLTISSLAKGETTKAA | Negative |
| P0AD59 | VAALVIATSAMAQDDLTISS | Negative |
| P0AD59 | KAITTVAALVIATSAMAQDD | Negative |
| P0AD59 | MGRISSGGMMFKAITTVAAL | Negative |
| P0AD59 | VIATSAMAQDDLTISSLAKG | Negative |
| P0AD59 | GGMMFKAITTVAALVIATSA | Negative |
| P0AD70 | KRSLLFSAVLCAASLTSVHA | Negative |
| P0AD70 | EPEFASDIVDRYADHIFYGS | Negative |
| P0AD70 | AQPITEPEFASDIVDRYADH | Negative |
| P0AD70 | RSLLFSAVLCAASLTSVHAA | Negative |
| P0AD70 | ITEPEFASDIVDRYADHIFY | Negative |
| P0AD70 | SLLFSAVLCAASLTSVHAAQ | Negative |
| P0AD70 | AVLCAASLTSVHAAQPITEP | Negative |
| P0AD70 | SAVLCAASLTSVHAAQPITE | Negative |
| P0AD70 | MKRSLLFSAVLCAASLTSVH | Negative |
| P0AD70 | QPITEPEFASDIVDRYADHI | Negative |
| P0AD70 | FASDIVDRYADHIFYGSGAT | Negative |
| P0AD70 | LTSVHAAQPITEPEFASDIV | Negative |
| P0AD70 | LLFSAVLCAASLTSVHAAQP | Negative |
| P0AD70 | LCAASLTSVHAAQPITEPEF | Negative |
| P0AD70 | VHAAQPITEPEFASDIVDRY | Negative |
| P0AD70 | VLCAASLTSVHAAQPITEPE | Negative |
| P0AD70 | AASLTSVHAAQPITEPEFAS | Negative |
| P0AD70 | TSVHAAQPITEPEFASDIVD | Negative |
| P0AD70 | SLTSVHAAQPITEPEFASDI | Negative |
| P0AD70 | SVHAAQPITEPEFASDIVDR | Negative |
| P0AD70 | ASLTSVHAAQPITEPEFASD | Negative |
| P0AD70 | LFSAVLCAASLTSVHAAQPI | Negative |
| P0AD70 | PEFASDIVDRYADHIFYGSG | Negative |
| P0AD70 | PITEPEFASDIVDRYADHIF | Negative |
| P0AD70 | CAASLTSVHAAQPITEPEFA | Negative |
| P0AD70 | TEPEFASDIVDRYADHIFYG | Negative |
| P0AD70 | AAQPITEPEFASDIVDRYAD | Negative |
| P0AD70 | EFASDIVDRYADHIFYGSGA | Negative |
| P0AD70 | HAAQPITEPEFASDIVDRYA | Negative |
| P0AD96 | AEDIKVAVVGAMSGPVAQYG | Negative |
| P0AD96 | IALAFSNMALAEDIKVAVVG | Negative |

|        |                       |          |
|--------|-----------------------|----------|
| P0AD96 | MALAEDIKVAVVGAMSGPVA  | Negative |
| P0AD96 | GCIALAFSNMALAEDIKVAV  | Negative |
| P0AD96 | VAVVGAMSGPVAQYGDQEFT  | Negative |
| P0AD96 | SNMALAEDIKVAVVGAMSGP  | Negative |
| P0AD96 | LAFSNMALAEDIKVAVVGAM  | Negative |
| P0AD96 | CIALAFSNMALAEDIKVAVV  | Negative |
| P0AD96 | ALAEDIKVAVVGAMSGPVAQ  | Negative |
| P0AD96 | GKALLAGCIALAFSNMALAE  | Negative |
| P0AD96 | AGCIALAFSNMALAEDIKVA  | Negative |
| P0AD96 | AVVGAMSGPVAQYGDQEFTG  | Negative |
| P0AD96 | KGKALLAGCIALAFSNMALA  | Negative |
| P0AD96 | KVAVVGAMSGPVAQYGDQEF  | Negative |
| P0AD96 | ALAFSNMALAEDIKVAVVGA  | Negative |
| P0AD96 | KALLAGCIALAFSNMALAED  | Negative |
| P0AD96 | IKGKALLAGCIALAFSNMAL  | Negative |
| P0AD96 | NIKGKALLAGCIALAFSNMA  | Negative |
| P0AD96 | IKVAVVGAMSGPVAQYGDQE  | Negative |
| P0AD96 | FSNMALAEDIKVAVVGAMSG  | Negative |
| P0AD96 | MNIKGKALLAGCIALAFSNM  | Negative |
| P0AD96 | EDIKVAVVGAMSGPVAQYGD  | Negative |
| P0AD96 | LAEDIKVAVVGAMSGPVAQY  | Negative |
| P0AD96 | ALLAGCIALAFSNMALAEDI  | Negative |
| P0AD96 | AFSNMALAEDIKVAVVGAMS  | Negative |
| P0AD96 | NMALAEDIKVAVVGAMSGPV  | Negative |
| P0AD96 | DIKVAVVGAMSGPVAQYGDQ  | Negative |
| P0AD96 | LLAGCIALAFSNMALAEDIK  | Negative |
| P0AD96 | VVGAMSGPVAQYGDQEFTGA  | Negative |
| P0ADA1 | FLVLLTFRAAAADTLLILGD  | Negative |
| P0ADA1 | LVLLTFRAAAADTLLILGDS  | Negative |
| P0ADA1 | RAAAADTLLILGDSLSAGYR  | Negative |
| P0ADA1 | LFLVLLTFRAAAADTLLILG  | Negative |
| P0ADA1 | FLFLVLLTFRAAAADTLLIL  | Negative |
| P0ADA1 | LTFRAAAADTLLILGDSLSA  | Negative |
| P0ADA1 | PFLFLVLLTFRAAAADTLLI  | Negative |
| P0ADA1 | AAAADTLLILGDSLSAGYRM  | Negative |
| P0ADA1 | TLLILGDSLSAGYRMSASAA  | Negative |
| P0ADA1 | VLLTFRAAAADTLLILGDSL  | Negative |
| P0ADA1 | FNNVFRWHLPFLFLVLLTFR  | Negative |
| P0ADA1 | FRWHL PFLFLVLLTFRAAAA | Negative |
| P0ADA1 | MNFNNVFRWHL PFLFLVLLT | Negative |
| P0ADA1 | NNVFRWHL PFLFLVLLTFRA | Negative |
| P0ADA1 | LLILGDSLSAGYRMSASA AW | Negative |
| P0ADA1 | LLTFRAAAADTLLILGDSLS  | Negative |
| P0ADA1 | VFRWHL PFLFLVLLTFRAAA | Negative |
| P0ADA1 | RWHL PFLFLVLLTFRAAAD  | Negative |
| P0ADA1 | NVFRWHL PFLFLVLLTFRAA | Negative |

|        |                      |          |
|--------|----------------------|----------|
| P0ADA1 | FRAAAADTLLILGDSLSAGY | Negative |
| P0ADA1 | AADTLLILGDSLSAGYRMSA | Negative |
| P0ADA1 | ADTLLILGDSLSAGYRMSAS | Negative |
| P0ADA1 | AAADTLLILGDSLSAGYRMS | Negative |
| P0ADA1 | WHLPFLFLVLLTFRAAAADT | Negative |
| P0ADA1 | HLPFLFLVLLTFRAAAADTL | Negative |
| P0ADA1 | NFNNVFRWHLPFLFLVLLTF | Negative |
| P0ADA1 | MMNFNNVFRWHLPFLFLVLL | Negative |
| P0ADA1 | DTLLILGDSLSAGYRMSASA | Negative |
| P0ADA1 | TFRAAAADTLLILGDSLSAG | Negative |
| P0ADU5 | SAPVMAAEQGGFSGPSATQS | Negative |
| P0ADU5 | GFSGPSATQSQAGGFQGPNG | Negative |
| P0ADU5 | EQGGFSGPSATQSQAGGFQG | Negative |
| P0ADU5 | SGPSATQSQAGGFQGPNGSV | Negative |
| P0ADU5 | PSATQSQAGGFQGPNGSVTT | Negative |
| P0ADU5 | VMALCSAPVMAAEQGGFSGP | Negative |
| P0ADU5 | APVMAAEQGGFSGPSATQSQ | Negative |
| P0ADU5 | VMAAEQGGFSGPSATQSQAG | Negative |
| P0ADU5 | MAAEQGGFSGPSATQSQAGG | Negative |
| P0ADU5 | IAVMALCSAPVMAAEQGGFS | Negative |
| P0ADU5 | AVMALCSAPVMAAEQGGFSG | Negative |
| P0ADU5 | AAEQGGFSGPSATQSQAGGF | Negative |
| P0ADU5 | LCSAPVMAAEQGGFSGPSAT | Negative |
| P0ADU5 | QGGFSGPSATQSQAGGFQGP | Negative |
| P0ADU5 | PVMAAEQGGFSGPSATQSQA | Negative |
| P0ADU5 | KFAAVIAVMALCSAPVMAAE | Negative |
| P0ADU5 | CSAPVMAAEQGGFSGPSATQ | Negative |
| P0ADU5 | FAAVIAVMALCSAPVMAAEQ | Negative |
| P0ADU5 | MKKFAAVIAVMALCSAPVMA | Negative |
| P0ADU5 | MALCSAPVMAAEQGGFSGPS | Negative |
| P0ADU5 | FSGPSATQSQAGGFQGPNGS | Negative |
| P0ADU5 | KKFAAVIAVMALCSAPVMAA | Negative |
| P0ADU5 | AEQGGFSGPSATQSQAGGFQ | Negative |
| P0ADU5 | VIAVMALCSAPVMAAEQGGF | Negative |
| P0ADU5 | SATQSQAGGFQGPNGSVTTV | Negative |
| P0ADU5 | GPSATQSQAGGFQGPNGSVT | Negative |
| P0ADU5 | ALCSAPVMAAEQGGFSGPSA | Negative |
| P0ADU5 | GGFSGPSATQSQAGGFQGP  | Negative |
| P0ADU5 | AAVIAVMALCSAPVMAAEQG | Negative |
| P0AE22 | ALASSPSPLNPGTNVARLAE | Negative |
| P0AE22 | LLFALNSSAVALASSPSPLN | Negative |
| P0AE22 | ASSPSPLNPGTNVARLAEQA | Negative |
| P0AE22 | SSAVALASSPSPLNPGTNVA | Negative |
| P0AE22 | ISAVCLLFALNSSAVALASS | Negative |
| P0AE22 | SPLNPGTNVARLAEQAPIHW | Negative |
| P0AE22 | AVALASSPSPLNPGTNVARL | Negative |



|        |                       |          |
|--------|-----------------------|----------|
| P0AE22 | LFALNSSAVALASSPSPLNP  | Negative |
| P0AE22 | NSSAVALASSPSPLNPGTNV  | Negative |
| P0AE22 | RKITQAISAVCLLFALNSSA  | Negative |
| P0AE22 | AISAVCLLFALNSSAVALAS  | Negative |
| P0AE22 | ITQAISAVCLLFALNSSAVA  | Negative |
| P0AE22 | FALNSSAVALASSPSPLNPG  | Negative |
| P0AE22 | QAISAVCLLFALNSSAVALA  | Negative |
| P0AE22 | VALASSPSPLNPGTNVARLA  | Negative |
| P0AE22 | LASSPSPLNPGTNVARLAEQ  | Negative |
| P0AE22 | PLNPGTNVARLAEQAPIHWV  | Negative |
| P0AE22 | CLLFALNSSAVALASSPSPL  | Negative |
| P0AE22 | SSPSPLNPGTNVARLAEQAP  | Negative |
| P0AE22 | MRKITQAISAVCLLFALNSS  | Negative |
| P0AE22 | AVCLLFALNSSAVALASSPS  | Negative |
| P0AE22 | ALNSSAVALASSPSPLNPGT  | Negative |
| P0AE22 | SAVALASSPSPLNPGTNVAR  | Negative |
| P0AE22 | LNSSAVALASSPSPLNPGTN  | Negative |
| P0AE22 | SPSPLNPGTNVARLAEQAPI  | Negative |
| P0AE22 | SAVCLLFALNSSAVALASSP  | Negative |
| P0AE22 | TQAISAVCLLFALNSSAVAL  | Negative |
| P0AE22 | PSPLNPGTNVARLAEQAPIH  | Negative |
| P0AE22 | KITQAISAVCLLFALNSSAV  | Negative |
| P0AEB2 | TALCTAFISAAHADDLNIKT  | Negative |
| P0AEB2 | IMKRLALTALCTAFISAAH   | Negative |
| P0AEB2 | ALTALCTAFISAAHADDLN   | Negative |
| P0AEB2 | SAAHADDLNIKTMI PGVPQI | Negative |
| P0AEB2 | ALCTAFISAAHADDLNIKTM  | Negative |
| P0AEB2 | FISAAHADDLNIKTMI PGVP | Negative |
| P0AEB2 | MNTIFSARIMKRLALTALC   | Negative |
| P0AEB2 | AHADDLNIKTMI PGVPQIDA | Negative |
| P0AEB2 | AFISAAHADDLNIKTMI PGV | Negative |
| P0AEB2 | CTAFISAAHADDLNIKTMIP  | Negative |
| P0AEB2 | TIFSARIMKRLALTALCTA   | Negative |
| P0AEB2 | SARIMKRLALTALCTAFIS   | Negative |
| P0AEB2 | LCTAFISAAHADDLNIKTM   | Negative |
| P0AEB2 | RLALTALCTAFISAAHADD   | Negative |
| P0AEB2 | TTALCTAFISAAHADDLNIK  | Negative |
| P0AEB2 | MKRLALTALCTAFISAAHA   | Negative |
| P0AEB2 | ADDLNIKTMI PGVPQIDAE  | Negative |
| P0AEB2 | LALTALCTAFISAAHADDL   | Negative |
| P0AEB2 | ARIMKRLALTALCTAFISA   | Negative |
| P0AEB2 | KRLALTALCTAFISAAHAD   | Negative |
| P0AEB2 | FSARIMKRLALTALCTAFI   | Negative |
| P0AEB2 | NTIFSARIMKRLALTALCT   | Negative |
| P0AEB2 | RIMKRLALTALCTAFISAA   | Negative |
| P0AEB2 | HADDLNIKTMI PGVPQIDAE | Negative |

|        |                       |          |
|--------|-----------------------|----------|
| P0AEB2 | DDLNIKTMI PGVPQIDAESY | Negative |
| P0AEB2 | IFSARIMKRLALTTALCTAF  | Negative |
| P0AEB2 | ISAAHADDLNIKTMI PGVPQ | Negative |
| P0AEB2 | AAHADDLNIKTMI PGVPQID | Negative |
| P0AEB2 | TAFISAAHADDLNIKTMI PG | Negative |
| P0AEE5 | GVTIYKYDDNFMSVVRKAIE  | Negative |
| P0AEE5 | AADTRIGVTIYKYDDNFMSV  | Negative |
| P0AEE5 | AHAADTRIGVTIYKYDDNFM  | Negative |
| P0AEE5 | IGVTIYKYDDNFMSVVRKAI  | Negative |
| P0AEE5 | SMLFGAAHAADTRIGVTIY   | Negative |
| P0AEE5 | LSAVMASMLFGAAHAADTR   | Negative |
| P0AEE5 | AAHAADTRIGVTIYKYDDN   | Negative |
| P0AEE5 | MLFGAAHAADTRIGVTIYK   | Negative |
| P0AEE5 | VMASMLFGAAHAADTRIGV   | Negative |
| P0AEE5 | HAADTRIGVTIYKYDDNFMS  | Negative |
| P0AEE5 | GAAHAADTRIGVTIYKYDD   | Negative |
| P0AEE5 | ASMLFGAAHAADTRIGVTI   | Negative |
| P0AEE5 | KKVLTL SAVMASMLFGAAH  | Negative |
| P0AEE5 | KVLTL SAVMASMLFGAAHA  | Negative |
| P0AEE5 | DTRIGVTIYKYDDNFMSVVR  | Negative |
| P0AEE5 | TRIGVTIYKYDDNFMSVVRK  | Negative |
| P0AEE5 | AVMASMLFGAAHAADTRIG   | Negative |
| P0AEE5 | LFGAAHAADTRIGVTIYKY   | Negative |
| P0AEE5 | TL SAVMASMLFGAAHAADT  | Negative |
| P0AEE5 | FGAAHAADTRIGVTIYKYD   | Negative |
| P0AEE5 | LTL SAVMASMLFGAAHAAD  | Negative |
| P0AEE5 | VTIYKYDDNFMSVVRKAIEQ  | Negative |
| P0AEE5 | ADTRIGVTIYKYDDNFMSVV  | Negative |
| P0AEE5 | AAHAADTRIGVTIYKYDDNF  | Negative |
| P0AEE5 | VLTL SAVMASMLFGAAHA   | Negative |
| P0AEE5 | MNKKVLTL SAVMASMLFGAA | Negative |
| P0AEE5 | RIGVTIYKYDDNFMSVVRKA  | Negative |
| P0AEE5 | NKKVLTL SAVMASMLFGAAA | Negative |
| P0AEE5 | MASMLFGAAHAADTRIGVT   | Negative |
| P0AEG4 | LAGLVLA FSASAAQYEDGKQ | Negative |
| P0AEG4 | TLEKPVAGAPQVLEFFSFFC  | Negative |
| P0AEG4 | MKKIWLALAGLVLA FSASAA | Negative |
| P0AEG4 | ALAGLVLA FSASAAQYEDGK | Negative |
| P0AEG4 | FSASAAQYEDGKQYTTLEKP  | Negative |
| P0AEG4 | SASAAQYEDGKQYTTLEKPV  | Negative |
| P0AEG4 | IWLALAGLVLA FSASAAQYE | Negative |
| P0AEG4 | VLA FSASAAQYEDGKQYTTL | Negative |
| P0AEG4 | KKIWLALAGLVLA FSASAAQ | Negative |
| P0AEG4 | GLVLA FSASAAQYEDGKQYT | Negative |
| P0AEG4 | LALAGLVLA FSASAAQYEDG | Negative |
| P0AEG4 | LVLA FSASAAQYEDGKQYTT | Negative |

|        |                      |          |
|--------|----------------------|----------|
| P0AEG4 | AGLVLAFSASAAQYEDGKQY | Negative |
| P0AEG4 | SAAQYEDGKQYTTLEKPVAG | Negative |
| P0AEG4 | ASAAQYEDGKQYTTLEKPVA | Negative |
| P0AEG4 | AQYEDGKQYTTLEKPVAGAP | Negative |
| P0AEG4 | TTLEKPVAGAPQVLEFFSFF | Negative |
| P0AEG4 | AFSASAAQYEDGKQYTTLEK | Negative |
| P0AEG4 | QYEDGKQYTTLEKPVAGAPQ | Negative |
| P0AEG4 | KQYTTLEKPVAGAPQVLEFF | Negative |
| P0AEG4 | GKQYTTLEKPVAGAPQVLEF | Negative |
| P0AEG4 | AAQYEDGKQYTTLEKPVAGA | Negative |
| P0AEG4 | EDGKQYTTLEKPVAGAPQVL | Negative |
| P0AEG4 | QYTTLEKPVAGAPQVLEFFS | Negative |
| P0AEG4 | LAFSASAAQYEDGKQYTTLE | Negative |
| P0AEG4 | YTTLEKPVAGAPQVLEFFSF | Negative |
| P0AEG4 | YEDGKQYTTLEKPVAGAPQV | Negative |
| P0AEG4 | KIWLALAGLVLAFSASAAQY | Negative |
| P0AEG4 | DGKQYTTLEKPVAGAPQVLE | Negative |
| P0AEG6 | KGFMLFTLLAAFSGFAQADD | Negative |
| P0AEG6 | LFTLLAAFSGFAQADDAAIQ | Negative |
| P0AEG6 | LAAFSGFAQADDAAIQQTLA | Negative |
| P0AEG6 | DDAAIQQTLAKMGIKSSDIQ | Negative |
| P0AEG6 | AKMGIKSSDIQPAPVAGMKT | Negative |
| P0AEG6 | LLAAFSGFAQADDAAIQQTL | Negative |
| P0AEG6 | FTLLAAFSGFAQADDAAIQQ | Negative |
| P0AEG6 | GFAQADDAAIQQTLAKMGIK | Negative |
| P0AEG6 | ADDAAIQQTLAKMGIKSSDI | Negative |
| P0AEG6 | AFSGFAQADDAAIQQTLAKM | Negative |
| P0AEG6 | DAAIQQTLAKMGIKSSDIQP | Negative |
| P0AEG6 | FAQADDAAIQQTLAKMGIKS | Negative |
| P0AEG6 | AAIQQTLAKMGIKSSDIQPA | Negative |
| P0AEG6 | QADDAAIQQTLAKMGIKSSD | Negative |
| P0AEG6 | TLLAAFSGFAQADDAAIQQT | Negative |
| P0AEG6 | MKKGFMLFTLLAAFSGFAQA | Negative |
| P0AEG6 | GFMLFTLLAAFSGFAQADDA | Negative |
| P0AEG6 | AAFSGFAQADDAAIQQTLAK | Negative |
| P0AEG6 | FMLFTLLAAFSGFAQADDAA | Negative |
| P0AEG6 | LAKMGIKSSDIQPAPVAGMK | Negative |
| P0AEG6 | QTLAKMGIKSSDIQPAPVAG | Negative |
| P0AEG6 | FSGFAQADDAAIQQTLAKMG | Negative |
| P0AEG6 | SGFAQADDAAIQQTLAKMGI | Negative |
| P0AEG6 | AIQQTLAKMGIKSSDIQPAP | Negative |
| P0AEG6 | QQTLAKMGIKSSDIQPAPVA | Negative |
| P0AEG6 | IQQTLAKMGIKSSDIQPAPV | Negative |
| P0AEG6 | KKGFMLFTLLAAFSGFAQAD | Negative |
| P0AEG6 | TLAKMGIKSSDIQPAPVAGM | Negative |
| P0AEG6 | AQADDAAIQQTLAKMGIKSS | Negative |

|        |                      |          |
|--------|----------------------|----------|
| P0AEM9 | FADEGLLNKVKERGTLVGL  | Negative |
| P0AEM9 | DEGLLNKVKERGTLVGLEG  | Negative |
| P0AEM9 | GMSVKSFADEGLLNKVKERG | Negative |
| P0AEM9 | GRQALMGVMAVALVAGMSVK | Negative |
| P0AEM9 | GVMAVALVAGMSVKSFADEG | Negative |
| P0AEM9 | RQALMGVMAVALVAGMSVKS | Negative |
| P0AEM9 | MKLAHLGRQALMGVMAVALV | Negative |
| P0AEM9 | ALVAGMSVKSFADEGLLNKV | Negative |
| P0AEM9 | AGMSVKSFADEGLLNKVKER | Negative |
| P0AEM9 | AVALVAGMSVKSFADEGLLN | Negative |
| P0AEM9 | QALMGVMAVALVAGMSVKSF | Negative |
| P0AEM9 | LAHLGRQALMGVMAVALVAG | Negative |
| P0AEM9 | VAGMSVKSFADEGLLNKVKE | Negative |
| P0AEM9 | ALMGVMAVALVAGMSVKSFA | Negative |
| P0AEM9 | VKSFADEGLLNKVKERGTL  | Negative |
| P0AEM9 | LGRQALMGVMAVALVAGMSV | Negative |
| P0AEM9 | MGVMAVALVAGMSVKSFADE | Negative |
| P0AEM9 | HLGRQALMGVMAVALVAGMS | Negative |
| P0AEM9 | LMGVMAVALVAGMSVKSFAD | Negative |
| P0AEM9 | VMAVALVAGMSVKSFADEGL | Negative |
| P0AEM9 | AHLGRQALMGVMAVALVAGM | Negative |
| P0AEM9 | SVKSFADEGLLNKVKERGTL | Negative |
| P0AEM9 | MSVKSFADEGLLNKVKERG  | Negative |
| P0AEM9 | SFADEGLLNKVKERGTLVG  | Negative |
| P0AEM9 | ADEGLLNKVKERGTLVGLE  | Negative |
| P0AEM9 | LVAGMSVKSFADEGLLNKVK | Negative |
| P0AEM9 | VALVAGMSVKSFADEGLLNK | Negative |
| P0AEM9 | KSFADEGLLNKVKERGTLV  | Negative |
| P0AEM9 | KLAHLGRQALMGVMAVALVA | Negative |
| P0AEQ3 | VATDTAFVPFEFKQGDYVG  | Negative |
| P0AEQ3 | ATDTAFVPFEFKQGDYVGF  | Negative |
| P0AEQ3 | SHAADKKLVVATDTAFVPFE | Negative |
| P0AEQ3 | SSHAADKKLVVATDTAFVPF | Negative |
| P0AEQ3 | KVSLAALTAFVSSHAADK   | Negative |
| P0AEQ3 | VSLAALTAFVSSHAADKK   | Negative |
| P0AEQ3 | AALTAFVSSHAADKKLVV   | Negative |
| P0AEQ3 | KSVLKVSLAALTAFVSSH   | Negative |
| P0AEQ3 | ALTAFVSSHAADKKLVVA   | Negative |
| P0AEQ3 | AADKKLVVATDTAFVPFEFK | Negative |
| P0AEQ3 | SVLKVSLAALTAFVSSHA   | Negative |
| P0AEQ3 | ADKKLVVATDTAFVPFEFKQ | Negative |
| P0AEQ3 | LKVSLAALTAFVSSHAAD   | Negative |
| P0AEQ3 | AFVSSHAADKKLVVATDTA  | Negative |
| P0AEQ3 | HAADKKLVVATDTAFVPFEF | Negative |
| P0AEQ3 | LAFVSSHAADKKLVVATDT  | Negative |
| P0AEQ3 | VLKVSLAALTAFVSSHAA   | Negative |

|        |                       |          |
|--------|-----------------------|----------|
| P0AEQ3 | MKSVLKVSLAALTLAFAVSS  | Negative |
| P0AEQ3 | TLAFAVSSHAADKKLVVATD  | Negative |
| P0AEQ3 | KLVVATDTAFVPFEFKQGDK  | Negative |
| P0AEQ3 | LTLAFAVSSHAADKKLVVAT  | Negative |
| P0AEQ3 | KKLVVATDTAFVPFEFKQGD  | Negative |
| P0AEQ3 | AVSSHAADKKLVVATDTAFV  | Negative |
| P0AEQ3 | DKKLVVATDTAFVPFEFKQG  | Negative |
| P0AEQ3 | VSSHAADKKLVVATDTAFVP  | Negative |
| P0AEQ3 | LAALTLAFAVSSHAADKKLV  | Negative |
| P0AEQ3 | VVATDTAFVPFEFKQGDKYV  | Negative |
| P0AEQ3 | FAVSSHAADKKLVVATDTAF  | Negative |
| P0AEQ3 | LVVATDTAFVPFEFKQGDKY  | Negative |
| P0AEU0 | AAIPQNIRIGTDPTYAPFES  | Negative |
| P0AEU0 | FSSATAAFAAIPQNIRIGTD  | Negative |
| P0AEU0 | VLAFFSATAAFAAIPQNIRI  | Negative |
| P0AEU0 | AIPQNIRIGTDPTYAPFESK  | Negative |
| P0AEU0 | IGTDPTYAPFESKNSQGELV  | Negative |
| P0AEU0 | IPQNIRIGTDPTYAPFESKN  | Negative |
| P0AEU0 | LVLSLSLVLAFFSATAAFAA  | Negative |
| P0AEU0 | AFAAIPQNIRIGTDPTYAPF  | Negative |
| P0AEU0 | NIRIGTDPTYAPFESKNSQG  | Negative |
| P0AEU0 | RIGTDPTYAPFESKNSQGEL  | Negative |
| P0AEU0 | SLSLVLAFFSATAAFAAIPQ  | Negative |
| P0AEU0 | MKKLVLSLSLVLAFFSATAA  | Negative |
| P0AEU0 | PQNIRIGTDPTYAPFESKNS  | Negative |
| P0AEU0 | FAAIPQNIRIGTDPTYAPFE  | Negative |
| P0AEU0 | QNIRIGTDPTYAPFESKNSQ  | Negative |
| P0AEU0 | SLVLAFFSATAAFAAIPQNI  | Negative |
| P0AEU0 | VLSLSLVLAFFSATAAFAAI  | Negative |
| P0AEU0 | IRIGTDPTYAPFESKNSQGE  | Negative |
| P0AEU0 | LVLAFFSATAAFAAIPQNIR  | Negative |
| P0AEU0 | AFSSATAAFAAIPQNIRIGT  | Negative |
| P0AEU0 | SATAAFAAIPQNIRIGTDPT  | Negative |
| P0AEU0 | KLVLSSLSLVLAFFSATAAFA | Negative |
| P0AEU0 | SSATAAFAAIPQNIRIGTDP  | Negative |
| P0AEU0 | KKLVLSLSLVLAFFSATAAF  | Negative |
| P0AEU0 | TAAFAAIPQNIRIGTDPTYA  | Negative |
| P0AEU0 | ATAAFAAIPQNIRIGTDPTY  | Negative |
| P0AEU0 | LSLSLVLAFFSATAAFAAIP  | Negative |
| P0AEU0 | AAFAAIPQNIRIGTDPTYAP  | Negative |
| P0AEU0 | LAFFSATAAFAAIPQNIRIG  | Negative |
| P0AEU7 | DKIAIVNMGSLFQQVAQKTG  | Negative |
| P0AEU7 | ALATSAQAADKIAIVNMGSL  | Negative |
| P0AEU7 | LATSAQAADKIAIVNMGSLF  | Negative |
| P0AEU7 | AIVNMGSLFQQVAQKTGVSN  | Negative |
| P0AEU7 | AGLGLALATSAQAADKIAIV  | Negative |

|        |                      |          |
|--------|----------------------|----------|
| P0AEU7 | IVNMGSLFQQVAQKTGVSNT | Negative |
| P0AEU7 | GLGLALATSAQAADKIAIVN | Negative |
| P0AEU7 | SAQAADKIAIVNMGSLFQQV | Negative |
| P0AEU7 | LGLALATSAQAADKIAIVNM | Negative |
| P0AEU7 | WLLAAGLGLALATSAQAADK | Negative |
| P0AEU7 | GLALATSAQAADKIAIVNMG | Negative |
| P0AEU7 | AADKIAIVNMGSLFQQVAQK | Negative |
| P0AEU7 | AQAADKIAIVNMGSLFQQVA | Negative |
| P0AEU7 | IAIVNMGSLFQQVAQKTGVS | Negative |
| P0AEU7 | KIAIVNMGSLFQQVAQKTGV | Negative |
| P0AEU7 | KKWLLAAGLGLALATSAQAA | Negative |
| P0AEU7 | AAGLGLALATSAQAADKIAI | Negative |
| P0AEU7 | LLAAGLGLALATSAQAADKI | Negative |
| P0AEU7 | LALATSAQAADKIAIVNMGS | Negative |
| P0AEU7 | KWLLAAGLGLALATSAQAAD | Negative |
| P0AEU7 | VNMGSLFQQVAQKTGVSNTL | Negative |
| P0AEU7 | NMGSLFQQVAQKTGVSNTLE | Negative |
| P0AEU7 | MKKWLLAAGLGLALATSAQA | Negative |
| P0AEU7 | GSLFQQVAQKTGVSNTLENE | Negative |
| P0AEU7 | QAADKIAIVNMGSLFQQVAQ | Negative |
| P0AEU7 | ADKIAIVNMGSLFQQVAQKT | Negative |
| P0AEU7 | MGSLFQQVAQKTGVSNTLEN | Negative |
| P0AEU7 | ATSAQAADKIAIVNMGSLFQ | Negative |
| P0AEU7 | TSAQAADKIAIVNMGSLFQQ | Negative |
| P0AEX9 | MMFSASALAKIEEGKLVWI  | Negative |
| P0AEX9 | TTMMFSASALAKIEEGKLV  | Negative |
| P0AEX9 | LAKIEEGKLVWINGDKGYN  | Negative |
| P0AEX9 | ILALSALTMMFSASALAKI  | Negative |
| P0AEX9 | FSASALAKIEEGKLVWING  | Negative |
| P0AEX9 | KIEEGKLVWINGDKGYNGL  | Negative |
| P0AEX9 | SALAKIEEGKLVWINGDKG  | Negative |
| P0AEX9 | EEGKLVWINGDKGYNGLAE  | Negative |
| P0AEX9 | TGARILALSALTMMFSASA  | Negative |
| P0AEX9 | EGKLVWINGDKGYNGLAEV  | Negative |
| P0AEX9 | SASALAKIEEGKLVWINGD  | Negative |
| P0AEX9 | LTTMMFSASALAKIEEGKLV | Negative |
| P0AEX9 | RILALSALTMMFSASALAK  | Negative |
| P0AEX9 | ARILALSALTMMFSASALA  | Negative |
| P0AEX9 | ALTMMFSASALAKIEEGKL  | Negative |
| P0AEX9 | IKTGARILALSALTMMFSA  | Negative |
| P0AEX9 | ASALAKIEEGKLVWINGDK  | Negative |
| P0AEX9 | AKIEEGKLVWINGDKGYNG  | Negative |
| P0AEX9 | ALAKIEEGKLVWINGDKGY  | Negative |
| P0AEX9 | ALSALTMMFSASALAKIEE  | Negative |
| P0AEX9 | MKIKTGARILALSALTMMF  | Negative |
| P0AEX9 | LALSALTMMFSASALAKIE  | Negative |

|        |                        |          |
|--------|------------------------|----------|
| P0AEX9 | SALTTMMFSASALAKIEEGK   | Negative |
| P0AEX9 | KTGARILALSALTTMMFSAS   | Negative |
| P0AEX9 | MFSASALAKIEEGKLVWIN    | Negative |
| P0AEX9 | KIKTGARILALSALTTMMFS   | Negative |
| P0AEX9 | GARILALSALTTMMFSASAL   | Negative |
| P0AEX9 | TMMFSASALAKIEEGKLVW    | Negative |
| P0AEX9 | IEEGKLVWINGDKGYNGLA    | Negative |
| P0AFH8 | TLLAVMLTSAVATGSAYAEN   | Negative |
| P0AFH8 | MTRLKISKTLTLLAVMLTSAVA | Negative |
| P0AFH8 | AYAENNAQTTNESAGQKVDS   | Negative |
| P0AFH8 | GSAYAENNAQTTNESAGQKV   | Negative |
| P0AFH8 | LAVMLTSAVATGSAYAENNA   | Negative |
| P0AFH8 | SKTLLAVMLTSAVATGSAYA   | Negative |
| P0AFH8 | ENNAQTTNESAGQKVDSSMN   | Negative |
| P0AFH8 | ISKTLTLLAVMLTSAVATGSAY | Negative |
| P0AFH8 | NNAQTTNESAGQKVDSSMNK   | Negative |
| P0AFH8 | LLAVMLTSAVATGSAYAENN   | Negative |
| P0AFH8 | SAVATGSAYAENNAQTTNES   | Negative |
| P0AFH8 | TMTRLKISKTLTLLAVMLTSAV | Negative |
| P0AFH8 | TGSAYAENNAQTTNESAGQK   | Negative |
| P0AFH8 | KISKTLTLLAVMLTSAVATGSA | Negative |
| P0AFH8 | AENNAQTTNESAGQKVDSSM   | Negative |
| P0AFH8 | LTSAVATGSAYAENNAQTTN   | Negative |
| P0AFH8 | MTMTRLKISKTLTLLAVMLTSA | Negative |
| P0AFH8 | AVATGSAYAENNAQTTNESA   | Negative |
| P0AFH8 | TSAVATGSAYAENNAQTTNE   | Negative |
| P0AFH8 | LKISKTLTLLAVMLTSAVATGS | Negative |
| P0AFH8 | RLKISKTLTLLAVMLTSAVATG | Negative |
| P0AFH8 | SAYAENNAQTTNESAGQKVD   | Negative |
| P0AFH8 | YAENNAQTTNESAGQKVDSS   | Negative |
| P0AFH8 | VMLTSAVATGSAYAENNAQT   | Negative |
| P0AFH8 | VATGSAYAENNAQTTNESAG   | Negative |
| P0AFH8 | KTLLAVMLTSAVATGSAYAE   | Negative |
| P0AFH8 | ATGSAYAENNAQTTNESAGQ   | Negative |
| P0AFH8 | TRLKISKTLTLLAVMLTSAVAT | Negative |
| P0AFH8 | MLTSAVATGSAYAENNAQTT   | Negative |
| P0AFI5 | PFAPQAVAKTAAATTASQPE   | Negative |
| P0AFI5 | VPFAPQAVAKTAAATTASQP   | Negative |
| P0AFI5 | VSLFSLALMLAVPFAPQAVA   | Negative |
| P0AFI5 | LAVPFAPQAVAKTAAATTAS   | Negative |
| P0AFI5 | AKTAAATTASQPEIASGSAM   | Negative |
| P0AFI5 | FRVSLFSLALMLAVPFAPQA   | Negative |
| P0AFI5 | TAAATTASQPEIASGSAMIV   | Negative |
| P0AFI5 | AVAKTAAATTASQPEIASGS   | Negative |
| P0AFI5 | QAVAKTAAATTASQPEIASG   | Negative |
| P0AFI5 | APQAVAKTAAATTASQPEIA   | Negative |

|        |                       |          |
|--------|-----------------------|----------|
| P0AFI5 | FAPQAVAKTAAATTASQPEI  | Negative |
| P0AFI5 | VAKTAAATTASQPEIASGSA  | Negative |
| P0AFI5 | MLAVPFAPQAVAKTAAATTA  | Negative |
| P0AFI5 | AVPFAPQAVAKTAAATTASQ  | Negative |
| P0AFI5 | SLFSLALMLAVPFAPQAVAK  | Negative |
| P0AFI5 | ALMLAVPFAPQAVAKTAAAT  | Negative |
| P0AFI5 | KTAAATTASQPEIASGSAMI  | Negative |
| P0AFI5 | ATTASQPEIASGSAMIVDLN  | Negative |
| P0AFI5 | SLALMLAVPFAPQAVAKTAA  | Negative |
| P0AFI5 | AAATTASQPEIASGSAMIVD  | Negative |
| P0AFI5 | LFSLALMLAVPFAPQAVAKT  | Negative |
| P0AFI5 | PKFRVSLFSLALMLAVPFAP  | Negative |
| P0AFI5 | MPKFRVSLFSLALMLAVPFA  | Negative |
| P0AFI5 | LMLAVPFAPQAVAKTAAATT  | Negative |
| P0AFI5 | FSLALMLAVPFAPQAVAKTA  | Negative |
| P0AFI5 | PQAVAKTAAATTASQPEIAS  | Negative |
| P0AFI5 | KFRVSLFSLALMLAVPFAPQ  | Negative |
| P0AFI5 | RVSLFSLALMLAVPFAPQAV  | Negative |
| P0AFI5 | AATTASQPEIASGSAMIVDL  | Negative |
| P0AFK9 | SRHLLAAGALALGMSAAHAD  | Negative |
| P0AFK9 | LALGMSAAHADDNNTLYFYN  | Negative |
| P0AFK9 | NNTLYFYNWTEYVPPGLLEQF | Negative |
| P0AFK9 | NNTLYFYNWTEYVPPGLLEQ  | Negative |
| P0AFK9 | LGMSAAHADDNNTLYFYNWT  | Negative |
| P0AFK9 | AAGALALGMSAAHADDNNTL  | Negative |
| P0AFK9 | KKWSRHLLAAGALALGMSAA  | Negative |
| P0AFK9 | TLYFYNWTEYVPPGLLEQFT  | Negative |
| P0AFK9 | GALALGMSAAHADDNNTLYF  | Negative |
| P0AFK9 | ADDNNTLYFYNWTEYVPPGL  | Negative |
| P0AFK9 | HLLAAGALALGMSAAHADDN  | Negative |
| P0AFK9 | DNNTLYFYNWTEYVPPGLLE  | Negative |
| P0AFK9 | GMSAAHADDNNTLYFYNWTE  | Negative |
| P0AFK9 | AGALALGMSAAHADDNNTLY  | Negative |
| P0AFK9 | WSRHLLAAGALALGMSAAHA  | Negative |
| P0AFK9 | RHLLAAGALALGMSAAHADDD | Negative |
| P0AFK9 | MSAAHADDNNTLYFYNWTEY  | Negative |
| P0AFK9 | ALALGMSAAHADDNNTLYFY  | Negative |
| P0AFK9 | KWSRHLLAAGALALGMSAAH  | Negative |
| P0AFK9 | ALGMSAAHADDNNTLYFYNW  | Negative |
| P0AFK9 | LYFYNWTEYVPPGLLEQFTK  | Negative |
| P0AFK9 | HADDNNTLYFYNWTEYVPPG  | Negative |
| P0AFK9 | AHADDNNTLYFYNWTEYVPP  | Negative |
| P0AFK9 | AAHADDNNTLYFYNWTEYVP  | Negative |
| P0AFK9 | SAAHADDNNTLYFYNWTEYV  | Negative |
| P0AFK9 | DDNNTLYFYNWTEYVPPGLL  | Negative |
| P0AFK9 | LLAAGALALGMSAAHADDDNN | Negative |



|        |                      |          |
|--------|----------------------|----------|
| P0AFK9 | YFYNWTEYVPPGLLEQFTKE | Negative |
| P0AFK9 | MKKWSRHLAAGALALGMSA  | Negative |
| P0AFL3 | MAAKGDPHVLLTTSAGNIEL | Negative |
| P0AFL3 | LAAMAAVFALSALSPAAMAA | Negative |
| P0AFL3 | LSALSPAAMAAKGDPHVLLT | Negative |
| P0AFL3 | LSPAAMAAKGDPHVLLTTS  | Negative |
| P0AFL3 | AMAAKGDPHVLLTTSAGNIE | Negative |
| P0AFL3 | PHVLLTTSAGNIELELDKQK | Negative |
| P0AFL3 | AVFALSALSPAAMAAKGDPH | Negative |
| P0AFL3 | MFKSTLAAMAAVFALSALSP | Negative |
| P0AFL3 | HVLLTTSAGNIELELDKQKA | Negative |
| P0AFL3 | GDPHVLLTTSAGNIELELDK | Negative |
| P0AFL3 | TLAAMAAVFALSALSPAAMA | Negative |
| P0AFL3 | PAAMAAKGDPHVLLTTSAGN | Negative |
| P0AFL3 | AAMAAKGDPHVLLTTSAGNI | Negative |
| P0AFL3 | FKSTLAAMAAVFALSALSPA | Negative |
| P0AFL3 | ALSALSPAAMAAKGDPHVLL | Negative |
| P0AFL3 | KSTLAAMAAVFALSALSPAA | Negative |
| P0AFL3 | DPHVLLTTSAGNIELELDKQ | Negative |
| P0AFL3 | MAAVFALSALSPAAMAAKGD | Negative |
| P0AFL3 | FALSALSPAAMAAKGDPHVL | Negative |
| P0AFL3 | ALSPAAMAAKGDPHVLLTTS | Negative |
| P0AFL3 | SALSPAAMAAKGDPHVLLTT | Negative |
| P0AFL3 | AMAAVFALSALSPAAMAAKG | Negative |
| P0AFL3 | VFALSALSPAAMAAKGDPHV | Negative |
| P0AFL3 | AAKGDPHVLLTTSAGNIELE | Negative |
| P0AFL3 | KGDPHVLLTTSAGNIELELD | Negative |
| P0AFL3 | AKGDPHVLLTTSAGNIELEL | Negative |
| P0AFL3 | AAMAAVFALSALSPAAMAAK | Negative |
| P0AFL3 | SPAAMAAKGDPHVLLTTSAG | Negative |
| P0AFL3 | STLAAMAAVFALSALSPAAM | Negative |
| P0AFM2 | DLPGKGITVNPVQSTITEET | Negative |
| P0AFM2 | SVLFATAFATLISTQTFAAD | Negative |
| P0AFM2 | LFATAFATLISTQTFAADLP | Negative |
| P0AFM2 | AFATLISTQTFAADLPGKGI | Negative |
| P0AFM2 | GKGITVNPVQSTITEETFQT | Negative |
| P0AFM2 | TVNPVQSTITEETFQTLLVS | Negative |
| P0AFM2 | MRHSVLFATAFATLISTQTF | Negative |
| P0AFM2 | ATAFATLISTQTFAADLPGK | Negative |
| P0AFM2 | FAADLPGKGITVNPVQSTIT | Negative |
| P0AFM2 | AADLPGKGITVNPVQSTITE | Negative |
| P0AFM2 | TLISTQTFAADLPGKGITVN | Negative |
| P0AFM2 | KGITVNPVQSTITEETFQTL | Negative |
| P0AFM2 | HSVLFATAFATLISTQTFAA | Negative |
| P0AFM2 | ITVNPVQSTITEETFQTLLV | Negative |
| P0AFM2 | LPGKGITVNPVQSTITEETF | Negative |

|        |                       |          |
|--------|-----------------------|----------|
| P0AFM2 | QTFAADLPGKGITVNPVQST  | Negative |
| P0AFM2 | FATLISTQTFAADLPGKGIT  | Negative |
| P0AFM2 | ATLISTQTFAADLPGKGITV  | Negative |
| P0AFM2 | RHSVLFATAFATLISTQTFA  | Negative |
| P0AFM2 | TAFATLISTQTFAADLPGKG  | Negative |
| P0AFM2 | ADLPGKGITVNPVQSTITEE  | Negative |
| P0AFM2 | STQTFAADLPGKGITVNPVQ  | Negative |
| P0AFM2 | VLFAATAFATLISTQTFAADL | Negative |
| P0AFM2 | GITVNPVQSTITEETFQTLL  | Negative |
| P0AFM2 | PGKGITVNPVQSTITEETFQ  | Negative |
| P0AFM2 | TQTFAADLPGKGITVNPVQS  | Negative |
| P0AFM2 | TFAADLPGKGITVNPVQSTI  | Negative |
| P0AFM2 | LISTQTFAADLPGKGITVNP  | Negative |
| P0AFM2 | ISTQTFAADLPGKGITVNPV  | Negative |
| P0AG78 | SVMAKDIQLLNVSYPDPTREL | Negative |
| P0AG78 | KWGVGLTFLLAATSVMAKDI  | Negative |
| P0AG78 | LAATSVMAKDIQLLNVSYPD  | Negative |
| P0AG78 | IQLLNVSYPDPTRELYEQYNK | Negative |
| P0AG78 | LTFLLAATSVMAKDIQLLN   | Negative |
| P0AG78 | VMAKDIQLLNVSYPDPTRELY | Negative |
| P0AG78 | MAKDIQLLNVSYPDPTRELYE | Negative |
| P0AG78 | ATSVMAKDIQLLNVSYPDPT  | Negative |
| P0AG78 | AATSVMAKDIQLLNVSYPDPT | Negative |
| P0AG78 | MNKWGVGLTFLLAATSVMAK  | Negative |
| P0AG78 | GLTFLLAATSVMAKDIQLLN  | Negative |
| P0AG78 | LNVSYPDPTRELYEQYNKAFS | Negative |
| P0AG78 | AKDIQLLNVSYPDPTRELYEQ | Negative |
| P0AG78 | TFLLAATSVMAKDIQLLNVS  | Negative |
| P0AG78 | DIQLLNVSYPDPTRELYEQYN | Negative |
| P0AG78 | LLAATSVMAKDIQLLNVSYPD | Negative |
| P0AG78 | QLLNVSYPDPTRELYEQYNKA | Negative |
| P0AG78 | KDIQLLNVSYPDPTRELYEQY | Negative |
| P0AG78 | VGLTFLLAATSVMAKDIQLL  | Negative |
| P0AG78 | SYDPTRELYEQYNKAFSAHW  | Negative |
| P0AG78 | NKWGVGLTFLLAATSVMAKD  | Negative |
| P0AG78 | TSVMAKDIQLLNVSYPDPTRE | Negative |
| P0AG78 | VSYPDPTRELYEQYNKAFSAH | Negative |
| P0AG78 | FLLAATSVMAKDIQLLNVS   | Negative |
| P0AG78 | WGVGLTFLLAATSVMAKDIQ  | Negative |
| P0AG78 | YDPTRELYEQYNKAFSAHWK  | Negative |
| P0AG78 | NVSYPDPTRELYEQYNKAFSA | Negative |
| P0AG78 | LLNVSYDPTRELYEQYNKAF  | Negative |
| P0AG78 | DPTRELYEQYNKAFSAHWKQ  | Negative |
| P0AG82 | VAATLSMSAFSVFAEASLTG  | Negative |
| P0AG82 | TLSMSAFSVFAEASLTGAGA  | Negative |
| P0AG82 | ASLTGAGATFPAPVYAKWAD  | Negative |

|        |                      |          |
|--------|----------------------|----------|
| P0AG82 | KVMRTTVATVVAATLSMSAF | Negative |
| P0AG82 | AEASLTGAGATFPAPVYAKW | Negative |
| P0AG82 | LSMSAFSVFAEASLTGAGAT | Negative |
| P0AG82 | VMRTTVATVVAATLSMSAFS | Negative |
| P0AG82 | VATVVAATLSMSAFSVFAEA | Negative |
| P0AG82 | TVVAATLSMSAFSVFAEASL | Negative |
| P0AG82 | SMSAFSVFAEASLTGAGATF | Negative |
| P0AG82 | FSVFAEASLTGAGATFPAPV | Negative |
| P0AG82 | SAFSVFAEASLTGAGATFPA | Negative |
| P0AG82 | MKVMRTTVATVVAATLSMSA | Negative |
| P0AG82 | MRTTVATVVAATLSMSAFSV | Negative |
| P0AG82 | ATVVAATLSMSAFSVFAEAS | Negative |
| P0AG82 | FAEASLTGAGATFPAPVYAK | Negative |
| P0AG82 | TVATVVAATLSMSAFSVFAE | Negative |
| P0AG82 | ATLSMSAFSVFAEASLTGAG | Negative |
| P0AG82 | RTTVATVVAATLSMSAFSVF | Negative |
| P0AG82 | SVFAEASLTGAGATFPAPVY | Negative |
| P0AG82 | LTGAGATFPAPVYAKWADTY | Negative |
| P0AG82 | TGAGATFPAPVYAKWADTYQ | Negative |
| P0AG82 | SLTGAGATFPAPVYAKWADT | Negative |
| P0AG82 | TTVATVVAATLSMSAFSVFA | Negative |
| P0AG82 | VFAEASLTGAGATFPAPVYA | Negative |
| P0AG82 | AFSVFAEASLTGAGATFPAP | Negative |
| P0AG82 | AATLSMSAFSVFAEASLTGA | Negative |
| P0AG82 | EASLTGAGATFPAPVYAKWA | Negative |
| P0AG82 | MSAFSVFAEASLTGAGATFP | Negative |
| P0AGC3 | AKQVTWRLLAAGVCLLTVSS | Negative |
| P0AGC3 | AGVCLLTVSSVARADSLDEQ | Negative |
| P0AGC3 | LLTVSSVARADSLDEQRSRY | Negative |
| P0AGC3 | VSSVARADSLDEQRSRYAQI | Negative |
| P0AGC3 | RADSLDEQRSRYAQIKQAWD | Negative |
| P0AGC3 | MEKAKQVTWRLLAAGVCLLT | Negative |
| P0AGC3 | TVSSVARADSLDEQRSRYAQ | Negative |
| P0AGC3 | QVTWRLLAAGVCLLTVSSVA | Negative |
| P0AGC3 | KQVTWRLLAAGVCLLTVSSV | Negative |
| P0AGC3 | ADSLDEQRSRYAQIKQAWDN | Negative |
| P0AGC3 | TWRLLAAGVCLLTVSSVARA | Negative |
| P0AGC3 | WRLLAAGVCLLTVSSVARAD | Negative |
| P0AGC3 | VCLLTVSSVARADSLDEQRS | Negative |
| P0AGC3 | GVCLLTVSSVARADSLDEQR | Negative |
| P0AGC3 | DSLDEQRSRYAQIKQAWDNR | Negative |
| P0AGC3 | LTVSSVARADSLDEQRSRYA | Negative |
| P0AGC3 | ARADSLDEQRSRYAQIKQAW | Negative |
| P0AGC3 | LDEQRSRYAQIKQAWDNRQM | Negative |
| P0AGC3 | SLDEQRSRYAQIKQAWDNRQ | Negative |
| P0AGC3 | LLAAGVCLLTVSSVARADSL | Negative |

|        |                       |          |
|--------|-----------------------|----------|
| P0AGC3 | VARADSLDEQRSRYAQIKQA  | Negative |
| P0AGC3 | VTWRLLAAGVCLLTVSSVAR  | Negative |
| P0AGC3 | CLLTVSSVARADSLDEQRSR  | Negative |
| P0AGC3 | KAKQVTWRLLAAGVCLLTVS  | Negative |
| P0AGC3 | EKAKQVTWRLLAAGVCLLTV  | Negative |
| P0AGC3 | LAAGVCLLTVSSVARADSLD  | Negative |
| P0AGC3 | SSVARADSLDEQRSRYAQIK  | Negative |
| P0AGC3 | SVARADSLDEQRSRYAQIKQ  | Negative |
| P0AGC3 | RLLAAGVCLLTVSSVARADS  | Negative |
| P0AGD1 | LVTSQGVGQSIGSVTITETD  | Negative |
| P0AGD1 | VVATGAQAASEKVEMNLVTS  | Negative |
| P0AGD1 | ATGAQAASEKVEMNLVTSQG  | Negative |
| P0AGD1 | GAQAASEKVEMNLVTSQGVG  | Negative |
| P0AGD1 | EKVEMNLVTSQGVGQSIGSV  | Negative |
| P0AGD1 | MNLVTSQGVGQSIGSVTITE  | Negative |
| P0AGD1 | AILALVVATGAQAASEKVEM  | Negative |
| P0AGD1 | VTSQGVGQSIGSVTITETDK  | Negative |
| P0AGD1 | AQAASEKVEMNLVTSQGVGQ  | Negative |
| P0AGD1 | AASEKVEMNLVTSQGVGQSI  | Negative |
| P0AGD1 | KRFSLAILALVVATGAQAAS  | Negative |
| P0AGD1 | NLVTSQGVGQSIGSVTITET  | Negative |
| P0AGD1 | KVEMNLVTSQGVGQSIGSVT  | Negative |
| P0AGD1 | ILALVVATGAQAASEKVEMN  | Negative |
| P0AGD1 | ASEKVEMNLVTSQGVGQSIG  | Negative |
| P0AGD1 | EMNLVTSQGVGQSIGSVTIT  | Negative |
| P0AGD1 | MKRFSLAILALVVATGAQAA  | Negative |
| P0AGD1 | TGAQAASEKVEMNLVTSQGV  | Negative |
| P0AGD1 | VATGAQAASEKVEMNLVTSQ  | Negative |
| P0AGD1 | VEMNLVTSQGVGQSIGSVTI  | Negative |
| P0AGD1 | SEKVEMNLVTSQGVGQSIGS  | Negative |
| P0AGD1 | ALVVATGAQAASEKVEMNLV  | Negative |
| P0AGD1 | RFSLAILALVVATGAQAASE  | Negative |
| P0AGD1 | QAASEKVEMNLVTSQGVGQS  | Negative |
| P0AGD1 | LAILALVVATGAQAASEKVE  | Negative |
| P0AGD1 | LVVATGAQAASEKVEMNLVT  | Negative |
| P0AGD1 | LALVVATGAQAASEKVEMNL  | Negative |
| P0AGD1 | TSQGVGQSIGSVTITETDKG  | Negative |
| P0AGD1 | FSLAILALVVATGAQAASEK  | Negative |
| P0C0J0 | ADQNFARNEKEAKDSAITFI  | Negative |
| P0C0J0 | GGFVLANPVFADQNFARNEK  | Negative |
| P0C0J0 | VLANPVFADQNFARNEKEAK  | Negative |
| P0C0J0 | KLGIIRLLSLLALGGFVLANP | Negative |
| P0C0J0 | FVLANPVFADQNFARNEKEA  | Negative |
| P0C0J0 | LALGGFVLANPVFADQNFAR  | Negative |
| P0C0J0 | SLLALGGFVLANPVFADQNF  | Negative |
| P0C0J0 | DQNFARNEKEAKDSAITFIQ  | Negative |

|        |                      |          |
|--------|----------------------|----------|
| P0C0J0 | NKKKLGIRLLSLLALGGFVL | Negative |
| P0C0J0 | LGIRLLSLLALGGFVLANPV | Negative |
| P0C0J0 | LANPVFADQNFARNEKEAKD | Negative |
| P0C0J0 | ALGGFVLANPVFADQNFARN | Negative |
| P0C0J0 | NFARNEKEAKDSAITFIQKS | Negative |
| P0C0J0 | KKKLGIRLLSLLALGGFVLA | Negative |
| P0C0J0 | KKLGIRLLSLLALGGFVLAN | Negative |
| P0C0J0 | LLSLLALGGFVLANPVFADQ | Negative |
| P0C0J0 | LSLLALGGFVLANPVFADQN | Negative |
| P0C0J0 | VFADQNFARNEKEAKDSAIT | Negative |
| P0C0J0 | ANPVFADQNFARNEKEAKDS | Negative |
| P0C0J0 | NPVFADQNFARNEKEAKDSA | Negative |
| P0C0J0 | RLLSLLALGGFVLANPVFAD | Negative |
| P0C0J0 | IRLLSLLALGGFVLANPVFA | Negative |
| P0C0J0 | LGGFVLANPVFADQNFARNE | Negative |
| P0C0J0 | PVFADQNFARNEKEAKDSAI | Negative |
| P0C0J0 | FADQNFARNEKEAKDSAITF | Negative |
| P0C0J0 | GIRLLSLLALGGFVLANPVF | Negative |
| P0C0J0 | GFVLANPVFADQNFARNEKE | Negative |
| P0C0J0 | MNKKKLGIRLLSLLALGGFV | Negative |
| P0C0J0 | QNFARNEKEAKDSAITFIQK | Negative |
| P0C0T5 | QKITQVPGSAQSIGSFSNG  | Negative |
| P0C0T5 | ATPWQKITQVPGSAQSIGS  | Negative |
| P0C0T5 | ASLAATPWQKITQVPGSAQ  | Negative |
| P0C0T5 | PWQKITQVPGSAQSIGSFS  | Negative |
| P0C0T5 | ASSASLAATPWQKITQVPG  | Negative |
| P0C0T5 | LLASSASLAATPWQKITQPV | Negative |
| P0C0T5 | KITQVPGSAQSIGSFSNGC  | Negative |
| P0C0T5 | AATPWQKITQVPGSAQSIG  | Negative |
| P0C0T5 | KTAIALLALLASSASLAATP | Negative |
| P0C0T5 | ITQVPGSAQSIGSFSNGCI  | Negative |
| P0C0T5 | QVPGSAQSIGSFSNGCIVG  | Negative |
| P0C0T5 | LASSASLAATPWQKITQVVP | Negative |
| P0C0T5 | TPWQKITQVPGSAQSIGSF  | Negative |
| P0C0T5 | WQKITQVPGSAQSIGSFSN  | Negative |
| P0C0T5 | SSASLAATPWQKITQVPGS  | Negative |
| P0C0T5 | MNKTAIALLALLASSASLAA | Negative |
| P0C0T5 | IALALLASSASLAATPWQK  | Negative |
| P0C0T5 | LLALLASSASLAATPWQKIT | Negative |
| P0C0T5 | LAATPWQKITQVPGSAQSI  | Negative |
| P0C0T5 | TAIALLALLASSASLAATPW | Negative |
| P0C0T5 | NKTAIALLALLASSASLAAT | Negative |
| P0C0T5 | TQVPGSAQSIGSFSNGCIV  | Negative |
| P0C0T5 | SASLAATPWQKITQVPGSA  | Negative |
| P0C0T5 | VPGSAQSIGSFSNGCIVGAD | Negative |
| P0C0T5 | SLAATPWQKITQVPGSAQS  | Negative |

|        |                      |          |
|--------|----------------------|----------|
| P0C0T5 | LALLASSASLAATPWQKITQ | Negative |
| P0C0T5 | PVPGSAQSIGSFSGCIVGA  | Negative |
| P0C0T5 | ALLASSASLAATPWQKITQP | Negative |
| P0C0T5 | ALLALLASSASLAATPWQKI | Negative |
| P0C0V0 | KKTTLALSALALSLGLALSP | Negative |
| P0C0V0 | TTLALSALALSLGLALSPLS | Negative |
| P0C0V0 | TAAETSSATTAQQMPSLAPM | Negative |
| P0C0V0 | LGLALSPLSATAAETSSATT | Negative |
| P0C0V0 | ETSSATTAQQMPSLAPMLEK | Negative |
| P0C0V0 | ALALSLGLALSPLSATAAET | Negative |
| P0C0V0 | LALSPLSATAAETSSATTAQ | Negative |
| P0C0V0 | AETSSATTAQQMPSLAPMLE | Negative |
| P0C0V0 | MKKTTLALSALALSLGLALS | Negative |
| P0C0V0 | ALSALALSLGLALSPLSATA | Negative |
| P0C0V0 | ATAAETSSATTAQQMPSLAP | Negative |
| P0C0V0 | LSLGLALSPLSATAAETSSA | Negative |
| P0C0V0 | LALSALALSLGLALSPLSAT | Negative |
| P0C0V0 | SATAAETSSATTAQQMPSLA | Negative |
| P0C0V0 | AAETSSATTAQQMPSLAPML | Negative |
| P0C0V0 | LALSLGLALSPLSATAAETS | Negative |
| P0C0V0 | LSATAAETSSATTAQQMPSL | Negative |
| P0C0V0 | LSALALSLGLALSPLSATAA | Negative |
| P0C0V0 | SALALSLGLALSPLSATAAE | Negative |
| P0C0V0 | KTTLALSALALSLGLALSPL | Negative |
| P0C0V0 | ALSPLSATAAETSSATTAQQ | Negative |
| P0C0V0 | LSPLSATAAETSSATTAQQM | Negative |
| P0C0V0 | TSSATTAQQMPSLAPMLEKV | Negative |
| P0C0V0 | SPLSATAAETSSATTAQQMP | Negative |
| P0C0V0 | SLGLALSPLSATAAETSSAT | Negative |
| P0C0V0 | SSATTAQQMPSLAPMLEKVM | Negative |
| P0C0V0 | GLALSPLSATAAETSSATTA | Negative |
| P0C0V0 | TLALSALALSLGLALSPLSA | Negative |
| P0C0V0 | PLSATAAETSSATTAQQMPS | Negative |
| P0C175 | CGFLLIFLVLSAMIATFSEV | Negative |
| P0C175 | SAMIATFSEVEATVKCGGCN | Negative |
| P0C175 | IATFSEVEATVKCGGCNRKC | Negative |
| P0C175 | TFSEVEATVKCGGCNRKCCA | Negative |
| P0C175 | MKFSCGFLIFLVLSAMIAT  | Negative |
| P0C175 | VLSAMIATFSEVEATVKCGG | Negative |
| P0C175 | FSCGFLIFLVLSAMIATFS  | Negative |
| P0C175 | CGGCNRKCCAGGCRSGKCIN | Negative |
| P0C175 | LSAMIATFSEVEATVKCGGC | Negative |
| P0C175 | VKCGGCNRKCCAGGCRSGKC | Negative |
| P0C175 | FLLIFLVLSAMIATFSEVEA | Negative |
| P0C175 | VEATVKCGGCNRKCCAGGCR | Negative |
| P0C175 | SEVEATVKCGGCNRKCCAGG | Negative |

|        |                      |          |
|--------|----------------------|----------|
| P0C175 | FLVLSAMIATFSEVEATVKC | Negative |
| P0C175 | LLIFLVLSAMIATFSEVEAT | Negative |
| P0C175 | SCGFLLIFLVLSAMIATFSE | Negative |
| P0C175 | IFLVLSAMIATFSEVEATVK | Negative |
| P0C175 | EVEATVKCGGCNRKCCAGGC | Negative |
| P0C175 | LIFLVLSAMIATFSEVEATV | Negative |
| P0C175 | ATVKCGGCNRKCCAGGCRSG | Negative |
| P0C175 | KCGGCNRKCCAGGCRSGKCI | Negative |
| P0C175 | MIATFSEVEATVKCGGCNRK | Negative |
| P0C175 | KFSCGFLLIFLVLSAMIATF | Negative |
| P0C175 | ATFSEVEATVKCGGCNRKCC | Negative |
| P0C175 | AMIATFSEVEATVKCGGCNR | Negative |
| P0C175 | GFLLIFLVLSAMIATFSEVE | Negative |
| P0C175 | TVKCGGCNRKCCAGGCRSGK | Negative |
| P0C175 | FSEVEATVKCGGCNRKCCAG | Negative |
| P0C175 | EATVKCGGCNRKCCAGGCRS | Negative |
| P0C194 | RGTSDCYEPCEKKYNCARAK | Negative |
| P0C194 | LVHTNIPCRGTSDCYEPCEK | Negative |
| P0C194 | NIPCRGTSDCYEPCEKKYNC | Negative |
| P0C194 | TIMMLANDASLVHTNIPCRG | Negative |
| P0C194 | VHTNIPCRGTSDCYEPCEKK | Negative |
| P0C194 | SLVHTNIPCRGTSDCYEPCE | Negative |
| P0C194 | LANDASLVHTNIPCRGTSDC | Negative |
| P0C194 | LFTIMMLANDASLVHTNIPC | Negative |
| P0C194 | VAYLLVLFTIMMLANDASLV | Negative |
| P0C194 | LLVLFTIMMLANDASLVHTN | Negative |
| P0C194 | CRGTSDCYEPCEKKYNCARA | Negative |
| P0C194 | MLANDASLVHTNIPCRGTSD | Negative |
| P0C194 | DASLVHTNIPCRGTSDCYEP | Negative |
| P0C194 | VLFTIMMLANDASLVHTNIP | Negative |
| P0C194 | ANDASLVHTNIPCRGTSDCY | Negative |
| P0C194 | KVAYLLVLFTIMMLANDASL | Negative |
| P0C194 | MMLANDASLVHTNIPCRGTS | Negative |
| P0C194 | MKVAYLLVLFTIMMLANDAS | Negative |
| P0C194 | IMMLANDASLVHTNIPCRGT | Negative |
| P0C194 | PCRGTSDCYEPCEKKYNCAR | Negative |
| P0C194 | YLLVLFTIMMLANDASLVHT | Negative |
| P0C194 | AYLLVLFTIMMLANDASLVH | Negative |
| P0C194 | HTNIPCRGTSDCYEPCEKKY | Negative |
| P0C194 | GTSDCYEPCEKKYNCARAKC | Negative |
| P0C194 | NDASLVHTNIPCRGTSDCYE | Negative |
| P0C194 | FTIMMLANDASLVHTNIPCR | Negative |
| P0C194 | ASLVHTNIPCRGTSDCYEPC | Negative |
| P0C194 | IPCRGTSDCYEPCEKKYNCA | Negative |
| P0C194 | TNIPCRGTSDCYEPCEKKYN | Negative |
| P0C1B3 | QSIYFLLTDRFARTDGSTTA | Negative |

|        |                       |          |
|--------|-----------------------|----------|
| P0C1B3 | TPADWRSQSIYFLLTDRFAR  | Negative |
| P0C1B3 | QVAAPALAAATPADWRSQSIY | Negative |
| P0C1B3 | MVAWWSLFLYGLQVAAPALA  | Negative |
| P0C1B3 | DWRSQSIYFLLTDRFARTDG  | Negative |
| P0C1B3 | APALAAATPADWRSQSIYFLL | Negative |
| P0C1B3 | AATPADWRSQSIYFLLTDRF  | Negative |
| P0C1B3 | WRSQSIYFLLTDRFARTDGS  | Negative |
| P0C1B3 | PALAAATPADWRSQSIYFLLT | Negative |
| P0C1B3 | GLQVAAPALAAATPADWRSQS | Negative |
| P0C1B3 | RSQSIYFLLTDRFARTDGST  | Negative |
| P0C1B3 | PADWRSQSIYFLLTDRFART  | Negative |
| P0C1B3 | VAWWSLFLYGLQVAAPALAA  | Negative |
| P0C1B3 | LQVAAPALAAATPADWRSQSI | Negative |
| P0C1B3 | ATPADWRSQSIYFLLTDRFA  | Negative |
| P0C1B3 | WSLFLYGLQVAAPALAAATPA | Negative |
| P0C1B3 | WWSLFLYGLQVAAPALAAATP | Negative |
| P0C1B3 | AAPALAAATPADWRSQSIYFL | Negative |
| P0C1B3 | LYGLQVAAPALAAATPADWRS | Negative |
| P0C1B3 | VAAPALAAATPADWRSQSIYF | Negative |
| P0C1B3 | FLYGLQVAAPALAAATPADWR | Negative |
| P0C1B3 | MMVAWWSLFLYGLQVAAPAL  | Negative |
| P0C1B3 | AWWSLFLYGLQVAAPALAAAT | Negative |
| P0C1B3 | ADWRSQSIYFLLTDRFARTD  | Negative |
| P0C1B3 | LAATPADWRSQSIYFLLTDR  | Negative |
| P0C1B3 | ALAAATPADWRSQSIYFLLTD | Negative |
| P0C1B3 | LFLYGLQVAAPALAAATPADW | Negative |
| P0C1B3 | SQSIYFLLTDRFARTDGGSTT | Negative |
| P0C1B3 | YGLQVAAPALAAATPADWRSQ | Negative |
| P0C1C0 | LLAAQPTMAANTGGYATTDG  | Negative |
| P0C1C0 | AQPTMAANTGGYATTDGGDV  | Negative |
| P0C1C0 | QPTMAANTGGYATTDGGDVS  | Negative |
| P0C1C0 | GGYATTDGGDVSGAVKKTAR  | Negative |
| P0C1C0 | GYATTDGGDVSGAVKKTARS  | Negative |
| P0C1C0 | ATTDGGDVSGAVKKTARSLQ  | Negative |
| P0C1C0 | LLLAAQPTMAANTGGYATTD  | Negative |
| P0C1C0 | AANTGGYATTDGGDVSGAVK  | Negative |
| P0C1C0 | YATTDGGDVSGAVKKTARSL  | Negative |
| P0C1C0 | MAANTGGYATTDGGDVSGAV  | Negative |
| P0C1C0 | LAAQPTMAANTGGYATTDGG  | Negative |
| P0C1C0 | GLLLAAQPTMAANTGGYAT   | Negative |
| P0C1C0 | ANTGGYATTDGGDVSGAVKK  | Negative |
| P0C1C0 | LPSAAAGLLLLAAQPTMAAN  | Negative |
| P0C1C0 | TTDGGDVSGAVKKTARSLQE  | Negative |
| P0C1C0 | PSAAAGLLLLAAQPTMAANT  | Negative |
| P0C1C0 | YLLPSAAAGLLLLAAQPTMA  | Negative |
| P0C1C0 | LLPSAAAGLLLLAAQPTMAA  | Negative |



|        |                       |          |
|--------|-----------------------|----------|
| P0C1C0 | TGGYATTDGGDVSGAVKKTA  | Negative |
| P0C1C0 | NTGGYATTDGGDVSGAVKKT  | Negative |
| P0C1C0 | AAQPTMAANTGGYATTDGGD  | Negative |
| P0C1C0 | KYLLPSAAAGLLLLAAQPTM  | Negative |
| P0C1C0 | AAGLLLLAAQPTMAANTGGY  | Negative |
| P0C1C0 | TMAANTGGYATTDGGDVSGA  | Negative |
| P0C1C0 | SAAAGLLLLAAQPTMAANTG  | Negative |
| P0C1C0 | MKYLLPSAAAGLLLLAAQPT  | Negative |
| P0C1C0 | PTMAANTGGYATTDGGDVSG  | Negative |
| P0C1C0 | LLLLAAQPTMAANTGGYATT  | Negative |
| P0C1C0 | AGLLLLAAQPTMAANTGGYA  | Negative |
| P0C1X2 | AVLIL TICMLAPGTGTLLPK | Negative |
| P0C1X2 | MEGRRFAAVLIL TICMLAPG | Negative |
| P0C1X2 | RRFAAVLIL TICMLAPGTGT | Negative |
| P0C1X2 | DRPSLCDLPADSGSGTKAEK  | Negative |
| P0C1X2 | RPSLCDLPADSGSGTKAEKR  | Negative |
| P0C1X2 | TICMLAPGTGTLLPKDRPSL  | Negative |
| P0C1X2 | PGTGTLLPKDRPSLCDLPAD  | Negative |
| P0C1X2 | AAVLIL TICMLAPGTGTLLP | Negative |
| P0C1X2 | KDRPSLCDLPADSGSGTKAE  | Negative |
| P0C1X2 | ILTICMLAPGTGTLLPKDRP  | Negative |
| P0C1X2 | GTLLPKDRPSLCDLPADSGS  | Negative |
| P0C1X2 | FAAVLIL TICMLAPGTGTLL | Negative |
| P0C1X2 | LLPKDRPSLCDLPADSGSGT  | Negative |
| P0C1X2 | APGTGTLLPKDRPSLCDLPA  | Negative |
| P0C1X2 | MLAPGTGTLLPKDRPSLCDL  | Negative |
| P0C1X2 | LILTICMLAPGTGTLLPKDR  | Negative |
| P0C1X2 | PKDRPSLCDLPADSGSGTKA  | Negative |
| P0C1X2 | GTGTLLPKDRPSLCDLPADS  | Negative |
| P0C1X2 | LPKDRPSLCDLPADSGSGTK  | Negative |
| P0C1X2 | EGRRFAAVLIL TICMLAPGT | Negative |
| P0C1X2 | LAPGTGTLLPKDRPSLCDLP  | Negative |
| P0C1X2 | ICMLAPGTGTLLPKDRPSLC  | Negative |
| P0C1X2 | VLIL TICMLAPGTGTLLPKD | Negative |
| P0C1X2 | PSLCDLPADSGSGTKAEKRI  | Negative |
| P0C1X2 | TLLPKDRPSLCDLPADSGSG  | Negative |
| P0C1X2 | TGTLLPKDRPSLCDLPADSG  | Negative |
| P0C1X2 | GRRFAAVLIL TICMLAPGTG | Negative |
| P0C1X2 | CMLAPGTGTLLPKDRPSLCD  | Negative |
| P0C1X2 | RFAAVLIL TICMLAPGTGTL | Negative |
| P0C1X6 | TTVEAGEGPKSDCKPDLCEA  | Negative |
| P0C1X6 | MVLIGSIFETTVEAGEGPKS  | Negative |
| P0C1X6 | FETTVEAGEGPKSDCKPDL   | Negative |
| P0C1X6 | SIFETTVEAGEGPKSDCKPD  | Negative |
| P0C1X6 | TVEAGEGPKSDCKPDLCEAA  | Negative |
| P0C1X6 | EAGEGPKSDCKPDLCEAACK  | Negative |

|        |                      |          |
|--------|----------------------|----------|
| P0C1X6 | AFILISMVLIGSIFETTVEA | Negative |
| P0C1X6 | VEAGEGPKSDCKPDLCEAAC | Negative |
| P0C1X6 | AGEGPKSDCKPDLCEAACKD | Negative |
| P0C1X6 | ETTVEAGEGPKSDCKPDLCE | Negative |
| P0C1X6 | GEGPKSDCKPDLCEAACKDL | Negative |
| P0C1X6 | IFETTVEAGEGPKSDCKPDL | Negative |
| P0C1X6 | GPKSDCKPDLCEAACKDLGK | Negative |
| P0C1X6 | HFSGVAFILISMVLIGSIFE | Negative |
| P0C1X6 | SGVAFILISMVLIGSIFETT | Negative |
| P0C1X6 | FSGVAFILISMVLIGSIFET | Negative |
| P0C1X6 | ILISMVLIGSIFETTVEAGE | Negative |
| P0C1X6 | MHFSGVAFILISMVLIGSIF | Negative |
| P0C1X6 | VAFILISMVLIGSIFETTVE | Negative |
| P0C1X6 | LISMVLIGSIFETTVEAGEG | Negative |
| P0C1X6 | ISMVLIGSIFETTVEAGEGP | Negative |
| P0C1X6 | IGSIFETTVEAGEGPKSDCK | Negative |
| P0C1X6 | FILISMVLIGSIFETTVEAG | Negative |
| P0C1X6 | EGPKSDCKPDLCEAACKDLG | Negative |
| P0C1X6 | GVAFILISMVLIGSIFETTV | Negative |
| P0C1X6 | GSIFETTVEAGEGPKSDCKP | Negative |
| P0C1X6 | LIGSIFETTVEAGEGPKSDC | Negative |
| P0C1X6 | PKSDCKPDLCEAACKDLGKP | Negative |
| P0C1X6 | VLIGSIFETTVEAGEGPKSD | Negative |
| P0C1Y5 | IMWSLVQVQVLVAVALAFLV | Negative |
| P0C1Y5 | LVGGAWCGPPKVPPGKNITA | Negative |
| P0C1Y5 | WCGPPKVPPGKNITAKYGSD | Negative |
| P0C1Y5 | QVQVLVAVALAFLVGGAWCG | Negative |
| P0C1Y5 | VQVQVLVAVALAFLVGGAWC | Negative |
| P0C1Y5 | VLVAVALAFLVGGAWCGPPK | Negative |
| P0C1Y5 | GGAWCGPPKVPPGKNITAKY | Negative |
| P0C1Y5 | VGGAWCGPPKVPPGKNITAK | Negative |
| P0C1Y5 | LVQVQVLVAVALAFLVGGAW | Negative |
| P0C1Y5 | VVSIMWSLVQVQVLVAVALA | Negative |
| P0C1Y5 | AFLVGGAWCGPPKVPPGKNI | Negative |
| P0C1Y5 | VSIMWSLVQVQVLVAVALAF | Negative |
| P0C1Y5 | LAFLVGGAWCGPPKVPPGKN | Negative |
| P0C1Y5 | AVALAFLVGGAWCGPPKVPP | Negative |
| P0C1Y5 | WSLVQVQVLVAVALAFLVGG | Negative |
| P0C1Y5 | VALAFLVGGAWCGPPKVPPG | Negative |
| P0C1Y5 | ALAFLVGGAWCGPPKVPPGK | Negative |
| P0C1Y5 | QVLVAVALAFLVGGAWCGPP | Negative |
| P0C1Y5 | SIMWSLVQVQVLVAVALAFL | Negative |
| P0C1Y5 | TVVSIMWSLVQVQVLVAVAL | Negative |
| P0C1Y5 | MWSLVQVQVLVAVALAFLVG | Negative |
| P0C1Y5 | AWCGPPKVPPGKNITAKYGS | Negative |
| P0C1Y5 | VAVALAFLVGGAWCGPPKVP | Negative |

|        |                       |          |
|--------|-----------------------|----------|
| P0C1Y5 | MTVVVSIMWSLVQVQVLVAVA | Negative |
| P0C1Y5 | CGPPKVPPGKNITAKYGSDW  | Negative |
| P0C1Y5 | FLVGGAWCGPPKVPPGKNIT  | Negative |
| P0C1Y5 | GAWCGPPKVPPGKNITAKYG  | Negative |
| P0C1Y5 | VQVLVAVALAFLVGGAWCGP  | Negative |
| P0C1Y5 | SLVQVQVLVAVALAFLVGG   | Negative |
| P0C2E9 | IRFKKTKLIASIAMALCLFS  | Negative |
| P0C2E9 | IAMALCLFSQPVISFSKDIT  | Negative |
| P0C2E9 | ISFSKDITDKNQSIDSGISS  | Negative |
| P0C2E9 | RFKKTKLIASIAMALCLFSQ  | Negative |
| P0C2E9 | TKLIASIAMALCLFSQPVIS  | Negative |
| P0C2E9 | KKTKLIASIAMALCLFSQP   | Negative |
| P0C2E9 | SFSKDITDKNQSIDSGISL   | Negative |
| P0C2E9 | ASIAMALCLFSQPVISFSKD  | Negative |
| P0C2E9 | LCLFSQPVISFSKDITDKNQ  | Negative |
| P0C2E9 | LIASIAMALCLFSQPVISFS  | Negative |
| P0C2E9 | SKDITDKNQSIDSGISSLSY  | Negative |
| P0C2E9 | KTKLIASIAMALCLFSQPVI  | Negative |
| P0C2E9 | KDITDKNQSIDSGISSLSYN  | Negative |
| P0C2E9 | PVISFSKDITDKNQSIDSGI  | Negative |
| P0C2E9 | VISFSKDITDKNQSIDSGIS  | Negative |
| P0C2E9 | MIRFKKTKLIASIAMALCLF  | Negative |
| P0C2E9 | IASIAMALCLFSQPVISFSK  | Negative |
| P0C2E9 | SIAMALCLFSQPVISFSKDI  | Negative |
| P0C2E9 | CLFSQPVISFSKDITDKNQ   | Negative |
| P0C2E9 | KLIASIAMALCLFSQPVISF  | Negative |
| P0C2E9 | MALCLFSQPVISFSKDITDK  | Negative |
| P0C2E9 | LFSQPVISFSKDITDKNQSI  | Negative |
| P0C2E9 | ALCLFSQPVISFSKDITDKN  | Negative |
| P0C2E9 | DITDKNQSIDSGISSLSYNR  | Negative |
| P0C2E9 | SQPVISFSKDITDKNQSID   | Negative |
| P0C2E9 | FSKDITDKNQSIDSGISSLS  | Negative |
| P0C2E9 | FKKTKLIASIAMALCLFSQP  | Negative |
| P0C2E9 | QPVISFSKDITDKNQSIDSG  | Negative |
| P0C2E9 | FSQPVISFSKDITDKNQSID  | Negative |
| P0C2S1 | VLSIMLPSTVFALEDKSSKL  | Negative |
| P0C2S1 | ALEDKSSKLPDYKNDLLYER  | Negative |
| P0C2S1 | LEDKSSKLPDYKNDLLYERT  | Negative |
| P0C2S1 | IVLSIMLPSTVFALEDKSSK  | Negative |
| P0C2S1 | LCAAIVLTIVLSIMLPSTVF  | Negative |
| P0C2S1 | NFRRMLCAAIVLTIVLSIML  | Negative |
| P0C2S1 | AAIVLTIVLSIMLPSTVFAL  | Negative |
| P0C2S1 | FALEDKSSKLPDYKNDLLYE  | Negative |
| P0C2S1 | RMLCAAIVLTIVLSIMLPST  | Negative |
| P0C2S1 | IMLPSTVFALEDKSSKLPDY  | Negative |
| P0C2S1 | PSTVFALEDKSSKLPDYKND  | Negative |

|        |                       |          |
|--------|-----------------------|----------|
| P0C2S1 | TIVLSIMLPSTVFALEDKSS  | Negative |
| P0C2S1 | LSIMLPSTVFALEDKSSKLP  | Negative |
| P0C2S1 | AIVLTIVLSIMLPSTVFALE  | Negative |
| P0C2S1 | VFALEDKSSKLPDYKNDLLY  | Negative |
| P0C2S1 | CAAIVLTIVLSIMLPSTVFA  | Negative |
| P0C2S1 | MNFRMLCAAIVLTIVLSIM   | Negative |
| P0C2S1 | LPSTVFALEDKSSKLPDYKN  | Negative |
| P0C2S1 | MLPSTVFALEDKSSKLPDYK  | Negative |
| P0C2S1 | STVFALEDKSSKLPDYKNDL  | Negative |
| P0C2S1 | VL TIVLSIMLPSTVFALEDK | Negative |
| P0C2S1 | RRMLCAAIVLTIVLSIMLPS  | Negative |
| P0C2S1 | SIMLPSTVFALEDKSSKLPD  | Negative |
| P0C2S1 | MLCAAIVLTIVLSIMLPSTV  | Negative |
| P0C2S1 | FRRMLCAAIVLTIVLSIMLP  | Negative |
| P0C2S1 | IVLTIVLSIMLPSTVFALED  | Negative |
| P0C2S1 | TVFALEDKSSKLPDYKNDLL  | Negative |
| P0C2S1 | DKSSKLPDYKNDLLYERTFD  | Negative |
| P0C2S1 | EDKSSKLPDYKNDLLYERTF  | Negative |
| P0C2T2 | SRKIRAWGRRLMIGTAAAVV  | Negative |
| P0C2T2 | KIRAWGRRLMIGTAAAVVLP  | Negative |
| P0C2T2 | VVLPGLVGLAGGAATAGAFS  | Negative |
| P0C2T2 | LMIGTAAAVVLPGLVGLAGG  | Negative |
| P0C2T2 | RLMIGTAAAVVLPGLVGLAG  | Negative |
| P0C2T2 | GLVGLAGGAATAGAFSRPGL  | Negative |
| P0C2T2 | RAWGRRLMIGTAAAVVLPGL  | Negative |
| P0C2T2 | AWGRRLMIGTAAAVVLPGLV  | Negative |
| P0C2T2 | WGRRLMIGTAAAVVLPGLVG  | Negative |
| P0C2T2 | GLAGGAATAGAFSRPGLPVE  | Negative |
| P0C2T2 | VSRKIRAWGRRLMIGTAAAV  | Negative |
| P0C2T2 | RKIRAWGRRLMIGTAAAVVL  | Negative |
| P0C2T2 | RRLMIGTAAAVVLPGLVGLA  | Negative |
| P0C2T2 | VLPGLVGLAGGAATAGAFSR  | Negative |
| P0C2T2 | TDVSRKIRAWGRRLMIGTAA  | Negative |
| P0C2T2 | IRAWGRRLMIGTAAAVVLPG  | Negative |
| P0C2T2 | IGTAAAVVLPGLVGLAGGAA  | Negative |
| P0C2T2 | TAAAVVLPGLVGLAGGAATA  | Negative |
| P0C2T2 | LVGLAGGAATAGAFSRPGLP  | Negative |
| P0C2T2 | AVVLPGLVGLAGGAATAGAF  | Negative |
| P0C2T2 | LPGLVGLAGGAATAGAFSRP  | Negative |
| P0C2T2 | MIGTAAAVVLPGLVGLAGGA  | Negative |
| P0C2T2 | AAAVVLPGLVGLAGGAATAG  | Negative |
| P0C2T2 | GTAAAVVLPGLVGLAGGAAT  | Negative |
| P0C2T2 | VGLAGGAATAGAFSRPGLPV  | Negative |
| P0C2T2 | AAVVLPGLVGLAGGAATAGA  | Negative |
| P0C2T2 | MTDVSRKIRAWGRRLMIGTA  | Negative |
| P0C2T2 | DVSRKIRAWGRRLMIGTAAA  | Negative |

|        |                       |          |
|--------|-----------------------|----------|
| P0C2T2 | GRRLMIGTAAAVVLPGLVGL  | Negative |
| P0C552 | LLTLVVVTIVCLDLGYTLKC  | Negative |
| P0C552 | LGYTLKCHTTQFRNIETCQK  | Negative |
| P0C552 | VVVTIVCLDLGYTLKCHTTQ  | Negative |
| P0C552 | YTLKCHTTQFRNIETCQKWE  | Negative |
| P0C552 | TTQFRNIETCQKWETVCFQR  | Negative |
| P0C552 | IVCLDLGYTLKCHTTQFRNI  | Negative |
| P0C552 | MKTLLLTIVVVVTIVCLDLGY | Negative |
| P0C552 | TLKCHTTQFRNIETCQKWET  | Negative |
| P0C552 | VCLDLGYTLKCHTTQFRNIE  | Negative |
| P0C552 | LLLTLVVVTIVCLDLGYTLK  | Negative |
| P0C552 | LTLVVVTIVCLDLGYTLKCH  | Negative |
| P0C552 | FRNIETCQKWETVCFQRAVK  | Negative |
| P0C552 | GYTLKCHTTQFRNIETCQKW  | Negative |
| P0C552 | HTTQFRNIETCQKWETVCFQ  | Negative |
| P0C552 | LVVVVTIVCLDLGYTLKCHTT | Negative |
| P0C552 | TQFRNIETCQKWETVCFQRA  | Negative |
| P0C552 | TLLLTLVVVTIVCLDLGYTL  | Negative |
| P0C552 | VTIVCLDLGYTLKCHTTQFR  | Negative |
| P0C552 | KTLLLTLVVVTIVCLDLGYT  | Negative |
| P0C552 | CLDLGYTLKCHTTQFRNIET  | Negative |
| P0C552 | LKCHTTQFRNIETCQKWETV  | Negative |
| P0C552 | DLGYTLKCHTTQFRNIETCQ  | Negative |
| P0C552 | KCHTTQFRNIETCQKWETVC  | Negative |
| P0C552 | QFRNIETCQKWETVCFQRAV  | Negative |
| P0C552 | LDLGYTLKCHTTQFRNIETC  | Negative |
| P0C552 | CHTTQFRNIETCQKWETVCF  | Negative |
| P0C552 | TIVCLDLGYTLKCHTTQFRN  | Negative |
| P0C552 | VVTIVCLDLGYTLKCHTTQF  | Negative |
| P0C552 | RNIETCQKWETVCFQRAVKP  | Negative |
| P0C553 | KTLLLTLVVVTIVCLDLGYT  | Negative |
| P0C553 | TLLLTLVVVTIVCLDLGYTL  | Negative |
| P0C553 | VCLDLGYTLICYSSSMNKDS  | Negative |
| P0C553 | LICYSSSMNKDSKTCQKWET  | Negative |
| P0C553 | SSMNKDSKTCQKWETVCFQE  | Negative |
| P0C553 | LLLTLVVVTIVCLDLGYTLI  | Negative |
| P0C553 | NKDSKTCQKWETVCFQEAFK  | Negative |
| P0C553 | MKTLLLTLVVVTIVCLDLGY  | Negative |
| P0C553 | ICYSSSMNKDSKTCQKWETV  | Negative |
| P0C553 | IVCLDLGYTLICYSSSMNKD  | Negative |
| P0C553 | SMNKDSKTCQKWETVCFQEA  | Negative |
| P0C553 | VVVTIVCLDLGYTLICYSSS  | Negative |
| P0C553 | SSSMNKDSKTCQKWETVCFQ  | Negative |
| P0C553 | TIVCLDLGYTLICYSSSMNK  | Negative |
| P0C553 | LLTLVVVTIVCLDLGYTLIC  | Negative |
| P0C553 | DLGYTLICYSSSMNKDSKTC  | Negative |

|        |                       |          |
|--------|-----------------------|----------|
| P0C553 | MNKDSKTCQKWETVCFQEAF  | Negative |
| P0C553 | LDLGYTLICYSSSMNKDSKT  | Negative |
| P0C553 | LTLVVVTIVCLDLGYTLICY  | Negative |
| P0C553 | GYTLICYSSSMNKDSKTCQK  | Negative |
| P0C553 | VTIVCLDLGYTLICYSSSMN  | Negative |
| P0C553 | CLDLGYTLICYSSSMNKDSK  | Negative |
| P0C553 | YSSSMNKDSKTCQKWETVCF  | Negative |
| P0C553 | LVVVVTIVCLDLGYTLICYSS | Negative |
| P0C553 | TLICYSSSMNKDSKTCQKWE  | Negative |
| P0C553 | LGYTLICYSSSMNKDSKTCQ  | Negative |
| P0C553 | YTLICYSSSMNKDSKTCQKW  | Negative |
| P0C553 | CYSSSMNKDSKTCQKWETVC  | Negative |
| P0C553 | VVTIVCLDLGYTLICYSSSM  | Negative |
| P0C554 | LTKYSQDNESSKTCPSGQKL  | Negative |
| P0C554 | IVCLELGYTRKCLTKYSQDN  | Negative |
| P0C554 | TLLLTLVVVTIVCLELGYTR  | Negative |
| P0C554 | LGYTRKCLTKYSQDNESSKT  | Negative |
| P0C554 | LTLVVVTIVCLELGYTRKCL  | Negative |
| P0C554 | SQDNESSKTCPSGQKLCFKK  | Negative |
| P0C554 | LELGYTRKCLTKYSQDNESS  | Negative |
| P0C554 | TIVCLELGYTRKCLTKYSQD  | Negative |
| P0C554 | YSQDNESSKTCPSGQKLCFK  | Negative |
| P0C554 | VVVVTIVCLELGYTRKCLTKY | Negative |
| P0C554 | LLTLVVVTIVCLELGYTRKC  | Negative |
| P0C554 | YTRKCLTKYSQDNESSKTCP  | Negative |
| P0C554 | TRKCLTKYSQDNESSKTCPS  | Negative |
| P0C554 | CLTKYSQDNESSKTCPSGQK  | Negative |
| P0C554 | KTLLLTLVVVTIVCLELGYT  | Negative |
| P0C554 | ELGYTRKCLTKYSQDNESSK  | Negative |
| P0C554 | KYSQDNESSKTCPSGQKLCF  | Negative |
| P0C554 | TKYSQDNESSKTCPSGQKLC  | Negative |
| P0C554 | LLLTLVVVTIVCLELGYTRK  | Negative |
| P0C554 | VCLELGYTRKCLTKYSQDNE  | Negative |
| P0C554 | QDNESSKTCPSGQKLCFKKW  | Negative |
| P0C554 | KCLTKYSQDNESSKTCPSGQ  | Negative |
| P0C554 | VTIVCLELGYTRKCLTKYSQ  | Negative |
| P0C554 | VVTIVCLELGYTRKCLTKYS  | Negative |
| P0C554 | LVVVVTIVCLELGYTRKCLTK | Negative |
| P0C554 | MKTLLLLTLVVVTIVCLELGY | Negative |
| P0C554 | GYTRKCLTKYSQDNESSKTC  | Negative |
| P0C554 | CLELGYTRKCLTKYSQDNES  | Negative |
| P0C554 | RKCLTKYSQDNESSKTCPSG  | Negative |
| P0C8E7 | DDEDYGD LGGCPFLVAENKT | Negative |
| P0C8E7 | DYGD LGGCPFLVAENKTGYP | Negative |
| P0C8E7 | EDDEDYGD LGGCPFLVAENK | Negative |
| P0C8E7 | CAMQVICEDDEDYGD LGGCP | Negative |

|        |                      |          |
|--------|----------------------|----------|
| P0C8E7 | CEDDEDYGDLGGCPFLVAEN | Negative |
| P0C8E7 | VICEDDEDYGDLGGCPFLVA | Negative |
| P0C8E7 | ITALCAMQVICEDDEDYGDL | Negative |
| P0C8E7 | IITALCAMQVICEDDEDYGD | Negative |
| P0C8E7 | GDLGGCPFLVAENKTGYPTI | Negative |
| P0C8E7 | MTFKACIAIITALCAMQVIC | Negative |
| P0C8E7 | DLGGCPFLVAENKTGYPTIV | Negative |
| P0C8E7 | IAIITALCAMQVICEDDEDY | Negative |
| P0C8E7 | ACIAIITALCAMQVICEDDE | Negative |
| P0C8E7 | FKACIAIITALCAMQVICED | Negative |
| P0C8E7 | GGCPFLVAENKTGYPTIVAC | Negative |
| P0C8E7 | LGGCPFLVAENKTGYPTIVA | Negative |
| P0C8E7 | TFKACIAIITALCAMQVICE | Negative |
| P0C8E7 | LCAMQVICEDDEDYGDLGGC | Negative |
| P0C8E7 | AMQVICEDDEDYGDLGGCPF | Negative |
| P0C8E7 | EDYGDLGGCPFLVAENKTGY | Negative |
| P0C8E7 | AIITALCAMQVICEDDEDYG | Negative |
| P0C8E7 | ALCAMQVICEDDEDYGDLGG | Negative |
| P0C8E7 | KACIAIITALCAMQVICEDD | Negative |
| P0C8E7 | TALCAMQVICEDDEDYGDLG | Negative |
| P0C8E7 | QVICEDDEDYGDLGGCPFLV | Negative |
| P0C8E7 | MQVICEDDEDYGDLGGCPFL | Negative |
| P0C8E7 | ICEDDEDYGDLGGCPFLVAE | Negative |
| P0C8E7 | DEDYGDLGGCPFLVAENKTG | Negative |
| P0C8E7 | YGDLGGCPFLVAENKTGYPT | Negative |
| P0C8E8 | LCVLVVSDSKGLVSTIESRT | Negative |
| P0C8E8 | RTSGDGADNFDVVSCNKNCT | Negative |
| P0C8E8 | VSTIESRTSGDGADNFDVVS | Negative |
| P0C8E8 | ESRTSGDGADNFDVVSCNKN | Negative |
| P0C8E8 | ALLARLLLCVLVVSDSKGLV | Negative |
| P0C8E8 | LARLLLCVLVVSDSKGLVST | Negative |
| P0C8E8 | KGLVSTIESRTSGDGADNFD | Negative |
| P0C8E8 | LVVSDSKGLVSTIESRTSGD | Negative |
| P0C8E8 | VLVVSDSKGLVSTIESRTSG | Negative |
| P0C8E8 | SKGLVSTIESRTSGDGADNF | Negative |
| P0C8E8 | LLARLLLCVLVVSDSKGLVS | Negative |
| P0C8E8 | LLLCVLVVSDSKGLVSTIES | Negative |
| P0C8E8 | SDSKGLVSTIESRTSGDGAD | Negative |
| P0C8E8 | STIESRTSGDGADNFDVVSC | Negative |
| P0C8E8 | CVLVVSDSKGLVSTIESRTS | Negative |
| P0C8E8 | VVSDSKGLVSTIESRTSGDG | Negative |
| P0C8E8 | VSDSKGLVSTIESRTSGDGA | Negative |
| P0C8E8 | IESRTSGDGADNFDVVSCNK | Negative |
| P0C8E8 | GLVSTIESRTSGDGADNFDV | Negative |
| P0C8E8 | LLCVLVVSDSKGLVSTIESR | Negative |
| P0C8E8 | DSKGLVSTIESRTSGDGADN | Negative |

|        |                       |          |
|--------|-----------------------|----------|
| P0C8E8 | RLLLCV LVVSDSKGLVSTIE | Negative |
| P0C8E8 | RALLARLLLCV LVVSDSKGL | Negative |
| P0C8E8 | LVSTIESRTSGDGADNFDVV  | Negative |
| P0C8E8 | SGDGADNFDVVSCNKNCTSG  | Negative |
| P0C8E8 | TIESRTSGDGADNFDVVSCN  | Negative |
| P0C8E8 | SRTSGDGADNFDVVSCNKNC  | Negative |
| P0C8E8 | TSGDGADNFDVVSCNKNCTS  | Negative |
| P0C8E8 | MRALLARLLLCV LVVSDSKG | Negative |
| P0C8G6 | SQLRWWVVSQ LLLLIVVCIL | Negative |
| P0C8G6 | ILDHSEGARVCPKIVPGLDK  | Negative |
| P0C8G6 | VVSQ LLLLIVVCILDHSEGA | Negative |
| P0C8G6 | SQ LLLLIVVCILDHSEGARV | Negative |
| P0C8G6 | Q LLLLIVVCILDHSEGARVC | Negative |
| P0C8G6 | LLIVVCILDHSEGARVCPK   | Negative |
| P0C8G6 | VVCILDHSEGARVCPKIVPG  | Negative |
| P0C8G6 | EGARVCPKIVPGLDKLRVG   | Negative |
| P0C8G6 | HSEGARVCPKIVPGLDKLRV  | Negative |
| P0C8G6 | VCPKIVPGLDKLRVGVDITK  | Negative |
| P0C8G6 | IVVCILDHSEGARVCPKIVP  | Negative |
| P0C8G6 | LIVVCILDHSEGARVCPKIV  | Negative |
| P0C8G6 | CPKIVPGLDKLRVGVDITKL  | Negative |
| P0C8G6 | DHSEGARVCPKIVPGLDKLR  | Negative |
| P0C8G6 | LLIVVCILDHSEGARVCPKI  | Negative |
| P0C8G6 | LDHSEGARVCPKIVPGLDKL  | Negative |
| P0C8G6 | WWVVSQ LLLLIVVCILDHSE | Negative |
| P0C8G6 | CILDHSEGARVCPKIVPGLD  | Negative |
| P0C8G6 | RVCPKIVPGLDKLRVGVDIT  | Negative |
| P0C8G6 | QLRWWVVSQ LLLLIVVCILD | Negative |
| P0C8G6 | WVVSQ LLLLIVVCILDHSEG | Negative |
| P0C8G6 | RWWVVSQ LLLLIVVCILDHS | Negative |
| P0C8G6 | SEGARVCPKIVPGLDKLRVG  | Negative |
| P0C8G6 | LRWWVVSQ LLLLIVVCILDH | Negative |
| P0C8G6 | MSQLRWWVVSQ LLLLIVVCI | Negative |
| P0C8G6 | ARVCPKIVPGLDKLRVGVDI  | Negative |
| P0C8G6 | VSQ LLLLIVVCILDHSEGAR | Negative |
| P0C8G6 | VCILDHSEGARVCPKIVPGL  | Negative |
| P0C8G6 | GARVCPKIVPGLDKLRVGVD  | Negative |
| P0C8G7 | LAVLALTESQAFTSVKLPRD  | Negative |
| P0C8G7 | IHFIMERHASIVAFLLAVLA  | Negative |
| P0C8G7 | HASIVAFLLAVLALTESQAF  | Negative |
| P0C8G7 | AFTSVKLPRDEHWPYNYVSI  | Negative |
| P0C8G7 | AFLAVLALTESQAFTSVKL   | Negative |
| P0C8G7 | ALTESQAFTSVKLPRDEHWP  | Negative |
| P0C8G7 | QAFTSVKLPRDEHWPYNYVS  | Negative |
| P0C8G7 | MVKKIHFIMERHASIVAFLL  | Negative |
| P0C8G7 | HFIMERHASIVAFLLAVLAL  | Negative |



|        |                      |          |
|--------|----------------------|----------|
| P0C8G7 | KKIHFIMERHASIVAFLAV  | Negative |
| P0C8G7 | IVAFLLAVLALTESQAFTSV | Negative |
| P0C8G7 | TESQAFTSVKLPRDEHWPYN | Negative |
| P0C8G7 | FIMERHASIVAFLAVLALT  | Negative |
| P0C8G7 | SIVAFLAVLALTESQAFTS  | Negative |
| P0C8G7 | VLALTESQAFTSVKLPRDEH | Negative |
| P0C8G7 | MERHASIVAFLAVLALTES  | Negative |
| P0C8G7 | FLLAVLALTESQAFTSVKLP | Negative |
| P0C8G7 | IMERHASIVAFLAVLALTE  | Negative |
| P0C8G7 | ERHASIVAFLAVLALTESQ  | Negative |
| P0C8G7 | RHASIVAFLAVLALTESQA  | Negative |
| P0C8G7 | VKKIHFIMERHASIVAFLA  | Negative |
| P0C8G7 | ASIVAFLAVLALTESQAFT  | Negative |
| P0C8G7 | LLAVLALTESQAFTSVKLPR | Negative |
| P0C8G7 | LALTESQAFTSVKLPRDEHW | Negative |
| P0C8G7 | KIHFIMERHASIVAFLAVL  | Negative |
| P0C8G7 | AVLALTESQAFTSVKLPRDE | Negative |
| P0C8G7 | ESQAFTSVKLPRDEHWPYNY | Negative |
| P0C8G7 | SQAFTSVKLPRDEHWPYNYV | Negative |
| P0C8G7 | LTESQAFTSVKLPRDEHPY  | Negative |
| P0C8Z8 | KVLAIALVTFTGTGVAQAA  | Negative |
| P0C8Z8 | TVFTGTGVAQAADVTAQAVA | Negative |
| P0C8Z8 | AADVTAQAVATWSATAKKDT | Negative |
| P0C8Z8 | TGTGVAQAADVTAQAVATWS | Negative |
| P0C8Z8 | GVAQAADVTAQAVATWSATA | Negative |
| P0C8Z8 | AVATWSATAKKDTTSKLVVT | Negative |
| P0C8Z8 | ALVTFTGTGVAQAADVTAQ  | Negative |
| P0C8Z8 | FTGTGVAQAADVTAQAVATW | Negative |
| P0C8Z8 | LVTFTGTGVAQAADVTAQA  | Negative |
| P0C8Z8 | AQAVATWSATAKKDTTSKLV | Negative |
| P0C8Z8 | VATWSATAKKDTTSKLVVTP | Negative |
| P0C8Z8 | TAQAVATWSATAKKDTTSKL | Negative |
| P0C8Z8 | AIALVTFTGTGVAQAADVT  | Negative |
| P0C8Z8 | VFTGTGVAQAADVTAQAVAT | Negative |
| P0C8Z8 | KKVLAIALVTFTGTGVAQA  | Negative |
| P0C8Z8 | VTQAVATWSATAKKDTTSK  | Negative |
| P0C8Z8 | VLAIALVTFTGTGVAQAAD  | Negative |
| P0C8Z8 | TGVAQAADVTAQAVATWSAT | Negative |
| P0C8Z8 | VAQAADVTAQAVATWSATAK | Negative |
| P0C8Z8 | LAIALVTFTGTGVAQAADV  | Negative |
| P0C8Z8 | QAADVTAQAVATWSATAKKD | Negative |
| P0C8Z8 | GTGVAQAADVTAQAVATWSA | Negative |
| P0C8Z8 | ADVTAQAVATWSATAKKDTT | Negative |
| P0C8Z8 | DVTAQAVATWSATAKKDSTS | Negative |
| P0C8Z8 | AQAADVTAQAVATWSATAKK | Negative |
| P0C8Z8 | VTFTGTGVAQAADVTAQAV  | Negative |

|        |                      |          |
|--------|----------------------|----------|
| P0C8Z8 | MKKKVLAIALVTVFTGTGVA | Negative |
| P0C8Z8 | QAVATWSATAKKDTTSKLVV | Negative |
| P0C8Z8 | KKKVLAIALVTVFTGTGVAQ | Negative |
| P0C908 | AVLIALFVCSMVIGIHGGVP | Negative |
| P0C908 | FAVLIALFVCSMVIGIHGGV | Negative |
| P0C908 | IGIHGGVPINVKCRGSRDCL | Negative |
| P0C908 | VIGIHGGVPINVKCRGSRDC | Negative |
| P0C908 | KVFFAVLIALFVCSMVIGIH | Negative |
| P0C908 | IHGGVPINVKCRGSRDCLDP | Negative |
| P0C908 | SMVIGIHGGVPINVKCRGSR | Negative |
| P0C908 | PINVKCRGSRDCLDPCKKAG | Negative |
| P0C908 | VKCRGSRDCLDPCKKAGMRF | Negative |
| P0C908 | GVPINVKCRGSRDCLDPCKK | Negative |
| P0C908 | FVCSMVIGIHGGVPINVKCR | Negative |
| P0C908 | INVKCRGSRDCLDPCKKAGM | Negative |
| P0C908 | KCRGSRDCLDPCKKAGMRFG | Negative |
| P0C908 | VPINVKCRGSRDCLDPCKKA | Negative |
| P0C908 | ALFVCSMVIGIHGGVPINVK | Negative |
| P0C908 | CSMVIGIHGGVPINVKCRGS | Negative |
| P0C908 | GIHGGVPINVKCRGSRDCLD | Negative |
| P0C908 | LFVCSMVIGIHGGVPINVKC | Negative |
| P0C908 | NVKCRGSRDCLDPCKKAGMR | Negative |
| P0C908 | MKVFFAVLIALFVCSMVIGI | Negative |
| P0C908 | IALFVCSMVIGIHGGVPINV | Negative |
| P0C908 | VFFAVLIALFVCSMVIGIHG | Negative |
| P0C908 | MVIGIHGGVPINVKCRGSRD | Negative |
| P0C908 | GGVPINVKCRGSRDCLDPCK | Negative |
| P0C908 | CRGSRDCLDPCKKAGMRFGK | Negative |
| P0C908 | FFAVLIALFVCSMVIGIHGG | Negative |
| P0C908 | VLIALFVCSMVIGIHGGVPI | Negative |
| P0C908 | VCSMVIGIHGGVPINVKCRG | Negative |
| P0C908 | HGGVPINVKCRGSRDCLDPC | Negative |
| P0CAR9 | LYQFGKMIKHKTGKSALLSY | Negative |
| P0CAR9 | KHKTGKSALLSYSAYGCYCG | Negative |
| P0CAR9 | EGNLYQFGKMIKHKTGKSAL | Negative |
| P0CAR9 | LMGVEGNLYQFGKMIKHKTG | Negative |
| P0CAR9 | HKTGKSALLSYSAYGCYCGW | Negative |
| P0CAR9 | QFGKMIKHKTGKSALLSYSA | Negative |
| P0CAR9 | MIKHKTGKSALLSYSAYGCY | Negative |
| P0CAR9 | GNLYQFGKMIKHKTGKSALL | Negative |
| P0CAR9 | MGVEGNLYQFGKMIKHKTGK | Negative |
| P0CAR9 | WLMGVEGNLYQFGKMIKHKT | Negative |
| P0CAR9 | YQFGKMIKHKTGKSALLSYS | Negative |
| P0CAR9 | NLYQFGKMIKHKTGKSALLS | Negative |
| P0CAR9 | VAVWLMGVEGNLYQFGKMIK | Negative |
| P0CAR9 | TGKSALLSYSAYGCYCGWGG | Negative |

|        |                      |          |
|--------|----------------------|----------|
| P0CAR9 | GKMIKHKTGKSALLSYSAYG | Negative |
| P0CAR9 | VWLMGVEGNLYQFGKMIKHK | Negative |
| P0CAR9 | GKSALLSYSAYGCYCGWGGQ | Negative |
| P0CAR9 | VEGNLYQFGKMIKHKTGKSA | Negative |
| P0CAR9 | MRTLWIVAVWLMGVEGNLYQ | Negative |
| P0CAR9 | AVWLMGVEGNLYQFGKMIKH | Negative |
| P0CAR9 | KTGKSALLSYSAYGCYCGWG | Negative |
| P0CAR9 | IKHKTGKSALLSYSAYGCYC | Negative |
| P0CAR9 | FGKMIKHKTGKSALLSYSAY | Negative |
| P0CAR9 | TLWIVAVWLMGVEGNLYQFG | Negative |
| P0CAR9 | WIVAVWLMGVEGNLYQFGKM | Negative |
| P0CAR9 | KMIKHKTGKSALLSYSAYGC | Negative |
| P0CAR9 | LWIVAVWLMGVEGNLYQFGK | Negative |
| P0CAR9 | IVAVWLMGVEGNLYQFGKMI | Negative |
| P0CAR9 | GVEGNLYQFGKMIKHKTGKS | Negative |
| P0CB51 | YYPVPEAPAEGGFRSVVYFV | Negative |
| P0CB51 | MPNYYPVPEAPAEGGFRSVV | Negative |
| P0CB51 | VQASSMSSMPNYYPVPEAPA | Negative |
| P0CB51 | LLTLQTLVQASSMSSMPNYY | Negative |
| P0CB51 | SSMPNYYPVPEAPAEGGFRS | Negative |
| P0CB51 | SMPNYYPVPEAPAEGGFRSV | Negative |
| P0CB51 | VPEAPAEGGFRSVVYFVNWA | Negative |
| P0CB51 | LTLQTLVQASSMSSMPNYYP | Negative |
| P0CB51 | TLVQASSMSSMPNYYPVPEA | Negative |
| P0CB51 | PEAPAEGGFRSVVYFVNWAI | Negative |
| P0CB51 | PVPEAPAEGGFRSVVYFVNW | Negative |
| P0CB51 | MRFLIGALLTLQTLVQASSM | Negative |
| P0CB51 | QASSMSSMPNYYPVPEAPAE | Negative |
| P0CB51 | IGALLTLQTLVQASSMSSMP | Negative |
| P0CB51 | QTLVQASSMSSMPNYYPVPE | Negative |
| P0CB51 | ASSMSSMPNYYPVPEAPAE  | Negative |
| P0CB51 | YPVPEAPAEGGFRSVVYFVN | Negative |
| P0CB51 | MSSMPNYYPVPEAPAEGGFR | Negative |
| P0CB51 | TLQTLVQASSMSSMPNYYPV | Negative |
| P0CB51 | LVQASSMSSMPNYYPVPEAP | Negative |
| P0CB51 | GALLTLQTLVQASSMSSMPN | Negative |
| P0CB51 | ALLTLQTLVQASSMSSMPNY | Negative |
| P0CB51 | SMSSMPNYYPVPEAPAEGGF | Negative |
| P0CB51 | SSMSSMPNYYPVPEAPAE   | Negative |
| P0CB51 | RFLIGALLTLQTLVQASSMS | Negative |
| P0CB51 | NYYPVPEAPAEGGFRSVVYF | Negative |
| P0CB51 | LIGALLTLQTLVQASSMSSM | Negative |
| P0CB51 | PNYYPVPEAPAEGGFRSVVY | Negative |
| P0CB51 | LQTLVQASSMSSMPNYYPVP | Negative |
| P0CK94 | LCSEYHNTQIYTINDKILSY | Negative |
| P0CK94 | ITELCSEYHNTQIYTINDKI | Negative |

|        |                      |          |
|--------|----------------------|----------|
| P0CK94 | SLCAHGAPQSITELCSEYHN | Negative |
| P0CK94 | FYVLFTALLSSLCAHGAPQS | Negative |
| P0CK94 | CAHGAPQSITELCSEYHNTQ | Negative |
| P0CK94 | LLSSLCAHGAPQSITELCSE | Negative |
| P0CK94 | ELCSEYHNTQIYTINDKILS | Negative |
| P0CK94 | TALLSSLCAHGAPQSITELC | Negative |
| P0CK94 | LFTALLSSLCAHGAPQSITE | Negative |
| P0CK94 | PQSITELCSEYHNTQIYTIN | Negative |
| P0CK94 | TELCSEYHNTQIYTINDKIL | Negative |
| P0CK94 | AHGAPQSITELCSEYHNTQI | Negative |
| P0CK94 | VLFTALLSSLCAHGAPQSIT | Negative |
| P0CK94 | MNKVKFYVLFTALLSSLCAH | Negative |
| P0CK94 | LSSLCAHGAPQSITELCSEY | Negative |
| P0CK94 | SSLCAHGAPQSITELCSEYH | Negative |
| P0CK94 | SITELCSEYHNTQIYTINDK | Negative |
| P0CK94 | ALLSSLCAHGAPQSITELCS | Negative |
| P0CK94 | GAPQSITELCSEYHNTQIYT | Negative |
| P0CK94 | LCAHGAPQSITELCSEYHNT | Negative |
| P0CK94 | FTALLSSLCAHGAPQSITEL | Negative |
| P0CK94 | NKVKFYVLFTALLSSLCAHG | Negative |
| P0CK94 | APQSITELCSEYHNTQIYTI | Negative |
| P0CK94 | CSEYHNTQIYTINDKILSYT | Negative |
| P0CK94 | KFYVLFTALLSSLCAHGAPQ | Negative |
| P0CK94 | KVKFYVLFTALLSSLCAHGA | Negative |
| P0CK94 | QSITELCSEYHNTQIYTIND | Negative |
| P0CK94 | HGAPQSITELCSEYHNTQIY | Negative |
| P0CK94 | VKFYVLFTALLSSLCAHGAP | Negative |
| P0CS93 | HKAVGTGIPEGSLQFLSLRA | Negative |
| P0CS93 | AVTVPHKAVGTGIPEGSLQF | Negative |
| P0CS93 | SSINAVAVTVPHKAVGTGIP | Negative |
| P0CS93 | AVAVTVPHKAVGTGIPEGSL | Negative |
| P0CS93 | IPEGSLQFLSLRASAPIGSA | Negative |
| P0CS93 | VAVTVPHKAVGTGIPEGSLQ | Negative |
| P0CS93 | SINAVAVTVPHKAVGTGIPE | Negative |
| P0CS93 | AVGTGIPEGSLQFLSLRASA | Negative |
| P0CS93 | ALCFSSINAVAVTVPHKAVG | Negative |
| P0CS93 | TVPHKAVGTGIPEGSLQFLS | Negative |
| P0CS93 | KHLLTLALCFSSINAVAVTV | Negative |
| P0CS93 | HLLTLALCFSSINAVAVTVP | Negative |
| P0CS93 | LTLALCFSSINAVAVTVPHK | Negative |
| P0CS93 | FSSINAVAVTVPHKAVGTGI | Negative |
| P0CS93 | VPHKAVGTGIPEGSLQFLSL | Negative |
| P0CS93 | VGTGIPEGSLQFLSLRASAP | Negative |
| P0CS93 | TGIPEGSLQFLSLRASAPIG | Negative |
| P0CS93 | VTVPBKAVGTGIPEGSLQFL | Negative |
| P0CS93 | KAVGTGIPEGSLQFLSLRAS | Negative |

|        |                       |          |
|--------|-----------------------|----------|
| P0CS93 | INAVAVTVPHKAVGTGIPEG  | Negative |
| P0CS93 | NAVAVTVPHKAVGTGIPEGS  | Negative |
| P0CS93 | LCFSSINAVAVTVPHKAVGT  | Negative |
| P0CS93 | MKHLLTLALCFSSINAVAVT  | Negative |
| P0CS93 | GIPEGSLQFLSLRASAPIGS  | Negative |
| P0CS93 | TLALCFSSINAVAVTVPHKA  | Negative |
| P0CS93 | GTGIPEGSLQFLSLRASAPI  | Negative |
| P0CS93 | PHKAVGTGIPEGSLQFLSLR  | Negative |
| P0CS93 | LLTLALCFSSINAVAVTVPH  | Negative |
| P0CS93 | LALCFSSINAVAVTVPHKAV  | Negative |
| P0CX77 | SLNTLLLSLFVAMSSGAPLL  | Negative |
| P0CX77 | EKNSSLPSIKIFGTGGTIAS  | Negative |
| P0CX77 | SLFVAMSSGAPLLKIREEKN  | Negative |
| P0CX77 | APLLKIREEKNSSLPSIKIF  | Negative |
| P0CX77 | NTLLLSLFVAMSSGAPLLKI  | Negative |
| P0CX77 | LLLSLFVAMSSGAPLLKIRE  | Negative |
| P0CX77 | VAMSSGAPLLKIREEKNSSL  | Negative |
| P0CX77 | AMSSGAPLLKIREEKNSSLP  | Negative |
| P0CX77 | IREEKNSSLPSIKIFGTGGT  | Negative |
| P0CX77 | LSLFVAMSSGAPLLKIREEK  | Negative |
| P0CX77 | PLLKIREEKNSSLPSIKIFG  | Negative |
| P0CX77 | LNTLLLSLFVAMSSGAPLLK  | Negative |
| P0CX77 | REEKNSSLPSIKIFGTGGTI  | Negative |
| P0CX77 | RSLNTLLLSLFVAMSSGAPL  | Negative |
| P0CX77 | KIREEKNSSLPSIKIFGTGG  | Negative |
| P0CX77 | LLSLFVAMSSGAPLLKIREE  | Negative |
| P0CX77 | TLLLSLFVAMSSGAPLLKIR  | Negative |
| P0CX77 | LLKIREEKNSSLPSIKIFGT  | Negative |
| P0CX77 | EEKNSSLPSIKIFGTGGTIA  | Negative |
| P0CX77 | SGAPLLKIREEKNSSLPSIK  | Negative |
| P0CX77 | SSLPSIKIFGTGGTIASKGS  | Negative |
| P0CX77 | SSGAPLLKIREEKNSSLPSI  | Negative |
| P0CX77 | FVAMSSGAPLLKIREEKNSS  | Negative |
| P0CX77 | MRSNTLLLSLFVAMSSGAP   | Negative |
| P0CX77 | NSSLPSIKIFGTGGTIASKG  | Negative |
| P0CX77 | MSSGAPLLKIREEKNSSLPS  | Negative |
| P0CX77 | LKIREEKNSSLPSIKIFGTG  | Negative |
| P0CX77 | GAPLLKIREEKNSSLPSIKI  | Negative |
| P0CX77 | KNSSLPSIKIFGTGGTIASK  | Negative |
| P0DJI8 | LGVSSRSFFSFLGEAFD GAR | Negative |
| P0DJI8 | FSFLGEAFDGARDMWRA YSD | Negative |
| P0DJI8 | LGEAFDGARDMWRA YSDMRE | Negative |
| P0DJI8 | VLGVSSRSFFSFLGEAFD GA | Negative |
| P0DJI8 | SFLGEAFDGARDMWRA YSDM | Negative |
| P0DJI8 | GEAFDGARDMWRA YSDMREA | Negative |
| P0DJI8 | MKLLTGLVFCSLVLGVSSRS  | Negative |

|        |                       |          |
|--------|-----------------------|----------|
| P0DJI8 | VFCSLVLGVSRSFFSFLGE   | Negative |
| P0DJI8 | SRSFFSFLGEAFDGARMWR   | Negative |
| P0DJI8 | SSRSFFSFLGEAFDGARMW   | Negative |
| P0DJI8 | AFDGARMWRAYSMDREANY   | Negative |
| P0DJI8 | LLTGLVFCSLVLGVSRSFF   | Negative |
| P0DJI8 | KLLTGLVFCSLVLGVSRSF   | Negative |
| P0DJI8 | LVFCSLVLGVSRSFFSFLG   | Negative |
| P0DJI8 | DGARMWRAYSMDREANYIG   | Negative |
| P0DJI8 | TGLVFCSLVLGVSRSFFSF   | Negative |
| P0DJI8 | GLVFCSLVLGVSRSFFSFL   | Negative |
| P0DJI8 | CSLVLGVSRSFFSFLGEAF   | Negative |
| P0DJI8 | EAFDGARMWRAYSMDREAN   | Negative |
| P0DJI8 | FFSFLGEAFDGARMWRAYS   | Negative |
| P0DJI8 | FLGEAFDGARMWRAYSMDR   | Negative |
| P0DJI8 | SLVLGVSSRSFFSFLGEAFD  | Negative |
| P0DJI8 | SFFSFLGEAFDGARMWRAY   | Negative |
| P0DJI8 | LVLGVSSRSFFSFLGEAFDG  | Negative |
| P0DJI8 | FCSLVLGVSSRSFFSFLGEA  | Negative |
| P0DJI8 | FDGARMWRAYSMDREANYI   | Negative |
| P0DJI8 | VSSRSFFSFLGEAFDGARM   | Negative |
| P0DJI8 | RSFFSFLGEAFDGARMWRA   | Negative |
| P0DJI8 | GVSSRSFFSFLGEAFDGARD  | Negative |
| P0DJJ8 | GSLVQLWKMIFQETGKEAAK  | Negative |
| P0DJJ8 | GVDGSLVQLWKMIFQETGKE  | Negative |
| P0DJJ8 | GKEAAKNYGLYGCNCGVGRR  | Negative |
| P0DJJ8 | SLVQLWKMIFQETGKEAAKN  | Negative |
| P0DJJ8 | KMIFQETGKEAAKNYGLYGC  | Negative |
| P0DJJ8 | LWIMAVLLLGVVDGSLVQLWK | Negative |
| P0DJJ8 | MAVLLLGVVDGSLVQLWKMIF | Negative |
| P0DJJ8 | QETGKEAAKNYGLYGCNCGV  | Negative |
| P0DJJ8 | ETGKEAAKNYGLYGCNCGVG  | Negative |
| P0DJJ8 | WIMAVLLLGVVDGSLVQLWKM | Negative |
| P0DJJ8 | TLWIMAVLLLGVVDGSLVQLW | Negative |
| P0DJJ8 | LLGVVDGSLVQLWKMIFQETG | Negative |
| P0DJJ8 | VQLWKMIFQETGKEAAKNYG  | Negative |
| P0DJJ8 | IMAVLLLGVVDGSLVQLWKMI | Negative |
| P0DJJ8 | DGSLVQLWKMIFQETGKEAA  | Negative |
| P0DJJ8 | WKMIFQETGKEAAKNYGLYG  | Negative |
| P0DJJ8 | LGVDGSLVQLWKMIFQETGK  | Negative |
| P0DJJ8 | QLWKMIFQETGKEAAKNYGL  | Negative |
| P0DJJ8 | VDGSLVQLWKMIFQETGKEA  | Negative |
| P0DJJ8 | FQETGKEAAKNYGLYGCNCG  | Negative |
| P0DJJ8 | MIFQETGKEAAKNYGLYGCN  | Negative |
| P0DJJ8 | AVLLLGVVDGSLVQLWKMIFQ | Negative |
| P0DJJ8 | LWKMIFQETGKEAAKNYGLY  | Negative |
| P0DJJ8 | LVQLWKMIFQETGKEAAKNY  | Negative |

|        |                       |          |
|--------|-----------------------|----------|
| P0DJJ8 | VLLLGVDGSLVQLWKMIFQE  | Negative |
| P0DJJ8 | IFQETGKEAAKNYGLYCNC   | Negative |
| P0DJJ8 | MRTLWIMAVLLLGVVDGSLVQ | Negative |
| P0DJJ8 | LLLGVDGSLVQLWKMIFQET  | Negative |
| P0DJJ8 | TGKEAAKNYGLYCNCGVGR   | Negative |
| P0DJJ9 | VGVDGSLVQLWKMIFQETGK  | Negative |
| P0DJJ9 | IFQETGKEAAKNYGLYCNC   | Negative |
| P0DJJ9 | DGSLVQLWKMIFQETGKEAA  | Negative |
| P0DJJ9 | LWKMIFQETGKEAAKNYGLY  | Negative |
| P0DJJ9 | IMAVLLVGVDGSLVQLWKMI  | Negative |
| P0DJJ9 | MRTLWIMAVLLVGVDGSLVQ  | Negative |
| P0DJJ9 | QLWKMIFQETGKEAAKNYGL  | Negative |
| P0DJJ9 | VLLVGVDGSLVQLWKMIFQE  | Negative |
| P0DJJ9 | TLWIMAVLLVGVDGSLVQLW  | Negative |
| P0DJJ9 | SLVQLWKMIFQETGKEAAKN  | Negative |
| P0DJJ9 | FQETGKEAAKNYGLYCNCG   | Negative |
| P0DJJ9 | ETGKEAAKNYGLYCNCGVG   | Negative |
| P0DJJ9 | WIMAVLLVGVDGSLVQLWKM  | Negative |
| P0DJJ9 | GVDGSLVQLWKMIFQETGKE  | Negative |
| P0DJJ9 | MIFQETGKEAAKNYGLYGCN  | Negative |
| P0DJJ9 | QETGKEAAKNYGLYCNCGV   | Negative |
| P0DJJ9 | GKEAAKNYGLYCNCGVGRR   | Negative |
| P0DJJ9 | KMIFQETGKEAAKNYGLYGC  | Negative |
| P0DJJ9 | LWIMAVLLVGVDGSLVQLWK  | Negative |
| P0DJJ9 | VQLWKMIFQETGKEAAKNYG  | Negative |
| P0DJJ9 | MAVLLVGVDGSLVQLWKMIF  | Negative |
| P0DJJ9 | LLVGVDGSLVQLWKMIFQET  | Negative |
| P0DJJ9 | AVLLVGVDGSLVQLWKMIFQ  | Negative |
| P0DJJ9 | LVQLWKMIFQETGKEAAKNY  | Negative |
| P0DJJ9 | WKMIFQETGKEAAKNYGLYG  | Negative |
| P0DJJ9 | LVGVDGSLVQLWKMIFQETG  | Negative |
| P0DJJ9 | GSLVQLWKMIFQETGKEAAK  | Negative |
| P0DJJ9 | VDGSLVQLWKMIFQETGKEA  | Negative |
| P0DJJ9 | TGKEAAKNYGLYCNCGVGR   | Negative |
| P0DKR6 | DLGYSLKCYQHGKVVTCHRD  | Negative |
| P0DKR6 | IVCLDLGYSLKCYQHGKVVT  | Negative |
| P0DKR6 | VVTCHRD MKFCYHNTGMPFR | Negative |
| P0DKR6 | LTLLVVTIVCLDLGYSLKCY  | Negative |
| P0DKR6 | CLDLGYSLKCYQHGKVVTCH  | Negative |
| P0DKR6 | KVVTCHRD MKFCYHNTGMPF | Negative |
| P0DKR6 | KCYQHGKVVTCHRD MKFCYH | Negative |
| P0DKR6 | VTIVCLDLGYSLKCYQHGKV  | Negative |
| P0DKR6 | TLLLTLVVVTIVCLDLGYSL  | Negative |
| P0DKR6 | YQHGKVVTCHRD MKFCYHNT | Negative |
| P0DKR6 | MKTLLLTLVVVTIVCLDLGY  | Negative |
| P0DKR6 | VVTIVCLDLGYSLKCYQHGK  | Negative |

|        |                       |          |
|--------|-----------------------|----------|
| P0DKR6 | LGYSLKCYQHKGKVVTCRDM  | Negative |
| P0DKR6 | KTLLLTLLVVTIVCLDLGYS  | Negative |
| P0DKR6 | HGKVVTCRDMKFCYHNTGM   | Negative |
| P0DKR6 | YSLKCYQHKGKVVTCRDMKF  | Negative |
| P0DKR6 | VCLDLGYSLKCYQHKGKVVTC | Negative |
| P0DKR6 | GKVVTCRDMKFCYHNTGMP   | Negative |
| P0DKR6 | QHKGKVVTCRDMKFCYHNTG  | Negative |
| P0DKR6 | CYQHKGKVVTCRDMKFCYHN  | Negative |
| P0DKR6 | LKCYQHKGKVVTCRDMKFCY  | Negative |
| P0DKR6 | LLTLLVVTIVCLDLGYSLK   | Negative |
| P0DKR6 | GYSLKCYQHKGKVVTCRDMK  | Negative |
| P0DKR6 | TIVCLDLGYSLKCYQHKGKV  | Negative |
| P0DKR6 | LDLGYSLKCYQHKGKVVTCR  | Negative |
| P0DKR6 | LVVTIVCLDLGYSLKCYQH   | Negative |
| P0DKR6 | SLKCYQHKGKVVTCRDMKFC  | Negative |
| P0DKR6 | LLLTLVVTIVCLDLGYSLK   | Negative |
| P0DKR6 | LLVVTIVCLDLGYSLKCYQH  | Negative |
| P0DL37 | MLTFDTTQAGDIKCSGTRQC  | Negative |
| P0DL37 | QAGDIKCSGTRQCWGPCKKQ  | Negative |
| P0DL37 | FDTTQAGDIKCSGTRQCWGP  | Negative |
| P0DL37 | TTQAGDIKCSGTRQCWGPCK  | Negative |
| P0DL37 | TFDTTQAGDIKCSGTRQCWG  | Negative |
| P0DL37 | LLLVTMMMLTFDTTQAGDI   | Negative |
| P0DL37 | TMMLTFDTTQAGDIKCSGTR  | Negative |
| P0DL37 | SGTRQCWGPCKKQTTCTNSK  | Negative |
| P0DL37 | YLLLVTMMMLTFDTTQAGD   | Negative |
| P0DL37 | DIKCSGTRQCWGPCKKQTTCT | Negative |
| P0DL37 | VVTMMMLTFDTTQAGDIKCS  | Negative |
| P0DL37 | KLIYLLLVTMMMLTFDTTQ   | Negative |
| P0DL37 | AKLIYLLLVTMMMLTFDTT   | Negative |
| P0DL37 | NAKLIYLLLVTMMMLTFDT   | Negative |
| P0DL37 | DTTQAGDIKCSGTRQCWGPC  | Negative |
| P0DL37 | MMLTFDTTQAGDIKCSGTRQ  | Negative |
| P0DL37 | LLVVTMMMLTFDTTQAGDIK  | Negative |
| P0DL37 | TTMMMLTFDTTQAGDIKCSGT | Negative |
| P0DL37 | AGDIKCSGTRQCWGPCKKQT  | Negative |
| P0DL37 | VVTMMMLTFDTTQAGDIKCSG | Negative |
| P0DL37 | CSGTRQCWGPCKKQTTCTNS  | Negative |
| P0DL37 | MNAKLIYLLLVTMMMLTFD   | Negative |
| P0DL37 | GDIKCSGTRQCWGPCKKQTT  | Negative |
| P0DL37 | TQAGDIKCSGTRQCWGPCKK  | Negative |
| P0DL37 | LTFDTTQAGDIKCSGTRQCW  | Negative |
| P0DL37 | IYLLLVTMMMLTFDTTQAG   | Negative |
| P0DL37 | IKCSGTRQCWGPCKKQTTCT  | Negative |
| P0DL37 | LIYLLLVTMMMLTFDTTQA   | Negative |
| P0DL37 | KCSGTRQCWGPCKKQTTCTN  | Negative |



|        |                       |          |
|--------|-----------------------|----------|
| P0DL40 | LKRCYQRRVAITAGGLKHRL  | Negative |
| P0DL40 | RRVAITAGGLKHRLMSSLII  | Negative |
| P0DL40 | AAQKLKRCYQRRVAITAGGL  | Negative |
| P0DL40 | LQAAAQKLKRCYQRRVAITA  | Negative |
| P0DL40 | IIWELSHMVDLQAAAQKLKR  | Negative |
| P0DL40 | YQRRVAITAGGLKHRLMSSL  | Negative |
| P0DL40 | HPIIWELSHMVDLQAAAQKL  | Negative |
| P0DL40 | AITAGGLKHRLMSSLIIII   | Negative |
| P0DL40 | QAAAQKLKRCYQRRVAITAG  | Negative |
| P0DL40 | DLQAAAQKLKRCYQRRVAIT  | Negative |
| P0DL40 | QKLKRCYQRRVAITAGGLKH  | Negative |
| P0DL40 | IWELSHMVDLQAAAQKLKRC  | Negative |
| P0DL40 | AAAQKLKRCYQRRVAITAGG  | Negative |
| P0DL40 | CYQRRVAITAGGLKHRLMSS  | Negative |
| P0DL40 | VAITAGGLKHRLMSSLIII   | Negative |
| P0DL40 | QRRVAITAGGLKHRLMSSLI  | Negative |
| P0DL40 | VDLQAAAQKLKRCYQRRVAI  | Negative |
| P0DL40 | PIIWELSHMVDLQAAAQKLK  | Negative |
| P0DL40 | MVDLQAAAQKLKRCYQRRVA  | Negative |
| P0DL40 | RCYQRRVAITAGGLKHRLMS  | Negative |
| P0DL40 | LSHMVDLQAAAQKLKRCYQR  | Negative |
| P0DL40 | KLKRCYQRRVAITAGGLKHR  | Negative |
| P0DL40 | RVAITAGGLKHRLMSSLIII  | Negative |
| P0DL40 | MHPIIWELSHMVDLQAAAQK  | Negative |
| P0DL40 | AQKLKRCYQRRVAITAGGLK  | Negative |
| P0DL40 | WELSHMVDLQAAAQKLKRCY  | Negative |
| P0DL40 | KRCYQRRVAITAGGLKHRLM  | Negative |
| P0DL40 | HMVDLQAAAQKLKRCYQRRV  | Negative |
| P0DL40 | SHMVDLQAAAQKLKRCYQRR  | Negative |
| P0DMD3 | TNFREFFEIQLAQETREINE  | Negative |
| P0DMD3 | LSLCLFLMLLKATHESNQQR  | Negative |
| P0DMD3 | MLLKATHESNQQRRTNFREF  | Negative |
| P0DMD3 | LLKATHESNQQRRTNFREFE  | Negative |
| P0DMD3 | LKATHESNQQRRTNFREFFEI | Negative |
| P0DMD3 | SKVLLSLCLFLMLLKATHES  | Negative |
| P0DMD3 | HESNQQRRTNFREFFEIQLAQ | Negative |
| P0DMD3 | LFLMLLKATHESNQQRRTNFR | Negative |
| P0DMD3 | LMLLKATHESNQQRRTNFREF | Negative |
| P0DMD3 | RTNFREFFEIQLAQETREIN  | Negative |
| P0DMD3 | QRTNFREFFEIQLAQETREI  | Negative |
| P0DMD3 | ESNQQRRTNFREFFEIQLAQE | Negative |
| P0DMD3 | TVSCSKVLLSLCLFLMLLKA  | Negative |
| P0DMD3 | SNQQRRTNFREFFEIQLAQET | Negative |
| P0DMD3 | ATHESNQQRRTNFREFFEIQL | Negative |
| P0DMD3 | VLLSLCLFLMLLKATHESNQ  | Negative |
| P0DMD3 | MTVSCSKVLLSLCLFLMLLK  | Negative |

|        |                       |          |
|--------|-----------------------|----------|
| P0DMD3 | FLMLLKATHESNQQRTNFRE  | Negative |
| P0DMD3 | NQQRTNFREFFEIQLAQETR  | Negative |
| P0DMD3 | CLFLMLLKATHESNQQRTNF  | Negative |
| P0DMD3 | LCLFLMLLKATHESNQQRTN  | Negative |
| P0DMD3 | VSCSKVLLSLCLFLMLLKAT  | Negative |
| P0DMD3 | QQRTNFREFFEIQLAQETRE  | Negative |
| P0DMD3 | SLCLFLMLLKATHESNQQRT  | Negative |
| P0DMD3 | CSKVLLSLCLFLMLLKATHE  | Negative |
| P0DMD3 | LLSLCLFLMLLKATHESNQQ  | Negative |
| P0DMD3 | KATHESNQQRTNFREFFEIQ  | Negative |
| P0DMD3 | THESNQQRTNFREFFEIQLA  | Negative |
| P0DMD3 | SCSKVLLSLCLFLMLLKATH  | Negative |
| P0DML2 | LCLPWLQEAGAVQTVPLSRL  | Negative |
| P0DML2 | MAPGSRTSLLAFALLCLPW   | Negative |
| P0DML2 | SRTSLLAFALLCLPWLQEA   | Negative |
| P0DML2 | LAFALLCLPWLQEAGAVQTV  | Negative |
| P0DML2 | VPLSRLFDHAMLQAHRAHQL  | Negative |
| P0DML2 | SLLAFALLCLPWLQEAGAV   | Negative |
| P0DML2 | LPWLQEAGAVQTVPLSRLFD  | Negative |
| P0DML2 | LLCLPWLQEAGAVQTVPLSR  | Negative |
| P0DML2 | VQTVPLSRLFDHAMLQAHRA  | Negative |
| P0DML2 | EAGAVQTVPLSRLFDHAMLQ  | Negative |
| P0DML2 | FALLCLPWLQEAGAVQTVPL  | Negative |
| P0DML2 | LLAFALLCLPWLQEAGAVQT  | Negative |
| P0DML2 | GAVQTVPLSRLFDHAMLQAH  | Negative |
| P0DML2 | PWLQEAGAVQTVPLSRLFDH  | Negative |
| P0DML2 | AGAVQTVPLSRLFDHAMLQA  | Negative |
| P0DML2 | AVQTVPLSRLFDHAMLQahr  | Negative |
| P0DML2 | LLAFALLCLPWLQEAGAVQ   | Negative |
| P0DML2 | APGSRTSLLAFALLCLPWL   | Negative |
| P0DML2 | WLQEAGAVQTVPLSRLFDHA  | Negative |
| P0DML2 | CLPWLQEAGAVQTVPLSRLF  | Negative |
| P0DML2 | ALLCLPWLQEAGAVQTVPLS  | Negative |
| P0DML2 | LQEAGAVQTVPLSRLFDHAM  | Negative |
| P0DML2 | QTVPLSRLFDHAMLQAHRAH  | Negative |
| P0DML2 | PGSRTSLLAFALLCLPWLQ   | Negative |
| P0DML2 | RTSLLAFALLCLPWLQEAG   | Negative |
| P0DML2 | TSLLAFALLCLPWLQEAGA   | Negative |
| P0DML2 | QEAGAVQTVPLSRLFDHAML  | Negative |
| P0DML2 | GSRTSLLAFALLCLPWLQE   | Negative |
| P0DML2 | TVPLSRLFDHAMLQAHRAHQ  | Negative |
| P0DMM8 | EGYLM DHEGCKLSCFIRPSG | Negative |
| P0DMM8 | GIVVECKEGYLM DHEGCKLS | Negative |
| P0DMM8 | MILFISCELLIGIVVECKEG  | Negative |
| P0DMM8 | GYLM DHEGCKLSCFIRPSGY | Negative |
| P0DMM8 | SCILLIGIVVECKEGYLM DH | Negative |

|        |                       |          |
|--------|-----------------------|----------|
| P0DMM8 | LLIGIVVECKEGYLMDEHGC  | Negative |
| P0DMM8 | IGIVVECKEGYLMDEHGCKL  | Negative |
| P0DMM8 | ECKEGYLMDEHGCKLSCFIR  | Negative |
| P0DMM8 | ISCILLIGIVVECKEGYLM   | Negative |
| P0DMM8 | KGMILFISCILLIGIVVECK  | Negative |
| P0DMM8 | IVVECKEGYLMDEHGCKLSC  | Negative |
| P0DMM8 | ILFISCILLIGIVVECKEGY  | Negative |
| P0DMM8 | YLMDEHGCKLSCFIRPSGYC  | Negative |
| P0DMM8 | HEGCKLSCFIRPSGYCGREC  | Negative |
| P0DMM8 | LMDHEGCKLSCFIRPSGYCG  | Negative |
| P0DMM8 | VVECKEGYLMDEHGCKLSCF  | Negative |
| P0DMM8 | KEYLMDEHGCKLSCFIRPS   | Negative |
| P0DMM8 | MDHEGCKLSCFIRPSGYCGR  | Negative |
| P0DMM8 | EGCKLSCFIRPSGYCGRECA  | Negative |
| P0DMM8 | GMILFISCILLIGIVVECKE  | Negative |
| P0DMM8 | CILLIGIVVECKEGYLMDE   | Negative |
| P0DMM8 | LIGIVVECKEGYLMDEHGCK  | Negative |
| P0DMM8 | MKGMILFISCILLIGIVVEC  | Negative |
| P0DMM8 | VECKEGYLMDEHGCKLSCFI  | Negative |
| P0DMM8 | ILLIGIVVECKEGYLMDEH   | Negative |
| P0DMM8 | DHEGCKLSCFIRPSGYCGRE  | Negative |
| P0DMM8 | GCKLSCFIRPSGYCGRECAI  | Negative |
| P0DMM8 | CKEYLMDEHGCKLSCFIRP   | Negative |
| P0DMM8 | FISCILLIGIVVECKEGYLM  | Negative |
| P0DN86 | LLSMGGTWASKEPLRPRCRP  | Negative |
| P0DN86 | LLLLLSMGGTWASKEPLRP   | Negative |
| P0DN86 | MFQGLLLLLLSMGGTWASK   | Negative |
| P0DN86 | QGLLLLLLSMGGTWASKEP   | Negative |
| P0DN86 | RCRPINATLAVEKEGCPVCI  | Negative |
| P0DN86 | LRPRCRPINATLAVEKEGCP  | Negative |
| P0DN86 | LSMGGTWASKEPLRPRCRPI  | Negative |
| P0DN86 | LLLLLSMGGTWASKEPLRPR  | Negative |
| P0DN86 | CRPINATLAVEKEGCPVCIT  | Negative |
| P0DN86 | LLLLLLLLSMGGTWASKEPLR | Negative |
| P0DN86 | ASKEPLRPRCRPINATLAVE  | Negative |
| P0DN86 | RPINATLAVEKEGCPVCITV  | Negative |
| P0DN86 | GTWASKEPLRPRCRPINATL  | Negative |
| P0DN86 | LLSMGGTWASKEPLRPRCR   | Negative |
| P0DN86 | FQGLLLLLLSMGGTWASKE   | Negative |
| P0DN86 | GGTWASKEPLRPRCRPINAT  | Negative |
| P0DN86 | MGGTWASKEPLRPRCRPINA  | Negative |
| P0DN86 | PRCRPINATLAVEKEGCPVC  | Negative |
| P0DN86 | PLRPRCRPINATLAVEKEGC  | Negative |
| P0DN86 | LLLLSMGGTWASKEPLRPRC  | Negative |
| P0DN86 | MEMFQGLLLLLLSMGGTWA   | Negative |
| P0DN86 | EPLRPRCRPINATLAVEKEG  | Negative |

|        |                      |          |
|--------|----------------------|----------|
| P0DN86 | SKEPLRPRCRPINATLAVEK | Negative |
| P0DN86 | WASKEPLRPRCRPINATLAV | Negative |
| P0DN86 | SMGGTWASKEPLRPRCRPIN | Negative |
| P0DN86 | KEPLRPRCRPINATLAVEKE | Negative |
| P0DN86 | TWASKEPLRPRCRPINATLA | Negative |
| P0DN86 | RPRCRPINATLAVEKEGCPV | Negative |
| P0DN86 | EMFQGLLLLLLLSMGGTWAS | Negative |
| P10082 | MVFVRRPWPALTTVLLALLV | Negative |
| P10082 | PIKPEAPREDASPEELNRY  | Negative |
| P10082 | YPIKPEAPREDASPEELNRY | Negative |
| P10082 | CLGALVDAYPIKPEAPREDA | Negative |
| P10082 | ALTTVLLALLVCLGALVDAY | Negative |
| P10082 | AYPIKPEAPREDASPEELNR | Negative |
| P10082 | DAYPIKPEAPREDASPEELN | Negative |
| P10082 | VDAYPIKPEAPREDASPEEL | Negative |
| P10082 | RRPWPALTTVLLALLVCLGA | Negative |
| P10082 | LLALLVCLGALVDAYPIKPE | Negative |
| P10082 | TTVLLALLVCLGALVDAYPI | Negative |
| P10082 | VRRPWPALTTVLLALLVCLG | Negative |
| P10082 | LVCLGALVDAYPIKPEAPRE | Negative |
| P10082 | PWPALTTVLLALLVCLGALV | Negative |
| P10082 | TVLLALLVCLGALVDAYPIK | Negative |
| P10082 | RPWPALTTVLLALLVCLGAL | Negative |
| P10082 | PALTTVLLALLVCLGALVDA | Negative |
| P10082 | GALVDAYPIKPEAPREDASP | Negative |
| P10082 | LGALVDAYPIKPEAPREDAS | Negative |
| P10082 | LLVCLGALVDAYPIKPEAPR | Negative |
| P10082 | LALLVCLGALVDAYPIKPEA | Negative |
| P10082 | FVRRPWPALTTVLLALLVCL | Negative |
| P10082 | VFVRRPWPALTTVLLALLVC | Negative |
| P10082 | LTTVLLALLVCLGALVDAYP | Negative |
| P10082 | VCLGALVDAYPIKPEAPRED | Negative |
| P10082 | ALLVCLGALVDAYPIKPEAP | Negative |
| P10082 | WPALTTVLLALLVCLGALVD | Negative |
| P10082 | LVDAYPIKPEAPREDASPEE | Negative |
| P10082 | ALVDAYPIKPEAPREDASPE | Negative |
| P10124 | QKLLKCSRLVLALALILVLE | Negative |
| P10124 | ALILVLESSVQGYPTRRARY | Negative |
| P10124 | ESSVQGYPTRRARYQWVRCN | Negative |
| P10124 | LALILVLESSVQGYPTRRAR | Negative |
| P10124 | TRRARYQWVRCNPDSNSANC | Negative |
| P10124 | KCSRLVLALALILVLESSVQ | Negative |
| P10124 | PTRRARYQWVRCNPDSNSAN | Negative |
| P10124 | KLLKCSRLVLALALILVLES | Negative |
| P10124 | LKCSRLVLALALILVLESSV | Negative |
| P10124 | ILVLESSVQGYPTRRARYQW | Negative |

|        |                      |          |
|--------|----------------------|----------|
| P10124 | SRLVLALALILVLESSVQGY | Negative |
| P10124 | QGYPTRRARYQWVRCNPDSN | Negative |
| P10124 | VQGYPTRRARYQWVRCNPDS | Negative |
| P10124 | SSVQGYPTRRARYQWVRCNP | Negative |
| P10124 | CSRLVLALALILVLESSVQG | Negative |
| P10124 | LVLALALILVLESSVQGYPT | Negative |
| P10124 | VLESSVQGYPTRRARYQWVR | Negative |
| P10124 | RLVLALALILVLESSVQGYP | Negative |
| P10124 | MMQKLLKCSRLVLALALILV | Negative |
| P10124 | SVQGYPTRRARYQWVRCNPD | Negative |
| P10124 | GYPTRRARYQWVRCNPDSNS | Negative |
| P10124 | LESSVQGYPTRRARYQWVRC | Negative |
| P10124 | LVLESSVQGYPTRRARYQWV | Negative |
| P10124 | LILVLESSVQGYPTRRARYQ | Negative |
| P10124 | ALALILVLESSVQGYPTRRA | Negative |
| P10124 | MQKLLKCSRLVLALALILVL | Negative |
| P10124 | YPTRRARYQWVRCNPDSNSA | Negative |
| P10124 | LLKCSRLVLALALILVLESS | Negative |
| P10124 | VLALALILVLESSVQGYPTR | Negative |
| P10144 | HSRPYMayLMIWDQKSLKRC | Negative |
| P10144 | LPRADAGEIIGGHEAKPHSR | Negative |
| P10144 | LLLLAFLLLPRADAGEIIGG | Negative |
| P10144 | DAGEIIGGHEAKPHSRPYMA | Negative |
| P10144 | PHSRPYMayLMIWDQKSLKR | Negative |
| P10144 | EAKPHSRPYMayLMIWDQKS | Negative |
| P10144 | HEAKPHSRPYMayLMIWDQK | Negative |
| P10144 | GHEAKPHSRPYMayLMIWDQ | Negative |
| P10144 | LAFLLLPRADAGEIIGGHEA | Negative |
| P10144 | IGGHEAKPHSRPYMayLMIW | Negative |
| P10144 | QPILLLLAFLLLPRADAGEI | Negative |
| P10144 | PRADAGEIIGGHEAKPHSRP | Negative |
| P10144 | GGHEAKPHSRPYMayLMIWD | Negative |
| P10144 | GEIIGGHEAKPHSRPYMAYL | Negative |
| P10144 | MQPILLLLAFLLLPRADAGE | Negative |
| P10144 | LLLAFLLLPRADAGEIIGGH | Negative |
| P10144 | EIIGGHEAKPHSRPYMayLM | Negative |
| P10144 | LLLPRADAGEIIGGHEAKPH | Negative |
| P10144 | LLAFLLLPRADAGEIIGGHE | Negative |
| P10144 | LLPRADAGEIIGGHEAKPHS | Negative |
| P10144 | AGEIIGGHEAKPHSRPYMAY | Negative |
| P10144 | FLLLPRADAGEIIGGHEAKP | Negative |
| P10144 | RADAGEIIGGHEAKPHSRPY | Negative |
| P10144 | IIGGHEAKPHSRPYMayLMI | Negative |
| P10144 | ADAGEIIGGHEAKPHSRPYM | Negative |
| P10144 | AKPHSRPYMayLMIWDQKSL | Negative |
| P10144 | AFLLLPRADAGEIIGGHEAK | Negative |

|        |                      |          |
|--------|----------------------|----------|
| P10144 | KPHSRPYMAYLMIWDQKSLK | Negative |
| P10144 | PILLLLAFLLLPRADAGEII | Negative |
| P10145 | AVLPRSAKELRCQCIKTYSK | Negative |
| P10145 | ISAALCEGAVLPRSAKELRC | Negative |
| P10145 | LAAFLISAALCEGAVLPRSA | Negative |
| P10145 | GAVLPRSAKELRCQCIKTYS | Negative |
| P10145 | AALCEGAVLPRSAKELRCQC | Negative |
| P10145 | EGAVLPRSAKELRCQCIKTY | Negative |
| P10145 | LAVALLAAFLISAALCEGAV | Negative |
| P10145 | VLPRSAKELRCQCIKTYSKP | Negative |
| P10145 | LPRSAKELRCQCIKTYSKPF | Negative |
| P10145 | FLISAALCEGAVLPRSAKEL | Negative |
| P10145 | SAKELRCQCIKTYSKPFHPK | Negative |
| P10145 | ALLAAFLISAALCEGAVLPR | Negative |
| P10145 | LCEGAVLPRSAKELRCQCIK | Negative |
| P10145 | LLAAFLISAALCEGAVLPRS | Negative |
| P10145 | VALLAAFLISAALCEGAVLP | Negative |
| P10145 | CEGAVLPRSAKELRCQCIKT | Negative |
| P10145 | KELRCQCIKTYSKPFHPKFI | Negative |
| P10145 | AKELRCQCIKTYSKPFHPKF | Negative |
| P10145 | AFLISAALCEGAVLPRSAKE | Negative |
| P10145 | PRSAKELRCQCIKTYSKPFH | Negative |
| P10145 | LISAALCEGAVLPRSAKELR | Negative |
| P10145 | KLAVALLAAFLISAALCEGA | Negative |
| P10145 | ALCEGAVLPRSAKELRCQCI | Negative |
| P10145 | TSKLAVALLAAFLISAALCE | Negative |
| P10145 | RSAKELRCQCIKTYSKPFHP | Negative |
| P10145 | SAALCEGAVLPRSAKELRCQ | Negative |
| P10145 | SKLAVALLAAFLISAALCEG | Negative |
| P10145 | AAFLISAALCEGAVLPRSAK | Negative |
| P10145 | MTSKLAVALLAAFLISAALC | Negative |
| P10147 | LAVLLCTMALCNQFSASLAA | Negative |
| P10147 | TMALCNQFSASLAADTPTAC | Negative |
| P10147 | ADTPTACCFSYTSRQIPQNF | Negative |
| P10147 | SLAADTPTACCFSYTSRQIP | Negative |
| P10147 | PTACCFSYTSRQIPQNFAD  | Negative |
| P10147 | NQFSASLAADTPTACCFSYT | Negative |
| P10147 | LCTMALCNQFSASLAADTPT | Negative |
| P10147 | LCNQFSASLAADTPTACCF  | Negative |
| P10147 | FSASLAADTPTACCFSYTSR | Negative |
| P10147 | ASLAADTPTACCFSYTSRQI | Negative |
| P10147 | STAALAVLLCTMALCNQFSA | Negative |
| P10147 | AADTPTACCFSYTSRQIPQN | Negative |
| P10147 | SASLAADTPTACCFSYTSRQ | Negative |
| P10147 | MQVSTAALAVLLCTMALCNQ | Negative |
| P10147 | QVSTAALAVLLCTMALCNQF | Negative |

|        |                      |          |
|--------|----------------------|----------|
| P10147 | TAALAVLLCTMALCNQFSAS | Negative |
| P10147 | VLLCTMALCNQFSASLAADT | Negative |
| P10147 | DTPTACCFSYTSRQIPQNF  | Negative |
| P10147 | ALCNQFSASLAADTPTACCF | Negative |
| P10147 | CTMALCNQFSASLAADTPTA | Negative |
| P10147 | CNQFSASLAADTPTACCFSY | Negative |
| P10147 | TPTACCFSYTSRQIPQNFIA | Negative |
| P10147 | LLCTMALCNQFSASLAADTP | Negative |
| P10147 | ALAVLLCTMALCNQFSASLA | Negative |
| P10147 | AALAVLLCTMALCNQFSASL | Negative |
| P10147 | MALCNQFSASLAADTPTACC | Negative |
| P10147 | VSTAALAVLLCTMALCNQFS | Negative |
| P10147 | LAADTPTACCFSYTSRQIPQ | Negative |
| P10147 | QFSASLAADTPTACCFSYTS | Negative |
| P10152 | MVMVLSPLLLVFILGLGLTP | Negative |
| P10152 | GLTPVAPAQDDYRYIHFLTQ | Negative |
| P10152 | YRYIHFLTQHYDAKPKGRND | Negative |
| P10152 | VLSPLLLVFILGLGLTPVAP | Negative |
| P10152 | QDDYRYIHFLTQHYDAKPKG | Negative |
| P10152 | LVFILGLGLTPVAPAQDDYR | Negative |
| P10152 | YIHFLTQHYDAKPKGRNDEY | Negative |
| P10152 | PLLLVFILGLGLTPVAPAQD | Negative |
| P10152 | DYRYIHFLTQHYDAKPKGRN | Negative |
| P10152 | PAQDDYRYIHFLTQHYDAKP | Negative |
| P10152 | LSPLLLVFILGLGLTPVAPA | Negative |
| P10152 | DDYRYIHFLTQHYDAKPKGR | Negative |
| P10152 | RYIHFLTQHYDAKPKGRNDE | Negative |
| P10152 | APAQDDYRYIHFLTQHYDAK | Negative |
| P10152 | FILGLGLTPVAPAQDDYRYI | Negative |
| P10152 | LGLGLTPVAPAQDDYRYIHF | Negative |
| P10152 | LLLVFILGLGLTPVAPAQDD | Negative |
| P10152 | PVAPAQDDYRYIHFLTQHYD | Negative |
| P10152 | LGLTPVAPAQDDYRYIHFLT | Negative |
| P10152 | TPVAPAQDDYRYIHFLTQHY | Negative |
| P10152 | VAPAQDDYRYIHFLTQHYDA | Negative |
| P10152 | LTPVAPAQDDYRYIHFLTQH | Negative |
| P10152 | ILGLGLTPVAPAQDDYRYIH | Negative |
| P10152 | MVLSPLLLVFILGLGLTPVA | Negative |
| P10152 | AQDDYRYIHFLTQHYDAKPK | Negative |
| P10152 | SPLLLVFILGLGLTPVAPAQ | Negative |
| P10152 | GLGLTPVAPAQDDYRYIHFL | Negative |
| P10152 | VMVLSPLLLVFILGLGLTPV | Negative |
| P10152 | VFILGLGLTPVAPAQDDYRY | Negative |
| P10153 | PQFTWAQWFETQHINMTSQQ | Negative |
| P10153 | KPPQFTWAQWFETQHINMTS | Negative |
| P10153 | LLLLLGLLAVEGSLHVKPPQ | Negative |

|        |                       |          |
|--------|-----------------------|----------|
| P10153 | MVPKLFTSQICLLLLLGLLA  | Negative |
| P10153 | LLGLLAVEGSLHVKPPQFT   | Negative |
| P10153 | KLFTSQICLLLLLGLLAVEG  | Negative |
| P10153 | FTSQICLLLLLGLLAVEGSL  | Negative |
| P10153 | PKLFTSQICLLLLLGLLAVE  | Negative |
| P10153 | VKPPQFTWAQWFETQHINMT  | Negative |
| P10153 | VEGSLHVKPPQFTWAQWFET  | Negative |
| P10153 | VPKLFTSQICLLLLLGLLAV  | Negative |
| P10153 | TSQICLLLLLGLLAVEGSLH  | Negative |
| P10153 | AVEGSLHVKPPQFTWAQWFE  | Negative |
| P10153 | GSLHVKPPQFTWAQWFETQH  | Negative |
| P10153 | LLAVEGSLHVKPPQFTWAQW  | Negative |
| P10153 | PPQFTWAQWFETQHINMTSQ  | Negative |
| P10153 | LFTSQICLLLLLGLLAVEGS  | Negative |
| P10153 | SQICLLLLLGLLAVEGSLHV  | Negative |
| P10153 | SLHVKPPQFTWAQWFETQHI  | Negative |
| P10153 | HVKPPQFTWAQWFETQHINM  | Negative |
| P10153 | CLLLLGLLAVEGSLHVKPP   | Negative |
| P10153 | LAVEGSLHVKPPQFTWAQWF  | Negative |
| P10153 | GLLAVEGSLHVKPPQFTWAQ  | Negative |
| P10153 | EGSLHVKPPQFTWAQWFETQ  | Negative |
| P10153 | QICLLLLLGLLAVEGSLHVK  | Negative |
| P10153 | LGLLAVEGSLHVKPPQFTWA  | Negative |
| P10153 | ICLLLLLGLLAVEGSLHVKP  | Negative |
| P10153 | LHVKPPQFTWAQWFETQHIN  | Negative |
| P10153 | LLGLLAVEGSLHVKPPQFTW  | Negative |
| P10163 | SSSEDVSQEESLFLISGKPE  | Negative |
| P10163 | SQEESLFLISGKPEGRRPQG  | Negative |
| P10163 | AESSSEDVSQEESLFLISGK  | Negative |
| P10163 | LLALSSAESSSEDVSQEESL  | Negative |
| P10163 | QEESLFLISGKPEGRRPQGG  | Negative |
| P10163 | DVSQEESLFLISGKPEGRRP  | Negative |
| P10163 | LFLISGKPEGRRPQGGNQPQ  | Negative |
| P10163 | SAESSSEDVSQEESLFLISG  | Negative |
| P10163 | EDVSQEESLFLISGKPEGRR  | Negative |
| P10163 | LSSAESSSEDVSQEESLFLI  | Negative |
| P10163 | LILLSVALLALSSAESSSED  | Negative |
| P10163 | ESSSEDVSQEESLFLISGKP  | Negative |
| P10163 | SSSEDVSQEESLFLISGKPEG | Negative |
| P10163 | ALLALSSAESSSEDVSQEES  | Negative |
| P10163 | VALLALSSAESSSEDVSQEE  | Negative |
| P10163 | FLISGKPEGRRPQGGNQPQR  | Negative |
| P10163 | SSAESSSEDVSQEESLFLIS  | Negative |
| P10163 | SVALLALSSAESSSEDVSQE  | Negative |
| P10163 | ESLFLISGKPEGRRPQGGNQ  | Negative |
| P10163 | SLFLISGKPEGRRPQGGNQP  | Negative |



|        |                      |          |
|--------|----------------------|----------|
| P10163 | ALSSAESSSEDVSQEESLFL | Negative |
| P10163 | ILLSVALLALSSAESSSEDV | Negative |
| P10163 | MLLILLSVALLALSSAESSS | Negative |
| P10163 | EESLFLISGKPEGRRPQGGN | Negative |
| P10163 | LALSSAESSSEDVSQEESLF | Negative |
| P10163 | LLSVALLALSSAESSSEDVS | Negative |
| P10163 | VSQEESLFLISGKPEGRRPQ | Negative |
| P10163 | LSVALLALSSAESSSEDVSQ | Negative |
| P10163 | SEDVSQEESLFLISGKPEGR | Negative |
| P10184 | ADIAFGIEVNCSLYASGIGK | Negative |
| P10184 | MRTARQFVQVALALCCFADI | Negative |
| P10184 | RTARQFVQVALALCCFADIA | Negative |
| P10184 | ALCCFADIAFGIEVNCSLYA | Negative |
| P10184 | RQFVQVALALCCFADIAFGI | Negative |
| P10184 | CCFADIAFGIEVNCSLYASG | Negative |
| P10184 | QFVQVALALCCFADIAFGIE | Negative |
| P10184 | LYASGIGKDGTSWVACPRNL | Negative |
| P10184 | ALALCCFADIAFGIEVNCSL | Negative |
| P10184 | SLYASGIGKDGTSWVACPRN | Negative |
| P10184 | VQVALALCCFADIAFGIEVN | Negative |
| P10184 | VALALCCFADIAFGIEVNCS | Negative |
| P10184 | CFADIAFGIEVNCSLYASGI | Negative |
| P10184 | FVQVALALCCFADIAFGIEV | Negative |
| P10184 | AFGIEVNCSLYASGIGKDG  | Negative |
| P10184 | LALCCFADIAFGIEVNCSLY | Negative |
| P10184 | IEVNCSLYASGIGKDGTSWV | Negative |
| P10184 | ARQFVQVALALCCFADIAFG | Negative |
| P10184 | VNCSLYASGIGKDGTSWVAC | Negative |
| P10184 | IAFGIEVNCSLYASGIGKDG | Negative |
| P10184 | FGIEVNCSLYASGIGKDGTS | Negative |
| P10184 | GIEVNCSLYASGIGKDGTSW | Negative |
| P10184 | TARQFVQVALALCCFADIAF | Negative |
| P10184 | NCSLYASGIGKDGTSWVACP | Negative |
| P10184 | EVNCSLYASGIGKDGTSWVA | Negative |
| P10184 | FADIAFGIEVNCSLYASGIG | Negative |
| P10184 | DIAFGIEVNCSLYASGIGKD | Negative |
| P10184 | LCCFADIAFGIEVNCSLYAS | Negative |
| P10184 | CSLYASGIGKDGTSWVACPR | Negative |
| P10256 | MLGLHVGTLISLFLCILLEP | Negative |
| P10256 | ILLEPVEGSLMQPCQPINQT | Negative |
| P10256 | LLEPVEGSLMQPCQPINQTV | Negative |
| P10256 | QPINQTVSLEKEGCPTCLVI | Negative |
| P10256 | GSLMQPCQPINQTVSLEKEG | Negative |
| P10256 | QPCQPINQTVSLEKEGCPTC | Negative |
| P10256 | LGLHVGTLISLFLCILLEPV | Negative |
| P10256 | LHVGTLSLFLCILLEPVEG  | Negative |

|        |                      |          |
|--------|----------------------|----------|
| P10256 | TLISLFLCILLEPVEGSLMQ | Negative |
| P10256 | PVEGSLMQPCQPINQTVSLE | Negative |
| P10256 | GLHVGTLISLFLCILLEPVE | Negative |
| P10256 | HVGTLISLFLCILLEPVEGS | Negative |
| P10256 | CQPINQTVSLEKEGCPTCLV | Negative |
| P10256 | EGSLMQPCQPINQTVSLEKE | Negative |
| P10256 | CILLEPVEGSLMQPCQPINQ | Negative |
| P10256 | LCILLEPVEGSLMQPCQPIN | Negative |
| P10256 | EPVEGSLMQPCQPINQTVSL | Negative |
| P10256 | VGTLISLFLCILLEPVEGSL | Negative |
| P10256 | ISLFLCILLEPVEGSLMQPC | Negative |
| P10256 | LMQPCQPINQTVSLEKEGCP | Negative |
| P10256 | GTLISLFLCILLEPVEGSLM | Negative |
| P10256 | PCQPINQTVSLEKEGCPTCL | Negative |
| P10256 | SLFLCILLEPVEGSLMQPCQ | Negative |
| P10256 | LFLCILLEPVEGSLMQPCQP | Negative |
| P10256 | FLCILLEPVEGSLMQPCQPI | Negative |
| P10256 | LEPVEGSLMQPCQPINQTVS | Negative |
| P10256 | MQPCQPINQTVSLEKEGCPT | Negative |
| P10256 | SLMQPCQPINQTVSLEKEGC | Negative |
| P10256 | VEGSLMQPCQPINQTVSLEK | Negative |
| P10257 | LMTLQLVVMAMLWVTPVRAG | Negative |
| P10257 | CRYGCRLNNMTIIVEREDCH | Negative |
| P10257 | RAGTECRYGCRLNNMTIIVE | Negative |
| P10257 | PVRAGTECRYGCRLNNMTII | Negative |
| P10257 | THLMTLQLVVMAMLWVTPVR | Negative |
| P10257 | LQLVVMAMLWVTPVRAGTEC | Negative |
| P10257 | AMLWVTPVRAGTECRYGCRL | Negative |
| P10257 | LVVMAMLWVTPVRAGTECRY | Negative |
| P10257 | YCTHMTLQLVVMAMLWVTP  | Negative |
| P10257 | MYCTHMTLQLVVMAMLWVT  | Negative |
| P10257 | LWVTPVRAGTECRYGCRLNN | Negative |
| P10257 | TPVRAGTECRYGCRLNNMTI | Negative |
| P10257 | ECRYGCRLNNMTIIVEREDC | Negative |
| P10257 | MAMLWVTPVRAGTECRYGCR | Negative |
| P10257 | YGCRLNNMTIIVEREDCHGS | Negative |
| P10257 | WVTPVRAGTECRYGCRLNNM | Negative |
| P10257 | GTECRYGCRLNNMTIIVERE | Negative |
| P10257 | VVMAMLWVTPVRAGTECRYG | Negative |
| P10257 | AGTECRYGCRLNNMTIIVER | Negative |
| P10257 | TLQLVVMAMLWVTPVRAGTE | Negative |
| P10257 | VMAMLWVTPVRAGTECRYGC | Negative |
| P10257 | HMTLQLVVMAMLWVTPVRA  | Negative |
| P10257 | VRAGTECRYGCRLNNMTIIV | Negative |
| P10257 | CTHMTLQLVVMAMLWVTPV  | Negative |
| P10257 | TECRYGCRLNNMTIIVERED | Negative |

|        |                      |          |
|--------|----------------------|----------|
| P10257 | VTPVRAGTECRYGCRLNMT  | Negative |
| P10257 | MLWVTPVRAGTECRYGCRLN | Negative |
| P10257 | MTLQLVVMAMLWVTPVRAGT | Negative |
| P10257 | RYGCRLNNMTIIVEREDCHG | Negative |
| P10279 | RPKPGGGWNTGGSRYPGQGS | Negative |
| P10279 | IGSWILVLFVAMWSDVGLCK | Negative |
| P10279 | VKSHIGSWILVLFVAMWSDV | Negative |
| P10279 | VAMWSDVGLCKKRPKPGGGW | Negative |
| P10279 | CKKRPKPGGGWNTGGSRYPG | Negative |
| P10279 | AMWSDVGLCKKRPKPGGGWN | Negative |
| P10279 | KRPKPGGGWNTGGSRYPGQG | Negative |
| P10279 | KSHIGSWILVLFVAMWSDVG | Negative |
| P10279 | VLFVAMWSDVGLCKKRPKPG | Negative |
| P10279 | LCKKRPKPGGGWNTGGSRYP | Negative |
| P10279 | PGGGWNTGGSRYPGQGSPGG | Negative |
| P10279 | MWSDVGLCKKRPKPGGGWNT | Negative |
| P10279 | HIGSWILVLFVAMWSDVGLC | Negative |
| P10279 | LFVAMWSDVGLCKKRPKPGG | Negative |
| P10279 | MVKSHIGSWILVLFVAMWSD | Negative |
| P10279 | SHIGSWILVLFVAMWSDVGL | Negative |
| P10279 | KPGGGWNTGGSRYPGQGSPG | Negative |
| P10279 | LVLFVAMWSDVGLCKKRPKP | Negative |
| P10279 | DVGLCKKRPKPGGGWNTGGS | Negative |
| P10279 | SWILVLFVAMWSDVGLCKKR | Negative |
| P10279 | FVAMWSDVGLCKKRPKPGGG | Negative |
| P10279 | PKPGGGWNTGGSRYPGQGSP | Negative |
| P10279 | KKRPKPGGGWNTGGSRYPGQ | Negative |
| P10279 | WILVLFVAMWSDVGLCKKR  | Negative |
| P10279 | VGLCKKRPKPGGGWNTGGSR | Negative |
| P10279 | SDVGLCKKRPKPGGGWNTGG | Negative |
| P10279 | GSWILVLFVAMWSDVGLCKK | Negative |
| P10279 | WSDVGLCKKRPKPGGGWNTG | Negative |
| P10279 | GLCKKRPKPGGGWNTGGSRY | Negative |
| P10281 | PFSCQNSTAVADSCCFNSPG | Negative |
| P10281 | PKDIPFSCQNSTAVADSCCF | Negative |
| P10281 | VFEFPSCPKDIPFSCQNSTA | Negative |
| P10281 | LGAMQLAAGAVFEFPSCPKD | Negative |
| P10281 | GMLALGAMQLAAGAVFEFPS | Negative |
| P10281 | DIPFSCQNSTAVADSCCFNS | Negative |
| P10281 | AGAVFEFPSCPKDIPFSCQN | Negative |
| P10281 | AMQLAAGAVFEFPSCPKDIP | Negative |
| P10281 | KDIPFSCQNSTAVADSCCFN | Negative |
| P10281 | CQNSTAVADSCCFNSPGGAL | Negative |
| P10281 | LALGAMQLAAGAVFEFPSCP | Negative |
| P10281 | SCPKDIPFSCQNSTAVADSC | Negative |
| P10281 | PSCPKDIPFSCQNSTAVADS | Negative |

|        |                      |          |
|--------|----------------------|----------|
| P10281 | SCQNSTAVADSCCFNSPGGA | Negative |
| P10281 | AVFEFPSCPKDIPFSCQNST | Negative |
| P10281 | GAVFEFPSCPKDIPFSCQNS | Negative |
| P10281 | QLAAGAVFEFPSCPKDIPFS | Negative |
| P10281 | GAMQLAAGAVFEFPSCPKDI | Negative |
| P10281 | ALGAMQLAAGAVFEFPSCPK | Negative |
| P10281 | FSCQNSTAVADSCCFNSPGG | Negative |
| P10281 | AAGAVFEFPSCPKDIPFSCQ | Negative |
| P10281 | FEFPSCPKDIPFSCQNSTAV | Negative |
| P10281 | FPSCPKDIPFSCQNSTAVAD | Negative |
| P10281 | LAAGAVFEFPSCPKDIPFSC | Negative |
| P10281 | EFPCPKDIPFSCQNSTAVA  | Negative |
| P10281 | IPFSCQNSTAVADSCCFNSP | Negative |
| P10281 | MGMLALGAMQLAAGAVFEFP | Negative |
| P10281 | MQLAAGAVFEFPSCPKDIPF | Negative |
| P10281 | CPKDIPFSCQNSTAVADSCC | Negative |
| P10282 | SATTCGSTNYSASQVRAAAN | Negative |
| P10282 | LAALVSLAVASPIESRQSAT | Negative |
| P10282 | AVASPIESRQSATTCGSTNY | Negative |
| P10282 | SLAVASPIESRQSATTCGST | Negative |
| P10282 | ESRQSATTCGSTNYSASQVR | Negative |
| P10282 | IESRQSATTCGSTNYSASQV | Negative |
| P10282 | RQSATTCGSTNYSASQVRAA | Negative |
| P10282 | TCGSTNYSASQVRAAANAAC | Negative |
| P10282 | IASLAALVSLAVASPIESRQ | Negative |
| P10282 | SLAALVSLAVASPIESRQSA | Negative |
| P10282 | FFKSIASLAALVSLAVASPI | Negative |
| P10282 | SIASLAALVSLAVASPIESR | Negative |
| P10282 | KSIASLAALVSLAVASPIES | Negative |
| P10282 | SRQSATTCGSTNYSASQVRA | Negative |
| P10282 | TTCGSTNYSASQVRAAANAA | Negative |
| P10282 | ALVSLAVASPIESRQSATTC | Negative |
| P10282 | LVSLAVASPIESRQSATTCG | Negative |
| P10282 | MLFFKSIASLAALVSLAVAS | Negative |
| P10282 | LAVASPIESRQSATTCGSTN | Negative |
| P10282 | VASPIESRQSATTCGSTNYS | Negative |
| P10282 | QSATTCGSTNYSASQVRAAA | Negative |
| P10282 | ASPIESRQSATTCGSTNYS  | Negative |
| P10282 | LFFKSIASLAALVSLAVASP | Negative |
| P10282 | SPIESRQSATTCGSTNYSAS | Negative |
| P10282 | FKSIASLAALVSLAVASPIE | Negative |
| P10282 | ASLAALVSLAVASPIESRQS | Negative |
| P10282 | VSLAVASPIESRQSATTCGS | Negative |
| P10282 | PIESRQSATTCGSTNYSASQ | Negative |
| P10282 | ATTCGSTNYSASQVRAAANA | Negative |
| P10297 | TWAVNTIIYNVGSTTISKYA | Negative |

|        |                      |          |
|--------|----------------------|----------|
| P10297 | MLVVTISIWLILAPTSTWAV | Negative |
| P10297 | VTISIWLILAPTSTWAVNTI | Negative |
| P10297 | VVTISIWLILAPTSTWAVNT | Negative |
| P10297 | KSMLVVTISIWLILAPTSTW | Negative |
| P10297 | IWLILAPTSTWAVNTIIYNV | Negative |
| P10297 | ILAPTSTWAVNTIIYNVGST | Negative |
| P10297 | LVVTISIWLILAPTSTWAVN | Negative |
| P10297 | APTSTWAVNTIIYNVGSTTI | Negative |
| P10297 | ISIWLIAPTSTWAVNTIIY  | Negative |
| P10297 | VGSTTISKYATFLNDRNEA  | Negative |
| P10297 | STWAVNTIIYNVGSTTISKY | Negative |
| P10297 | AVNTIIYNVGSTTISKYATF | Negative |
| P10297 | NTIIYNVGSTTISKYATFLN | Negative |
| P10297 | WLILAPTSTWAVNTIIYNVG | Negative |
| P10297 | PTSTWAVNTIIYNVGSTTIS | Negative |
| P10297 | SMLVVTISIWLILAPTSTWA | Negative |
| P10297 | WAVNTIIYNVGSTTISKYAT | Negative |
| P10297 | LILAPTSTWAVNTIIYNVGS | Negative |
| P10297 | TIIYNVGSTTISKYATFLND | Negative |
| P10297 | YNVGSTTISKYATFLNDRN  | Negative |
| P10297 | IYNVGSTTISKYATFLNDR  | Negative |
| P10297 | NVGSTTISKYATFLNDRNE  | Negative |
| P10297 | SIWLILAPTSTWAVNTIIYN | Negative |
| P10297 | MKSMLVVTISIWLILAPTST | Negative |
| P10297 | TSTWAVNTIIYNVGSTTISK | Negative |
| P10297 | IIYNVGSTTISKYATFLNDL | Negative |
| P10297 | VNTIIYNVGSTTISKYATFL | Negative |
| P10297 | LAPTSTWAVNTIIYNVGSTT | Negative |
| P10298 | NQRLFNNAVIRVQHLHQLAA | Negative |
| P10298 | VLVLLSVVLVSLLVNQGRAS | Negative |
| P10298 | SLLVNQGRASDNQRLFNNAV | Negative |
| P10298 | VLLSVVLVSLLVNQGRASDN | Negative |
| P10298 | VSLLVNQGRASDNQRLFNNA | Negative |
| P10298 | LVNQGRASDNQRLFNNAVIR | Negative |
| P10298 | VNQGRASDNQRLFNNAVIRV | Negative |
| P10298 | RVLVLLSVVLVSLLVNQGRA | Negative |
| P10298 | LVLLVNQGRASDNQRLFNN  | Negative |
| P10298 | RLFNNAVIRVQHLHQLAAKM | Negative |
| P10298 | LSVVLVSLLVNQGRASDNQR | Negative |
| P10298 | LLSVVLVSLLVNQGRASDNQ | Negative |
| P10298 | QGRASDNQRLFNNAVIRVQH | Negative |
| P10298 | QRLFNNAVIRVQHLHQLAAK | Negative |
| P10298 | FNNAVIRVQHLHQLAAKMIN | Negative |
| P10298 | RASDNQRLFNNAVIRVQHLH | Negative |
| P10298 | MARVLVLLSVVLVSLLVNQG | Negative |
| P10298 | GRASDNQRLFNNAVIRVQHL | Negative |

|        |                      |          |
|--------|----------------------|----------|
| P10298 | ARVLVLLSVVLVSLLVNQGR | Negative |
| P10298 | VLVSLLVNQGRASDNQRLFN | Negative |
| P10298 | LVLLSVVLVSLLVNQGRASD | Negative |
| P10298 | SDNQRLFNNAVIRVQHLHQL | Negative |
| P10298 | ASDNQRLFNNAVIRVQHLHQ | Negative |
| P10298 | NNAVIRVQHLHQLAAKMIND | Negative |
| P10298 | LLVNQGRASDNQRLFNNAVI | Negative |
| P10298 | VVLVSLLVNQGRASDNQRLF | Negative |
| P10298 | LFNNAVIRVQHLHQLAAKMI | Negative |
| P10298 | DNQRLFNNAVIRVQHLHQLA | Negative |
| P10298 | NQGRASDNQRLFNNAVIRVQ | Negative |
| P10354 | LCAGQVFALPVNSPMTKGDT | Negative |
| P10354 | TKVMKCVLEVISDSLSP    | Negative |
| P10354 | LLCAGQVFALPVNSPMTKGD | Negative |
| P10354 | PMTKGDTKVMKCVLEVISDS | Negative |
| P10354 | MRSSAALALLCAGQVFALP  | Negative |
| P10354 | QVFALPVNSPMTKGDTKVMK | Negative |
| P10354 | NSPMTKGDTKVMKCVLEVIS | Negative |
| P10354 | ALPVNSPMTKGDTKVMKCVL | Negative |
| P10354 | PVNSPMTKGDTKVMKCVLEV | Negative |
| P10354 | ALALLCAGQVFALPVNSPM  | Negative |
| P10354 | VFALPVNSPMTKGDTKVMKC | Negative |
| P10354 | SSAALALLCAGQVFALPVN  | Negative |
| P10354 | VNSPMTKGDTKVMKCVLEVI | Negative |
| P10354 | GDTKVMKCVLEVISDSLSP  | Negative |
| P10354 | MTKGDTKVMKCVLEVISDSL | Negative |
| P10354 | RSSAALALLCAGQVFALPV  | Negative |
| P10354 | GQVFALPVNSPMTKGDTKVM | Negative |
| P10354 | LPVNSPMTKGDTKVMKCVLE | Negative |
| P10354 | LLCAGQVFALPVNSPMTKG  | Negative |
| P10354 | FALPVNSPMTKGDTKVMKCV | Negative |
| P10354 | LALLCAGQVFALPVNSPMT  | Negative |
| P10354 | ALLCAGQVFALPVNSPMTK  | Negative |
| P10354 | DTKVMKCVLEVISDSLSP   | Negative |
| P10354 | CAGQVFALPVNSPMTKGDTK | Negative |
| P10354 | TKGDTKVMKCVLEVISDSL  | Negative |
| P10354 | AGQVFALPVNSPMTKGDTKV | Negative |
| P10354 | KGDTKVMKCVLEVISDSL   | Negative |
| P10354 | SPMTKGDTKVMKCVLEVISD | Negative |
| P10354 | AALALLCAGQVFALPVNSP  | Negative |
| P10384 | TQAWSAGFQLNEFSSSGLGR | Negative |
| P10384 | FTKSALAVAVALISTQAWSA | Negative |
| P10384 | TKSALAVAVALISTQAWSAG | Negative |
| P10384 | QLNEFSSSGLGRAYSGEGAI | Negative |
| P10384 | SALAVAVALISTQAWSAGFQ | Negative |
| P10384 | ALISTQAWSAGFQLNEFSSS | Negative |

|        |                       |          |
|--------|-----------------------|----------|
| P10384 | GFQLNEFSSSSGLGRAYSGEG | Negative |
| P10384 | QAWSAGFQLNEFSSSSGLGRA | Negative |
| P10384 | VALISTQAWSAGFQLNEFSS  | Negative |
| P10384 | TLFTKSALAVAVALISTQAW  | Negative |
| P10384 | LNEFSSSSGLGRAYSGEGAIA | Negative |
| P10384 | STQAWSAGFQLNEFSSSGLG  | Negative |
| P10384 | LFTKSALAVAVALISTQAWS  | Negative |
| P10384 | SAGFQLNEFSSSSGLGRAYSG | Negative |
| P10384 | AWSAGFQLNEFSSSSGLGRAY | Negative |
| P10384 | VAVALISTQAWSAGFQLNEF  | Negative |
| P10384 | MSQKTLFTKSALAVAVALIS  | Negative |
| P10384 | FQLNEFSSSSGLGRAYSGEGA | Negative |
| P10384 | WSAGFQLNEFSSSSGLGRAY  | Negative |
| P10384 | ISTQAWSAGFQLNEFSSSGL  | Negative |
| P10384 | KTLFTKSALAVAVALISTQA  | Negative |
| P10384 | AVAVALISTQAWSAGFQLNE  | Negative |
| P10384 | LAVAVALISTQAWSAGFQLN  | Negative |
| P10384 | QKTLFTKSALAVAVALISTQ  | Negative |
| P10384 | KSALAVAVALISTQAWSAGF  | Negative |
| P10384 | SQKTLFTKSALAVAVALIST  | Negative |
| P10384 | AVALISTQAWSAGFQLNEFS  | Negative |
| P10384 | AGFQLNEFSSSSGLGRAYSGE | Negative |
| P10384 | LISTQAWSAGFQLNEFSSSG  | Negative |
| P10424 | LKIGMCVGILGLSITSLVTF  | Negative |
| P10424 | LGLSITSLVTFTGGALQVEA  | Negative |
| P10424 | GMCVGILGLSITSLVTFTGG  | Negative |
| P10424 | CVGILGLSITSLVTFTGGAL  | Negative |
| P10424 | IGMCVGILGLSITSLVTFTG  | Negative |
| P10424 | GLSITSLVTFTGGALQVEAK  | Negative |
| P10424 | NKKMLKIGMCVGILGLSITS  | Negative |
| P10424 | ITSLVTFTGGALQVEAKEKT  | Negative |
| P10424 | KKMLKIGMCVGILGLSITSL  | Negative |
| P10424 | SITSLVTFTGGALQVEAKEK  | Negative |
| P10424 | MLKIGMCVGILGLSITSLVT  | Negative |
| P10424 | LSITSLVTFTGGALQVEAKE  | Negative |
| P10424 | TFTGGALQVEAKEKTGQVKH  | Negative |
| P10424 | GGALQVEAKEKTGQVKHKNQ  | Negative |
| P10424 | VGILGLSITSLVTFTGGALQ  | Negative |
| P10424 | ILGLSITSLVTFTGGALQVE  | Negative |
| P10424 | MKNKKMLKIGMCVGILGLSI  | Negative |
| P10424 | LVTFTGGALQVEAKEKTGQV  | Negative |
| P10424 | TGGALQVEAKEKTGQVKHKN  | Negative |
| P10424 | SLVTFTGGALQVEAKEKTGQ  | Negative |
| P10424 | ALQVEAKEKTGQVKHKNQAT  | Negative |
| P10424 | KIGMCVGILGLSITSLVTFT  | Negative |
| P10424 | GILGLSITSLVTFTGGALQV  | Negative |

|        |                      |          |
|--------|----------------------|----------|
| P10424 | KMLKIGMCVGILGLSITSLV | Negative |
| P10424 | KNKKMLKIGMCVGILGLSIT | Negative |
| P10424 | VTFTGGALQVEAKEKTGQVK | Negative |
| P10424 | TSLVTFTGGALQVEAKEKTG | Negative |
| P10424 | MCVGILGLSITSLVTFTGGA | Negative |
| P10424 | FTGGALQVEAKEKTGQVKHK | Negative |
| P10425 | FVSTISSVQASQKVEQIVIK | Negative |
| P10425 | CVSLLGTTQFVSTISSVQAS | Negative |
| P10425 | GLCVSLLGTTQFVSTISSVQ | Negative |
| P10425 | TQFVSTISSVQASQKVEQIV | Negative |
| P10425 | SSVQASQKVEQIVIKNETGT | Negative |
| P10425 | KKNTLLKVGLCVSLLGTTQF | Negative |
| P10425 | VSLLGTTQFVSTISSVQASQ | Negative |
| P10425 | LLGTTQFVSTISSVQASQKV | Negative |
| P10425 | LCVSLLGTTQFVSTISSVQA | Negative |
| P10425 | KNTLLKVGLCVSLLGTTQFV | Negative |
| P10425 | SLLGTTQFVSTISSVQASQK | Negative |
| P10425 | QFVSTISSVQASQKVEQIVI | Negative |
| P10425 | SVQASQKVEQIVIKNETGTI | Negative |
| P10425 | ASQKVEQIVIKNETGTISIS | Negative |
| P10425 | TTQFVSTISSVQASQKVEQI | Negative |
| P10425 | QASQKVEQIVIKNETGTISI | Negative |
| P10425 | STISSVQASQKVEQIVIKNE | Negative |
| P10425 | ISSVQASQKVEQIVIKNETG | Negative |
| P10425 | VGLCVSLLGTTQFVSTISSV | Negative |
| P10425 | VSTISSVQASQKVEQIVIKN | Negative |
| P10425 | KVGLCVSLLGTTQFVSTISS | Negative |
| P10425 | GTTQFVSTISSVQASQKVEQ | Negative |
| P10425 | LLKVGLCVSLLGTTQFVSTI | Negative |
| P10425 | MKKNTLLKVGLCVSLLGTTQ | Negative |
| P10425 | VQASQKVEQIVIKNETGTIS | Negative |
| P10425 | LKVGLCVSLLGTTQFVSTIS | Negative |
| P10425 | NTLLKVGLCVSLLGTTQFVS | Negative |
| P10425 | TLLKVGLCVSLLGTTQFVST | Negative |
| P10425 | TISSVQASQKVEQIVIKNET | Negative |
| P10456 | QQSSQPKTTKSCPPGENSCY | Negative |
| P10456 | LLLTLVVVTMVCLDLGYTRR | Negative |
| P10456 | LGYTRRCFNQQSSQPKTTKS | Negative |
| P10456 | DLGYTRRCFNQQSSQPKTTK | Negative |
| P10456 | GYTRRCFNQQSSQPKTTKSC | Negative |
| P10456 | SSQPKTTKSCPPGENSCYNK | Negative |
| P10456 | VCLDLGYTRRCFNQQSSQPK | Negative |
| P10456 | QSSQPKTTKSCPPGENSCYN | Negative |
| P10456 | MKTLLLTLVVVTMVCLDLGY | Negative |
| P10456 | KTLLLTLVVVTMVCLDLGYT | Negative |
| P10456 | LTLVVVTMVCLDLGYTRRCF | Negative |



|        |                      |          |
|--------|----------------------|----------|
| P10456 | MVCLDLGYTRRCFNQQSSQP | Negative |
| P10456 | LDLGYTRRCFNQQSSQPKTT | Negative |
| P10456 | VVTMVCLDLGYTRRCFNQQS | Negative |
| P10456 | LLTLVVVTMVCLDLGYTRRC | Negative |
| P10456 | FNQQSSQPKTTKSCPPGENS | Negative |
| P10456 | TLLLTLVVVTMVCLDLGYTR | Negative |
| P10456 | RRCFNQQSSQPKTTKSCPPG | Negative |
| P10456 | YTRRCFNQQSSQPKTTKSCP | Negative |
| P10456 | CFNQQSSQPKTTKSCPPGEN | Negative |
| P10456 | LVVVTMVCLDLGYTRRCFNQ | Negative |
| P10456 | TRRCFNQQSSQPKTTKSCPP | Negative |
| P10456 | VVVTMVCLDLGYTRRCFNQQ | Negative |
| P10456 | VTMVCLDLGYTRRCFNQQSS | Negative |
| P10456 | NQQSSQPKTTKSCPPGENSC | Negative |
| P10456 | RCFNQQSSQPKTTKSCPPGE | Negative |
| P10456 | CLDLGYTRRCFNQQSSQPKT | Negative |
| P10456 | SQPKTTKSCPPGENSCYNKQ | Negative |
| P10456 | TMVCLDLGYTRRCFNQQSSQ | Negative |
| P10457 | SQPKTTKSCPPGENSCYNKQ | Negative |
| P10457 | KTLLLTLVVVTVVCLDLGYT | Negative |
| P10457 | RCYNQQSSQPKTTKSCPPGE | Negative |
| P10457 | DLGYTRRCYNQQSSQPKTTK | Negative |
| P10457 | TLLLTLVVVTVVCLDLGYTR | Negative |
| P10457 | QSSQPKTTKSCPPGENSCYN | Negative |
| P10457 | VCLDLGYTRRCYNQQSSQPK | Negative |
| P10457 | CLDLGYTRRCYNQQSSQPKT | Negative |
| P10457 | VVVTVVCLDLGYTRRCYNQQ | Negative |
| P10457 | LLLTLVVVTVVCLDLGYTRR | Negative |
| P10457 | LDLGYTRRCYNQQSSQPKTT | Negative |
| P10457 | TVVCLDLGYTRRCYNQQSSQ | Negative |
| P10457 | RRCYNQQSSQPKTTKSCPPG | Negative |
| P10457 | LTLVVVTVVCLDLGYTRRCY | Negative |
| P10457 | GYTRRCYNQQSSQPKTTKSC | Negative |
| P10457 | YTRRCYNQQSSQPKTTKSCP | Negative |
| P10457 | TRRCYNQQSSQPKTTKSCPP | Negative |
| P10457 | LGYTRRCYNQQSSQPKTTKS | Negative |
| P10457 | YNQQSSQPKTTKSCPPGENS | Negative |
| P10457 | VVTVVCLDLGYTRRCYNQQS | Negative |
| P10457 | MKTLLLTLVVVTVVCLDLGY | Negative |
| P10457 | LLTLVVVTVVCLDLGYTRRC | Negative |
| P10457 | VTVVCLDLGYTRRCYNQQSS | Negative |
| P10457 | NQQSSQPKTTKSCPPGENSC | Negative |
| P10457 | LVVVTVVCLDLGYTRRCYNQ | Negative |
| P10457 | QQSSQPKTTKSCPPGENSCY | Negative |
| P10457 | SSQPKTTKSCPPGENSCYNK | Negative |
| P10457 | CYNQQSSQPKTTKSCPPGEN | Negative |

|        |                       |          |
|--------|-----------------------|----------|
| P10457 | VVCLDLGYTRRCYNQQSSQP  | Negative |
| P10459 | LTLVVVTIVCLDLGYTRRCF  | Negative |
| P10459 | HPSSQPQTNKSCPPGENSCY  | Negative |
| P10459 | CLDLGYTRRCFNHPSSQPQT  | Negative |
| P10459 | MKTLLTLVVVTIVCLDLGY   | Negative |
| P10459 | RRCFNHPSSQPQTNKSCPPG  | Negative |
| P10459 | CFNHPSSQPQTNKSCPPGEN  | Negative |
| P10459 | FNHPSSQPQTNKSCPPGENS  | Negative |
| P10459 | LLLTLVVVTIVCLDLGYTRR  | Negative |
| P10459 | PSSQPQTNKSCPPGENSCYN  | Negative |
| P10459 | VVTIVCLDLGYTRRCFNHPS  | Negative |
| P10459 | LDLGYTRRCFNHPSSQPQTN  | Negative |
| P10459 | YTRRCFNHPSSQPQTNKSCP  | Negative |
| P10459 | VTIVCLDLGYTRRCFNHPSS  | Negative |
| P10459 | LGYTRRCFNHPSSQPQTNKS  | Negative |
| P10459 | LVVVVTIVCLDLGYTRRCFNH | Negative |
| P10459 | RCFNHPSSQPQTNKSCPPGE  | Negative |
| P10459 | DLGYTRRCFNHPSSQPQTNK  | Negative |
| P10459 | GYTRRCFNHPSSQPQTNKSC  | Negative |
| P10459 | IVCLDLGYTRRCFNHPSSQP  | Negative |
| P10459 | KTLLTLVVVTIVCLDLGYT   | Negative |
| P10459 | LLTLVVVTIVCLDLGYTRRC  | Negative |
| P10459 | SQPQTNKSCPPGENSCYNKQ  | Negative |
| P10459 | VVVVTIVCLDLGYTRRCFNHP | Negative |
| P10459 | TRRCFNHPSSQPQTNKSCPP  | Negative |
| P10459 | TLLTLVVVTIVCLDLGYTR   | Negative |
| P10459 | TIVCLDLGYTRRCFNHPSSQ  | Negative |
| P10459 | NHPSSQPQTNKSCPPGENSC  | Negative |
| P10459 | VCLDLGYTRRCFNHPSSQPQ  | Negative |
| P10459 | SSQPQTNKSCPPGENSCYNK  | Negative |
| P10475 | RSISIFITCLLITLLTMGGM  | Negative |
| P10475 | SISIFITCLLITLLTMGGMI  | Negative |
| P10475 | SAAGTKTPVAKNGQLSIKGT  | Negative |
| P10475 | GMIASPASAAGTKTPVAKNG  | Negative |
| P10475 | TMGGMIASPASAAGTKTPVA  | Negative |
| P10475 | AAGTKTPVAKNGQLSIKGTQ  | Negative |
| P10475 | ASPASAAGTKTPVAKNGQLS  | Negative |
| P10475 | IFITCLLITLLTMGGMIASP  | Negative |
| P10475 | FITCLLITLLTMGGMIASPA  | Negative |
| P10475 | PASAAGTKTPVAKNGQLSIK  | Negative |
| P10475 | AGTKTPVAKNGQLSIKGTQL  | Negative |
| P10475 | MIASPASAAGTKTPVAKNGQ  | Negative |
| P10475 | ASAAGTKTPVAKNGQLSIKG  | Negative |
| P10475 | LLITLLTMGGMIASPASAAG  | Negative |
| P10475 | KRSISIFITCLLITLLTMGG  | Negative |
| P10475 | LITLLTMGGMIASPASAAGT  | Negative |

|        |                       |          |
|--------|-----------------------|----------|
| P10475 | TCLLITLLTMGGMIASPASA  | Negative |
| P10475 | ITCLLITLLTMGGMIASPAS  | Negative |
| P10475 | CLLITLLTMGGMIASPASAA  | Negative |
| P10475 | GGMIA SPASAAGTKTPVAKN | Negative |
| P10475 | ISIFITCLLITLLTMGGMIA  | Negative |
| P10475 | SPASAAGTKTPVAKNGQLSI  | Negative |
| P10475 | ITLLTMGGMIASPASAAGTK  | Negative |
| P10475 | MGGMIASPASAAGTKTPVAK  | Negative |
| P10475 | SIFITCLLITLLTMGGMIAS  | Negative |
| P10475 | MKRSISIFITCLLITLLTMG  | Negative |
| P10475 | IASPASAAGTKTPVAKNGQL  | Negative |
| P10475 | LTMGGMIASPASAAGTKTPV  | Negative |
| P10475 | LLTMGGMIASPASAAGTKTP  | Negative |
| P10477 | SVVAASPVKGFQVSGTKLLD  | Negative |
| P10477 | VSLVCVLVMLVSILGSFSVV  | Negative |
| P10477 | MKKIVSLVCVLVMLVSILGS  | Negative |
| P10477 | VKGFQVSGTKLLDASGNELV  | Negative |
| P10477 | VCVLVMLVSILGSFSVVAAS  | Negative |
| P10477 | CVLVMLVSILGSFSVVAASP  | Negative |
| P10477 | ASPVKGFQVSGTKLLDASGN  | Negative |
| P10477 | VMLVSILGSFSVVAASPVKG  | Negative |
| P10477 | AASPVKGFQVSGTKLLDASG  | Negative |
| P10477 | LGSFSVVAASPVKGFQVSGT  | Negative |
| P10477 | MLVSILGSFSVVAASPVKGF  | Negative |
| P10477 | KIVSLVCVLVMLVSILGSFS  | Negative |
| P10477 | SPVKGFQVSGTKLLDASGNE  | Negative |
| P10477 | KKIVSLVCVLVMLVSILGSF  | Negative |
| P10477 | VAASPVKGFQVSGTKLLDAS  | Negative |
| P10477 | VSILGSFSVVAASPVKGFQV  | Negative |
| P10477 | SLVCVLVMLVSILGSFSVVA  | Negative |
| P10477 | FSVVAASPVKGFQVSGTKLL  | Negative |
| P10477 | ILGSFSVVAASPVKGFQVSG  | Negative |
| P10477 | PVKGFQVSGTKLLDASGNEL  | Negative |
| P10477 | VVAASPVKGFQVSGTKLLDA  | Negative |
| P10477 | VLVMLVSILGSFSVVAASPV  | Negative |
| P10477 | IVSLVCVLVMLVSILGSFSV  | Negative |
| P10477 | LVSILGSFSVVAASPVKGFQ  | Negative |
| P10477 | SILGSFSVVAASPVKGFQVS  | Negative |
| P10477 | KGFQVSGTKLLDASGNELVM  | Negative |
| P10477 | LVMLVSILGSFSVVAASPVK  | Negative |
| P10477 | GSFSVVAASPVKGFQVSGTK  | Negative |
| P10477 | LVCVLVMLVSILGSFSVVA   | Negative |
| P10493 | NRQELFPFGPGQGDLELEAG  | Negative |
| P10493 | TWALLQLLLLVGPGGCLNRQ  | Negative |
| P10493 | LDASGCSWAMWTWALLQLLL  | Negative |
| P10493 | CLNRQELFPFGPGQGDLELE  | Negative |

|        |                      |          |
|--------|----------------------|----------|
| P10493 | ALLQLLLLVGPGGCLNRQEL | Negative |
| P10493 | ASGCSWAMWTWALLQLLLLV | Negative |
| P10493 | LLLLVGPGGCLNRQELFPFG | Negative |
| P10493 | QLLLLVGPGGCLNRQELFPF | Negative |
| P10493 | CSWAMWTWALLQLLLLVGPG | Negative |
| P10493 | GCLNRQELFPFGPGQGDLEL | Negative |
| P10493 | LLVGPGGCLNRQELFPFGPG | Negative |
| P10493 | WTWALLQLLLLVGPGGCLNR | Negative |
| P10493 | LQLLLLVGPGGCLNRQELFP | Negative |
| P10493 | LLQLLLLVGPGGCLNRQELF | Negative |
| P10493 | GGCLNRQELFPFGPGQGDLE | Negative |
| P10493 | LNRQELFPFGPGQGDLELEA | Negative |
| P10493 | GPGGCLNRQELFPFGPGQGD | Negative |
| P10493 | MWTWALLQLLLLVGPGGCLN | Negative |
| P10493 | GCSWAMWTWALLQLLLLVGP | Negative |
| P10493 | SWAMWTWALLQLLLLVGPGG | Negative |
| P10493 | VGPGGCLNRQELFPFGPGQG | Negative |
| P10493 | PGGCLNRQELFPFGPGQGD  | Negative |
| P10493 | DASGCSWAMWTWALLQLLLL | Negative |
| P10493 | AMWTWALLQLLLLVGPGGCL | Negative |
| P10493 | WAMWTWALLQLLLLVGPGGC | Negative |
| P10493 | LLVGPGGCLNRQELFPFGP  | Negative |
| P10493 | SGCSWAMWTWALLQLLLLVG | Negative |
| P10493 | LVGPGGCLNRQELFPFGPGQ | Negative |
| P10493 | MLDASGCSWAMWTWALLQLL | Negative |
| P10549 | SIVALLSVCFGLLTFLYSGS | Negative |
| P10549 | LLSVCFGLLTFLYSGSAFAV | Negative |
| P10549 | AFAVDKSQLTYDDIVNTGLA | Negative |
| P10549 | SGSAFAVDKSQLTYDDIVNT | Negative |
| P10549 | FRPSIVALLSVCFGLLTFLY | Negative |
| P10549 | SAFAVDKSQLTYDDIVNTGL | Negative |
| P10549 | GLLTFLYSGSAFAVDKSQLT | Negative |
| P10549 | DKSQLTYDDIVNTGLANVCP | Negative |
| P10549 | VCFGLLTFLYSGSAFAVDKS | Negative |
| P10549 | ALLSVCFGLLTFLYSGSAFA | Negative |
| P10549 | FAVDKSQLTYDDIVNTGLAN | Negative |
| P10549 | IVALLSVCFGLLTFLYSGSA | Negative |
| P10549 | FLYSGSAFAVDKSQLTYDDI | Negative |
| P10549 | VALLSVCFGLLTFLYSGSAF | Negative |
| P10549 | LLTFLYSGSAFAVDKSQLTY | Negative |
| P10549 | MRFRPSIVALLSVCFGLLTF | Negative |
| P10549 | LYSGSAFAVDKSQLTYDDIV | Negative |
| P10549 | FGLLTFLYSGSAFAVDKSQL | Negative |
| P10549 | VDKSQLTYDDIVNTGLANVC | Negative |
| P10549 | RPSIVALLSVCFGLLTFLYS | Negative |
| P10549 | PSIVALLSVCFGLLTFLYSG | Negative |

|        |                         |          |
|--------|-------------------------|----------|
| P10549 | LSVCFGLLTFLYSGSAFAVD    | Negative |
| P10549 | SVCFGLLTFLYSGSAFAVDK    | Negative |
| P10549 | YSGSAFAVDKSQLTYDDIVN    | Negative |
| P10549 | AVDKSQLTYDDIVNTGLANV    | Negative |
| P10549 | GSAFAVDKSQLTYDDIVNTG    | Negative |
| P10549 | TFLYSGSAFAVDKSQLTYDD    | Negative |
| P10549 | RFRPSIVALLSVCFGLLTFL    | Negative |
| P10549 | LTFLYSGSAFAVDKSQLTYD    | Negative |
| P10562 | GHS GGAEDESEESRAQNNP    | Negative |
| P10562 | HSGGAEDESEESRAQNNPY     | Negative |
| P10562 | FSARFPLWLLLG VVLLASVS   | Negative |
| P10562 | HSGHSGGAEDESEESRAQN     | Negative |
| P10562 | LLLG VVLLASVSASF A HSGH | Negative |
| P10562 | FPLWLLLG VVLLASVSASF A  | Negative |
| P10562 | MAFSARFPLWLLLG VVLLAS   | Negative |
| P10562 | WLLLG VVLLASVSASF A HSG | Negative |
| P10562 | SGHSGGAEDESEESRAQNN     | Negative |
| P10562 | LWLLLG VVLLASVSASF A HS | Negative |
| P10562 | SVSASF A HSGHSGGAEDES   | Negative |
| P10562 | VSASF A HSGHSGGAEDESE   | Negative |
| P10562 | SF A HSGHSGGAEDESEESR   | Negative |
| P10562 | LLASVSASF A HSGHSGGAE   | Negative |
| P10562 | AHSGHSGGAEDESEESRAQ     | Negative |
| P10562 | SARFPLWLLLG VVLLASVSA   | Negative |
| P10562 | FAHSGHSGGAEDESEESRA     | Negative |
| P10562 | VLLASVSASF A HSGHSGGEA  | Negative |
| P10562 | SASF A HSGHSGGAEDESEE   | Negative |
| P10562 | VVLLASVSASF A HSGHSGGE  | Negative |
| P10562 | ASVSASF A HSGHSGGAEDE   | Negative |
| P10562 | LG VVLLASVSASF A HSGHSG | Negative |
| P10562 | PLWLLLG VVLLASVSASF A H | Negative |
| P10562 | RFPLWLLLG VVLLASVSASF   | Negative |
| P10562 | ASF A HSGHSGGAEDESEES   | Negative |
| P10562 | GVVLLASVSASF A HSGHSGG  | Negative |
| P10562 | LASVSASF A HSGHSGGAEDE  | Negative |
| P10562 | ARFPLWLLLG VVLLASVSAS   | Negative |
| P10562 | AFSARFPLWLLLG VVLLASV   | Negative |
| P10607 | SCFLSQGAAIENQRLFNI A V  | Negative |
| P10607 | RLFNI A VSRVQHLHLLA QKM | Negative |
| P10607 | FLSQGAAIENQRLFNI A VSR  | Negative |
| P10607 | ENQRLFNI A VSRVQHLHLLA  | Negative |
| P10607 | QRLFNI A VSRVQHLHLLA QK | Negative |
| P10607 | LSQGAAIENQRLFNI A VSRV  | Negative |
| P10607 | AIENQRLFNI A VSRVQHLHL  | Negative |
| P10607 | LVSCFLSQGAAIENQRLFNI    | Negative |
| P10607 | PVLLVSCFLSQGAAIENQRL    | Negative |

|        |                       |          |
|--------|-----------------------|----------|
| P10607 | VLLVSCFLSQGAAIENQRLF  | Negative |
| P10607 | QVFLLMPVLLVSCFLSQGAA  | Negative |
| P10607 | LFNIAVSRVQHLHLLAQKMF  | Negative |
| P10607 | NQRLFNIAVSRVQHLHLLAQ  | Negative |
| P10607 | AAIENQRLFNIAVSRVQHLH  | Negative |
| P10607 | CFLSQGAAIENQRLFNIAVS  | Negative |
| P10607 | IENQRLFNIAVSRVQHLHLL  | Negative |
| P10607 | GAAIENQRLFNIAVSRVQHL  | Negative |
| P10607 | LLMPVLLVSCFLSQGAAIEN  | Negative |
| P10607 | NIAVSRVQHLHLLAQKMFND  | Negative |
| P10607 | VFLLMPVLLVSCFLSQGAAI  | Negative |
| P10607 | QGAAIENQRLFNIAVSRVQH  | Negative |
| P10607 | SQGAAIENQRLFNIAVSRVQ  | Negative |
| P10607 | FNIAVSRVQHLHLLAQKMFN  | Negative |
| P10607 | FLLMPVLLVSCFLSQGAAIE  | Negative |
| P10607 | LMPVLLVSCFLSQGAAIENQ  | Negative |
| P10607 | MGQVFLLMPVLLVSCFLSQG  | Negative |
| P10607 | LLVSCFLSQGAAIENQRLFN  | Negative |
| P10607 | VSCFLSQGAAIENQRLFNIA  | Negative |
| P10607 | GQVFLLMPVLLVSCFLSQGA  | Negative |
| P10619 | EAAPDQDEIQRLPGLAKQPS  | Negative |
| P10619 | LLLLVSWASRGEAAPDQDEI  | Negative |
| P10619 | FLLLLLLLLLVSWASRGEAA  | Negative |
| P10619 | PLLLLLLLLLVSWASRGE    | Negative |
| P10619 | IRAAPPPLLLLLLLLLLV    | Negative |
| P10619 | PPLLLLLLLLLVSWASRG    | Negative |
| P10619 | RAAPPPLLLLLLLLLVSW    | Negative |
| P10619 | APDQDEIQRLPGLAKQPSFR  | Negative |
| P10619 | SRGEAAPDQDEIQRLPGLAK  | Negative |
| P10619 | AAPDQDEIQRLPGLAKQPSF  | Negative |
| P10619 | MIRAAPPPLLLLLLLLLLV   | Negative |
| P10619 | GEAAPDQDEIQRLPGLAKQP  | Negative |
| P10619 | LVSASRGEAAPDQDEIQRL   | Negative |
| P10619 | APPPLLLLLLLLLVSWAS    | Negative |
| P10619 | PDQDEIQRLPGLAKQPSFRQ  | Negative |
| P10619 | LFLLLLLLLLVSWASRGEA   | Negative |
| P10619 | AAPPPLLLLLLLLLVSWA    | Negative |
| P10619 | SWASRGEAAPDQDEIQRLPG  | Negative |
| P10619 | RGEAAPDQDEIQRLPGLAKQ  | Negative |
| P10619 | LLLLLLLLVSWASRGEAAPD  | Negative |
| P10619 | ASRGEAAPDQDEIQRLPGLA  | Negative |
| P10619 | LLLLLLLLVSWASRGEAAP   | Negative |
| P10619 | LLLLLLLLVSWASRGEAAPDQ | Negative |
| P10619 | VSWASRGEAAPDQDEIQRLP  | Negative |
| P10619 | LLLVSWASRGEAAPDQDEIQ  | Negative |
| P10619 | WASRGEAAPDQDEIQRLPGL  | Negative |

|        |                        |          |
|--------|------------------------|----------|
| P10619 | LLLLVSWASRGEAAPDQDE    | Negative |
| P10619 | LLVSWASRGEAAPDQDEIQR   | Negative |
| P10619 | PPPLFLLLLLLLLLVSWASR   | Negative |
| P10631 | DAYPAKPEAPGEDASPEELS   | Negative |
| P10631 | VRRPWPVMVAMLLVLLACL    | Negative |
| P10631 | LVLLACL GALV DAYPAKPEA | Negative |
| P10631 | LLVLLACL GALV DAYPAKPE | Negative |
| P10631 | AYPAKPEAPGEDASPEELSR   | Negative |
| P10631 | AVRRPWPVMVAMLLVLLACL   | Negative |
| P10631 | LACL GALV DAYPAKPEAPGE | Negative |
| P10631 | WPVMVAMLLVLLACL GALV D | Negative |
| P10631 | PWPVMVAMLLVLLACL GALV  | Negative |
| P10631 | LLACL GALV DAYPAKPEAPG | Negative |
| P10631 | MVAVRRPWPVMVAMLLVLLA   | Negative |
| P10631 | LGALV DAYPAKPEAPGEDAS  | Negative |
| P10631 | RRPWPVMVAMLLVLLACLGA   | Negative |
| P10631 | PAKPEAPGEDASPEELSRYY   | Negative |
| P10631 | V DAYPAKPEAPGEDASPEEL  | Negative |
| P10631 | VMVAMLLVLLACL GALV DAY | Negative |
| P10631 | GALV DAYPAKPEAPGEDASP  | Negative |
| P10631 | ACL GALV DAYPAKPEAPGED | Negative |
| P10631 | VLLACL GALV DAYPAKPEAP | Negative |
| P10631 | AMLLVLLACL GALV DAYPAK | Negative |
| P10631 | ALV DAYPAKPEAPGEDASPE  | Negative |
| P10631 | PVMVAMLLVLLACL GALV DA | Negative |
| P10631 | VAVRRPWPVMVAMLLVLLAC   | Negative |
| P10631 | LV DAYPAKPEAPGEDASPEE  | Negative |
| P10631 | CL GALV DAYPAKPEAPGEDA | Negative |
| P10631 | VAMLLVLLACL GALV DAYPA | Negative |
| P10631 | MVAMLLVLLACL GALV DAYP | Negative |
| P10631 | YPAKPEAPGEDASPEELSR Y  | Negative |
| P10631 | RPWPVMVAMLLVLLACL GAL  | Negative |
| P10645 | NSPMNKG DTEVMKCIVEVIS  | Negative |
| P10645 | DTEVMKCIVEVISDTLSKPS   | Negative |
| P10645 | PVNSPMNKG DTEVMKCIVEV  | Negative |
| P10645 | RSA AVLALLCAGQVTALPV   | Negative |
| P10645 | LALLCAGQVTALPVNSPMN    | Negative |
| P10645 | VNSPMNKG DTEVMKCIVEVI  | Negative |
| P10645 | LLCAGQVTALPVNSPMNKG D  | Negative |
| P10645 | AVLALLCAGQVTALPVNSP    | Negative |
| P10645 | ALLCAGQVTALPVNSPMNK    | Negative |
| P10645 | LPVNSPMNKG DTEVMKCIVE  | Negative |
| P10645 | SA AVLALLCAGQVTALPVN   | Negative |
| P10645 | TEVMKCIVEVISDTLSKPS P  | Negative |
| P10645 | TALPVNSPMNKG DTEVMKCI  | Negative |
| P10645 | VLALLCAGQVTALPVNSPM    | Negative |

|        |                      |          |
|--------|----------------------|----------|
| P10645 | QVTALPVNSPMNKGDEVMK  | Negative |
| P10645 | KGDTEVMKCIVEVISDTLSK | Negative |
| P10645 | SPMNKGDEVMKCIVEVISD  | Negative |
| P10645 | LCAGQVTALPVNSPMNKGDT | Negative |
| P10645 | GQVTALPVNSPMNKGDEVM  | Negative |
| P10645 | GDTEVMKCIVEVISDTLSKP | Negative |
| P10645 | MNKGDEVMKCIVEVISDTL  | Negative |
| P10645 | AGQVTALPVNSPMNKGDEV  | Negative |
| P10645 | CAGQVTALPVNSPMNKGDE  | Negative |
| P10645 | PMNKGDEVMKCIVEVISDT  | Negative |
| P10645 | ALPVNSPMNKGDEVMKCIV  | Negative |
| P10645 | LLLCAGQVTALPVNSPMNKG | Negative |
| P10645 | VTALPVNSPMNKGDEVMKC  | Negative |
| P10645 | NKGDEVMKCIVEVISDTLS  | Negative |
| P10645 | MRSAAVLALLLCAGQVTALP | Negative |
| P10646 | NLAPAPLNADSEEDEEHTII | Negative |
| P10646 | PAPLNADSEEDEEHTIITDT | Negative |
| P10646 | PLNADSEEDEEHTIITDTL  | Negative |
| P10646 | YTMKKVHALWASVCLLLNLA | Negative |
| P10646 | WASVCLLLNLAPAPLNADSE | Negative |
| P10646 | LNADSEEDEEHTIITDTLPL | Negative |
| P10646 | LNAPAPLNADSEEDEEHTI  | Negative |
| P10646 | KVHALWASVCLLLNLAPAPL | Negative |
| P10646 | CLLLNLAPAPLNADSEEDEE | Negative |
| P10646 | DSEEDEEHTIITDTLPLK   | Negative |
| P10646 | VCLLLNLAPAPLNADSEEDE | Negative |
| P10646 | ASVCLLLNLAPAPLNADSEE | Negative |
| P10646 | VHALWASVCLLLNLAPAPLN | Negative |
| P10646 | SEEDEEHTIITDTLPLKL   | Negative |
| P10646 | KKVHALWASVCLLLNLAPAP | Negative |
| P10646 | LLNLAPAPLNADSEEDEEHT | Negative |
| P10646 | NADSEEDEEHTIITDTLPP  | Negative |
| P10646 | LAPAPLNADSEEDEEHTIIT | Negative |
| P10646 | HALWASVCLLLNLAPAPLNA | Negative |
| P10646 | APAPLNADSEEDEEHTIITD | Negative |
| P10646 | MIYTMKKVHALWASVCLLLN | Negative |
| P10646 | APLNADSEEDEEHTIITDTE | Negative |
| P10646 | LLNLAPAPLNADSEEDEEH  | Negative |
| P10646 | LWASVCLLLNLAPAPLNADS | Negative |
| P10646 | IYTMKKVHALWASVCLLLNL | Negative |
| P10646 | ADSEEDEEHTIITDTLPL   | Negative |
| P10646 | MKKVHALWASVCLLLNLAPA | Negative |
| P10646 | TMKKVHALWASVCLLLNLAP | Negative |
| P10646 | ALWASVCLLLNLAPAPLNAD | Negative |
| P10673 | SLCSDSEEMKALEADLLTN  | Negative |
| P10673 | CMILLAFSSWSLCSDSEEM  | Negative |



|        |                      |          |
|--------|----------------------|----------|
| P10673 | FSSWSLCSDSEEEMKALEAD | Negative |
| P10673 | EEEMKALEADLLTNMHTSKI | Negative |
| P10673 | KIQLVCMILLAFSSWSLCSD | Negative |
| P10673 | AGMKIQLVCMILLAFSSWSL | Negative |
| P10673 | EMKALEADLLTNMHTSKISK | Negative |
| P10673 | WSLCSDSEEEMKALEADLLT | Negative |
| P10673 | LCSDSEEEMKALEADLLTNM | Negative |
| P10673 | ILLAFSSWSLCSDSEEEMKA | Negative |
| P10673 | AFSSWSLCSDSEEEMKALEA | Negative |
| P10673 | SSWSLCSDSEEEMKALEADL | Negative |
| P10673 | DSEEEMKALEADLLTNMHTS | Negative |
| P10673 | SEEEMKALEADLLTNMHTSK | Negative |
| P10673 | QLVCMILLAFSSWSLCSDSE | Negative |
| P10673 | MAGMKIQLVCMILLAFSSWS | Negative |
| P10673 | EEMKALEADLLTNMHTSKIS | Negative |
| P10673 | SWSLCSDSEEEMKALEADLL | Negative |
| P10673 | MILLAFSSWSLCSDSEEEMK | Negative |
| P10673 | CSDSEEEMKALEADLLTNMH | Negative |
| P10673 | GMKIQLVCMILLAFSSWSLC | Negative |
| P10673 | IQLVCMILLAFSSWSLCSDS | Negative |
| P10673 | VCMILLAFSSWSLCSDSEEE | Negative |
| P10673 | LLAFSSWSLCSDSEEEMKAL | Negative |
| P10673 | MMAGMKIQLVCMILLAFSSW | Negative |
| P10673 | MKALEADLLTNMHTSKISKA | Negative |
| P10673 | LAFSSWSLCSDSEEEMKALE | Negative |
| P10673 | MKIQLVCMILLAFSSWSLCS | Negative |
| P10673 | SDSEEEMKALEADLLTNMHT | Negative |
| P10675 | LLLLTLAADRASAKGEKSL  | Negative |
| P10675 | RLTALMLLLLLTLAADRASA | Negative |
| P10675 | ASAKGEKSLEYKIRDDPDLS | Negative |
| P10675 | EKSLEYKIRDDPDLSQFYSW | Negative |
| P10675 | LAADRASAKGEKSLEYKIRD | Negative |
| P10675 | AADRASAKGEKSLEYKIRDD | Negative |
| P10675 | AKGEKSLEYKIRDDPDLSQF | Negative |
| P10675 | LMLLLLLTLAADRASAKGEK | Negative |
| P10675 | GPRLTALMLLLLLTLAADRA | Negative |
| P10675 | LLTLAADRASAKGEKSLEY  | Negative |
| P10675 | MEGPRLTALMLLLLLTLAAD | Negative |
| P10675 | LTALMLLLLLTLAADRASAK | Negative |
| P10675 | PRLTALMLLLLLTLAADRAS | Negative |
| P10675 | EGPRLTALMLLLLLTLAADR | Negative |
| P10675 | KGEKSLEYKIRDDPDLSQFY | Negative |
| P10675 | SAKGEKSLEYKIRDDPDLSQ | Negative |
| P10675 | TLAADRASAKGEKSLEYKIR | Negative |
| P10675 | TALMLLLLLTLAADRASAKG | Negative |
| P10675 | LEYKIRDDPDLSQFYSWLEH | Negative |

|        |                       |          |
|--------|-----------------------|----------|
| P10675 | DRASAKGEKSLEYKIRDDPD  | Negative |
| P10675 | ADRASAKGEKSLEYKIRDDP  | Negative |
| P10675 | LLLLTLAADRASAKGEKSLE  | Negative |
| P10675 | ALMLLLLLTLAADRASAKGE  | Negative |
| P10675 | RASAKGEKSLEYKIRDDPDL  | Negative |
| P10675 | LLTLAADRASAKGEKSLEYK  | Negative |
| P10675 | GEKSLEYKIRDDPDLSQFYS  | Negative |
| P10675 | KSLEYKIRDDPDLSQFYSWL  | Negative |
| P10675 | SLEYKIRDDPDLSQFYSWLE  | Negative |
| P10675 | LTLAADRASAKGEKSLEYKI  | Negative |
| P10720 | FLALLLLPVVAFARAEAE    | Negative |
| P10720 | MSSAARSRLTRATRQEMLFL  | Negative |
| P10720 | TRATRQEMLFLALLLLPVVV  | Negative |
| P10720 | RQEMLFLALLLLPVVAFAR   | Negative |
| P10720 | ALLLLPVVAFARAEAEEDG   | Negative |
| P10720 | VAFARAEAEEDGDLQCLCVK  | Negative |
| P10720 | LLLPVVAFARAEAEEDGDL   | Negative |
| P10720 | AFARAEAEEDGDLQCLCVKT  | Negative |
| P10720 | LLPVVAFARAEAEEDGDLQ   | Negative |
| P10720 | RATRQEMLFLALLLLPVVVA  | Negative |
| P10720 | LALLLLPVVAFARAEAEED   | Negative |
| P10720 | AARSRLTRATRQEMLFLALL  | Negative |
| P10720 | LTRATRQEMLFLALLLLPVV  | Negative |
| P10720 | VVAFARAEAEEDGDLQCLCV  | Negative |
| P10720 | QEMLFLALLLLPVVAFARA   | Negative |
| P10720 | LFLALLLLPVVAFARAEAE   | Negative |
| P10720 | ATRQEMLFLALLLLPVVAF   | Negative |
| P10720 | ARSRLTRATRQEMLFLALL   | Negative |
| P10720 | PVVVAFARAEAEEDGDLQCL  | Negative |
| P10720 | RLTRATRQEMLFLALLLLPV  | Negative |
| P10720 | LLLLPVVAFARAEAEEDGD   | Negative |
| P10720 | LPVVAFARAEAEEDGDLQC   | Negative |
| P10720 | SRLTRATRQEMLFLALLLP   | Negative |
| P10720 | RSRLTRATRQEMLFLALLL   | Negative |
| P10720 | SSAARSRLTRATRQEMLFLA  | Negative |
| P10720 | SAARSRLTRATRQEMLFLAL  | Negative |
| P10720 | VVAFARAEAEEDGDLQCLC   | Negative |
| P10720 | TRQEMLFLALLLLPVVAF    | Negative |
| P10720 | MLFLALLLLPVVAFARAEA   | Negative |
| P10745 | LCGLAGPHTLHFQPSLVDMA  | Negative |
| P10745 | GLAGPHTLHFQPSLVDMKV   | Negative |
| P10745 | SVLLCGLAGPHTLHFQPSLV  | Negative |
| P10745 | LMSVLLCGLAGPHTLHFQPSL | Negative |
| P10745 | VLLCGLAGPHTLHFQPSLVD  | Negative |
| P10745 | MSVLLCGLAGPHTLHFQPSLV | Negative |
| P10745 | LDMKVLLDNYCFPENLLGM   | Negative |

|        |                      |          |
|--------|----------------------|----------|
| P10745 | EWVLLMSVLLCGLAGPTHLF | Negative |
| P10745 | WVLLMSVLLCGLAGPTHLFQ | Negative |
| P10745 | SLVLDMAKVLLDNYCFPENL | Negative |
| P10745 | LLMSVLLCGLAGPTHLFQPS | Negative |
| P10745 | LLCGLAGPTHLFQPSLVLD  | Negative |
| P10745 | HLFQPSLVLDMAKVLLDNYC | Negative |
| P10745 | FQPSLVLDMAKVLLDNYCFP | Negative |
| P10745 | VLDMAKVLLDNYCFPENLLG | Negative |
| P10745 | MMREWVLLMSVLLCGLAGPT | Negative |
| P10745 | LFQPSLVLDMAKVLLDNYCF | Negative |
| P10745 | PSLVLDMAKVLLDNYCFPEN | Negative |
| P10745 | THLFQPSLVLDMAKVLLDNY | Negative |
| P10745 | VLLMSVLLCGLAGPTHLFQP | Negative |
| P10745 | AGPTHLFQPSLVLDMAKVLL | Negative |
| P10745 | CGLAGPTHLFQPSLVLDMAK | Negative |
| P10745 | DMAKVLLDNYCFPENLLGMQ | Negative |
| P10745 | QPSLVLDMAKVLLDNYCFPE | Negative |
| P10745 | GPTHLFQPSLVLDMAKVLLD | Negative |
| P10745 | LVLDMAKVLLDNYCFPENLL | Negative |
| P10745 | MREWVLLMSVLLCGLAGPTH | Negative |
| P10745 | LAGPTHLFQPSLVLDMAKVL | Negative |
| P10745 | PTHLFQPSLVLDMAKVLLDN | Negative |
| P10758 | LLSCLMVLSPSQGQAEEDL  | Negative |
| P10758 | SQGQAEEDLPSARITCPEG  | Negative |
| P10758 | EDLPSARITCPEGSNAYSSY | Negative |
| P10758 | LPSARITCPEGSNAYSSYCY | Negative |
| P10758 | AEEDLPSARITCPEGSNAYS | Negative |
| P10758 | PSQGQAEEDLPSARITCPE  | Negative |
| P10758 | QGQAEEDLPSARITCPEGS  | Negative |
| P10758 | ILLSCLMVLSPSQGQAEED  | Negative |
| P10758 | EAEEDLPSARITCPEGSNAY | Negative |
| P10758 | LSCLMVLSPSQGQAEEDLP  | Negative |
| P10758 | SCLMVLSPSQGQAEEDLPS  | Negative |
| P10758 | SARITCPEGSNAYSSYCYFY | Negative |
| P10758 | QAEEDLPSARITCPEGSNA  | Negative |
| P10758 | TRNKYFILLSCLMVLSPSQG | Negative |
| P10758 | RNKYFILLSCLMVLSPSQGQ | Negative |
| P10758 | YFILLSCLMVLSPSQGQAE  | Negative |
| P10758 | LMVLSPSQGQAEEDLPSAR  | Negative |
| P10758 | PSARITCPEGSNAYSSYCY  | Negative |
| P10758 | LSPSQGQAEEDLPSARITC  | Negative |
| P10758 | MVLSPSQGQAEEDLPSARI  | Negative |
| P10758 | EEDLPSARITCPEGSNAYSS | Negative |
| P10758 | GQAEEDLPSARITCPEGSN  | Negative |
| P10758 | DLPSARITCPEGSNAYSSYC | Negative |
| P10758 | CLMVLSPSQGQAEEDLPSA  | Negative |

|        |                       |          |
|--------|-----------------------|----------|
| P10758 | MTRNKYFILLSCLMVLSPSQ  | Negative |
| P10758 | SPSQGQEAEDLPSARITCP   | Negative |
| P10758 | VLSPSQGQEAEDLPSARIT   | Negative |
| P10758 | KYFILLSCLMVLSPSQGQEA  | Negative |
| P10758 | NKYFILLSCLMVLSPSQGQE  | Negative |
| P10762 | EAVQQLNHTIVNAAHELHET  | Negative |
| P10762 | AVAAQARPDAAGHVNIAEAV  | Negative |
| P10762 | TLLAVLMLAVAAQARPDAAG  | Negative |
| P10762 | AGHVNIAEAVQQLNHTIVNA  | Negative |
| P10762 | QARPDAAGHVNIAEAVQQLN  | Negative |
| P10762 | DAAGHVNIAEAVQQLNHTIV  | Negative |
| P10762 | LMLAVAAQARPDAAGHVNIA  | Negative |
| P10762 | AQARPDAAGHVNIAEAVQQL  | Negative |
| P10762 | MLAVAAQARPDAAGHVNIAE  | Negative |
| P10762 | PDAAGHVNIAEAVQQLNHTI  | Negative |
| P10762 | LAVLMLAVAAQARPDAAGHV  | Negative |
| P10762 | ARPDAAGHVNIAEAVQQLNH  | Negative |
| P10762 | GHVNIAEAVQQLNHTIVNAA  | Negative |
| P10762 | AVQQLNHTIVNAAHELHETL  | Negative |
| P10762 | IAEAVQQLNHTIVNAAHELH  | Negative |
| P10762 | MNTLLAVLMLAVAAQARPDA  | Negative |
| P10762 | VQQLNHTIVNAAHELHETLG  | Negative |
| P10762 | AEAVQQLNHTIVNAAHELHE  | Negative |
| P10762 | AAGHVNIAEAVQQLNHTIVN  | Negative |
| P10762 | AAQARPDAAGHVNIAEAVQQ  | Negative |
| P10762 | VAAQARPDAAGHVNIAEAVQ  | Negative |
| P10762 | VLMLAVAAQARPDAAGHVNI  | Negative |
| P10762 | NIAEAVQQLNHTIVNAAHEL  | Negative |
| P10762 | AVLMLAVAAQARPDAAGHVN  | Negative |
| P10762 | RPDAAGHVNIAEAVQQLNHT  | Negative |
| P10762 | HVNIAEAVQQLNHTIVNAAH  | Negative |
| P10762 | VNIAEAVQQLNHTIVNAAHE  | Negative |
| P10762 | LAVAAQARPDAAGHVNIAEA  | Negative |
| P10762 | LLAVLMLAVAAQARPDAAGH  | Negative |
| P10764 | ETLCGGELVDTLQFVCGDRG  | Negative |
| P10764 | MGITAGKSMLALLAFLAFAS  | Negative |
| P10764 | AYRPSETLCGGELVDTLQFV  | Negative |
| P10764 | ALLAFLAFASCCYAAAYRPSE | Negative |
| P10764 | LAFLAFASCCYAAAYRPSETL | Negative |
| P10764 | PSETLCGGELVDTLQFVCGD  | Negative |
| P10764 | YRPSETLCGGELVDTLQFVC  | Negative |
| P10764 | SMLALLAFLAFASCCYAAAYR | Negative |
| P10764 | AFLAFASCCYAAAYRPSETLC | Negative |
| P10764 | GKSMLALLAFLAFASCCYAA  | Negative |
| P10764 | MLALLAFLAFASCCYAAAYRP | Negative |
| P10764 | KSMLALLAFLAFASCCYAAAY | Negative |

|        |                       |          |
|--------|-----------------------|----------|
| P10764 | GITAGKSMLALLAFLAFASC  | Negative |
| P10764 | AAYRPSETLCGGELVDTLQF  | Negative |
| P10764 | ASCCYAAAYRPSETLCGGELV | Negative |
| P10764 | LLAFLAFASCCYAAAYRPSET | Negative |
| P10764 | FASCCYAAAYRPSETLCGGEL | Negative |
| P10764 | RPSETLCGGELVDTLQFVCG  | Negative |
| P10764 | AFASCCYAAAYRPSETLCGGE | Negative |
| P10764 | LAFASCCYAAAYRPSETLCGG | Negative |
| P10764 | SCCYAAAYRPSETLCGGELVD | Negative |
| P10764 | FLAFASCCYAAAYRPSETLCG | Negative |
| P10764 | AGKSMLALLAFLAFASCCYA  | Negative |
| P10764 | YAAAYRPSETLCGGELVDTLQ | Negative |
| P10764 | CCYAAAYRPSETLCGGELVDT | Negative |
| P10764 | SETLCGGELVDTLQFVCGDR  | Negative |
| P10764 | TAGKSMLALLAFLAFASCCY  | Negative |
| P10764 | ITAGKSMLALLAFLAFASCC  | Negative |
| P10764 | CYAAAYRPSETLCGGELVDTL | Negative |
| P10813 | LQSPQGFNAFPQMSLSNLFT  | Negative |
| P10813 | FPQMSLSNLFTNAVIRAQHL  | Negative |
| P10813 | VVICLQSPQGFNAFPQMSLS  | Negative |
| P10813 | PQMSLSNLFTNAVIRAQHLH  | Negative |
| P10813 | ASGLGSSLVLLVVICLQSPQ  | Negative |
| P10813 | SSLVLLVVICLQSPQGFNAF  | Negative |
| P10813 | MASGLGSSLVLLVVICLQSP  | Negative |
| P10813 | SLVLLVVICLQSPQGFNAFP  | Negative |
| P10813 | ICLQSPQGFNAFPQMSLSNL  | Negative |
| P10813 | LGSSLVLLVVICLQSPQGFN  | Negative |
| P10813 | VICLQSPQGFNAFPQMSLSN  | Negative |
| P10813 | QSPQGFNAFPQMSLSNLFTN  | Negative |
| P10813 | CLQSPQGFNAFPQMSLSNLF  | Negative |
| P10813 | SGLGSSLVLLVVICLQSPQG  | Negative |
| P10813 | PQGFNAFPQMSLSNLFTNAV  | Negative |
| P10813 | GLGSSLVLLVVICLQSPQGF  | Negative |
| P10813 | VLLVVICLQSPQGFNAFPQM  | Negative |
| P10813 | LVLLVVICLQSPQGFNAFPQ  | Negative |
| P10813 | GFNAFPQMSLSNLFTNAVIR  | Negative |
| P10813 | FNAFPQMSLSNLFTNAVIRA  | Negative |
| P10813 | AFPQMSLSNLFTNAVIRAQH  | Negative |
| P10813 | QGFNAFPQMSLSNLFTNAVI  | Negative |
| P10813 | QMSLSNLFTNAVIRAQHLHQ  | Negative |
| P10813 | GSSLVLLVVICLQSPQGFNA  | Negative |
| P10813 | SLSNLFTNAVIRAQHLHQM   | Negative |
| P10813 | SPQGFNAFPQMSLSNLFTNA  | Negative |
| P10813 | LVVICLQSPQGFNAFPQMSL  | Negative |
| P10813 | MSLSNLFTNAVIRAQHLHQM  | Negative |
| P10813 | NAFPQMSLSNLFTNAVIRAQ  | Negative |

|        |                        |          |
|--------|------------------------|----------|
| P10820 | FLLLPRVPAPCYTATRSEC    | Negative |
| P10820 | LLPRVPAPCYTATRSECKQ    | Negative |
| P10820 | LFLLLPRVPAPCYTATRSE    | Negative |
| P10820 | VPAPCYTATRSECKQKHKFV   | Negative |
| P10820 | LLGLFLLLPRVPAPCYTAT    | Negative |
| P10820 | MATCLFLLGLFLLLPRVPA    | Negative |
| P10820 | ATRSECKQKHKFVPGVWMAG   | Negative |
| P10820 | RSECKQKHKFVPGVWMAGEG   | Negative |
| P10820 | LLLPRVPAPCYTATRSECK    | Negative |
| P10820 | LGLFLLLPRVPAPCYTATR    | Negative |
| P10820 | PAPCYTATRSECKQKHKFVP   | Negative |
| P10820 | RPVPAPCYTATRSECKQKHK   | Negative |
| P10820 | TCLFLLGLFLLLPRVPAPC    | Negative |
| P10820 | TATRSECKQKHKFVPGVWMA   | Negative |
| P10820 | LPRVPAPCYTATRSECKQK    | Negative |
| P10820 | CYTATRSECKQKHKFVPGVW   | Negative |
| P10820 | YTATRSECKQKHKFVPGVWM   | Negative |
| P10820 | ATCLFLLGLFLLLPRVPAP    | Negative |
| P10820 | CLFLLGLFLLLPRVPAPCY    | Negative |
| P10820 | ECKQKHKFVPGVWMAGEGMD   | Negative |
| P10820 | PRVPAPCYTATRSECKQKH    | Negative |
| P10820 | PCYTATRSECKQKHKFVPGV   | Negative |
| P10820 | TRSECKQKHKFVPGVWMAGE   | Negative |
| P10820 | LFLGLFLLLPRVPAPCYT     | Negative |
| P10820 | CKQKHKFVPGVWMAGEGMDV   | Negative |
| P10820 | PVPAPCYTATRSECKQKHKF   | Negative |
| P10820 | SECKQKHKFVPGVWMAGEGM   | Negative |
| P10820 | GLFLLLPRVPAPCYTATRS    | Negative |
| P10820 | APCYTATRSECKQKHKFVPG   | Negative |
| P10822 | TADDDLVD AEGNLVENG GTY | Negative |
| P10822 | TFLALFLLSAIISHLP SST   | Negative |
| P10822 | TFLALFLLSAIISHLP SSTA  | Negative |
| P10822 | LSAIISHLP SSTADDDL VDA | Negative |
| P10822 | KSTTFLALFLLSAIISHLP S  | Negative |
| P10822 | DAEGNLVENG GTYYLLPHIW  | Negative |
| P10822 | SHLP SSTADDDL VDAEGNLV | Negative |
| P10822 | STADDDL VDAEGNLVENG GT | Negative |
| P10822 | ADDDL VDAEGNLVENG GTYY | Negative |
| P10822 | DLVDAEGNLVENG GTYYLLP  | Negative |
| P10822 | LVDAEGNLVENG GTYYLLPH  | Negative |
| P10822 | MKSTTFLALFLLSAIISHLP   | Negative |
| P10822 | VDAEGNLVENG GTYYLLPHI  | Negative |
| P10822 | SSTADDDL VDAEGNLVENG G | Negative |
| P10822 | FLALFLLSAIISHLP SSTAD  | Negative |
| P10822 | HLP SSTADDDL VDAEGNLVE | Negative |
| P10822 | STTFLALFLLSAIISHLP SS  | Negative |

|        |                        |          |
|--------|------------------------|----------|
| P10822 | PSSTADDDLVD AEGNLVENG  | Negative |
| P10822 | AIISHLPSSTADDDLVD AEG  | Negative |
| P10822 | DDLVD AEGNLVENG GTTYLL | Negative |
| P10822 | DDDLVD AEGNLVENG GTTYL | Negative |
| P10822 | ISHLPSSTADDDLVD AEGNL  | Negative |
| P10822 | SAIISHLPSSTADDDLVD A E | Negative |
| P10822 | IISHLPSSTADDDLVD AEGN  | Negative |
| P10822 | LALFLLSAIISHLPSSTADD   | Negative |
| P10822 | LLSAIISHLPSSTADDDLVD   | Negative |
| P10822 | LFLLSAIISHLPSSTADDDL   | Negative |
| P10822 | ALFLLSAIISHLPSSTADDD   | Negative |
| P10822 | LPSSTADDDLVD AEGNLVEN  | Negative |
| P10855 | LLCTMTLCNQVFSAPYGADT   | Negative |
| P10855 | ALAVLLCTMTLCNQVFSAPY   | Negative |
| P10855 | YGADTPTACCFSYSRKIPRQ   | Negative |
| P10855 | VFSAPYGADTPTACCFSYSR   | Negative |
| P10855 | NQVFSAPYGADTPTACCFSY   | Negative |
| P10855 | MKVSTTALAVLLCTMTLCNQ   | Negative |
| P10855 | FSAPYGADTPTACCFSYSRK   | Negative |
| P10855 | TLCNQVFSAPYGADTPTACC   | Negative |
| P10855 | LCTMTLCNQVFSAPYGADTP   | Negative |
| P10855 | TALAVLLCTMTLCNQVFSAP   | Negative |
| P10855 | VLLCTMTLCNQVFSAPYGAD   | Negative |
| P10855 | ADTPTACCFSYSRKIPRQFI   | Negative |
| P10855 | QVFSAPYGADTPTACCFSYS   | Negative |
| P10855 | SAPYGADTPTACCFSYSRKI   | Negative |
| P10855 | CNQVFSAPYGADTPTACCF    | Negative |
| P10855 | CTMTLCNQVFSAPYGADTPT   | Negative |
| P10855 | DTPTACCFSYSRKIPRQFIV   | Negative |
| P10855 | VSTTALAVLLCTMTLCNQVF   | Negative |
| P10855 | APYGADTPTACCFSYSRKIP   | Negative |
| P10855 | GADTPTACCFSYSRKIPRQF   | Negative |
| P10855 | LAVLLCTMTLCNQVFSAPYG   | Negative |
| P10855 | MTLCNQVFSAPYGADTPTAC   | Negative |
| P10855 | KVSTTALAVLLCTMTLCNQV   | Negative |
| P10855 | STTALAVLLCTMTLCNQVFS   | Negative |
| P10855 | TMTLCNQVFSAPYGADTPTA   | Negative |
| P10855 | TPTACCFSYSRKIPRQFIVD   | Negative |
| P10855 | LCNQVFSAPYGADTPTACCF   | Negative |
| P10855 | TTALAVLLCTMTLCNQVFS    | Negative |
| P10855 | PYGADTPTACCFSYSRKIPR   | Negative |
| P10889 | TGAVVASELRCQCLKTLPRV   | Negative |
| P10889 | LLLLLATNHQATGAVVASEL   | Negative |
| P10889 | QATGAVVASELRCQCLKTLP   | Negative |
| P10889 | PTCRLLSAALVLLLLLATNH   | Negative |
| P10889 | ATGAVVASELRCQCLKTLPR   | Negative |

|        |                      |          |
|--------|----------------------|----------|
| P10889 | LLSAALVLLLLLATNHQATG | Negative |
| P10889 | GAVVASELRCQCLKTLPRVD | Negative |
| P10889 | VVASELRCQCLKTLPRVDFK | Negative |
| P10889 | HQATGAVVASELRCQCLKTL | Negative |
| P10889 | LLLATNHQATGAVVASELRC | Negative |
| P10889 | ALVLLLLLATNHQATGAVVA | Negative |
| P10889 | MAPPTCRLLSAALVLLLLLA | Negative |
| P10889 | AVVASELRCQCLKTLPRVDF | Negative |
| P10889 | PPTCRLLSAALVLLLLLATN | Negative |
| P10889 | NHQATGAVVASELRCQCLKT | Negative |
| P10889 | LLLLATNHQATGAVVASELR | Negative |
| P10889 | AALVLLLLLATNHQATGAVV | Negative |
| P10889 | SAALVLLLLLATNHQATGAV | Negative |
| P10889 | TNHQATGAVVASELRCQCLK | Negative |
| P10889 | VLLLLLATNHQATGAVVASE | Negative |
| P10889 | LSAALVLLLLLATNHQATGA | Negative |
| P10889 | APPTCRLLSAALVLLLLLAT | Negative |
| P10889 | RLLSAALVLLLLLATNHQAT | Negative |
| P10889 | ATNHQATGAVVASELRCQCL | Negative |
| P10889 | CRLLSAALVLLLLLATNHQA | Negative |
| P10889 | LATNHQATGAVVASELRCQC | Negative |
| P10889 | TCRLLSAALVLLLLLATNHQ | Negative |
| P10889 | LLATNHQATGAVVASELRCQ | Negative |
| P10889 | VASELRCQCLKTLPRVDFKN | Negative |
| P10909 | NELQEMSNQGSKYVNKEIQN | Negative |
| P10909 | VGLLLTWESGQVLGDQTVSD | Negative |
| P10909 | GQVLGDQTVSDNELQEMSNQ | Negative |
| P10909 | QVLGDQTVSDNELQEMSNQG | Negative |
| P10909 | LGDQTVSDNELQEMSNQGSK | Negative |
| P10909 | WESGQVLGDQTVSDNELQEM | Negative |
| P10909 | GLLLTWESGQVLGDQTVSDN | Negative |
| P10909 | LLFVGLLLTWESGQVLGDQT | Negative |
| P10909 | SDNELQEMSNQGSKYVNKEI | Negative |
| P10909 | GDQTVSDNELQEMSNQGSKY | Negative |
| P10909 | LFVGLLLTWESGQVLGDQTV | Negative |
| P10909 | DNELQEMSNQGSKYVNKEIQ | Negative |
| P10909 | VLGDQTVSDNELQEMSNQGS | Negative |
| P10909 | LLLFVGLLLTWESGQVLGDQ | Negative |
| P10909 | TWESGQVLGDQTVSDNELQE | Negative |
| P10909 | LLTWESGQVLGDQTVSDNEL | Negative |
| P10909 | DQTVSDNELQEMSNQGSKYV | Negative |
| P10909 | TVSDNELQEMSNQGSKYVNK | Negative |
| P10909 | LLLTWESGQVLGDQTVSDNE | Negative |
| P10909 | ELQEMSNQGSKYVNKEIQNA | Negative |
| P10909 | KTLLLFVGLLLTWESGQVLG | Negative |
| P10909 | LTWESGQVLGDQTVSDNELQ | Negative |



|        |                       |          |
|--------|-----------------------|----------|
| P10909 | VSDNELQEMSNQGSKYVNKE  | Negative |
| P10909 | MMKTLLLFVGLLLTWESGQV  | Negative |
| P10909 | TLLLFVGLLLTWESGQVLGD  | Negative |
| P10909 | SGQVLGDQTVSDNELQEMSN  | Negative |
| P10909 | ESGQVLGDQTVSDNELQEMS  | Negative |
| P10909 | QTVSDNELQEMSNQGSKYVN  | Negative |
| P10909 | MKTLLLFVGLLLTWESGQVL  | Negative |
| P10959 | SPPVVDTTKGKVLGKYVSLE  | Negative |
| P10959 | CPIWGHPSPPVVDTTKGKV   | Negative |
| P10959 | LCALVWASLAVCPIWGHPS   | Negative |
| P10959 | AVCPIWGHPSPPVVDTTKG   | Negative |
| P10959 | ALVWASLAVCPIWGHPSPP   | Negative |
| P10959 | GHPSSPPVVDTTKGKVLGKY  | Negative |
| P10959 | LAVCPIWGHPSPPVVDTTK   | Negative |
| P10959 | TKGKVLGKYVSLEGFTQPVA  | Negative |
| P10959 | TTKGKVLGKYVSLEGFTQPV  | Negative |
| P10959 | ASLAVCPIWGHPSPPVVD    | Negative |
| P10959 | WLCALVWASLAVCPIWGHPS  | Negative |
| P10959 | VWASLAVCPIWGHPSPPVV   | Negative |
| P10959 | DTTKGKVLGKYVSLEGFTQP  | Negative |
| P10959 | PSSPPVVDTTKGKVLGKYVS  | Negative |
| P10959 | HPSSPPVVDTTKGKVLGKYV  | Negative |
| P10959 | WGHPSPPVVDTTKGKVLGK   | Negative |
| P10959 | VVDTTKGKVLGKYVSLEGFT  | Negative |
| P10959 | PPVVDTTKGKVLGKYVSLEG  | Negative |
| P10959 | VCPIWGHPSPPVVDTTKGK   | Negative |
| P10959 | SSPPVVDTTKGKVLGKYVSL  | Negative |
| P10959 | PIWGHPSPPVVDTTKGKVL   | Negative |
| P10959 | VDTTKGKVLGKYVSLEGFTQ  | Negative |
| P10959 | IWGHPSPPVVDTTKGKVLG   | Negative |
| P10959 | PVVDTTKGKVLGKYVSLEGF  | Negative |
| P10959 | LVWASLAVCPIWGHPSPPV   | Negative |
| P10959 | KGKVLGKYVSLEGFTQPVA   | Negative |
| P10959 | WASLAVCPIWGHPSPPVVD   | Negative |
| P10959 | SLAVCPIWGHPSPPVVDTT   | Negative |
| P10959 | MWLCALVWASLAVCPIWGHPS | Negative |
| P10968 | AATAQAQRCGEQGSNMECPN  | Negative |
| P10968 | AAAVLAFAAATAQAQRCGEQ  | Negative |
| P10968 | AQAQRCGEQGSNMECPNNLC  | Negative |
| P10968 | TRALALGAAVLAFAAATAQ   | Negative |
| P10968 | AAVLAFAAATAQAQRCGEQG  | Negative |
| P10968 | QRCGEQGSNMECPNNLCCSQ  | Negative |
| P10968 | LGAAVLAFAAATAQAQRCG   | Negative |
| P10968 | GEQGSNMECPNNLCCSQYGY  | Negative |
| P10968 | CGEQGSNMECPNNLCCSQYG  | Negative |
| P10968 | ATAQAQRCGEQGSNMECPNN  | Negative |

|        |                       |          |
|--------|-----------------------|----------|
| P10968 | AAATAQAQRCGEQGSNMECP  | Negative |
| P10968 | VLAFAAAATAQAQRCGEQGSN | Negative |
| P10968 | AFAAATAQAQRCGEQGSNME  | Negative |
| P10968 | RALALGAAAVLAFAAAATAQA | Negative |
| P10968 | LALGAAAVLAFAAAATAQAQR | Negative |
| P10968 | MMSTRALALGAAAVLAFAAA  | Negative |
| P10968 | RCGEQGSNMECPNNLCCSQY  | Negative |
| P10968 | MKMMSTRALALGAAAVLAFA  | Negative |
| P10968 | STRALALGAAAVLAFAAATA  | Negative |
| P10968 | LAFAAATAQAQRCGEQGSNM  | Negative |
| P10968 | ALGAAAVLAFAAATAQAQRC  | Negative |
| P10968 | TAQAQRCGEQGSNMECPNNL  | Negative |
| P10968 | ALALGAAAVLAFAAATAQAQ  | Negative |
| P10968 | AQRCGEQGSNMECPNNLCCS  | Negative |
| P10968 | KMMSTRALALGAAAVLAFAA  | Negative |
| P10968 | FAAATAQAQRCGEQGSNMEC  | Negative |
| P10968 | QAQRCGEQGSNMECPNNLCC  | Negative |
| P10968 | MSTRALALGAAAVLAFAAAT  | Negative |
| P10968 | AVLAFAAATAQAQRCGEQGS  | Negative |
| P10975 | VLLLLSFLFCLANTNEAAVP  | Negative |
| P10975 | LFCLANTNEAAVPCSTVDMK  | Negative |
| P10975 | FCLANTNEAAVPCSTVDMKA  | Negative |
| P10975 | LLSFLFCLANTNEAAVPCST  | Negative |
| P10975 | TVDMKAAACVGFATGKDSKP  | Negative |
| P10975 | LSFLFCLANTNEAAVPCSTV  | Negative |
| P10975 | SVLLLLSFLFCLANTNEAAV  | Negative |
| P10975 | ANTNEAAVPCSTVDMKAAAC  | Negative |
| P10975 | VFSVLLLLSFLFCLANTNEA  | Negative |
| P10975 | TNEAAVPCSTVDMKAAACVG  | Negative |
| P10975 | AAVPCSTVDMKAAACVGFAT  | Negative |
| P10975 | FLFCLANTNEAAVPCSTVDM  | Negative |
| P10975 | CSTVDMKAAACVGFATGKDS  | Negative |
| P10975 | EAAVPCSTVDMKAAACVGFA  | Negative |
| P10975 | NTNEAAVPCSTVDMKAAACV  | Negative |
| P10975 | AVPCSTVDMKAAACVGFATG  | Negative |
| P10975 | PCSTVDMKAAACVGFATGKD  | Negative |
| P10975 | SFLFCLANTNEAAVPCSTVD  | Negative |
| P10975 | FSVLLLLSFLFCLANTNEAA  | Negative |
| P10975 | VPCSTVDMKAAACVGFATGK  | Negative |
| P10975 | KNVVFSVLLLLSFLFCLANT  | Negative |
| P10975 | MKNVVFSVLLLLSFLFCLAN  | Negative |
| P10975 | STVDMKAAACVGFATGKDSK  | Negative |
| P10975 | VVFSVLLLLSFLFCLANTNE  | Negative |
| P10975 | NEAAVPCSTVDMKAAACVGF  | Negative |
| P10975 | LLLLSFLFCLANTNEAAVPC  | Negative |
| P10975 | CLANTNEAAVPCSTVDMKAA  | Negative |

|        |                       |          |
|--------|-----------------------|----------|
| P10975 | LANTNEAAVPCSTVDMKAAA  | Negative |
| P10975 | NVVFSVLLLLSFLFCLANTN  | Negative |
| P10976 | IKLACAVLLCIVVAAPYAEA  | Negative |
| P10976 | VIKLACAVLLCIVVAAPYAE  | Negative |
| P10976 | ASSAVIKLACAVLLCIVVAA  | Negative |
| P10976 | AVIKLACAVLLCIVVAAPYA  | Negative |
| P10976 | EAGITCGMVSSKLAPCIGYL  | Negative |
| P10976 | ITCGMVSSKLAPCIGYLGKG  | Negative |
| P10976 | AAPYAEAGITCGMVSSKLAP  | Negative |
| P10976 | AGITCGMVSSKLAPCIGYLG  | Negative |
| P10976 | CGMVSSKLAPCIGYLGKGPL  | Negative |
| P10976 | SAVIKLACAVLLCIVVAAPY  | Negative |
| P10976 | LLCIVVAAPYAEAGITCGMV  | Negative |
| P10976 | AEAGITCGMVSSKLAPCIGY  | Negative |
| P10976 | IVVAAPYAEAGITCGMVSSK  | Negative |
| P10976 | SSAVIKLACAVLLCIVVAAP  | Negative |
| P10976 | LCIVVAAPYAEAGITCGMVS  | Negative |
| P10976 | GITCGMVSSKLAPCIGYLGK  | Negative |
| P10976 | ACAVLLCIVVAAPYAEAGIT  | Negative |
| P10976 | YAEAGITCGMVSSKLAPCIG  | Negative |
| P10976 | CAVLLCIVVAAPYAEAGITC  | Negative |
| P10976 | MASSAVIKLACAVLLCIVVA  | Negative |
| P10976 | VLLCIVVAAPYAEAGITCGM  | Negative |
| P10976 | CIVVAAPYAEAGITCGMVSS  | Negative |
| P10976 | APYAEAGITCGMVSSKLAPC  | Negative |
| P10976 | VAAPYAEAGITCGMVSSKLA  | Negative |
| P10976 | LACAVLLCIVVAAPYAEAGI  | Negative |
| P10976 | VVAAPYAEAGITCGMVSSKL  | Negative |
| P10976 | PYAEAGITCGMVSSKLAPCI  | Negative |
| P10976 | KLACAVLLCIVVAAPYAEAG  | Negative |
| P10976 | TCGMVSSKLAPCIGYLGKGP  | Negative |
| P11021 | LVAAML LLLSAARAEEDKK  | Negative |
| P11021 | DVGTVVGIDLGTTYSCVGVF  | Negative |
| P11021 | LLLSAARAEEDKKEDVGT    | Negative |
| P11021 | LSLVAAML LLLSAARAEED  | Negative |
| P11021 | ARAEEDKKEDVGT VVGIDL  | Negative |
| P11021 | KEDVGT VVGIDLGTTYSCVG | Negative |
| P11021 | GTVVGIDLGTTYSCVGVFKN  | Negative |
| P11021 | EEDKKEDVGT VVGIDLGTTY | Negative |
| P11021 | VVGIDLGTTYSCVGVFKNGR  | Negative |
| P11021 | LLLSAARAEEDKKEDVGTV   | Negative |
| P11021 | KLSLVAAML LLLSAARAEED | Negative |
| P11021 | LSAARAEEDKKEDVGT VVG  | Negative |
| P11021 | AML LLLSAARAEEDKKEDV  | Negative |
| P11021 | AAML LLLSAARAEEDKKED  | Negative |
| P11021 | DKKEDVGT VVGIDLGTTYSC | Negative |

|        |                      |          |
|--------|----------------------|----------|
| P11021 | AEEEDKKEDVGTVVGIDLGT | Negative |
| P11021 | VGTVVGIDLGTTYSCVGVFK | Negative |
| P11021 | VAAMLLLLSAARAEEDKKE  | Negative |
| P11021 | MKLSLVAAMLLLLSAARAE  | Negative |
| P11021 | SAARAEEDKKEDVGTVVGI  | Negative |
| P11021 | RAEEEDKKEDVGTVVGIDLG | Negative |
| P11021 | KKEDVGTVVGIDLGTTYSCV | Negative |
| P11021 | EDKKEDVGTVVGIDLGTTYS | Negative |
| P11021 | EEEDKKEDVGTVVGIDLGTT | Negative |
| P11021 | EDVGTVVGIDLGTTYSCVGV | Negative |
| P11021 | MLLLLSAARAEEDKKEDVG  | Negative |
| P11021 | LLSAARAEEDKKEDVGTVV  | Negative |
| P11021 | AARAEEDKKEDVGTVVGID  | Negative |
| P11021 | TVVGIDLGTTYSCVGVFKNG | Negative |
| P11069 | MLRQLLVLVGLAVVCLADEH | Negative |
| P11069 | LVGLAVVCLADEHEHCCSEE | Negative |
| P11069 | VGLAVVCLADEHEHCCSEED | Negative |
| P11069 | HRIVQKQWDILWRDTESSKI | Negative |
| P11069 | SEEDHRIVQKQWDILWRDTE | Negative |
| P11069 | VCLADEHEHCCSEEDHRIVQ | Negative |
| P11069 | EEDHRIVQKQWDILWRDTE  | Negative |
| P11069 | LRQLLVLVGLAVVCLADEHE | Negative |
| P11069 | DHRIVQKQWDILWRDTESSK | Negative |
| P11069 | EHEHCCSEEDHRIVQKQWDI | Negative |
| P11069 | ADEHEHCCSEEDHRIVQKQW | Negative |
| P11069 | CCSEEDHRIVQKQWDILWRD | Negative |
| P11069 | VVCLADEHEHCCSEEDHRIV | Negative |
| P11069 | QLLVLVGLAVVCLADEHEHC | Negative |
| P11069 | EDHRIVQKQWDILWRDTESS | Negative |
| P11069 | HEHCCSEEDHRIVQKQWDIL | Negative |
| P11069 | LVLVGLAVVCLADEHEHCCS | Negative |
| P11069 | VLVGLAVVCLADEHEHCCSE | Negative |
| P11069 | RIVQKQWDILWRDTESSKIK | Negative |
| P11069 | CSEEDHRIVQKQWDILWRDT | Negative |
| P11069 | LLVLVGLAVVCLADEHEHCC | Negative |
| P11069 | HCCSEEDHRIVQKQWDILWR | Negative |
| P11069 | AVVCLADEHEHCCSEEDHRI | Negative |
| P11069 | DEHEHCCSEEDHRIVQKQWD | Negative |
| P11069 | LAVVCLADEHEHCCSEEDHR | Negative |
| P11069 | CLADEHEHCCSEEDHRIVQK | Negative |
| P11069 | EHCCSEEDHRIVQKQWDILW | Negative |
| P11069 | GLAVVCLADEHEHCCSEEDH | Negative |
| P11069 | LADEHEHCCSEEDHRIVQKQ | Negative |
| P11151 | LSVCLQSLTVSRGGLVAADR | Negative |
| P11151 | KALLLLALSVCLQSLTVSRG | Negative |
| P11151 | MESKALLLLALSVCLQSLTV | Negative |

|        |                       |          |
|--------|-----------------------|----------|
| P11151 | ESKALLLLALSVCLQSLTVS  | Negative |
| P11151 | LTVSRGGLVAADRITGGKDF  | Negative |
| P11151 | VSRGGLVAADRITGGKDFRD  | Negative |
| P11151 | VCLQSLTVSRGGLVAADRIT  | Negative |
| P11151 | TVSRGGLVAADRITGGKDFR  | Negative |
| P11151 | LQSLTVSRGGLVAADRITGG  | Negative |
| P11151 | LLLALSVCLQSLTVSRGGL   | Negative |
| P11151 | LVAADRITGGKDFRDIESKF  | Negative |
| P11151 | LLALSVCLQSLTVSRGGLVA  | Negative |
| P11151 | ALLLLALSVCLQSLTVSRGG  | Negative |
| P11151 | LALSVCLQSLTVSRGGLVAA  | Negative |
| P11151 | RGGLVAADRITGGKDFRDIE  | Negative |
| P11151 | SRGGLVAADRITGGKDFRDI  | Negative |
| P11151 | GLVAADRITGGKDFRDIESK  | Negative |
| P11151 | GGLVAADRITGGKDFRDIES  | Negative |
| P11151 | ADRITGGKDFRDIESKFALR  | Negative |
| P11151 | SLTVSRGGLVAADRITGGKD  | Negative |
| P11151 | ALSVCLQSLTVSRGGLVAAD  | Negative |
| P11151 | DRITGGKDFRDIESKFALRT  | Negative |
| P11151 | SKALLLLALSVCLQSLTVSR  | Negative |
| P11151 | RITGGKDFRDIESKFALRTP  | Negative |
| P11151 | VAAADRITGGKDFRDIESKFA | Negative |
| P11151 | LLLALSVCLQSLTVSRGGLV  | Negative |
| P11151 | SVCLQSLTVSRGGLVAADRI  | Negative |
| P11151 | QSLTVSRGGLVAADRITGGK  | Negative |
| P11151 | AADRITGGKDFRDIESKFAL  | Negative |
| P11218 | QRCGSQGGGGTCPALWCCSI  | Negative |
| P11218 | GGGGTCPALWCCSIWGWCGD  | Negative |
| P11218 | SAMAVGLVSAQRCGSQGGGG  | Negative |
| P11218 | IMSSAMAVGLVSAQRCGSQG  | Negative |
| P11218 | LSAVVIMSSAMAVGLVSAQR  | Negative |
| P11218 | GSQGGGGTCPALWCCSIWGW  | Negative |
| P11218 | SAVVIMSSAMAVGLVSAQRC  | Negative |
| P11218 | MAVGLVSAQRCGSQGGGGTC  | Negative |
| P11218 | MRFLSAVVIMSSAMAVGLVS  | Negative |
| P11218 | FLSAVVIMSSAMAVGLVSAQ  | Negative |
| P11218 | VGLVSAQRCGSQGGGGTCPA  | Negative |
| P11218 | CGSQGGGGTCPALWCCSIWG  | Negative |
| P11218 | SQGGGGTCPALWCCSIWGC   | Negative |
| P11218 | VSAQRCGSQGGGGTCPALWC  | Negative |
| P11218 | MMRFLSAVVIMSSAMAVGLV  | Negative |
| P11218 | SAQRCGSQGGGGTCPALWCC  | Negative |
| P11218 | VIMSSAMAVGLVSAQRCGSQ  | Negative |
| P11218 | LVSAQRCGSQGGGGTCPALW  | Negative |
| P11218 | MMMRFLSAVVIMSSAMAVGL  | Negative |
| P11218 | MSSAMAVGLVSAQRCGSQGG  | Negative |

|        |                       |          |
|--------|-----------------------|----------|
| P11218 | SSAMAVGLVSAQRCGSQGGG  | Negative |
| P11218 | AQRCGSQGGGGTCTPALWCCS | Negative |
| P11218 | RFLSAVVIMSSAMAVGLVSA  | Negative |
| P11218 | AVVIMSSAMAVGLVSAQRCG  | Negative |
| P11218 | RCGSQGGGGTCTPALWCCSIW | Negative |
| P11218 | GLVSAQRCGSQGGGGTCTPAL | Negative |
| P11218 | QGGGGTCTPALWCCSIWGWCG | Negative |
| P11218 | AVGLVSAQRCGSQGGGGTCTP | Negative |
| P11218 | AMAVGLVSAQRCGSQGGGGT  | Negative |
| P11220 | PAQAATSATATFQKTSWGT   | Negative |
| P11220 | PLAGLVGLASPAQAATSATA  | Negative |
| P11220 | LASPAQAATSATATFQKTS   | Negative |
| P11220 | LAATLALPLAGLVGLASPAQ  | Negative |
| P11220 | FRHKAAALATLALPLAGLV   | Negative |
| P11220 | AALATLALPLAGLVGLASP   | Negative |
| P11220 | KAAALATLALPLAGLVGLA   | Negative |
| P11220 | ALATLALPLAGLVGLASPA   | Negative |
| P11220 | TLALPLAGLVGLASPAQAAT  | Negative |
| P11220 | ALPLAGLVGLASPAQAATSA  | Negative |
| P11220 | MRFRHKAAALATLALPLAG   | Negative |
| P11220 | SPAQAATSATATFQKTSW    | Negative |
| P11220 | AAALATLALPLAGLVGLAS   | Negative |
| P11220 | VGLASPAQAATSATATFQKT  | Negative |
| P11220 | ASPAQAATSATATFQKTSW   | Negative |
| P11220 | HKAAALATLALPLAGLVGL   | Negative |
| P11220 | RFRHKAAALATLALPLAGL   | Negative |
| P11220 | LALPLAGLVGLASPAQAATS  | Negative |
| P11220 | ATLALPLAGLVGLASPAQAA  | Negative |
| P11220 | LVGLASPAQAATSATATFQK  | Negative |
| P11220 | LAGLVGLASPAQAATSATAT  | Negative |
| P11220 | AGLVGLASPAQAATSATATF  | Negative |
| P11220 | AATLALPLAGLVGLASPAQA  | Negative |
| P11220 | AQAATSATATFQKTSWGTG   | Negative |
| P11220 | AATSATATFQKTSWGTGFG   | Negative |
| P11220 | GLASPAQAATSATATFQKTS  | Negative |
| P11220 | GLVGLASPAQAATSATATFQ  | Negative |
| P11220 | RHKAAALATLALPLAGLVG   | Negative |
| P11220 | QAATSATATFQKTSWGTGF   | Negative |
| P11226 | ASYSETVTCEDAQKTCPAVI  | Negative |
| P11226 | LSMVAASYSETVTCEDAQKT  | Negative |
| P11226 | MVAASYSETVTCEDAQKTC   | Negative |
| P11226 | VTCEDAQKTCPAVIACSSPG  | Negative |
| P11226 | SLFPSLPLLLSMVAASYSE   | Negative |
| P11226 | PSLPLLLSMVAASYSETVT   | Negative |
| P11226 | ETVTCEDAQKTCPAVIACSS  | Negative |
| P11226 | SMVAASYSETVTCEDAQKTC  | Negative |

|        |                       |          |
|--------|-----------------------|----------|
| P11226 | LLLLSMVAASYSETVTCEDA  | Negative |
| P11226 | LLLLSMVAASYSETVTCEDAQ | Negative |
| P11226 | VAASYSETVTCEDAQKTCPA  | Negative |
| P11226 | LLSMVAASYSETVTCEDAQK  | Negative |
| P11226 | KTCPAVIACSSPGINGFPGK  | Negative |
| P11226 | YSETVTCEDAQKTCPAVIAC  | Negative |
| P11226 | AQKTCPAVIACSSPGINGFP  | Negative |
| P11226 | AASYSETVTCEDAQKTCPAV  | Negative |
| P11226 | LFPSLPLLLLSMVAASYSET  | Negative |
| P11226 | DAQKTCPAVIACSSPGINGF  | Negative |
| P11226 | CEDAQKTCPAVIACSSPGIN  | Negative |
| P11226 | PLLLLSMVAASYSETVTCED  | Negative |
| P11226 | QKTCPAVIACSSPGINGFPG  | Negative |
| P11226 | FPSLPLLLLSMVAASYSETV  | Negative |
| P11226 | SYSETVTCEDAQKTCPAVIA  | Negative |
| P11226 | EDAQKTCPAVIACSSPGING  | Negative |
| P11226 | TVTCEDAQKTCPAVIACSSP  | Negative |
| P11226 | LPLLLLSMVAASYSETVTCE  | Negative |
| P11226 | TCEDAQKTCPAVIACSSPGI  | Negative |
| P11226 | MSLFPSLPLLLLSMVAASYS  | Negative |
| P11226 | SETVTCEDAQKTCPAVIACS  | Negative |
| P11439 | IPLVASLGLLAGGSFASAAE  | Negative |
| P11439 | LLAGGSFASAAEEAFDLWNE  | Negative |
| P11439 | SLGLLAGGSFASAAEEAFDL  | Negative |
| P11439 | HWIPLVASLGLLAGGSFASA  | Negative |
| P11439 | LAGGSFASAAEEAFDLWNEC  | Negative |
| P11439 | TPHWIPLVASLGLLAGGSFA  | Negative |
| P11439 | AFDLWNECAKACVLDLKDGV  | Negative |
| P11439 | ASAAEEAFDLWNECAKACVL  | Negative |
| P11439 | PLVASLGLLAGGSFASAAEE  | Negative |
| P11439 | HLTPHWIPLVASLGLLAGGS  | Negative |
| P11439 | ASLGLLAGGSFASAAEEAFD  | Negative |
| P11439 | SFASAAEEAFDLWNECAKAC  | Negative |
| P11439 | WIPLVASLGLLAGGSFASAA  | Negative |
| P11439 | GGSFASAAEEAFDLWNECAK  | Negative |
| P11439 | FASAAEEAFDLWNECAKACV  | Negative |
| P11439 | EAFDLWNECAKACVLDLKD   | Negative |
| P11439 | PHWIPLVASLGLLAGGSFAS  | Negative |
| P11439 | MHLTPHWIPLVASLGLLAGG  | Negative |
| P11439 | GLLAGGSFASAAEEAFDLWN  | Negative |
| P11439 | EEAFDLWNECAKACVLDLKD  | Negative |
| P11439 | SAAEEAFDLWNECAKACVLD  | Negative |
| P11439 | AGGSFASAAEEAFDLWNECA  | Negative |
| P11439 | LGLLAGGSFASAAEEAFDLW  | Negative |
| P11439 | AEEAFDLWNECAKACVLDLK  | Negative |
| P11439 | LVASLGLLAGGSFASAAEEA  | Negative |

|        |                       |          |
|--------|-----------------------|----------|
| P11439 | FDLWNECAKACVLDLKDGV   | Negative |
| P11439 | LTPHWIPLVASLGLLAGGSF  | Negative |
| P11439 | AAEEAFDLWNECAKACVLDL  | Negative |
| P11439 | GSFASAAEEAFDLWNECAKA  | Negative |
| P11472 | GVLTAACSSGPTAADLGTLTY | Negative |
| P11472 | AVCLGVLTACSSGPTAADLG  | Negative |
| P11472 | LGTLYTDQIKDTGLANKCLS  | Negative |
| P11472 | DLGTLYTDQIKDTGLANKCL  | Negative |
| P11472 | SSGPTAADLGTLTYDQIKDT  | Negative |
| P11472 | AFLAAFLAVCLGVLTACSSG  | Negative |
| P11472 | GPTAADLGTLTYDQIKDTGL  | Negative |
| P11472 | AAFLAVCLGVLTACSSGPTA  | Negative |
| P11472 | MRYRAFLAAFLAVCLGVLT   | Negative |
| P11472 | AFLAVCLGVLTACSSGPTAA  | Negative |
| P11472 | LAAFLAVCLGVLTACSSGPT  | Negative |
| P11472 | CLGVLTACSSGPTAADLGTL  | Negative |
| P11472 | ADLGTLTYDQIKDTGLANKC  | Negative |
| P11472 | YRAFLAAFLAVCLGVLTACS  | Negative |
| P11472 | AADLGTLTYDQIKDTGLANK  | Negative |
| P11472 | LGVLTACSSGPTAADLGTLT  | Negative |
| P11472 | TACSSGPTAADLGTLTYDQI  | Negative |
| P11472 | FLAAFLAVCLGVLTACSSGP  | Negative |
| P11472 | VLTAACSSGPTAADLGTLTYD | Negative |
| P11472 | PTAADLGTLTYDQIKDTGLA  | Negative |
| P11472 | ACSSGPTAADLGTLTYDQIK  | Negative |
| P11472 | LAVCLGVLTACSSGPTAADL  | Negative |
| P11472 | CSSGPTAADLGTLTYDQIKD  | Negative |
| P11472 | FLAVCLGVLTACSSGPTAAD  | Negative |
| P11472 | TAADLGTLTYDQIKDTGLAN  | Negative |
| P11472 | LTACSSGPTAADLGTLTYDQ  | Negative |
| P11472 | SGPTAADLGTLTYDQIKDTG  | Negative |
| P11472 | RYRAFLAAFLAVCLGVLTAC  | Negative |
| P11472 | RAFLAAFLAVCLGVLTACSS  | Negative |
| P11590 | ATSKGQNLNVEKINGEWSI   | Negative |
| P11590 | QNLNVEKINGEWSILLASD   | Negative |
| P11590 | LLLCLGLTLVCIHAEATSK   | Negative |
| P11590 | LTLCIHAEEATSKGQNLNV   | Negative |
| P11590 | TLVCIHAEEATSKGQNLNVE  | Negative |
| P11590 | LCIHAEEATSKGQNLNVEK   | Negative |
| P11590 | CIHAEEATSKGQNLNVEKIN  | Negative |
| P11590 | LCLGLTLVCIHAEEATSKGQ  | Negative |
| P11590 | LNVEKINGEWSILLASDKR   | Negative |
| P11590 | GQNLNVEKINGEWSILLAS   | Negative |
| P11590 | GLTLVCIHAEEATSKGQNLN  | Negative |
| P11590 | KGQNLNVEKINGEWSILLA   | Negative |
| P11590 | IHAEEATSKGQNLNVEKING  | Negative |



|        |                        |          |
|--------|------------------------|----------|
| P11590 | TSKGQNLNVEKINGEWF      | Negative |
| P11590 | EEATSKGQNLNVEKINGEWF   | Negative |
| P11590 | MKLLLCLGLTLVCIHAEAT    | Negative |
| P11590 | NLNVEKINGEWF           | Negative |
| P11590 | HAEEATSKGQNLNVEKINGE   | Negative |
| P11590 | LGLTLVCIHAEATSKGQNL    | Negative |
| P11590 | VCIHAEATSKGQNLNVEKI    | Negative |
| P11590 | KINGEWF                | Negative |
| P11590 | CLGLTLVCIHAEATSKGQNL   | Negative |
| P11590 | LLCLGLTLVCIHAEATSKG    | Negative |
| P11590 | EATSKGQNLNVEKINGEWF    | Negative |
| P11590 | VEKINGEWF              | Negative |
| P11590 | EKINGEWF               | Negative |
| P11590 | SKGQNLNVEKINGEWF       | Negative |
| P11590 | NVEKINGEWF             | Negative |
| P11590 | AEEATSKGQNLNVEKINGEWF  | Negative |
| P11598 | SDVLELTDENFESRVSDTGS   | Negative |
| P11598 | ASASDVLELTDENFESRVSD   | Negative |
| P11598 | LASALLASASDVLELTDENF   | Negative |
| P11598 | ASALLASASDVLELTDENFE   | Negative |
| P11598 | LALLPGVALLLASALLASAS   | Negative |
| P11598 | LLASALLASASDVLELTDEN   | Negative |
| P11598 | LPGVALLLASALLASASDV    | Negative |
| P11598 | LLASASDVLELTDENFESRV   | Negative |
| P11598 | LLASALLASASDVLELTDE    | Negative |
| P11598 | ALLPGVALLLASALLASASD   | Negative |
| P11598 | LLPGVALLLASALLASASDV   | Negative |
| P11598 | ELTDENFESRVSDTGSAGLM   | Negative |
| P11598 | VLELTDENFESRVSDTGSAG   | Negative |
| P11598 | SALLASASDVLELTDENFES   | Negative |
| P11598 | FSCALLPGVALLLASALLA    | Negative |
| P11598 | ALLASALLASASDVLELTD    | Negative |
| P11598 | LTDENFESRVSDTGSAGML    | Negative |
| P11598 | DVLELTDENFESRVSDTGSA   | Negative |
| P11598 | SASDVLELTDENFESRVSDT   | Negative |
| P11598 | LELTDENFESRVSDTGSAGL   | Negative |
| P11598 | GVALLASALLASASDVLEL    | Negative |
| P11598 | RFSCALLPGVALLLASALL    | Negative |
| P11598 | LASASDVLELTDENFESRV    | Negative |
| P11598 | ALLASASDVLELTDENFESR   | Negative |
| P11598 | CLALLPGVALLLASALLASA   | Negative |
| P11598 | VALLASALLASASDVLELT    | Negative |
| P11598 | SCLALLPGVALLLASALLAS   | Negative |
| P11598 | MRFSCALLPGVALLLASAL    | Negative |
| P11598 | ASDVLELTDENFESRVSDTG   | Negative |
| P11643 | TVMVSVFAAAAAAAAAAATDCS | Negative |

|        |                        |          |
|--------|------------------------|----------|
| P11643 | ATVMVSVFAAAAAAAAAAATDC | Negative |
| P11643 | LATVMVSVFAAAAAAAAAAATD | Negative |
| P11643 | MVSVFAAAAAAAAAAATDCSPG | Negative |
| P11643 | SVFAAAAAAAAAAATDCSPGVA | Negative |
| P11643 | ATDCSPGVAFPTNLLGHCRD   | Negative |
| P11643 | LLLLATVMVSVFAAAAAAAAA  | Negative |
| P11643 | TDCSPGVAFPTNLLGHCRDY   | Negative |
| P11643 | AAAAAAAAAATDCSPGVAFPT  | Negative |
| P11643 | AAAAAAAAAATDCSPGVAFPTN | Negative |
| P11643 | ACKSSRSLLLLATVMVSVFA   | Negative |
| P11643 | SSRSLLLLATVMVSVFAAAA   | Negative |
| P11643 | AAAAAATDCSPGVAFPTNLL   | Negative |
| P11643 | VFAAAAAAAAAAATDCSPGVAF | Negative |
| P11643 | SLLLLATVMVSVFAAAAAAAAA | Negative |
| P11643 | AAAAAAATDCSPGVAFPTNL   | Negative |
| P11643 | AAAAATDCSPGVAFPTNLLG   | Negative |
| P11643 | FAAAAAAAAAAATDCSPGVAFP | Negative |
| P11643 | AATDCSPGVAFPTNLLGHCR   | Negative |
| P11643 | VSVFAAAAAAAAAAATDCSPGV | Negative |
| P11643 | AAAATDCSPGVAFPTNLLGH   | Negative |
| P11643 | CKSSRSLLLLATVMVSVFAA   | Negative |
| P11643 | MACKSSRSLLLLATVMVSVF   | Negative |
| P11643 | VMVSVFAAAAAAAAAAATDCSP | Negative |
| P11643 | AAATDCSPGVAFPTNLLGHC   | Negative |
| P11643 | LLATVMVSVFAAAAAAAAAAAT | Negative |
| P11643 | KSSRSLLLLATVMVSVFAAA   | Negative |
| P11643 | RSLLLLATVMVSVFAAAAAA   | Negative |
| P11643 | SRSLLLLATVMVSVFAAAAA   | Negative |
| P11657 | GFRKSKISKTLCGAVLGTVA   | Negative |
| P11657 | RKSKISKTLCGAVLGTVA AV  | Negative |
| P11657 | VAAVSVAGQKVFADETTTTS   | Negative |
| P11657 | VSVAGQKVFADETTTTS DVD  | Negative |
| P11657 | LGTVA AVSVAGQKVFADETT  | Negative |
| P11657 | KVKKTYGFRKSKISKTLCGA   | Negative |
| P11657 | SVAGQKVFADETTTTS DVD   | Negative |
| P11657 | TVA AVSVAGQKVFADETTT   | Negative |
| P11657 | KKTYGFRKSKISKTLCGAVL   | Negative |
| P11657 | AVLGTVA AVSVAGQKVFADE  | Negative |
| P11657 | AAVSVAGQKVFADETTTSD    | Negative |
| P11657 | KTYGFRKSKISKTLCGAVLG   | Negative |
| P11657 | SKTLCGAVLGTVA AVSVAGQ  | Negative |
| P11657 | AVSVAGQKVFADETTTSDV    | Negative |
| P11657 | GAVLGTVA AVSVAGQKVFADE | Negative |
| P11657 | MKVKKTYGFRKSKISKTLCG   | Negative |
| P11657 | VLGTVA AVSVAGQKVFADET  | Negative |
| P11657 | TLCGAVLGTVA AVSVAGQKV  | Negative |

|        |                       |          |
|--------|-----------------------|----------|
| P11657 | VKKTYGFRKSKISKTLCGAV  | Negative |
| P11657 | SKISKTLCGAVLGTVA AVSV | Negative |
| P11657 | CGAVLGTVA AVSVAGQKVFA | Negative |
| P11657 | KISKTLCGAVLGTVA AVSVA | Negative |
| P11657 | FRKSKISKTLCGAVLGTVAA  | Negative |
| P11657 | KTLCGAVLGTVA AVSVAGQK | Negative |
| P11657 | YGFRKSKISKTLCGAVLGTV  | Negative |
| P11657 | ISKTLCGAVLGTVA AVSVAG | Negative |
| P11657 | LCGAVLGTVA AVSVAGQKVF | Negative |
| P11657 | TYGFRKSKISKTLCGAVLGT  | Negative |
| P11657 | KSKISKTLCGAVLGTVA AVS | Negative |
| P11684 | TLTLVTLALCCSSASAEICP  | Negative |
| P11684 | LALCCSSASAEICPSFQRVI  | Negative |
| P11684 | KLAVTLTLVTLALCCSSASA  | Negative |
| P11684 | CSSASAEICPSFQRIETLL   | Negative |
| P11684 | VIETLLMDTPSSYEAAMELF  | Negative |
| P11684 | SSASAEICPSFQRIETLLM   | Negative |
| P11684 | RVIETLLMDTPSSYEAAMEL  | Negative |
| P11684 | LVTLALCCSSASAEICPSFQ  | Negative |
| P11684 | FQRIETLLMDTPSSYEAAM   | Negative |
| P11684 | SAEICPSFQRIETLLMDTP   | Negative |
| P11684 | LCCSSASAEICPSFQRIET   | Negative |
| P11684 | LAVTLTLVTLALCCSSASAE  | Negative |
| P11684 | ICPSFQRIETLLMDTPSSY   | Negative |
| P11684 | TLALCCSSASAEICPSFQRV  | Negative |
| P11684 | VTLTLVTLALCCSSASAEIC  | Negative |
| P11684 | SFQRIETLLMDTPSSYEA    | Negative |
| P11684 | SASAEICPSFQRIETLLMD   | Negative |
| P11684 | PSFQRIETLLMDTPSSYEA   | Negative |
| P11684 | CPSFQRIETLLMDTPSSYE   | Negative |
| P11684 | MKLAVTLTLVTLALCCSSAS  | Negative |
| P11684 | CCSSASAEICPSFQRIETL   | Negative |
| P11684 | QRIETLLMDTPSSYEAAME   | Negative |
| P11684 | ASAEICPSFQRIETLLMDT   | Negative |
| P11684 | VTLALCCSSASAEICPSFQR  | Negative |
| P11684 | EICPSFQRIETLLMDTPSS   | Negative |
| P11684 | ALCCSSASAEICPSFQRIE   | Negative |
| P11684 | AEICPSFQRIETLLMDTPS   | Negative |
| P11684 | AVTLTLVTLALCCSSASAEI  | Negative |
| P11684 | TLVTLALCCSSASAEICPSF  | Negative |
| P11889 | GLGALYSGTSAQAEASTNQ   | Negative |
| P11889 | SLGVGLGALYSGTSAQAEAS  | Negative |
| P11889 | LSLGVGLGALYSGTSAQAEA  | Negative |
| P11889 | LGVGLGALYSGTSAQAEAST  | Negative |
| P11889 | LKGVLSLGVGLGALYSGTSA  | Negative |
| P11889 | LYSGTSAQAEASTNQNDTLK  | Negative |

|        |                       |          |
|--------|-----------------------|----------|
| P11889 | SAQAEASTNQNDTLKVMTHN  | Negative |
| P11889 | KGVLSLGVGLGALYSGTSAQ  | Negative |
| P11889 | AEASTNQNDTLKVMTHNVYM  | Negative |
| P11889 | KGKLLKGVLSLGVGLGALYS  | Negative |
| P11889 | STNQNDTLKVMTHNVYMLST  | Negative |
| P11889 | ALYSGTSAQAEASTNQNDTL  | Negative |
| P11889 | VGLGALYSGTSAQAEASTNQ  | Negative |
| P11889 | VLSLGVGLGALYSGTSAQAE  | Negative |
| P11889 | LLKGVLSLGVGLGALYSGTS  | Negative |
| P11889 | SGTSAQAEASTNQNDTLKVM  | Negative |
| P11889 | MKGKLLKGVLSLGVGLGALY  | Negative |
| P11889 | GVLSLGVGLGALYSGTSAQA  | Negative |
| P11889 | GKLLKGVLSLGVGLGALYSG  | Negative |
| P11889 | LGALYSGTSAQAEASTNQND  | Negative |
| P11889 | QAEASTNQNDTLKVMTHNVY  | Negative |
| P11889 | GTSAQAEASTNQNDTLKVMT  | Negative |
| P11889 | EASTNQNDTLKVMTHNVYML  | Negative |
| P11889 | TSAQAEASTNQNDTLKVMTH  | Negative |
| P11889 | YSGTSAQAEASTNQNDTLKV  | Negative |
| P11889 | GALYSGTSAQAEASTNQNDT  | Negative |
| P11889 | ASTNQNDTLKVMTHNVYMLS  | Negative |
| P11889 | KLLKGVLSLGVGLGALYSGT  | Negative |
| P11889 | AQAEASTNQNDTLKVMTHNV  | Negative |
| P11916 | AKSLLL VFGILLGLSHLSLS | Negative |
| P11916 | ILLGLSHLSLSQNWATFQQK  | Negative |
| P11916 | CAKSLLL VFGILLGLSHLSL | Negative |
| P11916 | QQKHIINTPIINCNTIMDNN  | Negative |
| P11916 | LSLSQNWATFQQKHIINTPI  | Negative |
| P11916 | NWATFQQKHIINTPIINCNT  | Negative |
| P11916 | WATFQQKHIINTPIINCNTI  | Negative |
| P11916 | LSQNWATFQQKHIINTPIIN  | Negative |
| P11916 | GILLGLSHLSLSQNWATFQQ  | Negative |
| P11916 | LLVFGILLGLSHLSLSQNWA  | Negative |
| P11916 | LGLSHLSLSQNWATFQQKHI  | Negative |
| P11916 | SHLSLSQNWATFQQKHIINT  | Negative |
| P11916 | SLSQNWATFQQKHIINTPII  | Negative |
| P11916 | MCAKSLLL VFGILLGLSHLS | Negative |
| P11916 | FGILLGLSHLSLSQNWATFQ  | Negative |
| P11916 | QNWATFQQKHIINTPIINC   | Negative |
| P11916 | SLLL VFGILLGLSHLSLSQN | Negative |
| P11916 | HLSLSQNWATFQQKHIINTP  | Negative |
| P11916 | SQNWATFQQKHIINTPIINC  | Negative |
| P11916 | KSLLL VFGILLGLSHLSLSQ | Negative |
| P11916 | LLGLSHLSLSQNWATFQQKH  | Negative |
| P11916 | ATFQQKHIINTPIINCNTIM  | Negative |
| P11916 | QKHIINTPIINCNTIMDNNI  | Negative |

|        |                       |          |
|--------|-----------------------|----------|
| P11916 | VFGILLGLSHLSLSQNWATF  | Negative |
| P11916 | LSHLSLSQNWATFQQKHIIN  | Negative |
| P11916 | GLSHLSLSQNWATFQQKHII  | Negative |
| P11916 | LLLVFGILLGLSHLSLSQNW  | Negative |
| P11916 | TFQQKHIINTPIINCNTIMD  | Negative |
| P11916 | FQQKHIINTPIINCNTIMDN  | Negative |
| P11919 | FGYVECNPAIATGYDPMEIC  | Negative |
| P11919 | LANFGYVECNPAIATGYDPM  | Negative |
| P11919 | FMFAMIAFLANFGYVECNPA  | Negative |
| P11919 | ANFGYVECNPAIATGYDPME  | Negative |
| P11919 | TVAFFMFAMIAFLANFGYVE  | Negative |
| P11919 | VECNPAIATGYDPMEICIEN  | Negative |
| P11919 | VTVAFFMFAMIAFLANFGYV  | Negative |
| P11919 | MFAMIAFLANFGYVECNPAI  | Negative |
| P11919 | AIATGYDPMEICIENCAQCK  | Negative |
| P11919 | AGKVTVAFFMFAMIAFLANF  | Negative |
| P11919 | VAFFMFAMIAFLANFGYVEC  | Negative |
| P11919 | AMIAFLANFGYVECNPAIAT  | Negative |
| P11919 | FFMFAMIAFLANFGYVECNP  | Negative |
| P11919 | IAFLANFGYVECNPAIATGY  | Negative |
| P11919 | IATGYDPMEICIENCAQCKK  | Negative |
| P11919 | MIAFLANFGYVECNPAIATG  | Negative |
| P11919 | CNPAIATGYDPMEICIENCA  | Negative |
| P11919 | PAIATGYDPMEICIENCAQC  | Negative |
| P11919 | KVTVAFFMFAMIAFLANFGY  | Negative |
| P11919 | GYVECNPAIATGYDPMEICI  | Negative |
| P11919 | YVECNPAIATGYDPMEICIE  | Negative |
| P11919 | AFFMFAMIAFLANFGYVECN  | Negative |
| P11919 | ECNPAIATGYDPMEICIENC  | Negative |
| P11919 | GKVTVAFFMFAMIAFLANFG  | Negative |
| P11919 | AFLANFGYVECNPAIATGYD  | Negative |
| P11919 | FLANFGYVECNPAIATGYDP  | Negative |
| P11919 | NFGYVECNPAIATGYDPMEI  | Negative |
| P11919 | NPAIATGYDPMEICIENCAQ  | Negative |
| P11919 | MAGKVTVAFFMFAMIAFLAN  | Negative |
| P11936 | ARLMGALLALAGLLQLALSL  | Negative |
| P11936 | AARLMGALLALAGLLQLALS  | Negative |
| P11936 | ALAGLLQLALSLRIA AFNIR | Negative |
| P11936 | LMGALLALAGLLQLALSLRI  | Negative |
| P11936 | QLALSLRIA AFNIRTFGETK | Negative |
| P11936 | LRIA AFNIRTFGETKMSNAT | Negative |
| P11936 | LLQLALSLRIA AFNIRTFGE | Negative |
| P11936 | RAARLMGALLALAGLLQLAL  | Negative |
| P11936 | RLMGALLALAGLLQLALSLR  | Negative |
| P11936 | IAAFNIRTFGETKMSNATLS  | Negative |
| P11936 | LLALAGLLQLALSLRIA AFN | Negative |

|        |                       |          |
|--------|-----------------------|----------|
| P11936 | IRTFGETKMSNATLSNYIVR  | Negative |
| P11936 | LALSLRIA AFNIRTFGETKM | Negative |
| P11936 | MGALLALAGLLQLALSLRIA  | Negative |
| P11936 | LAGLLQLALSLRIA AFNIRT | Negative |
| P11936 | RIA AFNIRTFGETKMSNATL | Negative |
| P11936 | FNIRTFGETKMSNATLSNYI  | Negative |
| P11936 | ALSLRIA AFNIRTFGETKMS | Negative |
| P11936 | ALLALAGLLQLALSLRIA AF | Negative |
| P11936 | GLLQLALSLRIA AFNIRTFG | Negative |
| P11936 | SLRIA AFNIRTFGETKMSNA | Negative |
| P11936 | LSLRIA AFNIRTFGETKMSN | Negative |
| P11936 | LALAGLLQLALSLRIA AFNI | Negative |
| P11936 | AGLLQLALSLRIA AFNIRTF | Negative |
| P11936 | AAFNIRTFGETKMSNATLSN  | Negative |
| P11936 | AFNIRTFGETKMSNATLSNY  | Negative |
| P11936 | NIRTFGETKMSNATLSNYIV  | Negative |
| P11936 | MRAARLMGALLALAGLLQLA  | Negative |
| P11936 | LQLALSLRIA AFNIRTFGET | Negative |
| P12024 | LTITLMIMIWM SLARASMFD | Negative |
| P12024 | IWM SLARASMFDREMEETHY | Negative |
| P12024 | MGLEFFFKFGYAFLTITLMI  | Negative |
| P12024 | RASMFDREMEETHYPPCTYN  | Negative |
| P12024 | LMIMIWM SLARASMFDREME | Negative |
| P12024 | LEFFFKFGYAFLTITLMIMI  | Negative |
| P12024 | ARASMFDREMEETHYPPCTY  | Negative |
| P12024 | SLARASMFDREMEETHYPPC  | Negative |
| P12024 | FLTITLMIMIWM SLARASMF | Negative |
| P12024 | FKFGYAFLTITLMIMIWM SL | Negative |
| P12024 | MSLARASMFDREMEETHYPP  | Negative |
| P12024 | YAFLTITLMIMIWM SLARAS | Negative |
| P12024 | EFFFKFGYAFLTITLMIMIW  | Negative |
| P12024 | MIMIWM SLARASMFDREMEE | Negative |
| P12024 | FFFKFGYAFLTITLMIMIWM  | Negative |
| P12024 | ITLMIMIWM SLARASMFDRE | Negative |
| P12024 | SMFDREMEETHYPPCTYNVM  | Negative |
| P12024 | FGYAFLTITLMIMIWM SLAR | Negative |
| P12024 | WMSLARASMFDREMEETHYP  | Negative |
| P12024 | LARASMFDREMEETHYPPCT  | Negative |
| P12024 | AFLTITLMIMIWM SLARASM | Negative |
| P12024 | IMIWM SLARASMFDREMEET | Negative |
| P12024 | MIWM SLARASMFDREMEETH | Negative |
| P12024 | TLIMIWM SLARASMFDREM  | Negative |
| P12024 | GYAFLTITLMIMIWM SLARA | Negative |
| P12024 | ASMFDREMEETHYPPCTYNV  | Negative |
| P12024 | GLEFFFKFGYAFLTITLMIM  | Negative |
| P12024 | KFGYAFLTITLMIMIWM SLA | Negative |

|        |                      |          |
|--------|----------------------|----------|
| P12024 | FFKFGYAFLTITLMIMIWMS | Negative |
| P12061 | ASAVAVLALIACGSAHAAGF | Negative |
| P12061 | ACGSAHAAGFVGNKAVVQAA | Negative |
| P12061 | LALIACGSAHAAGFVGNKAV | Negative |
| P12061 | CGSAHAAGFVGNKAVVQAAV | Negative |
| P12061 | SAVAVLALIACGSAHAAGFV | Negative |
| P12061 | SAHAAGFVGNKAVVQAAVTI | Negative |
| P12061 | FVGNKAVVQAAVTIAAQNTT | Negative |
| P12061 | ALIACGSAHAAGFVGNKAVV | Negative |
| P12061 | VGNKAVVQAAVTIAAQNTTS | Negative |
| P12061 | VVQAAVTIAAQNTTSANWSQ | Negative |
| P12061 | AHAAGFVGNKAVVQAAVTIA | Negative |
| P12061 | AAGFVGNKAVVQAAVTIAAQ | Negative |
| P12061 | GFVGNKAVVQAAVTIAAQNT | Negative |
| P12061 | NKAVVQAAVTIAAQNTTSAN | Negative |
| P12061 | SASAVAVLALIACGSAHAAG | Negative |
| P12061 | RKSASAVAVLALIACGSAHA | Negative |
| P12061 | HAAGFVGNKAVVQAAVTIAA | Negative |
| P12061 | IACGSAHAAGFVGNKAVVQA | Negative |
| P12061 | VLALIACGSAHAAGFVGNKA | Negative |
| P12061 | VAVLALIACGSAHAAGFVGN | Negative |
| P12061 | MRKSASAVAVLALIACGSAH | Negative |
| P12061 | LIACGSAHAAGFVGNKAVVQ | Negative |
| P12061 | GSAHAAGFVGNKAVVQAAVT | Negative |
| P12061 | KSASAVAVLALIACGSAHAA | Negative |
| P12061 | KAVVQAAVTIAAQNTTSANW | Negative |
| P12061 | AVVQAAVTIAAQNTTSANWS | Negative |
| P12061 | GNKAVVQAAVTIAAQNTTSA | Negative |
| P12061 | AGFVGNKAVVQAAVTIAAQN | Negative |
| P12061 | AVLALIACGSAHAAGFVGNK | Negative |
| P12068 | LLLSVSVQAKVYDRCEFARI | Negative |
| P12068 | MKTLLVLALLLSVSVQAKV  | Negative |
| P12068 | DRCEFARILKKSGMDGYRGV | Negative |
| P12068 | QAKVYDRCEFARILKKSGMD | Negative |
| P12068 | AKVYDRCEFARILKKSGMDG | Negative |
| P12068 | ARILKKSGMDGYRGVSLANW | Negative |
| P12068 | ILKKSGMDGYRGVSLANWVC | Negative |
| P12068 | LLLSVSVQAKVYDRCEFAR  | Negative |
| P12068 | KTLLVLALLLSVSVQAKVY  | Negative |
| P12068 | SVSVQAKVYDRCEFARILKK | Negative |
| P12068 | ALLLSVSVQAKVYDRCEFA  | Negative |
| P12068 | LVLALLLSVSVQAKVYDRC  | Negative |
| P12068 | VQAKVYDRCEFARILKKSGM | Negative |
| P12068 | LALLLSVSVQAKVYDRCEF  | Negative |
| P12068 | SVQAKVYDRCEFARILKKSG | Negative |
| P12068 | LLSVSVQAKVYDRCEFARIL | Negative |

|        |                      |          |
|--------|----------------------|----------|
| P12068 | LSVSVQAKVYDRCEFARILK | Negative |
| P12068 | VYDRCEFARILKKSGMDGYR | Negative |
| P12068 | FARILKKSGMDGYRGVSLAN | Negative |
| P12068 | LKKSGMDGYRGVSLANWVCL | Negative |
| P12068 | TLLVLALLLLSVSVQAKVYD | Negative |
| P12068 | VLALLLLSVSVQAKVYDRCE | Negative |
| P12068 | KVYDRCEFARILKKSGMDGY | Negative |
| P12068 | VSVQAKVYDRCEFARILKKS | Negative |
| P12068 | EFARILKKSGMDGYRGVSLA | Negative |
| P12068 | YDRCEFARILKKSGMDGYRG | Negative |
| P12068 | RCEFARILKKSGMDGYRGVS | Negative |
| P12068 | RILKKSGMDGYRGVSLANWV | Negative |
| P12068 | CEFARILKKSGMDGYRGVSL | Negative |
| P12266 | NGGTVHFKGEVVNAACAVDA | Negative |
| P12266 | LAIVVLSALSLSAAALADT  | Negative |
| P12266 | SALSLSAAALADTTTVNGG  | Negative |
| P12266 | ADTTTVNGGTVHFKGEVVNA | Negative |
| P12266 | LSALSLSAAALADTTTVNG  | Negative |
| P12266 | SAAALADTTTVNGGTVHFKG | Negative |
| P12266 | TTTVNGGTVHFKGEVVNAAC | Negative |
| P12266 | VLSALSLSAAALADTTTVN  | Negative |
| P12266 | TVNGGTVHFKGEVVNAACAV | Negative |
| P12266 | KTLAIVVLSALSLSAAALA  | Negative |
| P12266 | IKTLAIVVLSALSLSAAAL  | Negative |
| P12266 | TTVNGGTVHFKGEVVNAACA | Negative |
| P12266 | GGTVHFKGEVVNAACAVDAG | Negative |
| P12266 | AALADTTTVNGGTVHFKGEV | Negative |
| P12266 | AIVVLSALSLSAAALADTT  | Negative |
| P12266 | LSSAAALADTTTVNGGTVHF | Negative |
| P12266 | LADTTTVNGGTVHFKGEVVN | Negative |
| P12266 | MKIKTLAIVVLSALSLSAA  | Negative |
| P12266 | SSAAALADTTTVNGGTVHFK | Negative |
| P12266 | IVVLSALSLSAAALADTTT  | Negative |
| P12266 | AAALADTTTVNGGTVHFKGE | Negative |
| P12266 | DTTVNGGTVHFKGEVVNAA  | Negative |
| P12266 | ALSLSSAAALADTTTVNGGT | Negative |
| P12266 | VNGGTVHFKGEVVNAACAVD | Negative |
| P12266 | SLSSAAALADTTTVNGGTVH | Negative |
| P12266 | LSLSSAAALADTTTVNGGTV | Negative |
| P12266 | KIKTLAIVVLSALSLSAAA  | Negative |
| P12266 | ALADTTTVNGGTVHFKGEVV | Negative |
| P12266 | TLAIVVLSALSLSAAALAD  | Negative |
| P12273 | MRLQLLFRASPATLLLVLCL | Negative |
| P12273 | DNTRKIIKNFDIPKSVRPN  | Negative |
| P12273 | LLFRASPATLLLVLCLQLGA | Negative |
| P12273 | LLVLCLQLGANKAQDNTRKI | Negative |



|        |                      |          |
|--------|----------------------|----------|
| P12273 | LVLCLQLGANKAQDNTRKII | Negative |
| P12273 | KAQDNTRKIIIKNFDIPKSV | Negative |
| P12273 | GANKAQDNTRKIIIKNFDIP | Negative |
| P12273 | ASPATLLLVLCLQLGANKAQ | Negative |
| P12273 | QDNTRKIIIKNFDIPKSVRP | Negative |
| P12273 | CLQLGANKAQDNTRKIIIKN | Negative |
| P12273 | QLLFRASPATLLLVLCLQLG | Negative |
| P12273 | NKAQDNTRKIIIKNFDIPKS | Negative |
| P12273 | LCLQLGANKAQDNTRKIIIK | Negative |
| P12273 | LGANKAQDNTRKIIIKNFDI | Negative |
| P12273 | SPATLLLVLCLQLGANKAQD | Negative |
| P12273 | ANKAQDNTRKIIIKNFDIPK | Negative |
| P12273 | LFRASPATLLLVLCLQLGAN | Negative |
| P12273 | LQLGANKAQDNTRKIIIKNF | Negative |
| P12273 | PATLLLVLCLQLGANKAQDN | Negative |
| P12273 | LLLVLCLQLGANKAQDNTRK | Negative |
| P12273 | LLQLLFRASPATLLLVLCLQ | Negative |
| P12273 | AQDNTRKIIIKNFDIPKSVR | Negative |
| P12273 | LQLLFRASPATLLLVLCLQL | Negative |
| P12273 | ATLLLVLCLQLGANKAQDNT | Negative |
| P12273 | QLGANKAQDNTRKIIIKNFD | Negative |
| P12273 | RLLQLLFRASPATLLLVLCL | Negative |
| P12273 | RASPATLLLVLCLQLGANKA | Negative |
| P12273 | VLCLQLGANKAQDNTRKIII | Negative |
| P12273 | FRASPATLLLVLCLQLGANK | Negative |
| P12293 | TAPATANDQLVELAKDPANW | Negative |
| P12293 | LTAPATANDQLVELAKDPA  | Negative |
| P12293 | AMAVAMGLAVLTAPATAND  | Negative |
| P12293 | PKARGASSLAMAVAMGLAVL | Negative |
| P12293 | RGASSLAMAVAMGLAVLTTA | Negative |
| P12293 | PATANDQLVELAKDPANWVM | Negative |
| P12293 | APATANDQLVELAKDPANWV | Negative |
| P12293 | NRNTPKARGASSLAMAVAMG | Negative |
| P12293 | KARGASSLAMAVAMGLAVLT | Negative |
| P12293 | LAVLTAPATANDQLVELAK  | Negative |
| P12293 | RNTPKARGASSLAMAVAMGL | Negative |
| P12293 | ARGASSLAMAVAMGLAVLTT | Negative |
| P12293 | NTPKARGASSLAMAVAMGLA | Negative |
| P12293 | TTAPATANDQLVELAKDPAN | Negative |
| P12293 | LAMAVAMGLAVLTAPATAN  | Negative |
| P12293 | SSLAMAVAMGLAVLTAPAT  | Negative |
| P12293 | AMGLAVLTAPATANDQLVE  | Negative |
| P12293 | GASSLAMAVAMGLAVLTTAP | Negative |
| P12293 | MGLAVLTAPATANDQLVEL  | Negative |
| P12293 | AVLTAPATANDQLVELAKD  | Negative |
| P12293 | ATANDQLVELAKDPANWVMT | Negative |

|        |                      |          |
|--------|----------------------|----------|
| P12293 | MAVAMGLAVLTTAPATANDQ | Negative |
| P12293 | MNRNTPKARGASSLAMAVAM | Negative |
| P12293 | GLAVLTTAPATANDQLVELA | Negative |
| P12293 | SLAMAVAMGLAVLTTAPATA | Negative |
| P12293 | TPKARGASSLAMAVAMGLAV | Negative |
| P12293 | AVAMGLAVLTTAPATANDQL | Negative |
| P12293 | ASSLAMAVAMGLAVLTTAPA | Negative |
| P12293 | VLTTAPATANDQLVELAKDP | Negative |
| P12334 | SVLAAGCSVDVEANDAMQYN | Negative |
| P12334 | LFSGSVLAAGCSVDVEANDA | Negative |
| P12334 | AGCSVDVEANDAMQYNTKNI | Negative |
| P12334 | VEANDAMQYNTKNIDVEKSC | Negative |
| P12334 | KSSKIVAILLASLFSGSVLA | Negative |
| P12334 | CSVDVEANDAMQYNTKNIDV | Negative |
| P12334 | ILLASLFSGSVLAAGCSVDV | Negative |
| P12334 | SGSVLAAGCSVDVEANDAMQ | Negative |
| P12334 | VDVEANDAMQYNTKNIDVEK | Negative |
| P12334 | FSGSVLAAGCSVDVEANDAM | Negative |
| P12334 | ASLFSGSVLAAGCSVDVEAN | Negative |
| P12334 | GCSVDVEANDAMQYNTKNID | Negative |
| P12334 | LAAGCSVDVEANDAMQYNTK | Negative |
| P12334 | IVAILLASLFSGSVLAAGCS | Negative |
| P12334 | SVDVEANDAMQYNTKNIDVE | Negative |
| P12334 | SKIVAILLASLFSGSVLAAG | Negative |
| P12334 | SLFSGSVLAAGCSVDVEAND | Negative |
| P12334 | DVEANDAMQYNTKNIDVEKS | Negative |
| P12334 | AAGCSVDVEANDAMQYNTKN | Negative |
| P12334 | AILLASLFSGSVLAAGCSVD | Negative |
| P12334 | KIVAILLASLFSGSVLAAGC | Negative |
| P12334 | ANDAMQYNTKNIDVEKSCKE | Negative |
| P12334 | MKSSKIVAILLASLFSGSVL | Negative |
| P12334 | VLAAGCSVDVEANDAMQYNT | Negative |
| P12334 | GSVLAAGCSVDVEANDAMQY | Negative |
| P12334 | SSKIVAILLASLFSGSVLAA | Negative |
| P12334 | EANDAMQYNTKNIDVEKSCK | Negative |
| P12334 | LASLFSGSVLAAGCSVDVEA | Negative |
| P12334 | LLASLFSGSVLAAGCSVDVE | Negative |
| P12337 | SLAACTAWGHPSAPPVVDTV | Negative |
| P12337 | HPSAPPVVDTVHGKVLGKFV | Negative |
| P12337 | ASLAACTAWGHPSAPPVVDT | Negative |
| P12337 | CTAWGHPSAPPVVDTVHGKV | Negative |
| P12337 | LALASLAACTAWGHPSAPPV | Negative |
| P12337 | SAPPVVDTVHGKVLGKFVSL | Negative |
| P12337 | HGKVLGKFVSLEGFAQPVAV | Negative |
| P12337 | PSAPPVVDTVHGKVLGKFVS | Negative |
| P12337 | GHPSAPPVVDTVHGKVLGKF | Negative |

|        |                      |          |
|--------|----------------------|----------|
| P12337 | VVDTVHGKVLGKFVSLEGFA | Negative |
| P12337 | VHGKVLGKFVSLEGFAQPVA | Negative |
| P12337 | TVHGKVLGKFVSLEGFAQPV | Negative |
| P12337 | WLCALALASLAECTAWGHPS | Negative |
| P12337 | WGHPSAPPVVDTVHGKVLGK | Negative |
| P12337 | ACTAWGHPSAPPVVDTVHGK | Negative |
| P12337 | VDTVHGKVLGKFVSLEGFAQ | Negative |
| P12337 | PPVVDTVHGKVLGKFVSLEG | Negative |
| P12337 | LCALALASLAECTAWGHPSA | Negative |
| P12337 | LAECTAWGHPSAPPVVDTVH | Negative |
| P12337 | LASLAECTAWGHPSAPPVVD | Negative |
| P12337 | TAWGHPSAPPVVDTVHGKVL | Negative |
| P12337 | PVVDTVHGKVLGKFVSLEGF | Negative |
| P12337 | ALALASLAECTAWGHPSAPP | Negative |
| P12337 | AACTAWGHPSAPPVVDTVHG | Negative |
| P12337 | MWLCALALASLAECTAWGHP | Negative |
| P12337 | DTVHGKVLGKFVSLEGFAQP | Negative |
| P12337 | APPVVDTVHGKVLGKFVSLE | Negative |
| P12337 | AWGHPSAPPVVDTVHGKVLG | Negative |
| P12337 | ALASLAECTAWGHPSAPPVV | Negative |
| P12346 | AALGLCLAVPDKTVKWCAVS | Negative |
| P12346 | VPDKTVKWCAVSEHENTKCI | Negative |
| P12346 | WCAVSEHENTKCISFRDHMK | Negative |
| P12346 | MRFavgALLACAALGLCLAV | Negative |
| P12346 | LACAALGLCLAVPDKTVKWC | Negative |
| P12346 | VKWCAVSEHENTKCISFRDH | Negative |
| P12346 | KWCAVSEHENTKCISFRDHM | Negative |
| P12346 | FAVGALLACAALGLCLAVPD | Negative |
| P12346 | ALLACAALGLCLAVPDKTVK | Negative |
| P12346 | CLAVPDKTVKWCAVSEHENT | Negative |
| P12346 | PDKTVKWCAVSEHENTKCIS | Negative |
| P12346 | DKTVKWCAVSEHENTKCISF | Negative |
| P12346 | AVPDKTVKWCAVSEHENTKC | Negative |
| P12346 | LAVPDKTVKWCAVSEHENTK | Negative |
| P12346 | LGLCLAVPDKTVKWCAVSEH | Negative |
| P12346 | CAALGLCLAVPDKTVKWCAV | Negative |
| P12346 | ALGLCLAVPDKTVKWCAVSE | Negative |
| P12346 | ACAALGLCLAVPDKTVKWCA | Negative |
| P12346 | AVSEHENTKCISFRDHMKTV | Negative |
| P12346 | RFAVGALLACAALGLCLAVP | Negative |
| P12346 | VSEHENTKCISFRDHMKTVL | Negative |
| P12346 | LLACAALGLCLAVPDKTVKW | Negative |
| P12346 | KTVKWCAVSEHENTKCISFR | Negative |
| P12346 | GLCLAVPDKTVKWCAVSEHE | Negative |
| P12346 | AVGALLACAALGLCLAVPDK | Negative |
| P12346 | CAVSEHENTKCISFRDHMKT | Negative |

|        |                      |          |
|--------|----------------------|----------|
| P12346 | GALLACAALGLCLAVPDKTV | Negative |
| P12346 | LCLAVPDKTVKWCAVSEHEN | Negative |
| P12346 | TVKWCAVSEHENTKCISFRD | Negative |
| P12375 | RLHVCSLLAVSSLGMLPVG  | Negative |
| P12375 | LHVCSLLAVSSLGMLPVG   | Negative |
| P12375 | GMLPVGVFAAEAAMP      | Negative |
| P12375 | EAAMP                | Negative |
| P12375 | AAMP                 | Negative |
| P12375 | AVSSLGMLPVGVF        | Negative |
| P12375 | LNRLHVCSLLAVSSLGMLP  | Negative |
| P12375 | SSLGMLPVGVF          | Negative |
| P12375 | MLPVGVF              | Negative |
| P12375 | CSLLAVSSLGMLPVG      | Negative |
| P12375 | VGVFAAEAAMP          | Negative |
| P12375 | NRLHVCSLLAVSSLGMLP   | Negative |
| P12375 | LLAVSSLGMLPVG        | Negative |
| P12375 | LPVGVF               | Negative |
| P12375 | VCSLLAVSSLGMLPVG     | Negative |
| P12375 | FAAEAAMP             | Negative |
| P12375 | LGMLPVGVF            | Negative |
| P12375 | VLNRLHVCSLLAVSSLGMLP | Negative |
| P12375 | SLGMLPVGVF           | Negative |
| P12375 | TVLNRLHVCSLLAVSSLGML | Negative |
| P12375 | HVCSLLAVSSLGMLPVG    | Negative |
| P12375 | AAEAAMP              | Negative |
| P12375 | GVFAAEAAMP           | Negative |
| P12375 | MTVLNRLHVCSLLAVSSLGM | Negative |
| P12375 | VFAAEAAMP            | Negative |
| P12375 | AEAAMP               | Negative |
| P12375 | VSSLGMLPVGVF         | Negative |
| P12375 | SLLAVSSLGMLPVG       | Negative |
| P12375 | PVGVF                | Negative |
| P12376 | SSTPAEGSEGAAPAKIELHF | Negative |
| P12376 | LAQAHPKLVSSTPAEGSEGA | Negative |
| P12376 | ALAQAHPKLVSSTPAEGSEG | Negative |
| P12376 | AGMLVSALAQAHPKLVSSTP | Negative |
| P12376 | VTLFAAGMLVSALAQAHPKL | Negative |
| P12376 | FVTLFAAGMLVSALAQAHPK | Negative |
| P12376 | SFVTLFAAGMLVSALAQAHP | Negative |
| P12376 | LLNRTSFVTLFAAGMLVSAL | Negative |
| P12376 | GMLVSALAQAHPKLVSSTPA | Negative |
| P12376 | NRTSFVTLFAAGMLVSALAQ | Negative |
| P12376 | KLVSSTPAEGSEGAAPAKIE | Negative |
| P12376 | SALAQAHPKLVSSTPAEGSE | Negative |
| P12376 | VSSTPAEGSEGAAPAKIELH | Negative |
| P12376 | RTSFVTLFAAGMLVSALAQ  | Negative |

|        |                      |          |
|--------|----------------------|----------|
| P12376 | LVSALAQAHPKLVSTPAEG  | Negative |
| P12376 | FAAGMLVSALAQAHPKLVSS | Negative |
| P12376 | MLVSALAQAHPKLVSTPAE  | Negative |
| P12376 | PKLVSTPAEGSEGAAPAKI  | Negative |
| P12376 | LVSTPAEGSEGAAPAKIEL  | Negative |
| P12376 | LNRTSFVTLFAAGMLVSALA | Negative |
| P12376 | QAHPKLVSTPAEGSEGAAP  | Negative |
| P12376 | MLLNRTSFVTLFAAGMLVSA | Negative |
| P12376 | AHPKLVSTPAEGSEGAAPA  | Negative |
| P12376 | HPKLVSTPAEGSEGAAPAK  | Negative |
| P12376 | LFAAGMLVSALAQAHPKLV  | Negative |
| P12376 | TSFVTLFAAGMLVSALAAH  | Negative |
| P12376 | VSALAQAHPKLVSTPAEGS  | Negative |
| P12376 | AAGMLVSALAQAHPKLVST  | Negative |
| P12376 | AQAHPKLVSTPAEGSEGAA  | Negative |
| P12387 | VSLALGDPMYSIITPNILRL | Negative |
| P12387 | LLLLLLASVSLALGDPMYSI | Negative |
| P12387 | GPSLLLLLLASVSLALGDPM | Negative |
| P12387 | YSIITPNILRLENEETVVLE | Negative |
| P12387 | GDPMYSIITPNILRLENEET | Negative |
| P12387 | PMYSIITPNILRLENEETVV | Negative |
| P12387 | LLASVSLALGDPMYSIITPN | Negative |
| P12387 | LLLASVSLALGDPMYSIITP | Negative |
| P12387 | MGPAAGPSLLLLLLASVSLA | Negative |
| P12387 | SLALGDPMYSIITPNILRLE | Negative |
| P12387 | AAGPSLLLLLLASVSLALGD | Negative |
| P12387 | MYSIITPNILRLENEETVVL | Negative |
| P12387 | ASVSLALGDPMYSIITPNIL | Negative |
| P12387 | LLLLLASVSLALGDPMYSII | Negative |
| P12387 | PAAGPSLLLLLLASVSLALG | Negative |
| P12387 | PSLLLLLLASVSLALGDPMY | Negative |
| P12387 | AGPSLLLLLLASVSLALGDP | Negative |
| P12387 | IITPNILRLENEETVVLEAH | Negative |
| P12387 | LLLLASVSLALGDPMYSIIT | Negative |
| P12387 | DPMYSIITPNILRLENEETV | Negative |
| P12387 | SIITPNILRLENEETVVLEA | Negative |
| P12387 | ITPNILRLENEETVVLEAHE | Negative |
| P12387 | LALGDPMYSIITPNILRLEN | Negative |
| P12387 | LGDPMSIITPNILRLENEE  | Negative |
| P12387 | TPNILRLENEETVVLEAHEV | Negative |
| P12387 | SVSLALGDPMYSIITPNILR | Negative |
| P12387 | GPAAGPSLLLLLLASVSLAL | Negative |
| P12387 | LASVSLALGDPMYSIITPNI | Negative |
| P12387 | ALGDPMYSIITPNILRLENE | Negative |
| P12420 | LLCKSVASLPICPSGAVNC  | Negative |
| P12420 | LCKSVASLPICPSGAVNCQV | Negative |

|        |                      |          |
|--------|----------------------|----------|
| P12420 | SLPICPSGAVNCQVSLRELF | Negative |
| P12420 | LLLLLLLVSDDLCKSVASL  | Negative |
| P12420 | VSDLLCKSVASLPICPSGA  | Negative |
| P12420 | SDLLCKSVASLPICPSGAV  | Negative |
| P12420 | ASLPICPSGAVNCQVSLREL | Negative |
| P12420 | DLLCKSVASLPICPSGAVN  | Negative |
| P12420 | GSLLLLLLVSDLLCKSVA   | Negative |
| P12420 | SVASLPICPSGAVNCQVSLR | Negative |
| P12420 | KKRSSLKGSLLLLLLLVSDL | Negative |
| P12420 | LVSDLLCKSVASLPICPSG  | Negative |
| P12420 | CKSVASLPICPSGAVNCQVS | Negative |
| P12420 | LLVSDLLCKSVASLPICPS  | Negative |
| P12420 | KSVASLPICPSGAVNCQVSL | Negative |
| P12420 | KRSSLKGSLLLLLLLVSDLL | Negative |
| P12420 | LLCKSVASLPICPSGAVNCQ | Negative |
| P12420 | RSSLKGSLLLLLLLVSDLL  | Negative |
| P12420 | LLLLVSDLLCKSVASLPIC  | Negative |
| P12420 | LLLLLVSDLLCKSVASLP   | Negative |
| P12420 | SLKGSLLLLLLLVSDLLCK  | Negative |
| P12420 | MDKKRSSLKGSLLLLLLVS  | Negative |
| P12420 | LLLLVSDLLCKSVASLPI   | Negative |
| P12420 | SLLLLLLLVSDLLCKSVAS  | Negative |
| P12420 | LKGSLLLLLLLVSDLLCKS  | Negative |
| P12420 | DKKRSSLKGSLLLLLLVSD  | Negative |
| P12420 | VASLPICPSGAVNCQVSLRE | Negative |
| P12420 | KGSLLLLLLLVSDLLCKSV  | Negative |
| P12420 | SSLKGSLLLLLLLVSDLLC  | Negative |
| P12550 | ALCVVGAIASPLSADEAAIV | Negative |
| P12550 | EAAIVKSSWDQVKHNEVDIL | Negative |
| P12550 | LSADEAAIVKSSWDQVKHNE | Negative |
| P12550 | VGAIASPLSADEAAIVKSSW | Negative |
| P12550 | AVLALCVVGAIASPLSADEA | Negative |
| P12550 | PLSADEAAIVKSSWDQVKHN | Negative |
| P12550 | KSSWDQVKHNEVDILAAVFA | Negative |
| P12550 | FAVLALCVVGAIASPLSADE | Negative |
| P12550 | VKSSWDQVKHNEVDILAAVF | Negative |
| P12550 | SPLSADEAAIVKSSWDQVKH | Negative |
| P12550 | AIVKSSWDQVKHNEVDILAA | Negative |
| P12550 | FFAVLALCVVGAIASPLSAD | Negative |
| P12550 | AIASPLSADEAAIVKSSWDQ | Negative |
| P12550 | VVGAIASPLSADEAAIVKSS | Negative |
| P12550 | LCVVGAIASPLSADEAAIVK | Negative |
| P12550 | VLALCVVGAIASPLSADEAA | Negative |
| P12550 | AAIVKSSWDQVKHNEVDILA | Negative |
| P12550 | MKFFAVLALCVVGAIASPLS | Negative |
| P12550 | ADEAAIVKSSWDQVKHNEVD | Negative |

|        |                       |          |
|--------|-----------------------|----------|
| P12550 | GAIASPLSADEAAIVKSSWD  | Negative |
| P12550 | IASPLSADEAAIVKSSWDQV  | Negative |
| P12550 | CVVGAIASPLSADEAAIVKS  | Negative |
| P12550 | DEAAIVKSSWDQVKHNEVDI  | Negative |
| P12550 | LALCVVGAIASPLSADEAAI  | Negative |
| P12550 | ASPLSADEAAIVKSSWDQVK  | Negative |
| P12550 | IVKSSWDQVKHNEVDILAAV  | Negative |
| P12550 | SWDQVKHNEVDILAAVFAAY  | Negative |
| P12550 | SSWDQVKHNEVDILAAVFAA  | Negative |
| P12550 | SADEAAIVKSSWDQVKHNEV  | Negative |
| P12637 | RAEEGLNFPTYDGKDRVVSL  | Negative |
| P12637 | MKRTHLFIAGLYLLASCRAE  | Negative |
| P12637 | FPTYDGKDRVVSLTEKNFKQ  | Negative |
| P12637 | YDGKDRVVSLTEKNFKQVLK  | Negative |
| P12637 | LYLLASCRAEEGLNFPTYDG  | Negative |
| P12637 | RTHLFIAGLYLLASCRAEEG  | Negative |
| P12637 | THLFIAGLYLLASCRAEEGL  | Negative |
| P12637 | KRTHLFIAGLYLLASCRAEE  | Negative |
| P12637 | DGKDRVVSLTEKNFKQVLKK  | Negative |
| P12637 | GLYLLASCRAEEGLNFPTYD  | Negative |
| P12637 | SCRAEEGLNFPTYDGKDRVV  | Negative |
| P12637 | LASCRAEEGLNFPTYDGKDR  | Negative |
| P12637 | IAGLYLLASCRAEEGLNFPT  | Negative |
| P12637 | LFIAGLYLLASCRAEEGLNF  | Negative |
| P12637 | YLLASCRAEEGLNFPTYDGK  | Negative |
| P12637 | GKDRVVSLTEKNFKQVLKKY  | Negative |
| P12637 | LNPTYDGKDRVVSLTEKNF   | Negative |
| P12637 | CRAEEGLNFPTYDGKDRVVS  | Negative |
| P12637 | GLNFPTYDGKDRVVSLTEKN  | Negative |
| P12637 | LLASCRAEEGLNFPTYDGKD  | Negative |
| P12637 | AEEGLNFPTYDGKDRVVSLT  | Negative |
| P12637 | ASCRAEEGLNFPTYDGKDRV  | Negative |
| P12637 | EGLNFPTYDGKDRVVSLTEK  | Negative |
| P12637 | PTYDGKDRVVSLTEKNFKQV  | Negative |
| P12637 | NFPTYDGKDRVVSLTEKNFK  | Negative |
| P12637 | TYDGKDRVVSLTEKNFKQVL  | Negative |
| P12637 | AGLYLLASCRAEEGLNFPTY  | Negative |
| P12637 | EEGLNFPTYDGKDRVVSLTE  | Negative |
| P12637 | FIAGLYLLASCRAEEGLNFP  | Negative |
| P12670 | NNCPYTVWAASTPIGGGRRRL | Negative |
| P12670 | ATIEVRNNCPYTVWAASTPI  | Negative |
| P12670 | NCPYTVWAASTPIGGGRRRLN | Negative |
| P12670 | IEVRNNCPYTVWAASTPIGG  | Negative |
| P12670 | FVLFFLLCVTYTYAATIEVR  | Negative |
| P12670 | LTSSFVLFFLLCVTYTYAAT  | Negative |
| P12670 | TYAATIEVRNNCPYTVWAAS  | Negative |

|        |                       |          |
|--------|-----------------------|----------|
| P12670 | CVTYTYAATIEVRNNCPYTV  | Negative |
| P12670 | VLFFLLCVTYTYAATIEVRN  | Negative |
| P12670 | CPYTVWAASTPIGGGRRLLNR | Negative |
| P12670 | FFLLCVTYTYAATIEVRNNC  | Negative |
| P12670 | MGYLTSSFVLFFLLCVTYTY  | Negative |
| P12670 | LLCVTYTYAATIEVRNNCPY  | Negative |
| P12670 | YAATIEVRNNCPYTVWAAST  | Negative |
| P12670 | YLTSSFVLFFLLCVTYTYAA  | Negative |
| P12670 | YTYAATIEVRNNCPYTVWAA  | Negative |
| P12670 | RNNCPYTVWAASTPIGGGRR  | Negative |
| P12670 | TSSFVLFFLLCVTYTYAATI  | Negative |
| P12670 | LFLLCVTYTYAATIEVRNN   | Negative |
| P12670 | EVRNNCPYTVWAASTPIGGG  | Negative |
| P12670 | GYLTSSFVLFFLLCVTYTYA  | Negative |
| P12670 | LCVTYTYAATIEVRNNCPYT  | Negative |
| P12670 | VTYTYAATIEVRNNCPYTVW  | Negative |
| P12670 | AATIEVRNNCPYTVWAASTP  | Negative |
| P12670 | TIEVRNNCPYTVWAASTPIG  | Negative |
| P12670 | SSFVLFFLLCVTYTYAATIE  | Negative |
| P12670 | VRNNCPYTVWAASTPIGGGR  | Negative |
| P12670 | TYTYAATIEVRNNCPYTVWA  | Negative |
| P12670 | FLLCVTYTYAATIEVRNNCP  | Negative |
| P12706 | QCLPLVLVLFFSTPNTEALV  | Negative |
| P12706 | FSTPNTEALVNQHLCGSHLV  | Negative |
| P12706 | LWMQCLPLVLVLFFSTPNTE  | Negative |
| P12706 | EALVNQHLCGSHLVEALYLV  | Negative |
| P12706 | CLPLVLVLFFSTPNTEALVN  | Negative |
| P12706 | VNQHLCGSHLVEALYLVCGD  | Negative |
| P12706 | MQCLPLVLVLFFSTPNTEAL  | Negative |
| P12706 | LVLVLFFSTPNTEALVNQHL  | Negative |
| P12706 | WMQCLPLVLVLFFSTPNTEA  | Negative |
| P12706 | VLFFSTPNTEALVNQHLCGS  | Negative |
| P12706 | HLCGSHLVEALYLVCGDRGF  | Negative |
| P12706 | TEALVNQHLCGSHLVEALYL  | Negative |
| P12706 | QHLCGSHLVEALYLVCGDRG  | Negative |
| P12706 | ALVNQHLCGSHLVEALYLV   | Negative |
| P12706 | STPNTEALVNQHLCGSHLVE  | Negative |
| P12706 | PNTEALVNQHLCGSHLVEAL  | Negative |
| P12706 | FFSTPNTEALVNQHLCGSHL  | Negative |
| P12706 | ALWMQCLPLVLVLFFSTPNT  | Negative |
| P12706 | VLVLFFSTPNTEALVNQHLC  | Negative |
| P12706 | TPNTEALVNQHLCGSHLVEA  | Negative |
| P12706 | NTEALVNQHLCGSHLVEALY  | Negative |
| P12706 | LFSTPNTEALVNQHLCGSH   | Negative |
| P12706 | LPLVLVLFFSTPNTEALVNQ  | Negative |
| P12706 | MALWMQCLPLVLVLFFSTPN  | Negative |



|        |                      |          |
|--------|----------------------|----------|
| P12706 | NQHLCGSHLVEALYLVCGR  | Negative |
| P12706 | LCGSHLVEALYLVCGRGFF  | Negative |
| P12706 | CGSHLVEALYLVCGRGFFY  | Negative |
| P12706 | LVNQHLCGSHLVEALYLVC  | Negative |
| P12706 | LVLFFSTPNTEALVNQHLCG | Negative |
| P12707 | LWMQCLPLVLVLLFSTPNTE | Negative |
| P12707 | ANQHLCGSHLVEALYLVCGR | Negative |
| P12707 | LLFSTPNTEALANQHLCGSH | Negative |
| P12707 | NQHLCGSHLVEALYLVCGR  | Negative |
| P12707 | WMQCLPLVLVLLFSTPNTEA | Negative |
| P12707 | LPLVLVLLFSTPNTEALANQ | Negative |
| P12707 | CGSHLVEALYLVCGRGFFY  | Negative |
| P12707 | MALWMQCLPLVLVLLFSTPN | Negative |
| P12707 | LVLVLLFSTPNTEALANQHL | Negative |
| P12707 | NTEALANQHLCGSHLVEALY | Negative |
| P12707 | LFSTPNTEALANQHLCGSHL | Negative |
| P12707 | PNTEALANQHLCGSHLVEAL | Negative |
| P12707 | EALANQHLCGSHLVEALYLV | Negative |
| P12707 | TPNTEALANQHLCGSHLVEA | Negative |
| P12707 | CLPLVLVLLFSTPNTEALAN | Negative |
| P12707 | TEALANQHLCGSHLVEALYL | Negative |
| P12707 | VLVLLFSTPNTEALANQHLC | Negative |
| P12707 | STPNTEALANQHLCGSHLVE | Negative |
| P12707 | LANQHLCGSHLVEALYLVC  | Negative |
| P12707 | ALANQHLCGSHLVEALYLV  | Negative |
| P12707 | HLCGSHLVEALYLVCGRGF  | Negative |
| P12707 | QCLPLVLVLLFSTPNTEALA | Negative |
| P12707 | QHLCGSHLVEALYLVCGRG  | Negative |
| P12707 | FSTPNTEALANQHLCGSHLV | Negative |
| P12707 | ALWMQCLPLVLVLLFSTPNT | Negative |
| P12707 | VLLFSTPNTEALANQHLCGS | Negative |
| P12707 | MQCLPLVLVLLFSTPNTEAL | Negative |
| P12707 | LCGSHLVEALYLVCGRGFF  | Negative |
| P12707 | LVLLFSTPNTEALANQHLCG | Negative |
| P12724 | SLHARPPQFTRAQWFAIQHI | Negative |
| P12724 | LLGLMGVEGSLHARPPQFTR | Negative |
| P12724 | EGSLHARPPQFTRAQWFAIQ | Negative |
| P12724 | HARPPQFTRAQWFAIQHISL | Negative |
| P12724 | CLLLLGLMGVEGSLHARPP  | Negative |
| P12724 | ICLLLLGLMGVEGSLHARP  | Negative |
| P12724 | LLLLGLMGVEGSLHARPPQ  | Negative |
| P12724 | ARPPQFTRAQWFAIQHISLN | Negative |
| P12724 | KLFTSQICLLLLLGLMGVEG | Negative |
| P12724 | SQICLLLLLGLMGVEGSLHA | Negative |
| P12724 | PKLFTSQICLLLLLGLMGVE | Negative |
| P12724 | GSLHARPPQFTRAQWFAIQH | Negative |

|        |                       |          |
|--------|-----------------------|----------|
| P12724 | VEGSLHARPPQFTRAQWFAI  | Negative |
| P12724 | MGVEGSLHARPPQFTRAQWF  | Negative |
| P12724 | PQFTRAQWFAIQHISLNPPR  | Negative |
| P12724 | GVEGSLHARPPQFTRAQWFA  | Negative |
| P12724 | LHARPPQFTRAQWFAIQHIS  | Negative |
| P12724 | GLMGVEGSLHARPPQFTRAQ  | Negative |
| P12724 | PPQFTRAQWFAIQHISLNPP  | Negative |
| P12724 | MVPKLFTSQICLLLLLGLMG  | Negative |
| P12724 | LLLGLMGVEGSLHARPPQFT  | Negative |
| P12724 | TSQICLLLLLGLMGVEGSLH  | Negative |
| P12724 | FTSQICLLLLLGLMGVEGSL  | Negative |
| P12724 | VPKLFTSQICLLLLLGLMGV  | Negative |
| P12724 | RPPQFTRAQWFAIQHISLNP  | Negative |
| P12724 | LFTSQICLLLLLGLMGVEGS  | Negative |
| P12724 | LMGVEGSLHARPPQFTRAQW  | Negative |
| P12724 | QICLLLLLGLMGVEGSLHAR  | Negative |
| P12724 | LGLMGVEGSLHARPPQFTRA  | Negative |
| P12725 | GLLLAALCCLAPTSLAGVL   | Negative |
| P12725 | LQGHAVQETDDTAHQEAACH  | Negative |
| P12725 | LAGVLQGHAVQETDDTAHQE  | Negative |
| P12725 | LLLLAALCCLAPTSLAGVLQ  | Negative |
| P12725 | AGVLQGHAVQETDDTAHQEA  | Negative |
| P12725 | ALCCLAPTSLAGVLQGHAVQ  | Negative |
| P12725 | TRGLLLAALCCLAPTSLAG   | Negative |
| P12725 | LLAALCCLAPTSLAGVLQGH  | Negative |
| P12725 | ALSITRGLLLAALCCLAPT   | Negative |
| P12725 | GHAVQETDDTAHQEAACHKI  | Negative |
| P12725 | AALCCLAPTSLAGVLQGHAV  | Negative |
| P12725 | PTSLAGVLQGHAVQETDDTA  | Negative |
| P12725 | LSITRGLLLAALCCLAPTS   | Negative |
| P12725 | RGLLLAALCCLAPTSLAGV   | Negative |
| P12725 | LCCLAPTSLAGVLQGHAVQE  | Negative |
| P12725 | LAALCCLAPTSLAGVLQGHA  | Negative |
| P12725 | APTSLAGVLQGHAVQETDDT  | Negative |
| P12725 | SITRGLLLAALCCLAPTS    | Negative |
| P12725 | HAVQETDDTAHQEAACHKIA  | Negative |
| P12725 | SLAGVLQGHAVQETDDTAHQ  | Negative |
| P12725 | QGHAVQETDDTAHQEAACHK  | Negative |
| P12725 | LAPTSLAGVLQGHAVQETDD  | Negative |
| P12725 | TSLAGVLQGHAVQETDDTAH  | Negative |
| P12725 | ITRGLLLAALCCLAPTSLA   | Negative |
| P12725 | CLAPTSLAGVLQGHAVQETD  | Negative |
| P12725 | GVLQGHAVQETDDTAHQEAA  | Negative |
| P12725 | CCLAPTSLAGVLQGHAVQET  | Negative |
| P12725 | MALSITRGLLLAALCCLAP   | Negative |
| P12725 | VLQGHAVQETDDTAHQEAAAC | Negative |

|        |                       |          |
|--------|-----------------------|----------|
| P12729 | DYFTTTLANQNPPVCASVDVI | Negative |
| P12729 | NAYDYFTTTLANQNPPVCASV | Negative |
| P12729 | MKFQHTFIALLSLLTYANAY  | Negative |
| P12729 | NQNPPVCASVDVIQNVCTEVC | Negative |
| P12729 | YANAYDYFTTTLANQNPPVCA | Negative |
| P12729 | TTTLANQNPPVCASVDVIQNV | Negative |
| P12729 | YDYFTTTLANQNPPVCASVDV | Negative |
| P12729 | TLANQNPPVCASVDVIQNVCT | Negative |
| P12729 | LLSLLTYANAYDYFTTTLAN  | Negative |
| P12729 | TTLANQNPPVCASVDVIQNV  | Negative |
| P12729 | IALLSLLTYANAYDYFTTTL  | Negative |
| P12729 | QHTFIALLSLLTYANAYDYF  | Negative |
| P12729 | FTTTLANQNPPVCASVDVIQN | Negative |
| P12729 | LLTYANAYDYFTTTLANQNP  | Negative |
| P12729 | FIALLSLLTYANAYDYFTTT  | Negative |
| P12729 | ANAYDYFTTTLANQNPPVCAS | Negative |
| P12729 | LANQNPPVCASVDVIQNVCTE | Negative |
| P12729 | LSLLTYANAYDYFTTTLANQ  | Negative |
| P12729 | SLLTYANAYDYFTTTLANQN  | Negative |
| P12729 | ANQNPPVCASVDVIQNVCTEV | Negative |
| P12729 | ALLSLLTYANAYDYFTTTLA  | Negative |
| P12729 | FQHTFIALLSLLTYANAYDY  | Negative |
| P12729 | QNPVCASVDVIQNVCTEVCG  | Negative |
| P12729 | TYANAYDYFTTTLANQNPPVC | Negative |
| P12729 | TFIALLSLLTYANAYDYFTT  | Negative |
| P12729 | LTYANAYDYFTTTLANQNPV  | Negative |
| P12729 | KFQHTFIALLSLLTYANAYD  | Negative |
| P12729 | YFTTTLANQNPPVCASVDVIQ | Negative |
| P12729 | AYDYFTTTLANQNPPVCASVD | Negative |
| P12763 | AGYKEPACDDPDTEQAALAA  | Negative |
| P12763 | KEPACDDPDTEQAALAAVDY  | Negative |
| P12763 | LFCLAQLWGCHSIPLDPVAG  | Negative |
| P12763 | PACDDPDTEQAALAAVDYIN  | Negative |
| P12763 | SFVLLFCLAQLWGCHSIPLD  | Negative |
| P12763 | KSFVLLFCLAQLWGCHSIPL  | Negative |
| P12763 | PLDPVAGYKEPACDDPDTEQ  | Negative |
| P12763 | LDPVAGYKEPACDDPDTEQA  | Negative |
| P12763 | CHSIPLDPVAGYKEPACDDP  | Negative |
| P12763 | WGCHSIPLDPVAGYKEPACD  | Negative |
| P12763 | LWGCHSIPLDPVAGYKEPAC  | Negative |
| P12763 | GYKEPACDDPDTEQAALAAV  | Negative |
| P12763 | AQLWGCHSIPLDPVAGYKEP  | Negative |
| P12763 | MKSFVLLFCLAQLWGCHSIP  | Negative |
| P12763 | SIPLDPVAGYKEPACDDPDT  | Negative |
| P12763 | DPVAGYKEPACDDPDTEQAA  | Negative |
| P12763 | IPLDPVAGYKEPACDDPDTE  | Negative |

|        |                       |          |
|--------|-----------------------|----------|
| P12763 | EPACDDPDTEQAALAAVDYI  | Negative |
| P12763 | QLWGCHSIPLDPVAGYKEPA  | Negative |
| P12763 | VLLFCLAQLWGCHSIPLDPV  | Negative |
| P12763 | PVAGYKEPACDDPDTEQAAL  | Negative |
| P12763 | YKEPACDDPDTEQAALAAVD  | Negative |
| P12763 | FCLAQLWGCHSIPLDPVAGY  | Negative |
| P12763 | CLAQLWGCHSIPLDPVAGYK  | Negative |
| P12763 | LAQLWGCHSIPLDPVAGYKE  | Negative |
| P12763 | VAGYKEPACDDPDTEQAALA  | Negative |
| P12763 | LLFCLAQLWGCHSIPLDPVA  | Negative |
| P12763 | HSIPLDPVAGYKEPACDDPD  | Negative |
| P12763 | GCHSIPLDPVAGYKEPACDD  | Negative |
| P12799 | SHPPSVIFYILSLLSSACLA  | Negative |
| P12799 | SSHPPSVIFYILSLLSSACL  | Negative |
| P12799 | CLAYVATRDNCCILDERFGS  | Negative |
| P12799 | TRDNCCILDERFGSYCPTTC  | Negative |
| P12799 | RDNCCILDERFGSYCPTTCG  | Negative |
| P12799 | MSWSSHPPSVIFYILSLLSS  | Negative |
| P12799 | WSSHPPSVIFYILSLLSSAC  | Negative |
| P12799 | IFYILSLLSSACLAYVATRD  | Negative |
| P12799 | SWSSHPPSVIFYILSLLSSA  | Negative |
| P12799 | LLSSACLAYVATRDNCCILD  | Negative |
| P12799 | SSACLAYVATRDNCCILDER  | Negative |
| P12799 | ATRDNCCILDERFGSYCPTT  | Negative |
| P12799 | HPPSVIFYILSLLSSACLAY  | Negative |
| P12799 | VATRDNCCILDERFGSYCPT  | Negative |
| P12799 | ACLAYVATRDNCCILDERFG  | Negative |
| P12799 | LSSACLAYVATRDNCCILDE  | Negative |
| P12799 | YILSLLSSACLAYVATRDNC  | Negative |
| P12799 | SVIFYILSLLSSACLAYVAT  | Negative |
| P12799 | LAYVATRDNCCILDERFGSY  | Negative |
| P12799 | FYILSLLSSACLAYVATRDN  | Negative |
| P12799 | AYVATRDNCCILDERFGSYC  | Negative |
| P12799 | DNCCILDERFGSYCPTTCGI  | Negative |
| P12799 | SLLSSACLAYVATRDNCCIL  | Negative |
| P12799 | LSLLSSACLAYVATRDNCCI  | Negative |
| P12799 | PPSVIFYILSLLSSACLAYV  | Negative |
| P12799 | SACLAYVATRDNCCILDERF  | Negative |
| P12799 | PSVIFYILSLLSSACLAYVA  | Negative |
| P12799 | ILSLLSSACLAYVATRDNCC  | Negative |
| P12799 | YVATRDNCCILDERFGSYCP  | Negative |
| P12820 | MGAASGRRSPPLLPLLLLL   | Negative |
| P12820 | LLPLLLLLLPPPPVILELDP  | Negative |
| P12820 | LLLLLPPPPVILELDPALQP  | Negative |
| P12820 | LDPALQPGNFPADDEAGAQIF | Negative |
| P12820 | RRSPPLLPLLLLLLPPPPV   | Negative |

|        |                      |          |
|--------|----------------------|----------|
| P12820 | PPPPVILELDPALQPGNFPA | Negative |
| P12820 | GRRSPPLLLPLLLLLLPPPP | Negative |
| P12820 | PLLLLLLPPPPVILELDPAL | Negative |
| P12820 | LPPPPVILELDPALQPGNFP | Negative |
| P12820 | LLPPPPVILELDPALQPGNF | Negative |
| P12820 | ILELDPALQPGNFPADEAGA | Negative |
| P12820 | VILELDPALQPGNFPADEAG | Negative |
| P12820 | AASGRRSPPLLLPLLLLLLP | Negative |
| P12820 | PLLLPLLLLLLPPPPVILEL | Negative |
| P12820 | RSPPLLLPLLLLLLPPPPVI | Negative |
| P12820 | PPPVILELDPALQPGNFPAD | Negative |
| P12820 | ELDPALQPGNFPADEAGAQI | Negative |
| P12820 | PPLLLPLLLLLLPPPPVILE | Negative |
| P12820 | GAASGRRSPPLLLPLLLLLL | Negative |
| P12820 | LLLPPPPVILELDPALQPGN | Negative |
| P12820 | LELDPALQPGNFPADEAGAQ | Negative |
| P12820 | SPPLLLPLLLLLLPPPPVIL | Negative |
| P12820 | LLLPPPPVILELDPALQPG  | Negative |
| P12820 | LLLLLLPPPPVILELDPALQ | Negative |
| P12820 | SGRRSPPLLLPLLLLLLPPP | Negative |
| P12820 | PPVILELDPALQPGNFPADE | Negative |
| P12820 | PVILELDPALQPGNFPADEA | Negative |
| P12820 | ASGRRSPPLLLPLLLLLLPP | Negative |
| P12820 | LLPLLLLLLPPPPVILELD  | Negative |
| P12843 | RLGGPALPLLLPSLLLLLLL | Negative |
| P12843 | GPGVRAEVLFRCPCTPERL  | Negative |
| P12843 | GGCGPGVRAEVLFRCPCTP  | Negative |
| P12843 | LLLLLLGAGGCGPGVRAEVL | Negative |
| P12843 | LGAGGCGPGVRAEVLFRCP  | Negative |
| P12843 | PALPLLLPSLLLLLLLGAGG | Negative |
| P12843 | PRLGGPALPLLLPSLLLLLL | Negative |
| P12843 | LLLLLLLGAGGCGPGVRAEV | Negative |
| P12843 | LLPSLLLLLLLGAGGCGPG  | Negative |
| P12843 | PGVRAEVLFRCPCTPERLA  | Negative |
| P12843 | CGPGVRAEVLFRCPCTPER  | Negative |
| P12843 | GGPALPLLLPSLLLLLLLGA | Negative |
| P12843 | LGGPALPLLLPSLLLLLLLG | Negative |
| P12843 | ALPLLLPSLLLLLLLGAGGC | Negative |
| P12843 | MLPRLGGPALPLLLPSLLLL | Negative |
| P12843 | GPALPLLLPSLLLLLLLGAG | Negative |
| P12843 | AGGCGPGVRAEVLFRCPCT  | Negative |
| P12843 | PSLLLLLLLGAGGCGPGVRA | Negative |
| P12843 | LLLGAGGCGPGVRAEVLFR  | Negative |
| P12843 | GCGPGVRAEVLFRCPCTPE  | Negative |
| P12843 | SLLLLLLLGAGGCGPGVRAE | Negative |
| P12843 | LPSLLLLLLLGAGGCGPGVR | Negative |

|        |                      |          |
|--------|----------------------|----------|
| P12843 | LPLLLPSLLLLLLLGAGGCG | Negative |
| P12843 | GAGGCGPGVRAEVLFRCP   | Negative |
| P12843 | LLGAGGCGPGVRAEVLFRCP | Negative |
| P12843 | PLLLPSLLLLLLLGAGGCGP | Negative |
| P12843 | LPRLGGPALPLLLPSLLLLL | Negative |
| P12843 | LLLLLGAGGCGPGVRAEVL  | Negative |
| P12843 | LLPSLLLLLLLGAGGCGPGV | Negative |
| P12872 | MLASQTEAFVPIFTYGELQR | Negative |
| P12872 | VPIFTYGELQRMQEKERNKG | Negative |
| P12872 | VVHVAAMLASQTEAFVPIFT | Negative |
| P12872 | TEAFVPIFTYGELQRMQEKE | Negative |
| P12872 | QTEAFVPIFTYGELQRMQEK | Negative |
| P12872 | MVSRKAVAALLVVHVAAMLA | Negative |
| P12872 | ALLVVHVAAMLASQTEAFVP | Negative |
| P12872 | LLVVHVAAMLASQTEAFVPI | Negative |
| P12872 | VSRKAVAALLVVHVAAMLAS | Negative |
| P12872 | AAMLASQTEAFVPIFTYGEL | Negative |
| P12872 | AALLVVHVAAMLASQTEAFV | Negative |
| P12872 | RKAVAALLVVHVAAMLASQT | Negative |
| P12872 | IFTYGELQRMQEKERNKGQK | Negative |
| P12872 | KAVAALLVVHVAAMLASQTE | Negative |
| P12872 | SRKAVAALLVVHVAAMLASQ | Negative |
| P12872 | AMLASQTEAFVPIFTYGELQ | Negative |
| P12872 | AVAALLVVHVAAMLASQTEA | Negative |
| P12872 | VAALLVVHVAAMLASQTEAF | Negative |
| P12872 | HVAAMLASQTEAFVPIFTYG | Negative |
| P12872 | LASQTEAFVPIFTYGELQRM | Negative |
| P12872 | FVPIFTYGELQRMQEKERNK | Negative |
| P12872 | ASQTEAFVPIFTYGELQRMQ | Negative |
| P12872 | VAAMLASQTEAFVPIFTYGE | Negative |
| P12872 | VHVAAMLASQTEAFVPIFTY | Negative |
| P12872 | PIFTYGELQRMQEKERNKGQ | Negative |
| P12872 | FTYGELQRMQEKERNKGQK  | Negative |
| P12872 | SQTEAFVPIFTYGELQRMQE | Negative |
| P12872 | EAFVPIFTYGELQRMQEKER | Negative |
| P12872 | AFVPIFTYGELQRMQEKERN | Negative |
| P12903 | ALALSSTAALADTTTVNGGT | Negative |
| P12903 | AALADTTTVNGGTVHFKGEV | Negative |
| P12903 | LAMIVVSALALSSTAALADT | Negative |
| P12903 | DTTTVNGGTVHFKGEVVNA  | Negative |
| P12903 | TLAMIVVSALALSSTAALAD | Negative |
| P12903 | VNGGTVHFKGEVVNAACAVD | Negative |
| P12903 | VSALALSSTAALADTTTVNG | Negative |
| P12903 | ALADTTTVNGGTVHFKGEV  | Negative |
| P12903 | TAALADTTTVNGGTVHFKGE | Negative |
| P12903 | SALALSSTAALADTTTVNGG | Negative |

|        |                      |          |
|--------|----------------------|----------|
| P12903 | TTVNGGTVHFKGEVVNAACA | Negative |
| P12903 | KTLAMIVVSALALSSTAALA | Negative |
| P12903 | ADTTTVNGGTVHFKGEVVNA | Negative |
| P12903 | GGTVHFKGEVVNAACAVDAG | Negative |
| P12903 | ALSSTAALADTTTVNGGTVH | Negative |
| P12903 | LSSTAALADTTTVNGGTVHF | Negative |
| P12903 | TTTVNGGTVHFKGEVVNAAC | Negative |
| P12903 | AMIVVSALALSSTAALADTT | Negative |
| P12903 | SSTAALADTTTVNGGTVHFK | Negative |
| P12903 | KIKTLAMIVVSALALSSTAA | Negative |
| P12903 | LADTTTVNGGTVHFKGEVVN | Negative |
| P12903 | STAALADTTTVNGGTVHFKG | Negative |
| P12903 | VVSALALSSTAALADTTVN  | Negative |
| P12903 | MIVVSALALSSTAALADTTT | Negative |
| P12903 | LALSSTAALADTTTVNGGTV | Negative |
| P12903 | MKIKTLAMIVVSALALSSTA | Negative |
| P12903 | TVNGGTVHFKGEVVNAACAV | Negative |
| P12903 | IKTLAMIVVSALALSSTAAL | Negative |
| P12903 | NGGTVHFKGEVVNAACAVDA | Negative |
| P12943 | AMGMGPAFAPKVAEALTAKK | Negative |
| P12943 | AVAMGMGPAFAPKVAEALTA | Negative |
| P12943 | RPSVVYLHNAECTGCSESL  | Negative |
| P12943 | KVAEALTAKKRPSVVYLHNA | Negative |
| P12943 | MKFCTAVAVAMGMGPAFAPK | Negative |
| P12943 | FCTAVAVAMGMGPAFAPKVA | Negative |
| P12943 | VAVAMGMGPAFAPKVAEALT | Negative |
| P12943 | KKRPSVVYLHNAECTGCSES | Negative |
| P12943 | MGPAFAPKVAEALTAKKRPS | Negative |
| P12943 | AVAVAMGMGPAFAPKVAEAL | Negative |
| P12943 | AFAPKVAEALTAKKRPSVVY | Negative |
| P12943 | APKVAEALTAKKRPSVVYLH | Negative |
| P12943 | TAVAVAMGMGPAFAPKVAEA | Negative |
| P12943 | KRPSVVYLHNAECTGCSESL | Negative |
| P12943 | VAEALTAKKRPSVVYLHNAE | Negative |
| P12943 | TAKKRPSVVYLHNAECTGCS | Negative |
| P12943 | KFCTAVAVAMGMGPAFAPKV | Negative |
| P12943 | CTAVAVAMGMGPAFAPKVAE | Negative |
| P12943 | AEALTAKKRPSVVYLHNAEC | Negative |
| P12943 | FAPKVAEALTAKKRPSVVYL | Negative |
| P12943 | ALTAKKRPSVVYLHNAECTG | Negative |
| P12943 | LTAKKRPSVVYLHNAECTGC | Negative |
| P12943 | PKVAEALTAKKRPSVVYLHN | Negative |
| P12943 | GPAFAPKVAEALTAKKRPSV | Negative |
| P12943 | MGMGPAFAPKVAEALTAKKR | Negative |
| P12943 | GMGPAFAPKVAEALTAKKRP | Negative |
| P12943 | AKKRPSVVYLHNAECTGCSE | Negative |

|        |                       |          |
|--------|-----------------------|----------|
| P12943 | PAFAPKVAEALTAKKRPSVV  | Negative |
| P12943 | EALTAKKRPSVVYLHNAECT  | Negative |
| P12992 | LALAFLLHACTALAWQETNS  | Negative |
| P12992 | TALAWQETNSRSVVAHLDSG  | Negative |
| P12992 | SRSVVAHLDSGIIRGVPRSA  | Negative |
| P12992 | VAHLDSGIIRGVPRSADGIK  | Negative |
| P12992 | ACTALAWQETNSRSVVAHLD  | Negative |
| P12992 | SHVLALAFLLHACTALAWQE  | Negative |
| P12992 | ALAWQETNSRSVVAHLDSGI  | Negative |
| P12992 | ALAFLLHACTALAWQETNSR  | Negative |
| P12992 | CTALAWQETNSRSVVAHLDS  | Negative |
| P12992 | NSRSVVAHLDSGIIRGVPRS  | Negative |
| P12992 | HACTALAWQETNSRSVVAHL  | Negative |
| P12992 | LAWQETNSRSVVAHLDSGII  | Negative |
| P12992 | LAFLHACTALAWQETNSRS   | Negative |
| P12992 | SVVAHLDSGIIRGVPRSADG  | Negative |
| P12992 | TNSRSVVAHLDSGIIRGVPR  | Negative |
| P12992 | LLHACTALAWQETNSRSVVA  | Negative |
| P12992 | LHACTALAWQETNSRSVVAH  | Negative |
| P12992 | VVAHLDSGIIRGVPRSADGI  | Negative |
| P12992 | TSHVLALAFLLHACTALAWQ  | Negative |
| P12992 | AHLDSGIIRGVPRSADGIKF  | Negative |
| P12992 | FLLHACTALAWQETNSRSVV  | Negative |
| P12992 | WQETNSRSVVAHLDSGIIRG  | Negative |
| P12992 | RSVVAHLDSGIIRGVPRSAD  | Negative |
| P12992 | HVLALAFLLHACTALAWQET  | Negative |
| P12992 | ETNSRSVVAHLDSGIIRGVP  | Negative |
| P12992 | QETNSRSVVAHLDSGIIRGV  | Negative |
| P12992 | AFLHACTALAWQETNSRSV   | Negative |
| P12992 | MTSHVLALAFLLHACTALAW  | Negative |
| P12992 | AWQETNSRSVVAHLDSGIIR  | Negative |
| P12993 | TTSPVLNGSEKSEEINEKDL  | Negative |
| P12993 | KSEEINEKDLRKKSELQRNA  | Negative |
| P12993 | FILLFIALTLTTSPLVNGS   | Negative |
| P12993 | FIALTLTTSPLVNGSEKSEE  | Negative |
| P12993 | NGSEKSEEINEKDLRKKSEL  | Negative |
| P12993 | TLTTSPLVNGSEKSEEINEK  | Negative |
| P12993 | MKKTAFILLFIALTLTTSP   | Negative |
| P12993 | SEKSEEINEKDLRKKSELQR  | Negative |
| P12993 | LTTSPVLNGSEKSEEINEKD  | Negative |
| P12993 | EEINEKDLRKKSELQRNALS  | Negative |
| P12993 | KTAFILLFIALTLTTSPLV   | Negative |
| P12993 | LVNGSEKSEEINEKDLRKKKS | Negative |
| P12993 | LLFIALTLTTSPLVNGSEK   | Negative |
| P12993 | SEEINEKDLRKKSELQRNAL  | Negative |
| P12993 | GSEKSEEINEKDLRKKSELQ  | Negative |



|        |                       |          |
|--------|-----------------------|----------|
| P12993 | KKTAFILLLFIALTLTTSPL  | Negative |
| P12993 | IALTLTTSPLVNGSEKSEEI  | Negative |
| P12993 | TSPLVNGSEKSEEINEKDLR  | Negative |
| P12993 | TAFILLLFIALTLTTSPLVN  | Negative |
| P12993 | ILLLFIALTLTTSPLVNGSE  | Negative |
| P12993 | EINEKDLRKKSELQRNALSN  | Negative |
| P12993 | VNGSEKSEEINEKDLRKKSE  | Negative |
| P12993 | SPLVNGSEKSEEINEKDLRK  | Negative |
| P12993 | PLVNGSEKSEEINEKDLRKK  | Negative |
| P12993 | EKSEEINEKDLRKKSELQRN  | Negative |
| P12993 | LTLTTSPLVNGSEKSEEINE  | Negative |
| P12993 | LLFIALTLTTSPLVNGSEKS  | Negative |
| P12993 | AFILLLFIALTLTTSPLVNG  | Negative |
| P13036 | RLSLLPLAGLSFSFAAAQVN  | Negative |
| P13036 | GLSFSFAAAQVNIAPGSLDK  | Negative |
| P13036 | TPLVNTIRLSLLPLAGLSFS  | Negative |
| P13036 | VFRKTTPLVNTIRLSLLPLA  | Negative |
| P13036 | NTIRLSLLPLAGLSFSFAAA  | Negative |
| P13036 | TPLRVFRKTTPLVNTIRLSL  | Negative |
| P13036 | IRLSLLPLAGLSFSFAAAQV  | Negative |
| P13036 | FRKTTPLVNTIRLSLLPLAG  | Negative |
| P13036 | MTPLRVFRKTTPLVNTIRLS  | Negative |
| P13036 | FSAFAAQVNIAPGSLDKALN  | Negative |
| P13036 | PLVNTIRLSLLPLAGLSFSA  | Negative |
| P13036 | KTTPLVNTIRLSLLPLAGLS  | Negative |
| P13036 | PLRVFRKTTPLVNTIRLSLL  | Negative |
| P13036 | LVNTIRLSLLPLAGLSFSFAF | Negative |
| P13036 | TTPLVNTIRLSLLPLAGLSF  | Negative |
| P13036 | LPLAGLSFSFAAAQVNIAPG  | Negative |
| P13036 | RKTTPLVNTIRLSLLPLAGL  | Negative |
| P13036 | LAGLSFSFAAAQVNIAPGSL  | Negative |
| P13036 | AGLSFSFAAAQVNIAPGSLD  | Negative |
| P13036 | RVFRKTTPLVNTIRLSLLPL  | Negative |
| P13036 | SLLPLAGLSFSFAAAQVNIA  | Negative |
| P13036 | LRVFRKTTPLVNTIRLSLLP  | Negative |
| P13036 | LLPLAGLSFSFAAAQVNIAP  | Negative |
| P13036 | LSFSFAAAQVNIAPGSLDKA  | Negative |
| P13036 | TIRLSLLPLAGLSFSFAAAQ  | Negative |
| P13036 | VNTIRLSLLPLAGLSFSFAFA | Negative |
| P13036 | SFSFAAAQVNIAPGSLDKAL  | Negative |
| P13036 | PLAGLSFSFAAAQVNIAPGS  | Negative |
| P13036 | SAFAAQVNIAPGSLDKALNQ  | Negative |
| P13083 | APLEPVYPGDDATPQQMAQY  | Negative |
| P13083 | LWLLLLGTCMALLLPEAWGA  | Negative |
| P13083 | LPEAWGAPLEPVYPGDDATP  | Negative |
| P13083 | LLLPEAWGAPLEPVYPGDDA  | Negative |

|        |                      |          |
|--------|----------------------|----------|
| P13083 | MTATRCCLWLLLLGTCMALL | Negative |
| P13083 | LLLGTCMALLLPEAWGAPLE | Negative |
| P13083 | TRCCLWLLLLGTCMALLLPE | Negative |
| P13083 | LLPEAWGAPLEPVYPGDDAT | Negative |
| P13083 | LEPVYPGDDATPQQMAQYAA | Negative |
| P13083 | LGTCMALLLPEAWGAPLEPV | Negative |
| P13083 | PLEPVYPGDDATPQQMAQYA | Negative |
| P13083 | GTCMALLLPEAWGAPLEPVY | Negative |
| P13083 | TCMALLLPEAWGAPLEPVYP | Negative |
| P13083 | EPVYPGDDATPQQMAQYAAE | Negative |
| P13083 | RCCLWLLLLGTCMALLLPEA | Negative |
| P13083 | GAPLEPVYPGDDATPQQMAQ | Negative |
| P13083 | WLLLLGTCMALLLPEAWGAP | Negative |
| P13083 | TATRCCLWLLLLGTCMALLL | Negative |
| P13083 | AWGAPLEPVYPGDDATPQQM | Negative |
| P13083 | ALLLPEAWGAPLEPVYPGDD | Negative |
| P13083 | PEAWGAPLEPVYPGDDATPQ | Negative |
| P13083 | ATRCCLWLLLLGTCMALLLP | Negative |
| P13083 | CMALLLPEAWGAPLEPVYPG | Negative |
| P13083 | CCLWLLLLGTCMALLLPEAW | Negative |
| P13083 | LLLLGTCMALLLPEAWGAPL | Negative |
| P13083 | MALLLPEAWGAPLEPVYPGD | Negative |
| P13083 | WGAPLEPVYPGDDATPQQMA | Negative |
| P13083 | CLWLLLLGTCMALLLPEAWG | Negative |
| P13083 | EAWGAPLEPVYPGDDATPQQ | Negative |
| P13087 | FFFVSALLAAAANPLLSAAD | Negative |
| P13087 | KELTMLSLSFFFVSALLAAA | Negative |
| P13087 | LSAADSAPNPVLDIDGEKLR | Negative |
| P13087 | SLSFFFVSALLAAAANPLLS | Negative |
| P13087 | SAADSAPNPVLDIDGEKLRT | Negative |
| P13087 | AAAANPLLSAADSAPNPVLD | Negative |
| P13087 | NPLLSAADSAPNPVLDIDGE | Negative |
| P13087 | LSLSFFFVSALLAAAANPLL | Negative |
| P13087 | FVSALLAAAANPLLSAADSA | Negative |
| P13087 | MLSLSFFFVSALLAAAANPL | Negative |
| P13087 | LSFFFVSALLAAAANPLLSA | Negative |
| P13087 | TMLSLSFFFVSALLAAAANP | Negative |
| P13087 | FFVSALLAAAANPLLSAADS | Negative |
| P13087 | SFFFVSALLAAAANPLLSAA | Negative |
| P13087 | VSALLAAAANPLLSAADSAP | Negative |
| P13087 | AAANPLLSAADSAPNPVLDI | Negative |
| P13087 | ELTMLSLSFFFVSALLAAA  | Negative |
| P13087 | LLSAADSAPNPVLDIDGEKL | Negative |
| P13087 | AANPLLSAADSAPNPVLDID | Negative |
| P13087 | LTMLSLSFFFVSALLAAAAN | Negative |
| P13087 | LLAAAANPLLSAADSAPNPV | Negative |

|        |                       |          |
|--------|-----------------------|----------|
| P13087 | AADSAPNPVLDIDGKLRGTG  | Negative |
| P13087 | LAAAANPLLSAADSAPNPVL  | Negative |
| P13087 | MKELTMLSLSFFFVSALLAA  | Negative |
| P13087 | DSAPNPVLDIDGKLRGTGN   | Negative |
| P13087 | PLLSAADSAPNPVLDIDGK   | Negative |
| P13087 | ANPLLSAADSAPNPVLDIDG  | Negative |
| P13087 | ALLAAAANPLLSAADSAPNP  | Negative |
| P13087 | ADSAPNPVLDIDGKLRGTG   | Negative |
| P13113 | AAVVAPVWAATQTVTLSPVG  | Negative |
| P13113 | AIAAVVAPVWAATQTVTLSPV | Negative |
| P13113 | MKKLFASLAIAAVVAPVWAA  | Negative |
| P13113 | APVWAATQTVTLSPVGMTCS  | Negative |
| P13113 | AATQTVTLSPVGMTCSACPI  | Negative |
| P13113 | VPGMTCSACPITVKKAIKSV  | Negative |
| P13113 | VTLSVPGMTCSACPITVKKAA | Negative |
| P13113 | LFASLAIAAVVAPVWAATQT  | Negative |
| P13113 | TLSPVPGMTCSACPITVKKAI | Negative |
| P13113 | ASLAIAAVVAPVWAATQTVT  | Negative |
| P13113 | TQTVTLSPVPGMTCSACPITV | Negative |
| P13113 | KKLFASLAIAAVVAPVWAAT  | Negative |
| P13113 | AVVAPVWAATQTVTLSPVGM  | Negative |
| P13113 | VAPVWAATQTVTLSPVGMTCS | Negative |
| P13113 | QTVTLSPVPGMTCSACPITVK | Negative |
| P13113 | ATQTVTLSPVPGMTCSACPIT | Negative |
| P13113 | SVPGMTCSACPITVKKAIKSK | Negative |
| P13113 | WAATQTVTLSPVPGMTCSACP | Negative |
| P13113 | GMTCSACPITVKKAIKSKVEG | Negative |
| P13113 | IAAVVAPVWAATQTVTLSPV  | Negative |
| P13113 | TVTLSPVPGMTCSACPITVKK | Negative |
| P13113 | VVAPVWAATQTVTLSPVGMT  | Negative |
| P13113 | SLAIAAVVAPVWAATQTVTL  | Negative |
| P13113 | PVWAATQTVTLSPVPGMTCSA | Negative |
| P13113 | LSVPGMTCSACPITVKKAIK  | Negative |
| P13113 | LAIAAVVAPVWAATQTVTLSP | Negative |
| P13113 | KLFASLAIAAVVAPVWAATQ  | Negative |
| P13113 | PGMTCSACPITVKKAIKSKVE | Negative |
| P13113 | VWAATQTVTLSPVPGMTCSAC | Negative |
| P13204 | ALLLLLFLHLSLLGCRSHPV  | Negative |
| P13204 | SHPVGGPGPVSELPGLQELL  | Negative |
| P13204 | LFLHLSLLGCRSHPVGGPGP  | Negative |
| P13204 | LLFLHLSLLGCRSHPVGGPG  | Negative |
| P13204 | LSLLGCRSHPVGGPGPVSEL  | Negative |
| P13204 | ALSRALLLLLFLHLSLLGCR  | Negative |
| P13204 | CRSHPVGGPGPVSELPGLQE  | Negative |
| P13204 | PVGGPGPVSELPGLQELLDR  | Negative |
| P13204 | GCRSHPVGGPGPVSELPGLQ  | Negative |

|        |                      |          |
|--------|----------------------|----------|
| P13204 | LHLSLLGCRSHPVGGPGPVS | Negative |
| P13204 | RSHPVGGPGPVSELPGLQEL | Negative |
| P13204 | HLSLLGCRSHPVGGPGPVSE | Negative |
| P13204 | SLLGCRSHPVGGPGPVSELP | Negative |
| P13204 | LLLFLHLSLLGCRSHPVGGP | Negative |
| P13204 | DPQTALSRALLLLFLHLSL  | Negative |
| P13204 | LLGCRSHPVGGPGPVSELPG | Negative |
| P13204 | RALLLLFLHLSLLGCRSHP  | Negative |
| P13204 | LSRALLLLFLHLSLLGCRS  | Negative |
| P13204 | GGPGPVSELPGLQELLDRLR | Negative |
| P13204 | HPVGGPGPVSELPGLQELLD | Negative |
| P13204 | LLLLFLHLSLLGCRSHPVG  | Negative |
| P13204 | VGGPGPVSELPGLQELLDRL | Negative |
| P13204 | MDPQTALSRALLLLFLHLS  | Negative |
| P13204 | PQTALSRALLLLFLHLSLL  | Negative |
| P13204 | QTALSRALLLLFLHLSLLG  | Negative |
| P13204 | SRALLLLFLHLSLLGCRSH  | Negative |
| P13204 | TALSRALLLLFLHLSLLGC  | Negative |
| P13204 | FLHLSLLGCRSHPVGGPGPV | Negative |
| P13204 | LGCRSHPVGGPGPVSELPGL | Negative |
| P13205 | LQKVLPMILLLLFLNLSPL  | Negative |
| P13205 | QMILLLLFLNLSPLGGHSHP | Negative |
| P13205 | HPLGSPSQSPEQSTMQKLE  | Negative |
| P13205 | VLPQMILLLLFLNLSPLGGH | Negative |
| P13205 | FLNLSPLGGHSHPLGSPSQS | Negative |
| P13205 | GSPSQSPEQSTMQKLELIR  | Negative |
| P13205 | MILLLLFLNLSPLGGHSHPL | Negative |
| P13205 | PQMILLLLFLNLSPLGGHSH | Negative |
| P13205 | KVLPQMILLLLFLNLSPLGG | Negative |
| P13205 | MDLQKVLPMILLLLFLNLS  | Negative |
| P13205 | NLSPLGGHSHPLGSPSQSPE | Negative |
| P13205 | LNLSPLGGHSHPLGSPSQSP | Negative |
| P13205 | LGGHSHPLGSPSQSPEQSTM | Negative |
| P13205 | PLGGHSHPLGSPSQSPEQST | Negative |
| P13205 | GGHSHPLGSPSQSPEQSTMQ | Negative |
| P13205 | PLGSPSQSPEQSTMQKLEL  | Negative |
| P13205 | LGSPSQSPEQSTMQKLELI  | Negative |
| P13205 | ILLLLFLNLSPLGGHSHPLG | Negative |
| P13205 | GHSHPGSPSQSPEQSTMQK  | Negative |
| P13205 | QKVLPQMILLLLFLNLSPLG | Negative |
| P13205 | LLLFLNLSPLGGHSHPLGSP | Negative |
| P13205 | LFLNLSPLGGHSHPLGSPSQ | Negative |
| P13205 | HSHPLGSPSQSPEQSTMQKL | Negative |
| P13205 | SPLGGHSHPLGSPSQSPEQS | Negative |
| P13205 | LPQMILLLLFLNLSPLGGHS | Negative |
| P13205 | LSPLGGHSHPLGSPSQSPEQ | Negative |

|        |                      |          |
|--------|----------------------|----------|
| P13205 | SHPLGSPSQSPEQSTMQKLL | Negative |
| P13205 | LLFLNLSPLGGHSHPLGSPS | Negative |
| P13205 | DLQKVLPQMILLLLFLNLSP | Negative |
| P13384 | GAGGGDCGARAEVLFRCPPC | Negative |
| P13384 | GPALLLLPLLLLLLLGAGG  | Negative |
| P13384 | DCGARAEVLFRCPPCTPESL | Negative |
| P13384 | LLLLLGAGGGDCGARAEVLF | Negative |
| P13384 | GGGDCGARAEVLFRCPPCTP | Negative |
| P13384 | GGPALLLLPLLLLLLLGAG  | Negative |
| P13384 | LLPLLLLLLLGAGGGDCGA  | Negative |
| P13384 | PLLLLLLLGAGGGDCGARA  | Negative |
| P13384 | LGAGGGDCGARAEVLFRCPP | Negative |
| P13384 | GGDCGARAEVLFRCPPCTPE | Negative |
| P13384 | LLLLLLLGAGGGDCGARAEV | Negative |
| P13384 | LPLLLLLLLGAGGGDCGAR  | Negative |
| P13384 | LLLLPLLLLLLLGAGGGDC  | Negative |
| P13384 | AGGGDCGARAEVLFRCPPCT | Negative |
| P13384 | PLLLLLLLGAGGGDCGARAE | Negative |
| P13384 | GARAEVLFRCPPCTPESLAA | Negative |
| P13384 | CGARAEVLFRCPPCTPESLA | Negative |
| P13384 | PALLLPLLLLLLLGAGGG   | Negative |
| P13384 | QPRLGGPALLLPPLLLLLL  | Negative |
| P13384 | LGGPALLLPPLLLLLLLGA  | Negative |
| P13384 | LLLLLLGAGGGDCGARAEVL | Negative |
| P13384 | LLGAGGGDCGARAEVLFRC  | Negative |
| P13384 | GDCGARAEVLFRCPPCTPES | Negative |
| P13384 | MQPRLGGPALLLPPLLLLL  | Negative |
| P13384 | LLGAGGGDCGARAEVLFRCP | Negative |
| P13384 | LLPPLLLLLLLLGAGGGDCG | Negative |
| P13384 | PRLGGPALLLPPLLLLLLL  | Negative |
| P13384 | RLGGPALLLPPLLLLLLLG  | Negative |
| P13384 | ALLLPPLLLLLLLLGAGGGD | Negative |
| P13385 | RKMARFSYSVIWIMAISKVF | Negative |
| P13385 | LVAGLGHQEFARPSRGYLA  | Negative |
| P13385 | GLVAGLGHQEFARPSRGYLA | Negative |
| P13385 | IWIMAISKVFELGLVAGLGH | Negative |
| P13385 | GLGHQEFARPSRGYLAFRDD | Negative |
| P13385 | ISKVFELGLVAGLGHQEFAR | Negative |
| P13385 | MAISKVFELGLVAGLGHQEF | Negative |
| P13385 | YSVIWIMAISKVFELGLVAG | Negative |
| P13385 | KVFELGLVAGLGHQEFARPS | Negative |
| P13385 | SYSVIWIMAISKVFELGLVA | Negative |
| P13385 | FSYSVIWIMAISKVFELGLV | Negative |
| P13385 | VFELGLVAGLGHQEFARPSR | Negative |
| P13385 | SVIWIMAISKVFELGLVAGL | Negative |
| P13385 | VAGLGHQEFARPSRGYLA   | Negative |

|        |                       |          |
|--------|-----------------------|----------|
| P13385 | MARFSYSVIWIMAISKVFEL  | Negative |
| P13385 | SKVFELGLVAGLGHQEFARP  | Negative |
| P13385 | ARFSYSVIWIMAISKVFELG  | Negative |
| P13385 | MDCRKMARFSYSVIWIMAIS  | Negative |
| P13385 | ELGLVAGLGHQEFARPSRGY  | Negative |
| P13385 | CRKMARFSYSVIWIMAISKV  | Negative |
| P13385 | AGLGHQEFARPSRGYLAFRD  | Negative |
| P13385 | WIMAISKVFELGLVAGLGHQ  | Negative |
| P13385 | LGLVAGLGHQEFARPSRGYL  | Negative |
| P13385 | AISKVFELGLVAGLGHQEFA  | Negative |
| P13385 | KMARFSYSVIWIMAISKVFE  | Negative |
| P13385 | DCRKMARFSYSVIWIMAISK  | Negative |
| P13385 | RFSYSVIWIMAISKVFELGL  | Negative |
| P13385 | VIWIMAISKVFELGLVAGLG  | Negative |
| P13385 | FELGLVAGLGHQEFARPSRG  | Negative |
| P13421 | IMLATVLAFGVSSLANAADQ  | Negative |
| P13421 | VTFTGSIIDAPCSIAPESAD  | Negative |
| P13421 | GHGKVTFFTGSIIDAPCSIAP | Negative |
| P13421 | MKLNKIMLATVLAFGVSSLA  | Negative |
| P13421 | AADQGHGKVTFFTGSIIDAPC | Negative |
| P13421 | GVSSLANAADQGHGKVTFFTG | Negative |
| P13421 | ANAADQGHGKVTFFTGSIIDA | Negative |
| P13421 | GKVTFFTGSIIDAPCSIAPES | Negative |
| P13421 | KIMLATVLAFGVSSLANAAD  | Negative |
| P13421 | TVLAFGVSSLANAADQGHGK  | Negative |
| P13421 | AFGVSSLANAADQGHGKVTF  | Negative |
| P13421 | DQGHGKVTFFTGSIIDAPCSI | Negative |
| P13421 | LNKIMLATVLAFGVSSLANA  | Negative |
| P13421 | ATVLAFGVSSLANAADQGHG  | Negative |
| P13421 | NKIMLATVLAFGVSSLANAA  | Negative |
| P13421 | QGHGKVTFFTGSIIDAPCSIA | Negative |
| P13421 | KLNKIMLATVLAFGVSSLAN  | Negative |
| P13421 | LANAADQGHGKVTFFTGSIID | Negative |
| P13421 | SLANAADQGHGKVTFFTGSII | Negative |
| P13421 | ADQGHGKVTFFTGSIIDAPCS | Negative |
| P13421 | VSSLANAADQGHGKVTFFTGS | Negative |
| P13421 | HGKVTFFTGSIIDAPCSIAPE | Negative |
| P13421 | MLATVLAFGVSSLANAADQG  | Negative |
| P13421 | LAFGVSSLANAADQGHGKV   | Negative |
| P13421 | VLAFGVSSLANAADQGHGKV  | Negative |
| P13421 | FGVSSLANAADQGHGKVTF   | Negative |
| P13421 | NAADQGHGKVTFFTGSIIDAP | Negative |
| P13421 | SSLANAADQGHGKVTFFTGSI | Negative |
| P13421 | KVTFFTGSIIDAPCSIAPESA | Negative |
| P13430 | FSAQAVDTTITVTGNVLQRT  | Negative |
| P13430 | KAIILATGLINCIAFSAQAV  | Negative |

|        |                       |          |
|--------|-----------------------|----------|
| P13430 | LINCIAFSAQAVDTTITVTG  | Negative |
| P13430 | SAQAVDTTITVTGNVLQRTC  | Negative |
| P13430 | VDTTITVTGNVLQRTCNPVG  | Negative |
| P13430 | TVTGNVLQRTCNPVGNVDVS  | Negative |
| P13430 | CIAFSAQAVDTTITVTGNVL  | Negative |
| P13430 | MKLKAILLATGLINCIAFSA  | Negative |
| P13430 | QAVDTTITVTGNVLQRTCNV  | Negative |
| P13430 | AFSAQAVDTTITVTGNVLQR  | Negative |
| P13430 | NCIAFSAQAVDTTITVTGNV  | Negative |
| P13430 | IAFSAQAVDTTITVTGNVLQ  | Negative |
| P13430 | TTITVTGNVLQRTCNPVGNV  | Negative |
| P13430 | ATGLINCIAFSAQAVDTTIT  | Negative |
| P13430 | VTGNVLQRTCNPVGNVDVSL  | Negative |
| P13430 | TGNVLQRTCNPVGNVDVSLG  | Negative |
| P13430 | IILATGLINCIAFSAQAVDT  | Negative |
| P13430 | TGLINCIAFSAQAVDTTITV  | Negative |
| P13430 | ILATGLINCIAFSAQAVDTT  | Negative |
| P13430 | TITVTGNVLQRTCNPVGNVD  | Negative |
| P13430 | DTTITVTGNVLQRTCNPVGN  | Negative |
| P13430 | AQAVDTTITVTGNVLQRTC   | Negative |
| P13430 | LKAILLATGLINCIAFSAQA  | Negative |
| P13430 | KLKAILLATGLINCIAFSAQ  | Negative |
| P13430 | AVDTTITVTGNVLQRTCNPV  | Negative |
| P13430 | GLINCIAFSAQAVDTTITVT  | Negative |
| P13430 | AAILLATGLINCIAFSAQAVD | Negative |
| P13430 | INCIAFSAQAVDTTITVTGN  | Negative |
| P13430 | ITVTGNVLQRTCNPVGNVDV  | Negative |
| P13432 | MKSLYLIFGLWILLACFQSG  | Negative |
| P13432 | RQHNPRRQQDPSTLPHYLGL  | Negative |
| P13432 | VRGPRRQHNPRRQQDPSTLP  | Negative |
| P13432 | GPRRQHNPRRQQDPSTLPHY  | Negative |
| P13432 | HNPRRQQDPSTLPHYLGLQP  | Negative |
| P13432 | LLACFQSGEGVRGPRRQHNP  | Negative |
| P13432 | RRQHNPRRQQDPSTLPHYLG  | Negative |
| P13432 | IFGLWILLACFQSGEGVRGP  | Negative |
| P13432 | EGVRGPRRQHNPRRQQDPST  | Negative |
| P13432 | RGPRRQHNPRRQQDPSTLPH  | Negative |
| P13432 | GVRGPRRQHNPRRQQDPSTL  | Negative |
| P13432 | GEGVRGPRRQHNPRRQQDPS  | Negative |
| P13432 | ILLACFQSGEGVRGPRRQHN  | Negative |
| P13432 | GLWILLACFQSGEGVRGPRR  | Negative |
| P13432 | WILLACFQSGEGVRGPRRQH  | Negative |
| P13432 | SLYLIFGLWILLACFQSGEG  | Negative |
| P13432 | LACFQSGEGVRGPRRQHNP   | Negative |
| P13432 | CFQSGEGVRGPRRQHNPRRQ  | Negative |
| P13432 | KSLYLIFGLWILLACFQSGE  | Negative |

|        |                         |          |
|--------|-------------------------|----------|
| P13432 | LWILLACFQSGEGVRGPRRQ    | Negative |
| P13432 | SGEGVRGPRRQHNP RRQ QDP  | Negative |
| P13432 | FQSGEGVRGPRRQHNP RRQ Q  | Negative |
| P13432 | LYLIFGLWILLACFQSGEGV    | Negative |
| P13432 | PRRQHNP RRQ QDPSTLPHYL  | Negative |
| P13432 | ACFQSGEGVRGPRRQHNP RR   | Negative |
| P13432 | YLIFGLWILLACFQSGEGVR    | Negative |
| P13432 | QSGEGVRGPRRQHNP RRQ QD  | Negative |
| P13432 | LIFGLWILLACFQSGEGVRG    | Negative |
| P13432 | QHNP RRQ QDPSTLPHYLG LQ | Negative |
| P13487 | TNVSCTTSKECWSVCQRLHN    | Negative |
| P13487 | LSVLL LALIICSIVGWSEAQ   | Negative |
| P13487 | NVSCTTSKECWSVCQRLHNT    | Negative |
| P13487 | VLL LALIICSIVGWSEAQFT   | Negative |
| P13487 | SIVGWSEAQFTNVSCTTSKE    | Negative |
| P13487 | VGWSEAQFTNVSCTTSKECW    | Negative |
| P13487 | VSCTTSKECWSVCQRLHNTS    | Negative |
| P13487 | WSEAQFTNVSCTTSKECWSV    | Negative |
| P13487 | IICSIVGWSEAQFTNVSCTT    | Negative |
| P13487 | EAQFTNVSCTTSKECWSVCQ    | Negative |
| P13487 | KILSVLL LALIICSIVGWSE   | Negative |
| P13487 | QFTNVSCTTSKECWSVCQRL    | Negative |
| P13487 | TTSKECWSVCQRLHNTSRGK    | Negative |
| P13487 | SCTTSKECWSVCQRLHNTSR    | Negative |
| P13487 | SEAQFTNVSCTTSKECWSVC    | Negative |
| P13487 | ILSVLL LALIICSIVGWSEA   | Negative |
| P13487 | GWSEAQFTNVSCTTSKECWS    | Negative |
| P13487 | CSIVGWSEAQFTNVSCTTSK    | Negative |
| P13487 | LIICSIVGWSEAQFTNVSCT    | Negative |
| P13487 | AQFTNVSCTTSKECWSVCQR    | Negative |
| P13487 | MKILSVLL LALIICSIVGWS   | Negative |
| P13487 | FTNVSCTTSKECWSVCQRLH    | Negative |
| P13487 | CTTSKECWSVCQRLHNTSRG    | Negative |
| P13487 | LL LALIICSIVGWSEAQFTN   | Negative |
| P13487 | ICSIVGWSEAQFTNVSCTTS    | Negative |
| P13487 | SVLL LALIICSIVGWSEAQF   | Negative |
| P13487 | LALIICSIVGWSEAQFTNVS    | Negative |
| P13487 | ALIICSIVGWSEAQFTNVSC    | Negative |
| P13487 | IVGWSEAQFTNVSCTTSKEC    | Negative |
| P13500 | AATFIPQGLAQPD AINAPVT   | Negative |
| P13500 | SAALLCLLLIAATFIPQGLA    | Negative |
| P13500 | DAINAPVTCCYNFTNRKISV    | Negative |
| P13500 | LIAATFIPQGLAQPD AINAP   | Negative |
| P13500 | AINAPVTCCYNFTNRKISVQ    | Negative |
| P13500 | VSAALLCLLLIAATFIPQGL    | Negative |
| P13500 | KVSAALLCLLLIAATFIPQG    | Negative |



|        |                      |          |
|--------|----------------------|----------|
| P13500 | MKVSAALLCLLLIAATFIPQ | Negative |
| P13500 | LLLIAATFIPQGLAQPDAIN | Negative |
| P13500 | AALLCLLLIAATFIPQGLAQ | Negative |
| P13500 | AQPDAINAPVTCCYNFTNRK | Negative |
| P13500 | NAPVTCCYNFTNRKISVQRL | Negative |
| P13500 | QGLAQPDAINAPVTCCYNFT | Negative |
| P13500 | GLAQPDAINAPVTCCYNFTN | Negative |
| P13500 | LCLLLIAATFIPQGLAQPDA | Negative |
| P13500 | ALLCLLLIAATFIPQGLAQP | Negative |
| P13500 | APVTCCYNFTNRKISVQRLA | Negative |
| P13500 | INAPVTCCYNFTNRKISVQR | Negative |
| P13500 | IPQGLAQPDAINAPVTCCYN | Negative |
| P13500 | TFIPQGLAQPDAINAPVTCC | Negative |
| P13500 | QPDAINAPVTCCYNFTNRKI | Negative |
| P13500 | PDAINAPVTCCYNFTNRKIS | Negative |
| P13500 | LAQPDAINAPVTCCYNFTNR | Negative |
| P13500 | LLCLLLIAATFIPQGLAQPD | Negative |
| P13500 | IAATFIPQGLAQPDAINAPV | Negative |
| P13500 | LLIAATFIPQGLAQPDAINA | Negative |
| P13500 | ATFIPQGLAQPDAINAPVTC | Negative |
| P13500 | PQGLAQPDAINAPVTCCYNF | Negative |
| P13500 | FIPQGLAQPDAINAPVTCCY | Negative |
| P13501 | APASASPYSSDTPCCFAYI  | Negative |
| P13501 | ILIATALCAPASASPYSSDT | Negative |
| P13501 | LIATALCAPASASPYSSDTT | Negative |
| P13501 | TALCAPASASPYSSDTPCC  | Negative |
| P13501 | AALAVILIATALCAPASASP | Negative |
| P13501 | VILIATALCAPASASPYSSD | Negative |
| P13501 | SPYSSDTPCCFAYIARPLP  | Negative |
| P13501 | SAAALAVILIATALCAPASA | Negative |
| P13501 | ALCAPASASPYSSDTPCCF  | Negative |
| P13501 | TTPCCFAYIARPLPRAHIKE | Negative |
| P13501 | AAALAVILIATALCAPASAS | Negative |
| P13501 | ALAVILIATALCAPASASPY | Negative |
| P13501 | MKVSAALAVILIATALCAP  | Negative |
| P13501 | LAVILIATALCAPASASPYS | Negative |
| P13501 | SDTTPCCFAYIARPLPRAHI | Negative |
| P13501 | ASPYSSDTPCCFAYIARPL  | Negative |
| P13501 | DTPCCFAYIARPLPRAHIK  | Negative |
| P13501 | IATALCAPASASPYSSDTTP | Negative |
| P13501 | CAPASASPYSSDTPCCFAY  | Negative |
| P13501 | ASASPYSSDTPCCFAYIAR  | Negative |
| P13501 | PASASPYSSDTPCCFAYIA  | Negative |
| P13501 | ATALCAPASASPYSSDTPC  | Negative |
| P13501 | SASPYSSDTPCCFAYIARP  | Negative |
| P13501 | LCAPASASPYSSDTPCCFA  | Negative |

|        |                      |          |
|--------|----------------------|----------|
| P13501 | PYSSDTPCCFAYIARPLPR  | Negative |
| P13501 | SSDTPCCFAYIARPLRAH   | Negative |
| P13501 | YSSDTPCCFAYIARPLPRA  | Negative |
| P13501 | VSAAALAVILIATALCAPAS | Negative |
| P13501 | KVSAAALAVILIATALCAPA | Negative |
| P13611 | THALHKVKVGKSPVVRGSL  | Negative |
| P13611 | VGKSPVVRGSLSGKVSLPCH | Negative |
| P13611 | LHKVKVGKSPVVRGSLSGKV | Negative |
| P13611 | NIKSILWMCSTLIVTHALHK | Negative |
| P13611 | SPPVRGSLSGKVSLPCHFST | Negative |
| P13611 | LWMCSTLIVTHALHKVKVGK | Negative |
| P13611 | IVTHALHKVKVGKSPVVRGS | Negative |
| P13611 | ILWMCSTLIVTHALHKVKVG | Negative |
| P13611 | KSPVVRGSLSGKVSLPCHFS | Negative |
| P13611 | HALHKVKVGKSPVVRGSLSG | Negative |
| P13611 | VTHALHKVKVGKSPVVRGSL | Negative |
| P13611 | PPVRGSLSGKVSLPCHFSTM | Negative |
| P13611 | KVGKSPVVRGSLSGKVSLPC | Negative |
| P13611 | INIKSILWMCSTLIVTHALH | Negative |
| P13611 | IKSILWMCSTLIVTHALHKV | Negative |
| P13611 | TLIVTHALHKVKVGKSPVVR | Negative |
| P13611 | MCSTLIVTHALHKVKVGKSP | Negative |
| P13611 | STLIVTHALHKVKVGKSPV  | Negative |
| P13611 | KVKVGKSPVVRGSLSGKVSL | Negative |
| P13611 | GKSPVVRGSLSGKVSLPCHF | Negative |
| P13611 | WMCSTLIVTHALHKVKVGKS | Negative |
| P13611 | SILWMCSTLIVTHALHKVKV | Negative |
| P13611 | LIVTHALHKVKVGKSPVVRG | Negative |
| P13611 | VKVGKSPVVRGSLSGKVSLP | Negative |
| P13611 | MFINIKSILWMCSTLIVTHA | Negative |
| P13611 | HKVKVGKSPVVRGSLSGKVS | Negative |
| P13611 | FINIKSILWMCSTLIVTHAL | Negative |
| P13611 | ALHKVKVGKSPVVRGSLSGK | Negative |
| P13611 | CSTLIVTHALHKVKVGKSP  | Negative |
| P13661 | ASTDISTVASPLFEGTEGCF | Negative |
| P13661 | FAIFLIANIYSSASASTD   | Negative |
| P13661 | IYSSASASTDISTVASPLFE | Negative |
| P13661 | IYSSASASTDISTVASPLF  | Negative |
| P13661 | TDISTVASPLFEGTEGCFL  | Negative |
| P13661 | ASASTDISTVASPLFEGTEG | Negative |
| P13661 | IANIYSSASASTDISTVA   | Negative |
| P13661 | HINFAIFLIANIYSSASA   | Negative |
| P13661 | STVASPLFEGTEGCFLLYDA | Negative |
| P13661 | MKNTIHINFAIFLIANIY   | Negative |
| P13661 | TIHINFAIFLIANIYSSA   | Negative |
| P13661 | LIANIYSSASASTDISTV   | Negative |

|        |                      |          |
|--------|----------------------|----------|
| P13661 | ANIIYSSASASTDISTVASP | Negative |
| P13661 | IHINFAIFLIIANIIYSSAS | Negative |
| P13661 | SASASTDISTVASPLFEGTE | Negative |
| P13661 | IANIIYSSASASTDISTVAS | Negative |
| P13661 | DISTVASPLFEGTEGCFLLY | Negative |
| P13661 | NTIHINFAIFLIIANIIYSS | Negative |
| P13661 | FLIIANIIYSSASASTDIST | Negative |
| P13661 | STDISTVASPLFEGTEGCFL | Negative |
| P13661 | SSASASTDISTVASPLFEGT | Negative |
| P13661 | NIIYSSASASTDISTVASPL | Negative |
| P13661 | SASTDISTVASPLFEGTEGC | Negative |
| P13661 | AIFLIIANIIYSSASASTDI | Negative |
| P13661 | KNTIHINFAIFLIIANIYS  | Negative |
| P13661 | ISTVASPLFEGTEGCFLLYD | Negative |
| P13661 | YSSASASTDISTVASPLFEG | Negative |
| P13661 | INFAIFLIIANIIYSSASAS | Negative |
| P13661 | NFAIFLIIANIIYSSASAST | Negative |
| P13671 | DHYAWTQWTSCSKTCNSGTQ | Negative |
| P13671 | RSVLYFILLNALINKGQACF | Negative |
| P13671 | MARRSVLYFILLNALINKGQ | Negative |
| P13671 | YFILLNALINKGQACFCDHY | Negative |
| P13671 | FILLNALINKGQACFCDHYA | Negative |
| P13671 | TQWTSCSKTCNSGTQSRHRQ | Negative |
| P13671 | KGQACFCDHYAWTQWTSCSK | Negative |
| P13671 | YAWTQWTSCSKTCNSGTQSR | Negative |
| P13671 | AWTQWTSCSKTCNSGTQSRH | Negative |
| P13671 | FCDHYAWTQWTSCSKTCNSG | Negative |
| P13671 | WTQWTSCSKTCNSGTQSRHR | Negative |
| P13671 | ILLNALINKGQACFCDHYAW | Negative |
| P13671 | NALINKGQACFCDHYAWTQW | Negative |
| P13671 | NKGQACFCDHYAWTQWTSCS | Negative |
| P13671 | CDHYAWTQWTSCSKTCNSGT | Negative |
| P13671 | SVLYFILLNALINKGQACFC | Negative |
| P13671 | RRSVLYFILLNALINKGQAC | Negative |
| P13671 | VLYFILLNALINKGQACFCD | Negative |
| P13671 | ARRSVLYFILLNALINKGQA | Negative |
| P13671 | LLNALINKGQACFCDHYAWT | Negative |
| P13671 | HYAWTQWTSCSKTCNSGTQS | Negative |
| P13671 | CFCDHYAWTQWTSCSKTCNS | Negative |
| P13671 | ACFCDHYAWTQWTSCSKTCN | Negative |
| P13671 | GQACFCDHYAWTQWTSCSKT | Negative |
| P13671 | LNALINKGQACFCDHYAWTQ | Negative |
| P13671 | INKGQACFCDHYAWTQWTSC | Negative |
| P13671 | LINKGQACFCDHYAWTQWTS | Negative |
| P13671 | ALINKGQACFCDHYAWTQWT | Negative |
| P13671 | QACFCDHYAWTQWTSCSKTC | Negative |

|        |                      |          |
|--------|----------------------|----------|
| P13686 | LADGATPALRFVAVGDWGGV | Negative |
| P13686 | TALLILQALLPSLADGATP  | Negative |
| P13686 | LILQALLPSLADGATPALR  | Negative |
| P13686 | MWTALLILQALLPSLADGA  | Negative |
| P13686 | ILQALLPSLADGATPALRF  | Negative |
| P13686 | MDMWTALLILQALLPSLAD  | Negative |
| P13686 | LQALLPSLADGATPALRFV  | Negative |
| P13686 | ALRFVAVGDWGGVPNAPFHT | Negative |
| P13686 | LLPSLADGATPALRFVAVG  | Negative |
| P13686 | LPSLADGATPALRFVAVGDW | Negative |
| P13686 | PSLADGATPALRFVAVGDWG | Negative |
| P13686 | ATPALRFVAVGDWGGVPNAP | Negative |
| P13686 | SLADGATPALRFVAVGDWGG | Negative |
| P13686 | FVAVGDWGGVPNAPFHTARE | Negative |
| P13686 | PALRFVAVGDWGGVPNAPFH | Negative |
| P13686 | DMWTALLILQALLPSLADG  | Negative |
| P13686 | RFVAVGDWGGVPNAPFHTAR | Negative |
| P13686 | AVGDWGGVPNAPFHTAREMA | Negative |
| P13686 | LLPSLADGATPALRFVAVGD | Negative |
| P13686 | QALLPSLADGATPALRFVA  | Negative |
| P13686 | DGATPALRFVAVGDWGGVPN | Negative |
| P13686 | WTALLILQALLPSLADGAT  | Negative |
| P13686 | ADGATPALRFVAVGDWGGVP | Negative |
| P13686 | ALLILQALLPSLADGATPA  | Negative |
| P13686 | LRFVAVGDWGGVPNAPFHTA | Negative |
| P13686 | TPALRFVAVGDWGGVPNAPF | Negative |
| P13686 | ALLPSLADGATPALRFVAV  | Negative |
| P13686 | VAVGDWGGVPNAPFHTAREM | Negative |
| P13686 | GATPALRFVAVGDWGGVPNA | Negative |
| P13689 | ARGAYLAGVGVAVLLAASFL | Negative |
| P13689 | MAPDLSELAAAAAARGAYLA | Negative |
| P13689 | VLLAASFLPVAESSCVRDNS | Negative |
| P13689 | AAAAARGAYLAGVGVAVLLA | Negative |
| P13689 | GVGVAVLLAASFLPVAESSC | Negative |
| P13689 | AASFLPVAESSCVRDNSLVR | Negative |
| P13689 | ELAAAAAARGAYLAGVGVAV | Negative |
| P13689 | APDLSELAAAAAARGAYLAG | Negative |
| P13689 | LSELAAAAAARGAYLAGVGV | Negative |
| P13689 | LAASFLPVAESSCVRDNSLV | Negative |
| P13689 | GVAVLLAASFLPVAESSCVR | Negative |
| P13689 | YLAGVGVAVLLAASFLPVAE | Negative |
| P13689 | AVLLAASFLPVAESSCVRDN | Negative |
| P13689 | SELAAAAAARGAYLAGVGVA | Negative |
| P13689 | LLAASFLPVAESSCVRDNSL | Negative |
| P13689 | ASFLPVAESSCVRDNSLVRD | Negative |
| P13689 | AAAARGAYLAGVGVAVLLAA | Negative |

|        |                       |          |
|--------|-----------------------|----------|
| P13689 | LAAAAAARGAYLAGVGVAVL  | Negative |
| P13689 | AARGAYLAGVGVAVLLAASF  | Negative |
| P13689 | AAAAAARGAYLAGVGVAVLL  | Negative |
| P13689 | PDLSELAAAAAARGAYLAGV  | Negative |
| P13689 | VGVAVLLAASFLPVAESSCV  | Negative |
| P13689 | GAYLAGVGVAVLLAASFLPV  | Negative |
| P13689 | LAGVGVAVLLAASFLPVAES  | Negative |
| P13689 | AAARGAYLAGVGVAVLLAAS  | Negative |
| P13689 | AYLAGVGVAVLLAASFLPVA  | Negative |
| P13689 | RGAYLAGVGVAVLLAASFLP  | Negative |
| P13689 | AGVGVAVLLAASFLPVAESS  | Negative |
| P13689 | DLSELAAAAAARGAYLAGVG  | Negative |
| P13691 | PMTGARSDNSGPWMWCDPEM  | Negative |
| P13691 | TPMTGARSDNSGPWMWCDPE  | Negative |
| P13691 | LVLLLCMLMVTPMTGARSDN  | Negative |
| P13691 | VTPMTGARSDNSGPWMWCDP  | Negative |
| P13691 | WMKSMLLVLLLCMLMVTPMT  | Negative |
| P13691 | ARSDNSGPWMWCDPEMGHKV  | Negative |
| P13691 | GARSDNSGPWMWCDPEMGHK  | Negative |
| P13691 | LLVLLLCMLMVTPMTGARSD  | Negative |
| P13691 | MLMVTPMTGARSDNSGPWMW  | Negative |
| P13691 | NSGPWMWCDPEMGHKVSPLT  | Negative |
| P13691 | AMWMKSMLLVLLLCMLMVTP  | Negative |
| P13691 | RSDNSGPWMWCDPEMGHKVS  | Negative |
| P13691 | GAMWMKSMLLVLLLCMLMVT  | Negative |
| P13691 | LCMLMVTPMTGARSDNSGPW  | Negative |
| P13691 | MTGARSDNSGPWMWCDPEMG  | Negative |
| P13691 | DNSGPWMWCDPEMGHKVSPL  | Negative |
| P13691 | MVTPMTGARSDNSGPWMWCD  | Negative |
| P13691 | LLCMLMVTPMTGARSDNSGP  | Negative |
| P13691 | VLLLCMLMVTPMTGARSDNS  | Negative |
| P13691 | MWMKSMLLVLLLCMLMVTPM  | Negative |
| P13691 | MKSMLLVLLLCMLMVTPMTG  | Negative |
| P13691 | SMLLVLLLCMLMVTPMTGAR  | Negative |
| P13691 | MLLVLLLCMLMVTPMTGARS  | Negative |
| P13691 | TGARSDNSGPWMWCDPEMGH  | Negative |
| P13691 | LLCMLMVTPMTGARSDNSG   | Negative |
| P13691 | KSMLLVLLLCMLMVTPMTGA  | Negative |
| P13691 | LMVTPMTGARSDNSGPWMWC  | Negative |
| P13691 | MGAMWMKSMLLVLLLCMLMV  | Negative |
| P13691 | SDNSGPWMWCDPEMGHKVSP  | Negative |
| P13720 | KKWFPAFLFLSLSGGNDALA  | Negative |
| P13720 | LSLSGGNDALAGWHNVMFYA  | Negative |
| P13720 | YAFNDYLT TNAGNVKVIDQP | Negative |
| P13720 | NDALAGWHNVMFYAFNDYLT  | Negative |
| P13720 | WHNVMFYAFNDYLT TNAGNV | Negative |

|        |                      |          |
|--------|----------------------|----------|
| P13720 | LSGGNDALAGWHNVMFYAFN | Negative |
| P13720 | PAFLFLSLSGGNDALAGWHN | Negative |
| P13720 | LFLSLSGGNDALAGWHNVMF | Negative |
| P13720 | DALAGWHNVMFYAFNDYLT  | Negative |
| P13720 | LAGWHNVMFYAFNDYLTNA  | Negative |
| P13720 | NVMFYAFNDYLTNAGNVKV  | Negative |
| P13720 | AGWHNVMFYAFNDYLTNAG  | Negative |
| P13720 | ALAGWHNVMFYAFNDYLTN  | Negative |
| P13720 | FLFLSLSGGNDALAGWHNVM | Negative |
| P13720 | AFNDYLTNAGNVKVIDQPQ  | Negative |
| P13720 | MFYAFNDYLTNAGNVKVID  | Negative |
| P13720 | GNDALAGWHNVMFYAFNDYL | Negative |
| P13720 | MKKWFPAFLFLSLSGGNDAL | Negative |
| P13720 | HNVMFYAFNDYLTNAGNVK  | Negative |
| P13720 | FPAFLFLSLSGGNDALAGWH | Negative |
| P13720 | FYAFNDYLTNAGNVKVIDQ  | Negative |
| P13720 | KWFPAFLFLSLSGGNDALAG | Negative |
| P13720 | WFPAFLFLSLSGGNDALAGW | Negative |
| P13720 | VMFYAFNDYLTNAGNVKVI  | Negative |
| P13720 | GWHNVMFYAFNDYLTNAGN  | Negative |
| P13720 | FLSLSGGNDALAGWHNVMFY | Negative |
| P13720 | GGNDALAGWHNVMFYAFNDY | Negative |
| P13720 | SGGNDALAGWHNVMFYAFND | Negative |
| P13720 | SLSGGNDALAGWHNVMFYAF | Negative |
| P13725 | MAAIGSCSKEYRVLLGQLQK | Negative |
| P13725 | GVLLTQRTLLSLVLALLFPS | Negative |
| P13725 | MGVLLTQRTLLSLVLALLFP | Negative |
| P13725 | LFPSMASMAAIGSCSKEYRV | Negative |
| P13725 | AAIGSCSKEYRVLLGQLQKQ | Negative |
| P13725 | LTQRTLLSLVLALLFPSMAS | Negative |
| P13725 | VLLTQRTLLSLVLALLFPSM | Negative |
| P13725 | AIGSCSKEYRVLLGQLQKQT | Negative |
| P13725 | TQRTLLSLVLALLFPSMASM | Negative |
| P13725 | LLTQRTLLSLVLALLFPSMA | Negative |
| P13725 | LALLFPSMASMAAIGSCSKE | Negative |
| P13725 | ALLFPSMASMAAIGSCSKEY | Negative |
| P13725 | ASMAAIGSCSKEYRVLLGQL | Negative |
| P13725 | QRTLLSLVLALLFPSMASMA | Negative |
| P13725 | GSCSKEYRVLLGQLQKQTDL | Negative |
| P13725 | LVLALLFPSMASMAAIGSCS | Negative |
| P13725 | IGSCSKEYRVLLGQLQKQTD | Negative |
| P13725 | MASMAAIGSCSKEYRVLLGQ | Negative |
| P13725 | FPSMASMAAIGSCSKEYRVL | Negative |
| P13725 | LLFPSMASMAAIGSCSKEYR | Negative |
| P13725 | TLLSLVLALLFPSMASMAAI | Negative |
| P13725 | SMASMAAIGSCSKEYRVLLG | Negative |

|        |                      |          |
|--------|----------------------|----------|
| P13725 | VLALLFPSMASMAAIGSCSK | Negative |
| P13725 | LLSLVLALLFPSMASMAAIG | Negative |
| P13725 | RTLSSLVLALLFPSMASMAA | Negative |
| P13725 | SLVLALLFPSMASMAAIGSC | Negative |
| P13725 | SCSKEYRVLLGQLQKQTDLM | Negative |
| P13725 | PSMASMAAIGSCSKEYRVLL | Negative |
| P13725 | SMAAIGSCSKEYRVLLGQLQ | Negative |
| P13727 | ETPLGAKTLPEDEETPEQEM | Negative |
| P13727 | LFGAVSALHLRSETSTFETP | Negative |
| P13727 | FGAVSALHLRSETSTFETPL | Negative |
| P13727 | HLRSETSTFETPLGAKTLPE | Negative |
| P13727 | RSETSTFETPLGAKTLPEDE | Negative |
| P13727 | LLLALLFGAVSALHLRSETS | Negative |
| P13727 | ALHLRSETSTFETPLGAKTL | Negative |
| P13727 | STFETPLGAKTLPEDEETPE | Negative |
| P13727 | ALLFGAVSALHLRSETSTFE | Negative |
| P13727 | LGAKTLPEDEETPEQEMEET | Negative |
| P13727 | TSTFETPLGAKTLPEDEETP | Negative |
| P13727 | TPLGAKTLPEDEETPEQEME | Negative |
| P13727 | VSALHLRSETSTFETPLGAK | Negative |
| P13727 | LPLLLALLFGAVSALHLRSE | Negative |
| P13727 | MKLPLLLALLFGAVSALHLR | Negative |
| P13727 | SETSTFETPLGAKTLPEDEE | Negative |
| P13727 | LHLRSETSTFETPLGAKTLP | Negative |
| P13727 | PLGAKTLPEDEETPEQEMEE | Negative |
| P13727 | LLFGAVSALHLRSETSTFET | Negative |
| P13727 | LLALLFGAVSALHLRSETST | Negative |
| P13727 | AVSALHLRSETSTFETPLGA | Negative |
| P13727 | SALHLRSETSTFETPLGAKT | Negative |
| P13727 | ETSTFETPLGAKTLPEDEET | Negative |
| P13727 | FETPLGAKTLPEDEETPEQE | Negative |
| P13727 | TFETPLGAKTLPEDEETPEQ | Negative |
| P13727 | LRSETSTFETPLGAKTLPED | Negative |
| P13727 | PLLLALLFGAVSALHLRSET | Negative |
| P13727 | LALLFGAVSALHLRSETSTF | Negative |
| P13727 | GAVSALHLRSETSTFETPLG | Negative |
| P13744 | QSPWEFQGSEVWQQHRYQSP | Negative |
| P13744 | RSSLFTFLCLAVFINGCLSQ | Negative |
| P13744 | LSQIEQQSPWEFQGSEVWQQ | Negative |
| P13744 | AVFINGCLSQIEQQSPWEFQ | Negative |
| P13744 | TFLCLAVFINGCLSQIEQQS | Negative |
| P13744 | WEFQGSEVWQQHRYQSPRAC | Negative |
| P13744 | MARSSLFTFLCLAVFINGCL | Negative |
| P13744 | GCLSQIEQQSPWEFQGSEVW | Negative |
| P13744 | LAVFINGCLSQIEQQSPWEF | Negative |
| P13744 | QQSPWEFQGSEVWQQHRYQS | Negative |

|        |                      |          |
|--------|----------------------|----------|
| P13744 | FINGCLSQIEQQSPWEFQGS | Negative |
| P13744 | SLFTFLCLAVFINGCLSQIE | Negative |
| P13744 | PWEFQGSEVWQQHRYQSPRA | Negative |
| P13744 | LCLAVFINGCLSQIEQQSPW | Negative |
| P13744 | ARSSLFTFLCLAVFINGCLS | Negative |
| P13744 | CLSQIEQQSPWEFQGSEVWQ | Negative |
| P13744 | IEQQSPWEFQGSEVWQQHRY | Negative |
| P13744 | SSLFTFLCLAVFINGCLSQI | Negative |
| P13744 | EQQSPWEFQGSEVWQQHRYQ | Negative |
| P13744 | CLAVFINGCLSQIEQQSPWE | Negative |
| P13744 | VFINGCLSQIEQQSPWEFQG | Negative |
| P13744 | SPWEFQGSEVWQQHRYQSPR | Negative |
| P13744 | INGCLSQIEQQSPWEFQGSE | Negative |
| P13744 | QIEQQSPWEFQGSEVWQQHR | Negative |
| P13744 | SQIEQQSPWEFQGSEVWQQH | Negative |
| P13744 | NGCLSQIEQQSPWEFQGSEV | Negative |
| P13744 | LFTFLCLAVFINGCLSQIEQ | Negative |
| P13744 | EFQGSEVWQQHRYQSPRACR | Negative |
| P13744 | FLCLAVFINGCLSQIEQQSP | Negative |
| P13909 | GEGSASYQPQSAAASLATDF | Negative |
| P13909 | QSAAASLATDFGVKVFQQVV | Negative |
| P13909 | SAAASLATDFGVKVFQQVVR | Negative |
| P13909 | QPQSAAASLATDFGVKVFQQ | Negative |
| P13909 | EGSASYQPQSAAASLATDFG | Negative |
| P13909 | PQSAAASLATDFGVKVFQQV | Negative |
| P13909 | FGESASYQPQSAAASLATD  | Negative |
| P13909 | LALGLALIFGESASYQPQS  | Negative |
| P13909 | GLALIFGESASYQPQSAAA  | Negative |
| P13909 | YQPQSAAASLATDFGVKVFQ | Negative |
| P13909 | LIFGESASYQPQSAAASLA  | Negative |
| P13909 | VFACLALGLALIFGESASY  | Negative |
| P13909 | LALIFGESASYQPQSAAAS  | Negative |
| P13909 | SPVFACLALGLALIFGESAS | Negative |
| P13909 | ALIFGESASYQPQSAAASL  | Negative |
| P13909 | MRMSPVFACLALGLALIFGE | Negative |
| P13909 | ALGLALIFGESASYQPQSA  | Negative |
| P13909 | SASYQPQSAAASLATDFGVK | Negative |
| P13909 | GSASYQPQSAAASLATDFGV | Negative |
| P13909 | IFGESASYQPQSAAASLAT  | Negative |
| P13909 | SYQPQSAAASLATDFGVKVF | Negative |
| P13909 | PVFACLALGLALIFGESAS  | Negative |
| P13909 | RMSPVFACLALGLALIFGEG | Negative |
| P13909 | MSPVFACLALGLALIFGEGS | Negative |
| P13909 | LGLALIFGESASYQPQSAA  | Negative |
| P13909 | ASYQPQSAAASLATDFGVKV | Negative |
| P13909 | FACLALGLALIFGESASYQ  | Negative |



|        |                      |          |
|--------|----------------------|----------|
| P13909 | ACLALGLALIFGEGSASYQP | Negative |
| P13909 | AAASLATDFGVKVFQQVVRA | Negative |
| P13917 | SVTPTKPINLVVLPVQNDGS | Negative |
| P13917 | LHYFLALSLSCSFLFLSDS  | Negative |
| P13917 | SILHYFLALSLSCSFLFLS  | Negative |
| P13917 | DSVTPTKPINLVVLPVQNDG | Negative |
| P13917 | SDSVTPTKPINLVVLPVQND | Negative |
| P13917 | YFLALSLSCSFLFLSDSVT  | Negative |
| P13917 | MASILHYFLALSLSCSFLFF | Negative |
| P13917 | ASILHYFLALSLSCSFLFFL | Negative |
| P13917 | CSFLFLSDSVTPTKPINLV  | Negative |
| P13917 | TKPINLVVLPVQNDGSTGLH | Negative |
| P13917 | FLSDSVTPTKPINLVVLPVQ | Negative |
| P13917 | LSDSVTPTKPINLVVLPVQN | Negative |
| P13917 | VTPTKPINLVVLPVQNDGST | Negative |
| P13917 | SLSCSFLFLSDSVTPTKPI  | Negative |
| P13917 | FLALSLSCSFLFLSDSVTP  | Negative |
| P13917 | LFFLSDSVTPTKPINLVVLP | Negative |
| P13917 | FFLSDSVTPTKPINLVVLPV | Negative |
| P13917 | ILHYFLALSLSCSFLFLSD  | Negative |
| P13917 | LSCSFLFLSDSVTPTKPIN  | Negative |
| P13917 | FLFFLSDSVTPTKPINLVVL | Negative |
| P13917 | PINLVVLPVQNDGSTGLHWA | Negative |
| P13917 | LSLSCSFLFLSDSVTPTKP  | Negative |
| P13917 | TPTKPINLVVLPVQNDGSTG | Negative |
| P13917 | KPINLVVLPVQNDGSTGLHW | Negative |
| P13917 | SFLFLSDSVTPTKPINLVV  | Negative |
| P13917 | PTKPINLVVLPVQNDGSTGL | Negative |
| P13917 | HYFLALSLSCSFLFLSDSV  | Negative |
| P13917 | LALSLSCSFLFLSDSVTPT  | Negative |
| P13917 | SCSFLFLSDSVTPTKPINL  | Negative |
| P13987 | LFGLLLVLAVFCHSGHSLQC | Negative |
| P13987 | YNCNPNTADCKTAVNCSSDF | Negative |
| P13987 | NCPNPTADCKTAVNCSSDFD | Negative |
| P13987 | GHSLQCYNCNPNTADCKTAV | Negative |
| P13987 | CHSGHSLQCYNCNPNTADCK | Negative |
| P13987 | SVLFGLLLVLAVFCHSGHSL | Negative |
| P13987 | QCYNCPNPTADCKTAVNCSS | Negative |
| P13987 | VFCHSGHSLQCYNCNPNTAD | Negative |
| P13987 | VLAVFCHSGHSLQCYNCNP  | Negative |
| P13987 | QGGSVLFGLLLVLAVFCHSG | Negative |
| P13987 | AVFCHSGHSLQCYNCNPNTA | Negative |
| P13987 | CYNCPNPTADCKTAVNCSSD | Negative |
| P13987 | LLLVLAVFCHSGHSLQCYNC | Negative |
| P13987 | LVAVFCHSGHSLQCYNCNP  | Negative |
| P13987 | GIQGGSVLFGLLLVLAVFCH | Negative |

|        |                      |          |
|--------|----------------------|----------|
| P13987 | LQCYNCPNPTADCKTAVNCS | Negative |
| P13987 | HSLQCYNCPNPTADCKTAVN | Negative |
| P13987 | GGSVLFGLLLVLAVFCHSGH | Negative |
| P13987 | FGLLLVLAVFCHSGHSLQCY | Negative |
| P13987 | LAVFCHSGHSLQCYNCPNPT | Negative |
| P13987 | LLVLAVFCHSGHSLQCYNCP | Negative |
| P13987 | GSVLFGLLLVLAVFCHSGHS | Negative |
| P13987 | SGHSLQCYNCPNPTADCKTA | Negative |
| P13987 | HSGHSLQCYNCPNPTADCKT | Negative |
| P13987 | MGIQGGSVLFGLLLVLAVFC | Negative |
| P13987 | FCHSGHSLQCYNCPNPTADC | Negative |
| P13987 | SLQCYNCPNPTADCKTAVNC | Negative |
| P13987 | VLFGLLLVLAVFCHSGHSLQ | Negative |
| P13987 | IQGGSVLFGLLLVLAVFCHS | Negative |
| P14090 | AGSGTALAASPIGEGTFDDG | Negative |
| P14090 | ALAASPIGEGTFDDGPEGWV | Negative |
| P14090 | SSQARGALTAVVATLALALA | Negative |
| P14090 | LALALAGSGTALAASPIGEG | Negative |
| P14090 | VATLALALAGSGTALAASPI | Negative |
| P14090 | RGALTAVVATLALALAGSGT | Negative |
| P14090 | VVATLALALAGSGTALAASP | Negative |
| P14090 | ALAGSGTALAASPIGEGTFD | Negative |
| P14090 | SGTALAASPIGEGTFDDGPE | Negative |
| P14090 | SRRSSQARGALTAVVATLAL | Negative |
| P14090 | ALALAGSGTALAASPIGEGT | Negative |
| P14090 | TAVVATLALALAGSGTALAA | Negative |
| P14090 | LALAGSGTALAASPIGEGTF | Negative |
| P14090 | LAGSGTALAASPIGEGTFDD | Negative |
| P14090 | TALAASPIGEGTFDDGPEGW | Negative |
| P14090 | ALTAVVATLALALAGSGTAL | Negative |
| P14090 | GALTAVVATLALALAGSGTA | Negative |
| P14090 | ARGALTAVVATLALALAGSG | Negative |
| P14090 | LTAVVATLALALAGSGTALA | Negative |
| P14090 | VSRSSQARGALTAVVATLA  | Negative |
| P14090 | RSSQARGALTAVVATLALAL | Negative |
| P14090 | MVSRSSQARGALTAVVATL  | Negative |
| P14090 | RRSSQARGALTAVVATLALA | Negative |
| P14090 | GSGTALAASPIGEGTFDDGP | Negative |
| P14090 | TLALALAGSGTALAASPIGE | Negative |
| P14090 | AVVATLALALAGSGTALAAS | Negative |
| P14090 | GTALAASPIGEGTFDDGPEG | Negative |
| P14090 | QARGALTAVVATLALALAGS | Negative |
| P14090 | SQARGALTAVVATLALALAG | Negative |
| P14091 | QGSLHRVPLRRHPSLKKLR  | Negative |
| P14091 | LLVLLELGEAQGSLHRVPL  | Negative |
| P14091 | LELGEAQGSLHRVPLRRHPS | Negative |

|        |                      |          |
|--------|----------------------|----------|
| P14091 | LHRVPLRRHPSLKKKLRARS | Negative |
| P14091 | SLHRVPLRRHPSLKKKLRAR | Negative |
| P14091 | LGEAQGSLHRVPLRRHPSLK | Negative |
| P14091 | RRHPSLKKKLRARSQSEFW  | Negative |
| P14091 | HRVPLRRHPSLKKKLRARSQ | Negative |
| P14091 | AQGSLHRVPLRRHPSLKKKL | Negative |
| P14091 | MKTLLLLLLVLLELGEAQGS | Negative |
| P14091 | LLELGEAQGSLHRVPLRRHP | Negative |
| P14091 | RVPLRRHPSLKKKLRARSQ  | Negative |
| P14091 | LLLLLLVLLELGEAQGSLHR | Negative |
| P14091 | LLLVLLELGEAQGSLHRVP  | Negative |
| P14091 | GEAQGSLHRVPLRRHPSLKK | Negative |
| P14091 | RHPSLKKKLRARSQSEFWK  | Negative |
| P14091 | PLRRHPSLKKKLRARSQSE  | Negative |
| P14091 | LLVLLELGEAQGSLHRVPLR | Negative |
| P14091 | VPLRRHPSLKKKLRARSQ   | Negative |
| P14091 | LRRHPSLKKKLRARSQSEF  | Negative |
| P14091 | KTLLLLLLVLLELGEAQGSL | Negative |
| P14091 | LVLELGEAQGSLHRVPLRR  | Negative |
| P14091 | HPSLKKKLRARSQSEFWKS  | Negative |
| P14091 | ELGEAQGSLHRVPLRRHPSL | Negative |
| P14091 | VLLELGEAQGSLHRVPLRRH | Negative |
| P14091 | GSLHRVPLRRHPSLKKKLRA | Negative |
| P14091 | EAQGSLHRVPLRRHPSLKKK | Negative |
| P14091 | TLLLLLLVLLELGEAQGSLH | Negative |
| P14091 | PSLKKKLRARSQSEFWKSH  | Negative |
| P14095 | GAPVANELRCQCLQTVAGIH | Negative |
| P14095 | TGAPVANELRCQCLQTVAGI | Negative |
| P14095 | APVANELRCQCLQTVAGIHF | Negative |
| P14095 | VANELRCQCLQTVAGIHFKN | Negative |
| P14095 | RSLCAALPVLATSRQATGA  | Negative |
| P14095 | VLATSRQATGAPVANELRCQ | Negative |
| P14095 | LLCAALPVLATSRQATGAPV | Negative |
| P14095 | ALPVLATSRQATGAPVANEL | Negative |
| P14095 | ANELRCQCLQTVAGIHFKNI | Negative |
| P14095 | ELRCQCLQTVAGIHFKNIQS | Negative |
| P14095 | LCAALPVLATSRQATGAPVA | Negative |
| P14095 | NELRCQCLQTVAGIHFKNIQ | Negative |
| P14095 | VSATRSLCAALPVLATSRQ  | Negative |
| P14095 | ATSRQATGAPVANELRCQCL | Negative |
| P14095 | SLLCAALPVLATSRQATGAP | Negative |
| P14095 | TRSLCAALPVLATSRQATG  | Negative |
| P14095 | RQATGAPVANELRCQCLQTV | Negative |
| P14095 | AALPVLATSRQATGAPVANE | Negative |
| P14095 | MVSATRSLCAALPVLATSR  | Negative |
| P14095 | ATGAPVANELRCQCLQTVAG | Negative |

|        |                       |          |
|--------|-----------------------|----------|
| P14095 | SATRSLLCAALPVLATSRQA  | Negative |
| P14095 | PVANELRCQCLQTVAGIHF   | Negative |
| P14095 | LPVLATSRQATGAPVANELR  | Negative |
| P14095 | QATGAPVANELRCQCLQTV   | Negative |
| P14095 | TSRQATGAPVANELRCQCLQ  | Negative |
| P14095 | PVLATSRQATGAPVANELRC  | Negative |
| P14095 | LATSRQATGAPVANELRCQC  | Negative |
| P14095 | ATRSLLCAALPVLATSRQAT  | Negative |
| P14095 | SRQATGAPVANELRCQCLQT  | Negative |
| P14133 | ADKPFFPKPFLSFLVLSIIF  | Negative |
| P14133 | IIFGFGITLSEAGFPKIKHY  | Negative |
| P14133 | FGFGITLSEAGFPKIKHYKW  | Negative |
| P14133 | DKPFFPKPFLSFLVLSIIFG  | Negative |
| P14133 | IFGFGITLSEAGFPKIKHYK  | Negative |
| P14133 | ITLSEAGFPKIKHYKWDVEY  | Negative |
| P14133 | GITLSEAGFPKIKHYKWDVE  | Negative |
| P14133 | LSEAGFPKIKHYKWDVEYMF  | Negative |
| P14133 | KPFLSFLVLSIIFGFGITLS  | Negative |
| P14133 | KVADKPFFPKPFLSFLVLSI  | Negative |
| P14133 | SFLVLSIIFGFGITLSEAGF  | Negative |
| P14133 | LSFLVLSIIFGFGITLSEAG  | Negative |
| P14133 | LSIIFGFGITLSEAGFPKIK  | Negative |
| P14133 | PFFPKPFLSFLVLSIIFGFG  | Negative |
| P14133 | FLSFLVLSIIFGFGITLSEA  | Negative |
| P14133 | FGITLSEAGFPKIKHYKWDV  | Negative |
| P14133 | FFPKPFLSFLVLSIIFGFGI  | Negative |
| P14133 | LVLSIIFGFGITLSEAGFPK  | Negative |
| P14133 | PKPFLSFLVLSIIFGFGITL  | Negative |
| P14133 | MAKVADKPFFPKPFLSFLVL  | Negative |
| P14133 | FLVLSIIFGFGITLSEAGFP  | Negative |
| P14133 | GFGITLSEAGFPKIKHYKWD  | Negative |
| P14133 | FPKPFLSFLVLSIIFGFGIT  | Negative |
| P14133 | VADKPFFPKPFLSFLVLSII  | Negative |
| P14133 | SIIFGFGITLSEAGFPKIKH  | Negative |
| P14133 | KPFFPKPFLSFLVLSIIFGF  | Negative |
| P14133 | AKVADKPFFPKPFLSFLVLS  | Negative |
| P14133 | TLSEAGFPKIKHYKWDVEYM  | Negative |
| P14133 | PFLSFLVLSIIFGFGITLSE  | Negative |
| P14170 | GNLRSSFVFFLLALVTYTYA  | Negative |
| P14170 | LVTYTYAATIEVRNNCPYTV  | Negative |
| P14170 | YTYAATIEVRNNCPYTVWAA  | Negative |
| P14170 | LLALVTYTYAATIEVRNNCP  | Negative |
| P14170 | FVFFLLALVTYTYAATIEVR  | Negative |
| P14170 | CPYTVWAASTPIGGGRRLLDR | Negative |
| P14170 | IEVRNNCPYTVWAASTPIGG  | Negative |
| P14170 | TYAATIEVRNNCPYTVWAAS  | Negative |

|        |                      |          |
|--------|----------------------|----------|
| P14170 | YAATIEVRNNCPYTVWAAST | Negative |
| P14170 | NNCPYTVWAASTPIGGGRR  | Negative |
| P14170 | FLLALVTYTYAATIEVRNNC | Negative |
| P14170 | RNNCPYTVWAASTPIGGGRR | Negative |
| P14170 | TYTYAATIEVRNNCPYTVWA | Negative |
| P14170 | SSFVFFLLALVTYTYAATIE | Negative |
| P14170 | AATIEVRNNCPYTVWAASTP | Negative |
| P14170 | EVRNNCPYTVWAASTPIGGG | Negative |
| P14170 | TIEVRNNCPYTVWAASTPIG | Negative |
| P14170 | FFLLALVTYTYAATIEVRNN | Negative |
| P14170 | NCPYTVWAASTPIGGGRRLD | Negative |
| P14170 | NLRSSFVFFLLALVTYTYAA | Negative |
| P14170 | LALVTYTYAATIEVRNNCPY | Negative |
| P14170 | ALVTYTYAATIEVRNNCPYT | Negative |
| P14170 | RSSFVFFLLALVTYTYAATI | Negative |
| P14170 | VRNNCPYTVWAASTPIGGGR | Negative |
| P14170 | LRSSFVFFLLALVTYTYAAT | Negative |
| P14170 | MGNLRSSFVFFLLALVTYTY | Negative |
| P14170 | VTYTYAATIEVRNNCPYTVW | Negative |
| P14170 | VFFLLALVTYTYAATIEVRN | Negative |
| P14170 | ATIEVRNNCPYTVWAASTPI | Negative |
| P14210 | LLLPIAIPYAEGQRKRRNTI | Negative |
| P14210 | HVLLHLLLPIAIPYAEGQR  | Negative |
| P14210 | IPYAEGQRKRRNTIHEFKKS | Negative |
| P14210 | LLQHVLHLLLPIAIPYAE   | Negative |
| P14210 | LPIAIPYAEGQRKRRNTIHE | Negative |
| P14210 | LPALLLQHVLHLLLPIAI   | Negative |
| P14210 | HLLLPIAIPYAEGQRKRRN  | Negative |
| P14210 | EGQRKRRNTIHEFKKSAKTT | Negative |
| P14210 | AEGQRKRRNTIHEFKKSAKT | Negative |
| P14210 | LQHVLHLLLPIAIPYAEG   | Negative |
| P14210 | IAIPYAEGQRKRRNTIHEFK | Negative |
| P14210 | YAEGQRKRRNTIHEFKKSAK | Negative |
| P14210 | PIAIPYAEGQRKRRNTIHEF | Negative |
| P14210 | KLLPALLLQHVLHLLLPI   | Negative |
| P14210 | AIPYAEGQRKRRNTIHEFKK | Negative |
| P14210 | QHVLHLLLPIAIPYAEGQ   | Negative |
| P14210 | MWVTKLLPALLLQHVLHLL  | Negative |
| P14210 | VTKLLPALLLQHVLHLLL   | Negative |
| P14210 | LLPALLLQHVLHLLLPIA   | Negative |
| P14210 | PALLLQHVLHLLLPIAIP   | Negative |
| P14210 | VLLHLLLPIAIPYAEGQRK  | Negative |
| P14210 | LLLPIAIPYAEGQRKRRNT  | Negative |
| P14210 | ALLQHVLHLLLPIAIPY    | Negative |
| P14210 | LLPIAIPYAEGQRKRRNTIH | Negative |
| P14210 | TKLLPALLLQHVLHLLLP   | Negative |

|        |                      |          |
|--------|----------------------|----------|
| P14210 | WVTKLLPALLLQHVLLHLLL | Negative |
| P14210 | LLHLLLLPIAIPYAEGQRKR | Negative |
| P14210 | PYAEGQRKRRNTIHEFKKSA | Negative |
| P14210 | LLLQHVLLHLLLLPIAIPYA | Negative |
| P14212 | ADINTETSGKVTFFGKVVEN | Negative |
| P14212 | GSLILLAFAGNVQADINTET | Negative |
| P14212 | NTETSGKVTFFGKVVENTCK | Negative |
| P14212 | SLILLAFAGNVQADINTETS | Negative |
| P14212 | MKKTLLGSLILLAFAGNVQA | Negative |
| P14212 | TSGKVTFFGKVVENTCKVKT | Negative |
| P14212 | FAGNVQADINTETSGKVTFF | Negative |
| P14212 | LLGSLILLAFAGNVQADINT | Negative |
| P14212 | VQADINTETSGKVTFFGKVV | Negative |
| P14212 | INTETSGKVTFFGKVVENTC | Negative |
| P14212 | ILLAFAGNVQADINTETSGK | Negative |
| P14212 | KTLLGSLILLAFAGNVQADI | Negative |
| P14212 | LLAFAGNVQADINTETSGKV | Negative |
| P14212 | GKVTFFGKVVENTCKVKTEH | Negative |
| P14212 | VTFFGKVVENTCKVKTEHKN | Negative |
| P14212 | KVTFFGKVVENTCKVKTEHK | Negative |
| P14212 | LAFAGNVQADINTETSGKVT | Negative |
| P14212 | LILLAFAGNVQADINTETSG | Negative |
| P14212 | NVQADINTETSGKVTFFGKV | Negative |
| P14212 | KKTLLGSLILLAFAGNVQAD | Negative |
| P14212 | TLLGSLILLAFAGNVQADIN | Negative |
| P14212 | ETSGKVTFFGKVVENTCKVK | Negative |
| P14212 | DINTETSGKVTFFGKVVENT | Negative |
| P14212 | GNVQADINTETSGKVTFFGK | Negative |
| P14212 | TETSGKVTFFGKVVENTCKV | Negative |
| P14212 | SGKVTFFGKVVENTCKVKTE | Negative |
| P14212 | AFAGNVQADINTETSGKVTF | Negative |
| P14212 | AGNVQADINTETSGKVTFFG | Negative |
| P14212 | QADINTETSGKVTFFGKVVE | Negative |
| P14213 | MVEEAEAKWCFRVCYRGICY | Negative |
| P14213 | MMVLAVMVEEAEAKWCFRVC | Negative |
| P14213 | CYRGICYRRCRGKRNEVRQY | Negative |
| P14213 | LCLMMVLAVMVEEAEAKWCF | Negative |
| P14213 | KWCFRVCYRGICYRRCRGKR | Negative |
| P14213 | VCYRGICYRRCRGKRNEVRQ | Negative |
| P14213 | MVLAVMVEEAEAKWCFRVCY | Negative |
| P14213 | VEEAEAKWCFRVCYRGICYR | Negative |
| P14213 | LVIALCLMMVLAVMVEEAEA | Negative |
| P14213 | EAEAKWCFRVCYRGICYRRC | Negative |
| P14213 | VIALCLMMVLAVMVEEAEAK | Negative |
| P14213 | RVCYRGICYRRCRGKRNEVR | Negative |
| P14213 | KKLVIALCLMMVLAVMVEEA | Negative |

|        |                       |          |
|--------|-----------------------|----------|
| P14213 | ALCLMMVLAVMVEEAEAKWC  | Negative |
| P14213 | EEAEAKWCFRVCYRGICYRR  | Negative |
| P14213 | CFRVCYRGICYRRRCRGKRNE | Negative |
| P14213 | IALCLMMVLAVMVEEAEAKW  | Negative |
| P14213 | LMMVLAVMVEEAEAKWCFRV  | Negative |
| P14213 | KLVIALCLMMVLAVMVEEAE  | Negative |
| P14213 | MKKLVIALCLMMVLAVMVEE  | Negative |
| P14213 | LAVMVEEAEAKWCFRVCYRG  | Negative |
| P14213 | AEAKWCFRVCYRGICYRRCR  | Negative |
| P14213 | FRVCYRGICYRRRCRGKRNEV | Negative |
| P14213 | WCFRVCYRGICYRRRCRGKRN | Negative |
| P14213 | AVMVEEAEAKWCFRVCYRGI  | Negative |
| P14213 | AKWCFRVCYRGICYRRRCRGK | Negative |
| P14213 | VMVEEAEAKWCFRVCYRGIC  | Negative |
| P14213 | EAKWCFRVCYRGICYRRCRG  | Negative |
| P14213 | VLAVMVEEAEAKWCFRVCYR  | Negative |
| P14214 | VCYRGICYRKCRGKRNEVRQ  | Negative |
| P14214 | ALCLMMVLAVMVEEAEARWC  | Negative |
| P14214 | IALCLMMVLAVMVEEAEARW  | Negative |
| P14214 | ARWCFRVCYRGICYRKCRGK  | Negative |
| P14214 | RVCYRGICYRKCRGKRNEVR  | Negative |
| P14214 | MMVLAVMVEEAEARWCFRVC  | Negative |
| P14214 | VLAVMVEEAEARWCFRVCYR  | Negative |
| P14214 | LCLMMVLAVMVEEAEARWCF  | Negative |
| P14214 | MVEEAEARWCFRVCYRGICY  | Negative |
| P14214 | MKKLVIALCLMMVLAVMVEE  | Negative |
| P14214 | CFRVCYRGICYRKCRGKRNE  | Negative |
| P14214 | AEARWCFRVCYRGICYRKCR  | Negative |
| P14214 | LMMVLAVMVEEAEARWCFRV  | Negative |
| P14214 | AVMVEEAEARWCFRVCYRGI  | Negative |
| P14214 | FRVCYRGICYRKCRGKRNEV  | Negative |
| P14214 | RWCFRVCYRGICYRKCRGKR  | Negative |
| P14214 | EEAEARWCFRVCYRGICYRK  | Negative |
| P14214 | VIALCLMMVLAVMVEEAEAR  | Negative |
| P14214 | LVIALCLMMVLAVMVEEAEA  | Negative |
| P14214 | KLVIALCLMMVLAVMVEEAE  | Negative |
| P14214 | MVLAVMVEEAEARWCFRVCY  | Negative |
| P14214 | WCFRVCYRGICYRKCRGKRN  | Negative |
| P14214 | VEEAEARWCFRVCYRGICYR  | Negative |
| P14214 | CYRGICYRKCRGKRNEVRQY  | Negative |
| P14214 | KKL VIALCLMMVLAVMVEEA | Negative |
| P14214 | VMVEEAEARWCFRVCYRGIC  | Negative |
| P14214 | EARWCFRVCYRGICYRKCRG  | Negative |
| P14214 | EAEARWCFRVCYRGICYRKC  | Negative |
| P14214 | LAVMVEEAEARWCFRVCYRG  | Negative |
| P14384 | QEGMEAFLKTVAQNYSSVTH  | Negative |

|        |                       |          |
|--------|-----------------------|----------|
| P14384 | NYHRQEGME AFLKTVAQNYS | Negative |
| P14384 | FNYHRQEGME AFLKTVAQNY | Negative |
| P14384 | LWLGLLLPLVAALDFNYHRQ  | Negative |
| P14384 | MDFPCLWLGLLLPLVAALDF  | Negative |
| P14384 | GME AFLKTVAQNYSSVTHLH | Negative |
| P14384 | LVAALDFNYHRQEGME AFLK | Negative |
| P14384 | HRQEGME AFLKTVAQNYSSV | Negative |
| P14384 | LLPLVAALDFNYHRQEGMEA  | Negative |
| P14384 | PCLWLGLLLPLVAALDFNYH  | Negative |
| P14384 | EGME AFLKTVAQNYSSVTHL | Negative |
| P14384 | WLGLLLPLVAALDFNYHRQE  | Negative |
| P14384 | RQEGME AFLKTVAQNYSSVT | Negative |
| P14384 | LPLVAALDFNYHRQEGMEAF  | Negative |
| P14384 | CLWLGLLLPLVAALDFNYHR  | Negative |
| P14384 | E AFLKTVAQNYSSVTHLHSI | Negative |
| P14384 | LGLLLPLVAALDFNYHRQEG  | Negative |
| P14384 | LLLPLVAALDFNYHRQEGME  | Negative |
| P14384 | GLLLPLVAALDFNYHRQEGM  | Negative |
| P14384 | ME AFLKTVAQNYSSVTHLHS | Negative |
| P14384 | ALDFNYHRQEGME AFLKTVA | Negative |
| P14384 | PLVAALDFNYHRQEGME AFL | Negative |
| P14384 | VAALDFNYHRQEGME AFLKT | Negative |
| P14384 | YHRQEGME AFLKTVAQNYSS | Negative |
| P14384 | AALDFNYHRQEGME AFLKTV | Negative |
| P14384 | LDFNYHRQEGME AFLKTVAQ | Negative |
| P14384 | AFLKTVAQNYSSVTHLHSIG  | Negative |
| P14384 | DFNYHRQEGME AFLKTVAQN | Negative |
| P14384 | DFPCLWLGLLLPLVAALDFN  | Negative |
| P14423 | GSLLFEGQMILFKTGKRA DV | Negative |
| P14423 | SIQVQGSLLFEGQMILFKTG  | Negative |
| P14423 | MAFGSIQVQGSLLFEGQMIL  | Negative |
| P14423 | EFGQMILFKTGKRA DVSYGF | Negative |
| P14423 | VVIMAFGSIQVQGSLLFEGQ  | Negative |
| P14423 | GSIQVQGSLLFEGQMILFKT  | Negative |
| P14423 | VQGSLLFEGQMILFKTGKRA  | Negative |
| P14423 | QGSLLFEGQMILFKTGKRA D | Negative |
| P14423 | FGQMILFKTGKRA DVSYGFY | Negative |
| P14423 | LLAVVIMAFGSIQVQGSLL   | Negative |
| P14423 | LLLAVVIMAFGSIQVQGS    | Negative |
| P14423 | IQVQGSLLFEGQMILFKTGK  | Negative |
| P14423 | ILFKTGKRA DVSYGFYGCHC | Negative |
| P14423 | GQMILFKTGKRA DVSYGFY  | Negative |
| P14423 | LLEFGQMILFKTGKRA DVSY | Negative |
| P14423 | AFGSIQVQGSLLFEGQMILF  | Negative |
| P14423 | LEFGQMILFKTGKRA DVSYG | Negative |
| P14423 | QMILFKTGKRA DVSYGFYGC | Negative |



|        |                       |          |
|--------|-----------------------|----------|
| P14423 | FGSIQVQGSLLLEFGQMILFK | Negative |
| P14423 | SLLEFGQMILFKTGKRADVS  | Negative |
| P14423 | QVQGSLLLEFGQMILFKTGKR | Negative |
| P14423 | LLLAVVIMAFGSIQVQGSLL  | Negative |
| P14423 | VIMAFGSIQVQGSLLLEFGQM | Negative |
| P14423 | AVVIMAFGSIQVQGSLLLEFG | Negative |
| P14423 | IMAFGSIQVQGSLLLEFGQMI | Negative |
| P14423 | VLLLLAVVIMAFGSIQVQGS  | Negative |
| P14423 | KVLLLLAVVIMAFGSIQVQG  | Negative |
| P14423 | MILFKTGKRADVSYGFYGC   | Negative |
| P14423 | MKVLLLLAVVIMAFGSIQVQ  | Negative |
| P14424 | VEGSLLEFGMMILGETGKNP  | Negative |
| P14424 | ILGETGKNPLTSYFYGCYC   | Negative |
| P14424 | CLIGVEGSLLEFGMMILGET  | Negative |
| P14424 | LEFGMMILGETGKNPLTSYS  | Negative |
| P14424 | LWIVAVCLIGVEGSLLEFGM  | Negative |
| P14424 | GETGKNPLTSYFYGCYCGV   | Negative |
| P14424 | MMILGETGKNPLTSYFYGC   | Negative |
| P14424 | TGKNPLTSYFYGCYCGVGG   | Negative |
| P14424 | FGMMILGETGKNPLTSYFY   | Negative |
| P14424 | EFGMMILGETGKNPLTSYSF  | Negative |
| P14424 | GVEGSLLEFGMMILGETGKN  | Negative |
| P14424 | MILGETGKNPLTSYFYGCY   | Negative |
| P14424 | GKNPLTSYFYGCYCGVGGK   | Negative |
| P14424 | EGSLLEFGMMILGETGKNPL  | Negative |
| P14424 | GMMILGETGKNPLTSYFYG   | Negative |
| P14424 | LLEFGMMILGETGKNPLTSY  | Negative |
| P14424 | VAVCLIGVEGSLLEFGMMIL  | Negative |
| P14424 | LIGVEGSLLEFGMMILGETG  | Negative |
| P14424 | GSLLLEFGMMILGETGKNPLT | Negative |
| P14424 | AVCLIGVEGSLLEFGMMILG  | Negative |
| P14424 | ETGKNPLTSYFYGCYCGVG   | Negative |
| P14424 | LGETGKNPLTSYFYGCYCG   | Negative |
| P14424 | SLLEFGMMILGETGKNPLTS  | Negative |
| P14424 | MRTLWIVAVCLIGVEGSLLE  | Negative |
| P14424 | VCLIGVEGSLLEFGMMILGE  | Negative |
| P14424 | IVAVCLIGVEGSLLEFGMMI  | Negative |
| P14424 | WIVAVCLIGVEGSLLEFGMM  | Negative |
| P14424 | IGVEGSLLEFGMMILGETGK  | Negative |
| P14424 | TLWIVAVCLIGVEGSLLEFG  | Negative |
| P14448 | ILCVLLCLNLAWAQDGKTTF  | Negative |
| P14448 | CLNLAWAQDGKTTFEKEGGG  | Negative |
| P14448 | AWAQDGKTTFEKEGGGGGRP  | Negative |
| P14448 | GGGRGPRILENMHESSCKYE  | Negative |
| P14448 | PVTILCVLLCLNLAWAQDGK  | Negative |
| P14448 | MIPVTILCVLLCLNLAWAQD  | Negative |

|        |                       |          |
|--------|-----------------------|----------|
| P14448 | LAWAQDGKTTFEKEGGGGRG  | Negative |
| P14448 | KTTFEKEGGGGRGPRILENM  | Negative |
| P14448 | NLAWAQDGKTTFEKEGGGGR  | Negative |
| P14448 | EKEGGGGRGPRILENMHESS  | Negative |
| P14448 | GKTTFEKEGGGGRGPRILEN  | Negative |
| P14448 | LLCLNLAWAQDGKTTFEKEG  | Negative |
| P14448 | IPVTILCVLLCLNLAWAQDG  | Negative |
| P14448 | QDGKTTFEKEGGGGRGPRIL  | Negative |
| P14448 | DGKTTFEKEGGGGRGPRILE  | Negative |
| P14448 | KEGGGGRGPRILENMHESSC  | Negative |
| P14448 | LCVLLCLNLAWAQDGKTTFE  | Negative |
| P14448 | VLLCLNLAWAQDGKTTFEKE  | Negative |
| P14448 | TFEKEGGGGRGPRILENMHE  | Negative |
| P14448 | EGGGGRGPRILENMHESSCK  | Negative |
| P14448 | LNLAWAQDGKTTFEKEGGGG  | Negative |
| P14448 | FEKEGGGGRGPRILENMHES  | Negative |
| P14448 | GGGGGRGPRILENMHESSCKY | Negative |
| P14448 | CVLLCLNLAWAQDGKTTFEK  | Negative |
| P14448 | TTFEKEGGGGRGPRILENMH  | Negative |
| P14448 | WAQDGKTTFEKEGGGGRGPR  | Negative |
| P14448 | TILCVLLCLNLAWAQDGKTT  | Negative |
| P14448 | LCLNLAWAQDGKTTFEKEGG  | Negative |
| P14448 | AQDGKTTFEKEGGGGRGPRI  | Negative |
| P14529 | AAACAVTMTAVPALSTPEPE  | Negative |
| P14529 | VTMTAVPALSTPEPEAAGVV  | Negative |
| P14529 | GKLRKNLLAWAGTGVAACA   | Negative |
| P14529 | WAGTGVAACAVTMTAVPAL   | Negative |
| P14529 | GVAACAVTMTAVPALSTPE   | Negative |
| P14529 | LRKNLLAWAGTGVAACAVT   | Negative |
| P14529 | AVPALSTPEPEAAGVVSASP  | Negative |
| P14529 | LSTPEPEAAGVVSASPYLYN  | Negative |
| P14529 | KNLLAWAGTGVAACAVTMT   | Negative |
| P14529 | MTAVPALSTPEPEAAGVVS   | Negative |
| P14529 | NLLAWAGTGVAACAVTMTA   | Negative |
| P14529 | AWAGTGVAACAVTMTAVPA   | Negative |
| P14529 | LAWAGTGVAACAVTMTAVP   | Negative |
| P14529 | TAVPALSTPEPEAAGVVSAS  | Negative |
| P14529 | KLRKNLLAWAGTGVAACAV   | Negative |
| P14529 | VPALSTPEPEAAGVVSASPY  | Negative |
| P14529 | CAVTMTAVPALSTPEPEAAG  | Negative |
| P14529 | PALSTPEPEAAGVVSASPYL  | Negative |
| P14529 | MGKLRKNLLAWAGTGVAAC   | Negative |
| P14529 | TMTAVPALSTPEPEAAGVVS  | Negative |
| P14529 | TGVAACAVTMTAVPALSTP   | Negative |
| P14529 | RKNLLAWAGTGVAACAVTM   | Negative |
| P14529 | VAAACAVTMTAVPALSTPEP  | Negative |

|        |                       |          |
|--------|-----------------------|----------|
| P14529 | GTGVAAACAVTMTAVPALST  | Negative |
| P14529 | AGTGVAACAVTMTAVPALS   | Negative |
| P14529 | ALSTPEPEAAAGVVSASPYLY | Negative |
| P14529 | ACAVTMTAVPALSTPEPEAA  | Negative |
| P14529 | AACAVTMTAVPALSTPEPEA  | Negative |
| P14529 | LLAWAGTGVAACAVTMTAV   | Negative |
| P14532 | LHDQASALFKPIPEQVTELRL | Negative |
| P14532 | SLLLSFATPLAQADALHDQA  | Negative |
| P14532 | LPLGSLLSFATPLAQADAL   | Negative |
| P14532 | SQLLPLGSLLSFATPLAQA   | Negative |
| P14532 | HDQASALFKPIPEQVTELRG  | Negative |
| P14532 | QADALHDQASALFKPIPEQV  | Negative |
| P14532 | MQSSQLLPLGSLLSFATPL   | Negative |
| P14532 | TPLAQADALHDQASALFKPI  | Negative |
| P14532 | QSSQLLPLGSLLSFATPLA   | Negative |
| P14532 | GSLLSFATPLAQADALHDQ   | Negative |
| P14532 | PLGSLLSFATPLAQADALH   | Negative |
| P14532 | FATPLAQADALHDQASALFK  | Negative |
| P14532 | AQADALHDQASALFKPIPEQ  | Negative |
| P14532 | SFATPLAQADALHDQASALF  | Negative |
| P14532 | ADALHDQASALFKPIPEQVT  | Negative |
| P14532 | PLAQADALHDQASALFKPIP  | Negative |
| P14532 | LAQADALHDQASALFKPIPE  | Negative |
| P14532 | SSQLLPLGSLLSFATPLAQ   | Negative |
| P14532 | DALHDQASALFKPIPEQVTE  | Negative |
| P14532 | LLSFATPLAQADALHDQASA  | Negative |
| P14532 | ASALFKPIPEQVTELRGQPI  | Negative |
| P14532 | QLLPLGSLLSFATPLAQAD   | Negative |
| P14532 | DQASALFKPIPEQVTELRGQ  | Negative |
| P14532 | LLLSFATPLAQADALHDQAS  | Negative |
| P14532 | QASALFKPIPEQVTELRGQP  | Negative |
| P14532 | LSFATPLAQADALHDQASAL  | Negative |
| P14532 | ALHDQASALFKPIPEQVTEL  | Negative |
| P14532 | ATPLAQADALHDQASALFKP  | Negative |
| P14532 | LLPLGSLLSFATPLAQADA   | Negative |
| P14555 | IMIFGLLQAHGNLVNFHRMI  | Negative |
| P14555 | NLVNFHRMIKLTTGKEAALS  | Negative |
| P14555 | FGLLQAHGNLVNFHRMIKLT  | Negative |
| P14555 | HGNLVNFHRMIKLTTGKEAA  | Negative |
| P14555 | LQAHGNLVNFHRMIKLTTGK  | Negative |
| P14555 | LAVIMIFGLLQAHGNLVNFH  | Negative |
| P14555 | VNFHRMIKLTTGKEAALSYG  | Negative |
| P14555 | KTLLLLAVIMIFGLLQAHGN  | Negative |
| P14555 | LLAVIMIFGLLQAHGNLVN   | Negative |
| P14555 | KLTTGKEAALSYGYGCHCG   | Negative |
| P14555 | GLLQAHGNLVNFHRMIKLTT  | Negative |

|        |                      |          |
|--------|----------------------|----------|
| P14555 | IKLTTGKEAALSYGFGCHC  | Negative |
| P14555 | IFGLLQAHGNLVNFHRMIKL | Negative |
| P14555 | MKTLLLLAVIMIFGLLQAHG | Negative |
| P14555 | AVIMIFGLLQAHGNLVNFHR | Negative |
| P14555 | VIMIFGLLQAHGNLVNFHRM | Negative |
| P14555 | GNLVNFHRMIKLTTGKEAAL | Negative |
| P14555 | LLLLAVIMIFGLLQAHGNLV | Negative |
| P14555 | MIKLTTGKEAALSYGFGCH  | Negative |
| P14555 | FHRMIKLTTGKEAALSYGFY | Negative |
| P14555 | QAHGNLVNFHRMIKLTTGKE | Negative |
| P14555 | HRMIKLTTGKEAALSYGFG  | Negative |
| P14555 | RMIKLTTGKEAALSYGFGC  | Negative |
| P14555 | NFHRMIKLTTGKEAALSYG  | Negative |
| P14555 | MIFGLLQAHGNLVNFHRMIK | Negative |
| P14555 | LLQAHGNLVNFHRMIKLTTG | Negative |
| P14555 | LVNFHRMIKLTTGKEAALS  | Negative |
| P14555 | AHGNLVNFHRMIKLTTGKEA | Negative |
| P14555 | TLLLLAVIMIFGLLQAHGNL | Negative |
| P14612 | LLTLVVVTIMCLDLGYTLT  | Negative |
| P14612 | LLTLVVVTIMCLDLGYTLTC | Negative |
| P14612 | GRDRSSETCRSEQELCCTKT | Negative |
| P14612 | VVTIMCLDLGYTLTCYKGRD | Negative |
| P14612 | DLGYTLTCYKGRDRSSETCR | Negative |
| P14612 | CLDLGYTLTCYKGRDRSSET | Negative |
| P14612 | LDLGYTLTCYKGRDRSSETC | Negative |
| P14612 | TLTCYKGRDRSSETCRSEQE | Negative |
| P14612 | LTCYKGRDRSSETCRSEQEL | Negative |
| P14612 | GYTLTCYKGRDRSSETCRSE | Negative |
| P14612 | CYKGRDRSSETCRSEQELCC | Negative |
| P14612 | VVVTIMCLDLGYTLTCYKGR | Negative |
| P14612 | LGYTLTCYKGRDRSSETCRS | Negative |
| P14612 | YTLTCYKGRDRSSETCRSEQ | Negative |
| P14612 | MKTLLTLVVVTIMCLDLGY  | Negative |
| P14612 | YKGRDRSSETCRSEQELCCT | Negative |
| P14612 | MCLDLGYTLTCYKGRDRSSE | Negative |
| P14612 | LVVVTIMCLDLGYTLTCYKG | Negative |
| P14612 | KTLLTLVVVTIMCLDLGYT  | Negative |
| P14612 | TCYKGRDRSSETCRSEQELC | Negative |
| P14612 | TIMCLDLGYTLTCYKGRDRS | Negative |
| P14612 | RSSETCRSEQELCCTKTWCD | Negative |
| P14612 | TLLTLVVVTIMCLDLGYTL  | Negative |
| P14612 | KGRDRSSETCRSEQELCCTK | Negative |
| P14612 | DRSSETCRSEQELCCTKTWC | Negative |
| P14612 | VTIMCLDLGYTLTCYKGRDR | Negative |
| P14612 | LTLVVVTIMCLDLGYTLTCY | Negative |
| P14612 | RDRSSETCRSEQELCCTKTW | Negative |

|        |                       |          |
|--------|-----------------------|----------|
| P14612 | IMCLDLGYTLTCYKGRDRSS  | Negative |
| P14625 | VRADDEVDVDGTVEEDLGKS  | Negative |
| P14625 | DVDGTVEEDLGKSREGSRTD  | Negative |
| P14625 | TFGSVRADDEVDVDGTVEED  | Negative |
| P14625 | GTVEEDLGKSREGSRTDDEV  | Negative |
| P14625 | GLCCVLLTFGSVRADDEVDV  | Negative |
| P14625 | LCCVLLTFGSVRADDEVDVD  | Negative |
| P14625 | VLGLCCVLLTFGSVRADDEV  | Negative |
| P14625 | CVLLTFGSVRADDEVDVDGT  | Negative |
| P14625 | VDGTVEEDLGKSREGSRTDD  | Negative |
| P14625 | EVDVDGTVEEDLGKSREGSR  | Negative |
| P14625 | FGSVRADDEVDVDGTVEEDL  | Negative |
| P14625 | RALWVLGLCCVLLTFGSVRA  | Negative |
| P14625 | ALWVLGLCCVLLTFGSVRAD  | Negative |
| P14625 | LWVLGLCCVLLTFGSVRADD  | Negative |
| P14625 | VLLTFGSVRADDEVDVDGTV  | Negative |
| P14625 | SVRADDEVDVDGTVEEDLGK  | Negative |
| P14625 | CCVLLTFGSVRADDEVDVDG  | Negative |
| P14625 | ADDEVDVDGTVEEDLGKSRE  | Negative |
| P14625 | LTFGSVRADDEVDVDGTVEE  | Negative |
| P14625 | MRALWVLGLCCVLLTFGSVR  | Negative |
| P14625 | DGTVEEDLGKSREGSRTDDE  | Negative |
| P14625 | RADDEVDVDGTVEEDLGKSR  | Negative |
| P14625 | DEVVDVDGTVEEDLGKSREGS | Negative |
| P14625 | WVLGLCCVLLTFGSVRADDE  | Negative |
| P14625 | VDVDGTVEEDLGKSREGSRT  | Negative |
| P14625 | DDEVVDVDGTVEEDLGKSREG | Negative |
| P14625 | GSVRADDEVDVDGTVEEDLG  | Negative |
| P14625 | LLTFGSVRADDEVDVDGTVE  | Negative |
| P14625 | TVEEDLGKSREGSRTDDEVV  | Negative |
| P14630 | CPEHSQMLTGMDDKETPEP   | Negative |
| P14630 | ALLYLYGLLFNSMNQCPEHS  | Negative |
| P14630 | LYLYGLLFNSMNQCPEHSQ   | Negative |
| P14630 | FNSMNQCPEHSQMLTGMDD   | Negative |
| P14630 | NQCPEHSQMLTGMDDKETP   | Negative |
| P14630 | AALLYLYGLLFNSMNQCPEH  | Negative |
| P14630 | MNQCPEHSQMLTGMDDKET   | Negative |
| P14630 | MFHQVWAALLYLYGLLFNSM  | Negative |
| P14630 | GLLFNSMNQCPEHSQMLTG   | Negative |
| P14630 | QVWAALLYLYGLLFNSMNQC  | Negative |
| P14630 | SMNQCPEHSQMLTGMDDKE   | Negative |
| P14630 | YLYGLLFNSMNQCPEHSQ    | Negative |
| P14630 | LLYLYGLLFNSMNQCPEHSQ  | Negative |
| P14630 | NSMNQCPEHSQMLTGMDDK   | Negative |
| P14630 | LFNSMNQCPEHSQMLTGMMD  | Negative |
| P14630 | LYGLLFNSMNQCPEHSQ     | Negative |

|        |                       |          |
|--------|-----------------------|----------|
| P14630 | LMTLGMDDKETPEPHLGLWY  | Negative |
| P14630 | PEHSQMLTLGMDDKETPEPH  | Negative |
| P14630 | SQLMTLGMDDKETPEPHLGL  | Negative |
| P14630 | VWAALLYLYGLLFNSMNQCP  | Negative |
| P14630 | EHSQMLTLGMDDKETPEPHL  | Negative |
| P14630 | LLFNSMNQCPEHSQMLTLGM  | Negative |
| P14630 | QCPEHSQMLTLGMDDKETPE  | Negative |
| P14630 | QLMTLGMDDKETPEPHLGLW  | Negative |
| P14630 | YGLLFNSMNQCPEHSQMLTL  | Negative |
| P14630 | FHQVWAALLYLYGLLFNSMN  | Negative |
| P14630 | WAALLYLYGLLFNSMNQCPE  | Negative |
| P14630 | HSQMLTLGMDDKETPEPHLG  | Negative |
| P14630 | MTLGMDDKETPEPHLGLWYF  | Negative |
| P14632 | LFIPALLFLGTLGLCLAAPK  | Negative |
| P14632 | CLAAPKKGVRWCVISTAEYS  | Negative |
| P14632 | LAAPKKGVRWCVISTAEYSK  | Negative |
| P14632 | LLFLGTLGLCLAAPKKGVRW  | Negative |
| P14632 | GVRWCVISTAEYSKCRQWQS  | Negative |
| P14632 | VISTAEYSKCRQWQSKIRRT  | Negative |
| P14632 | TLGLCLAAPKKGVRWCVIST  | Negative |
| P14632 | PKKGVRWCVISTAEYSKCRQ  | Negative |
| P14632 | FLGTLGLCLAAPKKGVRWCV  | Negative |
| P14632 | KKGVRWCVISTAEYSKCRQW  | Negative |
| P14632 | LGTGLGLCLAAPKKGVRWCVI | Negative |
| P14632 | LFLGTLGLCLAAPKKGVRWC  | Negative |
| P14632 | ALLFLGTLGLCLAAPKKGVR  | Negative |
| P14632 | KLFIPALLFLGTLGLCLAAP  | Negative |
| P14632 | APKKGVRWCVISTAEYSKCR  | Negative |
| P14632 | CVISTAEYSKCRQWQSKIRR  | Negative |
| P14632 | AAPKKGVRWCVISTAEYSKC  | Negative |
| P14632 | LCLAAPKKGVRWCVISTAEY  | Negative |
| P14632 | WCVISTAEYSKCRQWQSKIR  | Negative |
| P14632 | GLCLAAPKKGVRWCVISTAE  | Negative |
| P14632 | LGLCLAAPKKGVRWCVISTA  | Negative |
| P14632 | PALLFLGTLGLCLAAPKKGV  | Negative |
| P14632 | FIPALLFLGTLGLCLAAPKK  | Negative |
| P14632 | GTLGLCLAAPKKGVRWCVIS  | Negative |
| P14632 | KGVRWCVISTAEYSKCRQWQ  | Negative |
| P14632 | MKLFIPALLFLGTLGLCLAA  | Negative |
| P14632 | ISTAEYSKCRQWQSKIRRTN  | Negative |
| P14632 | VRWCVISTAEYSKCRQWQSK  | Negative |
| P14632 | RWCVISTAEYSKCRQWQSKI  | Negative |
| P14756 | STDLLFVAIMGVSPAFAA    | Negative |
| P14756 | MGVSPAFAADLIDVSKLPS   | Negative |
| P14756 | FAADLIDVSKLPSKAAQGAP  | Negative |
| P14756 | TLDLLFVAIMGVSPAFAAD   | Negative |

|        |                      |          |
|--------|----------------------|----------|
| P14756 | SKLPSKAAQGAPGPVTLQAA | Negative |
| P14756 | DLLFVAIMGVSPAAFAADLI | Negative |
| P14756 | VSKLPSKAAQGAPGPVTLQA | Negative |
| P14756 | IMGVSPAAFAADLIDVSKLP | Negative |
| P14756 | VSPAAFAADLIDVSKLPSKA | Negative |
| P14756 | FVAIMGVSPAAFAADLIDVS | Negative |
| P14756 | PAAFAADLIDVSKLPSKAAQ | Negative |
| P14756 | VAIMGVSPAAFAADLIDVSK | Negative |
| P14756 | AAFAADLIDVSKLPSKAAQG | Negative |
| P14756 | KKVSTLDLLFVAIMGVSPAA | Negative |
| P14756 | AIMGVSPAAFAADLIDVSKL | Negative |
| P14756 | IDVSKLPSKAAQGAPGPVTL | Negative |
| P14756 | AFAADLIDVSKLPSKAAQGA | Negative |
| P14756 | VSTLDLLFVAIMGVSPAAFA | Negative |
| P14756 | DVSKLPSKAAQGAPGPVTLQ | Negative |
| P14756 | DLIDVSKLPSKAAQGAPGPV | Negative |
| P14756 | MKKVSTLDLLFVAIMGVSPA | Negative |
| P14756 | LIDVSKLPSKAAQGAPGPVT | Negative |
| P14756 | GVSPAAFAADLIDVSKLPSK | Negative |
| P14756 | KVSTLDLLFVAIMGVSPAFA | Negative |
| P14756 | SPAAFAADLIDVSKLPSKAA | Negative |
| P14756 | AADLIDVSKLPSKAAQGAPG | Negative |
| P14756 | ADLIDVSKLPSKAAQGAPGP | Negative |
| P14756 | LDLLFVAIMGVSPAAFAADL | Negative |
| P14756 | LFVAIMGVSPAAFAADLIDV | Negative |
| P14780 | CFAAPRQRQSTLVLFPGDLR | Negative |
| P14780 | LVLLVLGCCFAAPRQRQSTL | Negative |
| P14780 | VLLVLGCCFAAPRQRQSTLV | Negative |
| P14780 | TLVLFPGDLRTNLTDRQLAE | Negative |
| P14780 | VLGCCFAAPRQRQSTLVLFP | Negative |
| P14780 | LVLVLLVLGCCFAAPRQRQS | Negative |
| P14780 | LGCCFAAPRQRQSTLVLFPG | Negative |
| P14780 | RQRQSTLVLFPGDLRTNLTD | Negative |
| P14780 | QRQSTLVLFPGDLRTNLTD  | Negative |
| P14780 | PLVLVLLVLGCCFAAPRQRQ | Negative |
| P14780 | AAPRQRQSTLVLFPGDLRTN | Negative |
| P14780 | FAAPRQRQSTLVLFPGDLRT | Negative |
| P14780 | SLWQPLVLVLLVLGCCFAAP | Negative |
| P14780 | LWQPLVLVLLVLGCCFAAPR | Negative |
| P14780 | PRQRQSTLVLFPGDLRTNL  | Negative |
| P14780 | VLFPGLRTNLTDRLAEY    | Negative |
| P14780 | STLVLFPGDLRTNLTDRLA  | Negative |
| P14780 | LFPGDLRTNLTDRLAEYL   | Negative |
| P14780 | LVLFPGLRTNLTDRLAEE   | Negative |
| P14780 | CCFAAPRQRQSTLVLFPGDL | Negative |
| P14780 | RQSTLVLFPGDLRTNLTD   | Negative |

|        |                      |          |
|--------|----------------------|----------|
| P14780 | GCCFAAPRQRQSTLVLFPGD | Negative |
| P14780 | MSLWQPLVLVLLVLGCCFAA | Negative |
| P14780 | LVLGCCFAAPRQRQSTLVLF | Negative |
| P14780 | WQPLVLVLLVLGCCFAAPRQ | Negative |
| P14780 | APRQRQSTLVLFPGDLRTNL | Negative |
| P14780 | LLVLGCCFAAPRQRQSTLV  | Negative |
| P14780 | VLVLLVLGCCFAAPRQRQST | Negative |
| P14780 | QSTLVLFPGDLRTNLTDQR  | Negative |
| P14944 | HARSTQGYGRMDRILAALK  | Negative |
| P14944 | MLAIITVAYLCALPHAHARS | Negative |
| P14944 | YSKTIPAMLAITVAYLCAL  | Negative |
| P14944 | QGYGRMDRILAALKTSPMEP | Negative |
| P14944 | LPHAHARSTQGYGRMDRILA | Negative |
| P14944 | SKTIPAMLAITVAYLCALP  | Negative |
| P14944 | PAMLAITVAYLCALPHAHA  | Negative |
| P14944 | VAYLCALPHAHARSTQGYGR | Negative |
| P14944 | AIITVAYLCALPHAHARSTQ | Negative |
| P14944 | KTIPAMLAITVAYLCALPH  | Negative |
| P14944 | PHAHARSTQGYGRMDRILAA | Negative |
| P14944 | AMLAIITVAYLCALPHAHAR | Negative |
| P14944 | CALPHAHARSTQGYGRMDRI | Negative |
| P14944 | AYLCALPHAHARSTQGYGRM | Negative |
| P14944 | MYSKTIPAMLAITVAYLCA  | Negative |
| P14944 | LCALPHAHARSTQGYGRMDR | Negative |
| P14944 | LAITVAYLCALPHAHARST  | Negative |
| P14944 | HAHARSTQGYGRMDRILAAL | Negative |
| P14944 | TIPAMLAITVAYLCALPHA  | Negative |
| P14944 | AHARSTQGYGRMDRILAALK | Negative |
| P14944 | STQGYGRMDRILAALKTSPM | Negative |
| P14944 | ALPHAHARSTQGYGRMDRIL | Negative |
| P14944 | RSTQGYGRMDRILAALKTSP | Negative |
| P14944 | ITVAYLCALPHAHARSTQGY | Negative |
| P14944 | TQGYGRMDRILAALKTSPME | Negative |
| P14944 | TVAYLCALPHAHARSTQGYG | Negative |
| P14944 | YLCALPHAHARSTQGYGRMD | Negative |
| P14944 | ARSTQGYGRMDRILAALKTS | Negative |
| P14944 | IPAMLAITVAYLCALPHAH  | Negative |
| P14946 | VLLVVALFAVFLGSAHGIK  | Negative |
| P14946 | LGSAHGIKVPPGPNITAEY  | Negative |
| P14946 | VVALFAVFLGSAHGIKVPP  | Negative |
| P14946 | GIAKVPPGPNITAEYGDKW  | Negative |
| P14946 | KVPPGPNITAEYGDKWLDK  | Negative |
| P14946 | LLVVALFAVFLGSAHGIKV  | Negative |
| P14946 | VFLGSAHGIKVPPGPNITA  | Negative |
| P14946 | MASSSSVLLVVALFAVFLGS | Negative |
| P14946 | GSAHGIKVPPGPNITAEYG  | Negative |



|        |                      |          |
|--------|----------------------|----------|
| P14946 | SSSSVLLVVALFAVFLGSAH | Negative |
| P14946 | SSVLLVVALFAVFLGSAHGI | Negative |
| P14946 | SVLLVVALFAVFLGSAHGIA | Negative |
| P14946 | IAKVPPGPNITAEYGDKWLD | Negative |
| P14946 | ASSSSVLLVVALFAVFLGSA | Negative |
| P14946 | SAHGIAKVPPGPNITAEYGD | Negative |
| P14946 | GPNITAEYGDKWLDKSTWY  | Negative |
| P14946 | AHGIAKVPPGPNITAEYGDK | Negative |
| P14946 | VALFAVFLGSAHGIAKVPPG | Negative |
| P14946 | HGIAKVPPGPNITAEYGDKW | Negative |
| P14946 | AVFLGSAHGIAKVPPGPNIT | Negative |
| P14946 | FAVFLGSAHGIAKVPPGPNI | Negative |
| P14946 | VPPGPNITAEYGDKWLDKS  | Negative |
| P14946 | PGPNITAEYGDKWLDKSTW  | Negative |
| P14946 | FLGSAHGIAKVPPGPNITAE | Negative |
| P14946 | LFVFLGSAHGIAKVPPGPN  | Negative |
| P14946 | ALFAVFLGSAHGIAKVPPGP | Negative |
| P14946 | SSSVLLVVALFAVFLGSAHG | Negative |
| P14946 | PPGPNITAEYGDKWLDKST  | Negative |
| P14946 | AKVPPGPNITAEYGDKWLD  | Negative |
| P15018 | WKGAGSPLPITPVNATCAI  | Negative |
| P15018 | GAGSPLPITPVNATCAIRHP | Negative |
| P15018 | SPLPITPVNATCAIRHPCHN | Negative |
| P15018 | GVVPLLLVLHWKHGAGSPLP | Negative |
| P15018 | LLVLHWKHGAGSPLPITPVN | Negative |
| P15018 | LLLVLHWKHGAGSPLPITPV | Negative |
| P15018 | PLPITPVNATCAIRHPCHNN | Negative |
| P15018 | VNATCAIRHPCHNNLMNQIR | Negative |
| P15018 | LAAGVVPLLLVLHWKHGAGS | Negative |
| P15018 | LHWKHGAGSPLPITPVNATC | Negative |
| P15018 | PITPVNATCAIRHPCHNNLM | Negative |
| P15018 | KVLAAGVVPLLLVLHWKHGA | Negative |
| P15018 | ITPVNATCAIRHPCHNNLMN | Negative |
| P15018 | KHGAGSPLPITPVNATCAIR | Negative |
| P15018 | AGVVPLLLVLHWKHGAGSPL | Negative |
| P15018 | LVLHWKHGAGSPLPITPVNA | Negative |
| P15018 | VPLLLVLHWKHGAGSPLPIT | Negative |
| P15018 | PVNATCAIRHPCHNNLMNQI | Negative |
| P15018 | AGSPLPITPVNATCAIRHPC | Negative |
| P15018 | PLLLVLHWKHGAGSPLPITP | Negative |
| P15018 | AAGVVPLLLVLHWKHGAGSP | Negative |
| P15018 | HGAGSPLPITPVNATCAIRH | Negative |
| P15018 | HWKHGAGSPLPITPVNATCA | Negative |
| P15018 | MKVLAAGVVPLLLVLHWKHG | Negative |
| P15018 | VLAAGVVPLLLVLHWKHGAG | Negative |
| P15018 | LPITPVNATCAIRHPCHNNL | Negative |

|        |                       |          |
|--------|-----------------------|----------|
| P15018 | VLHWKHGAGSPLPITPVNAT  | Negative |
| P15018 | GSPLPITPVNATCAIRHPCH  | Negative |
| P15018 | TPVNATCAIRHPCHNNLMNQ  | Negative |
| P15085 | SVADEAQVQKVKELEDLEHL  | Negative |
| P15085 | MRGLLVLSVLLGAVFGKEDF  | Negative |
| P15085 | LGAVFGKEDFVGHQVLRISV  | Negative |
| P15085 | GAVFGKEDFVGHQVLRISVA  | Negative |
| P15085 | VADEAQVQKVKELEDLEHLQ  | Negative |
| P15085 | LSVLLGAVFGKEDFVGHQVL  | Negative |
| P15085 | LRISVADEAQVQKVKELEDL  | Negative |
| P15085 | VFGKEDFVGHQVLRISVADE  | Negative |
| P15085 | HQVLRISVADEAQVQKVKELE | Negative |
| P15085 | LLVLSVLLGAVFGKEDFVGH  | Negative |
| P15085 | GLLVLSVLLGAVFGKEDFVG  | Negative |
| P15085 | QVLRISVADEAQVQKVKELE  | Negative |
| P15085 | AVFGKEDFVGHQVLRISVAD  | Negative |
| P15085 | FVGHQVLRISVADEAQVQKV  | Negative |
| P15085 | FGKEDFVGHQVLRISVADEA  | Negative |
| P15085 | VLRISVADEAQVQKVKELED  | Negative |
| P15085 | KEDFVGHQVLRISVADEAQV  | Negative |
| P15085 | RISVADEAQVQKVKELEDLE  | Negative |
| P15085 | GKEDFVGHQVLRISVADEAQ  | Negative |
| P15085 | VLSVLLGAVFGKEDFVGHQV  | Negative |
| P15085 | LLGAVFGKEDFVGHQVLRIS  | Negative |
| P15085 | EDFVGHQVLRISVADEAQVQ  | Negative |
| P15085 | LVLSVLLGAVFGKEDFVGHQ  | Negative |
| P15085 | VGHQVLRISVADEAQVQKVK  | Negative |
| P15085 | VLLGAVFGKEDFVGHQVLR   | Negative |
| P15085 | DFVGHQVLRISVADEAQVQK  | Negative |
| P15085 | SVLLGAVFGKEDFVGHQVLR  | Negative |
| P15085 | GHQVLRISVADEAQVQKVKE  | Negative |
| P15085 | ISVADEAQVQKVKELEDLEH  | Negative |
| P15147 | VVLPIMGVLGKKNGYAVDSS  | Negative |
| P15147 | GYAVDSSGKAPECLLSNYCY  | Negative |
| P15147 | LPIMGVLGKKNGYAVDSSGK  | Negative |
| P15147 | IMGVLGKKNGYAVDSSGKAP  | Negative |
| P15147 | MGVLGKKNGYAVDSSGKAPE  | Negative |
| P15147 | KNGYAVDSSGKAPECLLSNY  | Negative |
| P15147 | LGKKNGYAVDSSGKAPECLL  | Negative |
| P15147 | VLPIMGVLGKKNGYAVDSSG  | Negative |
| P15147 | SSGKAPECLLSNYCYNECTK  | Negative |
| P15147 | GKAPECLLSNYCYNECTKVH  | Negative |
| P15147 | NGYAVDSSGKAPECLLSNYC  | Negative |
| P15147 | LLFLVVLPIMGVLGKKNGYA  | Negative |
| P15147 | KAPECLLSNYCYNECTKVHY  | Negative |
| P15147 | LVVLPIMGVLGKKNGYAVDS  | Negative |

|        |                      |          |
|--------|----------------------|----------|
| P15147 | KFLLFLVLPIMGVLGKKN   | Negative |
| P15147 | SGKAPECLLSNYCYNECTKV | Negative |
| P15147 | GKKNGYAVDSSGKAPECLLS | Negative |
| P15147 | LFLVLPIMGVLGKKNGYAV  | Negative |
| P15147 | PIMGVLGKKNGYAVDSSGKA | Negative |
| P15147 | AVDSSGKAPECLLSNYCYNE | Negative |
| P15147 | YAVDSSGKAPECLLSNYCYN | Negative |
| P15147 | MKFLLLFLVLPIMGVLGKK  | Negative |
| P15147 | FLVLPIMGVLGKKNGYAVD  | Negative |
| P15147 | DSSGKAPECLLSNYCYNECT | Negative |
| P15147 | VDSSGKAPECLLSNYCYNEC | Negative |
| P15147 | GVLGKKNGYAVDSSGKAPEC | Negative |
| P15147 | FLLFLVLPIMGVLGKKNNG  | Negative |
| P15147 | KKNGYAVDSSGKAPECLLSN | Negative |
| P15147 | VLGKKNGYAVDSSGKAPECL | Negative |
| P15156 | SEAWCIVLFSVFASFSAEPT | Negative |
| P15156 | AEPTMHGEILSPNYPQAYPN | Negative |
| P15156 | VFASFSAEPTMHGEILSPNY | Negative |
| P15156 | FSVFASFSAEPTMHGEILSP | Negative |
| P15156 | IVLFSVFASFSAEPTMHGEI | Negative |
| P15156 | FASFSAEPTMHGEILSPNYP | Negative |
| P15156 | VLFSVFASFSAEPTMHGEIL | Negative |
| P15156 | WCIVLFSVFASFSAEPTMHG | Negative |
| P15156 | GEILSPNYPQAYPNEMEKTW | Negative |
| P15156 | ASFSAEPTMHGEILSPNYPQ | Negative |
| P15156 | HGEILSPNYPQAYPNEMEKT | Negative |
| P15156 | FSAEPTMHGEILSPNYPQAY | Negative |
| P15156 | GKSSEAWCIVLFSVFASFSA | Negative |
| P15156 | SFSAEPTMHGEILSPNYPQA | Negative |
| P15156 | MHGEILSPNYPQAYPNEMEK | Negative |
| P15156 | ILSPNYPQAYPNEMEKTWDI | Negative |
| P15156 | SSEAWCIVLFSVFASFSAEP | Negative |
| P15156 | MGKSSEAWCIVLFSVFASF  | Negative |
| P15156 | EILSPNYPQAYPNEMEKTWD | Negative |
| P15156 | EAWCIVLFSVFASFSAEPTM | Negative |
| P15156 | CIVLFSVFASFSAEPTMHGE | Negative |
| P15156 | SVFASFSAEPTMHGEILSPN | Negative |
| P15156 | EPTMHGEILSPNYPQAYPNE | Negative |
| P15156 | TMHGEILSPNYPQAYPNEME | Negative |
| P15156 | PTMHGEILSPNYPQAYPNEM | Negative |
| P15156 | SAEPTMHGEILSPNYPQAYP | Negative |
| P15156 | LSPNYPQAYPNEMEKTWDIE | Negative |
| P15156 | LFSVFASFSAEPTMHGEILS | Negative |
| P15156 | KSSEAWCIVLFSVFASFSAE | Negative |
| P15169 | RYDDLVRTLYKVQNECPGIT | Negative |
| P15169 | HHRYDDLVRTLYKVQNECPG | Negative |

|        |                        |          |
|--------|------------------------|----------|
| P15169 | VTFRHHRYDDLVRTLYKVN    | Negative |
| P15169 | FLHLLLFLKLVAPVTFRHHR   | Negative |
| P15169 | LSVFLHLLLFLKLVAPVTFR   | Negative |
| P15169 | APVTFRHHRYDDLVRTLYKV   | Negative |
| P15169 | FRHHRYDDLVRTLYKVNQEC   | Negative |
| P15169 | LVAPVTFRHHRYDDLVRTLY   | Negative |
| P15169 | KL VAPVTFRHHRYDDLVRTL  | Negative |
| P15169 | VAPVTFRHHRYDDLVRTLYK   | Negative |
| P15169 | PVTFRHHRYDDLVRTLYKVQ   | Negative |
| P15169 | LFLKLVAPVTFRHHRYDDLVR  | Negative |
| P15169 | LHLLLFLKLVAPVTFRHHRY   | Negative |
| P15169 | TFRHHRYDDLVRTLYKVQNE   | Negative |
| P15169 | SDLLSVFLHLLLFLKLVAPV   | Negative |
| P15169 | MSDLLSVFLHLLLFLKLVAP   | Negative |
| P15169 | LLLFLKLVAPVTFRHHRYDD   | Negative |
| P15169 | DLLSVFLHLLLFLKLVAPVT   | Negative |
| P15169 | YDDLVRTLYKVQNECPGTR    | Negative |
| P15169 | DLVRTLYKVQNECPGTRVY    | Negative |
| P15169 | HLLLFLKLVAPVTFRHHRYD   | Negative |
| P15169 | RHHRYDDLVRTLYKVQNECP   | Negative |
| P15169 | LLFLKLVAPVTFRHHRYDDL   | Negative |
| P15169 | DDLVRTLYKVQNECPGITRV   | Negative |
| P15169 | HRYDDLVRTLYKVQNECPGI   | Negative |
| P15169 | LLSVFLHLLLFLKLVAPVTF   | Negative |
| P15169 | VFLHLLLFLKLVAPVTFRHH   | Negative |
| P15169 | FKLVAPVTFRHHRYDDLVRT   | Negative |
| P15169 | LLFLKLVAPVTFRHHRYDDL   | Negative |
| P15196 | ATPPLVPLLLLLLLLLLPHAH  | Negative |
| P15196 | LLLPHAHHRLALRSVLATQ    | Negative |
| P15196 | RLALRSVLATQRAQDSPAVH   | Negative |
| P15196 | VPLLLLLLLLLLPHAHHRLAL  | Negative |
| P15196 | ALRSVLATQRAQDSPAVHLI   | Negative |
| P15196 | LLLLLLLLLPHAHHRLALRSV  | Negative |
| P15196 | MATPPLVPLLLLLLLLLLPHA  | Negative |
| P15196 | LLLLLLLLLPHAHHRLALRSVL | Negative |
| P15196 | VLATQRAQDSPAVHLINGLG   | Negative |
| P15196 | LLPHAHHRLALRSVLATQRA   | Negative |
| P15196 | LLLLLLPHAHHRLALRSVLA   | Negative |
| P15196 | HAHHRLALRSVLATQRAQDS   | Negative |
| P15196 | LATQRAQDSPAVHLINGLGQ   | Negative |
| P15196 | LLLLLPHAHHRLALRSVLAT   | Negative |
| P15196 | PPLVPLLLLLLLLLLPHAHHR  | Negative |
| P15196 | PLVPLLLLLLLLLLPHAHHRL  | Negative |
| P15196 | RSVLATQRAQDSPAVHLING   | Negative |
| P15196 | LRSVLATQRAQDSPAVHLIN   | Negative |
| P15196 | AHHRLALRSVLATQRAQDSP   | Negative |

|        |                       |          |
|--------|-----------------------|----------|
| P15196 | TPPLVPLLLLLLLLLLPHAAH | Negative |
| P15196 | LLLPHAAHRLALRSVLATQR  | Negative |
| P15196 | LALRSVLATQRAQDSPAVHL  | Negative |
| P15196 | HHRLALRSVLATQRAQDSPA  | Negative |
| P15196 | SVLATQRAQDSPAVHLINGL  | Negative |
| P15196 | LVPLLLLLLLLLLPHAAHRLA | Negative |
| P15196 | PHAAHRLALRSVLATQRAQD  | Negative |
| P15196 | HRLALRSVLATQRAQDPAV   | Negative |
| P15196 | PLLLLLLLLLLPHAAHRLALR | Negative |
| P15196 | LLLLLLLLLPHAAHRLALRS  | Negative |
| P15223 | FVLIGTVWAKDGYLVDAKGC  | Negative |
| P15223 | CFVLIGTVWAKDGYLVDAKG  | Negative |
| P15223 | GTVWAKDGYLVDAKGCKKNC  | Negative |
| P15223 | ITACFVLIGTVWAKDGYLVD  | Negative |
| P15223 | LIGTVWAKDGYLVDAKGCKK  | Negative |
| P15223 | MNSLLMITACFVLIGTVWAK  | Negative |
| P15223 | VLIGTVWAKDGYLVDAKGCK  | Negative |
| P15223 | CKKNCYKLGKNDYCNRECRM  | Negative |
| P15223 | LVDAKGCKKNCYKLGKNDYC  | Negative |
| P15223 | GYLVDAKGCKKNCYKLGKND  | Negative |
| P15223 | VDAKGCKKNCYKLGKNDYCN  | Negative |
| P15223 | DGYLVDAKGCKKNCYKLGKN  | Negative |
| P15223 | AKDGYLVDAKGCKKNCYKLG  | Negative |
| P15223 | GCKKNCYKLGKNDYCNRECR  | Negative |
| P15223 | TVWAKDGYLVDAKGCKKNCY  | Negative |
| P15223 | KGCKKNCYKLGKNDYCNREC  | Negative |
| P15223 | AKGCKKNCYKLGKNDYCNRE  | Negative |
| P15223 | KDGYLVDAKGCKKNCYKLGK  | Negative |
| P15223 | VWAKDGYLVDAKGCKKNCYK  | Negative |
| P15223 | LLMITACFVLIGTVWAKDGY  | Negative |
| P15223 | ACFVLIGTVWAKDGYLVDAK  | Negative |
| P15223 | NSLLMITACFVLIGTVWAKD  | Negative |
| P15223 | SLLMITACFVLIGTVWAKDG  | Negative |
| P15223 | DAKGCKKNCYKLGKNDYCNR  | Negative |
| P15223 | YLVDAKGCKKNCYKLGKNDY  | Negative |
| P15223 | MITACFVLIGTVWAKDGYLV  | Negative |
| P15223 | IGTVWAKDGYLVDAKGCKKN  | Negative |
| P15223 | WAKDGYLVDAKGCKKNCYKL  | Negative |
| P15223 | TACFVLIGTVWAKDGYLVDA  | Negative |
| P15228 | ISASMLIDGLVNADGYIRGS  | Negative |
| P15228 | GLVNADGYIRGSNGCKVSCL  | Negative |
| P15228 | LIDGLVNADGYIRGSNGCKV  | Negative |
| P15228 | RGSNGCKVSCLLGNEGCKNE  | Negative |
| P15228 | GCKVSCLLGNEGCKNECRAV  | Negative |
| P15228 | IDGLVNADGYIRGSNGCKVS  | Negative |
| P15228 | YIRGSNGCKVSCLLGNEGCKN | Negative |

|        |                       |          |
|--------|-----------------------|----------|
| P15228 | GSNGCKVSCLLGNEGCNKEC  | Negative |
| P15228 | IRGSNGCKVSCLLGNEGCNK  | Negative |
| P15228 | ASMLIDGLVNADGYIRGSNG  | Negative |
| P15228 | VISASMLIDGLVNADGYIRG  | Negative |
| P15228 | ADGYIRGSNGCKVSCLLGNE  | Negative |
| P15228 | FLLLVISASMLIDGLVNADG  | Negative |
| P15228 | VNADGYIRGSNGCKVSCLLG  | Negative |
| P15228 | NADGYIRGSNGCKVSCLLGN  | Negative |
| P15228 | LLVISASMLIDGLVNADGYI  | Negative |
| P15228 | LVNADGYIRGSNGCKVSCLL  | Negative |
| P15228 | LFLLLVISASMLIDGLVNAD  | Negative |
| P15228 | GYIRGSNGCKVSCLLGNEGC  | Negative |
| P15228 | MLIDGLVNADGYIRGSNGCK  | Negative |
| P15228 | SNGCKVSCLLGNEGCNKECR  | Negative |
| P15228 | SASMLIDGLVNADGYIRGSN  | Negative |
| P15228 | NGCKVSCLLGNEGCNKECRA  | Negative |
| P15228 | SMLIDGLVNADGYIRGSNGC  | Negative |
| P15228 | MKLFLLLVISASMLIDGLVN  | Negative |
| P15228 | LLLVISASMLIDGLVNADGY  | Negative |
| P15228 | DGYIRGSNGCKVSCLLGNEG  | Negative |
| P15228 | KLFLLLVISASMLIDGLVNA  | Negative |
| P15228 | DGLVNADGYIRGSNGCKVSC  | Negative |
| P15242 | LEV DSTAPTDP SLDVEWNE | Negative |
| P15242 | TPDPSLDVEWNEWRTKHGKT  | Negative |
| P15242 | EVDSTAPTDP SLDVEWNEW  | Negative |
| P15242 | AILCLEVDSTAPTDP SLDV  | Negative |
| P15242 | VDSTAPTDP SLDVEWNEW R | Negative |
| P15242 | SLDVEWNEWRTKHGKTYNMN  | Negative |
| P15242 | EWNEWRTKHGKTYNMNEERL  | Negative |
| P15242 | DSTAPTDP SLDVEWNEW RT | Negative |
| P15242 | CLEVDSTAPTDP SLDVEWN  | Negative |
| P15242 | FLAILCLEVDSTAPTDP SL  | Negative |
| P15242 | TAPTDP SLDVEWNEWRTKH  | Negative |
| P15242 | WNEWRTKHGKTYNMNEERLK  | Negative |
| P15242 | LDVEWNEWRTKHGKTYNMNE  | Negative |
| P15242 | NEWRTKHGKTYNMNEERLKR  | Negative |
| P15242 | MIAVLFLAILCLEVDSTAPT  | Negative |
| P15242 | LAILCLEVDSTAPTDP SLD  | Negative |
| P15242 | PSLDVEWNEWRTKHGKTYNM  | Negative |
| P15242 | DVEWNEWRTKHGKTYNMNEE  | Negative |
| P15242 | LFLAILCLEVDSTAPTDP S  | Negative |
| P15242 | STAPTDP SLDVEWNEWRTK  | Negative |
| P15242 | APTDP SLDVEWNEWRTKHG  | Negative |
| P15242 | ILCLEVDSTAPTDP SLDVE  | Negative |
| P15242 | PDPSLDVEWNEWRTKHGKTY  | Negative |
| P15242 | LCLEVDSTAPTDP SLDVEW  | Negative |

|        |                       |          |
|--------|-----------------------|----------|
| P15242 | IAVLFLAILCLEVDSTAPTP  | Negative |
| P15242 | VEVNEWRTKHKGTYNMNEER  | Negative |
| P15242 | VLFLAILCLEVDSTAPTPDP  | Negative |
| P15242 | PTPDPSLDVEVNEWRTKHKGK | Negative |
| P15242 | DPSLDVEVNEWRTKHKGTYN  | Negative |
| P15247 | GIRDTNYLIENLKDDPPSKC  | Negative |
| P15247 | STTWGIRDTNYLIENLKDDP  | Negative |
| P15247 | LASVLLFSSVLGQRCSTTWG  | Negative |
| P15247 | LGQRCSTTWGIRDTNYLIEN  | Negative |
| P15247 | GQRCSTTWGIRDTNYLIENL  | Negative |
| P15247 | TTWGIRDTNYLIENLKDDPP  | Negative |
| P15247 | VLLFSSVLGQRCSTTWGIRD  | Negative |
| P15247 | IRDTNYLIENLKDDPPSKCS  | Negative |
| P15247 | LLFSSVLGQRCSTTWGIRDT  | Negative |
| P15247 | SSVLGQRCSTTWGIRDTNYL  | Negative |
| P15247 | ILASVLLFSSVLGQRCSTTW  | Negative |
| P15247 | RDTNYLIENLKDDPPSKCSC  | Negative |
| P15247 | TNYLIENLKDDPPSKCSCSG  | Negative |
| P15247 | VTYILASVLLFSSVLGQRCS  | Negative |
| P15247 | FSSVLGQRCSTTWGIRDTNY  | Negative |
| P15247 | SVLLFSSVLGQRCSTTWGIR  | Negative |
| P15247 | LVTYILASVLLFSSVLGQRC  | Negative |
| P15247 | ASVLLFSSVLGQRCSTTWGI  | Negative |
| P15247 | LFSSVLGQRCSTTWGIRDTN  | Negative |
| P15247 | RCSTTWGIRDTNYLIENLKD  | Negative |
| P15247 | CSTTWGIRDTNYLIENLKDD  | Negative |
| P15247 | SVLGQRCSTTWGIRDTNYLI  | Negative |
| P15247 | TWGIRDTNYLIENLKDDPPS  | Negative |
| P15247 | YILASVLLFSSVLGQRCSTT  | Negative |
| P15247 | DTNYLIENLKDDPPSKCSCS  | Negative |
| P15247 | VLGQRCSTTWGIRDTNYLIE  | Negative |
| P15247 | WGIRDTNYLIENLKDDPPSK  | Negative |
| P15247 | QRCSTTWGIRDTNYLIENLK  | Negative |
| P15247 | MLVTYILASVLLFSSVLGQR  | Negative |
| P15253 | KEQFLDGDGWTERWIESKHK  | Negative |
| P15253 | PVVYFKEQFLDGDGWTERWI  | Negative |
| P15253 | FKEQFLDGDGWTERWIESKH  | Negative |
| P15253 | VVYFKEQFLDGDGWTERWIE  | Negative |
| P15253 | QFLDGDGWTERWIESKHKSD  | Negative |
| P15253 | AAEPVVYFKEQFLDGDGWTE  | Negative |
| P15253 | GLLGLAAEPVVYFKEQFLD   | Negative |
| P15253 | VYFKEQFLDGDGWTERWIES  | Negative |
| P15253 | EQFLDGDGWTERWIESKHKS  | Negative |
| P15253 | MLLPVLLLGLLGLAAEPV    | Negative |
| P15253 | LDGDGWTERWIESKHKSDFG  | Negative |
| P15253 | DGDGWTERWIESKHKSDFGK  | Negative |

|        |                       |          |
|--------|-----------------------|----------|
| P15253 | AAAEPVVYFKEQFLDGDGWT  | Negative |
| P15253 | FLDGDGWTERWIESKHKSDF  | Negative |
| P15253 | LLGLLGLAAAEPVVYFKEQF  | Negative |
| P15253 | PVPLLGLLGLAAAEPVVYF   | Negative |
| P15253 | LGLLGLAAAEPVVYFKEQFL  | Negative |
| P15253 | LAAAEPVVYFKEQFLDGDGW  | Negative |
| P15253 | LLGLAAAEPVVYFKEQFLDG  | Negative |
| P15253 | PLLGLLGLAAAEPVVYFKE   | Negative |
| P15253 | YFKEQFLDGDGWTERWIESK  | Negative |
| P15253 | GDGWTERWIESKHKSDFGKF  | Negative |
| P15253 | LLLGLLGLAAAEPVVYFKEQ  | Negative |
| P15253 | AEPVVYFKEQFLDGDGWTER  | Negative |
| P15253 | EPVVYFKEQFLDGDGWTERW  | Negative |
| P15253 | LGLAAAEPVVYFKEQFLDGD  | Negative |
| P15253 | VPLLGLLGLAAAEPVVYFK   | Negative |
| P15253 | LLPVPLLGLLGLAAAEPVV   | Negative |
| P15253 | GLAAAEPVVYFKEQFLDGDG  | Negative |
| P15270 | GALCMGGKVYGEVNGDWNNN  | Negative |
| P15270 | NNGDWNNNGDWNNNGDWNNN  | Negative |
| P15270 | YGEVNGDWNNNGDWNNNGDW  | Negative |
| P15270 | GKVYGEVNGDWNNNGDWNNN  | Negative |
| P15270 | EVNGDWNNNGDWNNNGDWNN  | Negative |
| P15270 | KVYGEVNGDWNNNGDWNNNG  | Negative |
| P15270 | NGDWNNNGDWNNNGDWNNNG  | Negative |
| P15270 | LVVGALCMGGKVYGEVNGDW  | Negative |
| P15270 | GDWNNNGDWNNNGDWNNNGP  | Negative |
| P15270 | LLVVGALCMGGKVYGEVNGD  | Negative |
| P15270 | LSLLVVGALCMGGKVYGEVN  | Negative |
| P15270 | SLLVVGALCMGGKVYGEVNG  | Negative |
| P15270 | ALCMGGKVYGEVNGDWNNNG  | Negative |
| P15270 | WNNNGDWNNNGDWNNNGDWNN | Negative |
| P15270 | KILSLLVVGALCMGGKVYGE  | Negative |
| P15270 | DWNNNGDWNNNGDWNNNGDW  | Negative |
| P15270 | NNNGDWNNNGDWNNNGDWNN  | Negative |
| P15270 | ILSLLVVGALCMGGKVYGEV  | Negative |
| P15270 | MKILSLLVVGALCMGGKVYG  | Negative |
| P15270 | CMGGKVYGEVNGDWNNNGDW  | Negative |
| P15270 | LCMGGKVYGEVNGDWNNNGD  | Negative |
| P15270 | VNGDWNNNGDWNNNGDWNNN  | Negative |
| P15270 | NGDWNNNGDWNNNGDWNNNG  | Negative |
| P15270 | GDWNNNGDWNNNGDWNNNGD  | Negative |
| P15270 | VVGALCMGGKVYGEVNGDWNN | Negative |
| P15270 | VYGEVNGDWNNNGDWNNNGD  | Negative |
| P15270 | MGGKVYGEVNGDWNNNGDWNN | Negative |
| P15270 | GEVNGDWNNNGDWNNNGDWNN | Negative |
| P15270 | GGKVYGEVNGDWNNNGDWNN  | Negative |



|        |                       |          |
|--------|-----------------------|----------|
| P15279 | TSVSALAMLALAPAALSSVA  | Negative |
| P15279 | VSALAMLALAPAALSSVAYA  | Negative |
| P15279 | ALSSVAYANDKLEVELSKSDD | Negative |
| P15279 | LALAPAALSSVAYANDKLVE  | Negative |
| P15279 | LAPAALSSVAYANDKLEVELS | Negative |
| P15279 | MSRFVTSVSALAMLALAPAA  | Negative |
| P15279 | SVSALAMLALAPAALSSVAY  | Negative |
| P15279 | YANDKLEVELSKSDDNWVMPG | Negative |
| P15279 | SSVAYANDKLEVELSKSDDNW | Negative |
| P15279 | VAYANDKLEVELSKSDDNWVM | Negative |
| P15279 | AYANDKLEVELSKSDDNWVMP | Negative |
| P15279 | AALSSVAYANDKLEVELSKSD | Negative |
| P15279 | NDKLEVELSKSDDNWVMPGKN | Negative |
| P15279 | VTSVSALAMLALAPAALSSV  | Negative |
| P15279 | DKLEVELSKSDDNWVMPGKNY | Negative |
| P15279 | SRFVTSVSALAMLALAPAAL  | Negative |
| P15279 | LAMLALAPAALSSVAYANDK  | Negative |
| P15279 | ANDKLEVELSKSDDNWVMPGK | Negative |
| P15279 | ALAMLALAPAALSSVAYAND  | Negative |
| P15279 | FVTSVSALAMLALAPAALSS  | Negative |
| P15279 | KLVELSKSDDNWVMPGKNYD  | Negative |
| P15279 | APAALSSVAYANDKLEVELSK | Negative |
| P15279 | RFVTSVSALAMLALAPAALS  | Negative |
| P15279 | LSSVAYANDKLEVELSKSDDN | Negative |
| P15279 | SALAMLALAPAALSSVAYAN  | Negative |
| P15279 | PAALSSVAYANDKLEVELSKS | Negative |
| P15279 | AMLALAPAALSSVAYANDKL  | Negative |
| P15279 | ALAPAALSSVAYANDKLVEL  | Negative |
| P15279 | SVAYANDKLEVELSKSDDNWV | Negative |
| P15289 | LLLALAAGLAVARPPNIVLI  | Negative |
| P15289 | RPPNIVLIFADDLGYGDLGC  | Negative |
| P15289 | AAGLAVARPPNIVLIFADDL  | Negative |
| P15289 | LAVARPPNIVLIFADDLGYG  | Negative |
| P15289 | SLLLALAAGLAVARPPNIVL  | Negative |
| P15289 | GAPRSLLLALAAGLAVARPP  | Negative |
| P15289 | MGAPRSLLLALAAGLAVARP  | Negative |
| P15289 | APRSLLLALAAGLAVARPPN  | Negative |
| P15289 | NIVLIFADDLGYGDLGCYGH  | Negative |
| P15289 | ARPPNIVLIFADDLGYGDLG  | Negative |
| P15289 | IFADDLGYGDLGCYGHPSST  | Negative |
| P15289 | RSLLLALAAGLAVARPPNIV  | Negative |
| P15289 | FADDLGYGDLGCYGHPSSTT  | Negative |
| P15289 | LALAAGLAVARPPNIVLIFA  | Negative |
| P15289 | VLIFADDLGYGDLGCYGHPS  | Negative |
| P15289 | ADDLGYGDLGCYGHPSSTTP  | Negative |
| P15289 | IVLIFADDLGYGDLGCYGHP  | Negative |

|        |                      |          |
|--------|----------------------|----------|
| P15289 | PPNIVLIFADDLGYGDLGCV | Negative |
| P15289 | ALAAGLAVARPPNIVLIFAD | Negative |
| P15289 | VARPPNIVLIFADDLGYGDL | Negative |
| P15289 | GLAVARPPNIVLIFADDLGY | Negative |
| P15289 | DLGYGDLGCVGHPSSSTPNL | Negative |
| P15289 | LIFADDLGYGDLGCVGHPSS | Negative |
| P15289 | AGLAVARPPNIVLIFADDLG | Negative |
| P15289 | DDLGYGDLGCVGHPSSSTPN | Negative |
| P15289 | LLALAAGLAVARPPNIVLIF | Negative |
| P15289 | AVARPPNIVLIFADDLGYGD | Negative |
| P15289 | PNIVLIFADDLGYGDLGCVG | Negative |
| P15289 | LAAGLAVARPPNIVLIFADD | Negative |
| P15320 | SAAGKLAAALAIILAASAGA | Negative |
| P15320 | ASAGYAAEIVAANGANGPG  | Negative |
| P15320 | NNFRLSAAGKLAAALAIILA | Negative |
| P15320 | GKLAAALAIILAASAGAYAA | Negative |
| P15320 | AYAAEIVAANGANGPGVSTA | Negative |
| P15320 | RLSAAGKLAAALAIILAASA | Negative |
| P15320 | LSAAGKLAAALAIILAASAG | Negative |
| P15320 | IILAASAGYAAEIVAANGA  | Negative |
| P15320 | SAGYAAEIVAANGANGPGV  | Negative |
| P15320 | ILAASAGYAAEIVAANGAN  | Negative |
| P15320 | YAAEIVAANGANGPGVSTAA | Negative |
| P15320 | NNNFRLSAAGKLAAALAIIL | Negative |
| P15320 | LAIIILAASAGYAAEIVAAN | Negative |
| P15320 | NFRLSAAGKLAAALAIILAA | Negative |
| P15320 | AGYAAEIVAANGANGPGVS  | Negative |
| P15320 | MKNNNFRLSAAGKLAAALAI | Negative |
| P15320 | AIILAASAGYAAEIVAANG  | Negative |
| P15320 | KNNNFRLSAAGKLAAALAI  | Negative |
| P15320 | AAEIVAANGANGPGVSTAAT | Negative |
| P15320 | AAALAIILAASAGYAAEIV  | Negative |
| P15320 | AASAGYAAEIVAANGANGP  | Negative |
| P15320 | FRLSAAGKLAAALAIILAAS | Negative |
| P15320 | LAASAGYAAEIVAANGANG  | Negative |
| P15320 | GAYAAEIVAANGANGPGVST | Negative |
| P15320 | AGKLAAALAIILAASAGAYA | Negative |
| P15320 | AAGKLAAALAIILAASAGAY | Negative |
| P15320 | KLAAALAIILAASAGAYAAE | Negative |
| P15320 | ALAIILAASAGYAAEIVAA  | Negative |
| P15320 | LAAALAIILAASAGYAAEI  | Negative |
| P15321 | MSMGESRRALQDSTREVNQL | Negative |
| P15321 | LSAETLPDSHMMQDMSMGES | Negative |
| P15321 | ALTLLVSTALSAETLPDSHM | Negative |
| P15321 | LPDSHMMQDMSMGESRRALQ | Negative |
| P15321 | PDSHMMQDMSMGESRRALQD | Negative |

|        |                       |          |
|--------|-----------------------|----------|
| P15321 | MQDMSMGESRRALQDSTREV  | Negative |
| P15321 | STALSAETLPDSHMMQDMSM  | Negative |
| P15321 | AETLPDSHMMQDMSMGESRR  | Negative |
| P15321 | KKITALTLLVSTALSAETLP  | Negative |
| P15321 | LLVSTALSAETLPDSHMMQD  | Negative |
| P15321 | DMSMGESRRALQDSTREVNQ  | Negative |
| P15321 | DSHMMQDMSMGESRRALQDS  | Negative |
| P15321 | TLPDSHMMQDMSMGESRRAL  | Negative |
| P15321 | HMMQDMSMGESRRALQDSTR  | Negative |
| P15321 | TLLVSTALSAETLPDSHMMQ  | Negative |
| P15321 | ALSAETLPDSHMMQDMSMGE  | Negative |
| P15321 | TALTLLVSTALSAETLPDSH  | Negative |
| P15321 | LTLLVSTALSAETLPDSHMM  | Negative |
| P15321 | IKKITALTLLVSTALSAETL  | Negative |
| P15321 | VSTALSAETLPDSHMMQDMS  | Negative |
| P15321 | MIKKITALTLLVSTALSAET  | Negative |
| P15321 | MMQDMSMGESRRALQDSTRE  | Negative |
| P15321 | TALSAETLPDSHMMQDMSMG  | Negative |
| P15321 | ITALTLLVSTALSAETLPDS  | Negative |
| P15321 | SHMMQDMSMGESRRALQDST  | Negative |
| P15321 | SAETLPDSHMMQDMSMGESR  | Negative |
| P15321 | QDMSMGESRRALQDSTREVN  | Negative |
| P15321 | ETLPDSHMMQDMSMGESRRA  | Negative |
| P15321 | LVSTALSAETLPDSHMMQDM  | Negative |
| P15358 | EAGCPEGSACNIITDRCTCS  | Negative |
| P15358 | GPFGPGCEEAGCPEGSACNI  | Negative |
| P15358 | RCQGPFGPGCEEAGCPEGSA  | Negative |
| P15358 | LFTVAIVRCQGPFGPGCEEA  | Negative |
| P15358 | QGPFGPGCEEAGCPEGSACN  | Negative |
| P15358 | LAILLFTVAIVRCQGPFGP   | Negative |
| P15358 | ILLFTVAIVRCQGPFGPGC   | Negative |
| P15358 | AILLFTVAIVRCQGPFGPG   | Negative |
| P15358 | FTVAIVRCQGPFGPGCEEAG  | Negative |
| P15358 | LLFTVAIVRCQGPFGPGCEE  | Negative |
| P15358 | CPEGSACNIITDRCTCSGVR  | Negative |
| P15358 | TVAIIVRCQGPFGPGCEEAGC | Negative |
| P15358 | FGPGCEEAGCPEGSACNIIT  | Negative |
| P15358 | MIKLAILLLFTVAIVRCQGP  | Negative |
| P15358 | AGCPEGSACNIITDRCTCSG  | Negative |
| P15358 | LLLFTVAIVRCQGPFGPGCE  | Negative |
| P15358 | PGCEEAGCPEGSACNIITDR  | Negative |
| P15358 | IKLAILLLFTVAIVRCQGPF  | Negative |
| P15358 | EEAGCPEGSACNIITDRCTC  | Negative |
| P15358 | VAIVRCQGPFGPGCEEAGCP  | Negative |
| P15358 | AIVRCQGPFGPGCEEAGCPE  | Negative |
| P15358 | VRCQGPFGPGCEEAGCPEGS  | Negative |

|        |                        |          |
|--------|------------------------|----------|
| P15358 | PFGPGCEEAGCPEGSACNII   | Negative |
| P15358 | GCPEGSACNIITDRCTCSGV   | Negative |
| P15358 | CEEAGCPEGSACNIITDRCT   | Negative |
| P15358 | GPGCEEAGCPEGSACNIITD   | Negative |
| P15358 | CQGPFGPGCEEAGCPEGSAC   | Negative |
| P15358 | GCEEAGCPEGSACNIITDRC   | Negative |
| P15358 | IVRCQGPFGPGCEEAGCPEG   | Negative |
| P15399 | DVLGVSSMMTDKNLKKKIEG   | Negative |
| P15399 | LDVLGVSSMMTDKNLKKKIE   | Negative |
| P15399 | VLGVSSMMTDKNLKKKIEGN   | Negative |
| P15399 | KNLKKKIEGNWRTVYLAASS   | Negative |
| P15399 | TDKNLKKKIEGNWRTVYLA    | Negative |
| P15399 | MTDKNLKKKIEGNWRTVYLA   | Negative |
| P15399 | MRVILLLLTLDVLGVSSMMT   | Negative |
| P15399 | GNWRTVYLAASSVEKINEGS   | Negative |
| P15399 | KIEGNWRTVYLAASSVEKIN   | Negative |
| P15399 | VSSMMTDKNLKKKIEGNWRT   | Negative |
| P15399 | SSMMTDKNLKKKIEGNWRTV   | Negative |
| P15399 | RVILLLLTLDVLGVSSMMTD   | Negative |
| P15399 | LGVSSMMTDKNLKKKIEGNW   | Negative |
| P15399 | KKKIEGNWRTVYLAASSVEK   | Negative |
| P15399 | IEGNWRTVYLAASSVEKINE   | Negative |
| P15399 | GVSSMMTDKNLKKKIEGNWR   | Negative |
| P15399 | KKIEGNWRTVYLAASSVEKI   | Negative |
| P15399 | LLLTLDDLVLGVSSMMTDKNL  | Negative |
| P15399 | LTLDDLVLGVSSMMTDKNLKK  | Negative |
| P15399 | ILLLLTLDVLGVSSMMTDKN   | Negative |
| P15399 | SMMTDKNLKKKIEGNWRTVY   | Negative |
| P15399 | MMTDKNLKKKIEGNWRTVYL   | Negative |
| P15399 | DKNLKKKIEGNWRTVYLAAS   | Negative |
| P15399 | LLTLDDLVLGVSSMMTDKNLKK | Negative |
| P15399 | LKKKIEGNWRTVYLAASSVE   | Negative |
| P15399 | NLKKKIEGNWRTVYLAASSV   | Negative |
| P15399 | EGNWRTVYLAASSVEKINEG   | Negative |
| P15399 | LLLLTLDVLGVSSMMTDKNL   | Negative |
| P15399 | TLDVLGVSSMMTDKNLKKKI   | Negative |
| P15450 | FALLATICAFAFAYVPLPNVP  | Negative |
| P15450 | TICAFAFAYVPLPNVPQPGR   | Negative |
| P15450 | VPQPGRPFPTFPGQGPFNP    | Negative |
| P15450 | VVIFIFALLATICAFAFAYVP  | Negative |
| P15450 | CAAFAYVPLPNVPQPGRPF    | Negative |
| P15450 | PGRRPFPTFPGQGPFNPKIK   | Negative |
| P15450 | YVPLPNVPQPGRPFPTFPG    | Negative |
| P15450 | ALLATICAFAFAYVPLPNVPQ  | Negative |
| P15450 | NVPQPGRPFPTFPGQGPFN    | Negative |
| P15450 | VIFIFALLATICAFAFAYVPL  | Negative |

|        |                       |          |
|--------|-----------------------|----------|
| P15450 | VPLPNVPQPGRRPFPTFPGQ  | Negative |
| P15450 | PLPNVPQPGRRPFPTFPGQG  | Negative |
| P15450 | ICAAFAYVPLPNVPQPGRRP  | Negative |
| P15450 | FAYVPLPNVPQPGRRPFPTF  | Negative |
| P15450 | LLATICA AFAYVPLPNVPQP | Negative |
| P15450 | LATICA AFAYVPLPNVPQPG | Negative |
| P15450 | GRRPFPTFPGQGPFNPKIKW  | Negative |
| P15450 | MKVVFIFALLATICA AFAY  | Negative |
| P15450 | ATICA AFAYVPLPNVPQPGR | Negative |
| P15450 | AFAYVPLPNVPQPGRRPFPT  | Negative |
| P15450 | AAFAYVPLPNVPQPGRRPFP  | Negative |
| P15450 | AYVPLPNVPQPGRRPFPTFP  | Negative |
| P15450 | QPGRRPFPTFPGQGPFNPKI  | Negative |
| P15450 | KVVVFIFALLATICA AFAYV | Negative |
| P15450 | IFALLATICA AFAYVPLPNV | Negative |
| P15450 | FIFALLATICA AFAYVPLPN | Negative |
| P15450 | PNVPQPGRRPFPTFPGQGPF  | Negative |
| P15450 | PQPGRRPFPTFPGQGPFNPK  | Negative |
| P15450 | LPNVPQPGRRPFPTFPGQGP  | Negative |
| P15452 | FANEQLAKQKGCMACHDLKA  | Negative |
| P15452 | MACHDLKAKKVGPAYADVAK  | Negative |
| P15452 | LAKQKGCMACHDLKAKKVG   | Negative |
| P15452 | ITFANEQLAKQKGCMACHDL  | Negative |
| P15452 | KQKGCMACHDLKAKKVG     | Negative |
| P15452 | KGCMACHDLKAKKVG       | Negative |
| P15452 | LLVAVVGLAGITFANEQLAK  | Negative |
| P15452 | MKKFLLVAVVGLAGITFANE  | Negative |
| P15452 | GITFANEQLAKQKGCMACHD  | Negative |
| P15452 | KKFLLVAVVGLAGITFANEQ  | Negative |
| P15452 | LAGITFANEQLAKQKGCMAC  | Negative |
| P15452 | VAVVGLAGITFANEQLAKQK  | Negative |
| P15452 | QLAKQKGCMACHDLKAKKVG  | Negative |
| P15452 | ANEQLAKQKGCMACHDLKAK  | Negative |
| P15452 | LVAVVGLAGITFANEQLAKQ  | Negative |
| P15452 | AGITFANEQLAKQKGCMACH  | Negative |
| P15452 | TFANEQLAKQKGCMACHDLK  | Negative |
| P15452 | ACHDLKAKKVG           | Negative |
| P15452 | VGLAGITFANEQLAKQKGCM  | Negative |
| P15452 | GCMACHDLKAKKVG        | Negative |
| P15452 | EQLAKQKGCMACHDLKAKKV  | Negative |
| P15452 | VVGLAGITFANEQLAKQKGC  | Negative |
| P15452 | AVVGLAGITFANEQLAKQKG  | Negative |
| P15452 | NEQLAKQKGCMACHDLKAKK  | Negative |
| P15452 | QKGCMACHDLKAKKVG      | Negative |
| P15452 | KFLLVAVVGLAGITFANEQL  | Negative |
| P15452 | GLAGITFANEQLAKQKGCM   | Negative |

|        |                       |          |
|--------|-----------------------|----------|
| P15452 | CMACHDLKAKKVGPAADVA   | Negative |
| P15452 | AKQKGCMAACHDLKAKKVGPA | Negative |
| P15453 | VLMAFPFAESTTVKMYEAL   | Negative |
| P15453 | AESTTVKMYEALPTGPGKEV  | Negative |
| P15453 | KSLFIASTMVLMAFPFAES   | Negative |
| P15453 | AFAESTTVKMYEALPTGPGK  | Negative |
| P15453 | ESTTVKMYEALPTGPGKEVG  | Negative |
| P15453 | MKSLFIASTMVLMAFPFAE   | Negative |
| P15453 | STMVLMAFPFAESTTVKMY   | Negative |
| P15453 | YEALPTGPGKEVGTVVISEA  | Negative |
| P15453 | KMYEALPTGPGKEVGTVVIS  | Negative |
| P15453 | LMAFPFAESTTVKMYEALP   | Negative |
| P15453 | FAESTTVKMYEALPTGPGKE  | Negative |
| P15453 | LPTGPGKEVGTVVISEAPGG  | Negative |
| P15453 | MYEALPTGPGKEVGTVVISE  | Negative |
| P15453 | PAFAESTTVKMYEALPTGPG  | Negative |
| P15453 | ALPTGPGKEVGTVVISEAPG  | Negative |
| P15453 | IASTMVLMAFPFAESTTVK   | Negative |
| P15453 | STTVKMYEALPTGPGKEVGT  | Negative |
| P15453 | MAFPFAESTTVKMYEALPT   | Negative |
| P15453 | TTVKMYEALPTGPGKEVGTV  | Negative |
| P15453 | LFIASTMVLMAFPFAESTT   | Negative |
| P15453 | FPAFAESTTVKMYEALPTGP  | Negative |
| P15453 | MVLMAFPFAESTTVKMYEA   | Negative |
| P15453 | TMVLMAFPFAESTTVKMYE   | Negative |
| P15453 | VKMYEALPTGPGKEVGTVVI  | Negative |
| P15453 | ASTMVLMAFPFAESTTVKM   | Negative |
| P15453 | AFPFAESTTVKMYEALPTG   | Negative |
| P15453 | TVKMYEALPTGPGKEVGTVV  | Negative |
| P15453 | SLFIASTMVLMAFPFAEST   | Negative |
| P15453 | EALPTGPGKEVGTVVISEAP  | Negative |
| P15468 | LLLLLLLTLLGLGLVQPSYG  | Negative |
| P15468 | VLLLLLLLTLLGLGLVQPSY  | Negative |
| P15468 | THVLLLLLLLTLLGLGLVQP  | Negative |
| P15468 | HVLLLLLLLTLLGLGLVQPS  | Negative |
| P15468 | YGQDRMYQRFLRQHVDPDAT  | Negative |
| P15468 | TLLGLGLVQPSYGQDRMYQR  | Negative |
| P15468 | GLGLVQPSYGQDRMYQRFLR  | Negative |
| P15468 | QDRMYQRFLRQHVDPDATGG  | Negative |
| P15468 | RTHVLLLLLLLTLLGLGLVQ  | Negative |
| P15468 | ALQORTHVLLLLLLLTLLGLG | Negative |
| P15468 | LLLLLTLLGLGLVQPSYGQD  | Negative |
| P15468 | VQPSYGQDRMYQRFLRQHVD  | Negative |
| P15468 | GLVQPSYGQDRMYQRFLRQH  | Negative |
| P15468 | LVQPSYGQDRMYQRFLRQHV  | Negative |
| P15468 | LTLLGLGLVQPSYGQDRMYQ  | Negative |

|        |                      |          |
|--------|----------------------|----------|
| P15468 | DRMYQRFLRQHVDPDATGGN | Negative |
| P15468 | PSYGQDRMYQRFLRQHVDPD | Negative |
| P15468 | LLGLGLVQPSYGQDRMYQRF | Negative |
| P15468 | GQDRMYQRFLRQHVDPDATG | Negative |
| P15468 | MALQRTHVLLLLLLLTLLGL | Negative |
| P15468 | QRTHVLLLLLLLTLLGLGLV | Negative |
| P15468 | LGLGLVQPSYGQDRMYQRFL | Negative |
| P15468 | LLLTLGLGLVQPSYGQDRM  | Negative |
| P15468 | LGLVQPSYGQDRMYQRFLRQ | Negative |
| P15468 | QPSYGQDRMYQRFLRQHVDP | Negative |
| P15468 | LLLLTLGLGLVQPSYGQDR  | Negative |
| P15468 | LQRTHVLLLLLLLTLLGLGL | Negative |
| P15468 | LLLLLTLLGLGLVQPSYGQ  | Negative |
| P15468 | SYGQDRMYQRFLRQHVDPA  | Negative |
| P15473 | TLLRGPPVARAGAGAVGAGP | Negative |
| P15473 | RAGAGAVGAGPVVRCEPCDA | Negative |
| P15473 | PALWAAALTALTLLRGPPVA | Negative |
| P15473 | AGAVGAGPVVRCEPCDARAL | Negative |
| P15473 | TALTLLRGPPVARAGAGAVG | Negative |
| P15473 | LTLLRGPPVARAGAGAVGAG | Negative |
| P15473 | RPALWAAALTALTLLRGPPV | Negative |
| P15473 | LRGPPVARAGAGAVGAGPVV | Negative |
| P15473 | AGAGAVGAGPVVRCEPCDAR | Negative |
| P15473 | ALTALTLLRGPPVARAGAGA | Negative |
| P15473 | ARAGAGAVGAGPVVRCEPCD | Negative |
| P15473 | LWAAALTALTLLRGPPVARA | Negative |
| P15473 | MHPARPALWAAALTALTLLR | Negative |
| P15473 | GAVGAGPVVRCEPCDARALA | Negative |
| P15473 | GAGAVGAGPVVRCEPCDARA | Negative |
| P15473 | AAALTALTLLRGPPVARAGA | Negative |
| P15473 | PPVARAGAGAVGAGPVVRCE | Negative |
| P15473 | ARPALWAAALTALTLLRGPP | Negative |
| P15473 | PARPALWAAALTALTLLRGP | Negative |
| P15473 | ALTLLRGPPVARAGAGAVGA | Negative |
| P15473 | ALWAAALTALTLLRGPPVAR | Negative |
| P15473 | VARAGAGAVGAGPVVRCEPC | Negative |
| P15473 | HPARPALWAAALTALTLLRG | Negative |
| P15473 | AALTALTLLRGPPVARAGAG | Negative |
| P15473 | LLRGPPVARAGAGAVGAGPV | Negative |
| P15473 | GPPVARAGAGAVGAGPVVRC | Negative |
| P15473 | WAAALTALTLLRGPPVARAG | Negative |
| P15473 | PVARAGAGAVGAGPVVRCEP | Negative |
| P15473 | RGPPVARAGAGAVGAGPVVR | Negative |
| P15478 | TILIFMILATTSSTFATLGE | Negative |
| P15478 | SSTFATLGEMVTVLSIDGGG | Negative |
| P15478 | MILATTSSTFATLGEMVTVL | Negative |

|        |                       |          |
|--------|-----------------------|----------|
| P15478 | TLGEMVTVLSIDGGGIKGII  | Negative |
| P15478 | TTNSFTILIFMILATTSSTF  | Negative |
| P15478 | TSSTFATLGEMVTVLSIDGG  | Negative |
| P15478 | TVLSIDGGGIKGIIIPATILE | Negative |
| P15478 | LIFMILATTSSTFATLGEMV  | Negative |
| P15478 | FMILATTSSTFATLGEMVTV  | Negative |
| P15478 | ATTSSTFATLGEMVTVLSID  | Negative |
| P15478 | MVTVLSIDGGGIKGIIIPATI | Negative |
| P15478 | GEMVTVLSIDGGGIKGIIIPA | Negative |
| P15478 | LGEMVTVLSIDGGGIKGIIIP | Negative |
| P15478 | LATTSSTFATLGEMVTVLSI  | Negative |
| P15478 | SFTILIFMILATTSSTFATL  | Negative |
| P15478 | NSFTILIFMILATTSSTFAT  | Negative |
| P15478 | TTSSTFATLGEMVTVLSIDG  | Negative |
| P15478 | MATTNSFTILIFMILATTSS  | Negative |
| P15478 | TFATLGEMVTVLSIDGGGIK  | Negative |
| P15478 | ATLGEMVTVLSIDGGGIKGI  | Negative |
| P15478 | FATLGEMVTVLSIDGGGIKG  | Negative |
| P15478 | EMVTVLSIDGGGIKGIIIPAT | Negative |
| P15478 | TNSFTILIFMILATTSSTFA  | Negative |
| P15478 | IFMILATTSSTFATLGEMVT  | Negative |
| P15478 | ILATTSSTFATLGEMVTVLS  | Negative |
| P15478 | FTILIFMILATTSSTFATLG  | Negative |
| P15478 | VTVLSIDGGGIKGIIIPATIL | Negative |
| P15478 | STFATLGEMVTVLSIDGGGI  | Negative |
| P15478 | ATTNSFTILIFMILATTSST  | Negative |
| P15488 | IKYLLIGLSLSAMSSYSLAA  | Negative |
| P15488 | GPTLTKEALNVLSPAALDA   | Negative |
| P15488 | LSAMSSYSLAAAGPTLTKEAL | Negative |
| P15488 | KELALNVLSPAALDATWAPQ  | Negative |
| P15488 | SYSLAAAGPTLTKEALNVL   | Negative |
| P15488 | AGPTLTKEALNVLSPAALD   | Negative |
| P15488 | KYLLIGLSLSAMSSYSLAAA  | Negative |
| P15488 | SLAAAGPTLTKEALNVLSP   | Negative |
| P15488 | LAAAGPTLTKEALNVLSPA   | Negative |
| P15488 | LLIGLSLSAMSSYSLAAAGP  | Negative |
| P15488 | SLSAMSSYSLAAAGPTLTKE  | Negative |
| P15488 | SAMSSYSLAAAGPTLTKELA  | Negative |
| P15488 | YLLIGLSLSAMSSYSLAAAG  | Negative |
| P15488 | AMSSYSLAAAGPTLTKEAL   | Negative |
| P15488 | SSYSLAAAGPTLTKEALNV   | Negative |
| P15488 | MLKIKYLLIGLSLSAMSSYS  | Negative |
| P15488 | LSLSAMSSYSLAAAGPTLTKE | Negative |
| P15488 | KIKYLLIGLSLSAMSSYSLA  | Negative |
| P15488 | MSSYSLAAAGPTLTKEALN   | Negative |
| P15488 | PTLTKEALNVLSPAALDAT   | Negative |



|        |                       |          |
|--------|-----------------------|----------|
| P15488 | TLTKELALNVLSPAALDATW  | Negative |
| P15488 | AAGPTLTKEALALNVLSPAAL | Negative |
| P15488 | YSLAAAGPTLTKEALALNVLS | Negative |
| P15488 | IGLSLSAMSSYSLAAAGPTL  | Negative |
| P15488 | LKIKYLLIGLSLSAMSSYSL  | Negative |
| P15488 | TKELALNVLSPAALDATWAP  | Negative |
| P15488 | GLSLSAMSSYSLAAAGPTLT  | Negative |
| P15488 | LTKELALNVLSPAALDATWA  | Negative |
| P15488 | AAAGPTLTKEALALNVLSPAA | Negative |
| P15497 | QSSWDRVKDFATVYVEAIKD  | Negative |
| P15497 | LFLTGSQARHFWQQDDPQSS  | Negative |
| P15497 | LTAVLFLTGSQARHFWQQD   | Negative |
| P15497 | KAVVLTAVLFLTGSQARHF   | Negative |
| P15497 | SWDRVKDFATVYVEAIKDSG  | Negative |
| P15497 | DPQSSWDRVKDFATVYVEAI  | Negative |
| P15497 | AVLFLTGSQARHFWQQDDPQ  | Negative |
| P15497 | RHFWQQDDPQSSWDRVKDFA  | Negative |
| P15497 | AVVLTAVLFLTGSQARHFW   | Negative |
| P15497 | SQARHFWQQDDPQSSWDRVK  | Negative |
| P15497 | WQQDDPQSSWDRVKDFATVY  | Negative |
| P15497 | TLAVLFLTGSQARHFWQQDD  | Negative |
| P15497 | MKAVVLTAVLFLTGSQARH   | Negative |
| P15497 | HFWQQDDPQSSWDRVKDFAT  | Negative |
| P15497 | QQDDPQSSWDRVKDFATVYV  | Negative |
| P15497 | LAVLFLTGSQARHFWQQDDP  | Negative |
| P15497 | GSQARHFWQQDDPQSSWDRV  | Negative |
| P15497 | SSWDRVKDFATVYVEAIKDS  | Negative |
| P15497 | QDDPQSSWDRVKDFATVYVE  | Negative |
| P15497 | QARHFWQQDDPQSSWDRVKD  | Negative |
| P15497 | VLFLTGSQARHFWQQDDPQS  | Negative |
| P15497 | PQSSWDRVKDFATVYVEAIK  | Negative |
| P15497 | DDPQSSWDRVKDFATVYVEA  | Negative |
| P15497 | LTGSQARHFWQQDDPQSSWD  | Negative |
| P15497 | ARHFWQQDDPQSSWDRVKDF  | Negative |
| P15497 | FLTGSQARHFWQQDDPQSSW  | Negative |
| P15497 | TGSQARHFWQQDDPQSSWDR  | Negative |
| P15497 | VLTLAVLFLTGSQARHFWQQ  | Negative |
| P15497 | FWQQDDPQSSWDRVKDFATV  | Negative |
| P15515 | FALVLALMISMISADSHEKR  | Negative |
| P15515 | ALVLALMISMISADSHEKRH  | Negative |
| P15515 | MISADSHEKRHHGYRRKFHE  | Negative |
| P15515 | SMISADSHEKRHHGYRRKFH  | Negative |
| P15515 | YRRKFHEKHHSREFPFYGD   | Negative |
| P15515 | SHEKRHHGYRRKFHEKHHS   | Negative |
| P15515 | LVLALMISMISADSHEKRHH  | Negative |
| P15515 | KRHHGYRRKFHEKHHSREF   | Negative |

|        |                      |          |
|--------|----------------------|----------|
| P15515 | ALMISMISADSHEKRHHGYR | Negative |
| P15515 | LALMISMISADSHEKRHHGY | Negative |
| P15515 | RHHGYRRKFHEKHHSREFP  | Negative |
| P15515 | ISMISADSHEKRHHGYRRKF | Negative |
| P15515 | ISADSHEKRHHGYRRKFHEK | Negative |
| P15515 | GYRRKFHEKHHSREFPFYG  | Negative |
| P15515 | SADSHEKRHHGYRRKFHEKH | Negative |
| P15515 | VLALMISMISADSHEKRHHG | Negative |
| P15515 | HGYRRKFHEKHHSREFPFY  | Negative |
| P15515 | FFVFALVLALMISMISADSH | Negative |
| P15515 | MISMISADSHEKRHHGYRRK | Negative |
| P15515 | KFFVFALVLALMISMISADS | Negative |
| P15515 | DSHEKRHHGYRRKFHEKHHS | Negative |
| P15515 | HHGYRRKFHEKHHSREFPF  | Negative |
| P15515 | RRKFHEKHHSREFPFYGDY  | Negative |
| P15515 | LMISMISADSHEKRHHGYRR | Negative |
| P15515 | ADSHEKRHHGYRRKFHEKHH | Negative |
| P15515 | HEKRHHGYRRKFHEKHHSR  | Negative |
| P15515 | EKRHHGYRRKFHEKHHSRE  | Negative |
| P15515 | FVFALVLALMISMISADSHE | Negative |
| P15515 | MKFFVFALVLALMISMISAD | Negative |
| P15516 | AKRHHGYKRKFHEKHHSRGR | Negative |
| P15516 | HGYKRKFHEKHHSRGRYSN  | Negative |
| P15516 | GADSHAKRHHGYKRKFHEKH | Negative |
| P15516 | DSHAKRHHGYKRKFHEKHHS | Negative |
| P15516 | FALILALMLSMTGADSHAKR | Negative |
| P15516 | YKRKFHEKHHSRGRYSNYL  | Negative |
| P15516 | LALMLSMTGADSHAKRHHGY | Negative |
| P15516 | SHAKRHHGYKRKFHEKHHSR | Negative |
| P15516 | MKFFVFALILALMLSMTGAD | Negative |
| P15516 | TGADSHAKRHHGYKRKFHEK | Negative |
| P15516 | SMTGADSHAKRHHGYKRKFH | Negative |
| P15516 | ALMLSMTGADSHAKRHHGYK | Negative |
| P15516 | RHHGYKRKFHEKHHSRGRYR | Negative |
| P15516 | MLSMTGADSHAKRHHGYKRK | Negative |
| P15516 | ADSHAKRHHGYKRKFHEKHH | Negative |
| P15516 | HHGYKRKFHEKHHSRGRYS  | Negative |
| P15516 | GYKRKFHEKHHSRGRYSNY  | Negative |
| P15516 | LMLSMTGADSHAKRHHGYKR | Negative |
| P15516 | LILALMLSMTGADSHAKRHH | Negative |
| P15516 | MTGADSHAKRHHGYKRKFHE | Negative |
| P15516 | LSMTGADSHAKRHHGYKRKF | Negative |
| P15516 | HAKRHHGYKRKFHEKHHSR  | Negative |
| P15516 | KRHHGYKRKFHEKHHSRGRY | Negative |
| P15516 | ILALMLSMTGADSHAKRHHG | Negative |
| P15516 | FVFALILALMLSMTGADSHA | Negative |

|        |                       |          |
|--------|-----------------------|----------|
| P15516 | KRKFHEKHHSRGRYSNYLY   | Negative |
| P15516 | ALILALMLSMTGADSHAKRH  | Negative |
| P15516 | FFVFALILALMLSMTGADSH  | Negative |
| P15516 | KFFVFALILALMLSMTGADS  | Negative |
| P15522 | EPKDEIYMESQPTD TSAQVI | Negative |
| P15522 | ATSLASLNEPKDEIYMESQP  | Negative |
| P15522 | EIYMESQPTD TSAQVIMSNH | Negative |
| P15522 | ASLNEPKDEIYMESQPTDTS  | Negative |
| P15522 | KDEIYMESQPTD TSAQVIMS | Negative |
| P15522 | AATSLASLNEPKDEIYMESQ  | Negative |
| P15522 | LASLAATSLASLNEPKDEIY  | Negative |
| P15522 | IYMESQPTD TSAQVIMSNHQ | Negative |
| P15522 | LNEPKDEIYMESQPTD TSAQ | Negative |
| P15522 | MKFFAVLLLASLAATSLASL  | Negative |
| P15522 | ASLAATSLASLNEPKDEIYM  | Negative |
| P15522 | LLLASLAATSLASLNEPKDE  | Negative |
| P15522 | PKDEIYMESQPTD TSAQVIM | Negative |
| P15522 | TSLASLNEPKDEIYMESQPT  | Negative |
| P15522 | DEIYMESQPTD TSAQVIMSN | Negative |
| P15522 | SLAATSLASLNEPKDEIYME  | Negative |
| P15522 | LAATSLASLNEPKDEIYMES  | Negative |
| P15522 | KFFAVLLLASLAATSLASLN  | Negative |
| P15522 | LASLNEPKDEIYMESQPTDT  | Negative |
| P15522 | LLASLAATSLASLNEPKDEI  | Negative |
| P15522 | FFAVLLLASLAATSLASLNE  | Negative |
| P15522 | ESQPTD TSAQVIMSNHQVSS | Negative |
| P15522 | MESQPTD TSAQVIMSNHQVS | Negative |
| P15522 | NEPKDEIYMESQPTD TSAQV | Negative |
| P15522 | SLASLNEPKDEIYMESQPTD  | Negative |
| P15522 | YMESQPTD TSAQVIMSNHQV | Negative |
| P15522 | SLNEPKDEIYMESQPTD TSA | Negative |
| P15522 | AVLLLASLAATSLASLNEPK  | Negative |
| P15522 | VLLLASLAATSLASLNEPKD  | Negative |
| P15570 | NATACTATQQTAAAYKTLVSI | Negative |
| P15570 | CTATQQTAAAYKTLVSILSDA | Negative |
| P15570 | AAVAAALVGSANATACTATQ  | Negative |
| P15570 | ANATACTATQQTAAAYKTLVS | Negative |
| P15570 | ACTATQQTAAAYKTLVSILSD | Negative |
| P15570 | TAAAYKTLVSILSDASFNQCS | Negative |
| P15570 | VGSANATACTATQQTAAAYKT | Negative |
| P15570 | TACTATQQTAAAYKTLVSILS | Negative |
| P15570 | ATQQTAAAYKTLVSILSDASF | Negative |
| P15570 | ALLAAVAAALVGSANATACT  | Negative |
| P15570 | AVAAALVGSANATACTATQQ  | Negative |
| P15570 | LAAVAAALVGSANATACTAT  | Negative |
| P15570 | GSANATACTATQQTAAAYKTL | Negative |

|        |                       |          |
|--------|-----------------------|----------|
| P15570 | QTAAYKTLVSILSDASFNQC  | Negative |
| P15570 | QQTAAAYKTLVSILSDASFNQ | Negative |
| P15570 | TALLAAVAAALVGSANATAC  | Negative |
| P15570 | ATACTATQQTAAAYKTLVSIL | Negative |
| P15570 | TATQQTAAAYKTLVSILSDAS | Negative |
| P15570 | VAAALVGSANATACTATQQT  | Negative |
| P15570 | ALVGSANATACTATQQTAAAY | Negative |
| P15570 | NFTALLAAVAAALVGSANAT  | Negative |
| P15570 | AAALVGSANATACTATQQTAA | Negative |
| P15570 | LVGSANATACTATQQTAAAYK | Negative |
| P15570 | AAAYKTLVSILSDASFNQCST | Negative |
| P15570 | MNFTALLAAVAAALVGSANA  | Negative |
| P15570 | TQQTAAAYKTLVSILSDASFN | Negative |
| P15570 | SANATACTATQQTAAAYKTLV | Negative |
| P15570 | FTALLAAVAAALVGSANATA  | Negative |
| P15570 | AALVGSANATACTATQQTAA  | Negative |
| P15644 | AAAEFSASFSGTDIQUFIN   | Negative |
| P15644 | AEFSASFSGTDIQUFINTV   | Negative |
| P15644 | LTLIFAALLFRPAAAEFS    | Negative |
| P15644 | ANVIRSFSLTLIFAALLFR   | Negative |
| P15644 | ALLFRPAAAEFSASFSGTD   | Negative |
| P15644 | SLTLIFAALLFRPAAAEF    | Negative |
| P15644 | LLFRPAAAEFSASFSGTDI   | Negative |
| P15644 | LFRPAAAEFSASFSGTDIQ   | Negative |
| P15644 | LIFAALLFRPAAAEFSASF   | Negative |
| P15644 | NVIRSFSLTLIFAALLFRP   | Negative |
| P15644 | FRPAAAEFSASFSGTDIQE   | Negative |
| P15644 | LLIFAALLFRPAAAEFSAS   | Negative |
| P15644 | MIIANVIRSFSLTLIFAAL   | Negative |
| P15644 | IANVIRSFSLTLIFAALLF   | Negative |
| P15644 | AAEFASFSGTDIQUFINT    | Negative |
| P15644 | RPAAAEFSASFSGTDIQUF   | Negative |
| P15644 | RSFSLTLIFAALLFRPAAA   | Negative |
| P15644 | FSLTLIFAALLFRPAAAE    | Negative |
| P15644 | AALLFRPAAAEFSASFSGT   | Negative |
| P15644 | SFSLTLIFAALLFRPAAE    | Negative |
| P15644 | IRSFSLTLIFAALLFRPAA   | Negative |
| P15644 | PAAAEFSASFSGTDIQUFI   | Negative |
| P15644 | IIANVIRSFSLTLIFAALL   | Negative |
| P15644 | EEFSASFSGTDIQUFINTVS  | Negative |
| P15644 | FAALLFRPAAAEFSASFSG   | Negative |
| P15644 | EFASFSGTDIQUFINTVSK   | Negative |
| P15644 | VIRSFSLTLIFAALLFRPA   | Negative |
| P15644 | IFAALLFRPAAAEFSASF    | Negative |
| P15644 | FSASFSGTDIQUFINTVSKN  | Negative |
| P15691 | AEGGQKPHEVVKFMDVYQRS  | Negative |

|        |                      |          |
|--------|----------------------|----------|
| P15691 | MAEGGQKPHEVVKFMDVYQR | Negative |
| P15691 | WSQAAPMAEGGQKPHEVVKF | Negative |
| P15691 | WVHWSLALLLYLHHAKWSQA | Negative |
| P15691 | KWSQAAPMAEGGQKPHEVVK | Negative |
| P15691 | LLLYLHHAKWSQAAPMAEGG | Negative |
| P15691 | APMAEGGQKPHEVVKFMDVY | Negative |
| P15691 | MNFLLSWVHWSLALLLYLHH | Negative |
| P15691 | VHWSLALLLYLHHAKWSQAA | Negative |
| P15691 | HHAKWSQAAPMAEGGQKPHE | Negative |
| P15691 | LLSWVHWSLALLLYLHHAKW | Negative |
| P15691 | LHHAKWSQAAPMAEGGQKPH | Negative |
| P15691 | PMAEGGQKPHEVVKFMDVYQ | Negative |
| P15691 | LYLHHAKWSQAAPMAEGGQK | Negative |
| P15691 | SWVHWSLALLLYLHHAKWSQ | Negative |
| P15691 | FLLSWVHWSLALLLYLHHAK | Negative |
| P15691 | SQAAPMAEGGQKPHEVVKFM | Negative |
| P15691 | ALLLYLHHAKWSQAAPMAEG | Negative |
| P15691 | HAKWSQAAPMAEGGQKPHEV | Negative |
| P15691 | AKWSQAAPMAEGGQKPHEVV | Negative |
| P15691 | WSLALLLYLHHAKWSQAAPM | Negative |
| P15691 | YLHHAKWSQAAPMAEGGQKP | Negative |
| P15691 | QAAPMAEGGQKPHEVVKFMD | Negative |
| P15691 | HWSLALLLYLHHAKWSQAAP | Negative |
| P15691 | NFLLSWVHWSLALLLYLHHA | Negative |
| P15691 | LSWVHWSLALLLYLHHAKWS | Negative |
| P15691 | AAPMAEGGQKPHEVVKFMDV | Negative |
| P15691 | SLALLLYLHHAKWSQAAPMA | Negative |
| P15691 | LLYLHHAKWSQAAPMAEGGQ | Negative |
| P15693 | LLLGLRIHLSFGVIPVEEE  | Negative |
| P15693 | HLSFGVIPVEEENPVFWNQK | Negative |
| P15693 | ENPVFWNQKAKEALDVAKKL | Negative |
| P15693 | IPVEEENPVFWNQKAKEALD | Negative |
| P15693 | VIPVEEENPVFWNQKAKEAL | Negative |
| P15693 | VEEENPVFWNQKAKEALDVA | Negative |
| P15693 | LGLRIHLSFGVIPVEEENPV | Negative |
| P15693 | VFWNQKAKEALDVAKKLQPI | Negative |
| P15693 | SFGVIPVEEENPVFWNQKAK | Negative |
| P15693 | MQGDWVLLLLLGLRIHLSFG | Negative |
| P15693 | LRIHLSFGVIPVEEENPVFW | Negative |
| P15693 | PVFWNQKAKEALDVAKKLQP | Negative |
| P15693 | DWVLLLLLGLRIHLSFGVIP | Negative |
| P15693 | LLLGLRIHLSFGVIPVEEEN | Negative |
| P15693 | NPVFWNQKAKEALDVAKKLQ | Negative |
| P15693 | LLGLRIHLSFGVIPVEEENP | Negative |
| P15693 | FGVIPVEEENPVFWNQKAKE | Negative |
| P15693 | GVIPVEEENPVFWNQKAKEA | Negative |

|        |                      |          |
|--------|----------------------|----------|
| P15693 | RIHLSFGVIPVEEENPVFWN | Negative |
| P15693 | WVLLLLLGLRIHLSFGVIPV | Negative |
| P15693 | EENPVFWNQKAKEALDVAKK | Negative |
| P15693 | QGDWVLLLLLGLRIHLSFGV | Negative |
| P15693 | GLRIHLSFGVIPVEEENPVF | Negative |
| P15693 | LLLLLGLRIHLSFGVIPVEE | Negative |
| P15693 | EEENPVFWNQKAKEALDVAK | Negative |
| P15693 | PVEEENPVFWNQKAKEALDV | Negative |
| P15693 | GDWVLLLLLGLRIHLSFGVI | Negative |
| P15693 | LSFGVIPVEEENPVFWNQKA | Negative |
| P15693 | IHLSFGVIPVEEENPVFWNQ | Negative |
| P15703 | AFNLGVKNNDGTCKSTSDYE | Negative |
| P15703 | IGELAFNLGVKNNDGTCKST | Negative |
| P15703 | FTASQVSAIGELAFNLGVKN | Negative |
| P15703 | TLATAATALFFTASQVSAIG | Negative |
| P15703 | ATALFFTASQVSAIGELAFN | Negative |
| P15703 | TASQVSAIGELAFNLGVKNN | Negative |
| P15703 | LATAATALFFTASQVSAIGE | Negative |
| P15703 | AIGELAFNLGVKNNDGTCKS | Negative |
| P15703 | FFTASQVSAIGELAFNLGVK | Negative |
| P15703 | GELAFNLGVKNNDGTCKSTS | Negative |
| P15703 | ELAFNLGVKNNDGTCKSTSD | Negative |
| P15703 | VSAIGELAFNLGVKNNDGTC | Negative |
| P15703 | ATAATALFFTASQVSAIGEL | Negative |
| P15703 | ALFFTASQVSAIGELAFNLG | Negative |
| P15703 | TTLATAATALFFTASQVSAI | Negative |
| P15703 | QVSAIGELAFNLGVKNNDGT | Negative |
| P15703 | MRFSTTLATAATALFFTASQ | Negative |
| P15703 | LAFNLGVKNNDGTCKSTSDY | Negative |
| P15703 | STTLATAATALFFTASQVSA | Negative |
| P15703 | SAIGELAFNLGVKNNDGTCK | Negative |
| P15703 | SQVSAIGELAFNLGVKNNDG | Negative |
| P15703 | ASQVSAIGELAFNLGVKNND | Negative |
| P15703 | LFFTASQVSAIGELAFNLGV | Negative |
| P15703 | AATALFFTASQVSAIGELAF | Negative |
| P15703 | FNLGVKNNDGTCKSTSDYET | Negative |
| P15703 | FSTTLATAATALFFTASQVS | Negative |
| P15703 | RFSTTLATAATALFFTASQV | Negative |
| P15703 | TALFFTASQVSAIGELAFNL | Negative |
| P15703 | NLGVKNNDGTCKSTSDYETE | Negative |
| P15737 | GVCYGVIGNNLPSRSDVVQL | Negative |
| P15737 | VQSIGVCYGVIGNNLPSRSD | Negative |
| P15737 | AFAAVPTSVQSIGVCYGVIG | Negative |
| P15737 | TSVQSIGVCYGVIGNNLPSR | Negative |
| P15737 | ARKDVASMFAAALFIGAFAA | Negative |
| P15737 | KDVASMFAAALFIGAFAAVP | Negative |

|        |                       |          |
|--------|-----------------------|----------|
| P15737 | DVASMFAAALFIGAFAAVPT  | Negative |
| P15737 | FIGAFAAVPTSVQSIGVCYG  | Negative |
| P15737 | SIGVCYGVIGNNLPSRSDVV  | Negative |
| P15737 | PTSVQSIGVCYGVIGNNLPS  | Negative |
| P15737 | VPTSVQSIGVCYGVIGNNLP  | Negative |
| P15737 | QSIGVCYGVIGNNLPSRSDV  | Negative |
| P15737 | AALFIGAFAAVPTSVQSIGV  | Negative |
| P15737 | IGAFAAVPTSVQSIGVCYGV  | Negative |
| P15737 | ALFIGAFAAVPTSVQSIGVC  | Negative |
| P15737 | AVPTSVQSIGVCYGVIGNNL  | Negative |
| P15737 | VASMFAAALFIGAFAAVPTS  | Negative |
| P15737 | MARKDVASMFAAALFIGAFA  | Negative |
| P15737 | AAALFIGAFAAVPTSVQSIG  | Negative |
| P15737 | SVQSIGVCYGVIGNNLPSRS  | Negative |
| P15737 | RKDVASMFAAALFIGAFAAV  | Negative |
| P15737 | IGVCYGVIGNNLPSRSDVVQ  | Negative |
| P15737 | FAAALFIGAFAAVPTSVQSI  | Negative |
| P15737 | MFAAALFIGAFAAVPTSVQS  | Negative |
| P15737 | SMFAAALFIGAFAAVPTSVQ  | Negative |
| P15737 | AAVPTSVQSIGVCYGVIGNN  | Negative |
| P15737 | ASMFAAALFIGAFAAVPTSV  | Negative |
| P15737 | FAAVPTSVQSIGVCYGVIGN  | Negative |
| P15737 | GAFAAVPTSVQSIGVCYGVI  | Negative |
| P15879 | MIQSPQKCYAYSINQKAYSN  | Negative |
| P15879 | ILCLVLSAGVIAPVTSGMIQ  | Negative |
| P15879 | AGVIAPVTSGMIQSPQKCYA  | Negative |
| P15879 | TSGMIQSPQKCYAYSINQKA  | Negative |
| P15879 | LVL SAGVIAPVTSGMIQSPQ | Negative |
| P15879 | MKGLRKSILCLVLSAGVIAP  | Negative |
| P15879 | SILCLVLSAGVIAPVTSGMI  | Negative |
| P15879 | SGMIQSPQKCYAYSINQKAY  | Negative |
| P15879 | GLRKSILCLVLSAGVIAPVT  | Negative |
| P15879 | SPQKCYAYSINQKAYSNTYQ  | Negative |
| P15879 | IAPVTSGMIQSPQKCYAYSI  | Negative |
| P15879 | KSILCLVLSAGVIAPVTSGM  | Negative |
| P15879 | KGLRKSILCLVLSAGVIAPV  | Negative |
| P15879 | LSAGVIAPVTSGMIQSPQKC  | Negative |
| P15879 | LRKSILCLVLSAGVIAPVTS  | Negative |
| P15879 | GMIQSPQKCYAYSINQKAYS  | Negative |
| P15879 | QSPQKCYAYSINQKAYSNTY  | Negative |
| P15879 | QKCYAYSINQKAYSNTYQEF  | Negative |
| P15879 | CLVLSAGVIAPVTSGMIQSP  | Negative |
| P15879 | VLSAGVIAPVTSGMIQSPQK  | Negative |
| P15879 | VIAPVTSGMIQSPQKCYAYS  | Negative |
| P15879 | VTSGMIQSPQKCYAYSINQK  | Negative |
| P15879 | LCLVLSAGVIAPVTSGMIQS  | Negative |

|        |                       |          |
|--------|-----------------------|----------|
| P15879 | PVTSGMIQSPQKCYAYSINQ  | Negative |
| P15879 | PQKCYAYSINQKAYSNTYQE  | Negative |
| P15879 | GVIAPVTSGMIQSPQKCYAY  | Negative |
| P15879 | APVTSGMIQSPQKCYAYSIN  | Negative |
| P15879 | SAGVIAPVTSGMIQSPQKCY  | Negative |
| P15879 | RKSILCLVLSAGVIAPVTSG  | Negative |
| P15917 | SMSCLVTAITLSGPVFIPLV  | Negative |
| P15917 | VISMCLVTAITLSGPVFIP   | Negative |
| P15917 | FIPLVQGAGGHGDVGMHVKE  | Negative |
| P15917 | ISMCLVTAITLSGPVFIPL   | Negative |
| P15917 | SGPVFIPLVQGAGGHGDVGM  | Negative |
| P15917 | FIKVISMCLVTAITLSGPV   | Negative |
| P15917 | MNIKKEFIKVISMCLVTAI   | Negative |
| P15917 | CLVTAITLSGPVFIPLVQGA  | Negative |
| P15917 | SCLVTAITLSGPVFIPLVQG  | Negative |
| P15917 | IKKEFIKVISMCLVTAITL   | Negative |
| P15917 | IKVISMCLVTAITLSGPVF   | Negative |
| P15917 | LVTAITLSGPVFIPLVQGAG  | Negative |
| P15917 | VFIPLVQGAGGHGDVGMHVK  | Negative |
| P15917 | VTAITLSGPVFIPLVQGAGG  | Negative |
| P15917 | IPLVQGAGGHGDVGMHVKEK  | Negative |
| P15917 | KVISMCLVTAITLSGPVFI   | Negative |
| P15917 | ITLSGPVFIPLVQGAGGHGD  | Negative |
| P15917 | LVQGAGGHGDVGMHVKEKEK  | Negative |
| P15917 | MSCLVTAITLSGPVFIPLVQ  | Negative |
| P15917 | KKEFIKVISMCLVTAITLS   | Negative |
| P15917 | TAITLSGPVFIPLVQGAGGH  | Negative |
| P15917 | TLSGPVFIPLVQGAGGHGDV  | Negative |
| P15917 | EFIKVISMCLVTAITLSGP   | Negative |
| P15917 | KEFIKVISMCLVTAITLSG   | Negative |
| P15917 | GPVFIPLVQGAGGHGDVGMH  | Negative |
| P15917 | PVFIPLVQGAGGHGDVGMHV  | Negative |
| P15917 | NIKKEFIKVISMCLVTAIT   | Negative |
| P15917 | LSGPVFIPLVQGAGGHGDVG  | Negative |
| P15917 | PLVQGAGGHGDVGMHVKEKE  | Negative |
| P15922 | ALASIVATCLMSTPALAATA  | Negative |
| P15922 | TPALAATAQAPQKLQIPTLS  | Negative |
| P15922 | AQAPQKLQIPTLSYDDH SVM | Negative |
| P15922 | MKVITFSRRSALASIVATCL  | Negative |
| P15922 | AATAQAPQKLQIPTLSYDDH  | Negative |
| P15922 | PALAATAQAPQKLQIPTLSY  | Negative |
| P15922 | RSALASIVATCLMSTPALAA  | Negative |
| P15922 | TAQAPQKLQIPTLSYDDHSV  | Negative |
| P15922 | TCLMSTPALAATAQAPQKLQ  | Negative |
| P15922 | LMSTPALAATAQAPQKLQIP  | Negative |
| P15922 | RRSALASIVATCLMSTPALA  | Negative |



|        |                      |          |
|--------|----------------------|----------|
| P15922 | TFSRRSALASIVATCLMSTP | Negative |
| P15922 | ALAATAQAPQKLQIPTLSYD | Negative |
| P15922 | VATCLMSTPALAATAQAPQK | Negative |
| P15922 | KVITFSRRSALASIVATCLM | Negative |
| P15922 | ITFSRRSALASIVATCLMST | Negative |
| P15922 | FSRRSALASIVATCLMSTPA | Negative |
| P15922 | STPALAATAQAPQKLQIPTL | Negative |
| P15922 | SIVATCLMSTPALAATAQAP | Negative |
| P15922 | LAATAQAPQKLQIPTLSYDD | Negative |
| P15922 | SALASIVATCLMSTPALAAT | Negative |
| P15922 | ATAQAPQKLQIPTLSYDDHS | Negative |
| P15922 | MSTPALAATAQAPQKLQIPT | Negative |
| P15922 | CLMSTPALAATAQAPQKLQI | Negative |
| P15922 | IVATCLMSTPALAATAQAPQ | Negative |
| P15922 | ATCLMSTPALAATAQAPQKL | Negative |
| P15922 | LASIVATCLMSTPALAATAQ | Negative |
| P15922 | SRRSALASIVATCLMSTPAL | Negative |
| P15922 | VITFSRRSALASIVATCLMS | Negative |
| P15926 | TSILLNAQSDIKANTVTEDT | Negative |
| P15926 | STSILLNAQSDIKANTVTED | Negative |
| P15926 | DIKANTVTEDTPVTEQAVET | Negative |
| P15926 | FDKLAIALMSTSILLNAQSD | Negative |
| P15926 | LMSTSILLNAQSDIKANTVT | Negative |
| P15926 | RKKQKLFPDKLAIALMSTSI | Negative |
| P15926 | LPFDKLAIALMSTSILLNAQ | Negative |
| P15926 | DKLAIALMSTSILLNAQSDI | Negative |
| P15926 | NAQSDIKANTVTEDTPVTEQ | Negative |
| P15926 | ILLNAQSDIKANTVTEDTPV | Negative |
| P15926 | SDIKANTVTEDTPVTEQAVE | Negative |
| P15926 | KLAIALMSTSILLNAQSDIK | Negative |
| P15926 | AQSDIKANTVTEDTPVTEQA | Negative |
| P15926 | ALMSTSILLNAQSDIKANTV | Negative |
| P15926 | KQKLFPDKLAIALMSTSILL | Negative |
| P15926 | KANTVTEDTPVTEQAVETPQ | Negative |
| P15926 | IKANTVTEDTPVTEQAVETP | Negative |
| P15926 | PFDKLAIALMSTSILLNAQS | Negative |
| P15926 | IALMSTSILLNAQSDIKANT | Negative |
| P15926 | MRKKQKLFPDKLAIALMSTS | Negative |
| P15926 | QSDIKANTVTEDTPVTEQAV | Negative |
| P15926 | QKLFPDKLAIALMSTSILLN | Negative |
| P15926 | KKQKLFPDKLAIALMSTSIL | Negative |
| P15926 | LNAQSDIKANTVTEDTPVTE | Negative |
| P15926 | AIALMSTSILLNAQSDIKAN | Negative |
| P15926 | SILLNAQSDIKANTVTEDTP | Negative |
| P15926 | LAIALMSTSILLNAQSDIKA | Negative |
| P15926 | LLNAQSDIKANTVTEDTPVT | Negative |

|        |                       |          |
|--------|-----------------------|----------|
| P15926 | KLPFDKLAIALMSTSILLNA  | Negative |
| P16027 | NDKLVELSKSDDNWVMPGKN  | Negative |
| P16027 | MSRFVTSVSALAMLALAPAA  | Negative |
| P16027 | VTSVSALAMLALAPAAALSSG | Negative |
| P16027 | YANDKLVELSKSDDNWVMPG  | Negative |
| P16027 | TSVSALAMLALAPAAALSSGA | Negative |
| P16027 | LALAPAAALSSGAYANDKLVE | Negative |
| P16027 | FVTSVSALAMLALAPAAALSS | Negative |
| P16027 | ALAPAAALSSGAYANDKLVEL | Negative |
| P16027 | LSSGAYANDKLVELSKSDDN  | Negative |
| P16027 | SRFVTSVSALAMLALAPAAAL | Negative |
| P16027 | DKLVELSKSDDNWVMPGKNY  | Negative |
| P16027 | AMLALAPAAALSSGAYANDKL | Negative |
| P16027 | SGAYANDKLVELSKSDDNWV  | Negative |
| P16027 | VSALAMLALAPAAALSSGAYA | Negative |
| P16027 | SVSALAMLALAPAAALSSGAY | Negative |
| P16027 | SSGAYANDKLVELSKSDDNW  | Negative |
| P16027 | APAAALSSGAYANDKLVELSK | Negative |
| P16027 | ANDKLVELSKSDDNWVMPGK  | Negative |
| P16027 | AYANDKLVELSKSDDNWVMP  | Negative |
| P16027 | ALSSGAYANDKLVELSKSDD  | Negative |
| P16027 | ALAMLALAPAAALSSGAYAND | Negative |
| P16027 | KLVELSKSDDNWVMPGKNYD  | Negative |
| P16027 | PAALSSGAYANDKLVELSKS  | Negative |
| P16027 | LAMLALAPAAALSSGAYANDK | Negative |
| P16027 | RFVTSVSALAMLALAPAAALS | Negative |
| P16027 | GAYANDKLVELSKSDDNWVM  | Negative |
| P16027 | LAPAAALSSGAYANDKLVELS | Negative |
| P16027 | SALAMLALAPAAALSSGAYAN | Negative |
| P16027 | AALSSGAYANDKLVELSKSD  | Negative |
| P16030 | SKSYVLQLIFITLLLTQLNK  | Negative |
| P16030 | NKVKSTSSTLTGFTFPNFW   | Negative |
| P16030 | FITLLLTQLNKVKSTSSTLT  | Negative |
| P16030 | VKSTSSTLTGFTFPNFWNT   | Negative |
| P16030 | LYNSKSYVLQLIFITLLLTQ  | Negative |
| P16030 | TQLNKVKSTSSTLTGFTFPN  | Negative |
| P16030 | SSTLTGFTFPNFWNTQENG   | Negative |
| P16030 | NSKSYVLQLIFITLLLTQLN  | Negative |
| P16030 | TSSTLTGFTFPNFWNTQEN   | Negative |
| P16030 | LLYNSKSYVLQLIFITLLLT  | Negative |
| P16030 | SYVLQLIFITLLLTQLNKVK  | Negative |
| P16030 | TLLLTQLNKVKSTSSTLTGF  | Negative |
| P16030 | LIFITLLLTQLNKVKSTSST  | Negative |
| P16030 | QLNKVKSTSSTLTGFTFPNF  | Negative |
| P16030 | ITLLLTQLNKVKSTSSTLTG  | Negative |
| P16030 | LQLIFITLLLTQLNKVKSTS  | Negative |

|        |                       |          |
|--------|-----------------------|----------|
| P16030 | LNKVKSTSSTLTGFTFPNFW  | Negative |
| P16030 | STSSTLTGFTFPNFWSENTQE | Negative |
| P16030 | LLLTQLNKVKSTSSTLTGFT  | Negative |
| P16030 | YVLQLIFITLLLTQLNKVKS  | Negative |
| P16030 | YNSKSYVLQLIFITLLLTQL  | Negative |
| P16030 | KSYVLQLIFITLLLTQLNKV  | Negative |
| P16030 | MLLYNSKSYVLQLIFITLLL  | Negative |
| P16030 | LLTQLNKVKSTSSTLTGFTF  | Negative |
| P16030 | QLIFITLLLTQLNKVKSTSS  | Negative |
| P16030 | VLQLIFITLLLTQLNKVKST  | Negative |
| P16030 | KVKSTSSTLTGFTFPNFWSN  | Negative |
| P16030 | KSTSSTLTGFTFPNFWSENTQ | Negative |
| P16030 | LTQLNKVKSTSSTLTGFTFP  | Negative |
| P16035 | PADACSCSPVHPQQAFCNAD  | Negative |
| P16035 | LRLALGLLLLATLLRPADAC  | Negative |
| P16035 | MGAAARTLRLALGLLLLATL  | Negative |
| P16035 | SPVHPQQAFCNADVIRAKA   | Negative |
| P16035 | DACSCSPVHPQQAFCNADV   | Negative |
| P16035 | TLRLALGLLLLATLLRPADA  | Negative |
| P16035 | RTLRLALGLLLLATLLRPAD  | Negative |
| P16035 | ARTLRLALGLLLLATLLRPA  | Negative |
| P16035 | LLATLLRPADACSCSPVHPQ  | Negative |
| P16035 | ADACSCSPVHPQQAFCNADV  | Negative |
| P16035 | CSPVHPQQAFCNADVIRAK   | Negative |
| P16035 | LALGLLLLATLLRPADACSC  | Negative |
| P16035 | TLLRPADACSCSPVHPQAF   | Negative |
| P16035 | GLLLLATLLRPADACSCSPV  | Negative |
| P16035 | LLRPADACSCSPVHPQQAFC  | Negative |
| P16035 | AARTLRLALGLLLLATLLRP  | Negative |
| P16035 | ALGLLLLATLLRPADACSCS  | Negative |
| P16035 | SCSPVHPQQAFCNADVIR    | Negative |
| P16035 | LLATLLRPADACSCSPVHP   | Negative |
| P16035 | GAAARTLRLALGLLLLATLL  | Negative |
| P16035 | AAARTLRLALGLLLLATLLR  | Negative |
| P16035 | RPADACSCSPVHPQQAFCNA  | Negative |
| P16035 | CSCSPVHPQQAFCNADVIR   | Negative |
| P16035 | LATLLRPADACSCSPVHPQQ  | Negative |
| P16035 | ACSCSPVHPQQAFCNADV    | Negative |
| P16035 | RLALGLLLLATLLRPADACS  | Negative |
| P16035 | LLLLATLLRPADACSCSPVH  | Negative |
| P16035 | ATLLRPADACSCSPVHPQQA  | Negative |
| P16035 | LRPADACSCSPVHPQQAFCN  | Negative |
| P16094 | DVSFRLSGADPRSYGMFIKD  | Negative |
| P16094 | GGIVKGDVSFRLSGADPRS   | Negative |
| P16094 | ILAIFLGGIVKGDVSFRLS   | Negative |
| P16094 | IVKGDVSFRLSGADPRSYGM  | Negative |

|        |                       |          |
|--------|-----------------------|----------|
| P16094 | GSIVKGDVSFRLSGADPRSY  | Negative |
| P16094 | VKGDVSFRLSGADPRSYGMF  | Negative |
| P16094 | GDVSFRLSGADPRSYGMFIK  | Negative |
| P16094 | IFLGGIVKGDVSFRLSGAD   | Negative |
| P16094 | MSRFSVLSFLILAIFLGCSI  | Negative |
| P16094 | SFRLSGADPRSYGMFIKDLR  | Negative |
| P16094 | RFSVLSFLILAIFLGGSIVK  | Negative |
| P16094 | SFLILAIFLGGSIVKGDVSF  | Negative |
| P16094 | LSGADPRSYGMFIKDLRNAL  | Negative |
| P16094 | LAIFLGGIVKGDVSFRLSG   | Negative |
| P16094 | SVLSFLILAIFLGGSIVKGD  | Negative |
| P16094 | FRLSGADPRSYGMFIKDLRN  | Negative |
| P16094 | SGADPRSYGMFIKDLRNALP  | Negative |
| P16094 | SIVKGDVSFRLSGADPRSYG  | Negative |
| P16094 | LILAIFLGGSIVKGDVSFRL  | Negative |
| P16094 | RLSGADPRSYGMFIKDLRNA  | Negative |
| P16094 | LGGIVKGDVSFRLSGADPR   | Negative |
| P16094 | FSVLSFLILAIFLGGSIVKG  | Negative |
| P16094 | FLGGIVKGDVSFRLSGADP   | Negative |
| P16094 | KGDVSFRLSGADPRSYGMFI  | Negative |
| P16094 | SRFSVLSFLILAIFLGGSIV  | Negative |
| P16094 | LSFLILAIFLGGSIVKGDVS  | Negative |
| P16094 | AIFLGGIVKGDVSFRLSGA   | Negative |
| P16094 | VLSFLILAIFLGGSIVKGDV  | Negative |
| P16094 | VSFRLSGADPRSYGMFIKDL  | Negative |
| P16112 | ETSDHDNSLSVSIPQPSPLR  | Negative |
| P16112 | SVSIPQPSPLRVLLGTSLTI  | Negative |
| P16112 | VTLRVITA AVTVETSDHDNS | Negative |
| P16112 | RVITA AVTVETSDHDNSLSV | Negative |
| P16112 | TVETSDHDNSLSVSIPQPSP  | Negative |
| P16112 | DHDNSLSVSIPQPSPLRVLL  | Negative |
| P16112 | MTTLLWVFVTLRVITA AVTV | Negative |
| P16112 | LRVITA AVTVETSDHDNSLS | Negative |
| P16112 | VETSDHDNSLSVSIPQPSPL  | Negative |
| P16112 | NSLSVSIPQPSPLRVLLGTS  | Negative |
| P16112 | TSDHDNSLSVSIPQPSPLRV  | Negative |
| P16112 | TAAVTVETSDHDNSLSVSIP  | Negative |
| P16112 | ITA AVTVETSDHDNSLSVSI | Negative |
| P16112 | LSVSIPQPSPLRVLLGTSLT  | Negative |
| P16112 | AAVTVETSDHDNSLSVSIPQ  | Negative |
| P16112 | VTVETSDHDNSLSVSIPQPS  | Negative |
| P16112 | SDHDNSLSVSIPQPSPLRVL  | Negative |
| P16112 | AVTVETSDHDNSLSVSIPQP  | Negative |
| P16112 | HDNSLSVSIPQPSPLRVLLG  | Negative |
| P16112 | VITA AVTVETSDHDNSLSVS | Negative |
| P16112 | TLLWVFVTLRVITA AVTVET | Negative |

|        |                         |          |
|--------|-------------------------|----------|
| P16112 | WVFTLRVITA AAVTVETSDH   | Negative |
| P16112 | TLRVITA AAVTVETSDHNSL   | Negative |
| P16112 | LLWVFTLRVITA AAVTVETS   | Negative |
| P16112 | VFVFTLRVITA AAVTVETSDHD | Negative |
| P16112 | LWVFTLRVITA AAVTVETSD   | Negative |
| P16112 | SLSVSIPQPSPLRVLLGTSL    | Negative |
| P16112 | FVTLRVITA AAVTVETSDHDN  | Negative |
| P16112 | DNSLSVSIPQPSPLRVLLGT    | Negative |
| P16159 | AVAAIGNEDCTPWMSTLITP    | Negative |
| P16159 | LA AVLVSIFA AVAAIGNEDC  | Negative |
| P16159 | CTPWMSTLITPLPSCRDYVE    | Negative |
| P16159 | IGNEDCTPWMSTLITPLPSC    | Negative |
| P16159 | MASKSNCVLLLA AVLVSIFA   | Negative |
| P16159 | AAVLVSIFA AVAAIGNEDCT   | Negative |
| P16159 | VSIFA AVAAIGNEDCTPWMS   | Negative |
| P16159 | DCTPWMSTLITPLPSCRDYV    | Negative |
| P16159 | GNEDCTPWMSTLITPLPSCR    | Negative |
| P16159 | ASKSNCVLLLA AVLVSIFAA   | Negative |
| P16159 | AAIGNEDCTPWMSTLITPLP    | Negative |
| P16159 | AAVAAIGNEDCTPWMSTLIT    | Negative |
| P16159 | VAAIGNEDCTPWMSTLITPL    | Negative |
| P16159 | EDCTPWMSTLITPLPSCRDY    | Negative |
| P16159 | NCVLLLA AVLVSIFA AVAAI  | Negative |
| P16159 | SIFA AVAAIGNEDCTPWMST   | Negative |
| P16159 | FA AVAAIGNEDCTPWMSTLI   | Negative |
| P16159 | NEDCTPWMSTLITPLPSCRD    | Negative |
| P16159 | IFA AVAAIGNEDCTPWMSTL   | Negative |
| P16159 | VLLLA AVLVSIFA AVAAIGN  | Negative |
| P16159 | SKSNCVLLLA AVLVSIFA AV  | Negative |
| P16159 | SNCVLLLA AVLVSIFA AVAA  | Negative |
| P16159 | KSNCVLLLA AVLVSIFA AVA  | Negative |
| P16159 | CVLLLA AVLVSIFA AVAAIG  | Negative |
| P16159 | LLLA AVLVSIFA AVAAIGNE  | Negative |
| P16159 | AVLVSIFA AVAAIGNEDCTP   | Negative |
| P16159 | VLVSIFA AVAAIGNEDCTPW   | Negative |
| P16159 | AIGNEDCTPWMSTLITPLPS    | Negative |
| P16159 | LVSIFA AVAAIGNEDCTPWM   | Negative |
| P16216 | LIVMTPAATRKIVQRQTRNS    | Negative |
| P16216 | IAA AVLSLIVMTPAATRKIV   | Negative |
| P16216 | QRQTRNSSTAVENSA ADESE   | Negative |
| P16216 | AMIAA AVLSLIVMTPAATRK   | Negative |
| P16216 | AAVLSLIVMTPAATRKIVQR    | Negative |
| P16216 | RKIVQRQTRNSSTAVENSA A   | Negative |
| P16216 | MNSKKIGAMIAA AVLSLIVM   | Negative |
| P16216 | MIAA AVLSLIVMTPAATRKI   | Negative |
| P16216 | MTPAATRKIVQRQTRNSSTA    | Negative |

|        |                       |          |
|--------|-----------------------|----------|
| P16216 | VMTPAATRKIVQRQTRNSST  | Negative |
| P16216 | AVLSLIVMTPAATRKIVQRQ  | Negative |
| P16216 | TPAATRKIVQRQTRNSSTAV  | Negative |
| P16216 | IVQRQTRNSSTAVENSAADE  | Negative |
| P16216 | IGAMIAAAVL SLIVMTPAAT | Negative |
| P16216 | VLSLIVMTPAATRKIVQRQT  | Negative |
| P16216 | ATRKIVQRQTRNSSTAVENS  | Negative |
| P16216 | IVMTPAATRKIVQRQTRNSS  | Negative |
| P16216 | LSLIVMTPAATRKIVQRQTR  | Negative |
| P16216 | SKKIGAMIAAAVL SLIVMTP | Negative |
| P16216 | AAAVLSLIVMTPAATRKIVQ  | Negative |
| P16216 | SLIVMTPAATRKIVQRQTRN  | Negative |
| P16216 | TRKIVQRQTRNSSTAVENSA  | Negative |
| P16216 | KIGAMIAAAVL SLIVMTPAA | Negative |
| P16216 | KKIGAMIAAAVL SLIVMTPA | Negative |
| P16216 | PAATRKIVQRQTRNSSTAVE  | Negative |
| P16216 | GAMIAAAVL SLIVMTPAATR | Negative |
| P16216 | NSKKIGAMIAAAVL SLIVMT | Negative |
| P16216 | AATRKIVQRQTRNSSTAVEN  | Negative |
| P16216 | KIVQRQTRNSSTAVENSAAD  | Negative |
| P16225 | GPKGQGQDPVEGQDQDEGPG  | Negative |
| P16225 | LICETLVAQRLDRIRGPKGQ  | Negative |
| P16225 | AVFLICETLVAQRLDRIRGP  | Negative |
| P16225 | VLVAVFLICETLVAQRLDRI  | Negative |
| P16225 | PKGQGQDPVEGQDQDEGPGP  | Negative |
| P16225 | SRSFLVLVAVFLICETLVAQ  | Negative |
| P16225 | RLDRIRGPKGQGQDPVEGQD  | Negative |
| P16225 | FLICETLVAQRLDRIRGPKG  | Negative |
| P16225 | LDRIRGPKGQGQDPVEGQDQ  | Negative |
| P16225 | VAVFLICETLVAQRLDRIRG  | Negative |
| P16225 | ETLVAQRLDRIRGPKGQGQD  | Negative |
| P16225 | FLVLVAVFLICETLVAQRLD  | Negative |
| P16225 | MRSRSFLVLVAVFLICETLV  | Negative |
| P16225 | DRIRGPKGQGQDPVEGQDQD  | Negative |
| P16225 | RIRGPKGQGQDPVEGQDQDE  | Negative |
| P16225 | CETLVAQRLDRIRGPKGQGQ  | Negative |
| P16225 | TLVAQRLDRIRGPKGQGQDP  | Negative |
| P16225 | QRLDRIRGPKGQGQDPVEGQ  | Negative |
| P16225 | IRGPKGQGQDPVEGQDQDEG  | Negative |
| P16225 | ICETLVAQRLDRIRGPKGQG  | Negative |
| P16225 | RGPKGQGQDPVEGQDQDEGP  | Negative |
| P16225 | VFLICETLVAQRLDRIRGPK  | Negative |
| P16225 | RSRSFLVLVAVFLICETLVA  | Negative |
| P16225 | LVAQRLDRIRGPKGQGQDPV  | Negative |
| P16225 | SFLVLVAVFLICETLVAQRL  | Negative |
| P16225 | VAQRLDRIRGPKGQGQDPVE  | Negative |

|        |                      |          |
|--------|----------------------|----------|
| P16225 | RSFLVLVAVFLICETLVAQR | Negative |
| P16225 | AQRLDRIRGPKGQGQDPVEG | Negative |
| P16225 | LVAVFLICETLVAQRLDRIR | Negative |
| P16303 | RLYPLVWLFLAACTAWGYPS | Negative |
| P16303 | TVKGKVLGKYVNLEGFAQPV | Negative |
| P16303 | AWGYPSSPPVVNTVKGKVLG | Negative |
| P16303 | VNTVKGKVLGKYVNLEGFAQ | Negative |
| P16303 | GYPSSPPVVNTVKGKVLGKY | Negative |
| P16303 | PPVVNTVKGKVLGKYVNLEG | Negative |
| P16303 | LYPLVWLFLAACTAWGYPSS | Negative |
| P16303 | ACTAWGYPSSPPVVNTVKGK | Negative |
| P16303 | MRLYPLVWLFLAACTAWGYP | Negative |
| P16303 | SPPVVNTVKGKVLGKYVNLE | Negative |
| P16303 | CTAWGYPSSPPVVNTVKGKV | Negative |
| P16303 | AACTAWGYPSSPPVVNTVKG | Negative |
| P16303 | LFLAACTAWGYPSSPPVVNT | Negative |
| P16303 | LVWLFLAACTAWGYPSSPPV | Negative |
| P16303 | SSPPVVNTVKGKVLGKYVNL | Negative |
| P16303 | TAWGYPSSPPVVNTVKGKVL | Negative |
| P16303 | LACTAWGYPSSPPVVNTVK  | Negative |
| P16303 | VKGKVLGKYVNLEGFAQPVA | Negative |
| P16303 | VWLFLAACTAWGYPSSPPVV | Negative |
| P16303 | KGKVLGKYVNLEGFAQPVAV | Negative |
| P16303 | VVNTVKGKVLGKYVNLEGFA | Negative |
| P16303 | PVVNTVKGKVLGKYVNLEGF | Negative |
| P16303 | YPSSPPVVNTVKGKVLGKYV | Negative |
| P16303 | NTVKGKVLGKYVNLEGFAQP | Negative |
| P16303 | PSSPPVVNTVKGKVLGKYVN | Negative |
| P16303 | WLFLAACTAWGYPSSPPVVN | Negative |
| P16303 | FLAACTAWGYPSSPPVVNTV | Negative |
| P16303 | WGYPSSPPVVNTVKGKVLGK | Negative |
| P16303 | PLVWLFLAACTAWGYPSSPP | Negative |
| P16368 | SCSPVHPQQAFCNADIVIRA | Negative |
| P16368 | LPLAFCLLLLGTLLPRADAC | Negative |
| P16368 | LLGTLLPRADACSCSPVHPQ | Negative |
| P16368 | DACSCSPVHPQQAFCNADIV | Negative |
| P16368 | RADACSCSPVHPQQAFCNAD | Negative |
| P16368 | CSPVHPQQAFCNADIVIRAK | Negative |
| P16368 | GTLLPRADACSCSPVHPQQA | Negative |
| P16368 | PRADACSCSPVHPQQAFCNA | Negative |
| P16368 | AAARSLPLAFCLLLLGTLLP | Negative |
| P16368 | TLLPRADACSCSPVHPQQAF | Negative |
| P16368 | LGTLPRADACSCSPVHPQQ  | Negative |
| P16368 | GAAARSLPLAFCLLLLGTLL | Negative |
| P16368 | AFCLLLLGTLLPRADACSCS | Negative |
| P16368 | AARSLPLAFCLLLLGTLLPR | Negative |

|        |                       |          |
|--------|-----------------------|----------|
| P16368 | CLLLLGTLPRADACSCSPV   | Negative |
| P16368 | RSLPLAFCLLLLGTLPRAD   | Negative |
| P16368 | LPRADACSCSPVHPQQAFCN  | Negative |
| P16368 | ACSCSPVHPQQAFCNADIVI  | Negative |
| P16368 | ADACSCSPVHPQQAFCNADI  | Negative |
| P16368 | LAFCLLLLGTLPRADACSC   | Negative |
| P16368 | SLPLAFCLLLLGTLPRADA   | Negative |
| P16368 | LLLLGTLPRADACSCSPVH   | Negative |
| P16368 | MGAAARSLPLAFCLLLLGTL  | Negative |
| P16368 | SPVHPQQAFCNADIVIRAKA  | Negative |
| P16368 | LLLGTLPRADACSCSPVHP   | Negative |
| P16368 | CSCSPVHPQQAFCNADIVIR  | Negative |
| P16368 | ARSLPLAFCLLLLGTLPR    | Negative |
| P16368 | LLPRADACSCSPVHPQQAFC  | Negative |
| P16368 | PLAFCLLLLGTLPRADACS   | Negative |
| P16404 | LALSLTLFLLILNKVNSVET  | Negative |
| P16404 | VETISFSFSEFEPGNDNLTL  | Negative |
| P16404 | LCSVLALSLTLFLLILNKVN  | Negative |
| P16404 | KVNSVETISFSFSEFEPGND  | Negative |
| P16404 | YKLCSVLALSLTLFLLILNK  | Negative |
| P16404 | TLFLLILNKVNSVETISFSF  | Negative |
| P16404 | ATYKLCSVLALSLTLFLLIL  | Negative |
| P16404 | TYKLCSVLALSLTLFLLILN  | Negative |
| P16404 | FLLILNKVNSVETISFSFSE  | Negative |
| P16404 | LFLILNKVNSVETISFSFS   | Negative |
| P16404 | VNSVETISFSFSEFEPGNDN  | Negative |
| P16404 | KLCSVLALSLTLFLLILNKV  | Negative |
| P16404 | SLTLFLLILNKVNSVETISF  | Negative |
| P16404 | MATYKLCSVLALSLTLFLLI  | Negative |
| P16404 | LILNKVNSVETISFSFSEFE  | Negative |
| P16404 | ISFSFSEFEPGNDNLTLQGA  | Negative |
| P16404 | ILNKVNSVETISFSFSEFEP  | Negative |
| P16404 | LNKVNSVETISFSFSEFEPG  | Negative |
| P16404 | ALSLTLFLLILNKVNSVETI  | Negative |
| P16404 | LLILNKVNSVETISFSFSEF  | Negative |
| P16404 | CSVLALSLTLFLLILNKVNS  | Negative |
| P16404 | SVETISFSFSEFEPGNDNLTL | Negative |
| P16404 | SVLALSLTLFLLILNKVNSV  | Negative |
| P16404 | NKVNSVETISFSFSEFEPGN  | Negative |
| P16404 | VLALSLTLFLLILNKVNSVE  | Negative |
| P16404 | NSVETISFSFSEFEPGNDNL  | Negative |
| P16404 | LTFLFLLILNKVNSVETISFS | Negative |
| P16404 | ETISFSFSEFEPGNDNLTLQ  | Negative |
| P16404 | TISFSFSEFEPGNDNLTLQG  | Negative |
| P16444 | WLWPLVAVCTADFFRDEAER  | Negative |
| P16444 | IMRDSPVIDGHNDLPWQLLD  | Negative |



|        |                      |          |
|--------|----------------------|----------|
| P16444 | DFFRDEAERIMRDSPVIDGH | Negative |
| P16444 | LWPLVAVCTADFFRDEAERI | Negative |
| P16444 | DEAERIMRDSPVIDGHNDLP | Negative |
| P16444 | RIMRDSPVIDGHNDLPWQLL | Negative |
| P16444 | PLVAVCTADFFRDEAERIMR | Negative |
| P16444 | ADFFRDEAERIMRDSPVIDG | Negative |
| P16444 | VCTADFFRDEAERIMRDSPV | Negative |
| P16444 | EAERIMRDSPVIDGHNDLPW | Negative |
| P16444 | AVCTADFFRDEAERIMRDSP | Negative |
| P16444 | WWLWPLVAVCTADFFRDEAE | Negative |
| P16444 | ERIMRDSPVIDGHNDLPWQL | Negative |
| P16444 | MRDSPVIDGHNDLPWQLLDM | Negative |
| P16444 | RDSPVIDGHNDLPWQLLDMF | Negative |
| P16444 | TADFFRDEAERIMRDSPVID | Negative |
| P16444 | RDEAERIMRDSPVIDGHNDL | Negative |
| P16444 | DSPVIDGHNDLPWQLLDMFN | Negative |
| P16444 | SPVIDGHNDLPWQLLDMFNN | Negative |
| P16444 | FRDEAERIMRDSPVIDGHND | Negative |
| P16444 | GWWLWPLVAVCTADFFRDEA | Negative |
| P16444 | LVAVCTADFFRDEAERIMRD | Negative |
| P16444 | MWSGWWLWPLVAVCTADFFR | Negative |
| P16444 | VAVCTADFFRDEAERIMRDS | Negative |
| P16444 | SGWWLWPLVAVCTADFFRDE | Negative |
| P16444 | FFRDEAERIMRDSPVIDGHN | Negative |
| P16444 | WPLVAVCTADFFRDEAERIM | Negative |
| P16444 | CTADFFRDEAERIMRDSPVI | Negative |
| P16444 | AERIMRDSPVIDGHNDLPWQ | Negative |
| P16454 | LSIASVNVYAASESSISIGY | Negative |
| P16454 | VYAASESSISIGYAQSHVKE | Negative |
| P16454 | LLASSLIACLSIASVNVYAA | Negative |
| P16454 | SSISIGYAQSHVKENGYTLD | Negative |
| P16454 | KTLLASSLIACLSIASVNVY | Negative |
| P16454 | ACLSIASVNVYAASESSISI | Negative |
| P16454 | NVYAASESSISIGYAQSHVK | Negative |
| P16454 | MKKTLLASSLIACLSIASVN | Negative |
| P16454 | LIACLSIASVNVYAASESSI | Negative |
| P16454 | ISIGYAQSHVKENGYTLDND | Negative |
| P16454 | SIGYAQSHVKENGYTLDNDP | Negative |
| P16454 | ASVNVYAASESSISIGYAQS | Negative |
| P16454 | VNVYAASESSISIGYAQSHV | Negative |
| P16454 | AASESSISIGYAQSHVKENG | Negative |
| P16454 | ASESSISIGYAQSHVKENGY | Negative |
| P16454 | TLLASSLIACLSIASVNVYA | Negative |
| P16454 | SIASVNVYAASESSISIGYA | Negative |
| P16454 | IASVNVYAASESSISIGYAQ | Negative |
| P16454 | ESSISIGYAQSHVKENGYTL | Negative |

|        |                      |          |
|--------|----------------------|----------|
| P16454 | SESSISIGYAQSHVKENGYT | Negative |
| P16454 | IACLSIASVNVYAASESSIS | Negative |
| P16454 | CLSIASVNVYAASESSISIG | Negative |
| P16454 | LASSLIACLSIASVNVYAAS | Negative |
| P16454 | KTLLASSLIACLSIASVNV  | Negative |
| P16454 | SSLIACLSIASVNVYAASES | Negative |
| P16454 | ASSLIACLSIASVNVYAASE | Negative |
| P16454 | SVNVYAASESSISIGYAQSH | Negative |
| P16454 | YAAESSISIGYAQSHVKEN  | Negative |
| P16454 | SISIGYAQSHVKENGYTLDN | Negative |
| P16466 | KNFKLSPSGRLAASLAIIFV | Negative |
| P16466 | GRLAASLAIIFVSLNAYGNG | Negative |
| P16466 | SLAIIFVSLNAYGNGIVPDA | Negative |
| P16466 | MKSKNFKLSPSGRLAASLAI | Negative |
| P16466 | YGNGIVPDAGHQGPDVSAVN | Negative |
| P16466 | NGIVPDAGHQGPDVSAVNGG | Negative |
| P16466 | LAIIFVSLNAYGNGIVPDAG | Negative |
| P16466 | SKNFKLSPSGRLAASLAIIF | Negative |
| P16466 | RLAASLAIIFVSLNAYGNGI | Negative |
| P16466 | KSKNFKLSPSGRLAASLAI  | Negative |
| P16466 | PSGRLAASLAIIFVSLNAYG | Negative |
| P16466 | ASLAIIFVSLNAYGNGIVPD | Negative |
| P16466 | AYGNGIVPDAGHQGPDVSAV | Negative |
| P16466 | SPSGRLAASLAIIFVSLNAY | Negative |
| P16466 | NFKLSPSGRLAASLAIIFVS | Negative |
| P16466 | FKLSPSGRLAASLAIIFVSL | Negative |
| P16466 | GNGIVPDAGHQGPDVSAVNG | Negative |
| P16466 | AIIFVSLNAYGNGIVPDAGH | Negative |
| P16466 | LNAYGNGIVPDAGHQGPDVS | Negative |
| P16466 | KLSPSGRLAASLAIIFVSLN | Negative |
| P16466 | SGRLAASLAIIFVSLNAYGN | Negative |
| P16466 | FVSLNAYGNGIVPDAGHQGP | Negative |
| P16466 | NAYGNGIVPDAGHQGPDVSA | Negative |
| P16466 | SLNAYGNGIVPDAGHQGPDV | Negative |
| P16466 | LAASLAIIFVSLNAYGNGIV | Negative |
| P16466 | IIFVSLNAYGNGIVPDAGHQ | Negative |
| P16466 | IFVSLNAYGNGIVPDAGHQG | Negative |
| P16466 | LSPSGRLAASLAIIFVSLNA | Negative |
| P16466 | VSLNAYGNGIVPDAGHQGPD | Negative |
| P16611 | AALIALALLRGPPAARAGSG | Negative |
| P16611 | WAAALIALALLRGPPAARAG | Negative |
| P16611 | SGAAGTGPVVRCEPCDARAL | Negative |
| P16611 | GAAGTGPVVRCEPCDARALA | Negative |
| P16611 | GSGAAGTGPVVRCEPCDARA | Negative |
| P16611 | RARPALWAAALIALALLRGP | Negative |
| P16611 | AGSGAAGTGPVVRCEPCDAR | Negative |

|        |                      |          |
|--------|----------------------|----------|
| P16611 | LALLRGPPAARAGSGAAGTG | Negative |
| P16611 | MQRARPALWAAALIALALLR | Negative |
| P16611 | IALALLRGPPAARAGSGAAG | Negative |
| P16611 | LLRGPPAARAGSGAAGTGPV | Negative |
| P16611 | AAALIALALLRGPPAARAGS | Negative |
| P16611 | LWAAALIALALLRGPPAARA | Negative |
| P16611 | ARPALWAAALIALALLRGPP | Negative |
| P16611 | GPPAARAGSGAAGTGPVVR  | Negative |
| P16611 | ALALLRGPPAARAGSGAAGT | Negative |
| P16611 | RPALWAAALIALALLRGPPA | Negative |
| P16611 | LRGPPAARAGSGAAGTGPVV | Negative |
| P16611 | RGPPAARAGSGAAGTGPVVR | Negative |
| P16611 | QRARPALWAAALIALALLRG | Negative |
| P16611 | ALIALALLRGPPAARAGSGA | Negative |
| P16611 | PPAARAGSGAAGTGPVVRCE | Negative |
| P16611 | ALWAAALIALALLRGPPAAR | Negative |
| P16611 | RAGSGAAGTGPVVRCEPCDA | Negative |
| P16611 | AARAGSGAAGTGPVVRCEPC | Negative |
| P16611 | ARAGSGAAGTGPVVRCEPCD | Negative |
| P16611 | ALLRGPPAARAGSGAAGTGP | Negative |
| P16611 | PAARAGSGAAGTGPVVRCEP | Negative |
| P16611 | PALWAAALIALALLRGPPAA | Negative |
| P16612 | HWTLALLLYLHHAKWSQAAP | Negative |
| P16612 | YLHHAKWSQAAPTTEGEQKA | Negative |
| P16612 | TTEGEQKAHEVVKFMDVYQR | Negative |
| P16612 | QAAPTTEGEQKAHEVVKFMD | Negative |
| P16612 | VHWTLALLLYLHHAKWSQAA | Negative |
| P16612 | AAPTTEGEQKAHEVVKFMDV | Negative |
| P16612 | TLALLLYLHHAKWSQAAPTT | Negative |
| P16612 | WVHWTLALLLYLHHAKWSQA | Negative |
| P16612 | PTTEGEQKAHEVVKFMDVYQ | Negative |
| P16612 | LLLYLHHAKWSQAAPTTEGE | Negative |
| P16612 | SQAAPTTEGEQKAHEVVKFM | Negative |
| P16612 | LHHAKWSQAAPTTEGEQKAH | Negative |
| P16612 | NFLLSWVHWTLALLLYLHHA | Negative |
| P16612 | MNFLLSWVHWTLALLLYLHH | Negative |
| P16612 | SWVHWTLALLLYLHHAKWSQ | Negative |
| P16612 | LLSWVHWTLALLLYLHHAKW | Negative |
| P16612 | AKWSQAAPTTEGEQKAHEVV | Negative |
| P16612 | KWSQAAPTTEGEQKAHEVVK | Negative |
| P16612 | LLYLHHAKWSQAAPTTEGEQ | Negative |
| P16612 | HAKWSQAAPTTEGEQKAHEV | Negative |
| P16612 | TEGEQKAHEVVKFMDVYQRS | Negative |
| P16612 | APTTEGEQKAHEVVKFMDVY | Negative |
| P16612 | FLLSWVHWTLALLLYLHHAK | Negative |
| P16612 | LYLHHAKWSQAAPTTEGEQK | Negative |

|        |                      |          |
|--------|----------------------|----------|
| P16612 | WSQAAPTTEGEQKAHEVVKF | Negative |
| P16612 | LSWVHWTLALLYLHHAKWS  | Negative |
| P16612 | HHAKWSQAAPTTEGEQKAHE | Negative |
| P16612 | WTLALLYLHHAKWSQAAPT  | Negative |
| P16612 | ALLYLHHAKWSQAAPTTEG  | Negative |
| P16619 | LCTMALCNQVLSAPLAADTP | Negative |
| P16619 | TPTACCFSYTSRQIPQNFIA | Negative |
| P16619 | APLAADTPTACCFSYTSRQI | Negative |
| P16619 | VLLCTMALCNQVLSAPLAAD | Negative |
| P16619 | MQVSTAALAVLLCTMALCNQ | Negative |
| P16619 | QVSTAALAVLLCTMALCNQV | Negative |
| P16619 | CTMALCNQVLSAPLAADTPT | Negative |
| P16619 | TAALAVLLCTMALCNQVLSA | Negative |
| P16619 | DTPTACCFSYTSRQIPQNF  | Negative |
| P16619 | LCNQVLSAPLAADTPTACCF | Negative |
| P16619 | VLSAPLAADTPTACCFSYTS | Negative |
| P16619 | AALAVLLCTMALCNQVLSAP | Negative |
| P16619 | LLCTMALCNQVLSAPLAADT | Negative |
| P16619 | CNQVLSAPLAADTPTACCF  | Negative |
| P16619 | TMALCNQVLSAPLAADTPTA | Negative |
| P16619 | LAVLLCTMALCNQVLSAPLA | Negative |
| P16619 | MALCNQVLSAPLAADTPTAC | Negative |
| P16619 | QVLSAPLAADTPTACCFSYT | Negative |
| P16619 | VSTAALAVLLCTMALCNQVL | Negative |
| P16619 | SAPLAADTPTACCFSYTSRQ | Negative |
| P16619 | ALCNQVLSAPLAADTPTACC | Negative |
| P16619 | STAALAVLLCTMALCNQVLS | Negative |
| P16619 | PLAADTPTACCFSYTSRQIP | Negative |
| P16619 | NQVLSAPLAADTPTACCFSY | Negative |
| P16619 | LSAPLAADTPTACCFSYTSR | Negative |
| P16619 | LAADTPTACCFSYTSRQIPQ | Negative |
| P16619 | ALAVLLCTMALCNQVLSAPL | Negative |
| P16619 | AADTPTACCFSYTSRQIPQN | Negative |
| P16619 | ADTPTACCFSYTSRQIPQNF | Negative |
| P16636 | LFLGQLQFCPLLRCAPQAPR | Negative |
| P16636 | GQLQFCPLLRCAPQAPREPP | Negative |
| P16636 | REPPAAPGAWRQTIQWENNG | Negative |
| P16636 | PQAPREPPAAPGAWRQTIQW | Negative |
| P16636 | PAAPGAWRQTIQWENNGQVF | Negative |
| P16636 | PREPPAAPGAWRQTIQWENN | Negative |
| P16636 | TVLFLGQLQFCPLLRCAPQA | Negative |
| P16636 | LLRCAPQAPREPPAAPGAWR | Negative |
| P16636 | LGQLQFCPLLRCAPQAPREP | Negative |
| P16636 | PLLRCAPQAPREPPAAPGAW | Negative |
| P16636 | FCPLLRCAPQAPREPPAAPG | Negative |
| P16636 | CAPQAPREPPAAPGAWRQTI | Negative |

|        |                       |          |
|--------|-----------------------|----------|
| P16636 | RCAPQAPREPPAAPGAWRQT  | Negative |
| P16636 | CPLLRCAPQAPREPPAAPGA  | Negative |
| P16636 | AWTVLFLGQLQFCPLLRCAP  | Negative |
| P16636 | QAPREPPAAPGAWRQTIQWE  | Negative |
| P16636 | PPAAPGAWRQTIQWENNGQV  | Negative |
| P16636 | LQFCPLLRCAPQAPREPPAA  | Negative |
| P16636 | WTVLFLGQLQFCPLLRCAPQ  | Negative |
| P16636 | EPPAAPGAWRQTIQWENNGQ  | Negative |
| P16636 | QLQFCPLLRCAPQAPREPPA  | Negative |
| P16636 | QFCPLLRCAPQAPREPPAAP  | Negative |
| P16636 | FAWTVLFLGQLQFCPLLRCAP | Negative |
| P16636 | MRFAWTVLFLGQLQFCPLLRC | Negative |
| P16636 | RFAWTVLFLGQLQFCPLLRC  | Negative |
| P16636 | FLGQLQFCPLLRCAPQAPRE  | Negative |
| P16636 | LRCAPQAPREPPAAPGAWRQ  | Negative |
| P16636 | APQAPREPPAAPGAWRQTIQ  | Negative |
| P16636 | APREPPAAPGAWRQTIQWEN  | Negative |
| P16699 | TISMSEANGAALSNNPNNQ   | Negative |
| P16699 | VLPTISMSEANGAALSNNP   | Negative |
| P16699 | NGAALSNNPNNQTTKNVYSW  | Negative |
| P16699 | FFSVLPTISMSEANGAALS   | Negative |
| P16699 | FSVLPTISMSEANGAALSNN  | Negative |
| P16699 | YKKVAFVMAFIMFFSVLPTI  | Negative |
| P16699 | VMAFIMFFSVLPTISMSEA   | Negative |
| P16699 | MAFIMFFSVLPTISMSEAN   | Negative |
| P16699 | KVAFVMAFIMFFSVLPTISM  | Negative |
| P16699 | ISMSEANGAALSNNPNNQTT  | Negative |
| P16699 | AFVMAFIMFFSVLPTISMSS  | Negative |
| P16699 | SMSSEANGAALSNNPNNQTT  | Negative |
| P16699 | MFFSVLPTISMSEANGAAL   | Negative |
| P16699 | ANGAALSNNPNNQTTKNVYS  | Negative |
| P16699 | VAFVMAFIMFFSVLPTISMS  | Negative |
| P16699 | PTISMSEANGAALSNNPNN   | Negative |
| P16699 | KVYKKVAFVMAFIMFFSVLP  | Negative |
| P16699 | VYKKVAFVMAFIMFFSVLPT  | Negative |
| P16699 | SSEANGAALSNNPNNQTTKN  | Negative |
| P16699 | MKVYKKVAFVMAFIMFFSVL  | Negative |
| P16699 | EANGAALSNNPNNQTTKNVY  | Negative |
| P16699 | SVLPTISMSEANGAALSNNP  | Negative |
| P16699 | MSSEANGAALSNNPNNQTTK  | Negative |
| P16699 | FIMFFSVLPTISMSEANGA   | Negative |
| P16699 | IMFFSVLPTISMSEANGAA   | Negative |
| P16699 | LPTISMSEANGAALSNNPNA  | Negative |
| P16699 | SEANGAALSNNPNNQTTKNV  | Negative |
| P16699 | FVMAFIMFFSVLPTISMSE   | Negative |
| P16699 | KKVAFVMAFIMFFSVLPTIS  | Negative |

|        |                       |          |
|--------|-----------------------|----------|
| P16700 | GHVQATELLNSSYDVSRELF  | Negative |
| P16700 | LLAGHVQATELLNSSYDVSR  | Negative |
| P16700 | KKNSLALVASLLLAGHVQAT  | Negative |
| P16700 | ASLLLAGHVQATELLNSSYD  | Negative |
| P16700 | ALVASLLLAGHVQATELLNS  | Negative |
| P16700 | LLKKNSLALVASLLLAGHVQ  | Negative |
| P16700 | SLALVASLLLAGHVQATELL  | Negative |
| P16700 | LLNSSYDVSRELFAALNPPF  | Negative |
| P16700 | TELLNSSYDVSRELFAALNP  | Negative |
| P16700 | VASLLLAGHVQATELLNSSY  | Negative |
| P16700 | VNLLKKNSLALVASLLLAGH  | Negative |
| P16700 | HVQATELLNSSYDVSRELFA  | Negative |
| P16700 | AVNLLKKNSLALVASLLLAG  | Negative |
| P16700 | MAVNLLKKNSLALVASLLLA  | Negative |
| P16700 | NSSYDVSRELFAALNPPFEQ  | Negative |
| P16700 | AGHVQATELLNSSYDVSREL  | Negative |
| P16700 | LKKNSLALVASLLLAGHVQA  | Negative |
| P16700 | NSLALVASLLLAGHVQATEL  | Negative |
| P16700 | KNSLALVASLLLAGHVQATE  | Negative |
| P16700 | ELLNSSYDVSRELFAALNPP  | Negative |
| P16700 | SLLLAGHVQATELLNSSYDV  | Negative |
| P16700 | LNSSYDVSRELFAALNPPFE  | Negative |
| P16700 | LVASLLLAGHVQATELLNSS  | Negative |
| P16700 | LAGHVQATELLNSSYDVSRE  | Negative |
| P16700 | QATELLNSSYDVSRELFAAL  | Negative |
| P16700 | ATELLNSSYDVSRELFAALN  | Negative |
| P16700 | NLLKKNSLALVASLLLAGHV  | Negative |
| P16700 | LLLAGHVQATELLNSSYDVS  | Negative |
| P16700 | VQATELLNSSYDVSRELFAA  | Negative |
| P16850 | TATGPYCYAGMGLPINPLEG  | Negative |
| P16850 | KSSISPLLLATVLVSVFAAA  | Negative |
| P16850 | TVLVSVFAAATATGPYCYAG  | Negative |
| P16850 | ISPLLLATVLVSVFAAATAT  | Negative |
| P16850 | ATATGPYCYAGMGLPINPLE  | Negative |
| P16850 | VFAAATATGPYCYAGMGLPI  | Negative |
| P16850 | SKSSISPLLLATVLVSVFAA  | Negative |
| P16850 | AAATATGPYCYAGMGLPINP  | Negative |
| P16850 | SPLLLATVLVSVFAAATATG  | Negative |
| P16850 | PLLLATVLVSVFAAATATGP  | Negative |
| P16850 | LVSFVFAAATATGPYCYAGMG | Negative |
| P16850 | YCYAGMGLPINPLEGCREYV  | Negative |
| P16850 | ATVLVSVFAAATATGPYCYA  | Negative |
| P16850 | ASKSSISPLLLATVLVSVFA  | Negative |
| P16850 | SSISPLLLATVLVSVFAAAT  | Negative |
| P16850 | GPYCYAGMGLPINPLEGCRE  | Negative |
| P16850 | VLVSVFAAATATGPYCYAGM  | Negative |

|        |                        |          |
|--------|------------------------|----------|
| P16850 | SVFAAATATGPYCYAGMGLP   | Negative |
| P16850 | FAAATATGPYCYAGMGLPIN   | Negative |
| P16850 | TGPYCYAGMGLPINPLEGCR   | Negative |
| P16850 | ATGPYCYAGMGLPINPLEGC   | Negative |
| P16850 | SISPLLLATVLVSVFAAATA   | Negative |
| P16850 | PYCYAGMGLPINPLEGCREY   | Negative |
| P16850 | MASKSSISPLLLATVLVSVF   | Negative |
| P16850 | AATATGPYCYAGMGLPINPL   | Negative |
| P16850 | VSVFAAATATGPYCYAGMGL   | Negative |
| P16850 | LATVLVSVFAAATATGPYCY   | Negative |
| P16850 | LLLATVLVSVFAAATATGPY   | Negative |
| P16850 | CYAGMGLPINPLEGCREYVA   | Negative |
| P16851 | VSVFAAAAATGPYCYPGMGL   | Negative |
| P16851 | SITHLLLA AVL VSVFAAAAA | Negative |
| P16851 | AATGPYCYPGMGLPSNPLEG   | Negative |
| P16851 | AAVLVSVFAAAAATGPYCYP   | Negative |
| P16851 | VFAAAAATGPYCYPGMGLPS   | Negative |
| P16851 | MASKSSITHLLLA AVL VSVF | Negative |
| P16851 | CYPGMGLPSNPLEGCREYVA   | Negative |
| P16851 | LVSVFAAAAATGPYCYPGMG   | Negative |
| P16851 | ATGPYCYPGMGLPSNPLEGC   | Negative |
| P16851 | YCYPGMGLPSNPLEGCREYV   | Negative |
| P16851 | GPYCYPGMGLPSNPLEGCRE   | Negative |
| P16851 | FAAAAATGPYCYPGMGLPSN   | Negative |
| P16851 | TGPYCYPGMGLPSNPLEGCR   | Negative |
| P16851 | AAAAATGPYCYPGMGLPSNP   | Negative |
| P16851 | LLLA AVL VSVFAAAAATGPY | Negative |
| P16851 | SKSSITHLLLA AVL VSVFAA | Negative |
| P16851 | ASKSSITHLLLA AVL VSVFA | Negative |
| P16851 | ITHLLLA AVL VSVFAAAAAT | Negative |
| P16851 | LA AVL VSVFAAAAATGPYCY | Negative |
| P16851 | AAAATGPYCYPGMGLPSNPL   | Negative |
| P16851 | SSITHLLLA AVL VSVFAAAA | Negative |
| P16851 | THLLLA AVL VSVFAAAAATG | Negative |
| P16851 | AAATGPYCYPGMGLPSNPLE   | Negative |
| P16851 | PYCYPGMGLPSNPLEGCREY   | Negative |
| P16851 | VLVSVFAAAAATGPYCYPGM   | Negative |
| P16851 | HLLLA AVL VSVFAAAAATGP | Negative |
| P16851 | SVFAAAAATGPYCYPGMGLP   | Negative |
| P16851 | KSSITHLLLA AVL VSVFAAA | Negative |
| P16851 | AVLVSVFAAAAATGPYCYPG   | Negative |
| P16860 | PSRALLLLFLHLAFLGGRS    | Negative |
| P16860 | RALLLLFLHLAFLGGRSHP    | Negative |
| P16860 | PLGSPGSASDLETSGLQEQR   | Negative |
| P16860 | LAFLGGRSHPLGSPGSASDL   | Negative |
| P16860 | HPLGSPGSASDLETSGLQEQ   | Negative |

|        |                      |          |
|--------|----------------------|----------|
| P16860 | RSHPLGSPGSASDLETSGLQ | Negative |
| P16860 | LFLHLAFLGGRSHPLGSPGS | Negative |
| P16860 | PQTAPSRALLLLLFLHLAFL | Negative |
| P16860 | TAPSRALLLLLFLHLAFLGG | Negative |
| P16860 | SRALLLLLFLHLAFLGGRSH | Negative |
| P16860 | GRSHPLGSPGSASDLETSGL | Negative |
| P16860 | QTAPSRALLLLLFLHLAFLG | Negative |
| P16860 | LGGRSHPLGSPGSASDLET  | Negative |
| P16860 | LLLLLFLHLAFLGGRSHPLG | Negative |
| P16860 | LLFLHLAFLGGRSHPLGSPG | Negative |
| P16860 | GGRSHPLGSPGSASDLETSG | Negative |
| P16860 | LHLAFLGGRSHPLGSPGSAS | Negative |
| P16860 | HLAFLGGRSHPLGSPGSASD | Negative |
| P16860 | APSRALLLLLFLHLAFLGGR | Negative |
| P16860 | FLGGRSHPLGSPGSASDLET | Negative |
| P16860 | MDPQTAPSRALLLLLFLHLA | Negative |
| P16860 | SHPLGSPGSASDLETSGLQE | Negative |
| P16860 | ALLLLLFLHLAFLGGRSHPL | Negative |
| P16860 | AFLGGRSHPLGSPGSASDLE | Negative |
| P16860 | FLHLAFLGGRSHPLGSPGSA | Negative |
| P16860 | GSPGSASDLETSGLQEQRNH | Negative |
| P16860 | LLLFLHLAFLGGRSHPLGSP | Negative |
| P16860 | DPQTAPSRALLLLLFLHLAF | Negative |
| P16860 | LGSPGSASDLETSGLQEQRN | Negative |
| P16869 | ITKPSLLAGCIALALLPSAA | Negative |
| P16869 | YQAITKPSLLAGCIALALLP | Negative |
| P16869 | LALLPSAAFAAPATEETVIV | Negative |
| P16869 | GCIALALLPSAAFAAPATEE | Negative |
| P16869 | AITKPSLLAGCIALALLPSA | Negative |
| P16869 | NRDNQYQAITKPSLLAGCIA | Negative |
| P16869 | MLSTQFNRDNQYQAITKPSL | Negative |
| P16869 | TKPSLLAGCIALALLPSAAF | Negative |
| P16869 | LPSAAFAAPATEETVIVEGS | Negative |
| P16869 | SLLAGCIALALLPSAAFAAP | Negative |
| P16869 | FNRDNQYQAITKPSLLAGCI | Negative |
| P16869 | LLPSAAFAAPATEETVIVEG | Negative |
| P16869 | QAITKPSLLAGCIALALLPS | Negative |
| P16869 | DNQYQAITKPSLLAGCIALA | Negative |
| P16869 | QFNRDNQYQAITKPSLLAGC | Negative |
| P16869 | IALALLPSAAFAAPATEETV | Negative |
| P16869 | ALLPSAAFAAPATEETVIVE | Negative |
| P16869 | LAGCIALALLPSAAFAAPAT | Negative |
| P16869 | RDNQYQAITKPSLLAGCIAL | Negative |
| P16869 | PSLLAGCIALALLPSAAFAA | Negative |
| P16869 | QYQAITKPSLLAGCIALALL | Negative |
| P16869 | STQFNRDNQYQAITKPSLLA | Negative |



|        |                        |          |
|--------|------------------------|----------|
| P16869 | KPSLLAGCIALALLPSAAFA   | Negative |
| P16869 | TQFNRDNQYQAITKPSLLAG   | Negative |
| P16869 | LSTQFNRDNQYQAITKPSLL   | Negative |
| P16869 | ALALLPSAAFAAPATEETVI   | Negative |
| P16869 | CIALALLPSAAFAAPATEET   | Negative |
| P16869 | NQYQAITKPSLLAGCIALAL   | Negative |
| P16869 | LLAGCIALALLPSAAFAAPA   | Negative |
| P16933 | FLYAFVAFGALVAALPGGHP   | Negative |
| P16933 | GHPGTTTTPPVTTTTVTVTTPP | Negative |
| P16933 | AFGALVAALPGGHPGTTTTPP  | Negative |
| P16933 | GALVAALPGGHPGTTTTPPVT  | Negative |
| P16933 | LPVVFLYAFVAFGALVAALP   | Negative |
| P16933 | PGGHPGTTTTPPVTTTTVTVT  | Negative |
| P16933 | FGALVAALPGGHPGTTTTPPV  | Negative |
| P16933 | VFLYAFVAFGALVAALPGGH   | Negative |
| P16933 | ALPGGHPGTTTTPPVTTTTVT  | Negative |
| P16933 | PVVFLYAFVAFGALVAALPG   | Negative |
| P16933 | ALVAALPGGHPGTTTTPPVTT  | Negative |
| P16933 | FARLPVVFLYAFVAFGALVA   | Negative |
| P16933 | GTTTTPPVTTTTVTVTTPPSTT | Negative |
| P16933 | TTTTPPVTTTTVTVTTPPSTTT | Negative |
| P16933 | VVFLYAFVAFGALVAALPGG   | Negative |
| P16933 | RLPVVFLYAFVAFGALVAAL   | Negative |
| P16933 | VAFGALVAALPGGHPGTTTTP  | Negative |
| P16933 | MFARLPVVFLYAFVAFGALV   | Negative |
| P16933 | FVAFGALVAALPGGHPGTTT   | Negative |
| P16933 | PGTTTTPPVTTTTVTVTTPPST | Negative |
| P16933 | ARLPVVFLYAFVAFGALVAA   | Negative |
| P16933 | GGHPGTTTTPPVTTTTVTVTTP | Negative |
| P16933 | LVAALPGGHPGTTTTPPVTTT  | Negative |
| P16933 | LPGGHPGTTTTPPVTTTTVTVT | Negative |
| P16933 | YAFVAFGALVAALPGGHPGT   | Negative |
| P16933 | VAALPGGHPGTTTTPPVTTTTV | Negative |
| P16933 | AALPGGHPGTTTTPPVTTTTVT | Negative |
| P16933 | AFVAFGALVAALPGGHPGTT   | Negative |
| P16933 | HPGTTTTPPVTTTTVTVTTPPS | Negative |
| P16947 | SVAVAVAVLGAGFANQTEVK   | Negative |
| P16947 | LRKLKTGTASVAVAVAVLGA   | Negative |
| P16947 | TGTASVAVAVAVLGAGFANQ   | Negative |
| P16947 | LKTGTASVAVAVAVLGAGFA   | Negative |
| P16947 | LGAGFANQTEVKAAEKKVEA   | Negative |
| P16947 | QYSLRKLKTGTASVAVAVAV   | Negative |
| P16947 | KTGTASVAVAVAVLGAGFAN   | Negative |
| P16947 | GTASVAVAVAVLGAGFANQT   | Negative |
| P16947 | GAGFANQTEVKAAEKKVEAK   | Negative |
| P16947 | DTNKQYSLRKLKTGTASVAV   | Negative |

|        |                      |          |
|--------|----------------------|----------|
| P16947 | VLGAGFANQTEVKAAEKKVE | Negative |
| P16947 | KQYSLRKLKTGTASVAVAVA | Negative |
| P16947 | MARKDTNKQYSLRKLKTGTA | Negative |
| P16947 | AVAVLGAGFANQTEVKAAEK | Negative |
| P16947 | KDTNKQYSLRKLKTGTASVA | Negative |
| P16947 | VAVAVAVLGAGFANQTEVKA | Negative |
| P16947 | SLRKLKTGTASVAVAVAVLG | Negative |
| P16947 | TNKQYSLRKLKTGTASVAVA | Negative |
| P16947 | VAVAVLGAGFANQTEVKAAE | Negative |
| P16947 | KLKTGTASVAVAVAVLGAGF | Negative |
| P16947 | ARKDTNKQYSLRKLKTGTAS | Negative |
| P16947 | TASVAVAVAVLGAGFANQTE | Negative |
| P16947 | RKLKTGTASVAVAVAVLGAG | Negative |
| P16947 | NKQYSLRKLKTGTASVAVAV | Negative |
| P16947 | AVAVAVLGAGFANQTEVKAA | Negative |
| P16947 | RKDTNKQYSLRKLKTGTASV | Negative |
| P16947 | YSLRKLKTGTASVAVAVAVL | Negative |
| P16947 | VAVLGAGFANQTEVKAAEKK | Negative |
| P16947 | ASVAVAVAVLGAGFANQTEV | Negative |
| P16950 | FLLAFLLVFTAVFGSMPMEF | Negative |
| P16950 | VFGSMPMEFAKAETDTAPAI | Negative |
| P16950 | MFKRRALGFLLAFLLVFTAV | Negative |
| P16950 | TAVFGSMPMEFAKAETDTAP | Negative |
| P16950 | MEFAKAETDTAPAIANVVG  | Negative |
| P16950 | SMPMEFAKAETDTAPAIANV | Negative |
| P16950 | RALGFLLAFLLVFTAVFGSM | Negative |
| P16950 | AVFGSMPMEFAKAETDTAPA | Negative |
| P16950 | KRRALGFLLAFLLVFTAVFG | Negative |
| P16950 | RRALGFLLAFLLVFTAVFGS | Negative |
| P16950 | LAFLLVFTAVFGSMPMEFAK | Negative |
| P16950 | LLVFTAVFGSMPMEFAKAET | Negative |
| P16950 | FAKAETDTAPAIANVVG    | Negative |
| P16950 | VFTAVFGSMPMEFAKAETDT | Negative |
| P16950 | AKAETDTAPAIANVVG     | Negative |
| P16950 | FKRRALGFLLAFLLVFTAVF | Negative |
| P16950 | EFAKAETDTAPAIANVVG   | Negative |
| P16950 | MPMEFAKAETDTAPAIANV  | Negative |
| P16950 | LLAFLLVFTAVFGSMPMEFA | Negative |
| P16950 | LVFTAVFGSMPMEFAKAETD | Negative |
| P16950 | AFLLVFTAVFGSMPMEFAKA | Negative |
| P16950 | PMEFAKAETDTAPAIANVVG | Negative |
| P16950 | GSMPMEFAKAETDTAPAIAN | Negative |
| P16950 | FGSMPMEFAKAETDTAPAI  | Negative |
| P16950 | FLLVFTAVFGSMPMEFAKAE | Negative |
| P16950 | KAETDTAPAIANVVG      | Negative |
| P16950 | LGFLLAFLLVFTAVFGSMPM | Negative |

|        |                       |          |
|--------|-----------------------|----------|
| P16950 | ALGFLLAFLLVFTAVFGSMP  | Negative |
| P16950 | GFLLAFLLVFTAVFGSMPME  | Negative |
| P16975 | EETVVEETGLPVGANPVQVE  | Negative |
| P16975 | CLAGRALAAPQTEAAEEMVA  | Negative |
| P16975 | EEMVAEETVVEETGLPVGAN  | Negative |
| P16975 | AEEMVAEETVVEETGLPVGA  | Negative |
| P16975 | LAGRALAAPQTEAAEEMVAE  | Negative |
| P16975 | GRALAAPQTEAAEEMVAEET  | Negative |
| P16975 | IFFLLCLAGRALAAPQTEAA  | Negative |
| P16975 | LLCLAGRALAAPQTEAAEEM  | Negative |
| P16975 | RAWIFFLLCLAGRALAAPQT  | Negative |
| P16975 | AAEEMVAEETVVEETGLPVG  | Negative |
| P16975 | FLLCLAGRALAAPQTEAAEE  | Negative |
| P16975 | AAPQTEAAEEMVAEETVVEE  | Negative |
| P16975 | AEETVVEETGLPVGANPVQV  | Negative |
| P16975 | LAAPQTEAAEEMVAEETVVE  | Negative |
| P16975 | WIFFLLCLAGRALAAPQTEA  | Negative |
| P16975 | MVAEETVVEETGLPVGANPV  | Negative |
| P16975 | AGRALAAPQTEAAEEMVAEE  | Negative |
| P16975 | EAAEEMVAEETVVEETGLPV  | Negative |
| P16975 | QTEAAEEMVAEETVVEETGL  | Negative |
| P16975 | TEAAEEMVAEETVVEETGLP  | Negative |
| P16975 | PQTEAAEEMVAEETVVEETG  | Negative |
| P16975 | LCLAGRALAAPQTEAAEEMV  | Negative |
| P16975 | APQTEAAEEMVAEETVVEET  | Negative |
| P16975 | RALAAPQTEAAEEMVAEETV  | Negative |
| P16975 | ALAAPQTEAAEEMVAEETVV  | Negative |
| P16975 | MRAWIFFLLCLAGRALAAPQ  | Negative |
| P16975 | FFLLCLAGRALAAPQTEAAE  | Negative |
| P16975 | EMVAEETVVEETGLPVGANP  | Negative |
| P16975 | VAEETVVEETGLPVGANPVQ  | Negative |
| P17050 | LDNGLLQTTPPMGWLAWERFR | Negative |
| P17050 | VAQVLMLDNGLLQTTPPMGWL | Negative |
| P17050 | WLAWERFRCNINCDEDPKNC  | Negative |
| P17050 | KTVLLLGHVAQVLMLDNGLL  | Negative |
| P17050 | HVAQVLMLDNGLLQTTPPMGW | Negative |
| P17050 | TVLLLGHVAQVLMLDNGLLQ  | Negative |
| P17050 | TPPMGWLAWERFRCNINCDE  | Negative |
| P17050 | LGHVAQVLMLDNGLLQTTPPM | Negative |
| P17050 | GHVAQVLMLDNGLLQTTPPMG | Negative |
| P17050 | LLQTTPPMGWLAWERFRCNIN | Negative |
| P17050 | GLLQTTPPMGWLAWERFRCNI | Negative |
| P17050 | DNGLLQTTPPMGWLAWERFRC | Negative |
| P17050 | MLLKTVLLLGHVAQVLMLDN  | Negative |
| P17050 | QTTPPMGWLAWERFRCNINCD | Negative |
| P17050 | PPMGWLAWERFRCNINCDED  | Negative |

|        |                       |          |
|--------|-----------------------|----------|
| P17050 | QVLMLDNGLLQTTPPMGWLAW | Negative |
| P17050 | LLLGHVAQVLMLDNGLLQTP  | Negative |
| P17050 | MGWLAWERFRCNINCDEDPK  | Negative |
| P17050 | NGLLQTTPPMGWLAWERFCN  | Negative |
| P17050 | MLDNGLLQTTPPMGWLAWERF | Negative |
| P17050 | LQTPPMGWLAWERFRCNINC  | Negative |
| P17050 | VLLLGHVAQVLMLDNGLLQT  | Negative |
| P17050 | LMLDNGLLQTTPPMGWLAWER | Negative |
| P17050 | LLGHVAQVLMLDNGLLQTPP  | Negative |
| P17050 | GWLAWERFRCNINCDEDPKN  | Negative |
| P17050 | LLKTVLLLGHVAQVLMLDNG  | Negative |
| P17050 | VLMLDNGLLQTTPPMGWLAW  | Negative |
| P17050 | AQVLMLDNGLLQTTPPMGWL  | Negative |
| P17050 | PMGWLAWERFRCNINCDEDP  | Negative |
| P17164 | SAQAGGLAPHHYTPDWPSLD  | Negative |
| P17164 | LLLLLAASAQAGGLAPHHYT  | Negative |
| P17164 | AVGFGLLLLLLAASAQAGGLA | Negative |
| P17164 | EWAVGFGLLLLLLAASAQAG  | Negative |
| P17164 | ASAQAGGLAPHHYTPDWPSL  | Negative |
| P17164 | AQAGGLAPHHYTPDWPSLDS  | Negative |
| P17164 | KSEWWAVGFGLLLLLLAASAQ | Negative |
| P17164 | FGLLLLLLAASAQAGGLAPHH | Negative |
| P17164 | AGGLAPHHYTPDWPSLDSRP  | Negative |
| P17164 | VGFGLLLLLAASAQAGGLAP  | Negative |
| P17164 | WAVGFGLLLLLLAASAQAGGL | Negative |
| P17164 | LKSEWWAVGFGLLLLLLAASA | Negative |
| P17164 | APHHYTPDWPSLDSRPLPRW  | Negative |
| P17164 | AASAQAGGLAPHHYTPDWPS  | Negative |
| P17164 | LAASAQAGGLAPHHYTPDWP  | Negative |
| P17164 | SEWWAVGFGLLLLLLAASAQA | Negative |
| P17164 | GGLAPHHYTPDWPSLDSRPL  | Negative |
| P17164 | LLAASAQAGGLAPHHYTPDW  | Negative |
| P17164 | LLLAASAQAGGLAPHHYTPD  | Negative |
| P17164 | LLLLAASAQAGGLAPHHYTP  | Negative |
| P17164 | PHHYTPDWPSLDSRPLPRWF  | Negative |
| P17164 | DLKSEWWAVGFGLLLLLLAAS | Negative |
| P17164 | MWDLKSEWWAVGFGLLLLLLA | Negative |
| P17164 | QAGGLAPHHYTPDWPSLDSR  | Negative |
| P17164 | WDLKSEWWAVGFGLLLLLLAA | Negative |
| P17164 | GFGLLLLLLAASAQAGGLAPH | Negative |
| P17164 | WWAVGFGLLLLLLAASAQAGG | Negative |
| P17164 | GLAPHHYTPDWPSLDSRPLP  | Negative |
| P17164 | LAPHHYTPDWPSLDSRPLPR  | Negative |
| P17213 | APRWASLMVLVAIGTAVTAA  | Negative |
| P17213 | CNAPRWASLMVLVAIGTAVT  | Negative |
| P17213 | GPCNAPRWASLMVLVAIGTA  | Negative |

|        |                      |          |
|--------|----------------------|----------|
| P17213 | WASLMVLVAIGTAVTAAVNP | Negative |
| P17213 | MARGPCNAPRWASLMVLVAI | Negative |
| P17213 | TAAVNPGVVVRISQKGLDYA | Negative |
| P17213 | RGPCNAPRWASLMVLVAIGT | Negative |
| P17213 | MRENMARGPCNAPRWASLMV | Negative |
| P17213 | TAVTAAVNPGVVVRISQKGL | Negative |
| P17213 | IGTAVTAAVNPGVVVRISQK | Negative |
| P17213 | VLVAIGTAVTAAVNPGVVVR | Negative |
| P17213 | AVTAAVNPGVVVRISQKGLD | Negative |
| P17213 | MVLVAIGTAVTAAVNPGVVV | Negative |
| P17213 | PRWASLMVLVAIGTAVTAAV | Negative |
| P17213 | VTAAVNPGVVVRISQKGLDY | Negative |
| P17213 | ENMARGPCNAPRWASLMVLV | Negative |
| P17213 | LVAIGTAVTAAVNPGVVVRI | Negative |
| P17213 | ARGPCNAPRWASLMVLVAIG | Negative |
| P17213 | LMVLVAIGTAVTAAVNPGVV | Negative |
| P17213 | NMARGPCNAPRWASLMVLVA | Negative |
| P17213 | VAIGTAVTAAVNPGVVVRIS | Negative |
| P17213 | AIGTAVTAAVNPGVVVRISQ | Negative |
| P17213 | RENMARGPCNAPRWASLMVL | Negative |
| P17213 | NAPRWASLMVLVAIGTAVTA | Negative |
| P17213 | GTAVTAAVNPGVVVRISQKG | Negative |
| P17213 | RWASLMVLVAIGTAVTAAVN | Negative |
| P17213 | AAVNPGVVVRISQKGLDYAS | Negative |
| P17213 | PCNAPRWASLMVLVAIGTAV | Negative |
| P17213 | ASLMVLVAIGTAVTAAVNPG | Negative |
| P17259 | PALADITVYNGQHKEAAQAV | Negative |
| P17259 | QHKEAAQAVADAFTRATGIK | Negative |
| P17259 | VYNGQHKEAAQAVADAFTRA | Negative |
| P17259 | AALTAATPALADITVYNGQH | Negative |
| P17259 | LLAAALTAATPALADITVYN | Negative |
| P17259 | TSIRYALLAAALTAATPALA | Negative |
| P17259 | GQHKEAAQAVADAFTRATGI | Negative |
| P17259 | TVYNGQHKEAAQAVADAFTR | Negative |
| P17259 | ADITVYNGQHKEAAQAVADA | Negative |
| P17259 | SIRYALLAAALTAATPALAD | Negative |
| P17259 | YNGQHKEAAQAVADAFTRAT | Negative |
| P17259 | TPALADITVYNGQHKEAAQA | Negative |
| P17259 | ALADITVYNGQHKEAAQAVA | Negative |
| P17259 | ATPALADITVYNGQHKEAAQ | Negative |
| P17259 | LTAATPALADITVYNGQHKE | Negative |
| P17259 | ALTAATPALADITVYNGQHK | Negative |
| P17259 | LAAALTAATPALADITVYNG | Negative |
| P17259 | AATPALADITVYNGQHKEAA | Negative |
| P17259 | IRYALLAAALTAATPALADI | Negative |
| P17259 | LADITVYNGQHKEAAQAVAD | Negative |

|        |                       |          |
|--------|-----------------------|----------|
| P17259 | MKTSIRYALLAAALTAATPA  | Negative |
| P17259 | AAALTAATPALADITVYNGQ  | Negative |
| P17259 | TAATPALADITVYNGQHKEA  | Negative |
| P17259 | YALLAAALTAATPALADITV  | Negative |
| P17259 | DITVYNGQHKEAAQAVADAF  | Negative |
| P17259 | RYALLAAALTAATPALADIT  | Negative |
| P17259 | NGQHKEAAQAVADAFTRATG  | Negative |
| P17259 | KTSIRYALLAAALTAATPAL  | Negative |
| P17259 | ITVYNGQHKEAAQAVADAFT  | Negative |
| P17314 | SGSCVPGVAFRTNLLPHCRD  | Negative |
| P17314 | VLLSVLAAASASGSCVPGVA  | Negative |
| P17314 | VLAAASASGSCVPGVAFRTN  | Negative |
| P17314 | LLLLAAVLLSVLAAASASGS  | Negative |
| P17314 | SSCSLLLLAAVLLSVLAAAS  | Negative |
| P17314 | SVLAAASASGSCVPGVAFRT  | Negative |
| P17314 | AASASGSCVPGVAFRTNLLP  | Negative |
| P17314 | LAAASASGSCVPGVAFRTNL  | Negative |
| P17314 | ASGSCVPGVAFRTNLLPHCR  | Negative |
| P17314 | LAASVLLSVLAAASASGSCVP | Negative |
| P17314 | ACKSSCSLLLLAAVLLSVLA  | Negative |
| P17314 | ASASGSCVPGVAFRTNLLPH  | Negative |
| P17314 | KSSCSLLLLAAVLLSVLAAA  | Negative |
| P17314 | CKSSCSLLLLAAVLLSVLAA  | Negative |
| P17314 | LSVLAAASASGSCVPGVAFR  | Negative |
| P17314 | GSCVPGVAFRTNLLPHCRDY  | Negative |
| P17314 | LLAAVLLSVLAAASASGSC   | Negative |
| P17314 | AVLLSVLAAASASGSCVPGV  | Negative |
| P17314 | CVPGVAFRTNLLPHCRDYVL  | Negative |
| P17314 | SCSLLLLAAVLLSVLAAASA  | Negative |
| P17314 | SCVPGVAFRTNLLPHCRDYV  | Negative |
| P17314 | SASGSCVPGVAFRTNLLPHC  | Negative |
| P17314 | VPVAFRTNLLPHCRDYVLQ   | Negative |
| P17314 | CSLLLLAAVLLSVLAAASAS  | Negative |
| P17314 | AAVLLSVLAAASASGSCVPG  | Negative |
| P17314 | SLLLLAAVLLSVLAAASASG  | Negative |
| P17314 | LLSVLAAASASGSCVPGVAF  | Negative |
| P17314 | AAASASGSCVPGVAFRTNLL  | Negative |
| P17314 | MACKSSCSLLLLAAVLLSVL  | Negative |
| P17315 | RLNPFVRVGLCLSAISCAWP  | Negative |
| P17315 | VDDDGETMVVTASSVEQNLK  | Negative |
| P17315 | SCAWPVLA VDDDGETMVVTA | Negative |
| P17315 | LSAISCAWPVLA VDDDGETM | Negative |
| P17315 | PFVRVGLCLSAISCAWPVLA  | Negative |
| P17315 | VLA VDDDGETMVVTASSVEQ | Negative |
| P17315 | LNPFVRVGLCLSAISCAWPV  | Negative |
| P17315 | MFRLNPFVRVGLCLSAISCA  | Negative |

|        |                        |          |
|--------|------------------------|----------|
| P17315 | NPFVRVGLCLSAISCAWPVL   | Negative |
| P17315 | FVRVGLCLSAISCAWPVLAV   | Negative |
| P17315 | CLSAISCAWPVLAVDDDGET   | Negative |
| P17315 | SAISCAWPVLAVDDDGETMV   | Negative |
| P17315 | VRVGLCLSAISCAWPVLAVD   | Negative |
| P17315 | AVDDDGETMVVTASSVEQNL   | Negative |
| P17315 | DDGETMVVTASSVEQNLKDA   | Negative |
| P17315 | ISCAWPVLAVDDDGETMVVT   | Negative |
| P17315 | LAVDDDGETMVVTASSVEQN   | Negative |
| P17315 | RVGLCLSAISCAWPVLAVDD   | Negative |
| P17315 | VGLCLSAISCAWPVLAVDDD   | Negative |
| P17315 | FRLNPFVRVGLCLSAISCAW   | Negative |
| P17315 | AWPVLAVDDDGETMVVTASS   | Negative |
| P17315 | PVLAVDDDGETMVVTASSVE   | Negative |
| P17315 | DGETMVVTASSVEQNLKDAP   | Negative |
| P17315 | AISCAWPVLAVDDDGETMVV   | Negative |
| P17315 | CAWPVLAVDDDGETMVVTAS   | Negative |
| P17315 | LCLSAISCAWPVLAVDDDGE   | Negative |
| P17315 | DDDGETMVVTASSVEQNLKD   | Negative |
| P17315 | WPVLAVDDDGETMVVTASSV   | Negative |
| P17315 | GETMVVTASSVEQNLKDAPA   | Negative |
| P17454 | SLLLAAAPGALGTNPGLITR   | Negative |
| P17454 | GSTLLSLLLAAAPGALGNP    | Negative |
| P17454 | MGTWARALLGSTLLSLLLAA   | Negative |
| P17454 | ARALLGSTLLSLLLAAAPGA   | Negative |
| P17454 | LGTNPGLITRITDKGLE YAA  | Negative |
| P17454 | AAPGALGTNPGLITRITDKG   | Negative |
| P17454 | LGSTLLSLLLAAAPGALGTN   | Negative |
| P17454 | GTWARALLGSTLLSLLLAAA   | Negative |
| P17454 | PGALGTNPGLITRITDKGLE   | Negative |
| P17454 | LSLLLAAAPGALGTNPGLIT   | Negative |
| P17454 | LLAAAPGALGTNPGLITRIT   | Negative |
| P17454 | GALGTNPGLITRITDKGLE Y  | Negative |
| P17454 | APGALGTNPGLITRITDKGL   | Negative |
| P17454 | LAAAPGALGTNPGLITRITD   | Negative |
| P17454 | TNPGLITRITDKGLE YAAARE | Negative |
| P17454 | ALGTNPGLITRITDKGLE YA  | Negative |
| P17454 | TWARALLGSTLLSLLLAAAP   | Negative |
| P17454 | LLGSTLLSLLLAAAPGALGT   | Negative |
| P17454 | WARALLGSTLLSLLLAAAPG   | Negative |
| P17454 | LLSLLLAAAPGALGTNPGLI   | Negative |
| P17454 | RALLGSTLLSLLLAAAPGAL   | Negative |
| P17454 | STLLSLLLAAAPGALGTNPG   | Negative |
| P17454 | ALLGSTLLSLLLAAAPGALG   | Negative |
| P17454 | PGLITRITDKGLE YAAAREGL | Negative |
| P17454 | LLLAAAPGALGTNPGLITRI   | Negative |

|        |                      |          |
|--------|----------------------|----------|
| P17454 | GLITRITDKGLEYAAREGLL | Negative |
| P17454 | GTNPGLITRITDKGLEYAAR | Negative |
| P17454 | NPGLITRITDKGLEYAAREG | Negative |
| P17454 | AAAPGALGTNPGLITRITDK | Negative |
| P17475 | LLAALCCLAPSFLAEDAQET | Negative |
| P17475 | PSFLAEDAQETDTSQQDQSP | Negative |
| P17475 | RGLLLLAALCCLAPSFLAED | Negative |
| P17475 | CLAPSFLAEDAQETDTSQQD | Negative |
| P17475 | LAEDAQETDTSQQDQSPTYR | Negative |
| P17475 | LCCLAPSFLAEDAQETDTSQ | Negative |
| P17475 | FLAEDAQETDTSQQDQSPTY | Negative |
| P17475 | DAQETDTSQQDQSPTYRKIS | Negative |
| P17475 | AALCCLAPSFLAEDAQETDT | Negative |
| P17475 | TDTSQQDQSPTYRKISSNLA | Negative |
| P17475 | AQETDTSQQDQSPTYRKISS | Negative |
| P17475 | GLLLLAALCCLAPSFLAEDA | Negative |
| P17475 | SRGLLLLAALCCLAPSFLAE | Negative |
| P17475 | PSISRGLLLLAALCCLAPSF | Negative |
| P17475 | AEDAQETDTSQQDQSPTYRK | Negative |
| P17475 | LAPSFLAEDAQETDTSQQDQ | Negative |
| P17475 | MAPSISRGLLLLAALCCLAP | Negative |
| P17475 | SISRGLLLLAALCCLAPSFL | Negative |
| P17475 | ISRGLLLLAALCCLAPSFLA | Negative |
| P17475 | LLLLAALCCLAPSFLAEDAQ | Negative |
| P17475 | CCLAPSFLAEDAQETDTSQQ | Negative |
| P17475 | SFLAEDAQETDTSQQDQSPT | Negative |
| P17475 | LAALCCLAPSFLAEDAQETD | Negative |
| P17475 | APSISRGLLLLAALCCLAPS | Negative |
| P17475 | QETDTSQQDQSPTYRKISSN | Negative |
| P17475 | ALCCLAPSFLAEDAQETDTS | Negative |
| P17475 | APSFLAEDAQETDTSQQDQS | Negative |
| P17475 | ETDTSQQDQSPTYRKISSNL | Negative |
| P17475 | EDAQETDTSQQDQSPTYRKI | Negative |
| P17572 | TKEGVTSLPICSSGSVNCQV | Negative |
| P17572 | NMLLTKEGVTSLPICSSGSV | Negative |
| P17572 | SLKGLLLAVLLVSNMLLTKE | Negative |
| P17572 | MSNTGASLKGLLLAVLLVSN | Negative |
| P17572 | VLLVSNMLLTKEGVTSLPIC | Negative |
| P17572 | GLLAVLLVSNMLLTKEGV   | Negative |
| P17572 | MLLTKEGVTSLPICSSGSVN | Negative |
| P17572 | LTKEGVTSLPICSSGSVNCQ | Negative |
| P17572 | ASLKGLLLAVLLVSNMLLT  | Negative |
| P17572 | AVLLVSNMLLTKEGVTSLP  | Negative |
| P17572 | LAVLLVSNMLLTKEGVTSLP | Negative |
| P17572 | TGASLKGLLLAVLLVSNMLL | Negative |
| P17572 | LLTKEGVTSLPICSSGSVNC | Negative |



|        |                      |          |
|--------|----------------------|----------|
| P17572 | VTSLPICSSGSVNCQVSLGE | Negative |
| P17572 | VSNMLLTKEGVTSLPICSSG | Negative |
| P17572 | EGVTSLPICSSGSVNCQVSL | Negative |
| P17572 | NTGASLKGLLLAVLLVSNML | Negative |
| P17572 | SNMLLTKEGVTSLPICSSGS | Negative |
| P17572 | LLAVLLVSNMLLTKEGVTSL | Negative |
| P17572 | GVTSLPICSSGSVNCQVSLG | Negative |
| P17572 | KEGVTSLPICSSGSVNCQVS | Negative |
| P17572 | LKGLLLAVLLVSNMLLTKEG | Negative |
| P17572 | SLPICSSGSVNCQVSLGELF | Negative |
| P17572 | LVSNMLLTKEGVTSLPICSS | Negative |
| P17572 | SNTGASLKGLLLAVLLVSNM | Negative |
| P17572 | LLAVLLVSNMLLTKEGVTS  | Negative |
| P17572 | KGLLLAVLLVSNMLLTKEGV | Negative |
| P17572 | TSLPICSSGSVNCQVSLGEL | Negative |
| P17572 | GASLKGLLLAVLLVSNMLLT | Negative |
| P17690 | LGFLCHVAIAGRTPCPDEL  | Negative |
| P17690 | PKPDELPFSTVVPLKRTYEP | Negative |
| P17690 | PALVLLLGFLCHVAIAGRTC | Negative |
| P17690 | MPPPALVLLLGFLCHVAIAG | Negative |
| P17690 | GFLCHVAIAGRTPCPDELP  | Negative |
| P17690 | RTCPKPDELPFSTVVPLKRT | Negative |
| P17690 | LLGFLCHVAIAGRTPCPKD  | Negative |
| P17690 | LVLLLGFLCHVAIAGRTPCK | Negative |
| P17690 | LCHVAIAGRTPCPDELDFS  | Negative |
| P17690 | VLLLGFLCHVAIAGRTPCKP | Negative |
| P17690 | LPFSTVVPLKRTYEPGEQIV | Negative |
| P17690 | LLGFLCHVAIAGRTPCPDE  | Negative |
| P17690 | TCPKPDELPFSTVVPLKRTY | Negative |
| P17690 | AGRTPCPDELPFSTVVPLK  | Negative |
| P17690 | VAIAGRTPCPDELPFSTVV  | Negative |
| P17690 | ELPFSTVVPLKRTYEPGEQI | Negative |
| P17690 | PPALVLLLGFLCHVAIAGRT | Negative |
| P17690 | AIAGRTPCPDELPFSTVVP  | Negative |
| P17690 | KPDELPFSTVVPLKRTYEPG | Negative |
| P17690 | GRTCPKPDELPFSTVVPLKR | Negative |
| P17690 | CPKPDELPFSTVVPLKRTYE | Negative |
| P17690 | CHVAIAGRTPCPDELDFST  | Negative |
| P17690 | DELPFSTVVPLKRTYEPGEQ | Negative |
| P17690 | PDELPFSTVVPLKRTYEPGE | Negative |
| P17690 | FLCHVAIAGRTPCPDELDF  | Negative |
| P17690 | HVAIAGRTPCPDELDFSTV  | Negative |
| P17690 | PPPALVLLLGFLCHVAIAGR | Negative |
| P17690 | IAGRTPCPDELPFSTVVPL  | Negative |
| P17690 | PFSTVVPLKRTYEPGEQIVF | Negative |
| P17692 | AQAAPDTSVSNKQNFSTDVI | Negative |

|        |                      |          |
|--------|----------------------|----------|
| P17692 | TAAFSLGLSLAFGLFSPAQA | Negative |
| P17692 | SPAQAAPDTSVSNKQNFSTD | Negative |
| P17692 | APDTSVSNKQNFSTDVIYQI | Negative |
| P17692 | SLAFGLFSPAQAAPDTSVSN | Negative |
| P17692 | MKKFLKMTAAFSLGLSLAFG | Negative |
| P17692 | FLKMTAAFSLGLSLAFGLFS | Negative |
| P17692 | AFSLGLSLAFGLFSPAQAAP | Negative |
| P17692 | LKMTAAFSLGLSLAFGLFSP | Negative |
| P17692 | AAFSLGLSLAFGLFSPAQAA | Negative |
| P17692 | FGLFSPAQAAPDTSVSNKQN | Negative |
| P17692 | LAFGLFSPAQAAPDTSVSNK | Negative |
| P17692 | KKFLKMTAAFSLGLSLAFGL | Negative |
| P17692 | FSPAQAAPDTSVSNKQNFST | Negative |
| P17692 | LSLAFGLFSPAQAAPDTSVS | Negative |
| P17692 | AAPDTSVSNKQNFSTDVIYQ | Negative |
| P17692 | QAAPDTSVSNKQNFSTDVIY | Negative |
| P17692 | KFLKMTAAFSLGLSLAFGLF | Negative |
| P17692 | GLFSPAQAAPDTSVSNKQNF | Negative |
| P17692 | KMTAAFSLGLSLAFGLFSPA | Negative |
| P17692 | LFSPAQAAPDTSVSNKQNF  | Negative |
| P17692 | DTSVSNKQNFSTDVIYQIFT | Negative |
| P17692 | PAQAAPDTSVSNKQNFSTDV | Negative |
| P17692 | GLSLAFGLFSPAQAAPDTSV | Negative |
| P17692 | PDTSVSNKQNFSTDVIYQIF | Negative |
| P17692 | FSLGLSLAFGLFSPAQAAPD | Negative |
| P17692 | MTAAFSLGLSLAFGLFSPAQ | Negative |
| P17692 | AFGLFSPAQAAPDTSVSNKQ | Negative |
| P17692 | SLGLSLAFGLFSPAQAAPDT | Negative |
| P17697 | LLSWESGWAISDKELQEMST | Negative |
| P17697 | TLLLLMGLLLSWESGWAISD | Negative |
| P17697 | EMSTEGSKYVNKEIKNALKE | Negative |
| P17697 | WAISDKELQEMSTEGSKYVN | Negative |
| P17697 | SWESGWAISDKELQEMSTEG | Negative |
| P17697 | LSWESGWAISDKELQEMSTE | Negative |
| P17697 | LLSWESGWAISDKELQEMS  | Negative |
| P17697 | KELQEMSTEGSKYVNKEIKN | Negative |
| P17697 | KTLLLLMGLLLSWESGWAIS | Negative |
| P17697 | WESGWAISDKELQEMSTEGS | Negative |
| P17697 | ESGWAISDKELQEMSTEGSK | Negative |
| P17697 | GWAISDKELQEMSTEGSKYV | Negative |
| P17697 | DKELQEMSTEGSKYVNKEIK | Negative |
| P17697 | MKTLLLLMGLLLSWESGWAI | Negative |
| P17697 | LMGLLLSWESGWAISDKELQ | Negative |
| P17697 | STEGSKYVNKEIKNALKEVK | Negative |
| P17697 | ISDKELQEMSTEGSKYVNKE | Negative |
| P17697 | TEGSKYVNKEIKNALKEVKQ | Negative |

|        |                       |          |
|--------|-----------------------|----------|
| P17697 | LQEMSTEGSKYVNKEIKNAL  | Negative |
| P17697 | MGLLLSWESGWAISDKELQE  | Negative |
| P17697 | ELQEMSTEGSKYVNKEIKNA  | Negative |
| P17697 | SGWAISDKELQEMSTEGSKY  | Negative |
| P17697 | LLLLMGLLLSWESGWAISDK  | Negative |
| P17697 | AISDKELQEMSTEGSKYVNK  | Negative |
| P17697 | SDKELQEMSTEGSKYVNKEI  | Negative |
| P17697 | MSTEGSKYVNKEIKNALKEV  | Negative |
| P17697 | QEMSTEGSKYVNKEIKNALK  | Negative |
| P17697 | LLMGLLLSWESGWAISDKEL  | Negative |
| P17697 | GLLSWESGWAISDKELQEM   | Negative |
| P17715 | APWMHLLTVLALLALWGPNS  | Negative |
| P17715 | LWGPNSVQAYSSQHLCGSNL  | Negative |
| P17715 | HLLTVLALLALWGPNSVQAY  | Negative |
| P17715 | HLCGSNLVEALYMTCSRSGF  | Negative |
| P17715 | SVQAYSSQHLCGSNLVEALY  | Negative |
| P17715 | LALLALWGPNSVQAYSSQHL  | Negative |
| P17715 | QAYSSQHLCGSNLVEALYMT  | Negative |
| P17715 | YSSQHLCGSNLVEALYMTCG  | Negative |
| P17715 | LTVLALLALWGPNSVQAYSS  | Negative |
| P17715 | TVLALLALWGPNSVQAYSSQ  | Negative |
| P17715 | MAPWMHLLTVLALLALWGPNS | Negative |
| P17715 | NSVQAYSSQHLCGSNLVEAL  | Negative |
| P17715 | ALLALWGPNSVQAYSSQHLC  | Negative |
| P17715 | LALWGPNSVQAYSSQHLCGS  | Negative |
| P17715 | PNSVQAYSSQHLCGSNLVEA  | Negative |
| P17715 | LCGSNLVEALYMTCSRSGFY  | Negative |
| P17715 | AYSSQHLCGSNLVEALYMT   | Negative |
| P17715 | SSQHLCGSNLVEALYMTCSR  | Negative |
| P17715 | VQAYSSQHLCGSNLVEALY   | Negative |
| P17715 | SQHLCGSNLVEALYMTCSR   | Negative |
| P17715 | PWMHLLTVLALLALWGPNSV  | Negative |
| P17715 | ALWGPNSVQAYSSQHLCGSN  | Negative |
| P17715 | LLTVLALLALWGPNSVQAYS  | Negative |
| P17715 | MHLLTVLALLALWGPNSVQA  | Negative |
| P17715 | GPNSVQAYSSQHLCGSNLVE  | Negative |
| P17715 | WGPNSVQAYSSQHLCGSNLV  | Negative |
| P17715 | WMHLLTVLALLALWGPNSVQ  | Negative |
| P17715 | QHLCGSNLVEALYMTCSRSG  | Negative |
| P17715 | LLALWGPNSVQAYSSQHLCG  | Negative |
| P17728 | IAKNYNCVYECFRDAYCNEL  | Negative |
| P17728 | MISLALLLLLGVESVRDAYI  | Negative |
| P17728 | DAYIAKNYNCVYECFRDAYC  | Negative |
| P17728 | LGVESVRDAYIAKNYNCVYE  | Negative |
| P17728 | NYNCVYECFRDAYCNELCTK  | Negative |
| P17728 | LLGVESVRDAYIAKNYNCVY  | Negative |

|        |                       |          |
|--------|-----------------------|----------|
| P17728 | ESVRDAYIAKNYNCVYECFR  | Negative |
| P17728 | LLLLGVESVRDAYIAKNYNC  | Negative |
| P17728 | NHLMISLALLLLLGVESVR   | Negative |
| P17728 | LLLLLGVESVRDAYIAKNYN  | Negative |
| P17728 | RDAYIAKNYNCVYECFRDAY  | Negative |
| P17728 | SVRDAYIAKNYNCVYECFRD  | Negative |
| P17728 | ALLLLLGVESVRDAYIAKNY  | Negative |
| P17728 | ISLALLLLLGVESVRDAYIA  | Negative |
| P17728 | HLVMISLALLLLLGVESVRD  | Negative |
| P17728 | GVESVRDAYIAKNYNCVYEC  | Negative |
| P17728 | LVMISLALLLLLGVESVRDA  | Negative |
| P17728 | AKNYNCVYECFRDAYCNELC  | Negative |
| P17728 | SLALLLLLGVESVRDAYIAK  | Negative |
| P17728 | AYIAKNYNCVYECFRDAYCN  | Negative |
| P17728 | VESVRDAYIAKNYNCVYECF  | Negative |
| P17728 | LALLLLLGVESVRDAYIAKN  | Negative |
| P17728 | MNHLVMISLALLLLLGVESV  | Negative |
| P17728 | YNCVYECFRDAYCNELECTKN | Negative |
| P17728 | VRDAYIAKNYNCVYECFRDA  | Negative |
| P17728 | KNYNCVYECFRDAYCNELECT | Negative |
| P17728 | LLLGVESVRDAYIAKNYNCV  | Negative |
| P17728 | NCVYECFRDAYCNELECTKNG | Negative |
| P17728 | YIAKNYNCVYECFRDAYCNE  | Negative |
| P17901 | NAYDASLIPNLQIPQKNIPN  | Negative |
| P17901 | MKKTAFLLCFLMIFTALLP   | Negative |
| P17901 | FTALLPMQNANAYDASLIPN  | Negative |
| P17901 | LLPMQNANAYDASLIPNLQI  | Negative |
| P17901 | NANAYDASLIPNLQIPQKNI  | Negative |
| P17901 | TALLPMQNANAYDASLIPNL  | Negative |
| P17901 | ASLIPNLQIPQKNIPNNDGM  | Negative |
| P17901 | DASLIPNLQIPQKNIPNNDG  | Negative |
| P17901 | SLIPNLQIPQKNIPNNDGMN  | Negative |
| P17901 | AFLLCFLMIFTALLPMQNaN  | Negative |
| P17901 | QNANAYDASLIPNLQIPQKN  | Negative |
| P17901 | TAFLLCFLMIFTALLPMQNA  | Negative |
| P17901 | MQNANAYDASLIPNLQIPQK  | Negative |
| P17901 | IFTALLPMQNANAYDASLIP  | Negative |
| P17901 | TTAFLLCFLMIFTALLPMQN  | Negative |
| P17901 | LCFLMIFTALLPMQNANAYD  | Negative |
| P17901 | CFLMIFTALLPMQNANAYDA  | Negative |
| P17901 | ANAYDASLIPNLQIPQKNIP  | Negative |
| P17901 | AYDASLIPNLQIPQKNIPNN  | Negative |
| P17901 | MIFTALLPMQNANAYDASLI  | Negative |
| P17901 | KKTTAFLLCFLMIFTALLPM  | Negative |
| P17901 | YDASLIPNLQIPQKNIPNND  | Negative |
| P17901 | LPMQNANAYDASLIPNLQIP  | Negative |

|        |                      |          |
|--------|----------------------|----------|
| P17901 | PMQNANAYDASLIPNLQIPQ | Negative |
| P17901 | FLMIFTALLPMQNANAYDAS | Negative |
| P17901 | FLLCFLMIFTALLPMQNANA | Negative |
| P17901 | ALLPMQNANAYDASLIPNLQ | Negative |
| P17901 | LLCFLMIFTALLPMQNANAY | Negative |
| P17901 | KTTAFLLCFLMIFTALLPMQ | Negative |
| P17935 | VAVCLIGVEGSVIEFGKMIQ | Negative |
| P17935 | VIEFGKMIQEETDKNPLTSY | Negative |
| P17935 | TDKNPLTSYSFYGCHCGLGN | Negative |
| P17935 | KMIQEETDKNPLTSYSFYGC | Negative |
| P17935 | ETDKNPLTSYSFYGCHCGLG | Negative |
| P17935 | FGKMIQEETDKNPLTSYSFY | Negative |
| P17935 | AVCLIGVEGSVIEFGKMIQE | Negative |
| P17935 | SVIEFGKMIQEETDKNPLTS | Negative |
| P17935 | WIVAVCLIGVEGSVIEFGKM | Negative |
| P17935 | IGVEGSVIEFGKMIQEETDK | Negative |
| P17935 | EFGKMIQEETDKNPLTSYSF | Negative |
| P17935 | GSVIEFGKMIQEETDKNPLT | Negative |
| P17935 | IEFGKMIQEETDKNPLTSYS | Negative |
| P17935 | IQEETDKNPLTSYSFYGCHC | Negative |
| P17935 | QEETDKNPLTSYSFYGCHCG | Negative |
| P17935 | GKMIQEETDKNPLTSYSFYG | Negative |
| P17935 | EGSVIEFGKMIQEETDKNPL | Negative |
| P17935 | VCLIGVEGSVIEFGKMIQEE | Negative |
| P17935 | ILWIVAVCLIGVEGSVIEFG | Negative |
| P17935 | LIGVEGSVIEFGKMIQEETD | Negative |
| P17935 | MIQEETDKNPLTSYSFYGCH | Negative |
| P17935 | VEGSVIEFGKMIQEETDKNP | Negative |
| P17935 | LWIVAVCLIGVEGSVIEFGK | Negative |
| P17935 | DKNPLTSYSFYGCHCGLGNK | Negative |
| P17935 | GVEGSVIEFGKMIQEETDKN | Negative |
| P17935 | CLIGVEGSVIEFGKMIQEET | Negative |
| P17935 | IVAVCLIGVEGSVIEFGKMI | Negative |
| P17935 | EETDKNPLTSYSFYGCHCGL | Negative |
| P17935 | MRILWIVAVCLIGVEGSVIE | Negative |
| P17936 | GASSAGLGPVVRCEPCDARA | Negative |
| P17936 | PTLWAAALTLVLLRGPPVA  | Negative |
| P17936 | PPVARAGASSAGLGPVVRCE | Negative |
| P17936 | GPPVARAGASSAGLGPVVR  | Negative |
| P17936 | LLRGPPVARAGASSAGLGPV | Negative |
| P17936 | RPTLWAAALTLVLLRGPPV  | Negative |
| P17936 | ASSAGLGPVVRCEPCDARAL | Negative |
| P17936 | TLLVLLRGPPVARAGASSAG | Negative |
| P17936 | LRGPPVARAGASSAGLGPVV | Negative |
| P17936 | VLLRGPPVARAGASSAGLGP | Negative |
| P17936 | LWAAALTLVLLRGPPVARA  | Negative |

|        |                       |          |
|--------|-----------------------|----------|
| P17936 | LLVLLRGPPVARAGASSAGL  | Negative |
| P17936 | ARAGASSAGLGPVVRCEPCD  | Negative |
| P17936 | QRARPTLWAAALTLLVLLRG  | Negative |
| P17936 | RGPPVARAGASSAGLGPVVR  | Negative |
| P17936 | PVARAGASSAGLGPVVRCEP  | Negative |
| P17936 | RARPTLWAAALTLLVLLRGP  | Negative |
| P17936 | VARAGASSAGLGPVVRCEPC  | Negative |
| P17936 | RAGASSAGLGPVVRCEPCDA  | Negative |
| P17936 | LVLLRGPPVARAGASSAGLG  | Negative |
| P17936 | AGASSAGLGPVVRCEPCDAR  | Negative |
| P17936 | ARPTLWAAALTLLVLLRGPP  | Negative |
| P17936 | SSAGLGPVVRCEPCDARALA  | Negative |
| P17936 | AALTLLVLLRGPPVARAGAS  | Negative |
| P17936 | AAALTLLVLLRGPPVARAGA  | Negative |
| P17936 | MQRARPTLWAAALTLLVLLR  | Negative |
| P17936 | TLWAAALTLLVLLRGPPVAR  | Negative |
| P17936 | ALTLLVLLRGPPVARAGASS  | Negative |
| P17936 | WAAALTLLVLLRGPPVARAG  | Negative |
| P17953 | APILFIGVLGVVGLATDDVQ  | Negative |
| P17953 | QQTEVKKRFRKMYKAKKHWV  | Negative |
| P17953 | KMYKAKKHWVAPILFIGVL   | Negative |
| P17953 | TEVKKRFRKMYKAKKHWVAP  | Negative |
| P17953 | KRFRKMYKAKKHWVAPILFI  | Negative |
| P17953 | MKQQTEVKKRFRKMYKAKKHW | Negative |
| P17953 | MYKAKKHWVAPILFIGVLG   | Negative |
| P17953 | FKMYKAKKHWVAPILFIGV   | Negative |
| P17953 | LFIGVLGVVGLATDDVQAAE  | Negative |
| P17953 | VLGVVGLATDDVQAAELDTQ  | Negative |
| P17953 | KKHWVAPILFIGVLGVVGL   | Negative |
| P17953 | AKKHWVAPILFIGVLGVVG   | Negative |
| P17953 | ILFIGVLGVVGLATDDVQAA  | Negative |
| P17953 | KQQTEVKKRFRKMYKAKKHW  | Negative |
| P17953 | KKRFRKMYKAKKHWVAPILF  | Negative |
| P17953 | PILFIGVLGVVGLATDDVQA  | Negative |
| P17953 | FIGVLGVVGLATDDVQAAEL  | Negative |
| P17953 | HWVAPILFIGVLGVVGLAT   | Negative |
| P17953 | VAPILFIGVLGVVGLATDDV  | Negative |
| P17953 | QTEVKKRFRKMYKAKKHWVVA | Negative |
| P17953 | YKAKKHWVAPILFIGVLGV   | Negative |
| P17953 | VVAPILFIGVLGVVGLATDD  | Negative |
| P17953 | KHWVAPILFIGVLGVVGLA   | Negative |
| P17953 | KAKKHWVAPILFIGVLGVV   | Negative |
| P17953 | RFRKMYKAKKHWVAPILFIG  | Negative |
| P17953 | VKKRFRKMYKAKKHWVAPIL  | Negative |
| P17953 | WVAPILFIGVLGVVGLATD   | Negative |
| P17953 | IGVLGVVGLATDDVQAAELD  | Negative |

|        |                       |          |
|--------|-----------------------|----------|
| P17953 | EVKKRFRKMYKAKKHWVAPI  | Negative |
| P17989 | MNIKKTAVKSALAVAAAAAA  | Negative |
| P17989 | IKKTAVKSALAVAAAAAALT  | Negative |
| P17989 | LTTNVSADKDFSGAELYTLEE | Negative |
| P17989 | KTAVKSALAVAAAAAALTNN  | Negative |
| P17989 | ALTTNVSADKDFSGAELYTLE | Negative |
| P17989 | TNVSADKDFSGAELYTLEEVQ | Negative |
| P17989 | AALTTNVSADKDFSGAELYTL | Negative |
| P17989 | VSAKDFSGAELYTLEEVQYG  | Negative |
| P17989 | KSALAVAAAAAALTNNVSAK  | Negative |
| P17989 | SAKDFSGAELYTLEEVQYGK  | Negative |
| P17989 | TAVKSALAVAAAAAALTNNV  | Negative |
| P17989 | ALAVAAAAAALTNNVSAKDF  | Negative |
| P17989 | AAAAAALTNNVSAKDFSGAE  | Negative |
| P17989 | AAAAALTNNVSAKDFSGAEL  | Negative |
| P17989 | KKTAVKSALAVAAAAAALT   | Negative |
| P17989 | TTNVSADKDFSGAELYTLEEV | Negative |
| P17989 | SALAVAAAAAALTNNVSAKD  | Negative |
| P17989 | AVKSALAVAAAAAALTNNVS  | Negative |
| P17989 | FSGAELYTLEEVQYGKFEAR  | Negative |
| P17989 | KDFSGAELYTLEEVQYGKFE  | Negative |
| P17989 | VKSALAVAAAAAALTNNVSA  | Negative |
| P17989 | NVSAKDFSGAELYTLEEVQY  | Negative |
| P17989 | NIKKTAVKSALAVAAAAAAL  | Negative |
| P17989 | AAAALTNNVSAKDFSGAELY  | Negative |
| P17989 | AKDFSGAELYTLEEVQYGKF  | Negative |
| P17989 | VAAAAAALTNNVSAKDFSGA  | Negative |
| P17989 | LAVAAAAAALTNNVSAKDFS  | Negative |
| P17989 | DFSGAELYTLEEVQYGKFEA  | Negative |
| P17989 | AAALTNNVSAKDFSGAELYT  | Negative |
| P18126 | GWVRPLMLGCGLLGAALSAG  | Negative |
| P18126 | LSGWVRPLMLGCGLLGAALS  | Negative |
| P18126 | AGSIQAAVCEYRVTNEWGSG  | Negative |
| P18126 | VRPLMLGCGLLGAALSAGSI  | Negative |
| P18126 | RPLMLGCGLLGAALSAGSIQ  | Negative |
| P18126 | SGWVRPLMLGCGLLGAALSA  | Negative |
| P18126 | LGAALSAGSIQAAVCEYRVT  | Negative |
| P18126 | LLGAALSAGSIQAAVCEYRV  | Negative |
| P18126 | QAAVCEYRVTNEWGSGFTAS  | Negative |
| P18126 | GSIQAAVCEYRVTNEWGSGF  | Negative |
| P18126 | SIQAAVCEYRVTNEWGSGFT  | Negative |
| P18126 | ALSAGSIQAAVCEYRVTNEW  | Negative |
| P18126 | LGCGLLGAALSAGSIQAAVC  | Negative |
| P18126 | AVCEYRVTNEWGSGFTASIR  | Negative |
| P18126 | GLLGAALSAGSIQAAVCEYR  | Negative |
| P18126 | LSAGSIQAAVCEYRVTNEWG  | Negative |

|        |                      |          |
|--------|----------------------|----------|
| P18126 | LMLGCGLLGAALSAGSIQAA | Negative |
| P18126 | PLMLGCGLLGAALSAGSIQA | Negative |
| P18126 | WVRPLMLGCGLLGAALSAGS | Negative |
| P18126 | SAGSIQAAVCEYRVTNEWGS | Negative |
| P18126 | AAVCEYRVTNEWGSGFTASI | Negative |
| P18126 | LLSGWVRPLMLGCGLLGAAL | Negative |
| P18126 | AALSAGSIQAAVCEYRVTNE | Negative |
| P18126 | NLLSGWVRPLMLGCGLLGAA | Negative |
| P18126 | MNLLSGWVRPLMLGCGLLGA | Negative |
| P18126 | IQAAVCEYRVTNEWGSGFTA | Negative |
| P18126 | GCGLLGAALSAGSIQAAVCE | Negative |
| P18126 | MLGCGLLGAALSAGSIQAAV | Negative |
| P18126 | GAALSAGSIQAAVCEYRVTN | Negative |
| P18137 | SFVSLLVVGILFPAIQAKQF | Negative |
| P18137 | IQAKQFTKCELSQVLKDMDG | Negative |
| P18137 | CELSQVLKDMDGYGDITLPE | Negative |
| P18137 | LLVVGILFPAIQAKQFTKCE | Negative |
| P18137 | VLKDMDGYGDITLPEWICTI | Negative |
| P18137 | LFPAIQAKQFTKCELSQVLK | Negative |
| P18137 | KQFTKCELSQVLKDMDGYGD | Negative |
| P18137 | VVGILFPAIQAKQFTKCELS | Negative |
| P18137 | MMSFVSLLVVGILFPAIQAK | Negative |
| P18137 | PAIQAKQFTKCELSQVLKDM | Negative |
| P18137 | SLLVVGILFPAIQAKQFTKC | Negative |
| P18137 | LSQVLKDMDGYGDITLPEWI | Negative |
| P18137 | AKQFTKCELSQVLKDMDGYG | Negative |
| P18137 | TKCELSQVLKDMDGYGDITL | Negative |
| P18137 | ILFPAIQAKQFTKCELSQVL | Negative |
| P18137 | ELSQVLKDMDGYGDITLPEW | Negative |
| P18137 | SQVLKDMDGYGDITLPEWIC | Negative |
| P18137 | VGILFPAIQAKQFTKCELSQ | Negative |
| P18137 | GILFPAIQAKQFTKCELSQV | Negative |
| P18137 | FPAIQAKQFTKCELSQVLKD | Negative |
| P18137 | FTKCELSQVLKDMDGYGDIT | Negative |
| P18137 | QFTKCELSQVLKDMDGYGDI | Negative |
| P18137 | QVLKDMDGYGDITLPEWICT | Negative |
| P18137 | LVVGILFPAIQAKQFTKCEL | Negative |
| P18137 | MSFVSLLVVGILFPAIQAKQ | Negative |
| P18137 | FVSLLVVGILFPAIQAKQFT | Negative |
| P18137 | AIQAKQFTKCELSQVLKDM  | Negative |
| P18137 | QAKQFTKCELSQVLKDMDGY | Negative |
| P18137 | KCELSQVLKDMDGYGDITLP | Negative |
| P18181 | HSIPDINATTGSNVTLKIHK | Negative |
| P18181 | QGHIPDINATTGSNVTLKI  | Negative |
| P18181 | IKQGWCLVLELLLLPLGTGF | Negative |
| P18181 | LELLLLPLGTGFQGHIPDI  | Negative |



|        |                       |          |
|--------|-----------------------|----------|
| P18181 | CLVLELLLLPLGTGFQGHSI  | Negative |
| P18181 | MCFIKQGWCLVLELLLLPLG  | Negative |
| P18181 | LGTGFQGH SIPDINATTGSN | Negative |
| P18181 | LVLELLLLPLGTGFQGH SIP | Negative |
| P18181 | QGWCLVLELLLLPLGTGFQG  | Negative |
| P18181 | IPDINATTGSNVTLKIHKDP  | Negative |
| P18181 | GTGFQGH SIPDINATTGSNV | Negative |
| P18181 | LPLGTGFQGH SIPDINATTG | Negative |
| P18181 | PDINATTGSNVTLKIHKDPL  | Negative |
| P18181 | DINATTGSNVTLKIHKDPLG  | Negative |
| P18181 | TGFQGH SIPDINATTGSNVT | Negative |
| P18181 | GWCLVLELLLLPLGTGFQGH  | Negative |
| P18181 | LLPLGTGFQGH SIPDINATT | Negative |
| P18181 | CFIKQGWCLVLELLLLPLGT  | Negative |
| P18181 | PLGTGFQGH SIPDINATTGS | Negative |
| P18181 | FIKQGWCLVLELLLLPLGTG  | Negative |
| P18181 | GFQGH SIPDINATTGSNVTL | Negative |
| P18181 | FQGH SIPDINATTGSNVTLK | Negative |
| P18181 | SIPDINATTGSNVTLKIHKD  | Negative |
| P18181 | GHSIPDINATTGSNVTLKIH  | Negative |
| P18181 | LLLLPLGTGFQGH SIPDINA | Negative |
| P18181 | KQGWCLVLELLLLPLGTGFQ  | Negative |
| P18181 | VLELLLLPLGTGFQGH SIPD | Negative |
| P18181 | ELLLLPLGTGFQGH SIPDIN | Negative |
| P18181 | LLLPLGTGFQGH SIPDINAT | Negative |
| P18278 | ASAKRRSLLGILAAGTICAA  | Negative |
| P18278 | TICAAALPYAAV PARADGQG | Negative |
| P18278 | GILAAGTICAAALPYAAVPA  | Negative |
| P18278 | LPYAAV PARADGQGNTGEAI | Negative |
| P18278 | CAAALPYAAV PARADGQGNT | Negative |
| P18278 | RRSLLGILAAGTICAAALPY  | Negative |
| P18278 | ILAAGTICAAALPYAAV PAR | Negative |
| P18278 | AAGTICAAALPYAAV PARAD | Negative |
| P18278 | AAALPYAAV PARADGQGNTG | Negative |
| P18278 | SAKRRSLLGILAAGTICAAA  | Negative |
| P18278 | GTICAAALPYAAV PARADGQ | Negative |
| P18278 | TRPASAKRRSLLGILAAGTI  | Negative |
| P18278 | AAV PARADGQGNTGEAIIHA | Negative |
| P18278 | YAAV PARADGQGNTGEAIIH | Negative |
| P18278 | PASAKRRSLLGILAAGTICA  | Negative |
| P18278 | AGTICAAALPYAAV PARADG | Negative |
| P18278 | LAAGTICAAALPYAAV PARA | Negative |
| P18278 | AV PARADGQGNTGEAIIHAD | Negative |
| P18278 | ALPYAAV PARADGQGNTGEA | Negative |
| P18278 | SLLGILAAGTICAAALPYAA  | Negative |
| P18278 | KRRSLLGILAAGTICAAALP  | Negative |

|        |                       |          |
|--------|-----------------------|----------|
| P18278 | LGILAAAGTICAAALPYAAVP | Negative |
| P18278 | RSLLGILAAAGTICAAALPYA | Negative |
| P18278 | AKRRSLLGILAAAGTICAAAL | Negative |
| P18278 | RPASAKRRSLLGILAAAGTIC | Negative |
| P18278 | PYAAVPARADGQGNTGEAII  | Negative |
| P18278 | LLGILAAAGTICAAALPYAAV | Negative |
| P18278 | AALPYAAVPARADGQGNTGE  | Negative |
| P18278 | MTRPASAKRRSLLGILAAAGT | Negative |
| P18328 | TCVTTKSIGGVTTEDCPAGQ  | Negative |
| P18328 | SIGGVTTEDCPAGQNVCFKR  | Negative |
| P18328 | LDLGYTLTCVTTKSIGGVTT  | Negative |
| P18328 | LLTLVVVTIVCLDLGYTLTC  | Negative |
| P18328 | TLLLTLVVVTIVCLDLGYTL  | Negative |
| P18328 | IVCLDLGYTLTCVTTKSIGG  | Negative |
| P18328 | KSIGGVTTEDCPAGQNVCFK  | Negative |
| P18328 | LVVVVTIVCLDLGYTLTCVTT | Negative |
| P18328 | VTIVCLDLGYTLTCVTTKSI  | Negative |
| P18328 | VCLDLGYTLTCVTTKSIGGV  | Negative |
| P18328 | DLGYTLTCVTTKSIGGVTTTE | Negative |
| P18328 | VVVVTIVCLDLGYTLTCVTTK | Negative |
| P18328 | LTCVTTKSIGGVTTEDCPAG  | Negative |
| P18328 | GYTLTCVTTKSIGGVTTEDC  | Negative |
| P18328 | TTKSIGGVTTEDCPAGQNV   | Negative |
| P18328 | LTLVVVTIVCLDLGYTLTCV  | Negative |
| P18328 | KTLLLTLVVVTIVCLDLGYT  | Negative |
| P18328 | TKSIGGVTTEDCPAGQNVCF  | Negative |
| P18328 | MKTLLLTLVVVTIVCLDLGY  | Negative |
| P18328 | YTLTCVTTKSIGGVTTEDCP  | Negative |
| P18328 | TIVCLDLGYTLTCVTTKSIG  | Negative |
| P18328 | CLDLGYTLTCVTTKSIGGV   | Negative |
| P18328 | CVTTKSIGGVTTEDCPAGQN  | Negative |
| P18328 | VVTIVCLDLGYTLTCVTTKS  | Negative |
| P18328 | IGGVTTEDCPAGQNVCFKRW  | Negative |
| P18328 | LLLTLVVVTIVCLDLGYTLT  | Negative |
| P18328 | TLTCVTTKSIGGVTTEDCPA  | Negative |
| P18328 | VTTKSIGGVTTEDCPAGQNV  | Negative |
| P18328 | LGYTLTCVTTKSIGGVTTED  | Negative |
| P18329 | CLDLAHTRICYSHKLLQAKT  | Negative |
| P18329 | CYSHKLLQAKTTKTCEENSC  | Negative |
| P18329 | LDLAHTRICYSHKLLQAKTT  | Negative |
| P18329 | LTLVVVTIVCLDLAHTRICY  | Negative |
| P18329 | VVTIVCLDLAHTRICYSHKL  | Negative |
| P18329 | AHTRICYSHKLLQAKTTKTC  | Negative |
| P18329 | KTLLLTLVVVTIVCLDLAHT  | Negative |
| P18329 | MKTLLLTLVVVTIVCLDLAH  | Negative |
| P18329 | HKLLQAKTTKTCEENSCYKR  | Negative |

|        |                       |          |
|--------|-----------------------|----------|
| P18329 | TLLLTLVVTVCLDLAHTR    | Negative |
| P18329 | VTIVCLDLAHTRICYSHKLL  | Negative |
| P18329 | HTRICYSHKLLQAKTTKTCE  | Negative |
| P18329 | SHKLLQAKTTKTCEENSCYK  | Negative |
| P18329 | LLTLLVTVIVCLDLAHTRIC  | Negative |
| P18329 | LAHTRICYSHKLLQAKTTKT  | Negative |
| P18329 | IVCLDLAHTRICYSHKLLQA  | Negative |
| P18329 | LLQAKTTKTCEENSCYKRS   | Negative |
| P18329 | VCLDLAHTRICYSHKLLQAK  | Negative |
| P18329 | TRICYSHKLLQAKTTKTCEE  | Negative |
| P18329 | LQAKTTKTCEENSCYKRS    | Negative |
| P18329 | KLLQAKTTKTCEENSCYKRS  | Negative |
| P18329 | TIVCLDLAHTRICYSHKLLQ  | Negative |
| P18329 | RICYSHKLLQAKTTKTCEEN  | Negative |
| P18329 | ICYSHKLLQAKTTKTCEENS  | Negative |
| P18329 | LLLTLVVTVIVCLDLAHTRI  | Negative |
| P18329 | YSHKLLQAKTTKTCEENSCY  | Negative |
| P18329 | LLVTVIVCLDLAHTRICYSH  | Negative |
| P18329 | DLAHTRICYSHKLLQAKTTK  | Negative |
| P18329 | LVVTVIVCLDLAHTRICYSHK | Negative |
| P18336 | WAQTAWERYKARFMMPDARI  | Negative |
| P18336 | AWERYKARFMMPDARIIDTA  | Negative |
| P18336 | RAWAQTAWERYKARFMMPDA  | Negative |
| P18336 | ERYKARFMMPDARIIDTANG  | Negative |
| P18336 | YKARFMMPDARIIDTANGNV  | Negative |
| P18336 | LRALVAVIVTTAVMLVPRAW  | Negative |
| P18336 | VPRAWAQTAWERYKARFMMP  | Negative |
| P18336 | LVPRAWAQTAWERYKARFMM  | Negative |
| P18336 | IVTTAVMLVPRAWAQTAWER  | Negative |
| P18336 | VAVIVTTAVMLVPRAWAQT   | Negative |
| P18336 | ALVAVIVTTAVMLVPRAWAQ  | Negative |
| P18336 | RALVAVIVTTAVMLVPRAWA  | Negative |
| P18336 | RYKARFMMPDARIIDTANGN  | Negative |
| P18336 | PRAWAQTAWERYKARFMMPD  | Negative |
| P18336 | TTAVMLVPRAWAQTAWERYK  | Negative |
| P18336 | WERYKARFMMPDARIIDTAN  | Negative |
| P18336 | LVAVIVTTAVMLVPRAWAQT  | Negative |
| P18336 | VTTAVMLVPRAWAQTAWERY  | Negative |
| P18336 | TAVMLVPRAWAQTAWERYKA  | Negative |
| P18336 | AVIVTTAVMLVPRAWAQTAW  | Negative |
| P18336 | AQTAWERYKARFMMPDARI   | Negative |
| P18336 | MLVPRAWAQTAWERYKARFM  | Negative |
| P18336 | PLRALVAVIVTTAVMLVPRA  | Negative |
| P18336 | VMLVPRAWAQTAWERYKARF  | Negative |
| P18336 | MPLRALVAVIVTTAVMLVPR  | Negative |
| P18336 | AWAQTAWERYKARFMMPDAR  | Negative |

|        |                       |          |
|--------|-----------------------|----------|
| P18336 | TAWERYKARFMMPDARIIDT  | Negative |
| P18336 | AVMLVPRAWAQTAWERYKAR  | Negative |
| P18336 | QTAWERYKARFMMPDARIID  | Negative |
| P18417 | LLLSSSSSSSSSPILKKIF   | Negative |
| P18417 | SSSPILKKIFIESPSYAPNA  | Negative |
| P18417 | SMMAVFFMFFLLLLSSSSSS  | Negative |
| P18417 | SSSSSPILKKIFIESPSYA   | Negative |
| P18417 | AVFFMFFLLLLSSSSSSSSSS | Negative |
| P18417 | SESKSMMAVFFMFFLLLLSS  | Negative |
| P18417 | SSSSSSSSSPILKKIFIESP  | Negative |
| P18417 | VFFMFFLLLLSSSSSSSSSS  | Negative |
| P18417 | SKSMMAVFFMFFLLLLSSSS  | Negative |
| P18417 | SSSPILKKIFIESPSYAPN   | Negative |
| P18417 | FMFFLLLLSSSSSSSSSSPI  | Negative |
| P18417 | NFSESKSMMAVFFMFFLLLL  | Negative |
| P18417 | MMAVFFMFFLLLLSSSSSSSS | Negative |
| P18417 | FFMFFLLLLSSSSSSSSSSP  | Negative |
| P18417 | SSSSSSSPILKKIFIESPSY  | Negative |
| P18417 | SSSSSPILKKIFIESPSYAP  | Negative |
| P18417 | SSSSSSSSSPILKKIFIES   | Negative |
| P18417 | KSMMAVFFMFFLLLLSSSSS  | Negative |
| P18417 | MANFSESKSMMAVFFMFFLL  | Negative |
| P18417 | MAVFFMFFLLLLSSSSSSSS  | Negative |
| P18417 | LLLSSSSSSSSSSPILKKI   | Negative |
| P18417 | LLSSSSSSSSSSPILKKIFI  | Negative |
| P18417 | LSSSSSSSSSSPILKKIFIE  | Negative |
| P18417 | SSSSSSSPILKKIFIESPS   | Negative |
| P18417 | ESKSMMAVFFMFFLLLLSSS  | Negative |
| P18417 | MFFLLLLSSSSSSSSSSPIL  | Negative |
| P18417 | FSESKSMMAVFFMFFLLLLS  | Negative |
| P18417 | ANFSESKSMMAVFFMFFLLL  | Negative |
| P18417 | FLLLLSSSSSSSSSSPILKK  | Negative |
| P18418 | AAADPAIYFKEQFLDGDAWT  | Negative |
| P18418 | SVPLLLGLLGLAAADPAIYF  | Negative |
| P18418 | DGDAWTNRWVESKHKSDFGK  | Negative |
| P18418 | GDAWTNRWVESKHKSDFGKF  | Negative |
| P18418 | QFLDGDWTNRWVESKHKSD   | Negative |
| P18418 | LLGLLGLAAADPAIYFKEQ   | Negative |
| P18418 | KEQFLDGDWTNRWVESKHK   | Negative |
| P18418 | YFKEQFLDGDWTNRWVESK   | Negative |
| P18418 | EQFLDGDWTNRWVESKHKS   | Negative |
| P18418 | AIYFKEQFLDGDWTNRWVE   | Negative |
| P18418 | ADPAIYFKEQFLDGDWTNR   | Negative |
| P18418 | PAIYFKEQFLDGDWTNRWV   | Negative |
| P18418 | FLDGDWTNRWVESKHKSDF   | Negative |
| P18418 | FKEQFLDGDWTNRWVESKH   | Negative |

|        |                      |          |
|--------|----------------------|----------|
| P18418 | LAAADPAIYFKEQFLDGDW  | Negative |
| P18418 | LLGLAAADPAIYFKEQFLDG | Negative |
| P18418 | GLAAADPAIYFKEQFLDGDA | Negative |
| P18418 | LLGLLGLAAADPAIYFKEQF | Negative |
| P18418 | MLLSVPLLLGLLGLAAADPA | Negative |
| P18418 | LLSVPLLLGLLGLAAADPAI | Negative |
| P18418 | PLLLGLLGLAAADPAIYFKE | Negative |
| P18418 | VPLLLGLLGLAAADPAIYFK | Negative |
| P18418 | LDGDAWTNRWVESKHKSDFG | Negative |
| P18418 | GLLGLAAADPAIYFKEQFLD | Negative |
| P18418 | AADPAIYFKEQFLDGDWNTN | Negative |
| P18418 | DPAIYFKEQFLDGDWNTNRW | Negative |
| P18418 | IYFKEQFLDGDWNTNRWVES | Negative |
| P18418 | LGLAAADPAIYFKEQFLDGD | Negative |
| P18418 | LGLLGLAAADPAIYFKEQFL | Negative |
| P18428 | STPEALGANPGLVARITDKG | Negative |
| P18428 | NPGLVARITDKGLQYAAQEG | Negative |
| P18428 | LGANPGLVARITDKGLQYAA | Negative |
| P18428 | ARALPSILLALLTSTPEAL  | Negative |
| P18428 | GANPGLVARITDKGLQYAAQ | Negative |
| P18428 | GLVARITDKGLQYAAQEGLL | Negative |
| P18428 | ANPGLVARITDKGLQYAAQE | Negative |
| P18428 | TPEALGANPGLVARITDKGL | Negative |
| P18428 | LLTSTPEALGANPGLVARIT | Negative |
| P18428 | RALPSILLALLTSTPEALG  | Negative |
| P18428 | LLLTSTPEALGANPGLVARI | Negative |
| P18428 | LARALPSILLALLTSTPEA  | Negative |
| P18428 | PEALGANPGLVARITDKGLQ | Negative |
| P18428 | LPSILLALLTSTPEALGAN  | Negative |
| P18428 | ALGANPGLVARITDKGLQYA | Negative |
| P18428 | EALGANPGLVARITDKGLQY | Negative |
| P18428 | PSILLALLTSTPEALGANP  | Negative |
| P18428 | ALPSILLALLTSTPEALGA  | Negative |
| P18428 | LLALLTSTPEALGANPGLV  | Negative |
| P18428 | MGALARALPSILLALLTST  | Negative |
| P18428 | LVARITDKGLQYAAQEGLLA | Negative |
| P18428 | LTSTPEALGANPGLVARITD | Negative |
| P18428 | ALLTSTPEALGANPGLVAR  | Negative |
| P18428 | TSTPEALGANPGLVARITDK | Negative |
| P18428 | ALARALPSILLALLTSTPE  | Negative |
| P18428 | LALLTSTPEALGANPGLVA  | Negative |
| P18428 | PGLVARITDKGLQYAAQEGL | Negative |
| P18428 | SILLALLTSTPEALGANPG  | Negative |
| P18428 | GALARALPSILLALLTSTP  | Negative |
| P18477 | AAMTLAAGALVAPTGAAPPA | Negative |
| P18477 | APTGAAPADPNGSTIDPDA  | Negative |

|        |                      |          |
|--------|----------------------|----------|
| P18477 | LVAPTGAAAPADPNGSTIDP | Negative |
| P18477 | AAPADPNGSTIDPDAATTLT | Negative |
| P18477 | GAAAPADPNGSTIDPDAATT | Negative |
| P18477 | LGLAAAMTLAAGALVAPTGA | Negative |
| P18477 | TLAAGALVAPTGAAAPADPN | Negative |
| P18477 | GLAAAMTLAAGALVAPTGAA | Negative |
| P18477 | MHSLNTRRGLGLAAAMTLAA | Negative |
| P18477 | VAPTGAAAPADPNGSTIDPD | Negative |
| P18477 | HSLNTRRGLGLAAAMTLAAG | Negative |
| P18477 | GALVAPTGAAAPADPNGSTI | Negative |
| P18477 | RRGLGLAAAMTLAAGALVAP | Negative |
| P18477 | TGAAAPADPNGSTIDPDAAT | Negative |
| P18477 | AMTLAAGALVAPTGAAAPAD | Negative |
| P18477 | AAAMTLAAGALVAPTGAAAP | Negative |
| P18477 | LNTRRGLGLAAAMTLAAGAL | Negative |
| P18477 | AGALVAPTGAAAPADPNGST | Negative |
| P18477 | AAGALVAPTGAAAPADPNGS | Negative |
| P18477 | NTRRGLGLAAAMTLAAGALV | Negative |
| P18477 | LAAAMTLAAGALVAPTGAAA | Negative |
| P18477 | AAAPADPNGSTIDPDAATTL | Negative |
| P18477 | ALVAPTGAAAPADPNGSTID | Negative |
| P18477 | PTGAAAPADPNGSTIDPDAA | Negative |
| P18477 | LAAGALVAPTGAAAPADPNG | Negative |
| P18477 | GLGLAAAMTLAAGALVAPTG | Negative |
| P18477 | TRRGLGLAAAMTLAAGALVA | Negative |
| P18477 | RGLGLAAAMTLAAGALVAPT | Negative |
| P18477 | SLNTRRGLGLAAAMTLAAGA | Negative |
| P18510 | FHSETICRPSGRKSSKMQAF | Negative |
| P18510 | ITLLLFLFHSETICRPSGRK | Negative |
| P18510 | EICRGLRSHLITLLLFLFHS | Negative |
| P18510 | RGLRSHLITLLLFLFHSETI | Negative |
| P18510 | FLFHSETICRPSGRKSSKMQ | Negative |
| P18510 | TLLLFLFHSETICRPSGRKS | Negative |
| P18510 | LLLFLFHSETICRPSGRKSS | Negative |
| P18510 | ICRPSGRKSSKMQAFRIWDV | Negative |
| P18510 | LFHSETICRPSGRKSSKMQA | Negative |
| P18510 | LLFLFHSETICRPSGRKSSK | Negative |
| P18510 | CRPSGRKSSKMQAFRIWDVN | Negative |
| P18510 | HLITLLLFLFHSETICRPSG | Negative |
| P18510 | HSETICRPSGRKSSKMQAFR | Negative |
| P18510 | RSHLITLLLFLFHSETICRP | Negative |
| P18510 | PSGRKSSKMQAFRIWDVNQK | Negative |
| P18510 | RKSSKMQAFRIWDVNQKTFY | Negative |
| P18510 | RPSGRKSSKMQAFRIWDVNQ | Negative |
| P18510 | SHLITLLLFLFHSETICRPS | Negative |
| P18510 | ETICRPSGRKSSKMQAFRIW | Negative |

|        |                      |          |
|--------|----------------------|----------|
| P18510 | ICRGLRSHLITLLLFLFHSE | Negative |
| P18510 | LFLFHSETICRPSGRKSSKM | Negative |
| P18510 | MEICRGLRSHLITLLLFLFH | Negative |
| P18510 | TICRPSGRKSSKMQAFRIWD | Negative |
| P18510 | LRSHLITLLLFLFHSETICR | Negative |
| P18510 | SETICRPSGRKSSKMQAFRI | Negative |
| P18510 | CRGLRSHLITLLLFLFHSET | Negative |
| P18510 | GLRSHLITLLLFLFHSETIC | Negative |
| P18510 | GRKSSKMQAFRIWDVNQKTF | Negative |
| P18510 | SGRKSSKMQAFRIWDVNQKT | Negative |
| P18632 | SFVIGSCFSDNPIDSCWRGD | Negative |
| P18632 | SCWRGDSNWAQNRMKLADCA | Negative |
| P18632 | CWRGDSNWAQNRMKLADCAV | Negative |
| P18632 | IDSCWRGDSNWAQNRMKLAD | Negative |
| P18632 | SPCLVALLVFSFVIGSCFSD | Negative |
| P18632 | LVALLVFSFVIGSCFSDNPI | Negative |
| P18632 | PIDSCWRGDSNWAQNRMKLA | Negative |
| P18632 | SDNPIDSCWRGDSNWAQNRM | Negative |
| P18632 | VIGSCFSDNPIDSCWRGDSN | Negative |
| P18632 | FVIGSCFSDNPIDSCWRGDS | Negative |
| P18632 | CLVALLVFSFVIGSCFSDNP | Negative |
| P18632 | RGDSNWAQNRMKLADCAVGF | Negative |
| P18632 | NPIDSCWRGDSNWAQNRMKL | Negative |
| P18632 | PCLVALLVFSFVIGSCFSDN | Negative |
| P18632 | FSDNPIDSCWRGDSNWAQNR | Negative |
| P18632 | GSCFSDNPIDSCWRGDSNWA | Negative |
| P18632 | VFSFVIGSCFSDNPIDSCWR | Negative |
| P18632 | DSPCLVALLVFSFVIGSCFS | Negative |
| P18632 | LLVFSFVIGSCFSDNPIDSC | Negative |
| P18632 | MDSPCLVALLVFSFVIGSCF | Negative |
| P18632 | FSFVIGSCFSDNPIDSCWRG | Negative |
| P18632 | DNPIDSCWRGDSNWAQNRMK | Negative |
| P18632 | ALLVFSFVIGSCFSDNPIDS | Negative |
| P18632 | WRGDSNWAQNRMKLADCAVG | Negative |
| P18632 | IGSCFSDNPIDSCWRGDSNW | Negative |
| P18632 | DSCWRGDSNWAQNRMKLADC | Negative |
| P18632 | SCFSDNPIDSCWRGDSNWAQ | Negative |
| P18632 | LVFSFVIGSCFSDNPIDSCW | Negative |
| P18632 | CFSDNPIDSCWRGDSNWAQN | Negative |
| P18657 | SMVLEGPAPAQGAPDVSSAL | Negative |
| P18657 | RLFLSLPVLVVVLSMVLEGP | Negative |
| P18657 | SLPVLVVVLSMVLEGPAPAQ | Negative |
| P18657 | MRLFLSLPVLVVVLSMVLEG | Negative |
| P18657 | LFLSLPVLVVVLSMVLEGPA | Negative |
| P18657 | LSLPVLVVVLSMVLEGPAPA | Negative |
| P18657 | GPAPAQGAPDVSSALDKLKE | Negative |

|        |                      |          |
|--------|----------------------|----------|
| P18657 | VLSMVLEGPAPAQGAPDVSS | Negative |
| P18657 | LVVVLSMVLEGPAPAQGAPD | Negative |
| P18657 | PAQGAPDVSSALDKLKEFGN | Negative |
| P18657 | EGPAPAQGAPDVSSALDKLK | Negative |
| P18657 | VLEGPAPAQGAPDVSSALDK | Negative |
| P18657 | VSSALDKLKEFGNTLEDKAW | Negative |
| P18657 | GAPDVSSALDKLKEFGNTLE | Negative |
| P18657 | MVLEGPAPAQGAPDVSSALD | Negative |
| P18657 | LSMVLEGPAPAQGAPDVSSA | Negative |
| P18657 | PAPAQGAPDVSSALDKLKEF | Negative |
| P18657 | LPVLVVVLSMVLEGPAPAQG | Negative |
| P18657 | AQGAPDVSSALDKLKEFGNT | Negative |
| P18657 | PDVSSALDKLKEFGNTLEDK | Negative |
| P18657 | VVVLSMVLEGPAPAQGAPDV | Negative |
| P18657 | LEGPAPAQGAPDVSSALDKL | Negative |
| P18657 | DVSSALDKLKEFGNTLEDKA | Negative |
| P18657 | VLVVVLSMVLEGPAPAQGAP | Negative |
| P18657 | APAQGAPDVSSALDKLKEFG | Negative |
| P18657 | PVLVVVLSMVLEGPAPAQGA | Negative |
| P18657 | QGAPDVSSALDKLKEFGNTL | Negative |
| P18657 | FLSLPVLVVVLSMVLEGPAP | Negative |
| P18657 | APDVSSALDKLKEFGNTLED | Negative |
| P18658 | LALCLVLLVLGFEVQGAQLP | Negative |
| P18658 | QGAQLPQQDEPPSPALLSRV | Negative |
| P18658 | EPPSPALLSRVQESLSSYWE | Negative |
| P18658 | PQQDEPPSPALLSRVQESLS | Negative |
| P18658 | VLGFEVQGAQLPQQDEPPSP | Negative |
| P18658 | EVQGAQLPQQDEPPSPALLS | Negative |
| P18658 | LVLGFEVQGAQLPQQDEPPS | Negative |
| P18658 | QDEPPSPALLSRVQESLSSY | Negative |
| P18658 | LCLVLLVLGFEVQGAQLPQQ | Negative |
| P18658 | QLPQQDEPPSPALLSRVQES | Negative |
| P18658 | DEPPSPALLSRVQESLSSYW | Negative |
| P18658 | VLLVLGFEVQGAQLPQQDEP | Negative |
| P18658 | TRFLLALCLVLLVLGFEVQG | Negative |
| P18658 | GAQLPQQDEPPSPALLSRVQ | Negative |
| P18658 | LPQQDEPPSPALLSRVQESL | Negative |
| P18658 | FEVQGAQLPQQDEPPSPALL | Negative |
| P18658 | LLALCLVLLVLGFEVQGAQL | Negative |
| P18658 | CLVLLVLGFEVQGAQLPQQD | Negative |
| P18658 | VQGAQLPQQDEPPSPALLSR | Negative |
| P18658 | FLLALCLVLLVLGFEVQGAQ | Negative |
| P18658 | GTRFLLALCLVLLVLGFEVQ | Negative |
| P18658 | LVLLVLGFEVQGAQLPQQDE | Negative |
| P18658 | LGFEVQGAQLPQQDEPPSPA | Negative |
| P18658 | QQDEPPSPALLSRVQESLSS | Negative |



|        |                      |          |
|--------|----------------------|----------|
| P18658 | RFLALCLVLLVLGFVQGA   | Negative |
| P18658 | MGTRFLLALCLVLLVLGFV  | Negative |
| P18658 | AQLPQQDEPPSPALLSRVQE | Negative |
| P18658 | GFEVQGAQLPQQDEPPSPAL | Negative |
| P18658 | LLVLGFVQGAQLPQQDEPP  | Negative |
| P18659 | EAEDTSLLGFMQGYMQHATK | Negative |
| P18659 | RASEAEDTSLLGFMQGYMQH | Negative |
| P18659 | LASARASEAEDTSLLGFMQG | Negative |
| P18659 | TSLGFMQGYMQHATKTAKD  | Negative |
| P18659 | VLLVAALLSLLASARASEAE | Negative |
| P18659 | LLASARASEAEDTSLLGFMQ | Negative |
| P18659 | ARASEAEDTSLLGFMQGYMQ | Negative |
| P18659 | AALLSLLASARASEAEDTSL | Negative |
| P18659 | VAALLSLLASARASEAEDTS | Negative |
| P18659 | LVAALLSLLASARASEAEDT | Negative |
| P18659 | SLLGFMQGYMQHATKTAKDA | Negative |
| P18659 | AEDTSLLGFMQGYMQHATKT | Negative |
| P18659 | RVLLVAALLSLLASARASEA | Negative |
| P18659 | ALLSLLASARASEAEDTSLL | Negative |
| P18659 | SLLASARASEAEDTSLLGFM | Negative |
| P18659 | SARASEAEDTSLLGFMQGYM | Negative |
| P18659 | PRVLLVAALLSLLASARASE | Negative |
| P18659 | QPRVLLVAALLSLLASARAS | Negative |
| P18659 | MQPRVLLVAALLSLLASARA | Negative |
| P18659 | ASARASEAEDTSLLGFMQGY | Negative |
| P18659 | ASEAEDTSLLGFMQGYMQHA | Negative |
| P18659 | SEAEDTSLLGFMQGYMQHAT | Negative |
| P18659 | LLGFMQGYMQHATKTAKDAL | Negative |
| P18659 | DTSLLGFMQGYMQHATKTAK | Negative |
| P18659 | LLSLLASARASEAEDTSLLG | Negative |
| P18659 | GFMQGYMQHATKTAKDALTS | Negative |
| P18659 | EDTSLLGFMQGYMQHATKTA | Negative |
| P18659 | LGFMQGYMQHATKTAKDALT | Negative |
| P18659 | LSLLASARASEAEDTSLLGF | Negative |
| P18684 | VMADEKPKLILPTPAPPNLP | Negative |
| P18684 | LFYLLVICALSLAVMADEKP | Negative |
| P18684 | LAVMADEKPKLILPTPAPPN | Negative |
| P18684 | LVICALSLAVMADEKPKLIL | Negative |
| P18684 | ILPTPAPPNLPQLVGGGGGN | Negative |
| P18684 | KLFYLLVICALSLAVMADEK | Negative |
| P18684 | ALSLAVMADEKPKLILPTPA | Negative |
| P18684 | PTPAPPNLPQLVGGGGGNRK | Negative |
| P18684 | EKPKLILPTPAPPNLPQLVG | Negative |
| P18684 | ICALSLAVMADEKPKLILPT | Negative |
| P18684 | SLAVMADEKPKLILPTPAPP | Negative |
| P18684 | ADEKPKLILPTPAPPNLPQL | Negative |

|        |                      |          |
|--------|----------------------|----------|
| P18684 | DEKPKLILPTAPPNLPQLV  | Negative |
| P18684 | LILPTAPPNLPQLVGGGGG  | Negative |
| P18684 | PAPPNLPQLVGGGGGNRKDG | Negative |
| P18684 | KLILPTAPPNLPQLVGGGG  | Negative |
| P18684 | CALSLAVMADEKPKLILPTP | Negative |
| P18684 | PKLILPTAPPNLPQLVGGG  | Negative |
| P18684 | TPAPPNLPQLVGGGGGNRKD | Negative |
| P18684 | YLLVICALSLAVMADEKPKL | Negative |
| P18684 | LLVICALSLAVMADEKPKLI | Negative |
| P18684 | APPNLPQLVGGGGGNRKDGF | Negative |
| P18684 | MKLFYLLVICALSLAVMADE | Negative |
| P18684 | LSLAVMADEKPKLILPTAP  | Negative |
| P18684 | LPTAPPNLPQLVGGGGGNR  | Negative |
| P18684 | MADEKPKLILPTAPPNLPQ  | Negative |
| P18684 | KPKLILPTAPPNLPQLVGG  | Negative |
| P18684 | AVMADEKPKLILPTAPPNL  | Negative |
| P18684 | VICALSLAVMADEKPKLILP | Negative |
| P18761 | SVVSLFFLGIQAHSWYSYG  | Negative |
| P18761 | GVGESQWSEQYPSCGGERQS | Negative |
| P18761 | VGESQWSEQYPSCGGERQSP | Negative |
| P18761 | YSGDDGVGESQWSEQYPSCG | Negative |
| P18761 | SDWSYSGDDGVGESQWSEQY | Negative |
| P18761 | LFFLGIQAHSWYSYGDDGV  | Negative |
| P18761 | FLGIQAHSWYSYGDDGVGE  | Negative |
| P18761 | VSVVSLFFLGIQAHSWYSY  | Negative |
| P18761 | VSLFFLGIQAHSWYSYGDD  | Negative |
| P18761 | SLFFLGIQAHSWYSYGDDG  | Negative |
| P18761 | AHSWYSYGDDGVGESQWSE  | Negative |
| P18761 | MRALVSVVSLFFLGIQAHS  | Negative |
| P18761 | SYSGDDGVGESQWSEQYPSC | Negative |
| P18761 | DDGVGESQWSEQYPSCGGER | Negative |
| P18761 | LGIQAHSWYSYGDDGVGES  | Negative |
| P18761 | VVSLFFLGIQAHSWYSYSGD | Negative |
| P18761 | GDDGVGESQWSEQYPSCGGE | Negative |
| P18761 | LVSVVSLFFLGIQAHSWSY  | Negative |
| P18761 | DWSYSGDDGVGESQWSEQYP | Negative |
| P18761 | QAHSWYSYGDDGVGESQWS  | Negative |
| P18761 | SGDDGVGESQWSEQYPSCGG | Negative |
| P18761 | IQAHSWYSYGDDGVGESQW  | Negative |
| P18761 | GIQAHSWYSYGDDGVGESQ  | Negative |
| P18761 | FFLGIQAHSWYSYGDDGVG  | Negative |
| P18761 | RALVSVVSLFFLGIQAHSW  | Negative |
| P18761 | HSDWSYSGDDGVGESQWSEQ | Negative |
| P18761 | WSYSGDDGVGESQWSEQYPS | Negative |
| P18761 | DGVGESQWSEQYPSCGGERQ | Negative |
| P18761 | GESQWSEQYPSCGGERQSPI | Negative |

|        |                       |          |
|--------|-----------------------|----------|
| P18829 | ALCSAQLNFTPWNWGTGKRDA | Negative |
| P18829 | AAALCSAQLNFTPWNWGTGKR | Negative |
| P18829 | LLVVVVAAALCSAQLNFTP   | Negative |
| P18829 | AALCSAQLNFTPWNWGTGKRD | Negative |
| P18829 | VVVVAAALCSAQLNFTPWNW  | Negative |
| P18829 | VVVAALCSAQLNFTPWNWGT  | Negative |
| P18829 | NFTPWNWGTGKRDAADFGDPY | Negative |
| P18829 | AQLNFTPWNWGTGKRDAADFG | Negative |
| P18829 | CSAQLNFTPWNWGTGKRDAAD | Negative |
| P18829 | VVALLVVVVAAALCSAQLNF  | Negative |
| P18829 | VQRCLVALLVVVVAAALCS   | Negative |
| P18829 | TPNWGTGKRDAADFGDPYSF  | Negative |
| P18829 | LVVALLVVVVAAALCSAQLN  | Negative |
| P18829 | MVQRCLVALLVVVVAAALC   | Negative |
| P18829 | VAAALCSAQLNFTPWNWGTGK | Negative |
| P18829 | QRCLVALLVVVVAAALCSA   | Negative |
| P18829 | LNFTPWNWGTGKRDAADFGDP | Negative |
| P18829 | CLVALLVVVVAAALCSAQL   | Negative |
| P18829 | WGTGKRDAADFGDPYSFLYR  | Negative |
| P18829 | LVVVVAAALCSAQLNFTP    | Negative |
| P18829 | FTPWNWGTGKRDAADFGDPYS | Negative |
| P18829 | QLNFTPWNWGTGKRDAADFGD | Negative |
| P18829 | ALLVVVVAAALCSAQLNFTP  | Negative |
| P18829 | SAQLNFTPWNWGTGKRDAADF | Negative |
| P18829 | RCLVALLVVVVAAALCSAQ   | Negative |
| P18829 | NWGTGKRDAADFGDPYSFLY  | Negative |
| P18829 | PNWGTGKRDAADFGDPYSFL  | Negative |
| P18829 | VVAAALCSAQLNFTPWNWGTG | Negative |
| P18829 | LCSAQLNFTPWNWGTGKRDA  | Negative |
| P18895 | LGAPAFANSGEAPKNFGLD   | Negative |
| P18895 | ALSLAIALLLGAPAFANS    | Negative |
| P18895 | LLGAPAFANSGEAPKNFG    | Negative |
| P18895 | SSRSVNPRPSFAPRALS     | Negative |
| P18895 | PSFAPRALSIAIALLLGAP   | Negative |
| P18895 | GAPAFANSGEAPKNFGLDV   | Negative |
| P18895 | SVNPRPSFAPRALSIAIAL   | Negative |
| P18895 | PAFANSGEAPKNFGLDVKI   | Negative |
| P18895 | FAPRALSIAIALLLGAPAF   | Negative |
| P18895 | IAIALLLGAPAFANSGEAPK  | Negative |
| P18895 | APAFANSGEAPKNFGLDVK   | Negative |
| P18895 | LLGAPAFANSGEAPKNFGL   | Negative |
| P18895 | NPRPSFAPRALSIAIALLLG  | Negative |
| P18895 | VNPRPSFAPRALSIAIALLL  | Negative |
| P18895 | LAIALLLGAPAFANSGEAP   | Negative |
| P18895 | MNSSRSVNPRPSFAPRALS   | Negative |
| P18895 | SRSVNPRPSFAPRALSIA    | Negative |

|        |                        |          |
|--------|------------------------|----------|
| P18895 | NSSRSVNPRPSFAPRALSLA   | Negative |
| P18895 | AFAANSGEAPKNFGLDVKIT   | Negative |
| P18895 | RSVNPRPSFAPRALSLAIAL   | Negative |
| P18895 | RPSFAPRALSLAIALLLGAP   | Negative |
| P18895 | SFAPRALSLAIALLLGAPAF   | Negative |
| P18895 | IALLLGAPAFANAANSGEAPKN | Negative |
| P18895 | PRALSLAIALLLGAPAFANA   | Negative |
| P18895 | APRALSLAIALLLGAPAFAA   | Negative |
| P18895 | PRPSFAPRALSLAIALLLGA   | Negative |
| P18895 | SLAIALLLGAPAFANAANSGEA | Negative |
| P18895 | ALLLGAPAFANAANSGEAPKNF | Negative |
| P18895 | RALSLAIALLLGAPAFANAANS | Negative |
| P18956 | PPAPPVSYGVEEDVFHPVRA   | Negative |
| P18956 | LSGSCFSAAAAPPAPPVSYG   | Negative |
| P18956 | GSCFSAAAAPPAPPVSYGVE   | Negative |
| P18956 | LLSGSCFSAAAAPPAPPVSY   | Negative |
| P18956 | AAAPPAPPVSYGVEEDVFHP   | Negative |
| P18956 | ALLSGSCFSAAAAPPAPPVS   | Negative |
| P18956 | AAAAPPAPPVSYGVEEDVFH   | Negative |
| P18956 | PTFLRRVAIAALLSGSCFSA   | Negative |
| P18956 | PAPPVSYGVEEDVFHPVRAK   | Negative |
| P18956 | CFSAAAAPPAPPVSYGVEED   | Negative |
| P18956 | KPTFLRRVAIAALLSGSCFS   | Negative |
| P18956 | VAIAALLSGSCFSAAAAPPA   | Negative |
| P18956 | PPVSYGVEEDVFHPVRAKQG   | Negative |
| P18956 | APPAPPVSYGVEEDVFHPVR   | Negative |
| P18956 | TFLRRVAIAALLSGSCFSAA   | Negative |
| P18956 | RRVAIAALLSGSCFSAAAAP   | Negative |
| P18956 | FLRRVAIAALLSGSCFSAAA   | Negative |
| P18956 | LRRVAIAALLSGSCFSAAAA   | Negative |
| P18956 | APPVSYGVEEDVFHPVRAKQ   | Negative |
| P18956 | RVAIAALLSGSCFSAAAAPP   | Negative |
| P18956 | SGSCFSAAAAPPAPPVSYGV   | Negative |
| P18956 | IKPTFLRRVAIAALLSGSCF   | Negative |
| P18956 | SAAAAPPAPPVSYGVEEDVF   | Negative |
| P18956 | IAALLSGSCFSAAAAPPAPP   | Negative |
| P18956 | FSAAAAPPAPPVSYGVEEDV   | Negative |
| P18956 | AAPPAPPVSYGVEEDVFHPV   | Negative |
| P18956 | MIKPTFLRRVAIAALLSGSC   | Negative |
| P18956 | SCFSAAAAPPAPPVSYGVEE   | Negative |
| P18956 | AALLSGSCFSAAAAPPAPPV   | Negative |
| P18958 | GCMASLRLPSAAELSGQWV    | Negative |
| P18958 | ASSLRLPSAAELSGQWVLSG   | Negative |
| P18958 | LSALSGGCMASLRLPSAAE    | Negative |
| P18958 | LRLPSAAELSGQWVLSGAEQ   | Negative |
| P18958 | LIIATLLSALSGGCMASLR    | Negative |

|        |                       |          |
|--------|-----------------------|----------|
| P18958 | IATLLSALSGGCMASSLRLP  | Negative |
| P18958 | SALSGGCMASSLRLPSAAEL  | Negative |
| P18958 | SAAELSGQWVLSGAEQHCDI  | Negative |
| P18958 | AAELSGQWVLSGAEQHCDIR  | Negative |
| P18958 | SGGCMASSLRLPSAAELSGQ  | Negative |
| P18958 | MASSRLRLPSAAELSGQWVLS | Negative |
| P18958 | ELSGQWVLSGAEQHCDIRLN  | Negative |
| P18958 | QLIIATLLSALSGGCMASSL  | Negative |
| P18958 | MKQLIIATLLSALSGGCMAS  | Negative |
| P18958 | KQLIIATLLSALSGGCMASS  | Negative |
| P18958 | RLPSAAELSGQWVLSGAEQH  | Negative |
| P18958 | PSAAELSGQWVLSGAEQHCD  | Negative |
| P18958 | LSGQWVLSGAEQHCDIRLNT  | Negative |
| P18958 | GGCMASSLRLPSAAELSGQW  | Negative |
| P18958 | ATLLSALSGGCMASSLRLPS  | Negative |
| P18958 | LPSAAELSGQWVLSGAEQHC  | Negative |
| P18958 | LLSALSGGCMASSLRLPSAA  | Negative |
| P18958 | CMASSLRLPSAAELSGQWVL  | Negative |
| P18958 | SLRLPSAAELSGQWVLSGAE  | Negative |
| P18958 | SSLRLPSAAELSGQWVLSGA  | Negative |
| P18958 | AELSGQWVLSGAEQHCDIRL  | Negative |
| P18958 | ALSGGCMASSLRLPSAAELS  | Negative |
| P18958 | TLLSALSGGCMASSLRLPSA  | Negative |
| P18958 | LSGGCMASSLRLPSAAELSG  | Negative |
| P18959 | GNVDSSPDVMKNLCLNFGKA  | Negative |
| P18959 | VVYLA VGNVDSSPDVMKNLC | Negative |
| P18959 | YLA VGNVDSSPDVMKNLCLN | Negative |
| P18959 | VAIVVYLA VGNVDSSPDVMK | Negative |
| P18959 | AVGNVDSSPDVMKNLCLNFG  | Negative |
| P18959 | DVMKNLCLNFGKALDECKAE  | Negative |
| P18959 | MNKTTTKMKVAVVAIVVYLA  | Negative |
| P18959 | SPDVMKNLCLNFGKALDECK  | Negative |
| P18959 | DSSPDVMKNLCLNFGKALDE  | Negative |
| P18959 | LAVGNVDSSPDVMKNLCLNF  | Negative |
| P18959 | VGNVDSSPDVMKNLCLNFGK  | Negative |
| P18959 | TTTKMKVAVVAIVVYLA VGN | Negative |
| P18959 | NVDSSPDVMKNLCLNFGKAL  | Negative |
| P18959 | AIVVYLA VGNVDSSPDVMKN | Negative |
| P18959 | PDVMKNLCLNFGKALDECKA  | Negative |
| P18959 | MKVAVVAIVVYLA VGNVDSS | Negative |
| P18959 | IVVYLA VGNVDSSPDVMKNL | Negative |
| P18959 | TKMKVAVVAIVVYLA VGNVD | Negative |
| P18959 | AVVAIVVYLA VGNVDSSPDV | Negative |
| P18959 | VMKNLCLNFGKALDECKAEM  | Negative |
| P18959 | NKTTTKMKVAVVAIVVYLA V | Negative |
| P18959 | VDSSPDVMKNLCLNFGKALD  | Negative |

|        |                       |          |
|--------|-----------------------|----------|
| P18959 | VAVVAIVVYLAVGNVDSSPD  | Negative |
| P18959 | TTKMKVAVVAIVVYLAVGNV  | Negative |
| P18959 | SSPDVMKNLCLNFGKALDEC  | Negative |
| P18959 | KVAVVAIVVYLAVGNVDSSP  | Negative |
| P18959 | KTTTKMKVAVVAIVVYLAVG  | Negative |
| P18959 | VYLAVGNVDSSPDVMKNLCL  | Negative |
| P18959 | KMKVAVVAIVVYLAVGNVDS  | Negative |
| P18998 | SLVEFETLIMKIAGRSGISY  | Negative |
| P18998 | IMKIAGRSGISYYSSYGCYC  | Negative |
| P18998 | IAGRSGISYYSSYGCYCGAG  | Negative |
| P18998 | EFETLIMKIAGRSGISYYSS  | Negative |
| P18998 | VAVLLVGVEGSLVEFETLIM  | Negative |
| P18998 | LVGVEGSLVEFETLIMKIAG  | Negative |
| P18998 | FETLIMKIAGRSGISYYSSY  | Negative |
| P18998 | WIVAVLLVGVEGSLVEFETL  | Negative |
| P18998 | LVEFETLIMKIAGRSGISYY  | Negative |
| P18998 | VLLVGVEGSLVEFETLIMKI  | Negative |
| P18998 | AGRSGISYYSSYGCYCGAGG  | Negative |
| P18998 | VEFETLIMKIAGRSGISYYSS | Negative |
| P18998 | LIMKIAGRSGISYYSSYGCY  | Negative |
| P18998 | IVAVLLVGVEGSLVEFETLI  | Negative |
| P18998 | LWIVAVLLVGVEGSLVEFET  | Negative |
| P18998 | VGVEGSLVEFETLIMKIAGR  | Negative |
| P18998 | AVLLVGVEGSLVEFETLIMK  | Negative |
| P18998 | LLVGVEGSLVEFETLIMKIA  | Negative |
| P18998 | KIAGRSGISYYSSYGCYCGA  | Negative |
| P18998 | GVEGSLVEFETLIMKIAGRS  | Negative |
| P18998 | VEGSLVEFETLIMKIAGRSG  | Negative |
| P18998 | ALWIVAVLLVGVEGSLVEFE  | Negative |
| P18998 | EGSLVEFETLIMKIAGRSGI  | Negative |
| P18998 | TLIMKIAGRSGISYYSSYGC  | Negative |
| P18998 | GRSGISYYSSYGCYCGAGGQ  | Negative |
| P18998 | RALWIVAVLLVGVEGSLVEF  | Negative |
| P18998 | ETLIMKIAGRSGISYYSSYG  | Negative |
| P18998 | MRALWIVAVLLVGVEGSLVE  | Negative |
| P18998 | GSLVEFETLIMKIAGRSGIS  | Negative |
| P19007 | ADFGNEVTDIADDSCPKPPE  | Negative |
| P19007 | MRALGAVITLLLWGQLFAAD  | Negative |
| P19007 | WGQLFAADFGNEVTDIADDS  | Negative |
| P19007 | DIADDSCPKPPEIANGYVEH  | Negative |
| P19007 | FGNEVTDIADDSCPKPPEIA  | Negative |
| P19007 | TLLLWGQLFAADFGNEVTDI  | Negative |
| P19007 | ITLLLWGQLFAADFGNEVTD  | Negative |
| P19007 | TDIADDSCPKPPEIANGYVE  | Negative |
| P19007 | QLFAADFGNEVTDIADDSCP  | Negative |
| P19007 | DDSCPKPPEIANGYVEHLVR  | Negative |

|        |                       |          |
|--------|-----------------------|----------|
| P19007 | LWGQLFAADFGNEVTDIADD  | Negative |
| P19007 | IADDSCPKPPEIANGYVEHL  | Negative |
| P19007 | ADDSCPKPPEIANGYVEHLV  | Negative |
| P19007 | ALGAVITLLLWGQLFAADFG  | Negative |
| P19007 | LLLWGQLFAADFGNEVTDIA  | Negative |
| P19007 | AADFGNEVTDIADDSCPKPP  | Negative |
| P19007 | EVTDIADDSCPKPPEIANGY  | Negative |
| P19007 | RALGAVITLLLWGQLFAADF  | Negative |
| P19007 | GAVITLLLWGQLFAADFGNE  | Negative |
| P19007 | DFGNEVTDIADDSCPKPPEI  | Negative |
| P19007 | GNEVTDIADDSCPKPPEIAN  | Negative |
| P19007 | LFAADFGNEVTDIADDSCPK  | Negative |
| P19007 | LLWGQLFAADFGNEVTDIAD  | Negative |
| P19007 | NEVTDIADDSCPKPPEIANG  | Negative |
| P19007 | GQLFAADFGNEVTDIADDSC  | Negative |
| P19007 | FAADFGNEVTDIADDSCPKP  | Negative |
| P19007 | VTDIADDSCPKPPEIANGYV  | Negative |
| P19007 | AVITLLLWGQLFAADFGNEV  | Negative |
| P19007 | VITLLLWGQLFAADFGNEVT  | Negative |
| P19034 | LVLGFEVQGAHVPQQDEASS  | Negative |
| P19034 | EASSPALLTQVQESLLGYWD  | Negative |
| P19034 | RYFLVGFLILLVLGFEVQGA  | Negative |
| P19034 | LLVLGFEVQGAHVPQQDEAS  | Negative |
| P19034 | TRYFLVGFLILLVLGFEVQGG | Negative |
| P19034 | EVQGAHVPQQDEASSPALLT  | Negative |
| P19034 | GAHVPQQDEASSPALLTQVQ  | Negative |
| P19034 | LGFEVQGAHVPQQDEASSPA  | Negative |
| P19034 | QGAHVPQQDEASSPALLTQV  | Negative |
| P19034 | AHVPQQDEASSPALLTQVQE  | Negative |
| P19034 | MGTRYFLVGFLILLVLGFEV  | Negative |
| P19034 | LVGFLILLVLGFEVQGAHVP  | Negative |
| P19034 | DEASSPALLTQVQESLLGYW  | Negative |
| P19034 | FLVGFLILLVLGFEVQGAHV  | Negative |
| P19034 | FEVQGAHVPQQDEASSPALL  | Negative |
| P19034 | FLILLVLGFEVQGAHVPQQD  | Negative |
| P19034 | VLGFEVQGAHVPQQDEASSP  | Negative |
| P19034 | ILLVLGFEVQGAHVPQQDEA  | Negative |
| P19034 | PQQDEASSPALLTQVQESLL  | Negative |
| P19034 | GFEVQGAHVPQQDEASSPAL  | Negative |
| P19034 | QQDEASSPALLTQVQESLLG  | Negative |
| P19034 | GFLILLVLGFEVQGAHVPQQ  | Negative |
| P19034 | VPQQDEASSPALLTQVQESL  | Negative |
| P19034 | YFLVGFLILLVLGFEVQGAH  | Negative |
| P19034 | LILLVLGFEVQGAHVPQQDE  | Negative |
| P19034 | QDEASSPALLTQVQESLLGY  | Negative |
| P19034 | HVPQQDEASSPALLTQVQES  | Negative |

|        |                      |          |
|--------|----------------------|----------|
| P19034 | VQGAHVPPQDEASSPALLTQ | Negative |
| P19034 | GTRYFLVGFLILLVLGFEVQ | Negative |
| P19035 | ALLVLPEATKAEEGSLLDKM | Negative |
| P19035 | PRLLLLAAFLALLVLPEATK | Negative |
| P19035 | DKMQGYVKEATKTAKDALSS | Negative |
| P19035 | QPRLLLLAAFLALLVLPEAT | Negative |
| P19035 | LPEATKAEEGSLLDKMQGYV | Negative |
| P19035 | ATKAEEGSLLDKMQGYVKEA | Negative |
| P19035 | AEEGSLLDKMQGYVKEATKT | Negative |
| P19035 | AFLALLVLPEATKAEEGSL  | Negative |
| P19035 | FLALLVLPEATKAEEGSLD  | Negative |
| P19035 | LLDKMQGYVKEATKTAKDAL | Negative |
| P19035 | EEGSLLDKMQGYVKEATKTA | Negative |
| P19035 | LLVLPEATKAEEGSLLDKM  | Negative |
| P19035 | SLLDKMQGYVKEATKTAKDA | Negative |
| P19035 | MQPRLLLLAAFLALLVLPEA | Negative |
| P19035 | KAEEGSLLDKMQGYVKEATK | Negative |
| P19035 | PEATKAEEGSLLDKMQGYVK | Negative |
| P19035 | LDKMQGYVKEATKTAKDAL  | Negative |
| P19035 | LLLLAAFLALLVLPEATKAE | Negative |
| P19035 | LLAAFLALLVLPEATKAEEG | Negative |
| P19035 | LVLPEATKAEEGSLLDKM   | Negative |
| P19035 | LALLVLPEATKAEEGSLDK  | Negative |
| P19035 | GSLDKMQGYVKEATKTAKD  | Negative |
| P19035 | VLPEATKAEEGSLLDKM    | Negative |
| P19035 | TKAEEGSLLDKMQGYVKEAT | Negative |
| P19035 | LAAFLALLVLPEATKAEEG  | Negative |
| P19035 | LLAAFLALLVLPEATKAE   | Negative |
| P19035 | EGSLDKMQGYVKEATKTAK  | Negative |
| P19035 | RLLLLAAFLALLVLPEATKA | Negative |
| P19035 | EATKAEEGSLLDKMQGYVKE | Negative |
| P19111 | LSLGLVPVEEEDPAFWNRQA | Negative |
| P19111 | LLLGLHLQLSLGLVPVEEED | Negative |
| P19111 | MQGACVLLLLGLHLQLSLGL | Negative |
| P19111 | GLHLQLSLGLVPVEEEDPAF | Negative |
| P19111 | GLVPVEEEDPAFWNRQAAQA | Negative |
| P19111 | FWNRQAAQALDVAKKLQPIQ | Negative |
| P19111 | AFWNRQAAQALDVAKKLQPI | Negative |
| P19111 | LQLSLGLVPVEEEDPAFWNR | Negative |
| P19111 | HLQLSLGLVPVEEEDPAFWN | Negative |
| P19111 | PVEEEDPAFWNRQAAQALDV | Negative |
| P19111 | LGLVPVEEEDPAFWNRQAAQ | Negative |
| P19111 | GACVLLLLGLHLQLSLGLVP | Negative |
| P19111 | SLGLVPVEEEDPAFWNRQAA | Negative |
| P19111 | DPAFWNRQAAQALDVAKKLQ | Negative |
| P19111 | QGACVLLLLGLHLQLSLGLV | Negative |



|        |                      |          |
|--------|----------------------|----------|
| P19111 | VEEEDPAFWNRQAAQALDVA | Negative |
| P19111 | VPVEEEDPAFWNRQAAQALD | Negative |
| P19111 | LLLGLHLQLSLGLVPVEEE  | Negative |
| P19111 | LLGLHLQLSLGLVPVEEEDP | Negative |
| P19111 | EEEDPAFWNRQAAQALDVAK | Negative |
| P19111 | ACVLLLGLHLQLSLGLVPV  | Negative |
| P19111 | QLSLGLVPVEEEDPAFWNRQ | Negative |
| P19111 | LVPVEEEDPAFWNRQAAQAL | Negative |
| P19111 | EDPAFWNRQAAQALDVAKKL | Negative |
| P19111 | PAFWNRQAAQALDVAKKLQP | Negative |
| P19111 | LGLHLQLSLGLVPVEEEDPA | Negative |
| P19111 | VLLLGLHLQLSLGLVPVEE  | Negative |
| P19111 | LHLQLSLGLVPVEEEDPAFW | Negative |
| P19111 | EEDPAFWNRQAAQALDVAKK | Negative |
| P19121 | FIFLFSSATSRNLQRFARDA | Negative |
| P19121 | ISFIFLFSSATSRNLQRFAR | Negative |
| P19121 | FSSATSRNLQRFARDAEHKS | Negative |
| P19121 | LQRFARDAEHKSEIAHRYND | Negative |
| P19121 | LFSSATSRNLQRFARDAEHK | Negative |
| P19121 | LISFIFLFSSATSRNLQRFA | Negative |
| P19121 | AEHKSEIAHRYNDLKEETFK | Negative |
| P19121 | RFARDAEHKSEIAHRYNDLK | Negative |
| P19121 | TLISFIFLFSSATSRNLQRF | Negative |
| P19121 | ARDAEHKSEIAHRYNDLKEE | Negative |
| P19121 | MKWVTLISFIFLFSSATSRN | Negative |
| P19121 | WVTLISFIFLFSSATSRNLQ | Negative |
| P19121 | FARDAEHKSEIAHRYNDLKE | Negative |
| P19121 | FLFSSATSRNLQRFARDAEH | Negative |
| P19121 | SATSRNLQRFARDAEHKSEI | Negative |
| P19121 | QRFARDAEHKSEIAHRYNDL | Negative |
| P19121 | SSATSRNLQRFARDAEHKSE | Negative |
| P19121 | SFIFLFSSATSRNLQRFARD | Negative |
| P19121 | KWVTLISFIFLFSSATSRNL | Negative |
| P19121 | EHKSEIAHRYNDLKEETFKA | Negative |
| P19121 | DAEHKSEIAHRYNDLKEETF | Negative |
| P19121 | IFLFSSATSRNLQRFARDAE | Negative |
| P19121 | NLQRFARDAEHKSEIAHRYN | Negative |
| P19121 | HKSEIAHRYNDLKEETFKAV | Negative |
| P19121 | RNLQRFARDAEHKSEIAHRY | Negative |
| P19121 | RDAEHKSEIAHRYNDLKEET | Negative |
| P19121 | ATSRNLQRFARDAEHKSEIA | Negative |
| P19121 | TSRNLQRFARDAEHKSEIAH | Negative |
| P19121 | SRNLQRFARDAEHKSEIAHR | Negative |
| P19134 | AALGLCLAVTEKTVRWCAVN | Negative |
| P19134 | GLCLAVTEKTVRWCAVNDHE | Negative |
| P19134 | KTVRWCAVNDHEASKCANFR | Negative |

|        |                      |          |
|--------|----------------------|----------|
| P19134 | TEKTVRWCAVNDHEASKCAN | Negative |
| P19134 | CAVNDHEASKCANFRDSMKK | Negative |
| P19134 | ALGLCLAVTEKTVRWCAVND | Negative |
| P19134 | LAAGALLACAALGLCLAVTE | Negative |
| P19134 | VNDHEASKCANFRDSMKKVL | Negative |
| P19134 | EKTVRWCAVNDHEASKCANF | Negative |
| P19134 | CLAVTEKTVRWCAVNDHEAS | Negative |
| P19134 | TVRWCAVNDHEASKCANFRD | Negative |
| P19134 | VTEKTVRWCAVNDHEASKCA | Negative |
| P19134 | CAALGLCLAVTEKTVRWCAV | Negative |
| P19134 | LGLCLAVTEKTVRWCAVNDH | Negative |
| P19134 | LAVTEKTVRWCAVNDHEASK | Negative |
| P19134 | AVNDHEASKCANFRDSMKKV | Negative |
| P19134 | ALLACAALGLCLAVTEKTVR | Negative |
| P19134 | LLACAALGLCLAVTEKTVRW | Negative |
| P19134 | GALLACAALGLCLAVTEKTV | Negative |
| P19134 | RWCAVNDHEASKCANFRDSM | Negative |
| P19134 | RLAAGALLACAALGLCLAVT | Negative |
| P19134 | VRWCAVNDHEASKCANFRDS | Negative |
| P19134 | AVTEKTVRWCAVNDHEASKC | Negative |
| P19134 | MRLAAGALLACAALGLCLAV | Negative |
| P19134 | WCAVNDHEASKCANFRDSMK | Negative |
| P19134 | AAGALLACAALGLCLAVTEK | Negative |
| P19134 | LACAALGLCLAVTEKTVRWC | Negative |
| P19134 | LCLAVTEKTVRWCAVNDHEA | Negative |
| P19134 | ACAALGLCLAVTEKTVRWCA | Negative |
| P19136 | FVALAAITRAAPTAESAVCP | Negative |
| P19136 | GSLLAFVALAAITRAAPTA  | Negative |
| P19136 | ITRAAPTAESAVCPDGTRVT | Negative |
| P19136 | PDGTRVTNAACCAFIPLAQD | Negative |
| P19136 | VCPDGTRVTNAACCAFIPLA | Negative |
| P19136 | AFGSLLAFVALAAITRAAPT | Negative |
| P19136 | APTAESAVCPDGTRVTNAAC | Negative |
| P19136 | AVCPDGTRVTNAACCAFIPL | Negative |
| P19136 | PTAESAVCPDGTRVTNAACC | Negative |
| P19136 | AAPTAESAVCPDGTRVTNA  | Negative |
| P19136 | GTRVTNAACCAFIPLAQDLQ | Negative |
| P19136 | FGSLLAFVALAAITRAAPTA | Negative |
| P19136 | MAFGSLLAFVALAAITRAAP | Negative |
| P19136 | LLAFVALAAITRAAPTAESA | Negative |
| P19136 | AESAVCPDGTRVTNAACCAF | Negative |
| P19136 | SAVCPDGTRVTNAACCAFIP | Negative |
| P19136 | LAFVALAAITRAAPTAESAV | Negative |
| P19136 | RAAPTAESAVCPDGTRVTNA | Negative |
| P19136 | AAITRAAPTAESAVCPDGTR | Negative |
| P19136 | CPDGTRVTNAACCAFIPLAQ | Negative |

|        |                       |          |
|--------|-----------------------|----------|
| P19136 | ESAVCPDGTRVTNAACCAFI  | Negative |
| P19136 | TAESAVCPDGTRVTNAACCA  | Negative |
| P19136 | SLLAFVALAAITRAAPTAES  | Negative |
| P19136 | AITRAAPTAESAVCPDGTRV  | Negative |
| P19136 | LAAITRAAPTAESAVCPDGT  | Negative |
| P19136 | AFVALAAITRAAPTAESAVC  | Negative |
| P19136 | TRAAPTAESAVCPDGTRVTN  | Negative |
| P19136 | ALAAITRAAPTAESAVCPDG  | Negative |
| P19136 | DGTRVTNAACCAFIPLAQDL  | Negative |
| P19137 | FPAILNLATNAHISANATCG  | Negative |
| P19137 | AALLVLLASVLWVTVRSQQR  | Negative |
| P19137 | VLWVTVRSQQRGLFPAILNL  | Negative |
| P19137 | LASVLWVTVRSQQRGLFPAI  | Negative |
| P19137 | RGLFPAILNLATNAHISANA  | Negative |
| P19137 | GAALLVLLASVLWVTVRSQQ  | Negative |
| P19137 | LFPAILNLATNAHISANATC  | Negative |
| P19137 | WVTVRSQQRGLFPAILNLAT  | Negative |
| P19137 | GTGAALLVLLASVLWVTVRS  | Negative |
| P19137 | LVLLASVLWVTVRSQQRGLF  | Negative |
| P19137 | TVRSQQRGLFPAILNLATNA  | Negative |
| P19137 | SQQRGLFPAILNLATNAHIS  | Negative |
| P19137 | VTVRSQQRGLFPAILNLATN  | Negative |
| P19137 | ASVLWVTVRSQQRGLFPAIL  | Negative |
| P19137 | ALLVLLASVLWVTVRSQQRG  | Negative |
| P19137 | GLFPAILNLATNAHISANAT  | Negative |
| P19137 | QQRGLFPAILNLATNAHISA  | Negative |
| P19137 | MRGSGTGAALLVLLASVLWV  | Negative |
| P19137 | QRGLFPAILNLATNAHISAN  | Negative |
| P19137 | LWVTVRSQQRGLFPAILNLA  | Negative |
| P19137 | RSQQRGLFPAILNLATNAHI  | Negative |
| P19137 | LLASVLWVTVRSQQRGLFPA  | Negative |
| P19137 | VLLASVLWVTVRSQQRGLFP  | Negative |
| P19137 | SGTGAALLVLLASVLWVTVR  | Negative |
| P19137 | RSGTGAALLVLLASVLWVT   | Negative |
| P19137 | GSGTGAALLVLLASVLWVTV  | Negative |
| P19137 | VRSQQRGLFPAILNLATNAH  | Negative |
| P19137 | SVLWVTVRSQQRGLFPAILN  | Negative |
| P19137 | TGAALLVLLASVLWVTVRSQ  | Negative |
| P19204 | MKATCWILAGFCLLFCKKAE  | Negative |
| P19204 | ILAGFCLLFCKKAEGLNFP   | Negative |
| P19204 | GKDRVIDLNEKKNYKHALKKY | Negative |
| P19204 | EGLNFPTYDGKDRVIDLNEK  | Negative |
| P19204 | TYDGKDRVIDLNEKKNYKHAL | Negative |
| P19204 | FCKKAEGLNFPTYDGKDRV   | Negative |
| P19204 | CKAEGLNFPTYDGKDRVID   | Negative |
| P19204 | KAEEGLNFPTYDGKDRVIDL  | Negative |

|        |                         |          |
|--------|-------------------------|----------|
| P19204 | WILAGFCLLFCCCKAE EGLNF  | Negative |
| P19204 | YDGKDRVIDLNEK NYKHALK   | Negative |
| P19204 | KATCWILAGFCLLFCCCKAEE   | Negative |
| P19204 | LNFTYDYGKDRVIDLNEK NY   | Negative |
| P19204 | FPTYDYGKDRVIDLNEK NYKH  | Negative |
| P19204 | PTYDYGKDRVIDLNEK NYKHA  | Negative |
| P19204 | LFCCCKAE EGLNFPTYDYGKDR | Negative |
| P19204 | GFCLLFCCCKAE EGLNFPTYD  | Negative |
| P19204 | DGKDRVIDLNEK NYKHALKK   | Negative |
| P19204 | CLLFCCCKAE EGLNFPTYDYGK | Negative |
| P19204 | LLFCCCKAE EGLNFPTYDYGKD | Negative |
| P19204 | TCWILAGFCLLFCCCKAE EGL  | Negative |
| P19204 | GLNFPTYDYGKDRVIDLNEKN   | Negative |
| P19204 | NFTYDYGKDRVIDLNEK NYK   | Negative |
| P19204 | LAGFCLLFCCCKAE EGLNFPT  | Negative |
| P19204 | CCKAE EGLNFPTYDYGKDRVI  | Negative |
| P19204 | E EGLNFPTYDYGKDRVIDLNE  | Negative |
| P19204 | ATCWILAGFCLLFCCCKAEEG   | Negative |
| P19204 | FCLLFCCCKAE EGLNFPTYDYG | Negative |
| P19204 | AE EGLNFPTYDYGKDRVIDLN  | Negative |
| P19204 | AGFCLLFCCCKAE EGLNFPTY  | Negative |
| P19250 | AAFKTFAFELPSVPFPAPGS    | Negative |
| P19250 | TFAFELPSVPFPAPGSDEIL    | Negative |
| P19250 | AFKTFAPFELPSVPFPAPGSD   | Negative |
| P19250 | ELPSVPFPAPGSDEILFVVR    | Negative |
| P19250 | FAKKSFLFISMLAAFKTFAF    | Negative |
| P19250 | KYRYFAKKSFLFISMLAAF     | Negative |
| P19250 | AKKSFLFISMLAAFKTFAFE    | Negative |
| P19250 | MLAAFKTFAFELPSVPFPAP    | Negative |
| P19250 | FKTFAFELPSVPFPAPGSDE    | Negative |
| P19250 | VPFPAPGSDEILFVVRD       | Negative |
| P19250 | SMLAAFKTFAFELPSVPFPA    | Negative |
| P19250 | KKSFLFISMLAAFKTFAFEL    | Negative |
| P19250 | MKYRYFAKKSFLFISMLAAF    | Negative |
| P19250 | PSVPFPAPGSDEILFVVRD     | Negative |
| P19250 | LFISMLAAFKTFAFELPSVP    | Negative |
| P19250 | FAFELPSVPFPAPGSDEILF    | Negative |
| P19250 | AFELPSVPFPAPGSDEILFV    | Negative |
| P19250 | KSFLFISMLAAFKTFAFELP    | Negative |
| P19250 | LPSVPFPAPGSDEILFVVRD    | Negative |
| P19250 | FLFISMLAAFKTFAFELPSV    | Negative |
| P19250 | YFAKKSFLFISMLAAFKTFA    | Negative |
| P19250 | LAAFKTFAFELPSVPFPAPG    | Negative |
| P19250 | KTFAFELPSVPFPAPGSDEI    | Negative |
| P19250 | ISMLAAFKTFAFELPSVPFP    | Negative |
| P19250 | RYFAKKSFLFISMLAAFKT     | Negative |

|        |                       |          |
|--------|-----------------------|----------|
| P19250 | YRYFAKKSFLFISMLAAFKT  | Negative |
| P19250 | SVPFPAPGSDEILFVVRDTT  | Negative |
| P19250 | FELPSVPFPAPGSDEILFVV  | Negative |
| P19250 | FISMLAAFKTFAFELPSVPF  | Negative |
| P19313 | MRLCPVLGHFLGGIEKSSME  | Negative |
| P19313 | NMRLCPVLGHFLGGIEKSSM  | Negative |
| P19313 | CPVLGHFLGGIEKSSMEEEG  | Negative |
| P19313 | TFILVLNMRLCPVLGHFLGG  | Negative |
| P19313 | HAQLFLLTTFILVLNMRLCP  | Negative |
| P19313 | RLCPVLGHFLGGIEKSSMEE  | Negative |
| P19313 | QLFLLTTFILVLNMRLCPVL  | Negative |
| P19313 | AYLLHAQLFLLTTFILVLNM  | Negative |
| P19313 | LGHFLGGIEKSSMEEEGASE  | Negative |
| P19313 | LTTFILVLNMRLCPVLGHFL  | Negative |
| P19313 | MAYLLHAQLFLLTTFILVLN  | Negative |
| P19313 | FLLTTFILVLNMRLCPVLGH  | Negative |
| P19313 | LNMRCPVLGHFLGGIEKSS   | Negative |
| P19313 | AQLFLLTTFILVLNMRLCPV  | Negative |
| P19313 | PVLGHFLGGIEKSSMEEEGA  | Negative |
| P19313 | GHFLGGIEKSSMEEEGASEA  | Negative |
| P19313 | LFLLTTFILVLNMRLCPVLG  | Negative |
| P19313 | ILVLNMRLCPVLGHFLGGIE  | Negative |
| P19313 | LLTTFILVLNMRLCPVLGHF  | Negative |
| P19313 | LVLNMRLCPVLGHFLGGIEK  | Negative |
| P19313 | VLGHFLGGIEKSSMEEEGAS  | Negative |
| P19313 | LCPVLGHFLGGIEKSSMEEE  | Negative |
| P19313 | FLGGIEKSSMEEEGASEALN  | Negative |
| P19313 | FILVLNMRLCPVLGHFLGGI  | Negative |
| P19313 | YLLHAQLFLLTTFILVLNMR  | Negative |
| P19313 | VLNMRLCPVLGHFLGGIEKS  | Negative |
| P19313 | LHAQLFLLTTFILVLNMRLC  | Negative |
| P19313 | LLHAQLFLLTTFILVLNMRL  | Negative |
| P19313 | HFLGGIEKSSMEEEGASEAL  | Negative |
| P19329 | SNDA SFNVETFNKTNLILQG | Negative |
| P19329 | FLVLLTHANSSNDASFNvet  | Negative |
| P19329 | SSNLLTLALFLVLLTHANSS  | Negative |
| P19329 | LLTHANSSNDASFNvetFNK  | Negative |
| P19329 | NVETFNKTNLILQG DATVSS | Negative |
| P19329 | MASSNLLTLALFLVLLTHAN  | Negative |
| P19329 | FNvetFNKTNLILQG DATVS | Negative |
| P19329 | SSNDASFNvetFNKTNLILQ  | Negative |
| P19329 | ANSSNDASFNvetFNKTNLI  | Negative |
| P19329 | SNLLTLALFLVLLTHANSSN  | Negative |
| P19329 | THANSSNDASFNvetFNKTN  | Negative |
| P19329 | SFNvetFNKTNLILQG DATV | Negative |
| P19329 | HANSSNDASFNvetFNKTNL  | Negative |

|        |                      |          |
|--------|----------------------|----------|
| P19329 | NSSNDASFNVETFNKTNLIL | Negative |
| P19329 | DASFNVETFNKTNLILQGDA | Negative |
| P19329 | LTHANSSNDASFNVETFNKT | Negative |
| P19329 | VLLTHANSSNDASFNVETFN | Negative |
| P19329 | TLALFLVLLTHANSSNDASF | Negative |
| P19329 | ASFNVETFNKTNLILQGDAT | Negative |
| P19329 | LVLLTHANSSNDASFNVETF | Negative |
| P19329 | VETFNKTNLILQGDATVSSE | Negative |
| P19329 | NLLTLALFLVLLTHANSSND | Negative |
| P19329 | LFLVLLTHANSSNDASFNVE | Negative |
| P19329 | ETFNKTNLILQGDATVSSEG | Negative |
| P19329 | ASSNLLTLALFLVLLTHANS | Negative |
| P19329 | NDASFNVETFNKTNLILQGD | Negative |
| P19329 | LLTLALFLVLLTHANSSNDA | Negative |
| P19329 | LALFLVLLTHANSSNDASFN | Negative |
| P19329 | ALFLVLLTHANSSNDASFNV | Negative |
| P19369 | GAAHAEGGIAEAAGKALDSA | Negative |
| P19369 | AEAAGKALDSAQSDVTITAP | Negative |
| P19369 | HAEGGIAEAAGKALDSAQSD | Negative |
| P19369 | NFFRNGCIALVGSVAAMGAA | Negative |
| P19369 | AHAEGGIAEAAGKALDSAQS | Negative |
| P19369 | GIAEAAGKALDSAQSDVTIT | Negative |
| P19369 | RNGCIALVGSVAAMGAAHAE | Negative |
| P19369 | GCIALVGSVAAMGAAHAEGG | Negative |
| P19369 | VAAMGAAHAEGGIAEAAGKA | Negative |
| P19369 | EGGIAEAAGKALDSAQSDVT | Negative |
| P19369 | EAAGKALDSAQSDVTITAPK | Negative |
| P19369 | PNFFRNGCIALVGSVAAMGA | Negative |
| P19369 | AAMGAAHAEGGIAEAAGKAL | Negative |
| P19369 | SVAAMGAAHAEGGIAEAAGK | Negative |
| P19369 | GGIAEAAGKALDSAQSDVTI | Negative |
| P19369 | AAHAEGGIAEAAGKALDSAQ | Negative |
| P19369 | NGCIALVGSVAAMGAAHAEG | Negative |
| P19369 | AEGGIAEAAGKALDSAQSDV | Negative |
| P19369 | GSVAAMGAAHAEGGIAEAAG | Negative |
| P19369 | LVGSVAAMGAAHAEGGIAEA | Negative |
| P19369 | MGAHAEGGIAEAAGKALDS  | Negative |
| P19369 | IAEAAGKALDSAQSDVTITA | Negative |
| P19369 | MPNFFRNGCIALVGSVAAMG | Negative |
| P19369 | FRNGCIALVGSVAAMGAAHA | Negative |
| P19369 | FFRNGCIALVGSVAAMGAAH | Negative |
| P19369 | VGSVAAMGAAHAEGGIAEAA | Negative |
| P19369 | ALVGSVAAMGAAHAEGGIAE | Negative |
| P19369 | AMGAAHAEGGIAEAAGKALD | Negative |
| P19369 | CIALVGSVAAMGAAHAEGGI | Negative |
| P19400 | GPFICTVKDNQVFVANLPWT | Negative |

|        |                      |          |
|--------|----------------------|----------|
| P19400 | LWTSSIAYSQFLFSMSTGPF | Negative |
| P19400 | PFICTVKDNQVFVANLPWTM | Negative |
| P19400 | VWLILSLASLWTSSIAYSQF | Negative |
| P19400 | IAYSQFLFSMSTGPFICTVK | Negative |
| P19400 | TGPFICTVKDNQVFVANLPW | Negative |
| P19400 | QFLFSMSTGPFICTVKDNQV | Negative |
| P19400 | LASLWTSSIAYSQFLFSMST | Negative |
| P19400 | STGPFICTVKDNQVFVANLP | Negative |
| P19400 | FLFSMSTGPFICTVKDNQVF | Negative |
| P19400 | WTSSIAYSQFLFSMSTGPF  | Negative |
| P19400 | AYSQFLFSMSTGPFICTVKD | Negative |
| P19400 | TSSIAYSQFLFSMSTGPFIC | Negative |
| P19400 | SIAYSQFLFSMSTGPFICTV | Negative |
| P19400 | LSLASLWTSSIAYSQFLFSM | Negative |
| P19400 | LFSMSTGPFICTVKDNQVFV | Negative |
| P19400 | SMSTGPFICTVKDNQVFVAN | Negative |
| P19400 | SSIAYSQFLFSMSTGPFICT | Negative |
| P19400 | WLILSLASLWTSSIAYSQFL | Negative |
| P19400 | SLASLWTSSIAYSQFLFSMS | Negative |
| P19400 | MSTGPFICTVKDNQVFVANL | Negative |
| P19400 | SQFLFSMSTGPFICTVKDNQ | Negative |
| P19400 | ASLWTSSIAYSQFLFSMSTG | Negative |
| P19400 | LILSLASLWTSSIAYSQFLF | Negative |
| P19400 | HVWLILSLASLWTSSIAYSQ | Negative |
| P19400 | MHVWLILSLASLWTSSIAYS | Negative |
| P19400 | FSMSTGPFICTVKDNQVFVA | Negative |
| P19400 | YSQFLFSMSTGPFICTVKDN | Negative |
| P19400 | SLWTSSIAYSQFLFSMSTGP | Negative |
| P19401 | AKNTTNRHYSLRKLKTGTAS | Negative |
| P19401 | NRHYSLRKLKTGTASVAVAL | Negative |
| P19401 | VGAGLVAGQTVRADHSDLVA | Negative |
| P19401 | KNTTNRHYSLRKLKTGTASV | Negative |
| P19401 | SVAVALTVVGAGLVAGQTVR | Negative |
| P19401 | LKTGTASVAVALTVVGAGLV | Negative |
| P19401 | AVALTVVGAGLVAGQTVRAD | Negative |
| P19401 | RKLKTGTASVAVALTVVGAG | Negative |
| P19401 | YSLRKLKTGTASVAVALTVV | Negative |
| P19401 | KLKTGTASVAVALTVVGAGL | Negative |
| P19401 | VAVALTVVGAGLVAGQTVRA | Negative |
| P19401 | KTGTASVAVALTVVGAGLVA | Negative |
| P19401 | LTVGAGLVAGQTVRADHSD  | Negative |
| P19401 | ASVAVALTVVGAGLVAGQTV | Negative |
| P19401 | NTTNRHYSLRKLKTGTASVA | Negative |
| P19401 | SLRKLKTGTASVAVALTVVG | Negative |
| P19401 | MAKNTTNRHYSLRKLKTGTA | Negative |
| P19401 | ALTVVGAGLVAGQTVRADHS | Negative |

|        |                      |          |
|--------|----------------------|----------|
| P19401 | HYSLRKLKTGTASVAVALTV | Negative |
| P19401 | TASVAVALTVVGAGLVAGQT | Negative |
| P19401 | RHYSLRKLKTGTASVAVALT | Negative |
| P19401 | LRKLKTGTASVAVALTVVGA | Negative |
| P19401 | GAGLVAGQTVRADHSDLVAE | Negative |
| P19401 | VALTVVGAGLVAGQTVRADH | Negative |
| P19401 | VVGAGLVAGQTVRADHSDLV | Negative |
| P19401 | TNRHYSLRKLKTGTASVAVA | Negative |
| P19401 | TGTASVAVALTVVGAGLVAG | Negative |
| P19401 | GTASVAVALTVVGAGLVAGQ | Negative |
| P19401 | TTNRHYSLRKLKTGTASVAV | Negative |
| P19405 | IAVLSSIAFSSLASGSVPEA | Negative |
| P19405 | PKKLLPIAVLSSIAFSSLAS | Negative |
| P19405 | ASGSVPEASAEKKGKNQDE  | Negative |
| P19405 | VPEASAEKKGKNQDEIKNV  | Negative |
| P19405 | SLASGSVPEASAEKKGKNQ  | Negative |
| P19405 | KFPKKLLPIAVLSSIAFSSL | Negative |
| P19405 | FPKKLLPIAVLSSIAFSSLA | Negative |
| P19405 | LPIAVLSSIAFSSLASGSVP | Negative |
| P19405 | KKLLPIAVLSSIAFSSLASG | Negative |
| P19405 | KLLPIAVLSSIAFSSLASGS | Negative |
| P19405 | SVPEASAEKKGKNQDEIKN  | Negative |
| P19405 | EASAEKKGKNQDEIKNVIV  | Negative |
| P19405 | MKKFPKKLLPIAVLSSIAFS | Negative |
| P19405 | KKFPKKLLPIAVLSSIAFSS | Negative |
| P19405 | IAFSSLASGSVPEASAEKK  | Negative |
| P19405 | LASGSVPEASAEKKGKNQD  | Negative |
| P19405 | FSSLASGSVPEASAEKKGK  | Negative |
| P19405 | SIAFSSLASGSVPEASAEK  | Negative |
| P19405 | ASAEKKGKNQDEIKNVIVL  | Negative |
| P19405 | PIAVLSSIAFSSLASGSVPE | Negative |
| P19405 | VLSSIAFSSLASGSVPEASA | Negative |
| P19405 | LSSIAFSSLASGSVPEASQ  | Negative |
| P19405 | AVLSSIAFSSLASGSVPEAS | Negative |
| P19405 | SSLASGSVPEASAEKKGKN  | Negative |
| P19405 | GSVPEASAEKKGKNQDEIK  | Negative |
| P19405 | PEASAEKKGKNQDEIKNVI  | Negative |
| P19405 | SGSVPEASAEKKGKNQDEI  | Negative |
| P19405 | LLPIAVLSSIAFSSLASGSV | Negative |
| P19405 | SSIAFSSLASGSVPEASAE  | Negative |
| P19406 | TAGIFAGAEQQTEKASAKK  | Negative |
| P19406 | MKKMSLFQNMKSKLLPIAAV | Negative |
| P19406 | LPIAAVSVLTAGIFAGAEQ  | Negative |
| P19406 | AVSVLTAGIFAGAEQQTEK  | Negative |
| P19406 | LTAGIFAGAEQQTEKASAK  | Negative |
| P19406 | LFQNMKSKLLPIAAVSVLTA | Negative |



|        |                       |          |
|--------|-----------------------|----------|
| P19406 | MSLFQNMKSKLLPIAAVSVL  | Negative |
| P19406 | GAELQQTEKASAKKQDKAEI  | Negative |
| P19406 | KMSLFQNMKSKLLPIAAVSV  | Negative |
| P19406 | PIAAVSVLTAGIFAGAELQQ  | Negative |
| P19406 | LLPIAAVSVLTAGIFAGAEL  | Negative |
| P19406 | KSKLLPIAAVSVLTAGIFAG  | Negative |
| P19406 | AAVSVLTAGIFAGAELQQTE  | Negative |
| P19406 | QNMKSKLLPIAAVSVLTAGI  | Negative |
| P19406 | MKSKLLPIAAVSVLTAGIFA  | Negative |
| P19406 | KLLPIAAVSVLTAGIFAGAE  | Negative |
| P19406 | KKMSLFQNMKSKLLPIAAVS  | Negative |
| P19406 | IAAVSVLTAGIFAGAELQQT  | Negative |
| P19406 | SKLLPIAAVSVLTAGIFAGA  | Negative |
| P19406 | NMKSKLLPIAAVSVLTAGIF  | Negative |
| P19406 | AGAELQQTEKASAKKQDKAE  | Negative |
| P19406 | SVLTAGIFAGAELQQTEKAS  | Negative |
| P19406 | FAGAELQQTEKASAKKQDKA  | Negative |
| P19406 | VSVLTAGIFAGAELQQTEKA  | Negative |
| P19406 | SLFQNMKSKLLPIAAVSVLT  | Negative |
| P19406 | VLTAGIFAGAELQQTEKASA  | Negative |
| P19406 | AGIFAGAELQQTEKASAKKQ  | Negative |
| P19406 | GIFAGAELQQTEKASAKKQD  | Negative |
| P19406 | FQNMKSKLLPIAAVSVLTAG  | Negative |
| P19425 | LADYPAPPPPPPKPYHAPPP  | Negative |
| P19425 | ADYPAPPPPPPKPYHAPPPP  | Negative |
| P19425 | PAPPPPPPKPYHAPPPPPYH  | Negative |
| P19425 | PKPYHAPPPPPYHAPPHHAP  | Negative |
| P19425 | KPYHAPPPPPYHAPPHHAPA  | Negative |
| P19425 | AALVLFTAVIGALADYPAPP  | Negative |
| P19425 | VLFTAVIGALADYPAPPPPP  | Negative |
| P19425 | ALADYPAPPPPPPKPYHAPP  | Negative |
| P19425 | KIIAALVLFTAVIGALADYP  | Negative |
| P19425 | MNKIIAALVLFTAVIGALAD  | Negative |
| P19425 | TAVIGALADYPAPPPPPPKP  | Negative |
| P19425 | IGALADYPAPPPPPPKPYHA  | Negative |
| P19425 | PPPPPPPKPYHAPPPPPYHAP | Negative |
| P19425 | IIAALVLFTAVIGALADYPA  | Negative |
| P19425 | ALVLFTAVIGALADYPAPPP  | Negative |
| P19425 | NKIIAALVLFTAVIGALADY  | Negative |
| P19425 | DYPAPPPPPPKPYHAPPPPP  | Negative |
| P19425 | PPPPPKPYHAPPPPPYHAPP  | Negative |
| P19425 | VIGALADYPAPPPPPPKPYH  | Negative |
| P19425 | APPPPPPKPYHAPPPPPYHA  | Negative |
| P19425 | PPPKPYHAPPPPPYHAPPHH  | Negative |
| P19425 | FTAVIGALADYPAPPPPPPK  | Negative |
| P19425 | PPPPPKPYHAPPPPPYHAPPH | Negative |

|        |                       |          |
|--------|-----------------------|----------|
| P19425 | YPAPPPPPPKPYHAPPPPPY  | Negative |
| P19425 | AVIGALADYPAPPPPPPKPY  | Negative |
| P19425 | PPKPYHAPPPPPYHAPPHA   | Negative |
| P19425 | LFTAVIGALADYPAPPPPPP  | Negative |
| P19425 | GALADYPAPPPPPPKPYHAP  | Negative |
| P19425 | LVLFTAVIGALADYPAPPPP  | Negative |
| P19427 | LVTVAWGQYGDYGYSHQYH   | Negative |
| P19427 | QYGDYGYSHQYHDYSDDGW   | Negative |
| P19427 | LPLVTVAWGQYGDYGYSHQ   | Negative |
| P19427 | QYHDYSDDGWVNLNRQGFSY  | Negative |
| P19427 | LTLLWVLLPLVTVAWGQYGD  | Negative |
| P19427 | DLTLLWVLLPLVTVAWGQYG  | Negative |
| P19427 | YGDYGYSHQYHDYSDDGWV   | Negative |
| P19427 | VLLPLVTVAWGQYGDYGYSH  | Negative |
| P19427 | SYHQYHDYSDDGWVNLNRQG  | Negative |
| P19427 | MDLTLLWVLLPLVTVAWGQY  | Negative |
| P19427 | YHQYHDYSDDGWVNLNRQGF  | Negative |
| P19427 | GDYGYSHQYHDYSDDGWVN   | Negative |
| P19427 | DYGYSHQYHDYSDDGWVNL   | Negative |
| P19427 | YHDYSDDGWVNLNRQGFSYQ  | Negative |
| P19427 | TVAWGQYGDYGYSHQYHDY   | Negative |
| P19427 | YSYHQYHDYSDDGWVNLNRQ  | Negative |
| P19427 | WVLLPLVTVAWGQYGDYGYSH | Negative |
| P19427 | HQYHDYSDDGWVNLNRQGFS  | Negative |
| P19427 | PLVTVAWGQYGDYGYSHQY   | Negative |
| P19427 | VAWGQYGDYGYSHQYHDYS   | Negative |
| P19427 | YGYSHQYHDYSDDGWVNLN   | Negative |
| P19427 | LLPLVTVAWGQYGDYGYSH   | Negative |
| P19427 | LLWVLLPLVTVAWGQYGDYG  | Negative |
| P19427 | AWGQYGDYGYSHQYHDYSD   | Negative |
| P19427 | GQYGDYGYSHQYHDYSDDG   | Negative |
| P19427 | VTVAWGQYGDYGYSHQYHD   | Negative |
| P19427 | GYSYHQYHDYSDDGWVNLNR  | Negative |
| P19427 | WGQYGDYGYSHQYHDYSDD   | Negative |
| P19427 | LWVLLPLVTVAWGQYGDYGY  | Negative |
| P19487 | PAFSYSINNSRQIVDDSGKV  | Negative |
| P19487 | AFSYSINNSRQIVDDSGKV   | Negative |
| P19487 | ALALAAGPAFSYSINNSRQI  | Negative |
| P19487 | TALALAAGPAFSYSINNSRQ  | Negative |
| P19487 | FRTASTLALATALALAAGPA  | Negative |
| P19487 | TASTLALATALALAAGPAFS  | Negative |
| P19487 | LATALALAAGPAFSYSINNS  | Negative |
| P19487 | YSINNSRQIVDDSGKVQLK   | Negative |
| P19487 | ATALALAAGPAFSYSINNSR  | Negative |
| P19487 | SINNSRQIVDDSGKVQLKG   | Negative |
| P19487 | NSRQIVDDSGKVQLKGVNV   | Negative |

|        |                      |          |
|--------|----------------------|----------|
| P19487 | TLALATALALAAGPAFSYSI | Negative |
| P19487 | ALAAGPAFSYSINNSRQIVD | Negative |
| P19487 | IFRTASTLALATALALAAGP | Negative |
| P19487 | AAGPAFSYSINNSRQIVDDS | Negative |
| P19487 | ASTLALATALALAAGPAFSY | Negative |
| P19487 | RTASTLALATALALAAGPAF | Negative |
| P19487 | NNSRQIVDDSGKVVQLKGVN | Negative |
| P19487 | STLALATALALAAGPAFSYS | Negative |
| P19487 | LAAGPAFSYSINNSRQIVDD | Negative |
| P19487 | SYSINNSRQIVDDSGKVVQL | Negative |
| P19487 | GPAFSYSINNSRQIVDDSGK | Negative |
| P19487 | SIFRTASTLALATALALAAG | Negative |
| P19487 | FSYSINNSRQIVDDSGKVVQ | Negative |
| P19487 | LALAAGPAFSYSINNSRQIV | Negative |
| P19487 | LALATALALAAGPAFSYSIN | Negative |
| P19487 | INNSRQIVDDSGKVVQLKGV | Negative |
| P19487 | MSIFRTASTLALATALALAA | Negative |
| P19487 | AGPAFSYSINNSRQIVDDSG | Negative |
| P19531 | TLSLFVGLMLLIGLLFSGSL | Negative |
| P19531 | VGLMLLIGLLFSGSLPYNPN | Negative |
| P19531 | PYNPNAAEASSSASVKGDVI | Negative |
| P19531 | GLLFSGSLPYNPNAAEASSS | Negative |
| P19531 | KKTLSLFVGLMLLIGLLFSG | Negative |
| P19531 | SGSLPYNPNAAEASSSASVK | Negative |
| P19531 | GSLPYNPNAAEASSSASVKG | Negative |
| P19531 | LSLFVGLMLLIGLLFSGSLP | Negative |
| P19531 | GLMLLIGLLFSGSLPYNPNA | Negative |
| P19531 | FVGLMLLIGLLFSGSLPYNP | Negative |
| P19531 | LLIGLLFSGSLPYNPNAAEA | Negative |
| P19531 | PNAAEASSSASVKGDVIYQI | Negative |
| P19531 | NAAEASSSASVKGDVIYQII | Negative |
| P19531 | LPYNPNAAEASSSASVKGDV | Negative |
| P19531 | MLLIGLLFSGSLPYNPNAAE | Negative |
| P19531 | KKKTLSLFVGLMLLIGLLFS | Negative |
| P19531 | YNPNAAEASSSASVKGDVIY | Negative |
| P19531 | KTLSLFVGLMLLIGLLFSGS | Negative |
| P19531 | SLFVGLMLLIGLLFSGSLPY | Negative |
| P19531 | LFVGLMLLIGLLFSGSLPYN | Negative |
| P19531 | LLFSGSLPYNPNAAEASSSA | Negative |
| P19531 | AAEASSSASVKGDVIYQIII | Negative |
| P19531 | IGLLFSGSLPYNPNAAEASS | Negative |
| P19531 | LIGLLFSGSLPYNPNAAEAS | Negative |
| P19531 | NPNAAEASSSASVKGDVIYQ | Negative |
| P19531 | SLPYNPNAAEASSSASVKGD | Negative |
| P19531 | FSGSLPYNPNAAEASSSASV | Negative |
| P19531 | MKKKTLSLFVGLMLLIGLLF | Negative |

|        |                      |          |
|--------|----------------------|----------|
| P19531 | LMLLIGLLFSGSLPYNPNAA | Negative |
| P19567 | LNAIKSGFGIAIAAMLVAAP | Negative |
| P19567 | VAAPAAAADFEVHMLNKGKD | Negative |
| P19567 | PAAAADFEVHMLNKGKDGAM | Negative |
| P19567 | TMLNAIKSGFGIAIAAMLVA | Negative |
| P19567 | MLNAIKSGFGIAIAAMLVAA | Negative |
| P19567 | AAPAAAADFEVHMLNKGKDG | Negative |
| P19567 | LVAAPAAAADFEVHMLNKGK | Negative |
| P19567 | KSGFGIAIAAMLVAAPAAAA | Negative |
| P19567 | AIAAMLVAAPAAAADFEVHM | Negative |
| P19567 | AAADFEVHMLNKGKDGAMVF | Negative |
| P19567 | IAIAAMLVAAPAAAADFEVH | Negative |
| P19567 | APAAAADFEVHMLNKGKDGA | Negative |
| P19567 | AAAADFEVHMLNKGKDGAMV | Negative |
| P19567 | AADFEVHMLNKGKDGAMVFE | Negative |
| P19567 | DFEVHMLNKGKDGAMVFEP  | Negative |
| P19567 | AIKSGFGIAIAAMLVAAPAA | Negative |
| P19567 | GFGIAIAAMLVAAPAAAADF | Negative |
| P19567 | EKTMLNAIKSGFGIAIAAML | Negative |
| P19567 | MLVAAPAAAADFEVHMLNKG | Negative |
| P19567 | MEKTMLNAIKSGFGIAIAAM | Negative |
| P19567 | KTMLNAIKSGFGIAIAAMLV | Negative |
| P19567 | IAAMLVAAPAAAADFEVHML | Negative |
| P19567 | FGIAIAAMLVAAPAAAADFE | Negative |
| P19567 | NAIKSGFGIAIAAMLVAAPA | Negative |
| P19567 | SGFGIAIAAMLVAAPAAAAD | Negative |
| P19567 | AAMLVAAPAAAADFEVHMLN | Negative |
| P19567 | IKSGFGIAIAAMLVAAPAAA | Negative |
| P19567 | AMLVAAPAAAADFEVHMLNK | Negative |
| P19567 | ADFEVHMLNKGKDGAMVFEP | Negative |
| P19571 | SIPFTLVDVEAHHNGTNGTM | Negative |
| P19571 | VDVEAHHNGTNGTMMQYFEW | Negative |
| P19571 | KGFLSILLAFLLVITSIPFT | Negative |
| P19571 | TLVDVEAHHNGTNGTMMQYF | Negative |
| P19571 | TGKKGFLSILLAFLLVITSI | Negative |
| P19571 | TSIPFTLVDVEAHHNGTNGT | Negative |
| P19571 | LSILLAFLLVITSIPFTLVD | Negative |
| P19571 | LAFLLVITSIPFTLVDVEAH | Negative |
| P19571 | MKMRTGKKGFLSILLAFLLV | Negative |
| P19571 | KMRTGKKGFLSILLAFLLV  | Negative |
| P19571 | FLSILLAFLLVITSIPFTLV | Negative |
| P19571 | FTLVDVEAHHNGTNGTMMQY | Negative |
| P19571 | GFLSILLAFLLVITSIPFTL | Negative |
| P19571 | IPFTLVDVEAHHNGTNGTMM | Negative |
| P19571 | FLLVITSIPFTLVDVEAHHN | Negative |
| P19571 | PFTLVDVEAHHNGTNGTMMQ | Negative |

|        |                      |          |
|--------|----------------------|----------|
| P19571 | DVEAHHNGTNGTMMQYFEWY | Negative |
| P19571 | MRTGKKGFLSILLAFLLVIT | Negative |
| P19571 | AFLLVITSIPFTLVDVEAHH | Negative |
| P19571 | SILLAFLLVITSIPFTLVDV | Negative |
| P19571 | VITSIPFTLVDVEAHHNGTN | Negative |
| P19571 | GKKGFLSILLAFLLVITSIP | Negative |
| P19571 | RTGKKGFLSILLAFLLVITS | Negative |
| P19571 | ILLAFLLVITSIPFTLVDVE | Negative |
| P19571 | LLAFLLVITSIPFTLVDVEA | Negative |
| P19571 | LLVITSIPFTLVDVEAHHNG | Negative |
| P19571 | ITSIPFTLVDVEAHHNGTNG | Negative |
| P19571 | LVDVEAHHNGTNGTMMQYFE | Negative |
| P19571 | KKGFLSILLAFLLVITSIPF | Negative |
| P19584 | LGQKLFLTLLTASLIFASSI | Negative |
| P19584 | QKLFLTLLTASLIFASSIVT | Negative |
| P19584 | FLTLLTASLIFASSIVTANA | Negative |
| P19584 | TANASIAPNFKVFVMGPLEK | Negative |
| P19584 | SIVTANASIAPNFKVFVMGP | Negative |
| P19584 | FKRLGQKLFLTLLTASLIFA | Negative |
| P19584 | KLFLTLLTASLIFASSIVTA | Negative |
| P19584 | GAFKRLGQKLFLTLLTASLI | Negative |
| P19584 | LTASLIFASSIVTANASIAP | Negative |
| P19584 | KRLGQKLFLTLLTASLIFAS | Negative |
| P19584 | AFKRLGQKLFLTLLTASLIF | Negative |
| P19584 | VTANASIAPNFKVFVMGPLE | Negative |
| P19584 | GQKLFLTLLTASLIFASSIV | Negative |
| P19584 | FASSIVTANASIAPNFKVFV | Negative |
| P19584 | IVTANASIAPNFKVFVMGPL | Negative |
| P19584 | LFLTLLTASLIFASSIVTAN | Negative |
| P19584 | ASLIFASSIVTANASIAPNF | Negative |
| P19584 | IGAFKRLGQKLFLTLLTASL | Negative |
| P19584 | ASSIVTANASIAPNFKVFVM | Negative |
| P19584 | MIGAFKRLGQKLFLTLLTAS | Negative |
| P19584 | TLLTASLIFASSIVTANASI | Negative |
| P19584 | ANASIAPNFKVFVMGPLEKV | Negative |
| P19584 | RLGQKLFLTLLTASLIFASS | Negative |
| P19584 | LTLLTASLIFASSIVTANAS | Negative |
| P19584 | LLTASLIFASSIVTANASIA | Negative |
| P19584 | IFASSIVTANASIAPNFKVF | Negative |
| P19584 | LIFASSIVTANASIAPNFKV | Negative |
| P19584 | SSIVTANASIAPNFKVFVMG | Negative |
| P19584 | SLIFASSIVTANASIAPNFK | Negative |
| P19594 | LFCIAHTCSASKWQHQQDSC | Negative |
| P19594 | SCRKQLQGVNLTPCEKHIME | Negative |
| P19594 | TILLISLLFCIAHTCSASKW | Negative |
| P19594 | FTILLISLLFCIAHTCSASK | Negative |

|        |                       |          |
|--------|-----------------------|----------|
| P19594 | CSASKWQHQQDSCRKQLQGV  | Negative |
| P19594 | AHTCSASKWQHQQDSCRKQL  | Negative |
| P19594 | KFTILLISLLFCIAHTCSAS  | Negative |
| P19594 | QHQQDSCRKQLQGVNLTPCE  | Negative |
| P19594 | DSCRKQLQGVNLTPCEKHIM  | Negative |
| P19594 | FCIAHTCSASKWQHQQDSCR  | Negative |
| P19594 | ASKWQHQQDSCRKQLQGVNL  | Negative |
| P19594 | ISLLFCIAHTCSASKWQHQQ  | Negative |
| P19594 | WQHQQDSCRKQLQGVNLTPC  | Negative |
| P19594 | IAHTCSASKWQHQQDSCRKQ  | Negative |
| P19594 | KWQHQQDSCRKQLQGVNLTP  | Negative |
| P19594 | HTCSASKWQHQQDSCRKQLQ  | Negative |
| P19594 | SASKWQHQQDSCRKQLQGVN  | Negative |
| P19594 | CIAHTCSASKWQHQQDSCRK  | Negative |
| P19594 | SLLFCIAHTCSASKWQHQQD  | Negative |
| P19594 | MTKFTILLISLLFCIAHTCS  | Negative |
| P19594 | SKWQHQQDSCRKQLQGVNLTP | Negative |
| P19594 | QDSCRKQLQGVNLTPCEKHI  | Negative |
| P19594 | TKFTILLISLLFCIAHTCSA  | Negative |
| P19594 | ILLISLLFCIAHTCSASKWQ  | Negative |
| P19594 | TCSASKWQHQQDSCRKQLQG  | Negative |
| P19594 | LLFCIAHTCSASKWQHQQDS  | Negative |
| P19594 | HQQDSCRKQLQGVNLTPCEK  | Negative |
| P19594 | LISLLFCIAHTCSASKWQHQQ | Negative |
| P19594 | QQDSCRKQLQGVNLTPCEKH  | Negative |
| P19656 | EAAISCGQVASAIAPCISYA  | Negative |
| P19656 | QQLAVVATAVVALVLLAAAT  | Negative |
| P19656 | AAATSEAAISCGQVASAIAP  | Negative |
| P19656 | ALVLLAAATSEAAISCGQVA  | Negative |
| P19656 | TSEAAISCGQVASAIAPCIS  | Negative |
| P19656 | TAVVALVLLAAATSEAAISC  | Negative |
| P19656 | AAISCGQVASAIAPCISYAR  | Negative |
| P19656 | MARTQQLAVVATAVVALVLL  | Negative |
| P19656 | QLAVVATAVVALVLLAAATS  | Negative |
| P19656 | SCGQVASAIAPCISYARGQG  | Negative |
| P19656 | VLLAAATSEAAISCGQVASA  | Negative |
| P19656 | ARTQQLAVVATAVVALVLLA  | Negative |
| P19656 | LAVVATAVVALVLLAAATSE  | Negative |
| P19656 | VVALVLLAAATSEAAISCGQ  | Negative |
| P19656 | TQQLAVVATAVVALVLLAAA  | Negative |
| P19656 | AISCGQVASAIAPCISYARG  | Negative |
| P19656 | ATSEAAISCGQVASAIAPCI  | Negative |
| P19656 | AATSEAAISCGQVASAIAPC  | Negative |
| P19656 | VVATAVVALVLLAAATSEAA  | Negative |
| P19656 | VATAVVALVLLAAATSEAAI  | Negative |
| P19656 | ATAVVALVLLAAATSEAAIS  | Negative |

|        |                      |          |
|--------|----------------------|----------|
| P19656 | LLAAATSEAAISCGQVASAI | Negative |
| P19656 | RTQQLAVVATAVVALVLLAA | Negative |
| P19656 | LAAATSEAAISCGQVASAIA | Negative |
| P19656 | AVVATAVVALVLLAAATSEA | Negative |
| P19656 | LVLLAAATSEAAISCGQVAS | Negative |
| P19656 | VALVLLAAATSEAAISCGQV | Negative |
| P19656 | ISCGQVASAIAPCISYARGQ | Negative |
| P19656 | SEAAISCGQVASAIAPCISY | Negative |
| P19667 | VLLSGQTLHADHSLQAGAYT | Negative |
| P19667 | LLSGQTLHADHSLQAGAYTL | Negative |
| P19667 | AAKFLTILVTFAAVASLGM  | Negative |
| P19667 | VASLGMADNVLLSGQTLHAD | Negative |
| P19667 | GMADNVLLSGQTLHADHSLQ | Negative |
| P19667 | FLLTILVTFAAVASLGMADN | Negative |
| P19667 | SGQTLHADHSLQAGAYTLTI | Negative |
| P19667 | TFAAVASLGMADNVLLSGQT | Negative |
| P19667 | NVLLSGQTLHADHSLQAGAY | Negative |
| P19667 | LSGQTLHADHSLQAGAYTLT | Negative |
| P19667 | VTFAAVASLGMADNVLLSGQ | Negative |
| P19667 | LLTILVTFAAVASLGMADNV | Negative |
| P19667 | ASLGMADNVLLSGQTLHADH | Negative |
| P19667 | MADNVLLSGQTLHADHSLQA | Negative |
| P19667 | AAVASLGMADNVLLSGQTLH | Negative |
| P19667 | GQTLHADHSLQAGAYTLTIQ | Negative |
| P19667 | ADNVLLSGQTLHADHSLQAG | Negative |
| P19667 | AVASLGMADNVLLSGQTLHA | Negative |
| P19667 | QTLHADHSLQAGAYTLTIQN | Negative |
| P19667 | MAAKFLTILVTFAAVASLG  | Negative |
| P19667 | FAAVASLGMADNVLLSGQTL | Negative |
| P19667 | ILVTFAAVASLGMADNVLLS | Negative |
| P19667 | LVTFAAVASLGMADNVLLSG | Negative |
| P19667 | LGMADNVLLSGQTLHADHSL | Negative |
| P19667 | AKFLTILVTFAAVASLGMA  | Negative |
| P19667 | DNVLLSGQTLHADHSLQAGA | Negative |
| P19667 | SLGMADNVLLSGQTLHADHS | Negative |
| P19667 | LTILVTFAAVASLGMADNVL | Negative |
| P19667 | KFLTILVTFAAVASLGMAD  | Negative |
| P19707 | GLVFCSLVLGVSQWYSFLG  | Negative |
| P19707 | AAQGAWDMWRAYSDMREANY | Negative |
| P19707 | YSFLGEAAQGAWDMWRAYS  | Negative |
| P19707 | QGAWDMWRAYSDMREANYIG | Negative |
| P19707 | LFTGLVFCSLVLGVSQWYS  | Negative |
| P19707 | LGVSQWYSFLGEAAQGAWD  | Negative |
| P19707 | SQWYSFLGEAAQGAWDMWRA | Negative |
| P19707 | FCSLVLGVSSQWYSFLGEAA | Negative |
| P19707 | VFCSLVLGVSSQWYSFLGEA | Negative |

|        |                      |          |
|--------|----------------------|----------|
| P19707 | LVFCSLVLGVSQWYSFLGE  | Negative |
| P19707 | GEAAQGAWDMWRAYSDMREA | Negative |
| P19707 | MKLFTGLVFCSLVLGVSQW  | Negative |
| P19707 | SLVLGVSSQWYSFLGEAAQG | Negative |
| P19707 | VLGVSSQWYSFLGEAAQGAW | Negative |
| P19707 | KLFTGLVFCSLVLGVSQWY  | Negative |
| P19707 | CSLVLGVSQWYSFLGEAAQ  | Negative |
| P19707 | EAAQGAWDMWRAYSDMREAN | Negative |
| P19707 | GVSSQWYSFLGEAAQGAWDM | Negative |
| P19707 | SFLGEAAQGAWDMWRAYSDM | Negative |
| P19707 | LVLGVSSQWYSFLGEAAQGA | Negative |
| P19707 | QWYSFLGEAAQGAWDMWRAY | Negative |
| P19707 | FLGEAAQGAWDMWRAYSDMR | Negative |
| P19707 | SSQWYSFLGEAAQGAWDMWR | Negative |
| P19707 | VSSQWYSFLGEAAQGAWDMW | Negative |
| P19707 | LGEAAQGAWDMWRAYSDMRE | Negative |
| P19707 | TGLVFCSLVLGVSQWYSFL  | Negative |
| P19707 | AQGAWDMWRAYSDMREANYI | Negative |
| P19707 | GAWDMWRAYSDMREANYIGA | Negative |
| P19707 | WYSFLGEAAQGAWDMWRAYS | Negative |
| P19708 | LGVSQWYSFVSEAAQGAWD  | Negative |
| P19708 | EAAQGAWDMWRAYSDMREAN | Negative |
| P19708 | PGLLFCSLVLGVSGQWYSFV | Negative |
| P19708 | MKLFPGLLFCSLVLGVSGQW | Negative |
| P19708 | SFVSEAAQGAWDMWRAYSDM | Negative |
| P19708 | LFCSLVLGVSQWYSFVSEA  | Negative |
| P19708 | KLFPGLLFCSLVLGVSGQWY | Negative |
| P19708 | GAWDMWRAYSDMREANYKNS | Negative |
| P19708 | GQWYSFVSEAAQGAWDMWRA | Negative |
| P19708 | SLVLGVSGQWYSFVSEAAQG | Negative |
| P19708 | LLFCSLVLGVSGQWYSFVSE | Negative |
| P19708 | AAQGAWDMWRAYSDMREANY | Negative |
| P19708 | VSGQWYSFVSEAAQGAWDMW | Negative |
| P19708 | QGAWDMWRAYSDMREANYKN | Negative |
| P19708 | LFPGLLFCSLVLGVSGQWYS | Negative |
| P19708 | FCSLVLGVSQWYSFVSEAA  | Negative |
| P19708 | SEAAQGAWDMWRAYSDMREA | Negative |
| P19708 | WYSFVSEAAQGAWDMWRAYS | Negative |
| P19708 | CSLVLGVSQWYSFVSEAAQ  | Negative |
| P19708 | YSFVSEAAQGAWDMWRAYS  | Negative |
| P19708 | FVSEAAQGAWDMWRAYSDMR | Negative |
| P19708 | VSEAAQGAWDMWRAYSDMRE | Negative |
| P19708 | LVLGVSGQWYSFVSEAAQGA | Negative |
| P19708 | GVSGQWYSFVSEAAQGAWDM | Negative |
| P19708 | VLGVSGQWYSFVSEAAQGAW | Negative |
| P19708 | GLLFCSLVLGVSGQWYSFVS | Negative |



|        |                       |          |
|--------|-----------------------|----------|
| P19708 | QWYSFVSEAAQGAWDMWRAY  | Negative |
| P19708 | SGQWYSFVSEAAQGAWDMWR  | Negative |
| P19708 | AQGAWDMWRAYSDMREANYK  | Negative |
| P19801 | LPRKAGVFSDLSNQELKAVH  | Negative |
| P19801 | LMLQTAMAEPSPGTLPRKAG  | Negative |
| P19801 | PALGWAVAAILMLQTAMAEP  | Negative |
| P19801 | AMAEPSPGTLPRKAGVFSDL  | Negative |
| P19801 | TLPRKAGVFSDLSNQELKAV  | Negative |
| P19801 | TAMAEPSPGTLPRKAGVFSD  | Negative |
| P19801 | ALGWAVAAILMLQTAMAEPS  | Negative |
| P19801 | GTLPRKAGVFSDLSNQELKA  | Negative |
| P19801 | EPSPGTLPRKAGVFSDLSNQ  | Negative |
| P19801 | KAGVFSDLSNQELKAVHSFL  | Negative |
| P19801 | ILMLQTAMAEPSPGTLPRKA  | Negative |
| P19801 | QTAMAEPSPGTLPRKAGVFS  | Negative |
| P19801 | VAAILMLQTAMAEPSPGTLP  | Negative |
| P19801 | PRKAGVFSDLSNQELKAVHS  | Negative |
| P19801 | AAILMLQTAMAEPSPGTLPR  | Negative |
| P19801 | RKAGVFSDLSNQELKAVHSF  | Negative |
| P19801 | MAEPSPGTLPRKAGVFSDLS  | Negative |
| P19801 | AEPSPGTLPRKAGVFSDLSN  | Negative |
| P19801 | AVAAILMLQTAMAEPSPGTL  | Negative |
| P19801 | AILMLQTAMAEPSPGTLPRK  | Negative |
| P19801 | MLQTAMAEPSPGTLPRKAGV  | Negative |
| P19801 | LGWAVAAILMLQTAMAEPSP  | Negative |
| P19801 | WAVAAILMLQTAMAEPSPGT  | Negative |
| P19801 | AGVFSDLSNQELKAVHSFLW  | Negative |
| P19801 | MPALGWAVAAILMLQTAMAE  | Negative |
| P19801 | SPGTLPRKAGVFSDLSNQEL  | Negative |
| P19801 | LQTAMAEPSPGTLPRKAGVF  | Negative |
| P19801 | PGTLPRKAGVFSDLSNQELK  | Negative |
| P19801 | PSPGTLPRKAGVFSDLSNQE  | Negative |
| P19835 | SAAKLGAVYTEGGFVEGVNK  | Negative |
| P19835 | LTCCWAVASAAKLGAVYTEG  | Negative |
| P19835 | VVLGLTCCWAVASAAKLGAV  | Negative |
| P19835 | KLGA VYTEGGFVEGVNKKLG | Negative |
| P19835 | LGAVYTEGGFVEGVNKKLGL  | Negative |
| P19835 | TCCWAVASAAKLGAVYTEGG  | Negative |
| P19835 | CWAVASAAKLGAVYTEGGFV  | Negative |
| P19835 | CCWAVASAAKLGAVYTEGGF  | Negative |
| P19835 | GGFVEGVNKKLGLLGDSVDI  | Negative |
| P19835 | AAKLGAVYTEGGFVEGVNKK  | Negative |
| P19835 | GAVYTEGGFVEGVNKKLGLL  | Negative |
| P19835 | VASAAKLGAVYTEGGFVEGV  | Negative |
| P19835 | MGRLQLVVLGLTCCWAVASA  | Negative |
| P19835 | ASAAKLGAVYTEGGFVEGVN  | Negative |

|        |                      |          |
|--------|----------------------|----------|
| P19835 | LQLVVLGLTCCWAVASAAKL | Negative |
| P19835 | AVASAAKLGAVYTEGGFVEG | Negative |
| P19835 | TEGGFVEGVNKKLGLLGDSV | Negative |
| P19835 | VLGLTCCWAVASAAKLGAVY | Negative |
| P19835 | AVYTEGGFVEGVNKKLGLLG | Negative |
| P19835 | WAVASAAKLGAVYTEGGFVE | Negative |
| P19835 | GRLQLVVLGLTCCWAVASAA | Negative |
| P19835 | EGGFVEGVNKKLGLLGDSVD | Negative |
| P19835 | VYTEGGFVEGVNKKLGLLGD | Negative |
| P19835 | YTEGGFVEGVNKKLGLLGDS | Negative |
| P19835 | AKLGAVYTEGGFVEGVNKKL | Negative |
| P19835 | QLVVLGLTCCWAVASAAKLG | Negative |
| P19835 | RLQLVVLGLTCCWAVASAAK | Negative |
| P19835 | LGLTCCWAVASAAKLGAVYT | Negative |
| P19835 | GLTCCWAVASAAKLGAVYTE | Negative |
| P19855 | NADGYIRKRDGCKLSCLFGN | Negative |
| P19855 | IRKRDGCKLSCLFGNEGCNK | Negative |
| P19855 | DGYIRKRDGCKLSCLFGNEG | Negative |
| P19855 | GCKLSCLFGNEGCNKECKSY | Negative |
| P19855 | VSASMLIESLVNADGYIRKR | Negative |
| P19855 | LLLLLIVSASMLIESLVNAD | Negative |
| P19855 | ESLVNADGYIRKRDGCKLSC | Negative |
| P19855 | MKLLLLLIVSASMLIESLVN | Negative |
| P19855 | RDGCKLSCLFGNEGCNKECK | Negative |
| P19855 | LIESLVNADGYIRKRDGCKL | Negative |
| P19855 | LLLLIVSASMLIESLVNADG | Negative |
| P19855 | ADGYIRKRDGCKLSCLFGNE | Negative |
| P19855 | ASMLIESLVNADGYIRKRDG | Negative |
| P19855 | LVNADGYIRKRDGCKLSCLF | Negative |
| P19855 | LLLIVSASMLIESLVNADGY | Negative |
| P19855 | SASMLIESLVNADGYIRKRD | Negative |
| P19855 | YIRKRDGCKLSCLFGNEGCN | Negative |
| P19855 | SMLIESLVNADGYIRKRDGC | Negative |
| P19855 | IVSASMLIESLVNADGYIRK | Negative |
| P19855 | KRDGCKLSCLFGNEGCNKEC | Negative |
| P19855 | KLLLLLIVSASMLIESLVNA | Negative |
| P19855 | DGCKLSCLFGNEGCNKECKS | Negative |
| P19855 | VNADGYIRKRDGCKLSCLFG | Negative |
| P19855 | RKRDGCKLSCLFGNEGCNKE | Negative |
| P19855 | MLIESLVNADGYIRKRDGCK | Negative |
| P19855 | LLIVSASMLIESLVNADGYI | Negative |
| P19855 | GYIRKRDGCKLSCLFGNEGC | Negative |
| P19855 | SLVNADGYIRKRDGCKLSCL | Negative |
| P19855 | IESLVNADGYIRKRDGCKLS | Negative |
| P19872 | RAVLVLAVVALVAVATSRAQ | Negative |
| P19872 | PWWGKRALGAPAAGDCVSAS | Negative |

|        |                       |          |
|--------|-----------------------|----------|
| P19872 | VATSRAQLNFTPWWGKRALG  | Negative |
| P19872 | FTPWWGKRALGAPAAGDCVS  | Negative |
| P19872 | AVLVLA VVALVAVATSRAQL | Negative |
| P19872 | NFTPWWGKRALGAPAAGDCV  | Negative |
| P19872 | TPWWGKRALGAPAAGDCVSA  | Negative |
| P19872 | VRAVLVLAVVALVAVATSRA  | Negative |
| P19872 | VAVATSRAQLNFTPWWGKRA  | Negative |
| P19872 | RAQLNFTPWWGKRALGAPAA  | Negative |
| P19872 | WGKRALGAPAAGDCVSASPQ  | Negative |
| P19872 | VALVAVATSRAQLNFTPWWG  | Negative |
| P19872 | LVAVATSRAQLNFTPWWGKR  | Negative |
| P19872 | AQLNFTPWWGKRALGAPAAG  | Negative |
| P19872 | ATSRAQLNFTPWWGKRALGA  | Negative |
| P19872 | AVATSRAQLNFTPWWGKRAL  | Negative |
| P19872 | LVLAVVALVAVATSRAQLNF  | Negative |
| P19872 | LAVVALVAVATSRAQLNFTP  | Negative |
| P19872 | VVALVAVATSRAQLNFTPWW  | Negative |
| P19872 | QVRAVLVLAVVALVAVATSR  | Negative |
| P19872 | WWGKRALGAPAAGDCVSASP  | Negative |
| P19872 | SRAQLNFTPWWGKRALGAPA  | Negative |
| P19872 | TSRAQLNFTPWWGKRALGAP  | Negative |
| P19872 | AVVALVAVATSRAQLNFTPW  | Negative |
| P19872 | MQVRAVLVLAVVALVAVATS  | Negative |
| P19872 | VLVLAVVALVAVATSRAQLN  | Negative |
| P19872 | ALVAVATSRAQLNFTPWWGK  | Negative |
| P19872 | LNFTPWWGKRALGAPAAGDC  | Negative |
| P19872 | QLNFTPWWGKRALGAPAAGD  | Negative |
| P19874 | EAAVLTRIGTELRCQCIKTH  | Negative |
| P19874 | SKLAVALLATFLLSLTLCEA  | Negative |
| P19874 | LAVALLATFLLSLTLCEAAV  | Negative |
| P19874 | LLSLTLCEAAVLTRIGTELRC | Negative |
| P19874 | ATFLLSLTLCEAAVLTRIGT  | Negative |
| P19874 | LTLCEAAVLTRIGTELRCQC  | Negative |
| P19874 | AVLTRIGTELRCQCIKTHST  | Negative |
| P19874 | LCEAAVLTRIGTELRCQCIK  | Negative |
| P19874 | GTELRCQCIKTHSTPFHPKF  | Negative |
| P19874 | FLLSLTLCEAAVLTRIGTEL  | Negative |
| P19874 | IGTELRCQCIKTHSTPFHPK  | Negative |
| P19874 | LATFLLSLTLCEAAVLTRIG  | Negative |
| P19874 | CEAAVLTRIGTELRCQCIKT  | Negative |
| P19874 | LSLTLCEAAVLTRIGTELRC  | Negative |
| P19874 | KLAVALLATFLLSLTLCEAA  | Negative |
| P19874 | RIGTELRCQCIKTHSTPFHP  | Negative |
| P19874 | NSKLAVALLATFLLSLTLCE  | Negative |
| P19874 | TLCEAAVLTRIGTELRCQCI  | Negative |
| P19874 | TELRCQCIKTHSTPFHPKFI  | Negative |

|        |                      |          |
|--------|----------------------|----------|
| P19874 | TRIGTELRCQCIKTHSTPFH | Negative |
| P19874 | LLATFLLSLTLCEAAVLTRI | Negative |
| P19874 | AVALLATFLLSLTLCEAAVL | Negative |
| P19874 | SLTLCEAAVLTRIGTELRCQ | Negative |
| P19874 | VALLATFLLSLTLCEAAVLT | Negative |
| P19874 | TFLLSLTLCEAAVLTRIGTE | Negative |
| P19874 | AAVLTRIGTELRCQCIKTHS | Negative |
| P19874 | LTRIGTELRCQCIKTHSTPF | Negative |
| P19874 | VLTRIGTELRCQCIKTHSTP | Negative |
| P19874 | MNSKLAVALLATFLLSLTLC | Negative |
| P19876 | MAHATLSAAPSNPRLLRVAL | Negative |
| P19876 | ASRRAAGASVVTELRCQCLQ | Negative |
| P19876 | APSNPRLLRVALLLLLLVAA | Negative |
| P19876 | LLLVAASRRAAGASVVTEL  | Negative |
| P19876 | AAPSNPRLLRVALLLLLLVA | Negative |
| P19876 | VALLLLLLVAASRRAAGASV | Negative |
| P19876 | SRRAAGASVVTELRCQCLQT | Negative |
| P19876 | LLLLVAASRRAAGASVVTE  | Negative |
| P19876 | RRAAGASVVTELRCQCLQTL | Negative |
| P19876 | AASRRAAGASVVTELRCQCL | Negative |
| P19876 | LRVALLLLLLVAASRRAAGA | Negative |
| P19876 | RLLRVALLLLLLVAASRRAA | Negative |
| P19876 | VAASRRAAGASVVTELRCQC | Negative |
| P19876 | AHATLSAAPSNPRLLRVALL | Negative |
| P19876 | LVAASRRAAGASVVTELRCQ | Negative |
| P19876 | LLRVALLLLLLVAASRRAAG | Negative |
| P19876 | HATLSAAPSNPRLLRVALLL | Negative |
| P19876 | ALLLLLLVAASRRAAGASVV | Negative |
| P19876 | ATLSAAPSNPRLLRVALLLL | Negative |
| P19876 | LLLVAASRRAAGASVVTEL  | Negative |
| P19876 | PRLLRVALLLLLLVAASRRA | Negative |
| P19876 | LLVAASRRAAGASVVTELRC | Negative |
| P19876 | LSAAPSNPRLLRVALLLLLL | Negative |
| P19876 | SNPRLLRVALLLLLLVAASR | Negative |
| P19876 | NPRLLRVALLLLLLVAASRR | Negative |
| P19876 | RVALLLLLLVAASRRAAGAS | Negative |
| P19876 | PSNPRLLRVALLLLLLVAAS | Negative |
| P19876 | TLAAPSNPRLLRVALLLLLL | Negative |
| P19876 | SAAPSNPRLLRVALLLLLLV | Negative |
| P19883 | EDRSAQAGNCWLRQAKNGRC | Negative |
| P19883 | QAGNCWLRQAKNGRCQVLYK | Negative |
| P19883 | GLCLLLLLLCQFMEDRSAQA | Negative |
| P19883 | AQAGNCWLRQAKNGRCQVLY | Negative |
| P19883 | ARHQPGGLCLLLLLLCQFME | Negative |
| P19883 | GNCWLRQAKNGRCQVLYKTE | Negative |
| P19883 | LCLLLLLLCQFMEDRSAQAG | Negative |

|        |                       |          |
|--------|-----------------------|----------|
| P19883 | FMEDRSAQAGNCWLRQAKNG  | Negative |
| P19883 | SAQAGNCWLRQAKNGRCQVL  | Negative |
| P19883 | GGLCLLLLLLLCQFMEDRSAQ | Negative |
| P19883 | HQPGGLCLLLLLLLCQFMEDR | Negative |
| P19883 | RHQPGGLCLLLLLLLCQFMED | Negative |
| P19883 | MVRARHQPGGLCLLLLLLLCQ | Negative |
| P19883 | PGGLCLLLLLLLCQFMEDRSA | Negative |
| P19883 | LCQFMEDRSAQAGNCWLRQA  | Negative |
| P19883 | AGNCWLRQAKNGRCQVLYKT  | Negative |
| P19883 | DRSAQAGNCWLRQAKNGRCQ  | Negative |
| P19883 | QPGGLCLLLLLLLCQFMEDRS | Negative |
| P19883 | QFMEDRSAQAGNCWLRQAKN  | Negative |
| P19883 | LLCQFMEDRSAQAGNCWLR   | Negative |
| P19883 | LLLLLLCQFMEDRSAQAGNC  | Negative |
| P19883 | MEDRSAQAGNCWLRQAKNGR  | Negative |
| P19883 | CQFMEDRSAQAGNCWLRQAK  | Negative |
| P19883 | RSAGAGNCWLRQAKNGRCQV  | Negative |
| P19883 | LLCQFMEDRSAQAGNCWLRQ  | Negative |
| P19883 | RARHQPGGLCLLLLLLLCQFM | Negative |
| P19883 | VRARHQPGGLCLLLLLLLCQF | Negative |
| P19883 | LLLLLLCQFMEDRSAQAGNCW | Negative |
| P19883 | CLLLLLLLCQFMEDRSAQAGN | Negative |
| P19926 | TLIAAAVAGIVLLASNAQAQ  | Negative |
| P19926 | AQTVPEGYQLQQVLMMSRHN  | Negative |
| P19926 | AAAVAGIVLLASNAQAQTVP  | Negative |
| P19926 | TVPEGYQLQQVLMMSRHNLR  | Negative |
| P19926 | IVLLASNAQAQTVPEGYQLQ  | Negative |
| P19926 | IAAAVAGIVLLASNAQAQTV  | Negative |
| P19926 | AGIVLLASNAQAQTVPEGYQ  | Negative |
| P19926 | VPEGYQLQQVLMMSRHNLR   | Negative |
| P19926 | SNAQAQTVPEGYQLQQVLM   | Negative |
| P19926 | MNKTIAAAVAGIVLLASNA   | Negative |
| P19926 | ASNAQAQTVPEGYQLQQVLM  | Negative |
| P19926 | QLQQVLMMSRHNLRAPLANN  | Negative |
| P19926 | GIVLLASNAQAQTVPEGYQL  | Negative |
| P19926 | EGYQLQQVLMMSRHNLRAPL  | Negative |
| P19926 | QAQTVPEGYQLQQVLMMSRH  | Negative |
| P19926 | GYQLQQVLMMSRHNLRAPLA  | Negative |
| P19926 | YQLQQVLMMSRHNLRAPLAN  | Negative |
| P19926 | KTLIAAAVAGIVLLASNAQA  | Negative |
| P19926 | NKTLIAAAVAGIVLLASNAQ  | Negative |
| P19926 | VAGIVLLASNAQAQTVPEGY  | Negative |
| P19926 | QTVPEGYQLQQVLMMSRHN   | Negative |
| P19926 | LIAAAVAGIVLLASNAQAQT  | Negative |
| P19926 | PEGYQLQQVLMMSRHNLRAP  | Negative |
| P19926 | LASNAQAQTVPEGYQLQQVL  | Negative |

|        |                       |          |
|--------|-----------------------|----------|
| P19926 | AQAQTVPEGYQLQQVLMMSR  | Negative |
| P19926 | VLLASNAQAQTVPEGYQLQQ  | Negative |
| P19926 | AVAGIVLLASNAQAQTVPEG  | Negative |
| P19926 | LLASNAQAQTVPEGYQLQQV  | Negative |
| P19926 | NAQAQTVPEGYQLQQVLMMS  | Negative |
| P19957 | AGTLVLEAAVTGVPVKGQDT  | Negative |
| P19957 | SFLIVVVFLIAGTLVLEAAV  | Negative |
| P19957 | KGQDTVKG RVPFNGQDPVKG | Negative |
| P19957 | VLEAAVTGVPVKGQDTVKG R | Negative |
| P19957 | AVTGVPVKGQDTVKG RVPFN | Negative |
| P19957 | LIAGTLVLEAAVTGVPVKGQ  | Negative |
| P19957 | FLIVVVFLIAGTLVLEAAVT  | Negative |
| P19957 | TLVLEAAVTGVPVKGQDTVK  | Negative |
| P19957 | VTGVPVKGQDTVKG RVPFNG | Negative |
| P19957 | IAGTLVLEAAVTGVPVKGQD  | Negative |
| P19957 | VVVFLIAGTLVLEAAVTGVP  | Negative |
| P19957 | LEAAVTGVPVKGQDTVKG R  | Negative |
| P19957 | VKGQDTVKG RVPFNGQDPVK | Negative |
| P19957 | LVLEAAVTGVPVKGQDTVKG  | Negative |
| P19957 | VFLIAGTLVLEAAVTGVPVK  | Negative |
| P19957 | RASSFLIVVVFLIAGTLVLE  | Negative |
| P19957 | FLIAGTLVLEAAVTGVPVKG  | Negative |
| P19957 | GTLVLEAAVTGVPVKGQDTV  | Negative |
| P19957 | AAVTGVPVKGQDTVKG RVPF | Negative |
| P19957 | VPVKGQDTVKG RVPFNGQDP | Negative |
| P19957 | GVPVKGQDTVKG RVPFNGQD | Negative |
| P19957 | SSFLIVVVFLIAGTLVLEAA  | Negative |
| P19957 | MRASSFLIVVVFLIAGTLVL  | Negative |
| P19957 | VVFLIAGTLVLEAAVTGVPV  | Negative |
| P19957 | EAAVTGVPVKGQDTVKG RVP | Negative |
| P19957 | TGVPVKGQDTVKG RVPFNGQ | Negative |
| P19957 | LIVVVFLIAGTLVLEAAVTG  | Negative |
| P19957 | ASSFLIVVVFLIAGTLVLEA  | Negative |
| P19957 | PVKGQDTVKG RVPFNGQDPV | Negative |
| P19959 | VTIVCLDLGYTLTCCNQSS   | Negative |
| P19959 | VVTIVCLDLGYTLTCCNQSS  | Negative |
| P19959 | VCLDLGYTLTCCNQSSQPK   | Negative |
| P19959 | TCCNQSSQPKTTTDCADNS   | Negative |
| P19959 | CNQSSQPKTTTDCADNSCY   | Negative |
| P19959 | YTLTCCNQSSQPKTTTDCA   | Negative |
| P19959 | MKTLTLLTLVVVTIVCLDLGY | Negative |
| P19959 | LLTTLVVVTIVCLDLGYTLT  | Negative |
| P19959 | LDLGYTLTCCNQSSQPKTT   | Negative |
| P19959 | LGYTLTCCNQSSQPKTTTD   | Negative |
| P19959 | SSQPKTTTDCADNSCYKMTW  | Negative |
| P19959 | QQSSQPKTTTDCADNSCYKM  | Negative |

|        |                      |          |
|--------|----------------------|----------|
| P19959 | TLTCNQQSSQPKTTTDCAD  | Negative |
| P19959 | IVCLDLGYTLTCNQQSSQP  | Negative |
| P19959 | GYTLTCNQQSSQPKTTTDC  | Negative |
| P19959 | LTCCNQQSSQPKTTTDCADN | Negative |
| P19959 | CLDLGYTLTCNQQSSQPKT  | Negative |
| P19959 | SQPKTTTDCADNSCYKMTWR | Negative |
| P19959 | KTLLTLVVVTIVCLDLGYT  | Negative |
| P19959 | DLGYTLTCNQQSSQPKTTT  | Negative |
| P19959 | LTLVVVTIVCLDLGYTLTCC | Negative |
| P19959 | TLLLTLVVVTIVCLDLGYTL | Negative |
| P19959 | LVVVTIVCLDLGYTLTCNQ  | Negative |
| P19959 | TIVCLDLGYTLTCNQQSSQ  | Negative |
| P19959 | QSSQPKTTTDCADNSCYKMT | Negative |
| P19959 | NQQSSQPKTTTDCADNSCYK | Negative |
| P19959 | VVVTIVCLDLGYTLTCNQ   | Negative |
| P19959 | CCNQQSSQPKTTTDCADNSC | Negative |
| P19959 | LLTLVVVTIVCLDLGYTLTC | Negative |
| P19999 | MLLLPLLVLVCVSVSSSGS  | Negative |
| P19999 | SSGSQTCEETLKTCSVIACG | Negative |
| P19999 | VVSVSSSGSQTCEETLKTC  | Negative |
| P19999 | ETLKTCSVIACGRDGRDGP  | Negative |
| P19999 | PLLVLVCVSVSSSGSQTCE  | Negative |
| P19999 | SSSGSQTCEETLKTCSVIAC | Negative |
| P19999 | VSVSSSGSQTCEETLKTC   | Negative |
| P19999 | TCEETLKTCSVIACGRDGRD | Negative |
| P19999 | CSVIACGRDGRDGPKEG    | Negative |
| P19999 | SQTCEETLKTCSVIACGRDG | Negative |
| P19999 | EETLKTCSVIACGRDGRDG  | Negative |
| P19999 | QTCEETLKTCSVIACGRDGR | Negative |
| P19999 | LVLLCVVSVSSSGSQTCEET | Negative |
| P19999 | LLVLLCVVSVSSSGSQTCEE | Negative |
| P19999 | LLLPLLVLVCVSVSSSGSQ  | Negative |
| P19999 | SGSQTCEETLKTCSVIACGR | Negative |
| P19999 | TCSVIACGRDGRDGPKEG   | Negative |
| P19999 | LLCVVSVSSSGSQTCEETLK | Negative |
| P19999 | GSQTCEETLKTCSVIACGRD | Negative |
| P19999 | CVVSVSSSGSQTCEETLKTC | Negative |
| P19999 | LCVVSVSSSGSQTCEETLKT | Negative |
| P19999 | CEETLKTCSVIACGRDGRDG | Negative |
| P19999 | TLKTCSVIACGRDGRDGPKE | Negative |
| P19999 | SVSSSGSQTCEETLKTC    | Negative |
| P19999 | KTCSVIACGRDGRDGPKEG  | Negative |
| P19999 | VLLCVVSVSSSGSQTCEETL | Negative |
| P19999 | LPLLVLVCVSVSSSGSQT   | Negative |
| P19999 | VSSSGSQTCEETLKTC     | Negative |
| P19999 | LKTCSVIACGRDGRDGPKE  | Negative |

|        |                      |          |
|--------|----------------------|----------|
| P20013 | VACPDGVNTATNAACCQLFA | Negative |
| P20013 | ALTRRVACPDGVNTATNAAC | Negative |
| P20013 | ALQGANAALTRRVACPDGVN | Negative |
| P20013 | LSFVSVIGALQGANAALTRR | Negative |
| P20013 | AALTRRVACPDGVNTATNAA | Negative |
| P20013 | ACPDGVNTATNAACCQLFAV | Negative |
| P20013 | RVACPDGVNTATNAACCQLF | Negative |
| P20013 | FVSVIGALQGANAALTRRVA | Negative |
| P20013 | SLLSFVSVIGALQGANAALT | Negative |
| P20013 | TRRVACPDGVNTATNAACCQ | Negative |
| P20013 | VSVIGALQGANAALTRRVAC | Negative |
| P20013 | ANAALTRRVACPDGVNTATN | Negative |
| P20013 | RRVACPDGVNTATNAACCQL | Negative |
| P20013 | LLSFVSVIGALQGANAALTR | Negative |
| P20013 | IGALQGANAALTRRVACPDG | Negative |
| P20013 | SFVSVIGALQGANAALTRRV | Negative |
| P20013 | QGANAALTRRVACPDGVNTA | Negative |
| P20013 | LTRRVACPDGVNTATNAACC | Negative |
| P20013 | MAFKSLLSFVSVIGALQGAN | Negative |
| P20013 | FKSLLSFVSVIGALQGANA  | Negative |
| P20013 | CPDGVNTATNAACCQLFAVR | Negative |
| P20013 | SVIGALQGANAALTRRVACP | Negative |
| P20013 | PDGVNTATNAACCQLFAVRE | Negative |
| P20013 | AFKSLLSFVSVIGALQGAN  | Negative |
| P20013 | NAALTRRVACPDGVNTATNA | Negative |
| P20013 | LQGANAALTRRVACPDGVNT | Negative |
| P20013 | GALQGANAALTRRVACPDGV | Negative |
| P20013 | KSLLSFVSVIGALQGANAAL | Negative |
| P20013 | GANAALTRRVACPDGVNTAT | Negative |
| P20029 | MMKFTVVAAALLLGAVRAE  | Negative |
| P20029 | VGTVVGIDLGTTYSCVGVFK | Negative |
| P20029 | EEEDKKEDVGTVVGIDLGTT | Negative |
| P20029 | LLLGAVRAEEEDKKEDVGT  | Negative |
| P20029 | DVGTVVGIDLGTTYSCVGVF | Negative |
| P20029 | ALLLGAVRAEEEDKKEDVG  | Negative |
| P20029 | LLGAVRAEEEDKKEDVGTVV | Negative |
| P20029 | TVVGIDLGTTYSCVGVFKNG | Negative |
| P20029 | AALLLGAVRAEEEDKKEDV  | Negative |
| P20029 | LLGAVRAEEEDKKEDVGTV  | Negative |
| P20029 | DKKEDVGTVVGIDLGTTYSC | Negative |
| P20029 | VRAEEEDKKEDVGTVVGIDL | Negative |
| P20029 | AVRAEEEDKKEDVGTVVGID | Negative |
| P20029 | VAAALLLGAVRAEEEDKKE  | Negative |
| P20029 | EDVGTVVGIDLGTTYSCVGV | Negative |
| P20029 | FTVVAAALLLGAVRAEEED  | Negative |
| P20029 | VVAAALLLGAVRAEEEDKK  | Negative |



|        |                      |          |
|--------|----------------------|----------|
| P20029 | RAEEEDKKEDVGTVVGIDLG | Negative |
| P20029 | KFTVVAAALLLLGAVRAEEE | Negative |
| P20029 | MKFTVVAAALLLLGAVRAEE | Negative |
| P20029 | KEDVGTVVGIDLGTTYSCVG | Negative |
| P20029 | KKEDVGTVVGIDLGTTYSCV | Negative |
| P20029 | GTVVGIDLGTTYSCVGVFKN | Negative |
| P20029 | EDKKEDVGTVVGIDLGTTYS | Negative |
| P20029 | AEEDKKEDVGTVVGIDLGT  | Negative |
| P20029 | AAALLLLGAVRAEEEDKKED | Negative |
| P20029 | EEDKKEDVGTVVGIDLGTTY | Negative |
| P20029 | LGAVRAEEEDKKEDVGTVVG | Negative |
| P20029 | GAVRAEEEDKKEDVGTVVGI | Negative |
| P20041 | NHRYTLLALAAAALSAGAHA | Negative |
| P20041 | MNHRYTLLALAAAALSAGAH | Negative |
| P20041 | HRYTLLALAAAALSAGAHAT | Negative |
| P20041 | WGEVAEPSLPADSAVCKTLS | Negative |
| P20041 | AAAALSAGAHATGTSVTAPW | Negative |
| P20041 | APWGEVAEPSLPADSAVCKT | Negative |
| P20041 | LALAAAALSAGAHATGTSVT | Negative |
| P20041 | ALAAAALSAGAHATGTSVTA | Negative |
| P20041 | ATGTSVTAPWGEVAEPSLPA | Negative |
| P20041 | SVTAPWGEVAEPSLPADSAV | Negative |
| P20041 | VTAPWGEVAEPSLPADSAVC | Negative |
| P20041 | TGTSVTAPWGEVAEPSLPAD | Negative |
| P20041 | RYTLLALAAAALSAGAHATG | Negative |
| P20041 | LSAGAHATGTSVTAPWGEVA | Negative |
| P20041 | AALSAGAHATGTSVTAPWGE | Negative |
| P20041 | GAHATGTSVTAPWGEVAEPS | Negative |
| P20041 | TAPWGEVAEPSLPADSAVCK | Negative |
| P20041 | GTSVTAPWGEVAEPSLPADS | Negative |
| P20041 | YTLLALAAAALSAGAHATGT | Negative |
| P20041 | LAAAALSAGAHATGTSVTAP | Negative |
| P20041 | SAGAHATGTSVTAPWGEVAE | Negative |
| P20041 | PWGEVAEPSLPADSAVCKTL | Negative |
| P20041 | TSVTAPWGEVAEPSLPADSA | Negative |
| P20041 | AGAHATGTSVTAPWGEVAEP | Negative |
| P20041 | AAALSAGAHATGTSVTAPWG | Negative |
| P20041 | AHATGTSVTAPWGEVAEPSL | Negative |
| P20041 | HATGTSVTAPWGEVAEPSLP | Negative |
| P20041 | ALSAGAHATGTSVTAPWGEV | Negative |
| P20041 | TLLALAAAALSAGAHATGTS | Negative |
| P20058 | KASGIPIALGVWGLCWSLAT | Negative |
| P20058 | PLTSAHGNVTEGESGTKPEA | Negative |
| P20058 | GLCWSLATVNSVPLTSAHGN | Negative |
| P20058 | CWSLATVNSVPLTSAHGNVT | Negative |
| P20058 | IALGVWGLCWSLATVNSVPL | Negative |

|        |                       |          |
|--------|-----------------------|----------|
| P20058 | WSLATVNSVPLTSAHGNVTE  | Negative |
| P20058 | IPIALGVWGLCWSLATVNSV  | Negative |
| P20058 | VKASGIPIALGVWGLCWSLA  | Negative |
| P20058 | GVWGLCWSLATVNSVPLTSA  | Negative |
| P20058 | MVKASGIPIALGVWGLCWSL  | Negative |
| P20058 | NSVPLTSAHGNVTEGESGTK  | Negative |
| P20058 | ATVNSVPLTSAHGNVTEGES  | Negative |
| P20058 | ALGVWGLCWSLATVNSVPLT  | Negative |
| P20058 | WGLCWSLATVNSVPLTSAHG  | Negative |
| P20058 | GIPIALGVWGLCWSLATVNS  | Negative |
| P20058 | VWGLCWSLATVNSVPLTSAH  | Negative |
| P20058 | TSAHGNVTEGESGTKPEADV  | Negative |
| P20058 | L TSAHGNVTEGESGTKPEAD | Negative |
| P20058 | VPLTSAHGNVTEGESGTKPE  | Negative |
| P20058 | VNSVPLTSAHGNVTEGESGT  | Negative |
| P20058 | SVPLTSAHGNVTEGESGTKP  | Negative |
| P20058 | LATVNSVPLTSAHGNVTEGE  | Negative |
| P20058 | PIALGVWGLCWSLATVNSVP  | Negative |
| P20058 | SGIPIALGVWGLCWSLATVN  | Negative |
| P20058 | SLATVNSVPLTSAHGNVTEG  | Negative |
| P20058 | LCWSLATVNSVPLTSAHGNV  | Negative |
| P20058 | SAHGNVTEGESGTKPEADVI  | Negative |
| P20058 | ASGIPIALGVWGLCWSLATV  | Negative |
| P20058 | TVNSVPLTSAHGNVTEGESG  | Negative |
| P20059 | AHETVAKGENGTKPDSVDIE  | Negative |
| P20059 | AAHETVAKGENGTKPDSVDI  | Negative |
| P20059 | ARTVVALNILVLLGLCWSLA  | Negative |
| P20059 | MARTVVALNILVLLGLCWSL  | Negative |
| P20059 | NPLPAAHETVAKGENGTKPD  | Negative |
| P20059 | ALNILVLLGLCWSLAVANPL  | Negative |
| P20059 | LGLCWSLAVANPLPAAHETV  | Negative |
| P20059 | LVLLGLCWSLAVANPLPAAH  | Negative |
| P20059 | LLGLCWSLAVANPLPAAHET  | Negative |
| P20059 | PAAHETVAKGENGTKPDSDV  | Negative |
| P20059 | GLCWSLAVANPLPAAHETVA  | Negative |
| P20059 | SLAVANPLPAAHETVAKGEN  | Negative |
| P20059 | LAVANPLPAAHETVAKGENG  | Negative |
| P20059 | AVANPLPAAHETVAKGENGT  | Negative |
| P20059 | WSLAVANPLPAAHETVAKGE  | Negative |
| P20059 | ANPLPAAHETVAKGENGTKP  | Negative |
| P20059 | LNILVLLGLCWSLAVANPLP  | Negative |
| P20059 | RTVVALNILVLLGLCWSLAV  | Negative |
| P20059 | LPAAHETVAKGENGTKPDS   | Negative |
| P20059 | ILVLLGLCWSLAVANPLPAA  | Negative |
| P20059 | VANPLPAAHETVAKGENGTK  | Negative |
| P20059 | HETVAKGENGTKPDSVDIEH  | Negative |

|        |                      |          |
|--------|----------------------|----------|
| P20059 | LCWSLAVANPLPAAHETVAK | Negative |
| P20059 | VLLGLCWSLAVANPLPAAHE | Negative |
| P20059 | TVVALNILVLLGLCWSLAVA | Negative |
| P20059 | PLPAAHETVAKGENGTKPDS | Negative |
| P20059 | VALNILVLLGLCWSLAVANP | Negative |
| P20059 | CWSLAVANPLPAAHETVAKG | Negative |
| P20059 | VVALNILVLLGLCWSLAVAN | Negative |
| P20062 | EMDSHLVEKLGQHLLPWMDR | Negative |
| P20062 | MCEIPEMDSHLVEKLGQHLL | Negative |
| P20062 | DSHLVEKLGQHLLPWMDRLS | Negative |
| P20062 | LGVLGALTEMCEIPEMDSHL | Negative |
| P20062 | LVEKLGQHLLPWMDRLSLEH | Negative |
| P20062 | ALTEMCEIPEMDSHLVEKLG | Negative |
| P20062 | TEMCEIPEMDSHLVEKLGQH | Negative |
| P20062 | LGALTEMCEIPEMDSHLVEK | Negative |
| P20062 | EMCEIPEMDSHLVEKLGQHL | Negative |
| P20062 | VLGALTEMCEIPEMDSHLVE | Negative |
| P20062 | HLGAFLFLLGVLGALTEMCE | Negative |
| P20062 | MDSHLVEKLGQHLLPWMDRL | Negative |
| P20062 | MRHLGAFLFLLGVLGALTEM | Negative |
| P20062 | IPEMDSHLVEKLGQHLLPWM | Negative |
| P20062 | RHLGAFLFLLGVLGALTEMC | Negative |
| P20062 | CEIPEMDSHLVEKLGQHLLP | Negative |
| P20062 | FLLGVLGALTEMCEIPEMDS | Negative |
| P20062 | LTEMCEIPEMDSHLVEKLGQ | Negative |
| P20062 | LFLLGVLGALTEMCEIPEMD | Negative |
| P20062 | GAFLFLLGVLGALTEMCEIP | Negative |
| P20062 | EIPEMDSHLVEKLGQHLLPW | Negative |
| P20062 | GVLGALTEMCEIPEMDSHLV | Negative |
| P20062 | GALTEMCEIPEMDSHLVEKL | Negative |
| P20062 | LLGVLGALTEMCEIPEMDSH | Negative |
| P20062 | FLFLLGVLGALTEMCEIPEM | Negative |
| P20062 | HLVEKLGQHLLPWMDRLSLE | Negative |
| P20062 | SHLVEKLGQHLLPWMDRLSL | Negative |
| P20062 | AFLFLLGVLGALTEMCEIPE | Negative |
| P20062 | PEMDSHLVEKLGQHLLPWMD | Negative |
| P20068 | CSDSEEDVRALEADLLTNMH | Negative |
| P20068 | LTLLAFSSWSLCSDSEEDVR | Negative |
| P20068 | DVRALEADLLTNMHASKVSK | Negative |
| P20068 | SWSLCSDSEEDVRALEADLL | Negative |
| P20068 | NLQLVCLTLLAFSSWSLCSD | Negative |
| P20068 | EDVRALEADLLTNMHASKVS | Negative |
| P20068 | EEDVRALEADLLTNMHASKV | Negative |
| P20068 | SDSEEDVRALEADLLTNMHA | Negative |
| P20068 | VCLTLLAFSSWSLCSDSEED | Negative |
| P20068 | AFSSWSLCSDSEEDVRALEA | Negative |

|        |                      |          |
|--------|----------------------|----------|
| P20068 | IGMNLQLVCLTLLAFSSWSL | Negative |
| P20068 | VRALEADLLTNMHASKVSKG | Negative |
| P20068 | RALEADLLTNMHASKVSKGS | Negative |
| P20068 | LAFSSWSLCSDSEEDVRALE | Negative |
| P20068 | LLAFSSWSLCSDSEEDVRAL | Negative |
| P20068 | LQLVCLTLLAFSSWSLCSDS | Negative |
| P20068 | SSWSLCSDSEEDVRALEADL | Negative |
| P20068 | LCSDSEEDVRALEADLLTNM | Negative |
| P20068 | GMNLQLVCLTLLAFSSWSLC | Negative |
| P20068 | QLVCLTLLAFSSWSLCSDSE | Negative |
| P20068 | WSLCSDSEEDVRALEADLLT | Negative |
| P20068 | TLLAFSSWSLCSDSEEDVRA | Negative |
| P20068 | SLCSDSEEDVRALEADLLTN | Negative |
| P20068 | FSSWSLCSDSEEDVRALEAD | Negative |
| P20068 | SEEDVRALEADLLTNMHASK | Negative |
| P20068 | MIGMNLQLVCLTLLAFSSWS | Negative |
| P20068 | MNLQLVCLTLLAFSSWSLCS | Negative |
| P20068 | DSEEDVRALEADLLTNMHAS | Negative |
| P20068 | CLTLLAFSSWSLCSDSEEDV | Negative |
| P20112 | ALPDETEVVEETVAEVPVGA | Negative |
| P20112 | EVVEETVAEVPVGANPVQVE | Negative |
| P20112 | GKALAAPQQEALPDETEVVE | Negative |
| P20112 | AAPQQEALPDETEVVEETVA | Negative |
| P20112 | IFFLLCLAGKALAAPQQEAL | Negative |
| P20112 | FFLLCLAGKALAAPQQEALP | Negative |
| P20112 | EALPDETEVVEETVAEVPVG | Negative |
| P20112 | DETEVVEETVAEVPVGANPV | Negative |
| P20112 | LLCLAGKALAAPQQEALPDE | Negative |
| P20112 | LCLAGKALAAPQQEALPDET | Negative |
| P20112 | QQEALPDETEVVEETVAEVP | Negative |
| P20112 | LAAPQQEALPDETEVVEETV | Negative |
| P20112 | PQQEALPDETEVVEETVAEV | Negative |
| P20112 | PDETEVVEETVAEVPVGANP | Negative |
| P20112 | TEVVEETVAEVPVGANPVQV | Negative |
| P20112 | LAGKALAAPQQEALPDETEV | Negative |
| P20112 | AGKALAAPQQEALPDETEVV | Negative |
| P20112 | RAWIFFLLCLAGKALAAPQQ | Negative |
| P20112 | WIFFLLCLAGKALAAPQQEA | Negative |
| P20112 | ALAAPQQEALPDETEVVEET | Negative |
| P20112 | APQQEALPDETEVVEETVAE | Negative |
| P20112 | KALAAPQQEALPDETEVVEE | Negative |
| P20112 | MRAWIFFLLCLAGKALAAPQ | Negative |
| P20112 | VVEETVAEVPVGANPVQVEV | Negative |
| P20112 | CLAGKALAAPQQEALPDETE | Negative |
| P20112 | FLLCLAGKALAAPQQEALPD | Negative |
| P20112 | LPDETEVVEETVAEVPVGAN | Negative |

|        |                      |          |
|--------|----------------------|----------|
| P20112 | ETEVEETVAEVPVGANPVQ  | Negative |
| P20112 | QEALPDETEVVEETVAEVPV | Negative |
| P20142 | VPLKKFKSIRETMKEKGLLG | Negative |
| P20142 | AVVKVPLKKFKSIRETMKEK | Negative |
| P20142 | VVVLVCLQLLEAAVVKVPLK | Negative |
| P20142 | SIRETMKEKGLLGEFLRTHK | Negative |
| P20142 | KSIRETMKEKGLLGEFLRTH | Negative |
| P20142 | VLVCLQLLEAAVVKVPLKKF | Negative |
| P20142 | LQLEAAVVKVPLKKFKSIR  | Negative |
| P20142 | WMVVVLVCLQLLEAAVVKVP | Negative |
| P20142 | VVLVCLQLLEAAVVKVPLKK | Negative |
| P20142 | LVCLQLLEAAVVKVPLKKFK | Negative |
| P20142 | KVPLKKFKSIRETMKEKGLL | Negative |
| P20142 | VVKVPLKKFKSIRETMKEKG | Negative |
| P20142 | AAVVKVPLKKFKSIRETMKE | Negative |
| P20142 | FKSIRETMKEKGLLGEFLRT | Negative |
| P20142 | QLEAAVVKVPLKKFKSIRE  | Negative |
| P20142 | LLEAAVVKVPLKKFKSIRET | Negative |
| P20142 | VCLQLLEAAVVKVPLKKFKS | Negative |
| P20142 | CLQLLEAAVVKVPLKKFKSI | Negative |
| P20142 | VKVPLKKFKSIRETMKEKGL | Negative |
| P20142 | LKKFKSIRETMKEKGLLGEF | Negative |
| P20142 | EAAVVKVPLKKFKSIRETMK | Negative |
| P20142 | KKFKSIRETMKEKGLLGEFL | Negative |
| P20142 | MKWMVVVLVCLQLLEAAVVK | Negative |
| P20142 | KFKSIRETMKEKGLLGEFLR | Negative |
| P20142 | RETMKEKGLLGEFLRTHKYD | Negative |
| P20142 | IRETMKEKGLLGEFLRTHKY | Negative |
| P20142 | LEAAVVKVPLKKFKSIRETM | Negative |
| P20142 | PLKKFKSIRETMKEKGLLGE | Negative |
| P20142 | MVVVLVCLQLLEAAVVKVPL | Negative |
| P20155 | LIPQFGLFSKYRTPNCSQYR | Negative |
| P20155 | ALSVLRLALLLLAVTFAASL | Negative |
| P20155 | FAASLIPQFGLFSKYRTPNC | Negative |
| P20155 | SVLRLALLLLAVTFAASLIP | Negative |
| P20155 | VLRLALLLLAVTFAASLIPQ | Negative |
| P20155 | RLALLLLAVTFAASLIPQFG | Negative |
| P20155 | LRLALLLLAVTFAASLIPQF | Negative |
| P20155 | LALLLLAVTFAASLIPQFGL | Negative |
| P20155 | IPQFGLFSKYRTPNCSQYRL | Negative |
| P20155 | TFAASLIPQFGLFSKYRTPN | Negative |
| P20155 | LSVLRLALLLLAVTFAASLI | Negative |
| P20155 | AASLIPQFGLFSKYRTPNCS | Negative |
| P20155 | PQFGLFSKYRTPNCSQYRLP | Negative |
| P20155 | KYRTPNCSQYRLPGCPRHFN | Negative |
| P20155 | FGLFSKYRTPNCSQYRLPGC | Negative |

|        |                      |          |
|--------|----------------------|----------|
| P20155 | LAVTFAASLIPQFGLFSKYR | Negative |
| P20155 | QFGLFSKYRTPNCSQYRLPG | Negative |
| P20155 | AVTFAASLIPQFGLFSKYRT | Negative |
| P20155 | GLFSKYRTPNCSQYRLPGCP | Negative |
| P20155 | LLAVTFAASLIPQFGLFSK  | Negative |
| P20155 | LLAVTFAASLIPQFGLFSKY | Negative |
| P20155 | LFSKYRTPNCSQYRLPGCPR | Negative |
| P20155 | VTFAASLIPQFGLFSKYRTP | Negative |
| P20155 | ASLIPQFGLFSKYRTPNCSQ | Negative |
| P20155 | FSKYRTPNCSQYRLPGCPRH | Negative |
| P20155 | SKYRTPNCSQYRLPGCPRHF | Negative |
| P20155 | SLIPQFGLFSKYRTPNCSQY | Negative |
| P20155 | MALSVLRLALLLAVTFAAS  | Negative |
| P20155 | LLLAVTFAASLIPQFGLFS  | Negative |
| P20160 | SPLLDIVGGRKARPRQFPFL | Negative |
| P20160 | LLASSRAGSSPLLDIVGGRK | Negative |
| P20160 | ALLAGLLASSRAGSSPLLDI | Negative |
| P20160 | LDIVGGRKARPRQFPFLASI | Negative |
| P20160 | MTRLTVLALLAGLLASSRAG | Negative |
| P20160 | SRAGSSPLLDIVGGRKARPR | Negative |
| P20160 | VGGRKARPRQFPFLASIQNQ | Negative |
| P20160 | TRLTVLALLAGLLASSRAGS | Negative |
| P20160 | LTVLALLAGLLASSRAGSSP | Negative |
| P20160 | AGLLASSRAGSSPLLDIVGG | Negative |
| P20160 | LALLAGLLASSRAGSSPLLD | Negative |
| P20160 | GRKARPRQFPFLASIQNQGR | Negative |
| P20160 | GLASSRAGSSPLLDIVGGR  | Negative |
| P20160 | LASSRAGSSPLLDIVGGRKA | Negative |
| P20160 | LLAGLLASSRAGSSPLLDIV | Negative |
| P20160 | SSRAGSSPLLDIVGGRKARP | Negative |
| P20160 | PLLDIVGGRKARPRQFPFLA | Negative |
| P20160 | LLDIVGGRKARPRQFPFLAS | Negative |
| P20160 | LAGLLASSRAGSSPLLDIVG | Negative |
| P20160 | IVGGRKARPRQFPFLASIQN | Negative |
| P20160 | RAGSSPLLDIVGGRKARPRQ | Negative |
| P20160 | GSSPLLDIVGGRKARPRQFP | Negative |
| P20160 | SSPLLDIVGGRKARPRQFPF | Negative |
| P20160 | DIVGGRKARPRQFPFLASIQ | Negative |
| P20160 | VLALLAGLLASSRAGSSPLL | Negative |
| P20160 | RLTVLALLAGLLASSRAGSS | Negative |
| P20160 | ASSRAGSSPLLDIVGGRKAR | Negative |
| P20160 | AGSSPLLDIVGGRKARPRQF | Negative |
| P20160 | GGRKARPRQFPFLASIQNQG | Negative |
| P20362 | YLLTASIPLDCKEEQGSLSR | Negative |
| P20362 | TVKQQGVWAALLWPYLLTAS | Negative |
| P20362 | LDCKEEQGSLSRCPSISQEK | Negative |

|        |                      |          |
|--------|----------------------|----------|
| P20362 | IPLDCKEEQGSLSRCPSISQ | Negative |
| P20362 | LTASIPLDCKEEQGSLSRCP | Negative |
| P20362 | WAALLWPYLLTASIPLDCKE | Negative |
| P20362 | VKQQGVWAALLWPYLLTASI | Negative |
| P20362 | KQQGVWAALLWPYLLTASIP | Negative |
| P20362 | LLTASIPLDCKEEQGSLSRC | Negative |
| P20362 | PYLLTASIPLDCKEEQGSLS | Negative |
| P20362 | AALLWPYLLTASIPLDCKEE | Negative |
| P20362 | MNMMTVKQQGVWAALLWPYL | Negative |
| P20362 | QGVWAALLWPYLLTASIPLD | Negative |
| P20362 | KEEQGSLSRCPSISQEKLLD | Negative |
| P20362 | SIPLDCKEEQGSLSRCPSIS | Negative |
| P20362 | TASIPLDCKEEQGSLSRCPS | Negative |
| P20362 | MTVKQQGVWAALLWPYLLTA | Negative |
| P20362 | ASIPLDCKEEQGSLSRCPSI | Negative |
| P20362 | DCKEEQGSLSRCPSISQEKL | Negative |
| P20362 | WPYLLTASIPLDCKEEQGS  | Negative |
| P20362 | MMTVKQQGVWAALLWPYLLT | Negative |
| P20362 | NMMTVKQQGVWAALLWPYLL | Negative |
| P20362 | ALLWPYLLTASIPLDCKEEQ | Negative |
| P20362 | CKEEQGSLSRCPSISQEKLL | Negative |
| P20362 | PLDCKEEQGSLSRCPSISQE | Negative |
| P20362 | LWPYLLTASIPLDCKEEQGS | Negative |
| P20362 | LLWPYLLTASIPLDCKEEQG | Negative |
| P20362 | QQGVWAALLWPYLLTASIPL | Negative |
| P20362 | VWAALLWPYLLTASIPLDCK | Negative |
| P20462 | EGTYVQVIAVDKEFPEDEI  | Negative |
| P20462 | FSIIHADDFAFSEFKPSEGT | Negative |
| P20462 | AFSEFKPSEGTYVQVIAVD  | Negative |
| P20462 | LSLFSIIHADDFAFSEFKPS | Negative |
| P20462 | IHADDFAFSEFKPSEGTYV  | Negative |
| P20462 | HADDFAFSEFKPSEGTYVQ  | Negative |
| P20462 | ADDFAFSEFKPSEGTYVQV  | Negative |
| P20462 | MRVLFLTISLSLFSIIHADD | Negative |
| P20462 | KPSEGTYVQVIAVDKEFPE  | Negative |
| P20462 | RVLFLTISLSLFSIIHADD  | Negative |
| P20462 | FSEFKPSEGTYVQVIAVDK  | Negative |
| P20462 | FLTISLSLFSIIHADDFAFS | Negative |
| P20462 | PSEGTYVQVIAVDKEFPED  | Negative |
| P20462 | TISLSLFSIIHADDFAFSEF | Negative |
| P20462 | VLFLTISLSLFSIIHADDFA | Negative |
| P20462 | SLSLFSIIHADDFAFSEFKP | Negative |
| P20462 | ISLSLFSIIHADDFAFSEFK | Negative |
| P20462 | SLFSIIHADDFAFSEFKPSE | Negative |
| P20462 | IIHADDFAFSEFKPSEGTY  | Negative |
| P20462 | FAFSEFKPSEGTYVQVIAV  | Negative |

|        |                       |          |
|--------|-----------------------|----------|
| P20462 | LTISLSLFSIIHADDFAFSE  | Negative |
| P20462 | EFKPSEGTYYYVQVIAVDKEF | Negative |
| P20462 | SEGTYYYVQVIAVDKEFPEDE | Negative |
| P20462 | DDFAFSEFKPSEGTYYYVQVI | Negative |
| P20462 | LFSIIHADDFAFSEFKPSEG  | Negative |
| P20462 | SEFKPSEGTYYYVQVIAVDKE | Negative |
| P20462 | SIIHADDFAFSEFKPSEGTY  | Negative |
| P20462 | DFAFSEFKPSEGTYYYVQVIA | Negative |
| P20462 | FKPSEGTYYYVQVIAVDKEFP | Negative |
| P20474 | LLVGVEGSLIEFAKMILEET  | Negative |
| P20474 | EGSLIEFAKMILEETKRLPF  | Negative |
| P20474 | LVGVEGSLIEFAKMILEETK  | Negative |
| P20474 | VGVEGSLIEFAKMILEETKR  | Negative |
| P20474 | KRLPFPYYTTYGCYCGWGGQ  | Negative |
| P20474 | LIEFAKMILEETKRLPFPYY  | Negative |
| P20474 | LEETKRLPFPYYTTYGCYCG  | Negative |
| P20474 | ETKRLPFPYYTTYGCYCGWG  | Negative |
| P20474 | GVEGSLIEFAKMILEETKRL  | Negative |
| P20474 | TKRLPFPYYTTYGCYCGWGG  | Negative |
| P20474 | FAKMILEETKRLPFPYYTTY  | Negative |
| P20474 | GSLIEFAKMILEETKRLPFP  | Negative |
| P20474 | IMAVLLVGVEGSLIEFAKMI  | Negative |
| P20474 | AKMILEETKRLPFPYYTTYG  | Negative |
| P20474 | VLLVGVEGSLIEFAKMILEE  | Negative |
| P20474 | TLWIMAVLLVGVEGSLIEFA  | Negative |
| P20474 | VEGSLIEFAKMILEETKRLP  | Negative |
| P20474 | MRTLWIMAVLLVGVEGSLIE  | Negative |
| P20474 | SLIEFAKMILEETKRLPFPY  | Negative |
| P20474 | EETKRLPFPYYTTYGCYCGW  | Negative |
| P20474 | AVLLVGVEGSLIEFAKMILE  | Negative |
| P20474 | IEFAKMILEETKRLPFPYYT  | Negative |
| P20474 | KMILEETKRLPFPYYTTYGC  | Negative |
| P20474 | MAVLLVGVEGSLIEFAKMIL  | Negative |
| P20474 | ILEETKRLPFPYYTTYGCYC  | Negative |
| P20474 | MILEETKRLPFPYYTTYGCY  | Negative |
| P20474 | EFAKMILEETKRLPFPYYTT  | Negative |
| P20474 | LWIMAVLLVGVEGSLIEFAK  | Negative |
| P20474 | WIMAVLLVGVEGSLIEFAKM  | Negative |
| P20476 | LIMKVAGRSGVWYYGSYGCF  | Negative |
| P20476 | KVAGRSGVWYYGSYGCFCA   | Negative |
| P20476 | MRTLWIMAVLLVGVEGHLMQ  | Negative |
| P20476 | IMKVAGRSGVWYYGSYGCF   | Negative |
| P20476 | FETLIMKVAGRSGVWYYGSY  | Negative |
| P20476 | HLMQFETLIMKVAGRSGVWY  | Negative |
| P20476 | MKVAGRSGVWYYGSYGCF    | Negative |
| P20476 | VEGHLMQFETLIMKVAGRSG  | Negative |



|        |                      |          |
|--------|----------------------|----------|
| P20476 | MAVLLVGVEGHLMQFETLIM | Negative |
| P20476 | VLLVGVEGHLMQFETLIMKV | Negative |
| P20476 | LLVGVEGHLMQFETLIMKVA | Negative |
| P20476 | WIMAVLLVGVEGHLMQFETL | Negative |
| P20476 | TLWIMAVLLVGVEGHLMQFE | Negative |
| P20476 | LMQFETLIMKVAGRSGVWYY | Negative |
| P20476 | TLIMKVAGRSGVWYYGSYGC | Negative |
| P20476 | GVEGHLMQFETLIMKVAGRS | Negative |
| P20476 | LWIMAVLLVGVEGHLMQFET | Negative |
| P20476 | VAGRSGVWYYGSYGCFCGAG | Negative |
| P20476 | AGRSGVWYYGSYGCFCGAGG | Negative |
| P20476 | EGHLMQFETLIMKVAGRSGV | Negative |
| P20476 | VGVEGHLMQFETLIMKVAGR | Negative |
| P20476 | ETLIMKVAGRSGVWYYGSYG | Negative |
| P20476 | AVLLVGVEGHLMQFETLIMK | Negative |
| P20476 | QFETLIMKVAGRSGVWYYGS | Negative |
| P20476 | MQFETLIMKVAGRSGVWYYG | Negative |
| P20476 | GRSGVWYYGSYGCFCGAGGQ | Negative |
| P20476 | IMAVLLVGVEGHLMQFETLI | Negative |
| P20476 | LVGVEGHLMQFETLIMKVAG | Negative |
| P20476 | GHLMQFETLIMKVAGRSGVW | Negative |
| P20507 | LLVALALAGCAQACIYKFGT | Negative |
| P20507 | LAGCAQACIYKFGTSPDSKA | Negative |
| P20507 | GTSPDSKATVSGDHDHGLN  | Negative |
| P20507 | ARTGALLLVALALAGCAQAC | Negative |
| P20507 | RTGALLLVALALAGCAQACI | Negative |
| P20507 | TSPDSKATVSGDHDHGLNG  | Negative |
| P20507 | KFGTSPDSKATVSGDHDHG  | Negative |
| P20507 | LLLVALALAGCAQACIYKFG | Negative |
| P20507 | AGCAQACIYKFGTSPDSKAT | Negative |
| P20507 | QACIYKFGTSPDSKATVSGD | Negative |
| P20507 | GALLLVALALAGCAQACIYK | Negative |
| P20507 | FGTSPDSKATVSGDHDHGL  | Negative |
| P20507 | GCAQACIYKFGTSPDSKATV | Negative |
| P20507 | ACIYKFGTSPDSKATVSGDH | Negative |
| P20507 | CAQACIYKFGTSPDSKATVS | Negative |
| P20507 | ALALAGCAQACIYKFGTSPD | Negative |
| P20507 | PDSKATVSGDHDHGLNGEN  | Negative |
| P20507 | ALAGCAQACIYKFGTSPDSK | Negative |
| P20507 | AQACIYKFGTSPDSKATVSG | Negative |
| P20507 | VALALAGCAQACIYKFGTSP | Negative |
| P20507 | DSKATVSGDHDHGLNGENW  | Negative |
| P20507 | CIYKFGTSPDSKATVSGDHW | Negative |
| P20507 | LALAGCAQACIYKFGTSPDS | Negative |
| P20507 | IYKFGTSPDSKATVSGDHDW | Negative |
| P20507 | LVALALAGCAQACIYKFGTS | Negative |

|        |                       |          |
|--------|-----------------------|----------|
| P20507 | SPDSKATVSGDHWHDHGLNGE | Negative |
| P20507 | YKFGTSPDSKATVSGDHWHDH | Negative |
| P20507 | TGALLLVALALAGCAQACIY  | Negative |
| P20507 | MARTGALLLVALALAGCAQA  | Negative |
| P20626 | MLPVGNAAPVVHNPASTA    | Negative |
| P20626 | GNAAAPVVHNPASTANRPV   | Negative |
| P20626 | AAPVVHNPASTANRPVYAIA  | Negative |
| P20626 | IIMAIMLPVGNAAPVVHN    | Negative |
| P20626 | PVVHNPASTANRPVYAIAHR  | Negative |
| P20626 | APVVHNPASTANRPVYAIAH  | Negative |
| P20626 | VVLFLSIIMAIMLPVGNAAP  | Negative |
| P20626 | PVGNAAPVVHNPASTANR    | Negative |
| P20626 | AAAPVVHNPASTANRPVYAI  | Negative |
| P20626 | VHNPASTANRPVYAIAHRVL  | Negative |
| P20626 | VLFLSIIMAIMLPVGNAAP   | Negative |
| P20626 | LFLSIIMAIMLPVGNAAP    | Negative |
| P20626 | HNPASTANRPVYAIAHRVLT  | Negative |
| P20626 | MREKVVLFLSIIMAIMLPVG  | Negative |
| P20626 | IMLPVGNAAPVVHNPAST    | Negative |
| P20626 | IMAIMLPVGNAAPVVHNP    | Negative |
| P20626 | FLSIIMAIMLPVGNAAPV    | Negative |
| P20626 | VVHNPASTANRPVYAIAHRV  | Negative |
| P20626 | REKVVLFLSIIMAIMLPVGN  | Negative |
| P20626 | VGNAAPVVHNPASTANRP    | Negative |
| P20626 | LPVGNAAPVVHNPASTAN    | Negative |
| P20626 | LSIIMAIMLPVGNAAPVV    | Negative |
| P20626 | KVVLFLSIIMAIMLPVGNA   | Negative |
| P20626 | MAIMLPVGNAAPVVHNPA    | Negative |
| P20626 | EKVVLFLSIIMAIMLPVGNA  | Negative |
| P20626 | AAAPVVHNPASTANRPVYA   | Negative |
| P20626 | NAAAPVVHNPASTANRPVY   | Negative |
| P20626 | NPASTANRPVYAIAHRVLT   | Negative |
| P20626 | AIMLPVGNAAPVVHNPA     | Negative |
| P20656 | TLDLVNPTAGQYSSFVDKIR  | Negative |
| P20656 | SAWTTTDAVTSITLTLVNPT  | Negative |
| P20656 | TSITLTLVNPTAGQYSSFVD  | Negative |
| P20656 | AVTSITLTLVNPTAGQYSSF  | Negative |
| P20656 | SITLTLVNPTAGQYSSFVDK  | Negative |
| P20656 | LLQFSAWTTTDAVTSITLTL  | Negative |
| P20656 | VVATIAWILLQFSAWTTTDA  | Negative |
| P20656 | YVVATIAWILLQFSAWTTTD  | Negative |
| P20656 | QFSAWTTTDAVTSITLTLVN  | Negative |
| P20656 | KIYVVATIAWILLQFSAWTT  | Negative |
| P20656 | WILLQFSAWTTTDAVTSITL  | Negative |
| P20656 | ILLQFSAWTTTDAVTSITLD  | Negative |
| P20656 | TIAWILLQFSAWTTTDAVTS  | Negative |

|        |                       |          |
|--------|-----------------------|----------|
| P20656 | TDAVTSITLDLVNPTAGQYS  | Negative |
| P20656 | MKIYVVATIAWILLQFSAWT  | Negative |
| P20656 | LQFSAWTTTDAVTSITLDLV  | Negative |
| P20656 | DAVTSITLDLVNPTAGQYSS  | Negative |
| P20656 | IYVVATIAWILLQFSAWTTT  | Negative |
| P20656 | ITLDLVNPTAGQYSSFVDKI  | Negative |
| P20656 | LDLVNPTAGQYSSFVDKIRN  | Negative |
| P20656 | FSAWTTTDAVTSITLDLVNP  | Negative |
| P20656 | WTTTDAVTSITLDLVNPTAG  | Negative |
| P20656 | AWTTTDAVTSITLDLVNPTA  | Negative |
| P20656 | TTTDAVTSITLDLVNPTAGQ  | Negative |
| P20656 | VATIAWILLQFSAWTTTDAV  | Negative |
| P20656 | IAWILLQFSAWTTTDAVTSI  | Negative |
| P20656 | ATIAWILLQFSAWTTTDAVT  | Negative |
| P20656 | VTSITLDLVNPTAGQYSSFV  | Negative |
| P20656 | TTDAVTSITLDLVNPTAGQY  | Negative |
| P20713 | PNVIVIIADDMGYSDISPF   | Negative |
| P20713 | NKKAMAAAVSMILAGGAHAA  | Negative |
| P20713 | QERPNNVIVIIADDMGYSDIS | Negative |
| P20713 | AQQERPNNVIVIIADDMGYSD | Negative |
| P20713 | NVIVIIADDMGYSDISPF    | Negative |
| P20713 | GAHAAQQERPNNVIVIIADDM | Negative |
| P20713 | MILAGGAHAAQQERPNNVIV  | Negative |
| P20713 | AMAAAVSMILAGGAHAAQQE  | Negative |
| P20713 | AAQQERPNNVIVIIADDMGY  | Negative |
| P20713 | MNKKAMAAAVSMILAGGAHA  | Negative |
| P20713 | KAMAAAVSMILAGGAHAAQQ  | Negative |
| P20713 | KKAMAAAVSMILAGGAHAAQ  | Negative |
| P20713 | HAAQQERPNNVIVIIADDMGY | Negative |
| P20713 | VIIADDMGYSDISPF       | Negative |
| P20713 | RPNVIVIIADDMGYSDISPF  | Negative |
| P20713 | AAVSMILAGGAHAAQQERP   | Negative |
| P20713 | VIVIIADDMGYSDISPF     | Negative |
| P20713 | IVIIADDMGYSDISPF      | Negative |
| P20713 | AHAAQQERPNNVIVIIADDMG | Negative |
| P20713 | ERPNNVIVIIADDMGYSDIS  | Negative |
| P20713 | VSMILAGGAHAAQQERPNNV  | Negative |
| P20713 | ILAGGAHAAQQERPNNVIV   | Negative |
| P20713 | GGAHAAQQERPNNVIVIIAD  | Negative |
| P20713 | SMILAGGAHAAQQERPNNV   | Negative |
| P20713 | AGGAHAAQQERPNNVIVIIAD | Negative |
| P20713 | AAAVSMILAGGAHAAQQERP  | Negative |
| P20713 | AVSMILAGGAHAAQQERPNN  | Negative |
| P20713 | QQERPNNVIVIIADDMGYSDI | Negative |
| P20713 | LAGGAHAAQQERPNNVIVIIA | Negative |
| P20740 | LSFFCLTVRKMWLKFI      | Negative |

|        |                       |          |
|--------|-----------------------|----------|
| P20740 | SFFCLTVRKMWLKFILAILL  | Negative |
| P20740 | HCFLGREILSFFCLTVRKMW  | Negative |
| P20740 | FLGREILSFFCLTVRKMWLK  | Negative |
| P20740 | ILLHAAAGKEPEPQYVLMV   | Negative |
| P20740 | EILSFFCLTVRKMWLKFILA  | Negative |
| P20740 | VRKMWLKFILAILLLHAAAG  | Negative |
| P20740 | FCLTVRKMWLKFILAILLLH  | Negative |
| P20740 | LGREILSFFCLTVRKMWLKF  | Negative |
| P20740 | MWLKFILAILLLHAAAGKEP  | Negative |
| P20740 | RKMWLKFILAILLLHAAAGK  | Negative |
| P20740 | FFCLTVRKMWLKFILAILLL  | Negative |
| P20740 | TVRKMWLKFILAILLLHAAA  | Negative |
| P20740 | LAILLLHAAAGKEPEPQYVL  | Negative |
| P20740 | WLKFILAILLLHAAAGKEPE  | Negative |
| P20740 | ILSFFCLTVRKMWLKFILAI  | Negative |
| P20740 | KFILAILLLHAAAGKEPEPQ  | Negative |
| P20740 | FILAILLLHAAAGKEPEPQY  | Negative |
| P20740 | KMWLKFILAILLLHAAAGKE  | Negative |
| P20740 | MHCFLGREILSFFCLTVRKM  | Negative |
| P20740 | LLHAAAGKEPEPQYVLMVPA  | Negative |
| P20740 | REILSFFCLTVRKMWLKFIL  | Negative |
| P20740 | LLLHAAAGKEPEPQYVLMVP  | Negative |
| P20740 | CFLGREILSFFCLTVRKMWL  | Negative |
| P20740 | ILAILLLHAAAGKEPEPQYV  | Negative |
| P20740 | GREILSFFCLTVRKMWLKFI  | Negative |
| P20740 | AILLLHAAAGKEPEPQYVLM  | Negative |
| P20740 | CLTVRKMWLKFILAILLLHA  | Negative |
| P20740 | LTVRKMWLKFILAILLLHAA  | Negative |
| P20774 | LLVPLIKPAPPTQQDSRIIY  | Negative |
| P20774 | KPAPPTQQDSRIIYDYGTDN  | Negative |
| P20774 | MKTLQSTLLLLLVPLIKPA   | Negative |
| P20774 | IYDYGTDNFEEISIFSQDYED | Negative |
| P20774 | RIIYDYGTDNFEEISIFSQDY | Negative |
| P20774 | LLLLVPLIKPAPPTQQDSRI  | Negative |
| P20774 | PLIKPAPPTQQDSRIIYDYG  | Negative |
| P20774 | LLLLLVPLIKPAPPTQQDSR  | Negative |
| P20774 | PPTQQDSRIIYDYGTDNFEE  | Negative |
| P20774 | QDSRIIYDYGTDNFEEISIFS | Negative |
| P20774 | TLLLLLVPLIKPAPPTQQD   | Negative |
| P20774 | KTLQSTLLLLLVPLIKPAP   | Negative |
| P20774 | QSTLLLLLVPLIKPAPPTQ   | Negative |
| P20774 | LQSTLLLLLVPLIKPAPPT   | Negative |
| P20774 | SRIIYDYGTDNFEEISIFSQD | Negative |
| P20774 | PTQQDSRIIYDYGTDNFEE   | Negative |
| P20774 | PAPPTQQDSRIIYDYGTDNF  | Negative |
| P20774 | TLQSTLLLLLVPLIKPAPP   | Negative |

|        |                      |          |
|--------|----------------------|----------|
| P20774 | LLLVPLIKPAPPTQQDSRII | Negative |
| P20774 | LLLLLLVPLIKPAPPTQQDS | Negative |
| P20774 | IKPAPPTQQDSRIIYDYGTD | Negative |
| P20774 | APPTQQDSRIIYDYGTDNFE | Negative |
| P20774 | LVPLIKPAPPTQQDSRIIYD | Negative |
| P20774 | LIKAPPTQQDSRIIYDYGT  | Negative |
| P20774 | DSRIIYDYGTDNFEESIFSQ | Negative |
| P20774 | TQQDSRIIYDYGTDNFEESI | Negative |
| P20774 | QQDSRIIYDYGTDNFEESIF | Negative |
| P20774 | VPLIKPAPPTQQDSRIIYDY | Negative |
| P20774 | IYDYGTDNFEESIFSQDYE  | Negative |
| P20797 | IMKNLSNNFGKAMDQCKDEL | Negative |
| P20797 | SSPEIMKNLSNNFGKAMDQC | Negative |
| P20797 | NLVHSSPEIMKNLSNNFGKA | Negative |
| P20797 | MLRKISLLLLPVFVAINLVH | Negative |
| P20797 | INLVHSSPEIMKNLSNNFGK | Negative |
| P20797 | LSNNFGKAMDQCKDELSLPD | Negative |
| P20797 | LVHSSPEIMKNLSNNFGKAM | Negative |
| P20797 | ISLLLLPVFVAINLVHSSPE | Negative |
| P20797 | SPEIMKNLSNNFGKAMDQCK | Negative |
| P20797 | SLLLLPVFVAINLVHSSPEI | Negative |
| P20797 | EIMKNLSNNFGKAMDQCKDE | Negative |
| P20797 | PVFVAINLVHSSPEIMKNLS | Negative |
| P20797 | FVAINLVHSSPEIMKNLSNN | Negative |
| P20797 | MKNLSNNFGKAMDQCKDELS | Negative |
| P20797 | VHSSPEIMKNLSNNFGKAMD | Negative |
| P20797 | KISLLLLPVFVAINLVHSSP | Negative |
| P20797 | LPVFVAINLVHSSPEIMKNL | Negative |
| P20797 | VFVAINLVHSSPEIMKNLSN | Negative |
| P20797 | LLLPVFVAINLVHSSPEIMK | Negative |
| P20797 | PEIMKNLSNNFGKAMDQCKD | Negative |
| P20797 | AINLVHSSPEIMKNLSNNFG | Negative |
| P20797 | KNLSNNFGKAMDQCKDELSL | Negative |
| P20797 | LRKISLLLLPVFVAINLVHS | Negative |
| P20797 | LLPVFVAINLVHSSPEIMKN | Negative |
| P20797 | HSSPEIMKNLSNNFGKAMDQ | Negative |
| P20797 | SNNFGKAMDQCKDELSLPDS | Negative |
| P20797 | RKISLLLLPVFVAINLVHSS | Negative |
| P20797 | NLSNNFGKAMDQCKDELSLP | Negative |
| P20797 | VAINLVHSSPEIMKNLSNNF | Negative |
| P20827 | LAAADRHTVFWNSSNPKFRN | Negative |
| P20827 | PKFRNEDYTIHVQLNDYVDI | Negative |
| P20827 | EFLWAPLLGLCCSLAAADRH | Negative |
| P20827 | AADRHTVFWNSSNPKFRNED | Negative |
| P20827 | LLGLCCSLAAADRHTVFWNS | Negative |
| P20827 | ADRHTVFWNSSNPKFRNEDY | Negative |

|        |                      |          |
|--------|----------------------|----------|
| P20827 | WAPLLGLCCSLAAADRHTVF | Negative |
| P20827 | LCCSLAAADRHTVFWNSSNP | Negative |
| P20827 | SSNPKFRNEDYTIHVQLNDY | Negative |
| P20827 | CSLAAADRHTVFWNSSNPKF | Negative |
| P20827 | LGLCCSLAAADRHTVFWNSS | Negative |
| P20827 | NSSNPKFRNEDYTIHVQLND | Negative |
| P20827 | VFWNSSNPKFRNEDYTIHVQ | Negative |
| P20827 | GLCCSLAAADRHTVFWNSSN | Negative |
| P20827 | MEFLWAPLLGLCCSLAAADR | Negative |
| P20827 | DRHTVFWNSSNPKFRNEDYT | Negative |
| P20827 | SLAAADRHTVFWNSSNPKFR | Negative |
| P20827 | SNPKFRNEDYTIHVQLNDYV | Negative |
| P20827 | WNSSNPKFRNEDYTIHVQLN | Negative |
| P20827 | APLLGLCCSLAAADRHTVFW | Negative |
| P20827 | NPKFRNEDYTIHVQLNDYVD | Negative |
| P20827 | PLLGLCCSLAAADRHTVFWN | Negative |
| P20827 | TVFWNSSNPKFRNEDYTIHV | Negative |
| P20827 | FWNSSNPKFRNEDYTIHVQL | Negative |
| P20827 | FLWAPLLGLCCSLAAADRHT | Negative |
| P20827 | HTVFWNSSNPKFRNEDYTIH | Negative |
| P20827 | AAADRHTVFWNSSNPKFRNE | Negative |
| P20827 | CCSLAAADRHTVFWNSSNPK | Negative |
| P20827 | RHTVFWNSSNPKFRNEDYTI | Negative |
| P20933 | RKSNLPVLLVPFLLCQALVR | Negative |
| P20933 | NLPVLLVPFLLCQALVRCSS | Negative |
| P20933 | LCQALVRCSSPLPLVVNTWP | Negative |
| P20933 | VRCSSPLPLVVNTWPFKNAT | Negative |
| P20933 | RCSSPLPLVVNTWPFKNATE | Negative |
| P20933 | LPVLLVPFLLCQALVRCSSP | Negative |
| P20933 | SPLPLVVNTWPFKNATEAAW | Negative |
| P20933 | PFLLCQALVRCSSPLPLVVN | Negative |
| P20933 | FLLCQALVRCSSPLPLVVNT | Negative |
| P20933 | PLVVNTWPFKNATEAAWRAL | Negative |
| P20933 | ARKSNLPVLLVPFLLCQALV | Negative |
| P20933 | SSPLPLVVNTWPFKNATEAA | Negative |
| P20933 | LLVPFLLCQALVRCSSPLPL | Negative |
| P20933 | LVRCSPLPLVVNTWPFKNA  | Negative |
| P20933 | LLCQALVRCSSPLPLVVNTW | Negative |
| P20933 | LPLVVNTWPFKNATEAAWRA | Negative |
| P20933 | CSSPLPLVVNTWPFKNATEA | Negative |
| P20933 | PLPLVVNTWPFKNATEAAWR | Negative |
| P20933 | PVLLVPFLLCQALVRCSSPL | Negative |
| P20933 | VPFLLCQALVRCSSPLPLVV | Negative |
| P20933 | LVVNTWPFKNATEAAWRALA | Negative |
| P20933 | CQALVRCSSPLPLVVNTWPF | Negative |
| P20933 | LVPFLLCQALVRCSSPLPLV | Negative |

|        |                      |          |
|--------|----------------------|----------|
| P20933 | QALVRCSSPLPLVVNTWPFK | Negative |
| P20933 | KSNLPVLLVPFLLCQALVRC | Negative |
| P20933 | MARKSNLPVLLVPFLLCQAL | Negative |
| P20933 | SNLPVLLVPFLLCQALVRCS | Negative |
| P20933 | ALVRCSSPLPLVVNTWPFKN | Negative |
| P20933 | VVNTWPFKNATEAAWRALAS | Negative |
| P20959 | RAGAGTMGAGPVVRCEPCDA | Negative |
| P20959 | ALTALTLLRGPPAARAGAGT | Negative |
| P20959 | ALWAAALTALTLLRGPPAAR | Negative |
| P20959 | WAAALTALTLLRGPPAARAG | Negative |
| P20959 | AARAGAGTMGAGPVVRCEPC | Negative |
| P20959 | PPAARAGAGTMGAGPVVRCE | Negative |
| P20959 | GTMGAGPVVRCEPCDARAVA | Negative |
| P20959 | RPALWAAALTALTLLRGPPA | Negative |
| P20959 | PAARAGAGTMGAGPVVRCEP | Negative |
| P20959 | PALWAAALTALTLLRGPPAA | Negative |
| P20959 | AGAGTMGAGPVVRCEPCDAR | Negative |
| P20959 | LRARPALWAAALTALTLLRG | Negative |
| P20959 | LWAAALTALTLLRGPPAARA | Negative |
| P20959 | AAALTALTLLRGPPAARAGA | Negative |
| P20959 | ALTLLRGPPAARAGAGTMGA | Negative |
| P20959 | LTLRGPPAARAGAGTMGAG  | Negative |
| P20959 | GAGTMGAGPVVRCEPCDARA | Negative |
| P20959 | ARPALWAAALTALTLLRGPP | Negative |
| P20959 | GPPAARAGAGTMGAGPVVRC | Negative |
| P20959 | LRGPPAARAGAGTMGAGPVV | Negative |
| P20959 | AGTMGAGPVVRCEPCDARAV | Negative |
| P20959 | LLRGPPAARAGAGTMGAGPV | Negative |
| P20959 | MLRARPALWAAALTALTLLR | Negative |
| P20959 | RARPALWAAALTALTLLRGP | Negative |
| P20959 | TALTLLRGPPAARAGAGTMG | Negative |
| P20959 | RGPPAARAGAGTMGAGPVVR | Negative |
| P20959 | ARAGAGTMGAGPVVRCEPCD | Negative |
| P20959 | AALTALTLLRGPPAARAGAG | Negative |
| P20959 | TLLRGPPAARAGAGTMGAGP | Negative |
| P21128 | GKIESCASRCNEKFNRDAAC | Negative |
| P21128 | LAVLCGLAWAGKIESCASRC | Negative |
| P21128 | NEKFNRDAACQCDDRCLWHG | Negative |
| P21128 | EKFNRDAACQCDDRCLWHGN | Negative |
| P21128 | MRACISLVAVLCGLAWAGK  | Negative |
| P21128 | AWAGKIESCASRCNEKFNRD | Negative |
| P21128 | ASRCNEKFNRDAACQCDDRC | Negative |
| P21128 | KIESCASRCNEKFNRDAACQ | Negative |
| P21128 | RACISLVAVLCGLAWAGKI  | Negative |
| P21128 | LCGLAWAGKIESCASRCNEK | Negative |
| P21128 | CASRCNEKFNRDAACQCDDR | Negative |

|        |                         |          |
|--------|-------------------------|----------|
| P21128 | ISLVLA VLCGLAWAGKIESC   | Negative |
| P21128 | GLAWAGKIESCASRCNEKFN    | Negative |
| P21128 | WAGKIESCASRCNEKFNRDA    | Negative |
| P21128 | SRCNEKFNRDAACQCRRCL     | Negative |
| P21128 | ESCASRCNEKFNRDAACQCD    | Negative |
| P21128 | SCASRCNEKFNRDAACQCDR    | Negative |
| P21128 | AVLCGLAWAGKIESCASRCN    | Negative |
| P21128 | VLAVLCGLAWAGKIESCASR    | Negative |
| P21128 | CNEKFNRDAACQCRRCLWH     | Negative |
| P21128 | RCNEKFNRDAACQCRRCLW     | Negative |
| P21128 | SLVLAVLCGLAWAGKIESCA    | Negative |
| P21128 | AGKIESCASRCNEKFNRDAA    | Negative |
| P21128 | VLCGLAWAGKIESCASRCNE    | Negative |
| P21128 | LVLAVLCGLAWAGKIESCAS    | Negative |
| P21128 | ACISLVLA VLCGLAWAGKIE   | Negative |
| P21128 | LAWAGKIESCASRCNEKFNR    | Negative |
| P21128 | CGLAWAGKIESCASRCNEKF    | Negative |
| P21128 | IESCASRCNEKFNRDAACQC    | Negative |
| P21163 | TEDRLALNAV NAPADNTVNI   | Negative |
| P21163 | GVDSATPV TEDRLALNAVNA   | Negative |
| P21163 | VDSATPV TEDRLALNAV NAP  | Negative |
| P21163 | GIVSCKGVDSATPV TEDRLA   | Negative |
| P21163 | VSCKGVDSATPV TEDRLALN   | Negative |
| P21163 | FSISAYLMAGIVSCKGVDSA    | Negative |
| P21163 | RKLLIFSISAYLMAGIVSCK    | Negative |
| P21163 | SAYLMAGIVSCKGVDSATPV    | Negative |
| P21163 | SCKGVDSATPV TEDRLALNA   | Negative |
| P21163 | LIFSISAYLMAGIVSCKGVD    | Negative |
| P21163 | VTEDRLALNAV NAPADNTVN   | Negative |
| P21163 | MAGIVSCKGVDSATPV TEDR   | Negative |
| P21163 | LMAGIVSCKGVDSATPV TED   | Negative |
| P21163 | KGVD SATPV TEDRLALNAV N | Negative |
| P21163 | TPV TEDRLALNAV NAPADNT  | Negative |
| P21163 | SISAYLMAGIVSCKGVDSAT    | Negative |
| P21163 | KLLIFSISAYLMAGIVSCKG    | Negative |
| P21163 | YLMAGIVSCKGVDSATPV TE   | Negative |
| P21163 | SATPV TEDRLALNAV NAPAD  | Negative |
| P21163 | PV TEDRLALNAV NAPADNTV  | Negative |
| P21163 | AGIVSCKGVDSATPV TEDRL   | Negative |
| P21163 | ISAYLMAGIVSCKGVDSATP    | Negative |
| P21163 | CKGVDSATPV TEDRLALNAV   | Negative |
| P21163 | DSATPV TEDRLALNAV NAPA  | Negative |
| P21163 | IFSISAYLMAGIVSCKGVDS    | Negative |
| P21163 | LLIFSISAYLMAGIVSCKGV    | Negative |
| P21163 | MRKLLIFSISAYLMAGIVSC    | Negative |
| P21163 | AYLMAGIVSCKGVDSATPVT    | Negative |



|        |                       |          |
|--------|-----------------------|----------|
| P21163 | IVSCKGVDSATPVTEDRLAL  | Negative |
| P21171 | SASTVVVEAGDTLWGIAQSK  | Negative |
| P21171 | STVVVEAGDTLWGIAQSKGT  | Negative |
| P21171 | MKKATIAATAGIAVTAF AAP | Negative |
| P21171 | AGIAVTAF APTIASASTVV  | Negative |
| P21171 | ASASTVVVEAGDTLWGIAQS  | Negative |
| P21171 | IAATAGIAVTAF APTIASA  | Negative |
| P21171 | TAF APTIASASTVVVEAGD  | Negative |
| P21171 | KATIAATAGIAVTAF APTI  | Negative |
| P21171 | MNMKKATIAATAGIAVTAF A | Negative |
| P21171 | IASASTVVVEAGDTLWGIAQ  | Negative |
| P21171 | AVTAF APTIASASTVVVEA  | Negative |
| P21171 | ASTVVVEAGDTLWGIAQSKG  | Negative |
| P21171 | FAPTIASASTVVVEAGDTL   | Negative |
| P21171 | TIAATAGIAVTAF APTIAS  | Negative |
| P21171 | ATAGIAVTAF APTIASAST  | Negative |
| P21171 | NMKKATIAATAGIAVTAF AA | Negative |
| P21171 | KKATIAATAGIAVTAF APT  | Negative |
| P21171 | APTIASASTVVVEAGDTLWG  | Negative |
| P21171 | VVVEAGDTLWGIAQSKGTTV  | Negative |
| P21171 | AATAGIAVTAF APTIASAS  | Negative |
| P21171 | PTIASASTVVVEAGDTLWGI  | Negative |
| P21171 | TAGIAVTAF APTIASASTV  | Negative |
| P21171 | ATIAATAGIAVTAF APTIA  | Negative |
| P21171 | IAVTAF APTIASASTVVVE  | Negative |
| P21171 | TVVVEAGDTLWGIAQSKGTT  | Negative |
| P21171 | AAPTIASASTVVVEAGDTLW  | Negative |
| P21171 | VTAF APTIASASTVVVEAG  | Negative |
| P21171 | AF APTIASASTVVVEAGDT  | Negative |
| P21171 | TIASASTVVVEAGDTLWGIA  | Negative |
| P21175 | AAMAIAGFASYSMAADTIKI  | Negative |
| P21175 | KGTQRLSRLFAAMAIAGFAS  | Negative |
| P21175 | AADTIKIALAGPVTGPVAQY  | Negative |
| P21175 | RLSRLFAAMAIAGFASYSMA  | Negative |
| P21175 | IKIALAGPVTGPVAQYGDMQ  | Negative |
| P21175 | YSMAADTIKIALAGPVTGPV  | Negative |
| P21175 | MAIAGFASYSMAADTIKIAL  | Negative |
| P21175 | GTQRLSRLFAAMAIAGFASY  | Negative |
| P21175 | TQRLSRLFAAMAIAGFASYS  | Negative |
| P21175 | ADTIKIALAGPVTGPVAQYG  | Negative |
| P21175 | AIAGFASYSMAADTIKIALA  | Negative |
| P21175 | DTIKIALAGPVTGPVAQYGD  | Negative |
| P21175 | LSRLFAAMAIAGFASYSMAA  | Negative |
| P21175 | RLFAAMAIAGFASYSMAADT  | Negative |
| P21175 | FASYSMAADTIKIALAGPVT  | Negative |
| P21175 | AMAIAGFASYSMAADTIKIA  | Negative |

|        |                        |          |
|--------|------------------------|----------|
| P21175 | GFASYSMAADTIKIALAGPV   | Negative |
| P21175 | SMAADTIKIALAGPVTGPVA   | Negative |
| P21175 | MKKGQTQRLSRLFAAMAIAGF  | Negative |
| P21175 | KKGTQRLSRLFAAMAIAGFA   | Negative |
| P21175 | TIKIALAGPVTGPVAQYGDM   | Negative |
| P21175 | ASYSMAADTIKIALAGPVTG   | Negative |
| P21175 | AGFASYSMAADTIKIALAGP   | Negative |
| P21175 | MAADTIKIALAGPVTGPVAQ   | Negative |
| P21175 | SRLFAAMAIAGFASYSMAAD   | Negative |
| P21175 | IAGFASYSMAADTIKIALAG   | Negative |
| P21175 | SY SMAADTIKIALAGPVTGP  | Negative |
| P21175 | QRLSRLFAAMAIAGFASYSM   | Negative |
| P21175 | LFAAMAIAGFASYSMAADTI   | Negative |
| P21226 | LRIPILLVLFIVSCCSAEQC   | Negative |
| P21226 | SAEQCGTQAGGALCPGGLCC   | Negative |
| P21226 | PILLVLFIVSCCSAEQCGTQ   | Negative |
| P21226 | GALCPGGLCCSKFGWCGSTS   | Negative |
| P21226 | GGALCPGGLCCSKFGWCGST   | Negative |
| P21226 | ILLVLFIVSCCSAEQCGTQA   | Negative |
| P21226 | CSAEQCGTQAGGALCPGGLC   | Negative |
| P21226 | QAGGALCPGGLCCSKFGWCG   | Negative |
| P21226 | GTQAGGALCPGGLCCSKFGW   | Negative |
| P21226 | LVLVLFIVSCCSAEQCGTQAGG | Negative |
| P21226 | AEQCGTQAGGALCPGGLCCS   | Negative |
| P21226 | SKLRIPILLVLFIVSCCSAE   | Negative |
| P21226 | LFIVSCCSAEQCGTQAGGAL   | Negative |
| P21226 | IVSCCSAEQCGTQAGGALCP   | Negative |
| P21226 | QCGTQAGGALCPGGLCCSKF   | Negative |
| P21226 | CGTQAGGALCPGGLCCSKFG   | Negative |
| P21226 | FIVSCCSAEQCGTQAGGALC   | Negative |
| P21226 | TQAGGALCPGGLCCSKFGWC   | Negative |
| P21226 | LLVLFIVSCCSAEQCGTQAG   | Negative |
| P21226 | RIPILLVLFIVSCCSAEQCG   | Negative |
| P21226 | ALCPGGLCCSKFGWCGSTSE   | Negative |
| P21226 | KLRIPILLVLFIVSCCSAEQ   | Negative |
| P21226 | AGGALCPGGLCCSKFGWCGS   | Negative |
| P21226 | CCSAEQCGTQAGGALCPGGL   | Negative |
| P21226 | MSKLRIPILLVLFIVSCCSA   | Negative |
| P21226 | EQCGTQAGGALCPGGLCCSK   | Negative |
| P21226 | SCCSAEQCGTQAGGALCPGG   | Negative |
| P21226 | VSCCSAEQCGTQAGGALCPG   | Negative |
| P21226 | VLVLFIVSCCSAEQCGTQAGGA | Negative |
| P21326 | ITWYAI VNPQSRAAPTLETI  | Negative |
| P21326 | LTTTKVFFLLTTWITWYAI    | Negative |
| P21326 | QSRAAPTLETIASLDLNNPT   | Negative |
| P21326 | APTLETIASLDLNNPTTYLS   | Negative |

|        |                      |          |
|--------|----------------------|----------|
| P21326 | MLTTTKVFFLLLTTWITWYA | Negative |
| P21326 | LTTWITWYAIVNPQSRAAPT | Negative |
| P21326 | FLLLTTWITWYAIVNPQSRA | Negative |
| P21326 | PQSRAAPTLETIASLDLNNP | Negative |
| P21326 | NPQSRAAPTLETIASLDLNN | Negative |
| P21326 | AAPTLETIASLDLNNPTTYL | Negative |
| P21326 | IVNPQSRAAPTLETIASLDL | Negative |
| P21326 | SRAAPTLETIASLDLNNPTT | Negative |
| P21326 | TTKVFFLLLTTWITWYAIVN | Negative |
| P21326 | WITWYAIVNPQSRAAPTLET | Negative |
| P21326 | TWYAIVNPQSRAAPTLETIA | Negative |
| P21326 | LLTTWITWYAIVNPQSRAAP | Negative |
| P21326 | LLLTTWITWYAIVNPQSRAA | Negative |
| P21326 | KVFFLLLTTWITWYAIVNPQ | Negative |
| P21326 | VFFLLLTTWITWYAIVNPQS | Negative |
| P21326 | YAIVNPQSRAAPTLETIASL | Negative |
| P21326 | VNPQSRAAPTLETIASLDLN | Negative |
| P21326 | WYAIVNPQSRAAPTLETIAS | Negative |
| P21326 | TTWITWYAIVNPQSRAAPTL | Negative |
| P21326 | FLLLTTWITWYAIVNPQSR  | Negative |
| P21326 | PTLETIASLDLNNPTTYLSF | Negative |
| P21326 | TKVFFLLLTTWITWYAIVNP | Negative |
| P21326 | AIVNPQSRAAPTLETIASLD | Negative |
| P21326 | TTTKVFFLLLTTWITWYAIV | Negative |
| P21326 | RAAPTLETIASLDLNNPTTY | Negative |
| P21338 | NALALQAKQYGDFDRYVLAL | Negative |
| P21338 | QAKQYGDFDRYVLALSWQTG | Negative |
| P21338 | VSLLPFSSANALALQAKQYG | Negative |
| P21338 | NAALLAVSLLPFSSANALAL | Negative |
| P21338 | KQYGDFDRYVLALSWQTGFC | Negative |
| P21338 | MKAFWRNAALLAVSLLPFSS | Negative |
| P21338 | SLLPFSSANALALQAKQYGD | Negative |
| P21338 | AVSLLPFSSANALALQAKQY | Negative |
| P21338 | RNAALLAVSLLPFSSANALA | Negative |
| P21338 | FWRNAALLAVSLLPFSSANA | Negative |
| P21338 | ALQAKQYGDFDRYVLALSWQ | Negative |
| P21338 | AKQYGDFDRYVLALSWQTGF | Negative |
| P21338 | ANALALQAKQYGDFDRYVLA | Negative |
| P21338 | FSSANALALQAKQYGDFDRY | Negative |
| P21338 | AFWRNAALLAVSLLPFSSAN | Negative |
| P21338 | LQAKQYGDFDRYVLALSWQT | Negative |
| P21338 | SANALALQAKQYGDFDRYVL | Negative |
| P21338 | AALLAVSLLPFSSANALALQ | Negative |
| P21338 | LLPFSSANALALQAKQYGDF | Negative |
| P21338 | LAVSLLPFSSANALALQAKQ | Negative |
| P21338 | KAFWRNAALLAVSLLPFSSA | Negative |

|        |                      |          |
|--------|----------------------|----------|
| P21338 | QYGDFDRYVLALSWQTGFCQ | Negative |
| P21338 | LALQAKQYGDFDRYVLALSW | Negative |
| P21338 | LLAVSLLPFSSANALALQAK | Negative |
| P21338 | SSANALALQAKQYGDFDRYV | Negative |
| P21338 | WRNAALLAVSLLPFSSANAL | Negative |
| P21338 | PFSSANALALQAKQYGDFDR | Negative |
| P21338 | ALALQAKQYGDFDRYVLALS | Negative |
| P21338 | LPFSSANALALQAKQYGDFD | Negative |
| P21589 | ELTILHTNDVHSRLEQTS   | Negative |
| P21589 | TLLLALGAVLWPAAGAWELT | Negative |
| P21589 | LGAVLWPAAGAWELTILHTN | Negative |
| P21589 | PRAARAPATLLLALGAVLWP | Negative |
| P21589 | RAARAPATLLLALGAVLWPA | Negative |
| P21589 | GAVLWPAAGAWELTILHTND | Negative |
| P21589 | AARAPATLLLALGAVLWPA  | Negative |
| P21589 | GAWELTILHTNDVHSRLEQT | Negative |
| P21589 | ARAPATLLLALGAVLWPAAG | Negative |
| P21589 | PATLLLALGAVLWPAAGAW  | Negative |
| P21589 | RAPATLLLALGAVLWPAAGA | Negative |
| P21589 | AWELTILHTNDVHSRLEQTS | Negative |
| P21589 | LLALGAVLWPAAGAWELTIL | Negative |
| P21589 | VLWPAAGAWELTILHTNDVH | Negative |
| P21589 | AAGAWELTILHTNDVHSRLE | Negative |
| P21589 | WPAAGAWELTILHTNDVHSR | Negative |
| P21589 | AVLWPAAGAWELTILHTNDV | Negative |
| P21589 | TILHTNDVHSRLEQTS     | Negative |
| P21589 | LALGAVLWPAAGAWELTILH | Negative |
| P21589 | ATLLLALGAVLWPAAGAWEL | Negative |
| P21589 | CPRAARAPATLLLALGAVLW | Negative |
| P21589 | PAAGAWELTILHTNDVHSRL | Negative |
| P21589 | LTILHTNDVHSRLEQTS    | Negative |
| P21589 | ALGAVLWPAAGAWELTILHT | Negative |
| P21589 | WELTILHTNDVHSRLEQTS  | Negative |
| P21589 | APATLLLALGAVLWPAAGAW | Negative |
| P21589 | AGAWELTILHTNDVHSRLEQ | Negative |
| P21589 | MCPRAARAPATLLLALGAVL | Negative |
| P21589 | LWPAAGAWELTILHTNDVHS | Negative |
| P21611 | MGKAAAVVLVTLVALLGLAQ | Negative |
| P21611 | QVYSRFPASAGTKNVLCFA  | Negative |
| P21611 | LAQADLTPKVQVYSRFPASA | Negative |
| P21611 | DLTPKVQVYSRFPASAGTKN | Negative |
| P21611 | GKAAAVVLVTLVALLGLAQA | Negative |
| P21611 | VALLGLAQADLTPKVQVYSR | Negative |
| P21611 | KVQVYSRFPASAGTKNVLC  | Negative |
| P21611 | VQVYSRFPASAGTKNVLCF  | Negative |
| P21611 | TPKVQVYSRFPASAGTKNVL | Negative |

|        |                      |          |
|--------|----------------------|----------|
| P21611 | ADLTPKVQVYSRFPASAGTK | Negative |
| P21611 | PKVQVYSRFPASAGTKNVLN | Negative |
| P21611 | LVTLVALLGLAQADLTPKVQ | Negative |
| P21611 | AVVLVTLVALLGLAQADLTP | Negative |
| P21611 | VLVTLVALLGLAQADLTPKV | Negative |
| P21611 | LLGLAQADLTPKVQVYSRFP | Negative |
| P21611 | ALLGLAQADLTPKVQVYSRF | Negative |
| P21611 | AAAVVLVTLVALLGLAQADL | Negative |
| P21611 | TLVALLGLAQADLTPKVQVY | Negative |
| P21611 | YSRFPASAGTKNVLNCFAAG | Negative |
| P21611 | AQADLTPKVQVYSRFPASAG | Negative |
| P21611 | LGLAQADLTPKVQVYSRFP  | Negative |
| P21611 | KAAAVVLVTLVALLGLAQAD | Negative |
| P21611 | GLAQADLTPKVQVYSRFPAS | Negative |
| P21611 | AAVVLVTLVALLGLAQADLT | Negative |
| P21611 | QADLTPKVQVYSRFPASAGT | Negative |
| P21611 | VYSRFPASAGTKNVLNCFAA | Negative |
| P21611 | LVALGLAQADLTPKVQVYS  | Negative |
| P21611 | LTPKVQVYSRFPASAGTKNV | Negative |
| P21611 | VTLVALLGLAQADLTPKVQV | Negative |
| P21614 | LVLLLALAFGHALERGRDYE | Negative |
| P21614 | HALERGRDYEKDKVCNELAM | Negative |
| P21614 | FGHALERGRDYEKDKVCNEL | Negative |
| P21614 | RDYEKDKVCNELAMLGKEDF | Negative |
| P21614 | DYEKDKVCNELAMLGKEDFR | Negative |
| P21614 | CNELAMLGKEDFRSLSLILY | Negative |
| P21614 | RVLVLLLALAFGHALERGRD | Negative |
| P21614 | ALAFGHALERGRDYEKDKVC | Negative |
| P21614 | NELAMLGKEDFRSLSLILYS | Negative |
| P21614 | AFGHALERGRDYEKDKVCNE | Negative |
| P21614 | LERGRDYEKDKVCNELAMLG | Negative |
| P21614 | VCNELAMLGKEDFRSLSLIL | Negative |
| P21614 | EKDKVCNELAMLGKEDFRSL | Negative |
| P21614 | GHALERGRDYEKDKVCNELA | Negative |
| P21614 | YEKDKVCNELAMLGKEDFRS | Negative |
| P21614 | RGRDYEKDKVCNELAMLGKE | Negative |
| P21614 | ERGRDYEKDKVCNELAMLGK | Negative |
| P21614 | LLALAFGHALERGRDYEKDK | Negative |
| P21614 | VLLLALAFGHALERGRDYEK | Negative |
| P21614 | LALAFGHALERGRDYEKDKV | Negative |
| P21614 | LLLALAFGHALERGRDYEKD | Negative |
| P21614 | VLVLLLALAFGHALERGRDY | Negative |
| P21614 | ALERGRDYEKDKVCNELAML | Negative |
| P21614 | KVCNELAMLGKEDFRSLSLI | Negative |
| P21614 | DKVCNELAMLGKEDFRSLSL | Negative |
| P21614 | GRDYEKDKVCNELAMLGKED | Negative |

|        |                      |          |
|--------|----------------------|----------|
| P21614 | MKRVLVLLLALAFGHALERG | Negative |
| P21614 | LAFGHALERGRDYEKDKVCN | Negative |
| P21614 | KDKVCNELAMLGKEDFRSLS | Negative |
| P21697 | SSFFLSVSPAAAANATVKMG | Negative |
| P21697 | PAAAANATVKMGSDSGALVF | Negative |
| P21697 | VSPAAAANATVKMGSDSGAL | Negative |
| P21697 | LLVVSSFFLSVSPAAAANAT | Negative |
| P21697 | LTLAGLLLVVSSFFLSVSP  | Negative |
| P21697 | ANATVKMGSDSGALVFEPST | Negative |
| P21697 | KFLTILAGLLLVVSSFFLSV | Negative |
| P21697 | ILAGLLLVVSSFFLSVSPAA | Negative |
| P21697 | LAGLLLVVSSFFLSVSPAAA | Negative |
| P21697 | GLLLVVSSFFLSVSPAAAAN | Negative |
| P21697 | VSSFFLSVSPAAAANATVKM | Negative |
| P21697 | SFFLSVSPAAAANATVKMG  | Negative |
| P21697 | SKKFLTILAGLLLVVSSFFL | Negative |
| P21697 | LSVSPAAAANATVKMGSDSG | Negative |
| P21697 | SVSPAAAANATVKMGSDSGA | Negative |
| P21697 | MSKKFLTILAGLLLVVSSFF | Negative |
| P21697 | NATVKMGSDSGALVFEPSTV | Negative |
| P21697 | TILAGLLLVVSSFFLSVSPA | Negative |
| P21697 | AAANATVKMGSDSGALVFEP | Negative |
| P21697 | VVSSFFLSVSPAAAANATVK | Negative |
| P21697 | LLLVVSSFFLSVSPAAAANA | Negative |
| P21697 | FLTILAGLLLVVSSFFLSVS | Negative |
| P21697 | SPAAAANATVKMGSDSGALV | Negative |
| P21697 | AANATVKMGSDSGALVFEP  | Negative |
| P21697 | FLSVSPAAAANATVKMGSDS | Negative |
| P21697 | FFLSVSPAAAANATVKMGSD | Negative |
| P21697 | AAAANATVKMGSDSGALVFE | Negative |
| P21697 | KKFLTILAGLLLVVSSFFLS | Negative |
| P21697 | AGLLLVVSSFFLSVSPAAAA | Negative |
| P21741 | KVKKGGPGSECAEWAWGPCT | Negative |
| P21741 | TSAVAKKKDKVKKGGPGSEC | Negative |
| P21741 | LLLTLLALLALTSAVAKKKD | Negative |
| P21741 | LTSAVAKKKDKVKKGGPGSE | Negative |
| P21741 | AKKKDKVKKGGPGSECAEWA | Negative |
| P21741 | GFLLLTLLALLALTSAVAKK | Negative |
| P21741 | LALLALTSAVAKKKDKVKKG | Negative |
| P21741 | KKDKVKKGGPGSECAEWAWG | Negative |
| P21741 | VKKGGPGSECAEWAWGPCTP | Negative |
| P21741 | DKVKKGGPGSECAEWAWGPC | Negative |
| P21741 | RGFLLLTLLALLALTSAVAK | Negative |
| P21741 | LALTSAVAKKKDKVKKGGPG | Negative |
| P21741 | ALLALTSAVAKKKDKVKKGG | Negative |
| P21741 | LLTLLALLALTSAVAKKKDK | Negative |

|        |                       |          |
|--------|-----------------------|----------|
| P21741 | KDKVKKGGPGSECAEWAWGP  | Negative |
| P21741 | ALTSAVAKKKDKVKKGGPGS  | Negative |
| P21741 | VAKKKDKVKKGGPGSECAEW  | Negative |
| P21741 | KGGPGSECAEWAWGPCTPSS  | Negative |
| P21741 | LLALLALTSAVAKKKDKVKK  | Negative |
| P21741 | KKGGPGSECAEWAWGPCTPS  | Negative |
| P21741 | HRGFLLLTLALLALTSAVA   | Negative |
| P21741 | LLALTSAVAKKKDKVKKGGP  | Negative |
| P21741 | KKKDKVKKGGPGSECAEWAW  | Negative |
| P21741 | TLLALLALTSAVAKKKDKVK  | Negative |
| P21741 | LTLLALLALTSAVAKKKDKV  | Negative |
| P21741 | MQHRGFLLLTLALLALTSA   | Negative |
| P21741 | SAVAKKKDKVKKGGPGSECA  | Negative |
| P21741 | AVAKKKDKVKKGGPGSECAE  | Negative |
| P21741 | QHRGFLLLTLALLALTSAV   | Negative |
| P21743 | FQVRVVAGAPQPWHCAPCTA  | Negative |
| P21743 | LTVVSWPFLILLSFQVRVVA  | Negative |
| P21743 | VAGAPQPWHCAPCTAERLEL  | Negative |
| P21743 | FLTVVSWPFLILLSFQVRVV  | Negative |
| P21743 | RVVAGAPQPWHCAPCTAERL  | Negative |
| P21743 | PWHCAPCTAERLELCPPVPA  | Negative |
| P21743 | AGAPQPWHCAPCTAERLELC  | Negative |
| P21743 | ILLSFQVRVVAGAPQPWHCA  | Negative |
| P21743 | VSWPFLILLSFQVRVVAGAP  | Negative |
| P21743 | APQPWHCAPCTAERLELCPP  | Negative |
| P21743 | VRVVAGAPQPWHCAPCTAER  | Negative |
| P21743 | LILLSFQVRVVAGAPQPWHC  | Negative |
| P21743 | GAPQPWHCAPCTAERLELCP  | Negative |
| P21743 | QVRVVAGAPQPWHCAPCTAE  | Negative |
| P21743 | EFLTVVSWPFLILLSFQVRV  | Negative |
| P21743 | PQPWHCAPCTAERLELCPPV  | Negative |
| P21743 | SWPFLILLSFQVRVVAGAPQ  | Negative |
| P21743 | VVAGAPQPWHCAPCTAERLE  | Negative |
| P21743 | QPWHCAPCTAERLELCPPVP  | Negative |
| P21743 | TVVSWPFLILLSFQVRVVAG  | Negative |
| P21743 | SFQVRVVAGAPQPWHCAPCT  | Negative |
| P21743 | VVSWPFLILLSFQVRVVAGA  | Negative |
| P21743 | LSFQVRVVAGAPQPWHCAPC  | Negative |
| P21743 | WHCAPCTAERLELCPPVPAS  | Negative |
| P21743 | MPEFLT VVSWPFLILLSFQV | Negative |
| P21743 | LLSFQVRVVAGAPQPWHCAP  | Negative |
| P21743 | WPFLILLSFQVRVVAGAPQP  | Negative |
| P21743 | FLILLSFQVRVVAGAPQPWH  | Negative |
| P21743 | PEFLT VVSWPFLILLSFQVR | Negative |
| P21744 | PRPSLGDEAIHCPPCSEKL   | Negative |
| P21744 | AAGPRPSLGDEAIHCPPCSE  | Negative |

|        |                       |          |
|--------|-----------------------|----------|
| P21744 | GPRPSLGDEAIHCPPCSEEK  | Negative |
| P21744 | LPFGLVAALLLAAGPRPSLG  | Negative |
| P21744 | LGDEAIHCPPCSEEKLARCR  | Negative |
| P21744 | SLGDEAIHCPPCSEEKLARC  | Negative |
| P21744 | PSLGDEAIHCPPCSEEKLAR  | Negative |
| P21744 | DEAIHCPPCSEEKLARCRPP  | Negative |
| P21744 | AGPRPSLGDEAIHCPPCSEE  | Negative |
| P21744 | EAIHCPPCSEEKLARCRPPV  | Negative |
| P21744 | AALLLAAGPRPSLGDEAIHC  | Negative |
| P21744 | LAAGPRPSLGDEAIHCPPCS  | Negative |
| P21744 | IHCPPCSEEKLARCRPPVGC  | Negative |
| P21744 | MLPFGLVAALLLAAGPRPSL  | Negative |
| P21744 | CSEEKLARCRPPVGCEELVR  | Negative |
| P21744 | AIHCPPCSEEKLARCRPPVG  | Negative |
| P21744 | CPPCSEEKLARCRPPVGCEE  | Negative |
| P21744 | FGLVAALLLAAGPRPSLGDE  | Negative |
| P21744 | LVAALLLAAGPRPSLGDEAI  | Negative |
| P21744 | LLAAGPRPSLGDEAIHCPPC  | Negative |
| P21744 | PFGLVAALLLAAGPRPSLGD  | Negative |
| P21744 | HCPPCSEEKLARCRPPVGCE  | Negative |
| P21744 | RPSLGDEAIHCPPCSEEKLA  | Negative |
| P21744 | GLVAALLLAAGPRPSLGDEA  | Negative |
| P21744 | LLLAAGPRPSLGDEAIHCPP  | Negative |
| P21744 | ALLLAAGPRPSLGDEAIHCP  | Negative |
| P21744 | GDEAIHCPPCSEEKLARCRP  | Negative |
| P21744 | PCSEEKLARCRPPVGCEELV  | Negative |
| P21744 | PPCSEEKLARCRPPVGCEEL  | Negative |
| P21760 | TLALSLALALLCLLHTEAAA  | Negative |
| P21760 | EVAGKWIYIVALASNTDFFLR | Negative |
| P21760 | CLLHTEAAATVPDRSEVAGK  | Negative |
| P21760 | PDRSEVAGKWIYIVALASNTD | Negative |
| P21760 | TEAAATVPDRSEVAGKWIYI  | Negative |
| P21760 | ALALLCLLHTEAAATVPDRS  | Negative |
| P21760 | AAATVPDRSEVAGKWIYIVAL | Negative |
| P21760 | RTLALSLALALLCLLHTEAA  | Negative |
| P21760 | LLHTEAAATVPDRSEVAGKW  | Negative |
| P21760 | VPDRSEVAGKWIYIVALASNT | Negative |
| P21760 | LCLLHTEAAATVPDRSEVAG  | Negative |
| P21760 | LLCLLHTEAAATVPDRSEVA  | Negative |
| P21760 | ALLCLLHTEAAATVPDRSEV  | Negative |
| P21760 | LALLCLLHTEAAATVPDRSE  | Negative |
| P21760 | MRTLALSLALALLCLLHTEA  | Negative |
| P21760 | SEVAGKWIYIVALASNTDFFL | Negative |
| P21760 | TVPDRSEVAGKWIYIVALASN | Negative |
| P21760 | VAGKWIYIVALASNTDFFLRE | Negative |
| P21760 | ATVPDRSEVAGKWIYIVALAS | Negative |



|        |                      |          |
|--------|----------------------|----------|
| P21760 | EAAATVPDRSEVAGKWIYA  | Negative |
| P21760 | ALSLALALLCLLHTEAAATV | Negative |
| P21760 | LALSLALALLCLLHTEAAAT | Negative |
| P21760 | RSEVAGKWIYALASNTDF   | Negative |
| P21760 | LHTEAAATVPDRSEVAGKWI | Negative |
| P21760 | AATVPDRSEVAGKWIYALA  | Negative |
| P21760 | SLALALLCLLHTEAAATVPD | Negative |
| P21760 | HTEAAATVPDRSEVAGKWI  | Negative |
| P21760 | LALALLCLLHTEAAATVPDR | Negative |
| P21760 | DRSEVAGKWIYALASNTDF  | Negative |
| P21781 | LYRSCFHIICLVGTISLACN | Negative |
| P21781 | WILPTLLYRSCFHIICLVGT | Negative |
| P21781 | ILPTLLYRSCFHIICLVGTI | Negative |
| P21781 | ISLACNDMTPEQMATNVNCS | Negative |
| P21781 | IICLVGTISLACNDMTPEQM | Negative |
| P21781 | PTLLYRSCFHIICLVGTISL | Negative |
| P21781 | LVGTISLACNDMTPEQMATN | Negative |
| P21781 | HKWILTWILPTLLYRSCFHI | Negative |
| P21781 | TISLACNDMTPEQMATNVNC | Negative |
| P21781 | LPTLLYRSCFHIICLVGTIS | Negative |
| P21781 | KWILTWILPTLLYRSCFHII | Negative |
| P21781 | RSCFHIICLVGTISLACNDM | Negative |
| P21781 | LLYRSCFHIICLVGTISLAC | Negative |
| P21781 | WILTWILPTLLYRSCFHIC  | Negative |
| P21781 | FHIICLVGTISLACNDMTPE | Negative |
| P21781 | YRSCFHIICLVGTISLACND | Negative |
| P21781 | VGTSILACNDMTPEQMATNV | Negative |
| P21781 | HIICLVGTISLACNDMTPEQ | Negative |
| P21781 | TLLYRSCFHIICLVGTISLA | Negative |
| P21781 | TWILPTLLYRSCFHIICLVG | Negative |
| P21781 | LTWILPTLLYRSCFHIICLV | Negative |
| P21781 | CFHIICLVGTISLACNDMTP | Negative |
| P21781 | ICLVGTISLACNDMTPEQMA | Negative |
| P21781 | CLVGTISLACNDMTPEQMAT | Negative |
| P21781 | MHKWILTWILPTLLYRSCFH | Negative |
| P21781 | ILTWILPTLLYRSCFHIICL | Negative |
| P21781 | SLACNDMTPEQMATNVNCSS | Negative |
| P21781 | GTISLACNDMTPEQMATNVN | Negative |
| P21781 | LACNDMTPEQMATNVNCSSP | Negative |
| P21782 | YLQQRKFAAAFLAFIFILA  | Negative |
| P21782 | MQTPQYLQQRKFAAAFLAF  | Negative |
| P21782 | AVDTAEAGKKEKPEKKVKKS | Negative |
| P21782 | QTPQYLQQRKFAAAFLAFI  | Negative |
| P21782 | IFILAAVDTAEAGKKEKPEK | Negative |
| P21782 | QRRKFAAAFLAFIFILAAVD | Negative |
| P21782 | AFIFILAAVDTAEAGKKEKP | Negative |

|        |                       |          |
|--------|-----------------------|----------|
| P21782 | PQYLQRRKF AAAFLAFIFI  | Negative |
| P21782 | RRKF AAAFLAFIFILAAVDT | Negative |
| P21782 | TAEAGKKEKPEKKVKKSDCG  | Negative |
| P21782 | LQRRKF AAAFLAFIFILAA  | Negative |
| P21782 | TPQYLQRRKF AAAFLAFIF  | Negative |
| P21782 | AAFLAFIFILAAVDTAEAGK  | Negative |
| P21782 | FAAAFLAFIFILAAVDTAEA  | Negative |
| P21782 | DTAEAGKKEKPEKKVKKSDC  | Negative |
| P21782 | AAVDTAEAGKKEKPEKKVKK  | Negative |
| P21782 | AEAGKKEKPEKKVKKSDCGE  | Negative |
| P21782 | ILAAVDTAEAGKKEKPEKKV  | Negative |
| P21782 | FIFILAAVDTAEAGKKEKPE  | Negative |
| P21782 | LAAVDTAEAGKKEKPEKKVK  | Negative |
| P21782 | QRRKF AAAFLAFIFILAAV  | Negative |
| P21782 | VDTAEGKKEKPEKKVKKSD   | Negative |
| P21782 | RKF AAAFLAFIFILAAVDTA | Negative |
| P21782 | FILAAVDTAEAGKKEKPEKK  | Negative |
| P21782 | FLAFIFILAAVDTAEAGKKE  | Negative |
| P21782 | AFLAFIFILAAVDTAEAGKK  | Negative |
| P21782 | KFAAAFLAFIFILAAVDTAE  | Negative |
| P21782 | AAAFILAFIFILAAVDTAEAG | Negative |
| P21782 | QYLQRRKF AAAFLAFIFIL  | Negative |
| P21814 | LVFILCGLFNSIFCEKQQHS  | Negative |
| P21814 | FCEKQQHSQQHANLVLLKKI  | Negative |
| P21814 | IFCEKQQHSQQHANLVLLKK  | Negative |
| P21814 | LSLVFILCGLFNSIFCEKQQ  | Negative |
| P21814 | MSHRMQLALSLVFILCGLF   | Negative |
| P21814 | ILCGLFNSIFCEKQQHSQQH  | Negative |
| P21814 | QHSQQHANLVLLKKISAFSQ  | Negative |
| P21814 | MLALSLVFILCGLFNSIFC   | Negative |
| P21814 | QQHSQQHANLVLLKKISAFS  | Negative |
| P21814 | HSQQHANLVLLKKISAFSQK  | Negative |
| P21814 | VFILCGLFNSIFCEKQQHSQ  | Negative |
| P21814 | SHRRMQLALSLVFILCGLFN  | Negative |
| P21814 | EKQQHSQQHANLVLLKKISA  | Negative |
| P21814 | LALSLVFILCGLFNSIFCEK  | Negative |
| P21814 | LCGLFNSIFCEKQQHSQQHA  | Negative |
| P21814 | FNSIFCEKQQHSQQHANLVL  | Negative |
| P21814 | GLFNSIFCEKQQHSQQHANL  | Negative |
| P21814 | KQQHSQQHANLVLLKKISAF  | Negative |
| P21814 | NSIFCEKQQHSQQHANLVLL  | Negative |
| P21814 | RRMQLALSLVFILCGLFNSI  | Negative |
| P21814 | FILCGLFNSIFCEKQQHSQQ  | Negative |
| P21814 | CEKQQHSQQHANLVLLKKIS  | Negative |
| P21814 | RMQLALSLVFILCGLFNSIF  | Negative |
| P21814 | ALSLVFILCGLFNSIFCEKQ  | Negative |

|        |                       |          |
|--------|-----------------------|----------|
| P21814 | CGLFNSIFCEKQQHSQQHAN  | Negative |
| P21814 | QLALSLVFILCGLFNSIFCE  | Negative |
| P21814 | SIFCEKQQHSQQHANLVLLK  | Negative |
| P21814 | HRRMQLALSLVFILCGLFNS  | Negative |
| P21814 | LFNSIFCEKQQHSQQHANLV  | Negative |
| P21828 | APSVTINQYSDNEIPRDIDD  | Negative |
| P21828 | INQYSDNEIPRDIDDGKASS  | Negative |
| P21828 | YSDNEIPRDIDDGKASSVIS  | Negative |
| P21828 | PSVTINQYSDNEIPRDIDDG  | Negative |
| P21828 | NEIPRDIDDGKASSVISRAW  | Negative |
| P21828 | PIFLVLLVATSAYAAPSVTI  | Negative |
| P21828 | FLVLLVATSAYAAPSVTINQ  | Negative |
| P21828 | SDNEIPRDIDDGKASSVISR  | Negative |
| P21828 | YAAPSVTINQYSDNEIPRDI  | Negative |
| P21828 | SVTINQYSDNEIPRDIDDGK  | Negative |
| P21828 | ATSAYAAPSVTINQYSDNEI  | Negative |
| P21828 | DNEIPRDIDDGKASSVISRA  | Negative |
| P21828 | IPRDIDDGKASSVISRAWDY  | Negative |
| P21828 | EIPRDIDDGKASSVISRAWD  | Negative |
| P21828 | AYAAPSVTINQYSDNEIPRD  | Negative |
| P21828 | QYSDNEIPRDIDDGKASSVI  | Negative |
| P21828 | MKPIFLVLLVATSAYAAPSV  | Negative |
| P21828 | VLLVATSAYAAPSVTINQYS  | Negative |
| P21828 | SAYAAPSVTINQYSDNEIPR  | Negative |
| P21828 | VTINQYSDNEIPRDIDDGKA  | Negative |
| P21828 | IFLVLLVATSAYAAPSVTIN  | Negative |
| P21828 | LLVATSAYAAPSVTINQYSD  | Negative |
| P21828 | AAPSVTINQYSDNEIPRDID  | Negative |
| P21828 | TSAYAAPSVTINQYSDNEIP  | Negative |
| P21828 | LVATSAYAAPSVTINQYSDN  | Negative |
| P21828 | NQYSDNEIPRDIDDGKASSV  | Negative |
| P21828 | TINQYSDNEIPRDIDDGKAS  | Negative |
| P21828 | VATSAYAAPSVTINQYSDNE  | Negative |
| P21828 | LVLLVATSAYAAPSVTINQY  | Negative |
| P21837 | TLGDNEVLLSDGAIRGTVTD  | Negative |
| P21837 | IIILLIILLSFDIISAACKKF | Negative |
| P21837 | SFDIISAACKKFGRKGIRTLG | Negative |
| P21837 | LLIILLSFDIISAACKKFGRK | Negative |
| P21837 | IRTLGDNEVLLSDGAIRGTV  | Negative |
| P21837 | RKGIRTLGDNEVLLSDGAIR  | Negative |
| P21837 | GIRTLGDNEVLLSDGAIRGT  | Negative |
| P21837 | SAACKKFGRKGIRTLGDNEVL | Negative |
| P21837 | KGIRTLGDNEVLLSDGAIRG  | Negative |
| P21837 | IISAACKKFGRKGIRTLGDNE | Negative |
| P21837 | AAKKFGRKGIRTLGDNEVLL  | Negative |
| P21837 | LIILLSFDIISAACKKFGRKG | Negative |

|        |                       |          |
|--------|-----------------------|----------|
| P21837 | ILLIILLSFDIISAACKFGR  | Negative |
| P21837 | KKFGRKGIRTLGDNEVLLSD  | Negative |
| P21837 | RTLGDNEVLLSDGAIRGTVT  | Negative |
| P21837 | KFGRKGIRTLGDNEVLLSDG  | Negative |
| P21837 | KIILLIILLSFDIISAACK   | Negative |
| P21837 | GRKGIRTLGDNEVLLSDGAI  | Negative |
| P21837 | NKIILLIILLSFDIISAACK  | Negative |
| P21837 | LSFDIISAACKFGRKGIRTL  | Negative |
| P21837 | IILLSFDIISAACKFGRKGI  | Negative |
| P21837 | LLSFDIISAACKFGRKGIRT  | Negative |
| P21837 | MNKIILLIILLSFDIISAA   | Negative |
| P21837 | DIISAACKFGRKGIRTLGDN  | Negative |
| P21837 | FGRKGIRTLGDNEVLLSDGA  | Negative |
| P21837 | ISAAKKFGRKGIRTLGDNEV  | Negative |
| P21837 | FDIISAACKFGRKGIRTLGD  | Negative |
| P21837 | AKKFGRKGIRTLGDNEVLLS  | Negative |
| P21837 | ILLSFDIISAACKFGRKGIR  | Negative |
| P21919 | AAVVVLQVCWAAVLWPCPPT  | Negative |
| P21919 | LAVVVLQVCWAAVLWPCPP   | Negative |
| P21919 | AAVLWPCPPTHSSPVDCREE  | Negative |
| P21919 | VDCREEQAGSSQCPTISQEK  | Negative |
| P21919 | SSPVDCREEQAGSSQCPTIS  | Negative |
| P21919 | WAAVLWPCPPTHSSPVDCRE  | Negative |
| P21919 | PVDCREEQAGSSQCPTISQE  | Negative |
| P21919 | VLWPCPPTHSSPVDCREEQA  | Negative |
| P21919 | VVLQVCWAAVLWPCPPTHSS  | Negative |
| P21919 | LQVCWAAVLWPCPPTHSSPV  | Negative |
| P21919 | VLQVCWAAVLWPCPPTHSSP  | Negative |
| P21919 | LWPCPPTHSSPVDCREEQAG  | Negative |
| P21919 | SPVDCREEQAGSSQCPTISQ  | Negative |
| P21919 | HTLAAVVVLQVCWAAVLWPC  | Negative |
| P21919 | PTHSSPVDCREEQAGSSQCP  | Negative |
| P21919 | CPPTHSSPVDCREEQAGSSQ  | Negative |
| P21919 | VVVLQVCWAAVLWPCPPTHSS | Negative |
| P21919 | DCREEQAGSSQCPTISQEKL  | Negative |
| P21919 | MHTLAAVVVLQVCWAAVLWP  | Negative |
| P21919 | PPTHSSPVDCREEQAGSSQC  | Negative |
| P21919 | THSSPVDCREEQAGSSQCPT  | Negative |
| P21919 | PCPPTHSSPVDCREEQAGSS  | Negative |
| P21919 | WPCPPTHSSPVDCREEQAGS  | Negative |
| P21919 | HSSPVDCREEQAGSSQCPTI  | Negative |
| P21919 | AVLWPCPPTHSSPVDCREEQ  | Negative |
| P21919 | AVVVLQVCWAAVLWPCPPTH  | Negative |
| P21919 | CWAAVLWPCPPTHSSPVDCR  | Negative |
| P21919 | QVCWAAVLWPCPPTHSSPVD  | Negative |
| P21919 | TLAAVVVLQVCWAAVLWPCP  | Negative |

|        |                       |          |
|--------|-----------------------|----------|
| P21956 | CDSSLCLNGGTCLTGQDNDI  | Negative |
| P21956 | RVLAALCGMLLCASGLFAAS  | Negative |
| P21956 | VSRVLAALCGMLLCASGLFA  | Negative |
| P21956 | LLCASGLFAASGDFCDSSLCL | Negative |
| P21956 | AASGDFCDSSLCLNGGTCLT  | Negative |
| P21956 | ALCGMLLCASGLFAASGDFC  | Negative |
| P21956 | FAASGDFCDSSLCLNGGTCL  | Negative |
| P21956 | LFAASGDFCDSSLCLNGGTCL | Negative |
| P21956 | QVSRVLAALCGMLLCASGLF  | Negative |
| P21956 | LCASGLFAASGDFCDSSLCL  | Negative |
| P21956 | VLAALCGMLLCASGLFAASG  | Negative |
| P21956 | DFCDSSLCLNGGTCLTGQDN  | Negative |
| P21956 | FCDSSLCLNGGTCLTGQDND  | Negative |
| P21956 | DSSLCLNGGTCLTGQDNDIY  | Negative |
| P21956 | LAALCGMLLCASGLFAASGD  | Negative |
| P21956 | GMLLCASGLFAASGDFCDSS  | Negative |
| P21956 | CASGLFAASGDFCDSSLCLN  | Negative |
| P21956 | MQVSRVLAALCGMLLCASGL  | Negative |
| P21956 | SGDFCDSSLCLNGGTCLTGQ  | Negative |
| P21956 | CGMLLCASGLFAASGDFCDS  | Negative |
| P21956 | SSLCLNGGTCLTGQDNDIYC  | Negative |
| P21956 | GLFAASGDFCDSSLCLNGGT  | Negative |
| P21956 | ASGDFCDSSLCLNGGTCLTG  | Negative |
| P21956 | SRVLAALCGMLLCASGLFAA  | Negative |
| P21956 | ASGLFAASGDFCDSSLCLNG  | Negative |
| P21956 | MLLCASGLFAASGDFCDSSL  | Negative |
| P21956 | SGLFAASGDFCDSSLCLNGG  | Negative |
| P21956 | LCGMLLCASGLFAASGDFCD  | Negative |
| P21956 | GDFCDSSLCLNGGTCLTGQD  | Negative |
| P21978 | LCTSSAPVARAAGTSDFTGA  | Negative |
| P21978 | AAPLAAVVALLLCTSSAPVA  | Negative |
| P21978 | ALLLCTSSAPVARAAGTSDF  | Negative |
| P21978 | RLVLAAPLAAVVALLLCTSS  | Negative |
| P21978 | LAHVALLLCTSSAPVARAA   | Negative |
| P21978 | CTSSAPVARAAGTSDFTGAQ  | Negative |
| P21978 | RRLVLAAPLAAVVALLLCTS  | Negative |
| P21978 | QCVRRVLAAAPLAHVALLL   | Negative |
| P21978 | AAHVALLLCTSSAPVARAAG  | Negative |
| P21978 | SAPVARAAGTSDFTGAQQKN  | Negative |
| P21978 | MAQCVRRLVLAAPLAHVALL  | Negative |
| P21978 | LAAPLAHVALLLCTSSAPV   | Negative |
| P21978 | SSAPVARAAGTSDFTGAQQK  | Negative |
| P21978 | VRRLVLAAPLAHVALLLCT   | Negative |
| P21978 | PLAAHVALLLCTSSAPVARA  | Negative |
| P21978 | ARAAGTSDFTGAQQKNTLTV  | Negative |
| P21978 | AVVALLLCTSSAPVARAAGT  | Negative |

|        |                      |          |
|--------|----------------------|----------|
| P21978 | VVALLCTSSAPVARAAGTS  | Negative |
| P21978 | CVRRLVLAAPLAADVALLLC | Negative |
| P21978 | AQCVRRLVLAAPLAADVALL | Negative |
| P21978 | PVARAAGTSDFTGAQQKNTL | Negative |
| P21978 | LVLAAPLAADVALLCTSSA  | Negative |
| P21978 | APVARAAGTSDFTGAQQKNT | Negative |
| P21978 | APLAADVALLCTSSAPVAR  | Negative |
| P21978 | VARAAGTSDFTGAQQKNTLT | Negative |
| P21978 | VLAAPLAADVALLCTSSAP  | Negative |
| P21978 | LLCTSSAPVARAAGTSDFTG | Negative |
| P21978 | TSSAPVARAAGTSDFTGAQQ | Negative |
| P21978 | LLLCTSSAPVARAAGTSDFT | Negative |
| P21982 | IDFSKLVGEGNTGLHAPTTI | Negative |
| P21982 | TLIDFSKLVGEGNTGLHAPT | Negative |
| P21982 | GAFAEQATLIDFSKLVGEGN | Negative |
| P21982 | MKRFFAILGAALFVGNSGAF | Negative |
| P21982 | SGAFAEQATLIDFSKLVGEG | Negative |
| P21982 | LIDFSKLVGEGNTGLHAPTT | Negative |
| P21982 | VGNSGAFAEQATLIDFSKLV | Negative |
| P21982 | FVGNSGAFAEQATLIDFSKL | Negative |
| P21982 | AFAEQATLIDFSKLVGEGNT | Negative |
| P21982 | KRFFAILGAALFVGNSGAFA | Negative |
| P21982 | AILGAALFVGNSGAFAEQAT | Negative |
| P21982 | FSKLVGEGNTGLHAPTTIDY | Negative |
| P21982 | LFVGNSGAFAEQATLIDFSK | Negative |
| P21982 | RFFAILGAALFVGNSGAFAE | Negative |
| P21982 | SKLVGEGNTGLHAPTTIDYS | Negative |
| P21982 | FAEQATLIDFSKLVGEGNTG | Negative |
| P21982 | AALFVGNSGAFAEQATLIDF | Negative |
| P21982 | NSGAFAEQATLIDFSKLVGE | Negative |
| P21982 | QATLIDFSKLVGEGNTGLHA | Negative |
| P21982 | DFSKLVGEGNTGLHAPTTID | Negative |
| P21982 | EQATLIDFSKLVGEGNTGLH | Negative |
| P21982 | FAILGAALFVGNSGAFAEQA | Negative |
| P21982 | GNSGAFAEQATLIDFSKLVG | Negative |
| P21982 | ATLIDFSKLVGEGNTGLHAP | Negative |
| P21982 | LGAALFVGNSGAFAEQATLI | Negative |
| P21982 | ALFVGNSGAFAEQATLIDFS | Negative |
| P21982 | AEQATLIDFSKLVGEGNTGL | Negative |
| P21982 | FFAILGAALFVGNSGAFAEQ | Negative |
| P21982 | GAALFVGNSGAFAEQATLID | Negative |
| P22063 | GWSFAQGTPATFGPIFEEQP | Negative |
| P22063 | SSPGWSFAQGTPATFGPIFE | Negative |
| P22063 | AQGTPATFGPIFEEQPIGLL | Negative |
| P22063 | HARKKASLLLLVLATVALVS | Negative |
| P22063 | MGTHARKKASLLLLVLATVA | Negative |

|        |                      |          |
|--------|----------------------|----------|
| P22063 | RKKASLLLLVLATVALVSSP | Negative |
| P22063 | LVSSPGWSFAQGTPATFGPI | Negative |
| P22063 | LLVLATVALVSSPGWSFAQG | Negative |
| P22063 | LVLATVALVSSPGWSFAQGT | Negative |
| P22063 | SPGWSFAQGTPATFGPIFEE | Negative |
| P22063 | LLLLVLATVALVSSPGWSFA | Negative |
| P22063 | THARKKASLLLLVLATVALV | Negative |
| P22063 | ASLLLLVLATVALVSSPGWS | Negative |
| P22063 | VLATVALVSSPGWSFAQGTP | Negative |
| P22063 | SLLLLVLATVALVSSPGWSF | Negative |
| P22063 | PGWSFAQGTPATFGPIFEEQ | Negative |
| P22063 | WSFAQGTPATFGPIFEEQPI | Negative |
| P22063 | VSSPGWSFAQGTPATFGPIF | Negative |
| P22063 | SFAQGTPATFGPIFEEQPIG | Negative |
| P22063 | FAQGTPATFGPIFEEQPIGL | Negative |
| P22063 | ALVSSPGWSFAQGTPATFGP | Negative |
| P22063 | TVALVSSPGWSFAQGTPATF | Negative |
| P22063 | GTHARKKASLLLLVLATVAL | Negative |
| P22063 | LLVLATVALVSSPGWSFAQ  | Negative |
| P22063 | ATVALVSSPGWSFAQGTPAT | Negative |
| P22063 | ARKKASLLLLVLATVALVSS | Negative |
| P22063 | VALVSSPGWSFAQGTPATFG | Negative |
| P22063 | KKASLLLLVLATVALVSSPG | Negative |
| P22063 | KASLLLLVLATVALVSSPGW | Negative |
| P22088 | CAMSIAPFAGTTAVMTLATT | Negative |
| P22088 | MRSRVVAGAVACAMSIAPFA | Negative |
| P22088 | VVAGAVACAMSIAPFAGTTA | Negative |
| P22088 | RSRVVAGAVACAMSIAPFAG | Negative |
| P22088 | VAGAVACAMSIAPFAGTTAV | Negative |
| P22088 | GTTAVMTLATTHAAMAATAP | Negative |
| P22088 | SRVVAGAVACAMSIAPFAGT | Negative |
| P22088 | AMSIAPFAGTTAVMTLATTH | Negative |
| P22088 | AGAVACAMSIAPFAGTTAVM | Negative |
| P22088 | FAGTTAVMTLATTHAAMAAT | Negative |
| P22088 | RTMRSRVVAGAVACAMSIAP | Negative |
| P22088 | PFAGTTAVMTLATTHAAMAA | Negative |
| P22088 | VMTLATTHAAMAATAPAGY  | Negative |
| P22088 | MARTMRSRVVAGAVACAMSI | Negative |
| P22088 | RVVAGAVACAMSIAPFAGTT | Negative |
| P22088 | ACAMSIAPFAGTTAVMTLAT | Negative |
| P22088 | TMRSRVVAGAVACAMSIAPF | Negative |
| P22088 | ARTMRSRVVAGAVACAMSI  | Negative |
| P22088 | MSIAPFAGTTAVMTLATTHA | Negative |
| P22088 | SIAPFAGTTAVMTLATTHAA | Negative |
| P22088 | AVACAMSIAPFAGTTAVMTL | Negative |
| P22088 | TAVMTLATTHAAMAATAPAA | Negative |

|        |                      |          |
|--------|----------------------|----------|
| P22088 | AGTTAVMTLATTHAAMAATA | Negative |
| P22088 | APFAGTTAVMTLATTHAAMA | Negative |
| P22088 | GAVACAMSIAPFAGTTAVMT | Negative |
| P22088 | VACAMSIAPFAGTTAVMTLA | Negative |
| P22088 | TTAVMTLATTHAAMAATAPA | Negative |
| P22088 | AVMTLATTHAAMAATAPAAG | Negative |
| P22088 | IAPFAGTTAVMTLATTHAAM | Negative |
| P22146 | DDVPAIEVVGNKFFYSNNGS | Negative |
| P22146 | TADDVPAIEVVGNKFFYSNN | Negative |
| P22146 | AFFAGVATADDVPAIEVVGN | Negative |
| P22146 | FAGVATADDVPAIEVVGNKF | Negative |
| P22146 | MLFKSLSKLATAAAFFAGVA | Negative |
| P22146 | KSLSKLATAAAFFAGVATAD | Negative |
| P22146 | TAAAFFAGVATADDVPAIEV | Negative |
| P22146 | ADDVPAIEVVGNKFFYSNNG | Negative |
| P22146 | AAFFAGVATADDVPAIEVVG | Negative |
| P22146 | ATADDVPAIEVVGNKFFYSN | Negative |
| P22146 | IEVVGNKFFYSNNGSQFYIR | Negative |
| P22146 | GVATADDVPAIEVVGNKFFY | Negative |
| P22146 | VATADDVPAIEVVGNKFFYS | Negative |
| P22146 | SKLATAAAFFAGVATADDVP | Negative |
| P22146 | DVPAIEVVGNKFFYSNNGSQ | Negative |
| P22146 | LSKLATAAAFFAGVATADDV | Negative |
| P22146 | SLSKLATAAAFFAGVATADD | Negative |
| P22146 | VPAIEVVGNKFFYSNNGSQF | Negative |
| P22146 | EVVGNKFFYSNNGSQFYIRG | Negative |
| P22146 | LFKSLSKLATAAAFFAGVAT | Negative |
| P22146 | AIEVVGNKFFYSNNGSQFYI | Negative |
| P22146 | AAAFFAGVATADDVPAIEVV | Negative |
| P22146 | ATAAAFFAGVATADDVPAIE | Negative |
| P22146 | LATAAAFFAGVATADDVPAI | Negative |
| P22146 | AGVATADDVPAIEVVGNKFF | Negative |
| P22146 | PAIEVVGNKFFYSNNGSQFY | Negative |
| P22146 | FFAGVATADDVPAIEVVGNK | Negative |
| P22146 | FKSLSKLATAAAFFAGVATA | Negative |
| P22146 | VVGNKFFYSNNGSQFYIRGV | Negative |
| P22266 | VALGSCLALAGPAGSAGAAP | Negative |
| P22266 | ALAGPAGSAGAAPADPVPTV | Negative |
| P22266 | LTAAVALGSCLALAGPAGS  | Negative |
| P22266 | SAMRKTTNSPVVRRLTAAAV | Negative |
| P22266 | TNSPVVRRLTAAVALGSCL  | Negative |
| P22266 | SSAMRKTTNSPVVRRLTAAA | Negative |
| P22266 | CLALAGPAGSAGAAPADPVP | Negative |
| P22266 | RKTTNSPVVRRLTAAVALG  | Negative |
| P22266 | AAVALGSCLALAGPAGSAG  | Negative |
| P22266 | LGSCALAGPAGSAGAAPAD  | Negative |



|        |                       |          |
|--------|-----------------------|----------|
| P22266 | LALAGPAGSAGAAPADPVPT  | Negative |
| P22266 | RLTAAAVALGSCSLALAGPAG | Negative |
| P22266 | PVVRRLTAAAVALGSCSLALA | Negative |
| P22266 | VRRLTAAAVALGSCSLALAGP | Negative |
| P22266 | AMRKTTNSPVVRRLTAAAVA  | Negative |
| P22266 | TTNSPVVRRLTAAAVALGSC  | Negative |
| P22266 | VVRRLTAAAVALGSCSLALAG | Negative |
| P22266 | MRKTTNSPVVRRLTAAAVAL  | Negative |
| P22266 | NSPVVRRLTAAAVALGSCSLA | Negative |
| P22266 | TAAAVALGSCSLALAGPAGSA | Negative |
| P22266 | KTTNSPVVRRLTAAAVALGS  | Negative |
| P22266 | MSSAMRKTTNSPVVRRLTAA  | Negative |
| P22266 | SPVVRRLTAAAVALGSCSLAL | Negative |
| P22266 | SCLALAGPAGSAGAAPADPV  | Negative |
| P22266 | ALGSCSLALAGPAGSAGAAPA | Negative |
| P22266 | RRLTAAAVALGSCSLALAGPA | Negative |
| P22266 | AVALGSCSLALAGPAGSAGAA | Negative |
| P22266 | LAGPAGSAGAAPADPVPTVF  | Negative |
| P22266 | AAVALGSCSLALAGPAGSAGA | Negative |
| P22297 | AAYMKDCEQMLEVPTKSKVA  | Negative |
| P22297 | CVPAAYMKDCEQMLEVPTKS  | Negative |
| P22297 | KLCVPAAYMKDCEQMLEVPT  | Negative |
| P22297 | IALTCAAANAAKSSYKLCVP  | Negative |
| P22297 | LTCAAANAAKSSYKLCVPAA  | Negative |
| P22297 | LKLLTLIALTCAAANAAKSS  | Negative |
| P22297 | ANAAKSSYKLCVPAAYMKDC  | Negative |
| P22297 | LLTLIALTCAAANAAKSSYK  | Negative |
| P22297 | SSYKLCVPAAYMKDCEQMLE  | Negative |
| P22297 | AKSSYKLCVPAAYMKDCEQM  | Negative |
| P22297 | TLIALTCAAANAAKSSYKLC  | Negative |
| P22297 | ALTCAAANAAKSSYKLCVPA  | Negative |
| P22297 | AAANAAKSSYKLCVPAAYMK  | Negative |
| P22297 | SYKLCVPAAYMKDCEQMLEV  | Negative |
| P22297 | AYMKDCEQMLEVPTKSKVAL  | Negative |
| P22297 | KSSYKLCVPAAYMKDCEQML  | Negative |
| P22297 | LIALTCAAANAAKSSYKLCV  | Negative |
| P22297 | AANAAKSSYKLCVPAAYMKD  | Negative |
| P22297 | TCAAANAAKSSYKLCVPAAY  | Negative |
| P22297 | VPAAYMKDCEQMLEVPTKSK  | Negative |
| P22297 | LTLIALTCAAANAAKSSYKL  | Negative |
| P22297 | MALKLLTLIALTCAAANAAK  | Negative |
| P22297 | NAAKSSYKLCVPAAYMKDCE  | Negative |
| P22297 | CAAANAAKSSYKLCVPAAYM  | Negative |
| P22297 | AAKSSYKLCVPAAYMKDCEQ  | Negative |
| P22297 | YKLCVPAAYMKDCEQMLEVP  | Negative |
| P22297 | ALKLLTLIALTCAAANAAKS  | Negative |

|        |                       |          |
|--------|-----------------------|----------|
| P22297 | PAAAYMKDCEQMLEVPTKSKV | Negative |
| P22297 | LCVPAAAYMKDCEQMLEVPTK | Negative |
| P22301 | SSALLCCLVLLTGVRASPGQ  | Negative |
| P22301 | SENSCTHFPGNLPNMLRDLR  | Negative |
| P22301 | NSCTHFPGNLPNMLRDLRDA  | Negative |
| P22301 | TQSENSCTHFPGNLPNMLRD  | Negative |
| P22301 | VRASPGQGTQSENSCTHFPG  | Negative |
| P22301 | GQGTQSENSCTHFPGNLPNM  | Negative |
| P22301 | LTGVRASPGQGTQSENSCTH  | Negative |
| P22301 | LCCLVLLTGVRASPGQGTQS  | Negative |
| P22301 | GVRASPGQGTQSENSCTHFP  | Negative |
| P22301 | QGTQSENSCTHFPGNLPNML  | Negative |
| P22301 | TGVRASPGQGTQSENSCTHF  | Negative |
| P22301 | PGQGTQSENSCTHFPGNLPN  | Negative |
| P22301 | CTHFPGNLPNMLRDLRDAFS  | Negative |
| P22301 | QSENSCTHFPGNLPNMLRDL  | Negative |
| P22301 | ENSCTHFPGNLPNMLRDLRD  | Negative |
| P22301 | LVLLTGVRASPGQGTQSENS  | Negative |
| P22301 | SCTHFPGNLPNMLRDLRDAF  | Negative |
| P22301 | ASPGQGTQSENSCTHFPGNL  | Negative |
| P22301 | LLTGVRASPGQGTQSENSCT  | Negative |
| P22301 | SPGQGTQSENSCTHFPGNLP  | Negative |
| P22301 | ALLCCLVLLTGVRASPGQGT  | Negative |
| P22301 | HSSALLCCLVLLTGVRASPG  | Negative |
| P22301 | MHSSALLCCLVLLTGVRASP  | Negative |
| P22301 | LLCCLVLLTGVRASPGQGTQ  | Negative |
| P22301 | VLLTGVRASPGQGTQSENSC  | Negative |
| P22301 | CCLVLLTGVRASPGQGTQSE  | Negative |
| P22301 | RASPGQGTQSENSCTHFPGN  | Negative |
| P22301 | GTQSENSCTHFPGNLPNMLR  | Negative |
| P22301 | CLVLLTGVRASPGQGTQSEN  | Negative |
| P22323 | VFGIMAEDIQVAQVPSQHMP  | Negative |
| P22323 | SAISRGLLLAGLCYLVFGI   | Negative |
| P22323 | VAQVPSQHMPSHKVPRSLAH  | Negative |
| P22323 | LCYLVFGIMAEDIQVAQVPS  | Negative |
| P22323 | GIMAEDIQVAQVPSQHMPSH  | Negative |
| P22323 | ISRGLLLAGLCYLVFGIMA   | Negative |
| P22323 | EDIQVAQVPSQHMPSHKVPR  | Negative |
| P22323 | LLLAGLCYLVFGIMAEDIQ   | Negative |
| P22323 | YLVFGIMAEDIQVAQVPSQH  | Negative |
| P22323 | GLLLAGLCYLVFGIMAEDI   | Negative |
| P22323 | MPSAISRGLLLAGLCYLVF   | Negative |
| P22323 | GLCYLVFGIMAEDIQVAQVP  | Negative |
| P22323 | AISRGLLLAGLCYLVFGIM   | Negative |
| P22323 | FGIMAEDIQVAQVPSQHMP   | Negative |
| P22323 | IQVAQVPSQHMPSHKVPRSL  | Negative |

|        |                      |          |
|--------|----------------------|----------|
| P22323 | CYLVFGIMAEDIQVAQVPSQ | Negative |
| P22323 | LVFGIMAEDIQVAQVPSQHM | Negative |
| P22323 | LAGLCYLVFGIMAEDIQVAQ | Negative |
| P22323 | AEDIQVAQVPSQHMPSHKVP | Negative |
| P22323 | LLAGLCYLVFGIMAEDIQVA | Negative |
| P22323 | SRGLLLLAGLCYLVFGIMAE | Negative |
| P22323 | MAEDIQVAQVPSQHMPSHKV | Negative |
| P22323 | AQVPSQHMPSHKVPRSLAHF | Negative |
| P22323 | RGLLLLAGLCYLVFGIMAED | Negative |
| P22323 | AGLCYLVFGIMAEDIQVAQV | Negative |
| P22323 | IMAEDIQVAQVPSQHMPSHK | Negative |
| P22323 | PSAISRGLLLLAGLCYLVFG | Negative |
| P22323 | DIQVAQVPSQHMPSHKVPRS | Negative |
| P22323 | QVAQVPSQHMPSHKVPRSLA | Negative |
| P22325 | GIMAEDAQVAQGSPQQIPRS | Negative |
| P22325 | LLLLAGLCCLVFGIMAEDAQ | Negative |
| P22325 | LAGLCCLVFGIMAEDAQVAQ | Negative |
| P22325 | EDAQVAQGSPQQIPRSLAHF | Negative |
| P22325 | VFGIMAEDAQVAQGSPQQIP | Negative |
| P22325 | LCCLVFGIMAEDAQVAQGPS | Negative |
| P22325 | GLLLAGLCCLVFGIMAEDA  | Negative |
| P22325 | PSAIPRGLLLLAGLCCLVFG | Negative |
| P22325 | AIPRGLLLLAGLCCLVFGIM | Negative |
| P22325 | IMAEDAQVAQGSPQQIPRSL | Negative |
| P22325 | AEDAQVAQGSPQQIPRSLAH | Negative |
| P22325 | IPRGLLLLAGLCCLVFGIMA | Negative |
| P22325 | AQVAQGSPQQIPRSLAHFAH | Negative |
| P22325 | RGLLLLAGLCCLVFGIMAED | Negative |
| P22325 | FGIMAEDAQVAQGSPQQIPR | Negative |
| P22325 | AGLCCLVFGIMAEDAQVAQG | Negative |
| P22325 | CCLVFGIMAEDAQVAQGSPQ | Negative |
| P22325 | SAIPRGLLLLAGLCCLVFGI | Negative |
| P22325 | MPSAIPRGLLLLAGLCCLVF | Negative |
| P22325 | VAQGSPQQIPRSLAHFAHSM | Negative |
| P22325 | QVAQGSPQQIPRSLAHFAHS | Negative |
| P22325 | PRGLLLLAGLCCLVFGIMAE | Negative |
| P22325 | MAEDAQVAQGSPQQIPRSLA | Negative |
| P22325 | LLAGLCCLVFGIMAEDAQVA | Negative |
| P22325 | DAQVAQGSPQQIPRSLAHFA | Negative |
| P22325 | GLCCLVFGIMAEDAQVAQGP | Negative |
| P22325 | CLVFGIMAEDAQVAQGSPQQ | Negative |
| P22325 | AQGSPQQIPRSLAHFAHSMY | Negative |
| P22325 | LVFGIMAEDAQVAQGSPQQI | Negative |
| P22327 | VAGGLADPVRNNVPQKPADP | Negative |
| P22327 | GLADPVRNNVPQKPADPVFA | Negative |
| P22327 | LVAGGLADPVRNNVPQKPAD | Negative |

|        |                      |          |
|--------|----------------------|----------|
| P22327 | RNNVPQKPADPVFAKRQMDL | Negative |
| P22327 | VLCALALLVAGGLADPVRNN | Negative |
| P22327 | RLVLCALALLVAGGLADPVR | Negative |
| P22327 | GGLADPVRNNVPQKPADPVF | Negative |
| P22327 | ADPVRNNVPQKPADPVFAKR | Negative |
| P22327 | ALLVAGGLADPVRNNVPQKP | Negative |
| P22327 | VPQKPADPVFAKRQMDLMTL | Negative |
| P22327 | ALALLVAGGLADPVRNNVPQ | Negative |
| P22327 | LADPVRNNVPQKPADPVFAK | Negative |
| P22327 | MARLVLCALALLVAGGLADP | Negative |
| P22327 | ADPVFAKRQMDLMTLFFHVL | Negative |
| P22327 | LLVAGGLADPVRNNVPQKPA | Negative |
| P22327 | NNVPQKPADPVFAKRQMDLM | Negative |
| P22327 | VRNNVPQKPADPVFAKRQMD | Negative |
| P22327 | PQKPADPVFAKRQMDLMTLF | Negative |
| P22327 | PADPVFAKRQMDLMTLFFHV | Negative |
| P22327 | DPVRNNVPQKPADPVFAKRQ | Negative |
| P22327 | AGGLADPVRNNVPQKPADPV | Negative |
| P22327 | NVPQKPADPVFAKRQMDLMT | Negative |
| P22327 | LALLVAGGLADPVRNNVPQK | Negative |
| P22327 | LCALALLVAGGLADPVRNNV | Negative |
| P22327 | PVRNNVPQKPADPVFAKRQM | Negative |
| P22327 | KPADPVFAKRQMDLMTLFFH | Negative |
| P22327 | ARLVLCALALLVAGGLADPV | Negative |
| P22327 | CALALLVAGGLADPVRNNVP | Negative |
| P22327 | QKPADPVFAKRQMDLMTLFF | Negative |
| P22340 | TLAMLIALLTSAASAHAQTD | Negative |
| P22340 | TSAASAHAQTDISTIEARLN | Negative |
| P22340 | IEARLNALEKRLQEAENRAQ | Negative |
| P22340 | LAMLIALLTSAASAHAQTDI | Negative |
| P22340 | LLTSAASAHAQTDISTIEAR | Negative |
| P22340 | IALLTSAASAHAQTDISTIE | Negative |
| P22340 | ALLTSAASAHAQTDISTIEA | Negative |
| P22340 | QTDISTIEARLNALEKRLQE | Negative |
| P22340 | EARLNALEKRLQEAENRAQT | Negative |
| P22340 | YRKSTLAMLIALLTSAASAH | Negative |
| P22340 | LIALLTSAASAHAQTDISTI | Negative |
| P22340 | TIEARLNALEKRLQEAENRA | Negative |
| P22340 | MLIALLTSAASAHAQTDIST | Negative |
| P22340 | STLAMLIALLTSAASAHAQT | Negative |
| P22340 | AHAQTDISTIEARLNALEKR | Negative |
| P22340 | TDISTIEARLNALEKRLQEA | Negative |
| P22340 | HAQTDISTIEARLNALEKRL | Negative |
| P22340 | AQTDISTIEARLNALEKRLQ | Negative |
| P22340 | DISTIEARLNALEKRLQEAE | Negative |
| P22340 | ASAHAQTDISTIEARLNALE | Negative |

|        |                       |          |
|--------|-----------------------|----------|
| P22340 | AASAHQAQTDISTIEARLNAL | Negative |
| P22340 | LTSAASAHQAQTDISTIEARL | Negative |
| P22340 | RKSTLAMLIALLTSAASAHQA | Negative |
| P22340 | SAASAHQAQTDISTIEARLNA | Negative |
| P22340 | ISTIEARLNALQKRLQEAEN  | Negative |
| P22340 | KSTLAMLIALLTSAASAHQA  | Negative |
| P22340 | MYRKSTLAMLIALLTSAASA  | Negative |
| P22340 | STIEARLNALQKRLQEAENR  | Negative |
| P22340 | SAHAQTDISTIEARLNALQK  | Negative |
| P22362 | CLLAGMWPEVDVSKSMQVP   | Negative |
| P22362 | ITTALVCLLAGMWPEVDVDS  | Negative |
| P22362 | LLLAGMWPEVDVSKSMQVPF  | Negative |
| P22362 | LVCLLAGMWPEVDVSKSMQ   | Negative |
| P22362 | GMWPEVDVSKSMQVPFSRCC  | Negative |
| P22362 | MWPEVDVSKSMQVPFSRCCF  | Negative |
| P22362 | PFSRCCFSFAEQEIPLRAIL  | Negative |
| P22362 | VPFSRCCFSFAEQEIPLRAI  | Negative |
| P22362 | IITTALVCLLAGMWPEVDV   | Negative |
| P22362 | TTALVCLLAGMWPEVDVSK   | Negative |
| P22362 | VDSKSMQVPFSRCCFSFAEQ  | Negative |
| P22362 | DSKSMQVPFSRCCFSFAEQE  | Negative |
| P22362 | DVDVSKSMQVPFSRCCFSFAE | Negative |
| P22362 | SKSMQVPFSRCCFSFAEQEI  | Negative |
| P22362 | TALVCLLAGMWPEVDVSKS   | Negative |
| P22362 | QVPFSRCCFSFAEQEIPLRA  | Negative |
| P22362 | AGMWPEVDVSKSMQVPFSRC  | Negative |
| P22362 | MQVPFSRCCFSFAEQEIPLR  | Negative |
| P22362 | LLAGMWPEVDVSKSMQVPFS  | Negative |
| P22362 | QIITTALVCLLAGMWPEVDV  | Negative |
| P22362 | PEVDVSKSMQVPFSRCCFSF  | Negative |
| P22362 | KSMQVPFSRCCFSFAEQEIP  | Negative |
| P22362 | WPEDVDVSKSMQVPFSRCCFS | Negative |
| P22362 | ALVCLLAGMWPEVDVSKSM   | Negative |
| P22362 | LAGMWPEVDVSKSMQVPFSR  | Negative |
| P22362 | SMQVPFSRCCFSFAEQEIPL  | Negative |
| P22362 | MQIITTALVCLLAGMWPEVD  | Negative |
| P22362 | FSRCCFSFAEQEIPLRAILC  | Negative |
| P22362 | EDVDVSKSMQVPFSRCCFSFA | Negative |
| P22364 | CLAACVLAAFGATGALADKA  | Negative |
| P22364 | GATGALADKATIPSESPFAA  | Negative |
| P22364 | ISATKIRSCLAACVLAAFGA  | Negative |
| P22364 | LAAFGATGALADKATIPSES  | Negative |
| P22364 | ATIPSESPFAAAEVADGAIV  | Negative |
| P22364 | AFGATGALADKATIPSESPF  | Negative |
| P22364 | KATIPSESPFAAAEVADGAI  | Negative |
| P22364 | AAFGATGALADKATIPSESP  | Negative |

|        |                      |          |
|--------|----------------------|----------|
| P22364 | DKATIPSESPFAAAEVADGA | Negative |
| P22364 | SATKIRSCLAACVLAAFGAT | Negative |
| P22364 | TKIRSCLAACVLAAFGATGA | Negative |
| P22364 | VLAAFGATGALADKATIPSE | Negative |
| P22364 | LADKATIPSESPFAAAEVAD | Negative |
| P22364 | TGALADKATIPSESPFAAAE | Negative |
| P22364 | RSCLAACVLAAFGATGALAD | Negative |
| P22364 | TIPSESPFAAAEVADGAIVV | Negative |
| P22364 | ADKATIPSESPFAAAEVADG | Negative |
| P22364 | ATGALADKATIPSESPFAAA | Negative |
| P22364 | GALADKATIPSESPFAAAEV | Negative |
| P22364 | ATKIRSCLAACVLAAFGATG | Negative |
| P22364 | IRSCLAACVLAAFGATGALA | Negative |
| P22364 | ALADKATIPSESPFAAAEVA | Negative |
| P22364 | SCLAACVLAAFGATGALADK | Negative |
| P22364 | ACVLAAFGATGALADKATIP | Negative |
| P22364 | KIRSCLAACVLAAFGATGAL | Negative |
| P22364 | LAACVLAAFGATGALADKAT | Negative |
| P22364 | CVLAAFGATGALADKATIPS | Negative |
| P22364 | FGATGALADKATIPSESPFA | Negative |
| P22364 | MISATKIRSCLAACVLAAFG | Negative |
| P22365 | SAKTLRPAIAAIALFAIGAT | Negative |
| P22365 | GATGAWAQDKITVTSEKPVA | Negative |
| P22365 | QDKITVTSEKPVAAADVPAD | Negative |
| P22365 | DKITVTSEKPVAAADVPADA | Negative |
| P22365 | AWAQDKITVTSEKPVAAADV | Negative |
| P22365 | KTLRPAIAAIALFAIGATGA | Negative |
| P22365 | AQDKITVTSEKPVAAADVPA | Negative |
| P22365 | AIALFAIGATGAWAQDKITV | Negative |
| P22365 | ISAKTLRPAIAAIALFAIGA | Negative |
| P22365 | AKTLRPAIAAIALFAIGATG | Negative |
| P22365 | MISAKTLRPAIAAIALFAIG | Negative |
| P22365 | KITVTSEKPVAAADVPADAV | Negative |
| P22365 | AIGATGAWAQDKITVTSEKP | Negative |
| P22365 | IGATGAWAQDKITVTSEKPV | Negative |
| P22365 | WAQDKITVTSEKPVAAADV  | Negative |
| P22365 | ALFAIGATGAWAQDKITVTS | Negative |
| P22365 | TGAWAQDKITVTSEKPVAAA | Negative |
| P22365 | GAWAQDKITVTSEKPVAAAD | Negative |
| P22365 | IAAIALFAIGATGAWAQDKI | Negative |
| P22365 | IALFAIGATGAWAQDKITVT | Negative |
| P22365 | ATGAWAQDKITVTSEKPVAA | Negative |
| P22365 | TLRPAIAAIALFAIGATGAW | Negative |
| P22365 | LRPAIAAIALFAIGATGAWA | Negative |
| P22365 | PAIAAIALFAIGATGAWAQD | Negative |
| P22365 | LFAIGATGAWAQDKITVTSE | Negative |

|        |                        |          |
|--------|------------------------|----------|
| P22365 | RPAIAAIALFAIGATGAWAQ   | Negative |
| P22365 | AIAAIALFAIGATGAWAQDK   | Negative |
| P22365 | ITVTSEKPVAAADVPADEVV   | Negative |
| P22365 | FAIGATGAWAQDKITVTSEK   | Negative |
| P22388 | APETAVLGAELSPRAEKEVQ   | Negative |
| P22388 | PVIFSLLFVAFQGAPETA VL  | Negative |
| P22388 | FQGAPETA VLGAELSPRAEK  | Negative |
| P22388 | GAPETA VLGAELSPRAEKEV  | Negative |
| P22388 | AELSPRAEKEVQSPPPSTSW   | Negative |
| P22388 | PRAEKEVQSPPPSTSWRPRR   | Negative |
| P22388 | QGAPETA VLGAELSPRAEKE  | Negative |
| P22388 | GAELSPRAEKEVQSPPPSTS   | Negative |
| P22388 | FPVIFSLLFVAFQGAPETA V  | Negative |
| P22388 | MDYFPVIFSLLFVAFQGAPE   | Negative |
| P22388 | VLGAELSPRAEKEVQSPPPS   | Negative |
| P22388 | TAVLGAELSPRAEKEVQSPP   | Negative |
| P22388 | FSLLFVAFQGAPETA VLGAE  | Negative |
| P22388 | AVLGAELSPRAEKEVQSPPP   | Negative |
| P22388 | ETA VLGAELSPRAEKEVQSP  | Negative |
| P22388 | VIFSLLFVAFQGAPETA VLG  | Negative |
| P22388 | FVAFQGAPETA VLGAELSPR  | Negative |
| P22388 | VAFQGAPETA VLGAELSPRA  | Negative |
| P22388 | LLFVAFQGAPETA VLGAE LS | Negative |
| P22388 | SLLFVAFQGAPETA VLGAE L | Negative |
| P22388 | SPRAEKEVQSPPPSTSWRPR   | Negative |
| P22388 | YFPVIFSLLFVAFQGAPETA   | Negative |
| P22388 | AFQGAPETA VLGAELSPRAE  | Negative |
| P22388 | IFSLLFVAFQGAPETA VLG A | Negative |
| P22388 | LSPRAEKEVQSPPPSTSWRP   | Negative |
| P22388 | PETA VLGAELSPRAEKEVQS  | Negative |
| P22388 | ELSPRAEKEVQSPPPSTSWR   | Negative |
| P22388 | LGAE LSPRAEKEVQSPPPST  | Negative |
| P22388 | DYFPVIFSLLFVAFQGAPET   | Negative |
| P22390 | SPLLARTQGEPTQVQQKLA A  | Negative |
| P22390 | ARTQGEPTQVQQKLA ALEKQ  | Negative |
| P22390 | PLLARTQGEPTQVQQKLA AL  | Negative |
| P22390 | VLAFFTASSPLLARTQGEPT   | Negative |
| P22390 | KRGRQTVLIAAVLAFFTASS   | Negative |
| P22390 | SSPLLARTQGEPTQVQQKLA   | Negative |
| P22390 | RQTVLIAAVLAFFTASSPLL   | Negative |
| P22390 | VLIAAVLAFFTASSPLLART   | Negative |
| P22390 | LIAAVLAFFTASSPLLARTQ   | Negative |
| P22390 | FKKRGRQTVLIAAVLAFFTA   | Negative |
| P22390 | LLARTQGEPTQVQQKLA ALE  | Negative |
| P22390 | ASSPLLARTQGEPTQVQQKL   | Negative |
| P22390 | RGRQTVLIAAVLAFFTASSP   | Negative |

|        |                       |          |
|--------|-----------------------|----------|
| P22390 | AFFTASSPLLARTQGEPTQV  | Negative |
| P22390 | KKRGRQTVLIAAVLAFFTAS  | Negative |
| P22390 | TQGEPTQVQQKLAALEKQSG  | Negative |
| P22390 | FFTASSPLLARTQGEPTQVQ  | Negative |
| P22390 | GRQTVLIAAVLAFFTASSPL  | Negative |
| P22390 | IAAVLAFFTASSPLLARTQG  | Negative |
| P22390 | QGEPTQVQQKLAALEKQSGG  | Negative |
| P22390 | QTVLIAAVLAFFTASSPLLA  | Negative |
| P22390 | TASSPLLARTQGEPTQVQQK  | Negative |
| P22390 | MFKKRGRQTVLIAAVLAFFT  | Negative |
| P22390 | FTASSPLLARTQGEPTQVQQ  | Negative |
| P22390 | LARTQGEPTQVQQKLAALEK  | Negative |
| P22390 | TVLIAAVLAFFTASSPLLAR  | Negative |
| P22390 | LAAFFTASSPLLARTQGEPTQ | Negative |
| P22390 | AVLAFFTASSPLLARTQGEP  | Negative |
| P22390 | RTQGEPTQVQQKLAALEKQS  | Negative |
| P22394 | NLAGVLAQAPRPSLNGNEVI  | Negative |
| P22394 | AQAPRPSLNGNEVISGVLEG  | Negative |
| P22394 | NGNEVISGVLEGKVDTFKGI  | Negative |
| P22394 | RPSLNGNEVISGVLEGKVDT  | Negative |
| P22394 | APRPSLNGNEVISGVLEGKV  | Negative |
| P22394 | VSKSLFLAAAVNLAGVLAQA  | Negative |
| P22394 | SLNGNEVISGVLEGKVDTFK  | Negative |
| P22394 | AAVNLAGVLAQAPRPSLNGN  | Negative |
| P22394 | KSLFLAAAVNLAGVLAQAPR  | Negative |
| P22394 | VLAQAPRPSLNGNEVISGVL  | Negative |
| P22394 | NEVISGVLEGKVDTFKGIPF  | Negative |
| P22394 | AGVLAQAPRPSLNGNEVISG  | Negative |
| P22394 | QAPRPSLNGNEVISGVLEGK  | Negative |
| P22394 | EVISGVLEGKVDTFKGIPFA  | Negative |
| P22394 | AAAVNLAGVLAQAPRPSLNG  | Negative |
| P22394 | GVLAQAPRPSLNGNEVISGV  | Negative |
| P22394 | LFLAAAVNLAGVLAQAPRPS  | Negative |
| P22394 | PSLNGNEVISGVLEGKVDTF  | Negative |
| P22394 | GNEVISGVLEGKVDTFKGIP  | Negative |
| P22394 | VNLAGVLAQAPRPSLNGNEV  | Negative |
| P22394 | LAQAPRPSLNGNEVISGVLE  | Negative |
| P22394 | LAGVLAQAPRPSLNGNEVIS  | Negative |
| P22394 | MVSKSLFLAAAVNLAGVLAQ  | Negative |
| P22394 | LNGNEVISGVLEGKVDTFKG  | Negative |
| P22394 | AVNLAGVLAQAPRPSLNGNE  | Negative |
| P22394 | LAAAVNLAGVLAQAPRPSLN  | Negative |
| P22394 | SKSLFLAAAVNLAGVLAQAP  | Negative |
| P22394 | FLAAAVNLAGVLAQAPRPSL  | Negative |
| P22394 | PRPSLNGNEVISGVLEGKVD  | Negative |
| P22412 | MQDTPVIDGHNDLPWQLNL   | Negative |



|        |                      |          |
|--------|----------------------|----------|
| P22412 | TPVIDGHNDLPWQLLNLFNN | Negative |
| P22412 | LWPLVAVCAADQFRDLAVRI | Negative |
| P22412 | AADQFRDLAVRIMQDTPVID | Negative |
| P22412 | DLAVRIMQDTPVIDGHNDLP | Negative |
| P22412 | TSWWLWPLVAVCAADQFRDL | Negative |
| P22412 | RDLAVRIMQDTPVIDGHNDL | Negative |
| P22412 | DTPVIDGHNDLPWQLLNLFN | Negative |
| P22412 | QFRDLAVRIMQDTPVIDGHN | Negative |
| P22412 | RIMQDTPVIDGHNDLPWQLL | Negative |
| P22412 | MWTSWWLWPLVAVCAADQFR | Negative |
| P22412 | LAVRIMQDTPVIDGHNDLPW | Negative |
| P22412 | AVCAADQFRDLAVRIMQDTP | Negative |
| P22412 | PLVAVCAADQFRDLAVRIMQ | Negative |
| P22412 | AVRIMQDTPVIDGHNDLPWQ | Negative |
| P22412 | QDTPVIDGHNDLPWQLLNLF | Negative |
| P22412 | SWWLWPLVAVCAADQFRDLA | Negative |
| P22412 | IMQDTPVIDGHNDLPWQLLN | Negative |
| P22412 | WWLWPLVAVCAADQFRDLAV | Negative |
| P22412 | VCAADQFRDLAVRIMQDTPV | Negative |
| P22412 | ADQFRDLAVRIMQDTPVIDG | Negative |
| P22412 | VRIMQDTPVIDGHNDLPWQL | Negative |
| P22412 | WPLVAVCAADQFRDLAVRIM | Negative |
| P22412 | CAADQFRDLAVRIMQDTPVI | Negative |
| P22412 | WLWPLVAVCAADQFRDLAVR | Negative |
| P22412 | DQFRDLAVRIMQDTPVIDGH | Negative |
| P22412 | VAVCAADQFRDLAVRIMQDT | Negative |
| P22412 | LVAVCAADQFRDLAVRIMQD | Negative |
| P22412 | FRDLAVRIMQDTPVIDGHND | Negative |
| P22458 | VVLADQESCKDRCTEGFNAN | Negative |
| P22458 | VLADQESCKDRCTEGFNANR | Negative |
| P22458 | DQESCKDRCTEGFNANRKCQ | Negative |
| P22458 | IFTLALLLWVVLADQESCKD | Negative |
| P22458 | DRCTEGFNANRKCQCDELCS | Negative |
| P22458 | LLWVVLADQESCKDRCTEGF | Negative |
| P22458 | CKDRCTEGFNANRKCQCDEL | Negative |
| P22458 | LALLLWVVLADQESCKDRCT | Negative |
| P22458 | ALLLWVVLADQESCKDRCTE | Negative |
| P22458 | PLRPIFTLALLLWVVLADQE | Negative |
| P22458 | FTLALLLWVVLADQESCKDR | Negative |
| P22458 | QESCKDRCTEGFNANRKCQC | Negative |
| P22458 | ADQESCKDRCTEGFNANRKC | Negative |
| P22458 | TEGFNANRKCQCDELCSYYQ | Negative |
| P22458 | PIFTLALLLWVVLADQESCK | Negative |
| P22458 | SCKDRCTEGFNANRKCQCDE | Negative |
| P22458 | LLLWVVLADQESCKDRCTEG | Negative |
| P22458 | EGFNANRKCQCDELCSYYQS | Negative |

|        |                      |          |
|--------|----------------------|----------|
| P22458 | LADQESCKDRCTEGFNANRK | Negative |
| P22458 | KDRCTEGFNANRKCQCDEL  | Negative |
| P22458 | TLALLLWVVLADQESCKDRC | Negative |
| P22458 | WVVLADQESCKDRCTEGFNA | Negative |
| P22458 | RCTEGFNANRKCQCDELCSY | Negative |
| P22458 | LRPIFTLALLLWVVLADQES | Negative |
| P22458 | MAPLRPIFTLALLLWVVLAD | Negative |
| P22458 | CTEGFNANRKCQCDELCSYY | Negative |
| P22458 | ESCKDRCTEGFNANRKCQCD | Negative |
| P22458 | LWVVLADQESCKDRCTEGFN | Negative |
| P22458 | APLRPIFTLALLLWVVLADQ | Negative |
| P22541 | LAIVIVGGVFGISFVKGRVT | Negative |
| P22541 | MVSKKQKFLTVILVIVLAIV | Negative |
| P22541 | GGVFGISFVKGRVTFPWQLQ | Negative |
| P22541 | VILVIVLAIVIVGGVFGISF | Negative |
| P22541 | GVFGISFVKGRVTFPWQLQN | Negative |
| P22541 | LTVILVIVLAIVIVGGVFGI | Negative |
| P22541 | AIVIVGGVFGISFVKGRVTF | Negative |
| P22541 | IVIVGGVFGISFVKGRVTFP | Negative |
| P22541 | SKKQKFLTVILVIVLAIVIV | Negative |
| P22541 | QKFLTVILVIVLAIVIVGGV | Negative |
| P22541 | ILVIVLAIVIVGGVFGISFV | Negative |
| P22541 | IVGGVFGISFVKGRVTFPWQ | Negative |
| P22541 | FLTVILVIVLAIVIVGGVFG | Negative |
| P22541 | IVLAIVIVGGVFGISFVKGR | Negative |
| P22541 | ISFVKGRVTFPWQLQNSEAK | Negative |
| P22541 | KQKFLTVILVIVLAIVIVGG | Negative |
| P22541 | VFGISFVKGRVTFPWQLQNS | Negative |
| P22541 | VIVLAIVIVGGVFGISFVKG | Negative |
| P22541 | SFVKGRVTFPWQLQNSEAKT | Negative |
| P22541 | GISFVKGRVTFPWQLQNSEA | Negative |
| P22541 | FGISFVKGRVTFPWQLQNSE | Negative |
| P22541 | VLAIVIVGGVFGISFVKGRV | Negative |
| P22541 | TVILVIVLAIVIVGGVFGIS | Negative |
| P22541 | FVKGRVTFPWQLQNSEAKTE | Negative |
| P22541 | KKQKFLTVILVIVLAIVIVG | Negative |
| P22541 | VGGVFGISFVKGRVTFPWQL | Negative |
| P22541 | LVIVLAIVIVGGVFGISFVK | Negative |
| P22541 | VSKKQKFLTVILVIVLAIVI | Negative |
| P22541 | KFLTVILVIVLAIVIVGGVF | Negative |
| P22629 | VSLTTVSITASASADPSKDS | Negative |
| P22629 | SASADPSKDSKAQVSAEAG  | Negative |
| P22629 | TASASADPSKDSKAQVSAE  | Negative |
| P22629 | VSITASASADPSKDSKAQVS | Negative |
| P22629 | VAAIAVSLTTVSITASASAD | Negative |
| P22629 | RKIVVAAIAVSLTTVSITAS | Negative |

|        |                        |          |
|--------|------------------------|----------|
| P22629 | TTVSITASASADPSKDSKAQ   | Negative |
| P22629 | KIVVAAIAVSLTTVSITASASA | Negative |
| P22629 | IVVAAIAVSLTTVSITASAS   | Negative |
| P22629 | ASASADPSKDSKAQVSAAEA   | Negative |
| P22629 | ASADPSKDSKAQVSAAEAGI   | Negative |
| P22629 | SKAQVSAAEAGITGTWYNQL   | Negative |
| P22629 | DSKAQVSAAEAGITGTWYNQ   | Negative |
| P22629 | ITASASADPSKDSKAQVSAA   | Negative |
| P22629 | ADPSKDSKAQVSAAEAGITG   | Negative |
| P22629 | TVSITASASADPSKDSKAQV   | Negative |
| P22629 | SLTTVSITASASADPSKDSK   | Negative |
| P22629 | AAIAVSLTTVSITASASADP   | Negative |
| P22629 | VVAAIAVSLTTVSITASASA   | Negative |
| P22629 | LTTVSITASASADPSKDSKA   | Negative |
| P22629 | SADPSKDSKAQVSAAEAGIT   | Negative |
| P22629 | SKDSKAQVSAAEAGITGTWY   | Negative |
| P22629 | IAVSLTTVSITASASADPS    | Negative |
| P22629 | MRKIVVAAIAVSLTTVSITA   | Negative |
| P22629 | PSKDSKAQVSAAEAGITGTW   | Negative |
| P22629 | SITASASADPSKDSKAQVSA   | Negative |
| P22629 | IAVSLTTVSITASASADPSK   | Negative |
| P22629 | KDSKAQVSAAEAGITGTWYN   | Negative |
| P22629 | DPSKDSKAQVSAAEAGITGT   | Negative |
| P22641 | MVEKLSRRVAGRTSRRGAIG   | Negative |
| P22641 | MLGNFRFDDMVEKLSRRVAG   | Negative |
| P22641 | GRLGTVLAGAALVPLLVPDR   | Negative |
| P22641 | RVAGRTSRRGAIGRLGTVLA   | Negative |
| P22641 | AIGRLGTVLAGAALVLLPV    | Negative |
| P22641 | TSRRGAIGRLGTVLAGAALV   | Negative |
| P22641 | VAGRTSRRGAIGRLGTVLAG   | Negative |
| P22641 | RGAIGRLGTVLAGAALVPLL   | Negative |
| P22641 | NFRFDDMVEKLSRRVAGRTS   | Negative |
| P22641 | AGRTSRRGAIGRLGTVLAGA   | Negative |
| P22641 | SRRVAGRTSRRGAIGRLGTV   | Negative |
| P22641 | LGNFRFDDMVEKLSRRVAGR   | Negative |
| P22641 | IGRLGTVLAGAALVPLLVPD   | Negative |
| P22641 | VEKLSRRVAGRTSRRGAIGR   | Negative |
| P22641 | FRFDDMVEKLSRRVAGRTSR   | Negative |
| P22641 | DMVEKLSRRVAGRTSRRGAI   | Negative |
| P22641 | RTSRRGAIGRLGTVLAGAAL   | Negative |
| P22641 | DDMVEKLSRRVAGRTSRRGA   | Negative |
| P22641 | SRRGAIGRLGTVLAGAALVP   | Negative |
| P22641 | RRVAGRTSRRGAIGRLGTVL   | Negative |
| P22641 | RFDDMVEKLSRRVAGRTSRR   | Negative |
| P22641 | FDDMVEKLSRRVAGRTSRRG   | Negative |
| P22641 | GRTSRRGAIGRLGTVLAGAA   | Negative |

|        |                      |          |
|--------|----------------------|----------|
| P22641 | KLSRRVAGRTSRRGAIGRLG | Negative |
| P22641 | RRGAIGRLGTVLAGAALVPL | Negative |
| P22641 | RLGTVLAGAALVPLLVDRR  | Negative |
| P22641 | GAIGRLGTVLAGAALVPLLP | Negative |
| P22641 | EKLSRRVAGRTSRRGAIGRL | Negative |
| P22641 | GNFRFDDMVEKLSRRVAGRT | Negative |
| P22641 | LSRRVAGRTSRRGAIGRLGT | Negative |
| P22692 | MLPLCLVAALLLAAGPGPSL | Negative |
| P22692 | DEAIHCPPCSEEKLARCRPP | Negative |
| P22692 | PLCLVAALLLAAGPGPSLGD | Negative |
| P22692 | LCLVAALLLAAGPGPSLGDE | Negative |
| P22692 | HCPPCSEEKLARCRPPVGCE | Negative |
| P22692 | SLGDEAIHCPPCSEEKLARC | Negative |
| P22692 | GPGPSLGDEAIHCPPCSEEK | Negative |
| P22692 | LAAGPGPSLGDEAIHCPPCS | Negative |
| P22692 | AALLLAAGPGPSLGDEAIHC | Negative |
| P22692 | LPLCLVAALLLAAGPGPSLG | Negative |
| P22692 | LGDEAIHCPPCSEEKLARCR | Negative |
| P22692 | AIHCPPCSEEKLARCRPPVG | Negative |
| P22692 | LLAAGPGPSLGDEAIHCPPC | Negative |
| P22692 | GPSLGDEAIHCPPCSEEKLA | Negative |
| P22692 | AGPGPSLGDEAIHCPPCSEE | Negative |
| P22692 | AAGPGPSLGDEAIHCPPCSE | Negative |
| P22692 | PCSEEKLARCRPPVGCEELV | Negative |
| P22692 | CSEEKLARCRPPVGCEELVR | Negative |
| P22692 | PSLGDEAIHCPPCSEEKLAR | Negative |
| P22692 | CPPCSEEKLARCRPPVGCEE | Negative |
| P22692 | ALLLAAGPGPSLGDEAIHCP | Negative |
| P22692 | CLVAALLLAAGPGPSLGDEA | Negative |
| P22692 | EAIHCPPCSEEKLARCRPPV | Negative |
| P22692 | LLLAAGPGPSLGDEAIHCPP | Negative |
| P22692 | IHCPPCSEEKLARCRPPVGC | Negative |
| P22692 | GDEAIHCPPCSEEKLARCRP | Negative |
| P22692 | LVAALLLAAGPGPSLGDEAI | Negative |
| P22692 | PGPSLGDEAIHCPPCSEEKL | Negative |
| P22692 | PPCSEEKLARCRPPVGCEEL | Negative |
| P22748 | ARPSASAESHWCYEVQAESS | Negative |
| P22748 | AARPSASAESHWCYEVQAES | Negative |
| P22748 | LLALSAARPSASAESHWCYE | Negative |
| P22748 | SASAESHWCYEVQAESSNYP | Negative |
| P22748 | VQAESSNYPCLVPVKWGGNC | Negative |
| P22748 | ALSAARPSASAESHWCYEVQ | Negative |
| P22748 | WCYEVQAESSNYPCLVPVKW | Negative |
| P22748 | RPSASAESHWCYEVQAESSN | Negative |
| P22748 | LALSAARPSASAESHWCYEV | Negative |
| P22748 | ESSNYPCLVPVKWGGNCQKD | Negative |

|        |                       |          |
|--------|-----------------------|----------|
| P22748 | AESSNYPCLVPVKWGGNCQK  | Negative |
| P22748 | AESHCYEVQAESSNYPCLV   | Negative |
| P22748 | ASAESHCYEVQAESSNYPCL  | Negative |
| P22748 | LALLALSAARPSASAESHC   | Negative |
| P22748 | MRMLLALLALSAARPSASAE  | Negative |
| P22748 | PSASAESHCYEVQAESSNY   | Negative |
| P22748 | ESHCYEVQAESSNYPCLVP   | Negative |
| P22748 | SHWCYEVQAESSNYPCLVPV  | Negative |
| P22748 | EVQAESSNYPCLVPVKWGGN  | Negative |
| P22748 | SAARPSASAESHCYEVQAE   | Negative |
| P22748 | ALLALSAARPSASAESHCY   | Negative |
| P22748 | MLLALLALSAARPSASAESH  | Negative |
| P22748 | SAESHCYEVQAESSNYPCL   | Negative |
| P22748 | RMLLALLALSAARPSASAE   | Negative |
| P22748 | CYEVQAESSNYPCLVPVKWG  | Negative |
| P22748 | LSAARPSASAESHCYEVQA   | Negative |
| P22748 | HCYEVQAESSNYPCLVPVK   | Negative |
| P22748 | YEVQAESSNYPCLVPVKWGG  | Negative |
| P22748 | QAESSNYPCLVPVKWGGNCQ  | Negative |
| P22751 | VAPVWRGIAFGQSTDVNFAT  | Negative |
| P22751 | NSLLLLGSNQRFATQDVAPV  | Negative |
| P22751 | RFATQDVAPVWRGIAFGQST  | Negative |
| P22751 | NQRFATQDVAPVWRGIAFGQ  | Negative |
| P22751 | LGSNQRFATQDVAPVWRGIA  | Negative |
| P22751 | AASGLLSVALNSLLLLGSNQ  | Negative |
| P22751 | ATQDVAPVWRGIAFGQSTDV  | Negative |
| P22751 | SVALNSLLLLGSNQRFATQD  | Negative |
| P22751 | LLSVALNSLLLLGSNQRFAT  | Negative |
| P22751 | YAASGLLSVALNSLLLLGSN  | Negative |
| P22751 | GLLSVALNSLLLLGSNQRFA  | Negative |
| P22751 | FATQDVAPVWRGIAFGQSTD  | Negative |
| P22751 | MKYAASGLLSVALNSLLLLG  | Negative |
| P22751 | LLLLGSNQRFATQDVAPVWR  | Negative |
| P22751 | DVAPVWRGIAFGQSTDVNFAT | Negative |
| P22751 | SNQRFATQDVAPVWRGIAFG  | Negative |
| P22751 | LLGSNQRFATQDVAPVWRG   | Negative |
| P22751 | SLLLLGSNQRFATQDVAPVW  | Negative |
| P22751 | ASGLLSVALNSLLLLGSNQR  | Negative |
| P22751 | LLGSNQRFATQDVAPVWRGI  | Negative |
| P22751 | SGLLSVALNSLLLLGSNQRF  | Negative |
| P22751 | VALNSLLLLGSNQRFATQDV  | Negative |
| P22751 | QRFATQDVAPVWRGIAFGQS  | Negative |
| P22751 | QDVAPVWRGIAFGQSTDVNF  | Negative |
| P22751 | LSVALNSLLLLGSNQRFATQ  | Negative |
| P22751 | TQDVAPVWRGIAFGQSTDVN  | Negative |
| P22751 | GSNQRFATQDVAPVWRGIAF  | Negative |

|        |                       |          |
|--------|-----------------------|----------|
| P22751 | LNSLLLLGSNQRFATQDVAP  | Negative |
| P22751 | KYAASGLLSVALNSLLLLGS  | Negative |
| P22864 | ARAAAVGVSGTPVGFASSAT  | Negative |
| P22864 | AAAVGVSGTPVGFASSATGG  | Negative |
| P22864 | VGVSCTPVGFASSATGGGDA  | Negative |
| P22864 | MKYAAALTAIAALAAARAAV  | Negative |
| P22864 | AVGVSGTPVGFASSATGGGD  | Negative |
| P22864 | FASSATGGGDATPVYPTTDD  | Negative |
| P22864 | SGTPVGFASSATGGGDATPV  | Negative |
| P22864 | GFASSATGGGDATPVYPTTT  | Negative |
| P22864 | ASSATGGGDATPVYPTTTDE  | Negative |
| P22864 | AALAAARAAAVGVSGTPVGFA | Negative |
| P22864 | TAIAALAAARAAAVGVSGTPV | Negative |
| P22864 | PVGFASSATGGGDATPVYPT  | Negative |
| P22864 | AARAAAVGVSGTPVGFASSA  | Negative |
| P22864 | LTAIALAAARAAAVGVSGTP  | Negative |
| P22864 | YAAALTAIALAAARAAAVGV  | Negative |
| P22864 | AIALAAARAAAVGVSGTPVG  | Negative |
| P22864 | VGFASSATGGGDATPVYPTT  | Negative |
| P22864 | ALTAIALAAARAAAVGVSGT  | Negative |
| P22864 | RAAAVGVSGTPVGFASSATG  | Negative |
| P22864 | TPVGFASSATGGGDATPVYP  | Negative |
| P22864 | IAALAAARAAAVGVSGTPVGF | Negative |
| P22864 | AAALTAIALAAARAAAVGV   | Negative |
| P22864 | KYAAALTAIALAAARAAAVG  | Negative |
| P22864 | GVSGTPVGFASSATGGGDAT  | Negative |
| P22864 | GTPVGFASSATGGGDATPVY  | Negative |
| P22864 | AAVGVSGTPVGFASSATGGG  | Negative |
| P22864 | VSGTPVGFASSATGGGDATP  | Negative |
| P22864 | ALAAARAAAVGVSGTPVGFAS | Negative |
| P22864 | LAARAAAVGVSGTPVGFASS  | Negative |
| P22865 | DTNSDIAKQDATISSAQSAK  | Negative |
| P22865 | TNSDIAKQDATISSAQSAKA  | Negative |
| P22865 | AILMSTVILSAAAPLSGVYA  | Negative |
| P22865 | GVYADTNSDIAKQDATISSA  | Negative |
| P22865 | APLSGVYADTNSDIAKQDAT  | Negative |
| P22865 | LSGVYADTNSDIAKQDATIS  | Negative |
| P22865 | VILSAAAPLSGVYADTNSDI  | Negative |
| P22865 | PLSGVYADTNSDIAKQDATI  | Negative |
| P22865 | NSDIAKQDATISSAQSAKAQ  | Negative |
| P22865 | ILMSTVILSAAAPLSGVYAD  | Negative |
| P22865 | ISAILMSTVILSAAAPLSGV  | Negative |
| P22865 | IISAILMSTVILSAAAPLSG  | Negative |
| P22865 | LMSTVILSAAAPLSGVYADT  | Negative |
| P22865 | SGVYADTNSDIAKQDATISS  | Negative |
| P22865 | SAILMSTVILSAAAPLSGVY  | Negative |

|        |                      |          |
|--------|----------------------|----------|
| P22865 | AAAPLSGVYADTNSDIAKQD | Negative |
| P22865 | ILSAAAPLSGVYADTNSDIA | Negative |
| P22865 | ADTNSDIAKQDATISSAQSA | Negative |
| P22865 | AAPLSGVYADTNSDIAKQDA | Negative |
| P22865 | YADTNSDIAKQDATISSAQS | Negative |
| P22865 | KKIISAILMSTVILSAAAPL | Negative |
| P22865 | KIISAILMSTVILSAAAPLS | Negative |
| P22865 | LSAAAPLSGVYADTNSDIAK | Negative |
| P22865 | KKKIISAILMSTVILSAAAP | Negative |
| P22865 | VYADTNSDIAKQDATISSAQ | Negative |
| P22865 | SAAAPLSGVYADTNSDIAKQ | Negative |
| P22865 | MSTVILSAAAPLSGVYADTN | Negative |
| P22865 | STVILSAAAPLSGVYADTNS | Negative |
| P22865 | MKKKIISAILMSTVILSAAA | Negative |
| P22894 | ISKAFPVSSKEKNTKTVQDY | Negative |
| P22894 | LLLLHVQISKAFPVSSKEKN | Negative |
| P22894 | LHVQISKAFPVSSKEKNTKT | Negative |
| P22894 | EKNTKTVQDYLEKFYQLPSN | Negative |
| P22894 | QISKAFPVSSKEKNTKTVQD | Negative |
| P22894 | VQISKAFPVSSKEKNTKTVQ | Negative |
| P22894 | PVSSKEKNTKTVQDYLEKFY | Negative |
| P22894 | LLHVQISKAFPVSSKEKNTK | Negative |
| P22894 | VSSKEKNTKTVQDYLEKFYQ | Negative |
| P22894 | SLKTLPFLLLLHVQISKAFP | Negative |
| P22894 | TKTVQDYLEKFYQLPSNQYQ | Negative |
| P22894 | FSLKTLPFLLLLHVQISKAF | Negative |
| P22894 | LKTLPFLLLLHVQISKAFPV | Negative |
| P22894 | SKEKNTKTVQDYLEKFYQLP | Negative |
| P22894 | SSKEKNTKTVQDYLEKFYQL | Negative |
| P22894 | FPVSSKEKNTKTVQDYLEKF | Negative |
| P22894 | LLHVQISKAFPVSSKEKNT  | Negative |
| P22894 | LPFLLLLHVQISKAFPVSSK | Negative |
| P22894 | KNTKTVQDYLEKFYQLPSNQ | Negative |
| P22894 | PFLLLLHVQISKAFPVSSKE | Negative |
| P22894 | NTKTVQDYLEKFYQLPSNQY | Negative |
| P22894 | KTLPFLLLLHVQISKAFPVS | Negative |
| P22894 | KEKNTKTVQDYLEKFYQLPS | Negative |
| P22894 | KAFPVSSKEKNTKTVQDYLE | Negative |
| P22894 | MFSLKTLPFLLLLHVQISKA | Negative |
| P22894 | HVQISKAFPVSSKEKNTKTV | Negative |
| P22894 | FLLLLHVQISKAFPVSSKEK | Negative |
| P22894 | AFPVSSKEKNTKTVQDYLEK | Negative |
| P22894 | SKAFPVSSKEKNTKTVQDYL | Negative |
| P22922 | KNGNDNFTARMFTEVVKNP  | Negative |
| P22922 | MAAVTNLSNVLKNGNDNFTA | Negative |
| P22922 | NVLKNGNDNFTARMFTEVVK | Negative |

|        |                      |          |
|--------|----------------------|----------|
| P22922 | SNVLKNGNDNFTARMFTEVV | Negative |
| P22922 | NDNFTARMFTEVVKNNPGKS | Negative |
| P22922 | IAAMAAVTNLSNVLKNGNDN | Negative |
| P22922 | MKTIICLFTIAIAAMAAVTN | Negative |
| P22922 | NLSNVLKNGNDNFTARMFTE | Negative |
| P22922 | NGNDNFTARMFTEVVKNNPG | Negative |
| P22922 | VLKNGNDNFTARMFTEVVKN | Negative |
| P22922 | IICLFTIAIAAMAAVTNLSN | Negative |
| P22922 | AIAAMAAVTNLSNVLKNGND | Negative |
| P22922 | VTNLSNVLKNGNDNFTARMF | Negative |
| P22922 | ICLFTIAIAAMAAVTNLSNV | Negative |
| P22922 | TNLSNVLKNGNDNFTARMFT | Negative |
| P22922 | GNDNFTARMFTEVVKNNPGK | Negative |
| P22922 | LKNGNDNFTARMFTEVVKNN | Negative |
| P22922 | AMAAVTNLSNVLKNGNDNFT | Negative |
| P22922 | DNFTARMFTEVVKNNPGKSI | Negative |
| P22922 | CLFTIAIAAMAAVTNLSNVL | Negative |
| P22922 | FTIAIAAMAAVTNLSNVLKN | Negative |
| P22922 | AAMAAVTNLSNVLKNGNDNF | Negative |
| P22922 | TIAIAAMAAVTNLSNVLKNG | Negative |
| P22922 | AVTNLSNVLKNGNDNFTARM | Negative |
| P22922 | LSNVLKNGNDNFTARMFTEV | Negative |
| P22922 | LFTIAIAAMAAVTNLSNVLK | Negative |
| P22922 | TIICLFTIAIAAMAAVTNLS | Negative |
| P22922 | AAVTNLSNVLKNGNDNFTAR | Negative |
| P22922 | IAIAAMAAVTNLSNVLKNGN | Negative |
| P22952 | LLTPSGPLASASPIEAAEA  | Negative |
| P22952 | SGLLCAVLAMLLLTPSGPLA | Negative |
| P22952 | LCAVLAMLLLTPSGPLASAS | Negative |
| P22952 | RVSPSGLLCAVLAMLLLTP  | Negative |
| P22952 | LTSRATRVSPSGLLCAVLA  | Negative |
| P22952 | RATRVSPSGLLCAVLAMLL  | Negative |
| P22952 | VSPSGLLCAVLAMLLLTPS  | Negative |
| P22952 | PSPSGLLCAVLAMLLLTPSG | Negative |
| P22952 | AVLAMLLLTPSGPLASASPI | Negative |
| P22952 | SGPLASASPIEAAEA VVRE | Negative |
| P22952 | VLAMLLLTPSGPLASASPIE | Negative |
| P22952 | LLCAVLAMLLLTPSGPLASA | Negative |
| P22952 | GLLCAVLAMLLLTPSGPLAS | Negative |
| P22952 | SRATRVSPSGLLCAVLAML  | Negative |
| P22952 | LLTSRATRVSPSGLLCAVL  | Negative |
| P22952 | MLLLTPSGPLASASPIEAAE | Negative |
| P22952 | PSGPLASASPIEAAEA VVR | Negative |
| P22952 | TPSGPLASASPIEAAEA VV | Negative |
| P22952 | TSRATRVSPSGLLCAVLAM  | Negative |
| P22952 | SPSGLLCAVLAMLLLTPSGP | Negative |



|        |                       |          |
|--------|-----------------------|----------|
| P22952 | RLLTSRATRVPSPSGLLCAV  | Negative |
| P22952 | LTPSGPLASASPIEAAEAAV  | Negative |
| P22952 | ATRVSPSPSGLLCAVLAMLLL | Negative |
| P22952 | LLTPSGPLASASPIEAAEAA  | Negative |
| P22952 | TRVSPSPSGLLCAVLAMLLLT | Negative |
| P22952 | MRLTSRATRVPSPSGLLCA   | Negative |
| P22952 | AMLLLTSGPLASASPIEAA   | Negative |
| P22952 | CAVLAMLLLTSGPLASASP   | Negative |
| P22952 | PSGLLCAVLAMLLLTSGPL   | Negative |
| P22969 | LLLSQLPRELSGQKPDDVIK  | Negative |
| P22969 | WLLLSQLPRELSGQKPDDVI  | Negative |
| P22969 | KPDDVIKACGRELARLRIEI  | Negative |
| P22969 | LSGQKPDDVIKACGRELARL  | Negative |
| P22969 | LPRELSGQKPDDVIKACGRE  | Negative |
| P22969 | DVIKACGRELARLRIEICGS  | Negative |
| P22969 | ELSGQKPDDVIKACGRELAR  | Negative |
| P22969 | PDDVIKACGRELARLRIEIC  | Negative |
| P22969 | SHVLGAWLLLSQLPRELSGQ  | Negative |
| P22969 | QKPDDVIKACGRELARLRIE  | Negative |
| P22969 | SGQKPDDVIKACGRELARLR  | Negative |
| P22969 | RRLFLSHVLGAWLLLSQLPR  | Negative |
| P22969 | RLFLSHVLGAWLLLSQLPRE  | Negative |
| P22969 | FLSHVLGAWLLLSQLPRELS  | Negative |
| P22969 | LGAWLLLSQLPRELSGQKPD  | Negative |
| P22969 | DDVIKACGRELARLRIEICG  | Negative |
| P22969 | LLSQLPRELSGQKPDDVIKA  | Negative |
| P22969 | MRRLFLSHVLGAWLLLSQLP  | Negative |
| P22969 | PRELSGQKPDDVIKACGREL  | Negative |
| P22969 | VLGAWLLLSQLPRELSGQKP  | Negative |
| P22969 | LSHVLGAWLLLSQLPRELSG  | Negative |
| P22969 | GQKPDDVIKACGRELARLR   | Negative |
| P22969 | HVLGAWLLLSQLPRELSGQK  | Negative |
| P22969 | LSQLPRELSGQKPDDVIKAC  | Negative |
| P22969 | QLPRELSGQKPDDVIKACGR  | Negative |
| P22969 | RELSGQKPDDVIKACGRELA  | Negative |
| P22969 | LFLSHVLGAWLLLSQLPREL  | Negative |
| P22969 | SQLPRELSGQKPDDVIKACG  | Negative |
| P22969 | AWLLLSQLPRELSGQKPDDV  | Negative |
| P23028 | AASIPRPSLNIMLFGNMIQC  | Negative |
| P23028 | GVCVSLLGAASIPRPSLNIM  | Negative |
| P23028 | LGVCVSLLGAASIPRPSLNI  | Negative |
| P23028 | MLFGNMIQCTIPCEQSWLGY  | Negative |
| P23028 | VLLGVCVSLLGAASIPRPSL  | Negative |
| P23028 | LLGVCVSLLGAASIPRPSLN  | Negative |
| P23028 | PSLNIMLFGNMIQCTIPCEQ  | Negative |
| P23028 | LLVLLGVCVSLLGAASIPRP  | Negative |

|        |                        |          |
|--------|------------------------|----------|
| P23028 | AHLLVLLGVCVSSLGAASIP   | Negative |
| P23028 | MHPAHLVLLGVCVSSLGAA    | Negative |
| P23028 | NIMLFGNMIQCTIPCEQSWL   | Negative |
| P23028 | SLLGAASIPRPSLNIMLFGN   | Negative |
| P23028 | LVLLGVCVSSLGAASIPRPS   | Negative |
| P23028 | PAHLVLLGVCVSSLGAASI    | Negative |
| P23028 | HPAHLVLLGVCVSSLGAAS    | Negative |
| P23028 | ASIPRPSLNIMLFGNMIQCT   | Negative |
| P23028 | LGAASIPRPSLNIMLFGNMI   | Negative |
| P23028 | RPSLNIMLFGNMIQCTIPCE   | Negative |
| P23028 | VCVSSLGAASIPRPSLNIML   | Negative |
| P23028 | LNIMLFGNMIQCTIPCEQSW   | Negative |
| P23028 | LLGAASIPRPSLNIMLFGNM   | Negative |
| P23028 | PRPSLNIMLFGNMIQCTIPC   | Negative |
| P23028 | IMLFGNMIQCTIPCEQSWLG   | Negative |
| P23028 | SIPRPSLNIMLFGNMIQCTI   | Negative |
| P23028 | CVSLLGAASIPRPSLNIMLF   | Negative |
| P23028 | SLNIMLFGNMIQCTIPCEQS   | Negative |
| P23028 | VSLLGAASIPRPSLNIMLFG   | Negative |
| P23028 | GAASIPRPSLNIMLFGNMIQ   | Negative |
| P23028 | IPRPSLNIMLFGNMIQCTIP   | Negative |
| P23030 | MTISASDYRHPGNFLKRTTA   | Negative |
| P23030 | LKRTTALLCVGTALTALAFN   | Negative |
| P23030 | ALTALAFNASAAC TYTIDSE  | Negative |
| P23030 | RTTALLCVGTALTALAFNAS   | Negative |
| P23030 | TALAFNASAAC TYTIDSEWS  | Negative |
| P23030 | LCVGTALTALAFNASAAC TY  | Negative |
| P23030 | GNFLKRRTTALLCVGTALTAL  | Negative |
| P23030 | KRTTALLCVGTALTALAFNA   | Negative |
| P23030 | ISASDYRHPGNFLKRRTTALL  | Negative |
| P23030 | ASDYRHPGNFLKRRTTALLCV  | Negative |
| P23030 | YRHPGNFLKRRTTALLCVGTA  | Negative |
| P23030 | ALAFNASAAC TYTIDSEWST  | Negative |
| P23030 | HPGNFLKRRTTALLCVGTALT  | Negative |
| P23030 | TTALLCVGTALTALAFNASA   | Negative |
| P23030 | PGNFLKRRTTALLCVGTALTA  | Negative |
| P23030 | VGTTALTALAFNASAAC TYTI | Negative |
| P23030 | LTALAFNASAAC TYTIDSEW  | Negative |
| P23030 | DYRHPGNFLKRRTTALLCVGT  | Negative |
| P23030 | TISASDYRHPGNFLKRRTTAL  | Negative |
| P23030 | GTALTALAFNASAAC TYTID  | Negative |
| P23030 | FLKRRTTALLCVGTALTALAF  | Negative |
| P23030 | RHPGNFLKRRTTALLCVGTAL  | Negative |
| P23030 | LLCVGTALTALAFNASAAC T  | Negative |
| P23030 | TALLCVGTALTALAFNASAA   | Negative |
| P23030 | TALTALAFNASAAC TYTIDS  | Negative |

|        |                       |          |
|--------|-----------------------|----------|
| P23030 | SASDYRHPGNFLKRTTALLC  | Negative |
| P23030 | ALLCVGTALTALAFNASAAC  | Negative |
| P23030 | SDYRHPGNFLKRTTALLCVG  | Negative |
| P23030 | NFLKRTTALLCVGTALTALA  | Negative |
| P23031 | TPNILAKVFKRTCGLVSTGA  | Negative |
| P23031 | NKTPNILAKVFKRTCGLVST  | Negative |
| P23031 | LVSTGAALAILSQAASAAC   | Negative |
| P23031 | ILSQAASAAC TYTIDSEWST | Negative |
| P23031 | LAKVFKRTCGLVSTGAALAI  | Negative |
| P23031 | VSTGAALAILSQAASAAC TY | Negative |
| P23031 | KVFKRTCGLVSTGAALAILS  | Negative |
| P23031 | PNILAKVFKRTCGLVSTGAA  | Negative |
| P23031 | NHNKTPNILAKVFKRTCGLV  | Negative |
| P23031 | MINHNKTPNILAKVFKRTCGL | Negative |
| P23031 | GLVSTGAALAILSQAASAAC  | Negative |
| P23031 | ILAKVFKRTCGLVSTGAALA  | Negative |
| P23031 | FKRTCGLVSTGAALAILSQA  | Negative |
| P23031 | AKVFKRTCGLVSTGAALAIL  | Negative |
| P23031 | GAALAILSQAASAAC TYTID | Negative |
| P23031 | AILSQAASAAC TYTIDSEWS | Negative |
| P23031 | CGLVSTGAALAILSQAASAA  | Negative |
| P23031 | TGAALAILSQAASAAC TYTI | Negative |
| P23031 | KRTCGLVSTGAALAILSQAA  | Negative |
| P23031 | ALAILSQAASAAC TYTIDSE | Negative |
| P23031 | INHNKTPNILAKVFKRTCGL  | Negative |
| P23031 | TCGLVSTGAALAILSQAASA  | Negative |
| P23031 | VFKRTCGLVSTGAALAILSQ  | Negative |
| P23031 | NILAKVFKRTCGLVSTGAAL  | Negative |
| P23031 | KTPNILAKVFKRTCGLVSTG  | Negative |
| P23031 | AALAILSQAASAAC TYTIDS | Negative |
| P23031 | HNKTPNILAKVFKRTCGLVS  | Negative |
| P23031 | RTCGLVSTGAALAILSQAAS  | Negative |
| P23031 | LAILSQAASAAC TYTIDSEW | Negative |
| P23035 | AQETA VSSHEQDHPACHRIA | Negative |
| P23035 | PPSVSRALLLAGLGCLLP    | Negative |
| P23035 | VSRALLLAGLGCLLP       | Negative |
| P23035 | LLLAGLGCLLP           | Negative |
| P23035 | GLGCLLP               | Negative |
| P23035 | SVSRALLLAGLGCLLP      | Negative |
| P23035 | PGFLADEAQETA VSSHEQDH | Negative |
| P23035 | QETA VSSHEQDHPACHRIAP | Negative |
| P23035 | TAVSSHEQDHPACHRIAPSL  | Negative |
| P23035 | EAQETA VSSHEQDHPACHRI | Negative |
| P23035 | ADEAQETA VSSHEQDHPACH | Negative |
| P23035 | LADEAQETA VSSHEQDHPAC | Negative |
| P23035 | ETA VSSHEQDHPACHRIAPS | Negative |

|        |                       |          |
|--------|-----------------------|----------|
| P23035 | MPPSVSRALLLLAGLGCLLP  | Negative |
| P23035 | SRALLLLAGLGCLLPGLAD   | Negative |
| P23035 | RALLLLAGLGCLLPGLADE   | Negative |
| P23035 | FLADEAQETA VSSHEQDHPA | Negative |
| P23035 | LPGFLADEAQETA VSSHEQD | Negative |
| P23035 | CLLPGLADEAQETA VSSHE  | Negative |
| P23035 | LLPGFLADEAQETA VSSHEQ | Negative |
| P23035 | GFLADEAQETA VSSHEQDHP | Negative |
| P23035 | LGCLLPGLADEAQETA VSS  | Negative |
| P23035 | PSVSRALLLLAGLGCLLPGF  | Negative |
| P23035 | DEAQETA VSSHEQDHPACHR | Negative |
| P23035 | ALLLLAGLGCLLPGLADEA   | Negative |
| P23035 | LLAGLGCLLPGLADEAQET   | Negative |
| P23035 | AGLGCLLPGLADEAQETA V  | Negative |
| P23035 | LAGLGCLLPGLADEAQETA   | Negative |
| P23035 | GCLLPGLADEAQETA VSSH  | Negative |
| P23044 | TIYYAGVAESSGEFGVWSAT  | Negative |
| P23044 | YAGVAESSGEFGVWSATQTP  | Negative |
| P23044 | ASATIYYAGVAESSGEFGVW  | Negative |
| P23044 | ASLLSGASATIYYAGVAESS  | Negative |
| P23044 | ALASLLSGASATIYYAGVAE  | Negative |
| P23044 | SLLSGASATIYYAGVAESSG  | Negative |
| P23044 | AESSGEFGVWSATQTPGTGL  | Negative |
| P23044 | LASLLSGASATIYYAGVAES  | Negative |
| P23044 | IYYAGVAESSGEFGVWSATQ  | Negative |
| P23044 | LLSGASATIYYAGVAESSGE  | Negative |
| P23044 | AGVAESSGEFGVWSATQTPG  | Negative |
| P23044 | SGASATIYYAGVAESSGEFG  | Negative |
| P23044 | VAESSGEFGVWSATQTPGTG  | Negative |
| P23044 | GASATIYYAGVAESSGEFGV  | Negative |
| P23044 | VFSALASLLSGASATIYYAG  | Negative |
| P23044 | ESSGEFGVWSATQTPGTGLP  | Negative |
| P23044 | ATIYYAGVAESSGEFGVWSA  | Negative |
| P23044 | GVAESSGEFGVWSATQTPGT  | Negative |
| P23044 | SGEFGVWSATQTPGTGLPGR  | Negative |
| P23044 | YYAGVAESSGEFGVWSATQT  | Negative |
| P23044 | FSALASLLSGASATIYYAGV  | Negative |
| P23044 | LSGASATIYYAGVAESSGEF  | Negative |
| P23044 | GEFGVWSATQTPGTGLPGRF  | Negative |
| P23044 | EFGVWSATQTPGTGLPGRFG  | Negative |
| P23044 | SSGEFGVWSATQTPGTGLPG  | Negative |
| P23044 | SALASLLSGASATIYYAGVA  | Negative |
| P23044 | MKLVFSALASLLSGASATIY  | Negative |
| P23044 | SATIYYAGVAESSGEFGVWS  | Negative |
| P23044 | KLVSALASLLSGASATIYY   | Negative |
| P23061 | RQRRCSAAGGNWYPVGGGGI  | Negative |

|        |                      |          |
|--------|----------------------|----------|
| P23061 | ISLIASLYQVEVDAHGYMTF | Negative |
| P23061 | VEVDAHGYMTFPIARQRRC  | Negative |
| P23061 | MNKLILISLIASLYQVEVDA | Negative |
| P23061 | GYMTFPIARQRRC        | Negative |
| P23061 | YMTFPIARQRRC         | Negative |
| P23061 | KLILISLIASLYQVEVDAH  | Negative |
| P23061 | LYQVEVDAHGYMTFPIARQR | Negative |
| P23061 | LIASLYQVEVDAHGYMTFPI | Negative |
| P23061 | PIARQRRC             | Negative |
| P23061 | LILISLIASLYQVEVDAHGY | Negative |
| P23061 | AHGYMTFPIARQRRC      | Negative |
| P23061 | MTFPIARQRRC          | Negative |
| P23061 | DAHGYMTFPIARQRRC     | Negative |
| P23061 | IARQRRC              | Negative |
| P23061 | VDAHGYMTFPIARQRRC    | Negative |
| P23061 | ASLYQVEVDAHGYMTFPIAR | Negative |
| P23061 | YQVEVDAHGYMTFPIARQR  | Negative |
| P23061 | TFPIARQRRC           | Negative |
| P23061 | ARQRRC               | Negative |
| P23061 | FPIARQRRC            | Negative |
| P23061 | EVDAGHYMTFPIARQRRC   | Negative |
| P23061 | IASLYQVEVDAHGYMTFPIA | Negative |
| P23061 | ILISLIASLYQVEVDAHGYM | Negative |
| P23061 | SLYQVEVDAHGYMTFPIARQ | Negative |
| P23061 | NKLILISLIASLYQVEVDAH | Negative |
| P23061 | SLIASLYQVEVDAHGYMTFP | Negative |
| P23061 | HGYMTFPIARQRRC       | Negative |
| P23061 | QVEVDAHGYMTFPIARQRRC | Negative |
| P23141 | HGKVLGKFVSLEGFAQPVAI | Negative |
| P23141 | AFILATLSASA          | Negative |
| P23141 | ILATLSASA            | Negative |
| P23141 | TLSASA               | Negative |
| P23141 | WGHPSPPVDTVHGKVLGK   | Negative |
| P23141 | SSPPVDTVHGKVLGKFVSL  | Negative |
| P23141 | SASA                 | Negative |
| P23141 | SPPVDTVHGKVLGKFVSLE  | Negative |
| P23141 | AWGHPSPPVDTVHGKVLG   | Negative |
| P23141 | FILATLSASA           | Negative |
| P23141 | PPVDTVHGKVLGKFVSLEG  | Negative |
| P23141 | LATLSASA             | Negative |
| P23141 | ATLSASA              | Negative |
| P23141 | DTVHGKVLGKFVSLEGFAQP | Negative |
| P23141 | PVVDTVHGKVLGKFVSLEGF | Negative |
| P23141 | VDTVHGKVLGKFVSLEGFAQ | Negative |
| P23141 | ASA                  | Negative |
| P23141 | PSSPPVDTVHGKVLGKFVS  | Negative |

|        |                       |          |
|--------|-----------------------|----------|
| P23141 | VHGKVLGKFVSLEGFAQPVA  | Negative |
| P23141 | GHPSSPPVVDTVHGKVLGKF  | Negative |
| P23141 | AAWGHPSPPVVDTVHGKVL   | Negative |
| P23141 | SAAWGHPSPPVVDTVHGKV   | Negative |
| P23141 | VVDTVHGKVLGKFVSLEGFA  | Negative |
| P23141 | WLRAFILATLSASAAWGHP   | Negative |
| P23141 | RAFILATLSASAAWGHPSSP  | Negative |
| P23141 | HPSSPPVVDTVHGKVLGKFV  | Negative |
| P23141 | LSASAAWGHPSSPPVVDTVH  | Negative |
| P23141 | MWLRAFILATLSASAAWGHP  | Negative |
| P23141 | TVHGKVLGKFVSLEGFAQPV  | Negative |
| P23142 | RRVPLLLLLGGLALLAAGV   | Negative |
| P23142 | MERAAPSRRVPLLLLLGGL   | Negative |
| P23142 | RAAPSRRVPLLLLLGGLAL   | Negative |
| P23142 | GVDADVLEACCADGHRMAT   | Negative |
| P23142 | LLLLGGLALLAAGVDADVLL  | Negative |
| P23142 | ERAAPSRRVPLLLLLGGLA   | Negative |
| P23142 | LPLLLLGGGLALLAAGVDADV | Negative |
| P23142 | AAGVDADVLEACCADGHRM   | Negative |
| P23142 | PLLLLGGGLALLAAGVDADV  | Negative |
| P23142 | AAPSRRVPLLLLLGGLALL   | Negative |
| P23142 | LLAAGVDADVLEACCADGH   | Negative |
| P23142 | LAAGVDADVLEACCADGHR   | Negative |
| P23142 | RVPLPLLLLGGGLALLAAGVD | Negative |
| P23142 | GGLALLAAGVDADVLEACC   | Negative |
| P23142 | VDADVLEACCADGHRMATH   | Negative |
| P23142 | APSRRVPLLLLLGGLALLA   | Negative |
| P23142 | LALLAAGVDADVLEACCAD   | Negative |
| P23142 | VPLPLLLLGGGLALLAAGVDA | Negative |
| P23142 | DADVLEACCADGHRMATHQ   | Negative |
| P23142 | PSRRVPLPLLLLGGGLALLA  | Negative |
| P23142 | ADVLEACCADGHRMATHQK   | Negative |
| P23142 | LLGGLALLAAGVDADVLEA   | Negative |
| P23142 | LGGLALLAAGVDADVLEAC   | Negative |
| P23142 | PLPLLLLGGGLALLAAGVDAD | Negative |
| P23142 | SRRVPLPLLLLGGGLALLAAG | Negative |
| P23142 | DVLEACCADGHRMATHQKD   | Negative |
| P23142 | AGVDADVLEACCADGHRMA   | Negative |
| P23142 | GLALLAAGVDADVLEACCA   | Negative |
| P23142 | ALLAAGVDADVLEACCADG   | Negative |
| P23284 | LAAALIAGSVFFLLLPGPSA  | Negative |
| P23284 | MKVLLAAALIAGSVFFLLLP  | Negative |
| P23284 | SVFFLLLPGPSAADEKKGKGP | Negative |
| P23284 | LIAGSVFFLLLPGPSAADEK  | Negative |
| P23284 | PGPSAADEKKGKGPVTVKVY  | Negative |
| P23284 | LRLSERNMKVLLAAALIAGS  | Negative |

|        |                      |          |
|--------|----------------------|----------|
| P23284 | FLLPGPSAADEKKKGPKVT  | Negative |
| P23284 | ERNMKVLLAAALIAGSVFFL | Negative |
| P23284 | GSVFFLLPGPSAADEKKKG  | Negative |
| P23284 | RLSERNMKVLLAAALIAGSV | Negative |
| P23284 | PSAADEKKKGPKVTVKVYFD | Negative |
| P23284 | IAGSVFFLLPGPSAADEKK  | Negative |
| P23284 | RNMKVLLAAALIAGSVFFLL | Negative |
| P23284 | FFLLPGPSAADEKKKGPKV  | Negative |
| P23284 | ALIAGSVFFLLPGPSAADE  | Negative |
| P23284 | LPGPSAADEKKKGPKVTVKV | Negative |
| P23284 | LLPGPSAADEKKKGPKVTVK | Negative |
| P23284 | LLPGPSAADEKKKGPKVTV  | Negative |
| P23284 | NMKVLLAAALIAGSVFFLL  | Negative |
| P23284 | LSERNMKVLLAAALIAGSVF | Negative |
| P23284 | VLLAAALIAGSVFFLLPGP  | Negative |
| P23284 | LLAAALIAGSVFFLLPGPS  | Negative |
| P23284 | SERNMKVLLAAALIAGSVFF | Negative |
| P23284 | KVLLAAALIAGSVFFLLPG  | Negative |
| P23284 | MLRLSERNMKVLLAAALIAG | Negative |
| P23284 | AALIAGSVFFLLPGPSAAD  | Negative |
| P23284 | GPSAADEKKKGPKVTVKVYF | Negative |
| P23284 | AAALIAGSVFFLLPGPSAA  | Negative |
| P23284 | VFFLLPGPSAADEKKKGPK  | Negative |
| P23360 | ASPILEERQAAQSVDQLIKA | Negative |
| P23360 | SLLLAPFAAASPILEERQAA | Negative |
| P23360 | AQSVDQLIKARGKVYFGVAT | Negative |
| P23360 | EERQAAQSVDQLIKARGKVY | Negative |
| P23360 | LLLAPFAAASPILEERQAAQ | Negative |
| P23360 | ILLTSLLLAPFAAASPILEE | Negative |
| P23360 | SPILEERQAAQSVDQLIKAR | Negative |
| P23360 | TSLLLAPFAAASPILEERQA | Negative |
| P23360 | FAAASPILEERQAAQSVDQL | Negative |
| P23360 | AAASPILEERQAAQSVDQLI | Negative |
| P23360 | ERQAAQSVDQLIKARGKVYF | Negative |
| P23360 | AAQSVDQLIKARGKVYFGVA | Negative |
| P23360 | LEERQAAQSVDQLIKARGKV | Negative |
| P23360 | RPTILLTSLLLAPFAAASPI | Negative |
| P23360 | RQAAQSVDQLIKARGKVYFG | Negative |
| P23360 | PTILLTSLLLAPFAAASPIL | Negative |
| P23360 | PILEERQAAQSVDQLIKARG | Negative |
| P23360 | PFAAASPILEERQAAQSVDQ | Negative |
| P23360 | QSVDQLIKARGKVYFGVATD | Negative |
| P23360 | QAAQSVDQLIKARGKVYFGV | Negative |
| P23360 | LTSLLLAPFAAASPILEERQ | Negative |
| P23360 | APFAAASPILEERQAAQSVD | Negative |
| P23360 | AASPILEERQAAQSVDQLIK | Negative |

|        |                       |          |
|--------|-----------------------|----------|
| P23360 | LAPFAAASPILEERQAAQSV  | Negative |
| P23360 | LLTSLLLAPFAAASPILEER  | Negative |
| P23360 | MVRPTILLTSLLLAPFAAAS  | Negative |
| P23360 | VRPTILLTSLLLAPFAAASP  | Negative |
| P23360 | ILEERQAAQSVDQLIKARGK  | Negative |
| P23360 | TILLTSLLLAPFAAASPILE  | Negative |
| P23389 | NHNEEVVTHCIEVLSNALL   | Negative |
| P23389 | GATVVAAVSSMPVDIRNHNE  | Negative |
| P23389 | LLGATVVAAVSSMPVDIRNH  | Negative |
| P23389 | HNEEVVTHCIEVLSNALLK   | Negative |
| P23389 | EEVVTHCIEVLSNALLKSS   | Negative |
| P23389 | VDIRNHNEEVVTHCIEVLS   | Negative |
| P23389 | AVSSMPVDIRNHNEEVVTHC  | Negative |
| P23389 | PAALLGLLGATVVAAVSSMP  | Negative |
| P23389 | NEEVVTHCIEVLSNALLKS   | Negative |
| P23389 | AAVSSMPVDIRNHNEEVVTH  | Negative |
| P23389 | PVDIRNHNEEVVTHCIEVL   | Negative |
| P23389 | ALLGLLGATVVAAVSSMPVD  | Negative |
| P23389 | QPAALLGLLGATVVAAVSSM  | Negative |
| P23389 | ATVVAAVSSMPVDIRNHNEE  | Negative |
| P23389 | TVVAAVSSMPVDIRNHNEEV  | Negative |
| P23389 | MQPAALLGLLGATVVAAVSS  | Negative |
| P23389 | SSMPVDIRNHNEEVVTHCII  | Negative |
| P23389 | SMPVDIRNHNEEVVTHCIE   | Negative |
| P23389 | MPVDIRNHNEEVVTHCIEV   | Negative |
| P23389 | AALLGLLGATVVAAVSSMPV  | Negative |
| P23389 | LGLLGATVVAAVSSMPVDIR  | Negative |
| P23389 | VAAVSSMPVDIRNHNEEVVT  | Negative |
| P23389 | GLLGATVVAAVSSMPVDIRN  | Negative |
| P23389 | RNHNEEVVTHCIEVLSNAL   | Negative |
| P23389 | DIRNHNEEVVTHCIEVLSN   | Negative |
| P23389 | IRNHNEEVVTHCIEVLSNA   | Negative |
| P23389 | VVAAVSSMPVDIRNHNEEVV  | Negative |
| P23389 | VSSMPVDIRNHNEEVVTHCI  | Negative |
| P23389 | LGATVVAAVSSMPVDIRNHN  | Negative |
| P23472 | AIYWGQNGNEGTLTQTCSTR  | Negative |
| P23472 | IMSSSHVDGGGIAIYWGQNG  | Negative |
| P23472 | MSSSHVDGGGIAIYWGQNGN  | Negative |
| P23472 | SLIMSSSHVDGGGIAIYWGQ  | Negative |
| P23472 | LAI SLIMSSSHVDGGGIAIY | Negative |
| P23472 | AKRTQAILLLLLAISLIMSS  | Negative |
| P23472 | VDGGGIAIYWGQNGNEGTLT  | Negative |
| P23472 | GIAIYWGQNGNEGTLTQTCS  | Negative |
| P23472 | SHVDGGGIAIYWGQNGNEG   | Negative |
| P23472 | AISLIMSSSHVDGGGIAIYW  | Negative |
| P23472 | LLLLAISLIMSSSHVDGGG   | Negative |



|        |                      |          |
|--------|----------------------|----------|
| P23472 | SSHVDGGGIAIYWQNGNEG  | Negative |
| P23472 | TQAILLLLLAISLIMSSSHV | Negative |
| P23472 | IAIYWQNGNEGTLTQTCST  | Negative |
| P23472 | LIMSSSHVDGGGIAIYWQNG | Negative |
| P23472 | MAKRTQAILLLLLAISLIMS | Negative |
| P23472 | LLLAISLIMSSSHVDGGGIA | Negative |
| P23472 | RTQAILLLLLAISLIMSSSH | Negative |
| P23472 | SSSHVDGGGIAIYWQNGNE  | Negative |
| P23472 | HVDGGGIAIYWQNGNEGTL  | Negative |
| P23472 | DGGGIAIYWQNGNEGTLTQ  | Negative |
| P23472 | AILLLLLAISLIMSSSHVDG | Negative |
| P23472 | ILLLLLAISLIMSSSHVDGG | Negative |
| P23472 | QAILLLLLAISLIMSSSHVD | Negative |
| P23472 | GGIAIYWQNGNEGTLTQTC  | Negative |
| P23472 | ISLIMSSSHVDGGGIAIYWG | Negative |
| P23472 | KRTQAILLLLLAISLIMSSS | Negative |
| P23472 | GGGIAIYWQNGNEGTLTQT  | Negative |
| P23472 | LLLLAISLIMSSSHVDGGGI | Negative |
| P23515 | LTPGILCICPLQCICTERHR | Negative |
| P23515 | YQILKMSLCLFILLFLTPGI | Negative |
| P23515 | LKMSLCLFILLFLTPGILCI | Negative |
| P23515 | PGILCICPLQCICTERHRHV | Negative |
| P23515 | LCICPLQCICTERHRHVDCS | Negative |
| P23515 | LQCICTERHRHVDCSGRNLS | Negative |
| P23515 | CICTERHRHVDCSGRNLSL  | Negative |
| P23515 | PLQCICTERHRHVDCSGRNL | Negative |
| P23515 | GILCICPLQCICTERHRHVD | Negative |
| P23515 | ILKMSLCLFILLFLTPGILC | Negative |
| P23515 | MEYQILKMSLCLFILLFLTP | Negative |
| P23515 | LFLTPGILCICPLQCICTER | Negative |
| P23515 | ICPLQCICTERHRHVDCSGR | Negative |
| P23515 | TPGILCICPLQCICTERHRH | Negative |
| P23515 | LFILLFLTPGILCICPLQCI | Negative |
| P23515 | QCICTERHRHVDCSGRNLSL | Negative |
| P23515 | CPLQCICTERHRHVDCSGRN | Negative |
| P23515 | SLCLFILLFLTPGILCICPL | Negative |
| P23515 | CICPLQCICTERHRHVDCSG | Negative |
| P23515 | QILKMSLCLFILLFLTPGIL | Negative |
| P23515 | CLFILLFLTPGILCICPLQC | Negative |
| P23515 | LLFLTPGILCICPLQCICTE | Negative |
| P23515 | MSLCLFILLFLTPGILCICP | Negative |
| P23515 | ILCICPLQCICTERHRHVDC | Negative |
| P23515 | FLTPGILCICPLQCICTERH | Negative |
| P23515 | ILLFLTPGILCICPLQCICT | Negative |
| P23515 | EYQILKMSLCLFILLFLTPG | Negative |
| P23515 | FILLFLTPGILCICPLQCIC | Negative |

|        |                        |          |
|--------|------------------------|----------|
| P23515 | KMSLCLFILLFLTPGILCIC   | Negative |
| P23564 | VSLQVFAFASISSAAPTEPN   | Negative |
| P23564 | KGRKVLVSLLVSLQVFAFAS   | Negative |
| P23564 | LLVSLQVFAFASISSAAPTE   | Negative |
| P23564 | FASISSAAPTEPNIDIDMGIA  | Negative |
| P23564 | ISSAAPTEPNIDIDMGIAGLN  | Negative |
| P23564 | SNHLKGRKVLVSLLVSLQVF   | Negative |
| P23564 | KKSNHLKGRKVLVSLLVSLQ   | Negative |
| P23564 | LQVFAFASISSAAPTEPNDI   | Negative |
| P23564 | GRKVLVSLLVSLQVFAFASI   | Negative |
| P23564 | VSLLVSLQVFAFASISSAAP   | Negative |
| P23564 | MKKKSNHLKGRKVLVSLLVS   | Negative |
| P23564 | KVLVSLLVSLQVFAFASISS   | Negative |
| P23564 | FAFASISSAAPTEPNIDIDMG  | Negative |
| P23564 | KKKSNHLKGRKVLVSLLVSL   | Negative |
| P23564 | NHLKGRKVLVSLLVSLQVFA   | Negative |
| P23564 | HLKGRKVLVSLLVSLQVFAF   | Negative |
| P23564 | KSNHLKGRKVLVSLLVSLQV   | Negative |
| P23564 | QVFAFASISSAAPTEPNIDID  | Negative |
| P23564 | VLVSLLVSLQVFAFASISSA   | Negative |
| P23564 | LKGRKVLVSLLVSLQVFAFA   | Negative |
| P23564 | LVSLLVSLQVFAFASISSAA   | Negative |
| P23564 | SLLVSLQVFAFASISSAAPT   | Negative |
| P23564 | SISSAAPTEPNIDIDMGIAGL  | Negative |
| P23564 | RKVLVSLLVSLQVFAFASIS   | Negative |
| P23564 | AFASISSAAPTEPNIDIDMGI  | Negative |
| P23564 | VFAFASISSAAPTEPNIDIDM  | Negative |
| P23564 | SSAAPTEPNIDIDMGIAGLNY  | Negative |
| P23564 | ASISSAAPTEPNIDIDMGIAAG | Negative |
| P23564 | SLQVFAFASISSAAPTEPND   | Negative |
| P23631 | SLVRMRREGEDLTLEEKAEI   | Negative |
| P23631 | EDLTLEEKAEICSELELQQK   | Negative |
| P23631 | EKAEICSELELQQKYVDIAS   | Negative |
| P23631 | ANHSLVRMRREGEDLTLEEK   | Negative |
| P23631 | KAEICSELELQQKYVDIASN   | Negative |
| P23631 | MRREGEDLTLEEKAEICSEL   | Negative |
| P23631 | REGEDLTLEEKAEICSELEL   | Negative |
| P23631 | VGEIMERANHSLVRMRREGE   | Negative |
| P23631 | VRMRREGEDLTLEEKAEICS   | Negative |
| P23631 | LTLEEKAEICSELELQQKYV   | Negative |
| P23631 | DLTLEEKAEICSELELQQKY   | Negative |
| P23631 | GEDLTLEEKAEICSELELQQ   | Negative |
| P23631 | EEKAEICSELELQQKYVDIA   | Negative |
| P23631 | NHSLVRMRREGEDLTLEEKA   | Negative |
| P23631 | MERANHSLVRMRREGEDLTL   | Negative |
| P23631 | MISVGEIMERANHSLVRMRR   | Negative |

|        |                       |          |
|--------|-----------------------|----------|
| P23631 | GEIMERANHSLVRMRREGED  | Negative |
| P23631 | IMERANHSLVRMRREGEDLT  | Negative |
| P23631 | ERANHSLVRMRREGEDLTLE  | Negative |
| P23631 | RMRREGEDLTLEEKAEICSE  | Negative |
| P23631 | EGEDLTLEEKAEICSELELQ  | Negative |
| P23631 | RANHSLVRMRREGEDLTLEE  | Negative |
| P23631 | LEEKAEICSELELQQKYVDI  | Negative |
| P23631 | RREGEDLTLEEKAEICSELE  | Negative |
| P23631 | HSLVRMRREGEDLTLEEKAE  | Negative |
| P23631 | ISVGEIMERANHSLVRMRRE  | Negative |
| P23631 | LVRMRREGEDLTLEEKAEIC  | Negative |
| P23631 | SVGEIMERANHSLVRMRREG  | Negative |
| P23631 | TLEEKAEICSELELQQKYVD  | Negative |
| P23659 | TPKAEAAAGYNYGEALQKAIM | Negative |
| P23659 | EAAGYNYGEALQKAIMFYEF  | Negative |
| P23659 | TGLFIHTPKAEAAAGYNYGEA | Negative |
| P23659 | LLVTGLFIHTPKAEAAAGYNY | Negative |
| P23659 | RKFYSFAIIISLLVTGLFIH  | Negative |
| P23659 | IIISLLVTGLFIHTPKAEAA  | Negative |
| P23659 | VTGLFIHTPKAEAAAGYNYGE | Negative |
| P23659 | YNYGEALQKAIMFYEFQRS   | Negative |
| P23659 | AEAAGYNYGEALQKAIMFY   | Negative |
| P23659 | LVTGLFIHTPKAEAAAGYNYG | Negative |
| P23659 | GLFIHTPKAEAAAGYNYGEAL | Negative |
| P23659 | SFAIIISLLVTGLFIHTPKA  | Negative |
| P23659 | SLLVTGLFIHTPKAEAAAGYN | Negative |
| P23659 | KAEEAGYNYGEALQKAIMFY  | Negative |
| P23659 | IISLLVTGLFIHTPKAEAAAG | Negative |
| P23659 | AAGYNYGEALQKAIMFYEFQ  | Negative |
| P23659 | MRKFYSFAIIISLLVTGLFI  | Negative |
| P23659 | AGYNYGEALQKAIMFYEFQR  | Negative |
| P23659 | KFYSFAIIISLLVTGLFIHT  | Negative |
| P23659 | AIIISLLVTGLFIHTPKAEA  | Negative |
| P23659 | PKAEAAAGYNYGEALQKAIMF | Negative |
| P23659 | YSFAIIISLLVTGLFIHTPK  | Negative |
| P23659 | GYNYGEALQKAIMFYEFQRS  | Negative |
| P23659 | HTPKAEAAAGYNYGEALQKAI | Negative |
| P23659 | LFIHTPKAEAAAGYNYGEALQ | Negative |
| P23659 | FYSFAIIISLLVTGLFIHTP  | Negative |
| P23659 | FAIIISLLVTGLFIHTPKAE  | Negative |
| P23659 | FIHTPKAEAAAGYNYGEALQK | Negative |
| P23659 | IHTPKAEAAAGYNYGEALQKA | Negative |
| P23805 | SVLLLLTQPWRSLGAEMTTF  | Negative |
| P23805 | QPWRSLGAEMTTFQSQILAN  | Negative |
| P23805 | KILANACTLVMCSPLESGLP  | Negative |
| P23805 | QKILANACTLVMCSPLESGL  | Negative |

|        |                        |          |
|--------|------------------------|----------|
| P23805 | LLTQPWRSLSGAEMTTFSQKI  | Negative |
| P23805 | LLLLTQPWRSLSGAEMTTFSQ  | Negative |
| P23805 | WRSLSGAEMTTFSQKILANAC  | Negative |
| P23805 | MTTFSQKILANACTLVMCSP   | Negative |
| P23805 | GAEMTTFSQKILANACTLVM   | Negative |
| P23805 | SQKILANACTLVMCSPLESG   | Negative |
| P23805 | LLLTQPWRSLSGAEMTTFSQK  | Negative |
| P23805 | MLLLPLSVLLLLLTQPWRSLG  | Negative |
| P23805 | VLLLLTQPWRSLSGAEMTTFS  | Negative |
| P23805 | LGAEMTTFSQKILANACTLV   | Negative |
| P23805 | AEMTTFSQKILANACTLVMC   | Negative |
| P23805 | PWRSLSGAEMTTFSQKILANA  | Negative |
| P23805 | RSLGAEMTTFSQKILANACT   | Negative |
| P23805 | SLGAEMTTFSQKILANACTL   | Negative |
| P23805 | TTFSQKILANACTLVMCSPL   | Negative |
| P23805 | LPLSVLLLLLTQPWRSLSGAEM | Negative |
| P23805 | EMTTFSQKILANACTLVMCS   | Negative |
| P23805 | LLLPLSVLLLLLTQPWRSLSGA | Negative |
| P23805 | TQPWRSLSGAEMTTFSQKILA  | Negative |
| P23805 | FSQKILANACTLVMCSPLES   | Negative |
| P23805 | TFSQKILANACTLVMCSPLE   | Negative |
| P23805 | PLSVLLLLLTQPWRSLSGAEMT | Negative |
| P23805 | ILANACTLVMCSPLESGLPG   | Negative |
| P23805 | LLPLSVLLLLLTQPWRSLSGAE | Negative |
| P23805 | LTQPWRSLSGAEMTTFSQKIL  | Negative |
| P23806 | FIFMSFGLLVVAASLRGTGA   | Negative |
| P23806 | LSGWSSYEGHCYKAFEKYKT   | Negative |
| P23806 | RFIFMSFGLLVVAASLRGTG   | Negative |
| P23806 | GADCLSGWSSYEGHCYKAFE   | Negative |
| P23806 | LLVVAASLRGTGADCLSGWS   | Negative |
| P23806 | MSFGLLVVAASLRGTGADCL   | Negative |
| P23806 | IFMSFGLLVVAASLRGTGAD   | Negative |
| P23806 | GRFIFMSFGLLVVAASLRGT   | Negative |
| P23806 | RGTGADCLSGWSSYEGHCYK   | Negative |
| P23806 | GTGADCLSGWSSYEGHCYKA   | Negative |
| P23806 | FMSFGLLVVAASLRGTGADC   | Negative |
| P23806 | WSSYEGHCYKAFEKYKTWED   | Negative |
| P23806 | DCLSGWSSYEGHCYKAFEKY   | Negative |
| P23806 | SLRGTGADCLSGWSSYEGHC   | Negative |
| P23806 | MGRFIFMSFGLLVVAASLRG   | Negative |
| P23806 | ADCLSGWSSYEGHCYKAFEK   | Negative |
| P23806 | AASLRGTGADCLSGWSSYEG   | Negative |
| P23806 | VVAASLRGTGADCLSGWSSYE  | Negative |
| P23806 | GLLVVAASLRGTGADCLSGW   | Negative |
| P23806 | SSYEGHCYKAFEKYKTWEDA   | Negative |
| P23806 | SFGLLVVAASLRGTGADCLS   | Negative |

|        |                      |          |
|--------|----------------------|----------|
| P23806 | SGWSSYEGHCYKAFEKYKTW | Negative |
| P23806 | LVVAASLRGTGADCLSGWSS | Negative |
| P23806 | ASLRGTGADCLSGWSSYEGH | Negative |
| P23806 | TGADCLSGWSSYEGHCYKAF | Negative |
| P23806 | GWSSYEGHCYKAFEKYKTWE | Negative |
| P23806 | LRGTGADCLSGWSSYEGHCY | Negative |
| P23806 | CLSGWSSYEGHCYKAFEKYK | Negative |
| P23806 | VVAASLRGTGADCLSGWSSY | Negative |
| P23807 | IFMSFGFLVVFLSLSGTAAD | Negative |
| P23807 | RFIFMSFGFLVVFLSLSGTA | Negative |
| P23807 | WSSYEGHCYKPFSEPKNWAD | Negative |
| P23807 | FLSLSGTAADCPDWSSYEG  | Negative |
| P23807 | LVVFLSLSGTAADCPDWSS  | Negative |
| P23807 | DWSSYEGHCYKPFSEPKNWA | Negative |
| P23807 | PSDWSSYEGHCYKPFSEPKN | Negative |
| P23807 | VFLSLSGTAADCPDWSSYE  | Negative |
| P23807 | CPDWSSYEGHCYKPFSEPK  | Negative |
| P23807 | DCPDWSSYEGHCYKPFSEP  | Negative |
| P23807 | ADCPDWSSYEGHCYKPFSE  | Negative |
| P23807 | FMSFGFLVVFLSLSGTAADC | Negative |
| P23807 | GTAADCPDWSSYEGHCYKP  | Negative |
| P23807 | SFGFLVVFLSLSGTAADCPS | Negative |
| P23807 | LSGTAADCPDWSSYEGHCY  | Negative |
| P23807 | AADCPDWSSYEGHCYKPF   | Negative |
| P23807 | GFLVVFLSLSGTAADCPDW  | Negative |
| P23807 | SLSGTAADCPDWSSYEGHC  | Negative |
| P23807 | SGTAADCPDWSSYEGHCYK  | Negative |
| P23807 | SSYEGHCYKPFSEPKNWADA | Negative |
| P23807 | FIFMSFGFLVVFLSLSGTAA | Negative |
| P23807 | FLVVFLSLSGTAADCPDW   | Negative |
| P23807 | SDWSSYEGHCYKPFSEPKNW | Negative |
| P23807 | LSLSGTAADCPDWSSYEGH  | Negative |
| P23807 | GRFIFMSFGFLVVFLSLSGT | Negative |
| P23807 | MGRFIFMSFGFLVVFLSLSG | Negative |
| P23807 | TAADCPDWSSYEGHCYKPF  | Negative |
| P23807 | MSFGFLVVFLSLSGTAADCP | Negative |
| P23807 | VVFLSLSGTAADCPDWSSY  | Negative |
| P23827 | KIAPYPQAEKGMKRQVIQLT | Negative |
| P23827 | MKTILPAVLFAAFATTSABA | Negative |
| P23827 | EKIAPYPQAEKGMKRQVIQL | Negative |
| P23827 | AAESVQPLEKIAPYPQAEKG | Negative |
| P23827 | ATTSAAAEVQPLEKIAPY   | Negative |
| P23827 | TILPAVLFAAFATTSAAAE  | Negative |
| P23827 | QPLEKIAPYPQAEKGMKRQV | Negative |
| P23827 | FAAFATTSAAAEVQPLEK   | Negative |
| P23827 | ESVQPLEKIAPYPQAEKGMK | Negative |

|        |                       |          |
|--------|-----------------------|----------|
| P23827 | AFATTSAWAAESVQPLEKIA  | Negative |
| P23827 | PLEKIAPYPQAEKGMKRQVI  | Negative |
| P23827 | AESVQPLEKIAPYPQAEKGM  | Negative |
| P23827 | WAAESVQPLEKIAPYPQAEK  | Negative |
| P23827 | ILPAVLFAAFATTSAWAAES  | Negative |
| P23827 | VQPLEKIAPYPQAEKGMKRQ  | Negative |
| P23827 | LEKIAPYPQAEKGMKRQVIQ  | Negative |
| P23827 | AAFATTSAWAAESVQPLEKI  | Negative |
| P23827 | FATTSAWAAESVQPLEKIAP  | Negative |
| P23827 | IAPYPQAEKGMKRQVIQLTP  | Negative |
| P23827 | TSAWAAESVQPLEKIAPYPQ  | Negative |
| P23827 | LPAVLFAAFATTSAWAAESV  | Negative |
| P23827 | SAWAAESVQPLEKIAPYPQA  | Negative |
| P23827 | LFAAFATTSAWAAESVQPLE  | Negative |
| P23827 | VLFAAFATTSAWAAESVQPL  | Negative |
| P23827 | AVLFAAFATTSAWAAESVQP  | Negative |
| P23827 | SVQPLEKIAPYPQAEKGMKR  | Negative |
| P23827 | KTILPAVLFAAFATTSAWAA  | Negative |
| P23827 | TTSAWAAESVQPLEKIAPYP  | Negative |
| P23827 | AWAAESVQPLEKIAPYPQAE  | Negative |
| P23843 | AGNVALAADVPAGVTLAEKQ  | Negative |
| P23843 | AADVPAAGVTLAEKQTLVRNN | Negative |
| P23843 | VLAALMAGNVALAADVPAGV  | Negative |
| P23843 | TKRSLVAAGVLAALMAGNVA  | Negative |
| P23843 | RSLVAAGVLAALMAGNVALA  | Negative |
| P23843 | GVLAALMAGNVALAADVPAG  | Negative |
| P23843 | LMAGNVALAADVPAGVTLAE  | Negative |
| P23843 | PAGVTLAEKQTLVRNNGSEV  | Negative |
| P23843 | ITKRSLVAAGVLAALMAGNV  | Negative |
| P23843 | LVAAGVLAALMAGNVALAAD  | Negative |
| P23843 | VALAADVPAGVTLAEKQTLV  | Negative |
| P23843 | ADVPAAGVTLAEKQTLVRNNG | Negative |
| P23843 | DVPAGVTLAEKQTLVRNNGS  | Negative |
| P23843 | NVALAADVPAGVTLAEKQTL  | Negative |
| P23843 | MTNITKRSLVAAGVLAALMA  | Negative |
| P23843 | VAAGVLAALMAGNVALAADV  | Negative |
| P23843 | MAGNVALAADVPAGVTLAEK  | Negative |
| P23843 | VPAGVTLAEKQTLVRNNGSE  | Negative |
| P23843 | SLVAAGVLAALMAGNVALAA  | Negative |
| P23843 | LAADVPAAGVTLAEKQTLVRN | Negative |
| P23843 | GVALAADVPAGVTLAEKQT   | Negative |
| P23843 | KRSLVAAGVLAALMAGNVAL  | Negative |
| P23843 | TNITKRSLVAAGVLAALMAG  | Negative |
| P23843 | ALMAGNVALAADVPAGVTLA  | Negative |
| P23843 | AALMAGNVALAADVPAGVTL  | Negative |
| P23843 | NITKRSLVAAGVLAALMAGN  | Negative |

|        |                       |          |
|--------|-----------------------|----------|
| P23843 | LAALMAGNVALAADVPAGVT  | Negative |
| P23843 | ALAADVPAAGVTLAEKQTLVR | Negative |
| P23843 | AAGVLAALMAGNVALAADVP  | Negative |
| P23847 | KTLVYCSEGSPGEGFNPQLFT | Negative |
| P23847 | TLVYCSEGSPGEGFNPQLFTS | Negative |
| P23847 | MTVAASVQAKTLVYCSEGSP  | Negative |
| P23847 | SVQAKTLVYCSEGSPGEGFNP | Negative |
| P23847 | VAASVQAKTLVYCSEGSPGEG | Negative |
| P23847 | KSGMLKLGLSLVAMTVAASV  | Negative |
| P23847 | SLKKSGMLKLGLSLVAMTVA  | Negative |
| P23847 | ISLKKSGMLKLGLSLVAMTV  | Negative |
| P23847 | VQAKTLVYCSEGSPGEGFNPQ | Negative |
| P23847 | MLKLGLSLVAMTVAASVQAK  | Negative |
| P23847 | RISLKKSGMLKLGLSLVAMT  | Negative |
| P23847 | KKSGMLKLGLSLVAMTVAAS  | Negative |
| P23847 | SGMLKLGLSLVAMTVAASVQ  | Negative |
| P23847 | LGLSLVAMTVAASVQAKTLV  | Negative |
| P23847 | LVAMTVAASVQAKTLVYCSE  | Negative |
| P23847 | TVAASVQAKTLVYCSEGSPG  | Negative |
| P23847 | AMTVAASVQAKTLVYCSEG   | Negative |
| P23847 | SLVAMTVAASVQAKTLVYCS  | Negative |
| P23847 | ASVQAKTLVYCSEGSPGEGF  | Negative |
| P23847 | LKLGLSLVAMTVAASVQAKT  | Negative |
| P23847 | KLGLSLVAMTVAASVQAKTL  | Negative |
| P23847 | QAKTLVYCSEGSPGEGFNPQL | Negative |
| P23847 | MRISLKKSGMLKLGLSLVAM  | Negative |
| P23847 | LSLVAMTVAASVQAKTLVYC  | Negative |
| P23847 | GMLKLGLSLVAMTVAASVQA  | Negative |
| P23847 | AASVQAKTLVYCSEGSPGEG  | Negative |
| P23847 | VAMTVAASVQAKTLVYCSEG  | Negative |
| P23847 | LKKSGMLKLGLSLVAMTVAA  | Negative |
| P23847 | AKTLVYCSEGSPGEGFNPQLF | Negative |
| P23857 | LALALVFSLPVFAAEHWIDV  | Negative |
| P23857 | FSLPVFAAEHWIDVRVPEQY  | Negative |
| P23857 | EQYQQEHVQGAINIPLKEVK  | Negative |
| P23857 | FAAEHWIDVRVPEQYQQEHV  | Negative |
| P23857 | PEQYQQEHVQGAINIPLKEV  | Negative |
| P23857 | MFKKGLLALALVFSLPVFAA  | Negative |
| P23857 | LLALALVFSLPVFAAEHWID  | Negative |
| P23857 | ALVFSLPVFAAEHWIDVRVP  | Negative |
| P23857 | AAEHWDVRVPEQYQQEHVQ   | Negative |
| P23857 | PVFAAEHWIDVRVPEQYQQE  | Negative |
| P23857 | ALALVFSLPVFAAEHWIDVR  | Negative |
| P23857 | LALVFSLPVFAAEHWIDVRV  | Negative |
| P23857 | FKKGLLALALVFSLPVFAAE  | Negative |
| P23857 | AEHWIDVRVPEQYQQEHVQG  | Negative |

|        |                       |          |
|--------|-----------------------|----------|
| P23857 | LPVFAAEHWIDVRVPEQYQQ  | Negative |
| P23857 | WIDVRVPEYQQEHVQGAIN   | Negative |
| P23857 | HWIDVRVPEYQQEHVQGAI   | Negative |
| P23857 | RVPEYQQEHVQGAINIPLK   | Negative |
| P23857 | VPEYQQEHVQGAINIPLKE   | Negative |
| P23857 | DVRVPEYQQEHVQGAINIP   | Negative |
| P23857 | SLPVFAAEHWIDVRVPEYQ   | Negative |
| P23857 | VFSLPVFAAEHWIDVRVPEQ  | Negative |
| P23857 | KKGLLALALVFSLPVFAAEH  | Negative |
| P23857 | VRVPEYQQEHVQGAINIPL   | Negative |
| P23857 | KGLLALALVFSLPVFAAEHW  | Negative |
| P23857 | LVFSLPVFAAEHWIDVRVPE  | Negative |
| P23857 | EHWIDVRVPEYQQEHVQGA   | Negative |
| P23857 | IDVRVPEYQQEHVQGAINI   | Negative |
| P23857 | VFAAEHWIDVRVPEYQQEH   | Negative |
| P23903 | GLFLVVVMLASVGVLPSTKV  | Negative |
| P23903 | KKVLGLFLVVVMLASVGVLP  | Negative |
| P23903 | VVVMLASVGVLPSTKVQAAG  | Negative |
| P23903 | ASVGVLPSTKVQAAGTTVTS  | Negative |
| P23903 | FMKKVLGLFLVVVMLASVGV  | Negative |
| P23903 | FLVVVMLASVGVLPSTKVQA  | Negative |
| P23903 | VVMLASVGVLPSTKVQAAGT  | Negative |
| P23903 | KRFMKKVLGLFLVVVMLASV  | Negative |
| P23903 | TEKRFMKKVLGLFLVVMLA   | Negative |
| P23903 | EKRFMKKVLGLFLVVVMLAS  | Negative |
| P23903 | SVGVLPSTKVQAAGTTVTSM  | Negative |
| P23903 | MKPSHFTEKRFMKKVLGLFL  | Negative |
| P23903 | PSHFTEKRFMKKVLGLFLVV  | Negative |
| P23903 | KVLGLFLVVVMLASVGVLP   | Negative |
| P23903 | RFMKKVLGLFLVVVMLASVG  | Negative |
| P23903 | HFTEKRFMKKVLGLFLVVVM  | Negative |
| P23903 | VLGLFLVVVMLASVGVLP    | Negative |
| P23903 | VGVLPTSKVQAAGTTVTSME  | Negative |
| P23903 | VLPTSKVQAAGTTVTSMEYF  | Negative |
| P23903 | VMLASVGVLPSTKVQAAGTT  | Negative |
| P23903 | LASVGVLPSTSKVQAAGTTVT | Negative |
| P23903 | KPSHFTEKRFMKKVLGLFLV  | Negative |
| P23903 | GVLPSTSKVQAAGTTVTSMEY | Negative |
| P23903 | SHFTEKRFMKKVLGLFLVVV  | Negative |
| P23903 | LFLVVVMLASVGVLPSTKVQ  | Negative |
| P23903 | LVVVMLASVGVLPSTKVQAA  | Negative |
| P23903 | MKKVLGLFLVVVMLASVGV   | Negative |
| P23903 | FTEKRFMKKVLGLFLVVVML  | Negative |
| P23903 | LGLFLVVVMLASVGVLPSTK  | Negative |
| P23954 | WRKIAMLAAVPLLLASGAL   | Negative |
| P23954 | MLAAVPLLLASGALWASTD   | Negative |



|        |                      |          |
|--------|----------------------|----------|
| P23954 | SSWRKIAMLAAAVPLLLASG | Negative |
| P23954 | MIKSSWRKIAMLAAAVPLLL | Negative |
| P23954 | LWASTDAIHQKLTDLKRS   | Negative |
| P23954 | RKIAMLAAAVPLLLASGALW | Negative |
| P23954 | LLASGALWASTDAIHQKLT  | Negative |
| P23954 | PLLLASGALWASTDAIHQKL | Negative |
| P23954 | AMLAAAVPLLLASGALWAST | Negative |
| P23954 | GALWASTDAIHQKLTDLKR  | Negative |
| P23954 | LAAAVPLLLASGALWASTDA | Negative |
| P23954 | AVPLLLASGALWASTDAIHQ | Negative |
| P23954 | ASTDAIHQKLTDLKRSGGR  | Negative |
| P23954 | LLASGALWASTDAIHQKLT  | Negative |
| P23954 | IKSSWRKIAMLAAAVPLLLA | Negative |
| P23954 | AAVPLLLASGALWASTDAIH | Negative |
| P23954 | IAMLAAAVPLLLASGALWAS | Negative |
| P23954 | KIAMLAAAVPLLLASGALWA | Negative |
| P23954 | LASGALWASTDAIHQKLTDL | Negative |
| P23954 | KSSWRKIAMLAAAVPLLLAS | Negative |
| P23954 | TDIAHQKLTDLKRSGGRLG  | Negative |
| P23954 | WASTDAIHQKLTDLKRSGG  | Negative |
| P23954 | SWRKIAMLAAAVPLLLASGA | Negative |
| P23954 | VPLLLASGALWASTDAIHQK | Negative |
| P23954 | STDAIHQKLTDLKRSGGRL  | Negative |
| P23954 | DAIHQKLTDLKRSGGRLGV  | Negative |
| P23954 | SGALWASTDAIHQKLTDLK  | Negative |
| P23954 | ASGALWASTDAIHQKLTDL  | Negative |
| P23954 | ALWASTDAIHQKLTDLKRS  | Negative |
| P24021 | GWGNLGHETVAYIAQSFVAS | Negative |
| P24021 | LPISAATLALAQLTYGWGNL | Negative |
| P24021 | AATLALAQLTYGWGNLGHET | Negative |
| P24021 | HETVAYIAQSFVASSTESFC | Negative |
| P24021 | WGNLGHETVAYIAQSFVASS | Negative |
| P24021 | AYIAQSFVASSTESFCQNIL | Negative |
| P24021 | TVAYIAQSFVASSTESFCQN | Negative |
| P24021 | QLTYGWGNLGHETVAYIAQS | Negative |
| P24021 | TLALAQLTYGWGNLGHETVA | Negative |
| P24021 | SAATLALAQLTYGWGNLGHE | Negative |
| P24021 | GNLGHETVAYIAQSFVASST | Negative |
| P24021 | ALAQLTYGWGNLGHETVAYI | Negative |
| P24021 | YGWGNLGHETVAYIAQSFVA | Negative |
| P24021 | LTYGWGNLGHETVAYIAQSF | Negative |
| P24021 | ISAATLALAQLTYGWGNLGH | Negative |
| P24021 | PRLLPISAATLALAQLTYGW | Negative |
| P24021 | RLLPISAATLALAQLTYGWG | Negative |
| P24021 | LGHETVAYIAQSFVASSTES | Negative |
| P24021 | MPRLLPISAATLALAQLTYG | Negative |

|        |                      |          |
|--------|----------------------|----------|
| P24021 | LLPISAATLALAQLTYGWGN | Negative |
| P24021 | AQLTYGWGNLGHETVAYIAQ | Negative |
| P24021 | NLGHETVAYIAQSFVASSTE | Negative |
| P24021 | LALAQLTYGWGNLGHETVAY | Negative |
| P24021 | TYGWGNLGHETVAYIAQSFV | Negative |
| P24021 | GHETVAYIAQSFVASSTESF | Negative |
| P24021 | VAYIAQSFVASSTESFCQNI | Negative |
| P24021 | LAQLTYGWGNLGHETVAYIA | Negative |
| P24021 | ETVAYIAQSFVASSTESFCQ | Negative |
| P24021 | ATLALAQLTYGWGNLGHETV | Negative |
| P24027 | LLQFNKMIKFETRKNAPFY  | Negative |
| P24027 | LQFNKMIKFETRKNAPFYA  | Negative |
| P24027 | VEGSLLQFNKMIKFETRKNA | Negative |
| P24027 | RKNAPFYAFYGCYCGWGGQ  | Negative |
| P24027 | KMIKFETRKNAPFYAFYGC  | Negative |
| P24027 | LWIVAVLLVGVEGSLLQFNK | Negative |
| P24027 | IKFETRKNAPFYAFYGCYC  | Negative |
| P24027 | TRKNAPFYAFYGCYCGWGG  | Negative |
| P24027 | ALWIVAVLLVGVEGSLLQFN | Negative |
| P24027 | FNKMIKFETRKNAPFYAFY  | Negative |
| P24027 | AVLLVGVEGSLLQFNKMIKF | Negative |
| P24027 | GVEGSLLQFNKMIKFETRKN | Negative |
| P24027 | MRALWIVAVLLVGVEGSLLQ | Negative |
| P24027 | VAVLLVGVEGSLLQFNKMIK | Negative |
| P24027 | VLLVGVEGSLLQFNKMIKFE | Negative |
| P24027 | NKMIKFETRKNAPFYAFYG  | Negative |
| P24027 | GSLQFNKMIKFETRKNAPV  | Negative |
| P24027 | ETRKNAPFYAFYGCYCGWG  | Negative |
| P24027 | WIVAVLLVGVEGSLLQFNKM | Negative |
| P24027 | VGVEGSLLQFNKMIKFETRK | Negative |
| P24027 | LLVGVEGSLLQFNKMIKFET | Negative |
| P24027 | KFETRKNAPFYAFYGCYCG  | Negative |
| P24027 | LVGVEGSLLQFNKMIKFETR | Negative |
| P24027 | SLLQFNKMIKFETRKNAPV  | Negative |
| P24027 | MIKFETRKNAPFYAFYGCY  | Negative |
| P24027 | IVAVLLVGVEGSLLQFNKMI | Negative |
| P24027 | FETRKNAPFYAFYGCYCGW  | Negative |
| P24027 | QFNKMIKFETRKNAPFYAF  | Negative |
| P24027 | EGSLLQFNKMIKFETRKNAP | Negative |
| P24037 | MKKTLMASAVGAVIAFGTHG | Negative |
| P24037 | SAVGAVIAFGTHGAMAAAPA | Negative |
| P24037 | ASAVGAVIAFGTHGAMAAAP | Negative |
| P24037 | AFGTHGAMAAAPADWSSVAA | Negative |
| P24037 | AMAAAPADWSSVAATDVTLF | Negative |
| P24037 | GTHGAMAAAPADWSSVAATD | Negative |
| P24037 | IAFGTHGAMAAAPADWSSVA | Negative |

|        |                       |          |
|--------|-----------------------|----------|
| P24037 | VIAFGTHGAMAAAPADWSSV  | Negative |
| P24037 | GAVIAFGTHGAMAAAPADWS  | Negative |
| P24037 | VGAVIAFGTHGAMAAAPADW  | Negative |
| P24037 | ADWSSVAATDVTFLFYPGVSP | Negative |
| P24037 | KKTLMASAVGAVIAFGTHGA  | Negative |
| P24037 | APADWSSVAATDVTFLFYPGV | Negative |
| P24037 | MASAVGAVIAFGTHGAMAAA  | Negative |
| P24037 | LMASAVGAVIAFGTHGAMAA  | Negative |
| P24037 | HGAMAAAPADWSSVAATDVT  | Negative |
| P24037 | WSSVAATDVTFLFYPGVSPVE | Negative |
| P24037 | THGAMAAAPADWSSVAATDV  | Negative |
| P24037 | GAMAAAPADWSSVAATDVTL  | Negative |
| P24037 | AVIAFGTHGAMAAAPADWSS  | Negative |
| P24037 | AAAPADWSSVAATDVTFLFY  | Negative |
| P24037 | DWSSVAATDVTFLFYPGVSPV | Negative |
| P24037 | AAPADWSSVAATDVTFLFYPG | Negative |
| P24037 | MAAAPADWSSVAATDVTFLFY | Negative |
| P24037 | SSVAATDVTFLFYPGVSPVEW | Negative |
| P24037 | PADWSSVAATDVTFLFYPGVS | Negative |
| P24037 | FGTHGAMAAAPADWSSVAAT  | Negative |
| P24037 | KTLMASAVGAVIAFGTHGAM  | Negative |
| P24037 | TLMASAVGAVIAFGTHGAMA  | Negative |
| P24052 | KAKKEKMKKEGSECQDWHWG  | Negative |
| P24052 | AAAEAAKAKKEKMKKEGSEC  | Negative |
| P24052 | MQPRGLLLLLLALLLLAAAAE | Negative |
| P24052 | LLALLLLAAAAEAAKAKKEK  | Negative |
| P24052 | EKMKEGSECQDWHWGPCIP   | Negative |
| P24052 | LAAAAEAAKAKKEKMKKEGS  | Negative |
| P24052 | AEAAKAKKEKMKKEGSECQD  | Negative |
| P24052 | LALLLLAAAAEAAKAKKEKM  | Negative |
| P24052 | MKKEGSECQDWHWGPCIPNS  | Negative |
| P24052 | KEKMKKEGSECQDWHWGPCI  | Negative |
| P24052 | LLLLLALLLLAAAAEAAKAK  | Negative |
| P24052 | AAEAAKAKKEKMKKEGSECQ  | Negative |
| P24052 | GLLLLLLALLLLAAAAEAAKA | Negative |
| P24052 | AAAAEAAKAKKEKMKKEGSE  | Negative |
| P24052 | AAKAKKEKMKKEGSECQDWH  | Negative |
| P24052 | EAAKAKKEKMKKEGSECQDW  | Negative |
| P24052 | LLLALLLLAAAAEAAKAKKE  | Negative |
| P24052 | KMKKEGSECQDWHWGPCIPN  | Negative |
| P24052 | KKEKMKKEGSECQDWHWGPC  | Negative |
| P24052 | QPRGLLLLLLALLLLAAAAEA | Negative |
| P24052 | ALLLLAAAAEAAKAKKEKMK  | Negative |
| P24052 | LLAAAAEAAKAKKEKMKKEG  | Negative |
| P24052 | RGLLLLLLALLLLAAAAEAAK | Negative |
| P24052 | KKEGSECQDWHWGPCIPNSK  | Negative |

|        |                       |          |
|--------|-----------------------|----------|
| P24052 | LLLLAAAAEAAKAKKEKMKK  | Negative |
| P24052 | AKAKKEKMKKEGSECQDWHW  | Negative |
| P24052 | PRGLLLLLLALLLAAAAEAA  | Negative |
| P24052 | LLLLAAAAEAAKAKKEKMKKE | Negative |
| P24052 | AKKEKMKKEGSECQDWHWGP  | Negative |
| P24059 | HLRGICLVLAVASSSSSALA  | Negative |
| P24059 | RGICLVLAVASSSSSALAAD  | Negative |
| P24059 | GICLVLAVASSSSSALAADA  | Negative |
| P24059 | SSSSALAADAGHGADLAKRW  | Negative |
| P24059 | DAGHGADLAKRWCASCHVVA  | Negative |
| P24059 | ICLVLAVASSSSSALAADAG  | Negative |
| P24059 | SALAADAGHGADLAKRWCAS  | Negative |
| P24059 | AADAGHGADLAKRWCASCHV  | Negative |
| P24059 | ADAGHGADLAKRWCASCHVV  | Negative |
| P24059 | GADLAKRWCASCHVVANGQA  | Negative |
| P24059 | LAADAGHGADLAKRWCASCH  | Negative |
| P24059 | SSSSSALAADAGHGADLAKR  | Negative |
| P24059 | HGADLAKRWCASCHVVANGQ  | Negative |
| P24059 | SSSALAADAGHGADLAKRWC  | Negative |
| P24059 | ADLAKRWCASCHVVANGQAV  | Negative |
| P24059 | LRGICLVLAVASSSSSALAA  | Negative |
| P24059 | ASSSSSALAADAGHGADLAK  | Negative |
| P24059 | SSALAADAGHGADLAKRWCA  | Negative |
| P24059 | LAVASSSSSALAADAGHGAD  | Negative |
| P24059 | GHGADLAKRWCASCHVVANG  | Negative |
| P24059 | VLAVASSSSSALAADAGHGA  | Negative |
| P24059 | VASSSSSALAADAGHGADLA  | Negative |
| P24059 | MHLHLRGICLVLAVASSSSS  | Negative |
| P24059 | LHLRGICLVLAVASSSSSAL  | Negative |
| P24059 | AGHGADLAKRWCASCHVVAN  | Negative |
| P24059 | HLHLRGICLVLAVASSSSSA  | Negative |
| P24059 | AVASSSSSALAADAGHGADL  | Negative |
| P24059 | LVLAVASSSSSALAADAGHG  | Negative |
| P24059 | ALAADAGHGADLAKRWCASC  | Negative |
| P24090 | SLVLLLCFAQLWSCQSAPQG  | Negative |
| P24090 | QLWSCQSAPQGAGLGFRELA  | Negative |
| P24090 | RELACDDPETEHVALIAVDY  | Negative |
| P24090 | CQSAPQGAGLGFRELACDDP  | Negative |
| P24090 | GAGLGFRELACDDPETEHVA  | Negative |
| P24090 | LLLCFAQLWSCQSAPQGAGL  | Negative |
| P24090 | AQLWSCQSAPQGAGLGFREL  | Negative |
| P24090 | LLCFAQLWSCQSAPQGAGLG  | Negative |
| P24090 | SCQSAPQGAGLGFRELACDD  | Negative |
| P24090 | CFAQLWSCQSAPQGAGLGFR  | Negative |
| P24090 | LACDDPETEHVALIAVDYLN  | Negative |
| P24090 | QGAGLGFRELACDDPETEHV  | Negative |

|        |                      |          |
|--------|----------------------|----------|
| P24090 | KSLVLLLCFAQLWSCQSAPQ | Negative |
| P24090 | GLGFRELACDDPETEHVALI | Negative |
| P24090 | QSAPQGAGLGFRELACDDPE | Negative |
| P24090 | GFRELACDDPETEHVALIAV | Negative |
| P24090 | LGFRELACDDPETEHVALIA | Negative |
| P24090 | ELACDDPETEHVALIAVDYL | Negative |
| P24090 | FAQLWSCQSAPQGAGLGFRE | Negative |
| P24090 | VLLLCFAQLWSCQSAPQGAG | Negative |
| P24090 | PQGAGLGFRELACDDPETEH | Negative |
| P24090 | SAPQGAGLGFRELACDDPET | Negative |
| P24090 | FRELACDDPETEHVALIAVD | Negative |
| P24090 | MKSLVLLLCFAQLWSCQSAP | Negative |
| P24090 | APQGAGLGFRELACDDPETE | Negative |
| P24090 | WSCQSAPQGAGLGFRELACD | Negative |
| P24090 | AGLGFRELACDDPETEHVAL | Negative |
| P24090 | LCFAQLWSCQSAPQGAGLGF | Negative |
| P24090 | LWSCQSAPQGAGLGFRELAC | Negative |
| P24091 | AGGARCASGLCCSKFGWCGN | Negative |
| P24091 | SSLFSLLLLSASAEQCGSQ  | Negative |
| P24091 | EFTALSSLFSLLLLSASAE  | Negative |
| P24091 | LFSLLLSASAEQCGSQAGG  | Negative |
| P24091 | SASAEQCGSQAGGARCASGL | Negative |
| P24091 | LSASAEQCGSQAGGARCASG | Negative |
| P24091 | FSLLLLSASAEQCGSQAGGA | Negative |
| P24091 | LLLSASAEQCGSQAGGARC  | Negative |
| P24091 | ASAEQCGSQAGGARCASGLC | Negative |
| P24091 | ALSSLFSLLLLSASAEQCG  | Negative |
| P24091 | GSQAGGARCASGLCCSKFGW | Negative |
| P24091 | CGSQAGGARCASGLCCSKFG | Negative |
| P24091 | LLLSASAEQCGSQAGGARCA | Negative |
| P24091 | QCGSQAGGARCASGLCCSKF | Negative |
| P24091 | REFTALSSLFSLLLLSASA  | Negative |
| P24091 | SQAGGARCASGLCCSKFGWC | Negative |
| P24091 | AEQCGSQAGGARCASGLCCS | Negative |
| P24091 | EQCGSQAGGARCASGLCCSK | Negative |
| P24091 | RLREFTALSSLFSLLLLSA  | Negative |
| P24091 | FTALSSLFSLLLLSASAEQ  | Negative |
| P24091 | SLLLSASAEQCGSQAGGAR  | Negative |
| P24091 | LLFSLLLLSASAEQCGSQAG | Negative |
| P24091 | LLSASAEQCGSQAGGARCAS | Negative |
| P24091 | QAGGARCASGLCCSKFGWCG | Negative |
| P24091 | TALSSLFSLLLLSASAEQC  | Negative |
| P24091 | SAEQCGSQAGGARCASGLCC | Negative |
| P24091 | LREFTALSSLFSLLLLSAS  | Negative |
| P24091 | MRLREFTALSSLFSLLLLS  | Negative |
| P24091 | SLLFSLLLLSASAEQCGSQA | Negative |

|        |                      |          |
|--------|----------------------|----------|
| P24093 | VFAVSSAHAGFTPSGTTGTT | Negative |
| P24093 | FTPSGTTGTTKLTVTEECQV | Negative |
| P24093 | FAVSSAHAGFTPSGTTGTTK | Negative |
| P24093 | MKKLAIMAAASMVFAVSSAH | Negative |
| P24093 | HAGFTPSGTTGTTKLTVTEE | Negative |
| P24093 | SSAHAGFTPSGTTGTTKLTV | Negative |
| P24093 | TTGTTKLTVTEECQVRVGD  | Negative |
| P24093 | ASMVFAVSSAHAGFTPSGTT | Negative |
| P24093 | MVFAVSSAHAGFTPSGTTGT | Negative |
| P24093 | KKLAIMAAASMVFAVSSAHA | Negative |
| P24093 | KLAIMAAASMVFAVSSAHAG | Negative |
| P24093 | GTTGTTKLTVTEECQVRVGD | Negative |
| P24093 | SAHAGFTPSGTTGTTKLTVT | Negative |
| P24093 | SMVFAVSSAHAGFTPSGTTG | Negative |
| P24093 | VSSAHAGFTPSGTTGTTKLT | Negative |
| P24093 | AAASMVFAVSSAHAGFTPSG | Negative |
| P24093 | AGFTPSGTTGTTKLTVTEEC | Negative |
| P24093 | AVSSAHAGFTPSGTTGTTKL | Negative |
| P24093 | IMAAASMVFAVSSAHAGFTP | Negative |
| P24093 | AIMAAASMVFAVSSAHAGFT | Negative |
| P24093 | PSGTTGTTKLTVTEECQVRV | Negative |
| P24093 | GFTPSGTTGTTKLTVTEECQ | Negative |
| P24093 | LAIMAAASMVFAVSSAHAGF | Negative |
| P24093 | GTTKLTVTEECQVRVGD    | Negative |
| P24093 | TGTTKLTVTEECQVRVGD   | Negative |
| P24093 | AASMVFAVSSAHAGFTPSGT | Negative |
| P24093 | SGTTGTTKLTVTEECQVRVG | Negative |
| P24093 | AHAGFTPSGTTGTTKLTVTE | Negative |
| P24093 | TPSGTTGTTKLTVTEECQVR | Negative |
| P24121 | MKNKLLFKIFLSLSLALSVY | Negative |
| P24121 | NKLLFKIFLSLSLALSVYSI | Negative |
| P24121 | VSNTSLAADVKNFTDLDEAT | Negative |
| P24121 | EVSNTSLAADVKNFTDLDEA | Negative |
| P24121 | IIEVSNTSLAADVKNFTDL  | Negative |
| P24121 | IFLSLSLALSVYSINDKII  | Negative |
| P24121 | FKIFLSLSLALSVYSINDKI | Negative |
| P24121 | SVYSINDKIIVSNTSLAAD  | Negative |
| P24121 | SLALSVYSINDKIIVSNTS  | Negative |
| P24121 | KLLFKIFLSLSLALSVYSIN | Negative |
| P24121 | LSVYSINDKIIVSNTSLAA  | Negative |
| P24121 | SNTSLAADVKNFTDLDEATK | Negative |
| P24121 | YSINDKIIVSNTSLAADVK  | Negative |
| P24121 | IEVSNTSLAADVKNFTDLDE | Negative |
| P24121 | ALSVYSINDKIIVSNTSLA  | Negative |
| P24121 | LFKIFLSLSLALSVYSINDK | Negative |
| P24121 | NDKIIVSNTSLAADVKNFT  | Negative |

|        |                      |          |
|--------|----------------------|----------|
| P24121 | INDKIEVSNTSLAADVKNF  | Negative |
| P24121 | KIEVSNTSLAADVKNFTDL  | Negative |
| P24121 | LSLALSVYSINDKIEVSNT  | Negative |
| P24121 | DKIEVSNTSLAADVKNFTD  | Negative |
| P24121 | LALSVYSINDKIEVSNTSL  | Negative |
| P24121 | LLFKIFLSLSLALSVYSIND | Negative |
| P24121 | FLSLSLALSVYSINDKIEV  | Negative |
| P24121 | SLSLALSVYSINDKIEVSN  | Negative |
| P24121 | VYSINDKIEVSNTSLAADV  | Negative |
| P24121 | LSLSLALSVYSINDKIEVS  | Negative |
| P24121 | KNKLLFKIFLSLSLALSVYS | Negative |
| P24121 | KIFLSLSLALSVYSINDKII | Negative |
| P24228 | RFIIGLTSCIAFSVQAANVD | Negative |
| P24228 | ITQLPAGANLALMVQKVGAS | Negative |
| P24228 | RFSRFIIGLTSCIAFSVQAA | Negative |
| P24228 | SVQAANVDEYITQLPAGANL | Negative |
| P24228 | AFSVQAANVDEYITQLPAGA | Negative |
| P24228 | TQLPAGANLALMVQKVGASA | Negative |
| P24228 | QLPAGANLALMVQKVGASAP | Negative |
| P24228 | DEYITQLPAGANLALMVQKV | Negative |
| P24228 | IIGLTSCIAFSVQAANVDEY | Negative |
| P24228 | IGLTSCIAFSVQAANVDEYI | Negative |
| P24228 | CIAFSVQAANVDEYITQLPA | Negative |
| P24228 | SCIAFSVQAANVDEYITQLP | Negative |
| P24228 | MRFSRFIIGLTSCIAFSVQA | Negative |
| P24228 | LTSCIAFSVQAANVDEYITQ | Negative |
| P24228 | GLTSCIAFSVQAANVDEYIT | Negative |
| P24228 | ANVDEYITQLPAGANLALMV | Negative |
| P24228 | NVDEYITQLPAGANLALMVQ | Negative |
| P24228 | FSVQAANVDEYITQLPAGAN | Negative |
| P24228 | QAANVDEYITQLPAGANLAL | Negative |
| P24228 | AANVDEYITQLPAGANLALM | Negative |
| P24228 | IAFSVQAANVDEYITQLPAG | Negative |
| P24228 | SRFIIGLTSCIAFSVQAANV | Negative |
| P24228 | TSCIAFSVQAANVDEYITQL | Negative |
| P24228 | YITQLPAGANLALMVQKVGA | Negative |
| P24228 | EYITQLPAGANLALMVQKVG | Negative |
| P24228 | LPAGANLALMVQKVGASAPA | Negative |
| P24228 | VDEYITQLPAGANLALMVQK | Negative |
| P24228 | FSRFIIGLTSCIAFSVQAAN | Negative |
| P24228 | VQAANVDEYITQLPAGANLA | Negative |
| P24258 | YKFGTSPDSKATHTGDHWDH | Negative |
| P24258 | LAALALAGCAQACIYKFGTS | Negative |
| P24258 | CIYKFGTSPDSKATHTGDHW | Negative |
| P24258 | TGALLLAALALAGCAQACIY | Negative |
| P24258 | LALAGCAQACIYKFGTSPDS | Negative |

|        |                      |          |
|--------|----------------------|----------|
| P24258 | ARTGALLLAALALAGCAQAC | Negative |
| P24258 | ALAGCAQACIYKFGTSPDSK | Negative |
| P24258 | IYKFGTSPDSKATHTGDHWD | Negative |
| P24258 | KFGTSPDSKATHTGDHWDHS | Negative |
| P24258 | ALALAGCAQACIYKFGTSPD | Negative |
| P24258 | QACIYKFGTSPDSKATHTGD | Negative |
| P24258 | TSPDSKATHTGDHWDHSLNG | Negative |
| P24258 | AGCAQACIYKFGTSPDSKAT | Negative |
| P24258 | AALALAGCAQACIYKFGTSP | Negative |
| P24258 | FGTSPDSKATHTGDHWDHSL | Negative |
| P24258 | GCAQACIYKFGTSPDSKATH | Negative |
| P24258 | CAQACIYKFGTSPDSKATHT | Negative |
| P24258 | RTGALLLAALALAGCAQACI | Negative |
| P24258 | LAGCAQACIYKFGTSPDSKA | Negative |
| P24258 | LLLAALALAGCAQACIYKFG | Negative |
| P24258 | MARTGALLLAALALAGCAQA | Negative |
| P24258 | GTSPDSKATHTGDHWDHSLN | Negative |
| P24258 | DSKATHTGDHWDHSLNGENW | Negative |
| P24258 | LLAALALAGCAQACIYKFGT | Negative |
| P24258 | PDSKATHTGDHWDHSLNGEN | Negative |
| P24258 | ACIYKFGTSPDSKATHTGDH | Negative |
| P24258 | GALLLAALALAGCAQACIYK | Negative |
| P24258 | AQACIYKFGTSPDSKATHTG | Negative |
| P24258 | SPDSKATHTGDHWDHSLNGE | Negative |
| P24259 | ITVSFLLVLVFQFPGQTRAN | Negative |
| P24259 | GQTRANPVYGSVSADLMDF  | Negative |
| P24259 | VYGSVSADLMDFKNLLDHL  | Negative |
| P24259 | VLVFQFPGQTRANPVYGSVS | Negative |
| P24259 | TVSFLLVLVFQFPGQTRANP | Negative |
| P24259 | FPGQTRANPVYGSVSADLM  | Negative |
| P24259 | VSFLLVLVFQFPGQTRANPV | Negative |
| P24259 | NPVYGSVSADLMDFKNLLD  | Negative |
| P24259 | GSVSADLMDFKNLLDHLED  | Negative |
| P24259 | TRANPVYGSVSADLMDFKN  | Negative |
| P24259 | PVYGSVSADLMDFKNLLDH  | Negative |
| P24259 | ANPVYGSVSADLMDFKNLL  | Negative |
| P24259 | YGSVSADLMDFKNLLDHLE  | Negative |
| P24259 | LVFQFPGQTRANPVYGSVS  | Negative |
| P24259 | LVLVFQFPGQTRANPVYGSV | Negative |
| P24259 | SFLLVLVFQFPGQTRANPVY | Negative |
| P24259 | PGQTRANPVYGSVSADLMD  | Negative |
| P24259 | SVSNADLMDFKNLLDHLEDK | Negative |
| P24259 | QFPGQTRANPVYGSVSADL  | Negative |
| P24259 | SSFTITVSFLLVLVFQFPGQ | Negative |
| P24259 | FQFPGQTRANPVYGSVSAD  | Negative |
| P24259 | MSSFTITVSFLLVLVFQFPG | Negative |



|        |                       |          |
|--------|-----------------------|----------|
| P24259 | LLVLVFQFPGQTRANPVYGS  | Negative |
| P24259 | VFQFPGQTRANPVYGSVSNA  | Negative |
| P24259 | FTITVSFLLVLVFQFPGQTR  | Negative |
| P24259 | TITVSFLLVLVFQFPGQTRA  | Negative |
| P24259 | SFTITVSFLLVLVFQFPGQT  | Negative |
| P24259 | RANPVYGSVSNAIDLMDFKNL | Negative |
| P24259 | QTRANPVYGSVSNAIDLMDFK | Negative |
| P24296 | AVALVLMMLAAVPRAAVIDC  | Negative |
| P24296 | DCGHVDSLVRPCLSYVQGGP  | Negative |
| P24296 | AVPRAAVIDCGHVDSLVRP   | Negative |
| P24296 | CGHVDSLVRPCLSYVQGGPG  | Negative |
| P24296 | AAVPRAAVIDCGHVDSLVR   | Negative |
| P24296 | ALVLMMLAAVPRAAVIDCGH  | Negative |
| P24296 | VALVLMMLAAVPRAAVIDCG  | Negative |
| P24296 | PRAAVIDCGHVDSLVRPCL   | Negative |
| P24296 | VAIDCGHVDSLVRPCLSYVQ  | Negative |
| P24296 | DSLVRPCLSYVQGGPGPSGQ  | Negative |
| P24296 | AIDCGHVDSLVRPCLSYVQG  | Negative |
| P24296 | GHVDSLVRPCLSYVQGGPGP  | Negative |
| P24296 | LAAVPRAAVIDCGHVDSL    | Negative |
| P24296 | VMLMAVALVLMMLAAVPRAAV | Negative |
| P24296 | MAVALVLMMLAAVPRAAVID  | Negative |
| P24296 | AAVIDCGHVDSLVRPCLSYV  | Negative |
| P24296 | LMAVALVLMMLAAVPRAAVAI | Negative |
| P24296 | LMLAAVPRAAVIDCGHVDS   | Negative |
| P24296 | VLMLAAVPRAAVIDCGHVD   | Negative |
| P24296 | IDCGHVDSLVRPCLSYVQGG  | Negative |
| P24296 | VPRAAVIDCGHVDSLVRPC   | Negative |
| P24296 | RAAVIDCGHVDSLVRPCLS   | Negative |
| P24296 | HVDSLVRPCLSYVQGGPGPS  | Negative |
| P24296 | MLMAVALVLMMLAAVPRAAVA | Negative |
| P24296 | AQVMLMAVALVLMMLAAVPRA | Negative |
| P24296 | QVMLMAVALVLMMLAAVPRAA | Negative |
| P24296 | MLAAVPRAAVIDCGHVDSL   | Negative |
| P24296 | AAVIDCGHVDSLVRPCLSY   | Negative |
| P24296 | VDSLVRPCLSYVQGGPGPSG  | Negative |
| P24336 | CLVNADGYIRKKDGCKVSCI  | Negative |
| P24336 | VISASMLLECLVNADGYIRK  | Negative |
| P24336 | YIRKKDGCKVSCIIGNEGCR  | Negative |
| P24336 | RKKDGCKVSCIIGNEGCRKE  | Negative |
| P24336 | ECLVNADGYIRKKDGCKVSC  | Negative |
| P24336 | GCKVSCIIGNEGCRKECVAH  | Negative |
| P24336 | KDGCKVSCIIGNEGCRKECV  | Negative |
| P24336 | LLLVISASMLLECLVNADGY  | Negative |
| P24336 | SMLLECLVNADGYIRKKDGC  | Negative |
| P24336 | NADGYIRKKDGCKVSCIIGN  | Negative |

|        |                      |          |
|--------|----------------------|----------|
| P24336 | LLECLVNADGYIRKKDGCKV | Negative |
| P24336 | ISASMLLECLVNADGYIRKK | Negative |
| P24336 | DGYIRKKDGCKVSCIIGNEG | Negative |
| P24336 | VNADGYIRKKDGCKVSCIIG | Negative |
| P24336 | KKDGCKVSCIIGNEGCRKEC | Negative |
| P24336 | LVNADGYIRKKDGCKVSCII | Negative |
| P24336 | SASMLLECLVNADGYIRKKD | Negative |
| P24336 | LLLLLVISASMLLECLVNAD | Negative |
| P24336 | LLVISASMLLECLVNADGYI | Negative |
| P24336 | ASMLLECLVNADGYIRKKDG | Negative |
| P24336 | MLLECLVNADGYIRKKDGCK | Negative |
| P24336 | IRKKDGCKVSCIIGNEGCRK | Negative |
| P24336 | GYIRKKDGCKVSCIIGNEGC | Negative |
| P24336 | MKLLLLLVISASMLLECLVN | Negative |
| P24336 | KLLLLLVISASMLLECLVNA | Negative |
| P24336 | LECLVNADGYIRKKDGCKVS | Negative |
| P24336 | LLLVISASMLLECLVNADG  | Negative |
| P24336 | DGCKVSCIIGNEGCRKECVA | Negative |
| P24336 | ADGYIRKKDGCKVSCIIGNE | Negative |
| P24474 | AHAKDDMKAAEQYQGAASAV | Negative |
| P24474 | SLTLLGLATAHAKDDMKAAE | Negative |
| P24474 | TLLGLATAHAKDDMKAAEQY | Negative |
| P24474 | LASLTLLGLATAHAKDDMKA | Negative |
| P24474 | LLGLATAHAKDDMKAAEQYQ | Negative |
| P24474 | PFGKPLVGTLLASLTLLGLA | Negative |
| P24474 | TAHAKDDMKAAEQYQGAASA | Negative |
| P24474 | DMKAAEQYQGAASAVDPAHV | Negative |
| P24474 | ASLTLLGLATAHAKDDMKAA | Negative |
| P24474 | PLVGTLLASLTLLGLATAHA | Negative |
| P24474 | KPLVGTLLASLTLLGLATAH | Negative |
| P24474 | GKPLVGTLLASLTLLGLATA | Negative |
| P24474 | MKAAEQYQGAASAVDPAHVV | Negative |
| P24474 | KAAEQYQGAASAVDPAHVVR | Negative |
| P24474 | VGTLLASLTLLGLATAHAKD | Negative |
| P24474 | LGLATAHAKDDMKAAEQYQG | Negative |
| P24474 | GTLLASLTLLGLATAHAKDD | Negative |
| P24474 | LVGTLLASLTLLGLATAHAK | Negative |
| P24474 | AKDDMKAAEQYQGAASAVDP | Negative |
| P24474 | HAKDDMKAAEQYQGAASAVD | Negative |
| P24474 | MPFGKPLVGTLLASLTLLGL | Negative |
| P24474 | GLATAHAKDDMKAAEQYQGA | Negative |
| P24474 | DDMKAAEQYQGAASAVDPAH | Negative |
| P24474 | KDDMKAAEQYQGAASAVDPA | Negative |
| P24474 | LATAHAKDDMKAAEQYQGAA | Negative |
| P24474 | LTLLGLATAHAKDDMKAAEQ | Negative |
| P24474 | ATAHAKDDMKAAEQYQGAAS | Negative |

|        |                      |          |
|--------|----------------------|----------|
| P24474 | TLLASLTLLGLATAHAKDDM | Negative |
| P24474 | FGKPLVGTLLASLTLLGLAT | Negative |
| P24476 | MKIYLVAAIAWILFQSSSWT | Negative |
| P24476 | ILFQSSSWTTDAATAYTLNL | Negative |
| P24476 | TTDAATAYTLNLANPSASQY | Negative |
| P24476 | SSSWTTDAATAYTLNLANPS | Negative |
| P24476 | DAATAYTLNLANPSASQYSS | Negative |
| P24476 | NLANPSASQYSSFLDQIRNN | Negative |
| P24476 | KIYLVAAIAWILFQSSSWTT | Negative |
| P24476 | YTLNLANPSASQYSSFLDQI | Negative |
| P24476 | AYTLNLANPSASQYSSFLDQ | Negative |
| P24476 | ATAYTLNLANPSASQYSSFL | Negative |
| P24476 | WILFQSSSWTTDAATAYTLN | Negative |
| P24476 | AATAYTLNLANPSASQYSSF | Negative |
| P24476 | YLVAIAWILFQSSSWTTDA  | Negative |
| P24476 | VAAIAWILFQSSSWTTDAAT | Negative |
| P24476 | TDAATAYTLNLANPSASQYS | Negative |
| P24476 | TLNLANPSASQYSSFLDQIR | Negative |
| P24476 | SWTTDAATAYTLNLANPSAS | Negative |
| P24476 | LVAAIAWILFQSSSWTTDAA | Negative |
| P24476 | SSWTTDAATAYTLNLANPSA | Negative |
| P24476 | AAIAWILFQSSSWTTDAATA | Negative |
| P24476 | LNLANPSASQYSSFLDQIRN | Negative |
| P24476 | IYLVAAIAWILFQSSSWTTD | Negative |
| P24476 | AIAWILFQSSSWTTDAATAY | Negative |
| P24476 | LFQSSSWTTDAATAYTLNLA | Negative |
| P24476 | AWILFQSSSWTTDAATAYTL | Negative |
| P24476 | WTTDAATAYTLNLANPSASQ | Negative |
| P24476 | QSSSWTTDAATAYTLNLANP | Negative |
| P24476 | TAYTLNLANPSASQYSSFLD | Negative |
| P24476 | FQSSSWTTDAATAYTLNLAN | Negative |
| P24478 | TLFLTAPAVEGDVSFRLSGA | Negative |
| P24478 | ILTLFLTAPAVEGDVSFRLS | Negative |
| P24478 | LTAPAVEGDVSFRLSGATSS | Negative |
| P24478 | GDVSFRLSGATSSSYGVFIS | Negative |
| P24478 | EGDVSFRLSGATSSSYGVFI | Negative |
| P24478 | TAPAVEGDVSFRLSGATSSS | Negative |
| P24478 | RFLVFSLLILTLFLTAPAVE | Negative |
| P24478 | VEGDVSFRLSGATSSSYGVF | Negative |
| P24478 | LSGATSSSYGVFISNLRKAL | Negative |
| P24478 | PAVEGDVSFRLSGATSSSYG | Negative |
| P24478 | LLILTLFLTAPAVEGDVSFR | Negative |
| P24478 | DVSFRLSGATSSSYGVFISN | Negative |
| P24478 | SLLILTLFLTAPAVEGDVSF | Negative |
| P24478 | SFRLSGATSSSYGVFISNLR | Negative |
| P24478 | FLTAPAVEGDVSFRLSGATS | Negative |

|        |                      |          |
|--------|----------------------|----------|
| P24478 | MIRFLVFSLLILTLFLTAPA | Negative |
| P24478 | RLSGATSSSYGVFISNLRKA | Negative |
| P24478 | SGATSSSYGVFISNLRKALP | Negative |
| P24478 | LILTLFLTAPAVEGDVSFRL | Negative |
| P24478 | VSFRLSGATSSSYGVFISNL | Negative |
| P24478 | FRLSGATSSSYGVFISNLRK | Negative |
| P24478 | FLVFSLLILTLFLTAPAVEG | Negative |
| P24478 | AVEGDVSFRLSGATSSSYGV | Negative |
| P24478 | LFLTAPAVEGDVSFRLSGAT | Negative |
| P24478 | APAVEGDVSFRLSGATSSSY | Negative |
| P24478 | VFSLLILTLFLTAPAVEGDV | Negative |
| P24478 | LTLFLTAPAVEGDVSFRLSG | Negative |
| P24478 | LVFSLLILTLFLTAPAVEGD | Negative |
| P24478 | IRFLVFSLLILTLFLTAPAV | Negative |
| P24605 | KMILQETGKNPAKSYGAYGC | Negative |
| P24605 | LVGVEGSLFELGKMILQETG | Negative |
| P24605 | VGVEGSLFELGKMILQETGK | Negative |
| P24605 | ELGKMILQETGKNPAKSYGA | Negative |
| P24605 | SLFELGKMILQETGKNPAKS | Negative |
| P24605 | VEGSLFELGKMILQETGKNP | Negative |
| P24605 | LLVGVEGSLFELGKMILQET | Negative |
| P24605 | MILQETGKNPAKSYGAYGCN | Negative |
| P24605 | VLLVGVEGSLFELGKMILQE | Negative |
| P24605 | ILQETGKNPAKSYGAYGCNC | Negative |
| P24605 | MAVLLVGVEGSLFELGKMIL | Negative |
| P24605 | IMAVLLVGVEGSLFELGKMI | Negative |
| P24605 | MRTLWIMAVLLVGVEGSLFE | Negative |
| P24605 | ETGKNPAKSYGAYGCNCGVL | Negative |
| P24605 | GVEGSLFELGKMILQETGKN | Negative |
| P24605 | TGKNPAKSYGAYGCNCGVLG | Negative |
| P24605 | EGSLFELGKMILQETGKNPA | Negative |
| P24605 | GSLFELGKMILQETGKNPAK | Negative |
| P24605 | FELGKMILQETGKNPAKSYG | Negative |
| P24605 | LWIMAVLLVGVEGSLFELGK | Negative |
| P24605 | GKMILQETGKNPAKSYGAYG | Negative |
| P24605 | WIMAVLLVGVEGSLFELGKM | Negative |
| P24605 | LGKMILQETGKNPAKSYGAY | Negative |
| P24605 | LQETGKNPAKSYGAYGCNCG | Negative |
| P24605 | QETGKNPAKSYGAYGCNCGV | Negative |
| P24605 | TLWIMAVLLVGVEGSLFELG | Negative |
| P24605 | GKNPAKSYGAYGCNCGVLGR | Negative |
| P24605 | AVLLVGVEGSLFELGKMILQ | Negative |
| P24605 | LFELGKMILQETGKNPAKSY | Negative |
| P24627 | AAPRKNVRWCTISQPEWFKC | Negative |
| P24627 | APRKNVRWCTISQPEWFKCR | Negative |
| P24627 | TISQPEWFKCRRWQWRMKKL | Negative |

|        |                      |          |
|--------|----------------------|----------|
| P24627 | LCLAAPRKNVRWCTISQPEW | Negative |
| P24627 | LLSLGALGLCLAAPRKNVRW | Negative |
| P24627 | NVRWCTISQPEWFKCRRWQW | Negative |
| P24627 | RWCTISQPEWFKCRRWQWRM | Negative |
| P24627 | LGALGLCLAAPRKNVRWCTI | Negative |
| P24627 | LAAPRKNVRWCTISQPEWFK | Negative |
| P24627 | ALLSLGALGLCLAAPRKNVR | Negative |
| P24627 | KNVRWCTISQPEWFKCRRWQ | Negative |
| P24627 | RKNVRWCTISQPEWFKCRRW | Negative |
| P24627 | PRKNVRWCTISQPEWFKCRR | Negative |
| P24627 | GLCLAAPRKNVRWCTISQPE | Negative |
| P24627 | LGLCLAAPRKNVRWCTISQP | Negative |
| P24627 | ISQPEWFKCRRWQWRMKKLG | Negative |
| P24627 | CTISQPEWFKCRRWQWRMKK | Negative |
| P24627 | WCTISQPEWFKCRRWQWRMK | Negative |
| P24627 | MKLFVPALLSLGALGLCLAA | Negative |
| P24627 | CLAAPRKNVRWCTISQPEWF | Negative |
| P24627 | SLGALGLCLAAPRKNVRWCT | Negative |
| P24627 | ALGLCLAAPRKNVRWCTISQ | Negative |
| P24627 | GALGLCLAAPRKNVRWCTIS | Negative |
| P24627 | KLFVPALLSLGALGLCLAAP | Negative |
| P24627 | LFVPALLSLGALGLCLAAPR | Negative |
| P24627 | PALLSLGALGLCLAAPRKNV | Negative |
| P24627 | LSLGALGLCLAAPRKNVRWC | Negative |
| P24627 | FVPALLSLGALGLCLAAPRK | Negative |
| P24627 | VRWCTISQPEWFKCRRWQWR | Negative |
| P24735 | RDTRFPCLCGIAASTLLFAT | Negative |
| P24735 | GEAPADRLKALVDAAVQPVM | Negative |
| P24735 | FPCLCGIAASTLLFATTPAI | Negative |
| P24735 | LLFATTPAIAGEAPADRLKA | Negative |
| P24735 | TPAIAGEAPADRLKALVDAA | Negative |
| P24735 | PAIAGEAPADRLKALVDAAV | Negative |
| P24735 | PADRLKALVDAAVQPVMKAN | Negative |
| P24735 | GIAASTLLFATTPAIAGEAP | Negative |
| P24735 | CLCGIAASTLLFATTPAIAG | Negative |
| P24735 | LFATTPAIAGEAPADRLKAL | Negative |
| P24735 | APADRLKALVDAAVQPVMKA | Negative |
| P24735 | IAGEAPADRLKALVDAAVQP | Negative |
| P24735 | EAPADRLKALVDAAVQPVMK | Negative |
| P24735 | LCGIAASTLLFATTPAIAGE | Negative |
| P24735 | ATTPAIAGEAPADRLKALVD | Negative |
| P24735 | AIAGEAPADRLKALVDAAVQ | Negative |
| P24735 | AGEAPADRLKALVDAAVQPV | Negative |
| P24735 | AASTLLFATTPAIAGEAPAD | Negative |
| P24735 | TRFPCLCGIAASTLLFATTP | Negative |
| P24735 | CGIAASTLLFATTPAIAGEA | Negative |

|        |                       |          |
|--------|-----------------------|----------|
| P24735 | ASTLLFATTPAIAAGEAPADR | Negative |
| P24735 | RFPCLCGIAASTLLFATTPA  | Negative |
| P24735 | DTRFPCLCGIAASTLLFATT  | Negative |
| P24735 | PCLCGIAASTLLFATTPAIA  | Negative |
| P24735 | STLLFATTPAIAAGEAPADRL | Negative |
| P24735 | TTPAIAAGEAPADRLKALVDA | Negative |
| P24735 | FATTPAIAAGEAPADRLKALV | Negative |
| P24735 | TLLFATTPAIAAGEAPADRLK | Negative |
| P24735 | MRDTRFPCLCGIAASTLLFA  | Negative |
| P24792 | MLQMGKAREPNFLILFFFGL  | Negative |
| P24792 | GISSEGSQIRHYKWEVEYMF  | Negative |
| P24792 | ILFFFGLILAFGISSEGSQI  | Negative |
| P24792 | KAREPNFLILFFFGLILAFG  | Negative |
| P24792 | AFGISSEGSQIRHYKWEVEY  | Negative |
| P24792 | LQMGKAREPNFLILFFFGLI  | Negative |
| P24792 | GLILAFGISSEGSQIRHYKW  | Negative |
| P24792 | AREPNFLILFFFGLILAFGI  | Negative |
| P24792 | MGKAREPNFLILFFFGLILA  | Negative |
| P24792 | QMGKAREPNFLILFFFGLIL  | Negative |
| P24792 | ISSEGSQIRHYKWEVEYMFV  | Negative |
| P24792 | EPNFLILFFFGLILAFGISS  | Negative |
| P24792 | LAFGISSEGSQIRHYKWEVE  | Negative |
| P24792 | GKAREPNFLILFFFGLILAF  | Negative |
| P24792 | FLILFFFGLILAFGISSEGS  | Negative |
| P24792 | LFFFGLILAFGISSEGSQIR  | Negative |
| P24792 | LILAFGISSEGSQIRHYKWE  | Negative |
| P24792 | NFLILFFFGLILAFGISSEG  | Negative |
| P24792 | LILFFFGLILAFGISSEGSQ  | Negative |
| P24792 | REPNFLILFFFGLILAFGIS  | Negative |
| P24792 | FFGLILAFGISSEGSQIRHY  | Negative |
| P24792 | ILAFGISSEGSQIRHYKWEV  | Negative |
| P24792 | FGISSEGSQIRHYKWEVEYM  | Negative |
| P24792 | FGLILAFGISSEGSQIRHYK  | Negative |
| P24792 | EGSQIRHYKWEVEYMFVWAPD | Negative |
| P24792 | PNFLILFFFGLILAFGISSE  | Negative |
| P24792 | GSQIRHYKWEVEYMFVWAPDC | Negative |
| P24792 | SEGSQIRHYKWEVEYMFVWAP | Negative |
| P24792 | SSEGSQIRHYKWEVEYMFVA  | Negative |
| P24802 | NLLVLTVATKQTEGFRRFR   | Negative |
| P24802 | ENLLVLTVATKQTEGFRRFR  | Negative |
| P24802 | LLVLTVATKQTEGFRRFRS   | Negative |
| P24802 | MVPPAVLLPWVVLPLLGVQGG | Negative |
| P24802 | PAVLLPWVVLPLLGVQGGSG  | Negative |
| P24802 | QEENLLVLTVATKQTEGFRR  | Negative |
| P24802 | SKQEENLLVLTVATKQTEGF  | Negative |
| P24802 | LPWVVLPLLGVQGGSGSKQE  | Negative |

|        |                        |          |
|--------|------------------------|----------|
| P24802 | GSQSKQEEENLLVLTVA TKQT | Negative |
| P24802 | SGSKQEEENLLVLTVA TKQTE | Negative |
| P24802 | AVLLPWVVLPLLGVQGGSGS   | Negative |
| P24802 | VPPAVLLPWVVLPLLGVQGG   | Negative |
| P24802 | LGVQGGSGSKQEEENLLVLT   | Negative |
| P24802 | LPLLGVQGGSGSKQEEENLL   | Negative |
| P24802 | EENLLVLTVA TKQTEGFRRF  | Negative |
| P24802 | GVQGGSGSKQEEENLLVLTVA  | Negative |
| P24802 | VQGGSGSKQEEENLLVLTVA   | Negative |
| P24802 | LLGVQGGSGSKQEEENLLVLT  | Negative |
| P24802 | LLPWVVLPLLGVQGGSGSKQ   | Negative |
| P24802 | PPAVLLPWVVLPLLGVQGG    | Negative |
| P24802 | QGGSGSKQEEENLLVLTVA TK | Negative |
| P24802 | KQEEENLLVLTVA TKQTEGFR | Negative |
| P24802 | PLLGVQGGSGSKQEEENLLVL  | Negative |
| P24802 | GSKQEEENLLVLTVA TKQTEG | Negative |
| P24802 | WVVLPLLGVQGGSGSKQEEEN  | Negative |
| P24802 | VLPLLGVQGGSGSKQEEENLL  | Negative |
| P24802 | PWVVLPLLGVQGGSGSKQEE   | Negative |
| P24802 | GGSGSKQEEENLLVLTVA TKQ | Negative |
| P24802 | VVLPLLGVQGGSGSKQEEENL  | Negative |
| P24807 | VARLGLGLLLLALLLPTQIY   | Negative |
| P24807 | SVAPFPGNQNISASPNPSNA   | Negative |
| P24807 | YCNQTSVAPFPGNQNISASP   | Negative |
| P24807 | LGLLLLALLLPTQIYCNQTS   | Negative |
| P24807 | RLGLGLLLLALLLPTQIYCN   | Negative |
| P24807 | QIYCNQTSVAPFPGNQNISAS  | Negative |
| P24807 | LGLGLLLLALLLPTQIYCNQ   | Negative |
| P24807 | LLLALLLPTQIYCNQTSVA    | Negative |
| P24807 | TSVAPFPGNQNISASPNPSN   | Negative |
| P24807 | MVARLGLGLLLLALLLPTQI   | Negative |
| P24807 | PTQIYCNQTSVAPFPGNQNI   | Negative |
| P24807 | GRAMVARLGLGLLLLALLLP   | Negative |
| P24807 | LLLALLLPTQIYCNQTSVAP   | Negative |
| P24807 | IYCNQTSVAPFPGNQNISAS   | Negative |
| P24807 | LALLLPTQIYCNQTSVAPFP   | Negative |
| P24807 | LLPTQIYCNQTSVAPFPGNQ   | Negative |
| P24807 | LLALLLPTQIYCNQTSVAPF   | Negative |
| P24807 | NQTSVAPFPGNQNISASPNP   | Negative |
| P24807 | ALLLPTQIYCNQTSVAPFPG   | Negative |
| P24807 | GLGLLLLALLLPTQIYCNQT   | Negative |
| P24807 | RAMVARLGLGLLLLALLLPT   | Negative |
| P24807 | AMVARLGLGLLLLALLLPTQ   | Negative |
| P24807 | LLLPTQIYCNQTSVAPFPGN   | Negative |
| P24807 | QTSVAPFPGNQNISASPNPS   | Negative |
| P24807 | ARLGLGLLLLALLLPTQIYC   | Negative |

|        |                      |          |
|--------|----------------------|----------|
| P24807 | MGRAMVARLGLGLLLLALLL | Negative |
| P24807 | LPTQIYCNQTSVAPFPGNQN | Negative |
| P24807 | CNQTSVAPFPGNQNISASPN | Negative |
| P24807 | TQIYCNQTSVAPFPGNQNIS | Negative |
| P24817 | LIIAIFIGVPTAKGDVNFDL | Negative |
| P24817 | DVNFDLSTATAKTYTKFIED | Negative |
| P24817 | FIGVPTAKGDVNFDLSTATA | Negative |
| P24817 | IGVPTAKGDVNFDLSTATAK | Negative |
| P24817 | SFLIIAIFIGVPTAKGDVNF | Negative |
| P24817 | VPTAKGDVNFDLSTATAKTY | Negative |
| P24817 | DLSTATAKTYTKFIEDFRAT | Negative |
| P24817 | IAIFIGVPTAKGDVNFDLST | Negative |
| P24817 | LSFLIIAIFIGVPTAKGDVN | Negative |
| P24817 | VKCLLSFLIIAIFIGVPTA  | Negative |
| P24817 | TAKGDVNFDLSTATAKTYTK | Negative |
| P24817 | AIFIGVPTAKGDVNFDLSTA | Negative |
| P24817 | STATAKTYTKFIEDFRATLP | Negative |
| P24817 | IFIGVPTAKGDVNFDLSTAT | Negative |
| P24817 | IIAIFIGVPTAKGDVNFDLS | Negative |
| P24817 | NFDLSTATAKTYTKFIEDFR | Negative |
| P24817 | LSTATAKTYTKFIEDFRATL | Negative |
| P24817 | KGDVNFDLSTATAKTYTKFI | Negative |
| P24817 | LLSFLIIAIFIGVPTAKGD  | Negative |
| P24817 | PTAKGDVNFDLSTATAKTYT | Negative |
| P24817 | VNFDLSTATAKTYTKFIEDF | Negative |
| P24817 | GDVNFDLSTATAKTYTKFIE | Negative |
| P24817 | FDLSTATAKTYTKFIEDFRA | Negative |
| P24817 | AKGDVNFDLSTATAKTYTKF | Negative |
| P24817 | GVPTAKGDVNFDLSTATAKT | Negative |
| P24817 | MVKCLLSFLIIAIFIGVPT  | Negative |
| P24817 | CLLSFLIIAIFIGVPTAKG  | Negative |
| P24817 | KCLLSFLIIAIFIGVPTAK  | Negative |
| P24817 | LLSFLIIAIFIGVPTAKGDV | Negative |
| P24821 | LKKVIRHKRQSGVNATLPEE | Negative |
| P24821 | QLLAGVFLAFLALATEGGVL | Negative |
| P24821 | GVFLAFLALATEGGVLKKVI | Negative |
| P24821 | MTQLLAGVFLAFLALATEGG | Negative |
| P24821 | MGAMTQLLAGVFLAFLALAT | Negative |
| P24821 | LAFLALATEGGVLKKVIRHK | Negative |
| P24821 | RHKRQSGVNATLPEENQPVV | Negative |
| P24821 | VFLAFLALATEGGVLKKVIR | Negative |
| P24821 | LATEGGVLKKVIRHKRQSGV | Negative |
| P24821 | LALATEGGVLKKVIRHKRQS | Negative |
| P24821 | KKVIRHKRQSGVNATLPEEN | Negative |
| P24821 | AFLALATEGGVLKKVIRHKR | Negative |
| P24821 | ALATEGGVLKKVIRHKRQSG | Negative |



|        |                      |          |
|--------|----------------------|----------|
| P24821 | EGGVLKKVIRHKRQSGVNAT | Negative |
| P24821 | IRHKRQSGVNATLPEENQPV | Negative |
| P24821 | FLAFLALATEGGVLKKVIRH | Negative |
| P24821 | TQLLAGVFLAFLALATEGGV | Negative |
| P24821 | AMTQLLAGVFLAFLALATEG | Negative |
| P24821 | VLKKVIRHKRQSGVNATLPE | Negative |
| P24821 | KVIRHKRQSGVNATLPEENQ | Negative |
| P24821 | ATEGGVLKKVIRHKRQSGVN | Negative |
| P24821 | AGVFLAFLALATEGGVLKKV | Negative |
| P24821 | GVLKKVIRHKRQSGVNATLP | Negative |
| P24821 | GGVLKKVIRHKRQSGVNATL | Negative |
| P24821 | LLAGVFLAFLALATEGGVLK | Negative |
| P24821 | TEGGVLKKVIRHKRQSGVNA | Negative |
| P24821 | FLALATEGGVLKKVIRHKRQ | Negative |
| P24821 | GAMTQLLAGVFLAFLALATE | Negative |
| P24821 | VIRHKRQSGVNATLPEENQP | Negative |
| P24854 | LSASGPRPSLGDEAIHCPPC | Negative |
| P24854 | VAALLLSASGPRPSLGDEAI | Negative |
| P24854 | CLVAALLLSASGPRPSLGDE | Negative |
| P24854 | PSLGDEAIHCPPCSEEKLAR | Negative |
| P24854 | DEAIHCPPCSEEKLARCRPP | Negative |
| P24854 | IHCPPCSEEKLARCRPPVGC | Negative |
| P24854 | LPLCLVAALLLSASGPRPSL | Negative |
| P24854 | RPSLGDEAIHCPPCSEEKLA | Negative |
| P24854 | LVAALLLSASGPRPSLGDEA | Negative |
| P24854 | GPRPSLGDEAIHCPPCSEEK | Negative |
| P24854 | HCPPCSEEKLARCRPPVGCE | Negative |
| P24854 | SASGPRPSLGDEAIHCPPCS | Negative |
| P24854 | LCLVAALLLSASGPRPSLGD | Negative |
| P24854 | PLCLVAALLLSASGPRPSLG | Negative |
| P24854 | LLSASGPRPSLGDEAIHCPP | Negative |
| P24854 | PCSEEKLARCRPPVGCEELV | Negative |
| P24854 | PRPSLGDEAIHCPPCSEEKL | Negative |
| P24854 | LGDEAIHCPPCSEEKLARCR | Negative |
| P24854 | LLLSASGPRPSLGDEAIHCP | Negative |
| P24854 | SGPRPSLGDEAIHCPPCSEE | Negative |
| P24854 | MLPLCLVAALLLSASGPRPS | Negative |
| P24854 | CPPCSEEKLARCRPPVGCEE | Negative |
| P24854 | GDEAIHCPPCSEEKLARCRP | Negative |
| P24854 | EAIHCPPCSEEKLARCRPPV | Negative |
| P24854 | PPCSEEKLARCRPPVGCEEL | Negative |
| P24854 | ALLLSASGPRPSLGDEAIHC | Negative |
| P24854 | AIHCPPCSEEKLARCRPPVG | Negative |
| P24854 | SLGDEAIHCPPCSEEKLARC | Negative |
| P24854 | ASGPRPSLGDEAIHCPPCSE | Negative |
| P24855 | AVSLKIAAFNIQTFGETKMS | Negative |

|        |                      |          |
|--------|----------------------|----------|
| P24855 | LLQGAVSLKIAAFNIQTFGE | Negative |
| P24855 | QGAVSLKIAAFNIQTFGETK | Negative |
| P24855 | AAFNIQTFGETKMSNATLVS | Negative |
| P24855 | SLKIAAFNIQTFGETKMSNA | Negative |
| P24855 | VSLKIAAFNIQTFGETKMSN | Negative |
| P24855 | ALAALLQGAVSLKIAAFNIQ | Negative |
| P24855 | LLGALLALAALLQGAVSLKI | Negative |
| P24855 | LALAALLQGAVSLKIAAFNI | Negative |
| P24855 | LGALLALAALLQGAVSLKIA | Negative |
| P24855 | KIAAFNIQTFGETKMSNATL | Negative |
| P24855 | MKLLGALLALAALLQGAVSL | Negative |
| P24855 | GAVSLKIAAFNIQTFGETKM | Negative |
| P24855 | KLLGALLALAALLQGAVSLK | Negative |
| P24855 | IAAFNIQTFGETKMSNATLV | Negative |
| P24855 | LLALAALLQGAVSLKIAAFN | Negative |
| P24855 | MRGMKLLGALLALAALLQGA | Negative |
| P24855 | LQGAVSLKIAAFNIQTFGET | Negative |
| P24855 | RGMKLLGALLALAALLQGAV | Negative |
| P24855 | FNIQTFGETKMSNATLVSYI | Negative |
| P24855 | LAALLQGAVSLKIAAFNIQT | Negative |
| P24855 | GMKLLGALLALAALLQGAVS | Negative |
| P24855 | AFNIQTFGETKMSNATLVSY | Negative |
| P24855 | AALLQGAVSLKIAAFNIQTF | Negative |
| P24855 | IQTFGETKMSNATLVSYIVQ | Negative |
| P24855 | ALLALAALLQGAVSLKIAAF | Negative |
| P24855 | LKIAAFNIQTFGETKMSNAT | Negative |
| P24855 | ALLQGAVSLKIAAFNIQTFG | Negative |
| P24855 | NIQTFGETKMSNATLVSYIV | Negative |
| P25031 | PVMSWMLLSCLMLLSQVQGE | Negative |
| P25031 | EDSPKKIPSARISCPKGSQA | Negative |
| P25031 | MLLSQVQGEDSPKKIPSARI | Negative |
| P25031 | LLSQVQGEDSPKKIPSARIS | Negative |
| P25031 | PKKIPSARISCPKGSQAYGS | Negative |
| P25031 | QGEDSPKKIPSARISCPKGS | Negative |
| P25031 | MLHRLAFPVMSWMLLSCLML | Negative |
| P25031 | GEDSPKKIPSARISCPKGSQ | Negative |
| P25031 | AFPVMSWMLLSCLMLLSQVQ | Negative |
| P25031 | SPKKIPSARISCPKGSQAYG | Negative |
| P25031 | LSQVQGEDSPKKIPSARISC | Negative |
| P25031 | RLAFPVMSWMLLSCLMLLSQ | Negative |
| P25031 | CLMLLSQVQGEDSPKKIPSA | Negative |
| P25031 | LAFPVMSWMLLSCLMLLSQV | Negative |
| P25031 | QVQGEDSPKKIPSARISCPK | Negative |
| P25031 | MSWMLLSCLMLLSQVQGEDS | Negative |
| P25031 | DSPKKIPSARISCPKGSQAY | Negative |
| P25031 | LMLLSQVQGEDSPKKIPSAR | Negative |

|        |                      |          |
|--------|----------------------|----------|
| P25031 | LLSCLMLLSQVQGEDSPKKI | Negative |
| P25031 | VQGEDSPKKIPSARISCPKG | Negative |
| P25031 | SCLMLLSQVQGEDSPKKIPS | Negative |
| P25031 | LSCLMLLSQVQGEDSPKKIP | Negative |
| P25031 | VMSWMLLSCLMLLSQVQGED | Negative |
| P25031 | SQVQGEDSPKKIPSARISCP | Negative |
| P25031 | HRLAFPVMSWMLLSCLMLLS | Negative |
| P25031 | FPVMSWMLLSCLMLLSQVQG | Negative |
| P25031 | SWMLLSCLMLLSQVQGEDSP | Negative |
| P25031 | MLLSCLMLLSQVQGEDSPKK | Negative |
| P25031 | LHRLAFPVMSWMLLSCLMLL | Negative |
| P25033 | VLKDQPAEVLFRENNPTVLE | Negative |
| P25033 | MAFKSIAVLSACIIVGSALP | Negative |
| P25033 | QPAEVLFRENNPTVLECIIE | Negative |
| P25033 | SACIIVGSALPVDKYPVLKD | Negative |
| P25033 | LPVDKYPVLKDQPAEVLFRE | Negative |
| P25033 | KSIAVLSACIIVGSALPVDK | Negative |
| P25033 | VLSACIIVGSALPVDKYPVL | Negative |
| P25033 | CIIVGSALPVDKYPVLKDQP | Negative |
| P25033 | PVDKYPVLKDQPAEVLFREN | Negative |
| P25033 | DQPAEVLFRENNPTVLECI  | Negative |
| P25033 | IVGSALPVDKYPVLKDQPAE | Negative |
| P25033 | PVLKDQPAEVLFRENNPTVL | Negative |
| P25033 | IAVLSACIIVGSALPVDKYP | Negative |
| P25033 | GSALPVDKYPVLKDQPAEVL | Negative |
| P25033 | SALPVDKYPVLKDQPAEVL  | Negative |
| P25033 | ACIIVGSALPVDKYPVLKDQ | Negative |
| P25033 | LSACIIVGSALPVDKYPVLK | Negative |
| P25033 | IIVGSALPVDKYPVLKDQPA | Negative |
| P25033 | AFKSIAVLSACIIVGSALPV | Negative |
| P25033 | LKDQPAEVLFRENNPTVLEC | Negative |
| P25033 | FKSIAVLSACIIVGSALPVD | Negative |
| P25033 | YPVLKDQPAEVLFRENNPTV | Negative |
| P25033 | VGSALPVDKYPVLKDQPAEV | Negative |
| P25033 | KDQPAEVLFRENNPTVLECI | Negative |
| P25033 | DKYPVLKDQPAEVLFRENNP | Negative |
| P25033 | VDKYPVLKDQPAEVLFRENN | Negative |
| P25033 | KYPVLKDQPAEVLFRENNPT | Negative |
| P25033 | AVLSACIIVGSALPVDKYPV | Negative |
| P25033 | ALPVDKYPVLKDQPAEVLFR | Negative |
| P25068 | HLLLALLFLVLSAWSGFTQG | Negative |
| P25068 | HHLLLALLFLVLSAWSGFTQ | Negative |
| P25068 | TQGVGNPVSCVRNKGICVPI | Negative |
| P25068 | LVLSAWSGFTQGVGNPVSCV | Negative |
| P25068 | VLSAWSGFTQGVGNPVSCVR | Negative |
| P25068 | SAWSGFTQGVGNPVSCVRNK | Negative |

|        |                      |          |
|--------|----------------------|----------|
| P25068 | LFLVLSAWSGFTQGVGNPVS | Negative |
| P25068 | NPVSCVRNKGICVPIRCPGS | Negative |
| P25068 | GFTQGVGNPVSCVRNKGICV | Negative |
| P25068 | FTQGVGNPVSCVRNKGICVP | Negative |
| P25068 | SCVRNKGICVPIRCPGSMKQ | Negative |
| P25068 | RLHLLLALLFLVLSAWSGF  | Negative |
| P25068 | PVSCVRNKGICVPIRCPGSM | Negative |
| P25068 | GVGNPVSCVRNKGICVPIRC | Negative |
| P25068 | LLLALLFLVLSAWSGFTQGV | Negative |
| P25068 | VSCVRNKGICVPIRCPGSMK | Negative |
| P25068 | LHLLLALLFLVLSAWSGFT  | Negative |
| P25068 | AWSGFTQGVGNPVSCVRNKG | Negative |
| P25068 | LLALLFLVLSAWSGFTQGVG | Negative |
| P25068 | LALLFLVLSAWSGFTQGVGN | Negative |
| P25068 | LSAWSGFTQGVGNPVSCVRN | Negative |
| P25068 | WSGFTQGVGNPVSCVRNKG  | Negative |
| P25068 | QGVGNPVSCVRNKGICVPIR | Negative |
| P25068 | VGNPVSCVRNKGICVPIRCP | Negative |
| P25068 | MRLHLLLALLFLVLSAWSG  | Negative |
| P25068 | GNPVSCVRNKGICVPIRCPG | Negative |
| P25068 | ALLFLVLSAWSGFTQGVGNP | Negative |
| P25068 | LLFLVLSAWSGFTQGVGNPV | Negative |
| P25068 | SGFTQGVGNPVSCVRNKGIC | Negative |
| P25275 | IAPFAGTTAVMTLATTHAAM | Negative |
| P25275 | GAVACAMSIAPFAGTTAVMT | Negative |
| P25275 | PFAGTTAVMTLATTHAAMAA | Negative |
| P25275 | ARTMRSRVVAGAVACAMSI  | Negative |
| P25275 | AVACAMSIAPFAGTTAVMTL | Negative |
| P25275 | AGTTAVMTLATTHAAMAATA | Negative |
| P25275 | CAMSIAPFAGTTAVMTLATT | Negative |
| P25275 | FAGTTAVMTLATTHAAMAAT | Negative |
| P25275 | APFAGTTAVMTLATTHAAMA | Negative |
| P25275 | VAGAVACAMSIAPFAGTTAV | Negative |
| P25275 | VACAMSIAPFAGTTAVMTLA | Negative |
| P25275 | MARTMRSRVVAGAVACAMSI | Negative |
| P25275 | SRVVAGAVACAMSIAPFAGT | Negative |
| P25275 | SIAPFAGTTAVMTLATTHAA | Negative |
| P25275 | RVVAGAVACAMSIAPFAGTT | Negative |
| P25275 | AGAVACAMSIAPFAGTTAVM | Negative |
| P25275 | MSIAPFAGTTAVMTLATTHA | Negative |
| P25275 | AVMTLATTHAAMAATAPADG | Negative |
| P25275 | VMTLATTHAAMAATAPADGY | Negative |
| P25275 | TTAVMTLATTHAAMAATAPA | Negative |
| P25275 | VVAGAVACAMSIAPFAGTTA | Negative |
| P25275 | GTTAVMTLATTHAAMAATAP | Negative |
| P25275 | TMRSRVVAGAVACAMSIAPF | Negative |

|        |                       |          |
|--------|-----------------------|----------|
| P25275 | ACAMSIAPFAGTTAVMTLAT  | Negative |
| P25275 | RSRVVAGAVACAMSIAPFAG  | Negative |
| P25275 | AMSIAPFAGTTAVMTLATTH  | Negative |
| P25275 | RTMRSRVVAGAVACAMSIAP  | Negative |
| P25275 | TAVMTLATTHAAMAATAPAD  | Negative |
| P25275 | MRSRVVAGAVACAMSIAPFA  | Negative |
| P25289 | LLLDVVVKPAEGQSSCSLSS  | Negative |
| P25289 | TVLLTLLLDVVVKPAEGQSS  | Negative |
| P25289 | LTLLLDVVVKPAEGQSSCSL  | Negative |
| P25289 | GVRLVFTNAFVVTVLLTLLL  | Negative |
| P25289 | TLLLDVVVKPAEGQSSCSLS  | Negative |
| P25289 | FVVTVLLTLLLDVVVKPAEG  | Negative |
| P25289 | VKPAEGQSSCSLSSRPHPRG  | Negative |
| P25289 | VLLTLLLDVVVKPAEGQSSC  | Negative |
| P25289 | DVVVKPAEGQSSCSLSSRPH  | Negative |
| P25289 | VFTNAFVVTVLLTLLLDVVV  | Negative |
| P25289 | AEGQSSCSLSSRPHPRGICG  | Negative |
| P25289 | VVKPAEGQSSCSLSSRPHPR  | Negative |
| P25289 | VVVKPAEGQSSCSLSSRPHP  | Negative |
| P25289 | LDVVVKPAEGQSSCSLSSRP  | Negative |
| P25289 | VRLVFTNAFVVTVLLTLLLD  | Negative |
| P25289 | RLVFTNAFVVTVLLTLLLDV  | Negative |
| P25289 | EGQSSCSLSSRPHPRGICGS  | Negative |
| P25289 | VVTVLLTLLLDVVVKPAEGQ  | Negative |
| P25289 | VGVRVLVFTNAFVVTVLLTLL | Negative |
| P25289 | PAEGQSSCSLSSRPHPRGIC  | Negative |
| P25289 | MVGVRLVFTNAFVVTVLLTL  | Negative |
| P25289 | AFVVTVLLTLLLDVVVKPAE  | Negative |
| P25289 | TNAFVVTVLLTLLLDVVVKP  | Negative |
| P25289 | NAFVVTVLLTLLLDVVVKPA  | Negative |
| P25289 | KPAEGQSSCSLSSRPHPRGI  | Negative |
| P25289 | FTNAFVVTVLLTLLLDVVVK  | Negative |
| P25289 | LVFTNAFVVTVLLTLLLDVV  | Negative |
| P25289 | LLDVVVVKPAEGQSSCSLSSR | Negative |
| P25289 | VTVLLTLLLDVVVKPAEGQS  | Negative |
| P25291 | LINTRSYDPCQNYTLLDEPS  | Negative |
| P25291 | INTRSYDPCQNYTLLDEPSR  | Negative |
| P25291 | WLALASCILTLASPEQQGNR  | Negative |
| P25291 | SPEQQGNRNLINTRSYDPCQ  | Negative |
| P25291 | VGSYVLWLALASCILTLASP  | Negative |
| P25291 | NRNLINTRSYDPCQNYTLLD  | Negative |
| P25291 | LASPEQQGNRNLINTRSYDP  | Negative |
| P25291 | YVLWLALASCILTLASPEQQ  | Negative |
| P25291 | LALASCILTLASPEQQGNRN  | Negative |
| P25291 | TLASPEQQGNRNLINTRSYD  | Negative |
| P25291 | QQGNRNLINTRSYDPCQNYT  | Negative |

|        |                      |          |
|--------|----------------------|----------|
| P25291 | ILTLASPEQQGNRNLINTRS | Negative |
| P25291 | PEQQGNRNLINTRSYDPCQN | Negative |
| P25291 | RNLINTRSYDPCQNYTLLDE | Negative |
| P25291 | LASCILTLASPEQQGNRNL  | Negative |
| P25291 | MVGSYVLWLALASCILTLAS | Negative |
| P25291 | ASCILTLASPEQQGNRNLIN | Negative |
| P25291 | VLWLALASCILTLASPEQQG | Negative |
| P25291 | LTLASPEQQGNRNLINTRSY | Negative |
| P25291 | EQQGNRNLINTRSYDPCQNY | Negative |
| P25291 | GSYVLWLALASCILTLASPE | Negative |
| P25291 | ALASCILTLASPEQQGNRNL | Negative |
| P25291 | NLINTRSYDPCQNYTLLDEP | Negative |
| P25291 | GNRNLINTRSYDPCQNYTLL | Negative |
| P25291 | QGNRNLINTRSYDPCQNYTL | Negative |
| P25291 | ASPEQQGNRNLINTRSYDPC | Negative |
| P25291 | SYVLWLALASCILTLASPEQ | Negative |
| P25291 | CILTLASPEQQGNRNLINTR | Negative |
| P25291 | SCILTLASPEQQGNRNLINT | Negative |
| P25311 | LTYYITGLSKHVEDVPAFQA | Negative |
| P25311 | YSLTYIYTGLSKHVEDVPAF | Negative |
| P25311 | DGRYSLTYIYTGLSKHVEDV | Negative |
| P25311 | PAVPQENQDGRYSLTYIYTG | Negative |
| P25311 | VPVLLSLLLLGPAVPQENQ  | Negative |
| P25311 | SLTYIYTGLSKHVEDVPAFQ | Negative |
| P25311 | VLLSLLLLGPAVPQENQDG  | Negative |
| P25311 | NQDGRYSLTYIYTGLSKHVE | Negative |
| P25311 | GPAVPQENQDGRYSLTYIYT | Negative |
| P25311 | MVPVLLSLLLLGPAVPQEN  | Negative |
| P25311 | SLLLLGPAVPQENQDGRYS  | Negative |
| P25311 | VRMVPVLLSLLLLGPAVPQ  | Negative |
| P25311 | RMVPVLLSLLLLGPAVPQE  | Negative |
| P25311 | LLLLGPAVPQENQDGRYSLT | Negative |
| P25311 | PQENQDGRYSLTYIYTGLSK | Negative |
| P25311 | GRYSLTYIYTGLSKHVEDVP | Negative |
| P25311 | MVRMVPVLLSLLLLGPAVP  | Negative |
| P25311 | LGPAVPQENQDGRYSLTYIY | Negative |
| P25311 | LLLLGPAVPQENQDGRYSL  | Negative |
| P25311 | LLSLLLLGPAVPQENQDGR  | Negative |
| P25311 | QENQDGRYSLTYIYTGLSKH | Negative |
| P25311 | RYSLTYYITGLSKHVEDVPA | Negative |
| P25311 | LSLLLLGPAVPQENQDGRY  | Negative |
| P25311 | QDGRYSLTYIYTGLSKHVED | Negative |
| P25311 | LLGPAVPQENQDGRYSLTYI | Negative |
| P25311 | VPQENQDGRYSLTYIYTGLS | Negative |
| P25311 | ENQDGRYSLTYIYTGLSKHV | Negative |
| P25311 | LLGPAVPQENQDGRYSLTY  | Negative |

|        |                      |          |
|--------|----------------------|----------|
| P25311 | AVPQENQDGRYSLTYIYTGL | Negative |
| P25331 | TAVIVVALAVAFMVNLDYAN | Negative |
| P25331 | ANCSPAIASSYDAMEICIEN | Negative |
| P25331 | PAIASSYDAMEICIENCAQC | Negative |
| P25331 | LAVAFMVNLDYANCSPAIAS | Negative |
| P25331 | FMVNLDYANCSPAIASSYDA | Negative |
| P25331 | VNLDYANCSPAIASSYDAME | Negative |
| P25331 | IVVALAVAFMVNLDYANCSP | Negative |
| P25331 | AIASSYDAMEICIENCAQCK | Negative |
| P25331 | VVALAVAFMVNLDYANCSPA | Negative |
| P25331 | VAFMVNLDYANCSPAIASSY | Negative |
| P25331 | AVIVVALAVAFMVNLDYANC | Negative |
| P25331 | MVNLDYANCSPAIASSYDAM | Negative |
| P25331 | NCSPAIASSYDAMEICIENC | Negative |
| P25331 | AFMVNLDYANCSPAIASSYD | Negative |
| P25331 | NLDYANCSPAIASSYDAMEI | Negative |
| P25331 | SPAIASSYDAMEICIENCAQ | Negative |
| P25331 | YANCSPAIASSYDAMEICIE | Negative |
| P25331 | NKLTAVIVVALAVAFMVNLD | Negative |
| P25331 | VIVVALAVAFMVNLDYANCS | Negative |
| P25331 | CSPAIASSYDAMEICIENCA | Negative |
| P25331 | LDYANCSPAIASSYDAMEIC | Negative |
| P25331 | AVAFMVNLDYANCSPAIASS | Negative |
| P25331 | DYANCSPAIASSYDAMEICI | Negative |
| P25331 | IASSYDAMEICIENCAQCKK | Negative |
| P25331 | ANKLTAVIVVALAVAFMVNL | Negative |
| P25331 | KLTAVIVVALAVAFMVNLDY | Negative |
| P25331 | VALAVAFMVNLDYANCSPA  | Negative |
| P25331 | MANKLTAVIVVALAVAFMVN | Negative |
| P25331 | LTAVIVVALAVAFMVNLDYA | Negative |
| P25403 | ILFIAMSAMIEAQCIGNGR  | Negative |
| P25403 | LPVAFLKFAIVLILFIAMSA | Negative |
| P25403 | AIVLILFIAMSAMIEAQCIG | Negative |
| P25403 | NGGRCNENVGPPYCCSGFCL | Negative |
| P25403 | MIEAQCIGNGGRCNENVGPP | Negative |
| P25403 | VAFKFAIVLILFIAMSAMI  | Negative |
| P25403 | FLKFAIVLILFIAMSAMIEA | Negative |
| P25403 | QCIGNGGRCNENVGPPYCCS | Negative |
| P25403 | VLILFIAMSAMIEAQCIGNG | Negative |
| P25403 | KFAIVLILFIAMSAMIEAQC | Negative |
| P25403 | GNGGRCNENVGPPYCCSGFC | Negative |
| P25403 | IGNGGRCNENVGPPYCCSGF | Negative |
| P25403 | AMSAMIEAQCIGNGGRCNEN | Negative |
| P25403 | MSAMIEAQCIGNGGRCNENV | Negative |
| P25403 | EAQCIGNGGRCNENVGPPYC | Negative |
| P25403 | LFIAMSAMIEAQCIGNGGRC | Negative |

|        |                      |          |
|--------|----------------------|----------|
| P25403 | IAMSAMIEAQCIGNGGRCNE | Negative |
| P25403 | LILFIAMSAMIEAQCIGNGG | Negative |
| P25403 | AMIEAQCIGNGGRCNENVGP | Negative |
| P25403 | PVAFLKFAIVLILFIAMSAM | Negative |
| P25403 | AFLKFAIVLILFIAMSAMIE | Negative |
| P25403 | IEAQCIGNGGRCNENVGPPY | Negative |
| P25403 | FAIVLILFIAMSAMIEAQCI | Negative |
| P25403 | FIAMSAMIEAQCIGNGGRCN | Negative |
| P25403 | LKFAIVLILFIAMSAMIEAQ | Negative |
| P25403 | CIGNGGRCNENVGPPYCCSG | Negative |
| P25403 | AQCIGNGGRCNENVGPPYCC | Negative |
| P25403 | SAMIEAQCIGNGGRCNENVG | Negative |
| P25403 | GGRCNENVGPPYCCSGFCLR | Negative |
| P25404 | FIAMSGMIEACIGNGGRCNE | Negative |
| P25404 | IEACIGNGGRCNENVGPPYC | Negative |
| P25404 | VPIAFLKFVIVLILFIAMSG | Negative |
| P25404 | LFIAMSGMIEACIGNGGRCN | Negative |
| P25404 | MAKVPIAFLKFVIVLILFIA | Negative |
| P25404 | EACIGNGGRCNENVGPPYCC | Negative |
| P25404 | PIAFLKFVIVLILFIAMSGM | Negative |
| P25404 | ILFIAMSGMIEACIGNGGRC | Negative |
| P25404 | MSGMIEACIGNGGRCNENVG | Negative |
| P25404 | VIVLILFIAMSGMIEACIGN | Negative |
| P25404 | AMSGMIEACIGNGGRCNENV | Negative |
| P25404 | LILFIAMSGMIEACIGNGGR | Negative |
| P25404 | FVIVLILFIAMSGMIEACIG | Negative |
| P25404 | IAMSGMIEACIGNGGRCNEN | Negative |
| P25404 | GMIEACIGNGGRCNENVGPP | Negative |
| P25404 | FLKFVIVLILFIAMSGMIEA | Negative |
| P25404 | GNGGRCNENVGPPYCCSGFC | Negative |
| P25404 | CIGNGGRCNENVGPPYCCSG | Negative |
| P25404 | KVPIAFLKFVIVLILFIAMS | Negative |
| P25404 | AKVPIAFLKFVIVLILFIAM | Negative |
| P25404 | SGMIEACIGNGGRCNENVGP | Negative |
| P25404 | KFVIVLILFIAMSGMIEACI | Negative |
| P25404 | IGNGGRCNENVGPPYCCSGF | Negative |
| P25404 | AFLKFVIVLILFIAMSGMIE | Negative |
| P25404 | ACIGNGGRCNENVGPPYCCS | Negative |
| P25404 | VLILFIAMSGMIEACIGNGG | Negative |
| P25404 | MIEACIGNGGRCNENVGPPY | Negative |
| P25404 | LKFVIVLILFIAMSGMIEAC | Negative |
| P25404 | IAFLKFVIVLILFIAMSGMI | Negative |
| P25718 | EQGTGTFVSHAQLPKGTRPL | Negative |
| P25718 | MKLAACFLTLLPGFAVAASW | Negative |
| P25718 | SWTSPGFPAFSEQGTGTFVS | Negative |
| P25718 | SPGFPAFSEQGTGTFVSHAQ | Negative |



|        |                      |          |
|--------|----------------------|----------|
| P25718 | PGFPAFSEQGTGTFVSHAQL | Negative |
| P25718 | KLAACFLTLLPGFAVAASWT | Negative |
| P25718 | GFAVAASWTSPGFPAFSEQG | Negative |
| P25718 | AACFLTLLPGFAVAASWTSP | Negative |
| P25718 | CFLTLLPGFAVAASWTSPGF | Negative |
| P25718 | AASWTSPGFPAFSEQGTGTF | Negative |
| P25718 | WTSPGFPAFSEQGTGTFVSH | Negative |
| P25718 | LLPGFAVAASWTSPGFPAFS | Negative |
| P25718 | TSPGFPAFSEQGTGTFVSHA | Negative |
| P25718 | PGFAVAASWTSPGFPAFSEQ | Negative |
| P25718 | FPAFSEQGTGTFVSHAQLPK | Negative |
| P25718 | TLLPGFAVAASWTSPGFPAF | Negative |
| P25718 | PAFSEQGTGTFVSHAQLPKG | Negative |
| P25718 | ACFLTLLPGFAVAASWTSPG | Negative |
| P25718 | FLTLLPGFAVAASWTSPGFP | Negative |
| P25718 | AFSEQGTGTFVSHAQLPKG  | Negative |
| P25718 | LTLLPGFAVAASWTSPGFPA | Negative |
| P25718 | LPGFAVAASWTSPGFPAFSE | Negative |
| P25718 | FSEQGTGTFVSHAQLPKGTR | Negative |
| P25718 | GFPAFSEQGTGTFVSHAQLP | Negative |
| P25718 | VAASWTSPGFPAFSEQGTGT | Negative |
| P25718 | ASWTSPGFPAFSEQGTGTFV | Negative |
| P25718 | AVAASWTSPGFPAFSEQGTG | Negative |
| P25718 | FAVAASWTSPGFPAFSEQGT | Negative |
| P25718 | SEQGTGTFVSHAQLPKGTRP | Negative |
| P25796 | FLLLLLVLLELGQAPGALHR | Negative |
| P25796 | LVLLELGQAPGALHRVPLSR | Negative |
| P25796 | LELGQAPGALHRVPLSRRES | Negative |
| P25796 | APGALHRVPLSRRESLRKKL | Negative |
| P25796 | LLVLLELGQAPGALHRVPLS | Negative |
| P25796 | KTFLLLLLVLLELGQAPGAL | Negative |
| P25796 | HRVPLSRRESLRKKLRAQGQ | Negative |
| P25796 | RRESLRKKLRAQGQLTELWK | Negative |
| P25796 | SRRESLRKKLRAQGQLTELW | Negative |
| P25796 | LSRRESLRKKLRAQGQLTEL | Negative |
| P25796 | QAPGALHRVPLSRRESLRKK | Negative |
| P25796 | ALHRVPLSRRESLRKKLRAQ | Negative |
| P25796 | PLSRRESLRKKLRAQGQLTE | Negative |
| P25796 | ELGQAPGALHRVPLSRRESL | Negative |
| P25796 | LHRVPLSRRESLRKKLRAQG | Negative |
| P25796 | TFLLLLLVLLELGQAPGALH | Negative |
| P25796 | RESLRKKLRAQGQLTELWKS | Negative |
| P25796 | ESLRKKLRAQGQLTELWKSQ | Negative |
| P25796 | MKTFLLLLLVLLELGQAPGA | Negative |
| P25796 | RVPLSRRESLRKKLRAQGQL | Negative |
| P25796 | VLLELGQAPGALHRVPLSRR | Negative |

|        |                       |          |
|--------|-----------------------|----------|
| P25796 | LLLVLLELGQAPGALHRVPL  | Negative |
| P25796 | GQAPGALHRVPLSRRESLRK  | Negative |
| P25796 | GALHRVPLSRRESLRKKLRA  | Negative |
| P25796 | LLELGQAPGALHRVPLSRRE  | Negative |
| P25796 | VPLSRRESLRKKLRAQGQLT  | Negative |
| P25796 | PGALHRVPLSRRESLRKKLR  | Negative |
| P25796 | LLLLVLLELGQAPGALHRVP  | Negative |
| P25796 | LGQAPGALHRVPLSRRESLR  | Negative |
| P25871 | SHLTTFLVFFLLAFVTTYTYA | Negative |
| P25871 | HNNCPYTVWAAATPVGGGR   | Negative |
| P25871 | TTFLVFFLLAFVTTYTYASGV | Negative |
| P25871 | LLAFVTTYTYASGVFEVHNNC | Negative |
| P25871 | VHNNCPYTVWAAATPVGGGR  | Negative |
| P25871 | HLTTFLVFFLLAFVTTYTYAS | Negative |
| P25871 | NCPYTVWAAATPVGGGRLE   | Negative |
| P25871 | LVFFLLAFVTTYTYASGVFEV | Negative |
| P25871 | LTTFLVFFLLAFVTTYTYASG | Negative |
| P25871 | FFLLAFVTTYTYASGVFEVHN | Negative |
| P25871 | ASGVFEVHNNCPYTVWAAAT  | Negative |
| P25871 | TYASGVFEVHNNCPYTVWAA  | Negative |
| P25871 | FVTTYTYASGVFEVHNNCPYT | Negative |
| P25871 | VFEVHNNCPYTVWAAATPVG  | Negative |
| P25871 | VFFLLAFVTTYTYASGVFEVH | Negative |
| P25871 | NNCPYTVWAAATPVGGGRRL  | Negative |
| P25871 | SGVFEVHNNCPYTVWAAATP  | Negative |
| P25871 | FLLAFVTTYTYASGVFEVHNN | Negative |
| P25871 | FEVHNNCPYTVWAAATPVGG  | Negative |
| P25871 | YASGVFEVHNNCPYTVWAAA  | Negative |
| P25871 | TYTYASGVFEVHNNCPYTVW  | Negative |
| P25871 | LAFVTTYTYASGVFEVHNNCP | Negative |
| P25871 | TFLVFFLLAFVTTYTYASGVF | Negative |
| P25871 | MSHLTTFLVFFLLAFVTTYTY | Negative |
| P25871 | VTYTYASGVFEVHNNCPYTV  | Negative |
| P25871 | EVHNNCPYTVWAAATPVGGG  | Negative |
| P25871 | YTYASGVFEVHNNCPYTVWA  | Negative |
| P25871 | GVFEVHNNCPYTVWAAATPV  | Negative |
| P25871 | AFVTTYTYASGVFEVHNNCPY | Negative |
| P26202 | AIPRRRLRYEEVVAQALQFY  | Negative |
| P26202 | YEEVVAQALQFYNEGQQGQP  | Negative |
| P26202 | LVGLAVVACAIPRRRLRYEE  | Negative |
| P26202 | VLVVLVGLAVVACAIPRRRL  | Negative |
| P26202 | WKVLVVLVGLAVVACAIPRR  | Negative |
| P26202 | VACAIPRRRLRYEEVVAQAL  | Negative |
| P26202 | PRRRLRYEEVVAQALQFYNE  | Negative |
| P26202 | RRRLRYEEVVAQALQFYNEG  | Negative |
| P26202 | VWKVLVVLVGLAVVACAIPR  | Negative |

|        |                       |          |
|--------|-----------------------|----------|
| P26202 | AGVWKVLVVLVGLAVVACAI  | Negative |
| P26202 | VLVGLAVVACAIPRRRLRYE  | Negative |
| P26202 | MAGVWKVLVVLVGLAVVACA  | Negative |
| P26202 | GVWKVLVVLVGLAVVACAIP  | Negative |
| P26202 | ACAIPRRRLRYEEVVAQALQ  | Negative |
| P26202 | EVVAQALQFYNEGQQGQPLF  | Negative |
| P26202 | VVACAIPRRRLRYEEVVAQA  | Negative |
| P26202 | IPRRRLRYEEVVAQALQFYN  | Negative |
| P26202 | RRLRYEEVVAQALQFYNEGQ  | Negative |
| P26202 | VVLVGLAVVACAIPRRRLRY  | Negative |
| P26202 | LVVLVGLAVVACAIPRRRLR  | Negative |
| P26202 | GLAVVACAIPRRRLRYEEVV  | Negative |
| P26202 | LRYYEEVVAQALQFYNEGQQG | Negative |
| P26202 | RLRYEEVVAQALQFYNEGQQ  | Negative |
| P26202 | CAIPRRRLRYEEVVAQALQF  | Negative |
| P26202 | RYEEVVAQALQFYNEGQQGQ  | Negative |
| P26202 | AVVACAIPRRRLRYEEVVAQ  | Negative |
| P26202 | EEVVAQALQFYNEGQQGQPL  | Negative |
| P26202 | VGLAVVACAIPRRRLRYEEV  | Negative |
| P26202 | LAVVACAIPRRRLRYEEVVA  | Negative |
| P26203 | GVWKVLVVLVGLAVVACAIP  | Negative |
| P26203 | GLAVVACAIPHRRLRYEEVV  | Negative |
| P26203 | LVVLVGLAVVACAIPHRRLR  | Negative |
| P26203 | VLVVLVGLAVVACAIPHRRL  | Negative |
| P26203 | AIPHRRLRYEEVVAQALQFY  | Negative |
| P26203 | VGLAVVACAIPHRRLRYEEV  | Negative |
| P26203 | MAGVWKVLVVLVGLAVVACA  | Negative |
| P26203 | AVVACAIPHRRLRYEEVVAQ  | Negative |
| P26203 | RYEEVVAQALQFYNEGQQGQ  | Negative |
| P26203 | RLRYEEVVAQALQFYNEGQQ  | Negative |
| P26203 | EEVVAQALQFYNEGQQGQPL  | Negative |
| P26203 | EVVAQALQFYNEGQQGQPLF  | Negative |
| P26203 | LAVVACAIPHRRLRYEEVVA  | Negative |
| P26203 | VLVGLAVVACAIPHRRLRYE  | Negative |
| P26203 | VVACAIPHRRLRYEEVVAQA  | Negative |
| P26203 | AGVWKVLVVLVGLAVVACAI  | Negative |
| P26203 | CAIPHRRLRYEEVVAQALQF  | Negative |
| P26203 | VWKVLVVLVGLAVVACAIPH  | Negative |
| P26203 | WKVLVVLVGLAVVACAIPHR  | Negative |
| P26203 | ACAIPHRRLRYEEVVAQALQ  | Negative |
| P26203 | VVLVGLAVVACAIPHRRLRY  | Negative |
| P26203 | YEEVVAQALQFYNEGQQGQP  | Negative |
| P26203 | VACAIPHRRLRYEEVVAQAL  | Negative |
| P26203 | LRYYEEVVAQALQFYNEGQQG | Negative |
| P26203 | IPHRRLRYEEVVAQALQFYN  | Negative |
| P26203 | LVGLAVVACAIPHRRLRYEE  | Negative |

|        |                      |          |
|--------|----------------------|----------|
| P26203 | HRRLRYEEVVAQALQFYNEG | Negative |
| P26203 | RRLRYEEVVAQALQFYNEGQ | Negative |
| P26203 | PHRRLRYEEVVAQALQFYNE | Negative |
| P26216 | LFCIVHGEKEESKGIDAKAS | Negative |
| P26216 | MACTNNAMRALFLLVLFCIV | Negative |
| P26216 | ACTNNAMRALFLLVLFCIVH | Negative |
| P26216 | VLFCIVHGEKEESKGIDAKA | Negative |
| P26216 | LVLFCIVHGEKEESKGIDAK | Negative |
| P26216 | EKEESKGIDAKASGPGGSFD | Negative |
| P26216 | IDAKASGPGGSFDITKLGAS | Negative |
| P26216 | NAMRALFLLVLFCIVHGEKE | Negative |
| P26216 | EESKGIDAKASGPGGSFDIT | Negative |
| P26216 | CTNNAMRALFLLVLFCIVHG | Negative |
| P26216 | LLVLFCIVHGEKEESKGIDA | Negative |
| P26216 | TNNAMRALFLLVLFCIVHGE | Negative |
| P26216 | IVHGEKEESKGIDAKASGPG | Negative |
| P26216 | AMRALFLLVLFCIVHGEKEE | Negative |
| P26216 | CIVHGEKEESKGIDAKASGP | Negative |
| P26216 | ESKGIDAKASGPGGSFDITK | Negative |
| P26216 | FLLVLFCIVHGEKEESKGID | Negative |
| P26216 | FCIVHGEKEESKGIDAKASG | Negative |
| P26216 | SKGIDAKASGPGGSFDITKL | Negative |
| P26216 | KGIDAKASGPGGSFDITKLG | Negative |
| P26216 | KEESKGIDAKASGPGGSFDI | Negative |
| P26216 | GEKEESKGIDAKASGPGGSF | Negative |
| P26216 | GIDAKASGPGGSFDITKLGA | Negative |
| P26216 | RALFLLVLFCIVHGEKEESK | Negative |
| P26216 | NNAMRALFLLVLFCIVHGEK | Negative |
| P26216 | ALFLLVLFCIVHGEKEESKG | Negative |
| P26216 | VHGEKEESKGIDAKASGPGG | Negative |
| P26216 | LFLVLFCIVHGEKEESKGI  | Negative |
| P26216 | HGEKEESKGIDAKASGPGGS | Negative |
| P26221 | ATAALTAGMLGVPLATGTAH | Negative |
| P26221 | SVTEPPRRRRGRHSRARRFL | Negative |
| P26221 | EPPRRRRGRHSRARRFLTSL | Negative |
| P26221 | RHSRARRFLTSLGATAALTA | Negative |
| P26221 | LTAGMLGVPLATGTAHAEP  | Negative |
| P26221 | RRRGRHSRARRFLTSLGATA | Negative |
| P26221 | PPRRRRGRHSRARRFLTSLG | Negative |
| P26221 | SRARRFLTSLGATAALTAGM | Negative |
| P26221 | RRFLTSLGATAALTAGMLGV | Negative |
| P26221 | TEPPRRRRGRHSRARRFLTS | Negative |
| P26221 | RARRFLTSLGATAALTAGML | Negative |
| P26221 | GATAALTAGMLGVPLATGTA | Negative |
| P26221 | ARRFLTSLGATAALTAGMLG | Negative |
| P26221 | LGATAALTAGMLGVPLATGT | Negative |

|        |                       |          |
|--------|-----------------------|----------|
| P26221 | TAALTAGMLGVPLATGTAHA  | Negative |
| P26221 | MSVTEPPRRRRGRHSRARRF  | Negative |
| P26221 | FLTSLGATAALTAGMLGVPL  | Negative |
| P26221 | GRHSRARRFLTSLGATAALT  | Negative |
| P26221 | PPRRRGRHSRARRFLTSLGA  | Negative |
| P26221 | RFLTSLGATAALTAGMLGV   | Negative |
| P26221 | HSRARRFLTSLGATAALTAG  | Negative |
| P26221 | PPRRRGRHSRARRFLTSLGAT | Negative |
| P26221 | TSLGATAALTAGMLGVPLAT  | Negative |
| P26221 | LTSLGATAALTAGMLGVPLA  | Negative |
| P26221 | ALTAGMLGVPLATGTAHAEP  | Negative |
| P26221 | VTEPPRRRRGRHSRARRFLT  | Negative |
| P26221 | RGRHSRARRFLTSLGATAAL  | Negative |
| P26221 | SLGATAALTAGMLGVPLATG  | Negative |
| P26221 | AALTAGMLGVPLATGTAHAE  | Negative |
| P26221 | RRGRHSRARRFLTSLGATAA  | Negative |
| P26461 | RSKKTRKEPDCDVYRSHLFF  | Negative |
| P26461 | ARSKKTRKEPDCDVYRSHLF  | Negative |
| P26461 | GFARSKKTRKEPDCDVYRSH  | Negative |
| P26461 | FFSSRVRALFILVLVLPLCS  | Negative |
| P26461 | SSRVRALFILVLVLPLCSET  | Negative |
| P26461 | LVLPLCSETGFARSKKTRKE  | Negative |
| P26461 | RALFILVLVLPLCSETGFAR  | Negative |
| P26461 | SKKTRKEPDCDVYRSHLFFC  | Negative |
| P26461 | FSSRVRALFILVLVLPLCSE  | Negative |
| P26461 | SRVRALFILVLVLPLCSETG  | Negative |
| P26461 | CSETGFARSKKTRKEPDCDV  | Negative |
| P26461 | ALFILVLVLPLCSETGFARS  | Negative |
| P26461 | KKTRKEPDCDVYRSHLFFCT  | Negative |
| P26461 | LCSETGFARSKKTRKEPDCD  | Negative |
| P26461 | LVLVLPLCSETGFARSKKTR  | Negative |
| P26461 | FARSKKTRKEPDCDVYRSHL  | Negative |
| P26461 | VLVLPLCSETGFARSKKTRK  | Negative |
| P26461 | RVRALFILVLVLPLCSETGF  | Negative |
| P26461 | MAFFSSRVRALFILVLVLPL  | Negative |
| P26461 | AFFSSRVRALFILVLVLPLC  | Negative |
| P26461 | ETGFARSKKTRKEPDCDVYR  | Negative |
| P26461 | TGFARSKKTRKEPDCDVYRS  | Negative |
| P26461 | ILVLVLPLCSETGFARSKKT  | Negative |
| P26461 | LFILVLVLPLCSETGFARSK  | Negative |
| P26461 | VLPLCSETGFARSKKTRKEP  | Negative |
| P26461 | VRALFILVLVLPLCSETGFA  | Negative |
| P26461 | PLCSETGFARSKKTRKEPDC  | Negative |
| P26461 | LPLCSETGFARSKKTRKEPD  | Negative |
| P26461 | SETGFARSKKTRKEPDCDVY  | Negative |
| P26501 | KCPKILAALLGCAVLAVGPA  | Negative |

|        |                      |          |
|--------|----------------------|----------|
| P26501 | AVLAGVPAMPAHAAINSMSL | Negative |
| P26501 | LAALLGCAVLAVGPAMPAHA | Negative |
| P26501 | SMSLGASYDAQQANITFRVY | Negative |
| P26501 | VLAGVPAMPAHAAINSMSLG | Negative |
| P26501 | CAVLAVGPAMPAHAAINSMS | Negative |
| P26501 | MKCPKILAALLGCAVLAVGP | Negative |
| P26501 | KILAALLGCAVLAVGPAMPA | Negative |
| P26501 | PAMPAHAAINSMSLGASYDA | Negative |
| P26501 | LGCAVLAVGPAMPAHAAINS | Negative |
| P26501 | LAGVPAMPAHAAINSMSLGA | Negative |
| P26501 | AAINSMSLGASYDAQQANIT | Negative |
| P26501 | AGVPAMPAHAAINSMSLGAS | Negative |
| P26501 | HAINSMSLGASYDAQQANI  | Negative |
| P26501 | GVPAMPAHAAINSMSLGASY | Negative |
| P26501 | AHAAINSMSLGASYDAQQAN | Negative |
| P26501 | AMPAHAAINSMSLGASYDAQ | Negative |
| P26501 | MPAHAAINSMSLGASYDAQQ | Negative |
| P26501 | PKILAALLGCAVLAVGPAMP | Negative |
| P26501 | AINSMSLGASYDAQQANITF | Negative |
| P26501 | INSMSLGASYDAQQANITFR | Negative |
| P26501 | AALLGCAVLAVGPAMPAHAA | Negative |
| P26501 | ILAALLGCAVLAVGPAMPAH | Negative |
| P26501 | ALLGCAVLAVGPAMPAHAAI | Negative |
| P26501 | PAHAAINSMSLGASYDAQQA | Negative |
| P26501 | VPAMPAHAAINSMSLGASYD | Negative |
| P26501 | CPKILAALLGCAVLAVGPAM | Negative |
| P26501 | LLGCAVLAVGPAMPAHAAIN | Negative |
| P26501 | NSMSLGASYDAQQANITFRV | Negative |
| P26514 | VGVLGTATALIAPPGAHAEE | Negative |
| P26514 | LLLALVVGVLGTATALIAPP | Negative |
| P26514 | IRVLLLALVVGVLGTATALI | Negative |
| P26514 | VRRSIRVLLLALVVGVLGTA | Negative |
| P26514 | LVVGVLGTATALIAPPGAHA | Negative |
| P26514 | RVLLLALVVGVLGTATALIA | Negative |
| P26514 | MGSYALPRSGVRRSIRVLLL | Negative |
| P26514 | ALPRSGVRRSIRVLLLALVV | Negative |
| P26514 | GVLGTATALIAPPGAHAEE  | Negative |
| P26514 | RSGVRRSIRVLLLALVVGVL | Negative |
| P26514 | TATALIAPPGAHAEESTLGA | Negative |
| P26514 | GTATALIAPPGAHAEESTLG | Negative |
| P26514 | SGVRRSIRVLLLALVVGVLG | Negative |
| P26514 | VLLLALVVGVLGTATALIAP | Negative |
| P26514 | SYALPRSGVRRSIRVLLLAL | Negative |
| P26514 | LPRSGVRRSIRVLLLALVVG | Negative |
| P26514 | GSYALPRSGVRRSIRVLLLA | Negative |
| P26514 | VVGVLGTATALIAPPGAHA  | Negative |

|        |                       |          |
|--------|-----------------------|----------|
| P26514 | GVERRSIRVLLLALVVGVLGT | Negative |
| P26514 | RRSIRVLLLALVVGVLGTAT  | Negative |
| P26514 | ATALIAPPGAHAHAESTLGAA | Negative |
| P26514 | YALPRSGVERRSIRVLLLALV | Negative |
| P26514 | ALVVGVLGTATALIAPPGAH  | Negative |
| P26514 | VLGTATALIAPPGAHAHAEST | Negative |
| P26514 | PRSGVERRSIRVLLLALVGV  | Negative |
| P26514 | LLALVVGVLGTATALIAPPG  | Negative |
| P26514 | RSIRVLLLALVVGVLGTATA  | Negative |
| P26514 | SIRVLLLALVVGVLGTATAL  | Negative |
| P26514 | LALVVGVLGTATALIAPPGA  | Negative |
| P26515 | GPVTLLVRSWAVALAALAA   | Negative |
| P26515 | RGPVTLLVRSWAVALAALA   | Negative |
| P26515 | AVALAALAALMLPGTAQADT  | Negative |
| P26515 | ALAALMLPGTAQADTVVTN   | Negative |
| P26515 | TLLVRSWAVALAALAALML   | Negative |
| P26515 | WAVALAALAALMLPGTAQAD  | Negative |
| P26515 | AWAVALAALAALMLPGTAQA  | Negative |
| P26515 | RRGPVTLLVRSWAVALAAL   | Negative |
| P26515 | NLLVQPRRRRRGPVTLLVRS  | Negative |
| P26515 | RRRGPTLLVRSWAVALAA    | Negative |
| P26515 | RSWAVALAALAALMLPGTA   | Negative |
| P26515 | RRRRGPVTLLVRSWAVALA   | Negative |
| P26515 | VALAALAALMLPGTAQADTV  | Negative |
| P26515 | VQPRRRRRGPVTLLVRSWA   | Negative |
| P26515 | MNLLVQPRRRRRGPVTLLVR  | Negative |
| P26515 | LVQPRRRRRGPVTLLVRSWA  | Negative |
| P26515 | QPRRRRRGPVTLLVRSWAV   | Negative |
| P26515 | LLVRSWAVALAALAALMLP   | Negative |
| P26515 | VTLLVRSWAVALAALAALM   | Negative |
| P26515 | LLVQPRRRRRGPVTLLVRS   | Negative |
| P26515 | RRRRRGPTLLVRSWAVAL    | Negative |
| P26515 | SAWAVALAALAALMLPGTAQ  | Negative |
| P26515 | AALAALMLPGTAQADTVVTT  | Negative |
| P26515 | VRSWAVALAALAALMLPGT   | Negative |
| P26515 | PRRRRRGPVTLLVRSWAVA   | Negative |
| P26515 | ALAALAALMLPGTAQADTVV  | Negative |
| P26515 | LVRSWAVALAALAALMLPG   | Negative |
| P26515 | LAALMLPGTAQADTVVTTNQ  | Negative |
| P26515 | PVTLLVRSWAVALAALAAL   | Negative |
| P26652 | RDLVAEACTCVPIHPQDAFC  | Negative |
| P26652 | CVPIHPQDAFCNSDIVIRAK  | Negative |
| P26652 | LRDLVAEACTCVPIHPQDAF  | Negative |
| P26652 | TCVPIHPQDAFCNSDIVIRA  | Negative |
| P26652 | PIHPQDAFCNSDIVIRAKVV  | Negative |
| P26652 | CSWSLRDLVAEACTCVPIHP  | Negative |

|        |                      |          |
|--------|----------------------|----------|
| P26652 | GFLAVFLCSWSLRDLVAEAC | Negative |
| P26652 | LAVFLCSWSLRDLVAEACTC | Negative |
| P26652 | SLRDLVAEACTCVPIHPQDA | Negative |
| P26652 | DLVAEACTCVPIHPQDAFCN | Negative |
| P26652 | VPIHPQDAFCNSDIVIRAKV | Negative |
| P26652 | AVFLCSWSLRDLVAEACTCV | Negative |
| P26652 | FLAVFLCSWSLRDLVAEACT | Negative |
| P26652 | MTAWLGFLAVFLCSWSLRDL | Negative |
| P26652 | WLGFLAVFLCSWSLRDLVAE | Negative |
| P26652 | EACTCVPIHPQDAFCNSDIV | Negative |
| P26652 | TAWLGFLAVFLCSWSLRDLV | Negative |
| P26652 | WSLRDLVAEACTCVPIHPQD | Negative |
| P26652 | ACTCVPIHPQDAFCNSDIVI | Negative |
| P26652 | LGFLAVFLCSWSLRDLVAEA | Negative |
| P26652 | CTCVPIHPQDAFCNSDIVIR | Negative |
| P26652 | FLCSWSLRDLVAEACTCVPI | Negative |
| P26652 | SWSLRDLVAEACTCVPIHPQ | Negative |
| P26652 | AEACTCVPIHPQDAFCNSDI | Negative |
| P26652 | IHPQDAFCNSDIVIRAKVVG | Negative |
| P26652 | LVAEACTCVPIHPQDAFCNS | Negative |
| P26652 | VAEACTCVPIHPQDAFCNSD | Negative |
| P26652 | LCSWSLRDLVAEACTCVPIH | Negative |
| P26652 | AWLGFLAVFLCSWSLRDLVA | Negative |
| P26729 | AVHTYCGRHLARTLADLCWE | Negative |
| P26729 | TVMWVSTQQPQAVHTYCGRH | Negative |
| P26729 | STQQPQAVHTYCGRHLARTL | Negative |
| P26729 | YCGRHLARTLADLCWEAGVD | Negative |
| P26729 | WVSTQQPQAVHTYCGRHLAR | Negative |
| P26729 | GRHLARTLADLCWEAGVDKR | Negative |
| P26729 | QQPQAVHTYCGRHLARTLAD | Negative |
| P26729 | MKILLAIALMLSTVMWVSTQ | Negative |
| P26729 | VSTQQPQAVHTYCGRHLART | Negative |
| P26729 | LMLSTVMWVSTQQPQAVHTY | Negative |
| P26729 | KILLAIALMLSTVMWVSTQQ | Negative |
| P26729 | TYCGRHLARTLADLCWEAGV | Negative |
| P26729 | AIALMLSTVMWVSTQQPQAV | Negative |
| P26729 | ALMLSTVMWVSTQQPQAVHT | Negative |
| P26729 | QPQAVHTYCGRHLARTLADL | Negative |
| P26729 | VHTYCGRHLARTLADLCWEA | Negative |
| P26729 | CGRHLARTLADLCWEAGVDK | Negative |
| P26729 | HTYCGRHLARTLADLCWEAG | Negative |
| P26729 | MLSTVMWVSTQQPQAVHTYC | Negative |
| P26729 | QAVHTYCGRHLARTLADLCW | Negative |
| P26729 | IALMLSTVMWVSTQQPQAVH | Negative |
| P26729 | PQAVHTYCGRHLARTLADLC | Negative |
| P26729 | LLAIALMLSTVMWVSTQQPQ | Negative |



|        |                      |          |
|--------|----------------------|----------|
| P26729 | LSTVMWVSTQQPQAVHTYCG | Negative |
| P26729 | STVMWVSTQQPQAVHTYCGR | Negative |
| P26729 | MWVSTQQPQAVHTYCGRHLA | Negative |
| P26729 | VMWVSTQQPQAVHTYCGRHL | Negative |
| P26729 | ILLAIALMLSTVMWVSTQQP | Negative |
| P26729 | TQQPQAVHTYCGRHLARTLA | Negative |
| P26730 | TQQPQAVHTYCGRHLARTLA | Negative |
| P26730 | VSTQQPQAVHTYCGRHLART | Negative |
| P26730 | HTYCGRHLARTLADLCWEAG | Negative |
| P26730 | WVSTQQPQAVHTYCGRHLAR | Negative |
| P26730 | VHTYCGRHLARTLADLCWEA | Negative |
| P26730 | ALMLTIVMWVSTQQPQAVHT | Negative |
| P26730 | LLAIALMLTIVMWVSTQQPQ | Negative |
| P26730 | LTIVMWVSTQQPQAVHTYCG | Negative |
| P26730 | IVMWVSTQQPQAVHTYCGRH | Negative |
| P26730 | TYCGRHLARTLADLCWEAGV | Negative |
| P26730 | AVHTYCGRHLARTLADLCWE | Negative |
| P26730 | MWVSTQQPQAVHTYCGRHLA | Negative |
| P26730 | IALMLTIVMWVSTQQPQAVH | Negative |
| P26730 | CGRHLARTLADLCWEAGVDK | Negative |
| P26730 | LLAIALMLTIVMWVSTQQP  | Negative |
| P26730 | QPQAVHTYCGRHLARTLADL | Negative |
| P26730 | AIALMLTIVMWVSTQQPQAV | Negative |
| P26730 | STQQPQAVHTYCGRHLARTL | Negative |
| P26730 | QAVHTYCGRHLARTLADLCW | Negative |
| P26730 | VMWVSTQQPQAVHTYCGRHL | Negative |
| P26730 | QQPQAVHTYCGRHLARTLAD | Negative |
| P26730 | MKLLAIALMLTIVMWVSTQ  | Negative |
| P26730 | KLLAIALMLTIVMWVSTQQ  | Negative |
| P26730 | LMLTIVMWVSTQQPQAVHTY | Negative |
| P26730 | MLTIVMWVSTQQPQAVHTYC | Negative |
| P26730 | PQAVHTYCGRHLARTLADLC | Negative |
| P26730 | GRHLARTLADLCWEAGVDKR | Negative |
| P26730 | YCGRHLARTLADLCWEAGVD | Negative |
| P26730 | TIVMWVSTQQPQAVHTYCGR | Negative |
| P26732 | TQQPQAVHTYCGRHLARTLA | Negative |
| P26732 | LLAIALMLTTVMWASTQQPQ | Negative |
| P26732 | MLTTVMWASTQQPQAVHTYC | Negative |
| P26732 | TYCGRHLARTLADLCWEAGV | Negative |
| P26732 | WASTQQPQAVHTYCGRHLAR | Negative |
| P26732 | LTTVMWASTQQPQAVHTYCG | Negative |
| P26732 | MWASTQQPQAVHTYCGRHLA | Negative |
| P26732 | VMWASTQQPQAVHTYCGRHL | Negative |
| P26732 | AVHTYCGRHLARTLADLCWE | Negative |
| P26732 | PQAVHTYCGRHLARTLADLC | Negative |
| P26732 | GRHLARTLADLCWEAGVDKR | Negative |

|        |                      |          |
|--------|----------------------|----------|
| P26732 | STQQPQAVHTYCGRHLARTL | Negative |
| P26732 | AIALMLTTVMWASTQQPQAV | Negative |
| P26732 | LMLTTVMWASTQQPQAVHTY | Negative |
| P26732 | HTYCGRHLARTLADLCWEAG | Negative |
| P26732 | QQPQAVHTYCGRHLARTLAD | Negative |
| P26732 | LLLAIALMLTTVMWASTQQP | Negative |
| P26732 | ALMLTTVMWASTQQPQAVHT | Negative |
| P26732 | KLLLAIALMLTTVMWASTQQ | Negative |
| P26732 | YCGRHLARTLADLCWEAGVD | Negative |
| P26732 | ASTQQPQAVHTYCGRHLART | Negative |
| P26732 | VHTYCGRHLARTLADLCWEA | Negative |
| P26732 | QPQAVHTYCGRHLARTLADL | Negative |
| P26732 | QAVHTYCGRHLARTLADLCW | Negative |
| P26732 | TTVMWASTQQPQAVHTYCGR | Negative |
| P26732 | MKLLLAIALMLTTVMWASTQ | Negative |
| P26732 | CGRHLARTLADLCWEAGVDK | Negative |
| P26732 | TVMWASTQQPQAVHTYCGRH | Negative |
| P26732 | IALMLTTVMWASTQQPQAVH | Negative |
| P26776 | LAAPSLALLSTATLVSGAW  | Negative |
| P26776 | RSCGGVLRDPPGKIFNSDGP | Negative |
| P26776 | LALLSTATLVSGAWNRRSR  | Negative |
| P26776 | TATLVSGAWNRRSRSCGGVL | Negative |
| P26776 | APSLALLSTATLVSGAWNR  | Negative |
| P26776 | MKLAAPSLALLSTATLVSG  | Negative |
| P26776 | ATLVSGAWNRRSRSCGGVLR | Negative |
| P26776 | LVSGAWNRRSRSCGGVLRDP | Negative |
| P26776 | GAWNRRSRSCGGVLRDPPGK | Negative |
| P26776 | STATLVSGAWNRRSRSCGGV | Negative |
| P26776 | TLVSGAWNRRSRSCGGVLRD | Negative |
| P26776 | CGGVLRDPPGKIFNSDGPQK | Negative |
| P26776 | SCGGVLRDPPGKIFNSDGPQ | Negative |
| P26776 | AWNRRSRSCGGVLRDPPGKI | Negative |
| P26776 | SRSCGGVLRDPPGKIFNSDG | Negative |
| P26776 | RSRSCGGVLRDPPGKIFNSD | Negative |
| P26776 | LLLSTATLVSGAWNRRSRSC | Negative |
| P26776 | AAPSLALLSTATLVSGAWN  | Negative |
| P26776 | RRSRSCGGVLRDPPGKIFNS | Negative |
| P26776 | KLAAPSLALLSTATLVSGA  | Negative |
| P26776 | WNRRSRSCGGVLRDPPGKIF | Negative |
| P26776 | ALLSTATLVSGAWNRRSR   | Negative |
| P26776 | GGVLRDPPGKIFNSDGPQKD | Negative |
| P26776 | VSGAWNRRSRSCGGVLRDPP | Negative |
| P26776 | LSTATLVSGAWNRRSRSCGG | Negative |
| P26776 | NRRSRSCGGVLRDPPGKIFN | Negative |
| P26776 | LLSTATLVSGAWNRRSRSCG | Negative |
| P26776 | SLALLSTATLVSGAWNRRS  | Negative |

|        |                      |          |
|--------|----------------------|----------|
| P26776 | SGAWNRRSRSCGGVLRDPPG | Negative |
| P26780 | MAMAKKSVSSFTLIFILVLV | Negative |
| P26780 | AMAKKSVSSFTLIFILVLVI | Negative |
| P26780 | LVLVIFEVPEIKAQDSECLK | Negative |
| P26780 | EVPEIKAQDSECLKEYGGDV | Negative |
| P26780 | FTLIFILVLVIFEVPEIKAQ | Negative |
| P26780 | FEVPEIKAQDSECLKEYGGD | Negative |
| P26780 | KSVSSFTLIFILVLVIFEVP | Negative |
| P26780 | LIFILVLVIFEVPEIKAQDS | Negative |
| P26780 | AQDSECLKEYGGDVGFPFCA | Negative |
| P26780 | QDSECLKEYGGDVGFPFCAP | Negative |
| P26780 | SFTLIFILVLVIFEVPEIKA | Negative |
| P26780 | VLVIFEVPEIKAQDSECLKE | Negative |
| P26780 | SSFTLIFILVLVIFEVPEIK | Negative |
| P26780 | FILVLVIFEVPEIKAQDSEC | Negative |
| P26780 | IFEVPEIKAQDSECLKEYGG | Negative |
| P26780 | EIKAQDSECLKEYGGDVGFP | Negative |
| P26780 | IFILVLVIFEVPEIKAQDSE | Negative |
| P26780 | KAQDSECLKEYGGDVGFPFC | Negative |
| P26780 | SVSSFTLIFILVLVIFEVPE | Negative |
| P26780 | KKSVSSFTLIFILVLVIFEV | Negative |
| P26780 | IKAQDSECLKEYGGDVGFPF | Negative |
| P26780 | VSSFTLIFILVLVIFEVPEI | Negative |
| P26780 | PEIKAQDSECLKEYGGDVG  | Negative |
| P26780 | TLIFILVLVIFEVPEIKAQD | Negative |
| P26780 | LVIFEVPEIKAQDSECLKEY | Negative |
| P26780 | MAKKSVSSFTLIFILVLVIF | Negative |
| P26780 | VPEIKAQDSECLKEYGGDVG | Negative |
| P26780 | AKKSVSSFTLIFILVLVIFE | Negative |
| P26780 | VIFEVPEIKAQDSECLKEYG | Negative |
| P26827 | KTFKLILVLMLSLTLVFGLT | Negative |
| P26827 | TFKLILVLMLSLTLVFGLTA | Negative |
| P26827 | GLTAPIQAASDTAVSNVVNY | Negative |
| P26827 | LILVLMLSLTLVFGLTAPIQ | Negative |
| P26827 | DTAVSNVVNYSTDVIYQIVT | Negative |
| P26827 | AASDTAVSNVVNYSTDVIYQ | Negative |
| P26827 | MKKTFKLILVLMLSLTLVFG | Negative |
| P26827 | ASDTAVSNVVNYSTDVIYQI | Negative |
| P26827 | VFGLTAPIQAASDTAVSNVV | Negative |
| P26827 | APIQAASDTAVSNVVNYSTD | Negative |
| P26827 | ILVLMLSLTLVFGLTAPIQA | Negative |
| P26827 | TLVFGLTAPIQAASDTAVSN | Negative |
| P26827 | KKTFKLILVLMLSLTLVFGL | Negative |
| P26827 | LVFGLTAPIQAASDTAVSNV | Negative |
| P26827 | KLILVLMLSLTLVFGLTAPI | Negative |
| P26827 | TAPIQAASDTAVSNVVNYST | Negative |

|        |                      |          |
|--------|----------------------|----------|
| P26827 | PIQAASDTAVSNVVNYSTDV | Negative |
| P26827 | LMLSLTLVFGLTAPIQAASD | Negative |
| P26827 | LTAPIQAASDTAVSNVVNYS | Negative |
| P26827 | LVLMLSLTLVFGLTAPIQAA | Negative |
| P26827 | IQAASDTAVSNVVNYSTDVI | Negative |
| P26827 | LTLVFGLTAPIQAASDTAVS | Negative |
| P26827 | VLMLSLTLVFGLTAPIQAAS | Negative |
| P26827 | QAASDTAVSNVVNYSTDVIY | Negative |
| P26827 | FGLTAPIQAASDTAVSNVVN | Negative |
| P26827 | MLSLTLVFGLTAPIQAASDT | Negative |
| P26827 | SDTAVSNVVNYSTDVIYQIV | Negative |
| P26827 | FKLILVLMLSLTLVFGLTAP | Negative |
| P26827 | SLTLVFGLTAPIQAASDTAV | Negative |
| P26877 | IGLASLAASPLIQASTYTQT | Negative |
| P26877 | ASLAASPLIQASTYTQTKYP | Negative |
| P26877 | PLIQASTYTQTKYPIVLAHG | Negative |
| P26877 | LIQASTYTQTKYPIVLAHGM | Negative |
| P26877 | ASTYTQTKYPIVLAHGMLGF | Negative |
| P26877 | LASLAASPLIQASTYTQTKY | Negative |
| P26877 | LLPLGLAIGLASLAASPLIQ | Negative |
| P26877 | SLLPLGLAIGLASLAASPLI | Negative |
| P26877 | AASPLIQASTYTQTKYPIVL | Negative |
| P26877 | KSLLPLGLAIGLASLAASPL | Negative |
| P26877 | LGLAIGLASLAASPLIQAST | Negative |
| P26877 | KKSLLPLGLAIGLASLAASP | Negative |
| P26877 | SPLIQASTYTQTKYPIVLAH | Negative |
| P26877 | IQASTYTQTKYPIVLAHGML | Negative |
| P26877 | TQTKYPIVLAHGMLGFDNIL | Negative |
| P26877 | TYTQTKYPIVLAHGMLGFDN | Negative |
| P26877 | PLGLAIGLASLAASPLIQAS | Negative |
| P26877 | STYTQTKYPIVLAHGMLGFD | Negative |
| P26877 | LPLGLAIGLASLAASPLIQA | Negative |
| P26877 | GLAIGLASLAASPLIQASTY | Negative |
| P26877 | ASPLIQASTYTQTKYPIVLA | Negative |
| P26877 | SLAASPLIQASTYTQTKYPI | Negative |
| P26877 | LAASPLIQASTYTQTKYPIV | Negative |
| P26877 | KKKSLLPLGLAIGLASLAAS | Negative |
| P26877 | LAIGLASLAASPLIQASTYT | Negative |
| P26877 | MKKKSLLPLGLAIGLASLAA | Negative |
| P26877 | YTQTKYPIVLAHGMLGFDNI | Negative |
| P26877 | QASTYTQTKYPIVLAHGMLG | Negative |
| P26877 | GLASLAASPLIQASTYTQTK | Negative |
| P26894 | LAVFLLSAALCEAAVLARVS | Negative |
| P26894 | RVSAELRCQCINTHSTPFHP | Negative |
| P26894 | AALCEAAVLARVSAELRCQC | Negative |
| P26894 | LCEAAVLARVSAELRCQCIN | Negative |

|        |                       |          |
|--------|-----------------------|----------|
| P26894 | AELRCQCINTHSTPFHPKFI  | Negative |
| P26894 | SAELRCQCINTHSTPFHPKF  | Negative |
| P26894 | VFLLSAALCEAAVLARVSAE  | Negative |
| P26894 | AVLARVSAELRCQCINTHST  | Negative |
| P26894 | KLAVAF LAVFLLSAALCEAA | Negative |
| P26894 | LARVSAELRCQCINTHSTPF  | Negative |
| P26894 | LSAALCEAAVLARVSAELRC  | Negative |
| P26894 | SKLAVAF LAVFLLSAALCEA | Negative |
| P26894 | EAAVLARVSAELRCQCINTH  | Negative |
| P26894 | LLSAALCEAAVLARVSAELR  | Negative |
| P26894 | AAVLARVSAELRCQCINTHS  | Negative |
| P26894 | AFLAVFLLSAALCEAAVLAR  | Negative |
| P26894 | TSKLAVAF LAVFLLSAALCE | Negative |
| P26894 | VSAELRCQCINTHSTPFHPK  | Negative |
| P26894 | AVAFLAVFLLSAALCEAAVL  | Negative |
| P26894 | FLLSAALCEAAVLARVSAEL  | Negative |
| P26894 | SAALCEAAVLARVSAELRCQ  | Negative |
| P26894 | VLARVSAELRCQCINTHSTP  | Negative |
| P26894 | MTSKLAVAF LAVFLLSAALC | Negative |
| P26894 | CEAAVLARVSAELRCQCINT  | Negative |
| P26894 | FLAVFLLSAALCEAAVLARV  | Negative |
| P26894 | ARVSAELRCQCINTHSTPFH  | Negative |
| P26894 | ALCEAAVLARVSAELRCQCI  | Negative |
| P26894 | LAVAF LAVFLLSAALCEAAV | Negative |
| P26894 | VAF LAVFLLSAALCEAAVLA | Negative |
| P27032 | RCWALMLMVWFSASATAANG  | Negative |
| P27032 | GKPMWRCWALMLMVWFSASA  | Negative |
| P27032 | WFSASATAANGWEIYKSRFM  | Negative |
| P27032 | SATAANGWEIYKSRFMTTDG  | Negative |
| P27032 | TAANGWEIYKSRFMTTDGRI  | Negative |
| P27032 | VWFSASATAANGWEIYKSRF  | Negative |
| P27032 | KPMWRCWALMLMVWFSASAT  | Negative |
| P27032 | ANGWEIYKSRFMTTDGRIQD  | Negative |
| P27032 | WRCWALMLMVWFSASATAAN  | Negative |
| P27032 | PMWRCWALMLMVWFSASATA  | Negative |
| P27032 | IYKSRFMTTDGRIQDTGNKN  | Negative |
| P27032 | ASATAANGWEIYKSRFMTTD  | Negative |
| P27032 | GWEIYKSRFMTTDGRIQDTG  | Negative |
| P27032 | ALMLMVWFSASATAANGWEI  | Negative |
| P27032 | LMVWFSASATAANGWEIYKS  | Negative |
| P27032 | EIYKSRFMTTDGRIQDTGNK  | Negative |
| P27032 | MLMVWFSASATAANGWEIYK  | Negative |
| P27032 | MVWFSASATAANGWEIYKSR  | Negative |
| P27032 | WEIYKSRFMTTDGRIQDTGN  | Negative |
| P27032 | ATAANGWEIYKSRFMTTDGR  | Negative |
| P27032 | SASATAANGWEIYKSRFMTT  | Negative |

|        |                       |          |
|--------|-----------------------|----------|
| P27032 | MGKPMWRCWALMLMVWFSAS  | Negative |
| P27032 | CWALMLMVWFSASATAANGW  | Negative |
| P27032 | AANGWEIYKSRFMTTDGRIQ  | Negative |
| P27032 | NGWEIYKSRFMTTDGRIQDT  | Negative |
| P27032 | LMLMVWFSASATAANGWEIY  | Negative |
| P27032 | FSASATAANGWEIYKSRFMT  | Negative |
| P27032 | YKSRFMTTDGRIQDTGNKNV  | Negative |
| P27032 | MWRCWALMLMVWFSASATAA  | Negative |
| P27033 | PSKRYPASFKRAGSILGVSI  | Negative |
| P27033 | ILGVSIALLAAFSNVAAAGCE | Negative |
| P27033 | KRYPASFKRAGSILGVSI    | Negative |
| P27033 | TSPSKRYPASFKRAGSILGV  | Negative |
| P27033 | MGHVTSPSKRYPASFKRAGS  | Negative |
| P27033 | IALAAFSNVAAAGCEYVVTN  | Negative |
| P27033 | RYPASFKRAGSILGVSI     | Negative |
| P27033 | VSIALLAAFSNVAAAGCEYVV | Negative |
| P27033 | SFKRAGSILGVSIALLAAFSN | Negative |
| P27033 | AGSILGVSIALLAAFSNVAAA | Negative |
| P27033 | LAAFSNVAAAGCEYVVTNSW  | Negative |
| P27033 | ALAAFSNVAAAGCEYVVTNS  | Negative |
| P27033 | SPSKRYPASFKRAGSILGVS  | Negative |
| P27033 | GHVTSPSKRYPASFKRAGSI  | Negative |
| P27033 | YPASFKRAGSILGVSI      | Negative |
| P27033 | HVTSPSKRYPASFKRAGSIL  | Negative |
| P27033 | SKRYPASFKRAGSILGVSI   | Negative |
| P27033 | PASFKRAGSILGVSI       | Negative |
| P27033 | GSILGVSIALLAAFSNVAAAG | Negative |
| P27033 | AAFSNVAAAGCEYVVTNSWG  | Negative |
| P27033 | SIALAAFSNVAAAGCEYVVT  | Negative |
| P27033 | KRAGSILGVSIALLAAFSNVA | Negative |
| P27033 | SILGVSIALLAAFSNVAAAGC | Negative |
| P27033 | RAGSILGVSIALLAAFSNVAA | Negative |
| P27033 | VTSPSKRYPASFKRAGSILG  | Negative |
| P27033 | FKRAGSILGVSIALLAAFSNV | Negative |
| P27033 | LGVSIALAAFSNVAAAGCEY  | Negative |
| P27033 | ASFKRAGSILGVSI        | Negative |
| P27033 | AFSNVAAAGCEYVVTNSWGS  | Negative |
| P27035 | VGLTALAGPPAQAATGCKAE  | Negative |
| P27035 | AQAATGCKAEYTITSQWEGG  | Negative |
| P27035 | VSIVGLTALAGPPAQAATGC  | Negative |
| P27035 | LLALLATGVSIVGLTALAGP  | Negative |
| P27035 | TGCKAEYTITSQWEGGFQAG  | Negative |
| P27035 | TGVSIVGLTALAGPPAQAAT  | Negative |
| P27035 | KRLLALLATGVSIVGLTALA  | Negative |
| P27035 | AGPPAQAATGCKAEYTITSQ  | Negative |
| P27035 | ATGVSIVGLTALAGPPAQAA  | Negative |

|        |                      |          |
|--------|----------------------|----------|
| P27035 | ATGCKAEYTITSQWEGGFQA | Negative |
| P27035 | LLATGVSIVGLTALAGPPAQ | Negative |
| P27035 | GCKAEYTITSQWEGGFQAGV | Negative |
| P27035 | GVSIVGLTALAGPPAQAATG | Negative |
| P27035 | PAQAATGCKAEYTITSQWEG | Negative |
| P27035 | LATGVSIVGLTALAGPPAQA | Negative |
| P27035 | ALLATGVSIVGLTALAGPPA | Negative |
| P27035 | PPAQAATGCKAEYTITSQWE | Negative |
| P27035 | LTALAGPPAQAATGCKAEYT | Negative |
| P27035 | AATGCKAEYTITSQWEGGFQ | Negative |
| P27035 | RLLALLATGVSIVGLTALAG | Negative |
| P27035 | MKRLALLATGVSIVGLTAL  | Negative |
| P27035 | TALAGPPAQAATGCKAEYTI | Negative |
| P27035 | GPPAQAATGCKAEYTITSQW | Negative |
| P27035 | IVGLTALAGPPAQAATGCKA | Negative |
| P27035 | GLTALAGPPAQAATGCKAEY | Negative |
| P27035 | QAATGCKAEYTITSQWEGGF | Negative |
| P27035 | LAGPPAQAATGCKAEYTITS | Negative |
| P27035 | LALLATGVSIVGLTALAGPP | Negative |
| P27035 | ALAGPPAQAATGCKAEYTIT | Negative |
| P27050 | ADAAAQWQAGTAYKQGDVLT | Negative |
| P27050 | ALAFILIITWFAPRADAAAQ | Negative |
| P27050 | PRADAAAQWQAGTAYKQGDV | Negative |
| P27050 | ILIITWFAPRADAAAQWQAG | Negative |
| P27050 | TWFAPRADAAAQWQAGTAYK | Negative |
| P27050 | TFALAFILIITWFAPRADAA | Negative |
| P27050 | ITFALAFILIITWFAPRADA | Negative |
| P27050 | PVITFALAFILIITWFAPRA | Negative |
| P27050 | VITFALAFILIITWFAPRAD | Negative |
| P27050 | ITWFAPRADAAAQWQAGTAY | Negative |
| P27050 | QAVRFRPVITFALAFILIIT | Negative |
| P27050 | MNQAVRFRPVITFALAFILI | Negative |
| P27050 | VRFRPVITFALAFILIITWF | Negative |
| P27050 | IITWFAPRADAAAQWQAGTA | Negative |
| P27050 | RPVITFALAFILIITWFAPR | Negative |
| P27050 | RADAAAQWQAGTAYKQGDV  | Negative |
| P27050 | AVRFRPVITFALAFILIITW | Negative |
| P27050 | FAPRADAAAQWQAGTAYKQG | Negative |
| P27050 | RFRPVITFALAFILIITWFA | Negative |
| P27050 | LAFILIITWFAPRADAAAQW | Negative |
| P27050 | NQAVRFRPVITFALAFILII | Negative |
| P27050 | DAAAQWQAGTAYKQGDVITY | Negative |
| P27050 | WFAPRADAAAQWQAGTAYKQ | Negative |
| P27050 | FALAFILIITWFAPRADAAA | Negative |
| P27050 | FRPVITFALAFILIITWFAP | Negative |
| P27050 | FILIITWFAPRADAAAQWQA | Negative |

|        |                      |          |
|--------|----------------------|----------|
| P27050 | APRADAAAQWQAGTAYKQGD | Negative |
| P27050 | LIITWFAPRADAAAQWQAGT | Negative |
| P27050 | AAAQWQAGTAYKQGDLVTYL | Negative |
| P27177 | AACTDVALSKKGKGPSGGG  | Negative |
| P27177 | SKKGKGPSGGGWGAGSHRQ  | Negative |
| P27177 | CCLLALLLAACDVALSKKG  | Negative |
| P27177 | CTDVALSKKGKGPSGGGWG  | Negative |
| P27177 | RLLTTCCLLALLLAACDVA  | Negative |
| P27177 | LLAACDVALSKKGKGPSG   | Negative |
| P27177 | VALSKKGKGPSGGGWGAGS  | Negative |
| P27177 | MARLLTTCCLLALLLAACD  | Negative |
| P27177 | LLLAACDVALSKKGKGPS   | Negative |
| P27177 | ARLLTTCCLLALLLAACDV  | Negative |
| P27177 | ACDVALSKKGKGPSGGGW   | Negative |
| P27177 | DVALSKKGKGPSGGGWGAG  | Negative |
| P27177 | TTCCLLALLLAACDVALSK  | Negative |
| P27177 | LTTCCLLALLLAACDVALS  | Negative |
| P27177 | ALLLAACDVALSKKGKGP   | Negative |
| P27177 | GKPSGGGWGAGSHRQPSYPR | Negative |
| P27177 | GKGKPSGGGWGAGSHRQPSY | Negative |
| P27177 | TDVALSKKGKGPSGGGWGA  | Negative |
| P27177 | KKGKGPSGGGWGAGSHRQPS | Negative |
| P27177 | ALSKKGKGPSGGGWGAGSH  | Negative |
| P27177 | KKGPSGGGWGAGSHRQPSYP | Negative |
| P27177 | LALLLAACDVALSKKGKKGK | Negative |
| P27177 | LAACDVALSKKGKGPSGG   | Negative |
| P27177 | KKGKGPSGGGWGAGSHRQP  | Negative |
| P27177 | KPSGGGWGAGSHRQPSYPRQ | Negative |
| P27177 | CLLALLLAACDVALSKKGK  | Negative |
| P27177 | LLTTCCLLALLLAACDVAL  | Negative |
| P27177 | LSKKGKGPSGGGWGAGSHR  | Negative |
| P27177 | TCCLLALLLAACDVALSKK  | Negative |
| P27274 | VLCSTGVSLRCYNCLDPVSS | Negative |
| P27274 | DPVSSCKTNSTCSPNLDA   | Negative |
| P27274 | LAVLCSTGVSLRCYNCLDPV | Negative |
| P27274 | LLLAVLCSTGVSLRCYNCL  | Negative |
| P27274 | CSTGVSLRCYNCLDPVSSCK | Negative |
| P27274 | GVSLRCYNCLDPVSSCKTNS | Negative |
| P27274 | STGVSLRCYNCLDPVSSCKT | Negative |
| P27274 | RRGFILLLLAVLCSTGVSL  | Negative |
| P27274 | LLAVLCSTGVSLRCYNCLDP | Negative |
| P27274 | LCSTGVSLRCYNCLDPVSSC | Negative |
| P27274 | RARRGFILLLLAVLCSTGV  | Negative |
| P27274 | LDPVSSCKTNSTCSPNLDA  | Negative |
| P27274 | LLLAVLCSTGVSLRCYNCLD | Negative |
| P27274 | LLLLAVLCSTGVSLRCYNCL | Negative |



|        |                       |          |
|--------|-----------------------|----------|
| P27274 | TGVSLRCYNCLDPVSSCKTN  | Negative |
| P27274 | VSLRCYNCLDPVSSCKTNST  | Negative |
| P27274 | RGFILLLLLAVLCSTGVSLR  | Negative |
| P27274 | YNCLDPVSSCKTNSTCSPNL  | Negative |
| P27274 | RCYNCLDPVSSCKTNSTCSP  | Negative |
| P27274 | SLRCYNCLDPVSSCKTNSTC  | Negative |
| P27274 | CYNCLDPVSSCKTNSTCSPN  | Negative |
| P27274 | AVLCSTGVSLRCYNCLDPVS  | Negative |
| P27274 | NCLDPVSSCKTNSTCSPNLD  | Negative |
| P27274 | CLDPVSSCKTNSTCSPNLDA  | Negative |
| P27274 | GFILLLLLAVLCSTGVSLRC  | Negative |
| P27274 | ARRGFILLLLLAVLCSTGVS  | Negative |
| P27274 | FILLLLLAVLCSTGVSLRCY  | Negative |
| P27274 | LRCYNCLDPVSSCKTNSTCS  | Negative |
| P27274 | MRARRGFILLLLLAVLCSTG  | Negative |
| P27275 | IVMMAFMMVDPSMGVGECVR  | Negative |
| P27275 | VRGRCPSGMCCSQFGYCGKG  | Negative |
| P27275 | NMKCV ALIVIVMMAFMMVDP | Negative |
| P27275 | VMMAFMMVDPSMGVGECVRG  | Negative |
| P27275 | ALIVIVMMAFMMVDPSMGVG  | Negative |
| P27275 | VALIVIVMMAFMMVDPSMGV  | Negative |
| P27275 | SMGVGECVRGRCPSGMCCSQ  | Negative |
| P27275 | LIVIVMMAFMMVDPSMGVGE  | Negative |
| P27275 | DPSMGVGECVRGRCPSGMCC  | Negative |
| P27275 | IVIVMMAFMMVDPSMGVGEC  | Negative |
| P27275 | FMMVDPSMGVGECVRGRCP   | Negative |
| P27275 | MVDPSMGVGECVRGRCPSGM  | Negative |
| P27275 | MMAFMMVDPSMGVGECVRGR  | Negative |
| P27275 | VDPSMGVGECVRGRCPSGMC  | Negative |
| P27275 | CVRGRCPSGMCCSQFGYCGK  | Negative |
| P27275 | GECVRGRCPSGMCCSQFGYC  | Negative |
| P27275 | GVGECVRGRCPSGMCCSQFG  | Negative |
| P27275 | MVNMKCVALIVIVMMAFMMV  | Negative |
| P27275 | VGECVRGRCPSGMCCSQFGY  | Negative |
| P27275 | MGVGECVRGRCPSGMCCSQF  | Negative |
| P27275 | AFMMVDPSMGVGECVRGRCP  | Negative |
| P27275 | MAFMMVDPSMGVGECVRGR   | Negative |
| P27275 | PSMGVGECVRGRCPSGMCCS  | Negative |
| P27275 | KCVALIVIVMMAFMMVDPSM  | Negative |
| P27275 | MKCVALIVIVMMAFMMVDPS  | Negative |
| P27275 | MMVDPSMGVGECVRGRCPSG  | Negative |
| P27275 | VNMKCVALIVIVMMAFMMVD  | Negative |
| P27275 | CVALIVIVMMAFMMVDPSMG  | Negative |
| P27275 | ECVRGRCPSGMCCSQFGYCG  | Negative |
| P27373 | LIVISMSGIAGAAEVKNLNT  | Negative |
| P27373 | LLMLLLIVISMSGIAGAAEV  | Negative |

|        |                      |          |
|--------|----------------------|----------|
| P27373 | NLNTSKTFTKIQEAIDDPST | Negative |
| P27373 | LLLIVISMSGIAGAAEVKNL | Negative |
| P27373 | GIAGAAEVKNLNTSKTFTKI | Negative |
| P27373 | MSGIAGAAEVKNLNTSKTFT | Negative |
| P27373 | IVISMSGIAGAAEVKNLNTS | Negative |
| P27373 | IAGAAEVKNLNTSKTFTKIQ | Negative |
| P27373 | TSKTFTKIQEAIDDPSTTDG | Negative |
| P27373 | TLLMLLLIVISMSGIAGAAE | Negative |
| P27373 | SMSGIAGAAEVKNLNTSKTF | Negative |
| P27373 | LMLLLIVISMSGIAGAAEVK | Negative |
| P27373 | SGIAGAAEVKNLNTSKTFTK | Negative |
| P27373 | GAAEVKNLNTSKTFTKIQEA | Negative |
| P27373 | KNLNTSKTFTKIQEAIDDP  | Negative |
| P27373 | KFTLLMLLLIVISMSGIAGA | Negative |
| P27373 | AEVKNLNTSKTFTKIQEAID | Negative |
| P27373 | AAEVKNLNTSKTFTKIQEAI | Negative |
| P27373 | LLIVISMSGIAGAAEVKNLN | Negative |
| P27373 | FTLLMLLLIVISMSGIAGAA | Negative |
| P27373 | NTSKTFTKIQEAIDDPSTTD | Negative |
| P27373 | RKFTLLMLLLIVISMSGIAG | Negative |
| P27373 | MRKFTLLMLLLIVISMSGIA | Negative |
| P27373 | VISMSGIAGAAEVKNLNTSK | Negative |
| P27373 | LNTSKTFTKIQEAIDDPSTT | Negative |
| P27373 | ISMSGIAGAAEVKNLNTSKT | Negative |
| P27373 | VKNLNTSKTFTKIQEAIDDP | Negative |
| P27373 | AGAAEVKNLNTSKTFTKIQE | Negative |
| P27373 | EVKNLNTSKTFTKIQEAIDD | Negative |
| P27477 | SLVVAVLLAVPGWLTPATAA | Negative |
| P27477 | LAVISLVVAVLLAVPGWLTP | Negative |
| P27477 | RSLRWPRQKAFLAVISLVVA | Negative |
| P27477 | LAVPGWLTPATAASQATVQF | Negative |
| P27477 | PRQKAFLAVISLVVAVLLAV | Negative |
| P27477 | KAFLAVISLVVAVLLAVPGW | Negative |
| P27477 | GWLTPATAASQATVQFVAPT | Negative |
| P27477 | AVISLVVAVLLAVPGWLTPA | Negative |
| P27477 | VLLAVPGWLTPATAASQATV | Negative |
| P27477 | AVPGWLTPATAASQATVQFV | Negative |
| P27477 | PGWLTPATAASQATVQFVAP | Negative |
| P27477 | VPGWLTPATAASQATVQFVA | Negative |
| P27477 | SVRSLRWPRQKAFLAVISLV | Negative |
| P27477 | WPRQKAFLAVISLVVAVLLA | Negative |
| P27477 | VRSLRWPRQKAFLAVISLVV | Negative |
| P27477 | VVAVLLAVPGWLTPATAASQ | Negative |
| P27477 | RWPRQKAFLAVISLVVAVLL | Negative |
| P27477 | VISLVVAVLLAVPGWLTPAT | Negative |
| P27477 | SLRWPRQKAFLAVISLVVAV | Negative |

|        |                      |          |
|--------|----------------------|----------|
| P27477 | LVVAVLLAVPGWLTPATAAS | Negative |
| P27477 | FLAVISLVVAVLLAVPGWLT | Negative |
| P27477 | QKAFLAVISLVVAVLLAVPG | Negative |
| P27477 | RQKAFLAVISLVVAVLLAVP | Negative |
| P27477 | VAVLLAVPGWLTPATAASQA | Negative |
| P27477 | LRWPRQKAFLAVISLVVAVL | Negative |
| P27477 | LLAVPGWLTPATAASQATVQ | Negative |
| P27477 | ISLVVAVLLAVPGWLTPATA | Negative |
| P27477 | MSVRSLRWPRQKAFLAVISL | Negative |
| P27477 | AFLAVISLVVAVLLAVPGWL | Negative |
| P27485 | RVKENFDKARFSGTWYAMAK | Negative |
| P27485 | FRVKENFDKARFSGTWYAMA | Negative |
| P27485 | MEVWVALVLLAALGSAQAER | Negative |
| P27485 | ALGSAQAERDCRVSSFRVKE | Negative |
| P27485 | RDCRVSSFRVKENFDKARFS | Negative |
| P27485 | VKENFDKARFSGTWYAMAKK | Negative |
| P27485 | LAALGSAQAERDCRVSSFRV | Negative |
| P27485 | SSFRVKENFDKARFSGTWYA | Negative |
| P27485 | WWVALVLLAALGSAQAERDC | Negative |
| P27485 | VSSFRVKENFDKARFSGTWY | Negative |
| P27485 | LVLLAALGSAQAERDCRVSS | Negative |
| P27485 | AQAERDCRVSSFRVKENFDK | Negative |
| P27485 | QAERDCRVSSFRVKENFDKA | Negative |
| P27485 | RVSSFRVKENFDKARFSGTW | Negative |
| P27485 | ERDCRVSSFRVKENFDKARF | Negative |
| P27485 | KENFDKARFSGTWYAMAKKD | Negative |
| P27485 | ALVLLAALGSAQAERDCRV  | Negative |
| P27485 | GSAQAERDCRVSSFRVKENF | Negative |
| P27485 | AERDCRVSSFRVKENFDKAR | Negative |
| P27485 | SFRVKENFDKARFSGTWYAM | Negative |
| P27485 | EWVVALVLLAALGSAQAERD | Negative |
| P27485 | DCRVSSFRVKENFDKARFSG | Negative |
| P27485 | LLAALGSAQAERDCRVSSFR | Negative |
| P27485 | CRVSSFRVKENFDKARFSGT | Negative |
| P27485 | AALGSAQAERDCRVSSFRVK | Negative |
| P27485 | SAQAERDCRVSSFRVKENFD | Negative |
| P27485 | LGSAQAERDCRVSSFRVKEN | Negative |
| P27485 | WALVLLAALGSAQAERDCRV | Negative |
| P27485 | VLLAALGSAQAERDCRVSSF | Negative |
| P27654 | TAEIQAIIGDINSHLSYLG  | Negative |
| P27654 | LSAIASLAVADTSAETAEL  | Negative |
| P27654 | LQAIIGDINSHLSYLGLET  | Negative |
| P27654 | AAETAELQAIIGDINSHLS  | Negative |
| P27654 | QAIIGDINSHLSYLGLETG  | Negative |
| P27654 | AVADTSAETAELQAIIGDI  | Negative |
| P27654 | TSAAETAELQAIIGDINSHL | Negative |

|        |                        |          |
|--------|------------------------|----------|
| P27654 | VADTSAAETAELQAIIGDIN   | Negative |
| P27654 | AFVLSAIASLAVADTSAAET   | Negative |
| P27654 | SVSKIAFVLSAIASLAVADT   | Negative |
| P27654 | AIASLAVADTSAAETAELQA   | Negative |
| P27654 | VLSAIASLAVADTSAAETAELQ | Negative |
| P27654 | SAIASLAVADTSAAETAELQ   | Negative |
| P27654 | AELQAIIGDINSHLS DYLG L | Negative |
| P27654 | MSVSKIAFVLSAIASLAVAD   | Negative |
| P27654 | IAFVLSAIASLAVADTSAAE   | Negative |
| P27654 | ELQAIIGDINSHLS DYLG L  | Negative |
| P27654 | ADTSAAETAELQAIIGDINS   | Negative |
| P27654 | ETAELQAIIGDINSHLS DYL  | Negative |
| P27654 | SLAVADTSAAETAELQAIIG   | Negative |
| P27654 | VSKIAFVLSAIASLAVADTS   | Negative |
| P27654 | SKIAFVLSAIASLAVADTSA   | Negative |
| P27654 | AETAELQAIIGDINSHLS DY  | Negative |
| P27654 | SAAETAELQAIIGDINSHLS   | Negative |
| P27654 | ASLAVADTSAAETAELQAI    | Negative |
| P27654 | DTSAETAELQAIIGDINSH    | Negative |
| P27654 | LAVADTSAAETAELQAIIGD   | Negative |
| P27654 | FVLSAIASLAVADTSAAETA   | Negative |
| P27654 | IASLAVADTSAAETAELQAI   | Negative |
| P27657 | FSDDAPWSGTIDRPLKALPW   | Negative |
| P27657 | VLLGAVAGKEVCFDKLGCF    | Negative |
| P27657 | KLGCFSDDAPWSGTIDRPLK   | Negative |
| P27657 | GKEVCFDKLGCFSDAPWSG    | Negative |
| P27657 | GCFSDAPWSGTIDRPLKAL    | Negative |
| P27657 | AGKEVCFDKLGCFSDAPWS    | Negative |
| P27657 | DDAPWSGTIDRPLKALPWSP   | Negative |
| P27657 | LGCFSDDAPWSGTIDRPLKA   | Negative |
| P27657 | MLMLWTFVLLGAVAGKEVC    | Negative |
| P27657 | WTFVLLGAVAGKEVCFDKL    | Negative |
| P27657 | LLGAVAGKEVCFDKLGCFSD   | Negative |
| P27657 | VAGKEVCFDKLGCFSDAPW    | Negative |
| P27657 | VCFDKLGCFSDAPWSGTID    | Negative |
| P27657 | DAPWSGTIDRPLKALPWSPA   | Negative |
| P27657 | KEVCFDKLGCFSDAPWSGT    | Negative |
| P27657 | AVLLGAVAGKEVCFDKLGCF   | Negative |
| P27657 | SDDAPWSGTIDRPLKALPWS   | Negative |
| P27657 | EVCFDKLGCFSDAPWSGTI    | Negative |
| P27657 | TFAVLLGAVAGKEVCFDKLG   | Negative |
| P27657 | AVAGKEVCFDKLGCFSDAP    | Negative |
| P27657 | FAVLLGAVAGKEVCFDKLGC   | Negative |
| P27657 | MLWTFVLLGAVAGKEVCFD    | Negative |
| P27657 | CFSDAPWSGTIDRPLKALP    | Negative |
| P27657 | LWTFVLLGAVAGKEVCFDK    | Negative |

|        |                        |          |
|--------|------------------------|----------|
| P27657 | DKLGCFSDDAPWSGTIDRPL   | Negative |
| P27657 | CFDKLGCFSDDAPWSGTIDR   | Negative |
| P27657 | FDKLGCFSDDAPWSGTIDRP   | Negative |
| P27657 | LGAVAGKEVCFDKLGCFSDD   | Negative |
| P27657 | GAVAGKEVCFDKLGCFSDDA   | Negative |
| P27731 | LVFLAGLVFLSEAAPLVSHG   | Negative |
| P27731 | SHGSVDSKCPLMVKVLD AVR  | Negative |
| P27731 | LSEAAPLVSHGSVDSKCPLM   | Negative |
| P27731 | VDSKCPLMVKVLD AVR GSPA | Negative |
| P27731 | VFLAGLVFLSEAAPLVSHGS   | Negative |
| P27731 | EAAPLVSHGSVDSKCPLMVK   | Negative |
| P27731 | FHSTLLVFLAGLVFLSEAAP   | Negative |
| P27731 | AFHSTLLVFLAGLVFLSEAA   | Negative |
| P27731 | FLSEAAPLVSHGSVDSKCPL   | Negative |
| P27731 | VSHGSVDSKCPLMVKVLD AV  | Negative |
| P27731 | MAFHSTLLVFLAGLVFLSEA   | Negative |
| P27731 | DSKCPLMVKVLD AVR GSPAA | Negative |
| P27731 | APLVSHGSVDSKCPLMVKVL   | Negative |
| P27731 | LLVFLAGLVFLSEAAPLVSH   | Negative |
| P27731 | AAPLVSHGSVDSKCPLMVKV   | Negative |
| P27731 | VFLSEAAPLVSHGSVDSKCP   | Negative |
| P27731 | HSTLLVFLAGLVFLSEAAPL   | Negative |
| P27731 | HGSVDSKCPLMVKVLD AVR G | Negative |
| P27731 | FLAGLVFLSEAAPLVSHGSV   | Negative |
| P27731 | STLLVFLAGLVFLSEAAPLV   | Negative |
| P27731 | PLVSHGSVDSKCPLMVKVLD   | Negative |
| P27731 | SEAAPLVSHGSVDSKCPLMV   | Negative |
| P27731 | GLVFLSEAAPLVSHGSVDSK   | Negative |
| P27731 | LVFLSEAAPLVSHGSVDSKC   | Negative |
| P27731 | GSVDSKCPLMVKVLD AVR GS | Negative |
| P27731 | SVDSKCPLMVKVLD AVR GSP | Negative |
| P27731 | LAGLVFLSEAAPLVSHGSVD   | Negative |
| P27731 | LVSHGSVDSKCPLMVKVLD A  | Negative |
| P27731 | AGLVFLSEAAPLVSHGSVDS   | Negative |
| P27773 | ARLAAASDVLELTDENFESR   | Negative |
| P27773 | CLALLPGVALLLASARLAAA   | Negative |
| P27773 | FSC LALLPGVALLLASARLA  | Negative |
| P27773 | LPGVALLLASARLAAASDVL   | Negative |
| P27773 | SCLALLPGVALLLASARLAA   | Negative |
| P27773 | LALLPGVALLLASARLAAAS   | Negative |
| P27773 | LLLASARLAAASDVLELTD E  | Negative |
| P27773 | LAAASDVLELTDENFESRVS   | Negative |
| P27773 | ALLLASARLAAASDVLELTD   | Negative |
| P27773 | MRFSCLALLPGVALLLASAR   | Negative |
| P27773 | LASARLAAASDVLELTDENF   | Negative |
| P27773 | RFSC LALLPGVALLLASARL  | Negative |

|        |                       |          |
|--------|-----------------------|----------|
| P27773 | RLAAASDVLELTDENFESRV  | Negative |
| P27773 | AASDVLELTDENFESRVSDT  | Negative |
| P27773 | LLASARLAAASDVLELTDEN  | Negative |
| P27773 | GVALLLASARLAAASDVLEL  | Negative |
| P27773 | ASDVLELTDENFESRVSDTG  | Negative |
| P27773 | LLPGVALLLASARLAAASDV  | Negative |
| P27773 | DVLELTDENFESRVSDTGSA  | Negative |
| P27773 | SDVLELTDENFESRVSDTGS  | Negative |
| P27773 | VALLLASARLAAASDVLELT  | Negative |
| P27773 | LELTDENFESRVSDTGSAGL  | Negative |
| P27773 | ALLPGVALLLASARLAAASD  | Negative |
| P27773 | AAASDVLELTDENFESRVSD  | Negative |
| P27773 | ELTDENFESRVSDTGSAGLM  | Negative |
| P27773 | ASARLAAASDVLELTDENFE  | Negative |
| P27773 | SARLAAASDVLELTDENFES  | Negative |
| P27773 | LTDENFESRVSDTGSAGLML  | Negative |
| P27773 | VLELTDENFESRVSDTGSAG  | Negative |
| P27797 | LLSVPLLLGLLGLAVAEP AV | Negative |
| P27797 | VPLLLGLLGLAVAEP AVYFK | Negative |
| P27797 | AVAEP AVYFKEQFLDGDGWT | Negative |
| P27797 | YFKEQFLDGDGWTSRWIESK  | Negative |
| P27797 | KEQFLDGDGWTSRWIESKHK  | Negative |
| P27797 | SVPLLLGLLGLAVAEP AVYF | Negative |
| P27797 | QFLDGDGWTSRWIESKHKSD  | Negative |
| P27797 | GLAVAEP AVYFKEQFLDGDG | Negative |
| P27797 | PAVYFKEQFLDGDGWTSRWI  | Negative |
| P27797 | FKEQFLDGDGWTSRWIESKH  | Negative |
| P27797 | AEP AVYFKEQFLDGDGWTSR | Negative |
| P27797 | LLLGLLGLAVAEP AVYFKEQ | Negative |
| P27797 | FLDGDGWTSRWIESKHKSDF  | Negative |
| P27797 | EPAVYFKEQFLDGDGWTSRW  | Negative |
| P27797 | VYFKEQFLDGDGWTSRWIES  | Negative |
| P27797 | EQFLDGDGWTSRWIESKHKS  | Negative |
| P27797 | LLGLLGLAVAEP AVYFKEQF | Negative |
| P27797 | GLLGLAVAEP AVYFKEQFLD | Negative |
| P27797 | LGLAVAEP AVYFKEQFLDGD | Negative |
| P27797 | LLGLAVAEP AVYFKEQFLDG | Negative |
| P27797 | AVYFKEQFLDGDGWTSRWIE  | Negative |
| P27797 | GDGWTSRWIESKHKSDFGKF  | Negative |
| P27797 | LAVAEP AVYFKEQFLDGDGW | Negative |
| P27797 | DGDGWTSRWIESKHKSDFGK  | Negative |
| P27797 | PLLGLLGLAVAEP AVYFKE  | Negative |
| P27797 | LGLLGLAVAEP AVYFKEQFL | Negative |
| P27797 | VAEP AVYFKEQFLDGDGWTS | Negative |
| P27797 | MLLSVPLLLGLLGLAVAEP A | Negative |
| P27797 | LDGDGWTSRWIESKHKSDFG  | Negative |

|        |                        |          |
|--------|------------------------|----------|
| P27919 | IFFFLALLALVVSATFAQYA   | Negative |
| P27919 | MKIFFFLALLALVVSATFAQ   | Negative |
| P27919 | SDGSYEEVEGSHDRCQQHQM   | Negative |
| P27919 | KIFFFLALLALVVSATFAQY   | Negative |
| P27919 | YAESDGSYEEVEGSHDRCQQ   | Negative |
| P27919 | EVEGSHDRCQQHQMKLDS     | Negative |
| P27919 | GSYEEVEGSHDRCQQHQMKL   | Negative |
| P27919 | LVVSATFAQYAESDGSYEEV   | Negative |
| P27919 | AQYAESDGSYEEVEGSHDRC   | Negative |
| P27919 | FFLALLALVVSATFAQYAES   | Negative |
| P27919 | EEVEGSHDRCQQHQMKLDS    | Negative |
| P27919 | QYAESDGSYEEVEGSHDRCQ   | Negative |
| P27919 | AESDGSYEEVEGSHDRCQQH   | Negative |
| P27919 | LALVVSATFAQYAESDGSYE   | Negative |
| P27919 | TFAQYAESDGSYEEVEGSHD   | Negative |
| P27919 | YEEVEGSHDRCQQHQMKLDS   | Negative |
| P27919 | DGSYEEVEGSHDRCQQHQM    | Negative |
| P27919 | LLALVVSATFAQYAESDGSY   | Negative |
| P27919 | VVSATFAQYAESDGSYEEVE   | Negative |
| P27919 | ATFAQYAESDGSYEEVEGSH   | Negative |
| P27919 | SATFAQYAESDGSYEEVEGS   | Negative |
| P27919 | ALLALVVSATFAQYAESDGS   | Negative |
| P27919 | ALVVSATFAQYAESDGSYEE   | Negative |
| P27919 | FAQYAESDGSYEEVEGSHDR   | Negative |
| P27919 | FLALLALVVSATFAQYAESD   | Negative |
| P27919 | FFFLALLALVVSATFAQYAE   | Negative |
| P27919 | LALLALVVSATFAQYAESDG   | Negative |
| P27919 | SYEEVEGSHDRCQQHQMKL    | Negative |
| P27919 | ESDGSYEEVEGSHDRCQQHQ   | Negative |
| P27951 | SLFMGSVAHAASELVKDDSVK  | Negative |
| P27951 | RKFSVGVASVAVASLFMGSV   | Negative |
| P27951 | RYSIRKFSVGVASVAVASLF   | Negative |
| P27951 | KFSVGVASVAVASLFMGSVA   | Negative |
| P27951 | MFKSNYERKMRYRYSIRKFSVG | Negative |
| P27951 | NYERKMRYRYSIRKFSVGVASV | Negative |
| P27951 | YSIRKFSVGVASVAVASLFM   | Negative |
| P27951 | IRKFSVGVASVAVASLFMGS   | Negative |
| P27951 | VASLFMGSVAHAASELVKDD   | Negative |
| P27951 | VASVAVASLFMGSVAHAASEL  | Negative |
| P27951 | MRYRYSIRKFSVGVASVAVASL | Negative |
| P27951 | YERKMRYRYSIRKFSVGVASVA | Negative |
| P27951 | KSNYERKMRYRYSIRKFSVGVA | Negative |
| P27951 | FMGSVAHAASELVKDDSVKTT  | Negative |
| P27951 | SIRKFSVGVASVAVASLFMG   | Negative |
| P27951 | KMRYRYSIRKFSVGVASVAVAS | Negative |
| P27951 | SVGVASVAVASLFMGSVAHA   | Negative |

|        |                       |          |
|--------|-----------------------|----------|
| P27951 | GVASVAVASLFMGSVAHASE  | Negative |
| P27951 | FKSNYERKMRYSSIRKFSVGV | Negative |
| P27951 | ASVAVASLFMGSVAHASELV  | Negative |
| P27951 | VAVASLFMGSVAHASELVKD  | Negative |
| P27951 | ERKMRYSSIRKFSVGVASVAV | Negative |
| P27951 | LFMGSVAHASELVKDDSVKT  | Negative |
| P27951 | SNYERKMRYSSIRKFSVGVAS | Negative |
| P27951 | VGVASVAVASLFMGSVAHAS  | Negative |
| P27951 | RKMRYSSIRKFSVGVASVAVA | Negative |
| P27951 | FSVGVASVAVASLFMGSVAH  | Negative |
| P27951 | ASLFMGSVAHASELVKDDSV  | Negative |
| P27951 | AVASLFMGSVAHASELVKDD  | Negative |
| P28041 | TGQYCYAGMGLPSNPLEGCR  | Negative |
| P28041 | MASKSSITPLLLAAVLASVF  | Negative |
| P28041 | ASVFAAATATGQYCYAGMGL  | Negative |
| P28041 | VFAAATATGQYCYAGMGLPS  | Negative |
| P28041 | LLLA AVLASVFAAATATGQY | Negative |
| P28041 | AAVLASVFAAATATGQYCYA  | Negative |
| P28041 | FAAATATGQYCYAGMGLPSN  | Negative |
| P28041 | LASVFAAATATGQYCYAGMG  | Negative |
| P28041 | GQYCYAGMGLPSNPLEGCRE  | Negative |
| P28041 | ATGQYCYAGMGLPSNPLEG   | Negative |
| P28041 | SKSSITPLLLAAVLASVFAA  | Negative |
| P28041 | SVFAAATATGQYCYAGMGLP  | Negative |
| P28041 | SSITPLLLAAVLASVFAAAT  | Negative |
| P28041 | CYAGMGLPSNPLEGCREYVA  | Negative |
| P28041 | TATGQYCYAGMGLPSNPLEG  | Negative |
| P28041 | ATATGQYCYAGMGLPSNP    | Negative |
| P28041 | QYCYAGMGLPSNPLEGCREY  | Negative |
| P28041 | AVLASVFAAATATGQYCYAG  | Negative |
| P28041 | LA AVLASVFAAATATGQYCY | Negative |
| P28041 | VLASVFAAATATGQYCYAGM  | Negative |
| P28041 | SITPLLLAAVLASVFAAATA  | Negative |
| P28041 | ITPLLLAAVLASVFAAATAT  | Negative |
| P28041 | ASKSSITPLLLAAVLASVFA  | Negative |
| P28041 | PLLLAAVLASVFAAATATGQ  | Negative |
| P28041 | AATATGQYCYAGMGLPSNP   | Negative |
| P28041 | TPLLLAAVLASVFAAATATG  | Negative |
| P28041 | YCYAGMGLPSNPLEGCREYV  | Negative |
| P28041 | KSSITPLLLAAVLASVFAAA  | Negative |
| P28041 | AAATATGQYCYAGMGLPSNP  | Negative |
| P28053 | TSETQEQDVETVKKYLENYY  | Negative |
| P28053 | WGTGSHGFPAATSETQEQDV  | Negative |
| P28053 | LLLLLWGTGSHGFPAATSE   | Negative |
| P28053 | ETQEQDVETVKKYLENYYNL  | Negative |
| P28053 | ATSETQEQDVETVKKYLENY  | Negative |



|        |                       |          |
|--------|-----------------------|----------|
| P28053 | HGFPAATSETQEQDVETVKK  | Negative |
| P28053 | QEQDVETVKKYLENYYNLS   | Negative |
| P28053 | SHGFPAATSETQEQDVETVK  | Negative |
| P28053 | MPRLPLLLLLLWGTGSHGFP  | Negative |
| P28053 | QDVETVKKYLENYYNLSNG   | Negative |
| P28053 | SETQEQDVETVKKYLENYN   | Negative |
| P28053 | PAATSETQEQDVETVKKYLE  | Negative |
| P28053 | PRLPLLLLLLWGTGSHGFPA  | Negative |
| P28053 | PLLLLLLWGTGSHGFPAATS  | Negative |
| P28053 | RLPLLLLLLWGTGSHGFPA   | Negative |
| P28053 | EQDVETVKKYLENYYNLSN   | Negative |
| P28053 | DVETVKKYLENYYNLSNGK   | Negative |
| P28053 | GSHGFPAATSETQEQDVETV  | Negative |
| P28053 | GFPAAATSETQEQDVETVKKY | Negative |
| P28053 | LLWGTGSHGFPAATSETQE   | Negative |
| P28053 | LLLWGTGSHGFPAATSETQE  | Negative |
| P28053 | AATSETQEQDVETVKKYLEN  | Negative |
| P28053 | LWGTGSHGFPAATSETQE    | Negative |
| P28053 | GTGSHGFPAATSETQE      | Negative |
| P28053 | LLLWGTGSHGFPAATSETQ   | Negative |
| P28053 | TQEQDVETVKKYLENYYNLN  | Negative |
| P28053 | TGSHGFPAATSETQEQDVET  | Negative |
| P28053 | LLLLLWGTGSHGFPAATSET  | Negative |
| P28053 | FPAATSETQEQDVETVKKYL  | Negative |
| P28307 | ALAGVVPQYGGGGNHGGGN   | Negative |
| P28307 | AAIAAIVFSGSALAGVVPQY  | Negative |
| P28307 | GGNHGGGGNNSGPNSELNIY  | Negative |
| P28307 | LKVAAIAAIVFSGSALAGVV  | Negative |
| P28307 | KVAAIAAIVFSGSALAGVVP  | Negative |
| P28307 | VFSGSALAGVVPQYGGGGNH  | Negative |
| P28307 | IVFSGSALAGVVPQYGGGGN  | Negative |
| P28307 | GGGNHGGGGNNSGPNSELNI  | Negative |
| P28307 | LLKVAAIAAIVFSGSALAGV  | Negative |
| P28307 | FSGSALAGVVPQYGGGGNHG  | Negative |
| P28307 | KLLKVAAIAAIVFSGSALAG  | Negative |
| P28307 | AIAAIVFSGSALAGVVPQYG  | Negative |
| P28307 | VVPQYGGGGNHGGGGNNSGP  | Negative |
| P28307 | LAGVVPQYGGGGNHGGGGNN  | Negative |
| P28307 | SGSALAGVVPQYGGGGNHGG  | Negative |
| P28307 | SALAGVVPQYGGGGNHGGGG  | Negative |
| P28307 | AIVFSGSALAGVVPQYGGGG  | Negative |
| P28307 | GVVPQYGGGGNHGGGGNNSG  | Negative |
| P28307 | GSALAGVVPQYGGGGNHGGG  | Negative |
| P28307 | AGVVPQYGGGGNHGGGGNNS  | Negative |
| P28307 | VPQYGGGGNHGGGGNNSGPN  | Negative |
| P28307 | MKLLKVAAIAAIVFSGSALA  | Negative |

|        |                       |          |
|--------|-----------------------|----------|
| P28307 | YGGGGNHGGGGNNSGPNSEL  | Negative |
| P28307 | QYGGGGNHGGGGNNSGPNSE  | Negative |
| P28307 | AAIVFSGSALAGVVPQYGGG  | Negative |
| P28307 | IAAIVFSGSALAGVVPQYGG  | Negative |
| P28307 | GNHGGGGNNSGPNSELNIYQ  | Negative |
| P28307 | PQYGGGGNHGGGGNNSGPNS  | Negative |
| P28307 | GGGGNHGGGGNNSGPNSELN  | Negative |
| P28316 | EHAKVDTSNEARQDGIDLYK  | Negative |
| P28316 | MRSLLLLSIVFFVVTVSANK  | Negative |
| P28316 | RELCMKSLEHAKVDTSNEAR  | Negative |
| P28316 | LLSIVFFVVTVSANKTREL   | Negative |
| P28316 | MKSLEHAKVDTSNEARQDGI  | Negative |
| P28316 | SIVFFVVTVSANKTRELCKM  | Negative |
| P28316 | RSLLLLSIVFFVVTVSANKT  | Negative |
| P28316 | FFVVTVSANKTRELCKMSLE  | Negative |
| P28316 | LLSIVFFVVTVSANKTREL   | Negative |
| P28316 | TVSANKTRELCKMSLEHAKV  | Negative |
| P28316 | VVTVSANKTRELCKMSLEHA  | Negative |
| P28316 | LSIVFFVVTVSANKTRELCKM | Negative |
| P28316 | NKTRELCKMSLEHAKVDTSN  | Negative |
| P28316 | KTRELCKMSLEHAKVDTSNE  | Negative |
| P28316 | KSLEHAKVDTSNEARQDGID  | Negative |
| P28316 | TRELCKMSLEHAKVDTSNEA  | Negative |
| P28316 | LCMKSLEHAKVDTSNEARQD  | Negative |
| P28316 | ELCKMSLEHAKVDTSNEARQ  | Negative |
| P28316 | SANKTRELCKMSLEHAKVDT  | Negative |
| P28316 | VTVSANKTRELCKMSLEHAK  | Negative |
| P28316 | SLLLLSIVFFVVTVSANKTR  | Negative |
| P28316 | LEHAKVDTSNEARQDGIDLY  | Negative |
| P28316 | IVFFVVTVSANKTRELCKMS  | Negative |
| P28316 | VSANKTRELCKMSLEHAKVD  | Negative |
| P28316 | VFFVVTVSANKTRELCKMSL  | Negative |
| P28316 | FVVTVSANKTRELCKMSLEH  | Negative |
| P28316 | CKMSLEHAKVDTSNEARQDG  | Negative |
| P28316 | ANKTRELCKMSLEHAKVDTS  | Negative |
| P28316 | SLEHAKVDTSNEARQDGIDL  | Negative |
| P28319 | VSIRSGSDLQYLSVYSDNGT  | Negative |
| P28319 | LAKMVIADSEEFGLVSIRSG  | Negative |
| P28319 | VALFALAKMVIADSEEFGLV  | Negative |
| P28319 | GLVSIRSGSDLQYLSVYSDN  | Negative |
| P28319 | FGLVSIRSGSDLQYLSVYSD  | Negative |
| P28319 | IADSEEFGLVSIRSGSDLQY  | Negative |
| P28319 | ALFALAKMVIADSEEFGLVS  | Negative |
| P28319 | KMVIADSEEFGLVSIRSGSD  | Negative |
| P28319 | EEFGLVSIRSGSDLQYLSVY  | Negative |
| P28319 | SVALFALAKMVIADSEEFGL  | Negative |

|        |                       |          |
|--------|-----------------------|----------|
| P28319 | LVSIRSGSDLQYLSVYSDNG  | Negative |
| P28319 | ALAKMVIADSEEFGLVSIRS  | Negative |
| P28319 | ADSEEFGLVSIRSGSDLQYL  | Negative |
| P28319 | KFSTALSVALFALAKMVIAD  | Negative |
| P28319 | LSVALFALAKMVIADSEEFGL | Negative |
| P28319 | TALSVALFALAKMVIADSEE  | Negative |
| P28319 | MVIADSEEFGLVSIRSGSDL  | Negative |
| P28319 | DSEEFGLVSIRSGSDLQYLS  | Negative |
| P28319 | SIRSGSDLQYLSVYSDNGTL  | Negative |
| P28319 | EFGLVSIRSGSDLQYLSVYS  | Negative |
| P28319 | AKMVIADSEEFGLVSIRSGS  | Negative |
| P28319 | LFALAKMVIADSEEFGLVSI  | Negative |
| P28319 | IRSGSDLQYLSVYSDNGTLK  | Negative |
| P28319 | MKFSTALSVALFALAKMVIA  | Negative |
| P28319 | STALSVALFALAKMVIADSE  | Negative |
| P28319 | SEEFGLVSIRSGSDLQYLSV  | Negative |
| P28319 | FALAKMVIADSEEFGLVSIR  | Negative |
| P28319 | VIADSEEFGLVSIRSGSDLQ  | Negative |
| P28319 | FSTALSVALFALAKMVIADS  | Negative |
| P28325 | QSRTLAGGIHATDLNDKSVQ  | Negative |
| P28325 | PLLLLTALMVAVAGSASAQS  | Negative |
| P28325 | PMHTPLLLLTALMVAVAGSA  | Negative |
| P28325 | AGSASAQSRTLAGGIHATDL  | Negative |
| P28325 | AVAGSASAQSRTLAGGIHAT  | Negative |
| P28325 | VAGSASAQSRTLAGGIHATD  | Negative |
| P28325 | TPLLLLTALMVAVAGSASAQ  | Negative |
| P28325 | RTLAGGIHATDLNDKSVQCA  | Negative |
| P28325 | TLAGGIHATDLNDKSVQCAL  | Negative |
| P28325 | SAQSRTLAGGIHATDLNDKS  | Negative |
| P28325 | LMVAVAGSASAQSRTLAGGI  | Negative |
| P28325 | TALMVAVAGSASAQSRTLAG  | Negative |
| P28325 | VAVAGSASAQSRTLAGGIHA  | Negative |
| P28325 | WPMHTPLLLLTALMVAVAGS  | Negative |
| P28325 | SASAQSRTLAGGIHATDLND  | Negative |
| P28325 | MHTPLLLLTALMVAVAGSAS  | Negative |
| P28325 | ALMVAVAGSASAQSRTLAGG  | Negative |
| P28325 | AQSRTLAGGIHATDLNDKSV  | Negative |
| P28325 | MWPMHTPLLLLTALMVAVAG  | Negative |
| P28325 | ASAQSRTLAGGIHATDLNDK  | Negative |
| P28325 | GSASAQSRTLAGGIHATDLN  | Negative |
| P28325 | MVAVAGSASAQSRTLAGGIH  | Negative |
| P28325 | LAGGIHATDLNDKSVQCALD  | Negative |
| P28325 | LLTALMVAVAGSASAQSRTL  | Negative |
| P28325 | MMWPMHTPLLLLTALMVAVA  | Negative |
| P28325 | LLLLTALMVAVAGSASAQSR  | Negative |
| P28325 | LTALMVAVAGSASAQSRTLA  | Negative |

|        |                       |          |
|--------|-----------------------|----------|
| P28325 | SRTLAGGIHATDLNDKSVQC  | Negative |
| P28325 | LLLTALMVAVAGSASAQSRT  | Negative |
| P28351 | LESIMNQGTKRILLAATLAA  | Negative |
| P28351 | GLSIMNQGTKRILLAATLA   | Negative |
| P28351 | AATPWQVYGSIEQPSLLPTP  | Negative |
| P28351 | TKRILLAATLAATPWQVYGS  | Negative |
| P28351 | YGSIEQPSLLPTPPMGFNNW  | Negative |
| P28351 | QVYGSIEQPSLLPTPPMGFN  | Negative |
| P28351 | MNQGTKRILLAATLAATPWQ  | Negative |
| P28351 | NQGTKRILLAATLAATPWQV  | Negative |
| P28351 | LAATPWQVYGSIEQPSLLPT  | Negative |
| P28351 | QGTKRILLAATLAATPWQVY  | Negative |
| P28351 | MIQGLSIMNQGTKRILLAA   | Negative |
| P28351 | LAATLAATPWQVYGSIEQPS  | Negative |
| P28351 | RILLAATLAATPWQVYGSIE  | Negative |
| P28351 | IMNQGTKRILLAATLAATPW  | Negative |
| P28351 | GTKRILLAATLAATPWQVYG  | Negative |
| P28351 | WQVYGSIEQPSLLPTPPMGF  | Negative |
| P28351 | SIMNQGTKRILLAATLAATP  | Negative |
| P28351 | ESIMNQGTKRILLAATLAAT  | Negative |
| P28351 | ATLAATPWQVYGSIEQPSLL  | Negative |
| P28351 | VYGSIEQPSLLPTPPMGFNN  | Negative |
| P28351 | TLAATPWQVYGSIEQPSLLP  | Negative |
| P28351 | KRILLAATLAATPWQVYGSI  | Negative |
| P28351 | ILLAATLAATPWQVYGSIEQ  | Negative |
| P28351 | AATLAATPWQVYGSIEQPSL  | Negative |
| P28351 | ATPWQVYGSIEQPSLLPTPP  | Negative |
| P28351 | TPWQVYGSIEQPSLLPTPPM  | Negative |
| P28351 | QGLESIMNQGTKRILLAATL  | Negative |
| P28351 | PWQVYGSIEQPSLLPTPPMG  | Negative |
| P28351 | IQGLESIMNQGTKRILLAAT  | Negative |
| P28491 | KEQFLDGDGWTDRWIESKHK  | Negative |
| P28491 | AEPTIYFKEQFLDGDGWTDR  | Negative |
| P28491 | YFKEQFLDGDGWTDRWIESK  | Negative |
| P28491 | GDGWTDRWIESKHKPDFGRF  | Negative |
| P28491 | PLLLGLVGLAAAEPITFYFKE | Negative |
| P28491 | LVGLAAAEPITFYFKEQFLDG | Negative |
| P28491 | EPTIYFKEQFLDGDGWTDRW  | Negative |
| P28491 | AAEPTIYFKEQFLDGDGWTD  | Negative |
| P28491 | GLVGLAAAEPITFYFKEQFLD | Negative |
| P28491 | LLGLVGLAAAEPITFYFKEQF | Negative |
| P28491 | VGLAAAEPITFYFKEQFLDGD | Negative |
| P28491 | FLDGDGWTDRWIESKHKPDF  | Negative |
| P28491 | EQFLDGDGWTDRWIESKHKP  | Negative |
| P28491 | LLGLVGLAAAEPITFYFKEQ  | Negative |
| P28491 | VPLLLGLVGLAAAEPITFYFK | Negative |

|        |                      |          |
|--------|----------------------|----------|
| P28491 | LGLVGLAAAEPTIYFKEQFL | Negative |
| P28491 | LAAAEPTIYFKEQFLDGDGW | Negative |
| P28491 | PTIYFKEQFLDGDGWTDRWI | Negative |
| P28491 | TIYFKEQFLDGDGWTDRWIE | Negative |
| P28491 | AAAEPTIYFKEQFLDGDGWT | Negative |
| P28491 | FKEQFLDGDGWTDRWIESKH | Negative |
| P28491 | LLPVPLLLGLVGLAAAEPTI | Negative |
| P28491 | PVPLLLGLVGLAAAEPTIYF | Negative |
| P28491 | DGDGWTDRWIESKHKPDFGR | Negative |
| P28491 | LDGDGWTDRWIESKHKPDFG | Negative |
| P28491 | GLAAAEPTIYFKEQFLDGDG | Negative |
| P28491 | MLLPVPLLLGLVGLAAAEPT | Negative |
| P28491 | QFLDGDGWTDRWIESKHKPD | Negative |
| P28491 | IYFKEQFLDGDGWTDRWIES | Negative |
| P28581 | ATTKPDLYYLKNEQAIDSLK | Negative |
| P28581 | GCLFSLFSLSALAAIPAGND | Negative |
| P28581 | LFSLSLSALAAIPAGNDAT  | Negative |
| P28581 | SLFSLSALAAIPAGNDATTK | Negative |
| P28581 | IIAGCLFSLFSLSALAAIPA | Negative |
| P28581 | FSLSALAAIPAGNDATTKPD | Negative |
| P28581 | GNDATTKPDLYYLKNEQAID | Negative |
| P28581 | PAGNDATTKPDLYYLKNEQA | Negative |
| P28581 | AGCLFSLFSLSALAAIPAGN | Negative |
| P28581 | KNIIAGCLFSLFSLSALAAI | Negative |
| P28581 | KKNIIAGCLFSLFSLSALAA | Negative |
| P28581 | DATTKPDLYYLKNEQAIDSL | Negative |
| P28581 | SALAAIPAGNDATTKPDLYY | Negative |
| P28581 | FSLFSLSALAAIPAGNDATT | Negative |
| P28581 | LAAIPAGNDATTKPDLYYLK | Negative |
| P28581 | TTKPDLYYLKNEQAIDSLKL | Negative |
| P28581 | AAIPAGNDATTKPDLYYLKN | Negative |
| P28581 | TKPDLYYLKNEQAIDSLKLL | Negative |
| P28581 | NDATTKPDLYYLKNEQAIDS | Negative |
| P28581 | CLFSLFSLSALAAIPAGNDA | Negative |
| P28581 | AGNDATTKPDLYYLKNEQAI | Negative |
| P28581 | LFSLSALAAIPAGNDATTKP | Negative |
| P28581 | NIIAGCLFSLFSLSALAAIP | Negative |
| P28581 | MKKNIIAGCLFSLFSLSALA | Negative |
| P28581 | LSALAAIPAGNDATTKPDLY | Negative |
| P28581 | AIPAGNDATTKPDLYYLKNE | Negative |
| P28581 | IPAGNDATTKPDLYYLKNEQ | Negative |
| P28581 | ALAAIPAGNDATTKPDLYYL | Negative |
| P28581 | SLSALAAIPAGNDATTKPDL | Negative |
| P28585 | LGSVPLYAQTADVQQKLAEL | Negative |
| P28585 | LLGSVPLYAQTADVQQKLAE | Negative |
| P28585 | KKSLRQFTLMATATVTLLLG | Negative |

|        |                      |          |
|--------|----------------------|----------|
| P28585 | ATVTLLLSVPLYAQTADVQ  | Negative |
| P28585 | KSLRQFTLMATATVTLLLS  | Negative |
| P28585 | LMATATVTLLLSVPLYAQT  | Negative |
| P28585 | TLMATATVTLLLSVPLYAQ  | Negative |
| P28585 | PLYAQTADVQQKLAELERQS | Negative |
| P28585 | MVKKSLRQFTLMATATVTLL | Negative |
| P28585 | RQFTLMATATVTLLLSVPL  | Negative |
| P28585 | FTLMATATVTLLLSVPLYA  | Negative |
| P28585 | AQTADVQQKLAELERQSGGR | Negative |
| P28585 | TADVQQKLAELERQSGGRLG | Negative |
| P28585 | VPLYAQTADVQQKLAELERQ | Negative |
| P28585 | VTLLLSVPLYAQTADVQQ   | Negative |
| P28585 | LLLSVPLYAQTADVQQKLA  | Negative |
| P28585 | MATATVTLLLSVPLYAQTA  | Negative |
| P28585 | ATATVTLLLSVPLYAQTAD  | Negative |
| P28585 | GSVPLYAQTADVQQKLAELE | Negative |
| P28585 | VTLLLSVPLYAQTADVQQK  | Negative |
| P28585 | QTADVQQKLAELERQSGGRL | Negative |
| P28585 | YAQTADVQQKLAELERQSGG | Negative |
| P28585 | SLRQFTLMATATVTLLLSV  | Negative |
| P28585 | QFTLMATATVTLLLSVPLY  | Negative |
| P28585 | TLLLSVPLYAQTADVQQKL  | Negative |
| P28585 | VKKSLRQFTLMATATVTLLL | Negative |
| P28585 | SVPLYAQTADVQQKLAELER | Negative |
| P28585 | LYAQTADVQQKLAELERQSG | Negative |
| P28585 | LRQFTLMATATVTLLLSVP  | Negative |
| P28623 | LSRGKLLLFVSVMATSSIIA | Negative |
| P28623 | MIKHLLSRGKLLLFVSVMAT | Negative |
| P28623 | GKLLLFVSVMATSSIIAGGN | Negative |
| P28623 | MATSSIIAGGNAYGSTAFTG | Negative |
| P28623 | SIIAGGNAYGSTAFTGVRDV | Negative |
| P28623 | YGSTAFTGVRDVPAQQIVNE | Negative |
| P28623 | VSVMATSSIIAGGNAYGSTA | Negative |
| P28623 | LLFVSVMATSSIIAGGNAYG | Negative |
| P28623 | IKHLLSRGKLLLFVSVMATS | Negative |
| P28623 | IAGGNAYGSTAFTGVRDVPA | Negative |
| P28623 | RGKLLLFVSVMATSSIIAGG | Negative |
| P28623 | ATSSIIAGGNAYGSTAFTGV | Negative |
| P28623 | GNAYGSTAFTGVRDVPAQQI | Negative |
| P28623 | AGGNAYGSTAFTGVRDVPAQ | Negative |
| P28623 | SRGKLLLFVSVMATSSIIAG | Negative |
| P28623 | LLSRGKLLLFVSVMATSSII | Negative |
| P28623 | SVMATSSIIAGGNAYGSTAF | Negative |
| P28623 | AYGSTAFTGVRDVPAQQIVN | Negative |
| P28623 | IIAGGNAYGSTAFTGVRDVP | Negative |
| P28623 | FVSVMATSSIIAGGNAYGST | Negative |

|        |                      |          |
|--------|----------------------|----------|
| P28623 | LFVSVMATSSIIAGGNAYGS | Negative |
| P28623 | KHLLSRGKLLLFVSVMATSS | Negative |
| P28623 | NAYGSTAFTGVRDVPAQQIV | Negative |
| P28623 | TSSIIAGGNAYGSTAFTGVR | Negative |
| P28623 | GGNAYGSTAFTGVRDVPAQQ | Negative |
| P28623 | SSIIAGGNAYGSTAFTGVRD | Negative |
| P28623 | LLLFVSVMATSSIIAGGNAY | Negative |
| P28623 | HLLSRGKLLLFVSVMATSSI | Negative |
| P28623 | KLLLFVSVMATSSIIAGGNA | Negative |
| P28665 | SLLNGDSKYMVLVPSQLYTE | Negative |
| P28665 | SRRAQLCLFSVLLAFLHSAS | Negative |
| P28665 | AFLHSASLLNGDSKYMVLVP | Negative |
| P28665 | LLNGDSKYMVLVPSQLYTET | Negative |
| P28665 | HSASLLNGDSKYMVLVPSQL | Negative |
| P28665 | WKSRRACLCLFSVLLAFLHS | Negative |
| P28665 | KYMVLVPSQLYTETPEKICL | Negative |
| P28665 | AQLCLFSVLLAFLHSASLLN | Negative |
| P28665 | MWKSRRACLCLFSVLLAFLH | Negative |
| P28665 | GDSKYMVLVPSQLYTETPEK | Negative |
| P28665 | LCLFSVLLAFLHSASLLNGD | Negative |
| P28665 | DSKYMVLVPSQLYTETPEKI | Negative |
| P28665 | LAFLHSASLLNGDSKYMVLV | Negative |
| P28665 | RRAQLCLFSVLLAFLHSASL | Negative |
| P28665 | LLAFLHSASLLNGDSKYMVL | Negative |
| P28665 | FSVLLAFLHSASLLNGDSKY | Negative |
| P28665 | FLHSASLLNGDSKYMVLVPS | Negative |
| P28665 | LNGDSKYMVLVPSQLYTETP | Negative |
| P28665 | SKYMVLVPSQLYTETPEKIC | Negative |
| P28665 | CLFSVLLAFLHSASLLNGDS | Negative |
| P28665 | KSRRAQLCLFSVLLAFLHSA | Negative |
| P28665 | LHSASLLNGDSKYMVLVPSQ | Negative |
| P28665 | NGDSKYMVLVPSQLYTETPE | Negative |
| P28665 | VLLAFLHSASLLNGDSKYMV | Negative |
| P28665 | SASLLNGDSKYMVLVPSQLY | Negative |
| P28665 | ASLLNGDSKYMVLVPSQLYT | Negative |
| P28665 | LFSVLLAFLHSASLLNGDSK | Negative |
| P28665 | RAQLCLFSVLLAFLHSASLL | Negative |
| P28665 | QLCLFSVLLAFLHSASLLNG | Negative |
| P28770 | ATTLAESHGPQHCTSPNMTG | Negative |
| P28770 | HGPQHCTSPNMTGVLTVLAL | Negative |
| P28770 | VAALSIWLCLGATTLAESHG | Negative |
| P28770 | HCTSPNMTGVLTVLALTGGE | Negative |
| P28770 | FAVAALSIWLCLGATTLAES | Negative |
| P28770 | LSIWLCLGATTLAESHGPQH | Negative |
| P28770 | CTSPNMTGVLTVLALTGGEI | Negative |
| P28770 | PQHCTSPNMTGVLTVLALTG | Negative |

|        |                      |          |
|--------|----------------------|----------|
| P28770 | IWLCLGATTLAESHGPHCT  | Negative |
| P28770 | CLGATTLAESHGPHCTSPN  | Negative |
| P28770 | AESHGPHCTSPNMTGVLTV  | Negative |
| P28770 | LAESHGPHCTSPNMTGVLTV | Negative |
| P28770 | QHCTSPNMTGVLTVLALTGG | Negative |
| P28770 | LGATTLAESHGPHCTSPNM  | Negative |
| P28770 | ALSIWLCLGATTLAESHGPQ | Negative |
| P28770 | SIWLCLGATTLAESHGPHC  | Negative |
| P28770 | ESHGPHCTSPNMTGVLTVL  | Negative |
| P28770 | GPQHCTSPNMTGVLTVLALT | Negative |
| P28770 | AVAALSIWLCLGATTLAESH | Negative |
| P28770 | MQAFAVAALSIWLCLGATT  | Negative |
| P28770 | SHGPHCTSPNMTGVLTVLA  | Negative |
| P28770 | GATTLAESHGPHCTSPNMT  | Negative |
| P28770 | WLCLGATTLAESHGPHCTS  | Negative |
| P28770 | AFAVAALSIWLCLGATTAE  | Negative |
| P28770 | LCLGATTLAESHGPHCTSP  | Negative |
| P28770 | QAFAVAALSIWLCLGATT   | Negative |
| P28770 | TLAESHGPHCTSPNMTGVL  | Negative |
| P28770 | TSPNMTGVLTVLALTGGEIK | Negative |
| P28770 | TTLAESHGPHCTSPNMTGV  | Negative |
| P28798 | AAGLVAGTQCPDGQFCPVAC | Negative |
| P28798 | VACCLDQGGANYSCCNPLLD | Negative |
| P28798 | FAAGLVAGTQCPDGQFCPVA | Negative |
| P28798 | WLAFAAGLVAGTQCPDGQFC | Negative |
| P28798 | SWLAFAAGLVAGTQCPDGQF | Negative |
| P28798 | GLVAGTQCPDGQFCPVACCL | Negative |
| P28798 | CCLDQGGANYSCCNPLLDTW | Negative |
| P28798 | CPVACCLDQGGANYSCCNPL | Negative |
| P28798 | QFCPVACCLDQGGANYSCCN | Negative |
| P28798 | VAGTQCPDGQFCPVACCLDQ | Negative |
| P28798 | FCPVACCLDQGGANYSCCNP | Negative |
| P28798 | GQFCPVACCLDQGGANYSCC | Negative |
| P28798 | CPDGQFCPVACCLDQGGANY | Negative |
| P28798 | QCPDGQFCPVACCLDQGGAN | Negative |
| P28798 | ACCLDQGGANYSCCNPLLDT | Negative |
| P28798 | MSWLAFAAGLVAGTQCPDGQ | Negative |
| P28798 | TQCPDGQFCPVACCLDQGGA | Negative |
| P28798 | DGQFCPVACCLDQGGANYSC | Negative |
| P28798 | LVAGTQCPDGQFCPVACCLD | Negative |
| P28798 | AGTQCPDGQFCPVACCLDQG | Negative |
| P28798 | LAFAAGLVAGTQCPDGQFCP | Negative |
| P28798 | AFAAGLVAGTQCPDGQFCPV | Negative |
| P28798 | GTQCPDGQFCPVACCLDQGG | Negative |
| P28798 | AGLVAGTQCPDGQFCPVACC | Negative |
| P28798 | PDGQFCPVACCLDQGGANY  | Negative |



|        |                      |          |
|--------|----------------------|----------|
| P28798 | PVACCLDQGGANYSCCNPLL | Negative |
| P28798 | WVLMSWLAFAAGLVAGTQCP | Negative |
| P28798 | MWVLMSWLAFAAGLVAGTQC | Negative |
| P28798 | LMSWLAFAAGLVAGTQCPDG | Negative |
| P28800 | LLALILSCLSSLCSAQFSPV | Negative |
| P28800 | CSAQFSPVSTMEPLDLQLMD | Negative |
| P28800 | SCLSSLCSAQFSPVSTMEPL | Negative |
| P28800 | LWGLLALILSCLSSLCSAQF | Negative |
| P28800 | QFSPVSTMEPLDLQLMDGQA | Negative |
| P28800 | VSTMEPLDLQLMDGQAQQKL | Negative |
| P28800 | AQFSPVSTMEPLDLQLMDGQ | Negative |
| P28800 | SLCSAQFSPVSTMEPLDLQL | Negative |
| P28800 | SPVSTMEPLDLQLMDGQAQQ | Negative |
| P28800 | MALLWGLLALILSCLSSLCS | Negative |
| P28800 | LLWGLLALILSCLSSLCSAQ | Negative |
| P28800 | LSCLSSLCSAQFSPVSTMEP | Negative |
| P28800 | MEPLDLQLMDGQAQQKLPL  | Negative |
| P28800 | EPLDLQLMDGQAQQKLPLPS | Negative |
| P28800 | ILSCLSSLCSAQFSPVSTME | Negative |
| P28800 | GLLALILSCLSSLCSAQFSP | Negative |
| P28800 | LSSLCSAQFSPVSTMEPLDL | Negative |
| P28800 | FSPVSTMEPLDLQLMDGQAQ | Negative |
| P28800 | SSLCSAQFSPVSTMEPLDLQ | Negative |
| P28800 | PVSTMEPLDLQLMDGQAQQK | Negative |
| P28800 | WGLLALILSCLSSLCSAQFS | Negative |
| P28800 | TMEPLDLQLMDGQAQQKLPP | Negative |
| P28800 | SAQFSPVSTMEPLDLQLMDG | Negative |
| P28800 | ALLWGLLALILSCLSSLCSA | Negative |
| P28800 | ALILSCLSSLCSAQFSPVST | Negative |
| P28800 | LILSCLSSLCSAQFSPVSTM | Negative |
| P28800 | CLSSLCSAQFSPVSTMEPLD | Negative |
| P28800 | LCSAQFSPVSTMEPLDLQLM | Negative |
| P28800 | STMEPLDLQLMDGQAQQKLP | Negative |
| P29026 | AAWSSNGPNVMYYWGQNSAG | Negative |
| P29026 | NGPNVMYYWGQNSAGGSNTQ | Negative |
| P29026 | AWSSNGPNVMYYWGQNSAGG | Negative |
| P29026 | MAISAFLASTGVQAAWSSNG | Negative |
| P29026 | PNVMYYWGQNSAGGSNTQAS | Negative |
| P29026 | FLGMAISAFLASTGVQAAWS | Negative |
| P29026 | VQAAWSSNGPNVMYYWGQNS | Negative |
| P29026 | QAAWSSNGPNVMYYWGQNSA | Negative |
| P29026 | SSNGPNVMYYWGQNSAGGSN | Negative |
| P29026 | SAFLASTGVQAAWSSNGPNV | Negative |
| P29026 | AFLASTGVQAAWSSNGPNVM | Negative |
| P29026 | LARTFLGMAISAFLASTGVQ | Negative |
| P29026 | ARTFLGMAISAFLASTGVQA | Negative |

|        |                      |          |
|--------|----------------------|----------|
| P29026 | WSSNGPNVMYYWGQNSAGGS | Negative |
| P29026 | TGVQAAWSSNGPNVMYYWGQ | Negative |
| P29026 | GPNVMYYWGQNSAGGSNTQA | Negative |
| P29026 | LGMAISAFLASTGVQAAWSS | Negative |
| P29026 | GVQAAWSSNGPNVMYYWGQN | Negative |
| P29026 | MLARTFLGMAISAFLASTGV | Negative |
| P29026 | RTFLGMAISAFLASTGVQAA | Negative |
| P29026 | ASTGVQAAWSSNGPNVMYYW | Negative |
| P29026 | LASTGVQAAWSSNGPNVMYY | Negative |
| P29026 | NVMYYWGQNSAGGSNTQASL | Negative |
| P29026 | SNGPNVMYYWGQNSAGGSNT | Negative |
| P29026 | ISAFLASTGVQAAWSSNGPN | Negative |
| P29026 | TFLGMAISAFLASTGVQAAW | Negative |
| P29026 | FLASTGVQAAWSSNGPNVMY | Negative |
| P29026 | STGVQAAWSSNGPNVMYYWG | Negative |
| P29026 | AISAFLASTGVQAAWSSNGP | Negative |
| P29027 | QAAWSSHGPNVMYYWGQNSA | Negative |
| P29027 | SAFLASTGVQAAWSSHGPNV | Negative |
| P29027 | AFLASTGVQAAWSSHGPNVM | Negative |
| P29027 | LTRTFLGMAISAFLASTGVQ | Negative |
| P29027 | PNVMYYWGQNSAGGSNTQAS | Negative |
| P29027 | AAWSSHGPNVMYYWGQNSAG | Negative |
| P29027 | MLTRTFLGMAISAFLASTGV | Negative |
| P29027 | TRTFLGMAISAFLASTGVQA | Negative |
| P29027 | ASTGVQAAWSSHGPNVMYYW | Negative |
| P29027 | LASTGVQAAWSSHGPNVMYY | Negative |
| P29027 | FLASTGVQAAWSSHGPNVMY | Negative |
| P29027 | MAISAFLASTGVQAAWSSHG | Negative |
| P29027 | VQAAWSSHGPNVMYYWGQNS | Negative |
| P29027 | STGVQAAWSSHGPNVMYYWG | Negative |
| P29027 | FLGMAISAFLASTGVQAAWS | Negative |
| P29027 | TGVQAAWSSHGPNVMYYWGQ | Negative |
| P29027 | RTFLGMAISAFLASTGVQAA | Negative |
| P29027 | GVQAAWSSHGPNVMYYWGQN | Negative |
| P29027 | AWSSHGPNVMYYWGQNSAGG | Negative |
| P29027 | NVMYYWGQNSAGGSNTQASL | Negative |
| P29027 | SHGPNVMYYWGQNSAGGSNT | Negative |
| P29027 | GPNVMYYWGQNSAGGSNTQA | Negative |
| P29027 | HGPNVMYYWGQNSAGGSNTQ | Negative |
| P29027 | ISAFLASTGVQAAWSSHGPN | Negative |
| P29027 | TFLGMAISAFLASTGVQAAW | Negative |
| P29027 | AISAFLASTGVQAAWSSHGP | Negative |
| P29027 | LGMAISAFLASTGVQAAWSS | Negative |
| P29027 | WSSHGPNVMYYWGQNSAGGS | Negative |
| P29027 | SSHGPNVMYYWGQNSAGGSN | Negative |
| P29029 | YIILLFTQFLLLPTDAFDRS | Negative |

|        |                      |          |
|--------|----------------------|----------|
| P29029 | NIAVYWGQNSAGTQESLATY | Negative |
| P29029 | QFLLLPTDAFDRSANTNIAV | Negative |
| P29029 | LLPTDAFDRSANTNIAVYWG | Negative |
| P29029 | ANTNIAVYWGQNSAGTQESL | Negative |
| P29029 | TQFLLLPTDAFDRSANTNIA | Negative |
| P29029 | SANTNIAVYWGQNSAGTQES | Negative |
| P29029 | SLLYIILLFTQFLLLPTDAF | Negative |
| P29029 | IAVYWGQNSAGTQESLATYC | Negative |
| P29029 | AVYWGQNSAGTQESLATYCE | Negative |
| P29029 | LLYIILLFTQFLLLPTDAFD | Negative |
| P29029 | PTDAFDRSANTNIAVYWGQN | Negative |
| P29029 | DRSANTNIAVYWGQNSAGTQ | Negative |
| P29029 | LLFTQFLLLPTDAFDRSANT | Negative |
| P29029 | ILLFTQFLLLPTDAFDRSAN | Negative |
| P29029 | AFDRSANTNIAVYWGQNSAG | Negative |
| P29029 | FDRSANTNIAVYWGQNSAGT | Negative |
| P29029 | TDAFDRSANTNIAVYWGQNS | Negative |
| P29029 | LPTDAFDRSANTNIAVYWGQ | Negative |
| P29029 | RSANTNIAVYWGQNSAGTQE | Negative |
| P29029 | MSLLYIILLFTQFLLLPTDA | Negative |
| P29029 | LLLPTDAFDRSANTNIAVYW | Negative |
| P29029 | NTNIAVYWGQNSAGTQESLA | Negative |
| P29029 | LYIILLFTQFLLLPTDAFDR | Negative |
| P29029 | LFTQFLLLPTDAFDRSANTN | Negative |
| P29029 | FTQFLLLPTDAFDRSANTNI | Negative |
| P29029 | TNIAVYWGQNSAGTQESLAT | Negative |
| P29029 | DAFDRSANTNIAVYWGQNSA | Negative |
| P29029 | FLLLPTDAFDRSANTNIAVY | Negative |
| P29060 | VLFLRALKLEAGDIVIYWGQ | Negative |
| P29060 | LEAGDIVIYWGQNGNEGSLA | Negative |
| P29060 | LLTALVLFLRALKLEAGDIV | Negative |
| P29060 | IVIYWGQNGNEGSLADTCAT | Negative |
| P29060 | IYWGQNGNEGSLADTCATNN | Negative |
| P29060 | DIVIYWGQNGNEGSLADTCA | Negative |
| P29060 | AGDIVIYWGQNGNEGSLADT | Negative |
| P29060 | IKYSFLLTALVLFLRALKLE | Negative |
| P29060 | VIYWGQNGNEGSLADTCATN | Negative |
| P29060 | EAGDIVIYWGQNGNEGSLAD | Negative |
| P29060 | KLEAGDIVIYWGQNGNEGSL | Negative |
| P29060 | ALVLFLRALKLEAGDIVIYW | Negative |
| P29060 | FLRALKLEAGDIVIYWGQNG | Negative |
| P29060 | LVLFLRALKLEAGDIVIYWG | Negative |
| P29060 | FLLTALVLFLRALKLEAGDI | Negative |
| P29060 | SFLLTALVLFLRALKLEAGD | Negative |
| P29060 | LKLEAGDIVIYWGQNGNEGS | Negative |
| P29060 | LFLRALKLEAGDIVIYWGQN | Negative |

|        |                      |          |
|--------|----------------------|----------|
| P29060 | TALVLFLRALKLEAGDIVIY | Negative |
| P29060 | MIKYSFLLTALVLFLRALKL | Negative |
| P29060 | GDIVIYWGQNGNEGLADTC  | Negative |
| P29060 | KYSFLLTALVLFLRALKLEA | Negative |
| P29060 | YSFLLTALVLFLRALKLEAG | Negative |
| P29060 | GQNGNEGLADTCATNNYAI  | Negative |
| P29060 | WGQNGNEGLADTCATNNYA  | Negative |
| P29060 | LRALKLEAGDIVIYWGQNGN | Negative |
| P29060 | YWGQNGNEGLADTCATNNY  | Negative |
| P29060 | ALKLEAGDIVIYWGQNGNEG | Negative |
| P29060 | RALKLEAGDIVIYWGQNGNE | Negative |
| P29064 | IKAASLTPLLAALFTTLSST | Negative |
| P29064 | TTLSSTLALPSSVWEHQLET | Negative |
| P29064 | SIKAASLTPLLAALFTTSS  | Negative |
| P29064 | LSSTLALPSSVWEHQLETNV | Negative |
| P29064 | PSSVWEHQLETNVLALRDTN | Negative |
| P29064 | SVWEHQLETNVLALRDTNNN | Negative |
| P29064 | LTPLLAALFTTLSSTLALPS | Negative |
| P29064 | AALFTTLSSTLALPSSVWEH | Negative |
| P29064 | STLALPSSVWEHQLETNVLA | Negative |
| P29064 | LALPSSVWEHQLETNVLALR | Negative |
| P29064 | KAASLTPLLAALFTTLSSTL | Negative |
| P29064 | LLAALFTTLSSTLALPSSVW | Negative |
| P29064 | SSVWEHQLETNVLALRDTNN | Negative |
| P29064 | LAALFTTLSSTLALPSSVWE | Negative |
| P29064 | FTTLSSTLALPSSVWEHQLE | Negative |
| P29064 | LFTTLSSTLALPSSVWEHQL | Negative |
| P29064 | TPLLAALFTTLSSTLALPSS | Negative |
| P29064 | ASLTPLLAALFTTLSSTLAL | Negative |
| P29064 | PLLAALFTTLSSTLALPSSV | Negative |
| P29064 | RSIKAASLTPLLAALFTTLS | Negative |
| P29064 | ALPSSVWEHQLETNVLALRD | Negative |
| P29064 | TLALPSSVWEHQLETNVLAL | Negative |
| P29064 | VWEHQLETNVLALRDTNNNG | Negative |
| P29064 | ALFTTLSSTLALPSSVWEHQ | Negative |
| P29064 | AASLTPLLAALFTTLSSTLA | Negative |
| P29064 | LPSSVWEHQLETNVLALRDT | Negative |
| P29064 | SLTPLLAALFTTLSSTLALP | Negative |
| P29064 | TLSTLALPSSVWEHQLETN  | Negative |
| P29064 | MRSIKAASLTPLLAALFTTL | Negative |
| P29241 | IACVCLAVTLTSISPSEAIV | Negative |
| P29241 | AIIACVCLAVTLTSISPSEA | Negative |
| P29241 | SPSEAIVPTRELENVFLGRC | Negative |
| P29241 | SISPSEAIVPTRELENVFLG | Negative |
| P29241 | LTSISPSEAIVPTRELENVF | Negative |
| P29241 | VTLSISPSEAIVPTRELEN  | Negative |

|        |                      |          |
|--------|----------------------|----------|
| P29241 | CVCLAVTLTSISPSEAIVPT | Negative |
| P29241 | PVAIIACVCLAVTLTSISPS | Negative |
| P29241 | AVTLTSISPSEAIVPTRELE | Negative |
| P29241 | EAIVPTRELENVFLGRCKDY | Negative |
| P29241 | RELENVFLGRCKDYEITRYL | Negative |
| P29241 | VAIACVCLAVTLTSISPSE  | Negative |
| P29241 | SPVAIIACVCLAVTLTSISP | Negative |
| P29241 | ELENVFLGRCKDYEITRYLD | Negative |
| P29241 | AIVPTRELENVFLGRCKDYE | Negative |
| P29241 | IIACVCLAVTLTSISPSEAI | Negative |
| P29241 | PSEAIVPTRELENVFLGRCK | Negative |
| P29241 | IVPTRELENVFLGRCKDYEI | Negative |
| P29241 | VPTRELENVFLGRCKDYEIT | Negative |
| P29241 | CLAVTLTSISPSEAIVPTRE | Negative |
| P29241 | LAVTLTSISPSEAIVPTREL | Negative |
| P29241 | SEAIVPTRELENVFLGRCKD | Negative |
| P29241 | ISPSEAIVPTRELENVFLGR | Negative |
| P29241 | TLTSISPSEAIVPTRELENV | Negative |
| P29241 | TRELENVFLGRCKDYEITRY | Negative |
| P29241 | MSPVAIIACVCLAVTLTSIS | Negative |
| P29241 | TSISPSEAIVPTRELENVFL | Negative |
| P29241 | ACVCLAVTLTSISPSEAIVP | Negative |
| P29241 | PTRELENVFLGRCKDYEITR | Negative |
| P29288 | STLRFVAVGDWGGVPNAPFH | Negative |
| P29288 | LLGLQILLPLLAHCTAPAS  | Negative |
| P29288 | GLQILLPLLAHCTAPASTL  | Negative |
| P29288 | TLRFVAVGDWGGVPNAPFHT | Negative |
| P29288 | TAPASTLRFVAVGDWGGVPN | Negative |
| P29288 | QILLPLLAHCTAPASTLRF  | Negative |
| P29288 | LPLLAHCTAPASTLRFVAVG | Negative |
| P29288 | WMVLLGLQILLPLLAHCTA  | Negative |
| P29288 | HCTAPASTLRFVAVGDWGGV | Negative |
| P29288 | AHCTAPASTLRFVAVGDWGG | Negative |
| P29288 | CTAPASTLRFVAVGDWGGVP | Negative |
| P29288 | APASTLRFVAVGDWGGVPNA | Negative |
| P29288 | ILLPLLAHCTAPASTLRFV  | Negative |
| P29288 | PLLAHCTAPASTLRFVAVGD | Negative |
| P29288 | LLPLLAHCTAPASTLRFVAV | Negative |
| P29288 | RFVAVGDWGGVPNAPFHTAR | Negative |
| P29288 | VLLGLQILLPLLAHCTAPA  | Negative |
| P29288 | LRFVAVGDWGGVPNAPFHTA | Negative |
| P29288 | MDTWMVLLGLQILLPLLAH  | Negative |
| P29288 | LLLPLLAHCTAPASTLRFVA | Negative |
| P29288 | DTWMVLLGLQILLPLLAHC  | Negative |
| P29288 | LQILLPLLAHCTAPASTLR  | Negative |
| P29288 | ASTLRFVAVGDWGGVPNAPF | Negative |

|        |                      |          |
|--------|----------------------|----------|
| P29288 | FVAVGDWGGVPNAPFHTARE | Negative |
| P29288 | LLAHCTAPASTLRFVAVGDW | Negative |
| P29288 | LAHCTAPASTLRFVAVGDWG | Negative |
| P29288 | MVLLGLQILLPLLAHCTAP  | Negative |
| P29288 | PASTLRFVAVGDWGGVPNAP | Negative |
| P29288 | TWMVLLGLQILLPLLAHCT  | Negative |
| P29392 | STATVDSMDWLPRNTNCGGI | Negative |
| P29392 | RNTNCGGILKEESGVIATYY | Negative |
| P29392 | WLPRNTNCGGILKEESGVIA | Negative |
| P29392 | LSSVIPWALLLSTATVDSMD | Negative |
| P29392 | TNCGGILKEESGVIATYYGP | Negative |
| P29392 | SMDWLPRNTNCGGILKEESG | Negative |
| P29392 | NTNCGGILKEESGVIATYYG | Negative |
| P29392 | DSMDWLPRNTNCGGILKEES | Negative |
| P29392 | TATVDSMDWLPRNTNCGGIL | Negative |
| P29392 | LLSTATVDSMDWLPRNTNCG | Negative |
| P29392 | MDWLPRNTNCGGILKEESGV | Negative |
| P29392 | CGGILKEESGVIATYYGPKT | Negative |
| P29392 | LLLSTATVDSMDWLPRNTNC | Negative |
| P29392 | TVDSMDWLPRNTNCGGILKE | Negative |
| P29392 | ALLSTATVDSMDWLPRNTN  | Negative |
| P29392 | NCGGILKEESGVIATYYGPK | Negative |
| P29392 | SSVIPWALLLSTATVDSMDW | Negative |
| P29392 | WALLLSTATVDSMDWLPRNT | Negative |
| P29392 | DWLPRNTNCGGILKEESGVI | Negative |
| P29392 | PRNTNCGGILKEESGVIATY | Negative |
| P29392 | VDSMDWLPRNTNCGGILKEE | Negative |
| P29392 | LPRNTNCGGILKEESGVIAT | Negative |
| P29392 | MKLSSVIPWALLLSTATVDS | Negative |
| P29392 | IPWALLLSTATVDSMDWLPR | Negative |
| P29392 | ATVDSMDWLPRNTNCGGILK | Negative |
| P29392 | KLSSVIPWALLLSTATVDSM | Negative |
| P29392 | SVIPWALLLSTATVDSMDWL | Negative |
| P29392 | PWALLLSTATVDSMDWLPRN | Negative |
| P29392 | LSTATVDSMDWLPRNTNCGG | Negative |
| P29399 | MKTTFFANLLASQTRELTE  | Negative |
| P29399 | EMTAGGTASQQSPVQEVPEQ | Negative |
| P29399 | TASQQSPVQEVPEQPFATMR | Negative |
| P29399 | ASQTRELTENELEMTAGGTA | Negative |
| P29399 | ELEMTAGGTASQQSPVQEV  | Negative |
| P29399 | LTENELEMTAGGTASQQSPV | Negative |
| P29399 | LEMTAGGTASQQSPVQEVPE | Negative |
| P29399 | ANLLASQTRELTENELEMTA | Negative |
| P29399 | ENELEMTAGGTASQQSPVQE | Negative |
| P29399 | LLASQTRELTENELEMTAGG | Negative |
| P29399 | FFANLLASQTRELTENELEM | Negative |

|        |                      |          |
|--------|----------------------|----------|
| P29399 | GTASQQSPVQEVPEQPFATM | Negative |
| P29399 | GGTASQQSPVQEVPEQPFAT | Negative |
| P29399 | QTRELTENELEMTAGGTASQ | Negative |
| P29399 | KTTPFFANLLASQTRELTEN | Negative |
| P29399 | TENELEMTAGGTASQQSPVQ | Negative |
| P29399 | NELEMTAGGTASQQSPVQEV | Negative |
| P29399 | SQTRELTENELEMTAGGTAS | Negative |
| P29399 | ELTENELEMTAGGTASQQSP | Negative |
| P29399 | PFFANLLASQTRELTENELE | Negative |
| P29399 | FANLLASQTRELTENELEMT | Negative |
| P29399 | LASQTRELTENELEMTAGGT | Negative |
| P29399 | NLLASQTRELTENELEMTAG | Negative |
| P29399 | AGGTASQQSPVQEVPEQPFA | Negative |
| P29399 | MTAGGTASQQSPVQEVPEQP | Negative |
| P29399 | RELTENELEMTAGGTASQQS | Negative |
| P29399 | TAGGTASQQSPVQEVPEQPF | Negative |
| P29399 | TTPFFANLLASQTRELTENE | Negative |
| P29399 | TPFFANLLASQTRELTENEL | Negative |
| P29421 | VSLRLPLILLSLLAISFSCS | Negative |
| P29421 | TEGHELSADGSYYVLPASPG | Negative |
| P29421 | SCSAAPPPVYDTEGHELSAD | Negative |
| P29421 | APPPVYDTEGHELSADGSYY | Negative |
| P29421 | SLLAISFSCSAAPPPVYDTE | Negative |
| P29421 | AAPPPVYDTEGHELSADGSY | Negative |
| P29421 | PPPVYDTEGHELSADGSYYV | Negative |
| P29421 | SAAPPPVYDTEGHELSADGS | Negative |
| P29421 | PVYDTEGHELSADGSYYVLP | Negative |
| P29421 | PPVYDTEGHELSADGSYYVL | Negative |
| P29421 | ILLSLLAISFSCSAAPPPVY | Negative |
| P29421 | YDTEGHELSADGSYYVLPAS | Negative |
| P29421 | DTEGHELSADGSYYVLPASP | Negative |
| P29421 | ISFSCSAAPPPVYDTEGHEL | Negative |
| P29421 | LSLLAISFSCSAAPPPVYDT | Negative |
| P29421 | LRLPLILLSLLAISFSCSAA | Negative |
| P29421 | LPLILLSLLAISFSCSAAPP | Negative |
| P29421 | LLAISFSCSAAPPPVYDTEG | Negative |
| P29421 | SLRLPLILLSLLAISFSCSA | Negative |
| P29421 | CSAAPPPVYDTEGHELSADG | Negative |
| P29421 | AISFSCSAAPPPVYDTEGHE | Negative |
| P29421 | FSCSAAPPPVYDTEGHELSA | Negative |
| P29421 | LLSLLAISFSCSAAPPPVYD | Negative |
| P29421 | SFSCSAAPPPVYDTEGHELS | Negative |
| P29421 | LAISFSCSAAPPPVYDTEGH | Negative |
| P29421 | VYDTEGHELSADGSYYVLP  | Negative |
| P29421 | PLILLSLLAISFSCSAAPPP | Negative |
| P29421 | MVSLRLPLILLSLLAISFSC | Negative |

|        |                        |          |
|--------|------------------------|----------|
| P29421 | RLPLILLSLLAISFSCSAAP   | Negative |
| P29457 | GTAEKLSSKATTLAERSTGL   | Negative |
| P29457 | GTLCLLAVALAAEVKKPVEA   | Negative |
| P29457 | TLCLLAVALAAEVKKPVEAA   | Negative |
| P29457 | AEVKKPVEAAAPGTAEKLSS   | Negative |
| P29457 | LGTLCLLAVALAAEVKKPVE   | Negative |
| P29457 | LLAVALAAEVKKPVEAAAPG   | Negative |
| P29457 | LLGTLCLLAVALAAEVKKPV   | Negative |
| P29457 | EVKKPVEAAAPGTAEKLSSK   | Negative |
| P29457 | KKPVEAAAPGTAEKLSSKAT   | Negative |
| P29457 | LAAEVKKPVEAAAPGTAEKL   | Negative |
| P29457 | CLLAVALAAEVKKPVEAAAP   | Negative |
| P29457 | EAAAPGTAEKLSSKATTLAE   | Negative |
| P29457 | LLLGTLCCLLAVALAAEVKKP  | Negative |
| P29457 | VKKPVEAAAPGTAEKLSSKA   | Negative |
| P29457 | LAVALAAEVKKPVEAAAPGT   | Negative |
| P29457 | VEAAAPGTAEKLSSKATTLA   | Negative |
| P29457 | PGTAEKLSSKATTLAERSTG   | Negative |
| P29457 | RSLLLGTLCCLLAVALAAEVK  | Negative |
| P29457 | PVEAAAPGTAEKLSSKATTL   | Negative |
| P29457 | LCLLAVALAAEVKKPVEAAA   | Negative |
| P29457 | AAEVKKPVEAAAPGTAEKLS   | Negative |
| P29457 | AVALAAEVKKPVEAAAPGTA   | Negative |
| P29457 | KPVEAAAPGTAEKLSSKATT   | Negative |
| P29457 | APGTAEKLSSKATTLAERST   | Negative |
| P29457 | ALAAEVKKPVEAAAPGTAEK   | Negative |
| P29457 | VALAAEVKKPVEAAAPGTAE   | Negative |
| P29457 | AAPGTAEKLSSKATTLAERS   | Negative |
| P29457 | MRSLLLGTLCCLLAVALAAEV  | Negative |
| P29457 | AAAPGTAEKLSSKATTLAER   | Negative |
| P29459 | PVATPDPGMFPC LHHSQNLL  | Negative |
| P29459 | LLLVATLVLLDHLSLARNLP   | Negative |
| P29459 | LARNLPVATPDPGMFPC LHH  | Negative |
| P29459 | LPVATPDPGMFPC LHHSQNL  | Negative |
| P29459 | TPDPGMFPC LHHSQNLLRAV  | Negative |
| P29459 | CPARSLLLVATLVLLDHLSL   | Negative |
| P29459 | LDHLSLARNLPVATPDPGMF   | Negative |
| P29459 | RNLVPVATPDPGMFPC LHHSQ | Negative |
| P29459 | VATLVLLDHLSLARNLPVAT   | Negative |
| P29459 | MCPARSLLLVATLVLLDHLS   | Negative |
| P29459 | LSLARNLPVATPDPGMFPC L  | Negative |
| P29459 | PDPGMFPC LHHSQNLLRAVS  | Negative |
| P29459 | ARSLLLVATLVLLDHLSLAR   | Negative |
| P29459 | PARSLLLVATLVLLDHLSLA   | Negative |
| P29459 | VATPDPGMFPC LHHSQNLLR  | Negative |
| P29459 | TLVLLDHLSLARNLPVATPD   | Negative |



|        |                        |          |
|--------|------------------------|----------|
| P29459 | NLPVATPDPGMFPC LHHSQN  | Negative |
| P29459 | SLLL VATL VLLDHLSLARNL | Negative |
| P29459 | LVATL VLLDHLSLARNLPVA  | Negative |
| P29459 | ATPDPGMFPC LHHSQNLLRA  | Negative |
| P29459 | ARNLPVATPDPGMFPC LHHS  | Negative |
| P29459 | LLDHLSLARNLPVATPDPGM   | Negative |
| P29459 | LVLLDHLSLARNLPVATPDP   | Negative |
| P29459 | RSLLL VATL VLLDHLSLARN | Negative |
| P29459 | VLLDHLSLARNLPVATPDPG   | Negative |
| P29459 | HLSLARNLPVATPDPGMFPC   | Negative |
| P29459 | ATLVLLDHLSLARNLPVATP   | Negative |
| P29459 | SLARNLPVATPDPGMFPC LH  | Negative |
| P29459 | DHLSLARNLPVATPDPGMFP   | Negative |
| P29460 | LVFLASPLVAIWELKKDVYV   | Negative |
| P29460 | VFLASPLVAIWELKKDVYVV   | Negative |
| P29460 | WFSLVFLASPLVAIWELKKD   | Negative |
| P29460 | CHQQLVISWFSLVFLASPLV   | Negative |
| P29460 | IWELKKDVYVVVELDWYPDAP  | Negative |
| P29460 | LKKDVYVVVELDWYPDAPGEM  | Negative |
| P29460 | VAIWELKKDVYVVVELDWYPD  | Negative |
| P29460 | FLASPLVAIWELKKDVYVVE   | Negative |
| P29460 | LVISWFSLVFLASPLVAIWE   | Negative |
| P29460 | AIWELKKDVYVVVELDWYPDA  | Negative |
| P29460 | ASPLVAIWELKKDVYVVVELD  | Negative |
| P29460 | QQLVISWFSLVFLASPLVAI   | Negative |
| P29460 | PLVAIWELKKDVYVVVELDWY  | Negative |
| P29460 | KKDVYVVVELDWYPDAPGEMV  | Negative |
| P29460 | LASPLVAIWELKKDVYVVEL   | Negative |
| P29460 | SLVFLASPLVAIWELKKDVY   | Negative |
| P29460 | FSLVFLASPLVAIWELKKDV   | Negative |
| P29460 | HQQLVISWFSLVFLASPLVA   | Negative |
| P29460 | KDVYVVVELDWYPDAPGEMVV  | Negative |
| P29460 | VYVVVELDWYPDAPGEMVLT   | Negative |
| P29460 | SWFSLVFLASPLVAIWELKK   | Negative |
| P29460 | MCHQQLVISWFSLVFLASPL   | Negative |
| P29460 | DVYVVVELDWYPDAPGEMVVL  | Negative |
| P29460 | ELKKDVYVVVELDWYPDAPGE  | Negative |
| P29460 | SPLVAIWELKKDVYVVVELDW  | Negative |
| P29460 | LVAIWELKKDVYVVVELDWYP  | Negative |
| P29460 | QLVISWFSLVFLASPLVAIW   | Negative |
| P29460 | WELKKDVYVVVELDWYPDAPG  | Negative |
| P29460 | VISWFSLVFLASPLVAIWEL   | Negative |
| P29523 | EDRYHPERLAAGEASAATRS   | Negative |
| P29523 | RYHPERLAAGEASAATRSAA   | Negative |
| P29523 | LAAGEASAATRSAAESEASF   | Negative |
| P29523 | LVVVAAAAAAGLVRAEDRYH   | Negative |

|        |                       |          |
|--------|-----------------------|----------|
| P29523 | STWWLVVVAAAAAAGLVRAE  | Negative |
| P29523 | ERLAAGEASAATRSAAESEA  | Negative |
| P29523 | AAGLVRAEDRYHPERLAAGE  | Negative |
| P29523 | RAEDRYHPERLAAGEASAAT  | Negative |
| P29523 | WLVVVAAAAAAGLVRAEDRY  | Negative |
| P29523 | MSTWWLVVVAAAAAAGLVRA  | Negative |
| P29523 | DRYHPERLAAGEASAATRSA  | Negative |
| P29523 | AAAGLVRAEDRYHPERLAAG  | Negative |
| P29523 | LVRAEDRYHPERLAAGEASA  | Negative |
| P29523 | VAAAAAAGLVRAEDRYHPER  | Negative |
| P29523 | VRAEDRYHPERLAAGEASAA  | Negative |
| P29523 | AAAAAAGLVRAEDRYHPERL  | Negative |
| P29523 | RLAAGEASAATRSAAESEAS  | Negative |
| P29523 | GLVRAEDRYHPERLAAGEAS  | Negative |
| P29523 | AGLVRAEDRYHPERLAAGEA  | Negative |
| P29523 | AAAAAGLVRAEDRYHPERLA  | Negative |
| P29523 | PERLAAGEASAATRSAAESE  | Negative |
| P29523 | WWLVVVAAAAAAGLVRAEDR  | Negative |
| P29523 | VVVAAAAAAGLVRAEDRYHP  | Negative |
| P29523 | VVVAAAAAAGLVRAEDRYHPE | Negative |
| P29523 | YHPERLAAGEASAATRSAAE  | Negative |
| P29523 | AAAAGLVRAEDRYHPERLAA  | Negative |
| P29523 | AEDRYHPERLAAGEASAATR  | Negative |
| P29523 | TWWLVVVAAAAAAGLVRAED  | Negative |
| P29523 | AAGEASAATRSAAESEASFW  | Negative |
| P29739 | LAILTAAGSANAGINLYDAD  | Negative |
| P29739 | SANAGINLYDADGVKTDLSG  | Negative |
| P29739 | AGINLYDADGVKTDLSGAAE  | Negative |
| P29739 | GSANAGINLYDADGVKTDLS  | Negative |
| P29739 | ILTAAGSANAGINLYDADGV  | Negative |
| P29739 | INLYDADGVKTDLSGAAEVQ  | Negative |
| P29739 | DGVKTDLSGAAEVQYRQTFK  | Negative |
| P29739 | AGSANAGINLYDADGVKTDL  | Negative |
| P29739 | GVKTDLSGAAEVQYRQTFKE  | Negative |
| P29739 | KTLVALAILTAAGSANAGIN  | Negative |
| P29739 | VALAILTAAGSANAGINLYD  | Negative |
| P29739 | TAAGSANAGINLYDADGVKT  | Negative |
| P29739 | YDADGVKTDLSGAAEVQYRQ  | Negative |
| P29739 | ANAGINLYDADGVKTDLSGA  | Negative |
| P29739 | NLYDADGVKTDLSGAAEVQY  | Negative |
| P29739 | VKTDLSGAAEVQYRQTFKED  | Negative |
| P29739 | DADGVKTDLSGAAEVQYRQT  | Negative |
| P29739 | ALAILTAAGSANAGINLYDA  | Negative |
| P29739 | LTAAGSANAGINLYDADGVK  | Negative |
| P29739 | ADGVKTDLSGAAEVQYRQTF  | Negative |
| P29739 | AAGSANAGINLYDADGVKTD  | Negative |

|        |                       |          |
|--------|-----------------------|----------|
| P29739 | KKTLVALAILTAAGSANAGI  | Negative |
| P29739 | MKKTLVALAILTAAGSANAG  | Negative |
| P29739 | KTDLSGAAEVQYRQTFKEDS  | Negative |
| P29739 | NAGINLYDADGVKTDLSGAA  | Negative |
| P29739 | TLVALAILTAAGSANAGINL  | Negative |
| P29739 | LYDADGVKTDLSGAAEVQYR  | Negative |
| P29739 | GINLYDADGVKTDLSGAAEV  | Negative |
| P29739 | AILTAAGSANAGINLYDADG  | Negative |
| P29788 | VSLADQESCKGRCTQGFMAS  | Negative |
| P29788 | LVAWVSLADQESCKGRCTQG  | Negative |
| P29788 | VAWVSLADQESCKGRCTQGF  | Negative |
| P29788 | APLRPFFILALVAWVSLADQ  | Negative |
| P29788 | LADQESCKGRCTQGFMASKK  | Negative |
| P29788 | ESCKGRCTQGFMASKKQCQCD | Negative |
| P29788 | KGRCTQGFMASKKQCQDELCT | Negative |
| P29788 | GRCTQGFMASKKQCQDELCT  | Negative |
| P29788 | SLADQESCKGRCTQGFMASK  | Negative |
| P29788 | QESCKGRCTQGFMASKKQCQ  | Negative |
| P29788 | DQESCKGRCTQGFMASKKQCQ | Negative |
| P29788 | FILALVAWVSLADQESCKGR  | Negative |
| P29788 | QGFMASKKQCQDELCTYYQS  | Negative |
| P29788 | WVSLADQESCKGRCTQGFMA  | Negative |
| P29788 | FFILALVAWVSLADQESCKG  | Negative |
| P29788 | ILALVAWVSLADQESCKGRC  | Negative |
| P29788 | PLRPFFILALVAWVSLADQE  | Negative |
| P29788 | CKGRCTQGFMASKKQCDELCT | Negative |
| P29788 | LALVAWVSLADQESCKGRCT  | Negative |
| P29788 | ADQESCKGRCTQGFMASKKC  | Negative |
| P29788 | SCKGRCTQGFMASKKQCDE   | Negative |
| P29788 | ALVAWVSLADQESCKGRCTQ  | Negative |
| P29788 | RCTQGFMASKKQCQDELCTY  | Negative |
| P29788 | TQGFMASKKQCQDELCTYYQ  | Negative |
| P29788 | MAPLRPFFILALVAWVSLAD  | Negative |
| P29788 | LRPFFILALVAWVSLADQES  | Negative |
| P29788 | PFFILALVAWVSLADQESCK  | Negative |
| P29788 | AWVSLADQESCKGRCTQGFMA | Negative |
| P29788 | CTQGFMASKKQCQDELCTYY  | Negative |
| P29794 | QGSWQRSLQDTEEKSRFSAP  | Negative |
| P29794 | GSWQRSLQDTEEKSRFSAP   | Negative |
| P29794 | EKSRSFSAPQTEPLNDLDQM  | Negative |
| P29794 | VQGSWQRSLQDTEEKSRFS   | Negative |
| P29794 | MKSIYFVAGLFVMLVQGSWQ  | Negative |
| P29794 | MLVQGSWQRSLQDTEEKSR   | Negative |
| P29794 | IYFVAGLFVMLVQGSWQRSL  | Negative |
| P29794 | KSIYFVAGLFVMLVQGSWQR  | Negative |
| P29794 | WQRSLQDTEEKSRFSAPQT   | Negative |

|        |                        |          |
|--------|------------------------|----------|
| P29794 | QDTEEKSRFSAPQTEPLND    | Negative |
| P29794 | GLFVMLVQGSWQRS LQDTEE  | Negative |
| P29794 | SWQRS LQDTEEKSRFSAPQ   | Negative |
| P29794 | SLQDTEEKSRFSAPQTEPL    | Negative |
| P29794 | LVQGSWQRS LQDTEEKSRFS  | Negative |
| P29794 | LFVMLVQGSWQRS LQDTEEK  | Negative |
| P29794 | TEEKSRFSAPQTEPLNDLD    | Negative |
| P29794 | AGLFVMLVQGSWQRS LQDTE  | Negative |
| P29794 | DTEEKSRFSAPQTEPLNDL    | Negative |
| P29794 | FVMLVQGSWQRS LQDTEEK   | Negative |
| P29794 | VMLVQGSWQRS LQDTEEKSR  | Negative |
| P29794 | SIYFVAGLFVMLVQGSWQRS   | Negative |
| P29794 | LQDTEEKSRFSAPQTEPLN    | Negative |
| P29794 | EEKSRFSAPQTEPLNDLDQ    | Negative |
| P29794 | KSRFSAPQTEPLNDLDQMN    | Negative |
| P29794 | RSLQDTEEKSRFSAPQTEP    | Negative |
| P29794 | YFVAGLFVMLVQGSWQRS LQ  | Negative |
| P29794 | QRS LQDTEEKSRFSAPQTE   | Negative |
| P29794 | SRSFSAPQTEPLNDLDQMNE   | Negative |
| P29794 | VAGLFVMLVQGSWQRS LQDT  | Negative |
| P29822 | MDYSRLLKRSVSAALTAAL    | Negative |
| P29822 | SVSAALTAALLCSTA AFAG   | Negative |
| P29822 | LLKRSVSAALTAALLCSTA    | Negative |
| P29822 | STA AFAGEVTIWCWDPNFNV  | Negative |
| P29822 | AFAGEVTIWCWDPNFNV AIM  | Negative |
| P29822 | LCSTA AFAGEVTIWCWDPNF  | Negative |
| P29822 | SAALTAALLCSTA AFAGEV   | Negative |
| P29822 | YSRLLKRSVSAALTAALLC    | Negative |
| P29822 | VSAALTAALLCSTA AFAGE   | Negative |
| P29822 | KRSVSAALTAALLCSTA AF   | Negative |
| P29822 | LKRSVSAALTAALLCSTA A   | Negative |
| P29822 | AALTAALLCSTA AFAGEVT   | Negative |
| P29822 | RSVSAALTAALLCSTA AFA   | Negative |
| P29822 | LTAAALLCSTA AFAGEVTIW  | Negative |
| P29822 | EVTIWCWDPNFNV AIMKEA   | Negative |
| P29822 | DYSRLLKRSVSAALTAALL    | Negative |
| P29822 | SRLKRSVSAALTAALLCS     | Negative |
| P29822 | TAAALLCSTA AFAGEVTIWC  | Negative |
| P29822 | AA FAGEVTIWCWDPNFNV AI | Negative |
| P29822 | AALLCSTA AFAGEVTIWCW   | Negative |
| P29822 | RLLKRSVSAALTAALLCST    | Negative |
| P29822 | CSTA AFAGEVTIWCWDPNFN  | Negative |
| P29822 | TAA FAGEVTIWCWDPNFNV A | Negative |
| P29822 | AGEVTIWCWDPNFNV AIMKE  | Negative |
| P29822 | FAGEVTIWCWDPNFNV AIMK  | Negative |
| P29822 | GEVTIWCWDPNFNV AIMKEA  | Negative |

|        |                      |          |
|--------|----------------------|----------|
| P29822 | LLCSTAAFAGEVTIWCWDPN | Negative |
| P29822 | AAALLCSTAAFAGEVTIWCW | Negative |
| P29822 | ALLCSTAAFAGEVTIWCWDP | Negative |
| P29957 | NKIITTAGLSLGLLLPSIAT | Negative |
| P29957 | ITTAGLSLGLLLPSIATATP | Negative |
| P29957 | TTFVHLFEWNWQDVAQECEQ | Negative |
| P29957 | GLLLPSIATATPTTFVHLFE | Negative |
| P29957 | LLPSIATATPTTFVHLFEWN | Negative |
| P29957 | GLSLGLLLPSIATATPTTFV | Negative |
| P29957 | IATATPTTFVHLFEWNWQDV | Negative |
| P29957 | IITTAGLSLGLLLPSIATAT | Negative |
| P29957 | TPTTFVHLFEWNWQDVAQEC | Negative |
| P29957 | KLNKIITTAGLSLGLLLPSI | Negative |
| P29957 | LPSIATATPTTFVHLFEWNW | Negative |
| P29957 | VHLFEWNWQDVAQECEQYLG | Negative |
| P29957 | LLLPSIATATPTTFVHLFEW | Negative |
| P29957 | MKLNKIITTAGLSLGLLLPS | Negative |
| P29957 | FVHLFEWNWQDVAQECEQYL | Negative |
| P29957 | SIATATPTTFVHLFEWNWQD | Negative |
| P29957 | TFVHLFEWNWQDVAQECEQY | Negative |
| P29957 | LSLGLLLPSIATATPTTFVH | Negative |
| P29957 | ATPTTFVHLFEWNWQDVAQE | Negative |
| P29957 | PTTFVHLFEWNWQDVAQECE | Negative |
| P29957 | TTAGLSLGLLLPSIATATPT | Negative |
| P29957 | TAGLSLGLLLPSIATATPTT | Negative |
| P29957 | KIITTAGLSLGLLLPSIATA | Negative |
| P29957 | SLGLLLPSIATATPTTFVHL | Negative |
| P29957 | PSIATATPTTFVHLFEWNWQ | Negative |
| P29957 | LGLLLPSIATATPTTFVHLF | Negative |
| P29957 | LNKIITTAGLSLGLLLPSIA | Negative |
| P29957 | TATPTTFVHLFEWNWQDVAQ | Negative |
| P29957 | ATATPTTFVHLFEWNWQDVA | Negative |
| P30040 | LSPLLPLLLGFLLLSAPHGG | Negative |
| P30040 | GGSGLHTKGALPLDTVTFYK | Negative |
| P30040 | GFLLLSAPHGGSGLHTKGAL | Negative |
| P30040 | APHGGSGLHTKGALPLDVT  | Negative |
| P30040 | LPLLLGFLLLSAPHGGSLH  | Negative |
| P30040 | SPLLPLLLGFLLLSAPHGGS | Negative |
| P30040 | VPRAAFLSPLLPLLLGFLLL | Negative |
| P30040 | MAAAVPRAAFLSPLLPLLLG | Negative |
| P30040 | LLLGFLLLSAPHGGSGLHTK | Negative |
| P30040 | HGGSGLHTKGALPLDTVTFY | Negative |
| P30040 | RAAFLSPLLPLLLGFLLLSA | Negative |
| P30040 | FLSPLLPLLLGFLLLSAPHG | Negative |
| P30040 | GSGLHTKGALPLDTVTFYKV | Negative |
| P30040 | PRAAFLSPLLPLLLGFLLLS | Negative |

|        |                      |          |
|--------|----------------------|----------|
| P30040 | AAAVPRAAFLSPLLPLLLGF | Negative |
| P30040 | SAPHGGSGLHTKGALPLDTV | Negative |
| P30040 | AAVPRAAFLSPLLPLLLGFL | Negative |
| P30040 | LLPLLLGFLLLSAPHGGSGL | Negative |
| P30040 | AAFLSPLLPLLLGFLLLSAP | Negative |
| P30040 | AVPRAAFLSPLLPLLLGFLL | Negative |
| P30040 | LLLSAPHGGSGLHTKGALPL | Negative |
| P30040 | PLLLGFLLLSAPHGGSGLHT | Negative |
| P30040 | LGFLLLSAPHGGSGLHTKGA | Negative |
| P30040 | PHGGSGLHTKGALPLDTVTF | Negative |
| P30040 | LLSAPHGGSGLHTKGALPLD | Negative |
| P30040 | FLLSAPHGGSGLHTKGALP  | Negative |
| P30040 | AFLSPLLPLLLGFLLLSAPH | Negative |
| P30040 | LSAPHGGSGLHTKGALPLDT | Negative |
| P30040 | PLLPLLLGFLLLSAPHGGSG | Negative |
| P30101 | ALLAAARLAAASDVLELTD  | Negative |
| P30101 | LLAAARLAAASDVLELTDDN | Negative |
| P30101 | VLELTDDNFESRISDTGSAG | Negative |
| P30101 | AAARLAAASDVLELTDDNFE | Negative |
| P30101 | LAAARLAAASDVLELTDDNF | Negative |
| P30101 | AARLAAASDVLELTDDNFES | Negative |
| P30101 | LELTDDNFESRISDTGSAGL | Negative |
| P30101 | GVALLLAAARLAAASDVLEL | Negative |
| P30101 | VALLLAAARLAAASDVLELT | Negative |
| P30101 | ASDVLELTDDNFESRISDTG | Negative |
| P30101 | FPGVALLLAAARLAAASDVL | Negative |
| P30101 | LFPGVALLLAAARLAAASDV | Negative |
| P30101 | RLAAASDVLELTDDNFESRI | Negative |
| P30101 | SDVLELTDDNFESRISDTGS | Negative |
| P30101 | AASDVLELTDDNFESRISDT | Negative |
| P30101 | RLRRLALFPGVALLLAAARL | Negative |
| P30101 | ALFPGVALLLAAARLAAASD | Negative |
| P30101 | LRRLALFPGVALLLAAARLA | Negative |
| P30101 | RRLALFPGVALLLAAARLAA | Negative |
| P30101 | AAASDVLELTDDNFESRISD | Negative |
| P30101 | MRLRRLALFPGVALLLAAAR | Negative |
| P30101 | LAAASDVLELTDDNFESRIS | Negative |
| P30101 | LALFPGVALLLAAARLAAAS | Negative |
| P30101 | ELTDDNFESRISDTGSAGLM | Negative |
| P30101 | LTDDNFESRISDTGSAGLML | Negative |
| P30101 | ARLAAASDVLELTDDNFESR | Negative |
| P30101 | DVLELTDDNFESRISDTGSA | Negative |
| P30101 | LLLAAARLAAASDVLELTDD | Negative |
| P30101 | RLALFPGVALLLAAARLAAA | Negative |
| P30120 | SKACSCAPTHPQTAFCNSDL | Negative |
| P30120 | LSLIASSKACSCAPTHPQTA | Negative |

|        |                       |          |
|--------|-----------------------|----------|
| P30120 | THPQTAFCNNDLVIRAKFMG  | Negative |
| P30120 | ASSKACSCAPTHPQTAFCONS | Negative |
| P30120 | LLLLSLIASSKACSCAPTHP  | Negative |
| P30120 | SLASGILLLLSLIASSKACS  | Negative |
| P30120 | KACSCAPTHPQTAFCNNDLV  | Negative |
| P30120 | ACSCAPTHPQTAFCNNDLVI  | Negative |
| P30120 | LIASSKACSCAPTHPQTAF   | Negative |
| P30120 | APFASLASGILLLLSLIASS  | Negative |
| P30120 | SSKACSCAPTHPQTAFCONS  | Negative |
| P30120 | CSCAPTHPQTAFCNNDLVIR  | Negative |
| P30120 | FASLASGILLLLSLIASSKA  | Negative |
| P30120 | PFASLASGILLLLSLIASSK  | Negative |
| P30120 | IASSKACSCAPTHPQTAF    | Negative |
| P30120 | LLSLIASSKACSCAPTHPQ   | Negative |
| P30120 | HPQTAFCNNDLVIRAKFMGS  | Negative |
| P30120 | SLIASSKACSCAPTHPQTAF  | Negative |
| P30120 | MAPFASLASGILLLLSLIAS  | Negative |
| P30120 | SCAPTHPQTAFCNNDLVIRA  | Negative |
| P30120 | LASGILLLLSLIASSKACSC  | Negative |
| P30120 | GILLLLSLIASSKACSCAPT  | Negative |
| P30120 | APTHPQTAFCNNDLVIRAKF  | Negative |
| P30120 | ILLLLSLIASSKACSCAPTH  | Negative |
| P30120 | LLSLIASSKACSCAPTHPQT  | Negative |
| P30120 | CAPTHPQTAFCNNDLVIRAK  | Negative |
| P30120 | ASLASGILLLLSLIASSKAC  | Negative |
| P30120 | PTHPQTAFCNNDLVIRAKFM  | Negative |
| P30120 | ASGILLLLSLIASSKACSCA  | Negative |
| P30122 | YTEGGFVEGVNKKLSLFGDS  | Negative |
| P30122 | SPGCLAVASAAKLGSVYTEG  | Negative |
| P30122 | GASRLGPSPGCLAVASAAKL  | Negative |
| P30122 | KLGSVYTEGGFVEGVNKKLS  | Negative |
| P30122 | SVYTEGGFVEGVNKKLSLFG  | Negative |
| P30122 | ASRLGPSPGCLAVASAAKLG  | Negative |
| P30122 | AKLGSVYTEGGFVEGVNKKL  | Negative |
| P30122 | GFVEGVNKKLSLFGDSIDIF  | Negative |
| P30122 | VASAAKLGSVYTEGGFVEGV  | Negative |
| P30122 | TEGGFVEGVNKKLSLFGDSI  | Negative |
| P30122 | LGSPGCLAVASAAKLGSVY   | Negative |
| P30122 | PGCLAVASAAKLGSVYTEGG  | Negative |
| P30122 | GGFVEGVNKKLSLFGDSIDI  | Negative |
| P30122 | LGASRLGPSPGCLAVASAAK  | Negative |
| P30122 | CLAVASAAKLGSVYTEGGFV  | Negative |
| P30122 | LAVASAAKLGSVYTEGGFVE  | Negative |
| P30122 | FVEGVNKKLSLFGDSIDIFK  | Negative |
| P30122 | LGSVYTEGGFVEGVNKKLSL  | Negative |
| P30122 | VYTEGGFVEGVNKKLSLFGD  | Negative |

|        |                      |          |
|--------|----------------------|----------|
| P30122 | AVASAAKLGSVYTEGGFVEG | Negative |
| P30122 | GPSPGCLAVASAAKLGSVYT | Negative |
| P30122 | ASAAKLGSVYTEGGFVEGVN | Negative |
| P30122 | GSVYTEGGFVEGVNKKLSLF | Negative |
| P30122 | SAAKLGSVYTEGGFVEGVNK | Negative |
| P30122 | GCLAVASAAKLGSVYTEGGF | Negative |
| P30122 | EGGFVEGVNKKLSLFGDSID | Negative |
| P30122 | AAKLGSVYTEGGFVEGVNKK | Negative |
| P30122 | RLGPSPGCLAVASAAKLGSV | Negative |
| P30122 | PSPGCLAVASAAKLGSVYTE | Negative |
| P30130 | LAGFFVRLVVACAFAAQAPL | Negative |
| P30130 | LRLYQRNTQCLHIRKHRLAG | Negative |
| P30130 | HRLAGFFVRLVVACAFAAQ  | Negative |
| P30130 | FVRLVVACAFAAQAPLSSAD | Negative |
| P30130 | RLAGFFVRLVVACAFAAQAP | Negative |
| P30130 | FFVRLVVACAFAAQAPLSSA | Negative |
| P30130 | NTQCLHIRKHRLAGFFVRLV | Negative |
| P30130 | YLNRLYQRNTQCLHIRKHR  | Negative |
| P30130 | QRNTQCLHIRKHRLAGFFVR | Negative |
| P30130 | NRLYQRNTQCLHIRKHRLA  | Negative |
| P30130 | IRKHRLAGFFVRLVVACAFA | Negative |
| P30130 | KHRLAGFFVRLVVACAFAAQ | Negative |
| P30130 | AGFFVRLVVACAFAAQAPLS | Negative |
| P30130 | LHIRKHRLAGFFVRLVVACA | Negative |
| P30130 | LYQRNTQCLHIRKHRLAGFF | Negative |
| P30130 | RLYQRNTQCLHIRKHRLAGF | Negative |
| P30130 | QCLHIRKHRLAGFFVRLVVA | Negative |
| P30130 | GFFVRLVVACAFAAQAPLSS | Negative |
| P30130 | VRLVVACAFAAQAPLSSADL | Negative |
| P30130 | LNRLYQRNTQCLHIRKHRL  | Negative |
| P30130 | TQCLHIRKHRLAGFFVRLVV | Negative |
| P30130 | RKHRLAGFFVRLVVACAFAA | Negative |
| P30130 | SYLNRLYQRNTQCLHIRKH  | Negative |
| P30130 | CLHIRKHRLAGFFVRLVVAC | Negative |
| P30130 | RLVVACAFAAQAPLSSADLY | Negative |
| P30130 | RNTQCLHIRKHRLAGFFVRL | Negative |
| P30130 | MSYLNRLYQRNTQCLHIRK  | Negative |
| P30130 | YQRNTQCLHIRKHRLAGFFV | Negative |
| P30130 | LVVACAFAAQAPLSSADLYF | Negative |
| P30130 | HIRKHRLAGFFVRLVVACAF | Negative |
| P30224 | APMVVEAQKLCERPSGTWSG | Negative |
| P30224 | SATIVTLFFAALVFFAALEA | Negative |
| P30224 | LEAPMVVEAQKLCERPSGTW | Negative |
| P30224 | FFAALVFFAALEAPMVVEAQ | Negative |
| P30224 | QKLCERPSGTWSGVCGNSNA | Negative |
| P30224 | AQKLCERPSGTWSGVCGNSN | Negative |



|        |                       |          |
|--------|-----------------------|----------|
| P30224 | AKSATIVTLFFAALVFFAAL  | Negative |
| P30224 | ALVFFAALEAPMVVEAQKLC  | Negative |
| P30224 | EAPMVVEAQKLCERPSGTWS  | Negative |
| P30224 | MAKSATIVTLFFAALVFFAA  | Negative |
| P30224 | ALEAPMVVEAQKLCERPSGT  | Negative |
| P30224 | FAALVFFAALEAPMVVEAQK  | Negative |
| P30224 | TIVTLFFAALVFFAALEAPM  | Negative |
| P30224 | LVFFAALVFFAALEAPMVVEA | Negative |
| P30224 | VFFAALEAPMVVEAQKLCER  | Negative |
| P30224 | VTLFFAALVFFAALEAPMVV  | Negative |
| P30224 | FAALEAPMVVEAQKLCERPS  | Negative |
| P30224 | AALEAPMVVEAQKLCERPSG  | Negative |
| P30224 | VVEAQKLCERPSGTWSGVC   | Negative |
| P30224 | TLFFAALVFFAALEAPMVVE  | Negative |
| P30224 | KSATIVTLFFAALVFFAALE  | Negative |
| P30224 | MVVEAQKLCERPSGTWSGVC  | Negative |
| P30224 | AALVFFAALEAPMVVEAQKL  | Negative |
| P30224 | FFAALEAPMVVEAQKLCERP  | Negative |
| P30224 | IVTLFFAALVFFAALEAPMV  | Negative |
| P30224 | VEAQKLCERPSGTWSGVC    | Negative |
| P30224 | EAQKLCERPSGTWSGVC     | Negative |
| P30224 | ATIVTLFFAALVFFAALEAP  | Negative |
| P30224 | PMVVEAQKLCERPSGTWSGV  | Negative |
| P30230 | LFVALVVFAAFEPTMVEAQ   | Negative |
| P30230 | ASIIVLLFVALVVFAAFEPT  | Negative |
| P30230 | EAQKLCQRPSGTWSGVC     | Negative |
| P30230 | AFEPTMVEAQKLCQRPSGT   | Negative |
| P30230 | SIIVLLFVALVVFAAFEPT   | Negative |
| P30230 | VALVVFAAFEPTMVEAQKL   | Negative |
| P30230 | LLFVALVVFAAFEPTMVEA   | Negative |
| P30230 | FEEPTMVEAQKLCQRPSGTW  | Negative |
| P30230 | ALVVFAAFEPTMVEAQKLC   | Negative |
| P30230 | IVLLFVALVVFAAFEPTMV   | Negative |
| P30230 | VVFAAFEPTMVEAQKLCQR   | Negative |
| P30230 | TMVEAQKLCQRPSGTWSGVC  | Negative |
| P30230 | FAAFEPTMVEAQKLCQRPS   | Negative |
| P30230 | AAFEPTMVEAQKLCQRPSG   | Negative |
| P30230 | IIVLLFVALVVFAAFEPTM   | Negative |
| P30230 | PTMVEAQKLCQRPSGTWSGV  | Negative |
| P30230 | AQKLCQRPSGTWSGVC      | Negative |
| P30230 | QKLCQRPSGTWSGVC       | Negative |
| P30230 | EEPTMVEAQKLCQRPSGTWS  | Negative |
| P30230 | AKFASIIVLLFVALVVFAAF  | Negative |
| P30230 | MAKFASIIVLLFVALVVFAA  | Negative |
| P30230 | FASIIVLLFVALVVFAAFEE  | Negative |
| P30230 | EPTMVEAQKLCQRPSGTWSG  | Negative |

|        |                       |          |
|--------|-----------------------|----------|
| P30230 | VFAAFEEPTMVEAQKLCQRP  | Negative |
| P30230 | VLLFVALVVFAAFEEPTMVE  | Negative |
| P30230 | KFASIIVLLFVALVVFAAFE  | Negative |
| P30230 | VEAQKLCQRPSGTWSGVCGN  | Negative |
| P30230 | FVALVVFAAFEEPTMVEAQK  | Negative |
| P30230 | MVEAQKLCQRPSGTWSGVCG  | Negative |
| P30348 | NAVLVLLLLLATNHQGTGVV  | Negative |
| P30348 | QGTGVVVASELRCQCLTTL   | Negative |
| P30348 | VLLLLLATNHQGTGVVVASE  | Negative |
| P30348 | LLNAVLVLLLLLATNHQGTG  | Negative |
| P30348 | HQGTGVVVASELRCQCLTTL  | Negative |
| P30348 | TNHQGTGVVVASELRCQCLT  | Negative |
| P30348 | LLLLATNHQGTGVVVASELR  | Negative |
| P30348 | VASELRCQCLTTLPRVDFKN  | Negative |
| P30348 | VLVLLLLLATNHQGTGVVVA  | Negative |
| P30348 | LLLLLATNHQGTGVVVASEL  | Negative |
| P30348 | LNAVLVLLLLLATNHQGTGV  | Negative |
| P30348 | QLLNAVLVLLLLLATNHQGT  | Negative |
| P30348 | MAPPTRQLLNAVLVLLLLLA  | Negative |
| P30348 | TRQLLNAVLVLLLLLATNHQ  | Negative |
| P30348 | RQLLNAVLVLLLLLATNHQG  | Negative |
| P30348 | PTRQLLNAVLVLLLLLATNH  | Negative |
| P30348 | APPTRQLLNAVLVLLLLLAT  | Negative |
| P30348 | LLATNHQGTGVVVASELRCQ  | Negative |
| P30348 | ATNHQGTGVVVASELRCQCL  | Negative |
| P30348 | VVVASELRCQCLTTLPRVDF  | Negative |
| P30348 | VVASELRCQCLTTLPRVDFK  | Negative |
| P30348 | TGVVVASELRCQCLTTLPRV  | Negative |
| P30348 | GVVVASELRCQCLTTLPRVD  | Negative |
| P30348 | AVLVLLLLLATNHQGTGVVV  | Negative |
| P30348 | PPTRQLLNAVLVLLLLLATN  | Negative |
| P30348 | LATNHQGTGVVVASELRCQC  | Negative |
| P30348 | GTGVVVASELRCQCLTTLPR  | Negative |
| P30348 | LVLLLLLATNHQGTGVVVAS  | Negative |
| P30348 | NHQGTGVVVASELRCQCLTT  | Negative |
| P30438 | LLISGGNCEICPAVKRDVD   | Negative |
| P30438 | WAALLISGGNCEICPAVKR   | Negative |
| P30438 | CVLVLLWAALLISGGNCEI   | Negative |
| P30438 | LVLLWAALLISGGNCEICP   | Negative |
| P30438 | KRDVDLFLTGTTPDEYVEQVA | Negative |
| P30438 | GACVLVLLWAALLISGGNC   | Negative |
| P30438 | NCEICPAVKRDVDLFLTGTTP | Negative |
| P30438 | MKGACVLVLLWAALLISGG   | Negative |
| P30438 | CEICPAVKRDVDLFLTGTTPD | Negative |
| P30438 | VLVLLWAALLISGGNCEIC   | Negative |
| P30438 | ICPAVKRDVDLFLTGTTPDEY | Negative |

|        |                      |          |
|--------|----------------------|----------|
| P30438 | ACVLVLLWAALLISGGNCE  | Negative |
| P30438 | LWAALLISGGNCEICPAVK  | Negative |
| P30438 | LLWAALLISGGNCEICPAV  | Negative |
| P30438 | AVKRDVDLFLTGTPDEYVEQ | Negative |
| P30438 | VKRDVDLFLTGTPDEYVEQV | Negative |
| P30438 | RDVDLFLTGTPDEYVEQVAQ | Negative |
| P30438 | ALLISGGNCEICPAVKRDV  | Negative |
| P30438 | AALLISGGNCEICPAVKRD  | Negative |
| P30438 | EICPAVKRDVDLFLTGTPDE | Negative |
| P30438 | PAVKRDVDLFLTGTPDEYVE | Negative |
| P30438 | SGGNCEICPAVKRDVDLFLT | Negative |
| P30438 | GNCEICPAVKRDVDLFLTGT | Negative |
| P30438 | ISGGNCEICPAVKRDVDLFL | Negative |
| P30438 | CPAVKRDVDLFLTGTPDEYV | Negative |
| P30438 | KGACVLVLLWAALLISGGN  | Negative |
| P30438 | LLISGGNCEICPAVKRDVDL | Negative |
| P30438 | LISGGNCEICPAVKRDVDLF | Negative |
| P30438 | GGNCEICPAVKRDVDLFLTG | Negative |
| P30440 | QALGVKMAETCPIFYDVFFA | Negative |
| P30440 | VKMAETCPIFYDVFFAVANG | Negative |
| P30440 | TQALGVKMAETCPIFYDVFF | Negative |
| P30440 | LVTQALGVKMAETCPIFYDV | Negative |
| P30440 | LGVKMAETCPIFYDVFFAVA | Negative |
| P30440 | VFFAVANGNELLLDLSLTKV | Negative |
| P30440 | ALLVLALLVTQALGVKMAET | Negative |
| P30440 | ALGVKMAETCPIFYDVFFAV | Negative |
| P30440 | MRGALLVLALLVTQALGVKM | Negative |
| P30440 | LALLVTQALGVKMAETCPIF | Negative |
| P30440 | RGALLVLALLVTQALGVKMA | Negative |
| P30440 | TCPIFYDVFFAVANGNELLL | Negative |
| P30440 | GVKMAETCPIFYDVFFAVAN | Negative |
| P30440 | KMAETCPIFYDVFFAVANGN | Negative |
| P30440 | PIFYDVFFAVANGNELLLDL | Negative |
| P30440 | ETCPIFYDVFFAVANGNELL | Negative |
| P30440 | VLALLVTQALGVKMAETCPI | Negative |
| P30440 | LVLALLVTQALGVKMAETCP | Negative |
| P30440 | MAETCPIFYDVFFAVANGNE | Negative |
| P30440 | CPIFYDVFFAVANGNELLLD | Negative |
| P30440 | YDVFFAVANGNELLLDLSLT | Negative |
| P30440 | FYDVFFAVANGNELLLDLSL | Negative |
| P30440 | LLVTQALGVKMAETCPIFYD | Negative |
| P30440 | IFYDVFFAVANGNELLLDLS | Negative |
| P30440 | AETCPIFYDVFFAVANGNEL | Negative |
| P30440 | DVFFAVANGNELLLDLSLTK | Negative |
| P30440 | LLVLALLVTQALGVKMAETC | Negative |
| P30440 | VTQALGVKMAETCPIFYDVF | Negative |

|        |                      |          |
|--------|----------------------|----------|
| P30440 | ALLVTQALGVKMAETCPIFY | Negative |
| P30659 | ATCQFRKAIDDCQKQAHHSN | Negative |
| P30659 | LAVFAFNVAEGCDATCQFRK | Negative |
| P30659 | MKQILLISLVVVLAVFAFNV | Negative |
| P30659 | KQILLISLVVVLAVFAFNVA | Negative |
| P30659 | QILLISLVVVLAVFAFNVAE | Negative |
| P30659 | FAFNVAEGCDATCQFRKAID | Negative |
| P30659 | AVFAFNVAEGCDATCQFRKA | Negative |
| P30659 | CQFRKAIDDCQKQAHHSNVL | Negative |
| P30659 | AEGCDATCQFRKAIDDCQKQ | Negative |
| P30659 | FRKAIDDCQKQAHHSNVLQT | Negative |
| P30659 | VVLAVFAFNVAEGCDATCQF | Negative |
| P30659 | TCQFRKAIDDCQKQAHHSNV | Negative |
| P30659 | CDATCQFRKAIDDCQKQAHH | Negative |
| P30659 | GCDATCQFRKAIDDCQKQAH | Negative |
| P30659 | LISLVVVLAVFAFNVAEGCD | Negative |
| P30659 | ISLVVVLAVFAFNVAEGCDA | Negative |
| P30659 | DATCQFRKAIDDCQKQAHHS | Negative |
| P30659 | QFRKAIDDCQKQAHHSNVLQ | Negative |
| P30659 | VLAVFAFNVAEGCDATCQFR | Negative |
| P30659 | VAEGCDATCQFRKAIDDCQK | Negative |
| P30659 | NVAEGCDATCQFRKAIDDCQ | Negative |
| P30659 | AFNVAEGCDATCQFRKAIDD | Negative |
| P30659 | VFAFNVAEGCDATCQFRKAI | Negative |
| P30659 | EGCDATCQFRKAIDDCQKQA | Negative |
| P30659 | ILLISLVVVLAVFAFNVAEG | Negative |
| P30659 | LLISLVVVLAVFAFNVAEGC | Negative |
| P30659 | VVVLAVFAFNVAEGCDATCQ | Negative |
| P30659 | FNVAEGCDATCQFRKAIDDC | Negative |
| P30659 | SLVVVLAVFAFNVAEGCDAT | Negative |
| P30859 | ALIAGFSLSATAAETIRFAT | Negative |
| P30859 | LSATAAETIRFATEASYPPF | Negative |
| P30859 | MKKVLIAALIAGFSLSATAA | Negative |
| P30859 | KKVLIAALIAGFSLSATAAE | Negative |
| P30859 | GFSLSATAAETIRFATEASY | Negative |
| P30859 | AGFSLSATAAETIRFATEAS | Negative |
| P30859 | IRFATEASYPPFESIDANNQ | Negative |
| P30859 | ETIRFATEASYPPFESIDAN | Negative |
| P30859 | SYPPFESIDANNQIVGFDVD | Negative |
| P30859 | TAAETIRFATEASYPPFESI | Negative |
| P30859 | TEASYPPFESIDANNQIVGF | Negative |
| P30859 | TIRFATEASYPPFESIDANN | Negative |
| P30859 | IAALIAGFSLSATAAETIRF | Negative |
| P30859 | AAETIRFATEASYPPFESID | Negative |
| P30859 | VLIAALIAGFSLSATAAETI | Negative |
| P30859 | FATEASYPPFESIDANNQIV | Negative |

|        |                       |          |
|--------|-----------------------|----------|
| P30859 | SATAAETIRFATEASYPPFE  | Negative |
| P30859 | EASYPPFESIDANNQIVGFD  | Negative |
| P30859 | IAGFSLSATAAETIRFATEA  | Negative |
| P30859 | AETIRFATEASYPPFESIDA  | Negative |
| P30859 | ATAAETIRFATEASYPPFES  | Negative |
| P30859 | ATEASYPPFESIDANNQIVG  | Negative |
| P30859 | AALIAGFSLSATAAETIRFA  | Negative |
| P30859 | KVLIAALIAGFSLSATAAET  | Negative |
| P30859 | LIAGFSLSATAAETIRFATE  | Negative |
| P30859 | ASYPPFESIDANNQIVGFDV  | Negative |
| P30859 | SLSATAAETIRFATEASYPP  | Negative |
| P30859 | RFATEASYPPFESIDANNQI  | Negative |
| P30859 | FSLSATAAETIRFATEASYP  | Negative |
| P30860 | FGVSATYPPFESIGANNEIV  | Negative |
| P30860 | GVSATYPPFESIGANNEIVG  | Negative |
| P30860 | LAALLASFTFGASAAEKINF  | Negative |
| P30860 | ASAAEKINFGVSATYPPFES  | Negative |
| P30860 | FGASAAEKINFGVSATYPPF  | Negative |
| P30860 | KLVLAAALLASFTFGASAAEK | Negative |
| P30860 | EKINFGVSATYPPFESIGAN  | Negative |
| P30860 | FTFGASAAEKINFGVSATYP  | Negative |
| P30860 | TFGASAAEKINFGVSATYPP  | Negative |
| P30860 | AALLASFTFGASAAEKINFG  | Negative |
| P30860 | AEKINFGVSATYPPFESIGA  | Negative |
| P30860 | LASFTFGASAAEKINFGVSA  | Negative |
| P30860 | SAAEKINFGVSATYPPFESI  | Negative |
| P30860 | TYPPFESIGANNEIVGFDID  | Negative |
| P30860 | LVLAAALLASFTFGASAAEKI | Negative |
| P30860 | KINFGVSATYPPFESIGANN  | Negative |
| P30860 | INFGVSATYPPFESIGANNE  | Negative |
| P30860 | GASAAEKINFGVSATYPPFE  | Negative |
| P30860 | VSATYPPFESIGANNEIVGF  | Negative |
| P30860 | SATYPPFESIGANNEIVGFD  | Negative |
| P30860 | ATYPPFESIGANNEIVGFDI  | Negative |
| P30860 | ASFTFGASAAEKINFGVSAT  | Negative |
| P30860 | SFTFGASAAEKINFGVSATY  | Negative |
| P30860 | ALLASFTFGASAAEKINFGV  | Negative |
| P30860 | MKKLVLAALLASFTFGASAA  | Negative |
| P30860 | AAEKINFGVSATYPPFESIG  | Negative |
| P30860 | KKLVLAALLASFTFGASAAE  | Negative |
| P30860 | LLASFTFGASAAEKINFGVS  | Negative |
| P30860 | NFGVSATYPPFESIGANNEI  | Negative |
| P30919 | RKWNLPFLLLPLVLGIPLVR  | Negative |
| P30919 | NLPFLLLPLVLGIPLVRGSN  | Negative |
| P30919 | NPLPLVVNTWPFGKNATEAAW | Negative |
| P30919 | VRGSNPLPLVVNTWPFGKNAT | Negative |

|        |                      |          |
|--------|----------------------|----------|
| P30919 | LPFLLLPLVLGIPLVRGSNP | Negative |
| P30919 | LVRGSNPLPLVVNTWPFKNA | Negative |
| P30919 | LGIPLVRGSNPLPLVVNTWP | Negative |
| P30919 | KWNLPFLLLPLVLGIPLVRG | Negative |
| P30919 | SNPLPLVVNTWPFKNATEAA | Negative |
| P30919 | PLVVNTWPFKNATEAAWWTL | Negative |
| P30919 | LLLPLVLGIPLVRGSNPLPL | Negative |
| P30919 | VVNTWPFKNATEAAWWTLVS | Negative |
| P30919 | LPLVLGIPLVRGSNPLPLVV | Negative |
| P30919 | RGSNPLPLVVNTWPFKNATE | Negative |
| P30919 | GSNPLPLVVNTWPFKNATEA | Negative |
| P30919 | GIPLVRGSNPLPLVVNTWPF | Negative |
| P30919 | MARKWNLPFLLLPLVLGIPL | Negative |
| P30919 | LLPLVLGIPLVRGSNPLPLV | Negative |
| P30919 | PLPLVVNTWPFKNATEAAWW | Negative |
| P30919 | PFLLLPLVLGIPLVRGSNPL | Negative |
| P30919 | LVLGIPLVRGSNPLPLVVNT | Negative |
| P30919 | IPLVRGSNPLPLVVNTWPFK | Negative |
| P30919 | PLVRGSNPLPLVVNTWPFKN | Negative |
| P30919 | WNLPFLLLPLVLGIPLVRGS | Negative |
| P30919 | LVVNTWPFKNATEAAWWTLV | Negative |
| P30919 | VLGIPLVRGSNPLPLVVNTW | Negative |
| P30919 | LPLVVNTWPFKNATEAAWWT | Negative |
| P30919 | PLVLGIPLVRGSNPLPLVVN | Negative |
| P30919 | ARKWNLPFLLLPLVLGIPLV | Negative |
| P30921 | SLLGPAHAAPDTSVSNKQNF | Negative |
| P30921 | APDTSVSNKQNFSTDVIYQI | Negative |
| P30921 | SLALSLLGPAHAAPDTSVSN | Negative |
| P30921 | ALALSLSLALSLLGPAHAAP | Negative |
| P30921 | LALSLSLALSLLGPAHAAPD | Negative |
| P30921 | DTSVSNKQNFSTDVIYQIFT | Negative |
| P30921 | LSLLGPAHAAPDTSVSNKQN | Negative |
| P30921 | GPAHAAPDTSVSNKQNFSTD | Negative |
| P30921 | ALSLSLALSLLGPAHAAPDT | Negative |
| P30921 | ALSLLGPAHAAPDTSVSNKQ | Negative |
| P30921 | LLGPAHAAPDTSVSNKQNFS | Negative |
| P30921 | PDTSVSNKQNFSTDVIYQIF | Negative |
| P30921 | LGPAHAAPDTSVSNKQNFST | Negative |
| P30921 | AHAAPDTSVSNKQNFSTDVI | Negative |
| P30921 | MKKISKLTALALSLSLALS  | Negative |
| P30921 | HAAPDTSVSNKQNFSTDVIY | Negative |
| P30921 | KLTTALALSLSLALSLLGPA | Negative |
| P30921 | KKISKLTALALSLSLALS   | Negative |
| P30921 | SKLTTALALSLSLALSLLGP | Negative |
| P30921 | AAPDTSVSNKQNFSTDVIYQ | Negative |
| P30921 | ISKLTALALSLSLALSLLG  | Negative |

|        |                      |          |
|--------|----------------------|----------|
| P30921 | LALSLLGPAHAAPDTSVSNK | Negative |
| P30921 | LSLALSLLGPAHAAPDTSVS | Negative |
| P30921 | LTTALALSLSLALSLLGPAH | Negative |
| P30921 | SLSLALSLLGPAHAAPDTSV | Negative |
| P30921 | KISKLTALALSLSLALSLL  | Negative |
| P30921 | PAHAAPDTSVSNKQNFSTDV | Negative |
| P30921 | TTALALSLSLALSLLGPAHA | Negative |
| P30921 | TALALSLSLALSLLGPAHAA | Negative |
| P30922 | VLLQSCAAYKLICYTWSQ   | Negative |
| P30922 | YYTWSQYREGDGSCFPDAI  | Negative |
| P30922 | VVLVLLQSCAAYKLICYTS  | Negative |
| P30922 | GLRAAHTGFVVLVLLQSCAA | Negative |
| P30922 | LRAAHTGFVVLVLLQSCAAY | Negative |
| P30922 | CAAYKLICYTWSQYREGD   | Negative |
| P30922 | CYYTWSQYREGDGSCFPDA  | Negative |
| P30922 | MGLRAAHTGFVVLVLLQSCA | Negative |
| P30922 | YTWSQYREGDGSCFPDAID  | Negative |
| P30922 | QSCAAYKLICYTWSQYRE   | Negative |
| P30922 | TGFVVLVLLQSCAAYKLICY | Negative |
| P30922 | ICYTWSQYREGDGSCFPD   | Negative |
| P30922 | YKLICYTWSQYREGDGSC   | Negative |
| P30922 | TSWSQYREGDGSCFPDAIDP | Negative |
| P30922 | VLVLLQSCAAYKLICYTSW  | Negative |
| P30922 | KLICYTWSQYREGDGSCF   | Negative |
| P30922 | GFVVLVLLQSCAAYKLICY  | Negative |
| P30922 | AHTGFVVLVLLQSCAAYKLI | Negative |
| P30922 | FVVLVLLQSCAAYKLICYT  | Negative |
| P30922 | AYKLICYTWSQYREGDGS   | Negative |
| P30922 | LLQSCAAYKLICYTWSQY   | Negative |
| P30922 | SCAAYKLICYTWSQYREG   | Negative |
| P30922 | LQSCAAYKLICYTWSQYR   | Negative |
| P30922 | LICYTWSQYREGDGSCFP   | Negative |
| P30922 | LVLLQSCAAYKLICYTWS   | Negative |
| P30922 | AAHTGFVVLVLLQSCAAYKL | Negative |
| P30922 | AAYKLICYTWSQYREGDG   | Negative |
| P30922 | SWSQYREGDGSCFPDAIDPF | Negative |
| P30922 | RAAHTGFVVLVLLQSCAAYK | Negative |
| P31025 | LLAVSLGLIAALQAHLLAS  | Negative |
| P31025 | SLGLIAALQAHLLASDEEI  | Negative |
| P31025 | AVSLGLIAALQAHLLASDE  | Negative |
| P31025 | AHLLASDEEIQDVSGTWYL  | Negative |
| P31025 | LIAALQAHLLASDEEIQDV  | Negative |
| P31025 | EEIQDVSGTWYLKAMTVDRE | Negative |
| P31025 | VSLGLIAALQAHLLASDEE  | Negative |
| P31025 | AALQAHLLASDEEIQDVSG  | Negative |
| P31025 | QAHLLASDEEIQDVSGTWY  | Negative |

|        |                      |          |
|--------|----------------------|----------|
| P31025 | LAVSLGLIAALQAHHLLASD | Negative |
| P31025 | LQAHHLLASDEEIQDVSGTW | Negative |
| P31025 | QDVSGTWYLKAMTVDREFPE | Negative |
| P31025 | DEEIQDVSGTWYLKAMTVDR | Negative |
| P31025 | HHLLASDEEIQDVSGTWYLK | Negative |
| P31025 | SDEEIQDVSGTWYLKAMTVD | Negative |
| P31025 | IAALQAHHLLASDEEIQDVS | Negative |
| P31025 | ALQAHHLLASDEEIQDVSGT | Negative |
| P31025 | HLLASDEEIQDVSGTWYLKA | Negative |
| P31025 | LASDEEIQDVSGTWYLKAMT | Negative |
| P31025 | PLLLAVSLGLIAALQAHHLL | Negative |
| P31025 | DVSGTWYLKAMTVDREFPEM | Negative |
| P31025 | EIQDVSGTWYLKAMTVDREF | Negative |
| P31025 | GLIAALQAHHLLASDEEIQD | Negative |
| P31025 | IQDVSGTWYLKAMTVDREFP | Negative |
| P31025 | KPLLLAVSLGLIAALQAHHL | Negative |
| P31025 | MKPLLLAVSLGLIAALQAHH | Negative |
| P31025 | ASDEEIQDVSGTWYLKAMTV | Negative |
| P31025 | LGLIAALQAHHLLASDEEIQ | Negative |
| P31025 | LLASDEEIQDVSGTWYLKAM | Negative |
| P31083 | LGFAPQASADVAGLTPCSES | Negative |
| P31083 | DVAGLTPCSESPRFIQRAEA | Negative |
| P31083 | QASADVAGLTPCSESPRFIQ | Negative |
| P31083 | MRRLFAVVLAACLWLGFAQP | Negative |
| P31083 | AACLWLGFAQPASADVAGLT | Negative |
| P31083 | ADVAGLTPCSESPRFIQRAE | Negative |
| P31083 | WLGFAQPASADVAGLTPCSE | Negative |
| P31083 | RRLFAVVLAACLWLGFAQQA | Negative |
| P31083 | RLFAVVLAACLWLGFAQPAS | Negative |
| P31083 | SADVAGLTPCSESPRFIQRA | Negative |
| P31083 | LTPCSESPRFIQRAEAAATP | Negative |
| P31083 | VAGLTPCSESPRFIQRAEAA | Negative |
| P31083 | ACLWLGFAQPASADVAGLTP | Negative |
| P31083 | TPCSESPRFIQRAEAAATPQ | Negative |
| P31083 | PQASADVAGLTPCSESPRFI | Negative |
| P31083 | AVVLAACLWLGFAQPASADV | Negative |
| P31083 | GFAPQASADVAGLTPCSESP | Negative |
| P31083 | PCSESPRFIQRAEAAATPQA | Negative |
| P31083 | FAPQASADVAGLTPCSESPR | Negative |
| P31083 | AGLTPCSESPRFIQRAEAAA | Negative |
| P31083 | GLTPCSESPRFIQRAEAAAT | Negative |
| P31083 | LWLGFAQPASADVAGLTPCS | Negative |
| P31083 | CLWLGFAQPASADVAGLTPC | Negative |
| P31083 | VVLAACLWLGFAQPASADVA | Negative |
| P31083 | LFAVVLAACLWLGFAQPASA | Negative |
| P31083 | ASADVAGLTPCSESPRFIQR | Negative |



|        |                       |          |
|--------|-----------------------|----------|
| P31083 | VLAACLWLGFAPQASADVAG  | Negative |
| P31083 | APQASADVAGLTPCSESPRF  | Negative |
| P31083 | FAVVLAACLWLGFAPQASAD  | Negative |
| P31096 | PVKPTSSGSSEEKQLNNKYP  | Negative |
| P31096 | GIASALPVKPTSSGSSEEKQ  | Negative |
| P31096 | VKPTSSGSSEEKQLNNKYPD  | Negative |
| P31096 | ASALPVKPTSSGSSEEKQLN  | Negative |
| P31096 | EKQLNNKYPDAVATWLKPDP  | Negative |
| P31096 | FCLLGIASALPVKPTSSGSS  | Negative |
| P31096 | SSGSSEEKQLNNKYPDAVAT  | Negative |
| P31096 | SALPVKPTSSGSSEEKQLNN  | Negative |
| P31096 | KPTSSGSSEEKQLNNKYPDA  | Negative |
| P31096 | TSSGSSEEKQLNNKYPDAVA  | Negative |
| P31096 | GSSEEKQLNNKYPDAVATWL  | Negative |
| P31096 | SGSSEEKQLNNKYPDAVATW  | Negative |
| P31096 | LGIASALPVKPTSSGSSEEK  | Negative |
| P31096 | SEEKQLNNKYPDAVATWLKP  | Negative |
| P31096 | IASALPVKPTSSGSSEEKQL  | Negative |
| P31096 | EEKQLNNKYPDAVATWLKPD  | Negative |
| P31096 | LLGIASALPVKPTSSGSSEE  | Negative |
| P31096 | PTSSGSSEEKQLNNKYPDAV  | Negative |
| P31096 | SSEEKQLNNKYPDAVATWLK  | Negative |
| P31096 | CLLGIASALPVKPTSSGSSE  | Negative |
| P31096 | CFCLLGIASALPVKPTSSGS  | Negative |
| P31096 | LPVKPTSSGSSEEKQLNNKY  | Negative |
| P31096 | ALPVKPTSSGSSEEKQLNNK  | Negative |
| P31096 | MRIAVICFCLLGIASALPVK  | Negative |
| P31096 | KQLNNKYPDAVATWLKPDPS  | Negative |
| P31096 | AVICFCLLGIASALPVKPTS  | Negative |
| P31096 | IAVICFCLLGIASALPVKPT  | Negative |
| P31096 | ICFCLLGIASALPVKPTSSG  | Negative |
| P31096 | VICFCLLGIASALPVKPTSS  | Negative |
| P31110 | AGGANAATFTITNRCSFTVW  | Negative |
| P31110 | GANAAATFTITNRCSFTVWPA | Negative |
| P31110 | ATFTITNRCSFTVWPAATPV  | Negative |
| P31110 | FTITNRCSFTVWPAATPVGG  | Negative |
| P31110 | ATLAAGGANAATFTITNRCS  | Negative |
| P31110 | MASPATSSAVLVVVLVATLA  | Negative |
| P31110 | TLAAGGANAATFTITNRCSF  | Negative |
| P31110 | TSSAVLVVVLVATLAAGGAN  | Negative |
| P31110 | VVLVATLAAGGANAATFTIT  | Negative |
| P31110 | ATSSAVLVVVLVATLAAGGA  | Negative |
| P31110 | SPATSSAVLVVVLVATLAAG  | Negative |
| P31110 | LVVVLVATLAAGGANAATFT  | Negative |
| P31110 | AVLVVVLVATLAAGGANAAT  | Negative |
| P31110 | LVATLAAGGANAATFTITNR  | Negative |

|        |                      |          |
|--------|----------------------|----------|
| P31110 | ASPATSSAVLVVVLVATLAA | Negative |
| P31110 | AAGGANAATFTITNRCSFTV | Negative |
| P31110 | VLVATLAAGGANAATFTITN | Negative |
| P31110 | LAAGGANAATFTITNRCSFT | Negative |
| P31110 | SSAVLVVVLVATLAAGGANA | Negative |
| P31110 | TFTITNRCSFTVWPAATPVG | Negative |
| P31110 | ANAATFTITNRCSFTVWPAA | Negative |
| P31110 | GGANAATFTITNRCSFTVWP | Negative |
| P31110 | SAVLVVVLVATLAAGGANAA | Negative |
| P31110 | PATSSAVLVVVLVATLAAGG | Negative |
| P31110 | TITNRCSFTVWPAATPVGGG | Negative |
| P31110 | VLVVVLVATLAAGGANAATF | Negative |
| P31110 | AATFTITNRCSFTVWPAATP | Negative |
| P31110 | NAATFTITNRCSFTVWPAAT | Negative |
| P31110 | VATLAAGGANAATFTITNRC | Negative |
| P31133 | KKWLSGLVAGALMAVSVGTL | Negative |
| P31133 | VSVGTLAAEQKTLHIYNWSD | Negative |
| P31133 | TALNKKWLSGLVAGALMAVS | Negative |
| P31133 | VAGALMAVSVGTLAAEQKTL | Negative |
| P31133 | QKTLHIYNWSDYIAPDTVAN | Negative |
| P31133 | MTALNKKWLSGLVAGALMAV | Negative |
| P31133 | GTAAEQKTLHIYNWSDYIA  | Negative |
| P31133 | EQKTLHIYNWSDYIAPDTVA | Negative |
| P31133 | AAEQKTLHIYNWSDYIAPDT | Negative |
| P31133 | SVGTLAAEQKTLHIYNWSDY | Negative |
| P31133 | WLSGLVAGALMAVSVGTLAA | Negative |
| P31133 | KWLSGLVAGALMAVSVGTLA | Negative |
| P31133 | ALNKKWLSGLVAGALMAVSV | Negative |
| P31133 | VGTLAAEQKTLHIYNWSDYI | Negative |
| P31133 | NKKWLSGLVAGALMAVSVGT | Negative |
| P31133 | AEQKTLHIYNWSDYIAPDTV | Negative |
| P31133 | KTLHIYNWSDYIAPDTVANF | Negative |
| P31133 | LAAEQKTLHIYNWSDYIAPD | Negative |
| P31133 | TLAAEQKTLHIYNWSDYIAP | Negative |
| P31133 | SGLVAGALMAVSVGTLAAEQ | Negative |
| P31133 | LMAVSVGTLAAEQKTLHIYN | Negative |
| P31133 | LSGLVAGALMAVSVGTLAAE | Negative |
| P31133 | GALMAVSVGTLAAEQKTLHI | Negative |
| P31133 | MAVSVGTLAAEQKTLHIYNW | Negative |
| P31133 | GLVAGALMAVSVGTLAAEQK | Negative |
| P31133 | AGALMAVSVGTLAAEQKTLH | Negative |
| P31133 | LNKKWLSGLVAGALMAVSVG | Negative |
| P31133 | ALMAVSVGTLAAEQKTLHIY | Negative |
| P31133 | AVSVGTLAAEQKTLHIYNWS | Negative |
| P31211 | CTSGLWTAQASTNESSNSHR | Negative |
| P31211 | LCTSGLWTAQASTNESSNSH | Negative |

|        |                       |          |
|--------|-----------------------|----------|
| P31211 | ASTNESSNSHRGLAPTNVDF  | Negative |
| P31211 | QASTNESSNSHRGLAPTNVD  | Negative |
| P31211 | TAQASTNESSNSHRGLAPTN  | Negative |
| P31211 | WTAQASTNESSNSHRGLAPT  | Negative |
| P31211 | TNESSNSHRGLAPTNVDFAF  | Negative |
| P31211 | SGLWTAQASTNESSNSHRGL  | Negative |
| P31211 | NESSNSHRGLAPTNVDFAFN  | Negative |
| P31211 | SSNSHRGLAPTNVDFAFNLY  | Negative |
| P31211 | LALYTCLLWLCTSGLWTAQA  | Negative |
| P31211 | ESSNSHRGLAPTNVDFAFNL  | Negative |
| P31211 | GLWTAQASTNESSNSHRGLA  | Negative |
| P31211 | LWLCTSGLWTAQASTNESSN  | Negative |
| P31211 | TSGLWTAQASTNESSNSHRG  | Negative |
| P31211 | ALYTCLLWLCTSGLWTAQAS  | Negative |
| P31211 | TCLLWLCTSGLWTAQASTNE  | Negative |
| P31211 | AQASTNESSNSHRGLAPTNV  | Negative |
| P31211 | LWTAQASTNESSNSHRGLAP  | Negative |
| P31211 | LYTCLLWLCTSGLWTAQAST  | Negative |
| P31211 | SNSHRGLAPTNVDFAFNLYQ  | Negative |
| P31211 | YTCLLWLCTSGLWTAQASTN  | Negative |
| P31211 | MSLALYTCLLWLCTSGLWTA  | Negative |
| P31211 | STNESSNSHRGLAPTNVDFA  | Negative |
| P31211 | SLALYTCLLWLCTSGLWTAQ  | Negative |
| P31211 | NSHRGLAPTNVDFAFNLYQR  | Negative |
| P31211 | LLWLCTSGLWTAQASTNESS  | Negative |
| P31211 | WLCTSGLWTAQASTNESSNS  | Negative |
| P31211 | SHRGLAPTNVDFAFNLYQRL  | Negative |
| P31226 | SLSFAAPNAKQVRWCAISDL  | Negative |
| P31226 | VRWCAISDLEQKKCNDLVGS  | Negative |
| P31226 | FTIISLSFAAPNAKQVRWCA  | Negative |
| P31226 | QTALFFTIIISLSFAAPNAKQ | Negative |
| P31226 | TALFFTIIISLSFAAPNAKQV | Negative |
| P31226 | KQVRWCAISDLEQKKCNDLV  | Negative |
| P31226 | CAISDLEQKKCNDLVGSCNV  | Negative |
| P31226 | WCAISDLEQKKCNDLVGSCN  | Negative |
| P31226 | FAAPNAKQVRWCAISDLEQK  | Negative |
| P31226 | APNAKQVRWCAISDLEQKKC  | Negative |
| P31226 | MAPTFQTALFFTIIISLSFAA | Negative |
| P31226 | RWCAISDLEQKKCNDLVGSC  | Negative |
| P31226 | TIISLSFAAPNAKQVRWCAI  | Negative |
| P31226 | LSFAAPNAKQVRWCAISDLE  | Negative |
| P31226 | AISDLEQKKCNDLVGSCNVP  | Negative |
| P31226 | AKQVRWCAISDLEQKKCNDL  | Negative |
| P31226 | LFFTIIISLSFAAPNAKQVRW | Negative |
| P31226 | FFTIIISLSFAAPNAKQVRWC | Negative |
| P31226 | ALFFTIIISLSFAAPNAKQVR | Negative |

|        |                        |          |
|--------|------------------------|----------|
| P31226 | APTFQTALFFTHIISLSFAAP  | Negative |
| P31226 | ISLSFAAPNAKQVRWCAISD   | Negative |
| P31226 | NAKQVRWCAISDLEQKKCND   | Negative |
| P31226 | SFAAPNAKQVRWCAISDLEQ   | Negative |
| P31226 | TFQTALFFTHIISLSFAAPNA  | Negative |
| P31226 | IISLSFAAPNAKQVRWCAIS   | Negative |
| P31226 | QVRWCAISDLEQKKCNDLVG   | Negative |
| P31226 | AAPNAKQVRWCAISDLEQKK   | Negative |
| P31226 | PTFQTALFFTHIISLSFAAPN  | Negative |
| P31226 | PNAKQVRWCAISDLEQKKCN   | Negative |
| P31231 | GEDGLDFPEYDGEDRVIHIS   | Negative |
| P31231 | EYDGEDRVIHISLKNYKAAL   | Negative |
| P31231 | FPEYDGEDRVIHISLKNYKA   | Negative |
| P31231 | GPWLVLAAALCLSLANLGPRG  | Negative |
| P31231 | GPRGEDGLDFPEYDGEDRVI   | Negative |
| P31231 | LGPRGEDGLDFPEYDGEDRV   | Negative |
| P31231 | LSLANLGPRGEDGLDFPEYD   | Negative |
| P31231 | EDGLDFPEYDGEDRVIHISL   | Negative |
| P31231 | DGLDFPEYDGEDRVIHISLK   | Negative |
| P31231 | LCLSLANLGPRGEDGLDFPE   | Negative |
| P31231 | AALCLSLANLGPRGEDGLDF   | Negative |
| P31231 | LVLAALCLSLANLGPRGEDG   | Negative |
| P31231 | WLVLAALCLSLANLGPRGED   | Negative |
| P31231 | MKGPWLVLAAALCLSLANLGP  | Negative |
| P31231 | PEYDGEDRVIHISLKNYKAA   | Negative |
| P31231 | PWLVLAAALCLSLANLGPRGE  | Negative |
| P31231 | SLANLGPRGEDGLDFPEYDG   | Negative |
| P31231 | CLSLANLGPRGEDGLDFPEY   | Negative |
| P31231 | NLGPRGEDGLDFPEYDGEDR   | Negative |
| P31231 | RGEDGLDFPEYDGEDRVIHI   | Negative |
| P31231 | LANLGPRGEDGLDFPEYDGE   | Negative |
| P31231 | GLDFPEYDGEDRVIHISLKN   | Negative |
| P31231 | KGPWLVLAAALCLSLANLGPR  | Negative |
| P31231 | LDFPEYDGEDRVIHISLKNY   | Negative |
| P31231 | ALCLSLANLGPRGEDGLDFP   | Negative |
| P31231 | ANLGPRGEDGLDFPEYDGED   | Negative |
| P31231 | DFPEYDGEDRVIHISLKNYK   | Negative |
| P31231 | PRGEDGLDFPEYDGEDRVIH   | Negative |
| P31231 | VLAALCLSLANLGPRGEDGL   | Negative |
| P31235 | VVG VYLLSSCRAEEGLNFPT  | Negative |
| P31235 | NFPTYD GKDRV VSLSEKNFK | Negative |
| P31235 | SSCRAEEGLNFPTYD GKDRV  | Negative |
| P31235 | KRAHLFVVG VYLLSSCRAEE  | Negative |
| P31235 | CRAEEGLNFPTYD GKDRVVS  | Negative |
| P31235 | RAHLFVVG VYLLSSCRAEEG  | Negative |
| P31235 | GLNFPTYD GKDRV VSLSEKN | Negative |

|        |                       |          |
|--------|-----------------------|----------|
| P31235 | GVYLLSSCRAEEGLNFPTYD  | Negative |
| P31235 | PTYDGGKDRVVSLEKNFKQI  | Negative |
| P31235 | MKRAHLFVVG VYLLSSCRAE | Negative |
| P31235 | LLSSCRAEEGLNFPTYDGGK  | Negative |
| P31235 | SCRAEEGLNFPTYDGGKDRVV | Negative |
| P31235 | AEEGLNFPTYDGGKDRVVSLS | Negative |
| P31235 | FPTYDGGKDRVVSLEKNFKQ  | Negative |
| P31235 | YLLSSCRAEEGLNFPTYDGGK | Negative |
| P31235 | GKDRVVSLEKNFKQILKKY   | Negative |
| P31235 | EGLNFPTYDGGKDRVVSLEK  | Negative |
| P31235 | VGVYLLSSCRAEEGLNFPTY  | Negative |
| P31235 | FVVG VYLLSSCRAEEGLNFP | Negative |
| P31235 | DGKDRVVSLEKNFKQILKK   | Negative |
| P31235 | RAEEGLNFPTYDGGKDRVVS  | Negative |
| P31235 | AHLFVVG VYLLSSCRAEEGL | Negative |
| P31235 | YDGGKDRVVSLEKNFKQILK  | Negative |
| P31235 | LFVVG VYLLSSCRAEEGLNF | Negative |
| P31235 | LSSCRAEEGLNFPTYDGGKDR | Negative |
| P31235 | EEGLNFPTYDGGKDRVVSLE  | Negative |
| P31235 | TYDGGKDRVVSLEKNFKQIL  | Negative |
| P31235 | LNPTYDGGKDRVVSLEKNF   | Negative |
| P31235 | VYLLSSCRAEEGLNFPTYDG  | Negative |
| P31358 | RFLFLLLTISLLVMVQIQTG  | Negative |
| P31358 | VQIQTGLSGQNDTSQTSSPS  | Negative |
| P31358 | TSQTSSPSASSNISGGIFL   | Negative |
| P31358 | MKRFLFLLLTISLLVMVQIQ  | Negative |
| P31358 | FLLLTISLLVMVQIQTGLSG  | Negative |
| P31358 | KRFLFLLLTISLLVMVQIQ   | Negative |
| P31358 | QTGLSGQNDTSQTSSPSASS  | Negative |
| P31358 | TGLSGQNDTSQTSSPSASSN  | Negative |
| P31358 | IQTGLSGQNDTSQTSSPSAS  | Negative |
| P31358 | LLVMVQIQTGLSGQNDTSQT  | Negative |
| P31358 | LLLTISLLVMVQIQTGLSGQ  | Negative |
| P31358 | NDTSQTSSPSASSNISGGIF  | Negative |
| P31358 | LTISLLVMVQIQTGLSGQND  | Negative |
| P31358 | LSGQNDTSQTSSPSASSNIS  | Negative |
| P31358 | LLTISLLVMVQIQTGLSGQN  | Negative |
| P31358 | MVQIQTGLSGQNDTSQTSSP  | Negative |
| P31358 | QNDTSQTSSPSASSNISGGI  | Negative |
| P31358 | SLLVMVQIQTGLSGQNDTSQ  | Negative |
| P31358 | VMVQIQTGLSGQNDTSQTSS  | Negative |
| P31358 | LFLLLTISLLVMVQIQTGLS  | Negative |
| P31358 | GLSGQNDTSQTSSPSASSNI  | Negative |
| P31358 | SGQNDTSQTSSPSASSNISG  | Negative |
| P31358 | LVMVQIQTGLSGQNDTSQTS  | Negative |
| P31358 | DTSQTSSPSASSNISGGIFL  | Negative |

|        |                       |          |
|--------|-----------------------|----------|
| P31358 | SQTSSPSASSNISGGIFLFF  | Negative |
| P31358 | QIQTGLSGQNDTSQTSSPSA  | Negative |
| P31358 | ISLLVMVQIQTGLSGQNDTS  | Negative |
| P31358 | GQNDTSQTSSPSASSNISGG  | Negative |
| P31358 | FLFLLLTISLLVMVQIQTGL  | Negative |
| P31418 | VGLVGAVSADVQVMKDVTLG  | Negative |
| P31418 | DVTLGFGQALEQCREESQLT  | Negative |
| P31418 | QVMKDVTLGFGQALEQCREE  | Negative |
| P31418 | VQVMKDVTLGFGQALEQCRE  | Negative |
| P31418 | GLVGAVSADVQVMKDVTLG   | Negative |
| P31418 | VGAVSADVQVMKDVTLGFGQ  | Negative |
| P31418 | QDTRSLVLVVLVGLVGAVSA  | Negative |
| P31418 | DVQVMKDVTLGFGQALEQCR  | Negative |
| P31418 | TRSLVLVVLVGLVGAVSADV  | Negative |
| P31418 | VLVGLVGAVSADVQVMKDVT  | Negative |
| P31418 | SADVQVMKDVTLGFGQALEQ  | Negative |
| P31418 | LVGAVSADVQVMKDVTLGFG  | Negative |
| P31418 | RSLVLVVLVGLVGAVSADVQ  | Negative |
| P31418 | MGQDTRSLVLVVLVGLVGAV  | Negative |
| P31418 | DTRSLVLVVLVGLVGAVSAD  | Negative |
| P31418 | VLVVLVGLVGAVSADVQVMK  | Negative |
| P31418 | VTLGFGQALEQCREESQLTE  | Negative |
| P31418 | ADVQVMKDVTLGFGQALEQC  | Negative |
| P31418 | KDVTLGFGQALEQCREESQL  | Negative |
| P31418 | VVLVGLVGAVSADVQVMKDV  | Negative |
| P31418 | AVSADVQVMKDVTLGFGQAL  | Negative |
| P31418 | LVGLVGAVSADVQVMKDVTL  | Negative |
| P31418 | MKDVTLGFGQALEQCREESQ  | Negative |
| P31418 | SLVLVVLVGLVGAVSADVQV  | Negative |
| P31418 | VMKDVTLGFGQALEQCREES  | Negative |
| P31418 | GAVSADVQVMKDVTLGFGQA  | Negative |
| P31418 | GQDTRSLVLVVLVGLVGAVS  | Negative |
| P31418 | VSADVQVMKDVTLGFGQALE  | Negative |
| P31418 | LVVLVGLVGAVSADVQVMKD  | Negative |
| P31419 | VVVFITDSVMGTAEVMSHVT  | Negative |
| P31419 | LILMVVVVFITDSVMGTAEV  | Negative |
| P31419 | TAHFGKALEECREESGLPVE  | Negative |
| P31419 | TAEVMSHVTAHFGKALEECR  | Negative |
| P31419 | NRLILMVVVVFITDSVMGTA  | Negative |
| P31419 | VVVVFITDSVMGTAEVMSHV  | Negative |
| P31419 | DSVMGTAEVMSHVTAHFGKA  | Negative |
| P31419 | VMSHVTAHFGKALEECREES  | Negative |
| P31419 | VTAHFGKALEECREESGLPV  | Negative |
| P31419 | VVFITDSVMGTAEVMSHVTA  | Negative |
| P31419 | MVVVVVFITDSVMGTAEVMSH | Negative |
| P31419 | ITDSVMGTAEVMSHVTAHFG  | Negative |

|        |                      |          |
|--------|----------------------|----------|
| P31419 | AHFGKALEECREESGLPVEV | Negative |
| P31419 | MGTAEVMSHVTAHFGKALEE | Negative |
| P31419 | GTAEVMSHVTAHFGKALEEC | Negative |
| P31419 | MVNRLILMVVVVFITDSVMG | Negative |
| P31419 | LMVVVVFITDSVMGTAEVMS | Negative |
| P31419 | SVMGTAEVMSHVTAHFGKAL | Negative |
| P31419 | HVTAHFGKALEECREESGLP | Negative |
| P31419 | EVMSHVTAHFGKALEECREE | Negative |
| P31419 | MSHVTAHFGKALEECREESG | Negative |
| P31419 | RLILMVVVVFITDSVMGTAE | Negative |
| P31419 | AEVMSHVTAHFGKALEECRE | Negative |
| P31419 | VFITDSVMGTAEVMSHVTAH | Negative |
| P31419 | FITDSVMGTAEVMSHVTAHF | Negative |
| P31419 | VNRLILMVVVVFITDSVMGT | Negative |
| P31419 | VMGTAEVMSHVTAHFGKALE | Negative |
| P31419 | TDSVMGTAEVMSHVTAHFGK | Negative |
| P31419 | SHVTAHFGKALEECREESGL | Negative |
| P31420 | CVVVNGKNYGKEVLKDNIHQ | Negative |
| P31420 | VVNGKNYGKEVLKDNIHQAY | Negative |
| P31420 | MMALKDCVVVNGKNYGKEVL | Negative |
| P31420 | YGKEVLKDNIHQAYQLSFD  | Negative |
| P31420 | NGKNYGKEVLKDNIHQAYQL | Negative |
| P31420 | HVNQMMALKDCVVVNGKNYG | Negative |
| P31420 | NQMMALKDCVVVNGKNYGKE | Negative |
| P31420 | MALKDCVVVNGKNYGKEVLK | Negative |
| P31420 | LHVNQMMALKDCVVVNGKNY | Negative |
| P31420 | VVVNGKNYGKEVLKDNIHQ  | Negative |
| P31420 | KNYGKEVLKDNIHQAYQLSF | Negative |
| P31420 | ICALHVNQMMALKDCVVVNG | Negative |
| P31420 | GKNYGKEVLKDNIHQAYQLS | Negative |
| P31420 | KDCVVVNGKNYGKEVLKDNI | Negative |
| P31420 | KLLILTICALHVNQMMALKD | Negative |
| P31420 | QMMALKDCVVVNGKNYGKEV | Negative |
| P31420 | DCVVVNGKNYGKEVLKDNIH | Negative |
| P31420 | ALKDCVVVNGKNYGKEVLKD | Negative |
| P31420 | LKDCVVVNGKNYGKEVLKDN | Negative |
| P31420 | MKLLILTICALHVNQMMALK | Negative |
| P31420 | TICALHVNQMMALKDCVVVN | Negative |
| P31420 | ALHVNQMMALKDCVVVNGKN | Negative |
| P31420 | NYGKEVLKDNIHQAYQLSFD | Negative |
| P31420 | CALHVNQMMALKDCVVVNGK | Negative |
| P31420 | LLILTICALHVNQMMALKDC | Negative |
| P31420 | VNGKNYGKEVLKDNIHQAYQ | Negative |
| P31420 | LTICALHVNQMMALKDCVVV | Negative |
| P31420 | VNQMMALKDCVVVNGKNYGK | Negative |
| P31420 | ILTICALHVNQMMALKDCVV | Negative |

|        |                      |          |
|--------|----------------------|----------|
| P31429 | AVCTADSFLDQAVQILRVTP | Negative |
| P31429 | DQAVQILRVTPVIDGHNDLP | Negative |
| P31429 | RVTPVIDGHNDLPWQLLNKF | Negative |
| P31429 | ILRVTPVIDGHNDLPWQLLN | Negative |
| P31429 | TPVIDGHNDLPWQLLNKFNN | Negative |
| P31429 | LWPLVAVCTADSFLDQAVQI | Negative |
| P31429 | LDQAVQILRVTPVIDGHNDL | Negative |
| P31429 | LRVTPVIDGHNDLPWQLLNK | Negative |
| P31429 | WPLVAVCTADSFLDQAVQIL | Negative |
| P31429 | VAVCTADSFLDQAVQILRV  | Negative |
| P31429 | SWWLWPLVAVCTADSFLDQA | Negative |
| P31429 | QAVQILRVTPVIDGHNDLPW | Negative |
| P31429 | VCTADSFLDQAVQILRVTPV | Negative |
| P31429 | PLVAVCTADSFLDQAVQILR | Negative |
| P31429 | QILRVTPVIDGHNDLPWQLL | Negative |
| P31429 | WLWPLVAVCTADSFLDQAVQ | Negative |
| P31429 | DSFLDQAVQILRVTPVIDGH | Negative |
| P31429 | VQILRVTPVIDGHNDLPWQL | Negative |
| P31429 | CTADSFLDQAVQILRVTPVI | Negative |
| P31429 | LVAVCTADSFLDQAVQILRV | Negative |
| P31429 | FLDQAVQILRVTPVIDGHND | Negative |
| P31429 | AVQILRVTPVIDGHNDLPWQ | Negative |
| P31429 | SFLDQAVQILRVTPVIDGHN | Negative |
| P31429 | WWLWPLVAVCTADSFLDQAV | Negative |
| P31429 | VTPVIDGHNDLPWQLLNKFN | Negative |
| P31429 | TADSFLDQAVQILRVTPVID | Negative |
| P31429 | ADSFLDQAVQILRVTPVIDG | Negative |
| P31429 | TSWWLWPLVAVCTADSFLDQ | Negative |
| P31429 | MWTSWWLWPLVAVCTADSFL | Negative |
| P31515 | IFLLTVSLCHFMEYRAVQAG | Negative |
| P31515 | RAVQAGNCWLQQSKNGRCQV | Negative |
| P31515 | LNERIQPGMIFLLTVSLCHF | Negative |
| P31515 | GMIFLLTVSLCHFMEYRAVQ | Negative |
| P31515 | YRAVQAGNCWLQQSKNGRCQ | Negative |
| P31515 | ERIQPGMIFLLTVSLCHFME | Negative |
| P31515 | FLLTVSLCHFMEYRAVQAGN | Negative |
| P31515 | SLCHFMEYRAVQAGNCWLQQ | Negative |
| P31515 | LLTVSLCHFMEYRAVQAGNC | Negative |
| P31515 | LCHFMEYRAVQAGNCWLQQS | Negative |
| P31515 | FMEYRAVQAGNCWLQQSKNG | Negative |
| P31515 | QPGMIFLLTVSLCHFMEYRA | Negative |
| P31515 | LTVSLCHFMEYRAVQAGNCW | Negative |
| P31515 | IQPGMIFLLTVSLCHFMEYR | Negative |
| P31515 | PGMIFLLTVSLCHFMEYRAV | Negative |
| P31515 | MEYRAVQAGNCWLQQSKNGR | Negative |
| P31515 | MLNERIQPGMIFLLTVSLCH | Negative |



|        |                       |          |
|--------|-----------------------|----------|
| P31515 | VQAGNCWLQQSKNGRCQVLY  | Negative |
| P31515 | CHFMEYRAVQAGNCWLQQSK  | Negative |
| P31515 | QAGNCWLQQSKNGRCQVLYR  | Negative |
| P31515 | AVQAGNCWLQQSKNGRCQVL  | Negative |
| P31515 | RIQPGMIFLLTVSLCHFMEY  | Negative |
| P31515 | AGNCWLQQSKNGRCQVLYRT  | Negative |
| P31515 | GNCWLQQSKNGRCQVLYRTE  | Negative |
| P31515 | MIFLLTVSLCHFMEYRAVQA  | Negative |
| P31515 | HFMEYRAVQAGNCWLQQSKN  | Negative |
| P31515 | EYRAVQAGNCWLQQSKNGRC  | Negative |
| P31515 | VSLCHFMEYRAVQAGNCWLQ  | Negative |
| P31515 | NERIQPGMIFLLTVSLCHFM  | Negative |
| P31532 | GVSGDGWYSFFREAVQGTWD  | Negative |
| P31532 | GDGWYSFFREAVQGTWDLWR  | Negative |
| P31532 | FLGVSGDGWYSFFREAVQGT  | Negative |
| P31532 | REAVQGTWDLWRAYRDNLEA  | Negative |
| P31532 | LATVIVLCSLFLGVSGDGWY  | Negative |
| P31532 | GWYSFFREAVQGTWDLWRAY  | Negative |
| P31532 | VLCSLFLGVSGDGWYSFFRE  | Negative |
| P31532 | LFLGVSGDGWYSFFREAVQG  | Negative |
| P31532 | SFFREAVQGTWDLWRAYRDN  | Negative |
| P31532 | SLFLGVSGDGWYSFFREAVQ  | Negative |
| P31532 | CSLFLGVSGDGWYSFFREAV  | Negative |
| P31532 | RLATVIVLCSLFLGVSGDGW  | Negative |
| P31532 | WYSFFREAVQGTWDLWRAYR  | Negative |
| P31532 | LGVSGDGWYSFFREAVQGTW  | Negative |
| P31532 | VIVLCSLFLGVSGDGWYSFF  | Negative |
| P31532 | FFREAVQGTWDLWRAYRDNL  | Negative |
| P31532 | IVLCSLFLGVSGDGWYSFFR  | Negative |
| P31532 | EAVQGTWDLWRAYRDNLEAN  | Negative |
| P31532 | SGDGWYSFFREAVQGTWDLW  | Negative |
| P31532 | VQGTWDLWRAYRDNLEANYQ  | Negative |
| P31532 | QGTWDLWRAYRDNLEANYQN  | Negative |
| P31532 | TVIVLCSLFLGVSGDGWYSF  | Negative |
| P31532 | DGWYSFFREAVQGTWDLWRA  | Negative |
| P31532 | YSFFREAVQGTWDLWRAYRD  | Negative |
| P31532 | FREAVQGTWDLWRAYRDNLE  | Negative |
| P31532 | VSGDGWYSFFREAVQGTWDL  | Negative |
| P31532 | AVQGTWDLWRAYRDNLEANY  | Negative |
| P31532 | LCSLFLGVSGDGWYSFFREA  | Negative |
| P31532 | MRLATVIVLCSLFLGVSGDG  | Negative |
| P31608 | LLISGVLLISLAVLCHGDPV  | Negative |
| P31608 | GVLLISLAVLCHGDPVVDSD  | Negative |
| P31608 | LLLISGVLLISLAVLCHGDP  | Negative |
| P31608 | VDSGDGDAVQLNLGGNYPLYT | Negative |
| P31608 | LISGVLLISLAVLCHGDPVV  | Negative |

|        |                        |          |
|--------|------------------------|----------|
| P31608 | VLLISLAVLCHGDPVVDSGD   | Negative |
| P31608 | HGDPVVDSGDGDAVQLNLGGN  | Negative |
| P31608 | GDPVVDSGDGDAVQLNLGGNY  | Negative |
| P31608 | VVDSGDGDAVQLNLGGNYPLY  | Negative |
| P31608 | ISLAVLCHGDPVVDSGDGDAV  | Negative |
| P31608 | ALLISGVLLISLAVLCHGD    | Negative |
| P31608 | DPVVDSGDGDAVQLNLGGNYP  | Negative |
| P31608 | AASNALLISGVLLISLAVL    | Negative |
| P31608 | AVLCHGDPVVDSGDGDAVQLN  | Negative |
| P31608 | NALLISGVLLISLAVLCHG    | Negative |
| P31608 | CHGDPVVDSGDGDAVQLNLGG  | Negative |
| P31608 | LLISLAVLCHGDPVVDSGDGD  | Negative |
| P31608 | LISLAVLCHGDPVVDSGDGA   | Negative |
| P31608 | VLCHGDPVVDSGDGDAVQLNL  | Negative |
| P31608 | SLAVLCHGDPVVDSGDGDAVQ  | Negative |
| P31608 | PVVDSGDGDAVQLNLGGNYPL  | Negative |
| P31608 | SNALLISGVLLISLAVLCH    | Negative |
| P31608 | LAVLCHGDPVVDSGDGDAVQL  | Negative |
| P31608 | LCHGDPVVDSGDGDAVQLNLG  | Negative |
| P31608 | DSDGDGDAVQLNLGGNYPLYTI | Negative |
| P31608 | SGVLLISLAVLCHGDPVVDS   | Negative |
| P31608 | ASNALLISGVLLISLAVLC    | Negative |
| P31608 | MAASNALLISGVLLISLAV    | Negative |
| P31608 | SDGDGDAVQLNLGGNYPLYTIQ | Negative |
| P31697 | LLAGILMFAMMMVAGRAEAG   | Negative |
| P31697 | VRKSQEITFCLLAGILMFMA   | Negative |
| P31697 | MFAMMMVAGRAEAGVALGAT   | Negative |
| P31697 | RKSQEITFCLLAGILMFAM    | Negative |
| P31697 | KSQEITFCLLAGILMFAMMM   | Negative |
| P31697 | EITFCLLAGILMFAMMMVAG   | Negative |
| P31697 | AGILMFAMMMVAGRAEAGVA   | Negative |
| P31697 | FCLLAGILMFAMMMVAGRAE   | Negative |
| P31697 | FMAMMMVAGRAEAGVALGATR  | Negative |
| P31697 | KNVNVVRKSQEITFCLLAGIL  | Negative |
| P31697 | TFCLLAGILMFAMMMVAGRA   | Negative |
| P31697 | LAGILMFAMMMVAGRAEAGV   | Negative |
| P31697 | MMVAGRAEAGVALGATRVIY   | Negative |
| P31697 | NKNVNVVRKSQEITFCLLAGI  | Negative |
| P31697 | VNVVRKSQEITFCLLAGILMF  | Negative |
| P31697 | ITFCLLAGILMFAMMMVAGR   | Negative |
| P31697 | MVAGRAEAGVALGATRVIYP   | Negative |
| P31697 | VAGRAEAGVALGATRVIYPA   | Negative |
| P31697 | CLLAGILMFAMMMVAGRAEA   | Negative |
| P31697 | NVRKSQEITFCLLAGILMF    | Negative |
| P31697 | QEITFCLLAGILMFAMMMVA   | Negative |
| P31697 | MAMMMVAGRAEAGVALGATRV  | Negative |

|        |                       |          |
|--------|-----------------------|----------|
| P31697 | MSNKNVNVVRKSQEITFCLLA | Negative |
| P31697 | SNKNVNVVRKSQEITFCLLAG | Negative |
| P31697 | NVNVVRKSQEITFCLLAGILM | Negative |
| P31697 | AMMVAGRAEAGVALGATRVI  | Negative |
| P31697 | SQEITFCLLAGILMFMMAMMV | Negative |
| P31697 | GILMFMMAMMVAGRAEAGVAL | Negative |
| P31697 | LMFMAMMVAGRAEAGVALGA  | Negative |
| P31715 | EGKITPVSVKKVDDKVTLTK  | Negative |
| P31715 | MALLLLSGTANAEGKITPVS  | Negative |
| P31715 | KMNKLVKSSVATSMALLLLS  | Negative |
| P31715 | LLLSGTANAEGKITPVSVK   | Negative |
| P31715 | LLSGTANAEGKITPVSVKK   | Negative |
| P31715 | NKLVKSSVATSMALLLLSGT  | Negative |
| P31715 | SMALLLLSGTANAEGKITPV  | Negative |
| P31715 | LVKSSVATSMALLLLSGTAN  | Negative |
| P31715 | MKMNKLVKSSVATSMALLLL  | Negative |
| P31715 | KSSVATSMALLLLSGTANAE  | Negative |
| P31715 | SSVATSMALLLLSGTANAEG  | Negative |
| P31715 | GTANAEGKITPVSVKVDDK   | Negative |
| P31715 | SVATSMALLLLSGTANAEGK  | Negative |
| P31715 | KITPVSVKVDDKVTLTKTT   | Negative |
| P31715 | VKSSVATSMALLLLSGTANA  | Negative |
| P31715 | NAEGKITPVSVKVDDKVTL   | Negative |
| P31715 | SGTANAEGKITPVSVKVDD   | Negative |
| P31715 | ALLLLSGTANAEGKITPVS   | Negative |
| P31715 | ITPVSVKVDDKVTLTKTTA   | Negative |
| P31715 | AEGKITPVSVKVDDKVTLTK  | Negative |
| P31715 | TANAEGKITPVSVKVDDKV   | Negative |
| P31715 | MNKLVKSSVATSMALLLLSG  | Negative |
| P31715 | GKITPVSVKVDDKVTLTKT   | Negative |
| P31715 | ANAEGKITPVSVKVDDKV    | Negative |
| P31715 | TSMALLLLSGTANAEGKITP  | Negative |
| P31715 | LLSGTANAEGKITPVSVKV   | Negative |
| P31715 | LSGTANAEGKITPVSVKVD   | Negative |
| P31715 | KLVKSSVATSMALLLLSGTA  | Negative |
| P31715 | ATSMALLLLSGTANAEGKIT  | Negative |
| P31716 | LLENAKAANDTEDIGKGS    | Negative |
| P31716 | KILATTLSVSLAPLANPL    | Negative |
| P31716 | LKNKILATTLSVSLAPLAN   | Negative |
| P31716 | NKILATTLSVSLAPLANPL   | Negative |
| P31716 | VSLAPLANPLLENAKAAND   | Negative |
| P31716 | LSVSLAPLANPLLENAKAA   | Negative |
| P31716 | KNKILATTLSVSLAPLANP   | Negative |
| P31716 | SLLAPLANPLLENAKAANDT  | Negative |
| P31716 | LAPLANPLLENAKAANDTED  | Negative |
| P31716 | ILATTLSVSLAPLANPLLE   | Negative |

|        |                        |          |
|--------|------------------------|----------|
| P31716 | NAKAANDTEDIGKGS DIEI   | Negative |
| P31716 | PLANPLENAKAANDTEDIG    | Negative |
| P31716 | LATTLVSLLAPLANPLEN     | Negative |
| P31716 | ANDTEDIGKGS DIEIIRTE   | Negative |
| P31716 | MLKNKILATTLVSLLAPLA    | Negative |
| P31716 | LENAKAANDTEDIGKGS DIE  | Negative |
| P31716 | TLSVSLLAPLANPLENAKA    | Negative |
| P31716 | ENAKAANDTEDIGKGS DIEI  | Negative |
| P31716 | AANDTEDIGKGS DIEIIRKT  | Negative |
| P31716 | AKAANDTEDIGKGS DIEIIRK | Negative |
| P31716 | PLENAKAANDTEDIGKGS D   | Negative |
| P31716 | KAANDTEDIGKGS DIEIIRK  | Negative |
| P31716 | LANPLENAKAANDTEDIGK    | Negative |
| P31716 | ATTLSVSLLAPLANPLENA    | Negative |
| P31716 | ANPLENAKAANDTEDIGKG    | Negative |
| P31716 | TTLVSLLAPLANPLENAK     | Negative |
| P31716 | SVSLLAPLANPLENAKAA     | Negative |
| P31716 | NPLENAKAANDTEDIGKGS    | Negative |
| P31716 | APLANPLENAKAANDTE DI   | Negative |
| P31720 | WTVAEDVCRAPNGKDG VAGI  | Negative |
| P31720 | DVCRAPNGKDG VAGIPGRPG  | Negative |
| P31720 | PNGKDG VAGIPGRPGRPGLK  | Negative |
| P31720 | VACVLAVTLVWTVAEDVCRA   | Negative |
| P31720 | VTLVWTVAEDVCRAPNGKDG   | Negative |
| P31720 | ACVLAVTLVWTVAEDVCRAP   | Negative |
| P31720 | TLVWTVAEDVCRAPNGKDG V  | Negative |
| P31720 | LVWTVAEDVCRAPNGKDG V A | Negative |
| P31720 | APNGKDG VAGIPGRPGRPGL  | Negative |
| P31720 | LAVTLVWTVAEDVCRAPNGK   | Negative |
| P31720 | CRAPNGKDG VAGIPGRPGRP  | Negative |
| P31720 | EDVCRAPNGKDG VAGIPGRP  | Negative |
| P31720 | VAEDVCRAPNGKDG VAGIPG  | Negative |
| P31720 | AEDVCRAPNGKDG VAGIPGR  | Negative |
| P31720 | CVLAVTLVWTVAEDVCRAPN   | Negative |
| P31720 | TVAEDVCRAPNGKDG VAGIP  | Negative |
| P31720 | VLAVTLVWTVAEDVCRAPNG   | Negative |
| P31720 | METSQGWLVACVLAVTLVWT   | Negative |
| P31720 | VWTVAEDVCRAPNGKDG VAG  | Negative |
| P31720 | WLVACVLAVTLVWTVAEDVC   | Negative |
| P31720 | VCRAPNGKDG VAGIPGRPGR  | Negative |
| P31720 | TSQGWLVACVLAVTLVWTVA   | Negative |
| P31720 | QGWLVACVLAVTLVWTVAED   | Negative |
| P31720 | SQGWLVACVLAVTLVWTVAE   | Negative |
| P31720 | GWLVAEVLAVTLVWTVAEDV   | Negative |
| P31720 | ETSQGWLVACVLAVTLVWTV   | Negative |
| P31720 | RAPNGKDG VAGIPGRPGRP   | Negative |

|        |                       |          |
|--------|-----------------------|----------|
| P31720 | NGKDG VAGIPGRPGRPGLKG | Negative |
| P31720 | AVTLVWTVAEDVCRAPNGKD  | Negative |
| P31722 | LLLLLALPLRSQANAGCYGI  | Negative |
| P31722 | AGCYGIPGMPGLPGTPGKDG  | Negative |
| P31722 | ANAGCYGIPGMPGLPGTPGK  | Negative |
| P31722 | VVGTSQCPQHGLYLLLLLLA  | Negative |
| P31722 | QPQHGLYLLLLLLALPLRSQ  | Negative |
| P31722 | PQHGLYLLLLLLALPLRSQA  | Negative |
| P31722 | MVVGTSQCPQHGLYLLLLLL  | Negative |
| P31722 | SQANAGCYGIPGMPGLPGTP  | Negative |
| P31722 | LLLALPLRSQANAGCYGIP   | Negative |
| P31722 | QHGLYLLLLLLALPLRSQAN  | Negative |
| P31722 | LRSQANAGCYGIPGMPGLPG  | Negative |
| P31722 | RSQANAGCYGIPGMPGLPGT  | Negative |
| P31722 | TSCQPQHGLYLLLLLLALPL  | Negative |
| P31722 | HGLYLLLLLLALPLRSQANA  | Negative |
| P31722 | SCQPQHGLYLLLLLLALPLR  | Negative |
| P31722 | NAGCYGIPGMPGLPGTPGKD  | Negative |
| P31722 | CQPQHGLYLLLLLLALPLRS  | Negative |
| P31722 | QANAGCYGIPGMPGLPGTPG  | Negative |
| P31722 | LYLLLLLLALPLRSQANAGC  | Negative |
| P31722 | VGTSCQPQHGLYLLLLLLAL  | Negative |
| P31722 | GLYLLLLLLALPLRSQANAG  | Negative |
| P31722 | LLALPLRSQANAGCYGIPGM  | Negative |
| P31722 | LLLALPLRSQANAGCYGIPG  | Negative |
| P31722 | GTSCQPQHGLYLLLLLLALP  | Negative |
| P31722 | LPLRSQANAGCYGIPGMPGL  | Negative |
| P31722 | ALPLRSQANAGCYGIPGMPG  | Negative |
| P31722 | LLLLLLALPLRSQANAGCYG  | Negative |
| P31722 | PLRSQANAGCYGIPGMPGLP  | Negative |
| P31722 | LALPLRSQANAGCYGIPGMP  | Negative |
| P31723 | LGSTIAHPYGETEAVLRSEP  | Negative |
| P31723 | PVSFPLTVLSLLGSTIAHPY  | Negative |
| P31723 | EAVLRSEPKSNQAKADAVKE  | Negative |
| P31723 | RLPVSFPLTVLSLLGSTIAH  | Negative |
| P31723 | SFPLTVLSLLGSTIAHPYGE  | Negative |
| P31723 | STIAHPYGETEAVLRSEPKS  | Negative |
| P31723 | VSFPLTVLSLLGSTIAHPYG  | Negative |
| P31723 | TVLSLLGSTIAHPYGETEAV  | Negative |
| P31723 | VLRSEPKSNQAKADAVKEAF  | Negative |
| P31723 | MRLPVSFPLTVLSLLGSTIA  | Negative |
| P31723 | GETEAVLRSEPKSNQAKADA  | Negative |
| P31723 | AVLRSEPKSNQAKADAVKEA  | Negative |
| P31723 | YGETEAVLRSEPKSNQAKAD  | Negative |
| P31723 | LTVLSLLGSTIAHPYGETEA  | Negative |
| P31723 | LRSEPKSNQAKADAVKEAFQ  | Negative |

|        |                       |          |
|--------|-----------------------|----------|
| P31723 | TEAVLRSEPКСNQAКADAVK  | Negative |
| P31723 | GSTIAHPYGETEAVLRSEPK  | Negative |
| P31723 | FPLTVLSLLGSTIAHPYGET  | Negative |
| P31723 | LLGSTIAHPYGETEAVLRSE  | Negative |
| P31723 | TIAHPYGETEAVLRSEPKSN  | Negative |
| P31723 | LSLLGSTIAHPYGETEAVLR  | Negative |
| P31723 | SLLGSTIAHPYGETEAVLRS  | Negative |
| P31723 | PYGETEAVLRSEPKSNQAKA  | Negative |
| P31723 | VLSLLGSTIAHPYGETEAVL  | Negative |
| P31723 | PLTVLSLLGSTIAHPYGETE  | Negative |
| P31723 | ETEAVLRSEPKSNQAКADAV  | Negative |
| P31723 | IAHPYGETEAVLRSEPKSNQ  | Negative |
| P31723 | AHPYGETEAVLRSEPKSNQA  | Negative |
| P31723 | LPVSFPLTVLSLLGSTIAHP  | Negative |
| P31746 | TILLSFIFFLLLSLPTVAEA  | Negative |
| P31746 | DFLKTILLSFIFFLLLSLPT  | Negative |
| P31746 | LPTVAEADVТNКСVNYSKDVІ | Negative |
| P31746 | SFIFFLLLSLPTVAEADVТN  | Negative |
| P31746 | PTVAEADVТNКСVNYSKDVІY | Negative |
| P31746 | ILLSFIFFLLLSLPTVAEAD  | Negative |
| P31746 | NDLNDFLKTILLSFIFFLLL  | Negative |
| P31746 | VAEADVТNКСVNYSKDVІYQІ | Negative |
| P31746 | DVTNКСVNYSKDVІYQІVTDR | Negative |
| P31746 | LLSLPTVAEADVТNКСVNYSK | Negative |
| P31746 | ADVТNКСVNYSKDVІYQІVTD | Negative |
| P31746 | FLKTILLSFIFFLLLSLPTV  | Negative |
| P31746 | MNDLNDFLKTILLSFIFFLL  | Negative |
| P31746 | IFFLLLSLPTVAEADVТNКСV | Negative |
| P31746 | KTILLSFIFFLLLSLPTVAE  | Negative |
| P31746 | FFLLLSLPTVAEADVТNКСVN | Negative |
| P31746 | LLSFIFFLLLSLPTVAEADV  | Negative |
| P31746 | TVAEADVТNКСVNYSKDVІYQ | Negative |
| P31746 | LSLPTVAEADVТNКСVNYSK  | Negative |
| P31746 | DLNDFLKTILLSFIFFLLLS  | Negative |
| P31746 | LSFIFFLLLSLPTVAEADVТ  | Negative |
| P31746 | LKTILLSFIFFLLLSLPTVA  | Negative |
| P31746 | LNDFLKTILLSFIFFLLLSL  | Negative |
| P31746 | EADVТNКСVNYSKDVІYQІVT | Negative |
| P31746 | NDFLKTILLSFIFFLLLSLP  | Negative |
| P31746 | FLLLSLPTVAEADVТNКСVN  | Negative |
| P31746 | AEADVТNКСVNYSKDVІYQІV | Negative |
| P31746 | LLLSLPTVAEADVТNКСVNYS | Negative |
| P31746 | SLPTVAEADVТNКСVNYSKDV | Negative |
| P31779 | FHRAQGTHGEADSKCPLMVK  | Negative |
| P31779 | FIFSGAFHRAQGTHGEADSK  | Negative |
| P31779 | SGAFHRAQGTHGEADSKCPL  | Negative |

|        |                       |          |
|--------|-----------------------|----------|
| P31779 | NTLALLTIFIFSGAFHRAQG  | Negative |
| P31779 | IFSGAFHRAQGTHGEADSKC  | Negative |
| P31779 | GTHGEADSKCPLMVKVLDVAV | Negative |
| P31779 | IFIFSGAFHRAQGTHGEADS  | Negative |
| P31779 | LALLTIFIFSGAFHRAQGTH  | Negative |
| P31779 | GEADSKCPLMVKVLDVAVRGI | Negative |
| P31779 | YNTLALLTIFIFSGAFHRAQ  | Negative |
| P31779 | DSKCPLMVKVLDVAVRGIPAA | Negative |
| P31779 | GAFHRAQGTHGEADSKCPLM  | Negative |
| P31779 | TLALLTIFIFSGAFHRAQGT  | Negative |
| P31779 | RAQGTHGEADSKCPLMVKVL  | Negative |
| P31779 | HRAQGTHGEADSKCPLMVKV  | Negative |
| P31779 | AFHRAQGTHGEADSKCPLMV  | Negative |
| P31779 | TIFIFSGAFHRAQGTHGEAD  | Negative |
| P31779 | AQGTHGEADSKCPLMVKVLD  | Negative |
| P31779 | ADSKCPLMVKVLDVAVRGIPA | Negative |
| P31779 | LLTIFIFSGAFHRAQGTHGE  | Negative |
| P31779 | AYYNTLALLTIFIFSGAFHR  | Negative |
| P31779 | ALLTIFIFSGAFHRAQGTHG  | Negative |
| P31779 | HGEADSKCPLMVKVLDVAVRG | Negative |
| P31779 | FSGAFHRAQGTHGEADSKCP  | Negative |
| P31779 | YYNTLALLTIFIFSGAFHRA  | Negative |
| P31779 | THGEADSKCPLMVKVLDVAVR | Negative |
| P31779 | QGTHGEADSKCPLMVKVLDV  | Negative |
| P31779 | MAYYNTLALLTIFIFSGAFH  | Negative |
| P31779 | EADSKCPLMVKVLDVAVRGIP | Negative |
| P31797 | FSAIFIVSDTQKVTVEAAGN  | Negative |
| P31797 | VTVEAAGNLNKNVNFTSDVVY | Negative |
| P31797 | VEAAGNLNKNVNFTSDVVYQI | Negative |
| P31797 | VFSAIFIVSDTQKVTVEAAG  | Negative |
| P31797 | RWLSLVLSMSFVFSIAFIVS  | Negative |
| P31797 | MSFVFSIAFIVSDTQKVTVE  | Negative |
| P31797 | VLSMSFVFSIAFIVSDTQKV  | Negative |
| P31797 | DTQKVTVEAAGNLNKNVNFTS | Negative |
| P31797 | VSDTQKVTVEAAGNLNKNVNF | Negative |
| P31797 | TQKVTVEAAGNLNKNVNFTSD | Negative |
| P31797 | SFVFSIAFIVSDTQKVTVEA  | Negative |
| P31797 | KVTVEAAGNLNKNVNFTSDVV | Negative |
| P31797 | MRRWLSLVLSMSFVFSIAFI  | Negative |
| P31797 | SMSFVFSIAFIVSDTQKVTV  | Negative |
| P31797 | SDTQKVTVEAAGNLNKNVNFT | Negative |
| P31797 | FVFSIAFIVSDTQKVTVEAA  | Negative |
| P31797 | QKVTVEAAGNLNKNVNFTSDV | Negative |
| P31797 | WLSLVLSMSFVFSIAFIVSD  | Negative |
| P31797 | FIVSDTQKVTVEAAGNLNKV  | Negative |
| P31797 | SAIFIVSDTQKVTVEAAGNL  | Negative |

|        |                      |          |
|--------|----------------------|----------|
| P31797 | IFIVSDTQKVTVEAAGNLNK | Negative |
| P31797 | IVSDTQKVTVEAAGNLNKVN | Negative |
| P31797 | LVLSMSFVFSAIFIVSDTQK | Negative |
| P31797 | LSMSFVFSAIFIVSDTQKVT | Negative |
| P31797 | EAAGNLNKVNFTSDVVYQIV | Negative |
| P31797 | SLVLSMSFVFSAIFIVSDTQ | Negative |
| P31797 | LSLVLSMSFVFSAIFIVSDT | Negative |
| P31797 | TVEAAGNLNKVNFTSDVVYQ | Negative |
| P31797 | RRWLSLVLSMSFVFSAIFIV | Negative |
| P31835 | IALGAALPVWASPDTSVNNK | Negative |
| P31835 | VWASPDTSVNNKLNFTSDTV | Negative |
| P31835 | PDTSVNNKLNFTSDTVYQIV | Negative |
| P31835 | VSMSVGIALGAALPVWASPD | Negative |
| P31835 | ALGAALPVWASPDTSVNNKL | Negative |
| P31835 | VKWLTSVMSVGIALGAALP  | Negative |
| P31835 | KKQVKWLTSVMSVGIALGA  | Negative |
| P31835 | PVWASPDTSVNNKLNFTSDT | Negative |
| P31835 | GAALPVWASPDTSVNNKLN  | Negative |
| P31835 | VGIALGAALPVWASPDTSVN | Negative |
| P31835 | ALPVWASPDTSVNNKLNFT  | Negative |
| P31835 | GIALGAALPVWASPDTSVNN | Negative |
| P31835 | DTSVNNKLNFTSDTVYQIVT | Negative |
| P31835 | KQVKWLTSVMSVGIALGAA  | Negative |
| P31835 | LGAALPVWASPDTSVNNKLN | Negative |
| P31835 | LTSVMSVGIALGAALPVWA  | Negative |
| P31835 | WASPDTSVNNKLNFTSDTVY | Negative |
| P31835 | SVGIALGAALPVWASPDTSV | Negative |
| P31835 | QVKWLTSVMSVGIALGAAL  | Negative |
| P31835 | ASPDTSVNNKLNFTSDTVYQ | Negative |
| P31835 | SPDTSVNNKLNFTSDTVYQI | Negative |
| P31835 | TSVMSVGIALGAALPVWAS  | Negative |
| P31835 | WLTSVMSVGIALGAALPVW  | Negative |
| P31835 | LPVWASPDTSVNNKLNFTSD | Negative |
| P31835 | AALPVWASPDTSVNNKLNFS | Negative |
| P31835 | MKKQVKWLTSVMSVGIALG  | Negative |
| P31835 | KWLTSVMSVGIALGAALPV  | Negative |
| P31835 | SVMSVGIALGAALPVWASP  | Negative |
| P31835 | SMSVGIALGAALPVWASPD  | Negative |
| P31854 | WIVAVWLMGVGNLFQFGNM  | Negative |
| P31854 | WLMGVGNLFQFGNMINHNV  | Negative |
| P31854 | NLFQFGNMINHNVGKHAVWS | Negative |
| P31854 | NHNVGKHAVWSYLSYGCYCG | Negative |
| P31854 | VGKHAVWSYLSYGCYCGWGG | Negative |
| P31854 | MGVEGNLFQFGNMINHNVGK | Negative |
| P31854 | FGNMINHNVGKHAVWSYLSY | Negative |
| P31854 | VEGNLFQFGNMINHNVGKHA | Negative |



|        |                      |          |
|--------|----------------------|----------|
| P31854 | LWIVAVWLMGVEGNLFQFGN | Negative |
| P31854 | GKHAVWSYLSYGCYCGWGGQ | Negative |
| P31854 | GNLFQFGNMINHMGKHAVW  | Negative |
| P31854 | VWLMGVEGNLFQFGNMINHM | Negative |
| P31854 | VAVWLMGVEGNLFQFGNMIN | Negative |
| P31854 | QFGNMINHMGKHAVWSYLS  | Negative |
| P31854 | MRTLWIVAVWLMGVEGNLFQ | Negative |
| P31854 | AVWLMGVEGNLFQFGNMINH | Negative |
| P31854 | HMGKHAVWSYLSYGCYCGW  | Negative |
| P31854 | GVEGNLFQFGNMINHMGKH  | Negative |
| P31854 | MINHMGKHAVWSYLSYGCY  | Negative |
| P31854 | MVGKHAVWSYLSYGCYCGWG | Negative |
| P31854 | LMGVEGNLFQFGNMINHMG  | Negative |
| P31854 | GNMINHMGKHAVWSYLSYG  | Negative |
| P31854 | NMINHMGKHAVWSYLSYGC  | Negative |
| P31854 | IVAVWLMGVEGNLFQFGNMI | Negative |
| P31854 | INHMGKHAVWSYLSYGCYC  | Negative |
| P31854 | EGNLFQFGNMINHMGKHAV  | Negative |
| P31854 | FQFGNMINHMGKHAVWSYL  | Negative |
| P31854 | LFQFGNMINHMGKHAVWSY  | Negative |
| P31854 | TLWIVAVWLMGVEGNLFQFG | Negative |
| P31956 | LVFAGEDKNEGVKVVRDNFG | Negative |
| P31956 | PQNLVFAGEDKNEGVKVVRD | Negative |
| P31956 | LISVILFVFIFPQNLVFAG  | Negative |
| P31956 | VFAGEDKNEGVKVVRDNFGV | Negative |
| P31956 | QNLVFAGEDKNEGVKVVRDN | Negative |
| P31956 | NEGVKVVRDNFGVPHLYAKN | Negative |
| P31956 | NLVFAGEDKNEGVKVVRDNF | Negative |
| P31956 | KNEGVKVVRDNFGVPHLYAK | Negative |
| P31956 | VILFVFIFPQNLVFAGEDK  | Negative |
| P31956 | SVILFVFIFPQNLVFAGED  | Negative |
| P31956 | ISVILFVFIFPQNLVFAGE  | Negative |
| P31956 | ILFVFIFPQNLVFAGEDKNE | Negative |
| P31956 | WLISVILFVFIFPQNLVFA  | Negative |
| P31956 | MKWLISVILFVFIFPQNLV  | Negative |
| P31956 | KMKWLISVILFVFIFPQNL  | Negative |
| P31956 | FIFPQNLVFAGEDKNEGVKV | Negative |
| P31956 | IILFVFIFPQNLVFAGEDKN | Negative |
| P31956 | MKMKWLISVILFVFIFPQN  | Negative |
| P31956 | FPQNLVFAGEDKNEGVKVVR | Negative |
| P31956 | EGVKVVRDNFGVPHLYAKNK | Negative |
| P31956 | EDKNEGVKVVRDNFGVPHLY | Negative |
| P31956 | FAGEDKNEGVKVVRDNFGVP | Negative |
| P31956 | IFPQNLVFAGEDKNEGVKVV | Negative |
| P31956 | KWLISVILFVFIFPQNLVF  | Negative |
| P31956 | VFIFPQNLVFAGEDKNEGVK | Negative |

|        |                       |          |
|--------|-----------------------|----------|
| P31956 | DKNEGVKVVVRDNFGVPHLYA | Negative |
| P31956 | AGEDKNEGVKVVVRDNFGVPH | Negative |
| P31956 | GEDKNEGVKVVVRDNFGVPHL | Negative |
| P31956 | FVFIFPQNLVFAGEDKNEGV  | Negative |
| P32478 | LVASALAATTLAAYAPSEPW  | Negative |
| P32478 | LAATTLAAYAPSEPWSTLTP  | Negative |
| P32478 | SEPWSTLTPTATYSGGVTDY  | Negative |
| P32478 | TTLAAYAPSEPWSTLTPTAT  | Negative |
| P32478 | YKKTLVASALAATTLAAYAP  | Negative |
| P32478 | APSEPWSTLTPTATYSGGV   | Negative |
| P32478 | ALAATTLAAYAPSEPWSTLT  | Negative |
| P32478 | ASALAATTLAAYAPSEPWST  | Negative |
| P32478 | AAAYAPSEPWSTLTPTATYSG | Negative |
| P32478 | PSEPWSTLTPTATYSGGVTD  | Negative |
| P32478 | TLAAYAPSEPWSTLTPTATY  | Negative |
| P32478 | YAPSEPWSTLTPTATYSGGV  | Negative |
| P32478 | MQYKKTLVASALAATTLAAY  | Negative |
| P32478 | PWSTLTPTATYSGGVTDYAS  | Negative |
| P32478 | QYKKTLVASALAATTLAAYA  | Negative |
| P32478 | TLTPTATYSGGVTDYASTFG  | Negative |
| P32478 | SALAATTLAAYAPSEPWSTL  | Negative |
| P32478 | LAAYAPSEPWSTLTPTATYS  | Negative |
| P32478 | EPWSTLTPTATYSGGVTDYA  | Negative |
| P32478 | AYAPSEPWSTLTPTATYSGG  | Negative |
| P32478 | STLTPTATYSGGVTDYASTF  | Negative |
| P32478 | ATTLAAYAPSEPWSTLTPTA  | Negative |
| P32478 | VASALAATTLAAYAPSEPWS  | Negative |
| P32478 | TLVASALAATTLAAYAPSEP  | Negative |
| P32478 | LTPTATYSGGVTDYASTFGI  | Negative |
| P32478 | TPTATYSGGVTDYASTFGIA  | Negative |
| P32478 | KTLVASALAATTLAAYAPSE  | Negative |
| P32478 | WSTLTPTATYSGGVTDYAST  | Negative |
| P32478 | AATTLAAYAPSEPWSTLTPT  | Negative |
| P32520 | FIAASAYGLTNSTLIDFALT  | Negative |
| P32520 | LIDFALTGNADNLQAGEGDT  | Negative |
| P32520 | TSIFIAASAYGLTNSTLIDF  | Negative |
| P32520 | LTGNADNLQAGEGDTNEVVP  | Negative |
| P32520 | LFVVLTSIFIAASAYGLTNS  | Negative |
| P32520 | ASAYGLTNSTLIDFALTGNA  | Negative |
| P32520 | NSTLIDFALTGNADNLQAGE  | Negative |
| P32520 | STLIDFALTGNADNLQAGEG  | Negative |
| P32520 | SIFIAASAYGLTNSTLIDFA  | Negative |
| P32520 | YGLTNSTLIDFALTGNADNL  | Negative |
| P32520 | AYGLTNSTLIDFALTGNADN  | Negative |
| P32520 | LTNSTLIDFALTGNADNLQA  | Negative |
| P32520 | TNSTLIDFALTGNADNLQAG  | Negative |

|        |                      |          |
|--------|----------------------|----------|
| P32520 | SAYGLTNSTLIDFALTGNAD | Negative |
| P32520 | VVLTSIFIAASAYGLTNSTL | Negative |
| P32520 | IFIAASAYGLTNSTLIDFAL | Negative |
| P32520 | MKKLFVVLTSIFIAASAYGL | Negative |
| P32520 | KLFVVLTSIFIAASAYGLTN | Negative |
| P32520 | VLTSIFIAASAYGLTNSTLI | Negative |
| P32520 | ALTGNADNLQAGEGDTNEVV | Negative |
| P32520 | GLTNSTLIDFALTGNADNLQ | Negative |
| P32520 | TLIDFALTGNADNLQAGEGD | Negative |
| P32520 | KKLFVVLTSIFIAASAYGLT | Negative |
| P32520 | FALTGNADNLQAGEGDTNEV | Negative |
| P32520 | DFALTGNADNLQAGEGDTNE | Negative |
| P32520 | IDFALTGNADNLQAGEGDTN | Negative |
| P32520 | LTSIFIAASAYGLTNSTLID | Negative |
| P32520 | IAASAYGLTNSTLIDFALTG | Negative |
| P32520 | AASAYGLTNSTLIDFALTGN | Negative |
| P32722 | AVADAFVSDQAEAKGFIEDS | Negative |
| P32722 | VADAFVSDQAEAKGFIEDSS | Negative |
| P32722 | VSAGSTQFAVADAFVSDQAE | Negative |
| P32722 | STQFAVADAFVSDQAEAKGF | Negative |
| P32722 | MKWSAIALAVSAGSTQFAVA | Negative |
| P32722 | FAVADAFVSDQAEAKGFIED | Negative |
| P32722 | AIALAVSAGSTQFAVADAFV | Negative |
| P32722 | LAVSAGSTQFAVADAFVSDQ | Negative |
| P32722 | KWSAIALAVSAGSTQFAVAD | Negative |
| P32722 | TQFAVADAFVSDQAEAKGFI | Negative |
| P32722 | SAGSTQFAVADAFVSDQAEA | Negative |
| P32722 | SAIALAVSAGSTQFAVADAF | Negative |
| P32722 | SDQAEAKGFIEDSSLDLLR  | Negative |
| P32722 | AFVSDQAEAKGFIEDSSLDL | Negative |
| P32722 | GSTQFAVADAFVSDQAEAKG | Negative |
| P32722 | FVSDQAEAKGFIEDSSLDLL | Negative |
| P32722 | WSAIALAVSAGSTQFAVADA | Negative |
| P32722 | AVSAGSTQFAVADAFVSDQA | Negative |
| P32722 | ALAVSAGSTQFAVADAFVSD | Negative |
| P32722 | AGSTQFAVADAFVSDQAEAK | Negative |
| P32722 | VMKWSAIALAVSAGSTQFAV | Negative |
| P32722 | MKVMKWSAIALAVSAGSTQF | Negative |
| P32722 | DQAEAKGFIEDSSLDLLLRN | Negative |
| P32722 | DAFVSDQAEAKGFIEDSSLD | Negative |
| P32722 | QAEAKGFIEDSSLDLLRNY  | Negative |
| P32722 | KVMKWSAIALAVSAGSTQFA | Negative |
| P32722 | ADAFVSDQAEAKGFIEDSSL | Negative |
| P32722 | VSDQAEAKGFIEDSSLDLLL | Negative |
| P32722 | QFAVADAFVSDQAEAKGFIE | Negative |
| P32823 | AAPSTPTLDWQPQQYSFVEV | Negative |

|        |                      |          |
|--------|----------------------|----------|
| P32823 | TLDWQPQQYSFVEVNVDGLG | Negative |
| P32823 | SYIGFALLSGGALAAPSTPT | Negative |
| P32823 | PSTPTLDWQPQQYSFVEVNV | Negative |
| P32823 | MKLNKITSYIGFALLSGGAL | Negative |
| P32823 | NKITSYIGFALLSGGALAAP | Negative |
| P32823 | KLNKITSYIGFALLSGGALA | Negative |
| P32823 | PTLDWQPQQYSFVEVNVDGL | Negative |
| P32823 | IGFALLSGGALAAPSTPTLD | Negative |
| P32823 | GFALLSGGALAAPSTPTLDW | Negative |
| P32823 | GALAAPSTPTLDWQPQQYSF | Negative |
| P32823 | LNKITSYIGFALLSGGALAA | Negative |
| P32823 | FALLSGGALAAPSTPTLDWQ | Negative |
| P32823 | DWQPQQYSFVEVNVDGLGSY | Negative |
| P32823 | LAAPSTPTLDWQPQQYSFVE | Negative |
| P32823 | LLSGGALAAPSTPTLDWQPQ | Negative |
| P32823 | ITSYIGFALLSGGALAAPST | Negative |
| P32823 | YIGFALLSGGALAAPSTPTL | Negative |
| P32823 | ALAAPSTPTLDWQPQQYSFV | Negative |
| P32823 | APSTPTLDWQPQQYSFVEVN | Negative |
| P32823 | ALLSGGALAAPSTPTLDWQP | Negative |
| P32823 | LDWQPQQYSFVEVNVDGLGS | Negative |
| P32823 | TPTLDWQPQQYSFVEVNVDG | Negative |
| P32823 | GGALAAPSTPTLDWQPQQYS | Negative |
| P32823 | WQPQQYSFVEVNVDGLGSYK | Negative |
| P32823 | STPTLDWQPQQYSFVEVNVD | Negative |
| P32823 | LSGGALAAPSTPTLDWQPQQ | Negative |
| P32823 | SGGALAAPSTPTLDWQPQQY | Negative |
| P32823 | KITSYIGFALLSGGALAAPS | Negative |
| P32881 | VVLSYKSFSSLGCDLPQTHS | Negative |
| P32881 | KSFSSLGCDLPQTHSLGNRR | Negative |
| P32881 | FYLLVALVVLSYKSFSSLGC | Negative |
| P32881 | SLGCDLPQTHSLGNRRALIL | Negative |
| P32881 | YLLVALVVLSYKSFSSLGCD | Negative |
| P32881 | PQTHSLGNRRALILLAQMRR | Negative |
| P32881 | YKSFSSLGCDLPQTHSLGNR | Negative |
| P32881 | CDLPQTHSLGNRRALILLAQ | Negative |
| P32881 | DLPQTHSLGNRRALILLAQM | Negative |
| P32881 | SSLGCDLPQTHSLGNRRALI | Negative |
| P32881 | LVALVVLSYKSFSSLGCDLP | Negative |
| P32881 | THSLGNRRALILLAQMRRIS | Negative |
| P32881 | LLVALVVLSYKSFSSLGCDL | Negative |
| P32881 | QTHSLGNRRALILLAQMRR  | Negative |
| P32881 | GCDLPQTHSLGNRRALILLA | Negative |
| P32881 | VLSYKSFSSLGCDLPQTHSL | Negative |
| P32881 | FSSLGCDLPQTHSLGNRRAL | Negative |
| P32881 | LGCDLPQTHSLGNRRALILL | Negative |

|        |                       |          |
|--------|-----------------------|----------|
| P32881 | LTFYLLVALVVLSYKSFSSL  | Negative |
| P32881 | HSLGNRRALILLAQMRRISP  | Negative |
| P32881 | ALTFYLLVALVVLSYKSFSS  | Negative |
| P32881 | LSYKSFSSLGCDLPQTHSLG  | Negative |
| P32881 | LVVLSYKSFSSLGCDLPQTH  | Negative |
| P32881 | LPQTHSLGNRRALILLAQMR  | Negative |
| P32881 | SYKSFSSLGCDLPQTHSLGN  | Negative |
| P32881 | TFYLLVALVVLSYKSFSSLG  | Negative |
| P32881 | SFSSLGCDLPQTHSLGNRRA  | Negative |
| P32881 | ALVVLSYKSFSSLGCDLPQT  | Negative |
| P32881 | MALTFYLLVALVVLSYKSFS  | Negative |
| P32890 | SLYAHGAPQTITELCSEYRN  | Negative |
| P32890 | LLSSLYAHGAPQTITELCSE  | Negative |
| P32890 | VKCYVLFTALLSSLYAHGAP  | Negative |
| P32890 | YAHGAPQTITELCSEYRNTQ  | Negative |
| P32890 | LYAHGAPQTITELCSEYRNT  | Negative |
| P32890 | KVKCYVLFTALLSSLYAHGA  | Negative |
| P32890 | CSEYRNTQIYTINDKILSYT  | Negative |
| P32890 | TALLSSLYAHGAPQTITELC  | Negative |
| P32890 | AHGAPQTITELCSEYRNTQI  | Negative |
| P32890 | ITELCSEYRNTQIYTINDKI  | Negative |
| P32890 | VLFTALLSSLYAHGAPQTIT  | Negative |
| P32890 | PQTITELCSEYRNTQIYTIN  | Negative |
| P32890 | NKVKCYVLFTALLSSLYAHG  | Negative |
| P32890 | APQTITELCSEYRNTQIYTI  | Negative |
| P32890 | GAPQTITELCSEYRNTQIYT  | Negative |
| P32890 | HGAPQTITELCSEYRNTQIY  | Negative |
| P32890 | TITELCSEYRNTQIYTINDK  | Negative |
| P32890 | FTALLSSLYAHGAPQTITEL  | Negative |
| P32890 | LCSEYRNTQIYTINDKILSY  | Negative |
| P32890 | TELCSEYRNTQIYTINDKIL  | Negative |
| P32890 | CYVLFTALLSSLYAHGAPQT  | Negative |
| P32890 | LSSLYAHGAPQTITELCSEY  | Negative |
| P32890 | ELCSEYRNTQIYTINDKILS  | Negative |
| P32890 | SSLYAHGAPQTITELCSEYR  | Negative |
| P32890 | QTITELCSEYRNTQIYTIND  | Negative |
| P32890 | MNKVKCYVLFTALLSSLYAH  | Negative |
| P32890 | ALLSSLYAHGAPQTITELCS  | Negative |
| P32890 | KCYVLFTALLSSLYAHGAPQ  | Negative |
| P32890 | LFTALLSSLYAHGAPQTITE  | Negative |
| P32936 | LVSIFAAVA AVGSEDCTPWT | Negative |
| P32936 | AAVLVSIFAAVA AVGSEDCT | Negative |
| P32936 | KSSCDLLLA AVLVSIFAAVA | Negative |
| P32936 | SSCDLLLA AVLVSIFAAVA  | Negative |
| P32936 | SEDCTPWTATPITPLPSCR   | Negative |
| P32936 | VSIFAAVA AVGSEDCTPWT  | Negative |

|        |                         |          |
|--------|-------------------------|----------|
| P32936 | EDCTPWTATPITPLPSCRDY    | Negative |
| P32936 | ASKSSCDLLLA AVLVSIFAA   | Negative |
| P32936 | MASKSSCDLLLA AVLVSIFA   | Negative |
| P32936 | IFAAVA AVGSEDCTPWTATP   | Negative |
| P32936 | VLVSIFAAVA AVGSEDCTPW   | Negative |
| P32936 | LLLA AVLVSIFA AVA AVGSE | Negative |
| P32936 | DLLLA AVLVSIFA AVA AVGS | Negative |
| P32936 | CTPWTATPITPLPSCRDYVE    | Negative |
| P32936 | LA AVLVSIFA AVA AVGSEDC | Negative |
| P32936 | AAVGSEDCTPWTATPITPLP    | Negative |
| P32936 | AVGSEDCTPWTATPITPLPS    | Negative |
| P32936 | AAVA AVGSEDCTPWTATPIT   | Negative |
| P32936 | GSEDCTPWTATPITPLPSCR    | Negative |
| P32936 | FAVA AVGSEDCTPWTATPI    | Negative |
| P32936 | DCTPWTATPITPLPSCRDYV    | Negative |
| P32936 | SIFA AVA AVGSEDCTPWTAT  | Negative |
| P32936 | SCDLLLA AVLVSIFA AVA AV | Negative |
| P32936 | VGSEDCTPWTATPITPLPSC    | Negative |
| P32936 | AVA AVGSEDCTPWTATPITP   | Negative |
| P32936 | VAAVGSEDCTPWTATPITPL    | Negative |
| P32936 | AVLVSIFA AVA AVGSEDCTP  | Negative |
| P32936 | CDLLLA AVLVSIFA AVA AVG | Negative |
| P32936 | SKSSCDLLLA AVLVSIFA AV  | Negative |
| P33093 | LAFALLCLPWLQEGSAFPTI    | Negative |
| P33093 | QEGSAFPTIPLSRLFDNAML    | Negative |
| P33093 | CLPWLQEGSAFPTIPLSRLF    | Negative |
| P33093 | PTIPLSRLFDNAMLRAHRLH    | Negative |
| P33093 | TSLLAFALLCLPWLQEGSA     | Negative |
| P33093 | ALLCLPWLQEGSAFPTIPLS    | Negative |
| P33093 | LQEGSAFPTIPLSRLFDNAM    | Negative |
| P33093 | FALLCLPWLQEGSAFPTIPL    | Negative |
| P33093 | LLAFALLCLPWLQEGSAFP     | Negative |
| P33093 | IPLSRLFDNAMLRAHRLHQL    | Negative |
| P33093 | SRTSLLAFALLCLPWLQEG     | Negative |
| P33093 | LLAFALLCLPWLQEGSAFPT    | Negative |
| P33093 | GSAFPTIPLSRLFDNAMLRA    | Negative |
| P33093 | AAGSRTSLLAFALLCLPWL     | Negative |
| P33093 | AGSRTSLLAFALLCLPWLQ     | Negative |
| P33093 | PWLQEGSAFPTIPLSRLFDN    | Negative |
| P33093 | SLLAFALLCLPWLQEGSAF     | Negative |
| P33093 | FPTIPLSRLFDNAMLRAHRL    | Negative |
| P33093 | MAAGSRTSLLAFALLCLPW     | Negative |
| P33093 | EGSAFPTIPLSRLFDNAML     | Negative |
| P33093 | TIPLSRLFDNAMLRAHRLHQ    | Negative |
| P33093 | LCLPWLQEGSAFPTIPLSRL    | Negative |
| P33093 | GSRTSLLAFALLCLPWLQE     | Negative |

|        |                      |          |
|--------|----------------------|----------|
| P33093 | AFPTIPLSRLFDNAMLRAHR | Negative |
| P33093 | SAFPTIPLSRLFDNAMLRAH | Negative |
| P33093 | WLQEGSAFPTIPLSRLFDNA | Negative |
| P33093 | RTSLLLAFALLCLPWLQEGS | Negative |
| P33093 | LPWLQEGSAFPTIPLSRLFD | Negative |
| P33093 | LLCLPWLQEGSAFPTIPLSR | Negative |
| P33129 | HLTRIATFCALLYCNTAFSA | Negative |
| P33129 | TRIATFCALLYCNTAFSAEL | Negative |
| P33129 | AELVEYDHTFLMGQNASNID | Negative |
| P33129 | LYCNTAFSAELVEYDHTFLM | Negative |
| P33129 | RIATFCALLYCNTAFSAELV | Negative |
| P33129 | TIEYTKNYHHLTRIATFCAL | Negative |
| P33129 | YCNATFSAELVEYDHTFLMG | Negative |
| P33129 | SAELVEYDHTFLMGQNASNI | Negative |
| P33129 | YTKNYHHLTRIATFCALLYC | Negative |
| P33129 | KNYHHLTRIATFCALLYCNT | Negative |
| P33129 | IEYTKNYHHLTRIATFCALL | Negative |
| P33129 | CALLYCNTAFSAELVEYDHT | Negative |
| P33129 | NTAFSAELVEYDHTFLMGQN | Negative |
| P33129 | TFCALLYCNTAFSAELVEYD | Negative |
| P33129 | TKNYHHLTRIATFCALLYCN | Negative |
| P33129 | CNTAFSAELVEYDHTFLMGQ | Negative |
| P33129 | EYTKNYHHLTRIATFCALLY | Negative |
| P33129 | AFSAELVEYDHTFLMGQNAS | Negative |
| P33129 | TAFSAELVEYDHTFLMGQNA | Negative |
| P33129 | LLYCNATFSAELVEYDHTFL | Negative |
| P33129 | ALLYCNATFSAELVEYDHTF | Negative |
| P33129 | MTIEYTKNYHHLTRIATFCA | Negative |
| P33129 | FCALLYCNTAFSAELVEYDH | Negative |
| P33129 | LTRIATFCALLYCNTAFSAE | Negative |
| P33129 | YHHLTRIATFCALLYCNTAF | Negative |
| P33129 | HHLTRIATFCALLYCNTAFS | Negative |
| P33129 | NYHHLTRIATFCALLYCNTA | Negative |
| P33129 | ATFCALLYCNTAFSAELVEY | Negative |
| P33129 | FSAELVEYDHTFLMGQNASN | Negative |
| P33136 | DVAKQAQSLAGKGYETPKSN | Negative |
| P33136 | KMRWLSAAVMLTLYTSSSWA | Negative |
| P33136 | TLYTSSSWAFSIDDVAKQAQ | Negative |
| P33136 | VAKQAQSLAGKGYETPKSNL | Negative |
| P33136 | AFSIDDVAKQAQSLAGKGYE | Negative |
| P33136 | VMLTLYTSSSWAFSIDDVAK | Negative |
| P33136 | SWAFSIDDVAKQAQSLAGKG | Negative |
| P33136 | WLSAAVMLTLYTSSSWAFSI | Negative |
| P33136 | LTYTSSSWAFSIDDVAKQA  | Negative |
| P33136 | RWLSAAVMLTLYTSSSWAFS | Negative |
| P33136 | MRWLSAAVMLTLYTSSSWAF | Negative |

|        |                      |          |
|--------|----------------------|----------|
| P33136 | IDDVAKQAQSLAGKGYETPK | Negative |
| P33136 | LSAAVMLTLYTSSSWAFSID | Negative |
| P33136 | WAFSIDDVAKQAQSLAGKGY | Negative |
| P33136 | FSIDDVAKQAQSLAGKGYET | Negative |
| P33136 | KQAQSLAGKGYETPKSNLPS | Negative |
| P33136 | AAVMLTLYTSSSWAFSIDDV | Negative |
| P33136 | AVMLTLYTSSSWAFSIDDVA | Negative |
| P33136 | TSSSWAFSIDDVAKQAQSLA | Negative |
| P33136 | SSWAFSIDDVAKQAQSLAGK | Negative |
| P33136 | AKQAQSLAGKGYETPKSNLP | Negative |
| P33136 | YTSSSWAFSIDDVAKQAQSL | Negative |
| P33136 | SSSWAFSIDDVAKQAQSLAG | Negative |
| P33136 | MLTLYTSSSWAFSIDDVAKQ | Negative |
| P33136 | SIDDVAKQAQSLAGKGYETP | Negative |
| P33136 | MMKMRWLSAAVMLTLYTSSS | Negative |
| P33136 | LYTSSSWAFSIDDVAKQAQS | Negative |
| P33136 | DDVAKQAQSLAGKGYETPKS | Negative |
| P33136 | MKMRWLSAAVMLTLYTSSSW | Negative |
| P33183 | YFYIVVLAICSVGIQGIDYP | Negative |
| P33183 | QGIDYPSVSFNLDGAKSATY | Negative |
| P33183 | LAICSVGIQGIDYPSVSFNL | Negative |
| P33183 | ICSVGIQGIDYPSVSFNLDG | Negative |
| P33183 | VGIQGIDYPSVSFNLDGAKS | Negative |
| P33183 | VLAICSVGIQGIDYPSVSFN | Negative |
| P33183 | AAMLYFYIVVLAICSVGIQG | Negative |
| P33183 | DYPSVSFNLDGAKSATYRDF | Negative |
| P33183 | SVSFNLDGAKSATYRDFLSN | Negative |
| P33183 | GIQGIDYPSVSFNLDGAKSA | Negative |
| P33183 | PSVSFNLDGAKSATYRDFLS | Negative |
| P33183 | IQGIDYPSVSFNLDGAKSAT | Negative |
| P33183 | AICSVGIQGIDYPSVSFNLD | Negative |
| P33183 | VVLAICSVGIQGIDYPSVSF | Negative |
| P33183 | VAAAMLYFYIVVLAICSVGI | Negative |
| P33183 | YIVVLAICSVGIQGIDYPSV | Negative |
| P33183 | LYFYIVVLAICSVGIQGIDY | Negative |
| P33183 | SVGIQGIDYPSVSFNLDGAK | Negative |
| P33183 | AAAMLYFYIVVLAICSVGIQ | Negative |
| P33183 | IDYPSVSFNLDGAKSATYRD | Negative |
| P33183 | VVAAAMLYFYIVVLAICSVG | Negative |
| P33183 | AMLYFYIVVLAICSVGIQGI | Negative |
| P33183 | YPSVSFNLDGAKSATYRDFL | Negative |
| P33183 | MRVVAAAMLYFYIVVLAICS | Negative |
| P33183 | MLYFYIVVLAICSVGIQGID | Negative |
| P33183 | IVVLAICSVGIQGIDYPSVS | Negative |
| P33183 | CSVGIQGIDYPSVSFNLDGA | Negative |
| P33183 | GIDYPSVSFNLDGAKSATYR | Negative |



|        |                      |          |
|--------|----------------------|----------|
| P33183 | RVVAAAMLYFYIVVLAICSV | Negative |
| P33185 | LILTIFLKSPTVEGDVSFRL | Negative |
| P33185 | IKLLVLWLLILTIFLKSPTV | Negative |
| P33185 | PTVEGDVSFRLSGATTTSYG | Negative |
| P33185 | MIKLLVLWLLILTIFLKSPT | Negative |
| P33185 | ILTIFLKSPTVEGDVSFRLS | Negative |
| P33185 | KSPTVEGDVSFRLSGATTTS | Negative |
| P33185 | GDVSFRLSGATTTSYGVFIK | Negative |
| P33185 | LVLWLLILTIFLKSPTVEGD | Negative |
| P33185 | LKSPTVEGDVSFRLSGATTT | Negative |
| P33185 | IFLKSPTVEGDVSFRLSGAT | Negative |
| P33185 | KLLVLWLLILTIFLKSPTVE | Negative |
| P33185 | VLWLLILTIFLKSPTVEGDV | Negative |
| P33185 | EGDVSFRLSGATTTSYGVFI | Negative |
| P33185 | LTIFLKSPTVEGDVSFRLSG | Negative |
| P33185 | LSGATTTSYGVFIKNLREAL | Negative |
| P33185 | TVEGDVSFRLSGATTTSYGV | Negative |
| P33185 | FRLSGATTTSYGVFIKNLRE | Negative |
| P33185 | SGATTTSYGVFIKNLREALP | Negative |
| P33185 | RLSGATTTSYGVFIKNLREA | Negative |
| P33185 | FLKSPTVEGDVSFRLSGATT | Negative |
| P33185 | SFRLSGATTTSYGVFIKNLR | Negative |
| P33185 | WLLILTIFLKSPTVEGDVSF | Negative |
| P33185 | TIFLKSPTVEGDVSFRLSGA | Negative |
| P33185 | LWLLILTIFLKSPTVEGDVS | Negative |
| P33185 | VEGDVSFRLSGATTTSYGVF | Negative |
| P33185 | LLVLWLLILTIFLKSPTVEG | Negative |
| P33185 | DVSFRLSGATTTSYGVFIKN | Negative |
| P33185 | SPTVEGDVSFRLSGATTTSY | Negative |
| P33185 | VSFRLSGATTTSYGVFIKNL | Negative |
| P33219 | GAFLGLLLVSACASVFAANN | Negative |
| P33219 | TSKSVTFPKCEDLDAAGIAA | Negative |
| P33219 | KKRGAFLGLLLVSACASVFA | Negative |
| P33219 | ANNETSKSVTFPKCEDLDAA | Negative |
| P33219 | ETSKSVTFPKCEDLDAAGIA | Negative |
| P33219 | VFAANNETSKSVTFPKCEDL | Negative |
| P33219 | LLLVSACASVFAANNETSKS | Negative |
| P33219 | CASVFAANNETSKSVTFPKC | Negative |
| P33219 | RGAFLGLLLVSACASVFAAN | Negative |
| P33219 | SKSVTFPKCEDLDAAGIAAS | Negative |
| P33219 | KSVTFPKCEDLDAAGIAASV | Negative |
| P33219 | MKKRGAFLGLLLVSACASVF | Negative |
| P33219 | ASVFAANNETSKSVTFPKCE | Negative |
| P33219 | LVSACASVFAANNETSKSVT | Negative |
| P33219 | GLLLVSACASVFAANNETSK | Negative |
| P33219 | VSACASVFAANNETSKSVTF | Negative |

|        |                       |          |
|--------|-----------------------|----------|
| P33219 | ACASVFAANNETSKSVTFPK  | Negative |
| P33219 | FAANNETSKSVTFPKCEDLD  | Negative |
| P33219 | AFLGLLLVSACASVFAANNE  | Negative |
| P33219 | SVFAANNETSKSVTFPKCED  | Negative |
| P33219 | SACASVFAANNETSKSVTFP  | Negative |
| P33219 | LGLLLVSACASVFAANNETS  | Negative |
| P33219 | LLVSACASVFAANNETSKSV  | Negative |
| P33219 | NETSKSVTFPKCEDLDAAGI  | Negative |
| P33219 | AANNETSKSVTFPKCEDLDA  | Negative |
| P33219 | VTFPKCEDLDAAGIAASVKR  | Negative |
| P33219 | KRGAFLLGLLLVSACASVFAA | Negative |
| P33219 | SVTFPKCEDLDAAGIAASVK  | Negative |
| P33219 | NNETSKSVTFPKCEDLDAAG  | Negative |
| P33406 | LMLASGGMVNMVHAEPTVIN  | Negative |
| P33406 | SGGMVNMVHAEPTVINSKDI  | Negative |
| P33406 | KPLAIAVLMLASGGMVNMVH  | Negative |
| P33406 | EPTVINSKDISATKTVKEGG  | Negative |
| P33406 | MNMKKFVKKPLAIAVLMLAS  | Negative |
| P33406 | MVNMVHAEPTVINSKDISAT  | Negative |
| P33406 | MVHAEPTVINSKDISATKTV  | Negative |
| P33406 | VKKPLAIAVLMLASGGMVNM  | Negative |
| P33406 | MKKFVKKPLAIAVLMLASGG  | Negative |
| P33406 | PLAIAVLMLASGGMVNMVHA  | Negative |
| P33406 | LIAVLMLASGGMVNMVHAE   | Negative |
| P33406 | VHAEPTVINSKDISATKTVK  | Negative |
| P33406 | LASGGMVNMVHAEPTVINSK  | Negative |
| P33406 | NMKKFVKKPLAIAVLMLASG  | Negative |
| P33406 | MLASGGMVNMVHAEPTVINS  | Negative |
| P33406 | FVKKPLAIAVLMLASGGMVN  | Negative |
| P33406 | AEPTVINSKDISATKTVKEG  | Negative |
| P33406 | KKFVKKPLAIAVLMLASGGM  | Negative |
| P33406 | GMVNMVHAEPTVINSKDISA  | Negative |
| P33406 | VNMVHAEPTVINSKDISATK  | Negative |
| P33406 | KFVKKPLAIAVLMLASGGMV  | Negative |
| P33406 | AVLMLASGGMVNMVHAEPTV  | Negative |
| P33406 | HAEPTVINSKDISATKTVKE  | Negative |
| P33406 | IAVLMLASGGMVNMVHAEPT  | Negative |
| P33406 | IAVLMLASGGMVNMVHAEPT  | Negative |
| P33406 | GGMVNMVHAEPTVINSKDIS  | Negative |
| P33406 | ASGGMVNMVHAEPTVINSKD  | Negative |
| P33406 | KKPLAIAVLMLASGGMVNMV  | Negative |
| P33406 | NMVHAEPTVINSKDISATKT  | Negative |
| P33436 | VLCVLCCLLGHAIAAPSPII  | Negative |
| P33436 | LCCLLGHAIAAPSPIIKFPG  | Negative |
| P33436 | VGPLRVLCVLCCLLGHAIAA  | Negative |
| P33436 | WGVLVGPLRVLCVLCCLLGH  | Negative |

|        |                      |          |
|--------|----------------------|----------|
| P33436 | LGHAIAAPSPIIKFPGDVSP | Negative |
| P33436 | CVLCCLLGHAIAAPSPIIKF | Negative |
| P33436 | PLRVLCVLCCLLGHAIAAPS | Negative |
| P33436 | APSPIIKFPGDVSPKTDKEL | Negative |
| P33436 | CCLLGHAIAAPSPIIKFPGD | Negative |
| P33436 | RLVWGVLVGPLRVLCVLCCL | Negative |
| P33436 | MEARLVWGVLVGPLRVLCVL | Negative |
| P33436 | VLVGPLRVLCVLCCLLGHA  | Negative |
| P33436 | VLCCLLGHAIAAPSPIIKFP | Negative |
| P33436 | IAAPSPIIKFPGDVSPKTDK | Negative |
| P33436 | EARLVWGVLVGPLRVLCVLC | Negative |
| P33436 | VWGVLVGPLRVLCVLCCLLG | Negative |
| P33436 | GHAIAAPSPIIKFPGDVSPK | Negative |
| P33436 | AIAAPSPIIKFPGDVSPKTD | Negative |
| P33436 | LRVLCVLCCLLGHAIAAPSP | Negative |
| P33436 | GVLVGPLRVLCVLCCLLGHA | Negative |
| P33436 | LVWGVLVGPLRVLCVLCCLL | Negative |
| P33436 | CLLGHAIAAPSPIIKFPGDV | Negative |
| P33436 | GPLRVLCVLCCLLGHAIAAP | Negative |
| P33436 | AAPSPIIKFPGDVSPKTDKE | Negative |
| P33436 | LCVLCCLLGHAIAAPSPIIK | Negative |
| P33436 | ARLVWGVLVGPLRVLCVLC  | Negative |
| P33436 | HAAAPSPIIKFPGDVSPKT  | Negative |
| P33436 | LVGPLRVLCVLCCLLGHAIA | Negative |
| P33436 | LLGHAIAAPSPIIKFPGDVS | Negative |
| P33487 | FYFSETSLGAPCPINGLPIV | Negative |
| P33487 | LLFYFSETSLGAPCPINGLP | Negative |
| P33487 | YFSETSLGAPCPINGLPVR  | Negative |
| P33487 | VVFSVALLLFYFSETSLGAP | Negative |
| P33487 | IVLSVGSASSSPIVVFSVA  | Negative |
| P33487 | TSLGAPCPINGLPVRNISR  | Negative |
| P33487 | FSVALLLFYFSETSLGAPCP | Negative |
| P33487 | ETSLGAPCPINGLPVRNIS  | Negative |
| P33487 | ASSSPIVVFSVALLLFYFS  | Negative |
| P33487 | SVGSASSSPIVVFSVALLL  | Negative |
| P33487 | PIVVFSVALLLFYFSETSL  | Negative |
| P33487 | FSETSLGAPCPINGLPVRN  | Negative |
| P33487 | LFYFSETSLGAPCPINGLPI | Negative |
| P33487 | GSASSSPIVVFSVALLLFY  | Negative |
| P33487 | LLFYFSETSLGAPCPINGL  | Negative |
| P33487 | LSVGSASSSPIVVFSVALL  | Negative |
| P33487 | VLSVGSASSSPIVVFSVAL  | Negative |
| P33487 | VALLLFYFSETSLGAPCPIN | Negative |
| P33487 | IVVFSVALLLFYFSETSLG  | Negative |
| P33487 | VFSVALLLFYFSETSLGAPC | Negative |
| P33487 | SSPIVVFSVALLLFYFSET  | Negative |

|        |                      |          |
|--------|----------------------|----------|
| P33487 | SPIVVVFSVALLLFYFSETS | Negative |
| P33487 | SETSLGAPCPINGLPVRNI  | Negative |
| P33487 | VGSASSSPIVVVFSVALLLF | Negative |
| P33487 | VVVFSVALLLFYFSETSLGA | Negative |
| P33487 | ALLLFYFSETSLGAPCPING | Negative |
| P33487 | SSSPIVVVFSVALLLFYFSE | Negative |
| P33487 | MIVLSVGSASSSPIVVVFSV | Negative |
| P33487 | SASSSPIVVVFSVALLLFYF | Negative |
| P33557 | MKVTAAGFAGLLVTAFAPVP | Negative |
| P33557 | EPVLVSRGAGINIVQNYNGN | Negative |
| P33557 | AGLLVTAFAPVPEPVLVSR  | Negative |
| P33557 | PVPEPVLVSRGAGINIVQNY | Negative |
| P33557 | VTAFAPVPEPVLVSRGAGI  | Negative |
| P33557 | AFAGLLVTAFAPVPEPVLV  | Negative |
| P33557 | VTAGFAGLLVTAFAPVPEP  | Negative |
| P33557 | KVTAAGFAGLLVTAFAPVPE | Negative |
| P33557 | PEPVLVSRGAGINIVQNYNG | Negative |
| P33557 | VLVSRGAGINIVQNYNGNLG | Negative |
| P33557 | AFAPVPEPVLVSRGAGINIV | Negative |
| P33557 | VSRGAGINIVQNYNGNLGDF | Negative |
| P33557 | VPEPVLVSRGAGINIVQNYN | Negative |
| P33557 | LVSRGAGINIVQNYNGNLGD | Negative |
| P33557 | FAAPVPEPVLVSRGAGINIV | Negative |
| P33557 | AAPVPEPVLVSRGAGINIVQ | Negative |
| P33557 | PVLVSRGAGINIVQNYNGNL | Negative |
| P33557 | GINIVQNYNGNLGDFTYDES | Negative |
| P33557 | FAGLLVTAFAPVPEPVLVS  | Negative |
| P33557 | LVTAFAAPVPEPVLVSRGAG | Negative |
| P33557 | TAGFAGLLVTAFAPVPEPV  | Negative |
| P33557 | GLLVTAFAAPVPEPVLVSRG | Negative |
| P33557 | AGFAGLLVTAFAPVPEPVL  | Negative |
| P33557 | APVPEPVLVSRGAGINIVQN | Negative |
| P33557 | AGINIVQNYNGNLGDFTYDE | Negative |
| P33557 | SRGAGINIVQNYNGNLGDFT | Negative |
| P33557 | LLVTAFAPVPEPVLVSRGAG | Negative |
| P33557 | RGAGINIVQNYNGNLGDFTY | Negative |
| P33557 | SAGINIVQNYNGNLGDFTYD | Negative |
| P33559 | SIDTKFKAHGKKYLGNIQDQ | Negative |
| P33559 | KAAALAMLFASHVLSEPIEP | Negative |
| P33559 | ALAMLFASHVLSEPIEPRQA | Negative |
| P33559 | RQASVSIDTKFKAHGKKYLG | Negative |
| P33559 | VLSEPIEPRQASVSIDTKFK | Negative |
| P33559 | HVLSEPIEPRQASVSIDTKF | Negative |
| P33559 | LAMLFASHVLSEPIEPRQAS | Negative |
| P33559 | ASVSIDTKFKAHGKKYLGNI | Negative |
| P33559 | MVQIKAAALAMLFASHVLSE | Negative |

|        |                      |          |
|--------|----------------------|----------|
| P33559 | ASHVLSEPIEPRQASVSIDT | Negative |
| P33559 | SHVLSEPIEPRQASVSIDTK | Negative |
| P33559 | EPRQASVSIDTKFKAHGKKY | Negative |
| P33559 | LFASHVLSEPIEPRQASVSI | Negative |
| P33559 | VQIKAAALAMLFASHVLSEP | Negative |
| P33559 | PRQASVSIDTKFKAHGKKYL | Negative |
| P33559 | IEPRQASVSIDTKFKAHGKK | Negative |
| P33559 | LSEPIEPRQASVSIDTKFKA | Negative |
| P33559 | AALAMLFASHVLSEPIEPRQ | Negative |
| P33559 | AAALAMLFASHVLSEPIEPR | Negative |
| P33559 | FASHVLSEPIEPRQASVSID | Negative |
| P33559 | QIKAAALAMLFASHVLSEPI | Negative |
| P33559 | QASVSIDTKFKAHGKKYLG  | Negative |
| P33559 | SVSIDTKFKAHGKKYLG    | Negative |
| P33559 | PIEPRQASVSIDTKFKAHGK | Negative |
| P33559 | IKAAALAMLFASHVLSEPIE | Negative |
| P33559 | EPIEPRQASVSIDTKFKAHG | Negative |
| P33559 | AMLFASHVLSEPIEPRQASV | Negative |
| P33559 | SEPIEPRQASVSIDTKFKAH | Negative |
| P33559 | VSIDTKFKAHGKKYLG     | Negative |
| P33575 | KQTVSTLSTGYLGHPVVGGL | Negative |
| P33575 | QALLVLALLHLATATPVIGK | Negative |
| P33575 | MAAAIQALLVLALLHLATAT | Negative |
| P33575 | IGKQTVSTLSTGYLGHPVVG | Negative |
| P33575 | AAAIQALLVLALLHLATATP | Negative |
| P33575 | ALLHLATATPVIGKQTVSTL | Negative |
| P33575 | TVSTLSTGYLGHPVVGGLGY | Negative |
| P33575 | AIQALLVLALLHLATATPVI | Negative |
| P33575 | LATATPVIGKQTVSTLSTGY | Negative |
| P33575 | LHLATATPVIGKQTVSTLST | Negative |
| P33575 | TLSTGYLGHPVVGGLGYGGL | Negative |
| P33575 | LLVLALLHLATATPVIGKQT | Negative |
| P33575 | VIGKQTVSTLSTGYLGHPVV | Negative |
| P33575 | TPVIGKQTVSTLSTGYLGHP | Negative |
| P33575 | STLSTGYLGHPVVGGLGYGG | Negative |
| P33575 | QTVSTLSTGYLGHPVVGGLG | Negative |
| P33575 | GKQTVSTLSTGYLGHPVVG  | Negative |
| P33575 | VSTLSTGYLGHPVVGGLGYG | Negative |
| P33575 | ATPVIGKQTVSTLSTGYLG  | Negative |
| P33575 | HLATATPVIGKQTVSTLSTG | Negative |
| P33575 | LLHLATATPVIGKQTVSTLS | Negative |
| P33575 | ALLVLALLHLATATPVIGKQ | Negative |
| P33575 | LVLALLHLATATPVIGKQTV | Negative |
| P33575 | AAIQALLVLALLHLATATPV | Negative |
| P33575 | ATATPVIGKQTVSTLSTGYL | Negative |
| P33575 | TATPVIGKQTVSTLSTGYLG | Negative |

|        |                       |          |
|--------|-----------------------|----------|
| P33575 | PVIGKQTVSTLSTGYLGHPV  | Negative |
| P33575 | VLALLHLATATPVIGKQTVS  | Negative |
| P33575 | LALLHLATATPVIGKQTVST  | Negative |
| P33577 | ATATPVVTKHKVSTFSTGFL  | Negative |
| P33577 | IALLLHLATATPVVTKHKVST | Negative |
| P33577 | TFSTGFLGHPVGGLGYGGLG  | Negative |
| P33577 | ATPVVTKHKVSTFSTGFLGH  | Negative |
| P33577 | TPVVTKHKVSTFSTGFLGHP  | Negative |
| P33577 | VVTKHKVSTFSTGFLGHPVG  | Negative |
| P33577 | TATPVVTKHKVSTFSTGFLG  | Negative |
| P33577 | ATMQALLVIALLLHLATATPV | Negative |
| P33577 | QALLVIALLLHLATATPVVTK | Negative |
| P33577 | TMQALLVIALLLHLATATPVV | Negative |
| P33577 | LVIALLLHLATATPVVTKHKV | Negative |
| P33577 | TKHKVSTFSTGFLGHPVGGL  | Negative |
| P33577 | LLHLATATPVVTKHKVSTFS  | Negative |
| P33577 | MAATMQALLVIALLLHLATAT | Negative |
| P33577 | LATATPVVTKHKVSTFSTGF  | Negative |
| P33577 | KHKVSTFSTGFLGHPVGGLG  | Negative |
| P33577 | ALLHLATATPVVTKHKVSTF  | Negative |
| P33577 | VTCHKVSTFSTGFLGHPVGG  | Negative |
| P33577 | LHLATATPVVTKHKVSTFST  | Negative |
| P33577 | HLATATPVVTKHKVSTFSTG  | Negative |
| P33577 | VIALLLHLATATPVVTKHKVS | Negative |
| P33577 | LLVIALLLHLATATPVVTKHK | Negative |
| P33577 | AATMQALLVIALLLHLATATP | Negative |
| P33577 | PVVTKHKVSTFSTGFLGHPV  | Negative |
| P33577 | HKVSTFSTGFLGHPVGGLGY  | Negative |
| P33577 | STFSTGFLGHPVGGLGYGGL  | Negative |
| P33577 | VSTFSTGFLGHPVGGLGYGG  | Negative |
| P33577 | KVSTFSTGFLGHPVGGLGYG  | Negative |
| P33577 | ALLVIALLLHLATATPVVTKH | Negative |
| P33579 | MELALSQPSFFGTLLMLVVS  | Negative |
| P33579 | LVVSNLLLWEKAASIPACMV  | Negative |
| P33579 | LLLWEKAASIPACMVEDGGC  | Negative |
| P33579 | VVSNLLLWEKAASIPACMVE  | Negative |
| P33579 | VSNLLLWEKAASIPACMVED  | Negative |
| P33579 | SFFGTLLMLVVSNLLLWEKA  | Negative |
| P33579 | ASIPACMVEDGGCWDPLREA  | Negative |
| P33579 | ALSQPSFFGTLLMLVVSNLL  | Negative |
| P33579 | QPSFFGTLLMLVVSNLLLWE  | Negative |
| P33579 | FFGTLLMLVVSNLLLWEKAA  | Negative |
| P33579 | SNLLLWEKAASIPACMVEDG  | Negative |
| P33579 | GTLMLVVSNLLLWEKAASI   | Negative |
| P33579 | WEKAASIPACMVEDGGCWDP  | Negative |
| P33579 | LSQPSFFGTLLMLVVSNLLL  | Negative |

|        |                      |          |
|--------|----------------------|----------|
| P33579 | EKAASIPACMVEDGGCWDPL | Negative |
| P33579 | KAASIPACMVEDGGCWDPLR | Negative |
| P33579 | TLLMLVVSNNLLWEKAASIP | Negative |
| P33579 | LMLVVSNNLLWEKAASIPAC | Negative |
| P33579 | ELALSQPSFFGTLLMLVVS  | Negative |
| P33579 | AASIPACMVEDGGCWDPLRE | Negative |
| P33579 | NLLWEKAASIPACMVEDGG  | Negative |
| P33579 | SIPACMVEDGGCWDPLREAF | Negative |
| P33579 | LALSQPSFFGTLLMLVVS   | Negative |
| P33579 | LWEKAASIPACMVEDGGCWD | Negative |
| P33579 | SQPSFFGTLLMLVVSNNLLW | Negative |
| P33579 | LLMLVVSNNLLWEKAASIPA | Negative |
| P33579 | LLWEKAASIPACMVEDGGCW | Negative |
| P33579 | PSFFGTLLMLVVSNNLLWEK | Negative |
| P33579 | FGTLLMLVVSNNLLWEKAAS | Negative |
| P33665 | LAVVLTAIASLATAGVGYA  | Negative |
| P33665 | YASTQASTAVKAGAGLDDPH | Negative |
| P33665 | TAIASLATAGVGYASTQAS  | Negative |
| P33665 | AIASLATAGVGYASTQAST  | Negative |
| P33665 | ASLATAGVGYASTQASTAVK | Negative |
| P33665 | HRTARIALAVVLTAIASLA  | Negative |
| P33665 | SQHRTARIALAVVLTAIAS  | Negative |
| P33665 | LTAIASLATAGVGYASTQA  | Negative |
| P33665 | ALAVVLTAIASLATAGVGY  | Negative |
| P33665 | IASLATAGVGYASTQASTAV | Negative |
| P33665 | LATAGVGYASTQASTAVKAG | Negative |
| P33665 | IALAVVLTAIASLATAGVG  | Negative |
| P33665 | VVLTAIASLATAGVGYAST  | Negative |
| P33665 | AVVLTAIASLATAGVGYAS  | Negative |
| P33665 | IPASLATAGVGYASTQASTA | Negative |
| P33665 | ATAGVGYASTQASTAVKAGA | Negative |
| P33665 | RTARIALAVVLTAIASLAT  | Negative |
| P33665 | GVGYASTQASTAVKAGAGLD | Negative |
| P33665 | HSQHRTARIALAVVLTAI   | Negative |
| P33665 | VGYASTQASTAVKAGAGLDD | Negative |
| P33665 | VLTAIASLATAGVGYASTQ  | Negative |
| P33665 | TARIALAVVLTAIASLATA  | Negative |
| P33665 | GYASTQASTAVKAGAGLDDP | Negative |
| P33665 | RIALAVVLTAIASLATAGV  | Negative |
| P33665 | SLATAGVGYASTQASTAVKA | Negative |
| P33665 | TAGVGYASTQASTAVKAGAG | Negative |
| P33665 | QHRTARIALAVVLTAIASL  | Negative |
| P33665 | ARIALAVVLTAIASLATAG  | Negative |
| P33665 | MHSQHRTARIALAVVLTAI  | Negative |
| P33679 | CPFTVWAASVPVGGGRQLNR | Negative |
| P33679 | SVAIVGIFVALLAVAGEAAV | Negative |

|        |                      |          |
|--------|----------------------|----------|
| P33679 | AAVFTVVNQCPFTVWAASVP | Negative |
| P33679 | IFVALLAVAGEAAVFTVVNQ | Negative |
| P33679 | ALLAVAGEAAVFTVVNQCPF | Negative |
| P33679 | AGEAAVFTVVNQCPFTVWAA | Negative |
| P33679 | TVVNQCPFTVWAASVPVGGG | Negative |
| P33679 | LAVAGEAAVFTVVNQCPFTV | Negative |
| P33679 | IVGIFVALLAVAGEAAVFTV | Negative |
| P33679 | EAAVFTVVNQCPFTVWAASV | Negative |
| P33679 | AVAGEAAVFTVVNQCPFTVW | Negative |
| P33679 | VVNQCPFTVWAASVPVGGGR | Negative |
| P33679 | AGSVAIVGIFVALLAVAGEA | Negative |
| P33679 | GEAAVFTVVNQCPFTVWAAS | Negative |
| P33679 | NQCPFTVWAASVPVGGGRQL | Negative |
| P33679 | VAGEAAVFTVVNQCPFTVWA | Negative |
| P33679 | VNQCPFTVWAASVPVGGGRQ | Negative |
| P33679 | QCPFTVWAASVPVGGGRQLN | Negative |
| P33679 | FTVVNQCPFTVWAASVPVGG | Negative |
| P33679 | GSVAIVGIFVALLAVAGEAA | Negative |
| P33679 | MAGSVAIVGIFVALLAVAGE | Negative |
| P33679 | LLAVAGEAAVFTVVNQCPFT | Negative |
| P33679 | GIFVALLAVAGEAAVFTVVN | Negative |
| P33679 | VFTVVNQCPFTVWAASVPVG | Negative |
| P33679 | AVFTVVNQCPFTVWAASVPV | Negative |
| P33679 | FVALLAVAGEAAVFTVVNQC | Negative |
| P33679 | VAIVGIFVALLAVAGEAAVF | Negative |
| P33679 | VALLAVAGEAAVFTVVNQCP | Negative |
| P33679 | VGIFVALLAVAGEAAVFTVV | Negative |
| P33682 | AALCALPLAFAAAPPAHAAD | Negative |
| P33682 | HAADPTTMTNGFYADPDSSA | Negative |
| P33682 | AAPPAHAADPTTMTNGFYAD | Negative |
| P33682 | APPAHAADPTTMTNGFYADP | Negative |
| P33682 | ADPTTMTNGFYADPDSSASR | Negative |
| P33682 | PTTMTNGFYADPDSSASRWA | Negative |
| P33682 | MSRKLRTLMAALCALPLAFA | Negative |
| P33682 | PLAFAAAPPAHAADPTMTN  | Negative |
| P33682 | PAHAADPTTMTNGFYADPDS | Negative |
| P33682 | KLRTLMAALCALPLAFAAAP | Negative |
| P33682 | AHAADPTTMTNGFYADPDSS | Negative |
| P33682 | FAAAPPAHAADPTTMTNGFY | Negative |
| P33682 | LCALPLAFAAAPPAHAADPT | Negative |
| P33682 | RKLRTLMAALCALPLAFAAA | Negative |
| P33682 | ALPLAFAAAPPAHAADPTTM | Negative |
| P33682 | LPLAFAAAPPAHAADPTTMT | Negative |
| P33682 | ALCALPLAFAAAPPAHAADP | Negative |
| P33682 | LMAALCALPLAFAAAPPAHA | Negative |
| P33682 | LRTLMAALCALPLAFAAAPP | Negative |



|        |                       |          |
|--------|-----------------------|----------|
| P33682 | SRKLRTLMAALCALPLAFAA  | Negative |
| P33682 | AAAPPAHAADPTTMTNGFYA  | Negative |
| P33682 | AFAAAPPAHAADPTTMTNGF  | Negative |
| P33682 | LAFAAAPPAHAADPTTMTNG  | Negative |
| P33682 | PPAHAADPTTMTNGFYADPD  | Negative |
| P33682 | AADPTTMTNGFYADPDSSAS  | Negative |
| P33682 | RTLMAALCALPLAFAAAPPA  | Negative |
| P33682 | TLMAALCALPLAFAAAPPAH  | Negative |
| P33682 | MAALCALPLAFAAAPPAHAA  | Negative |
| P33682 | DPTTMTNGFYADPDSSASRW  | Negative |
| P33781 | MKKNLLITSVLAMATVSGSV  | Negative |
| P33781 | LAMATVSGSVLAAVTNGQLT  | Negative |
| P33781 | QLTFNWQGVVPSAPVTQSSW  | Negative |
| P33781 | GQLTFNWQGVVPSAPVTQSS  | Negative |
| P33781 | LTTFNWQGVVPSAPVTQSSWA | Negative |
| P33781 | AAVTNGQLTFNWQGVVPSAP  | Negative |
| P33781 | LAAVTNGQLTFNWQGVVPSA  | Negative |
| P33781 | SVLAMATVSGSVLAAVTNGQ  | Negative |
| P33781 | VLAMATVSGSVLAAVTNGQL  | Negative |
| P33781 | KNLLITSVLAMATVSGSVLA  | Negative |
| P33781 | SVLAAVTNGQLTFNWQGVVP  | Negative |
| P33781 | TFNWQGVVPSAPVTQSSWAF  | Negative |
| P33781 | VSGSVLAAVTNGQLTFNWQG  | Negative |
| P33781 | LLITSVLAMATVSGSVLAAV  | Negative |
| P33781 | TVSGSVLAAVTNGQLTFNWQ  | Negative |
| P33781 | GSVLAAVTNGQLTFNWQGVV  | Negative |
| P33781 | LITSVLAMATVSGSVLAAVT  | Negative |
| P33781 | ITSVLAMATVSGSVLAAVTN  | Negative |
| P33781 | NLLITSVLAMATVSGSVLAA  | Negative |
| P33781 | VTNGQLTFNWQGVVPSAPVT  | Negative |
| P33781 | KKNLLITSVLAMATVSGSVL  | Negative |
| P33781 | NGQLTFNWQGVVPSAPVTQS  | Negative |
| P33781 | AVTNGQLTFNWQGVVPSAPV  | Negative |
| P33781 | SGSVLAAVTNGQLTFNWQGV  | Negative |
| P33781 | ATVSGSVLAAVTNGQLTFNW  | Negative |
| P33781 | VLAAVTNGQLTFNWQGVVPS  | Negative |
| P33781 | MATVSGSVLAAVTNGQLTFN  | Negative |
| P33781 | TNGQLTFNWQGVVPSAPVTQ  | Negative |
| P33781 | AMATVSGSVLAAVTNGQLTF  | Negative |
| P33937 | RAVVGQQEAIKWDAKPCRF   | Negative |
| P33937 | AAAGLSVPGVARAVVGQQEA  | Negative |
| P33937 | SVPGVARAVVGQQEAIKWDA  | Negative |
| P33937 | AVAAAAAAGLSVPGVARAV   | Negative |
| P33937 | AAAAGLSVPGVARAVVGQQE  | Negative |
| P33937 | AAAAAAGLSVPGVARAVVGQ  | Negative |
| P33937 | KLSRRSFMKANAVAAAAAAA  | Negative |

|        |                       |          |
|--------|-----------------------|----------|
| P33937 | AAAAAGLSVPGVARAVVGQQ  | Negative |
| P33937 | LSRRSFMKANAVAAAAAAG   | Negative |
| P33937 | PGVARAVVGQQEAIKWDAKAP | Negative |
| P33937 | NAVAAAAAAGLSVPGVARA   | Negative |
| P33937 | VPGVARAVVGQQEAIKWDAK  | Negative |
| P33937 | ANAVAAAAAAGLSVPGVAR   | Negative |
| P33937 | VARAVVGQQEAIKWDAKPCR  | Negative |
| P33937 | MKANAVAAAAAAGLSVPGV   | Negative |
| P33937 | RSFMKANAVAAAAAAGLSV   | Negative |
| P33937 | RRSFMKANAVAAAAAAGLS   | Negative |
| P33937 | VAAAAAAGLSVPGVARAVV   | Negative |
| P33937 | SRRSFMKANAVAAAAAAGL   | Negative |
| P33937 | AAAAAAGLSVPGVARAVVG   | Negative |
| P33937 | KANAVAAAAAAGLSVPGVA   | Negative |
| P33937 | MKLSRRSFMKANAVAAAAA   | Negative |
| P33937 | LSVPGVARAVVGQQEAIKW   | Negative |
| P33937 | FMKANAVAAAAAAGLSVPG   | Negative |
| P33937 | AAGLSVPGVARAVVGQQEAI  | Negative |
| P33937 | ARAVVGQQEAIKWDAKPCR   | Negative |
| P33937 | SFMKANAVAAAAAAGLSVP   | Negative |
| P33937 | GVARAVVGQQEAIKWDAKPC  | Negative |
| P33937 | AGLSVPGVARAVVGQQEAIK  | Negative |
| P34095 | THQGEILCNLCTGLINTLEN  | Negative |
| P34095 | GEILCNLCTGLINTLENLLT  | Negative |
| P34095 | AVAFAVTATHQGEILCNLCT  | Negative |
| P34095 | LCNLCTGLINTLENLLTTKG  | Negative |
| P34095 | CTGLINTLENLLTTKGADKV  | Negative |
| P34095 | NLCTGLINTLENLLTTKGAD  | Negative |
| P34095 | TATHQGEILCNLCTGLINTL  | Negative |
| P34095 | VFVLIFAVAFAVTATHQGEI  | Negative |
| P34095 | ATHQGEILCNLCTGLINTLE  | Negative |
| P34095 | MKAIVFVLIFAVAFAVTATH  | Negative |
| P34095 | EILCNLCTGLINTLENLLTT  | Negative |
| P34095 | LCTGLINTLENLLTTKGADK  | Negative |
| P34095 | VTATHQGEILCNLCTGLINT  | Negative |
| P34095 | KAIVFVLIFAVAFAVTATHQ  | Negative |
| P34095 | AIVFVLIFAVAFAVTATHQG  | Negative |
| P34095 | IFAVAFAVTATHQGEILCNL  | Negative |
| P34095 | CNLCTGLINTLENLLTTKGA  | Negative |
| P34095 | LIFAVAFAVTATHQGEILCN  | Negative |
| P34095 | FVLIFAVAFAVTATHQGEIL  | Negative |
| P34095 | ILCNLCTGLINTLENLLTTK  | Negative |
| P34095 | HQGEILCNLCTGLINTLENL  | Negative |
| P34095 | FAVTATHQGEILCNLCTGLI  | Negative |
| P34095 | TGLINTLENLLTTKGADKVK  | Negative |
| P34095 | FAVTATHQGEILCNLCTGL   | Negative |

|        |                       |          |
|--------|-----------------------|----------|
| P34095 | VAFAVTATHQGEILCNLCTG  | Negative |
| P34095 | AVTATHQGEILCNLCTGLIN  | Negative |
| P34095 | FAVAFAVTATHQGEILCNLC  | Negative |
| P34095 | IVFVLIFAVAFAVTATHQGE  | Negative |
| P34095 | QGEILCNLCTGLINTLENLL  | Negative |
| P34096 | VQPSYGQDGMVQRFLRQHVH  | Negative |
| P34096 | LGLGLVQPSYGQDGMVQRFL  | Negative |
| P34096 | HSLLLLLLLLTLLGLGLVQPS | Negative |
| P34096 | THSLLLLLLLLTLLGLGLVQP | Negative |
| P34096 | ALQRTHSLLLLLLLLTLLGLG | Negative |
| P34096 | MALQRTHSLLLLLLLLTLLGL | Negative |
| P34096 | LLLTLGLGLVQPSYGQDGM   | Negative |
| P34096 | GLVQPSYGQDGMVQRFLRQH  | Negative |
| P34096 | QRTHSLLLLLLLLTLLGLGLV | Negative |
| P34096 | LLLLLLLLTLLGLGLVQPSYG | Negative |
| P34096 | LVQPSYGQDGMVQRFLRQHV  | Negative |
| P34096 | QDGMVQRFLRQHVHPEETGG  | Negative |
| P34096 | LLLLTLGLGLVQPSYGQDG   | Negative |
| P34096 | YGQDGMVQRFLRQHVHPEET  | Negative |
| P34096 | LGLVQPSYGQDGMVQRFLRQ  | Negative |
| P34096 | PSYGQDGMVQRFLRQHVHPE  | Negative |
| P34096 | GQDGMVQRFLRQHVHPEETG  | Negative |
| P34096 | QPSYGQDGMVQRFLRQHVHP  | Negative |
| P34096 | LQRTHSLLLLLLLLTLLGLGL | Negative |
| P34096 | SLLLLLLLLTLLGLGLVQPSY | Negative |
| P34096 | LTLGLGLVQPSYGQDGMVQ   | Negative |
| P34096 | GLGLVQPSYGQDGMVQRFLR  | Negative |
| P34096 | DGMVQRFLRQHVHPEETGGS  | Negative |
| P34096 | TLLGLGLVQPSYGQDGMVQR  | Negative |
| P34096 | SYGQDGMVQRFLRQHVHPEE  | Negative |
| P34096 | LLLLTLGLGLVQPSYGQD    | Negative |
| P34096 | LLGLGLVQPSYGQDGMVQRF  | Negative |
| P34096 | RTHSLLLLLLLLTLLGLGLVQ | Negative |
| P34096 | LLLLLTLLGLGLVQPSYGQ   | Negative |
| P34115 | LICFLQLGQSVIDPSQNEVM  | Negative |
| P34115 | QNEVMSDLLFNLYGYDKSLD  | Negative |
| P34115 | EVMSDLLFNLYGYDKSLDPC  | Negative |
| P34115 | IFLICFLQLGQSVIDPSQNE  | Negative |
| P34115 | ILILSIFLICFLQLGQSVID  | Negative |
| P34115 | VMSDLLFNLYGYDKSLDPCN  | Negative |
| P34115 | IILILSIFLICFLQLGQSVI  | Negative |
| P34115 | LILSIFLICFLQLGQSVIDP  | Negative |
| P34115 | FLQLGQSVIDPSQNEVMSDL  | Negative |
| P34115 | MKIILILSIFLICFLQLGQS  | Negative |
| P34115 | DPSQNEVMSDLLFNLYGYDK  | Negative |
| P34115 | FLICFLQLGQSVIDPSQNEV  | Negative |

|        |                      |          |
|--------|----------------------|----------|
| P34115 | PSQNEVMSDLLFNLYGYDKS | Negative |
| P34115 | LGQSVIDPSQNEVMSDLLFN | Negative |
| P34115 | ICFLQLGQSVIDPSQNEVMS | Negative |
| P34115 | GQSVIDPSQNEVMSDLLFN  | Negative |
| P34115 | CFLQLGQSVIDPSQNEVMSD | Negative |
| P34115 | QSVIDPSQNEVMSDLLFNLY | Negative |
| P34115 | KIILLSIFLICFLQLGQSV  | Negative |
| P34115 | LSIFLICFLQLGQSVIDPSQ | Negative |
| P34115 | LQLGQSVIDPSQNEVMSDLL | Negative |
| P34115 | VIDPSQNEVMSDLLFNLYGY | Negative |
| P34115 | NEVMSDLLFNLYGYDKSLDP | Negative |
| P34115 | QLGQSVIDPSQNEVMSDLLF | Negative |
| P34115 | IDPSQNEVMSDLLFNLYGYD | Negative |
| P34115 | SVIDPSQNEVMSDLLFNLYG | Negative |
| P34115 | SQNEVMSDLLFNLYGYDKSL | Negative |
| P34115 | SIFLICFLQLGQSVIDPSQN | Negative |
| P34115 | MSDLLFNLYGYDKSLDPCNN | Negative |
| P34116 | KIILTLSIFLICFLQLGQSV | Negative |
| P34116 | IDPSQNEVMSDLLFNLYGYD | Negative |
| P34116 | ICFLQLGQSVIDPSQNEVMS | Negative |
| P34116 | MSDLLFNLYGYDKSLDPCNS | Negative |
| P34116 | FLICFLQLGQSVIDPSQNEV | Negative |
| P34116 | VIDPSQNEVMSDLLFNLYGY | Negative |
| P34116 | LSIFLICFLQLGQSVIDPSQ | Negative |
| P34116 | CFLQLGQSVIDPSQNEVMSD | Negative |
| P34116 | IFLICFLQLGQSVIDPSQNE | Negative |
| P34116 | NEVMSDLLFNLYGYDKSLDP | Negative |
| P34116 | GQSVIDPSQNEVMSDLLFN  | Negative |
| P34116 | QNEVMSDLLFNLYGYDKSLD | Negative |
| P34116 | PSQNEVMSDLLFNLYGYDKS | Negative |
| P34116 | SIFLICFLQLGQSVIDPSQN | Negative |
| P34116 | MKIILTLSIFLICFLQLGQS | Negative |
| P34116 | QLGQSVIDPSQNEVMSDLLF | Negative |
| P34116 | DPSQNEVMSDLLFNLYGYDK | Negative |
| P34116 | IILTLSIFLICFLQLGQSVI | Negative |
| P34116 | SVIDPSQNEVMSDLLFNLYG | Negative |
| P34116 | LQLGQSVIDPSQNEVMSDLL | Negative |
| P34116 | SQNEVMSDLLFNLYGYDKSL | Negative |
| P34116 | VMSDLLFNLYGYDKSLDPCN | Negative |
| P34116 | LTLSIFLICFLQLGQSVIDP | Negative |
| P34116 | QSVIDPSQNEVMSDLLFNLY | Negative |
| P34116 | FLQLGQSVIDPSQNEVMSDL | Negative |
| P34116 | EVMSDLLFNLYGYDKSLDPC | Negative |
| P34116 | LGQSVIDPSQNEVMSDLLFN | Negative |
| P34116 | LICFLQLGQSVIDPSQNEVM | Negative |
| P34116 | ILTLSIFLICFLQLGQSVID | Negative |

|        |                       |          |
|--------|-----------------------|----------|
| P34170 | FVASVADSVIGTAEVM SHVT | Negative |
| P34170 | MSHVT AHFGKTLEECREESG | Negative |
| P34170 | GTAEVMSHVT AHFGKTLEEC | Negative |
| P34170 | ASVADSVIGTAEVM SHVTAH | Negative |
| P34170 | SVADSVIGTAEVM SHVTAHF | Negative |
| P34170 | HVTAHFGKTLEECREESGLS  | Negative |
| P34170 | FLILVFVASVADSVIGTAEV  | Negative |
| P34170 | TAHFGKTLEECREESGLSVD  | Negative |
| P34170 | TAEVM SHVTAHFGKTLEECR | Negative |
| P34170 | LILVFVASVADSVIGTAEVM  | Negative |
| P34170 | VIGTAEVM SHVTAHFGKTLE | Negative |
| P34170 | AEVM SHVTAHFGKTLEECRE | Negative |
| P34170 | HFGKTLEECREESGLSVDIL  | Negative |
| P34170 | VFVASVADSVIGTAEVM SHV | Negative |
| P34170 | SHVTAHFGKTLEECREESGL  | Negative |
| P34170 | VT AHFGKTLEECREESGLSV | Negative |
| P34170 | VMSHVTAHFGKTLEECREES  | Negative |
| P34170 | MFSFLILVFVASVADSVIGT  | Negative |
| P34170 | AHFGKTLEECREESGLSVDI  | Negative |
| P34170 | VASVADSVIGTAEVM SHVTA | Negative |
| P34170 | FSFLILVFVASVADSVIGTA  | Negative |
| P34170 | ADSVIGTAEVM SHVTAHFGK | Negative |
| P34170 | SVIGTAEVM SHVTAHFGKTL | Negative |
| P34170 | IGTAEVM SHVTAHFGKTLEE | Negative |
| P34170 | EVMSHVTAHFGKTLEECREE  | Negative |
| P34170 | VADSVIGTAEVM SHVTAHFG | Negative |
| P34170 | LVFVASVADSVIGTAEVM SH | Negative |
| P34170 | SFLILVFVASVADSVIGTAE  | Negative |
| P34170 | DSVIGTAEVM SHVTAHFGKT | Negative |
| P34171 | LQGALTDVYVMKDVTLGFGQ  | Negative |
| P34171 | MWKL VVLT VNLLQGALTDV | Negative |
| P34171 | VLT VNLLQGALTDVYVMKDV | Negative |
| P34171 | TDVYVMKDVTLGFGQALEQC  | Negative |
| P34171 | LTVNLLQGALTDVYVMKDV   | Negative |
| P34171 | DVYVMKDVTLGFGQALEQCR  | Negative |
| P34171 | VYVMKDVTLGFGQALEQCRE  | Negative |
| P34171 | VNLLQGALTDVYVMKDVTLG  | Negative |
| P34171 | TLGFGQALEQCREESQLTEE  | Negative |
| P34171 | MKDVTLGFGQALEQCREESQ  | Negative |
| P34171 | LTDVYVMKDVTLGFGQALEQ  | Negative |
| P34171 | GALTDVYVMKDVTLGFGQAL  | Negative |
| P34171 | NLLQGALTDVYVMKDVTLGF  | Negative |
| P34171 | VVLT VNLLQGALTDVYVMK  | Negative |
| P34171 | VT LGFGQALEQCREESQLTE | Negative |
| P34171 | DVTLGFGQALEQCREESQLT  | Negative |
| P34171 | GFGQALEQCREESQLTEEKM  | Negative |

|        |                       |          |
|--------|-----------------------|----------|
| P34171 | TVNLLQGALTDVYVMKDVTL  | Negative |
| P34171 | LGFGQALEQCREESQLTEEK  | Negative |
| P34171 | VVLTVNLLQGALTDVYVMKD  | Negative |
| P34171 | LLQGALTDVYVMKDVTLGFG  | Negative |
| P34171 | QGALTDVYVMKDVTLGFGQA  | Negative |
| P34171 | ALTDVYVMKDVTLGFGQALE  | Negative |
| P34171 | FGQALEQCREESQLTEEKME  | Negative |
| P34171 | VMKDVTLGFGQALEQCREES  | Negative |
| P34171 | YVMKDVTLGFGQALEQCREE  | Negative |
| P34171 | KLVVVLTVNLLQGALTDVYV  | Negative |
| P34171 | WKLVVVLTVNLLQGALTDVY  | Negative |
| P34171 | KDVTLGFGQALEQCREESQL  | Negative |
| P34174 | GSVDASQEVMMKNLSLNFKA  | Negative |
| P34174 | SVDASQEVMMKNLSLNFKAL  | Negative |
| P34174 | QEVMMKNLSLNFKALDECKK  | Negative |
| P34174 | QGQIALALMVNMAVGSVDAS  | Negative |
| P34174 | LSLNFKGALDECKKEMTLTD  | Negative |
| P34174 | MSIQGQIALALMVNMAVGSV  | Negative |
| P34174 | GQIALALMVNMAVGSVDASQ  | Negative |
| P34174 | MVNMAVGSVDASQEVMMKNLS | Negative |
| P34174 | ASQEVMMKNLSLNFKGALDEC | Negative |
| P34174 | MAVGSVDASQEVMMKNLSLNF | Negative |
| P34174 | LMVNMAVGSVDASQEVMMKNL | Negative |
| P34174 | VMKNLSLNFKGALDECKKEM  | Negative |
| P34174 | NMAVGSVDASQEVMMKNLSL  | Negative |
| P34174 | NLSLNFKGALDECKKEMTLT  | Negative |
| P34174 | SIQGQIALALMVNMAVGSVD  | Negative |
| P34174 | EVMMKNLSLNFKGALDECKKE | Negative |
| P34174 | VGSVDASQEVMMKNLSLNFKG | Negative |
| P34174 | DASQEVMMKNLSLNFKGALDE | Negative |
| P34174 | QIALALMVNMAVGSVDASQE  | Negative |
| P34174 | VNMAVGSVDASQEVMMKNLSL | Negative |
| P34174 | SQEVMMKNLSLNFKGALDECK | Negative |
| P34174 | ALMVNMAVGSVDASQEVMMKN | Negative |
| P34174 | VDASQEVMMKNLSLNFKGALD | Negative |
| P34174 | KNLSLNFKGALDECKKEMTL  | Negative |
| P34174 | AVGSVDASQEVMMKNLSLNF  | Negative |
| P34174 | LALMVNMAVGSVDASQEVMMK | Negative |
| P34174 | IALALMVNMAVGSVDASQEV  | Negative |
| P34174 | MKNLSLNFKGALDECKKEMT  | Negative |
| P34174 | IQGQIALALMVNMAVGSVDA  | Negative |
| P34207 | VSNLLLWENMASKPTVLVST  | Negative |
| P34207 | QLLLLVSNNLLWENMASKPT  | Negative |
| P34207 | LLLVSNNLLWENMASKPTVL  | Negative |
| P34207 | NMASKPTVLVSTEDLYHRLV  | Negative |
| P34207 | LLWENMASKPTVLVSTEDLY  | Negative |

|        |                        |          |
|--------|------------------------|----------|
| P34207 | LVSNNLLWENMASKPTVLVS   | Negative |
| P34207 | ASKPTVLVSTEDLYHRLVEQ   | Negative |
| P34207 | LTLSGSSMQLLLLVSNNLLW   | Negative |
| P34207 | NLLLWENMASKPTVLVSTED   | Negative |
| P34207 | MQLLLLVSNNLLWENMASKP   | Negative |
| P34207 | LSGSSMQLLLLVSNNLLWEN   | Negative |
| P34207 | SKPTVLVSTEDLYHRLVEQS   | Negative |
| P34207 | WENMASKPTVLVSTEDLYHR   | Negative |
| P34207 | QLTLTLSGSSMQLLLLVSNNL  | Negative |
| P34207 | SSMQLLLLVSNNLLWENMAS   | Negative |
| P34207 | MASKPTVLVSTEDLYHRLVE   | Negative |
| P34207 | MQTLTLTLSGSSMQLLLLVSNN | Negative |
| P34207 | SMQLLLLVSNNLLWENMASK   | Negative |
| P34207 | SGSSMQLLLLVSNNLLWENM   | Negative |
| P34207 | LLVSNNLLWENMASKPTVLV   | Negative |
| P34207 | KPTVLVSTEDLYHRLVEQSH   | Negative |
| P34207 | TLSGSSMQLLLLVSNNLLWE   | Negative |
| P34207 | SNLLWENMASKPTVLVSTE    | Negative |
| P34207 | LLLWENMASKPTVLVSTEDL   | Negative |
| P34207 | GSSMQLLLLVSNNLLWENMA   | Negative |
| P34207 | ENMASKPTVLVSTEDLYHRL   | Negative |
| P34207 | LWENMASKPTVLVSTEDLYH   | Negative |
| P34207 | LTLTLSGSSMQLLLLVSNNLL  | Negative |
| P34207 | TLTLSGSSMQLLLLVSNNLL   | Negative |
| P34210 | GPEKISTEINLGTLSGKTKE   | Negative |
| P34210 | KLLAIMLAAPVVFSSQEASA   | Negative |
| P34210 | IMLAAPVVFSSQEASASDFF   | Negative |
| P34210 | QTKLLAIMLAAPVVFSSQEA   | Negative |
| P34210 | TKLLAIMLAAPVVFSSQEAS   | Negative |
| P34210 | LAAPVVFSSQEASASDFFGP   | Negative |
| P34210 | VFSSQEASASDFFGPEKIST   | Negative |
| P34210 | ASDFFGPEKISTEINLGTLS   | Negative |
| P34210 | EKISTEINLGTLSGKTKERV   | Negative |
| P34210 | AAPVVFSSQEASASDFFGPE   | Negative |
| P34210 | QEASASDFFGPEKISTEINL   | Negative |
| P34210 | DDFGPEKISTEINLGTLSGK   | Negative |
| P34210 | VVFSSQEASASDFFGPEKIS   | Negative |
| P34210 | FSSQEASASDFFGPEKISTE   | Negative |
| P34210 | MQTKLLAIMLAAPVVFSSQE   | Negative |
| P34210 | ASASDFFGPEKISTEINLGT   | Negative |
| P34210 | LLAIMLAAPVVFSSQEASAS   | Negative |
| P34210 | SQEASASDFFGPEKISTEIN   | Negative |
| P34210 | EASASDFFGPEKISTEINLG   | Negative |
| P34210 | APVVFSSQEASASDFFGPEK   | Negative |
| P34210 | SSQEASASDFFGPEKISTEI   | Negative |
| P34210 | PEKISTEINLGTLSGKTKER   | Negative |

|        |                       |          |
|--------|-----------------------|----------|
| P34210 | FGPEKISTEINLGTLGKTK   | Negative |
| P34210 | PVVFSSEQEASASDFFGPEKI | Negative |
| P34210 | SDDFGPEKISTEINLGTLG   | Negative |
| P34210 | LAIMLAAPVVFSSEQEASASD | Negative |
| P34210 | AIMLAAPVVFSSEQEASASDF | Negative |
| P34210 | FFGPEKISTEINLGTLGKT   | Negative |
| P34210 | SASDFFGPEKISTEINLGT   | Negative |
| P34745 | VASLLFSQGATFESQRLFNN  | Negative |
| P34745 | SLLFSQGATFESQRLFNNAV  | Negative |
| P34745 | LVLLSVVVASLLFSQGATFE  | Negative |
| P34745 | LFSQGATFESQRLFNNAVIR  | Negative |
| P34745 | SQRLFNNAVIRVQHLHQLAA  | Negative |
| P34745 | RLFNNAVIRVQHLHQLAAKM  | Negative |
| P34745 | LLFSQGATFESQRLFNNAVI  | Negative |
| P34745 | FSQGATFESQRLFNNAVIRV  | Negative |
| P34745 | MARVLVLLSVVVASLLFSQG  | Negative |
| P34745 | FESQRLFNNAVIRVQHLHQL  | Negative |
| P34745 | ARVLVLLSVVVASLLFSQGA  | Negative |
| P34745 | TFESQRLFNNAVIRVQHLHQ  | Negative |
| P34745 | RVLVLLSVVVASLLFSQGAT  | Negative |
| P34745 | VVVASLLFSQGATFESQRLF  | Negative |
| P34745 | FNNAVIRVQHLHQLAAKMMD  | Negative |
| P34745 | LFNNAVIRVQHLHQLAAKMM  | Negative |
| P34745 | VLLSVVVASLLFSQGATFES  | Negative |
| P34745 | QGATFESQRLFNNAVIRVQH  | Negative |
| P34745 | LLSVVVASLLFSQGATFESQ  | Negative |
| P34745 | ASLLFSQGATFESQRLFNNA  | Negative |
| P34745 | GATFESQRLFNNAVIRVQHL  | Negative |
| P34745 | SVVVASLLFSQGATFESQRL  | Negative |
| P34745 | NNAVIRVQHLHQLAAKMMDD  | Negative |
| P34745 | ATFESQRLFNNAVIRVQHLH  | Negative |
| P34745 | ESQRLFNNAVIRVQHLHQLA  | Negative |
| P34745 | VLVLLSVVVASLLFSQGATF  | Negative |
| P34745 | VVASLLFSQGATFESQRLFN  | Negative |
| P34745 | QRLFNNAVIRVQHLHQLAAK  | Negative |
| P34745 | SQGATFESQRLFNNAVIRVQ  | Negative |
| P34746 | GVSSQQITDSQRLFSIAVNR  | Negative |
| P34746 | QQITDSQRLFSIAVNRVTHL  | Negative |
| P34746 | QRLFSIAVNRVTHLYLLAQR  | Negative |
| P34746 | VVCLGVSSQQITDSQRLFSI  | Negative |
| P34746 | MNSVVLQLSVVCLGVSSQQI  | Negative |
| P34746 | VVLQLSVVCLGVSSQQITDS  | Negative |
| P34746 | NSVVLQLSVVCLGVSSQQIT  | Negative |
| P34746 | SVVCLGVSSQQITDSQRLFS  | Negative |
| P34746 | VSSQQITDSQRLFSIAVNRV  | Negative |
| P34746 | QITDSQRLFSIAVNRVTHLY  | Negative |



|        |                       |          |
|--------|-----------------------|----------|
| P34746 | RLFSIAVNRVTHLYLLAQRL  | Negative |
| P34746 | VCLGVSSQQITDSQRLFSIA  | Negative |
| P34746 | AVNRVTHLYLLAQRLFSDFE  | Negative |
| P34746 | SIAVNRVTHLYLLAQRLFSD  | Negative |
| P34746 | LFSIAVNRVTHLYLLAQRLF  | Negative |
| P34746 | CLGVSSQQITDSQRLFSIAV  | Negative |
| P34746 | LSVVCLGVSSQQITDSQRLF  | Negative |
| P34746 | LQLSVVCLGVSSQQITDSQR  | Negative |
| P34746 | FSIAVNRVTHLYLLAQRLFS  | Negative |
| P34746 | SQQITDSQRLFSIAVNRVTH  | Negative |
| P34746 | SQRLFSIAVNRVTHLYLLAQ  | Negative |
| P34746 | IAVNRVTHLYLLAQRLFSDF  | Negative |
| P34746 | LGVSSQQITDSQRLFSIAVN  | Negative |
| P34746 | TDSQRLFSIAVNRVTHLYLL  | Negative |
| P34746 | DSQRLFSIAVNRVTHLYLLA  | Negative |
| P34746 | ITDSQRLFSIAVNRVTHLYL  | Negative |
| P34746 | SSQQITDSQRLFSIAVNRVT  | Negative |
| P34746 | QLSVVCLGVSSQQITDSQRL  | Negative |
| P34746 | VLQLSVVCLGVSSQQITDSQ  | Negative |
| P34752 | ASRNQSSCDTVDQGYQCFSE  | Negative |
| P34752 | QSSCDTVDQGYQCFSETSHL  | Negative |
| P34752 | YLLSGVTSGLAVPASRNQSS  | Negative |
| P34752 | VLLPLYLLSGVTSGLAVPAS  | Negative |
| P34752 | AVLLPLYLLSGVTSGLAVPA  | Negative |
| P34752 | SGLAVPASRNQSSCDTVDQG  | Negative |
| P34752 | LPLYLLSGVTSGLAVPASRN  | Negative |
| P34752 | MGVSAVLLPLYLLSGVTSGL  | Negative |
| P34752 | SRNQSSCDTVDQGYQCFSET  | Negative |
| P34752 | NQSSCDTVDQGYQCFSETSH  | Negative |
| P34752 | GVTSGLAVPASRNQSSCDTV  | Negative |
| P34752 | SSCDTVDQGYQCFSETSHLW  | Negative |
| P34752 | LSGVTSGLAVPASRNQSSCD  | Negative |
| P34752 | GLAVPASRNQSSCDTVDQGY  | Negative |
| P34752 | AVPASRNQSSCDTVDQGYQC  | Negative |
| P34752 | SAVLLPLYLLSGVTSGLAVP  | Negative |
| P34752 | LLPLYLLSGVTSGLAVPASR  | Negative |
| P34752 | VPASRNQSSCDTVDQGYQCF  | Negative |
| P34752 | GVS AVLLPLYLLSGVTSGLA | Negative |
| P34752 | VTSGLAVPASRNQSSCDTVD  | Negative |
| P34752 | PASRNQSSCDTVDQGYQCFS  | Negative |
| P34752 | LLSGVTSGLAVPASRNQSSC  | Negative |
| P34752 | TSGLAVPASRNQSSCDTVDQ  | Negative |
| P34752 | LAVPASRNQSSCDTVDQGYQ  | Negative |
| P34752 | SGVTSGLAVPASRNQSSCDT  | Negative |
| P34752 | RNQSSCDTVDQGYQCFSETS  | Negative |
| P34752 | LYLLSGVTSGLAVPASRNQS  | Negative |

|        |                       |          |
|--------|-----------------------|----------|
| P34752 | VSAVLLPLYLLSGVTSGLAV  | Negative |
| P34752 | SCDTVDDQGYQCFSETSHLWG | Negative |
| P34754 | IPQSTQEKQFSQEFRDGYSI  | Negative |
| P34754 | PRTSLLTLACALATGASAFS  | Negative |
| P34754 | PQSTQEKQFSQEFRDGYSIL  | Negative |
| P34754 | ASAFSYGAAIPQSTQEKQFS  | Negative |
| P34754 | AFSYGAAIPQSTQEKQFSQE  | Negative |
| P34754 | CALATGASAFSYGAAIPQST  | Negative |
| P34754 | AAIPQSTQEKQFSQEFRDGY  | Negative |
| P34754 | YGAAIPQSTQEKQFSQEFRD  | Negative |
| P34754 | TLACALATGASAFSYGAAIP  | Negative |
| P34754 | ATGASAFSYGAAIPQSTQEK  | Negative |
| P34754 | QSTQEKQFSQEFRDGYSILK  | Negative |
| P34754 | ALATGASAFSYGAAIPQSTQ  | Negative |
| P34754 | LATGASAFSYGAAIPQSTQE  | Negative |
| P34754 | ACALATGASAFSYGAAIPQS  | Negative |
| P34754 | GASAFSYGAAIPQSTQEKQF  | Negative |
| P34754 | AIPQSTQEKQFSQEFRDGYS  | Negative |
| P34754 | FSYGAAIPQSTQEKQFSQEF  | Negative |
| P34754 | STQEKQFSQEFRDGYSILKH  | Negative |
| P34754 | GAAIPQSTQEKQFSQEFRDG  | Negative |
| P34754 | LTLACALATGASAFSYGAAI  | Negative |
| P34754 | TSLTTLACALATGASAFSYG  | Negative |
| P34754 | SAFSYGAAIPQSTQEKQFSQ  | Negative |
| P34754 | MPRTSLLTLACALATGASAF  | Negative |
| P34754 | SYGAAIPQSTQEKQFSQEFR  | Negative |
| P34754 | TQEKQFSQEFRDGYSILKHY  | Negative |
| P34754 | RTSLLTLACALATGASAFSY  | Negative |
| P34754 | LLTLACALATGASAFSYGAA  | Negative |
| P34754 | LACALATGASAFSYGAAIPQ  | Negative |
| P34754 | TGASAFSYGAAIPQSTQEKQ  | Negative |
| P34951 | TSIYTCYEGMGLPVNPLQGC  | Negative |
| P34951 | ASCSQHLLSAVAIFSVLAGV  | Negative |
| P34951 | FSVLAVATATSIYTCYEGM   | Negative |
| P34951 | SIYTCYEGMGLPVNPLQGCR  | Negative |
| P34951 | SCSQHLLSAVAIFSVLAGVA  | Negative |
| P34951 | SQHLLSAVAIFSVLAGVATA  | Negative |
| P34951 | ATATSIYTCYEGMGLPVNPL  | Negative |
| P34951 | IYTCYEGMGLPVNPLQGCRF  | Negative |
| P34951 | TATSIYTCYEGMGLPVNPLQ  | Negative |
| P34951 | CYEGMGLPVNPLQGCRFYVA  | Negative |
| P34951 | IFSVLAGVATATSIYTCYEG  | Negative |
| P34951 | AVAIFSVLAVATATSIYTC   | Negative |
| P34951 | ATSIYTCYEGMGLPVNPLQG  | Negative |
| P34951 | SVLAGVATATSIYTCYEGMG  | Negative |
| P34951 | LLSAVAIFSVLAGVATATSI  | Negative |

|        |                      |          |
|--------|----------------------|----------|
| P34951 | YTCYEGMGLPVNPLQGCRFY | Negative |
| P34951 | TCYEGMGLPVNPLQGCRFYV | Negative |
| P34951 | CSQHLLSAVAIFSVLAGVAT | Negative |
| P34951 | AGVATATSIYTCYEGMGLPV | Negative |
| P34951 | VATATSIYTCYEGMGLPVNP | Negative |
| P34951 | VAIFSVLAGVATATSIYTCY | Negative |
| P34951 | QHLLSAVAIFSVLAGVATAT | Negative |
| P34951 | MASCSQHLLSAVAIFSVLAG | Negative |
| P34951 | LAGVATATSIYTCYEGMGLP | Negative |
| P34951 | HLLSAVAIFSVLAGVATATS | Negative |
| P34951 | AIFSVLAGVATATSIYTCYE | Negative |
| P34951 | VLAGVATATSIYTCYEGMGL | Negative |
| P34951 | LSAVAIFSVLAGVATATSIY | Negative |
| P34951 | GVATATSIYTCYEGMGLPVN | Negative |
| P35052 | MELRARGWWLLCAAAALVAC | Negative |
| P35052 | LCAAAALVACARGDPASKSR | Negative |
| P35052 | LRARGWWLLCAAAALVACAR | Negative |
| P35052 | VACARGDPASKSRSCGEVRQ | Negative |
| P35052 | AALVACARGDPASKSRSCGE | Negative |
| P35052 | WWLLCAAAALVACARGDPAS | Negative |
| P35052 | SRSCGEVRQIYGAKGFSLS  | Negative |
| P35052 | RARGWWLLCAAAALVACARG | Negative |
| P35052 | GDPASKSRSCGEVRQIYGAK | Negative |
| P35052 | RSCGEVRQIYGAKGFSLS   | Negative |
| P35052 | ELRARGWWLLCAAAALVACA | Negative |
| P35052 | LLCAAAALVACARGDPASKS | Negative |
| P35052 | DPASKSRSCGEVRQIYGAKG | Negative |
| P35052 | ARGDPASKSRSCGEVRQIYG | Negative |
| P35052 | CAAAALVACARGDPASKSRS | Negative |
| P35052 | CARGDPASKSRSCGEVRQIY | Negative |
| P35052 | GWLLCAAAALVACARGDPA  | Negative |
| P35052 | ALVACARGDPASKSRSCGEV | Negative |
| P35052 | ASKSRSCGEVRQIYGAKGFS | Negative |
| P35052 | KSRSCGEVRQIYGAKGFSLS | Negative |
| P35052 | LVACARGDPASKSRSCGEVR | Negative |
| P35052 | ARGWWLLCAAAALVACARGD | Negative |
| P35052 | AAALVACARGDPASKSRSC  | Negative |
| P35052 | RGWWLLCAAAALVACARGDP | Negative |
| P35052 | ACARGDPASKSRSCGEVRQI | Negative |
| P35052 | SKSRSCGEVRQIYGAKGFS  | Negative |
| P35052 | RGDPASKSRSCGEVRQIYGA | Negative |
| P35052 | PASKSRSCGEVRQIYGAKGF | Negative |
| P35052 | AAALVACARGDPASKSRSCG | Negative |
| P35053 | RGWWLLCAAAALVACTRGDP | Negative |
| P35053 | ALVACTRGDPASKSRSCSEV | Negative |
| P35053 | RSCSEVRQIYGAKGFSLS   | Negative |

|        |                        |          |
|--------|------------------------|----------|
| P35053 | AALVACTRGDPASKSRSCSE   | Negative |
| P35053 | WWLLCAAAALVACTRGDPAS   | Negative |
| P35053 | ACTRGDPASKSRSCSEVRQI   | Negative |
| P35053 | CAAAALVACTRGDPASKSR    | Negative |
| P35053 | DPASKSRSCSEVRQIYGAKG   | Negative |
| P35053 | ARGWWLLCAAAALVACTRGD   | Negative |
| P35053 | ASKSRSCSEVRQIYGAKGFS   | Negative |
| P35053 | AAALVACTRGDPASKSRSCS   | Negative |
| P35053 | AAAALVACTRGDPASKSRSC   | Negative |
| P35053 | MELRARGWWLLCAAAALVAC   | Negative |
| P35053 | TRGDPASKSRSCSEVRQIYG   | Negative |
| P35053 | SKSRSCSEVRQIYGAKGFSL   | Negative |
| P35053 | GDPASKSRSCSEVRQIYGAK   | Negative |
| P35053 | VACTRGDPASKSRSCSEVRQ   | Negative |
| P35053 | ELRARGWWLLCAAAALVACT   | Negative |
| P35053 | KSRSCSEVRQIYGAKGFSLS   | Negative |
| P35053 | RARGWWLLCAAAALVACTRG   | Negative |
| P35053 | SRSCSEVRQIYGAKGFSLSLSD | Negative |
| P35053 | CTRGDPASKSRSCSEVRQIY   | Negative |
| P35053 | LCAAAALVACTRGDPASKSR   | Negative |
| P35053 | GWLLCAAAALVACTRGDPA    | Negative |
| P35053 | LVACTRGDPASKSRSCSEVR   | Negative |
| P35053 | LRARGWWLLCAAAALVACTR   | Negative |
| P35053 | PASKSRSCSEVRQIYGAKGF   | Negative |
| P35053 | LLCAAAALVACTRGDPASKS   | Negative |
| P35053 | RGDPASKSRSCSEVRQIYGA   | Negative |
| P35150 | KAVFVIMISFLIATVNVNTA   | Negative |
| P35150 | ATVNVNTAHAAIDVSAKSAI   | Negative |
| P35150 | FLIATVNVNTAHAAIDVSAK   | Negative |
| P35150 | VNVNTAHAAIDVSAKSIII    | Negative |
| P35150 | AHAAIDVSAKSIIIDGASG    | Negative |
| P35150 | KKAVFVIMISFLIATVNVNT   | Negative |
| P35150 | MISFLIATVNVNTAHAAIDV   | Negative |
| P35150 | VFVIMISFLIATVNVNTAHA   | Negative |
| P35150 | IFKKAVFVIMISFLIATVNV   | Negative |
| P35150 | AAIDVSAKSIIIDGASGRV    | Negative |
| P35150 | IDVSAKSIIIDGASGRVLY    | Negative |
| P35150 | DVSAKSIIIDGASGRVLYA    | Negative |
| P35150 | MRIFKKAVFVIMISFLIATV   | Negative |
| P35150 | RIFKKAVFVIMISFLIATVN   | Negative |
| P35150 | FKKAVFVIMISFLIATVNVN   | Negative |
| P35150 | NVNTAHAAIDVSAKSIIID    | Negative |
| P35150 | VNTAHAAIDVSAKSIIIDG    | Negative |
| P35150 | AVFVIMISFLIATVNVNTAH   | Negative |
| P35150 | TAHAAIDVSAKSIIIDGAS    | Negative |
| P35150 | FVIMISFLIATVNVNTAHAA   | Negative |

|        |                      |          |
|--------|----------------------|----------|
| P35150 | NTAHAAIDVSAKSAIIDGA  | Negative |
| P35150 | HAAIDVSAKSAIIDGASGR  | Negative |
| P35150 | VIMISFLIATVNVNTAHAAI | Negative |
| P35150 | AIDVSAKSAIIDGASGRVL  | Negative |
| P35150 | TVNVNTAHAAIDVSAKSAI  | Negative |
| P35150 | LIATVNVNTAHAAIDVSAKS | Negative |
| P35150 | IMISFLIATVNVNTAHAAID | Negative |
| P35150 | IATVNVNTAHAAIDVSAKSA | Negative |
| P35150 | SFLIATVNVNTAHAAIDVSA | Negative |
| P35248 | FLSMLVLLVQPLGDLGAEMK | Negative |
| P35248 | LVQPLGDLGAEMKTLQRSI  | Negative |
| P35248 | LSQRSITNTCTLVLCSPTE  | Negative |
| P35248 | GDLGAEMKTLQRSITNTCT  | Negative |
| P35248 | EMKTLQRSITNTCTLVLC   | Negative |
| P35248 | QRSITNTCTLVLCSPTE    | Negative |
| P35248 | HFLSMLVLLVQPLGDLGAEM | Negative |
| P35248 | QPLGDLGAEMKTLQRSITN  | Negative |
| P35248 | TLQRSITNTCTLVLCSPTE  | Negative |
| P35248 | SMLVLLVQPLGDLGAEMKTL | Negative |
| P35248 | LVLLVQPLGDLGAEMKTL   | Negative |
| P35248 | SITNTCTLVLCSPTE      | Negative |
| P35248 | DLGAEMKTLQRSITNTCTL  | Negative |
| P35248 | GAEMKTLQRSITNTCTLVL  | Negative |
| P35248 | LHFLSMLVLLVQPLGDLGAE | Negative |
| P35248 | LGAEMKTLQRSITNTCTLV  | Negative |
| P35248 | MLVLLVQPLGDLGAEMKTL  | Negative |
| P35248 | LLVQPLGDLGAEMKTLQRS  | Negative |
| P35248 | RSITNTCTLVLCSPTE     | Negative |
| P35248 | VQPLGDLGAEMKTLQRSIT  | Negative |
| P35248 | KTLQRSITNTCTLVLCSP   | Negative |
| P35248 | MLHFLSMLVLLVQPLGDLGA | Negative |
| P35248 | SQRSITNTCTLVLCSPTE   | Negative |
| P35248 | VLLVQPLGDLGAEMKTLQR  | Negative |
| P35248 | LGDLGAEMKTLQRSITNTC  | Negative |
| P35248 | PLGDLGAEMKTLQRSITNT  | Negative |
| P35248 | AEMKTLQRSITNTCTLVLC  | Negative |
| P35248 | MKTLQRSITNTCTLVLCSP  | Negative |
| P35248 | ITNTCTLVLCSPTE       | Negative |
| P35355 | NRGECMSIGFDQYKCDCTR  | Negative |
| P35355 | HAANPCCSNPCQNRGECMS  | Negative |
| P35355 | AALALSHAANPCCSNPCQNR | Negative |
| P35355 | AANPCCSNPCQNRGECMSIG | Negative |
| P35355 | LFRAVLLCAALALSHAANPC | Negative |
| P35355 | VLLCAALALSHAANPCCSNP | Negative |
| P35355 | LSHAANPCCSNPCQNRGECM | Negative |
| P35355 | RGECMSIGFDQYKCDCTR   | Negative |

|        |                       |          |
|--------|-----------------------|----------|
| P35355 | PCQNRGECMSIGFDQYKCDC  | Negative |
| P35355 | CSNPCQNRGECMSIGFDQYK  | Negative |
| P35355 | NPCQNRGECMSIGFDQYKCD  | Negative |
| P35355 | SHAANPCCSNPCQNRGECMS  | Negative |
| P35355 | SNPCQNRGECMSIGFDQYKC  | Negative |
| P35355 | QNRGECMSIGFDQYKCDCTR  | Negative |
| P35355 | NPCCSNPCQNRGECMSIGFD  | Negative |
| P35355 | CAALALSHAANPCCSNPCQN  | Negative |
| P35355 | ALSHAANPCCSNPCQNRGEC  | Negative |
| P35355 | GECMSIGFDQYKCDCTRTRTF | Negative |
| P35355 | ALALSHAANPCCSNPCQNRG  | Negative |
| P35355 | CCSNPCQNRGECMSIGFDQY  | Negative |
| P35355 | PCCSNPCQNRGECMSIGFDQ  | Negative |
| P35355 | CQNRGECMSIGFDQYKCDCT  | Negative |
| P35355 | RAVLLCAALALSHAANPCCS  | Negative |
| P35355 | LLCAALALSHAANPCCSNPC  | Negative |
| P35355 | LALSHAANPCCSNPCQNRGE  | Negative |
| P35355 | LCAALALSHAANPCCSNPCQ  | Negative |
| P35355 | AVLLCAALALSHAANPCCSN  | Negative |
| P35355 | MLFRAVLLCAALALSHAANP  | Negative |
| P35355 | ANPCCSNPCQNRGECMSIGF  | Negative |
| P35441 | VLFLHMCNRIIPESGGDN    | Negative |
| P35441 | LFLHMCNRIIPESGGDNG    | Negative |
| P35441 | MCGSNRIIPESGGDNGVFDIF | Negative |
| P35441 | RGLGVFLHMCNRIIPES     | Negative |
| P35441 | NRIPESGGDNGVFDIFELIG  | Negative |
| P35441 | ESGGDNGVFDIFELIGGARR  | Negative |
| P35441 | RIPESGGDNGVFDIFELIGG  | Negative |
| P35441 | FLLHMCNRIIPESGGDNGV   | Negative |
| P35441 | IPESGGDNGVFDIFELIGGA  | Negative |
| P35441 | MELLRGLGVFLHMCNRI     | Negative |
| P35441 | GSNRIIPESGGDNGVFDIFEL | Negative |
| P35441 | LLRGLGVFLHMCNRIIP     | Negative |
| P35441 | PESGGDNGVFDIFELIGGAR  | Negative |
| P35441 | CGSNRIIPESGGDNGVFDIFE | Negative |
| P35441 | HMCNRIIPESGGDNGVFDI   | Negative |
| P35441 | LGVFLHMCNRIIPESGG     | Negative |
| P35441 | SGGDNGVFDIFELIGGARRG  | Negative |
| P35441 | SNRIIPESGGDNGVFDIFELI | Negative |
| P35441 | VFDIFELIGGARRGPGRRLV  | Negative |
| P35441 | ELLRGLGVFLHMCNRI      | Negative |
| P35441 | GVFDIFELIGGARRGPGRRL  | Negative |
| P35441 | GGDNGVFDIFELIGGARRGP  | Negative |
| P35441 | NGVFDIFELIGGARRGPGRR  | Negative |
| P35441 | LLHMCNRIIPESGGDNGVF   | Negative |
| P35441 | DNGVFDIFELIGGARRGPGR  | Negative |

|        |                      |          |
|--------|----------------------|----------|
| P35441 | GVLFLMHMCGRNIPESGGD  | Negative |
| P35441 | GLGVFLFLMHMCGRNIPESG | Negative |
| P35441 | LHMCGRNIPESGGDNGVFD  | Negative |
| P35441 | GDNGVFDIFELIGGARRGPG | Negative |
| P35481 | VIVLFLAVTLVVESTGIPGG | Negative |
| P35481 | VDADINDKDVQKALRFAVDH | Negative |
| P35481 | ESTGIPGGLVDADINDKDVQ | Negative |
| P35481 | LVVESTGIPGGLVDADINDK | Negative |
| P35481 | VESTGIPGGLVDADINDKDV | Negative |
| P35481 | INDKDVQKALRFAVDHYNGQ | Negative |
| P35481 | TLVVESTGIPGGLVDADIND | Negative |
| P35481 | VLFLAVTLVVESTGIPGGLV | Negative |
| P35481 | DADINDKDVQKALRFAVDHY | Negative |
| P35481 | VTLVVESTGIPGGLVDADIN | Negative |
| P35481 | LVDADINDKDVQKALRFAVD | Negative |
| P35481 | STGIPGGLVDADINDKDVQK | Negative |
| P35481 | LAVTLVVESTGIPGGLVDAD | Negative |
| P35481 | MYLKVIVLFLAVTLVVESTG | Negative |
| P35481 | GIPGGLVDADINDKDVQKAL | Negative |
| P35481 | FLAVTLVVESTGIPGGLVDA | Negative |
| P35481 | YLKVIVLFLAVTLVVESTGI | Negative |
| P35481 | VVESTGIPGGLVDADINDKD | Negative |
| P35481 | GLVDADINDKDVQKALRFAV | Negative |
| P35481 | GGLVDADINDKDVQKALRFA | Negative |
| P35481 | LFLAVTLVVESTGIPGGLVD | Negative |
| P35481 | DINDKDVQKALRFAVDHYNG | Negative |
| P35481 | AVTLVVESTGIPGGLVDADI | Negative |
| P35481 | PGGLVDADINDKDVQKALRF | Negative |
| P35481 | IPGGLVDADINDKDVQKALR | Negative |
| P35481 | IVLFLAVTLVVESTGIPGGL | Negative |
| P35481 | TGIPGGLVDADINDKDVQKA | Negative |
| P35481 | LKVIVLFLAVTLVVESTGIP | Negative |
| P35481 | ADINDKDVQKALRFAVDHYN | Negative |
| P35482 | LSVAALVSAQAMAVTGGGAS | Negative |
| P35482 | QAMAVTGGGASLPAELYKGS | Negative |
| P35482 | VSAQAMAVTGGGASLPAELY | Negative |
| P35482 | AASLSVAALVSAQAMAVTGG | Negative |
| P35482 | SLPAELYKGSADSILPANFS | Negative |
| P35482 | LIAASLSVAALVSAQAMAVT | Negative |
| P35482 | SLIAASLSVAALVSAQAMAV | Negative |
| P35482 | IAASLSVAALVSAQAMAVTG | Negative |
| P35482 | SVAALVSAQAMAVTGGGASL | Negative |
| P35482 | AVTGGGASLPAELYKGSADS | Negative |
| P35482 | MFKRSLIAASLSVAALVSAQ | Negative |
| P35482 | GGASLPAELYKGSADSILPA | Negative |
| P35482 | GGGASLPAELYKGSADSILP | Negative |

|        |                      |          |
|--------|----------------------|----------|
| P35482 | GASLPAELYKGSADSILPAN | Negative |
| P35482 | SAQAMAVTGGGASLPAELYK | Negative |
| P35482 | RSLIAASLSVAALVSAQAMA | Negative |
| P35482 | AQAMAVTGGGASLPAELYKG | Negative |
| P35482 | FKRSLIAASLSVAALVSAQA | Negative |
| P35482 | KRSLIAASLSVAALVSAQAM | Negative |
| P35482 | ASLPAELYKGSADSILPANF | Negative |
| P35482 | VTGGGASLPAELYKGSADSI | Negative |
| P35482 | MAVTGGGASLPAELYKGSAD | Negative |
| P35482 | ALVSAQAMAVTGGGASLPAE | Negative |
| P35482 | AALVSAQAMAVTGGGASLPA | Negative |
| P35482 | TGGGASLPAELYKGSADSIL | Negative |
| P35482 | LVSAQAMAVTGGGASLPAEL | Negative |
| P35482 | SLSVAALVSAQAMAVTGGGA | Negative |
| P35482 | VAALVSAQAMAVTGGGASLP | Negative |
| P35482 | AMAVTGGGASLPAELYKGSA | Negative |
| P35483 | ALSLAVSMAVLGSALPAQAR | Negative |
| P35483 | SALPAQARQDDPSLFNRQAR | Negative |
| P35483 | PGYPLALSLAVSMAVLGSAL | Negative |
| P35483 | LGSALPAQARQDDPSLFNRQ | Negative |
| P35483 | DDPSLFNRQARGELSEYGGA | Negative |
| P35483 | LAVSMAVLGSALPAQARQDD | Negative |
| P35483 | YPLALSLAVSMAVLGSALPA | Negative |
| P35483 | MTPGYPLALSLAVSMAVLGS | Negative |
| P35483 | GYPLALSLAVSMAVLGSALP | Negative |
| P35483 | TPGYPLALSLAVSMAVLGSA | Negative |
| P35483 | SLAVSMAVLGSALPAQARQD | Negative |
| P35483 | MAVLGSALPAQARQDDPSLF | Negative |
| P35483 | QDDPSLFNRQARGELSEYGG | Negative |
| P35483 | RQDDPSLFNRQARGELSEYG | Negative |
| P35483 | GSALPAQARQDDPSLFNRQA | Negative |
| P35483 | PAQARQDDPSLFNRQARGEL | Negative |
| P35483 | VLGSALPAQARQDDPSLFNR | Negative |
| P35483 | LALSLAVSMAVLGSALPAQA | Negative |
| P35483 | ALPAQARQDDPSLFNRQARG | Negative |
| P35483 | LPAQARQDDPSLFNRQARGE | Negative |
| P35483 | AVLGSALPAQARQDDPSLFN | Negative |
| P35483 | SMAVLGSALPAQARQDDPSL | Negative |
| P35483 | ARQDDPSLFNRQARGELSEY | Negative |
| P35483 | LSLAVSMAVLGSALPAQARQ | Negative |
| P35483 | QARQDDPSLFNRQARGELSE | Negative |
| P35483 | DPSLFNRQARGELSEYGGAR | Negative |
| P35483 | PLALSLAVSMAVLGSALPAQ | Negative |
| P35483 | VMAVLGSALPAQARQDDPS  | Negative |
| P35483 | AQARQDDPSLFNRQARGELS | Negative |
| P35495 | WALLFSTATLISTGWGLDYH | Negative |



|        |                       |          |
|--------|-----------------------|----------|
| P35495 | STATLISTGWGLDYHACGGR  | Negative |
| P35495 | GLDYHACGGRLTDDYGIFT   | Negative |
| P35495 | MKLGSAIPWALLFSTATLIS  | Negative |
| P35495 | LFSTATLISTGWGLDYHACG  | Negative |
| P35495 | AIPWALLFSTATLISTGWGL  | Negative |
| P35495 | CGGRLTDDYGIFTYKGPKT   | Negative |
| P35495 | STGWGLDYHACGGRLTDDYG  | Negative |
| P35495 | ATLISTGWGLDYHACGGRLT  | Negative |
| P35495 | TATLISTGWGLDYHACGGRL  | Negative |
| P35495 | LDYHACGGRLTDDYGIFTY   | Negative |
| P35495 | WGLDYHACGGRLTDDYGTF   | Negative |
| P35495 | LGSAIPWALLFSTATLISTG  | Negative |
| P35495 | FSTATLISTGWGLDYHACGG  | Negative |
| P35495 | LLFSTATLISTGWGLDYHAC  | Negative |
| P35495 | LISTGWGLDYHACGGRLTDD  | Negative |
| P35495 | TGWGLDYHACGGRLTDDYGT  | Negative |
| P35495 | DYHACGGRLTDDYGIFTYK   | Negative |
| P35495 | PWALLFSTATLISTGWGLDY  | Negative |
| P35495 | ISTGWGLDYHACGGRLTDDY  | Negative |
| P35495 | GWGLDYHACGGRLTDDYGTI  | Negative |
| P35495 | KLGSAIPWALLFSTATLIST  | Negative |
| P35495 | GSAIPWALLFSTATLISTGW  | Negative |
| P35495 | IPWALLFSTATLISTGWGLD  | Negative |
| P35495 | ACGGRLTDDYGIFTYKGPK   | Negative |
| P35495 | TLISTGWGLDYHACGGRLTD  | Negative |
| P35495 | YHACGGRLTDDYGIFTYKG   | Negative |
| P35495 | HACGGRLTDDYGIFTYKGP   | Negative |
| P35495 | SAIPWALLFSTATLISTGWG  | Negative |
| P35496 | CGRVIKDTSGSISNTDRQKN  | Negative |
| P35496 | GTAIPWALLLSTATLVSTAR  | Negative |
| P35496 | TATLVSTARINGPDECGRVI  | Negative |
| P35496 | ATLVSTARINGPDECGRVIK  | Negative |
| P35496 | KLGTAIPWALLLSTATLVST  | Negative |
| P35496 | TLVSTARINGPDECGRVIKD  | Negative |
| P35496 | DECGRVIKDTSGSISNTDRQ  | Negative |
| P35496 | LLSTATLVSTARINGPDECGR | Negative |
| P35496 | LSTATLVSTARINGPDECGR  | Negative |
| P35496 | WALLLSTATLVSTARINGPD  | Negative |
| P35496 | STARINGPDECGRVIKDTSG  | Negative |
| P35496 | MKLGTAIPWALLLSTATLVST | Negative |
| P35496 | PDECGRVIKDTSGSISNTDR  | Negative |
| P35496 | INGPDECGRVIKDTSGSISN  | Negative |
| P35496 | PWALLLSTATLVSTARINGP  | Negative |
| P35496 | STATLVSTARINGPDECGRV  | Negative |
| P35496 | TAIPWALLLSTATLVSTARI  | Negative |
| P35496 | TARINGPDECGRVIKDTSGS  | Negative |

|        |                      |          |
|--------|----------------------|----------|
| P35496 | LGTAIPWALLLSTATLVSTA | Negative |
| P35496 | VSTARINGPDECGRVIKDT  | Negative |
| P35496 | GPDECGRVIKDTSGSISNTD | Negative |
| P35496 | LLLSTATLVSTARINGPDEC | Negative |
| P35496 | LVSTARINGPDECGRVIKDT | Negative |
| P35496 | ALLLSTATLVSTARINGPDE | Negative |
| P35496 | RINGPDECGRVIKDTSGSIS | Negative |
| P35496 | ECGRVIKDTSGSISNTDRQK | Negative |
| P35496 | NGPDECGRVIKDTSGSISNT | Negative |
| P35496 | AIPWALLLSTATLVSTARIN | Negative |
| P35496 | ARINGPDECGRVIKDTSGSI | Negative |
| P35501 | QVHSGEIAGGFEYTYNGRKI | Negative |
| P35501 | LTCSASNTPKVQVHSGEIAG | Negative |
| P35501 | GILLNLFLFIGCFLTCSASN | Negative |
| P35501 | IGCFLTCSASNTPKVQVHSG | Negative |
| P35501 | KNTCGILLNLFLFIGCFLTC | Negative |
| P35501 | LFIGCFLTCSASNTPKVQVH | Negative |
| P35501 | CFLTCSASNTPKVQVHSGEI | Negative |
| P35501 | NLFLFIGCFLTCSASNTPKV | Negative |
| P35501 | LLNLFLFIGCFLTCSASNTP | Negative |
| P35501 | TCSASNTPKVQVHSGEIAGG | Negative |
| P35501 | TCGILLNLFLFIGCFLTCSA | Negative |
| P35501 | SASNTPKVQVHSGEIAGGFE | Negative |
| P35501 | LFLFIGCFLTCSASNTPKVQ | Negative |
| P35501 | MKNTCGILLNLFLFIGCFLT | Negative |
| P35501 | CGILLNLFLFIGCFLTCSAS | Negative |
| P35501 | GCFLTCSASNTPKVQVHSGE | Negative |
| P35501 | TPKVQVHSGEIAGGFEYTYN | Negative |
| P35501 | FLTCSASNTPKVQVHSGEIA | Negative |
| P35501 | VQVHSGEIAGGFEYTYNGRK | Negative |
| P35501 | ASNTPKVQVHSGEIAGGFEY | Negative |
| P35501 | FIGCFLTCSASNTPKVQVHS | Negative |
| P35501 | SNTPKVQVHSGEIAGGFEYT | Negative |
| P35501 | ILLNLFLFIGCFLTCSASNT | Negative |
| P35501 | NTPKVQVHSGEIAGGFEYTY | Negative |
| P35501 | FLFIGCFLTCSASNTPKVQV | Negative |
| P35501 | CSASNTPKVQVHSGEIAGGF | Negative |
| P35501 | PKVQVHSGEIAGGFEYTYNG | Negative |
| P35501 | NTCGILLNLFLFIGCFLTCS | Negative |
| P35501 | KVQVHSGEIAGGFEYTYNGR | Negative |
| P35541 | GEAYEGAKDMWRAYSDMREA | Negative |
| P35541 | EGAKDMWRAYSDMREANYKG | Negative |
| P35541 | ILCSLVLGVSQWMSFFGEA  | Negative |
| P35541 | SLVLGVHSQWMSFFGEAYEG | Negative |
| P35541 | LVLGVHSQWMSFFGEAYEGA | Negative |
| P35541 | GAKDMWRAYSDMREANYKGA | Negative |

|        |                       |          |
|--------|-----------------------|----------|
| P35541 | LGVHSQWMSFFGEAYEGAKD  | Negative |
| P35541 | WMSFFGEAYEGAKDMWRAYS  | Negative |
| P35541 | FFGEAYEGAKDMWRAYSDMR  | Negative |
| P35541 | VHSQWMSFFGEAYEGAKDMW  | Negative |
| P35541 | LCSLVLGVHSQWMSFFGEAY  | Negative |
| P35541 | VLGVHSQWMSFFGEAYEGAK  | Negative |
| P35541 | FGEAYEGAKDMWRAYSDMRE  | Negative |
| P35541 | TGLILCSLVLGVHSQWMSFF  | Negative |
| P35541 | QWMSFFGEAYEGAKDMWRAY  | Negative |
| P35541 | AYEGAKDMWRAYSDMREANY  | Negative |
| P35541 | CSLVLGVHSQWMSFFGEAYE  | Negative |
| P35541 | LFTGLILCSLVLGVHSQWMS  | Negative |
| P35541 | SFFGEAYEGAKDMWRAYSDM  | Negative |
| P35541 | GVHSQWMSFFGEAYEGAKDM  | Negative |
| P35541 | LILCSLVLGVHSQWMSFFGE  | Negative |
| P35541 | EAYEGAKDMWRAYSDMREAN  | Negative |
| P35541 | MSFFGEAYEGAKDMWRAYS   | Negative |
| P35541 | KLFTGLILCSLVLGVHSQWM  | Negative |
| P35541 | SQWMSFFGEAYEGAKDMWRA  | Negative |
| P35541 | HSQWMSFFGEAYEGAKDMWR  | Negative |
| P35541 | GLILCSLVLGVHSQWMSFFG  | Negative |
| P35541 | MKLFTGLILCSLVLGVHSQW  | Negative |
| P35541 | YEGAKDMWRAYSDMREANYK  | Negative |
| P35555 | HGADANLEAGNVKETRASRA  | Negative |
| P35555 | RGRLLLEIALGFTVLLASYTS | Negative |
| P35555 | SYTSHGADANLEAGNVKETR  | Negative |
| P35555 | LLASYTSHGADANLEAGNVK  | Negative |
| P35555 | SHGADANLEAGNVKETRASR  | Negative |
| P35555 | ASYTSHGADANLEAGNVKET  | Negative |
| P35555 | FTVLLASYTSHGADANLEAG  | Negative |
| P35555 | NLEAGNVKETRASRAKRRGG  | Negative |
| P35555 | TVLLASYTSHGADANLEAGN  | Negative |
| P35555 | EIALGFTVLLASYTSHGADA  | Negative |
| P35555 | RLLEIALGFTVLLASYTSHG  | Negative |
| P35555 | LEAGNVKETRASRAKRRGGG  | Negative |
| P35555 | GFTVLLASYTSHGADANLEA  | Negative |
| P35555 | YTSHGADANLEAGNVKETRA  | Negative |
| P35555 | EAGNVKETRASRAKRRGGGG  | Negative |
| P35555 | GADANLEAGNVKETRASRAK  | Negative |
| P35555 | LASYTSHGADANLEAGNVKE  | Negative |
| P35555 | VLLASYTSHGADANLEAGNV  | Negative |
| P35555 | LGFTVLLASYTSHGADANLE  | Negative |
| P35555 | RRGRLLLEIALGFTVLLASYT | Negative |
| P35555 | IALGFTVLLASYTSHGADAN  | Negative |
| P35555 | ADANLEAGNVKETRASRAKR  | Negative |
| P35555 | GRLLLEIALGFTVLLASYTSH | Negative |

|        |                       |          |
|--------|-----------------------|----------|
| P35555 | TSHGADANLEAGNVKETRAS  | Negative |
| P35555 | LEIALGFTVLLASYTSHGAD  | Negative |
| P35555 | ANLEAGNVKETRASRAKRRG  | Negative |
| P35555 | LLEIALGFTVLLASYTSHGA  | Negative |
| P35555 | MRRGRLLLEIALGFTVLLASY | Negative |
| P35555 | DANLEAGNVKETRASRAKRR  | Negative |
| P35572 | SALAGCPGCGPGVQEEDAGS  | Negative |
| P35572 | FAAGSEALAGCPGCGPGVQ   | Negative |
| P35572 | SEALAGCPGCGPGVQEEDA   | Negative |
| P35572 | GLPTQPLLMLLMLLFAAGSE  | Negative |
| P35572 | ALAGCPGCGPGVQEEDAGSP  | Negative |
| P35572 | GSEALAGCPGCGPGVQEED   | Negative |
| P35572 | MLLFAAGSEALAGCPGCGP   | Negative |
| P35572 | LFAAGSEALAGCPGCGPGV   | Negative |
| P35572 | PLLMLLMLLFAAGSEALAG   | Negative |
| P35572 | AGCPGCGPGVQEEDAGSPAD  | Negative |
| P35572 | AGSEALAGCPGCGPGVQEE   | Negative |
| P35572 | LLMLLFAAGSEALAGCPGC   | Negative |
| P35572 | CPGCGPGVQEEDAGSPADGC  | Negative |
| P35572 | DGLPTQPLLMLLMLLFAAGS  | Negative |
| P35572 | TWDGLPTQPLLMLLMLLFAA  | Negative |
| P35572 | LPTQPLLMLLMLLFAAGSES  | Negative |
| P35572 | QPLLMLLMLLFAAGSEALA   | Negative |
| P35572 | LLFAAGSEALAGCPGCGPG   | Negative |
| P35572 | LAGCPGCGPGVQEEDAGSPA  | Negative |
| P35572 | PTQPLLMLLMLLFAAGSESA  | Negative |
| P35572 | GCPGCGPGVQEEDAGSPADG  | Negative |
| P35572 | WDGLPTQPLLMLLMLLFAAG  | Negative |
| P35572 | MLLMLLFAAGSEALAGCPG   | Negative |
| P35572 | AAGSEALAGCPGCGPGVQE   | Negative |
| P35572 | LMLLFAAGSEALAGCPGCG   | Negative |
| P35572 | TQPLLMLLMLLFAAGSEAL   | Negative |
| P35572 | LMLLMLLFAAGSEALAGCP   | Negative |
| P35572 | ESALAGCPGCGPGVQEEDAG  | Negative |
| P35572 | MTWDGLPTQPLLMLLMLLFA  | Negative |
| P35578 | DAQKTVGKWHPIGMAKLP    | Negative |
| P35578 | FPVSADIPVVPNFDAQKTVG  | Negative |
| P35578 | LLVFGMTPDYIFPVSADIP   | Negative |
| P35578 | MTPDYIFPVSADIPVVPNFD  | Negative |
| P35578 | VFGMTPDYIFPVSADIPVVP  | Negative |
| P35578 | VSADIPVVPNFDAQKTVGKW  | Negative |
| P35578 | PDYIFPVSADIPVVPNFDAQ  | Negative |
| P35578 | LLVFGMTPDYIFPVSADIPV  | Negative |
| P35578 | VVPNFDAQKTVGKWHPIGMA  | Negative |
| P35578 | IAVLLLFGMTPDYIFPVS    | Negative |
| P35578 | PNFDAQKTVGKWHPIGMAK   | Negative |

|        |                      |          |
|--------|----------------------|----------|
| P35578 | SADIPVVPNFDAQKTVGKWH | Negative |
| P35578 | DYIFPVSADIPVVPNFDAQK | Negative |
| P35578 | ADIPVVPNFDAQKTVGKWH  | Negative |
| P35578 | IFPVSADIPVVPNFDAQKT  | Negative |
| P35578 | GMTPDYIFPVSADIPVVPNF | Negative |
| P35578 | FGMTPDYIFPVSADIPVVPN | Negative |
| P35578 | YIFPVSADIPVVPNFDAQKT | Negative |
| P35578 | VLLLVFGMTPDYIFPVSADI | Negative |
| P35578 | NFDAQKTVGKWHPIGMSK   | Negative |
| P35578 | AVLLLVFGMTPDYIFPVSAD | Negative |
| P35578 | MIAVLLLVFGMTPDYIFPVS | Negative |
| P35578 | DIPVVPNFDAQKTVGKWHPI | Negative |
| P35578 | VVPNFDAQKTVGKWHPIGMS | Negative |
| P35578 | PVVPNFDAQKTVGKWHPIGM | Negative |
| P35578 | PVSADIPVVPNFDAQKTVGK | Negative |
| P35578 | IPVVPNFDAQKTVGKWHPIG | Negative |
| P35578 | FDAQKTVGKWHPIGMSKLP  | Negative |
| P35578 | TPDYIFPVSADIPVVPNFDA | Negative |
| P35625 | ACTCSPSHPQDAFCNSDIVI | Negative |
| P35625 | SPSHPQDAFCNSDIVIRAKV | Negative |
| P35625 | GLIVLLGSWSLGDWGAEACT | Negative |
| P35625 | GSWSLGDWGAEACTCSPSH  | Negative |
| P35625 | LGDWGAEACTCSPSHPQDAF | Negative |
| P35625 | PWLGLIVLLGSWSLGDWGAE | Negative |
| P35625 | LLGSWSLGDWGAEACTCSPS | Negative |
| P35625 | CTCSPSHPQDAFCNSDIVIR | Negative |
| P35625 | AEACTCSPSHPQDAFCNSDI | Negative |
| P35625 | LIVLLGSWSLGDWGAEACTC | Negative |
| P35625 | TCSPSHPQDAFCNSDIVIRA | Negative |
| P35625 | GDWGAEACTCSPSHPQDAFC | Negative |
| P35625 | LGSWSLGDWGAEACTCSPSH | Negative |
| P35625 | CSPSHPQDAFCNSDIVIRAK | Negative |
| P35625 | EACTCSPSHPQDAFCNSDIV | Negative |
| P35625 | SHPQDAFCNSDIVIRAKVVG | Negative |
| P35625 | SLGDWGAEACTCSPSHPQDA | Negative |
| P35625 | MTPWLGLIVLLGSWSLGDWG | Negative |
| P35625 | LGLIVLLGSWSLGDWGAEAC | Negative |
| P35625 | PSHPQDAFCNSDIVIRAKVV | Negative |
| P35625 | GAEACTCSPSHPQDAFCNSD | Negative |
| P35625 | SWSLGDWGAEACTCSPSHPQ | Negative |
| P35625 | TPWLGLIVLLGSWSLGDWGA | Negative |
| P35625 | WLGLIVLLGSWSLGDWGAEA | Negative |
| P35625 | DWGAEACTCSPSHPQDAFCN | Negative |
| P35625 | IVLLGSWSLGDWGAEACTCS | Negative |
| P35625 | WGAEACTCSPSHPQDAFCNS | Negative |
| P35625 | WSLGDWGAEACTCSPSHPQD | Negative |

|        |                      |          |
|--------|----------------------|----------|
| P35625 | HPQDAFCNSDIVIRAKVVGK | Negative |
| P35706 | MRNTARWAATLALTATAVCG | Negative |
| P35706 | ALATPAAAPASLYAPSALVL | Negative |
| P35706 | LTATAVCGPLTGAALATPAA | Negative |
| P35706 | LTGAALATPAAAPASLYAPS | Negative |
| P35706 | TATAVCGPLTGAALATPAAA | Negative |
| P35706 | ATPAAAPASLYAPSALVLTV | Negative |
| P35706 | TPAAAPASLYAPSALVLTVG | Negative |
| P35706 | LALTATAVCGPLTGAALATP | Negative |
| P35706 | NTARWAATLALTATAVCGPL | Negative |
| P35706 | TGAALATPAAAPASLYAPSA | Negative |
| P35706 | PLTGAALATPAAAPASLYAP | Negative |
| P35706 | RWAATLALTATAVCGPLTGA | Negative |
| P35706 | TLALTATAVCGPLTGAALAT | Negative |
| P35706 | ALTATAVCGPLTGAALATPA | Negative |
| P35706 | AVCGPLTGAALATPAAAPAS | Negative |
| P35706 | VCGLTGAALATPAAAPASL  | Negative |
| P35706 | WAATLALTATAVCGPLTGAA | Negative |
| P35706 | LATPAAAPASLYAPSALVLT | Negative |
| P35706 | RNTARWAATLALTATAVCGP | Negative |
| P35706 | TAVCGPLTGAALATPAAAPA | Negative |
| P35706 | PAAAPASLYAPSALVLTVGH | Negative |
| P35706 | ARWAATLALTATAVCGPLTG | Negative |
| P35706 | AATLALTATAVCGPLTGAAL | Negative |
| P35706 | ATAVCGPLTGAALATPAAAP | Negative |
| P35706 | AALATPAAAPASLYAPSALV | Negative |
| P35706 | GAALATPAAAPASLYAPSAL | Negative |
| P35706 | TARWAATLALTATAVCGPLT | Negative |
| P35706 | CGPLTGAALATPAAAPASLY | Negative |
| P35706 | ATLALTATAVCGPLTGAALA | Negative |
| P35755 | TVYNGQHKEAATAVAKAFEQ | Negative |
| P35755 | KLATLAAALAFSANSFADIT | Negative |
| P35755 | ALAFSANSFADITVYNGQHK | Negative |
| P35755 | LATLAAALAFSANSFADITV | Negative |
| P35755 | MQFKHFKLATLAAALAFSAN | Negative |
| P35755 | ANSFADITVYNGQHKEAATA | Negative |
| P35755 | SANSFADITVYNGQHKEAAT | Negative |
| P35755 | DITVYNGQHKEAATAVAKAF | Negative |
| P35755 | VYNGQHKEAATAVAKAFEQE | Negative |
| P35755 | ADITVYNGQHKEAATAVAKA | Negative |
| P35755 | NSFADITVYNGQHKEAATAV | Negative |
| P35755 | TLAAALAFSANSFADITVYN | Negative |
| P35755 | KHFKLATLAAALAFSANSFA | Negative |
| P35755 | ITVYNGQHKEAATAVAKAFE | Negative |
| P35755 | AALAFSANSFADITVYNGQH | Negative |
| P35755 | YNGQHKEAATAVAKAFEQET | Negative |

|        |                        |          |
|--------|------------------------|----------|
| P35755 | LAAALAFSANSFADITVYNG   | Negative |
| P35755 | LAFSANSFADITVYNGQHKE   | Negative |
| P35755 | FSANSFADITVYNGQHKEAA   | Negative |
| P35755 | FKLATLAAALAFSANSFADI   | Negative |
| P35755 | QFKHFKLATLAAALAFSANS   | Negative |
| P35755 | AFSANSFADITVYNGQHKEA   | Negative |
| P35755 | AAALAFSANSFADITVYNGQ   | Negative |
| P35755 | HFKLATLAAALAFSANSFAD   | Negative |
| P35755 | FKHFKLATLAAALAFSANSF   | Negative |
| P35755 | NGQHKEAATAVAKAFEQETG   | Negative |
| P35755 | FADITVYNGQHKEAATAVAK   | Negative |
| P35755 | SFADITVYNGQHKEAATAVA   | Negative |
| P35755 | GQHKEAATAVAKAFEQETGI   | Negative |
| P35759 | IVVAIIHSSQGV DYCKIRCP  | Negative |
| P35759 | IGGLVYLVIVVAIIHSSQGV   | Negative |
| P35759 | EIGGLVYLVIVVAIIHSSQG   | Negative |
| P35759 | IHSSQGV DYCKIRCPSGIHT  | Negative |
| P35759 | DYCKIRCPSGIHTVCQYGES   | Negative |
| P35759 | SQGV DYCKIRCPSGIHTVCQ  | Negative |
| P35759 | GGLVYLVIVVAIIHSSQGV D  | Negative |
| P35759 | QGV DYCKIRCPSGIHTVCQY  | Negative |
| P35759 | VIVVAIIHSSQGV DYCKIRC  | Negative |
| P35759 | GVDYCKIRCPSGIHTVCQYG   | Negative |
| P35759 | LVYLVIVVAIIHSSQGV DY C | Negative |
| P35759 | YCKIRCPSGIHTVCQYGEST   | Negative |
| P35759 | CPSGIHTVCQYGESTKPSKN   | Negative |
| P35759 | YLVIVVAIIHSSQGV DYCKI  | Negative |
| P35759 | IRCPSGIHTVCQYGESTKPS   | Negative |
| P35759 | VDYCKIRCPSGIHTVCQYGE   | Negative |
| P35759 | CKIRCPSGIHTVCQYGESTK   | Negative |
| P35759 | HSSQGV DYCKIRCPSGIHTV  | Negative |
| P35759 | RCPSGIHTVCQYGESTKPSK   | Negative |
| P35759 | KIRCPSGIHTVCQYGESTKP   | Negative |
| P35759 | SSQGV DYCKIRCPSGIHTVC  | Negative |
| P35759 | VAIIHSSQGV DYCKIRCPSG  | Negative |
| P35759 | PSGIHTVCQYGESTKPSKNC   | Negative |
| P35759 | MEIGGLVYLVIVVAIIHSSQ   | Negative |
| P35759 | LVIVVAIIHSSQGV DYCKIR  | Negative |
| P35759 | VVAIIHSSQGV DYCKIRCPS  | Negative |
| P35759 | GLVYLVIVVAIIHSSQGV DY  | Negative |
| P35759 | AIIHSSQGV DYCKIRCPSGI  | Negative |
| P35759 | IIHSSQGV DYCKIRCPSGIH  | Negative |
| P35775 | QIIYADNKELKIIRKDVAEC   | Negative |
| P35775 | DVAECLRTL PKCGNQPDPL   | Negative |
| P35775 | GFAQIIYADNKELKIIRKDV   | Negative |
| P35775 | NKELKIIRKDV AECLRTL PK | Negative |

|        |                      |          |
|--------|----------------------|----------|
| P35775 | LGFAQIIYADNKELKIIRKD | Negative |
| P35775 | FAQIIYADNKELKIIRKDVA | Negative |
| P35775 | LATCLLGFAQIIYADNKELK | Negative |
| P35775 | TCLLGFAQIIYADNKELKII | Negative |
| P35775 | RKDVAECLRTLPKCGNQPD  | Negative |
| P35775 | CLLGFAQIIYADNKELKIIR | Negative |
| P35775 | IIYADNKELKIIRKDVAECL | Negative |
| P35775 | LKIIRKDVAECLRTLPKCGN | Negative |
| P35775 | KDVAECLRTLPKCGNQPD   | Negative |
| P35775 | ELKIIRKDVAECLRTLPKCG | Negative |
| P35775 | LLGFAQIIYADNKELKIIRK | Negative |
| P35775 | SFVLATCLLGFAQIIYADNK | Negative |
| P35775 | YADNKELKIIRKDVAECLRT | Negative |
| P35775 | MKSFVLATCLLGFAQIIYAD | Negative |
| P35775 | DNKELKIIRKDVAECLRTL  | Negative |
| P35775 | IIRKDVAECLRTLPKCGNQ  | Negative |
| P35775 | IYADNKELKIIRKDVAECLR | Negative |
| P35775 | FVLATCLLGFAQIIYADNKE | Negative |
| P35775 | KSFVLATCLLGFAQIIYADN | Negative |
| P35775 | ATCLLGFAQIIYADNKELKI | Negative |
| P35775 | ADNKELKIIRKDVAECLRTL | Negative |
| P35775 | IRKDVAECLRTLPKCGNQPD | Negative |
| P35775 | KELKIIRKDVAECLRTLPKC | Negative |
| P35775 | KIIRKDVAECLRTLPKCGNQ | Negative |
| P35775 | AQIIYADNKELKIIRKDVAE | Negative |
| P35777 | TFVLVSCLLVFTQIIYALDI | Negative |
| P35777 | IKEISIMNRILEKCIRTVPK | Negative |
| P35777 | KTFVLVSCLLVFTQIIYALD | Negative |
| P35777 | SIMNRILEKCIRTVPKREND | Negative |
| P35777 | VFTQIIYALDIKEISIMNRI | Negative |
| P35777 | DIKEISIMNRILEKCIRTVP | Negative |
| P35777 | NRILEKCIRTVPKRENDPIN | Negative |
| P35777 | LVFTQIIYALDIKEISIMNR | Negative |
| P35777 | FTQIIYALDIKEISIMNRIL | Negative |
| P35777 | FVLVSCLLVFTQIIYALDIK | Negative |
| P35777 | TQIIYALDIKEISIMNRILE | Negative |
| P35777 | IYALDIKEISIMNRILEKCI | Negative |
| P35777 | LDIKEISIMNRILEKCIRTV | Negative |
| P35777 | QIIYALDIKEISIMNRILEK | Negative |
| P35777 | ISIMNRILEKCIRTVPKREN | Negative |
| P35777 | ALDIKEISIMNRILEKCIRT | Negative |
| P35777 | MNRILEKCIRTVPKRENDPI | Negative |
| P35777 | LLVFTQIIYALDIKEISIMN | Negative |
| P35777 | SCLLVFTQIIYALDIKEISI | Negative |
| P35777 | MKTFVLVSCLLVFTQIIYAL | Negative |
| P35777 | KEISIMNRILEKCIRTVPKR | Negative |



|        |                       |          |
|--------|-----------------------|----------|
| P35777 | EISIMNRILEKCIRTVPKRE  | Negative |
| P35777 | CLLVFTQIIYALDIKEISIM  | Negative |
| P35777 | VSCLLVFTQIIYALDIKEIS  | Negative |
| P35777 | LVSCLLVFTQIIYALDIKEI  | Negative |
| P35777 | YALDIKEISIMNRILEKCIR  | Negative |
| P35777 | IMNRILEKCIRTVPKRENDP  | Negative |
| P35777 | IYYALDIKEISIMNRILEKC  | Negative |
| P35777 | RILEKCIRTVPKRENDPINP  | Negative |
| P35778 | IVSILWLAITAENLANTLAT  | Negative |
| P35778 | TAENLANTLATNYCNLQSCCK | Negative |
| P35778 | QSCKRNNAIHTMCQYTSPTP  | Negative |
| P35778 | SILWLAITAENLANTLATNY  | Negative |
| P35778 | ANTLATNYCNLQSCKRNNAI  | Negative |
| P35778 | LANTLATNYCNLQSCKRNNAI | Negative |
| P35778 | TNYCNLQSCKRNNAIHTMCQ  | Negative |
| P35778 | VSILWLAITAENLANTLATN  | Negative |
| P35778 | ELIVSILWLAITAENLANTL  | Negative |
| P35778 | NLQSCKRNNAIHTMCQYTSPT | Negative |
| P35778 | NLATNYCNLQSCKRNNAIH   | Negative |
| P35778 | LATNYCNLQSCKRNNAIHTM  | Negative |
| P35778 | LIVSILWLAITAENLANTLA  | Negative |
| P35778 | SCKRNNAIHTMCQYTSPTPG  | Negative |
| P35778 | AENLANTLATNYCNLQSCKR  | Negative |
| P35778 | LQSCKRNNAIHTMCQYTSPT  | Negative |
| P35778 | ITAENLANTLATNYCNLQSC  | Negative |
| P35778 | AITAENLANTLATNYCNLQS  | Negative |
| P35778 | YCNLQSCKRNNAIHTMCQYT  | Negative |
| P35778 | ILWLAITAENLANTLATNYC  | Negative |
| P35778 | MELIVSILWLAITAENLANT  | Negative |
| P35778 | NYCNLQSCKRNNAIHTMCQY  | Negative |
| P35778 | ATNYCNLQSCKRNNAIHTMC  | Negative |
| P35778 | WLAITAENLANTLATNYCNL  | Negative |
| P35778 | LAITAENLANTLATNYCNLQ  | Negative |
| P35778 | CNLQSCKRNNAIHTMCQYTS  | Negative |
| P35778 | ENLANTLATNYCNLQSCKRNN | Negative |
| P35778 | NLANTLATNYCNLQSCKRNN  | Negative |
| P35778 | TLATNYCNLQSCKRNNAIHT  | Negative |
| P35807 | VVCAALSAAQLNFSTGWGRR  | Negative |
| P35807 | TGWGRRYADPNADPMAFLYK  | Negative |
| P35807 | STGWGRRYADPNADPMAFLY  | Negative |
| P35807 | LTLMLLVVCAALSAAQLNF   | Negative |
| P35807 | NFSTGWGRRYADPNADPMAF  | Negative |
| P35807 | VCAALSAAQLNFSTGWGRRY  | Negative |
| P35807 | AQLNFSTGWGRRYADPNADP  | Negative |
| P35807 | CAALSAAQLNFSTGWGRRYA  | Negative |
| P35807 | QGCALTMLLVVCAALSAA    | Negative |

|        |                       |          |
|--------|-----------------------|----------|
| P35807 | QLNFSTGWGRRYADPNADPM  | Negative |
| P35807 | RQGCALTLMLLVVCAALSA   | Negative |
| P35807 | ALSAAQLNFSTGWGRRYADP  | Negative |
| P35807 | AALSAAQLNFSTGWGRRYAD  | Negative |
| P35807 | LLVVVCAALSAAQLNFSTGW  | Negative |
| P35807 | CALTLMLLVVVCAALSAAQL  | Negative |
| P35807 | LSAAQLNFSTGWGRRYADPN  | Negative |
| P35807 | FSTGWGRRYADPNADPMAFL  | Negative |
| P35807 | GCALTLMLLVVVCAALSAAQ  | Negative |
| P35807 | ALTLMLLVVVCAALSAAQLN  | Negative |
| P35807 | MRQGCALTLMLLVVVCAALS  | Negative |
| P35807 | LVVVCAALSAAQLNFSTGWG  | Negative |
| P35807 | GWGRRYADPNADPMAFLYKL  | Negative |
| P35807 | MLLVVVCAALSAAQLNFSTG  | Negative |
| P35807 | LMLLVVVCAALSAAQLNFST  | Negative |
| P35807 | LNFSSTGWGRRYADPNADPMA | Negative |
| P35807 | WGRRYADPNADPMAFLYKLI  | Negative |
| P35807 | AAQLNFSTGWGRRYADPNAD  | Negative |
| P35807 | SAAQLNFSTGWGRRYADPNA  | Negative |
| P35807 | VVVCAALSAAQLNFSTGWGR  | Negative |
| P35811 | AMALGMASTAFQAQDFCSNAQ | Negative |
| P35811 | QDFCSNAQHSGQKVTITSNQ  | Negative |
| P35811 | DFCSNAQHSGQKVTITSNQT  | Negative |
| P35811 | FAMALGMASTAFQAQDFCSNA | Negative |
| P35811 | SSVVFAMALGMASTAFQAQDF | Negative |
| P35811 | ALGMASTAFQAQDFCSNAQHS | Negative |
| P35811 | TKSSVVFAMALGMASTAFQAQ | Negative |
| P35811 | SVVFAMALGMASTAFQAQDFC | Negative |
| P35811 | MALGMASTAFQAQDFCSNAQH | Negative |
| P35811 | KTFSVTKSSVVFAMALGMAS  | Negative |
| P35811 | TFSVTKSSVVFAMALGMAST  | Negative |
| P35811 | ASTAFQAQDFCSNAQHSGQKV | Negative |
| P35811 | SNAQHSGQKVTITSNQTGKI  | Negative |
| P35811 | FAQDFCSNAQHSGQKVTITS  | Negative |
| P35811 | SVTKSSVVFAMALGMASTAF  | Negative |
| P35811 | MASTAFQAQDFCSNAQHSGQK | Negative |
| P35811 | AQDFCSNAQHSGQKVTITSN  | Negative |
| P35811 | STAFQAQDFCSNAQHSGQKVT | Negative |
| P35811 | FCSNAQHSGQKVTITSNQTG  | Negative |
| P35811 | CSNAQHSGQKVTITSNQTGK  | Negative |
| P35811 | GMASTAFQAQDFCSNAQHSGQ | Negative |
| P35811 | LGMASTAFQAQDFCSNAQHSG | Negative |
| P35811 | KSSVVFAMALGMASTAFQAQD | Negative |
| P35811 | VFAMALGMASTAFQAQDFCSN | Negative |
| P35811 | MKTFSVTKSSVVFAMALGMA  | Negative |
| P35811 | VTKSSVVFAMALGMASTAF   | Negative |

|        |                        |          |
|--------|------------------------|----------|
| P35811 | TAF AQDFCSNAQHSGQKV TI | Negative |
| P35811 | FSVTKSSVVFAMALGMASTA   | Negative |
| P35811 | AFAQDFCSNAQHSGQKV TIT  | Negative |
| P35823 | IVVGSAAPAFADVVISPN DN  | Negative |
| P35823 | VVGSAAPAFADVVISPN DNT  | Negative |
| P35823 | DVVISPN DNTFVTTSLASVT  | Negative |
| P35823 | AAAI VVGSAAPAFADVVIS P | Negative |
| P35823 | TLIAAAI VVGSAAPAFADV V | Negative |
| P35823 | VISPN DNTFVTTSLASVTKQ  | Negative |
| P35823 | LIAAAI VVGSAAPAFADVVI  | Negative |
| P35823 | PNDNTFVTTSLASVTKQPVL   | Negative |
| P35823 | AAPAFADVVISPN DNTFVTT  | Negative |
| P35823 | NTFVTTSLASVTKQPVLDFS   | Negative |
| P35823 | ISPNDNTFVTTSLASVTKQP   | Negative |
| P35823 | KTLIAAAI VVGSAAPAFADV  | Negative |
| P35823 | FADVVISPN DNTFVTTSLAS  | Negative |
| P35823 | MFKKTLIAAAI VVGSAAPAF  | Negative |
| P35823 | APAFADVVISPN DNTFVTT S | Negative |
| P35823 | DNTFVTTSLASVTKQPVLDF   | Negative |
| P35823 | KKTLIAAAI VVGSAAPAFAD  | Negative |
| P35823 | SPNDNTFVTTSLASVTKQP V  | Negative |
| P35823 | NDNTFVTTSLASVTKQPVL D  | Negative |
| P35823 | ADVVISPN DNTFVTTSLASV  | Negative |
| P35823 | GSAAPAFADVVISPN DNTFV  | Negative |
| P35823 | SAAPAFADVVISPN DNTFVT  | Negative |
| P35823 | FKKTLIAAAI VVGSAAPAF A | Negative |
| P35823 | AAI VVGSAAPAFADVVISPN  | Negative |
| P35823 | VVISPN DNTFVTTSLASVTK  | Negative |
| P35823 | PAFADVVISPN DNTFVTTSL  | Negative |
| P35823 | VGSAAPAFADVVISPN DNTF  | Negative |
| P35823 | AFADVVISPN DNTFVTTSLA  | Negative |
| P35823 | AI VVGSAAPAFADVVISPN D | Negative |
| P35858 | LLLLSWVALGPRSLEGADPG   | Negative |
| P35858 | LGPRSLEGADPGTPGEAEGP   | Negative |
| P35858 | ALLLSWVALGPRSLEGADP    | Negative |
| P35858 | PRSLEGADPGTPGEAEGPAC   | Negative |
| P35858 | WVALGPRSLEGADPGTPGEA   | Negative |
| P35858 | ALGPRSLEGADPGTPGEAEG   | Negative |
| P35858 | SLEGADPGTPGEAEGPACPA   | Negative |
| P35858 | RKGGLALALLLSWVALGPR    | Negative |
| P35858 | ALRKGGLALALLLSWVALG    | Negative |
| P35858 | KGGLALALLLSWVALGPRS    | Negative |
| P35858 | GGLALALLLSWVALGPRSL    | Negative |
| P35858 | MALRKGGLALALLLSWVAL    | Negative |
| P35858 | LALLLSWVALGPRSLEGAD    | Negative |
| P35858 | DPGTPGEAEGPACPAACVCS   | Negative |

|        |                      |          |
|--------|----------------------|----------|
| P35858 | ADPGTPGEAEGPACPAACVC | Negative |
| P35858 | LSWVALGPRSLEGADPGTPG | Negative |
| P35858 | SWVALGPRSLEGADPGTPGE | Negative |
| P35858 | RSLEGADPGTPGEAEGPACP | Negative |
| P35858 | LRKGGLALALLLSWVALGP  | Negative |
| P35858 | LALALLLSWVALGPRSLEG  | Negative |
| P35858 | GLALALLLSWVALGPRSLE  | Negative |
| P35858 | PGTPGEAEGPACPAACVCSY | Negative |
| P35858 | GADPGTPGEAEGPACPAACV | Negative |
| P35858 | EGADPGTPGEAEGPACPAAC | Negative |
| P35858 | LEGADPGTPGEAEGPACPA  | Negative |
| P35858 | GPRSLEGADPGTPGEAEGPA | Negative |
| P35858 | ALALLLSWVALGPRSLEGA  | Negative |
| P35858 | VALGPRSLEGADPGTPGEAE | Negative |
| P35858 | LLSWVALGPRSLEGADPGTP | Negative |
| P35859 | VVLLAFWVALGPCHLQGTDP | Negative |
| P35859 | QGTDPGASADAEGPQCPVAC | Negative |
| P35859 | GGPALVVLLAFWVALGPCHL | Negative |
| P35859 | RTGGPALVVLLAFWVALGPC | Negative |
| P35859 | LQGTDPGASADAEGPQCPVA | Negative |
| P35859 | LLAFWVALGPCHLQGTDPGA | Negative |
| P35859 | GPCHLQGTDPGASADAEGPQ | Negative |
| P35859 | PGASADAEGPQCPVACTCSH | Negative |
| P35859 | TDPGASADAEGPQCPVACTC | Negative |
| P35859 | HLQGTDPGASADAEGPQCPV | Negative |
| P35859 | PCHLQGTDPGASADAEGPQC | Negative |
| P35859 | GTDPGASADAEGPQCPVACT | Negative |
| P35859 | PALVVLLAFWVALGPCHLQG | Negative |
| P35859 | LAFWVALGPCHLQGTDPGAS | Negative |
| P35859 | VALGPCHLQGTDPGASADAE | Negative |
| P35859 | ALGPCHLQGTDPGASADAEG | Negative |
| P35859 | AFWVALGPCHLQGTDPGASA | Negative |
| P35859 | CHLQGTDPGASADAEGPQCP | Negative |
| P35859 | LVVLLAFWVALGPCHLQGTD | Negative |
| P35859 | VLLAFWVALGPCHLQGTDPG | Negative |
| P35859 | LRTGGPALVVLLAFWVALGP | Negative |
| P35859 | WVALGPCHLQGTDPGASADA | Negative |
| P35859 | DPGASADAEGPQCPVACTCS | Negative |
| P35859 | TGGPALVVLLAFWVALGPCH | Negative |
| P35859 | ALRTGGPALVVLLAFWVALG | Negative |
| P35859 | LGPCHLQGTDPGASADAEGP | Negative |
| P35859 | MALRTGGPALVVLLAFWVAL | Negative |
| P35859 | FWVALGPCHLQGTDPGASAD | Negative |
| P35859 | GPALVVLLAFWVALGPCHLQ | Negative |
| P36222 | VLLQCCSAYKLVICYTSWSQ | Negative |
| P36222 | LVCYYTSWSQYREGDGSCFP | Negative |

|        |                      |          |
|--------|----------------------|----------|
| P36222 | LLQCCSAYKLVCYYTSWSQY | Negative |
| P36222 | SWSQYREGDGSCFPDALDRF | Negative |
| P36222 | SAYKLVCYYTSWSQYREGDG | Negative |
| P36222 | ASQTGFVVLVLLQCCSAYKL | Negative |
| P36222 | CYYTSWSQYREGDGSCFPDA | Negative |
| P36222 | QCCSAYKLVCYYTSWSQYRE | Negative |
| P36222 | VLVLLQCCSAYKLVCYYTSW | Negative |
| P36222 | GFVVLVLLQCCSAYKLVCYY | Negative |
| P36222 | VCYYTSWSQYREGDGSCFPD | Negative |
| P36222 | YTSWSQYREGDGSCFPDALD | Negative |
| P36222 | LVLLQCCSAYKLVCYYTSWS | Negative |
| P36222 | KLVCYYTSWSQYREGDGSCF | Negative |
| P36222 | SQTGFVVLVLLQCCSAYKLV | Negative |
| P36222 | VKASQTGFVVLVLLQCCSAY | Negative |
| P36222 | CCSAYKLVCYYTSWSQYREG | Negative |
| P36222 | LQCCSAYKLVCYYTSWSQYR | Negative |
| P36222 | YKLVCYYTSWSQYREGDGSC | Negative |
| P36222 | CSAYKLVCYYTSWSQYREGD | Negative |
| P36222 | FVVLVLLQCCSAYKLVCYYT | Negative |
| P36222 | YYTSWSQYREGDGSCFPDAL | Negative |
| P36222 | MGVKASQTGFVVLVLLQCCS | Negative |
| P36222 | VVLVLLQCCSAYKLVCYYTS | Negative |
| P36222 | TGFVVLVLLQCCSAYKLVCY | Negative |
| P36222 | KASQTGFVVLVLLQCCSAYK | Negative |
| P36222 | TSWSQYREGDGSCFPDALDR | Negative |
| P36222 | AYKLVCYYTSWSQYREGDGS | Negative |
| P36222 | GVKASQTGFVVLVLLQCCSA | Negative |
| P36233 | EALPDETEVVEETVAEVAEV | Negative |
| P36233 | APQQEALPDETEVVEETVAE | Negative |
| P36233 | ALPDETEVVEETVAEVAEVA | Negative |
| P36233 | VCLAGRALAAPQQEALPDET | Negative |
| P36233 | LAAPQQEALPDETEVVEETV | Negative |
| P36233 | EVVEETVAEVAEVAEVPVGA | Negative |
| P36233 | QQEALPDETEVVEETVAEVA | Negative |
| P36233 | PDETEVVEETVAEVAEVAEV | Negative |
| P36233 | QEALPDETEVVEETVAEVAE | Negative |
| P36233 | RALAAPQQEALPDETEVVEE | Negative |
| P36233 | ALAAPQQEALPDETEVVEET | Negative |
| P36233 | MKAWIFFLVCLAGRALAAPQ | Negative |
| P36233 | FLVCLAGRALAAPQQEALPD | Negative |
| P36233 | LAGRALAAPQQEALPDETEV | Negative |
| P36233 | CLAGRALAAPQQEALPDETE | Negative |
| P36233 | VVEETVAEVAEVAEVPVGAN | Negative |
| P36233 | KAWIFFLVCLAGRALAAPQQ | Negative |
| P36233 | PQQEALPDETEVVEETVAEV | Negative |
| P36233 | LPDETEVVEETVAEVAEVAE | Negative |

|        |                      |          |
|--------|----------------------|----------|
| P36233 | AGRALAAPQQEALPDETEVV | Negative |
| P36233 | GRALAAPQQEALPDETEVVE | Negative |
| P36233 | AAPQQEALPDETEVVEETVA | Negative |
| P36233 | DETEVVEETVAEVAEVAEVP | Negative |
| P36233 | IFFLVCLAGRALAAPQQEAL | Negative |
| P36233 | ETEVEETVAEVAEVAEVPV  | Negative |
| P36233 | FFLVCLAGRALAAPQQEALP | Negative |
| P36233 | TEVVEETVAEVAEVAEVPVG | Negative |
| P36233 | LVCLAGRALAAPQQEALPDE | Negative |
| P36233 | WIFFLVCLAGRALAAPQQEA | Negative |
| P36560 | PAPTATTTKAAPAKTTHHKK | Negative |
| P36560 | AAFAAETTTTPAPTATTTKA | Negative |
| P36560 | TTPAPTATTTKAAPAKTTHH | Negative |
| P36560 | ALVVAAAMGLSSAAFAAETT | Negative |
| P36560 | TTTTAPTATTTKAAPAKTT  | Negative |
| P36560 | VLALVVAAAMGLSSAAFAAE | Negative |
| P36560 | VAAAMGLSSAAFAAETTTTP | Negative |
| P36560 | PTATTTKAAPAKTTHHKKQH | Negative |
| P36560 | AETTTTPAPTATTTKAAPAK | Negative |
| P36560 | SAAFAAETTTTPAPTATTTK | Negative |
| P36560 | MGLSSAAFAAETTTTPAPTA | Negative |
| P36560 | FAAETTTTPAPTATTTKAAP | Negative |
| P36560 | KVLALVVAAAMGLSSAAFAA | Negative |
| P36560 | LSSAAFAAETTTTPAPTATT | Negative |
| P36560 | AAMGLSSAAFAAETTTTPAP | Negative |
| P36560 | TTTPAPTATTTKAAPAKTTH | Negative |
| P36560 | SSAAFAAETTTTPAPTATTT | Negative |
| P36560 | APTATTTKAAPAKTTHHKKQ | Negative |
| P36560 | AFAAETTTTPAPTATTTKAA | Negative |
| P36560 | KKVLALVVAAAMGLSSAAFA | Negative |
| P36560 | TPAPTATTTKAAPAKTTHHK | Negative |
| P36560 | LALVVAAAMGLSSAAFAAET | Negative |
| P36560 | VVAAAMGLSSAAFAAETTTT | Negative |
| P36560 | AAAMGLSSAAFAAETTTTPA | Negative |
| P36560 | ETTTTPAPTATTTKAAPAKT | Negative |
| P36560 | MKKVLALVVAAAMGLSSAAF | Negative |
| P36560 | AMGLSSAAFAAETTTTPAPT | Negative |
| P36560 | AAETTTTPAPTATTTKAAPA | Negative |
| P36560 | GLSSAAFAAETTTTPAPTAT | Negative |
| P36911 | LVFLAFPFWTSCARDNPLS  | Negative |
| P36911 | MKKFINQFSASLKNNILVFL | Negative |
| P36911 | AFPFWTSCARDNPLSSENS  | Negative |
| P36911 | KNNILVFLAFPFWTSCARD  | Negative |
| P36911 | FSASLKNNILVFLAFPFWT  | Negative |
| P36911 | PFVWTSCARDNPLSENSNI  | Negative |
| P36911 | KFINQFSASLKNNILVFLAF | Negative |

|        |                       |          |
|--------|-----------------------|----------|
| P36911 | VFLAFPFWWTSCARDNPLSS  | Negative |
| P36911 | QFSASLKNNILVFLAFPFWW  | Negative |
| P36911 | FLAFPFWWTSCARDNPLSSE  | Negative |
| P36911 | WTSCARDNPLSSSENSNISP  | Negative |
| P36911 | ARDNPLSSSENSNISPNAAR  | Negative |
| P36911 | SASLKNNILVFLAFPFWWTS  | Negative |
| P36911 | NNILVFLAFPFWWTSCARDN  | Negative |
| P36911 | KKFINQFSASLKNNILVFLA  | Negative |
| P36911 | NILVFLAFPFWWTSCARDNP  | Negative |
| P36911 | CARDNPLSSSENSNISPNA   | Negative |
| P36911 | TSCARDNPLSSSENSNISPNA | Negative |
| P36911 | LKNNILVFLAFPFWWTSCAR  | Negative |
| P36911 | FPFWWTSCARDNPLSSSENS  | Negative |
| P36911 | NQFSASLKNNILVFLAFPFW  | Negative |
| P36911 | FINQFSASLKNNILVFLAFP  | Negative |
| P36911 | INQFSASLKNNILVFLAFP   | Negative |
| P36911 | ASLKNNILVFLAFPFWWTSC  | Negative |
| P36911 | LAFPFWWTSCARDNPLSSEN  | Negative |
| P36911 | ILVFLAFPFWWTSCARDNPL  | Negative |
| P36911 | SLKNNILVFLAFPFWWTSCA  | Negative |
| P36911 | FVWTSCARDNPLSSSENSNIS | Negative |
| P36911 | SCARDNPLSSSENSNISPNA  | Negative |
| P36911 | VWTSCARDNPLSSSENSNISP | Negative |
| P36917 | SLFSPPIRVFADDTNINLVS  | Negative |
| P36917 | NVDRIVSIVTALIMIFGASL  | Negative |
| P36917 | KNNVDRIVSIVTALIMIFGA  | Negative |
| P36917 | ALIMIFGASLFSPPIRVFAD  | Negative |
| P36917 | PIRVFADDTNINLVSNGDFE  | Negative |
| P36917 | IMIFGASLFSPPIRVFADDT  | Negative |
| P36917 | GASLFSPPIRVFADDTNINL  | Negative |
| P36917 | MIFGASLFSPPIRVFADDTN  | Negative |
| P36917 | RIVSIVTALIMIFGASLFSP  | Negative |
| P36917 | RVFADDTNINLVSNGDFESG  | Negative |
| P36917 | MKNNVDRIVSIVTALIMIFG  | Negative |
| P36917 | SIVTALIMIFGASLFSPPIR  | Negative |
| P36917 | PPIRVFADDTNINLVSNGDF  | Negative |
| P36917 | IVTALIMIFGASLFSPPIRV  | Negative |
| P36917 | NNVDRIVSIVTALIMIFGAS  | Negative |
| P36917 | IVSIVTALIMIFGASLFSP   | Negative |
| P36917 | LFSPPIRVFADDTNINLVS   | Negative |
| P36917 | IRVFADDTNINLVSNGDFES  | Negative |
| P36917 | FSPPIRVFADDTNINLVSNG  | Negative |
| P36917 | VDRIVSIVTALIMIFGASLF  | Negative |
| P36917 | LIMIFGASLFSPPIRVFADD  | Negative |
| P36917 | SPPIRVFADDTNINLVSNGD  | Negative |
| P36917 | TALIMIFGASLFSPPIRVFA  | Negative |

|        |                      |          |
|--------|----------------------|----------|
| P36917 | VTALIMIFGASLFSPPIRVF | Negative |
| P36917 | VSIVTALIMIFGASLFSPI  | Negative |
| P36917 | DRIVSIVTALIMIFGASLFS | Negative |
| P36917 | FGASLFSPPIRVFADDTNIN | Negative |
| P36917 | MMKNNVDRIVSIVTALIMIF | Negative |
| P36917 | ASLFSPPIRVFADDTNINLV | Negative |
| P36980 | SRISSVGGEAMFCDFPKINH | Negative |
| P36980 | GGEAMFCDFPKINHGILYDE | Negative |
| P36980 | ILISRISSVGGEAMFCDFPK | Negative |
| P36980 | SVILISRISSVGGEAMFCDF | Negative |
| P36980 | WLLVSVILISRISSVGGEAM | Negative |
| P36980 | GEAMFCDFPKINHGILYDEE | Negative |
| P36980 | VILISRISSVGGEAMFCDFP | Negative |
| P36980 | VSVILISRISSVGGEAMFCD | Negative |
| P36980 | ISRISSVGGEAMFCDFPKIN | Negative |
| P36980 | CDFPKINHGILYDEEKYKPF | Negative |
| P36980 | AMFCDFPKINHGILYDEEKY | Negative |
| P36980 | FCDFPKINHGILYDEEKYKP | Negative |
| P36980 | VGGEAMFCDFPKINHGILYD | Negative |
| P36980 | LISRISSVGGEAMFCDFPKI | Negative |
| P36980 | SVGGEAMFCDFPKINHGILY | Negative |
| P36980 | SSVGGEAMFCDFPKINHGIL | Negative |
| P36980 | EAMFCDFPKINHGILYDEEK | Negative |
| P36980 | LLVSVILISRISSVGGEAMF | Negative |
| P36980 | RISSVGGEAMFCDFPKINHG | Negative |
| P36980 | PKINHGILYDEEKYKPFSQV | Negative |
| P36980 | MWLLVSVILISRISSVGGEA | Negative |
| P36980 | INHGILYDEEKYKPFSQVPT | Negative |
| P36980 | DFPKINHGILYDEEKYKPFS | Negative |
| P36980 | KINHGILYDEEKYKPFSQVP | Negative |
| P36980 | FPKINHGILYDEEKYKPFSQ | Negative |
| P36980 | ISSVGGEAMFCDFPKINHGI | Negative |
| P36980 | NHGILYDEEKYKPFSQVPTG | Negative |
| P36980 | HGILYDEEKYKPFSQVPTGE | Negative |
| P36980 | MFCDFPKINHGILYDEEKYK | Negative |
| P37028 | SFLAPLWLNAAPRVITLSPA | Negative |
| P37028 | APRVITLSPANTELAFAGI  | Negative |
| P37028 | WLNAAPRVITLSPANTELAF | Negative |
| P37028 | LWLNAAPRVITLSPANTELA | Negative |
| P37028 | LNAAPRVITLSPANTELAF  | Negative |
| P37028 | LVALSFLAPLWLNAAPRVIT | Negative |
| P37028 | RVITLSPANTELAFAGITP  | Negative |
| P37028 | AAPRVITLSPANTELAFAG  | Negative |
| P37028 | FLAPLWLNAAPRVITLSPAN | Negative |
| P37028 | LAPLWLNAAPRVITLSPANT | Negative |
| P37028 | RALVALSFLAPLWLNAAPRV | Negative |



|        |                      |          |
|--------|----------------------|----------|
| P37028 | PRVITLSPANTELAFAGIT  | Negative |
| P37028 | LFRALVALSFLAPLWLNAAP | Negative |
| P37028 | ALSFLAPLWLNAAPRVITLS | Negative |
| P37028 | TLSPANTELAFAGITPVGV  | Negative |
| P37028 | PLWLNAAPRVITLSPANTEL | Negative |
| P37028 | AKSLFRALVALSFLAPLWLN | Negative |
| P37028 | VALSFLAPLWLNAAPRVITL | Negative |
| P37028 | LSFLAPLWLNAAPRVITLSP | Negative |
| P37028 | SPANTELAFAGITPVGVSS  | Negative |
| P37028 | FRALVALSFLAPLWLNAAPR | Negative |
| P37028 | VITLSPANTELAFAGITPV  | Negative |
| P37028 | LSPANTELAFAGITPVGVS  | Negative |
| P37028 | ITLSPANTELAFAGITPVG  | Negative |
| P37028 | SLFRALVALSFLAPLWLNA  | Negative |
| P37028 | KSLFRALVALSFLAPLWLNA | Negative |
| P37028 | NAAPRVITLSPANTELAFAA | Negative |
| P37028 | MAKSLFRALVALSFLAPLWL | Negative |
| P37028 | APLWLNAAPRVITLSPANTE | Negative |
| P37042 | RKILVGVLLFTASVAICLAQ | Negative |
| P37042 | LFTASVAICLAQHWSYGLQP | Negative |
| P37042 | SVAICLAQHWSYGLQPGGKR | Negative |
| P37042 | AQHWSYGLQPGGKRNAENLV | Negative |
| P37042 | CLAQHWSYGLQPGGKRNAEN | Negative |
| P37042 | ASVAICLAQHWSYGLQPGGK | Negative |
| P37042 | LAQHWSYGLQPGGKRNAENL | Negative |
| P37042 | LLFTASVAICLAQHWSYGLQ | Negative |
| P37042 | AICLAQHWSYGLQPGGKRNA | Negative |
| P37042 | VLLFTASVAICLAQHWSYGL | Negative |
| P37042 | ICLAQHWSYGLQPGGKRNAE | Negative |
| P37042 | LVGVLLFTASVAICLAQHWS | Negative |
| P37042 | WSYGLQPGGKRNAENLVESF | Negative |
| P37042 | SRKILVGVLLFTASVAICLA | Negative |
| P37042 | VAICLAQHWSYGLQPGGKRN | Negative |
| P37042 | QHWSYGLQPGGKRNAENLVE | Negative |
| P37042 | EKSRKILVGVLLFTASVAIC | Negative |
| P37042 | KSRKILVGVLLFTASVAICL | Negative |
| P37042 | TASVAICLAQHWSYGLQPGG | Negative |
| P37042 | HWSYGLQPGGKRNAENLVES | Negative |
| P37042 | SYGLQPGGKRNAENLVESFQ | Negative |
| P37042 | FTASVAICLAQHWSYGLQPG | Negative |
| P37042 | LQPGGKRNAENLVESFQEIA | Negative |
| P37042 | YGLQPGGKRNAENLVESFQE | Negative |
| P37042 | MEKSRKILVGVLLFTASVAI | Negative |
| P37042 | GLQPGGKRNAENLVESFQEI | Negative |
| P37042 | ILVGVLLFTASVAICLAQHW | Negative |
| P37042 | GVLLFTASVAICLAQHWSYG | Negative |

|        |                       |          |
|--------|-----------------------|----------|
| P37042 | KILVGVLLFTASVAICLAQH  | Negative |
| P37109 | LWVVALALAALFIVDREVPV  | Negative |
| P37109 | REVPVSAEKQVFSRMPICEH  | Negative |
| P37109 | MAVRLWVVALALAALFIVDR  | Negative |
| P37109 | AALFIVDREVPVSAEKQVFS  | Negative |
| P37109 | IVDREVPVSAEKQVFSRMPI  | Negative |
| P37109 | ALAALFIVDREVPVSAEKQV  | Negative |
| P37109 | VRLWVVALALAALFIVDREV  | Negative |
| P37109 | LFIVDREVPVSAEKQVFSRM  | Negative |
| P37109 | EVPVSAEKQVFSRMPICEHM  | Negative |
| P37109 | AVRLWVVALALAALFIVDRE  | Negative |
| P37109 | VDREVPVSAEKQVFSRMPIC  | Negative |
| P37109 | AEKQVFSRMPICEHMTESPD  | Negative |
| P37109 | VFSRMPICEHMTESPDCSI   | Negative |
| P37109 | DREVPVSAEKQVFSRMPICE  | Negative |
| P37109 | QVFSRMPICEHMTESPDCSR  | Negative |
| P37109 | VPVSAEKQVFSRMPICEHMT  | Negative |
| P37109 | LALAALFIVDREVPVSAEKQ  | Negative |
| P37109 | ALALAALFIVDREVPVSAEK  | Negative |
| P37109 | KQVFSRMPICEHMTESPDCS  | Negative |
| P37109 | EKQVFSRMPICEHMTESPDC  | Negative |
| P37109 | PVSAEKQVFSRMPICEHMTES | Negative |
| P37109 | WVVALALAALFIVDREVPVS  | Negative |
| P37109 | VVALALAALFIVDREVPVSA  | Negative |
| P37109 | SAEKQVFSRMPICEHMTESP  | Negative |
| P37109 | ALFIVDREVPVSAEKQVFSR  | Negative |
| P37109 | FIVDREVPVSAEKQVFSRMP  | Negative |
| P37109 | VSAEKQVFSRMPICEHMTES  | Negative |
| P37109 | RLWVVALALAALFIVDREVP  | Negative |
| P37109 | VALALAALFIVDREVPVSAE  | Negative |
| P37240 | MCVPTDYTLYEERRECDFCV  | Negative |
| P37240 | SVAMYGLLCLLFSQAVPMCV  | Negative |
| P37240 | CLLFSQAVPMCVPTDYTLYE  | Negative |
| P37240 | QAVPMCVPTDYTLYEERREC  | Negative |
| P37240 | AVPMCVPTDYTLYEERRECD  | Negative |
| P37240 | VPMCVPTDYTLYEERRECD   | Negative |
| P37240 | MYGLLCLLFSQAVPMCVPTD  | Negative |
| P37240 | YTLYEERRECDFCVAINTTI  | Negative |
| P37240 | VPTDYTLYEERRECDFCVAI  | Negative |
| P37240 | GLLCLLFSQAVPMCVPTDYT  | Negative |
| P37240 | YEERRECDFCVAINTTICMG  | Negative |
| P37240 | YGLLCLLFSQAVPMCVPTDY  | Negative |
| P37240 | PTDYTLYEERRECDFCVAIN  | Negative |
| P37240 | PMCVPTDYTLYEERRECDFC  | Negative |
| P37240 | TDYTLYEERRECDFCVAINT  | Negative |
| P37240 | LYEERRECDFCVAINTTICM  | Negative |

|        |                        |          |
|--------|------------------------|----------|
| P37240 | VAMYGLLCLLFSQAVPMCVP   | Negative |
| P37240 | SQAVPMCVPPTYDYTYEERRE  | Negative |
| P37240 | CVPTYDYTYEERRECDFCVA   | Negative |
| P37240 | LCLLFSQAVPMCVPPTYDYTY  | Negative |
| P37240 | DYTYEERRECDFCVAINTT    | Negative |
| P37240 | MELSVAMYGLLCLLFSQAVP   | Negative |
| P37240 | LFSQAVPMCVPPTYDYTYEER  | Negative |
| P37240 | TYEERRECDFCVAINTTIC    | Negative |
| P37240 | FSQAVPMCVPPTYDYTYEERR  | Negative |
| P37240 | LSVAMYGLLCLLFSQAVPMC   | Negative |
| P37240 | LLCLLFSQAVPMCVPPTYDYTL | Negative |
| P37240 | LLFSQAVPMCVPPTYDYTYEE  | Negative |
| P37240 | ELSVAMYGLLCLLFSQAVPM   | Negative |
| P37329 | SFAVAGNALADEGKITVFAA   | Negative |
| P37329 | KITVFAAASLTNAMQDIATQ   | Negative |
| P37329 | AVAGNALADEGKITVFAAAS   | Negative |
| P37329 | ARKWLNLFAGAALSFAVAGN   | Negative |
| P37329 | ADEGKITVFAAASLTNAMQD   | Negative |
| P37329 | LSFAVAGNALADEGKITVFA   | Negative |
| P37329 | RKWLNLFAGAALSFAVAGNA   | Negative |
| P37329 | DEGKITVFAAASLTNAMQDI   | Negative |
| P37329 | TVFAAASLTNAMQDIATQFK   | Negative |
| P37329 | GNALADEGKITVFAAASLTN   | Negative |
| P37329 | LADEGKITVFAAASLTNAMQ   | Negative |
| P37329 | LNLFGAALSFAVAGNALAD    | Negative |
| P37329 | FAVAGNALADEGKITVFAAA   | Negative |
| P37329 | NALADEGKITVFAAASLTNA   | Negative |
| P37329 | AGNALADEGKITVFAAASLT   | Negative |
| P37329 | LFAGAALSFAVAGNALADEG   | Negative |
| P37329 | AALSFAVAGNALADEGKITV   | Negative |
| P37329 | GAALSFAVAGNALADEGKIT   | Negative |
| P37329 | NLFGAALSFAVAGNALADE    | Negative |
| P37329 | EGKITVFAAASLTNAMQDIA   | Negative |
| P37329 | GKITVFAAASLTNAMQDIAT   | Negative |
| P37329 | MARKWLNLFAGAALSFAVAG   | Negative |
| P37329 | FAGAALSFAVAGNALADEGK   | Negative |
| P37329 | ITVFAAASLTNAMQDIATQF   | Negative |
| P37329 | ALADEGKITVFAAASLTNAM   | Negative |
| P37329 | ALSFAVAGNALADEGKITVF   | Negative |
| P37329 | WLNLFAGAALSFAVAGNALA   | Negative |
| P37329 | VAGNALADEGKITVFAAASL   | Negative |
| P37329 | KWLNLFAGAALSFAVAGNAL   | Negative |
| P37387 | ILLTLCTSLLLTNVAHAKE    | Negative |
| P37387 | KNILLTLCTSLLLTNVAHA    | Negative |
| P37387 | AAHAKEVKIGMAIDDLRLER   | Negative |
| P37387 | LCTSLLLTNVAHAKEVKIG    | Negative |

|        |                        |          |
|--------|------------------------|----------|
| P37387 | IKNILLTLCTSLLLTNVAAH   | Negative |
| P37387 | LTLCTSLLLTNVAAHAK EVK  | Negative |
| P37387 | MAIDDLRLERWQKDRDIFVK   | Negative |
| P37387 | LTNVAAHAK EVKIGMAIDDL  | Negative |
| P37387 | VAAHAK EVKIGMAIDDLRLE  | Negative |
| P37387 | EVKIGMAIDDLRLERWQKDR   | Negative |
| P37387 | TSLLL TNVAAHAK EVKIGMA | Negative |
| P37387 | KEVKIGMAIDDLRLERWQKD   | Negative |
| P37387 | TNVAAHAK EVKIGMAIDDLR  | Negative |
| P37387 | LLL TNVAAHAK EVKIGMAID | Negative |
| P37387 | NVAAHAK EVKIGMAIDDLRL  | Negative |
| P37387 | KIKNILLTLCTSLLLTNVAA   | Negative |
| P37387 | CTSLLL TNVAAHAK EVKIGM | Negative |
| P37387 | KIGMAIDDLRLERWQKDRDI   | Negative |
| P37387 | MKIKNILLTLCTSLLLTNVA   | Negative |
| P37387 | HAK EVKIGMAIDDLRLERWQ  | Negative |
| P37387 | AHAK EVKIGMAIDDLRLERW  | Negative |
| P37387 | NILLTLCTSLLLTNVAAHAK   | Negative |
| P37387 | VKIGMAIDDLRLERWQKDRD   | Negative |
| P37387 | LLTLCTSLLL TNVAAHAK EV | Negative |
| P37387 | SLLL TNVAAHAK EVKIGMAI | Negative |
| P37387 | LL TNVAAHAK EVKIGMAIDD | Negative |
| P37387 | GMAIDDLRLERWQKDRDIFV   | Negative |
| P37387 | AK EVKIGMAIDDLRLERWQK  | Negative |
| P37387 | IGMAIDDLRLERWQKDRDIF   | Negative |
| P37648 | LAGGLMMATAGYVQADALQ    | Negative |
| P37648 | ALQPDPAWQQGTLSNGLQWQ   | Negative |
| P37648 | AGYVQADALQPDPAWQQGTL   | Negative |
| P37648 | IRLLAGGLMMATAGYVQAD    | Negative |
| P37648 | GGLMMATAGYVQADALQPD    | Negative |
| P37648 | LLMMATAGYVQADALQPDPA   | Negative |
| P37648 | MATAGYVQADALQPDPAWQQ   | Negative |
| P37648 | RLLAGGLMMATAGYVQADA    | Negative |
| P37648 | KIRLLAGGLMMATAGYVQA    | Negative |
| P37648 | GTKIRLLAGGLMMATAGYV    | Negative |
| P37648 | YVQADALQPDPAWQQGTLSN   | Negative |
| P37648 | TAGYVQADALQPDPAWQQGT   | Negative |
| P37648 | MQGTKIRLLAGGLMMATAG    | Negative |
| P37648 | GGLMMATAGYVQADALQPD    | Negative |
| P37648 | QGTKIRLLAGGLMMATAGY    | Negative |
| P37648 | PDPAWQQGTLSNGLQWQVLT   | Negative |
| P37648 | LMMATAGYVQADALQPDPAW   | Negative |
| P37648 | QADALQPDPAWQQGTLSNGL   | Negative |
| P37648 | LQPDPAWQQGTLSNGLQWQV   | Negative |
| P37648 | LLAGGLMMATAGYVQADAL    | Negative |
| P37648 | GYVQADALQPDPAWQQGTLS   | Negative |

|        |                       |          |
|--------|-----------------------|----------|
| P37648 | QPDPAWQQGTLSNGLQWQVL  | Negative |
| P37648 | ATAGYVQADALQPDPAWQQG  | Negative |
| P37648 | TKIRLLAGGLMMATAGYVQ   | Negative |
| P37648 | DPAWQQGTLSNGLQWQVLTT  | Negative |
| P37648 | DALQPDPAWQQGTLSNGLQW  | Negative |
| P37648 | VQADALQPDPAWQQGTLSNG  | Negative |
| P37648 | MMATAGYVQADALQPDPAWQ  | Negative |
| P37648 | ADALQPDPAWQQGTLSNGLQ  | Negative |
| P37696 | APDAVAQQWAIKRAKYLRPS  | Negative |
| P37696 | VLSSTGAFADPAPDAVAQQW  | Negative |
| P37696 | SVMAAMGGAQVLSSTGAFAD  | Negative |
| P37696 | VAQQWAIKRAKYLRPSGRVV  | Negative |
| P37696 | AAMGGAQVLSSTGAFADPAP  | Negative |
| P37696 | AVAQQWAIKRAKYLRPSGRV  | Negative |
| P37696 | PDAVAQQWAIKRAKYLRPSG  | Negative |
| P37696 | MGGAQVLSSTGAFADPAPDA  | Negative |
| P37696 | GAFADPAPDAVAQQWAIKRA  | Negative |
| P37696 | AFADPAPDAVAQQWAIKRAK  | Negative |
| P37696 | VMAAMGGAQVLSSTGAFADP  | Negative |
| P37696 | QQWAIKRAKYLRPSGRVVDT  | Negative |
| P37696 | MAAMGGAQVLSSTGAFADPA  | Negative |
| P37696 | DPAPDAVAQQWAIKRAKYLR  | Negative |
| P37696 | ADPAPDAVAQQWAIKRAKYL  | Negative |
| P37696 | SSTGAFADPAPDAVAQQWAI  | Negative |
| P37696 | GAQVLSSTGAFADPAPDAVA  | Negative |
| P37696 | MSVMAAMGGAQVLSSTGAFA  | Negative |
| P37696 | GGAQVLSSTGAFADPAPDAV  | Negative |
| P37696 | AQQWAIKRAKYLRPSGRVVD  | Negative |
| P37696 | QVLSSTGAFADPAPDAVAQQ  | Negative |
| P37696 | DAVAQQWAIKRAKYLRPSGR  | Negative |
| P37696 | PAPDAVAQQWAIKRAKYLRP  | Negative |
| P37696 | TGAFADPAPDAVAQQWAIKRA | Negative |
| P37696 | LSSTGAFADPAPDAVAQQWA  | Negative |
| P37696 | STGAFADPAPDAVAQQWAIK  | Negative |
| P37696 | FADPAPDAVAQQWAIKRAKY  | Negative |
| P37696 | AQVLSSTGAFADPAPDAVAQ  | Negative |
| P37696 | QWAIKRAKYLRPSGRVVDTG  | Negative |
| P37699 | SLVMAAIFSVSIISTAIASS  | Negative |
| P37699 | MAAIFSVSIISTAIASSAAD  | Negative |
| P37699 | LVMAAIFSVSIISTAIASSA  | Negative |
| P37699 | KGSSLKRFKSLVMAAIFSVS  | Negative |
| P37699 | VMAAIFSVSIISTAIASSAA  | Negative |
| P37699 | AAIFSVSIISTAIASSAADQ  | Negative |
| P37699 | STAIASSAADQIPFPYDAKY  | Negative |
| P37699 | MIKGSSLKRFKSLVMAAIFS  | Negative |
| P37699 | KRFKSLVMAAIFSVSIISTA  | Negative |

|        |                      |          |
|--------|----------------------|----------|
| P37699 | AIASSAADQIPFPYDAKYPN | Negative |
| P37699 | LKRFKSLVMAAIFSVSIIST | Negative |
| P37699 | RFKSLVMAAIFSVSIISTAI | Negative |
| P37699 | VSIISTAIASSAADQIPFPY | Negative |
| P37699 | SSAADQIPFPYDAKYPNGAY | Negative |
| P37699 | SLKRFKSLVMAAIFSVSIIS | Negative |
| P37699 | IKGSSLKRFKSLVMAAIFSV | Negative |
| P37699 | FKSLVMAAIFSVSIISTAIA | Negative |
| P37699 | ASSAADQIPFPYDAKYPNGA | Negative |
| P37699 | AIFSVSIISTAIASSAADQI | Negative |
| P37699 | IISTAIASSAADQIPFPYDA | Negative |
| P37699 | IASSAADQIPFPYDAKYPNG | Negative |
| P37699 | KSLVMAAIFSVSIISTAIAS | Negative |
| P37699 | SVSIISTAIASSAADQIPFP | Negative |
| P37699 | ISTAIASSAADQIPFPYDAK | Negative |
| P37699 | SSLKRFKSLVMAAIFSVSII | Negative |
| P37699 | SIISTAIASSAADQIPFPYD | Negative |
| P37699 | GSSLKRFKSLVMAAIFSVSI | Negative |
| P37699 | FSVSIISTAIASSAADQIPF | Negative |
| P37699 | TAIASSAADQIPFPYDAKYP | Negative |
| P37726 | IAATSFGALAQGGGAVEGEL | Negative |
| P37726 | TLGFAIGSIIAATSFGALAQ | Negative |
| P37726 | NTLGFAIGSIIAATSFGALA | Negative |
| P37726 | KLKNTLGFAIGSIIAATSFG | Negative |
| P37726 | VEGELFYKKQYNDSVKHIED | Negative |
| P37726 | MKLKNTLGFAIGSIIAATSF | Negative |
| P37726 | GFAIGSIIAATSFGALAQGG | Negative |
| P37726 | KNTLGFAIGSIIAATSFGAL | Negative |
| P37726 | LAQQGGAVEGELFYKKQYND | Negative |
| P37726 | TSFGALAQGGGAVEGELFYK | Negative |
| P37726 | AATSFGALAQGGGAVEGELF | Negative |
| P37726 | IIAATSFGALAQGGGAVEGE | Negative |
| P37726 | SIIAATSFGALAQGGGAVEG | Negative |
| P37726 | SFGALAQGGGAVEGELFYKK | Negative |
| P37726 | GAVEGELFYKKQYNDSVKHI | Negative |
| P37726 | GSIIAATSFGALAQGGGAVE | Negative |
| P37726 | AVEGELFYKKQYNDSVKHIE | Negative |
| P37726 | ALAQGGGAVEGELFYKKQYN | Negative |
| P37726 | FAIGSIIAATSFGALAQGGG | Negative |
| P37726 | ATSFGALAQGGGAVEGELFY | Negative |
| P37726 | GALAQGGGAVEGELFYKKQY | Negative |
| P37726 | GQGAVEGELFYKKQYNDSVK | Negative |
| P37726 | IGSIIAATSFGALAQGGGAV | Negative |
| P37726 | QQGGAVEGELFYKKQYNDSV | Negative |
| P37726 | LGFAIGSIIAATSFGALAQG | Negative |
| P37726 | QGAVEGELFYKKQYNDSVKH | Negative |

|        |                       |          |
|--------|-----------------------|----------|
| P37726 | LKNTLGFAIGSIIAATSFGA  | Negative |
| P37726 | FGALAQGGQGAVEGELFYKKQ | Negative |
| P37726 | AQQQGAVEGELFYKKQYND   | Negative |
| P37735 | TRRILGALVGATALSLALSV  | Negative |
| P37735 | LSLALSVPALAEPIVIKFSH  | Negative |
| P37735 | EPIVIKFSHVVPDTPKGKG   | Negative |
| P37735 | LVGATALSLALSVPALAEPI  | Negative |
| P37735 | RILGALVGATALSLALSVPA  | Negative |
| P37735 | SVPALAEPIVIKFSHVVPD   | Negative |
| P37735 | SLALSVPALAEPIVIKFSHV  | Negative |
| P37735 | RRILGALVGATALSLALSV   | Negative |
| P37735 | VIKFSHVVPDTPKGKGA     | Negative |
| P37735 | ALVGATALSLALSVPALAEP  | Negative |
| P37735 | MLTRRILGALVGATALSLAL  | Negative |
| P37735 | ALSVPALAEPIVIKFSHVVA  | Negative |
| P37735 | ATALSLALSVPALAEPIVIK  | Negative |
| P37735 | GALVGATALSLALSVPALAE  | Negative |
| P37735 | ILGALVGATALSLALSVPAL  | Negative |
| P37735 | LAEPIVIKFSHVVPDTPKG   | Negative |
| P37735 | ALAEPIVIKFSHVVPDTPK   | Negative |
| P37735 | VGATALSLALSVPALAEPIV  | Negative |
| P37735 | AEPIVIKFSHVVPDTPKGK   | Negative |
| P37735 | VPALAEPIVIKFSHVVPDTP  | Negative |
| P37735 | IVIKFSHVVPDTPKGKGAA   | Negative |
| P37735 | LALSVPALAEPIVIKFSHV   | Negative |
| P37735 | PIVIKFSHVVPDTPKGKGA   | Negative |
| P37735 | LTRRILGALVGATALSLALS  | Negative |
| P37735 | LSVPALAEPIVIKFSHVVP   | Negative |
| P37735 | TALSLALSVPALAEPIVIK   | Negative |
| P37735 | ALSLALSVPALAEPIVIKFS  | Negative |
| P37735 | PALAEPIVIKFSHVVPDTP   | Negative |
| P37735 | LGALVGATALSLALSVPALA  | Negative |
| P37889 | ALTPSPSMAVPWQDCTGAEC  | Negative |
| P37889 | MLLQESAGVWLALALVTALT  | Negative |
| P37889 | AGVWLALALVTALTTPSPSMA | Negative |
| P37889 | VTALTTPSPSMAVPWQDCTGA | Negative |
| P37889 | QESAGVWLALALVTALTTPSP | Negative |
| P37889 | QDCTGAECPLLENCIEEAL   | Negative |
| P37889 | WLALALVTALTTPSPSMAVPW | Negative |
| P37889 | VWLALALVTALTTPSPSMAVP | Negative |
| P37889 | VPWQDCTGAECPLLENCIEE  | Negative |
| P37889 | MAVPWQDCTGAECPLLENCI  | Negative |
| P37889 | LQESAGVWLALALVTALTTPS | Negative |
| P37889 | WQDCTGAECPLLENCIEEAL  | Negative |
| P37889 | LALVTALTTPSPSMAVPWQDC | Negative |
| P37889 | ALVTALTTPSPSMAVPWQDCT | Negative |

|        |                      |          |
|--------|----------------------|----------|
| P37889 | LTPSPSMAVPWQDCTGAECP | Negative |
| P37889 | LLQESAGVWLALALVTALTP | Negative |
| P37889 | PSMAVPWQDCTGAECPLLEN | Negative |
| P37889 | TALTPSPSMAVPWQDCTGAE | Negative |
| P37889 | SMAVPWQDCTGAECPLLENC | Negative |
| P37889 | SAGVWLALALVTALTPSPSM | Negative |
| P37889 | LVTALTPSPSMAVPWQDCTG | Negative |
| P37889 | SPSMAVPWQDCTGAECPLLE | Negative |
| P37889 | GVWLALALVTALTPSPSMAV | Negative |
| P37889 | TPSPSMAVPWQDCTGAECPL | Negative |
| P37889 | AVPWQDCTGAECPLLENCIE | Negative |
| P37889 | PSPSMAVPWQDCTGAECPLL | Negative |
| P37889 | PWQDCTGAECPLLENCIEEA | Negative |
| P37889 | ESAGVWLALALVTALTPSPS | Negative |
| P37889 | LALALVTALTPSPSMAVPWQ | Negative |
| P37902 | LSAGLAQADDAAPAAGSTLD | Negative |
| P37902 | PATAILALALSAGLAQADDA | Negative |
| P37902 | PAAGSTLDKIAKNGVIVVGH | Negative |
| P37902 | LRKPATAILALALSAGLAQA | Negative |
| P37902 | KPATAILALALSAGLAQADD | Negative |
| P37902 | ATAILALALSAGLAQADDAA | Negative |
| P37902 | LAQADDAAPAAGSTLDKIAK | Negative |
| P37902 | AAPAAGSTLDKIAKNGVIVV | Negative |
| P37902 | GSTLDKIAKNGVIVVGHRES | Negative |
| P37902 | AGLAQADDAAPAAGSTLDKI | Negative |
| P37902 | AAGSTLDKIAKNGVIVVGHR | Negative |
| P37902 | GLAQADDAAPAAGSTLDKIA | Negative |
| P37902 | AQADDAAPAAGSTLDKIAKN | Negative |
| P37902 | RKPATAILALALSAGLAQAD | Negative |
| P37902 | LALSAGLAQADDAAPAAGST | Negative |
| P37902 | DAAPAAGSTLDKIAKNGVIV | Negative |
| P37902 | DDAAPAAGSTLDKIAKNGVI | Negative |
| P37902 | MQLRKPATAILALALSAGLA | Negative |
| P37902 | LALALSAGLAQADDAAPAAG | Negative |
| P37902 | ILALALSAGLAQADDAAPAA | Negative |
| P37902 | ALSAGLAQADDAAPAAGSTL | Negative |
| P37902 | AGSTLDKIAKNGVIVVGHRE | Negative |
| P37902 | ALALSAGLAQADDAAPAAGS | Negative |
| P37902 | SAGLAQADDAAPAAGSTLDK | Negative |
| P37902 | QLRKPATAILALALSAGLAQ | Negative |
| P37902 | QADDAAPAAGSTLDKIAKNG | Negative |
| P37902 | AILALALSAGLAQADDAAPA | Negative |
| P37902 | ADDAAPAAGSTLDKIAKNGV | Negative |
| P37902 | APAAGSTLDKIAKNGVIVVG | Negative |
| P37921 | TSTIASLMFVAGAAVAADPT | Negative |
| P37921 | FVAGAAVAADPTPVSVSGGT | Negative |



|        |                       |          |
|--------|-----------------------|----------|
| P37921 | ASLMFVAGAAVAADPTPVSV  | Negative |
| P37921 | ADPTPVSVSGGTIHFEGLV   | Negative |
| P37921 | AAVAADPTPVSVSGGTIHFE  | Negative |
| P37921 | PTPVSVSGGTIHFEGLVNA   | Negative |
| P37921 | PVSVSGGTIHFEGLVNAAC   | Negative |
| P37921 | VSGGTIHFEGLVNAACAVS   | Negative |
| P37921 | VAADPTPVSVSGGTIHFEGLK | Negative |
| P37921 | TPVSVSGGTIHFEGLVNAA   | Negative |
| P37921 | MFVAGAAVAADPTPVSVSGG  | Negative |
| P37921 | TIASLMFVAGAAVAADPTPV  | Negative |
| P37921 | KHKLMTSTIASLMFVAGAAV  | Negative |
| P37921 | VSVSGGTIHFEGLVNAACA   | Negative |
| P37921 | HKLMTSTIASLMFVAGAAVA  | Negative |
| P37921 | VAGAAVAADPTPVSVSGGTI  | Negative |
| P37921 | LMFVAGAAVAADPTPVSVSG  | Negative |
| P37921 | MKHKLMTSTIASLMFVAGAA  | Negative |
| P37921 | GAAVAADPTPVSVSGGTIHF  | Negative |
| P37921 | SVSGGTIHFEGLVNAACAV   | Negative |
| P37921 | AADPTPVSVSGGTIHFEGLK  | Negative |
| P37921 | MTSTIASLMFVAGAAVAADP  | Negative |
| P37921 | IASLMFVAGAAVAADPTPVSV | Negative |
| P37921 | KLMTSTIASLMFVAGAAVAA  | Negative |
| P37921 | LMTSTIASLMFVAGAAVAAD  | Negative |
| P37921 | AGAAVAADPTPVSVSGGTIH  | Negative |
| P37921 | SLMFVAGAAVAADPTPVSVS  | Negative |
| P37921 | AVAADPTPVSVSGGTIHFEGL | Negative |
| P37921 | DPTPVSVSGGTIHFEGLVN   | Negative |
| P38008 | TLQFRRFTFSDREIQFVLDP  | Negative |
| P38008 | ACLSFFYLSTISILQANETD  | Negative |
| P38008 | LSFACLSFFYLSTISILQAN  | Negative |
| P38008 | DTLQFRRFTFSDREIQFVLD  | Negative |
| P38008 | QANETDTLQFRRFTFSDREI  | Negative |
| P38008 | FYLSTISILQANETDTLQFR  | Negative |
| P38008 | NETDTLQFRRFTFSDREIQF  | Negative |
| P38008 | ILQANETDTLQFRRFTFSDR  | Negative |
| P38008 | RTSLSFACLSFFYLSTISIL  | Negative |
| P38008 | STISILQANETDTLQFRRFT  | Negative |
| P38008 | KRTSLSFACLSFFYLSTISI  | Negative |
| P38008 | YLSTISILQANETDTLQFRR  | Negative |
| P38008 | SFFYLSTISILQANETDTLQ  | Negative |
| P38008 | TISILQANETDTLQFRRFTF  | Negative |
| P38008 | SLSFACLSFFYLSTISILQA  | Negative |
| P38008 | SILQANETDTLQFRRFTFSD  | Negative |
| P38008 | MIKRTSLSFACLSFFYLSTI  | Negative |
| P38008 | ANETDTLQFRRFTFSDREIQ  | Negative |
| P38008 | LSFFYLSTISILQANETDTL  | Negative |

|        |                      |          |
|--------|----------------------|----------|
| P38008 | ISILQANETDTLQFRRFTFS | Negative |
| P38008 | FFYLSTISILQANETDTLQF | Negative |
| P38008 | LSTISILQANETDTLQFRRF | Negative |
| P38008 | ETDTLQFRRFTFSREIQFV  | Negative |
| P38008 | TSLSFACLSFFYLSTISILQ | Negative |
| P38008 | IKRTSLSFACLSFFYLSTIS | Negative |
| P38008 | FACLSFFYLSTISILQANET | Negative |
| P38008 | TDTLQFRRFTFSREIQFVL  | Negative |
| P38008 | SFACLSFFYLSTISILQANE | Negative |
| P38008 | LQANETDTLQFRRFTFSRE  | Negative |
| P38029 | GCAVQETHATAHDEEHLQEP | Negative |
| P38029 | SSVPWCLLLLGLCCLVPSS  | Negative |
| P38029 | SLAEDLQGCAVQETHATAHD | Negative |
| P38029 | CCLVPSSLAEDLQGCAVQET | Negative |
| P38029 | LLAGLCCLVPSSLAEDLQGC | Negative |
| P38029 | LAEDLQGCAVQETHATAHDE | Negative |
| P38029 | CLVPSSLAEDLQGCAVQETH | Negative |
| P38029 | MPSSVPWCLLLLGLCCLVP  | Negative |
| P38029 | SVPWCLLLLGLCCLVPSSL  | Negative |
| P38029 | AEDLQGCAVQETHATAHDEE | Negative |
| P38029 | WCLLLLGLCCLVPSSLAED  | Negative |
| P38029 | LVPSSLAEDLQGCAVQETHA | Negative |
| P38029 | GLCCLVPSSLAEDLQGCAVQ | Negative |
| P38029 | LCCLVPSSLAEDLQGCAVQE | Negative |
| P38029 | AGLCCLVPSSLAEDLQGCAV | Negative |
| P38029 | PSSVPWCLLLLGLCCLVPS  | Negative |
| P38029 | CAVQETHATAHDEEHLQEP  | Negative |
| P38029 | CLLLLGLCCLVPSSLAEDL  | Negative |
| P38029 | PWCLLLLGLCCLVPSSLAE  | Negative |
| P38029 | DLQGCAVQETHATAHDEEHL | Negative |
| P38029 | SSLAEDLQGCAVQETHATAH | Negative |
| P38029 | LQGCAVQETHATAHDEEHLQ | Negative |
| P38029 | VPWCLLLLGLCCLVPSSLA  | Negative |
| P38029 | LLLGLCCLVPSSLAEDLQ   | Negative |
| P38029 | LAGLCCLVPSSLAEDLQGCA | Negative |
| P38029 | PSSLAEDLQGCAVQETHATA | Negative |
| P38029 | VPSSLAEDLQGCAVQETHAT | Negative |
| P38029 | QGCAVQETHATAHDEEHLQE | Negative |
| P38029 | EDLQGCAVQETHATAHDEEH | Negative |
| P38059 | MKKNLRIVSAAAAALLAVAP | Negative |
| P38059 | MPVNAATTINADSAINANTN | Negative |
| P38059 | TAMPVNAATTINADSAINAN | Negative |
| P38059 | AVAPIAATAMPVNAATTINA | Negative |
| P38059 | AATAMPVNAATTINADSAIN | Negative |
| P38059 | NAATTINADSAINANTNAKY | Negative |
| P38059 | APIAATAMPVNAATTINADS | Negative |

|        |                      |          |
|--------|----------------------|----------|
| P38059 | AAAALLAVAPIAATAMPVNA | Negative |
| P38059 | KKNLRIVSAAAAALLAVAPI | Negative |
| P38059 | LRIVSAAAAALLAVAPIAAT | Negative |
| P38059 | NLRIVSAAAAALLAVAPIAA | Negative |
| P38059 | VAPIAATAMPVNAATTINAD | Negative |
| P38059 | PIAATAMPVNAATTINADSA | Negative |
| P38059 | AALLAVAPIAATAMPVNAAT | Negative |
| P38059 | AAALLAVAPIAATAMPVNAA | Negative |
| P38059 | AMPVNAATTINADSAINANT | Negative |
| P38059 | SAAAAALLAVAPIAATAMPV | Negative |
| P38059 | IVSAAAAALLAVAPIAATAM | Negative |
| P38059 | PVNAATTINADSAINANTNA | Negative |
| P38059 | ALLAVAPIAATAMPVNAATT | Negative |
| P38059 | RIVSAAAAALLAVAPIAATA | Negative |
| P38059 | LLAVAPIAATAMPVNAATTI | Negative |
| P38059 | KNLRIVSAAAAALLAVAPIA | Negative |
| P38059 | AAAAALLAVAPIAATAMPVN | Negative |
| P38059 | VNAATTINADSAINANTNAK | Negative |
| P38059 | VSAAAAALLAVAPIAATAMP | Negative |
| P38059 | ATAMPVNAATTINADSAINA | Negative |
| P38059 | IAATAMPVNAATTINADSAI | Negative |
| P38059 | AATTINADSAINANTNAKYD | Negative |
| P38368 | MKKTAIALVVAGLAAASVAQ | Negative |
| P38368 | YAGVKAGQASFHDGLRALAR | Negative |
| P38368 | AQAAPQENTFYAGVKAGQAS | Negative |
| P38368 | ENTFYAGVKAGQASFHDGLR | Negative |
| P38368 | APQENTFYAGVKAGQASFHD | Negative |
| P38368 | QENTFYAGVKAGQASFHDGL | Negative |
| P38368 | AASVAQAAPQENTFYAGVKA | Negative |
| P38368 | AGLAAASVAQAAPQENTFYA | Negative |
| P38368 | VVAGLAAASVAQAAPQENTF | Negative |
| P38368 | NTFYAGVKAGQASFHDGLRA | Negative |
| P38368 | AAPQENTFYAGVKAGQASFH | Negative |
| P38368 | LVVAGLAAASVAQAAPQENT | Negative |
| P38368 | ASVAQAAPQENTFYAGVKAG | Negative |
| P38368 | QAAPQENTFYAGVKAGQASF | Negative |
| P38368 | TAIALVVAGLAAASVAQAAP | Negative |
| P38368 | IALVVAGLAAASVAQAAPQE | Negative |
| P38368 | AAASVAQAAPQENTFYAGVK | Negative |
| P38368 | AIALVVAGLAAASVAQAAPQ | Negative |
| P38368 | AGVKAGQASFHDGLRALARE | Negative |
| P38368 | VAGLAAASVAQAAPQENTFY | Negative |
| P38368 | GLAAASVAQAAPQENTFYAG | Negative |
| P38368 | KTAIALVVAGLAAASVAQAA | Negative |
| P38368 | FYAGVKAGQASFHDGLRALA | Negative |
| P38368 | SVAQAAPQENTFYAGVKAGQ | Negative |

|        |                       |          |
|--------|-----------------------|----------|
| P38368 | VAQAAPQENTFYAGVKAGQA  | Negative |
| P38368 | PQENTFYAGVKAGQASFHDG  | Negative |
| P38368 | KKTAIALVVAGLAAASVAQA  | Negative |
| P38368 | LAAASVAQAAPQENTFYAGV  | Negative |
| P38368 | TFYAGVKAGQASFHDGLRAL  | Negative |
| P38538 | VYTRGGEHKVMKKVVNSVLA  | Negative |
| P38538 | STNIPQEQFVYTRGGEHKVM  | Negative |
| P38538 | EQFVYTRGGEHKVMKKVVNS  | Negative |
| P38538 | DRSTNIPQEQFVYTRGGEHK  | Negative |
| P38538 | KKDRSTNIPQEQFVYTRGGE  | Negative |
| P38538 | GEHKVMKKVVNSVLASALAI  | Negative |
| P38538 | GGEHKVMKKVVNSVLASALA  | Negative |
| P38538 | QFVYTRGGEHKVMKKVVNSV  | Negative |
| P38538 | HKVMKKVVNSVLASALAITV  | Negative |
| P38538 | DSGFKKKDRSTNIPQEQFVY  | Negative |
| P38538 | RSTNIPQEQFVYTRGGEHKV  | Negative |
| P38538 | KDRSTNIPQEQFVYTRGGEH  | Negative |
| P38538 | GFKKKDRSTNIPQEQFVYTR  | Negative |
| P38538 | IPQEQFVYTRGGEHKVMKKV  | Negative |
| P38538 | QEQFVYTRGGEHKVMKKVVN  | Negative |
| P38538 | YTRGGEHKVMKKVVNSVLAS  | Negative |
| P38538 | EHKVMKKVVNSVLASALAIT  | Negative |
| P38538 | KVMKKVVNSVLASALAITVA  | Negative |
| P38538 | FKKKDRSTNIPQEQFVYTRG  | Negative |
| P38538 | TNIPQEQFVYTRGGEHKVMK  | Negative |
| P38538 | MQDSGFKKKDRSTNIPQEQF  | Negative |
| P38538 | SGFKKKDRSTNIPQEQFVYT  | Negative |
| P38538 | QDSGFKKKDRSTNIPQEQFV  | Negative |
| P38538 | KKKDRSTNIPQEQFVYTRGG  | Negative |
| P38538 | FVYTRGGEHKVMKKVVNSVL  | Negative |
| P38538 | PQEQFVYTRGGEHKVMKKVV  | Negative |
| P38538 | RGGEHKVMKKVVNSVLASAL  | Negative |
| P38538 | NIPQEQFVYTRGGEHKVMKK  | Negative |
| P38538 | TRGGEHKVMKKVVNSVLASA  | Negative |
| P38538 | VMKKVVNSVLASALAITVAP  | Negative |
| P38540 | YDGQNCKEPGNCWENKPGYP  | Negative |
| P38540 | ASVFAVSNQALAYDGQNCKE  | Negative |
| P38540 | NQALAYDGQNCKEPGNCWEN  | Negative |
| P38540 | GQNCKEPGNCWENKPGYPEK  | Negative |
| P38540 | LASVFAVSNQALAYDGQNCCK | Negative |
| P38540 | SNQALAYDGQNCKEPGNCWE  | Negative |
| P38540 | KEPGNCWENKPGYPEKIAGS  | Negative |
| P38540 | TLLALASVFAVSNQALAYDG  | Negative |
| P38540 | MKHVLTLLALASVFAVSNQA  | Negative |
| P38540 | VSNQALAYDGQNCKEPGNCW  | Negative |
| P38540 | FAVSNQALAYDGQNCKEPGN  | Negative |

|        |                      |          |
|--------|----------------------|----------|
| P38540 | KHVLTLALASVFAVSNQAL  | Negative |
| P38540 | DGQNCKEPGNCWENKPGYPE | Negative |
| P38540 | QNCKEPGNCWENKPGYPEKI | Negative |
| P38540 | VLTLALASVFAVSNQALAY  | Negative |
| P38540 | SVFAVSNQALAYDGQNCKEP | Negative |
| P38540 | AYDGQNCKEPGNCWENKPGY | Negative |
| P38540 | ALASVFAVSNQALAYDGQNC | Negative |
| P38540 | LAYDGQNCKEPGNCWENKPG | Negative |
| P38540 | AVSNQALAYDGQNCKEPGNC | Negative |
| P38540 | LLALASVFAVSNQALAYDGQ | Negative |
| P38540 | NCKEPGNCWENKPGYPEKIA | Negative |
| P38540 | LTLLALASVFAVSNQALAYD | Negative |
| P38540 | CKEPGNCWENKPGYPEKIA  | Negative |
| P38540 | ALAYDGQNCKEPGNCWENKP | Negative |
| P38540 | HVLTLALASVFAVSNQALA  | Negative |
| P38540 | EPGNCWENKPGYPEKIA    | Negative |
| P38540 | QALAYDGQNCKEPGNCWENK | Negative |
| P38540 | VFAVSNQALAYDGQNCKEPG | Negative |
| P38577 | VGGKYYGNGVHCTKSGCSVN | Negative |
| P38577 | GVHCTKSGCSVNWGEAASAG | Negative |
| P38577 | EAYQQLDNQNLKKVVGKYY  | Negative |
| P38577 | LKKVVGKYYGNGVHCTKSG  | Negative |
| P38577 | TNMKSVEAYQQLDNQNLKKV | Negative |
| P38577 | KVVVGKYYGNGVHCTKSGCS | Negative |
| P38577 | LDNQNLKKVVVGKYYGNGVH | Negative |
| P38577 | KSVEAYQQLDNQNLKKVVG  | Negative |
| P38577 | YYGNGVHCTKSGCSVNWGEA | Negative |
| P38577 | GKYYGNGVHCTKSGCSVNW  | Negative |
| P38577 | KKVVVGKYYGNGVHCTKSGC | Negative |
| P38577 | NQNLKKVVVGKYYGNGVHCT | Negative |
| P38577 | NLKKVVVGKYYGNGVHCTKS | Negative |
| P38577 | NGVHCTKSGCSVNWGEAASA | Negative |
| P38577 | SVEAYQQLDNQNLKKVVGGK | Negative |
| P38577 | VEAYQQLDNQNLKKVVGGKY | Negative |
| P38577 | DNQNLKKVVVGKYYGNGVHC | Negative |
| P38577 | KYYGNGVHCTKSGCSVNWGE | Negative |
| P38577 | GGKYYGNGVHCTKSGCSVNW | Negative |
| P38577 | NMKSVEAYQQLDNQNLKKVV | Negative |
| P38577 | AYQQLDNQNLKKVVVGKYYG | Negative |
| P38577 | MKSVEAYQQLDNQNLKKVVG | Negative |
| P38577 | QLDNQNLKKVVVGKYYGNGV | Negative |
| P38577 | QNLKKVVVGKYYGNGVHCTK | Negative |
| P38577 | VVGKYYGNGVHCTKSGCSV  | Negative |
| P38577 | YGNGVHCTKSGCSVNWGEAA | Negative |
| P38577 | QQLDNQNLKKVVVGKYYGNG | Negative |
| P38577 | GNGVHCTKSGCSVNWGEAAS | Negative |

|        |                       |          |
|--------|-----------------------|----------|
| P38577 | MTNMKSVEAYQQLDNQNKK   | Negative |
| P38660 | ARLGFLVSVCTFFLAASGLY  | Negative |
| P38660 | SSSDDVIELTPSNFNREVIQ  | Negative |
| P38660 | GLVSVCTFFLAASGLYSSSD  | Negative |
| P38660 | LYSSSDDVIELTPSNFNREV  | Negative |
| P38660 | LVSVCTFFLAASGLYSSSDV  | Negative |
| P38660 | ELTPSNFNREVIQSNLWL    | Negative |
| P38660 | TFFLAASGLYSSSDDVIELT  | Negative |
| P38660 | LTPSNFNREVIQSNLWLVE   | Negative |
| P38660 | IELTPSNFNREVIQSNLWL   | Negative |
| P38660 | FLAASGLYSSSDDVIELTPS  | Negative |
| P38660 | DVIELTPSNFNREVIQSNL   | Negative |
| P38660 | SGLYSSSDDVIELTPSNFNR  | Negative |
| P38660 | CTFFLAASGLYSSSDDVIEL  | Negative |
| P38660 | FGLVSVCTFFLAASGLYSSD  | Negative |
| P38660 | SSSDDVIELTPSNFNREVIQ  | Negative |
| P38660 | LGFLVSVCTFFLAASGLYSS  | Negative |
| P38660 | VSVCTFFLAASGLYSSSDVI  | Negative |
| P38660 | RLGFLVSVCTFFLAASGLYS  | Negative |
| P38660 | SDDVIELTPSNFNREVIQSN  | Negative |
| P38660 | SCTFFLAASGLYSSSDDVIE  | Negative |
| P38660 | ASGLYSSSDDVIELTPSNFN  | Negative |
| P38660 | LAASGLYSSSDDVIELTPSN  | Negative |
| P38660 | DDVIELTPSNFNREVIQSN   | Negative |
| P38660 | GLYSSSDDVIELTPSNFNRE  | Negative |
| P38660 | FFLAASGLYSSSDDVIELTP  | Negative |
| P38660 | AASGLYSSSDDVIELTPSNF  | Negative |
| P38660 | YSSSDDVIELTPSNFNREVI  | Negative |
| P38660 | VIELTPSNFNREVIQSNLW   | Negative |
| P38660 | MARLGFLVSVCTFFLAASGL  | Negative |
| P38683 | LPAFSADNLLRWHDQAQHTV  | Negative |
| P38683 | FSADNLLRWHDQAQHTVQAS  | Negative |
| P38683 | FLLSLFMLPAFSADNLLRW   | Negative |
| P38683 | PAFSADNLLRWHDQAQHTVQ  | Negative |
| P38683 | ADNLLRWHDQAQHTVQASTP  | Negative |
| P38683 | DAQHTVQASTPLKAKRAWK   | Negative |
| P38683 | SLFMLPAFSADNLLRWHDQA  | Negative |
| P38683 | LLSLFMLPAFSADNLLRWHD  | Negative |
| P38683 | FMLPAFSADNLLRWHDQAQHF | Negative |
| P38683 | SADNLLRWHDQAQHTVQAST  | Negative |
| P38683 | LSFMLPAFSADNLLRWHDQA  | Negative |
| P38683 | AQHTVQASTPLKAKRAWKL   | Negative |
| P38683 | WHDQAQHTVQASTPLKAKRA  | Negative |
| P38683 | LLRWHDQAQHTVQASTPLKA  | Negative |
| P38683 | VLLFLLSLFMLPAFSADNL   | Negative |
| P38683 | NLLRWHDQAQHTVQASTPLK  | Negative |

|        |                      |          |
|--------|----------------------|----------|
| P38683 | LLLSLFMLPAFSADNLLRWH | Negative |
| P38683 | DNLLRWHDAQHFTVQASTPL | Negative |
| P38683 | LRWHDAQHFTVQASTPLKAK | Negative |
| P38683 | QHFTVQASTPLKAKRAWKLC | Negative |
| P38683 | HDAQHFTVQASTPLKAKRAW | Negative |
| P38683 | MRVLLFLLLSLFMLPAFSAD | Negative |
| P38683 | MLPAFSADNLLRWHDAQHFT | Negative |
| P38683 | HFTVQASTPLKAKRAWKLCA | Negative |
| P38683 | RVLLFLLLSLFMLPAFSADN | Negative |
| P38683 | LFMLPAFSADNLLRWHDAQH | Negative |
| P38683 | AFSADNLLRWHDAQHFTVQA | Negative |
| P38683 | RWHDAQHFTVQASTPLKAKR | Negative |
| P38683 | LFLLLSLFMLPAFSADNLLR | Negative |
| P39042 | PATAVTKPTIAAVGGYAMNN | Negative |
| P39042 | AGTLGATPATAVTKPTIAAV | Negative |
| P39042 | RAAATVITTGALLAAGTLGA | Negative |
| P39042 | ATPATAVTKPTIAAVGGYAM | Negative |
| P39042 | GALLAAGTLGATPATAVTKP | Negative |
| P39042 | TLGATPATAVTKPTIAAVGG | Negative |
| P39042 | VITTGALLAAGTLGATPATA | Negative |
| P39042 | ATAVTKPTIAAVGGYAMNNG | Negative |
| P39042 | MRLRRAAATVITTGALLAAG | Negative |
| P39042 | TPATAVTKPTIAAVGGYAMN | Negative |
| P39042 | ITTGALLAAGTLGATPATAV | Negative |
| P39042 | AAATVITTGALLAAGTLGAT | Negative |
| P39042 | LGATPATAVTKPTIAAVGGY | Negative |
| P39042 | AVTKPTIAAVGGYAMNNGTG | Negative |
| P39042 | TTGALLAAGTLGATPATAVT | Negative |
| P39042 | LLAAGTLGATPATAVTKPTI | Negative |
| P39042 | TGALLAAGTLGATPATAVTK | Negative |
| P39042 | TAVTKPTIAAVGGYAMNNGT | Negative |
| P39042 | TVITTGALLAAGTLGATPAT | Negative |
| P39042 | VTKPTIAAVGGYAMNNGTGT | Negative |
| P39042 | ATVITTGALLAAGTLGATPA | Negative |
| P39042 | GATPATAVTKPTIAAVGGYA | Negative |
| P39042 | LRRAAATVITTGALLAAGTL | Negative |
| P39042 | RRAAATVITTGALLAAGTLG | Negative |
| P39042 | GTLGATPATAVTKPTIAAVG | Negative |
| P39042 | LAAGTLGATPATAVTKPTIA | Negative |
| P39042 | AAGTLGATPATAVTKPTIAA | Negative |
| P39042 | AATVITTGALLAAGTLGATP | Negative |
| P39042 | RLRRAAATVITTGALLAAGT | Negative |
| P39045 | SPEPLRPRRTGGRGGARRAA | Negative |
| P39045 | LVTIPLLPMTLLGASPALAD | Negative |
| P39045 | QSSPEPLRPRRTGGRGGARR | Negative |
| P39045 | IPLLPMTLLGASPALADASG | Negative |

|        |                      |          |
|--------|----------------------|----------|
| P39045 | GARRAAALVTIPLLPMTLLG | Negative |
| P39045 | GGRGGARRAAALVTIPLPM  | Negative |
| P39045 | RPRRTGGRGGARRAAALVTI | Negative |
| P39045 | RTGGRGGARRAAALVTIPLL | Negative |
| P39045 | RAAALVTIPLLPMTLLGASP | Negative |
| P39045 | VTIPLLPMTLLGASPALADA | Negative |
| P39045 | SSPELRPRRTGGRGGARRA  | Negative |
| P39045 | PLRPRRTGGRGGARRAAALV | Negative |
| P39045 | EPLRPRRTGGRGGARRAAAL | Negative |
| P39045 | AAALVTIPLLPMTLLGASPA | Negative |
| P39045 | RRTGGRGGARRAAALVTIPL | Negative |
| P39045 | KQSSPELRPRRTGGRGGAR  | Negative |
| P39045 | GRGGARRAAALVTIPLLPMT | Negative |
| P39045 | PRRTGGRGGARRAAALVTIP | Negative |
| P39045 | LRPRRTGGRGGARRAAALVT | Negative |
| P39045 | MKQSSPELRPRRTGGRGGA  | Negative |
| P39045 | AALVTIPLLPMTLLGASPAL | Negative |
| P39045 | RGGARRAAALVTIPLLPMTL | Negative |
| P39045 | GGARRAAALVTIPLLPMTLL | Negative |
| P39045 | RRAAALVTIPLLPMTLLGAS | Negative |
| P39045 | TIPLLPMTLLGASPALADAS | Negative |
| P39045 | TGGRGGARRAAALVTIPLLP | Negative |
| P39045 | PEPLRPRRTGGRGGARRAAA | Negative |
| P39045 | ALVTIPLLPMTLLGASPALA | Negative |
| P39045 | PLLPMTLLGASPALADASGA | Negative |
| P39045 | ARRAAALVTIPLLPMTLLGA | Negative |
| P39046 | GTAMVGCSVAAPLIQPQVD  | Negative |
| P39046 | SAALVGTAMVGCSVAAPLIQ | Negative |
| P39046 | LVGTAMVGCSVAAPLIQPQV | Negative |
| P39046 | VGTAMVGCSVAAPLIQPQV  | Negative |
| P39046 | RLNETKRFRKVKRSAALVGT | Negative |
| P39046 | RRRLNETKRFRKVKRSAALV | Negative |
| P39046 | ALVGTAMVGCSVAAPLIQPV | Negative |
| P39046 | KRFRKVKRSAALVGTAMVGC | Negative |
| P39046 | IARKERRRLNETKRFRKVKR | Negative |
| P39046 | LNETKRFRKVKRSAALVGTA | Negative |
| P39046 | TKRFRKVKRSAALVGTAMVG | Negative |
| P39046 | TAMVGCSVAAPLIQPQVDA  | Negative |
| P39046 | RFRKVKRSAALVGTAMVGCS | Negative |
| P39046 | RRLNETKRFRKVKRSAALVG | Negative |
| P39046 | KRSAALVGTAMVGCSVAAPL | Negative |
| P39046 | FRKVKRSAALVGTAMVGCSV | Negative |
| P39046 | ETKRFRKVKRSAALVGTAMV | Negative |
| P39046 | NETKRFRKVKRSAALVGTAM | Negative |
| P39046 | NIARKERRRLNETKRFRKVK | Negative |
| P39046 | MENIARKERRRLNETKRFRK | Negative |



|        |                      |          |
|--------|----------------------|----------|
| P39046 | ARKERRRLNETKRFRKVKRS | Negative |
| P39046 | AALVGTAMVGCSVAAPLIQP | Negative |
| P39046 | ERRRLNETKRFRKVKRSAAL | Negative |
| P39046 | RKVKRSAALVGTAMVGCSVA | Negative |
| P39046 | ENIARKERRRLNETKRFRKV | Negative |
| P39046 | RKERRRLNETKRFRKVKRSA | Negative |
| P39046 | VKRSAALVGTAMVGCSVAAP | Negative |
| P39046 | KVKRSAALVGTAMVGCSVAA | Negative |
| P39046 | KERRRLNETKRFRKVKRSAA | Negative |
| P39046 | RSAALVGTAMVGCSVAAPLI | Negative |
| P39049 | SLAIVSSMSYAGVEFSNPSG | Negative |
| P39049 | SSLAIVSSMSYAGVEFSNPS | Negative |
| P39049 | GQLGEPANYTQFANILSASE | Negative |
| P39049 | FSNPSGQLGEPANYTQFANI | Negative |
| P39049 | IVSSMSYAGVEFSNPSGQLG | Negative |
| P39049 | QLGEPANYTQFANILSASEL | Negative |
| P39049 | AIVSSMSYAGVEFSNPSGQL | Negative |
| P39049 | SMSYAGVEFSNPSGQLGEPA | Negative |
| P39049 | VSSMSYAGVEFSNPSGQLGE | Negative |
| P39049 | MIKSNLVISSLAIVSSMSYA | Negative |
| P39049 | ISSLAIVSSMSYAGVEFSNP | Negative |
| P39049 | GVEFSNPSGQLGEPANYTQF | Negative |
| P39049 | VISSLAIVSSMSYAGVEFSN | Negative |
| P39049 | SGQLGEPANYTQFANILSAS | Negative |
| P39049 | SYAGVEFSNPSGQLGEPANY | Negative |
| P39049 | NLVISSLAIVSSMSYAGVEF | Negative |
| P39049 | AGVEFSNPSGQLGEPANYTQ | Negative |
| P39049 | NPSGQLGEPANYTQFANILS | Negative |
| P39049 | SSMSYAGVEFSNPSGQLGEP | Negative |
| P39049 | EFNPSGQLGEPANYTQFAN  | Negative |
| P39049 | PSGQLGEPANYTQFANILSA | Negative |
| P39049 | MSYAGVEFSNPSGQLGEPAN | Negative |
| P39049 | KSNLVISSLAIVSSMSYAGV | Negative |
| P39049 | YAGVEFSNPSGQLGEPANYT | Negative |
| P39049 | IKSNLVISSLAIVSSMSYAG | Negative |
| P39049 | LAIVSSMSYAGVEFSNPSGQ | Negative |
| P39049 | SNLVISSLAIVSSMSYAGVE | Negative |
| P39049 | VEFSNPSGQLGEPANYTQFA | Negative |
| P39049 | SNPSGQLGEPANYTQFANIL | Negative |
| P39099 | VGLTLSASFQAVASIPGQVA | Negative |
| P39099 | QLLSALALSVGLTLSASFQA | Negative |
| P39099 | LSASFQAVASIPGQVADQAP | Negative |
| P39099 | SALALSVGLTLSASFQAVAS | Negative |
| P39099 | MKKQTQLLSALALSVGLTLS | Negative |
| P39099 | ASIPGQVADQAPLPSLAPML | Negative |
| P39099 | LSALALSVGLTLSASFQAVA | Negative |

|        |                      |          |
|--------|----------------------|----------|
| P39099 | ALSVGLTLSASFQAVASIPG | Negative |
| P39099 | KKQTQLLSALALSVGLTLA  | Negative |
| P39099 | VASIPGQVADQAPLPSLAPM | Negative |
| P39099 | SASFQAVASIPGQVADQAPL | Negative |
| P39099 | TLSASFQAVASIPGQVADQA | Negative |
| P39099 | PGQVADQAPLPSLAPMLEKV | Negative |
| P39099 | IPGQVADQAPLPSLAPMLEK | Negative |
| P39099 | LALSVGLTLSASFQAVASIP | Negative |
| P39099 | FQAVASIPGQVADQAPLPSL | Negative |
| P39099 | SFQAVASIPGQVADQAPLPS | Negative |
| P39099 | GLTLSASFQAVASIPGQVAD | Negative |
| P39099 | QAVASIPGQVADQAPLPSLA | Negative |
| P39099 | QTQLLSALALSVGLTLSASF | Negative |
| P39099 | SVGLTLSASFQAVASIPGQV | Negative |
| P39099 | ALALSVGLTLSASFQAVASI | Negative |
| P39099 | KQTQLLSALALSVGLTLSAS | Negative |
| P39099 | AVASIPGQVADQAPLPSLAP | Negative |
| P39099 | LLSALALSVGLTLSASFQAV | Negative |
| P39099 | SIPGQVADQAPLPSLAPMLE | Negative |
| P39099 | TQLLSALALSVGLTLSASFQ | Negative |
| P39099 | ASFQAVASIPGQVADQAPLP | Negative |
| P39099 | LTLSASFQAVASIPGQVADQ | Negative |
| P39116 | KKVMLATALFLGLTPAGANA | Negative |
| P39116 | AGANAADLGHQTLGSNDGWG | Negative |
| P39116 | TPAGANAADLGHQTLGSNDG | Negative |
| P39116 | LGLTPAGANAADLGHQTLGS | Negative |
| P39116 | LGHQTLGSNDGWGAYSTGTT | Negative |
| P39116 | VMLATALFLGLTPAGANAAD | Negative |
| P39116 | DLGHQTLGSNDGWGAYSTGT | Negative |
| P39116 | GHQTLGSNDGWGAYSTGTTG | Negative |
| P39116 | FLGLTPAGANAADLGHQTLG | Negative |
| P39116 | KVMLATALFLGLTPAGANAA | Negative |
| P39116 | GSNDGWGAYSTGTTGGSKAS | Negative |
| P39116 | GLTPAGANAADLGHQTLGSN | Negative |
| P39116 | LFLGLTPAGANAADLGHQTL | Negative |
| P39116 | HQTLGSNDGWGAYSTGTTGG | Negative |
| P39116 | LATALFLGLTPAGANAADLG | Negative |
| P39116 | QTLGSNDGWGAYSTGTTGGS | Negative |
| P39116 | ALFLGLTPAGANAADLGHQT | Negative |
| P39116 | PAGANAADLGHQTLGSNDGW | Negative |
| P39116 | LGSNDGWGAYSTGTTGGSKA | Negative |
| P39116 | AADLGHQTLGSNDGWGAYST | Negative |
| P39116 | MLATALFLGLTPAGANAADL | Negative |
| P39116 | GANAADLGHQTLGSNDGWGA | Negative |
| P39116 | ADLGHQTLGSNDGWGAYSTG | Negative |
| P39116 | LTPAGANAADLGHQTLGSND | Negative |

|        |                      |          |
|--------|----------------------|----------|
| P39116 | TALFLGLTPAGANAADLGHQ | Negative |
| P39116 | TLGSNDGWGAYSTGTTGGSK | Negative |
| P39116 | NAADLGHQTLGSNDGWGAYS | Negative |
| P39116 | MKKVMLATALFLGLTPAGAN | Negative |
| P39116 | ANAADLGHQTLGSNDGWGAY | Negative |
| P39172 | LWGGATQAADAAVVASLKPV | Negative |
| P39172 | AALWGGATQAADAAVVASLK | Negative |
| P39172 | VVASLKPVGFIAIAIDGVT  | Negative |
| P39172 | GATQAADAAVVASLKPVGFI | Negative |
| P39172 | TLLFAALSAALWGGATQAAD | Negative |
| P39172 | KTLLFAALSAALWGGATQAA | Negative |
| P39172 | KKTLLFAALSAALWGGATQA | Negative |
| P39172 | FAALSAALWGGATQAADAAV | Negative |
| P39172 | VASLKPVGFIAIAIDGVTE  | Negative |
| P39172 | ALWGGATQAADAAVVASLKP | Negative |
| P39172 | QAADAAVVASLKPVGFIAIA | Negative |
| P39172 | ASLKPVGFIAIAIDGVTE   | Negative |
| P39172 | DAAVVASLKPVGFIAIAID  | Negative |
| P39172 | WGGATQAADAAVVASLKPVG | Negative |
| P39172 | ADAAVVASLKPVGFIAIAIA | Negative |
| P39172 | AAVVASLKPVGFIAIAIDG  | Negative |
| P39172 | AADAAVVASLKPVGFIAIAI | Negative |
| P39172 | ALSAALWGGATQAADAAVVA | Negative |
| P39172 | ATQAADAAVVASLKPVGFIA | Negative |
| P39172 | GGATQAADAAVVASLKPVGF | Negative |
| P39172 | MLHKKTLLFAALSAALWGA  | Negative |
| P39172 | AALSAALWGGATQAADAAVV | Negative |
| P39172 | LFAALSAALWGGATQAADAA | Negative |
| P39172 | LHKKTLLFAALSAALWGGAT | Negative |
| P39172 | SAALWGGATQAADAAVVASL | Negative |
| P39172 | HKKTLLFAALSAALWGGATQ | Negative |
| P39172 | AVVASLKPVGFIAIAIDGV  | Negative |
| P39172 | TQAADAAVVASLKPVGFIAI | Negative |
| P39172 | LLFAALSAALWGGATQAADA | Negative |
| P39176 | FALLFASHTSLAVTYPLPPE | Negative |
| P39176 | VNILCSFALLFASHTSLAVT | Negative |
| P39176 | SLAVTYPLPPEGSRLVGQSF | Negative |
| P39176 | NILCSFALLFASHTSLAVTY | Negative |
| P39176 | PPEGSRLVGQSFTVTVPDHN | Negative |
| P39176 | TYPLPPEGSRLVGQSFTVTV | Negative |
| P39176 | CSFALLFASHTSLAVTYPLP | Negative |
| P39176 | PEGSRLVGQSFTVTVPDHNT | Negative |
| P39176 | GSRLVGQSFTVTVPDHNTQP | Negative |
| P39176 | EGSRLVGQSFTVTVPDHNTQ | Negative |
| P39176 | SFALLFASHTSLAVTYPLPP | Negative |
| P39176 | LFASHTSLAVTYPLPPEGSR | Negative |

|        |                      |          |
|--------|----------------------|----------|
| P39176 | RRVNILCSFALLFASHTSLA | Negative |
| P39176 | HTSLAVTYPLPPEGSRLVGQ | Negative |
| P39176 | ALLFASHTSLAVTYPLPPEG | Negative |
| P39176 | ASHTSLAVTYPLPPEGSRLV | Negative |
| P39176 | YPLPPEGSRLVGQSFTVTVP | Negative |
| P39176 | ILCSFALLFASHTSLAVTYP | Negative |
| P39176 | LAVTYPLPPEGSRLVGQSFT | Negative |
| P39176 | LPPEGSRLVGQSFTVTVPDH | Negative |
| P39176 | AVTYPLPPEGSRLVGQSFTV | Negative |
| P39176 | FASHTSLAVTYPLPPEGSRL | Negative |
| P39176 | PLPPEGSRLVGQSFTVTVPD | Negative |
| P39176 | LLFASHTSLAVTYPLPPEGS | Negative |
| P39176 | MRRVNILCSFALLFASHTSL | Negative |
| P39176 | TSLAVTYPLPPEGSRLVGQS | Negative |
| P39176 | SHTSLAVTYPLPPEGSRLVG | Negative |
| P39176 | RVNILCSFALLFASHTSLAV | Negative |
| P39176 | VTYPLPPEGSRLVGQSFTVT | Negative |
| P39180 | YRLVWNHMTGAFVVASELAR | Negative |
| P39180 | HLNTCYRLVWNHMTGAFVVA | Negative |
| P39180 | LVWNHMTGAFVVASELARAR | Negative |
| P39180 | MTGAFVVASELARARGKRGG | Negative |
| P39180 | LARARGKRGGVAVALSLAAV | Negative |
| P39180 | TCYRLVWNHMTGAFVVASEL | Negative |
| P39180 | ARARGKRGGVAVALSLAAVT | Negative |
| P39180 | HMTGAFVVASELARARGKRG | Negative |
| P39180 | TGAFVVASELARARGKRGGV | Negative |
| P39180 | AFVVASELARARGKRGGVAV | Negative |
| P39180 | FVVASELARARGKRGGVAVA | Negative |
| P39180 | ELARARGKRGGVAVALSLAA | Negative |
| P39180 | RHLNTCYRLVWNHMTGAFVV | Negative |
| P39180 | RARGKRGGVAVALSLAAVTS | Negative |
| P39180 | SELARARGKRGGVAVALSLA | Negative |
| P39180 | WNHMTGAFVVASELARARGK | Negative |
| P39180 | KRHLNTCYRLVWNHMTGAFV | Negative |
| P39180 | RLVWNHMTGAFVVASELARA | Negative |
| P39180 | CYRLVWNHMTGAFVVASELA | Negative |
| P39180 | VVASELARARGKRGGVAVAL | Negative |
| P39180 | VWNHMTGAFVVASELARARG | Negative |
| P39180 | GAFVVASELARARGKRGGVA | Negative |
| P39180 | NHMTGAFVVASELARARGKR | Negative |
| P39180 | ASELARARGKRGGVAVALSL | Negative |
| P39180 | MKRHLNTCYRLVWNHMTGAF | Negative |
| P39180 | ARGKRGGVAVALSLAAVTSL | Negative |
| P39180 | RGKRGGVAVALSLAAVTSLP | Negative |
| P39180 | LNTCYRLVWNHMTGAFVVAS | Negative |
| P39180 | VASELARARGKRGGVAVALS | Negative |

|        |                      |          |
|--------|----------------------|----------|
| P39180 | NTCYRLVWNHMTGAFVVASE | Negative |
| P39186 | ALAMQAIFFPAPARAQGLVD | Negative |
| P39186 | LAALAMQAIFFPAPARAQGL | Negative |
| P39186 | SLLAVCAVLLAALAMQAIFF | Negative |
| P39186 | LLAVCAVLLAALAMQAIFFP | Negative |
| P39186 | FPAPARAQGLVDAMRGPTAI | Negative |
| P39186 | AMQAIFFPAPARAQGLVDAM | Negative |
| P39186 | PAPARAQGLVDAMRGPTAIA | Negative |
| P39186 | VCAVLLAALAMQAIFFPAPA | Negative |
| P39186 | LLAALAMQAIFFPAPARAQG | Negative |
| P39186 | AVLLAALAMQAIFFPAPARA | Negative |
| P39186 | ASLLAVCAVLLAALAMQAI  | Negative |
| P39186 | MQAIFFPAPARAQGLVDAMR | Negative |
| P39186 | CAVLLAALAMQAIFFPAPAR | Negative |
| P39186 | SWASLLAVCAVLLAALAMQA | Negative |
| P39186 | AALAMQAIFFPAPARAQGLV | Negative |
| P39186 | LAVCAVLLAALAMQAIFFPA | Negative |
| P39186 | APARAQGLVDAMRGPTAIAN | Negative |
| P39186 | WASLLAVCAVLLAALAMQAI | Negative |
| P39186 | KPSRSWASLLAVCAVLLAAL | Negative |
| P39186 | QAIFFPAPARAQGLVDAMRG | Negative |
| P39186 | AIFFPAPARAQGLVDAMRGP | Negative |
| P39186 | RSWASLLAVCAVLLAALAMQ | Negative |
| P39186 | VLLAALAMQAIFFPAPARAQ | Negative |
| P39186 | AVCAVLLAALAMQAIFFPAP | Negative |
| P39186 | FFPAPARAQGLVDAMRGPTA | Negative |
| P39186 | MKPSRSWASLLAVCAVLLAA | Negative |
| P39186 | SRSWASLLAVCAVLLAALAM | Negative |
| P39186 | IFFPAPARAQGLVDAMRGPT | Negative |
| P39186 | PSRSWASLLAVCAVLLAALA | Negative |
| P39187 | CLLLPMMASAHQFETGQRP  | Negative |
| P39187 | HQFETGQRPPIGITDRGEL  | Negative |
| P39187 | LLLPMMASAHQFETGQRP   | Negative |
| P39187 | TGQRPPIGITDRGELVLDK  | Negative |
| P39187 | ETGQRPPIGITDRGELVLD  | Negative |
| P39187 | RVPPIGITDRGELVLDKDQF | Negative |
| P39187 | QRVPPIGITDRGELVLDKDQ | Negative |
| P39187 | GQRPPIGITDRGELVLDKD  | Negative |
| P39187 | LPMMASAHQFETGQRPPIG  | Negative |
| P39187 | LTCLLLPMMASAHQFETGQR | Negative |
| P39187 | ASAHQFETGQRPPIGITDR  | Negative |
| P39187 | RKILALTCLLLPMMASAHQF | Negative |
| P39187 | MASAHQFETGQRPPIGITD  | Negative |
| P39187 | QFETGQRPPIGITDRGELV  | Negative |
| P39187 | LALTCLLLPMMASAHQFETG | Negative |
| P39187 | AHQFETGQRPPIGITDRGE  | Negative |

|        |                      |          |
|--------|----------------------|----------|
| P39187 | LRKILALTCLLLPMMASAHQ | Negative |
| P39187 | MTLRKILALTCLLLPMMASA | Negative |
| P39187 | SAHQFETGQRVPPIGITDRG | Negative |
| P39187 | PPIGITDRGELVLDKDQFSY | Negative |
| P39187 | LLPMMASAHQFETGQRVPI  | Negative |
| P39187 | TCLLLPMMASAHQFETGQRV | Negative |
| P39187 | KILALTCLLLPMMASAHQFE | Negative |
| P39187 | FETGQRVPPIGITDRGELVL | Negative |
| P39187 | MMASAHQFETGQRVPPIGIT | Negative |
| P39187 | TLRKILALTCLLLPMMASAH | Negative |
| P39187 | VPPIGITDRGELVLDKDQFS | Negative |
| P39187 | ALTCLLLPMMASAHQFETGQ | Negative |
| P39187 | PMMASAHQFETGQRVPPIGI | Negative |
| P39325 | LIVSAVSAAMSSMALAAPLT | Negative |
| P39325 | MALAAPLTVGFSQVGSESGW | Negative |
| P39325 | SAAMSSMALAAPLTVGFSQV | Negative |
| P39325 | WKRLIVSAVSAAMSSMALA  | Negative |
| P39325 | KRLIVSAVSAAMSSMALAA  | Negative |
| P39325 | AVSAAMSSMALAAPLTVGFS | Negative |
| P39325 | AMSSMALAAPLTVGFSQVGS | Negative |
| P39325 | PLTVGFSQVGSESGWRAAET | Negative |
| P39325 | TVGFSQVGSESGWRAAETNV | Negative |
| P39325 | LLIVSAVSAAMSSMALAAPL | Negative |
| P39325 | AAPLTVGFSQVGSESGWRAA | Negative |
| P39325 | SSMALAAPLTVGFSQVGSES | Negative |
| P39325 | RLLIVSAVSAAMSSMALAAP | Negative |
| P39325 | SQVGSESGWRAAETNVAKSE | Negative |
| P39325 | MWKRLIVSAVSAAMSSMAL  | Negative |
| P39325 | GFSQVGSESGWRAAETNVAK | Negative |
| P39325 | ALAAPLTVGFSQVGSESGWR | Negative |
| P39325 | LTVGFSQVGSESGWRAAETN | Negative |
| P39325 | VSAAMSSMALAAPLTVGFSQ | Negative |
| P39325 | LAAPLTVGFSQVGSESGWRA | Negative |
| P39325 | MSSMALAAPLTVGFSQVGSE | Negative |
| P39325 | FSQVGSESGWRAAETNVAKS | Negative |
| P39325 | SAVSAAMSSMALAAPLTVGF | Negative |
| P39325 | VSAVSAAMSSMALAAPLTVG | Negative |
| P39325 | VGFSQVGSESGWRAAETNVA | Negative |
| P39325 | QVGSESGWRAAETNVAKSEA | Negative |
| P39325 | AAMSSMALAAPLTVGFSQVG | Negative |
| P39325 | SMALAAPLTVGFSQVGSESG | Negative |
| P39325 | APLTVGFSQVGSESGWRAAE | Negative |
| P39653 | VLSVSAGTTHADELANQTAK | Negative |
| P39653 | GTTHADELANQTAKVADEAS | Negative |
| P39653 | HADELANQTAKVADEASIVV | Negative |
| P39653 | IVLSVSAGTTHADELANQTA | Negative |

|        |                      |          |
|--------|----------------------|----------|
| P39653 | RMLSFPSMLFLLAFGIVLSV | Negative |
| P39653 | MLSFPSMLFLLAFGIVLSVS | Negative |
| P39653 | FGIVLSVSAGTTHADELANQ | Negative |
| P39653 | LFLLAFGIVLSVSAGTTHAD | Negative |
| P39653 | AGTTHADELANQTAKVADEA | Negative |
| P39653 | VSAGTTHADELANQTAKVAD | Negative |
| P39653 | LLAFGIVLSVSAGTTHADEL | Negative |
| P39653 | NRMLSFPSMLFLLAFGIVLS | Negative |
| P39653 | GIVLSVSAGTTHADELANQT | Negative |
| P39653 | MLFLLAFGIVLSVSAGTTHA | Negative |
| P39653 | THADELANQTAKVADEASIV | Negative |
| P39653 | MNNRMLSFPSMLFLLAFGIV | Negative |
| P39653 | SAGTTHADELANQTAKVADE | Negative |
| P39653 | SFPSMLFLLAFGIVLSVSAG | Negative |
| P39653 | LAFGIVLSVSAGTTHADELA | Negative |
| P39653 | TTHADELANQTAKVADEASI | Negative |
| P39653 | LSFPSMLFLLAFGIVLSVSA | Negative |
| P39653 | PSMLFLLAFGIVLSVSAGTT | Negative |
| P39653 | LSVSAGTTHADELANQTAKV | Negative |
| P39653 | SVSAGTTHADELANQTAKVA | Negative |
| P39653 | FPSMLFLLAFGIVLSVSAGT | Negative |
| P39653 | ADELANQTAKVADEASIVVS | Negative |
| P39653 | NNRMLSFPSMLFLLAFGIVL | Negative |
| P39653 | SMLFLLAFGIVLSVSAGTTH | Negative |
| P39653 | FLLAFGIVLSVSAGTTHADE | Negative |
| P39824 | GFTPPFNSTHAEAKSIEDTN | Negative |
| P39824 | CVGLLCLSITGFTPPFNSTH | Negative |
| P39824 | FTPPFNSTHAEAKSIEDTNM | Negative |
| P39824 | SITGFTPPFNSTHAEAKSIE | Negative |
| P39824 | TGFTPPFNSTHAEAKSIEDT | Negative |
| P39824 | LLCLSITGFTPPFNSTHAEA | Negative |
| P39824 | PPFNSTHAEAKSIEDTNMAS | Negative |
| P39824 | FGICVGLLCLSITGFTPPFN | Negative |
| P39824 | FFNSTHAEAKSIEDTNMASC | Negative |
| P39824 | ICVGLLCLSITGFTPPFNST | Negative |
| P39824 | LSITGFTPPFNSTHAEAKSI | Negative |
| P39824 | ASIKFGICVGLLCLSITGFT | Negative |
| P39824 | CLSITGFTPPFNSTHAEAKS | Negative |
| P39824 | KTKASIKFGICVGLLCLSIT | Negative |
| P39824 | LKTKASIKFGICVGLLCLSI | Negative |
| P39824 | GLLCLSITGFTPPFNSTHAE | Negative |
| P39824 | TKASIKFGICVGLLCLSITG | Negative |
| P39824 | GICVGLLCLSITGFTPPFNS | Negative |
| P39824 | SIKFGICVGLLCLSITGFTP | Negative |
| P39824 | KFGICVGLLCLSITGFTPPF | Negative |
| P39824 | FNSTHAEAKSIEDTNMASCI | Negative |

|        |                      |          |
|--------|----------------------|----------|
| P39824 | KASIKFGICVGLLCLSITGF | Negative |
| P39824 | LCLSITGFTPFNSTHAEAK  | Negative |
| P39824 | KLKTKASIKFGICVGLLCLS | Negative |
| P39824 | VGLLCLSITGFTPFNSTHA  | Negative |
| P39824 | MKLKTKASIKFGICVGLLCL | Negative |
| P39824 | IKFGICVGLLCLSITGFTPF | Negative |
| P39824 | NSTHAEAKSIEDTNMASCIT | Negative |
| P39824 | TPFFNSTHAEAKSIEDTNMA | Negative |
| P39844 | VLLLFVVASVPYMHQAALAA | Negative |
| P39844 | VASVPYMHQAALAAEKQDAL | Negative |
| P39844 | YVAVLLLFVVASVPYMHQAA | Negative |
| P39844 | KLYVAVLLLFVVASVPYMHQ | Negative |
| P39844 | ALAAEKQDALSGQIDKILAD | Negative |
| P39844 | MKKSILYVAVLLLFVVASV  | Negative |
| P39844 | SIKLYVAVLLLFVVASVPYM | Negative |
| P39844 | LFVVASVPYMHQAALAAEKQ | Negative |
| P39844 | ASVPYMHQAALAAEKQDALS | Negative |
| P39844 | KKSIKLYVAVLLLFVVASVP | Negative |
| P39844 | VVASVPYMHQAALAAEKQDA | Negative |
| P39844 | AVLLLFVVASVPYMHQAALA | Negative |
| P39844 | IKLYVAVLLLFVVASVPYMH | Negative |
| P39844 | MHQAALAAEKQDALSGQIDK | Negative |
| P39844 | LLLFVVASVPYMHQAALAAE | Negative |
| P39844 | AEKQDALSGQIDKILADHPA | Negative |
| P39844 | SVPYMHQAALAAEKQDALSG | Negative |
| P39844 | VAVLLLFVVASVPYMHQAAL | Negative |
| P39844 | LAAEKQDALSGQIDKILADH | Negative |
| P39844 | KSIKLYVAVLLLFVVASVPY | Negative |
| P39844 | YMHQAALAAEKQDALSGQID | Negative |
| P39844 | AAEKQDALSGQIDKILADHP | Negative |
| P39844 | LYVAVLLLFVVASVPYMHQA | Negative |
| P39844 | HQAALAAEKQDALSGQIDKI | Negative |
| P39844 | QAALAAEKQDALSGQIDKIL | Negative |
| P39844 | LLFVVASVPYMHQAALAAEK | Negative |
| P39844 | AALAAEKQDALSGQIDKILA | Negative |
| P39844 | PYMHQAALAAEKQDALSGQI | Negative |
| P39844 | VPYMHQAALAAEKQDALSGQ | Negative |
| P39848 | MSGSAQAAAYTDYSLYKVEP | Negative |
| P39848 | YTDYSLYKVEPSNTFSTESQ | Negative |
| P39848 | QAAAYTDYSLYKVEPSNTFS | Negative |
| P39848 | LAFFAMSGSAQAAAYTDYSL | Negative |
| P39848 | MKKRLIAPMLLSAASLAFFA | Negative |
| P39848 | APMLLSAASLAFFAMSGSAQ | Negative |
| P39848 | AFFAMSGSAQAAAYTDYSLY | Negative |
| P39848 | SAASLAFFAMSGSAQAAAYT | Negative |
| P39848 | KKRLIAPMLLSAASLAFFAM | Negative |



|        |                       |          |
|--------|-----------------------|----------|
| P39848 | ASLAFFAMSGSAQAAAYTDY  | Negative |
| P39848 | MLLSAASLAFFAMSGSAQAA  | Negative |
| P39848 | FAMSGSAQAAAYTDYSLYKV  | Negative |
| P39848 | SLAFFAMSGSAQAAAYTDYS  | Negative |
| P39848 | AQAAAYTDYSLYKVEPSNTF  | Negative |
| P39848 | RLIAPMLLSAASLAFFAMSG  | Negative |
| P39848 | AMSGSAQAAAYTDYSLYKVE  | Negative |
| P39848 | LLSAASLAFFAMSGSAQAAA  | Negative |
| P39848 | SGSAQAAAYTDYSLYKVEPS  | Negative |
| P39848 | PMLLSAASLAFFAMSGSAQA  | Negative |
| P39848 | LIAPMLLSAASLAFFAMSGS  | Negative |
| P39848 | FFAMSGSAQAAAYTDYSLYK  | Negative |
| P39848 | LSAASLAFFAMSGSAQAAAY  | Negative |
| P39848 | IAPMLLSAASLAFFAMSGSA  | Negative |
| P39848 | SAQAAAYTDYSLYKVEPSNT  | Negative |
| P39848 | AAAYTDYSLYKVEPSNTFST  | Negative |
| P39848 | KRLIAPMLLSAASLAFFAMS  | Negative |
| P39848 | GSAQAAAYTDYSLYKVEPSN  | Negative |
| P39848 | AAAYTDYSLYKVEPSNTFSTE | Negative |
| P39848 | AYTDYSLYKVEPSNTFSTES  | Negative |
| P39873 | VQPSLGKESAAAKFRRQHMD  | Negative |
| P39873 | LLLQVQPSLGKESAAAKFR   | Negative |
| P39873 | VLLLQVQPSLGKESAAAKF   | Negative |
| P39873 | VLLSLLVLVLLLQVQPSLG   | Negative |
| P39873 | QPSLGKESAAAKFRRQHMDS  | Negative |
| P39873 | LLVQVQPSLGKESAAAKFRR  | Negative |
| P39873 | KSLVLLSLLVLVLLLQVQVQ  | Negative |
| P39873 | GKESAAAKFRRQHMDSGSSS  | Negative |
| P39873 | LSLLVLVLLLQVQPSLGKE   | Negative |
| P39873 | LGKESAAAKFRRQHMDSGSS  | Negative |
| P39873 | LLVLVLLLQVQPSLGKESA   | Negative |
| P39873 | ALKSLVLLSLLVLVLLLQVQ  | Negative |
| P39873 | KESAAAKFRRQHMDSGSSSS  | Negative |
| P39873 | VLVLLLQVQPSLGKESAAA   | Negative |
| P39873 | LLSLLVLVLLLQVQPSLGK   | Negative |
| P39873 | ESAAAKFRRQHMDSGSSSSS  | Negative |
| P39873 | LKSLVLLSLLVLVLLLQVQV  | Negative |
| P39873 | MALKSLVLLSLLVLVLLLQV  | Negative |
| P39873 | QVQPSLGKESAAAKFRRQHM  | Negative |
| P39873 | LVLLLQVQPSLGKESAAAK   | Negative |
| P39873 | SLLVLVLLLQVQPSLGKES   | Negative |
| P39873 | VQVQPSLGKESAAAKFRRQH  | Negative |
| P39873 | LVQVQPSLGKESAAAKFRRQ  | Negative |
| P39873 | SLVLLSLLVLVLLLQVQVPS  | Negative |
| P39873 | SAAAKFRRQHMDSGSSSSSN  | Negative |
| P39873 | PSLGKESAAAKFRRQHMDSG  | Negative |

|        |                      |          |
|--------|----------------------|----------|
| P39873 | SLGKESAAAKFRRQHMDSGS | Negative |
| P39873 | LVLLSLLVLVLLLQVQPSL  | Negative |
| P39873 | AAAKFRRQHMDSGSSSSSNP | Negative |
| P40120 | ASLFSQAFAADSDIADGQT  | Negative |
| P40120 | DRRRFIKGSMAAAVCGTSG  | Negative |
| P40120 | AFAADSDIADGQTQRFDFSI | Negative |
| P40120 | MAAVCGTSGIASLFSQAFA  | Negative |
| P40120 | CGTSGIASLFSQAFAADSD  | Negative |
| P40120 | RRFIKGSMAAAVCGTSGIA  | Negative |
| P40120 | SMMAAAVCGTSGIASLFSQA | Negative |
| P40120 | AAFAADSDIADGQTQRFDFS | Negative |
| P40120 | SQAFAADSDIADGQTQRF   | Negative |
| P40120 | SLFSQAFAADSDIADGQTQ  | Negative |
| P40120 | AMAAVCGTSGIASLFSQAAF | Negative |
| P40120 | VCGTSGIASLFSQAFAADS  | Negative |
| P40120 | AVCGTSGIASLFSQAFAAD  | Negative |
| P40120 | GSMMAAAVCGTSGIASLFSQ | Negative |
| P40120 | IASLFSQAFAADSDIADGQ  | Negative |
| P40120 | MMAAAVCGTSGIASLFSQAA | Negative |
| P40120 | RRRFIKGSMAAAVCGTSGI  | Negative |
| P40120 | SGIASLFSQAFAADSDIAD  | Negative |
| P40120 | QAFAADSDIADGQTQRFDF  | Negative |
| P40120 | LFSQAFAADSDIADGQTQR  | Negative |
| P40120 | RFIKGSMAAAVCGTSGIAS  | Negative |
| P40120 | KGSMAAAVCGTSGIASLFS  | Negative |
| P40120 | GIASLFSQAFAADSDIADG  | Negative |
| P40120 | TSGIASLFSQAFAADSDIA  | Negative |
| P40120 | IKGSMAAAVCGTSGIASLF  | Negative |
| P40120 | MDRRRFIKGSMAAAVCGTS  | Negative |
| P40120 | FSQAFAADSDIADGQTQRF  | Negative |
| P40120 | AAVCGTSGIASLFSQAFAA  | Negative |
| P40120 | FIKGSMAAAVCGTSGIASL  | Negative |
| P40136 | LFAISSQAIEVNAMNEHYT  | Negative |
| P40136 | TRNKFIPNKFSIISFSVLLF | Negative |
| P40136 | RNKFIPNKFSIISFSVLLFA | Negative |
| P40136 | SFSVLLFAISSQAIEVNAM  | Negative |
| P40136 | FIPNKFSIISFSVLLFAISS | Negative |
| P40136 | IEVNAMNEHYTESDIKRNHK | Negative |
| P40136 | KFSIISFSVLLFAISSQAI  | Negative |
| P40136 | SVLLFAISSQAIEVNAMNE  | Negative |
| P40136 | PNKFSIISFSVLLFAISSSQ | Negative |
| P40136 | SSQAIEVNAMNEHYTESDIK | Negative |
| P40136 | ISFSVLLFAISSQAIEVNA  | Negative |
| P40136 | SQAIEVNAMNEHYTESDIKR | Negative |
| P40136 | FAISSQAIEVNAMNEHYTE  | Negative |
| P40136 | SIISFSVLLFAISSQAIEV  | Negative |

|        |                      |          |
|--------|----------------------|----------|
| P40136 | IPNKFSIISFSVLLFAISSS | Negative |
| P40136 | MTRNKFIPNKFSIISFSVLL | Negative |
| P40136 | VLLFAISSSQAIEVNAMNEH | Negative |
| P40136 | IISFSVLLFAISSSQAIEVN | Negative |
| P40136 | QAIEVNAMNEHYTESDIKRN | Negative |
| P40136 | AISSSQAIEVNAMNEHYTES | Negative |
| P40136 | AIEVNAMNEHYTESDIKRNH | Negative |
| P40136 | NKFSIISFSVLLFAISSSQA | Negative |
| P40136 | NKFIPNKFSIISFSVLLFAI | Negative |
| P40136 | FSIISFSVLLFAISSSQAIE | Negative |
| P40136 | SSSQAIEVNAMNEHYTESDI | Negative |
| P40136 | KFIPNKFSIISFSVLLFAIS | Negative |
| P40136 | ISSSQAIEVNAMNEHYTESD | Negative |
| P40136 | FSVLLFAISSSQAIEVNAMN | Negative |
| P40136 | EVNAMNEHYTESDIKRNHKT | Negative |
| P40199 | TFWNPPTTAKLTIESTPFNV | Negative |
| P40199 | VPWKEVLLTASLLTFWNPPT | Negative |
| P40199 | PPSAPPCRLHVPWKEVLLTA | Negative |
| P40199 | ASLLTFWNPPTTAKLTIEST | Negative |
| P40199 | PCRLHVPWKEVLLTASLLTF | Negative |
| P40199 | PSAPPCRLHVPWKEVLLTAS | Negative |
| P40199 | WKEVLLTASLLTFWNPPTTA | Negative |
| P40199 | TASLLTFWNPPTTAKLTIES | Negative |
| P40199 | PWKEVLLTASLLTFWNPPTT | Negative |
| P40199 | CRLHVPWKEVLLTASLLTFW | Negative |
| P40199 | PPCRLHVPWKEVLLTASLLT | Negative |
| P40199 | LHVPWKEVLLTASLLTFWNP | Negative |
| P40199 | RLHVPWKEVLLTASLLTFWN | Negative |
| P40199 | WNPPTTAKLTIESTPFNVAE | Negative |
| P40199 | APPCRLHVPWKEVLLTASLL | Negative |
| P40199 | LLTFWNPPTTAKLTIESTPF | Negative |
| P40199 | LTFWNPPTTAKLTIESTPFN | Negative |
| P40199 | GPPSAPPCRLHVPWKEVLLT | Negative |
| P40199 | HVPWKEVLLTASLLTFWNP  | Negative |
| P40199 | FWNPPTTAKLTIESTPFNVA | Negative |
| P40199 | NPPTTAKLTIESTPFNVAEG | Negative |
| P40199 | MGPPSAPPCRLHVPWKEVLL | Negative |
| P40199 | SAPPCRLHVPWKEVLLTASL | Negative |
| P40199 | KEVLLTASLLTFWNPPTTAK | Negative |
| P40199 | SLLTFWNPPTTAKLTIESTP | Negative |
| P40199 | LLTASLLTFWNPPTTAKLTI | Negative |
| P40199 | EVLLTASLLTFWNPPTTAKL | Negative |
| P40199 | PPTTAKLTIESTPFNVAEGK | Negative |
| P40199 | VLLTASLLTFWNPPTTAKLT | Negative |
| P40601 | VFGDSLSDGGNNGRYTVDGI | Negative |
| P40601 | LALSISAISNAHAYNNLYVF | Negative |

|        |                       |          |
|--------|-----------------------|----------|
| P40601 | MKRSFIFAPGMLALSIS AIS | Negative |
| P40601 | IS AISNAHAYNNLYVFGDSL | Negative |
| P40601 | AHAYNNLYVFGDSLSDGGNN  | Negative |
| P40601 | RSFIFAPGMLALSIS AISNA | Negative |
| P40601 | HAYNNLYVFGDSLSDGGNNG  | Negative |
| P40601 | SIS AISNAHAYNNLYVFGDS | Negative |
| P40601 | LYVFGDSLSDGGNNGRYTVD  | Negative |
| P40601 | KRSFIFAPGMLALSIS AISN | Negative |
| P40601 | NAHAYNNLYVFGDSLSDGGN  | Negative |
| P40601 | NLYVFGDSLSDGGNNGRYTV  | Negative |
| P40601 | YVFGDSLSDGGNNGRYTVDG  | Negative |
| P40601 | SAISNAHAYNNLYVFGDSL S | Negative |
| P40601 | SFIFAPGMLALSIS AISNAH | Negative |
| P40601 | AYNNLYVFGDSLSDGGNNGR  | Negative |
| P40601 | ISNAHAYNNLYVFGDSLSDG  | Negative |
| P40601 | IFAPGMLALSIS AISNAHAY | Negative |
| P40601 | LS AISNAHAYNNLYVFGD   | Negative |
| P40601 | FAPGMLALSIS AISNAHAYN | Negative |
| P40601 | AISNAHAYNNLYVFGDSLSD  | Negative |
| P40601 | MLALSIS AISNAHAYNNLYV | Negative |
| P40601 | YNNLYVFGDSLSDGGNNGRY  | Negative |
| P40601 | SNAHAYNNLYVFGDSLSDGG  | Negative |
| P40601 | NNLYVFGDSLSDGGNNGRYT  | Negative |
| P40601 | APGMLALSIS AISNAHAYNN | Negative |
| P40601 | FIFAPGMLALSIS AISNAHA | Negative |
| P40601 | ALS AISNAHAYNNLYVFG   | Negative |
| P40601 | PGMLALSIS AISNAHAYNNL | Negative |
| P40881 | EGAEDNVAQEITVDEFSNIR  | Negative |
| P40881 | LSLALAGSGCISEGAEDNV   | Negative |
| P40881 | AEDNVAQEITVDEFSNIREN  | Negative |
| P40881 | GAEDNVAQEITVDEFSNIRE  | Negative |
| P40881 | NKQIFTILILSLSLALAGSG  | Negative |
| P40881 | LSLALAGSGCISEGAEDNVA  | Negative |
| P40881 | SEGAEDNVAQEITVDEFSNI  | Negative |
| P40881 | QIFTILILSLSLALAGSGCI  | Negative |
| P40881 | LSLALAGSGCISEGAEDN    | Negative |
| P40881 | SGCISEGAEDNVAQEITVDE  | Negative |
| P40881 | ISEGAEDNVAQEITVDEFSN  | Negative |
| P40881 | CISEGAEDNVAQEITVDEFS  | Negative |
| P40881 | LAGSGCISEGAEDNVAQEIT  | Negative |
| P40881 | MFNKQIFTILILSLSLALAG  | Negative |
| P40881 | MMFNKQIFTILILSLSLALA  | Negative |
| P40881 | ALAGSGCISEGAEDNVAQEI  | Negative |
| P40881 | FTILILSLSLALAGSGCISE  | Negative |
| P40881 | TILILSLSLALAGSGCISEG  | Negative |
| P40881 | GSGCISEGAEDNVAQEITVD  | Negative |

|        |                      |          |
|--------|----------------------|----------|
| P40881 | KQIFTILILSLSLALAGSGC | Negative |
| P40881 | LILSLSLALAGSGCISEGAE | Negative |
| P40881 | GCISEGAEDNVAQEITVDEF | Negative |
| P40881 | ILSLSLALAGSGCISEGAED | Negative |
| P40881 | ILILSLSLALAGSGCISEGA | Negative |
| P40881 | LALAGSGCISEGAEDNVAQE | Negative |
| P40881 | FNKQIFTILILSLSLALAGS | Negative |
| P40881 | IFTILILSLSLALAGSGCIS | Negative |
| P40881 | SLALAGSGCISEGAEDNVAQ | Negative |
| P40881 | EDNVAQEITVDEFNIRENP  | Negative |
| P40943 | RNVVRKPLTIGLALTLLLPM | Negative |
| P40943 | LLPMGMTATSAKNADSYAKK | Negative |
| P40943 | SAKNADSYAKKPHISALNAP | Negative |
| P40943 | VRKPLTIGLALTLLLPMGMT | Negative |
| P40943 | LLLPMGMTATSAKNADSYAK | Negative |
| P40943 | AKNADSYAKKPHISALNAPQ | Negative |
| P40943 | IGLALTLLLPMGMTATSAKN | Negative |
| P40943 | LTIGLALTLLLPMGMTATSA | Negative |
| P40943 | TLLLPMGMTATSAKNADSYA | Negative |
| P40943 | NADSYAKKPHISALNAPQLD | Negative |
| P40943 | LTLLLPMGMTATSAKNADSY | Negative |
| P40943 | KPLTIGLALTLLLPMGMTAT | Negative |
| P40943 | TIGLALTLLLPMGMTATSAK | Negative |
| P40943 | VVRKPLTIGLALTLLLPMGM | Negative |
| P40943 | RKPLTIGLALTLLLPMGMTA | Negative |
| P40943 | MRNVVRKPLTIGLALTLLL  | Negative |
| P40943 | TATSAKNADSYAKKPHISAL | Negative |
| P40943 | KNADSYAKKPHISALNAPQL | Negative |
| P40943 | MTATSAKNADSYAKKPHISA | Negative |
| P40943 | LALTLLLPMGMTATSAKNAD | Negative |
| P40943 | PLTIGLALTLLLPMGMTATS | Negative |
| P40943 | GMTATSAKNADSYAKKPHIS | Negative |
| P40943 | GLALTLLLPMGMTATSAKNA | Negative |
| P40943 | ATSAKNADSYAKKPHISALN | Negative |
| P40943 | LPMGMTATSAKNADSYAKKP | Negative |
| P40943 | PMGMTATSAKNADSYAKKPH | Negative |
| P40943 | NVVRKPLTIGLALTLLLPMG | Negative |
| P40943 | MGMTATSAKNADSYAKKPHI | Negative |
| P40943 | TSAKNADSYAKKPHISALNA | Negative |
| P41222 | TLWMGLALLGVLGDLQAAPE | Negative |
| P41222 | HHTLWMGLALLGVLGDLQAA | Negative |
| P41222 | AAPEAQVSVQPNFQQDKFLG | Negative |
| P41222 | HTLWMGLALLGVLGDLQAAP | Negative |
| P41222 | LQAAPEAQVSVQPNFQQDKF | Negative |
| P41222 | APEAQVSVQPNFQQDKFLGR | Negative |
| P41222 | SVQPNFQQDKFLGRWFSAGL | Negative |

|        |                      |          |
|--------|----------------------|----------|
| P41222 | GDLQAAPEAQVSVQPNFQQD | Negative |
| P41222 | LWMGLALLGVLGDLQAAPEA | Negative |
| P41222 | QVSVQPNFQQDKFLGRWFS  | Negative |
| P41222 | AQVSVQPNFQQDKFLGRWFS | Negative |
| P41222 | VSVQPNFQQDKFLGRWFSAG | Negative |
| P41222 | THHTLWMGLALLGVLGDLQA | Negative |
| P41222 | ALLGVLGDLQAAPEAQVSVQ | Negative |
| P41222 | GVLGDLQAAPEAQVSVQPNF | Negative |
| P41222 | GLALLGVLGDLQAAPEAQVS | Negative |
| P41222 | LLGVLGDLQAAPEAQVSVQP | Negative |
| P41222 | LGVLGDLQAAPEAQVSVQPN | Negative |
| P41222 | LALLGVLGDLQAAPEAQVSV | Negative |
| P41222 | LGDLQAAPEAQVSVQPNFQQ | Negative |
| P41222 | PEAQVSVQPNFQQDKFLGRW | Negative |
| P41222 | MATHHTLWMGLALLGVLGDL | Negative |
| P41222 | VLGDLQAAPEAQVSVQPNFQ | Negative |
| P41222 | ATHHTLWMGLALLGVLGDLQ | Negative |
| P41222 | MGLALLGVLGDLQAAPEAQV | Negative |
| P41222 | EAQVSVQPNFQQDKFLGRWF | Negative |
| P41222 | QAAPEAQVSVQPNFQQDKFL | Negative |
| P41222 | DLQAAPEAQVSVQPNFQQDK | Negative |
| P41222 | VQPNFQQDKFLGRWFSAGLA | Negative |
| P41271 | AMLLAAPPINKLALFPDKS  | Negative |
| P41271 | PPINKLALFPDKSAWCEAKN | Negative |
| P41271 | AAPPINKLALFPDKSAWCE  | Negative |
| P41271 | ALFPDKSAWCEAKNITQIVG | Negative |
| P41271 | PAMLLAAPPINKLALFPDK  | Negative |
| P41271 | VGAVLPAMLLAAPPINKLA  | Negative |
| P41271 | LAAPPINKLALFPDKSAWC  | Negative |
| P41271 | VLVGAVLPAMLLAAPPINK  | Negative |
| P41271 | VLPAMLLAAPPINKLALFP  | Negative |
| P41271 | PINKLALFPDKSAWCEAKNI | Negative |
| P41271 | APPINKLALFPDKSAWCEA  | Negative |
| P41271 | KLALFPDKSAWCEAKNITQI | Negative |
| P41271 | LLAAPPINKLALFPDKSAW  | Negative |
| P41271 | LRVLVGAVLPAMLLAAPPPI | Negative |
| P41271 | MMLRVLVGAVLPAMLLAAPP | Negative |
| P41271 | AVLPAMLLAAPPINKLALF  | Negative |
| P41271 | INKLALFPDKSAWCEAKNIT | Negative |
| P41271 | NKLALFPDKSAWCEAKNITQ | Negative |
| P41271 | LPAMLLAAPPINKLALFPD  | Negative |
| P41271 | LFPDKSAWCEAKNITQIVGH | Negative |
| P41271 | PPPINKLALFPDKSAWCEAK | Negative |
| P41271 | FPDKSAWCEAKNITQIVGHS | Negative |
| P41271 | PDKSAWCEAKNITQIVGHSG | Negative |
| P41271 | DKSAWCEAKNITQIVGHSGC | Negative |

|        |                      |          |
|--------|----------------------|----------|
| P41271 | RVLVGAVLPAMLLAAPPIN  | Negative |
| P41271 | GAVLPAMLLAAPPINKLAL  | Negative |
| P41271 | LALFPDKSAWCEAKNITQIV | Negative |
| P41271 | MLLAAPPINKLALFPDKSA  | Negative |
| P41271 | LVGAVLPAMLLAAPPINKL  | Negative |
| P41361 | SNGIGTVTAGKRSICLLPLL | Negative |
| P41361 | GTVTAGKRSICLLPLLIGL  | Negative |
| P41361 | WGCVTCHRSPVEDVCTAKPR | Negative |
| P41361 | LLIGLWGCVTCHRSPVEDVC | Negative |
| P41361 | TVTAGKRSICLLPLLIGLW  | Negative |
| P41361 | LIGLWGCVTCHRSPVEDVCT | Negative |
| P41361 | KRSICLLPLLIGLWGCVTC  | Negative |
| P41361 | VTCHRSPVEDVCTAKPRDIP | Negative |
| P41361 | CLLPLLIGLWGCVTCHRSP  | Negative |
| P41361 | TAGKRSICLLPLLIGLWGC  | Negative |
| P41361 | AGKRSICLLPLLIGLWGCV  | Negative |
| P41361 | PLLIGLWGCVTCHRSPVED  | Negative |
| P41361 | CVTCHRSPVEDVCTAKPRDI | Negative |
| P41361 | ISNGIGTVTAGKRSICLLPL | Negative |
| P41361 | LWGCVTCHRSPVEDVCTAKP | Negative |
| P41361 | SICLLPLLIGLWGCVTCHR  | Negative |
| P41361 | GCVTCHRSPVEDVCTAKPRD | Negative |
| P41361 | GIGTVTAGKRSICLLPLLI  | Negative |
| P41361 | IGTVTAGKRSICLLPLLIG  | Negative |
| P41361 | RSICLLPLLIGLWGCVTCH  | Negative |
| P41361 | MISNGIGTVTAGKRSICLLP | Negative |
| P41361 | IGLWGCVTCHRSPVEDVCTA | Negative |
| P41361 | NGIGTVTAGKRSICLLPLL  | Negative |
| P41361 | GLWGCVTCHRSPVEDVCTAK | Negative |
| P41361 | LPLLIGLWGCVTCHRSPVE  | Negative |
| P41361 | ICLLPLLIGLWGCVTCHRS  | Negative |
| P41361 | GKRSICLLPLLIGLWGCVT  | Negative |
| P41361 | VTAGKRSICLLPLLIGLWG  | Negative |
| P41361 | LLIGLWGCVTCHRSPVEDV  | Negative |
| P41547 | GGLQAAPFRSALEGLPDPTA | Negative |
| P41547 | LCQAGGLQAAPFRSALEGLP | Negative |
| P41547 | APFRSALEGLPDPTALSEKE | Negative |
| P41547 | FSILVLCQAGGLQAAPFRSA | Negative |
| P41547 | WKSSPFLAFSILVLCQAGGL | Negative |
| P41547 | SPFLAFSILVLCQAGGLQAA | Negative |
| P41547 | AAPFRSALEGLPDPTALSEK | Negative |
| P41547 | AGGLQAAPFRSALEGLPDPT | Negative |
| P41547 | LVLCQAGGLQAAPFRSALEG | Negative |
| P41547 | LAFSILVLCQAGGLQAAPFR | Negative |
| P41547 | PFRSALEGLPDPTALSEKEG | Negative |
| P41547 | RSALEGLPDPTALSEKEGRL | Negative |

|        |                       |          |
|--------|-----------------------|----------|
| P41547 | SSPFLAFSILVLCQAGGLQA  | Negative |
| P41547 | GLQAAPFRSALEGLPDPTAL  | Negative |
| P41547 | VLCQAGGLQAAPFRSALEGL  | Negative |
| P41547 | CQAGGLQAAPFRSALEGLPD  | Negative |
| P41547 | MGLWKSSPFLAFSILVLCQA  | Negative |
| P41547 | LQAAPFRSALEGLPDPTALS  | Negative |
| P41547 | ILVLCQAGGLQAAPFRSALE  | Negative |
| P41547 | QAGGLQAAPFRSALEGLPDP  | Negative |
| P41547 | FRSALEGLPDPTALSEKEGR  | Negative |
| P41547 | FLAFSILVLCQAGGLQAAPF  | Negative |
| P41547 | PFLAFSILVLCQAGGLQAAP  | Negative |
| P41547 | GLWKSSPFLAFSILVLCQAG  | Negative |
| P41547 | SALEGLPDPTALSEKEGRLL  | Negative |
| P41547 | QAAPFRSALEGLPDPTALSE  | Negative |
| P41547 | SILVLCQAGGLQAAPFRSAL  | Negative |
| P41547 | LWKSSPFLAFSILVLCQAGG  | Negative |
| P41547 | KSSPFLAFSILVLCQAGGLQ  | Negative |
| P41822 | TAQAQEQTVGATDNYQWDSV  | Negative |
| P41822 | VAITVAILSIIYQETAQAQEQ | Negative |
| P41822 | VAILSIIYQETAQAQEQTVA  | Negative |
| P41822 | AITVAILSIIYQETAQAQEQT | Negative |
| P41822 | MKSVFFGVVAITVAILSIIYQ | Negative |
| P41822 | IYQETAQAQEQTVGATDNYQ  | Negative |
| P41822 | FFGVVAITVAILSIIYQETAQ | Negative |
| P41822 | AQEQTVGATDNYQWDSVDDQ  | Negative |
| P41822 | EQTVGATDNYQWDSVDDQCL  | Negative |
| P41822 | ILSIYQETAQAQEQTVGATD  | Negative |
| P41822 | QEQTVGATDNYQWDSVDDQC  | Negative |
| P41822 | MMKSVFFGVVAITVAILSIIY | Negative |
| P41822 | VFFGVVAITVAILSIIYQETA | Negative |
| P41822 | YQETAQAQEQTVGATDNYQW  | Negative |
| P41822 | QETAQAQEQTVGATDNYQWD  | Negative |
| P41822 | ITVAILSIIYQETAQAQEQT  | Negative |
| P41822 | QAQEQTVGATDNYQWDSVDD  | Negative |
| P41822 | KSVFFGVVAITVAILSIIYQE | Negative |
| P41822 | GVVAITVAILSIIYQETAQAQ | Negative |
| P41822 | ETAQAQEQTVGATDNYQWDS  | Negative |
| P41822 | AILSIIYQETAQAQEQTVGAT | Negative |
| P41822 | AQAQEQTVGATDNYQWDSVD  | Negative |
| P41822 | LSIYQETAQAQEQTVGATDN  | Negative |
| P41822 | QTVGATDNYQWDSVDDQCLA  | Negative |
| P41822 | TVGATDNYQWDSVDDQCLAA  | Negative |
| P41822 | FGVVAITVAILSIIYQETAQA | Negative |
| P41822 | SIYQETAQAQEQTVGATDNY  | Negative |
| P41822 | VVAITVAILSIIYQETAQAQE | Negative |
| P41822 | SVFFGVVAITVAILSIIYQET | Negative |



|        |                      |          |
|--------|----------------------|----------|
| P42111 | MVKSFRMKALIAGAAVAAAV | Negative |
| P42111 | VAAAVSAGAVSDVPAAKVLQ | Negative |
| P42111 | AAKVLQPTAAYAAETVFSQN | Negative |
| P42111 | AVSAGAVSDVPAAKVLQPTA | Negative |
| P42111 | ALIAGAAVAAAVSAGAVSDV | Negative |
| P42111 | VKSFRMKALIAGAAVAAAVS | Negative |
| P42111 | FRMKALIAGAAVAAAVSAGA | Negative |
| P42111 | AGAAVAAAVSAGAVSDVPA  | Negative |
| P42111 | VSDVPAAKVLQPTAAYAAET | Negative |
| P42111 | RMKALIAGAAVAAAVSAGAV | Negative |
| P42111 | KALIAGAAVAAAVSAGAVSD | Negative |
| P42111 | AGAVSDVPAAKVLQPTAAYA | Negative |
| P42111 | AVAAAVSAGAVSDVPAAKVL | Negative |
| P42111 | VPAAKVLQPTAAYAAETVFS | Negative |
| P42111 | SFRMKALIAGAAVAAAVSAG | Negative |
| P42111 | LIAGAAVAAAVSAGAVSDVP | Negative |
| P42111 | AVSDVPAAKVLQPTAAYAAE | Negative |
| P42111 | SAGAVSDVPAAKVLQPTAAY | Negative |
| P42111 | AAVAAAVSAGAVSDVPAAKV | Negative |
| P42111 | SDVPAAKVLQPTAAYAAETV | Negative |
| P42111 | KSFRMKALIAGAAVAAAVSA | Negative |
| P42111 | AAAVSAGAVSDVPAAKVLQP | Negative |
| P42111 | GAVSDVPAAKVLQPTAAYAA | Negative |
| P42111 | GAAVAAAVSAGAVSDVPAAK | Negative |
| P42111 | PAAKVLQPTAAYAAETVFSQ | Negative |
| P42111 | IAGAAVAAAVSAGAVSDVPA | Negative |
| P42111 | MKALIAGAAVAAAVSAGAVS | Negative |
| P42111 | AAVSAGAVSDVPAAKVLQPT | Negative |
| P42111 | VSAGAVSDVPAAKVLQPTAA | Negative |
| P42251 | ESFQNNTFDRRKFIQGAGKI | Negative |
| P42251 | WVQKLKEESFQNNTFDRRK  | Negative |
| P42251 | EWVQKLKEESFQNNTFDRRK | Negative |
| P42251 | MAYDSRFDEWVQKLKEESFQ | Negative |
| P42251 | AYDSRFDEWVQKLKEESFQN | Negative |
| P42251 | IQGAGKIAGLSLGLTIAQSV | Negative |
| P42251 | KFIQGAGKIAGLSLGLTIAQ | Negative |
| P42251 | FIQGAGKIAGLSLGLTIAQS | Negative |
| P42251 | FQNNTFDRRKFIQGAGKIAG | Negative |
| P42251 | DSRFDEWVQKLKEESFQNNT | Negative |
| P42251 | EESFQNNTFDRRKFIQGAGK | Negative |
| P42251 | FDRRKFIQGAGKIAGLSLGL | Negative |
| P42251 | VQKLKEESFQNNTFDRRKFI | Negative |
| P42251 | KLKEESFQNNTFDRRKFIQG | Negative |
| P42251 | SRFDEWVQKLKEESFQNNTF | Negative |
| P42251 | TFDRRKFIQGAGKIAGLSLG | Negative |
| P42251 | KEESFQNNTFDRRKFIQGAG | Negative |

|        |                       |          |
|--------|-----------------------|----------|
| P42251 | DEWVQKLKEESFQNNTFDRR  | Negative |
| P42251 | YDSRFDEWVQKLKEESFQNN  | Negative |
| P42251 | RFDEWVQKLKEESFQNNTFD  | Negative |
| P42251 | QNNTFDRRKFIQGAGKIAL   | Negative |
| P42251 | LKEESFQNNTFDRRKFIQGA  | Negative |
| P42251 | DRRKFIQGAGKIALSLGLT   | Negative |
| P42251 | QKLKEESFQNNTFDRRKFIQ  | Negative |
| P42251 | FDEWVQKLKEESFQNNTFDR  | Negative |
| P42251 | RRKFIQGAGKIALSLGLTI   | Negative |
| P42251 | NTFDRRKFIQGAGKIALSL   | Negative |
| P42251 | SFQNNTFDRRKFIQGAGKIA  | Negative |
| P42251 | RKFIQGAGKIALSLGLTIA   | Negative |
| P42251 | NNTFDRRKFIQGAGKIALS   | Negative |
| P42254 | GISLKVSTQGGNSSSPILYG  | Negative |
| P42254 | VAFSALSGVSAVSLLLSLVQ  | Negative |
| P42254 | MVAFSALSGVSAVSLLLSLV  | Negative |
| P42254 | VQNAHGISLKVSTQGGNSSS  | Negative |
| P42254 | LVQNAHGISLKVSTQGGNSS  | Negative |
| P42254 | LKVSTQGGNSSSPILYGFMF  | Negative |
| P42254 | VSTQGGNSSSPILYGFMFED  | Negative |
| P42254 | FSALSGVSAVSLLLSLVQNA  | Negative |
| P42254 | LSGVSAVSLLLSLVQNAHGI  | Negative |
| P42254 | AVSLLLSLVQNAHGISLKVS  | Negative |
| P42254 | VSLLLSLVQNAHGISLKVST  | Negative |
| P42254 | HGISLKVSTQGGNSSSPILY  | Negative |
| P42254 | AHGISLKVSTQGGNSSSPIL  | Negative |
| P42254 | SLVQNAHGISLKVSTQGGNS  | Negative |
| P42254 | SLLSLVQNAHGISLKVSTQ   | Negative |
| P42254 | KVSTQGGNSSSPILYGFME   | Negative |
| P42254 | LLSLVQNAHGISLKVSTQG   | Negative |
| P42254 | AFSALSGVSAVSLLLSLVQN  | Negative |
| P42254 | QNAHGISLKVSTQGGNSSSP  | Negative |
| P42254 | LLSLVQNAHGISLKVSTQGG  | Negative |
| P42254 | VSAVSLLLSLVQNAHGISLK  | Negative |
| P42254 | ALSGVSAVSLLLSLVQNAHG  | Negative |
| P42254 | SLKVSTQGGNSSSPILYGF   | Negative |
| P42254 | SGVSAVSLLLSLVQNAHGIS  | Negative |
| P42254 | GVS AVSLLLSLVQNAHGISL | Negative |
| P42254 | LSLVQNAHGISLKVSTQGGN  | Negative |
| P42254 | SALSGVSAVSLLLSLVQNAH  | Negative |
| P42254 | NAHGISLKVSTQGGNSSSPI  | Negative |
| P42254 | ISLKVSTQGGNSSSPILYGF  | Negative |
| P42255 | SRRNLVALGLAATVSAGPCD  | Negative |
| P42255 | ALGLAATVSAGPCDIYEAGD  | Negative |
| P42255 | FSRRNLVALGLAATVSAGPC  | Negative |
| P42255 | DTPCVAAHSTTRALYSSFSG  | Negative |

|        |                      |          |
|--------|----------------------|----------|
| P42255 | RNLVALGLAATVSAGPCDIY | Negative |
| P42255 | GPCDIYEAGDTPCVAAHSTT | Negative |
| P42255 | EAGDTPCVAAHSTTRALYSS | Negative |
| P42255 | SAGPCDIYEAGDTPCVAAH  | Negative |
| P42255 | TVSAGPCDIYEAGDTPCVAA | Negative |
| P42255 | MFSRRNLVALGLAATVSAGP | Negative |
| P42255 | LVALGLAATVSAGPCDIYEA | Negative |
| P42255 | DIYEAGDTPCVAAHSTTRAL | Negative |
| P42255 | TPCVAAHSTTRALYSSFSGA | Negative |
| P42255 | CDIYEAGDTPCVAAHSTTRA | Negative |
| P42255 | AATVSAGPCDIYEAGDTPCV | Negative |
| P42255 | PCDIYEAGDTPCVAAHSTTR | Negative |
| P42255 | YEAGDTPCVAAHSTTRALYS | Negative |
| P42255 | GDTPCVAAHSTTRALYSSFS | Negative |
| P42255 | PCVAAHSTTRALYSSFSGAL | Negative |
| P42255 | LGLAATVSAGPCDIYEAGDT | Negative |
| P42255 | NLVALGLAATVSAGPCDIYE | Negative |
| P42255 | LAATVSAGPCDIYEAGDTPC | Negative |
| P42255 | IYEAGDTPCVAAHSTTRALY | Negative |
| P42255 | ATVSAGPCDIYEAGDTPCVA | Negative |
| P42255 | VSAGPCDIYEAGDTPCVAAH | Negative |
| P42255 | AGPCDIYEAGDTPCVAAHST | Negative |
| P42255 | AGDTPCVAAHSTTRALYSSF | Negative |
| P42255 | VALGLAATVSAGPCDIYEAG | Negative |
| P42255 | GLAATVSAGPCDIYEAGDTP | Negative |
| P42256 | SLVHGYADPGACSGVCTTHD | Negative |
| P42256 | ACSGVCTTHDPGLIRRESDG | Negative |
| P42256 | ASLVHGYADPGACSGVCTTH | Negative |
| P42256 | PGACSGVCTTHDPGLIRRES | Negative |
| P42256 | LLASLVHGYADPGACSGVCT | Negative |
| P42256 | SVASVPLLASLVHGYADPGA | Negative |
| P42256 | SVPLLASLVHGYADPGACSG | Negative |
| P42256 | SGVCTTHDPGLIRRESDGTY | Negative |
| P42256 | CSGVCTTHDPGLIRRESDGT | Negative |
| P42256 | MYQLLSVASVPLLASLVHGY | Negative |
| P42256 | PLLASLVHGYADPGACSGVC | Negative |
| P42256 | LASLVHGYADPGACSGVCTT | Negative |
| P42256 | VCTTHDPGLIRRESDGTYFL | Negative |
| P42256 | LVHGYADPGACSGVCTTHDP | Negative |
| P42256 | CTTHDPGLIRRESDGTYFLF | Negative |
| P42256 | LLSVASVPLLASLVHGYADP | Negative |
| P42256 | YQLLSVASVPLLASLVHGYA | Negative |
| P42256 | YADPGACSGVCTTHDPGLIR | Negative |
| P42256 | GVCTTHDPGLIRRESDGTYF | Negative |
| P42256 | GYADPGACSGVCTTHDPGLI | Negative |
| P42256 | GACSGVCTTHDPGLIRRESD | Negative |

|        |                      |          |
|--------|----------------------|----------|
| P42256 | ASVPLLASLVHGYADPGACS | Negative |
| P42256 | VASVPLLASLVHGYADPGAC | Negative |
| P42256 | QLLSVASVPLLASLVHGYAD | Negative |
| P42256 | HGYADPGACSGVCTTHDPGL | Negative |
| P42256 | VHGYADPGACSGVCTTHDPG | Negative |
| P42256 | VPLLASLVHGYADPGACSGV | Negative |
| P42256 | DPGACSGVCTTHDPGLIRRE | Negative |
| P42256 | ADPGACSGVCTTHDPGLIRR | Negative |
| P42512 | TETKVIKGRQGIARNRHTPL | Negative |
| P42512 | LCLGLLLALSPLAAAVADAR | Negative |
| P42512 | IKGRQGIARNRHTPLCLGLL | Negative |
| P42512 | QGIARNRHTPLCLGLLLALS | Negative |
| P42512 | RHTPLCLGLLLALSPLAAAV | Negative |
| P42512 | LSPLAAAVADARKDGETELP | Negative |
| P42512 | HTPLCLGLLLALSPLAAAVA | Negative |
| P42512 | ARNRHTPLCLGLLLALSPLA | Negative |
| P42512 | LLALSPLAAAVADARKDGET | Negative |
| P42512 | GLLLALSPLAAAVADARKDG | Negative |
| P42512 | PLCLGLLLALSPLAAAVADA | Negative |
| P42512 | ETKVIKGRQGIARNRHTPLC | Negative |
| P42512 | IARNRHTPLCLGLLLALSPL | Negative |
| P42512 | CLGLLLALSPLAAAVADARK | Negative |
| P42512 | LLLALSPLAAAVADARKDGE | Negative |
| P42512 | GIARNRHTPLCLGLLLALSP | Negative |
| P42512 | RQGIARNRHTPLCLGLLLAL | Negative |
| P42512 | ALSPLAAAVADARKDGETEL | Negative |
| P42512 | KVIKGRQGIARNRHTPLCLG | Negative |
| P42512 | TPLCLGLLLALSPLAAAVAD | Negative |
| P42512 | NRHTPLCLGLLLALSPLAAA | Negative |
| P42512 | GRQGIARNRHTPLCLGLLLA | Negative |
| P42512 | VIKGRQGIARNRHTPLCLGL | Negative |
| P42512 | KTETKVIKGRQGIARNRHTP | Negative |
| P42512 | KGRQGIARNRHTPLCLGLLL | Negative |
| P42512 | LALSPLAAAVADARKDGETE | Negative |
| P42512 | TKVIKGRQGIARNRHTPLCL | Negative |
| P42512 | MKTETKVIKGRQGIARNRHT | Negative |
| P42512 | RNRHTPLCLGLLLALSPLAA | Negative |
| P42517 | VSLGSLSSALNERMQVMKAV | Negative |
| P42517 | THFVAIFFSSLFMCSNVFAG | Negative |
| P42517 | MCSNVFAGSVSSVSLGSLSS | Negative |
| P42517 | AGSVSSVSLGSLSSALNERM | Negative |
| P42517 | FMCSNVFAGSVSSVSLGSLS | Negative |
| P42517 | SSVSLGSLSSALNERMQVMK | Negative |
| P42517 | SLSSALNERMQVMKAVAGYK | Negative |
| P42517 | CSNVFAGSVSSVSLGSLSSA | Negative |
| P42517 | GSLSSALNERMQVMKAVAGY | Negative |

|        |                      |          |
|--------|----------------------|----------|
| P42517 | GSVSSVSLGSLSSALNERMQ | Negative |
| P42517 | VFAGSVSSVSLGSLSSALNE | Negative |
| P42517 | FFSSLFMCSNVFAGSVSSVS | Negative |
| P42517 | NVFAGSVSSVSLGSLSSALN | Negative |
| P42517 | SVSSVSLGSLSSALNERMQV | Negative |
| P42517 | SSLFMCSNVFAGSVSSVSLG | Negative |
| P42517 | SNVFAGSVSSVSLGSLSSAL | Negative |
| P42517 | VSSVSLGSLSSALNERMQVM | Negative |
| P42517 | SLGSLSSALNERMQVMKAVA | Negative |
| P42517 | FAGSVSSVSLGSLSSALNER | Negative |
| P42517 | SVSLGSLSSALNERMQVMKA | Negative |
| P42517 | VAIFFSSLFMCSNVFAGSVS | Negative |
| P42517 | IFFSSLFMCSNVFAGSVSSV | Negative |
| P42517 | FVAIFFSSLFMCSNVFAGSV | Negative |
| P42517 | LFMCSNVFAGSVSSVSLGSL | Negative |
| P42517 | MTHFVAIFFSSLFMCSNVFA | Negative |
| P42517 | SLFMCSNVFAGSVSSVSLGS | Negative |
| P42517 | FSSLFMCSNVFAGSVSSVSL | Negative |
| P42517 | HFVAIFFSSLFMCSNVFAGS | Negative |
| P42517 | LGSLSSALNERMQVMKAVAG | Negative |
| P42578 | TVRQNYKENINQLLEQQIQK | Negative |
| P42578 | YGKEFVATVRQNYKENINQL | Negative |
| P42578 | LAYGKEFVATVRQNYKENIN | Negative |
| P42578 | ATVRQNYKENINQLLEQQIQ | Negative |
| P42578 | EFVATVRQNYKENINQLLEQ | Negative |
| P42578 | TLAVCSSLAYGKEFVATVRQ | Negative |
| P42578 | KENINQLLEQQIQKELAASY | Negative |
| P42578 | CSSLAYGKEFVATVRQNYKE | Negative |
| P42578 | KEFVATVRQNYKENINQLLE | Negative |
| P42578 | MNSVLFLTLAVCSSLAYGKE | Negative |
| P42578 | YKENINQLLEQQIQKELAAS | Negative |
| P42578 | AYGKEFVATVRQNYKENINQ | Negative |
| P42578 | GKEFVATVRQNYKENINQLL | Negative |
| P42578 | AVCSSLAYGKEFVATVRQNY | Negative |
| P42578 | SSLAYGKEFVATVRQNYKEN | Negative |
| P42578 | QNYKENINQLLEQQIQKELA | Negative |
| P42578 | SVLFLTLAVCSSLAYGKEFV | Negative |
| P42578 | FLTLAVCSSLAYGKEFVATV | Negative |
| P42578 | VCSSLAYGKEFVATVRQNYK | Negative |
| P42578 | SLAYGKEFVATVRQNYKENI | Negative |
| P42578 | VATVRQNYKENINQLLEQQI | Negative |
| P42578 | NSVLFLTLAVCSSLAYGKEF | Negative |
| P42578 | VRQNYKENINQLLEQQIQKE | Negative |
| P42578 | NYKENINQLLEQQIQKELAA | Negative |
| P42578 | LFLTLAVCSSLAYGKEFVAT | Negative |
| P42578 | LAVCSSLAYGKEFVATVRQN | Negative |

|        |                       |          |
|--------|-----------------------|----------|
| P42578 | FVATVRQNYKENINQLLEQQ  | Negative |
| P42578 | RQNYKENINQLLEQQIQKEL  | Negative |
| P42578 | LTLAVCSSLAYGKEFVATVR  | Negative |
| P42579 | RTQSRFASYELMGTEGTECV  | Negative |
| P42579 | SSRTQSRFASYELMGTEGTE  | Negative |
| P42579 | LSSVALRYLLVLSLAFLAVV  | Negative |
| P42579 | TSSRTQSRFASYELMGTEGT  | Negative |
| P42579 | LVLSLAFLAVVTSSRTQSRF  | Negative |
| P42579 | AVVTSSRTQSRFASYELMGTE | Negative |
| P42579 | SLAFLAVVTSSRTQSRFASY  | Negative |
| P42579 | TQSRFASYELMGTEGTECVT  | Negative |
| P42579 | LAVVTSSRTQSRFASYELMG  | Negative |
| P42579 | VTSSRTQSRFASYELMGTEG  | Negative |
| P42579 | SRFASYELMGTEGTECVTTK  | Negative |
| P42579 | QSRFASYELMGTEGTECVTT  | Negative |
| P42579 | FLAVVTSSRTQSRFASYELM  | Negative |
| P42579 | LRVLLVLSLAFLAVVTSSRT  | Negative |
| P42579 | LLVLSLAFLAVVTSSRTQSR  | Negative |
| P42579 | LAFLAVVTSSRTQSRFASYE  | Negative |
| P42579 | AFLAVVTSSRTQSRFASYEL  | Negative |
| P42579 | VVTSSRTQSRFASYELMGTE  | Negative |
| P42579 | SRTQSRFASYELMGTEGTEC  | Negative |
| P42579 | VALRYLLVLSLAFLAVVTSS  | Negative |
| P42579 | RYLLVLSLAFLAVVTSSRTQ  | Negative |
| P42579 | SSVALRYLLVLSLAFLAVVT  | Negative |
| P42579 | FASYELMGTEGTECVTTKTI  | Negative |
| P42579 | RFASYELMGTEGTECVTTKT  | Negative |
| P42579 | ALRYLLVLSLAFLAVVTSSR  | Negative |
| P42579 | MLSSVALRYLLVLSLAFLAV  | Negative |
| P42579 | SVALRYLLVLSLAFLAVVTS  | Negative |
| P42579 | VLSLAFLAVVTSSRTQSRFA  | Negative |
| P42579 | LSLAFLAVVTSSRTQSRFAS  | Negative |
| P42660 | LLVLIAFTCYTCSDATLWNP  | Negative |
| P42660 | KKLMRGSASPRRPGESGEPL  | Negative |
| P42660 | LWNPYKKLMRGSASPRRPGE  | Negative |
| P42660 | YTCSDATLWNPYKKLMRGS   | Negative |
| P42660 | FHLLVLIAFTCYTCSDATLW  | Negative |
| P42660 | PYKKLMRGSASPRRPGESGE  | Negative |
| P42660 | VKFHLLVLIAFTCYTCSDAT  | Negative |
| P42660 | SDATLWNPYKKLMRGSASPR  | Negative |
| P42660 | YKKLMRGSASPRRPGESGEP  | Negative |
| P42660 | WNPYKKLMRGSASPRRPGES  | Negative |
| P42660 | ATLWNPYKKLMRGSASPRRP  | Negative |
| P42660 | CYTCSDATLWNPYKKLMRGS  | Negative |
| P42660 | VLIAFTCYTCSDATLWNPYK  | Negative |
| P42660 | TCYTCSDATLWNPYKKLMRG  | Negative |

|        |                      |          |
|--------|----------------------|----------|
| P42660 | LVLIAFTCYTCSDATLWNPY | Negative |
| P42660 | FTCYTCSDATLWNPYKKLMR | Negative |
| P42660 | DATLWNPYKKLMRGSASPRR | Negative |
| P42660 | TCSDATLWNPYKKLMRGSAS | Negative |
| P42660 | LIAFTCYTCSDATLWNPYKK | Negative |
| P42660 | IAFTCYTCSDATLWNPYKKL | Negative |
| P42660 | KLMRGSASPRRPGESGEPLF | Negative |
| P42660 | AFTCYTCSDATLWNPYKKLM | Negative |
| P42660 | MVKFHLLVLIAFTCYTCSDA | Negative |
| P42660 | TLWNPYKKLMRGSASPRRPG | Negative |
| P42660 | NPYKKLMRGSASPRRPGESG | Negative |
| P42660 | KFHLLVLIAFTCYTCSDATL | Negative |
| P42660 | LMRGSASPRRPGESGEPLFL | Negative |
| P42660 | MRGSASPRRPGESGEPLFLT | Negative |
| P42660 | CSDATLWNPYKKLMRGSASP | Negative |
| P42705 | PAPPACDPRLLNKMLRDSHV | Negative |
| P42705 | MELTELLLVVMLLLTARLDP | Negative |
| P42705 | PACDPRLLNKMLRDSHVLHS | Negative |
| P42705 | TELLLVVMLLLTARLDPCLP | Negative |
| P42705 | CDPRLLNKMLRDSHVLHSRL | Negative |
| P42705 | CLPAPPACDPRLLNKMLRDS | Negative |
| P42705 | LPAPPACDPRLLNKMLRDSH | Negative |
| P42705 | ARLDPCLPAPPACDPRLLNK | Negative |
| P42705 | DPRLLNKMLRDSHVLHSRLS | Negative |
| P42705 | APPACDPRLLNKMLRDSHVL | Negative |
| P42705 | PCLPAPPACDPRLLNKMLRD | Negative |
| P42705 | LTELLLVVMLLLTARLDPCL | Negative |
| P42705 | LLLVVMLLLTARLDPCLPAP | Negative |
| P42705 | LDPCLPAPPACDPRLLNKML | Negative |
| P42705 | LLLTARLDPCLPAPPACDPR | Negative |
| P42705 | LLTARLDPCLPAPPACDPRL | Negative |
| P42705 | ELLLVVMLLLTARLDPCLPA | Negative |
| P42705 | PRLLNKMLRDSHVLHSRLSQ | Negative |
| P42705 | RLDPCLPAPPACDPRLLNKM | Negative |
| P42705 | DPCLPAPPACDPRLLNKMLR | Negative |
| P42705 | LVVMLLLTARLDPCLPAPPA | Negative |
| P42705 | ELTELLLVVMLLLTARLDPC | Negative |
| P42705 | LTARLDPCLPAPPACDPRL  | Negative |
| P42705 | MLLLTARLDPCLPAPPACDP | Negative |
| P42705 | PPACDPRLLNKMLRDSHVLH | Negative |
| P42705 | ACDPRLLNKMLRDSHVLHSR | Negative |
| P42705 | LLVVMLLLTARLDPCLPAPP | Negative |
| P42705 | TARLDPCLPAPPACDPRLN  | Negative |
| P42705 | VMLLLTARLDPCLPAPPACD | Negative |
| P42813 | ASSSEDFDFYFVQQWPGS   | Negative |
| P42813 | LLASLCLISLLVILPSVFSA | Negative |

|        |                      |          |
|--------|----------------------|----------|
| P42813 | KILLASLCLISLLVILPSVF | Negative |
| P42813 | SLCLISLLVILPSVFSASSS | Negative |
| P42813 | LISLLVILPSVFSASSSSED | Negative |
| P42813 | ISLLVILPSVFSASSSSEDF | Negative |
| P42813 | CLISLLVILPSVFSASSSSE | Negative |
| P42813 | SSEDFDFFYFVQQWPGSYCD | Negative |
| P42813 | LLVILPSVFSASSSSEDFDF | Negative |
| P42813 | LVILPSVFSASSSSEDFDFF | Negative |
| P42813 | LASLCLISLLVILPSVFSAS | Negative |
| P42813 | SVFSASSSSEDFDFFYFVQQ | Negative |
| P42813 | SLLVILPSVFSASSSSEDFD | Negative |
| P42813 | PSVFSASSSSEDFDFFYFVQ | Negative |
| P42813 | VFSASSSSEDFDFFYFVQQW | Negative |
| P42813 | SSSSEDFDFFYFVQQWPGSY | Negative |
| P42813 | ILPSVFSASSSSEDFDFFYF | Negative |
| P42813 | ASLCLISLLVILPSVFSASS | Negative |
| P42813 | SASSSSEDFDFFYFVQQWPG | Negative |
| P42813 | FSASSSSEDFDFFYFVQQWP | Negative |
| P42813 | SSSEDFDFFYFVQQWPGSYC | Negative |
| P42813 | SEDFDFFYFVQQWPGSYCDT | Negative |
| P42813 | VILPSVFSASSSSEDFDFFY | Negative |
| P42813 | ILLASLCLISLLVILPSVFS | Negative |
| P42813 | DFDFFYFVQQWPGSYCDTQK | Negative |
| P42813 | LPSVFSASSSSEDFDFFYFV | Negative |
| P42813 | MKILLASLCLISLLVILPSV | Negative |
| P42813 | EDFDFFYFVQQWPGSYCDTQ | Negative |
| P42813 | FDFYFVQQWPGSYCDTQKK  | Negative |
| P42830 | LLLLLTQPGPIASAGPAAAV | Negative |
| P42830 | LTQPGPIASAGPAAAVLREL | Negative |
| P42830 | LCALLVLLLLLTQPGPIASA | Negative |
| P42830 | SLLSSRAARVPGPSSSLCAL | Negative |
| P42830 | ARVPGPSSSLCALLVLLLLL | Negative |
| P42830 | MSLLSSRAARVPGPSSSLCA | Negative |
| P42830 | LLVLLLLLTQPGPIASAGPA | Negative |
| P42830 | SLCALLVLLLLLTQPGPIAS | Negative |
| P42830 | LLLTQPGPIASAGPAAAVLR | Negative |
| P42830 | SSSLCALLVLLLLLTQPGPI | Negative |
| P42830 | LLSSRAARVPGPSSSLCALL | Negative |
| P42830 | SSLCALLVLLLLLTQPGPIA | Negative |
| P42830 | VPGPSSSLCALLVLLLLLTQ | Negative |
| P42830 | AARVPGPSSSLCALLVLLLL | Negative |
| P42830 | QPGPIASAGPAAAVLRELRC | Negative |
| P42830 | ALLVLLLLLTQPGPIASAGP | Negative |
| P42830 | LSSRAARVPGPSSSLCALLV | Negative |
| P42830 | PGPSSSLCALLVLLLLLTQP | Negative |
| P42830 | LLLLTQPGPIASAGPAAAVL | Negative |



|        |                       |          |
|--------|-----------------------|----------|
| P42830 | LLTQPGPIASAGPAAAVLRE  | Negative |
| P42830 | CALLVLLLLLTQPGPIASAG  | Negative |
| P42830 | GPSSSLCALLVLLLLLTQPG  | Negative |
| P42830 | RVPGPSSSLCALLVLLLLLT  | Negative |
| P42830 | PSSSLCALLVLLLLLTQPGP  | Negative |
| P42830 | TQPGPIASAGPAAAVLRELRL | Negative |
| P42830 | VLLLLLTQPGPIASAGPAAA  | Negative |
| P42830 | SSRAARVPGPSSSLCALLVL  | Negative |
| P42830 | SRAARVPGPSSSLCALLVLL  | Negative |
| P42830 | RAARVPGPSSSLCALLVLLL  | Negative |
| P42889 | DPRGLIINLDNGELCLNSAQ  | Negative |
| P42889 | ALVLLTLAVAYAAPDPRGLI  | Negative |
| P42889 | LVLLTLAVAYAAPDPRGLII  | Negative |
| P42889 | IINLDNGELCLNSAQCKSQ   | Negative |
| P42889 | MEKVLALVLLTLAVAYAAPD  | Negative |
| P42889 | LALVLLTLAVAYAAPDPRGL  | Negative |
| P42889 | NGELCLNSAQCKSQCCQHDS  | Negative |
| P42889 | AVAYAAPDPRGLIINLDNGE  | Negative |
| P42889 | PDPRGLIINLDNGELCLNSA  | Negative |
| P42889 | RGLIINLDNGELCLNSAQCK  | Negative |
| P42889 | GLIINLDNGELCLNSAQCKS  | Negative |
| P42889 | TLAVAYAAPDPRGLIINLDN  | Negative |
| P42889 | EKVLALVLLTLAVAYAAPDP  | Negative |
| P42889 | LTLAVAYAAPDPRGLIINLD  | Negative |
| P42889 | VLALVLLTLAVAYAAPDPRG  | Negative |
| P42889 | PRGLIINLDNGELCLNSAQC  | Negative |
| P42889 | LAVAYAAPDPRGLIINLDNG  | Negative |
| P42889 | VAYAAPDPRGLIINLDNGEL  | Negative |
| P42889 | LLTLAVAYAAPDPRGLIINL  | Negative |
| P42889 | VLLTLAVAYAAPDPRGLIIN  | Negative |
| P42889 | DNGELCLNSAQCKSQCCQHD  | Negative |
| P42889 | NLDNGELCLNSAQCKSQCCQ  | Negative |
| P42889 | LDNGELCLNSAQCKSQCCQH  | Negative |
| P42889 | AAPDPRGLIINLDNGELCLN  | Negative |
| P42889 | APDPRGLIINLDNGELCLNS  | Negative |
| P42889 | AYAAPDPRGLIINLDNGELC  | Negative |
| P42889 | LIINLDNGELCLNSAQCKSQ  | Negative |
| P42889 | YAAPDPRGLIINLDNGELCL  | Negative |
| P42889 | INLDNGELCLNSAQCKSQCC  | Negative |
| P43077 | VHAAKVEILPAPQSVTWEND  | Negative |
| P43077 | MVLDKMIIFHLLLWLCNVVV  | Negative |
| P43077 | LDKMIIFHLLLWLCNVVVHA  | Negative |
| P43077 | FHLLLWLCNVVVHAAKVEIL  | Negative |
| P43077 | LCNVVVHAAKVEILPAPQSV  | Negative |
| P43077 | VVVHAAKVEILPAPQSVTWE  | Negative |
| P43077 | NVVVHAAKVEILPAPQSVTW  | Negative |

|        |                      |          |
|--------|----------------------|----------|
| P43077 | KMIIFHLLLWLCNVVVHAAK | Negative |
| P43077 | AKVEILPAPQSVTWENDTAI | Negative |
| P43077 | WLCNVVVHAAKVEILPAPQS | Negative |
| P43077 | CNVVVHAAKVEILPAPQSVT | Negative |
| P43077 | ILPAPQSVTWENDTAIIINP | Negative |
| P43077 | LLWLCNVVVHAAKVEILPAP | Negative |
| P43077 | MIIFHLLLWLCNVVVHAAKV | Negative |
| P43077 | APQSVTWENDTAIIINPRLL | Negative |
| P43077 | LPAPQSVTWENDTAIIINPR | Negative |
| P43077 | KVEILPAPQSVTWENDTAII | Negative |
| P43077 | LWLCNVVVHAAKVEILPAPQ | Negative |
| P43077 | LLLWLCNVVVHAAKVEILPA | Negative |
| P43077 | VVHAAKVEILPAPQSVTWEN | Negative |
| P43077 | VLDKMIIFHLLLWLCNVVVH | Negative |
| P43077 | IIFHLLLWLCNVVVHAAKVE | Negative |
| P43077 | AAKVEILPAPQSVTWENDTA | Negative |
| P43077 | DKMIIFHLLLWLCNVVVHAA | Negative |
| P43077 | PAPQSVTWENDTAIIINPRL | Negative |
| P43077 | HAAKVEILPAPQSVTWENDT | Negative |
| P43077 | HLLLWLCNVVVHAAKVEILP | Negative |
| P43077 | VEILPAPQSVTWENDTAIII | Negative |
| P43077 | EILPAPQSVTWENDTAIIIN | Negative |
| P43131 | PVKELSVNVNGQHIEQAAIF | Negative |
| P43131 | VSATSEPVKELSVNVNGQHI | Negative |
| P43131 | SEPVKELSVNVNGQHIEQAA | Negative |
| P43131 | LGTNVVSATSEPVKELSVNV | Negative |
| P43131 | MKTIRTGMMTLAALAVLGTN | Negative |
| P43131 | KELSVNVNGQHIEQAAIFDK | Negative |
| P43131 | ALAVLGTNVVSATSEPVKEL | Negative |
| P43131 | GMMTLAALAVLGTNVVSATS | Negative |
| P43131 | KTIRTGMMTLAALAVLGTNV | Negative |
| P43131 | IRTGMMTLAALAVLGTNVVS | Negative |
| P43131 | SATSEPVKELSVNVNGQHIE | Negative |
| P43131 | TGMMTLAALAVLGTNVVSAT | Negative |
| P43131 | AALAVLGTNVVSATSEPVKE | Negative |
| P43131 | RTGMMTLAALAVLGTNVVSA | Negative |
| P43131 | GTNVVSATSEPVKELSVNVN | Negative |
| P43131 | LAVLGTNVVSATSEPVKELS | Negative |
| P43131 | AVLGTNVVSATSEPVKELSV | Negative |
| P43131 | TNVVSATSEPVKELSVNVNG | Negative |
| P43131 | TSEPVKELSVNVNGQHIEQA | Negative |
| P43131 | TIRTGMMTLAALAVLGTNVV | Negative |
| P43131 | VVSATSEPVKELSVNVNGQH | Negative |
| P43131 | ATSEPVKELSVNVNGQHIEQ | Negative |
| P43131 | MMTLAALAVLGTNVVSATSE | Negative |
| P43131 | MTLAALAVLGTNVVSATSEP | Negative |

|        |                       |          |
|--------|-----------------------|----------|
| P43131 | NVVSATSEPVKELSVNVNGQ  | Negative |
| P43131 | VKELSVNVNGQHIEQAAIFD  | Negative |
| P43131 | LAALAVLGTVNVVSATSEPVK | Negative |
| P43131 | VLGTVNVVSATSEPVKELSVN | Negative |
| P43131 | EPVKELSVNVNGQHIEQAAI  | Negative |
| P43174 | LPCAWAGNVCGEKRAYCCSD  | Negative |
| P43174 | IKLLPCAWAGNVCGEKRAYC  | Negative |
| P43174 | AWAGNVCGEKRAYCCSDPGR  | Negative |
| P43174 | PCAWAGNVCGEKRAYCCSDP  | Negative |
| P43174 | NEKNVSFEFIGSTDEVDEIK  | Negative |
| P43174 | EVDEIKLLPCAWAGNVCGEK  | Negative |
| P43174 | EKNVSFEFIGSTDEVDEIKL  | Negative |
| P43174 | AGNVCGEKRAYCCSDPGRYC  | Negative |
| P43174 | FEFIGSTDEVDEIKLLPCAW  | Negative |
| P43174 | DEIKLLPCAWAGNVCGEKRA  | Negative |
| P43174 | MNNEKNVSFEFIGSTDEVDE  | Negative |
| P43174 | GNVCGEKRAYCCSDPGRYCP  | Negative |
| P43174 | EIKLLPCAWAGNVCGEKRAY  | Negative |
| P43174 | STDEVDEIKLLPCAWAGNVC  | Negative |
| P43174 | FIGSTDEVDEIKLLPCAWAG  | Negative |
| P43174 | GSTDEVDEIKLLPCAWAGNV  | Negative |
| P43174 | TDEVDEIKLLPCAWAGNVC   | Negative |
| P43174 | IGSTDEVDEIKLLPCAWAGN  | Negative |
| P43174 | NVSFEFIGSTDEVDEIKLLP  | Negative |
| P43174 | DEVDEIKLLPCAWAGNVCGE  | Negative |
| P43174 | WAGNVCGEKRAYCCSDPGRY  | Negative |
| P43174 | NNEKNVSFEFIGSTDEVDEI  | Negative |
| P43174 | VSFEFIGSTDEVDEIKLLPC  | Negative |
| P43174 | EFIGSTDEVDEIKLLPCAWA  | Negative |
| P43174 | LLPCAWAGNVCGEKRAYCCS  | Negative |
| P43174 | KLLPCAWAGNVCGEKRAYCC  | Negative |
| P43174 | KNVSFEFIGSTDEVDEIKLL  | Negative |
| P43174 | VDEIKLLPCAWAGNVCGEKR  | Negative |
| P43174 | CAWAGNVCGEKRAYCCSDPG  | Negative |
| P43302 | LTGLITGLAHAAGDAAAGQG  | Negative |
| P43302 | TLLLTLGITGLAHAAGDAAA  | Negative |
| P43302 | GLAHAAGDAAAGQGKAAVCG  | Negative |
| P43302 | TGLAHAAGDAAAGQGKAAVC  | Negative |
| P43302 | ALVTLLLTLGITGLAHAAGD  | Negative |
| P43302 | ITGLAHAAGDAAAGQGKAAV  | Negative |
| P43302 | LVTLLLTLGITGLAHAAGDA  | Negative |
| P43302 | GKAAVCGACHGPDGNSAAPN  | Negative |
| P43302 | AHAAGDAAAGQGKAAVCGAC  | Negative |
| P43302 | MNKALVTLLLTLGITGLAHA  | Negative |
| P43302 | GQGKAAVCGACHGPDGNSAA  | Negative |
| P43302 | AGDAAAGQGKAAVCGACHGP  | Negative |

|        |                       |          |
|--------|-----------------------|----------|
| P43302 | KAAVCGACHGPDGNSAAPNF  | Negative |
| P43302 | AAGQGKAAVCGACHGPDGNS  | Negative |
| P43302 | AGQGKAAVCGACHGPDGNSA  | Negative |
| P43302 | HAAGDAAAGQGKAAVCGACH  | Negative |
| P43302 | LAHAAGDAAAGQGKAAVCGA  | Negative |
| P43302 | LLTLGITGLAHAAGDAAAG   | Negative |
| P43302 | TLGITGLAHAAGDAAAGQGK  | Negative |
| P43302 | LLTLGITGLAHAAGDAAAGQ  | Negative |
| P43302 | NKALVTLTLLTLGITGLAHAA | Negative |
| P43302 | GITGLAHAAGDAAAGQGKAA  | Negative |
| P43302 | KALVTLTLLTLGITGLAHAAG | Negative |
| P43302 | AAAGQGKAAVCGACHGPDGN  | Negative |
| P43302 | DAAAGQGKAAVCGACHGPDG  | Negative |
| P43302 | GDAAGQGKAAVCGACHGPD   | Negative |
| P43302 | AAGDAAAGQGKAAVCGACHG  | Negative |
| P43302 | LGITGLAHAAGDAAAGQGKA  | Negative |
| P43302 | QGKAAVCGACHGPDGNSAAP  | Negative |
| P43306 | LSFSQHWSHGWYPGGKREID  | Negative |
| P43306 | ALLLCLQAQLSFSQHWSHGW  | Negative |
| P43306 | QAQLSFSQHWSHGWYPGGKR  | Negative |
| P43306 | LLLCLQAQLSFSQHWSHGWY  | Negative |
| P43306 | LVAALLLCLQAQLSFSQHS   | Negative |
| P43306 | HWSHGWYPGGKREIDSYSSP  | Negative |
| P43306 | CLQAQLSFSQHWSHGWYPGG  | Negative |
| P43306 | QLSFSQHWSHGWYPGGKREI  | Negative |
| P43306 | SQHWSHGWYPGGKREIDSYS  | Negative |
| P43306 | AALLLCLQAQLSFSQHWSHG  | Negative |
| P43306 | LLVAALLLCLQAQLSFSQHW  | Negative |
| P43306 | SVCRLLLVAALLLCLQAQLS  | Negative |
| P43306 | VSVCRLLLVAALLLCLQAQL  | Negative |
| P43306 | VCRLLLVAALLLCLQAQLSF  | Negative |
| P43306 | LLVAALLLCLQAQLSFSQH   | Negative |
| P43306 | RLLVAALLLCLQAQLSFSQ   | Negative |
| P43306 | AQLSFSQHWSHGWYPGGKRE  | Negative |
| P43306 | LCLQAQLSFSQHWSHGWYPG  | Negative |
| P43306 | MVSVCRLLLVAALLLCLQAQ  | Negative |
| P43306 | FSQHWSHGWYPGGKREIDSY  | Negative |
| P43306 | SHGWYPGGKREIDSYSSPEI  | Negative |
| P43306 | GWYPGGKREIDSYSSPEISG  | Negative |
| P43306 | LLCLQAQLSFSQHWSHGWYP  | Negative |
| P43306 | WSHGWYPGGKREIDSYSSPE  | Negative |
| P43306 | QHWSHGWYPGGKREIDSYSS  | Negative |
| P43306 | HGWYPGGKREIDSYSSPEIS  | Negative |
| P43306 | CRLLLVAALLLCLQAQLSFS  | Negative |
| P43306 | SFSQHWSHGWYPGGKREIDS  | Negative |
| P43306 | LQAQLSFSQHWSHGWYPGGK  | Negative |

|        |                      |          |
|--------|----------------------|----------|
| P43379 | ALGLSLTFGLFSPAQAAPDT | Negative |
| P43379 | SPAQAAPDTSVSNKQNFSTD | Negative |
| P43379 | ALALGLSLTFGLFSPAQAAP | Negative |
| P43379 | SLTFGLFSPAQAAPDTSVSN | Negative |
| P43379 | PDTSVSNKQNFSTDVIYQIF | Negative |
| P43379 | LTFGLFSPAQAAPDTSVSNK | Negative |
| P43379 | DTSVSNKQNFSTDVIYQIFT | Negative |
| P43379 | FSPAQAAPDTSVSNKQNFST | Negative |
| P43379 | TFGLFSPAQAAPDTSVSNKQ | Negative |
| P43379 | MKKFLKSTAALALGLSLTFG | Negative |
| P43379 | APDTSVSNKQNFSTDVIYQI | Negative |
| P43379 | TAALALGLSLTFGLFSPAQA | Negative |
| P43379 | LALGLSLTFGLFSPAQAAPD | Negative |
| P43379 | LFSPAQAAPDTSVSNKQNF  | Negative |
| P43379 | PAQAAPDTSVSNKQNFSTDV | Negative |
| P43379 | AAPDTSVSNKQNFSTDVIYQ | Negative |
| P43379 | LSLTFGLFSPAQAAPDTSVS | Negative |
| P43379 | LKSTAALALGLSLTFGLFSP | Negative |
| P43379 | AALALGLSLTFGLFSPAQAA | Negative |
| P43379 | AQAAPDTSVSNKQNFSTDVI | Negative |
| P43379 | GLSLTFGLFSPAQAAPDTSV | Negative |
| P43379 | QAAPDTSVSNKQNFSTDVIY | Negative |
| P43379 | KFLKSTAALALGLSLTFGLF | Negative |
| P43379 | GLFSPAQAAPDTSVSNKQNF | Negative |
| P43379 | KSTAALALGLSLTFGLFSPA | Negative |
| P43379 | STAALALGLSLTFGLFSPAQ | Negative |
| P43379 | FGLFSPAQAAPDTSVSNKQN | Negative |
| P43379 | KKFLKSTAALALGLSLTFGL | Negative |
| P43379 | FLKSTAALALGLSLTFGLFS | Negative |
| P43478 | LSAVSQAASMQPPIAKPGET | Negative |
| P43478 | QAASMQPPIAKPGETWILQA | Negative |
| P43478 | SQAASMQPPIAKPGETWILQ | Negative |
| P43478 | PIPAISMLLLSAVSQAASM  | Negative |
| P43478 | LLLSAVSQAASMQPPIAKPG | Negative |
| P43478 | SMQPPIAKPGETWILQAKRS | Negative |
| P43478 | FPIPAISMLLLSAVSQAASM | Negative |
| P43478 | ASMQPPIAKPGETWILQAKR | Negative |
| P43478 | ISIVAFPIPAISMLLLSAVS | Negative |
| P43478 | MQPPIAKPGETWILQAKRSD | Negative |
| P43478 | PISIVAFPIPAISMLLLSAV | Negative |
| P43478 | MLLLSAVSQAASMQPPIAKP | Negative |
| P43478 | SAVSQAASMQPPIAKPGETW | Negative |
| P43478 | KPISIVAFPIPAISMLLLSA | Negative |
| P43478 | PAISMLLLSAVSQAASMQPP | Negative |
| P43478 | SIVAFPIPAISMLLLSAVSQ | Negative |
| P43478 | SMLLSAVSQAASMQPPIAK  | Negative |

|        |                       |          |
|--------|-----------------------|----------|
| P43478 | LLSAVSQAASMQPPIAKPGE  | Negative |
| P43478 | PPIAKPGETWILQAKRSDEF  | Negative |
| P43478 | AISMLLLLSAVSQAASMQPPI | Negative |
| P43478 | VAFPIPAISMLLLLSAVSQAA | Negative |
| P43478 | ISMLLLLSAVSQAASMQPPIA | Negative |
| P43478 | QPPIAKPGETWILQAKRSDE  | Negative |
| P43478 | MKPISIVAFPIPAISMLLLLS | Negative |
| P43478 | AVSQAASMQPPIAKPGETWI  | Negative |
| P43478 | AFPIPAISMLLLLSAVSQAAS | Negative |
| P43478 | AASMQPPIAKPGETWILQAK  | Negative |
| P43478 | VSQAASMQPPIAKPGETWIL  | Negative |
| P43478 | IVAFPIPAISMLLLLSAVSQA | Negative |
| P43497 | ISQITDGQIQATTTATTEAT  | Negative |
| P43497 | AESAAAISQITDGQIQATTT  | Negative |
| P43497 | FVALANFVAAESAAAISQIT  | Negative |
| P43497 | FSTVASVAFVALANFVAAES  | Negative |
| P43497 | QFSTVASVAFVALANFVAAE  | Negative |
| P43497 | STVASVAFVALANFVAAESA  | Negative |
| P43497 | AAISQITDGQIQATTTATTE  | Negative |
| P43497 | SAAAISQITDGQIQATTTAT  | Negative |
| P43497 | ASVAFVALANFVAAESAAAI  | Negative |
| P43497 | SQITDGQIQATTTATTEATT  | Negative |
| P43497 | NFVAAESAAAISQITDGQIQ  | Negative |
| P43497 | SVAFVALANFVAAESAAAIS  | Negative |
| P43497 | AFVALANFVAAESAAAISQI  | Negative |
| P43497 | VAFVALANFVAAESAAAISQ  | Negative |
| P43497 | FVAAESAAAISQITDGQIQ   | Negative |
| P43497 | ALANFVAAESAAAISQITDG  | Negative |
| P43497 | ESAAAISQITDGQIQATTTA  | Negative |
| P43497 | VAAESAAAISQITDGQIQAT  | Negative |
| P43497 | ITDGQIQATTTATTEATTTA  | Negative |
| P43497 | TDGQIQATTTATTEATTAA   | Negative |
| P43497 | AAESAAAISQITDGQIQATT  | Negative |
| P43497 | LANFVAAESAAAISQITDGQ  | Negative |
| P43497 | ANFVAAESAAAISQITDGQI  | Negative |
| P43497 | MQFSTVASVAFVALANFVAA  | Negative |
| P43497 | AISQITDGQIQATTTATTEA  | Negative |
| P43497 | AAAISQITDGQIQATTTATT  | Negative |
| P43497 | VALANFVAAESAAAISQITD  | Negative |
| P43497 | QITDGQIQATTTATTEATTT  | Negative |
| P43497 | TVASVAFVALANFVAAESAA  | Negative |
| P43652 | QPRDIENFNSTQKFIEDNIE  | Negative |
| P43652 | MKLLKLTGFIFFLFFLTESL  | Negative |
| P43652 | IFFLFFLTESLTLPTQPRDI  | Negative |
| P43652 | ESLTLPTQPRDIENFNSTQK  | Negative |
| P43652 | TESLTLPTQPRDIENFNSTQ  | Negative |

|        |                       |          |
|--------|-----------------------|----------|
| P43652 | IENFNSTQKFIEDNIEYITI  | Negative |
| P43652 | LKLTGFIFFLFFLTESLTLP  | Negative |
| P43652 | PRDIENFNSTQKFIEDNIEY  | Negative |
| P43652 | DIENFNSTQKFIEDNIEYIT  | Negative |
| P43652 | LTLPQTQPRDIENFNSTQKFI | Negative |
| P43652 | RDIENFNSTQKFIEDNIEYI  | Negative |
| P43652 | TQPRDIENFNSTQKFIEDNI  | Negative |
| P43652 | FLTESLTLPTQPRDIENFNS  | Negative |
| P43652 | LPTQPRDIENFNSTQKFIED  | Negative |
| P43652 | KLTGFIFFLFFLTESLTLPT  | Negative |
| P43652 | GFIFFLFFLTESLTLPTQPR  | Negative |
| P43652 | SLTLPTQPRDIENFNSTQKF  | Negative |
| P43652 | LFFLTESLTLPTQPRDIENF  | Negative |
| P43652 | TLPTQPRDIENFNSTQKFIE  | Negative |
| P43652 | FLFFLTESLTLPTQPRDIEN  | Negative |
| P43652 | FIFLFFLTESLTLPTQPRD   | Negative |
| P43652 | LTGFIFFLFFLTESLTLPTQ  | Negative |
| P43652 | FFLTESLTLPTQPRDIENFN  | Negative |
| P43652 | LTESLTLPTQPRDIENFNST  | Negative |
| P43652 | KLLKLTGFIFFLFFLTESLT  | Negative |
| P43652 | PTQPRDIENFNSTQKFIEDN  | Negative |
| P43652 | ENFNSTQKFIEDNIEYITH   | Negative |
| P43652 | LLKLTGFIFFLFFLTESLTL  | Negative |
| P43652 | FFLFFLTESLTLPTQPRDIE  | Negative |
| P43843 | ADLPNITILATGGTIAGSGQ  | Negative |
| P43843 | LPNITILATGGTIAGSGQSS  | Negative |
| P43843 | LATGGTIAGSGQSSVNSAYK  | Negative |
| P43843 | VSIANAADLPNITILATGGT  | Negative |
| P43843 | DLPNITILATGGTIAGSGQS  | Negative |
| P43843 | TILATGGTIAGSGQSSVNSA  | Negative |
| P43843 | MKLTKLALCTLFGLGVSIAN  | Negative |
| P43843 | KLALCTLFGLGVSIANAADL  | Negative |
| P43843 | GVSIANAADLPNITILATGG  | Negative |
| P43843 | NAADLPNITILATGGTIAGS  | Negative |
| P43843 | CTLFGLGVSIANAADLPNIT  | Negative |
| P43843 | ANAADLPNITILATGGTIAG  | Negative |
| P43843 | TLFGLGVSIANAADLPNITI  | Negative |
| P43843 | IANAADLPNITILATGGTIA  | Negative |
| P43843 | GLGVSIANAADLPNITILAT  | Negative |
| P43843 | TKLALCTLFGLGVSIANAAD  | Negative |
| P43843 | ITILATGGTIAGSGQSSVNS  | Negative |
| P43843 | FGLGVSIANAADLPNITILA  | Negative |
| P43843 | LFGLGVSIANAADLPNITIL  | Negative |
| P43843 | LCTLFGLGVSIANAADLPNI  | Negative |
| P43843 | SIANAADLPNITILATGGTI  | Negative |
| P43843 | KLTKLALCTLFGLGVSIANA  | Negative |

|        |                       |          |
|--------|-----------------------|----------|
| P43843 | AADLPNITILATGGTIAGSG  | Negative |
| P43843 | NITILATGGTIAGSGQSSVN  | Negative |
| P43843 | LGVSIANAADLPNITILATG  | Negative |
| P43843 | LTKLALCTLFGLGVSIANAA  | Negative |
| P43843 | PNITILATGGTIAGSGQSSV  | Negative |
| P43843 | LALCTLFGLGVSIANAADLP  | Negative |
| P43843 | ILATGGTIAGSGQSSVNSAY  | Negative |
| P43972 | ACAKDAPEMTKSSAQIAEMQ  | Negative |
| P43972 | LPAFAAAVVLSACAKDAPEM  | Negative |
| P43972 | DAPEMTKSSAQIAEMQTLPT  | Negative |
| P43972 | MNLTKLLPAFAAAVVLSACA  | Negative |
| P43972 | KLLPAFAAAVVLSACAKDAP  | Negative |
| P43972 | TKSSAQIAEMQTLPTITDKT  | Negative |
| P43972 | SACAKDAPEMTKSSAQIAEM  | Negative |
| P43972 | AKDAPEMTKSSAQIAEMQTL  | Negative |
| P43972 | MTKSSAQIAEMQTLPTITDK  | Negative |
| P43972 | TKLLPAFAAAVVLSACAKDA  | Negative |
| P43972 | EMTKSSAQIAEMQTLPTITD  | Negative |
| P43972 | LSACAKDAPEMTKSSAQIAE  | Negative |
| P43972 | KSSAQIAEMQTLPTITDKTV  | Negative |
| P43972 | CAKDAPEMTKSSAQIAEMQT  | Negative |
| P43972 | AAAVVLSACAKDAPEMTKSS  | Negative |
| P43972 | AVVLSACAKDAPEMTKSSAQ  | Negative |
| P43972 | KDAPEMTKSSAQIAEMQTLPT | Negative |
| P43972 | VVLSACAKDAPEMTKSSAQI  | Negative |
| P43972 | AFAAAVVLSACAKDAPEMTK  | Negative |
| P43972 | NLTKLLPAFAAAVVLSACAK  | Negative |
| P43972 | PAFAAAVVLSACAKDAPEMT  | Negative |
| P43972 | LTKLLPAFAAAVVLSACAKD  | Negative |
| P43972 | PEMTKSSAQIAEMQTLPTIT  | Negative |
| P43972 | SSAQIAEMQTLPTITDKTVV  | Negative |
| P43972 | APEMTKSSAQIAEMQTLPTI  | Negative |
| P43972 | AAVVLSACAKDAPEMTKSSA  | Negative |
| P43972 | VLSACAKDAPEMTKSSAQIA  | Negative |
| P43972 | FAAAVVLSACAKDAPEMTKS  | Negative |
| P43972 | SAQIAEMQTLPTITDKTVVY  | Negative |
| P44276 | SSQDEYVVKFGHEQTETYPE  | Negative |
| P44276 | ASSQDEYVVKFGHEQTETYP  | Negative |
| P44276 | PASSQDEYVVKFGHEQTETY  | Negative |
| P44276 | AHNVWLEPASSQDEYVVKFG  | Negative |
| P44276 | HNVWLEPASSQDEYVVKFGH  | Negative |
| P44276 | KIAVGLTALLGMSVANAHNV  | Negative |
| P44276 | VWLEPASSQDEYVVKFGHEQ  | Negative |
| P44276 | LEPASSQDEYVVKFGHEQTE  | Negative |
| P44276 | WLEPASSQDEYVVKFGHEQT  | Negative |
| P44276 | LKKIAVGLTALLGMSVANAH  | Negative |



|        |                       |          |
|--------|-----------------------|----------|
| P44276 | GLTALLGMSVANAHNVWLEP  | Negative |
| P44276 | MELKKIAVGLTALLGMSVAN  | Negative |
| P44276 | ALLGMSVANAHNVWLEPASS  | Negative |
| P44276 | TALLGMSVANAHNVWLEPAS  | Negative |
| P44276 | KKIAVGLTALLGMSVANAHN  | Negative |
| P44276 | NVWLEPASSQDEYVVKFGHE  | Negative |
| P44276 | VANAHNVWLEPASSQDEYVV  | Negative |
| P44276 | LGMSVANAHNVWLEPASSQD  | Negative |
| P44276 | VGLTALLGMSVANAHNVWLE  | Negative |
| P44276 | ANAHNVWLEPASSQDEYVVK  | Negative |
| P44276 | LTALLGMSVANAHNVWLEPA  | Negative |
| P44276 | NAHNVWLEPASSQDEYVVKF  | Negative |
| P44276 | GMSVANAHNVWLEPASSQDE  | Negative |
| P44276 | MSVANAHNVWLEPASSQDEY  | Negative |
| P44276 | IAVGLTALLGMSVANAHNVW  | Negative |
| P44276 | SVANAHNVWLEPASSQDEYV  | Negative |
| P44276 | EPASSQDEYVVKFGHEQTET  | Negative |
| P44276 | LLGMSVANAHNVWLEPASSQ  | Negative |
| P44276 | ELKKIAVGLTALLGMSVANA  | Negative |
| P44526 | LKISAIASAALLSAPMMANAD | Negative |
| P44526 | LLSAPMMANADV LASVKPLG | Negative |
| P44526 | ISAIASAALLSAPMMANADVL | Negative |
| P44526 | SVKPLGFIVSSIADGVTGTQ  | Negative |
| P44526 | KISAIASAALLSAPMMANADV | Negative |
| P44526 | DVLASVKPLGFIVSSIADGV  | Negative |
| P44526 | MKKLLKISAIASAALLSAPMM | Negative |
| P44526 | MANADV LASVKPLGFIVSSI | Negative |
| P44526 | VKPLGFIVSSIADGVTGTQV  | Negative |
| P44526 | SAALLSAPMMANADV LASVK | Negative |
| P44526 | NADV LASVKPLGFIVSSIAD | Negative |
| P44526 | SAISAALLSAPMMANADVLA  | Negative |
| P44526 | AALLSAPMMANADV LASVKP | Negative |
| P44526 | KPLGFIVSSIADGVTGTQVL  | Negative |
| P44526 | MMANADV LASVKPLGFIVSS | Negative |
| P44526 | ANADV LASVKPLGFIVSSIA | Negative |
| P44526 | ADV LASVKPLGFIVSSIADG | Negative |
| P44526 | LSAPMMANADV LASVKPLGF | Negative |
| P44526 | LLKISAIASAALLSAPMMANA | Negative |
| P44526 | SAPMMANADV LASVKPLGFI | Negative |
| P44526 | ASVKPLGFIVSSIADGVTGT  | Negative |
| P44526 | ISAALLSAPMMANADV LASV | Negative |
| P44526 | APMMANADV LASVKPLGFIV | Negative |
| P44526 | ALLSAPMMANADV LASVKPL | Negative |
| P44526 | PMMANADV LASVKPLGFIVS | Negative |
| P44526 | VLASVKPLGFIVSSIADGVT  | Negative |
| P44526 | KKLLKISAIASAALLSAPMMA | Negative |

|        |                       |          |
|--------|-----------------------|----------|
| P44526 | LASVKPLGFIVSSIADGVTG  | Negative |
| P44526 | KLLKISAI SAALLSAPMMAN | Negative |
| P44544 | NAQTYPDLPVGIKGGTGALI  | Negative |
| P44544 | TKTALCTALFATFTFSANAQ  | Negative |
| P44544 | YPDLPVGIKGGTGALIGDTV  | Negative |
| P44544 | LPVGIKGGTGALIGDTVYVG  | Negative |
| P44544 | VGIKGGTGALIGDTVYVGLG  | Negative |
| P44544 | ATFTFSANAQTYPDLPVGIK  | Negative |
| P44544 | PDLPVGIKGGTGALIGDTVY  | Negative |
| P44544 | FTFSANAQTYPDLPVGIKGG  | Negative |
| P44544 | TALCTALFATFTFSANAQTY  | Negative |
| P44544 | TFTFSANAQTYPDLPVGIKG  | Negative |
| P44544 | ALCTALFATFTFSANAQTYP  | Negative |
| P44544 | SANAQTYPDLPVGIKGGTGA  | Negative |
| P44544 | TFSANAQTYPDLPVGIKGGT  | Negative |
| P44544 | MKLTKTALCTALFATFTFSA  | Negative |
| P44544 | QTYPDLPVGIKGGTGALIGD  | Negative |
| P44544 | TYPDLPVGIKGGTGALIGDT  | Negative |
| P44544 | ANAQTYPDLPVGIKGGTGAL  | Negative |
| P44544 | AQTYPDLPVGIKGGTGALIG  | Negative |
| P44544 | FATFTFSANAQTYPDLPVGI  | Negative |
| P44544 | LTKTALCTALFATFTFSANA  | Negative |
| P44544 | ALFATFTFSANAQTYPDLPV  | Negative |
| P44544 | CTALFATFTFSANAQTYPDLP | Negative |
| P44544 | KLTKTALCTALFATFTFSAN  | Negative |
| P44544 | KTALCTALFATFTFSANAQT  | Negative |
| P44544 | TALFATFTFSANAQTYPDLP  | Negative |
| P44544 | FSANAQTYPDLPVGIKGGTG  | Negative |
| P44544 | LFATFTFSANAQTYPDLPVG  | Negative |
| P44544 | DLPVGIKGGTGALIGDTVYV  | Negative |
| P44544 | PVGIKGGTGALIGDTVYVGL  | Negative |
| P44569 | PQAHKAVELSILHINDHHSY  | Negative |
| P44569 | FTSVALAKEAPQAHKAVELS  | Negative |
| P44569 | KEAPQAHKAVELSILHINDH  | Negative |
| P44569 | SFALSFAFAMLFTSVALAKEA | Negative |
| P44569 | LSKKSASFALSFAFAMLFTSV | Negative |
| P44569 | LFTSVALAKEAPQAHKAVEL  | Negative |
| P44569 | AKEAPQAHKAVELSILHIND  | Negative |
| P44569 | AMLFTSVALAKEAPQAHKAV  | Negative |
| P44569 | KKSASFALSFAFAMLFTSVAL | Negative |
| P44569 | KSASFALSFAFAMLFTSVALA | Negative |
| P44569 | SVALAKEAPQAHKAVELSIL  | Negative |
| P44569 | SAFAMLFTSVALAKEAPQAH  | Negative |
| P44569 | LAKEAPQAHKAVELSILHIN  | Negative |
| P44569 | QAHKAVELSILHINDHHSYL  | Negative |
| P44569 | LSAFAMLFTSVALAKEAPQA  | Negative |

|        |                      |          |
|--------|----------------------|----------|
| P44569 | ALAKEAPQAHKAVELSILHI | Negative |
| P44569 | TSVALAKEAPQAHKAVELSI | Negative |
| P44569 | MLFTSVALAKEAPQAHKAVE | Negative |
| P44569 | SASFALSAFAMLFTSVALAK | Negative |
| P44569 | AFAMLFTSVALAKEAPQAHK | Negative |
| P44569 | FALSAFAMLFTSVALAKEAP | Negative |
| P44569 | ASFALSAFAMLFTSVALAKE | Negative |
| P44569 | LLSKKSASFALSAFAMLFTS | Negative |
| P44569 | SKKSASFALSAFAMLFTSVA | Negative |
| P44569 | EAPQAHKAVELSILHINDHH | Negative |
| P44569 | MLLSKKSASFALSAFAMLFT | Negative |
| P44569 | FAMLFTSVALAKEAPQAHKA | Negative |
| P44569 | APQAHKAVELSILHINDHHS | Negative |
| P44569 | VALAKEAPQAHKAVELSILH | Negative |
| P44654 | AGLFTALFAGSLMASDAPAV | Negative |
| P44654 | PAVGKDLTQAAENIPPAFHN | Negative |
| P44654 | AGSLMASDAPAVGKDLTQAA | Negative |
| P44654 | LFAGSLMASDAPAVGKDLTQ | Negative |
| P44654 | LFTALFAGSLMASDAPAVGK | Negative |
| P44654 | SLMASDAPAVGKDLTQAAEN | Negative |
| P44654 | APAVGKDLTQAAENIPPAFH | Negative |
| P44654 | QVSKILAGLFTALFAGSLMA | Negative |
| P44654 | MASDAPAVGKDLTQAAENIP | Negative |
| P44654 | VSKILAGLFTALFAGSLMAS | Negative |
| P44654 | FTALFAGSLMASDAPAVGKD | Negative |
| P44654 | SKILAGLFTALFAGSLMASD | Negative |
| P44654 | ILAGLFTALFAGSLMASDAP | Negative |
| P44654 | FAGSLMASDAPAVGKDLTQA | Negative |
| P44654 | GSLMASDAPAVGKDLTQAAE | Negative |
| P44654 | KQVSKILAGLFTALFAGSLM | Negative |
| P44654 | KILAGLFTALFAGSLMASDA | Negative |
| P44654 | LMASDAPAVGKDLTQAAENI | Negative |
| P44654 | SDAPAVGKDLTQAAENIPPA | Negative |
| P44654 | TALFAGSLMASDAPAVGKDL | Negative |
| P44654 | GLFTALFAGSLMASDAPAVG | Negative |
| P44654 | MINMTKQVSKILAGLFTALF | Negative |
| P44654 | DAPAVGKDLTQAAENIPPAF | Negative |
| P44654 | INMTKQVSKILAGLFTALFA | Negative |
| P44654 | NMTKQVSKILAGLFTALFAG | Negative |
| P44654 | ALFAGSLMASDAPAVGKDLT | Negative |
| P44654 | ASDAPAVGKDLTQAAENIPP | Negative |
| P44654 | MTKQVSKILAGLFTALFAGS | Negative |
| P44654 | TKQVSKILAGLFTALFAGSL | Negative |
| P44737 | SAQDTIALAVSTLDNPFFVT | Negative |
| P44737 | QDTIALAVSTLDNPFFVTLK | Negative |
| P44737 | ALTSVLLGLAVSSSASAQD  | Negative |

|        |                      |          |
|--------|----------------------|----------|
| P44737 | KKLTALTSAVLLGLAVSSSA | Negative |
| P44737 | SSSASAQDTIALAVSTLDNP | Negative |
| P44737 | LGLAVSSSASAQDTIALAVS | Negative |
| P44737 | SASAQDTIALAVSTLDNPFF | Negative |
| P44737 | AVSTLDNPFFVTLKDGAQKK | Negative |
| P44737 | VSSSASAQDTIALAVSTLDN | Negative |
| P44737 | LAVSTLDNPFFVTLKDGAQK | Negative |
| P44737 | DTIALAVSTLDNPFFVTLKD | Negative |
| P44737 | AVLLGLAVSSSASAQDTIAL | Negative |
| P44737 | ALAVSTLDNPFFVTLKDGAQ | Negative |
| P44737 | VLLGLAVSSSASAQDTIALA | Negative |
| P44737 | TIALAVSTLDNPFFVTLKDG | Negative |
| P44737 | LTALTSAVLLGLAVSSSASA | Negative |
| P44737 | GLAVSSSASAQDTIALAVST | Negative |
| P44737 | LLGLAVSSSASAQDTIALAV | Negative |
| P44737 | SSASAQDTIALAVSTLDNPF | Negative |
| P44737 | TSAVLLGLAVSSSASAQDTI | Negative |
| P44737 | KLTALTSAVLLGLAVSSSAS | Negative |
| P44737 | TALTSAVLLGLAVSSSASAQ | Negative |
| P44737 | AVSSSASAQDTIALAVSTLD | Negative |
| P44737 | AQDTIALAVSTLDNPFFVTL | Negative |
| P44737 | LTSAVLLGLAVSSSASAQDT | Negative |
| P44737 | LAVSSSASAQDTIALAVSTL | Negative |
| P44737 | IALAVSTLDNPFFVTLKDGA | Negative |
| P44737 | ASAQDTIALAVSTLDNPFFV | Negative |
| P44737 | MKKLTALTSAVLLGLAVSSS | Negative |
| P44883 | SASFAADNRIGVTIYKYDDN | Negative |
| P44883 | ALGSASASFAADNRIGVTIY | Negative |
| P44883 | ADNRIGVTIYKYDDNFMSLM | Negative |
| P44883 | AADNRIGVTIYKYDDNFMSL | Negative |
| P44883 | AVLSTVAFAIALGSASASFA | Negative |
| P44883 | FAADNRIGVTIYKYDDNFMS | Negative |
| P44883 | TAVLSTVAFAIALGSASASF | Negative |
| P44883 | DNRIGVTIYKYDDNFMSLMR | Negative |
| P44883 | IGVTIYKYDDNFMSLMRKEI | Negative |
| P44883 | STVAFAIALGSASASFAADN | Negative |
| P44883 | ASFAADNRIGVTIYKYDDNF | Negative |
| P44883 | LGSASASFAADNRIGVTIYK | Negative |
| P44883 | RIGVTIYKYDDNFMSLMRKE | Negative |
| P44883 | FAIALGSASASFAADNRIGV | Negative |
| P44883 | IALGSASASFAADNRIGVTI | Negative |
| P44883 | AFAIALGSASASFAADNRIG | Negative |
| P44883 | MKKTAVLSTVAFAIALGSAS | Negative |
| P44883 | ASASFAADNRIGVTIYKYDD | Negative |
| P44883 | NRIGVTIYKYDDNFMSLMRK | Negative |
| P44883 | GSASASFAADNRIGVTIYKY | Negative |

|        |                      |          |
|--------|----------------------|----------|
| P44883 | SFAADNRIGVTIYKYDDNFM | Negative |
| P44883 | AIALGSASASFAADNRIGVT | Negative |
| P44883 | VLSTVAFAlALGSASASFAA | Negative |
| P44883 | LSTVAFAlALGSASASFAAD | Negative |
| P44883 | TVAFAlALGSASASFAADNR | Negative |
| P44883 | KKTAVLSTVAFAlALGSASA | Negative |
| P44883 | GVTIYKYDDNFMSLMRKEID | Negative |
| P44883 | SASASFAADNRIGVTIYKYD | Negative |
| P44883 | KTAVLSTVAFAlALGSASAS | Negative |
| P45091 | SAQELTFAMQPSYPPFETTN | Negative |
| P45091 | FAMQPSYPPFETTNAKGEII | Negative |
| P45091 | KTLLTAILLGASVAASAQEL | Negative |
| P45091 | ASVAASAQELTFAMQPSYPP | Negative |
| P45091 | TAILLGASVAASAQELTFAM | Negative |
| P45091 | SVAASAQELTFAMQPSYPPF | Negative |
| P45091 | LGASVAASAQELTFAMQPSY | Negative |
| P45091 | AQELTFAMQPSYPPFETTNA | Negative |
| P45091 | MKKTLLTAILLGASVAASAQ | Negative |
| P45091 | KKTLLTAILLGASVAASAQE | Negative |
| P45091 | AMQPSYPPFETTNAKGEIIG | Negative |
| P45091 | ELTFAMQPSYPPFETTNAKG | Negative |
| P45091 | ILLGASVAASAQELTFAMQP | Negative |
| P45091 | PSYPPFETTNAKGEIIGFDV | Negative |
| P45091 | LTFAMQPSYPPFETTNAKGE | Negative |
| P45091 | LTAILLGASVAASAQELTFA | Negative |
| P45091 | VAASAQELTFAMQPSYPPFE | Negative |
| P45091 | SYPPFETTNAKGEIIGFDVD | Negative |
| P45091 | LLGASVAASAQELTFAMQPS | Negative |
| P45091 | QELTFAMQPSYPPFETTNAK | Negative |
| P45091 | QPSYPPFETTNAKGEIIGFD | Negative |
| P45091 | YPPFETTNAKGEIIGFDVDV | Negative |
| P45091 | AILLGASVAASAQELTFAMQ | Negative |
| P45091 | GASVAASAQELTFAMQPSYP | Negative |
| P45091 | MQPSYPPFETTNAKGEIIGF | Negative |
| P45091 | AASAQELTFAMQPSYPPFET | Negative |
| P45091 | ASAQELTFAMQPSYPPFETT | Negative |
| P45091 | TLLTAILLGASVAASAQELT | Negative |
| P45091 | TFAMQPSYPPFETTNAKGEI | Negative |
| P45323 | FSFAASAKVTVFAAASMTDA | Negative |
| P45323 | AAASMTDALQQVAKDYAKQN | Negative |
| P45323 | TVFAAASMTDALQQVAKDYA | Negative |
| P45323 | ISTALLIAGLGFSFAASAKV | Negative |
| P45323 | AKVTVFAAASMTDALQQVAK | Negative |
| P45323 | GFSFAASAKVTVFAAASMTD | Negative |
| P45323 | FAAASMTDALQQVAKDYAKQ | Negative |
| P45323 | SFAASAKVTVFAAASMTDAL | Negative |

|        |                       |          |
|--------|-----------------------|----------|
| P45323 | KLTKISTALLIAGLGFSFAA  | Negative |
| P45323 | ASAKVTVFAAASMTDALQQV  | Negative |
| P45323 | IAGLGFSFAASAKVTVFAAA  | Negative |
| P45323 | TKISTALLIAGLGFSFAASA  | Negative |
| P45323 | GLGFSFAASAKVTVFAAASM  | Negative |
| P45323 | KISTALLIAGLGFSFAASAK  | Negative |
| P45323 | MKKLTKISTALLIAGLGFSF  | Negative |
| P45323 | LTKISTALLIAGLGFSFAAS  | Negative |
| P45323 | LLIAGLGFSFAASAKVTVFA  | Negative |
| P45323 | LGFSFAASAKVTVFAAASMT  | Negative |
| P45323 | TALLIAGLGFSFAASAKVTV  | Negative |
| P45323 | KVTVFAAASMTDALQQVAKD  | Negative |
| P45323 | SAKVTVFAAASMTDALQQVA  | Negative |
| P45323 | FAASAKVTVFAAASMTDALQ  | Negative |
| P45323 | LIAGLGFSFAASAKVTVFAA  | Negative |
| P45323 | AGLGFSFAASAKVTVFAAAS  | Negative |
| P45323 | AASAKVTVFAAASMTDALQQ  | Negative |
| P45323 | KKLTKISTALLIAGLGFSFA  | Negative |
| P45323 | VTVFAAASMTDALQQVAKDY  | Negative |
| P45323 | STALLIAGLGFSFAASAKVT  | Negative |
| P45323 | VFAAASMTDALQQVAKDYAK  | Negative |
| P45354 | YASTPDFPQHHKTVFGTVTI  | Negative |
| P45354 | ASTPDFPQHHKTVFGTVTIE  | Negative |
| P45354 | HHKTVFGTVTIEKTTADKMT  | Negative |
| P45354 | GAAYASTPDFPQHHKTVFGT  | Negative |
| P45354 | LIILTTCSGAAYASTPDFPQ  | Negative |
| P45354 | AAAYASTPDFPQHHKTVFGTV | Negative |
| P45354 | LTTCSGAAYASTPDFPQHHK  | Negative |
| P45354 | SGAAYASTPDFPQHHKTVFG  | Negative |
| P45354 | VISLIILTTCSGAAYASTPD  | Negative |
| P45354 | AYASTPDFPQHHKTVFGTVT  | Negative |
| P45354 | DFPQHHKTVFGTVTIEKTTA  | Negative |
| P45354 | HKTVFGTVTIEKTTADKMTI  | Negative |
| P45354 | TTCSGAAYASTPDFPQHHKT  | Negative |
| P45354 | ILTTCSGAAYASTPDFPQHH  | Negative |
| P45354 | STPDFPQHHKTVFGTVTIEK  | Negative |
| P45354 | FPQHHKTVFGTVTIEKTTAD  | Negative |
| P45354 | MYKLNVISLIILTTCSGAAY  | Negative |
| P45354 | IILTTCSGAAYASTPDFPQH  | Negative |
| P45354 | TCSGAAYASTPDFPQHHKTV  | Negative |
| P45354 | NVISLIILTTCSGAAYASTP  | Negative |
| P45354 | TPDFPQHHKTVFGTVTIEKT  | Negative |
| P45354 | PDFPQHHKTVFGTVTIEKTT  | Negative |
| P45354 | PQHHKTVFGTVTIEKTTADK  | Negative |
| P45354 | LNVISLIILTTCSGAAYAST  | Negative |
| P45354 | SLIILTTCSGAAYASTPDFP  | Negative |

|        |                      |          |
|--------|----------------------|----------|
| P45354 | KLNVISLIILTTCSGAAYAS | Negative |
| P45354 | CSGAAYASTPDFPQHHKTVF | Negative |
| P45354 | QHHKTVFGTVTIEKTTADKM | Negative |
| P45354 | YKLNVISLIILTTCSGAAYA | Negative |
| P45452 | GVLAAFLFLSWTHCRALPLP | Negative |
| P45452 | GDEDDLSEEDLQFAERYLRS | Negative |
| P45452 | PGVLAFLFLSWTHCRALPL  | Negative |
| P45452 | WTHCRALPLPSGGDEDDLSE | Negative |
| P45452 | SGGDEDDLSEEDLQFAERYL | Negative |
| P45452 | PLPSGGDEDDLSEEDLQFAE | Negative |
| P45452 | SWTHCRALPLPSGGDEDDL  | Negative |
| P45452 | PSGGDEDDLSEEDLQFAERY | Negative |
| P45452 | DLSEEDLQFAERYLRSYYHP | Negative |
| P45452 | AFLFLSWTHCRALPLPSGGD | Negative |
| P45452 | HCRALPLPSGGDEDDLSEED | Negative |
| P45452 | HPGVLAFLFLSWTHCRALP  | Negative |
| P45452 | ALPLPSGGDEDDLSEEDLQF | Negative |
| P45452 | LSWTHCRALPLPSGGDEDDL | Negative |
| P45452 | DEDDLSEEDLQFAERYLRSY | Negative |
| P45452 | DDLSEEDLQFAERYLRSYYH | Negative |
| P45452 | RALPLPSGGDEDDLSEEDLQ | Negative |
| P45452 | LFLSWTHCRALPLPSGGDED | Negative |
| P45452 | FLSWTHCRALPLPSGGDEDD | Negative |
| P45452 | EDDLSEEDLQFAERYLRSYY | Negative |
| P45452 | THCRALPLPSGGDEDDLSEE | Negative |
| P45452 | GGDEDDLSEEDLQFAERYLR | Negative |
| P45452 | MHPGVLAFLFLSWTHCRAL  | Negative |
| P45452 | CRALPLPSGGDEDDLSEEDL | Negative |
| P45452 | LPLPSGGDEDDLSEEDLQFA | Negative |
| P45452 | LAAFLFLSWTHCRALPLPSG | Negative |
| P45452 | AAFLFLSWTHCRALPLPSGG | Negative |
| P45452 | FLFLSWTHCRALPLPSGGDE | Negative |
| P45452 | LPSGGDEDDLSEEDLQFAER | Negative |
| P45523 | AAEAAKPATAADSKAAFKND | Negative |
| P45523 | AAKPATAADSKAAFKNDDQK | Negative |
| P45523 | PITFAAEAAKPATAADSKAA | Negative |
| P45523 | TMAVALHAPITFAAEAAKPA | Negative |
| P45523 | AKPATAADSKAAFKNDDQKS | Negative |
| P45523 | HAPITFAAEAAKPATAADSK | Negative |
| P45523 | FKVTLLATTMAVALHAPITF | Negative |
| P45523 | VTLLATTMAVALHAPITFAA | Negative |
| P45523 | ITFAAEAAKPATAADSKAAF | Negative |
| P45523 | LFKVTLLATTMAVALHAPIT | Negative |
| P45523 | LLATTMAVALHAPITFAAEA | Negative |
| P45523 | KSLFKVTLLATTMAVALHAP | Negative |
| P45523 | MKSLFKVTLLATTMAVALHA | Negative |

|        |                      |          |
|--------|----------------------|----------|
| P45523 | TLLATTMAVALHAPITFAAE | Negative |
| P45523 | AEAAKPATAADSKAAFKNDD | Negative |
| P45523 | VALHAPITFAAEAAKPATAA | Negative |
| P45523 | ALHAPITFAAEAAKPATAAD | Negative |
| P45523 | KPATAADSKAAFKNDDQKSA | Negative |
| P45523 | APITFAAEAAKPATAADSKA | Negative |
| P45523 | LHAPITFAAEAAKPATAADS | Negative |
| P45523 | TFAAEAAKPATAADSKAAFK | Negative |
| P45523 | MAVALHAPITFAAEAAKPAT | Negative |
| P45523 | LATTMAVALHAPITFAAEAA | Negative |
| P45523 | EAACPATAADSKAAFKNDDQ | Negative |
| P45523 | KVTLLATTMAVALHAPITFA | Negative |
| P45523 | TTMAVALHAPITFAAEAAKP | Negative |
| P45523 | SLFKVTLLATTMAVALHAPI | Negative |
| P45523 | AVALHAPITFAAEAAKPATA | Negative |
| P45523 | FAAEAAKPATAADSKAAFKN | Negative |
| P45590 | KFVACFVFVAVASASDFS   | Negative |
| P45590 | CFVVFVAVASASDFSFSYGV | Negative |
| P45590 | YGVADPSTGDFKSQIESRLG | Negative |
| P45590 | VACFVFVAVASASDFSFSY  | Negative |
| P45590 | SDFSFSYGVADPSTGDFKS  | Negative |
| P45590 | PSTGDFKSQIESRLGDNVQG | Negative |
| P45590 | ASASDFSFSYGVADPSTGD  | Negative |
| P45590 | DPSTGDFKSQIESRLGDNVQ | Negative |
| P45590 | VADPSTGDFKSQIESRLGDN | Negative |
| P45590 | FVFVAVASASDFSFSYGVA  | Negative |
| P45590 | VFVAVASASDFSFSYGVAD  | Negative |
| P45590 | FVAVASASDFSFSYGVADP  | Negative |
| P45590 | FSSFSYGVADPSTGDFKSQI | Negative |
| P45590 | SFSYGVADPSTGDFKSQIES | Negative |
| P45590 | LVKFVACFVFVAVASASDFS | Negative |
| P45590 | ASDFSFSYGVADPSTGDFK  | Negative |
| P45590 | GVADPSTGDFKSQIESRLGD | Negative |
| P45590 | SSFSYGVADPSTGDFKSQIE | Negative |
| P45590 | FSYGVADPSTGDFKSQIESR | Negative |
| P45590 | VAVASASDFSFSYGVADPS  | Negative |
| P45590 | DFSFSYGVADPSTGDFKSQ  | Negative |
| P45590 | ACFVFVAVASASDFSFSYG  | Negative |
| P45590 | VASASDFSFSYGVADPSTG  | Negative |
| P45590 | AVASASDFSFSYGVADPST  | Negative |
| P45590 | ADPSTGDFKSQIESRLGDNV | Negative |
| P45590 | SYGVADPSTGDFKSQIESRL | Negative |
| P45590 | FVACFVFVAVASASDFSFS  | Negative |
| P45590 | SASDFSFSYGVADPSTGDF  | Negative |
| P45590 | MLVKFVACFVFVAVASASDF | Negative |
| P45628 | ESCTASNQCWSICKRLHNTN | Negative |



|        |                       |          |
|--------|-----------------------|----------|
| P45628 | ILSVLLLLALIICSIIDWSEG | Negative |
| P45628 | SIIDWSEGQFTQESCTASNQ  | Negative |
| P45628 | IICSIIDWSEGQFTQESCTA  | Negative |
| P45628 | SVLLLLALIICSIIDWSEGQF | Negative |
| P45628 | LALIICSIIDWSEGQFTQES  | Negative |
| P45628 | SCTASNQCWSICKRLHNTNR  | Negative |
| P45628 | DWSEGQFTQESCTASNQCWS  | Negative |
| P45628 | GQFTQESCTASNQCWSICKR  | Negative |
| P45628 | LLLALIICSIIDWSEGQFTQ  | Negative |
| P45628 | FTQESCTASNQCWSICKRLH  | Negative |
| P45628 | CSIIDWSEGQFTQESCTASN  | Negative |
| P45628 | IIDWSEGQFTQESCTASNQC  | Negative |
| P45628 | QFTQESCTASNQCWSICKRL  | Negative |
| P45628 | IDWSEGQFTQESCTASNQCW  | Negative |
| P45628 | ALIICSIIDWSEGQFTQESC  | Negative |
| P45628 | EGQFTQESCTASNQCWSICK  | Negative |
| P45628 | KILSVLLLLALIICSIIDWSE | Negative |
| P45628 | WSEGQFTQESCTASNQCWSI  | Negative |
| P45628 | MKILSVLLLLALIICSIIDWS | Negative |
| P45628 | ICSIIDWSEGQFTQESCTAS  | Negative |
| P45628 | TASNQCWSICKRLHNTNRGK  | Negative |
| P45628 | SEGQFTQESCTASNQCWSIC  | Negative |
| P45628 | VLLLLALIICSIIDWSEGQFT | Negative |
| P45628 | QESCTASNQCWSICKRLHNT  | Negative |
| P45628 | TQESCTASNQCWSICKRLHN  | Negative |
| P45628 | LSVLLLLALIICSIIDWSEGQ | Negative |
| P45628 | LIICSIIDWSEGQFTQESCT  | Negative |
| P45628 | CTASNQCWSICKRLHNTNRG  | Negative |
| P45658 | VDSKNCVYHCYPPCDGLCKK  | Negative |
| P45658 | VESGRDGYIVDSKNCVYHCY  | Negative |
| P45658 | ESGRDGYIVDSKNCVYHCYP  | Negative |
| P45658 | NCVYHCYPPCDGLCKKNGAK  | Negative |
| P45658 | IVDSKNCVYHCYPPCDGLCK  | Negative |
| P45658 | SGRDGYIVDSKNCVYHCYPP  | Negative |
| P45658 | LVIGVESGRDGYIVDSKNCV  | Negative |
| P45658 | DSKNCVYHCYPPCDGLCKKN  | Negative |
| P45658 | LLLVIGVESGRDGYIVDSKN  | Negative |
| P45658 | KNCVYHCYPPCDGLCKKNGA  | Negative |
| P45658 | DGYIVDSKNCVYHCYPPCDG  | Negative |
| P45658 | LALLLVIGVESGRDGYIVDS  | Negative |
| P45658 | ALLLVIGVESGRDGYIVDSK  | Negative |
| P45658 | GVESGRDGYIVDSKNCVYHC  | Negative |
| P45658 | YLIMFSLALLLVIGVESGRD  | Negative |
| P45658 | RDGYIVDSKNCVYHCYPPCD  | Negative |
| P45658 | SLALLLVIGVESGRDGYIVD  | Negative |
| P45658 | MFSLALLLVIGVESGRDGYI  | Negative |

|        |                      |          |
|--------|----------------------|----------|
| P45658 | VIGVESGRDGYIVDSKNCVY | Negative |
| P45658 | GRDGYIVDSKNCVYHCYPPC | Negative |
| P45658 | GYIVDSKNCVYHCYPPCDGL | Negative |
| P45658 | IGVESGRDGYIVDSKNCVYH | Negative |
| P45658 | MNYLIMFSLALLLVIGVESG | Negative |
| P45658 | YIVDSKNCVYHCYPPCDGLC | Negative |
| P45658 | NYLIMFSLALLLVIGVESGR | Negative |
| P45658 | FSLALLLVIGVESGRDGYIV | Negative |
| P45658 | LLVIGVESGRDGYIVDSKNC | Negative |
| P45658 | LIMFSLALLLVIGVESGRDG | Negative |
| P45658 | SKNCVYHCYPPCDGLCKKNG | Negative |
| P45662 | TGCKYECFKLGDNDYCLREC | Negative |
| P45662 | SLLMITACLALVGTWAKEG  | Negative |
| P45662 | ITACLALVGTWAKEGYLVN  | Negative |
| P45662 | ACLALVGTWAKEGYLVNSY  | Negative |
| P45662 | SYTGCKYECFKLGDNDYCLR | Negative |
| P45662 | MNSLLMITACLALVGTWAK  | Negative |
| P45662 | AKEGYLVNSYTGCKYECFKL | Negative |
| P45662 | NSLLMITACLALVGTWAKE  | Negative |
| P45662 | VGTWAKEGYLVNSYTGCKY  | Negative |
| P45662 | LVNSYTGCKYECFKLGDNDY | Negative |
| P45662 | TACLALVGTWAKEGYLVNS  | Negative |
| P45662 | GYLVNSYTGCKYECFKLGDN | Negative |
| P45662 | KEGYLVNSYTGCKYECFKLG | Negative |
| P45662 | GCKYECFKLGDNDYCLRECK | Negative |
| P45662 | LLMITACLALVGTWAKEGY  | Negative |
| P45662 | NSYTGCKYECFKLGDNDYCL | Negative |
| P45662 | VNSYTGCKYECFKLGDNDYC | Negative |
| P45662 | VWAKEGYLVNSYTGCKYECF | Negative |
| P45662 | YTGCKYECFKLGDNDYCLRE | Negative |
| P45662 | GTVWAKEGYLVNSYTGCKYE | Negative |
| P45662 | ALVGTWAKEGYLVNSYTG   | Negative |
| P45662 | LVGTWAKEGYLVNSYTGCK  | Negative |
| P45662 | MITACLALVGTWAKEGYLV  | Negative |
| P45662 | CLALVGTWAKEGYLVNSYT  | Negative |
| P45662 | EGYLVNSYTGCKYECFKLGD | Negative |
| P45662 | YLVNSYTGCKYECFKLGDND | Negative |
| P45662 | LALVGTWAKEGYLVNSYTG  | Negative |
| P45662 | WAKEGYLVNSYTGCKYECFK | Negative |
| P45662 | TVWAKEGYLVNSYTGCKYEC | Negative |
| P45696 | IPVSCKHSGQCLKPCKDAGM | Negative |
| P45696 | AVRIPVSCKHSGQCLKPCKD | Negative |
| P45696 | VCSMIIGINAVRIPVSCKHS | Negative |
| P45696 | GINAVRIPVSCKHSGQCLKP | Negative |
| P45696 | SCKHSGQCLKPCKDAGMRFG | Negative |
| P45696 | FVCSMIIGINAVRIPVSKH  | Negative |

|        |                      |          |
|--------|----------------------|----------|
| P45696 | IILFVCSMIIGINAVRIPVS | Negative |
| P45696 | MKVFSAVLIILFVCSMIIGI | Negative |
| P45696 | SMIIGINAVRIPVSCKHSGQ | Negative |
| P45696 | ILFVCSMIIGINAVRIPVSC | Negative |
| P45696 | AVLIILFVCSMIIGINAVRI | Negative |
| P45696 | INAVRIPVSCKHSGQCLKPC | Negative |
| P45696 | PVSCKHSGQCLKPCKDAGMR | Negative |
| P45696 | IIGINAVRIPVSCKHSGQCL | Negative |
| P45696 | VSCKHSGQCLKPCKDAGMRF | Negative |
| P45696 | KVFSAVLIILFVCSMIIGIN | Negative |
| P45696 | SAVLIILFVCSMIIGINAVR | Negative |
| P45696 | CKHSGQCLKPCKDAGMRFGK | Negative |
| P45696 | MIIGINAVRIPVSCKHSGQC | Negative |
| P45696 | VFSAVLIILFVCSMIIGINA | Negative |
| P45696 | IGINAVRIPVSCKHSGQCLK | Negative |
| P45696 | RIPVSCKHSGQCLKPCKDAG | Negative |
| P45696 | LFVCSMIIGINAVRIPVSCK | Negative |
| P45696 | NAVRIPVSCKHSGQCLKPCK | Negative |
| P45696 | FSAVLIILFVCSMIIGINAV | Negative |
| P45696 | VLILFVCSMIIGINAVRIP  | Negative |
| P45696 | VRIPVSCKHSGQCLKPCKDA | Negative |
| P45696 | KHSGQCLKPCKDAGMRFGKC | Negative |
| P45696 | CSMIIGINAVRIPVSCKHSG | Negative |
| P45697 | LLLMTGVESVRDAYIAKPHN | Negative |
| P45697 | MISFALLLMTGVESVRDAYI | Negative |
| P45697 | NYLVMISFALLLMTGVESVR | Negative |
| P45697 | PHNCVYECARNEYCNDLCTK | Negative |
| P45697 | GVESVRDAYIAKPHNCVYEC | Negative |
| P45697 | LLMTGVESVRDAYIAKPHNC | Negative |
| P45697 | SFALLLMTGVESVRDAYIAK | Negative |
| P45697 | LVMISFALLLMTGVESVRDA | Negative |
| P45697 | HNCVYECARNEYCNDLCTKN | Negative |
| P45697 | NCVYECARNEYCNDLCTKNG | Negative |
| P45697 | TGVESVRDAYIAKPHNCVYE | Negative |
| P45697 | VRDAYIAKPHNCVYECARNE | Negative |
| P45697 | ESVRDAYIAKPHNCVYECAR | Negative |
| P45697 | MNYLVMISFALLLMTGVESV | Negative |
| P45697 | SVRDAYIAKPHNCVYECARN | Negative |
| P45697 | IAKPHNCVYECARNEYCNDL | Negative |
| P45697 | RDAYIAKPHNCVYECARNEY | Negative |
| P45697 | VESVRDAYIAKPHNCVYECA | Negative |
| P45697 | DAYIAKPHNCVYECARNEYC | Negative |
| P45697 | YLVMSIFALLLMTGVESVRD | Negative |
| P45697 | YIAKPHNCVYECARNEYCND | Negative |
| P45697 | ALLLMTGVESVRDAYIAKPH | Negative |
| P45697 | KPHNCVYECARNEYCNDLCT | Negative |

|        |                       |          |
|--------|-----------------------|----------|
| P45697 | FALLMTGVESVRDAYIAKP   | Negative |
| P45697 | LMTGVESVRDAYIAKPHNCV  | Negative |
| P45697 | MTGVESVRDAYIAKPHNCVY  | Negative |
| P45697 | AKPHNCVYECARNEYCNDLC  | Negative |
| P45697 | AYIAKPHNCVYECARNEYCN  | Negative |
| P45697 | ISFALLMTGVESVRDAYIA   | Negative |
| P45796 | LFLSFALLSVFPMLNVDA    | Negative |
| P45796 | CLVLFLSFALLSVFPMLNV   | Negative |
| P45796 | VDAANRPLAKIPGNSNPLMD  | Negative |
| P45796 | LSFALLSVFPMLNVDAANR   | Negative |
| P45796 | PMLNVDAANRPLAKIPGNSN  | Negative |
| P45796 | ANRPLAKIPGNSNPLMDHKL  | Negative |
| P45796 | LNVDAAANRPLAKIPGNSNPL | Negative |
| P45796 | MLNVDAANRPLAKIPGNSNP  | Negative |
| P45796 | LSVFPMLNVDAANRPLAKIP  | Negative |
| P45796 | NRPLAKIPGNSNPLMDHKL   | Negative |
| P45796 | PLAKIPGNSNPLMDHKL     | Negative |
| P45796 | LLSVFPMLNVDAANRPLAKI  | Negative |
| P45796 | SVFPMLNVDAANRPLAKIPG  | Negative |
| P45796 | IRKCLVLFLSFALLSVFPM   | Negative |
| P45796 | SFALLSVFPMLNVDAANRP   | Negative |
| P45796 | ALLSVFPMLNVDAANRPLA   | Negative |
| P45796 | FLSFALLSVFPMLNVDAAN   | Negative |
| P45796 | NVDAANRPLAKIPGNSNPLM  | Negative |
| P45796 | RKCLVLFLSFALLSVFPML   | Negative |
| P45796 | RPLAKIPGNSNPLMDHKLGA  | Negative |
| P45796 | KCLVLFLSFALLSVFPMLN   | Negative |
| P45796 | FPMLNVDAANRPLAKIPGNS  | Negative |
| P45796 | AANRPLAKIPGNSNPLMDHK  | Negative |
| P45796 | VLFLSFALLSVFPMLNVDA   | Negative |
| P45796 | LLSVFPMLNVDAANRPLAK   | Negative |
| P45796 | DAANRPLAKIPGNSNPLMDH  | Negative |
| P45796 | LVLFLSFALLSVFPMLNVD   | Negative |
| P45796 | MIRKCLVLFLSFALLSVFP   | Negative |
| P45796 | VFPMLNVDAANRPLAKIPGN  | Negative |
| P45881 | MRTLWIMAVLLVGVEGDLWQ  | Negative |
| P45881 | LKETGKLFPYYTTYGCYCG   | Negative |
| P45881 | LWQFGQMILKETGKLFPYY   | Negative |
| P45881 | WIMAVLLVGVEGDLWQFGQM  | Negative |
| P45881 | AVLLVGVEGDLWQFGQMILK  | Negative |
| P45881 | TGKLFPYYTTYGCYCGWGG   | Negative |
| P45881 | ETGKLFPYYTTYGCYCGWG   | Negative |
| P45881 | EGDLWQFGQMILKETGKL    | Negative |
| P45881 | VEGDLWQFGQMILKETGKL   | Negative |
| P45881 | MILKETGKLFPYYTTYGCY   | Negative |
| P45881 | QFGQMILKETGKLFPYYTT   | Negative |

|        |                      |          |
|--------|----------------------|----------|
| P45881 | GVEGDLWQFGQMILKETGKL | Negative |
| P45881 | LLVGVEGDLWQFGQMILKET | Negative |
| P45881 | MAVLLVGVEGDLWQFGQMIL | Negative |
| P45881 | ILKETGKLFPFYTTYGCYC  | Negative |
| P45881 | LWIMAVLLVGVEGDLWQFGQ | Negative |
| P45881 | QMILKETGKLFPFYTTYGC  | Negative |
| P45881 | KETGKLFPFYTTYGCYCGW  | Negative |
| P45881 | VLLVGVEGDLWQFGQMILKE | Negative |
| P45881 | TLWIMAVLLVGVEGDLWQFG | Negative |
| P45881 | GKLFPFYTTYGCYCGWGGQ  | Negative |
| P45881 | DLWQFGQMILKETGKLFPY  | Negative |
| P45881 | GDLWQFGQMILKETGKLFP  | Negative |
| P45881 | GQMILKETGKLFPFYTTYG  | Negative |
| P45881 | IMAVLLVGVEGDLWQFGQMI | Negative |
| P45881 | LVGVEGDLWQFGQMILKETG | Negative |
| P45881 | VGVEGDLWQFGQMILKETGK | Negative |
| P45881 | WQFGQMILKETGKLFPFYT  | Negative |
| P45881 | FGQMILKETGKLFPFYTTY  | Negative |
| P46162 | LLAVLFLVLSAGSGFTQRV  | Negative |
| P46162 | RNPQSCRWNMGVCIPFLCRV | Negative |
| P46162 | TQVRNPNQSCRWNMGVCIPF | Negative |
| P46162 | NPQSCRWNMGVCIPFLCRVG | Negative |
| P46162 | LLAVLFLVLSAGSGFTQVR  | Negative |
| P46162 | AGSGFTQVRNPNQSCRWNMG | Negative |
| P46162 | SCRWNMGVCIPFLCRVGMQR | Negative |
| P46162 | VRNPQSCRWNMGVCIPFLCR | Negative |
| P46162 | GSGFTQVRNPNQSCRWNMGV | Negative |
| P46162 | AVLFLVLSAGSGFTQVRNP  | Negative |
| P46162 | GFTQVRNPNQSCRWNMGVCI | Negative |
| P46162 | RLHHLLAVLFLVLSAGSGF  | Negative |
| P46162 | LFLVLSAGSGFTQVRNPNQS | Negative |
| P46162 | VLSAGSGFTQVRNPNQSCRW | Negative |
| P46162 | LHHLLAVLFLVLSAGSGFT  | Negative |
| P46162 | RVRNPQSCRWNMGVCIPFLC | Negative |
| P46162 | SGFTQVRNPNQSCRWNMGVC | Negative |
| P46162 | MRLHHLLAVLFLVLSAGSG  | Negative |
| P46162 | QSCRWNMGVCIPFLCRVGM  | Negative |
| P46162 | SAGSGFTQVRNPNQSCRWNM | Negative |
| P46162 | HHLLAVLFLVLSAGSGFTQ  | Negative |
| P46162 | PQSCRWNMGVCIPFLCRVGM | Negative |
| P46162 | VLFLVLSAGSGFTQVRNPNQ | Negative |
| P46162 | FLVLSAGSGFTQVRNPNQSC | Negative |
| P46162 | HLLAVLFLVLSAGSGFTQR  | Negative |
| P46162 | QVRNPNQSCRWNMGVCIPFL | Negative |
| P46162 | LVLSAGSGFTQVRNPNQSCR | Negative |
| P46162 | FTQVRNPNQSCRWNMGVCIP | Negative |

|        |                        |          |
|--------|------------------------|----------|
| P46162 | LSAGSGFTQVRNPQSCRWN    | Negative |
| P46163 | LHHLLLVLLFLVLSAGSGFT   | Negative |
| P46163 | VVRNPQSCRWNMGVCIPISC   | Negative |
| P46163 | MRLHLLLVLLFLVLSAGSG    | Negative |
| P46163 | SAGSGFTQVVRNPQSCRWNM   | Negative |
| P46163 | LFLVLSAGSGFTQVVRNPQS   | Negative |
| P46163 | VRNPQSCRWNMGVCIPISCP   | Negative |
| P46163 | GSGFTQVVRNPQSCRWNMGV   | Negative |
| P46163 | HLLLVLLFLVLSAGSGFTQ    | Negative |
| P46163 | TQVVRNPQSCRWNMGVCIP    | Negative |
| P46163 | RLHLLLVLLFLVLSAGSGF    | Negative |
| P46163 | SGFTQVVRNPQSCRWNMGVC   | Negative |
| P46163 | VLLFLVLSAGSGFTQVVRNP   | Negative |
| P46163 | LLVLLFLVLSAGSGFTQVVR   | Negative |
| P46163 | LSAGSGFTQVVRNPQSCRWN   | Negative |
| P46163 | HLLLVLLFLVLSAGSGFTQV   | Negative |
| P46163 | VLSAGSGFTQVVRNPQSCRW   | Negative |
| P46163 | FLVLSAGSGFTQVVRNPQSC   | Negative |
| P46163 | QVVRNPQSCRWNMGVCIPIS   | Negative |
| P46163 | LLFLVLSAGSGFTQVVRNPQ   | Negative |
| P46163 | AGSGFTQVVRNPQSCRWNMG   | Negative |
| P46163 | FTQVVRNPQSCRWNMGVCIP   | Negative |
| P46163 | QSCRWNMGVCIPISCPGNMR   | Negative |
| P46163 | NPQSCRWNMGVCIPISCPGN   | Negative |
| P46163 | SCRWNMGVCIPISCPGNMRQ   | Negative |
| P46163 | RNPQSCRWNMGVCIPISCPG   | Negative |
| P46163 | PQSCRWNMGVCIPISCPGNM   | Negative |
| P46163 | LVLVLSAGSGFTQVVRNPQSCR | Negative |
| P46163 | GFTQVVRNPQSCRWNMGVCI   | Negative |
| P46163 | LLLVLVLSAGSGFTQVV      | Negative |
| P46165 | VLSAGSGFTQGVRNFVTCRI   | Negative |
| P46165 | RNFVTCRINRGFCVPIRCPG   | Negative |
| P46165 | RLHLLLVLLFLVLSAGSGF    | Negative |
| P46165 | FLVLSAGSGFTQGVRNFVTC   | Negative |
| P46165 | GVRNFVTCRINRGFCVPIRC   | Negative |
| P46165 | SGFTQGVRNFVTCRINRGFC   | Negative |
| P46165 | FVTCRINRGFCVPIRCPGHR   | Negative |
| P46165 | LLFLVLSAGSGFTQGVRNFV   | Negative |
| P46165 | FTQGVRNFVTCRINRGFCVP   | Negative |
| P46165 | MRLHLLLVLLFLVLSAGSG    | Negative |
| P46165 | TCRINRGFCVPIRCPGHRQ    | Negative |
| P46165 | LVLVLSAGSGFTQGVRNFVTCR | Negative |
| P46165 | LHHLLLVLLFLVLSAGSGFT   | Negative |
| P46165 | NFVTCRINRGFCVPIRCPGH   | Negative |
| P46165 | GSGFTQGVRNFVTCRINRGF   | Negative |
| P46165 | LFLVLSAGSGFTQGVRNFVT   | Negative |

|        |                       |          |
|--------|-----------------------|----------|
| P46165 | ALLFLVLSAGSGFTQGVRNF  | Negative |
| P46165 | VTCTINRGFCVPIRCPGHRR  | Negative |
| P46165 | HHLLLALLFLVLSAGSGFTQ  | Negative |
| P46165 | LLLALLFLVLSAGSGFTQGV  | Negative |
| P46165 | VRNFVTCTINRGFCVPIRCP  | Negative |
| P46165 | SAGSGFTQGVVRNFVTCTINR | Negative |
| P46165 | HLLLALLFLVLSAGSGFTQG  | Negative |
| P46165 | GFTQGVVRNFVTCTINRGFCV | Negative |
| P46165 | TQGVVRNFVTCTINRGFCVPI | Negative |
| P46165 | LLALLFLVLSAGSGFTQGVR  | Negative |
| P46165 | LSAGSGFTQGVVRNFVTCTIN | Negative |
| P46165 | QGVVRNFVTCTINRGFCVPIR | Negative |
| P46165 | AGSGFTQGVVRNFVTCTINRG | Negative |
| P46168 | SGSGFTQGVRSYLSCWGNRG  | Negative |
| P46168 | SYLSCWGNRGICLLNRCPCR  | Negative |
| P46168 | QGVRSYLSCWGNRGICLLNR  | Negative |
| P46168 | LLVLSSSGSGFTQGVRSYL   | Negative |
| P46168 | LLLVLSSSGSGFTQGVRSY   | Negative |
| P46168 | YLSCWGNRGICLLNRCPRGM  | Negative |
| P46168 | LHHLLLLLLLVLSSSGSGFT  | Negative |
| P46168 | FTQGVRSYLSCWGNRGICLL  | Negative |
| P46168 | RLHHLLLLLLLVLSSSGSGF  | Negative |
| P46168 | LSSSGSGFTQGVRSYLSCWGN | Negative |
| P46168 | VRSYLSCWGNRGICLLNRCR  | Negative |
| P46168 | GVRSYLSCWGNRGICLLNRC  | Negative |
| P46168 | VVLSSSGSGFTQGVRSYLSCW | Negative |
| P46168 | HHLLLLLLLVLSSSGSGFTQ  | Negative |
| P46168 | RSYLSCWGNRGICLLNRCRPG | Negative |
| P46168 | HLLLLLLLVLSSSGSGFTQG  | Negative |
| P46168 | LLLLLLVLSSSGSGFTQGVR  | Negative |
| P46168 | LVVLSSSGSGFTQGVRSYLS  | Negative |
| P46168 | TQGVRSYLSCWGNRGICLLN  | Negative |
| P46168 | LLVLSSSGSGFTQGVRSYLS  | Negative |
| P46168 | VLSSSGSGFTQGVRSYLSCWG | Negative |
| P46168 | MRLHHLLLLLLLVLSSSGSG  | Negative |
| P46168 | SSSGSGFTQGVRSYLSCWGNR | Negative |
| P46168 | SCWGNRGICLLNRCPRMRQ   | Negative |
| P46168 | LSCWGNRGICLLNRCPRMR   | Negative |
| P46168 | SGFTQGVRSYLSCWGNRGIC  | Negative |
| P46168 | LLLLLLVLSSSGSGFTQGV   | Negative |
| P46168 | GSGFTQGVRSYLSCWGNRGI  | Negative |
| P46168 | GFTQGVRSYLSCWGNRGICL  | Negative |
| P46169 | VLSAGSGISGPLSCRRNGGV  | Negative |
| P46169 | LSCRRNGGVCIPIRCPGPMR  | Negative |
| P46169 | SAGSGISGPLSCRRNGGVCI  | Negative |
| P46169 | RNGGVCIPIRCPGPMRQIGT  | Negative |

|        |                      |          |
|--------|----------------------|----------|
| P46169 | CRRNGGVCIPIRCPGPMRQI | Negative |
| P46169 | MRLHLLALLFLVLSAGSG   | Negative |
| P46169 | SGPLSCRRNGGVCIPIRCPG | Negative |
| P46169 | GSGISGPLSCRRNGGVCIP  | Negative |
| P46169 | LHLLALLFLVLSAGSGIS   | Negative |
| P46169 | RLHLLALLFLVLSAGSGI   | Negative |
| P46169 | AGSGISGPLSCRRNGGVCIP | Negative |
| P46169 | RRNGGVCIPIRCPGPMRQIG | Negative |
| P46169 | SGISGPLSCRRNGGVCIP   | Negative |
| P46169 | HHLLALLFLVLSAGSGISG  | Negative |
| P46169 | GISGPLSCRRNGGVCIP    | Negative |
| P46169 | LVLSAGSGISGPLSCRRNGG | Negative |
| P46169 | HLLALLFLVLSAGSGISGP  | Negative |
| P46169 | NGGVCIPIRCPGPMRQIGTC | Negative |
| P46169 | ISGPLSCRRNGGVCIP     | Negative |
| P46169 | LLFLVLSAGSGISGPLSCRR | Negative |
| P46169 | SCRRNGGVCIPIRCPGPMRQ | Negative |
| P46169 | ALLFLVLSAGSGISGPLSCR | Negative |
| P46169 | LLLALLFLVLSAGSGISGPL | Negative |
| P46169 | GPLSCRRNGGVCIPIRCPGP | Negative |
| P46169 | PLSCRRNGGVCIPIRCPGPM | Negative |
| P46169 | LFLVLSAGSGISGPLSCRRN | Negative |
| P46169 | LSAGSGISGPLSCRRNGGVC | Negative |
| P46169 | FLVLSAGSGISGPLSCRRNG | Negative |
| P46169 | LLALLFLVLSAGSGISGPLS | Negative |
| P46445 | LFNQASRIFFGIALPCLIFL | Negative |
| P46445 | IFSLGNTALAADLAHGKAIF | Negative |
| P46445 | CLIFLGGIFSLGNTALAADL | Negative |
| P46445 | LIFLGGIFSLGNTALAADLA | Negative |
| P46445 | LGGIFSLGNTALAADLAHGK | Negative |
| P46445 | LPCLIFLGGIFSLGNTALAA | Negative |
| P46445 | KLFNQASRIFFGIALPCLIF | Negative |
| P46445 | NQASRIFFGIALPCLIFLGG | Negative |
| P46445 | GIALPCLIFLGGIFSLGNTA | Negative |
| P46445 | IFFGIALPCLIFLGGIFSLG | Negative |
| P46445 | GIFSLGNTALAADLAHGKAI | Negative |
| P46445 | FLGGIFSLGNTALAADLAHG | Negative |
| P46445 | FKLFNQASRIFFGIALPCLI | Negative |
| P46445 | ASRIFFGIALPCLIFLGGIF | Negative |
| P46445 | SLGNTALAADLAHGKAIFAG | Negative |
| P46445 | LGNTALAADLAHGKAIFAGN | Negative |
| P46445 | RIFFGIALPCLIFLGGIFSL | Negative |
| P46445 | FGIALPCLIFLGGIFSLGNT | Negative |
| P46445 | IALPCLIFLGGIFSLGNTAL | Negative |
| P46445 | QASRIFFGIALPCLIFLGGI | Negative |
| P46445 | FSLGNTALAADLAHGKAIFA | Negative |



|        |                       |          |
|--------|-----------------------|----------|
| P46445 | MFKLFNQASRIFFGIALPCL  | Negative |
| P46445 | SRIFFGIALPCLIFLGGIFS  | Negative |
| P46445 | FFGIALPCLIFLGGIFSLGN  | Negative |
| P46445 | GGIFSLGNTALAADLAHGKA  | Negative |
| P46445 | FNQASRIFFGIALPCLIFLG  | Negative |
| P46445 | PCLIFLGGIFSLGNTALAAD  | Negative |
| P46445 | ALPCLIFLGGIFSLGNTALA  | Negative |
| P46445 | GNTALAADLAHGKAIFAGNC  | Negative |
| P46739 | YNENGRRCQRHGRRLAIADA  | Negative |
| P46739 | KAKKYENQIYNENGRRCQRH  | Negative |
| P46739 | ANGLNTVNAGDGKNLGTATA  | Negative |
| P46739 | RRCQRHGRRLAIADANGLNT  | Negative |
| P46739 | YENQIYNENGRRCQRHGRRL  | Negative |
| P46739 | NENGRRCQRHGRRLAIADAN  | Negative |
| P46739 | GRRRLAIADANGLNTVNAGDG | Negative |
| P46739 | CQRHGRRLAIADANGLNTVN  | Negative |
| P46739 | GRRRCQRHGRRLAIADANGLN | Negative |
| P46739 | KYENQIYNENGRRCQRHGRR  | Negative |
| P46739 | RHGRRLAIADANGLNTVNAG  | Negative |
| P46739 | QRHGRRLAIADANGLNTVNA  | Negative |
| P46739 | HGRRLAIADANGLNTVNAGD  | Negative |
| P46739 | IADANGLNTVNAGDGKNLGT  | Negative |
| P46739 | ENQIYNENGRRCQRHGRRLA  | Negative |
| P46739 | RRLAIADANGLNTVNAGDGK  | Negative |
| P46739 | MKAKKYENQIYNENGRRCQR  | Negative |
| P46739 | AIADANGLNTVNAGDGKNLG  | Negative |
| P46739 | DANGLNTVNAGDGKNLGTAT  | Negative |
| P46739 | RCQRHGRRLAIADANGLNTV  | Negative |
| P46739 | RLAIADANGLNTVNAGDGKN  | Negative |
| P46739 | ENGRRCQRHGRRLAIADANG  | Negative |
| P46739 | NQIYNENGRRCQRHGRRLAI  | Negative |
| P46739 | KKYENQIYNENGRRCQRHGR  | Negative |
| P46739 | AKKYENQIYNENGRRCQRHG  | Negative |
| P46739 | ADANGLNTVNAGDGKNLGTA  | Negative |
| P46739 | LAIADANGLNTVNAGDGKNL  | Negative |
| P46739 | IYNENGRRCQRHGRRLAIAD  | Negative |
| P46739 | QIYNENGRRCQRHGRRLAIA  | Negative |
| P46883 | VALSFAWQAPVFAHGGEAHM  | Negative |
| P46883 | GSPSLYSARKTTLALAVALS  | Negative |
| P46883 | ALSFAWQAPVFAHGGEAHMV  | Negative |
| P46883 | LSFAWQAPVFAHGGEAHMVP  | Negative |
| P46883 | AVALSFAWQAPVFAHGGEAH  | Negative |
| P46883 | RKTTTLALAVALSFAWQAPVF | Negative |
| P46883 | APVFAHGGEAHMVPMDKTLK  | Negative |
| P46883 | PVFAHGGEAHMVPMDKTLKE  | Negative |
| P46883 | VFAHGGEAHMVPMDKTLKEF  | Negative |

|        |                      |          |
|--------|----------------------|----------|
| P46883 | MGSPSLYSARKTTLALAVAL | Negative |
| P46883 | AWQAPVFAHGGEAHMVPMDK | Negative |
| P46883 | LYSARKTTLALAVALSFAWQ | Negative |
| P46883 | ALAVALSFAWQAPVFAHGGE | Negative |
| P46883 | FAWQAPVFAHGGEAHMVPMD | Negative |
| P46883 | YSARKTTLALAVALSFAWQA | Negative |
| P46883 | AHGGEAHMVPMDKTLKEFGA | Negative |
| P46883 | SPSLYSARKTTLALAVALSF | Negative |
| P46883 | SLYSARKTTLALAVALSFAW | Negative |
| P46883 | FAHGGEAHMVPMDKTLKEFG | Negative |
| P46883 | PSLYSARKTTLALAVALSFA | Negative |
| P46883 | TLALAVALSFAWQAPVFAHG | Negative |
| P46883 | QAPVFAHGGEAHMVPMDKTL | Negative |
| P46883 | WQAPVFAHGGEAHMVPMDKT | Negative |
| P46883 | SFAWQAPVFAHGGEAHMVPM | Negative |
| P46883 | SARKTTLALAVALSFAWQAP | Negative |
| P46883 | ARKTTLALAVALSFAWQAPV | Negative |
| P46883 | LALAVALSFAWQAPVFAHGG | Negative |
| P46883 | TTLALAVALSFAWQAPVFAH | Negative |
| P46883 | KTTLALAVALSFAWQAPVFA | Negative |
| P47001 | GEPWSTLTPTGSISCGAAEY | Negative |
| P47001 | VALAASVAALSATASAEGYT | Negative |
| P47001 | MQFKNVALAASVAALSATAS | Negative |
| P47001 | AALSATASAEGYTPGEPWST | Negative |
| P47001 | NVALAASVAALSATASAEGY | Negative |
| P47001 | VAALSATASAEGYTPGEPWS | Negative |
| P47001 | ASVAALSATASAEGYTPGEP | Negative |
| P47001 | KNVALAASVAALSATASAEG | Negative |
| P47001 | LSATASAEGYTPGEPWSTLT | Negative |
| P47001 | LAASVAALSATASAEGYTPG | Negative |
| P47001 | TASAEGYTPGEPWSTLTPTG | Negative |
| P47001 | FKNVALAASVAALSATASAE | Negative |
| P47001 | WSTLTPTGSISCGAAEYTTT | Negative |
| P47001 | ALSATASAEGYTPGEPWSTL | Negative |
| P47001 | PGEPWSTLTPTGSISCGAAE | Negative |
| P47001 | GYTPGEPWSTLTPTGSISCG | Negative |
| P47001 | ATASAEGYTPGEPWSTLTPT | Negative |
| P47001 | AEGYTPGEPWSTLTPTGSIS | Negative |
| P47001 | YTPGEPWSTLTPTGSISCGA | Negative |
| P47001 | SAEGYTPGEPWSTLTPTGSI | Negative |
| P47001 | TPGEPWSTLTPTGSISCGAA | Negative |
| P47001 | EGYTPGEPWSTLTPTGSISC | Negative |
| P47001 | EPWSTLTPTGSISCGAAEYT | Negative |
| P47001 | ASAEGYTPGEPWSTLTPTGS | Negative |
| P47001 | PWSTLTPTGSISCGAAEYTT | Negative |
| P47001 | SVAALSATASAEGYTPGEPW | Negative |

|        |                       |          |
|--------|-----------------------|----------|
| P47001 | AASVAALSATASAEGYTPGE  | Negative |
| P47001 | QFKNVALAASVAALSATASA  | Negative |
| P47001 | SATASAEGYTPGEPWSTLTP  | Negative |
| P47178 | VASATAASVTTTTLSPYDERV | Negative |
| P47178 | ALVASATAASVTTTTLSPYDE | Negative |
| P47178 | LSPYDERVNLIELAVYVSDI  | Negative |
| P47178 | AAALVASATAASVTTTTLSPY | Negative |
| P47178 | LAVAAALVASATAASVTTTL  | Negative |
| P47178 | TTLSPYDERVNLIELAVYVS  | Negative |
| P47178 | YDERVNLIELAVYVSDIGAH  | Negative |
| P47178 | ILAVAAALVASATAASVTTT  | Negative |
| P47178 | AALVASATAASVTTTTLSPYD | Negative |
| P47178 | SRISILAVAAALVASATAAS  | Negative |
| P47178 | SPYDERVNLIELAVYVSDIG  | Negative |
| P47178 | PYDERVNLIELAVYVSDIGA  | Negative |
| P47178 | LVASATAASVTTTTLSPYDER | Negative |
| P47178 | MSRISILAVAAALVASATAA  | Negative |
| P47178 | RISILAVAAALVASATAASV  | Negative |
| P47178 | VAAALVASATAASVTTTTLSP | Negative |
| P47178 | AVAAALVASATAASVTTTLS  | Negative |
| P47178 | TTTTLSPYDERVNLIELAVYV | Negative |
| P47178 | SATAASVTTTTLSPYDERVNL | Negative |
| P47178 | ASVTTTTLSPYDERVNLIELA | Negative |
| P47178 | ASATAASVTTTTLSPYDERVN | Negative |
| P47178 | AASVTTTTLSPYDERVNLIEL | Negative |
| P47178 | ISILAVAAALVASATAASVT  | Negative |
| P47178 | VTTTTLSPYDERVNLIELAVY | Negative |
| P47178 | ATAASVTTTTLSPYDERVNLI | Negative |
| P47178 | SVTTTTLSPYDERVNLIELAV | Negative |
| P47178 | TAASVTTTTLSPYDERVNLI  | Negative |
| P47178 | TLSPYDERVNLIELAVYVSD  | Negative |
| P47178 | DERVNLIELAVYVSDIGAHL  | Negative |
| P47796 | GCGRPAISPVITGYSRIVNG  | Negative |
| P47796 | GYSRIVNGEEAVPHSWSWQV  | Negative |
| P47796 | CGRPAISPVITGYSRIVNGE  | Negative |
| P47796 | ISPVITGYSRIVNGEEAVPH  | Negative |
| P47796 | RPAISPVITGYSRIVNGEEA  | Negative |
| P47796 | FRRTYGCGRPAISPVITGYS  | Negative |
| P47796 | TGYSRIVNGEEAVPHSWSWQ  | Negative |
| P47796 | VDSVLPGLFRRTYGCGRPAI  | Negative |
| P47796 | GLFRRTYGCGRPAISPVITG  | Negative |
| P47796 | DSVLPGLFRRTYGCGRPAIS  | Negative |
| P47796 | TYGCGRPAISPVITGYSRIV  | Negative |
| P47796 | MGHEVDSVLPGLFRRTYGCG  | Negative |
| P47796 | RRTYGCGRPAISPVITGYSR  | Negative |
| P47796 | PVITGYSRIVNGEEAVPHSW  | Negative |

|        |                      |          |
|--------|----------------------|----------|
| P47796 | GRPAISPVITGYSRIVNGEE | Negative |
| P47796 | YGCGRPAISPVITGYSRIVN | Negative |
| P47796 | AISPVITGYSRIVNGEEAVP | Negative |
| P47796 | ITGYSRIVNGEEAVPHSWSW | Negative |
| P47796 | LFRRTYGCGRPAISPVITGY | Negative |
| P47796 | PGLFRRTYGCGRPAISPVIT | Negative |
| P47796 | VITGYSRIVNGEEAVPHSW  | Negative |
| P47796 | LPGLFRRTYGCGRPAISPVI | Negative |
| P47796 | GHEVDSVLPGLFRRTYGCGR | Negative |
| P47796 | SPVITGYSRIVNGEEAVPHS | Negative |
| P47796 | RTYGCGRPAISPVITGYSRI | Negative |
| P47796 | SVLPGLFRRTYGCGRPAISP | Negative |
| P47796 | PAISPVITGYSRIVNGEEAV | Negative |
| P47796 | HEVDSVLPGLFRRTYGCGRP | Negative |
| P47796 | VLPGLFRRTYGCGRPAISPV | Negative |
| P47853 | FEQKGFWDFTLDDGLLMMND | Negative |
| P47853 | PFEQKGFWDFTLDDGLLMMN | Negative |
| P47853 | LPFEQKGFWDFTLDDGLLMM | Negative |
| P47853 | MRPLWLLTLLLALSQALPFE | Negative |
| P47853 | QKGFWDFTLDDGLLMMNDEE | Negative |
| P47853 | TLLLALSQALPFEQKGFWDF | Negative |
| P47853 | LLLALSQALPFEQKGFWDFT | Negative |
| P47853 | SQALPFEQKGFWDFTLDDGL | Negative |
| P47853 | EQKGFWDFTLDDGLLMMNDE | Negative |
| P47853 | FTLDDGLLMMNDEEASGSDT | Negative |
| P47853 | ALSQALPFEQKGFWDFTLDD | Negative |
| P47853 | WLLTLLLALSQALPFEQKGF | Negative |
| P47853 | LSQALPFEQKGFWDFTLDDG | Negative |
| P47853 | LALSQALPFEQKGFWDFTLD | Negative |
| P47853 | DDGLLMMNDEEASGSDTTSG | Negative |
| P47853 | WDFTLDDGLLMMNDEEASGS | Negative |
| P47853 | ALPFEQKGFWDFTLDDGLLM | Negative |
| P47853 | LTLLLALSQALPFEQKGFWD | Negative |
| P47853 | GFWDFTLDDGLLMMNDEEAS | Negative |
| P47853 | LLALSQALPFEQKGFWDFTL | Negative |
| P47853 | DFTLDDGLLMMNDEEASGSD | Negative |
| P47853 | QALPFEQKGFWDFTLDDGLL | Negative |
| P47853 | LLTLLLALSQALPFEQKGF  | Negative |
| P47853 | PLWLLTLLLALSQALPFEQK | Negative |
| P47853 | FWDFTLDDGLLMMNDEEASG | Negative |
| P47853 | LDDGLLMMNDEEASGSDTTS | Negative |
| P47853 | TLDDGLLMMNDEEASGSDTT | Negative |
| P47853 | LWLLTLLLALSQALPFEQKG | Negative |
| P47853 | KGFWDFTLDDGLLMMNDEEA | Negative |
| P48096 | SQGTKLHLAVLCLVVSCHAI | Negative |
| P48096 | GTKLHLAVLCLVVSCHAIGL | Negative |

|        |                       |          |
|--------|-----------------------|----------|
| P48096 | CLVVSCHAIGLSDLMERASQ  | Negative |
| P48096 | MERASQRSDKLHSLSTSLTK  | Negative |
| P48096 | AIGLSDLMERASQRSDKLHS  | Negative |
| P48096 | LMERASQRSDKLHSLSTSLT  | Negative |
| P48096 | LSDLMERASQRSDKLHSLST  | Negative |
| P48096 | LAVLCLVVSCHAIGLSDLME  | Negative |
| P48096 | RRSQGTKLHLAVLCLVVSCH  | Negative |
| P48096 | LCLVVSCHAIGLSDLMERAS  | Negative |
| P48096 | VLCLVVSCHAIGLSDLMERA  | Negative |
| P48096 | HLAVLCLVVSCHAIGLSDLM  | Negative |
| P48096 | ARRSQGTKLHLAVLCLVVSCH | Negative |
| P48096 | GLSDLMERASQRSDKLHSL   | Negative |
| P48096 | SDLMERASQRSDKLHSLSTS  | Negative |
| P48096 | CHAIGLSDLMERASQRSDKL  | Negative |
| P48096 | HAIGLSDLMERASQRSDKLH  | Negative |
| P48096 | RSQGTKLHLAVLCLVVSCHA  | Negative |
| P48096 | MARRSQGTKLHLAVLCLVVS  | Negative |
| P48096 | SCHAIGLSDLMERASQRSDK  | Negative |
| P48096 | DLMERASQRSDKLHSLSTSL  | Negative |
| P48096 | VVSCHAIGLSDLMERASQRS  | Negative |
| P48096 | LVVSCHAIGLSDLMERASQR  | Negative |
| P48096 | IGLSDLMERASQRSDKLHSL  | Negative |
| P48096 | VSCHAIGLSDLMERASQRSD  | Negative |
| P48096 | LHLAVLCLVVSCHAIGLSDL  | Negative |
| P48096 | TKLHLAVLCLVVSCHAIGLS  | Negative |
| P48096 | QGTKLHLAVLCLVVSCHAIG  | Negative |
| P48096 | AVLCLVVSCHAIGLSDLMER  | Negative |
| P48307 | PARPLGLSILLFLTEAALG   | Negative |
| P48307 | MDPARPLGLSILLFLTEAA   | Negative |
| P48307 | ILLFLTEAALGDAAQEPTG   | Negative |
| P48307 | PLGLSILLFLTEAALGDAA   | Negative |
| P48307 | GDAAQEPTGNNAEICLLPLD  | Negative |
| P48307 | RPLGLSILLFLTEAALGDA   | Negative |
| P48307 | DAAQEPTGNNAEICLLPLDY  | Negative |
| P48307 | TEAALGDAAQEPTGNNAEIC  | Negative |
| P48307 | TGNNAEICLLPLDYGPCRAL  | Negative |
| P48307 | DPARPLGLSILLFLTEAAL   | Negative |
| P48307 | LFLTEAALGDAAQEPTGNNA  | Negative |
| P48307 | LGDAAEPTGNNAEICLLPL   | Negative |
| P48307 | EAALGDAAQEPTGNNAEICL  | Negative |
| P48307 | PTGNNAEICLLPLDYGPCRA  | Negative |
| P48307 | LTEAALGDAAQEPTGNNAEI  | Negative |
| P48307 | AQEPTGNNAEICLLPLDYGP  | Negative |
| P48307 | LGLSILLFLTEAALGDAAQ   | Negative |
| P48307 | GNNAEICLLPLDYGPCRALL  | Negative |
| P48307 | SILLFLTEAALGDAAQEPT   | Negative |

|        |                      |          |
|--------|----------------------|----------|
| P48307 | FLTEAALGDAAQEPTGNNAE | Negative |
| P48307 | LLFLTEAALGDAAQEPTGNN | Negative |
| P48307 | QEPTGNNAEICLLPLDYGPC | Negative |
| P48307 | ARPLGLSILLFLTEAALGD  | Negative |
| P48307 | LLLFLTEAALGDAAQEPTGN | Negative |
| P48307 | AAQEPTGNNAEICLLPLDYG | Negative |
| P48307 | ALGDAAQEPTGNNAEICLLP | Negative |
| P48307 | LSILLFLTEAALGDAAQEP  | Negative |
| P48307 | AALGDAAQEPTGNNAEICLL | Negative |
| P48307 | EPTGNNAEICLLPLDYGPCR | Negative |
| P48740 | KASAHTVELNNMFGQIQSPG | Negative |
| P48740 | ASAHTVELNNMFGQIQSPGY | Negative |
| P48740 | ELNNMFGQIQSPGYPDSYPS | Negative |
| P48740 | SAHTVELNNMFGQIQSPGYP | Negative |
| P48740 | LYYALCFSLSKASAHTVELN | Negative |
| P48740 | LLYYALCFSLSKASAHTVE  | Negative |
| P48740 | SLSKASAHTVELNNMFGQIQ | Negative |
| P48740 | SKASAHTVELNNMFGQIQSP | Negative |
| P48740 | CFSLSKASAHTVELNNMFGQ | Negative |
| P48740 | FGQIQSPGYPDSYPSDSEVT | Negative |
| P48740 | YALCFSLSKASAHTVELNNM | Negative |
| P48740 | MFGQIQSPGYPDSYPSDSEV | Negative |
| P48740 | LCFSLSKASAHTVELNNMFG | Negative |
| P48740 | FSLSKASAHTVELNNMFGQI | Negative |
| P48740 | TVELNNMFGQIQSPGYPDSY | Negative |
| P48740 | VELNNMFGQIQSPGYPDSYP | Negative |
| P48740 | ALCFSLSKASAHTVELNNMF | Negative |
| P48740 | QIQSPGYPDSYPSDSEVTWN | Negative |
| P48740 | NMFGQIQSPGYPDSYPSDSE | Negative |
| P48740 | HTVELNNMFGQIQSPGYPDS | Negative |
| P48740 | AHTVELNNMFGQIQSPGYPD | Negative |
| P48740 | LSKASAHTVELNNMFGQIQS | Negative |
| P48740 | MRWLLYYALCFSLSKASAH  | Negative |
| P48740 | WLLLYYALCFSLSKASAHTV | Negative |
| P48740 | NNMFGQIQSPGYPDSYPSDS | Negative |
| P48740 | LNNMFGQIQSPGYPDSYPSD | Negative |
| P48740 | YYALCFSLSKASAHTVELNN | Negative |
| P48740 | GQIQSPGYPDSYPSDSEVTW | Negative |
| P48740 | RWLLLYYALCFSLSKASAHT | Negative |
| P48745 | QSVQSTSFCLRKQCLCLTFL | Negative |
| P48745 | FLLHLLGQVAATQRCPPQC  | Negative |
| P48745 | TFLLLHLLGQVAATQRCPPQ | Negative |
| P48745 | TSFCLRKQCLCLTFLLLHLL | Negative |
| P48745 | HLLGQVAATQRCPPQCPGRC | Negative |
| P48745 | QCLCLTFLLLHLLGQVAATQ | Negative |
| P48745 | LLHLLGQVAATQRCPPQCP  | Negative |

|        |                       |          |
|--------|-----------------------|----------|
| P48745 | VAATQRCPPQCPGRCPATPP  | Negative |
| P48745 | LLGQVAATQRCPPQCPGRCP  | Negative |
| P48745 | LRKQCLCLTFLLLHLLGQVA  | Negative |
| P48745 | LTFLLLHLLGQVAATQRCPP  | Negative |
| P48745 | QVAATQRCPPQCPGRCPATP  | Negative |
| P48745 | FCLRKQCLCLTFLLLHLLGQ  | Negative |
| P48745 | LLHLLGQVAATQRCPPQCPG  | Negative |
| P48745 | QSTSFCLRKQCLCLTFLLLH  | Negative |
| P48745 | LCLTFLLLHLLGQVAATQRC  | Negative |
| P48745 | SFCLRKQCLCLTFLLLHLLG  | Negative |
| P48745 | CLRKQCLCLTFLLLHLLGQV  | Negative |
| P48745 | SVQSTSFCLRKQCLCLTFLL  | Negative |
| P48745 | AATQRCPPQCPGRCPATPPT  | Negative |
| P48745 | LHLLGQVAATQRCPPQCPGR  | Negative |
| P48745 | MQSVQSTSFCLRKQCLCLTF  | Negative |
| P48745 | RKQCLCLTFLLLHLLGQVAA  | Negative |
| P48745 | STSFCLRKQCLCLTFLLLHL  | Negative |
| P48745 | CLCLTFLLLHLLGQVAATQR  | Negative |
| P48745 | KQCLCLTFLLLHLLGQVAAT  | Negative |
| P48745 | GQVAATQRCPPQCPGRCPAT  | Negative |
| P48745 | LGQVAATQRCPPQCPGRCPA  | Negative |
| P48745 | VQSTSFCLRKQCLCLTFLLL  | Negative |
| P48816 | AKTFTRCGLVHELKKGFEFEE | Negative |
| P48816 | KLIIFALVVLCVGSEAKTFT  | Negative |
| P48816 | LVHELKKGFEENLMRNWVC   | Negative |
| P48816 | ELRKGFEENLMRNWVCLVE   | Negative |
| P48816 | CGLVHELKKGFEENLMRNW   | Negative |
| P48816 | VLCVGSEAKTFTRCGLVHEL  | Negative |
| P48816 | QKLIIFALVVLCVGSEAKTF  | Negative |
| P48816 | CVGSEAKTFTRCGLVHELK   | Negative |
| P48816 | SEAKTFTRCGLVHELKKGFE  | Negative |
| P48816 | IIFALVVLCVGSEAKTFTRC  | Negative |
| P48816 | TFTRCGLVHELKKGFEENL   | Negative |
| P48816 | GLVHELKKGFEENLMRNWV   | Negative |
| P48816 | FTRCGLVHELKKGFEENLM   | Negative |
| P48816 | FALVVLCVGSEAKTFTRCGL  | Negative |
| P48816 | ALVVLCVGSEAKTFTRCGLV  | Negative |
| P48816 | IFALVVLCVGSEAKTFTRCG  | Negative |
| P48816 | RCGLVHELKKGFEENLMRN   | Negative |
| P48816 | EAKTFTRCGLVHELKKGFE   | Negative |
| P48816 | LRKGFEENLMRNWVCLVEH   | Negative |
| P48816 | KTFTTRCGLVHELKKGFEEN  | Negative |
| P48816 | VHELKKGFEENLMRNWVCL   | Negative |
| P48816 | HELKKGFEENLMRNWVCLV   | Negative |
| P48816 | GSEAKTFTRCGLVHELKKG   | Negative |
| P48816 | LCVGSEAKTFTRCGLVHEL   | Negative |

|        |                        |          |
|--------|------------------------|----------|
| P48816 | LVVLCVGSEAKTFTRCGLVH   | Negative |
| P48816 | VGSEAKTFTRCGLVHEL RKH  | Negative |
| P48816 | MQKLIIFALVVLCVGSEAKT   | Negative |
| P48816 | TRCGLVHEL RKHGFEE NLMR | Negative |
| P48816 | VVLCVGSEAKTFTRCGLVHE   | Negative |
| P48819 | MAPLRPLLMLALLAWVALAD   | Negative |
| P48819 | LAWVALADQESCKGRCTDGF   | Negative |
| P48819 | ALADQESCKGRCTDGFIAER   | Negative |
| P48819 | LRPLLMLALLAWVALADQES   | Negative |
| P48819 | WVALADQESCKGRCTDGFIA   | Negative |
| P48819 | VALADQESCKGRCTDGFIAE   | Negative |
| P48819 | ADQESCKGRCTDGFIAERKC   | Negative |
| P48819 | LMLALLAWVALADQESCKGR   | Negative |
| P48819 | LADQESCKGRCTDGFIAERK   | Negative |
| P48819 | AWVALADQESCKGRCTDGF    | Negative |
| P48819 | ALLAWVALADQESCKGRCTD   | Negative |
| P48819 | GRCTDGFIAERKCQCDELCS   | Negative |
| P48819 | QESCKGRCTDGFIAERKCQC   | Negative |
| P48819 | APLRPLLMLALLAWVALADQ   | Negative |
| P48819 | TDGFIAERKCQCDELCSYYQ   | Negative |
| P48819 | MLALLAWVALADQESCKGRC   | Negative |
| P48819 | LLMLALLAWVALADQESCKG   | Negative |
| P48819 | SCKGRCTDGFIAERKCQCDE   | Negative |
| P48819 | PLRPLLMLALLAWVALADQE   | Negative |
| P48819 | KGRCTDGFIAERKCQCDEL    | Negative |
| P48819 | CKGRCTDGFIAERKCQCDEL   | Negative |
| P48819 | PLLMLALLAWVALADQESCK   | Negative |
| P48819 | DQESCKGRCTDGFIAERKCQ   | Negative |
| P48819 | RCTDGFIAERKCQCDELCSY   | Negative |
| P48819 | DGFIAERKCQCDELCSYYQS   | Negative |
| P48819 | CTDGFIAERKCQCDELCSYY   | Negative |
| P48819 | ESCKGRCTDGFIAERKCQCD   | Negative |
| P48819 | LALLAWVALADQESCKGRCT   | Negative |
| P48819 | LLAWVALADQESCKGRCTDG   | Negative |
| P48842 | LTYRGADISSLLLLLEDEGYS  | Negative |
| P48842 | AALTYRGADISSLLLLLEDEG  | Negative |
| P48842 | PLLTHAALTYRGADISSLLL   | Negative |
| P48842 | LLLLLEDEGYSYKNLNGQTQA  | Negative |
| P48842 | LLAALPLLTHAALTYRGADI   | Negative |
| P48842 | LLEDEGYSYKNLNGQTQALE   | Negative |
| P48842 | ISSLLLLLEDEGYSYKNLNGQ  | Negative |
| P48842 | ALTYRGADISSLLLLLEDEGY  | Negative |
| P48842 | DISSLLLLLEDEGYSYKNLNG  | Negative |
| P48842 | LTHAALTYRGADISSLLLLLE  | Negative |
| P48842 | ALPLLTHAALTYRGADISSL   | Negative |
| P48842 | THAALTYRGADISSLLLLLED  | Negative |



|        |                       |          |
|--------|-----------------------|----------|
| P48842 | SLLLAALPLLTHAALTYRGA  | Negative |
| P48842 | LPLLTHAALTYRGADISSLL  | Negative |
| P48842 | ADISSLLLLLEDEGYSYKNLN | Negative |
| P48842 | LAALPLLTHAALTYRGADIS  | Negative |
| P48842 | ASLLLAALPLLTHAALTYRG  | Negative |
| P48842 | MFASLLLAALPLLTHAALTY  | Negative |
| P48842 | LLLAALPLLTHAALTYRGAD  | Negative |
| P48842 | TYRGADISSLLLLLEDEGYSY | Negative |
| P48842 | YRGADISSLLLLLEDEGYSYK | Negative |
| P48842 | GADISSLLLLLEDEGYSYKNL | Negative |
| P48842 | SLLLLLEDEGYSYKNLNGQTQ | Negative |
| P48842 | RGADISSLLLLLEDEGYSYKN | Negative |
| P48842 | LLLEDEGYSYKNLNGQTQAL  | Negative |
| P48842 | HAALTYRGADISSLLLLLEDE | Negative |
| P48842 | SSLLLLLEDEGYSYKNLNGQT | Negative |
| P48842 | AALPLLTHAALTYRGADISS  | Negative |
| P48842 | LLTHAALTYRGADISSLLLL  | Negative |
| P48982 | RTTLAPLVLALALALPAAAA  | Negative |
| P48982 | ALALPAAAAATPESWPTFGTQ | Negative |
| P48982 | ESWPTFGTQGTQFVRDGKPY  | Negative |
| P48982 | WPTFGTQGTQFVRDGKPYQL  | Negative |
| P48982 | FGTQGTQFVRDGKPYQLLSG  | Negative |
| P48982 | PLVLALALALPAAAAATPESW | Negative |
| P48982 | MLRTTLAPLVLALALALPAA  | Negative |
| P48982 | AAATPESWPTFGTQGTQFVR  | Negative |
| P48982 | LRTTLAPLVLALALALPAAA  | Negative |
| P48982 | AATPESWPTFGTQGTQFVRD  | Negative |
| P48982 | TFGTQGTQFVRDGKPYQLLS  | Negative |
| P48982 | ALALALPAAAAATPESWPTFG | Negative |
| P48982 | LAPLVLALALALPAAAAATPE | Negative |
| P48982 | LVLALALALPAAAAATPESWP | Negative |
| P48982 | ATPESWPTFGTQGTQFVRDG  | Negative |
| P48982 | VLALALALPAAAAATPESWPT | Negative |
| P48982 | ALPAAAAATPESWPTFGTQGT | Negative |
| P48982 | TTLAPLVLALALALPAAAAAT | Negative |
| P48982 | PAAAAATPESWPTFGTQGTQF | Negative |
| P48982 | TPESWPTFGTQGTQFVRDGK  | Negative |
| P48982 | SWPTFGTQGTQFVRDGKPYQ  | Negative |
| P48982 | LALALALPAAAAATPESWPTF | Negative |
| P48982 | LALALPAAAAATPESWPTFGT | Negative |
| P48982 | LALPAAAAATPESWPTFGTQG | Negative |
| P48982 | TLAPLVLALALALPAAAAATP | Negative |
| P48982 | LPAAAAATPESWPTFGTQGTQ | Negative |
| P48982 | AAAATPESWPTFGTQGTQFV  | Negative |
| P48982 | PTFGTQGTQFVRDGKPYQLL  | Negative |
| P48982 | PESWPTFGTQGTQFVRDGKP  | Negative |

|        |                      |          |
|--------|----------------------|----------|
| P49051 | SPVAAAGKTFPDVPADHWGI | Negative |
| P49051 | MVAGVVSPVAAAGKTFPDVP | Negative |
| P49051 | GVVSPVAAAGKTFPDVPADH | Negative |
| P49051 | IAGTMTAAMVAGVVSPVAAA | Negative |
| P49051 | AGKTFPDVPADHWGIDSINY | Negative |
| P49051 | VAAAGKTFPDVPADHWGIDS | Negative |
| P49051 | AGTMTAAMVAGVVSPVAAAG | Negative |
| P49051 | VAGVVSPVAAAGKTFPDVPA | Negative |
| P49051 | AAMVAGVVSPVAAAGKTFPD | Negative |
| P49051 | YKKVIAGTMTAAMVAGVVSP | Negative |
| P49051 | VIAGTMTAAMVAGVVSPVAA | Negative |
| P49051 | NSYKKVIAGTMTAAMVAGVV | Negative |
| P49051 | AAAGKTFPDVPADHWGIDSI | Negative |
| P49051 | VVSPVAAAGKTFPDVPADHW | Negative |
| P49051 | KKVIAGTMTAAMVAGVVSPV | Negative |
| P49051 | AAGKTFPDVPADHWGIDSIN | Negative |
| P49051 | TAAMVAGVVSPVAAAGKTFP | Negative |
| P49051 | KVIAGTMTAAMVAGVVSPVA | Negative |
| P49051 | AGVVSPVAAAGKTFPDVPAD | Negative |
| P49051 | TNSYKKVIAGTMTAAMVAGV | Negative |
| P49051 | PVAAAGKTFPDVPADHWGID | Negative |
| P49051 | GTMTAAMVAGVVSPVAAAGK | Negative |
| P49051 | AKTNSYKKVIAGTMTAAMVA | Negative |
| P49051 | TMTAAMVAGVVSPVAAAGKT | Negative |
| P49051 | KTNSYKKVIAGTMTAAMVAG | Negative |
| P49051 | AMVAGVVSPVAAAGKTFPDV | Negative |
| P49051 | SYKKVIAGTMTAAMVAGVVS | Negative |
| P49051 | MAKTNSYKKVIAGTMTAAMV | Negative |
| P49051 | VSPVAAAGKTFPDVPADHWG | Negative |
| P49121 | TGKNAITSYGSYGCNCGWGH | Negative |
| P49121 | WIVALLVGVEGSLLELGKM  | Negative |
| P49121 | LLELGKMILQETGKNAITSY | Negative |
| P49121 | TLWIVALLVGVEGSLLELG  | Negative |
| P49121 | GVEGSLLELGKMILQETGKN | Negative |
| P49121 | MRTLWIVALLVGVEGSLLE  | Negative |
| P49121 | VALLVGVEGSLLELGKMIL  | Negative |
| P49121 | EGSLLELGKMILQETGKNAI | Negative |
| P49121 | KMILQETGKNAITSYGSYGC | Negative |
| P49121 | LLLVGVEGSLLELGKMILQE | Negative |
| P49121 | ETGKNAITSYGSYGCNCGWG | Negative |
| P49121 | ELGKMILQETGKNAITSYGS | Negative |
| P49121 | VEGSLLELGKMILQETGKNA | Negative |
| P49121 | LQETGKNAITSYGSYGCNCG | Negative |
| P49121 | LELGKMILQETGKNAITSYG | Negative |
| P49121 | LVGVEGSLLELGKMILQETG | Negative |
| P49121 | VGVEGSLLELGKMILQETGK | Negative |

|        |                       |          |
|--------|-----------------------|----------|
| P49121 | QETGKNAITSYGSYGCNCGW  | Negative |
| P49121 | GSLLELGKMILQETGKNAIT  | Negative |
| P49121 | LLVGVEGSLLLELGKMILQET | Negative |
| P49121 | SLLELGKMILQETGKNAITS  | Negative |
| P49121 | ILQETGKNAITSYGSYGCNC  | Negative |
| P49121 | LWIVALLLVGVEGSLLLELGK | Negative |
| P49121 | IVALLLVGVEGSLLLELGKMI | Negative |
| P49121 | LGKMILQETGKNAITSYGSY  | Negative |
| P49121 | MILQETGKNAITSYGSYGCN  | Negative |
| P49121 | GKMILQETGKNAITSYGSYG  | Negative |
| P49121 | GKNAITSYGSYGCNCGWGHR  | Negative |
| P49121 | ALLLVGVEGSLLLELGKMILQ | Negative |
| P49125 | PADIGCTDISQADFDEKNNN  | Negative |
| P49125 | SKLFFVFLCLIISVFAISP   | Negative |
| P49125 | VVFLCLIISVFAISPADIGC  | Negative |
| P49125 | DIGCTDISQADFDEKNNNCI  | Negative |
| P49125 | ISPADIGCTDISQADFDEKN  | Negative |
| P49125 | ISVFAISPADIGCTDISQAD  | Negative |
| P49125 | FFVVFLCLIISVFAISPADI  | Negative |
| P49125 | ADIGCTDISQADFDEKNNNC  | Negative |
| P49125 | VFLCLIISVFAISPADIGCT  | Negative |
| P49125 | CLIISVFAISPADIGCTDIS  | Negative |
| P49125 | LCLIISVFAISPADIGCTDI  | Negative |
| P49125 | GCTDISQADFDEKNNNCIKC  | Negative |
| P49125 | KLFFVFLCLIISVFAISPA   | Negative |
| P49125 | DISQADFDEKNNNCIKCGED  | Negative |
| P49125 | ISQADFDEKNNNCIKCGEDG  | Negative |
| P49125 | VFAISPADIGCTDISQADFD  | Negative |
| P49125 | FLCLIISVFAISPADIGCTD  | Negative |
| P49125 | IGCTDISQADFDEKNNNCIK  | Negative |
| P49125 | LIISVFAISPADIGCTDISQ  | Negative |
| P49125 | MSKLFFVFLCLIISVFAIS   | Negative |
| P49125 | SQADFDEKNNNCIKCGEDGF  | Negative |
| P49125 | FAISPADIGCTDISQADFDE  | Negative |
| P49125 | SVFAISPADIGCTDISQADF  | Negative |
| P49125 | SPADIGCTDISQADFDEKNN  | Negative |
| P49125 | CTDISQADFDEKNNNCIKCG  | Negative |
| P49125 | AISPADIGCTDISQADFDEK  | Negative |
| P49125 | TDISQADFDEKNNNCIKCGE  | Negative |
| P49125 | IISVFAISPADIGCTDISQA  | Negative |
| P49125 | FVVFLCLIISVFAISPADIG  | Negative |
| P49141 | APVIHGAEDSKCPLMVKVLD  | Negative |
| P49141 | AEDSKCPLMVKVLDVARGSP  | Negative |
| P49141 | DSKCPLMVKVLDVARGSPAV  | Negative |
| P49141 | LASLLFVSDAAPVIHGAEDS  | Negative |
| P49141 | GLASLLFVSDAAPVIHGAED  | Negative |

|        |                       |          |
|--------|-----------------------|----------|
| P49141 | GAEDSKCPLMVKVLDVAVRGS | Negative |
| P49141 | AFHSLLLLGLASLLFVSDAA  | Negative |
| P49141 | HSLLLLGLASLLFVSDAAPV  | Negative |
| P49141 | AAPVIHGAEDSKCPLMVKVL  | Negative |
| P49141 | SLLFVSDAAPVIHGAEDSKC  | Negative |
| P49141 | LGLASLLFVSDAAPVIHGAE  | Negative |
| P49141 | FHSLLLLGLASLLFVSDAAP  | Negative |
| P49141 | EDSKCPLMVKVLDVAVRGSPA | Negative |
| P49141 | LLFVSDAAPVIHGAEDSKCP  | Negative |
| P49141 | SKCPLMVKVLDVAVRGSPAVN | Negative |
| P49141 | IHGAEDSKCPLMVKVLDVAVR | Negative |
| P49141 | VSDAAPVIHGAEDSKCPLMV  | Negative |
| P49141 | LLGLASLLFVSDAAPVIHGA  | Negative |
| P49141 | SDAAPVIHGAEDSKCPLMVK  | Negative |
| P49141 | VIHGAEDSKCPLMVKVLDVAV | Negative |
| P49141 | LLLGLASLLFVSDAAPVIHG  | Negative |
| P49141 | MAFHSLLLLGLASLLFVSDA  | Negative |
| P49141 | SLLLLGLASLLFVSDAAPVI  | Negative |
| P49141 | DAAPVIHGAEDSKCPLMVKV  | Negative |
| P49141 | PVIHGAEDSKCPLMVKVLDV  | Negative |
| P49141 | ASLLFVSDAAPVIHGAEDSK  | Negative |
| P49141 | HGAEDSKCPLMVKVLDVAVRG | Negative |
| P49141 | LFVSDAAPVIHGAEDSKCPL  | Negative |
| P49141 | FVSDAAPVIHGAEDSKCPLM  | Negative |
| P49182 | NLTTSFLPANFHKENTVTND  | Negative |
| P49182 | LTNENLTTSFLPANFHKENT  | Negative |
| P49182 | ITFMCIGSKGLAEQLTNENL  | Negative |
| P49182 | EQLTNENLTTSFLPANFHK   | Negative |
| P49182 | TLLSLITFMCIGSKGLAEQL  | Negative |
| P49182 | GSKGLAEQLTNENLTTSFLP  | Negative |
| P49182 | KHPLCTLLSLITFMCIGSKG  | Negative |
| P49182 | CIGSKGLAEQLTNENLTTSF  | Negative |
| P49182 | PLCTLLSLITFMCIGSKGLA  | Negative |
| P49182 | CTLLSLITFMCIGSKGLAEQ  | Negative |
| P49182 | NENLTTSFLPANFHKENTVT  | Negative |
| P49182 | IGSKGLAEQLTNENLTTSFL  | Negative |
| P49182 | ENLTTSFLPANFHKENTVTN  | Negative |
| P49182 | HPLCTLLSLITFMCIGSKGL  | Negative |
| P49182 | LCTLLSLITFMCIGSKGLAE  | Negative |
| P49182 | KGLAEQLTNENLTTSFLPAN  | Negative |
| P49182 | LLSLITFMCIGSKGLAEQLT  | Negative |
| P49182 | SKGLAEQLTNENLTTSFLPA  | Negative |
| P49182 | TFMCIGSKGLAEQLTNENLT  | Negative |
| P49182 | FMCIGSKGLAEQLTNENLTT  | Negative |
| P49182 | MKHPLCTLLSLITFMCIGSK  | Negative |
| P49182 | LAEQLTNENLTTSFLPANFH  | Negative |

|        |                      |          |
|--------|----------------------|----------|
| P49182 | LITFMCIGSKGLAEQLTNEN | Negative |
| P49182 | AEQLTNENLTTSFLPANFHK | Negative |
| P49182 | GLAEQLTNENLTTSFLPANF | Negative |
| P49182 | TNENLTTSFLPANFHKENTV | Negative |
| P49182 | MCIGSKGLAEQLTNENLTTS | Negative |
| P49182 | SLITFMCIGSKGLAEQLTNE | Negative |
| P49182 | QLTNENLTTSFLPANFHKEN | Negative |
| P49250 | VFAHGSEAHMVPLDKTLQEF | Negative |
| P49250 | SPVFAHGSEAHMVPLDKTLQ | Negative |
| P49250 | ALALAVAVVCAWQSPVFAHG | Negative |
| P49250 | FSPRKTALALAVAVVCAWQS | Negative |
| P49250 | MANGLKFSPRKTALALAVAV | Negative |
| P49250 | PVFAHGSEAHMVPLDKTLQE | Negative |
| P49250 | QSPVFAHGSEAHMVPLDKTL | Negative |
| P49250 | LALAVAVVCAWQSPVFAHGS | Negative |
| P49250 | GLKFSPRKTALALAVAVVCA | Negative |
| P49250 | NGLKFSPRKTALALAVAVVC | Negative |
| P49250 | AVAVVCAWQSPVFAHGSEAH | Negative |
| P49250 | AWQSPVFAHGSEAHMVPLDK | Negative |
| P49250 | ALAVAVVCAWQSPVFAHGSE | Negative |
| P49250 | PRKTALALAVAVVCAWQSPV | Negative |
| P49250 | LKFSPRKTALALAVAVVCAW | Negative |
| P49250 | VAVVCAWQSPVFAHGSEAHM | Negative |
| P49250 | TALALAVAVVCAWQSPVFAH | Negative |
| P49250 | ANGLKFSPRKTALALAVAVV | Negative |
| P49250 | AHGSEAHMVPLDKTLQEFGA | Negative |
| P49250 | AVVCAWQSPVFAHGSEAHMV | Negative |
| P49250 | VVCAWQSPVFAHGSEAHMVP | Negative |
| P49250 | KTALALAVAVVCAWQSPVFA | Negative |
| P49250 | KFSPRKTALALAVAVVCAWQ | Negative |
| P49250 | WQSPVFAHGSEAHMVPLDKT | Negative |
| P49250 | VCAWQSPVFAHGSEAHMVPL | Negative |
| P49250 | CAWQSPVFAHGSEAHMVPLD | Negative |
| P49250 | RKTALALAVAVVCAWQSPVF | Negative |
| P49250 | SPRKTALALAVAVVCAWQSP | Negative |
| P49250 | FAHGSEAHMVPLDKTLQEFG | Negative |
| P49252 | LHTQHPLDPITKEEFLAVQT | Negative |
| P49252 | SFTPLHTQHPLDPITKEEFL | Negative |
| P49252 | VFSFTPLHTQHPLDPITKEE | Negative |
| P49252 | DPITKEEFLAVQTIVQNKYP | Negative |
| P49252 | HTQHPLDPITKEEFLAVQTI | Negative |
| P49252 | ALFSVLTLTSFHAVFSFTPL | Negative |
| P49252 | HPLDPITKEEFLAVQTIVQN | Negative |
| P49252 | FHAVFSFTPLHTQHPLDPIT | Negative |
| P49252 | FALFSVLTLTSFHAVFSFTP | Negative |
| P49252 | SFHAVFSFTPLHTQHPLDPI | Negative |

|        |                      |          |
|--------|----------------------|----------|
| P49252 | PLDPITKEEFLAVQTIVQNK | Negative |
| P49252 | LSFHAVFSFTPLHTQHPLDP | Negative |
| P49252 | LTLFSFHAVFSFTPLHTQHP | Negative |
| P49252 | TQHPLDPITKEEFLAVQTIV | Negative |
| P49252 | SVLTLLSFHAVFSFTPLHTQ | Negative |
| P49252 | LLSFHAVFSFTPLHTQHPLD | Negative |
| P49252 | KFALFSVLTLFSFHAVFSFT | Negative |
| P49252 | TPLHTQHPLDPITKEEFLAV | Negative |
| P49252 | PLHTQHPLDPITKEEFLAVQ | Negative |
| P49252 | QHPLDPITKEEFLAVQTIVQ | Negative |
| P49252 | FSFTPLHTQHPLDPITKEEF | Negative |
| P49252 | TLLSFHAVFSFTPLHTQHPL | Negative |
| P49252 | FTPLHTQHPLDPITKEEFLA | Negative |
| P49252 | FSVLTLFSFHAVFSFTPLHT | Negative |
| P49252 | VLTLFSFHAVFSFTPLHTQH | Negative |
| P49252 | LDPITKEEFLAVQTIVQNKY | Negative |
| P49252 | AVFSFTPLHTQHPLDPITKE | Negative |
| P49252 | HAVFSFTPLHTQHPLDPITK | Negative |
| P49252 | PITKEEFLAVQTIVQNKYPI | Negative |
| P49278 | QVDVKDCANHEIKKVLVPGC | Negative |
| P49278 | DCANHEIKKVLVPGCHGSEP | Negative |
| P49278 | SLLVAAVARDQVDVKDCANH | Negative |
| P49278 | EIKKVLVPGCHGSEPCIIHR | Negative |
| P49278 | MYKILCLSLVAAVARDQVD  | Negative |
| P49278 | LCLSLLVAAVARDQVDVKDC | Negative |
| P49278 | VAAVARDQVDVKDCANHEIK | Negative |
| P49278 | ANHEIKKVLVPGCHGSEPCI | Negative |
| P49278 | KDCANHEIKKVLVPGCHGSE | Negative |
| P49278 | ILCLSLLVAAVARDQVDVKD | Negative |
| P49278 | LVAAVARDQVDVKDCANHEI | Negative |
| P49278 | VARDQVDVKDCANHEIKKVL | Negative |
| P49278 | VDVKDCANHEIKKVLVPGCH | Negative |
| P49278 | KILCLSLLVAAVARDQVDVK | Negative |
| P49278 | RDQVDVKDCANHEIKKVLVP | Negative |
| P49278 | AAVARDQVDVKDCANHEIKK | Negative |
| P49278 | ARDQVDVKDCANHEIKKVLV | Negative |
| P49278 | LSLLVAAVARDQVDVKDCAN | Negative |
| P49278 | DQVDVKDCANHEIKKVLVPG | Negative |
| P49278 | NHEIKKVLVPGCHGSEPCII | Negative |
| P49278 | CANHEIKKVLVPGCHGSEPC | Negative |
| P49278 | MMYKILCLSLLVAAVARDQV | Negative |
| P49278 | IKKVLVPGCHGSEPCIIHRG | Negative |
| P49278 | DVKDCANHEIKKVLVPGCHG | Negative |
| P49278 | LLVAAVARDQVDVKDCANHE | Negative |
| P49278 | HEIKKVLVPGCHGSEPCIIH | Negative |
| P49278 | CLSLLVAAVARDQVDVKDCA | Negative |

|        |                      |          |
|--------|----------------------|----------|
| P49278 | VKDCANHEIKKVLVPGCHGS | Negative |
| P49278 | AVARDQVDVKDCANHEIKKV | Negative |
| P49763 | LFPCFLQLLAGLALPAVPPQ | Negative |
| P49763 | SAGNGSSEVEVVPFQEVWGR | Negative |
| P49763 | MPVMRLFPCFLQLLAGLALP | Negative |
| P49763 | AGLALPAVPPQQWALSAGNG | Negative |
| P49763 | AVPPQQWALSAGNGSSEVEV | Negative |
| P49763 | LPAVPPQQWALSAGNGSSEV | Negative |
| P49763 | ALPAVPPQQWALSAGNGSSE | Negative |
| P49763 | ALSAGNGSSEVEVVPFQEVW | Negative |
| P49763 | RLFPCFLQLLAGLALPAVPP | Negative |
| P49763 | CFLQLLAGLALPAVPPQQWA | Negative |
| P49763 | QLLAGLALPAVPPQQWALSA | Negative |
| P49763 | PVMRLFPCFLQLLAGLALPA | Negative |
| P49763 | LAGLALPAVPPQQWALSAGN | Negative |
| P49763 | PPQQWALSAGNGSSEVEVVP | Negative |
| P49763 | LQLLAGLALPAVPPQQWALS | Negative |
| P49763 | WALSAGNGSSEVEVVPFQEV | Negative |
| P49763 | GLALPAVPPQQWALSAGNGS | Negative |
| P49763 | VPPQQWALSAGNGSSEVEVV | Negative |
| P49763 | LSAGNGSSEVEVVPFQEVWG | Negative |
| P49763 | PQQWALSAGNGSSEVEVVPF | Negative |
| P49763 | VMRLFPCFLQLLAGLALPAV | Negative |
| P49763 | PCFLQLLAGLALPAVPPQQW | Negative |
| P49763 | LALPAVPPQQWALSAGNGSS | Negative |
| P49763 | FLQLLAGLALPAVPPQQWAL | Negative |
| P49763 | FPCFLQLLAGLALPAVPPQQ | Negative |
| P49763 | QWALSAGNGSSEVEVVPFQE | Negative |
| P49763 | QQWALSAGNGSSEVEVVPFQ | Negative |
| P49763 | PAVPPQQWALSAGNGSSEVE | Negative |
| P49763 | LLAGLALPAVPPQQWALSAG | Negative |
| P49767 | LLAAALLPGPREAPAAAAAF | Negative |
| P49767 | AAFESGLDLSDAEPDAGEAT | Negative |
| P49767 | GPREAPAAAAAFESGLDLS  | Negative |
| P49767 | AAALLPGPREAPAAAAAFES | Negative |
| P49767 | AALLPGPREAPAAAAAFESG | Negative |
| P49767 | HLLGFFSVACSLLAALLPG  | Negative |
| P49767 | CSLLAAALLPGPREAPAAAA | Negative |
| P49767 | SVACSLLAALLPGPREAPA  | Negative |
| P49767 | APAAAAAFESGLDLSDAEPD | Negative |
| P49767 | LLPGPREAPAAAAAFESGLD | Negative |
| P49767 | FFSVACSLLAALLPGPREA  | Negative |
| P49767 | ACSLLAALLPGPREAPAAA  | Negative |
| P49767 | PREAPAAAAAFESGLDLSDA | Negative |
| P49767 | FSVACSLLAALLPGPREAP  | Negative |
| P49767 | MHLLGFFSVACSLLAALLP  | Negative |

|        |                      |          |
|--------|----------------------|----------|
| P49767 | PAAAAAFESGLDLSDAEPDA | Negative |
| P49767 | GFFSVACSLLAALLPGPRE  | Negative |
| P49767 | REAPAAAAAFESGLDLSDAE | Negative |
| P49767 | AAAFESGLDLSDAEPDAGEA | Negative |
| P49767 | LLGFFSVACSLLAALLPGP  | Negative |
| P49767 | LGFFSVACSLLAALLPGPR  | Negative |
| P49767 | EAPAAAAAFESGLDLSDAEP | Negative |
| P49767 | PGPREAPAAAAAFESGLDLS | Negative |
| P49767 | LAAALLPGPREAPAAAAAFE | Negative |
| P49767 | AAAAAFESGLDLSDAEPDAG | Negative |
| P49767 | VACSLLAALLPGPREAPAA  | Negative |
| P49767 | AAAAFESGLDLSDAEPDAGE | Negative |
| P49767 | LPGPREAPAAAAAFESGLDL | Negative |
| P49767 | SLLAALLPGPREAPAAAAA  | Negative |
| P49862 | MARSLLLPLQILLSLALET  | Negative |
| P49862 | QILLSLALETAGEEAQGDK  | Negative |
| P49862 | QGDKIIDGAPCARGSHPWQV | Negative |
| P49862 | TAGEEAQGDKIIDGAPCARG | Negative |
| P49862 | LLPLQILLSLALETAGEEA  | Negative |
| P49862 | LALETAGEEAQGDKIIDGAP | Negative |
| P49862 | ILLSLALETAGEEAQGDKI  | Negative |
| P49862 | LQILLSLALETAGEEAQGD  | Negative |
| P49862 | LLLPLQILLSLALETAGEE  | Negative |
| P49862 | IIDGAPCARGSHPWQVALLS | Negative |
| P49862 | SLALETAGEEAQGDKIIDGA | Negative |
| P49862 | LSLALETAGEEAQGDKIIDG | Negative |
| P49862 | LPLQILLSLALETAGEEAQ  | Negative |
| P49862 | EAQGDKIIDGAPCARGSHPW | Negative |
| P49862 | ARSLLLPLQILLSLALETA  | Negative |
| P49862 | GDKIIDGAPCARGSHPWQVA | Negative |
| P49862 | KIIDGAPCARGSHPWQVALL | Negative |
| P49862 | LETAGEEAQGDKIIDGAPCA | Negative |
| P49862 | LLSLALETAGEEAQGDKII  | Negative |
| P49862 | ALETAGEEAQGDKIIDGAPC | Negative |
| P49862 | RSLLLPLQILLSLALETAG  | Negative |
| P49862 | DKIIDGAPCARGSHPWQVAL | Negative |
| P49862 | GEEAQGDKIIDGAPCARGSH | Negative |
| P49862 | LLSLALETAGEEAQGDKIID | Negative |
| P49862 | ETAGEEAQGDKIIDGAPCAR | Negative |
| P49862 | AGEEAQGDKIIDGAPCARGS | Negative |
| P49862 | EEAQGDKIIDGAPCARGSHP | Negative |
| P49862 | SLLLPLQILLSLALETAGE  | Negative |
| P49862 | AQGDKIIDGAPCARGSHPWQ | Negative |
| P49921 | HWSYGLRPGGKRNAENVIDS | Negative |
| P49921 | SYGLRPGGKRNAENVIDSFQ | Negative |
| P49921 | YGLRPGGKRNAENVIDSFQE | Negative |



|        |                      |          |
|--------|----------------------|----------|
| P49921 | LLLTLCVVGCSSQHWSYGLR | Negative |
| P49921 | LCVVGCSSQHWSYGLRPGGK | Negative |
| P49921 | CVVGCSSQHWSYGLRPGGKR | Negative |
| P49921 | LTLCVVGCSSQHWSYGLRPG | Negative |
| P49921 | EPIPKLLAGLLLLTLCVVGC | Negative |
| P49921 | GLRPGGKRNAENVIDSFQEM | Negative |
| P49921 | GLLLTLCVVGCSSQHWSYG  | Negative |
| P49921 | VVGCSSQHWSYGLRPGGKRN | Negative |
| P49921 | SSQHWSYGLRPGGKRNAENV | Negative |
| P49921 | GCSSQHWSYGLRPGGKRNAE | Negative |
| P49921 | LLTLCVVGCSSQHWSYGLRP | Negative |
| P49921 | SQHWSYGLRPGGKRNAENVI | Negative |
| P49921 | LLAGLLLLTLCVVGCSSQHW | Negative |
| P49921 | LLLLTLCVVGCSSQHWSYGL | Negative |
| P49921 | LRPGGKRNAENVIDSFQEMA | Negative |
| P49921 | LAGLLLLTLCVVGCSSQHWS | Negative |
| P49921 | PIPKLLAGLLLLTLCVVGCS | Negative |
| P49921 | CSSQHWSYGLRPGGKRNAEN | Negative |
| P49921 | PKLLAGLLLLTLCVVGCSSQ | Negative |
| P49921 | WSYGLRPGGKRNAENVIDSF | Negative |
| P49921 | IPKLLAGLLLLTLCVVGCSS | Negative |
| P49921 | KLLAGLLLLTLCVVGCSSQH | Negative |
| P49921 | TLCVVGCSSQHWSYGLRPGG | Negative |
| P49921 | VGCSSQHWSYGLRPGGKRNA | Negative |
| P49921 | MEPIPKLLAGLLLLTLCVVG | Negative |
| P49921 | QHWSYGLRPGGKRNAENVID | Negative |
| P50228 | LLFTLPQHLEAAAPSSVIAA | Negative |
| P50228 | LAFLLLFTLPQHLEAAAPSS | Negative |
| P50228 | ARIPSGSISPFMRMAPLAFL | Negative |
| P50228 | LQLRSSARIPSGSISPFMRM | Negative |
| P50228 | RIPSGSISPFMRMAPLAFL  | Negative |
| P50228 | RMAPLAFLLLFTLPQHLEAA | Negative |
| P50228 | RSSARIPSGSISPFMRMAPL | Negative |
| P50228 | GSISPFMRMAPLAFLLLFTL | Negative |
| P50228 | SPFMRMAPLAFLLLFTLPQH | Negative |
| P50228 | QLRSSARIPSGSISPFMRMA | Negative |
| P50228 | SARIPSGSISPFMRMAPLAF | Negative |
| P50228 | MAPLAFLLLFTLPQHLEAA  | Negative |
| P50228 | LFTLPQHLEAAAPSSVIAAT | Negative |
| P50228 | FLLFTLPQHLEAAAPSSVI  | Negative |
| P50228 | FMRMAPLAFLLLFTLPQH   | Negative |
| P50228 | PLAFLLLFTLPQHLEAAAPS | Negative |
| P50228 | SGSISPFMRMAPLAFLLLFT | Negative |
| P50228 | SSARIPSGSISPFMRMAPLA | Negative |
| P50228 | MSLQLRSSARIPSGSISPFM | Negative |
| P50228 | PFMRMAPLAFLLLFTLPQHL | Negative |

|        |                      |          |
|--------|----------------------|----------|
| P50228 | PSGSISPFMRMAPLAFLLLF | Negative |
| P50228 | APLAFLLLFTLPQHLAEAAP | Negative |
| P50228 | MRMAPLAFLLLFTLPQHLAE | Negative |
| P50228 | IPSGSISPFMRMAPLAFLLL | Negative |
| P50228 | SISPFMRMAPLAFLLLFTLP | Negative |
| P50228 | LLLFTLPQHLAEAAPSSVIA | Negative |
| P50228 | SLQLRSSARIPSGSISPFMR | Negative |
| P50228 | LRSSARIPSGSISPFMRMAP | Negative |
| P50228 | ISPFMRMAPLAFLLLFTLPQ | Negative |
| P50229 | MALWNEVFSAPYGADTPTAC | Negative |
| P50229 | CTMALWNEVFSAPYGADTPT | Negative |
| P50229 | FSAPYGADTPTACCFSYGRQ | Negative |
| P50229 | SAPYGADTPTACCFSYGRQI | Negative |
| P50229 | DTPTACCFSYGRQIPRKFI  | Negative |
| P50229 | LLCTMALWNEVFSAPYGADT | Negative |
| P50229 | VFSAPYGADTPTACCFSYGR | Negative |
| P50229 | STAALAVLLCTMALWNEVFS | Negative |
| P50229 | VSTAALAVLLCTMALWNEVF | Negative |
| P50229 | ADTPTACCFSYGRQIPRKFI | Negative |
| P50229 | ALAVLLCTMALWNEVFSAPY | Negative |
| P50229 | NEVFSAPYGADTPTACCFSY | Negative |
| P50229 | LCTMALWNEVFSAPYGADTP | Negative |
| P50229 | WNEVFSAPYGADTPTACCF  | Negative |
| P50229 | GADTPTACCFSYGRQIPRK  | Negative |
| P50229 | AALAVLLCTMALWNEVFSAP | Negative |
| P50229 | MKVSTAALAVLLCTMALWNE | Negative |
| P50229 | LAVLLCTMALWNEVFSAPYG | Negative |
| P50229 | TPTACCFSYGRQIPRKFIAD | Negative |
| P50229 | EVFSAPYGADTPTACCFSYG | Negative |
| P50229 | YGADTPTACCFSYGRQIPRK | Negative |
| P50229 | VLLCTMALWNEVFSAPYGAD | Negative |
| P50229 | PYGADTPTACCFSYGRQIPR | Negative |
| P50229 | APYGADTPTACCFSYGRQIP | Negative |
| P50229 | KVSTAALAVLLCTMALWNEV | Negative |
| P50229 | TMALWNEVFSAPYGADTPTA | Negative |
| P50229 | LWNEVFSAPYGADTPTACCF | Negative |
| P50229 | ALWNEVFSAPYGADTPTACC | Negative |
| P50229 | TAALAVLLCTMALWNEVFS  | Negative |
| P50401 | VRRRVRAVATAATATALVAV | Negative |
| P50401 | ALVAVPLTTLATSASAAPVH | Negative |
| P50401 | RAGVRRRVRAVATAATATAL | Negative |
| P50401 | VAVPLTTLATSASAAPVHVD | Negative |
| P50401 | STLGKRAGVRRRVRAVATAA | Negative |
| P50401 | GKRAGVRRRVRAVATAATAT | Negative |
| P50401 | TLGKRAGVRRRVRAVATAAT | Negative |
| P50401 | VATAATATALVAVPLTTLAT | Negative |

|        |                       |          |
|--------|-----------------------|----------|
| P50401 | TALVAVPLTTLATSASAAPV  | Negative |
| P50401 | AVATAATATALVAVPLTTLA  | Negative |
| P50401 | RAVATAATATALVAVPLTTL  | Negative |
| P50401 | RVRAVATAATATALVAVPLT  | Negative |
| P50401 | TATALVAVPLTTLATSASAA  | Negative |
| P50401 | VRAVATAATATALVAVPLTT  | Negative |
| P50401 | GVRRRVRAVATAATATALVA  | Negative |
| P50401 | KRAGVRRRVRAVATAATATA  | Negative |
| P50401 | AVPLTTLATSASAAPVHVDN  | Negative |
| P50401 | ATALVAVPLTTLATSASAAP  | Negative |
| P50401 | TAATATALVAVPLTTLATSA  | Negative |
| P50401 | RRVRAVATAATATALVAVPL  | Negative |
| P50401 | AATATALVAVPLTTLATSAS  | Negative |
| P50401 | ATATALVAVPLTTLATSASA  | Negative |
| P50401 | LGKRAGVRRRVRAVATAATA  | Negative |
| P50401 | VPLTTLATSASAAPVHVDNP  | Negative |
| P50401 | AGVRRRVRAVATAATATALV  | Negative |
| P50401 | RRRVRAVATAATATALVAVP  | Negative |
| P50401 | ATAATATALVAVPLTTLATS  | Negative |
| P50401 | MSTLGKRAGVRRRVRAVATA  | Negative |
| P50401 | PLTTLATSASAAPVHVDNPY  | Negative |
| P50448 | LLLLAGDRVTSDMIVGPGNL  | Negative |
| P50448 | TSDMIVGPGNLQEGESEGDS  | Negative |
| P50448 | RVTSDMIVGPGNLQEGESE   | Negative |
| P50448 | VGPGNLQEGESEGDSQKGGI  | Negative |
| P50448 | LTPLTLLLLLLLAGDRVTSD  | Negative |
| P50448 | GDRVTSDMIVGPGNLQEGES  | Negative |
| P50448 | LLLAGDRVTSDMIVGPGNLQ  | Negative |
| P50448 | DMIVGPGNLQEGESEGDSQK  | Negative |
| P50448 | LLAGDRVTSDMIVGPGNLQE  | Negative |
| P50448 | GNLQEGESEGDSQKGGILDG  | Negative |
| P50448 | SRLTPLTLLLLLLLAGDRVT  | Negative |
| P50448 | LLLLLAGDRVTSDMIVGPGN  | Negative |
| P50448 | LAGDRVTSDMIVGPGNLQEG  | Negative |
| P50448 | AGDRVTSDMIVGPGNLQEGE  | Negative |
| P50448 | IVGPGNLQEGESEGDSQKGG  | Negative |
| P50448 | LLLLLLLAGDRVTSDMIVGPG | Negative |
| P50448 | LTLLLLLLLAGDRVTSDMIV  | Negative |
| P50448 | PGNLQEGESEGDSQKGGILD  | Negative |
| P50448 | TPLTLLLLLLLAGDRVTSDM  | Negative |
| P50448 | GPGNLQEGESEGDSQKGGIL  | Negative |
| P50448 | VTSDMIVGPGNLQEGESEGD  | Negative |
| P50448 | DRVTSDMIVGPGNLQEGESE  | Negative |
| P50448 | LLLLLLLAGDRVTSDMIVGP  | Negative |
| P50448 | PLTLLLLLLLAGDRVTSDMI  | Negative |
| P50448 | MIVGPGNLQEGESEGDSQKG  | Negative |

|        |                       |          |
|--------|-----------------------|----------|
| P50448 | MASRLTPLTLLLLLLLAGDR  | Negative |
| P50448 | SDMIVGPGNLQEGESEGDSQ  | Negative |
| P50448 | RLTPLTLLLLLLLAGDRVTS  | Negative |
| P50448 | ASRLTPLTLLLLLLLAGDRV  | Negative |
| P50470 | KNYSLRKLKTGTASVAVALT  | Negative |
| P50470 | KKNYSLRKLKTGTASVAVAL  | Negative |
| P50470 | GAGFANQTTVKAEGAKIDWQ  | Negative |
| P50470 | RQQTCKKNYSLRKLKTGTASV | Negative |
| P50470 | ASVAVALTVLGAGFANQTTV  | Negative |
| P50470 | LGAGFANQTTVKAEGAKIDW  | Negative |
| P50470 | KTGTASVAVALTVLGAGFAN  | Negative |
| P50470 | MTRQQTCKKNYSLRKLKTGTA | Negative |
| P50470 | AVALTVLGAGFANQTTVKA   | Negative |
| P50470 | LTVLGAGFANQTTVKAEGAK  | Negative |
| P50470 | NYSLRKLKTGTASVAVALTV  | Negative |
| P50470 | GTASVAVALTVLGAGFANQT  | Negative |
| P50470 | VALTVLGAGFANQTTVKAEG  | Negative |
| P50470 | LRKLKTGTASVAVALTVLGA  | Negative |
| P50470 | TASVAVALTVLGAGFANQTT  | Negative |
| P50470 | ALTVLGAGFANQTTVKAEGA  | Negative |
| P50470 | VLGAGFANQTTVKAEGAKID  | Negative |
| P50470 | VAVALTVLGAGFANQTTVKA  | Negative |
| P50470 | KLKTGTASVAVALTVLGAGF  | Negative |
| P50470 | LKTGTASVAVALTVLGAGFA  | Negative |
| P50470 | QTKKNYSLRKLKTGTASVAV  | Negative |
| P50470 | YSLRKLKTGTASVAVALTVL  | Negative |
| P50470 | TKKNYSLRKLKTGTASVAVA  | Negative |
| P50470 | TGTASVAVALTVLGAGFANQ  | Negative |
| P50470 | SVAVALTVLGAGFANQTTVK  | Negative |
| P50470 | QQTCKKNYSLRKLKTGTASVA | Negative |
| P50470 | TRQQTCKKNYSLRKLKTGTAS | Negative |
| P50470 | RKLKTGTASVAVALTVLGAG  | Negative |
| P50470 | SLRKLKTGTASVAVALTVLG  | Negative |
| P50694 | FKNNCPYMWPGTLTSDQKP   | Negative |
| P50694 | TILSFGGAHAATISFKNNCP  | Negative |
| P50694 | VLSLSLTILSFGGAHAATIS  | Negative |
| P50694 | ISFKNNCPYMWPGTLTSDQ   | Negative |
| P50694 | AATISFKNNCPYMWPGTLT   | Negative |
| P50694 | SLSLTILSFGGAHAATISFK  | Negative |
| P50694 | LSFGGAHAATISFKNNCPYM  | Negative |
| P50694 | GAHAATISFKNNCPYMWPG   | Negative |
| P50694 | LTILSFGGAHAATISFKNNC  | Negative |
| P50694 | SLTILSFGGAHAATISFKNN  | Negative |
| P50694 | KNNCPYMWPGTLTSDQKPQ   | Negative |
| P50694 | LVVVLSSLTILSFGGAHAA   | Negative |
| P50694 | VVVLSSLTILSFGGAHAAT   | Negative |

|        |                      |          |
|--------|----------------------|----------|
| P50694 | ILSFGGAHAATISFKNNCPY | Negative |
| P50694 | SFGGAHAATISFKNNCPYMV | Negative |
| P50694 | ATISFKNNCPYMWPGTLTS  | Negative |
| P50694 | SFKNNCPYMWPGTLTSDQK  | Negative |
| P50694 | VVLSLSLTILSFGGAHAATI | Negative |
| P50694 | TLVVVLSLSLTILSFGGAHA | Negative |
| P50694 | MMKTLVVVLSLSLTILSFGG | Negative |
| P50694 | LSLTILSFGGAHAATISFKN | Negative |
| P50694 | HAATISFKNNCPYMWPGTL  | Negative |
| P50694 | TISFKNNCPYMWPGTLTSD  | Negative |
| P50694 | NNCPYMWPGTLTSDQKPQL  | Negative |
| P50694 | AHAATISFKNNCPYMWPGT  | Negative |
| P50694 | FGGAHAATISFKNNCPYMW  | Negative |
| P50694 | GGAHAATISFKNNCPYMW   | Negative |
| P50694 | MKTLVVVLSLSLTILSFGGA | Negative |
| P50694 | KTLVVVLSLSLTILSFGGAH | Negative |
| P50828 | ARALGTVEAPWLLGLCCSLA | Negative |
| P50828 | HPLSLTAGPKHGAEGRNESK | Negative |
| P50828 | IAHPLSLTAGPKHGAEGRNE | Negative |
| P50828 | VEAPWLLGLCCSLAIAHPLS | Negative |
| P50828 | LSLTAGPKHGAEGRNESKPD | Negative |
| P50828 | WLLGLCCSLAIAHPLSLTAG | Negative |
| P50828 | AGPKHGAEGRNESKPDV    | Negative |
| P50828 | TAGPKHGAEGRNESKPDV   | Negative |
| P50828 | AIAHPLSLTAGPKHGAEGRN | Negative |
| P50828 | CCSLAIAHPLSLTAGPKHGA | Negative |
| P50828 | LLGLCCSLAIAHPLSLTAGP | Negative |
| P50828 | TVEAPWLLGLCCSLAIAHPL | Negative |
| P50828 | SLTAGPKHGAEGRNESKPD  | Negative |
| P50828 | GLCCSLAIAHPLSLTAGPKH | Negative |
| P50828 | LTAGPKHGAEGRNESKPD   | Negative |
| P50828 | RALGTVEAPWLLGLCCSLAI | Negative |
| P50828 | PWLLGLCCSLAIAHPLSLTA | Negative |
| P50828 | LGTVEAPWLLGLCCSLAIAH | Negative |
| P50828 | LCCSLAIAHPLSLTAGPKHG | Negative |
| P50828 | GTVEAPWLLGLCCSLAIAHP | Negative |
| P50828 | APWLLGLCCSLAIAHPLSLT | Negative |
| P50828 | AHPLSLTAGPKHGAEGRNES | Negative |
| P50828 | CSLAIAHPLSLTAGPKHGAE | Negative |
| P50828 | ALGTVEAPWLLGLCCSLAIA | Negative |
| P50828 | LAIAHPLSLTAGPKHGAEGR | Negative |
| P50828 | PLSLTAGPKHGAEGRNESKP | Negative |
| P50828 | MARALGTVEAPWLLGLCCSL | Negative |
| P50828 | SLAIAHPLSLTAGPKHGAEG | Negative |
| P50828 | EAPWLLGLCCSLAIAHPLSL | Negative |
| P51456 | ALLFYLLGFCLLQGQVTGRV | Negative |

|        |                       |          |
|--------|-----------------------|----------|
| P51456 | VTGRVTYEWMMENVKICRND  | Negative |
| P51456 | PALLFYLLGFCLLQGQVTGR  | Negative |
| P51456 | GQVTGRVTYEWMMENVKICR  | Negative |
| P51456 | LLQGQVTGRVTYEWMMENVK  | Negative |
| P51456 | WMMENVKICRNDFVRTAIEV  | Negative |
| P51456 | TYEWMMENVKICRNDFVRTA  | Negative |
| P51456 | MMENVKICRNDFVRTAIEVC  | Negative |
| P51456 | TGRVTYEWMMENVKICRNDF  | Negative |
| P51456 | FCLLQGQVTGRVTYEWMMEN  | Negative |
| P51456 | NVKICRNDFVRTAIEVCGHV  | Negative |
| P51456 | YEWMMENVKICRNDFVRTAI  | Negative |
| P51456 | LLGFCLLQGQVTGRVTYEW   | Negative |
| P51456 | LQGQVTGRVTYEWMMENVKI  | Negative |
| P51456 | LFYLLGFCLLQGQVTGRVTY  | Negative |
| P51456 | GFCLLQGQVTGRVTYEWMM   | Negative |
| P51456 | GRVTYEWMMENVKICRNDFV  | Negative |
| P51456 | QVTGRVTYEWMMENVKICRN  | Negative |
| P51456 | VTYEWMMENVKICRNDFVRT  | Negative |
| P51456 | YLLGFCLLQGQVTGRVTYEW  | Negative |
| P51456 | EWMMENVKICRNDFVRTAIE  | Negative |
| P51456 | QGQVTGRVTYEWMMENVKIC  | Negative |
| P51456 | LLFYLLGFCLLQGQVTGRVT  | Negative |
| P51456 | CLLQGQVTGRVTYEWMMENV  | Negative |
| P51456 | MPALLFYLLGFCLLQGQVTG  | Negative |
| P51456 | ENVKICRNDFVRTAIEVCGH  | Negative |
| P51456 | RVTYEWMMENVKICRNDFVR  | Negative |
| P51456 | LGFCCLLQGQVTGRVTYEWMM | Negative |
| P51456 | MENVKICRNDFVRTAIEVCG  | Negative |
| P51460 | MDPRLPAWALVLLGPALVFA  | Negative |
| P51460 | AWALVLLGPALVFALGPAPT  | Negative |
| P51460 | PAPTPEMREKLCGHHFVRAL  | Negative |
| P51460 | LGPALVFALGPAPTPEMREK  | Negative |
| P51460 | VFALGPAPTPEMREKLCGHH  | Negative |
| P51460 | MREKLCGHHFVRALVRVCGG  | Negative |
| P51460 | DPRLPAWALVLLGPALVFAL  | Negative |
| P51460 | LPAWALVLLGPALVFALGPA  | Negative |
| P51460 | APTPEMREKLCGHHFVRALV  | Negative |
| P51460 | ALGPAPTPEMREKLCGHHFV  | Negative |
| P51460 | LLGPALVFALGPAPTPEMRE  | Negative |
| P51460 | PTPEMREKLCGHHFVRALVR  | Negative |
| P51460 | EMREKLCGHHFVRALVRVCG  | Negative |
| P51460 | LGPAPTPEMREKLCGHHFVR  | Negative |
| P51460 | PRLPAWALVLLGPALVFALG  | Negative |
| P51460 | LVLLGPALVFALGPAPTPEM  | Negative |
| P51460 | ALVLLGPALVFALGPAPTPE  | Negative |
| P51460 | VLLGPALVFALGPAPTPEMR  | Negative |

|        |                      |          |
|--------|----------------------|----------|
| P51460 | GPALVFALGPAPTPEMREKL | Negative |
| P51460 | WALVLLGPALVFALGPAPT  | Negative |
| P51460 | PALVFALGPAPTPEMREKLC | Negative |
| P51460 | PEMREKLCGHHFVRALVRVC | Negative |
| P51460 | FALGPAPTPEMREKLCGHHF | Negative |
| P51460 | RLPAWALVLLGPALVFALGP | Negative |
| P51460 | GPAPTPEMREKLCGHHFVRA | Negative |
| P51460 | LVFALGPAPTPEMREKLCGH | Negative |
| P51460 | ALVFALGPAPTPEMREKLCG | Negative |
| P51460 | REKLCGHHFVRALVRVCGGP | Negative |
| P51460 | TPEMREKLCGHHFVRALVRV | Negative |
| P51529 | AVLGLLFALAGPSAGRAEAA | Negative |
| P51529 | GPSAGRAEAAAGGIHVSNGR | Negative |
| P51529 | AGPSAGRAEAAAGGIHVSNG | Negative |
| P51529 | SAGRAEAAAGGIHVSNGRVV | Negative |
| P51529 | LFALAGPSAGRAEAAAGGIH | Negative |
| P51529 | TLITTAGMAFAVLGLLFALA | Negative |
| P51529 | FAVLGLLFALAGPSAGRAEA | Negative |
| P51529 | MRNARSTLITTAGMAFAVLG | Negative |
| P51529 | VLGLLFALAGPSAGRAEAAA | Negative |
| P51529 | TTAGMAFAVLGLLFALAGPS | Negative |
| P51529 | RNARSTLITTAGMAFAVLGL | Negative |
| P51529 | RSTLITTAGMAFAVLGLLFA | Negative |
| P51529 | AGMAFAVLGLLFALAGPSAG | Negative |
| P51529 | ALAGPSAGRAEAAAGGIHVS | Negative |
| P51529 | LAGPSAGRAEAAAGGIHVS  | Negative |
| P51529 | GMAFAVLGLLFALAGPSAGR | Negative |
| P51529 | LITTAGMAFAVLGLLFALAG | Negative |
| P51529 | PSAGRAEAAAGGIHVSNGRV | Negative |
| P51529 | AGRAEAAAGGIHVSNGRVVE | Negative |
| P51529 | STLITTAGMAFAVLGLLFAL | Negative |
| P51529 | FALAGPSAGRAEAAAGGIHV | Negative |
| P51529 | NARSTLITTAGMAFAVLGLL | Negative |
| P51529 | LGLLFALAGPSAGRAEAAAG | Negative |
| P51529 | AFAVLGLLFALAGPSAGRAE | Negative |
| P51529 | TAGMAFAVLGLLFALAGPSA | Negative |
| P51529 | ARSTLITTAGMAFAVLGLLF | Negative |
| P51529 | ITTAGMAFAVLGLLFALAGP | Negative |
| P51529 | GLLFALAGPSAGRAEAAAGG | Negative |
| P51529 | MAFAVLGLLFALAGPSAGRA | Negative |
| P51688 | CCALLLVGLCRARPRNALL  | Negative |
| P51688 | ALLLLADDGGFESGAYNNSA | Negative |
| P51688 | ACCALLLVGLCRARPRNAL  | Negative |
| P51688 | CRARPRNALLLLADDGGFES | Negative |
| P51688 | LGLCRARPRNALLLLADDGG | Negative |
| P51688 | PRNALLLLADDGGFESGAYN | Negative |

|        |                      |          |
|--------|----------------------|----------|
| P51688 | ALLVLGLCRARPRNALLL   | Negative |
| P51688 | LVLGLCRARPRNALLLADD  | Negative |
| P51688 | RNALLLADDGGFESGAYNN  | Negative |
| P51688 | GLCRARPRNALLLADDGGF  | Negative |
| P51688 | ARPRNALLLADDGGFESGA  | Negative |
| P51688 | LLVLGLCRARPRNALLLAD  | Negative |
| P51688 | VLGLCRARPRNALLLADDG  | Negative |
| P51688 | LLADDGGFESGAYNNSAIAT | Negative |
| P51688 | CALLVLGLCRARPRNALLL  | Negative |
| P51688 | RPRNALLLADDGGFESGAY  | Negative |
| P51688 | VPACCALLLVLGLCRARPRN | Negative |
| P51688 | ADDGGFESGAYNNSAIATPH | Negative |
| P51688 | SCPVPACCALLLVLGLCRAR | Negative |
| P51688 | MSCPVPACCALLLVLGLCRA | Negative |
| P51688 | PVPACCALLLVLGLCRARPR | Negative |
| P51688 | LLLADDGGFESGAYNNSAI  | Negative |
| P51688 | LLLVLGLCRARPRNALLLA  | Negative |
| P51688 | LCRARPRNALLLADDGGFE  | Negative |
| P51688 | LLLADDGGFESGAYNNSAIA | Negative |
| P51688 | NALLLADDGGFESGAYNNS  | Negative |
| P51688 | RARPRNALLLADDGGFESG  | Negative |
| P51688 | LADDGGFESGAYNNSAIATP | Negative |
| P51688 | CPVPACCALLLVLGLCRARP | Negative |
| P51740 | NPAFWTQKAADALNVAKKLQ | Negative |
| P51740 | QGAWVLLLLGFRLQLSLSVI | Negative |
| P51740 | FRLQLSLSVIPVEEENPAFW | Negative |
| P51740 | AWVLLLLGFRLQLSLSVIPV | Negative |
| P51740 | RLQLSLSVIPVEEENPAFWT | Negative |
| P51740 | LSVIPVEEENPAFWTQKAAD | Negative |
| P51740 | MQGAWVLLLLGFRLQLSLSV | Negative |
| P51740 | EENPAFWTQKAADALNVAKK | Negative |
| P51740 | LQLSLSVIPVEEENPAFWTQ | Negative |
| P51740 | VLLLLGFRLQLSLSVIPVEE | Negative |
| P51740 | PAFWTQKAADALNVAKKLQP | Negative |
| P51740 | LSLSVIPVEEENPAFWTQKA | Negative |
| P51740 | LLGFRLQLSLSVIPVEEEN  | Negative |
| P51740 | AFWTQKAADALNVAKKLQPI | Negative |
| P51740 | VEEENPAFWTQKAADALNVA | Negative |
| P51740 | PVEEENPAFWTQKAADALNV | Negative |
| P51740 | SLSVIPVEEENPAFWTQKAA | Negative |
| P51740 | FWTQKAADALNVAKKLQPIQ | Negative |
| P51740 | ENPAFWTQKAADALNVAKKL | Negative |
| P51740 | IPVEEENPAFWTQKAADALN | Negative |
| P51740 | LLLLGFRLQLSLSVIPVEEE | Negative |
| P51740 | GFRLQLSLSVIPVEEENPAF | Negative |
| P51740 | GAWVLLLLGFRLQLSLSVIP | Negative |



|        |                       |          |
|--------|-----------------------|----------|
| P51740 | VIPVEEENPAFWTQKAADAL  | Negative |
| P51740 | SVIPVEEENPAFWTQKAADA  | Negative |
| P51740 | LLGFRLQLSLSVIPVEEENP  | Negative |
| P51740 | LGFRLLQLSLSVIPVEEENPA | Negative |
| P51740 | QLSLSVIPVEEENPAFWTQK  | Negative |
| P51740 | EEENPAFWTQKAADALNVAK  | Negative |
| P51752 | LILPFLSVGLLLGTTAHAAT  | Negative |
| P51752 | LGTTAHAATPLKTEQDKLSY  | Negative |
| P51752 | TTAHAATPLKTEQDKLSYSM  | Negative |
| P51752 | RLILPFLSVGLLLGTTAHAA  | Negative |
| P51752 | DKLSYSMGVMTGKAFRKHDI  | Negative |
| P51752 | QDKLSYSMGVMTGKAFRKHD  | Negative |
| P51752 | KRLILPFLSVGLLLGTTAHA  | Negative |
| P51752 | LLGTTAHAATPLKTEQDKLS  | Negative |
| P51752 | HAATPLKTEQDKLSYSMGVM  | Negative |
| P51752 | TEQDKLSYSMGVMTGKAFRK  | Negative |
| P51752 | AATPLKTEQDKLSYSMGVMT  | Negative |
| P51752 | GLLLGTTAHAATPLKTEQDK  | Negative |
| P51752 | MKRLILPFLSVGLLLGTTAH  | Negative |
| P51752 | LKTEQDKLSYSMGVMTGKAF  | Negative |
| P51752 | KTEQDKLSYSMGVMTGKAFR  | Negative |
| P51752 | TAHAATPLKTEQDKLSYSMG  | Negative |
| P51752 | GTTAHAATPLKTEQDKLSYS  | Negative |
| P51752 | ATPLKTEQDKLSYSMGVMTG  | Negative |
| P51752 | LPFLSVGLLLGTTAHAATPL  | Negative |
| P51752 | PLKTEQDKLSYSMGVMTGKA  | Negative |
| P51752 | EQDKLSYSMGVMTGKAFRKH  | Negative |
| P51752 | ILPFLSVGLLLGTTAHAATP  | Negative |
| P51752 | SVGLLLGTTAHAATPLKTEQ  | Negative |
| P51752 | VGLLLGTTAHAATPLKTEQD  | Negative |
| P51752 | LLLGTTAHAATPLKTEQDKL  | Negative |
| P51752 | FLSVGLLLGTTAHAATPLKT  | Negative |
| P51752 | TPLKTEQDKLSYSMGVMTGK  | Negative |
| P51752 | LSVGLLLGTTAHAATPLKTE  | Negative |
| P51752 | AHAATPLKTEQDKLSYSMGV  | Negative |
| P51868 | LSFSRAEEGLNFPTYDGKDR  | Negative |
| P51868 | LLVVGLYLLSFSRAEEGLNF  | Negative |
| P51868 | FSRAEEGLNFPTYDGKDRVV  | Negative |
| P51868 | GLYLLSFSRAEEGLNFPTYD  | Negative |
| P51868 | GLNFPTYDGKDRVVSLSEKN  | Negative |
| P51868 | RAEEGLNFPTYDGKDRVVSL  | Negative |
| P51868 | DGKDRVVSLSEKNLQVLKR   | Negative |
| P51868 | YLLSFSRAEEGLNFPTYDGK  | Negative |
| P51868 | EGLNFPTYDGKDRVVSLSEK  | Negative |
| P51868 | LVVGLYLLSFSRAEEGLNFP  | Negative |
| P51868 | MKRIYLLVVGLYLLSFSRAE  | Negative |

|        |                      |          |
|--------|----------------------|----------|
| P51868 | EEGLNFPTYDGKDRVVSLSE | Negative |
| P51868 | IYLLVVGLYLLSFSRAEEGL | Negative |
| P51868 | LYLLSFSRAEEGLNFPTYDG | Negative |
| P51868 | TYDGKDRVVSLSEKNLKQVL | Negative |
| P51868 | FPTYDGKDRVVSLSEKNLKQ | Negative |
| P51868 | KRIYLLVVGLYLLSFSRAEE | Negative |
| P51868 | SFSRAEEGLNFPTYDGKDRV | Negative |
| P51868 | NFPTYDGKDRVVSLSEKNLK | Negative |
| P51868 | SRAEEGLNFPTYDGKDRVVS | Negative |
| P51868 | VVGLYLLSFSRAEEGLNFPT | Negative |
| P51868 | LLSFSRAEEGLNFPTYDGKD | Negative |
| P51868 | LNPTYDGKDRVVSLSEKNL  | Negative |
| P51868 | GKDRVVSLSEKNLKQVLKRY | Negative |
| P51868 | AEEGLNFPTYDGKDRVVSLS | Negative |
| P51868 | YDGKDRVVSLSEKNLKQVLK | Negative |
| P51868 | VGLYLLSFSRAEEGLNFPTY | Negative |
| P51868 | PTYDGKDRVVSLSEKNLKQV | Negative |
| P51868 | RIYLLVVGLYLLSFSRAEEG | Negative |
| P51918 | LALWLLAGTVFPQGCCQHW  | Negative |
| P51918 | LSPGGKRDLDNFSDTLGNMV | Negative |
| P51918 | WSYGLSPGGKRDLDNFSDTL | Negative |
| P51918 | LAGTVFPQGCCQHWSYGLSP | Negative |
| P51918 | WLLAGTVFPQGCCQHWSYG  | Negative |
| P51918 | SPGGKRDLDNFSDTLGNMVE | Negative |
| P51918 | FPQGCCQHWSYGLSPGGKRD | Negative |
| P51918 | QGCCQHWSYGLSPGGKRDL  | Negative |
| P51918 | AAKILALWLLAGTVFPQGC  | Negative |
| P51918 | PQGCCQHWSYGLSPGGKRD  | Negative |
| P51918 | MAAKILALWLLAGTVFPQG  | Negative |
| P51918 | GCCQHWSYGLSPGGKRDLN  | Negative |
| P51918 | KILALWLLAGTVFPQGCCCQ | Negative |
| P51918 | CQHWSYGLSPGGKRDLNFS  | Negative |
| P51918 | LLAGTVFPQGCCQHWSYGL  | Negative |
| P51918 | GTVFPQGCCQHWSYGLSPGG | Negative |
| P51918 | AGTVFPQGCCQHWSYGLSPG | Negative |
| P51918 | AKILALWLLAGTVFPQGCCC | Negative |
| P51918 | CCQHWSYGLSPGGKRDLNFS | Negative |
| P51918 | YGLSPGGKRDLDNFSDTLGN | Negative |
| P51918 | HWSYGLSPGGKRDLDNFSDT | Negative |
| P51918 | ILALWLLAGTVFPQGCCCQH | Negative |
| P51918 | SYGLSPGGKRDLDNFSDTLG | Negative |
| P51918 | GLSPGGKRDLDNFSDTLGNM | Negative |
| P51918 | LLAGTVFPQGCCQHWSYGLS | Negative |
| P51918 | ALWLLAGTVFPQGCCCQHWS | Negative |
| P51918 | VFPQGCCQHWSYGLSPGGKR | Negative |
| P51918 | TVFPQGCCQHWSYGLSPGGK | Negative |

|        |                       |          |
|--------|-----------------------|----------|
| P51918 | QHWSYGLSPGGKRDLDNFSD  | Negative |
| P51919 | LWILLLLVVVMMMSQGCCQH  | Negative |
| P51919 | CCQHWSYGLSPGGKRDLDL   | Negative |
| P51919 | MMMSQGCCQHWSYGLSPGGK  | Negative |
| P51919 | PQTSNLWILLLLVVVMMMSQ  | Negative |
| P51919 | QGCCCQHWSYGLSPGGKRDLD | Negative |
| P51919 | GCCQHWSYGLSPGGKRDLD   | Negative |
| P51919 | LLVVVMMMSQGCCQHWSYGL  | Negative |
| P51919 | LVVVMMMSQGCCQHWSYGLS  | Negative |
| P51919 | CQHWSYGLSPGGKRDLDLS   | Negative |
| P51919 | QTSNLWILLLLVVVMMMSQG  | Negative |
| P51919 | NLWILLLLVVVMMMSQGCCQ  | Negative |
| P51919 | SYGLSPGGKRDLDLSDTLG   | Negative |
| P51919 | SQGCCQHWSYGLSPGGKRD   | Negative |
| P51919 | WSYGLSPGGKRDLDLSDTL   | Negative |
| P51919 | TSNLWILLLLVVVMMMSQGC  | Negative |
| P51919 | LLLVVVMMMSQGCCQHWSYG  | Negative |
| P51919 | YGLSPGGKRDLDLSDTLGN   | Negative |
| P51919 | VVMMMSQGCCQHWSYGLSPG  | Negative |
| P51919 | VMMMSQGCCQHWSYGLSPGG  | Negative |
| P51919 | ILLLLVVVMMMSQGCCQHWS  | Negative |
| P51919 | HWSYGLSPGGKRDLDLSDT   | Negative |
| P51919 | MAPQTSNLWILLLLVVVMMM  | Negative |
| P51919 | VVVMMMSQGCCQHWSYGLSP  | Negative |
| P51919 | MMSQGCCQHWSYGLSPGGKR  | Negative |
| P51919 | APQTSNLWILLLLVVVMMMS  | Negative |
| P51919 | WILLLLVVVMMMSQGCCQHW  | Negative |
| P51919 | SNLWILLLLVVVMMMSQGCC  | Negative |
| P51919 | MSQGCCQHWSYGLSPGGKRD  | Negative |
| P51919 | QHWSYGLSPGGKRDLDLSD   | Negative |
| P51925 | MCVSRLVLLLGLLLCVGAQL  | Negative |
| P51925 | VGAQLSNGQHWSHGWP      | Negative |
| P51925 | NGQHWSHGWP            | Negative |
| P51925 | SRLVLLLGLLLCVGAQLSNG  | Negative |
| P51925 | WYPGGKRELDSFGTSEISEE  | Negative |
| P51925 | WSHGWP                | Negative |
| P51925 | CVGAQLSNGQHWSHGWP     | Negative |
| P51925 | LSNGQHWSHGWP          | Negative |
| P51925 | GLLLCVGAQLSNGQHWSHG   | Negative |
| P51925 | RLVLLLGLLLCVGAQLSNGQ  | Negative |
| P51925 | SHGWP                 | Negative |
| P51925 | GAQLSNGQHWSHGWP       | Negative |
| P51925 | LGLLLCVGAQLSNGQHWSHG  | Negative |
| P51925 | LLLCVGAQLSNGQHWSHG    | Negative |
| P51925 | VSRLVLLLGLLLCVGAQLSN  | Negative |
| P51925 | LLCVGAQLSNGQHWSHGWP   | Negative |

|        |                       |          |
|--------|-----------------------|----------|
| P51925 | AQLSNGQHWSHGWYPGGKRE  | Negative |
| P51925 | LCVGAQLSNGQHWSHGWYPG  | Negative |
| P51925 | LVLLGLLLCVGAQLSNGQH   | Negative |
| P51925 | LLLGLLLCVGAQLSNGQHS   | Negative |
| P51925 | QLSNGQHWSHGWYPGGKREL  | Negative |
| P51925 | CVSRLVLLGLLLCVGAQLS   | Negative |
| P51925 | QHWSHGWYPGGKRELDSEFT  | Negative |
| P51925 | GWYPGGKRELDSEFTSEISE  | Negative |
| P51925 | SNGQHWSHGWYPGGKRELDSE | Negative |
| P51925 | GQHWSHGWYPGGKRELDSEFT | Negative |
| P51925 | HWSHGWYPGGKRELDSEFTS  | Negative |
| P51925 | HGWYPGGKRELDSEFTSEIS  | Negative |
| P51925 | VLLGLLLCVGAQLSNGQHW   | Negative |
| P52013 | VLAVALAQQDDAKGPKVTD   | Negative |
| P52013 | AVLAVALAQQDDAKGPKVT   | Negative |
| P52013 | LVVAVALAVALAQQDDAKG   | Negative |
| P52013 | KGPKVTDKVYFDMEIGGKPI  | Negative |
| P52013 | VGALAQQDDAKGPKVTDKVY  | Negative |
| P52013 | LLVVAVALAVALAQQDDAK   | Negative |
| P52013 | LAQQDDAKGPKVTDKVYFDM  | Negative |
| P52013 | VTDKVYFDMEIGGKPIGRIV  | Negative |
| P52013 | QQDDAKGPKVTDKVYFDMEI  | Negative |
| P52013 | VVAVALAVALAQQDDAKGP   | Negative |
| P52013 | GALAQQDDAKGPKVTDKVYF  | Negative |
| P52013 | KVTDKVYFDMEIGGKPIGRI  | Negative |
| P52013 | TDKVYFDMEIGGKPIGRIVI  | Negative |
| P52013 | GPKVTDKVYFDMEIGGKPIG  | Negative |
| P52013 | GDDAKGPKVTDKVYFDMEIG  | Negative |
| P52013 | AKGPKVTDKVYFDMEIGGKP  | Negative |
| P52013 | DKVYFDMEIGGKPIGRIVIG  | Negative |
| P52013 | SLLVVAVALAVALAQQDDA   | Negative |
| P52013 | DDAKGPKVTDKVYFDMEIGG  | Negative |
| P52013 | KVYFDMEIGGKPIGRIVIGL  | Negative |
| P52013 | PKVTDKVYFDMEIGGKPIGR  | Negative |
| P52013 | AQQDDAKGPKVTDKVYFDME  | Negative |
| P52013 | VAAVALAVALAQQDDAKGPK  | Negative |
| P52013 | AVGALAQQDDAKGPKVTDKV  | Negative |
| P52013 | DAKGPKVTDKVYFDMEIGGK  | Negative |
| P52013 | ALAQQDDAKGPKVTDKVYFD  | Negative |
| P52013 | MKSLLVVAVALAVALAQQD   | Negative |
| P52013 | LAVGALAQQDDAKGPKVTDK  | Negative |
| P52013 | KSLLVVAVALAVALAQQDD   | Negative |
| P52193 | DPTVYFKEQFLDGDGWTERW  | Negative |
| P52193 | LGLLGLAAADPTVYFKEQFL  | Negative |
| P52193 | PTVYFKEQFLDGDGWTERWI  | Negative |
| P52193 | GLAAADPTVYFKEQFLDGDG  | Negative |

|        |                      |          |
|--------|----------------------|----------|
| P52193 | PVPLLLGLLGLAAADPTVYF | Negative |
| P52193 | FKEQFLDGDGWTERWIESKH | Negative |
| P52193 | QFLDGDGWTERWIESKHKPD | Negative |
| P52193 | PLLLGLLGLAAADPTVYFKE | Negative |
| P52193 | AADPTVYFKEQFLDGDGWTE | Negative |
| P52193 | VYFKEQFLDGDGWTERWIES | Negative |
| P52193 | LDGDGWTERWIESKHKPDFG | Negative |
| P52193 | LGLAAADPTVYFKEQFLDGD | Negative |
| P52193 | ADPTVYFKEQFLDGDGWTER | Negative |
| P52193 | LAAADPTVYFKEQFLDGDGW | Negative |
| P52193 | EQFLDGDGWTERWIESKHKP | Negative |
| P52193 | LLGLAAADPTVYFKEQFLDG | Negative |
| P52193 | DGDGWTERWIESKHKPDFGK | Negative |
| P52193 | GLLGLAAADPTVYFKEQFLD | Negative |
| P52193 | MLLPVPLLLGLLGLAAADPT | Negative |
| P52193 | TVYFKEQFLDGDGWTERWIE | Negative |
| P52193 | LLGLLGLAAADPTVYFKEQF | Negative |
| P52193 | VPLLLGLLGLAAADPTVYFK | Negative |
| P52193 | LLPVPLLLGLLGLAAADPTV | Negative |
| P52193 | YFKEQFLDGDGWTERWIESK | Negative |
| P52193 | FLDGDGWTERWIESKHKPDF | Negative |
| P52193 | GDGWTERWIESKHKPDFGKF | Negative |
| P52193 | LLLGLLGLAAADPTVYFKEQ | Negative |
| P52193 | KEQFLDGDGWTERWIESKHK | Negative |
| P52193 | AAADPTVYFKEQFLDGDGWT | Negative |
| P52663 | SQANTKGIDEIKNLETDFNG | Negative |
| P52663 | CLISISFFSQANTKGIDEIK | Negative |
| P52663 | QANTKGIDEIKNLETDFNGR | Negative |
| P52663 | VKQSRIAILFSSCLISISFF | Negative |
| P52663 | FSQANTKGIDEIKNLETDFN | Negative |
| P52663 | NVKQSRIAILFSSCLISISF | Negative |
| P52663 | SRIAILFSSCLISISFFSQA | Negative |
| P52663 | LISISFFSQANTKGIDEIKN | Negative |
| P52663 | FFSQANTKGIDEIKNLETDF | Negative |
| P52663 | SFFSQANTKGIDEIKNLETD | Negative |
| P52663 | TKGIDEIKNLETDFNGRIGV | Negative |
| P52663 | SCLISISFFSQANTKGIDEI | Negative |
| P52663 | SLNVKQSRIAILFSSCLISI | Negative |
| P52663 | IAILFSSCLISISFFSQANT | Negative |
| P52663 | QSRIAILFSSCLISISFFSQ | Negative |
| P52663 | NTKGIDEIKNLETDFNGRIG | Negative |
| P52663 | ILFSSCLISISFFSQANTKG | Negative |
| P52663 | FSSCLISISFFSQANTKGID | Negative |
| P52663 | SSCLISISFFSQANTKGIDE | Negative |
| P52663 | MSLNVKQSRIAILFSSCLIS | Negative |
| P52663 | AILFSSCLISISFFSQANTK | Negative |

|        |                      |          |
|--------|----------------------|----------|
| P52663 | ANTKGIDEIKNLETDFNGRI | Negative |
| P52663 | RIAILFSSCLISISFFSQAN | Negative |
| P52663 | ISISFFSQANTKGIDEIKNL | Negative |
| P52663 | KQSRIAILFSSCLISISFFS | Negative |
| P52663 | LNVKQSRIAILFSSCLISIS | Negative |
| P52663 | SISFFSQANTKGIDEIKNLE | Negative |
| P52663 | KGIDEIKNLETDFNGRIGVY | Negative |
| P52663 | ISFFSQANTKGIDEIKNLET | Negative |
| P52682 | LALSAFNAHANKSDAAAKQI | Negative |
| P52682 | ASFLFSVCLALSAFNAHANK | Negative |
| P52682 | KSDAAAKQIKKLEEDFDGRI | Negative |
| P52682 | AHANKSDAAAKQIKKLEEDF | Negative |
| P52682 | CLALSAFNAHANKSDAAAKQ | Negative |
| P52682 | SFLFSVCLALSAFNAHANKS | Negative |
| P52682 | FLFSVCLALSAFNAHANKSD | Negative |
| P52682 | NAHANKSDAAAKQIKKLEED | Negative |
| P52682 | SAFNAHANKSDAAAKQIKKL | Negative |
| P52682 | MSNKVNFKTASFLFSVCLAL | Negative |
| P52682 | VNFKTASFLFSVCLALSAFN | Negative |
| P52682 | NKSDAAAKQIKKLEEDFDGR | Negative |
| P52682 | SDAAAKQIKKLEEDFDGRIG | Negative |
| P52682 | NFKTASFLFSVCLALSAFNA | Negative |
| P52682 | ANKSDAAAKQIKKLEEDFDG | Negative |
| P52682 | KTASFLFSVCLALSAFNAHA | Negative |
| P52682 | KVNFKTASFLFSVCLALSAF | Negative |
| P52682 | AFNAHANKSDAAAKQIKKLE | Negative |
| P52682 | TASFLFSVCLALSAFNAHAN | Negative |
| P52682 | NKVNFKTASFLFSVCLALSA | Negative |
| P52682 | LSAFNAHANKSDAAAKQIKK | Negative |
| P52682 | SNKVNFKTASFLFSVCLALS | Negative |
| P52682 | SVCLALSAFNAHANKSDAAA | Negative |
| P52682 | VCLALSAFNAHANKSDAAAK | Negative |
| P52682 | FKTASFLFSVCLALSAFNAH | Negative |
| P52682 | ALSAFNAHANKSDAAAKQIK | Negative |
| P52682 | FSVCLALSAFNAHANKSDAA | Negative |
| P52682 | FNAHANKSDAAAKQIKKLEE | Negative |
| P52682 | HANKSDAAAKQIKKLEEDFD | Negative |
| P52699 | TAAESLPDLKIEKLDEGVYV | Negative |
| P52699 | PDLKIEKLDEGVYVHTSFEE | Negative |
| P52699 | VFFIFLFCSIATAAESLPDL | Negative |
| P52699 | KLDEGVYVHTSFEEVNGWGV | Negative |
| P52699 | DLKIEKLDEGVYVHTSFEEV | Negative |
| P52699 | FIFLFCSIATAAESLPDLKI | Negative |
| P52699 | LPDLKIEKLDEGVYVHTSFE | Negative |
| P52699 | IEKLDEGVYVHTSFEEVNGW | Negative |
| P52699 | FFIFLFCSIATAAESLPDLK | Negative |

|        |                      |          |
|--------|----------------------|----------|
| P52699 | AESLPDLKIEKLDEGVYVHT | Negative |
| P52699 | FLFCSIATAAESLPDLKIEK | Negative |
| P52699 | SLPDLKIEKLDEGVYVHTSF | Negative |
| P52699 | SKLSVFFIFLFCSIATAAES | Negative |
| P52699 | EKLDEGVYVHTSFEEVNGWG | Negative |
| P52699 | LFCSIATAAESLPDLKIEKL | Negative |
| P52699 | ESLPDLKIEKLDEGVYVHTS | Negative |
| P52699 | IATAAESLPDLKIEKLDEGV | Negative |
| P52699 | KLSVFFIFLFCSIATAAESL | Negative |
| P52699 | CSIATAAESLPDLKIEKLDE | Negative |
| P52699 | AAESLPDLKIEKLDEGVYVH | Negative |
| P52699 | ATAAESLPDLKIEKLDEGVY | Negative |
| P52699 | SVFFIFLFCSIATAAESLPD | Negative |
| P52699 | FCSIATAAESLPDLKIEKLD | Negative |
| P52699 | MSKLSVFFIFLFCSIATAAE | Negative |
| P52699 | LDEGVYVHTSFEEVNGWGVV | Negative |
| P52699 | IFLFCSIATAAESLPDLKIE | Negative |
| P52699 | KIEKLDEGVYVHTSFEEVNG | Negative |
| P52699 | LKIEKLDEGVYVHTSFEEVN | Negative |
| P52699 | SIATAAESLPDLKIEKLDEG | Negative |
| P52706 | LATTSNHDFSYLRFAYDATD | Negative |
| P52706 | LVLHLFVLLLQYSEVHSLAT | Negative |
| P52706 | SEVHSLATTSNHDFSYLRF  | Negative |
| P52706 | LLVLHLFVLLLQYSEVHSLA | Negative |
| P52706 | SAILLVLHLFVLLLQYSEVH | Negative |
| P52706 | HSLATTSNHDFSYLRFAYDA | Negative |
| P52706 | EVHSLATTSNHDFSYLRFAY | Negative |
| P52706 | LLLQYSEVHSLATTSNHDFS | Negative |
| P52706 | LLQYSEVHSLATTSNHDFS  | Negative |
| P52706 | TTSNHDFSYLRFAYDATDLE | Negative |
| P52706 | SLATTSNHDFSYLRFAYDAT | Negative |
| P52706 | AILLVLHLFVLLLQYSEVHS | Negative |
| P52706 | FVLLLQYSEVHSLATTSNHD | Negative |
| P52706 | HLFVLLLQYSEVHSLATTSN | Negative |
| P52706 | LQYSEVHSLATTSNHDFS   | Negative |
| P52706 | ATTSNHDFSYLRFAYDATDL | Negative |
| P52706 | TMSAILLVLHLFVLLLQYSE | Negative |
| P52706 | EKSTMSAILLVLHLFVLLLQ | Negative |
| P52706 | VLLLQYSEVHSLATTSNHDF | Negative |
| P52706 | LFVLLLQYSEVHSLATTSNH | Negative |
| P52706 | MSAILLVLHLFVLLLQYSEV | Negative |
| P52706 | MEKSTMSAILLVLHLFVLLL | Negative |
| P52706 | VLHLFVLLLQYSEVHSLATT | Negative |
| P52706 | QYSEVHSLATTSNHDFS    | Negative |
| P52706 | ILLVLHLFVLLLQYSEVHSL | Negative |
| P52706 | KSTMSAILLVLHLFVLLLQY | Negative |

|        |                      |          |
|--------|----------------------|----------|
| P52706 | VHSLATTSNHDFSYLRFAYD | Negative |
| P52706 | STMSAILLVLHLFVLLQYS  | Negative |
| P52706 | YSEVHSLATTSNHDFSYLRF | Negative |
| P52753 | GGSGSGSGSGSGSGSGSGGS | Negative |
| P52753 | FSIIAISFLASLAMASPAKR | Negative |
| P52753 | PAKRGGGGGGSGSGSGSGSG | Negative |
| P52753 | AKRGGGGGGSGSGSGSGSGS | Negative |
| P52753 | LASLAMASPAKRGGGGGGSG | Negative |
| P52753 | ASPAKRGGGGGGSGSGSGSG | Negative |
| P52753 | AISFLASLAMASPAKRGGGG | Negative |
| P52753 | ASLAMASPAKRGGGGGGSGS | Negative |
| P52753 | MQFSIIAISFLASLAMASPA | Negative |
| P52753 | LAMASPAKRGGGGGGSGSGS | Negative |
| P52753 | GGSGSGSGSGSGSGSGGGST | Negative |
| P52753 | KRGGGGGGSGSGSGSGSGSG | Negative |
| P52753 | SGSGSGSGSGSGSGGGSTTY | Negative |
| P52753 | SIIAISFLASLAMASPAKRG | Negative |
| P52753 | IIAISFLASLAMASPAKRGG | Negative |
| P52753 | MASPAKRGGGGGGSGSGSGS | Negative |
| P52753 | GSGSGSGSGSGSGGGSTTYT | Negative |
| P52753 | AMASPAKRGGGGGGSGSGSG | Negative |
| P52753 | QFSIIAISFLASLAMASPAK | Negative |
| P52753 | SPAKRGGGGGGSGSGSGSGS | Negative |
| P52753 | GSGSGSGSGSGSGSGGGSTT | Negative |
| P52753 | SLAMASPAKRGGGGGGSGSG | Negative |
| P52753 | FLASLAMASPAKRGGGGGGS | Negative |
| P52753 | SFLASLAMASPAKRGGGGGG | Negative |
| P52753 | IAISFLASLAMASPAKRGGG | Negative |
| P52753 | GGGGSGSGSGSGSGSGSGGG | Negative |
| P52753 | GGGGGGSGSGSGSGSGSGSG | Negative |
| P52753 | GGGGGGSGSGSGSGSGSGSG | Negative |
| P52753 | RGGGGGGSGSGSGSGSGSGS | Negative |
| P52798 | GSSLRHVVYWNSSNPRLRG  | Negative |
| P52798 | LRGGSSLRHVVYWNSSNPRL | Negative |
| P52798 | LRHVYWNSSNPRLRGDAV   | Negative |
| P52798 | GGSSLRHVVYWNSSNPRLLR | Negative |
| P52798 | PLLRTVLWAAFLGSPLRGG  | Negative |
| P52798 | LPLLRTVLWAAFLGSPLRGG | Negative |
| P52798 | VLWAAFLGSPLRGGSSLRHV | Negative |
| P52798 | AAFLGSPLRGGSSLRHVVYW | Negative |
| P52798 | SPLRGGSSLRHVVYWNSSNP | Negative |
| P52798 | TVLWAAFLGSPLRGGSSLRH | Negative |
| P52798 | RHVYWNSSNPRLLRGDAVV  | Negative |
| P52798 | PLRGGSSLRHVVYWNSSNPR | Negative |
| P52798 | LGSPLRGGSSLRHVVYWNSS | Negative |
| P52798 | RTVLWAAFLGSPLRGGSSLR | Negative |



|        |                       |          |
|--------|-----------------------|----------|
| P52798 | SSLRHVVYWNSSNPRLLRGD  | Negative |
| P52798 | AFLGSPLRGGSSLRHVYWN   | Negative |
| P52798 | VVYWNSSNPRLLRGDVVEL   | Negative |
| P52798 | LRTVLWAAFLGSPLRGGSS   | Negative |
| P52798 | RGGSSLRHVYWNSSNPRL    | Negative |
| P52798 | MRLPLLRTVLWAAFLGSPL   | Negative |
| P52798 | HVVYWNSSNPRLLRGDVVE   | Negative |
| P52798 | LLRTVLWAAFLGSPLRGGSS  | Negative |
| P52798 | FLGSPLRGGSSLRHVYWNS   | Negative |
| P52798 | VYWNSSNPRLLRGDVVELG   | Negative |
| P52798 | LLPLLRTVLWAAFLGSPLRG  | Negative |
| P52798 | WAAFLGSPLRGGSSLRHVY   | Negative |
| P52798 | GSPLRGGSSLRHVYWNSSN   | Negative |
| P52798 | RLLPLLRTVLWAAFLGSPLR  | Negative |
| P52798 | SLRHVVYWNSSNPRLLRGDA  | Negative |
| P52823 | VLVISASATHEAEQNDSVSP  | Negative |
| P52823 | LVLVISASATHEAEQNDSVS  | Negative |
| P52823 | LLVLVISASATHEAEQNDSV  | Negative |
| P52823 | MLQNSAVLLVLVISASATHE  | Negative |
| P52823 | EAEQNDSVSPRKSrvAAQNS  | Negative |
| P52823 | LQNSAVLLVLVISASATHEA  | Negative |
| P52823 | RKSRVAAQNSAEVVRCLNSA  | Negative |
| P52823 | SATHEAEQNDSVSPRKSrvA  | Negative |
| P52823 | AEQNDSVSPRKSrvAAQNSA  | Negative |
| P52823 | NSAVLLVLVISASATHEAEQ  | Negative |
| P52823 | VSPRKSrvAAQNSAEVVRCL  | Negative |
| P52823 | DSVSPRKSrvAAQNSAEVVR  | Negative |
| P52823 | SVSPRKSrvAAQNSAEVVR   | Negative |
| P52823 | THEAEQNDSVSPRKSrvAAQ  | Negative |
| P52823 | VLLVLVISASATHEAEQNDS  | Negative |
| P52823 | ISASATHEAEQNDSVSPRKS  | Negative |
| P52823 | NDSVSPRKSrvAAQNSAEVV  | Negative |
| P52823 | QNDSVSPRKSrvAAQNSAEV  | Negative |
| P52823 | VISASATHEAEQNDSVSPRK  | Negative |
| P52823 | HEAEQNDSVSPRKSrvAAQN  | Negative |
| P52823 | PRKSrvAAQNSAEVVRCLNS  | Negative |
| P52823 | ASATHEAEQNDSVSPRKSrv  | Negative |
| P52823 | AVLLVLVISASATHEAEQND  | Negative |
| P52823 | EQNDSVSPRKSrvAAQNSAE  | Negative |
| P52823 | LVISASATHEAEQNDSVSPR  | Negative |
| P52823 | SPRKSrvAAQNSAEVVRCLN  | Negative |
| P52823 | ATHEAEQNDSVSPRKSrvAA  | Negative |
| P52823 | SASATHEAEQNDSVSPRKSrv | Negative |
| P52823 | SAVLLVLVISASATHEAEQN  | Negative |
| P53366 | VPVALMYLGLAFLGADTAR   | Negative |
| P53366 | TARLDVAAEFRKKWNKWALS  | Negative |

|        |                      |          |
|--------|----------------------|----------|
| P53366 | LGSLAFLGADTARLDVAAEF | Negative |
| P53366 | YLGSLAFLGADTARLDVAAE | Negative |
| P53366 | EFRKKWNKWALSRGKRELRL | Negative |
| P53366 | KLVPVALMYLGSLAFLGADT | Negative |
| P53366 | LAFLGADTARLDVAAEFRKK | Negative |
| P53366 | LMYLGSLAFLGADTARLDVA | Negative |
| P53366 | DTARLDVAAEFRKKWNKWAL | Negative |
| P53366 | VALMYLGSLAFLGADTARLD | Negative |
| P53366 | RLDVAAEFRKKWNKWALSRG | Negative |
| P53366 | VAAEFRKKWNKWALSRGKRE | Negative |
| P53366 | GADTARLDVAAEFRKKWNKW | Negative |
| P53366 | MKLVPVALMYLGSLAFLGAD | Negative |
| P53366 | FLGADTARLDVAAEFRKKWN | Negative |
| P53366 | LGADTARLDVAAEFRKKWNK | Negative |
| P53366 | GSLAFLGADTARLDVAAEFR | Negative |
| P53366 | AAEFRKKWNKWALSRGKREL | Negative |
| P53366 | ARLDVAAEFRKKWNKWALSR | Negative |
| P53366 | FRKKWNKWALSRGKRELRLS | Negative |
| P53366 | SLAFLGADTARLDVAAEFRK | Negative |
| P53366 | AEFRKKWNKWALSRGKREL  | Negative |
| P53366 | DVAAEFRKKWNKWALSRGKR | Negative |
| P53366 | ADTARLDVAAEFRKKWNKWA | Negative |
| P53366 | AFLGADTARLDVAAEFRKKW | Negative |
| P53366 | PVALMYLGSLAFLGADTARL | Negative |
| P53366 | LDVAAEFRKKWNKWALSRGK | Negative |
| P53366 | MYLGSLAFLGADTARLDVAA | Negative |
| P53366 | LVPVALMYLGSLAFLGADTA | Negative |
| P53543 | FFFMNFFSPAQSYLLTHCEP | Negative |
| P53543 | SYFLLFFFMNFFSPAQSYLL | Negative |
| P53543 | CEPVNETVSVEKDGCPCCLA | Negative |
| P53543 | FFSPAQSYLLTHCEPVNETV | Negative |
| P53543 | SSYFLLFFFMNFFSPAQSYL | Negative |
| P53543 | MPASSYFLLFFFMNFFSPAQ | Negative |
| P53543 | LLTHCEPVNETVSVEKDGCP | Negative |
| P53543 | VNETVSVEKDGCPCCLAFQT | Negative |
| P53543 | HCEPVNETVSVEKDGCPCCL | Negative |
| P53543 | YFLLFFFMNFFSPAQSYLLT | Negative |
| P53543 | THCEPVNETVSVEKDGCPC  | Negative |
| P53543 | FMNFFSPAQSYLLTHCEPVN | Negative |
| P53543 | MNFFSPAQSYLLTHCEPVNE | Negative |
| P53543 | LTHCEPVNETVSVEKDGCPC | Negative |
| P53543 | AQSYLLTHCEPVNETVSVEK | Negative |
| P53543 | PAQSYLLTHCEPVNETVSVE | Negative |
| P53543 | PVNETVSVEKDGCPCCLAFQ | Negative |
| P53543 | YLLTHCEPVNETVSVEKDGC | Negative |
| P53543 | LFFFMNFFSPAQSYLLTHCE | Negative |

|        |                      |          |
|--------|----------------------|----------|
| P53543 | FFMNFFSPAQSYLLTHCEPV | Negative |
| P53543 | ASSYFLLFFFMNFFSPAQSY | Negative |
| P53543 | FSPAQSYLLTHCEPVNETVS | Negative |
| P53543 | NFFSPAQSYLLTHCEPVNET | Negative |
| P53543 | SYLLTHCEPVNETVSVEKDG | Negative |
| P53543 | LLFFFMNFFSPAQSYLLTHC | Negative |
| P53543 | QSYLLTHCEPVNETVSVEKD | Negative |
| P53543 | EPVNETVSVEKDGCPCCLAF | Negative |
| P53543 | SPAQSYLLTHCEPVNETVSV | Negative |
| P53543 | PASSYFLLFFFMNFFSPAQS | Negative |
| P53616 | SLIGYSTIVSALPYAADIDT | Negative |
| P53616 | IGYSTIVSALPYAADIDTGC | Negative |
| P53616 | LSATTLTAASLIGYSTIVSA | Negative |
| P53616 | TAASLIGYSTIVSALPYAAD | Negative |
| P53616 | MKLSATTLTAASLIGYSTIV | Negative |
| P53616 | KLSATTLTAASLIGYSTIVS | Negative |
| P53616 | DTGCTTTAHGSHQHKRAVAV | Negative |
| P53616 | SATTLTAASLIGYSTIVSAL | Negative |
| P53616 | ATTLTAASLIGYSTIVSALP | Negative |
| P53616 | DIDTGCTTTAHGSHQHKRAV | Negative |
| P53616 | TTLTAASLIGYSTIVSALPY | Negative |
| P53616 | ASLIGYSTIVSALPYAADID | Negative |
| P53616 | PYAADIDTGCTTTAHGSHQH | Negative |
| P53616 | TIVSALPYAADIDTGCTTTA | Negative |
| P53616 | IDTGCTTTAHGSHQHKRAVA | Negative |
| P53616 | YAADIDTGCTTTAHGSHQHK | Negative |
| P53616 | LIGYSTIVSALPYAADIDTG | Negative |
| P53616 | YSTIVSALPYAADIDTGCTT | Negative |
| P53616 | LTAASLIGYSTIVSALPYAA | Negative |
| P53616 | STIVSALPYAADIDTGCTTT | Negative |
| P53616 | GYSTIVSALPYAADIDTGCT | Negative |
| P53616 | SALPYAADIDTGCTTTAHGS | Negative |
| P53616 | VSALPYAADIDTGCTTTAHG | Negative |
| P53616 | ALPYAADIDTGCTTTAHGSH | Negative |
| P53616 | TLTAASLIGYSTIVSALPYA | Negative |
| P53616 | LPYAADIDTGCTTTAHGSHQ | Negative |
| P53616 | AADIDTGCTTTAHGSHQHKR | Negative |
| P53616 | ADIDTGCTTTAHGSHQHKRA | Negative |
| P53616 | IVSALPYAADIDTGCTTTAH | Negative |
| P53634 | LLSGDGAVRCDTPANCTYL  | Negative |
| P53634 | CDTPANCTYLDLLGTWVFQV | Negative |
| P53634 | CTYLDLLGTWVFQVGSSGSQ | Negative |
| P53634 | DGAVRCDTPANCTYLDLLGT | Negative |
| P53634 | LLLLSGDGAVRCDTPANCT  | Negative |
| P53634 | LLLLSGDGAVRCDTPANCTY | Negative |
| P53634 | PANCTYLDLLGTWVFQVGSS | Negative |

|        |                       |          |
|--------|-----------------------|----------|
| P53634 | MGAGPSLLLAALLLLLSGDG  | Negative |
| P53634 | AVRCDTPANCTYLDLLGTWV  | Negative |
| P53634 | GDGAVRCDTPANCTYLDLLG  | Negative |
| P53634 | SLLLAALLLLLSGDGAVRCD  | Negative |
| P53634 | ANCTYLDLLGTWVFQVGSSG  | Negative |
| P53634 | VRCDDTPANCTYLDLLGTWVF | Negative |
| P53634 | ALLLLLSGDGAVRCDTPANC  | Negative |
| P53634 | GAGPSLLLAALLLLLSGDGA  | Negative |
| P53634 | TPANCTYLDLLGTWVFQVGS  | Negative |
| P53634 | LAALLLLLSGDGAVRCDTPA  | Negative |
| P53634 | LLLAALLLLLSGDGAVRCDT  | Negative |
| P53634 | SGDGAVRCDTPANCTYLDLL  | Negative |
| P53634 | RCDTPANCTYLDLLGTWVFQ  | Negative |
| P53634 | AGPSLLLAALLLLLSGDGAV  | Negative |
| P53634 | LLSGDGAVRCDTPANCTYLD  | Negative |
| P53634 | LSGDGAVRCDTPANCTYLDL  | Negative |
| P53634 | GPSLLLAALLLLLSGDGAVR  | Negative |
| P53634 | DTPANCTYLDLLGTWVFQVG  | Negative |
| P53634 | PSLLLAALLLLLSGDGAVRC  | Negative |
| P53634 | NCTYLDLLGTWVFQVGSSGS  | Negative |
| P53634 | LLAALLLLLSGDGAVRCDTP  | Negative |
| P53634 | GAVRCDTPANCTYLDLLGTW  | Negative |
| P54107 | EIKHLLFLVAAACLLPMLSM  | Negative |
| P54107 | KKKSARDQFNKLVTDLPNVQ  | Negative |
| P54107 | VAAACLLPMLSMKKKSARDQ  | Negative |
| P54107 | MLSMKKKSARDQFNKLVTDL  | Negative |
| P54107 | PMLSMKKKSARDQFNKLVTD  | Negative |
| P54107 | MEIKHLLFLVAAACLLPMLS  | Negative |
| P54107 | LLPMLSMKKKSARDQFNKLVT | Negative |
| P54107 | LSMKKKKSARDQFNKLVTDL  | Negative |
| P54107 | LLFLVAAACLLPMLSMKKKS  | Negative |
| P54107 | KKKSARDQFNKLVTDLPNVQE | Negative |
| P54107 | QFNKLVTDLPNVQEEIVNIH  | Negative |
| P54107 | AAACLLPMLSMKKKSARDQF  | Negative |
| P54107 | RDQFNKLVTDLPNVQEEIVN  | Negative |
| P54107 | SMKKKSARDQFNKLVTDLPN  | Negative |
| P54107 | MKKKSARDQFNKLVTDLPNV  | Negative |
| P54107 | KHLLFLVAAACLLPMLSMKK  | Negative |
| P54107 | LPMLSMKKKSARDQFNKLVT  | Negative |
| P54107 | IKHLLFLVAAACLLPMLSMK  | Negative |
| P54107 | DQFNKLVTDLPNVQEEIVNI  | Negative |
| P54107 | CLLPMLSMKKKSARDQFNKL  | Negative |
| P54107 | LVAAACLLPMLSMKKKSARD  | Negative |
| P54107 | ACLLPMLSMKKKSARDQFNK  | Negative |
| P54107 | FLVAAACLLPMLSMKKKSAR  | Negative |
| P54107 | ARDQFNKLVTDLPNVQEEIV  | Negative |

|        |                       |          |
|--------|-----------------------|----------|
| P54107 | FNKLVTDLPNVQEEIVNIHN  | Negative |
| P54107 | SARDQFNKLVTDLPNVQEEI  | Negative |
| P54107 | HLLFLVAAACLLPMLSMKKK  | Negative |
| P54107 | KSARDQFNKLVTDLPNVQEE  | Negative |
| P54107 | AACLLPMLSMKKKSARDQFN  | Negative |
| P54318 | TVGGKEVCYGHLCFSNDKP   | Negative |
| P54318 | CFSNDKPWAGMLQRPLKIFP  | Negative |
| P54318 | MLLCWIVSLLLATVGGKEVC  | Negative |
| P54318 | GHLGCFSNDKPWAGMLQRPL  | Negative |
| P54318 | LATVGGKEVCYGHLCFSND   | Negative |
| P54318 | SNDKPWAGMLQRPLKIFPWS  | Negative |
| P54318 | LCWIVSLLLATVGGKEVCYG  | Negative |
| P54318 | SLLLATVGGKEVCYGHLCF   | Negative |
| P54318 | VSLLLATVGGKEVCYGHLC   | Negative |
| P54318 | GGKEVCYGHLCFSNDKPWA   | Negative |
| P54318 | IVSLLLATVGGKEVCYHGLG  | Negative |
| P54318 | KEVCYGHLCFSNDKPWAGM   | Negative |
| P54318 | FSNDKPWAGMLQRPLKIFPW  | Negative |
| P54318 | WIVSLLLATVGGKEVCYGHL  | Negative |
| P54318 | LLLATVGGKEVCYGHLCFS   | Negative |
| P54318 | CWIVSLLLATVGGKEVCYGH  | Negative |
| P54318 | VCYGHLCFSNDKPWAGMLQ   | Negative |
| P54318 | EVCYGHLCFSNDKPWAGML   | Negative |
| P54318 | GKEVCYGHLCFSNDKPWAG   | Negative |
| P54318 | LGCFSNDKPWAGMLQRPLKI  | Negative |
| P54318 | VGGKEVCYGHLCFSNDKPW   | Negative |
| P54318 | HLGCFSNDKPWAGMLQRPLK  | Negative |
| P54318 | CYGHLCFSNDKPWAGMLQR   | Negative |
| P54318 | GCFSDNDKPWAGMLQRPLKIF | Negative |
| P54318 | ATVGGKEVCYGHLCFSNDK   | Negative |
| P54318 | YGHLCFSNDKPWAGMLQRP   | Negative |
| P54318 | DKPWAGMLQRPLKIFPWSPE  | Negative |
| P54318 | NDKPWAGMLQRPLKIFPWS   | Negative |
| P54318 | LLATVGGKEVCYGHLCFSN   | Negative |
| P54421 | AQSIKVKKGDTLWDLSRKYD  | Negative |
| P54421 | ASAQSIKVKKGDTLWDLSRK  | Negative |
| P54421 | IITATTAVVLGSTLFAGAAS  | Negative |
| P54421 | ITATTAVVLGSTLFAGAASA  | Negative |
| P54421 | VKKGDTLWDLSRKYDTTISK  | Negative |
| P54421 | VLGSTLFAGAASAQSIKVKK  | Negative |
| P54421 | TATTAVVLGSTLFAGAASAQ  | Negative |
| P54421 | TAVVLGSTLFAGAASAQSIK  | Negative |
| P54421 | TLFAGAASAQSIKVKKGDTL  | Negative |
| P54421 | KQIITATTAVVLGSTLFAGA  | Negative |
| P54421 | QSIKVKKGDTLWDLSRKYDT  | Negative |
| P54421 | LFAGAASAQSIKVKKGDTLW  | Negative |

|        |                       |          |
|--------|-----------------------|----------|
| P54421 | MKKQIITATTAVVLGSTLFA  | Negative |
| P54421 | STLFAGAASAQSIKVKKGDT  | Negative |
| P54421 | KKQIITATTAVVLGSTLFAG  | Negative |
| P54421 | AGAASAQSIKVKKGDTLWDL  | Negative |
| P54421 | GAASAQSIKVKKGDTLWDL   | Negative |
| P54421 | GSTLFAGAASAQSIKVKKGD  | Negative |
| P54421 | KVKKGDTLWDLRKYDTTIS   | Negative |
| P54421 | LGSTLFAGAASAQSIKVKKG  | Negative |
| P54421 | SAQSIKVKKGDTLWDLRKY   | Negative |
| P54421 | ATTAVVLGSTLFAGAASAQS  | Negative |
| P54421 | TTAVVLGSTLFAGAASAQSI  | Negative |
| P54421 | QIITATTAVVLGSTLFAGAA  | Negative |
| P54421 | AASAQSIKVKKGDTLWDLR   | Negative |
| P54421 | IKVKKGDTLWDLRKYDTTI   | Negative |
| P54421 | FAGAASAQSIKVKKGDTLWD  | Negative |
| P54421 | SIKVKKGDTLWDLRKYDTT   | Negative |
| P54421 | VVLGSTLFAGAASAQSIKV   | Negative |
| P54423 | KRRKFSSVVA AVLIFALIFS | Negative |
| P54423 | SVVA AVLIFALIFSLFSPGT | Negative |
| P54423 | PGTKAAAAG AIDQAAALENG | Negative |
| P54423 | GTKAAAAG AIDQAAALENGK | Negative |
| P54423 | LFSPGTKAAAAG AIDQAAAL | Negative |
| P54423 | SSVVA AVLIFALIFSLFSPG | Negative |
| P54423 | MKRRKFSSVVA AVLIFALIF | Negative |
| P54423 | VAAVLIFALIFSLFSPGTKA  | Negative |
| P54423 | AAAG AIDQAAALENGKEQTG | Negative |
| P54423 | FSLFSPGTKAAAAG AIDQAA | Negative |
| P54423 | SPGTKAAAAG AIDQAAALEN | Negative |
| P54423 | TKAAAAG AIDQAAALENGKE | Negative |
| P54423 | VLIFALIFSLFSPGTKAAAA  | Negative |
| P54423 | AVLIFALIFSLFSPGTKAAA  | Negative |
| P54423 | RKFSSVVA AVLIFALIFSLF | Negative |
| P54423 | FSPGTKAAAAG AIDQAAALE | Negative |
| P54423 | LIFSLFSPGTKAAAAG AIDQ | Negative |
| P54423 | LIFALIFSLFSPGTKAAAAG  | Negative |
| P54423 | RRKFSSVVA AVLIFALIFSL | Negative |
| P54423 | AAAAG AIDQAAALENGKEQT | Negative |
| P54423 | IFALIFSLFSPGTKAAAAGA  | Negative |
| P54423 | FALIFSLFSPGTKAAAAGAI  | Negative |
| P54423 | FSSVVA AVLIFALIFSLFSP | Negative |
| P54423 | KFSSVVA AVLIFALIFSLFS | Negative |
| P54423 | IFSLFSPGTKAAAAG AIDQA | Negative |
| P54423 | AAVLIFALIFSLFSPGTKAA  | Negative |
| P54423 | KAAAAG AIDQAAALENGKEQ | Negative |
| P54423 | SLFSPGTKAAAAG AIDQAAA | Negative |
| P54423 | VVA AVLIFALIFSLFSPGTK | Negative |

|        |                      |          |
|--------|----------------------|----------|
| P54484 | LILLMLTLVVAPKEKAEAA  | Negative |
| P54484 | MKQGKFSVFLILLMLTLVV  | Negative |
| P54484 | SSGWQPVSGISGCKIRVITD | Negative |
| P54484 | LVVAPKEKAEAASSGWQPV  | Negative |
| P54484 | GKFSVFLILLMLTLVVAPK  | Negative |
| P54484 | AEAASSGWQPVSGISGCKIR | Negative |
| P54484 | KQGKFSVFLILLMLTLVVA  | Negative |
| P54484 | ILLMLTLVVAPKEKAEAA   | Negative |
| P54484 | KEKAEAASSGWQPVSGISG  | Negative |
| P54484 | LTLVVAPKEKAEAASSGWQ  | Negative |
| P54484 | KAEAASSGWQPVSGISGCKI | Negative |
| P54484 | VAPKEKAEAASSGWQPVSGI | Negative |
| P54484 | APKEKAEAASSGWQPVSGIS | Negative |
| P54484 | QGKFSVFLILLMLTLVVAP  | Negative |
| P54484 | KFSVFLILLMLTLVVAPKE  | Negative |
| P54484 | LLMLTLVVAPKEKAEAASSG | Negative |
| P54484 | FLILLMLTLVVAPKEKAEA  | Negative |
| P54484 | SVFLILLMLTLVVAPKEKA  | Negative |
| P54484 | FSVFLILLMLTLVVAPKEK  | Negative |
| P54484 | AASSGWQPVSGISGCKIRVI | Negative |
| P54484 | PKEKAEAASSGWQPVSGISG | Negative |
| P54484 | MLTLVVAPKEKAEAASSGWQ | Negative |
| P54484 | EKAEAASSGWQPVSGISGCK | Negative |
| P54484 | TLVVAPKEKAEAASSGWQPV | Negative |
| P54484 | EAASSGWQPVSGISGCKIRV | Negative |
| P54484 | LLLMLTLVVAPKEKAEAASS | Negative |
| P54484 | VVAPKEKAEAASSGWQPVSG | Negative |
| P54484 | ASSGWQPVSGISGCKIRVIT | Negative |
| P54484 | VFLILLMLTLVVAPKEKAE  | Negative |
| P54507 | LVGGGTWAAFNDIKSKDATF | Negative |
| P54507 | GLALVGGGTWAAFNDIKSKD | Negative |
| P54507 | GGTWAAFNDIKSKDATFASG | Negative |
| P54507 | LALVGGGTWAAFNDIKSKDA | Negative |
| P54507 | LGLALVGGGTWAAFNDIKSK | Negative |
| P54507 | SLGVASAALGLALVGGGTWA | Negative |
| P54507 | MGMKKKLSLGVASAALGLAL | Negative |
| P54507 | FNDIKSKDATFASGTLDSA  | Negative |
| P54507 | KKLSLGVASAALGLALVGGG | Negative |
| P54507 | MKKKLSLGVASAALGLALVG | Negative |
| P54507 | GVASAALGLALVGGGTWAAF | Negative |
| P54507 | ALVGGGTWAAFNDIKSKDAT | Negative |
| P54507 | WAAFNDIKSKDATFASGTL  | Negative |
| P54507 | AAFNDIKSKDATFASGTL   | Negative |
| P54507 | LGVASAALGLALVGGGTWAA | Negative |
| P54507 | GGGTWAAFNDIKSKDATFAS | Negative |
| P54507 | ASAALGLALVGGGTWAAFND | Negative |

|        |                       |          |
|--------|-----------------------|----------|
| P54507 | KLSLGVASAALGLALVGGGT  | Negative |
| P54507 | ALGLALVGGGTWAAFNDIKS  | Negative |
| P54507 | VASAALGLALVGGGTWAAFN  | Negative |
| P54507 | GMKKKLSLGVASAALGLALV  | Negative |
| P54507 | TWAAFNDIKSKDATFASGTL  | Negative |
| P54507 | KKKLSLGVASAALGLALVGG  | Negative |
| P54507 | LSLGVASAALGLALVGGGTW  | Negative |
| P54507 | AFNDIKSKDATFASGTL DLS | Negative |
| P54507 | VGGGTWAAFNDIKSKDATFA  | Negative |
| P54507 | GTWAAFNDIKSKDATFASGT  | Negative |
| P54507 | NDIKSKDATFASGTL DLSAK | Negative |
| P54507 | AALGLALVGGGTWAAFNDIK  | Negative |
| P54660 | LLALVTLALLFTLSSAQYTL  | Negative |
| P54660 | QYTL SVSNSASGSKCTTAVS | Negative |
| P54660 | FTLSSAQYTL SVSNSASGSK | Negative |
| P54660 | SNSASGSKCTTAVSAKL NAC | Negative |
| P54660 | LSSAQYTL SVSNSASGSKCT | Negative |
| P54660 | YTL SVSNSASGSKCTTAVSA | Negative |
| P54660 | SAQYTL SVSNSASGSKCTTA | Negative |
| P54660 | VSNSASGSKCTTAVSAKLNA  | Negative |
| P54660 | LFTLSSAQYTL SVSNSASGS | Negative |
| P54660 | NLLALVTLALLFTLSSAQYT  | Negative |
| P54660 | ALVTLALLFTLSSAQYTL SV | Negative |
| P54660 | SSAQYTL SVSNSASGSKCTT | Negative |
| P54660 | MLVLRNLLALVTLALLFTLS  | Negative |
| P54660 | NSASGSKCTTAVSAKL NACN | Negative |
| P54660 | VLRNLLALVTLALLFTLSSA  | Negative |
| P54660 | RNLLALVTLALLFTLSSAQY  | Negative |
| P54660 | AQYTL SVSNSASGSKCTTAV | Negative |
| P54660 | LRNLLALVTLALLFTLSSAQ  | Negative |
| P54660 | LLFTLSSAQYTL SVSNSASG | Negative |
| P54660 | TL SVSNSASGSKCTTAVSAK | Negative |
| P54660 | LVTLALLFTLSSAQYTL SVS | Negative |
| P54660 | LSV SNSASGSKCTTAVSAKL | Negative |
| P54660 | LVLRNLLALVTLALLFTLSS  | Negative |
| P54660 | TLALLFTLSSAQYTL SVSNS | Negative |
| P54660 | VTALLFTLSSAQYTL SVSN  | Negative |
| P54660 | SVSNSASGSKCTTAVSAKL N | Negative |
| P54660 | TLSSAQYTL SVSNSASGSKC | Negative |
| P54660 | ALLFTLSSAQYTL SVSNSAS | Negative |
| P54660 | LALLFTLSSAQYTL SVNSA  | Negative |
| P54803 | GSAGRAAVPLLLCALLAPGG  | Negative |
| P54803 | EWLLSASWQRRAKAMTAAAG  | Negative |
| P54803 | LSASWQRRAKAMTAAAGSAG  | Negative |
| P54803 | KAMTAAAGSAGRAAVPLLLC  | Negative |
| P54803 | AAGSAGRAAVPLLLCALLAP  | Negative |



|        |                       |          |
|--------|-----------------------|----------|
| P54803 | RAAVPLLLCALLAPGGAYVL  | Negative |
| P54803 | MTAAAGSAGRAAVPLLLCAL  | Negative |
| P54803 | ASWQRRAKAMTAAAGSAGRA  | Negative |
| P54803 | AKAMTAAAGSAGRAAVPLLL  | Negative |
| P54803 | SWQRRAKAMTAAAGSAGRAA  | Negative |
| P54803 | SASWQRRAKAMTAAAGSAGR  | Negative |
| P54803 | GRAAVPLLLCALLAPGGAYV  | Negative |
| P54803 | WQRRAKAMTAAAGSAGRAAV  | Negative |
| P54803 | RRAKAMTAAAGSAGRAAVPL  | Negative |
| P54803 | VPLLLCALLAPGGAYVLDDSD | Negative |
| P54803 | AGSAGRAAVPLLLCALLAPG  | Negative |
| P54803 | AAAGSAGRAAVPLLLCALLA  | Negative |
| P54803 | AAVPLLLCALLAPGGAYVLD  | Negative |
| P54803 | PLLLCALLAPGGAYVLDDSD  | Negative |
| P54803 | WLLSASWQRRAKAMTAAAGS  | Negative |
| P54803 | TAAAGSAGRAAVPLLLCALL  | Negative |
| P54803 | RAKAMTAAAGSAGRAAVPLL  | Negative |
| P54803 | LLSASWQRRAKAMTAAAGSA  | Negative |
| P54803 | AMTAAAGSAGRAAVPLLLCA  | Negative |
| P54803 | SAGRAAVPLLLCALLAPGGA  | Negative |
| P54803 | AGRAAVPLLLCALLAPGGAY  | Negative |
| P54803 | AEWLLSASWQRRAKAMTAAA  | Negative |
| P54803 | MAEWLLSASWQRRAKAMTAA  | Negative |
| P54803 | QRRAKAMTAAAGSAGRAAVP  | Negative |
| P55000 | CKEPMTSASCRTITRCKPED  | Negative |
| P55000 | LKCYTCKEPMTSASCRTITR  | Negative |
| P55000 | MGCGEALKCYTCKEPMTSAS  | Negative |
| P55000 | SMGCGEALKCYTCKEPMTSA  | Negative |
| P55000 | EALKCYTCKEPMTSASCRTI  | Negative |
| P55000 | WAVQLLLVAAWSMGCGEALK  | Negative |
| P55000 | KCYTCKEPMTSASCRTITRC  | Negative |
| P55000 | AWSMGCGEALKCYTCKEPMT  | Negative |
| P55000 | TCKEPMTSASCRTITRCKPE  | Negative |
| P55000 | SRWAVQLLLVAAWSMGCGEA  | Negative |
| P55000 | VAAWSMGCGEALKCYTCKEP  | Negative |
| P55000 | ASRWAVQLLLVAAWSMGCGE  | Negative |
| P55000 | CGEALKCYTCKEPMTSASCR  | Negative |
| P55000 | AVQLLLVAAWSMGCGEALKC  | Negative |
| P55000 | MASRWAVQLLLVAAWSMGCG  | Negative |
| P55000 | VQLLLVAAWSMGCGEALKCY  | Negative |
| P55000 | AAWSMGCGEALKCYTCKEPM  | Negative |
| P55000 | LVAAWSMGCGEALKCYTCKE  | Negative |
| P55000 | GEALKCYTCKEPMTSASCRT  | Negative |
| P55000 | LLLVAAWSMGCGEALKCYTC  | Negative |
| P55000 | WSMGCGEALKCYTCKEPMTS  | Negative |
| P55000 | YTCKEPMTSASCRTITRCKP  | Negative |

|        |                      |          |
|--------|----------------------|----------|
| P55000 | CYTCKEPMTSASCRTITRCK | Negative |
| P55000 | ALKCYTCKEPMTSASCRTIT | Negative |
| P55000 | RWAVQLLLVAAWSMGCGEAL | Negative |
| P55000 | GCGEALKCYTCKEPMTSASC | Negative |
| P55000 | EPMTSASCRTITRCKPEDTA | Negative |
| P55000 | LLVAAWSMGCGEALKCYTCK | Negative |
| P55000 | KEPMTSASCRTITRCKPEDT | Negative |
| P55058 | CKIRVTSKALELVKQEGLRF | Negative |
| P55058 | KALELVKQEGLRFLEQELET | Negative |
| P55058 | ALFLALLAGAHAEFPGCKIR | Negative |
| P55058 | LFLALLAGAHAEFPGCKIRV | Negative |
| P55058 | KIRVTSKALELVKQEGLRFL | Negative |
| P55058 | LAGAHAEFPGCKIRVTSKAL | Negative |
| P55058 | PGCKIRVTSKALELVKQEGL | Negative |
| P55058 | MALFGALFLALLAGAHAEFP | Negative |
| P55058 | LALLAGAHAEFPGCKIRVTS | Negative |
| P55058 | VTSKALELVKQEGLRFLEQE | Negative |
| P55058 | FPGCKIRVTSKALELVKQEG | Negative |
| P55058 | AHAEFPGCKIRVTSKALELV | Negative |
| P55058 | LLAGAHAEFPGCKIRVTSKA | Negative |
| P55058 | AEFPGCKIRVTSKALELVKQ | Negative |
| P55058 | SKALELVKQEGLRFLEQELE | Negative |
| P55058 | GAHAEFPGCKIRVTSKALEL | Negative |
| P55058 | FLALLAGAHAEFPGCKIRVT | Negative |
| P55058 | GALFLALLAGAHAEFPGCKI | Negative |
| P55058 | AGAHAEFPGCKIRVTSKALE | Negative |
| P55058 | HAEPGCKIRVTSKALELVK  | Negative |
| P55058 | FGALFLALLAGAHAEFPGCK | Negative |
| P55058 | RVTSKALELVKQEGLRFLEQ | Negative |
| P55058 | GCKIRVTSKALELVKQEGLR | Negative |
| P55058 | TSKALELVKQEGLRFLEQEL | Negative |
| P55058 | IRVTSKALELVKQEGLRFLE | Negative |
| P55058 | ALLAGAHAEFPGCKIRVTSK | Negative |
| P55058 | ALELVKQEGLRFLEQELETI | Negative |
| P55058 | ALFGALFLALLAGAHAEFPG | Negative |
| P55058 | EFPGCKIRVTSKALELVKQE | Negative |
| P55083 | TPPCAPQVSGIRGDALERFC | Negative |
| P55083 | LALPLLLLLSTPPCAPQVSG | Negative |
| P55083 | PQVSGIRGDALERFCLQQPL | Negative |
| P55083 | DALERFCLQQPLDCDDIYAQ | Negative |
| P55083 | LLALPLLLLLSTPPCAPQVS | Negative |
| P55083 | LERFCLQQPLDCDDIYAQGY | Negative |
| P55083 | PLLLLLSTPPCAPQVSGIRG | Negative |
| P55083 | STPPCAPQVSGIRGDALERF | Negative |
| P55083 | CAPQVSGIRGDALERFCLQQ | Negative |
| P55083 | ALLALPLLLLLSTPPCAPQV | Negative |

|        |                       |          |
|--------|-----------------------|----------|
| P55083 | PPCAPQVSGIRGDALERFCL  | Negative |
| P55083 | RGDALERFCLQQPLDCDDIY  | Negative |
| P55083 | LSTPPCAPQVSGIRGDALER  | Negative |
| P55083 | SGIRGDALERFCLQQPLDCD  | Negative |
| P55083 | PCAPQVSGIRGDALERFCLQ  | Negative |
| P55083 | VSGIRGDALERFCLQQPLDC  | Negative |
| P55083 | APQVSGIRGDALERFCLQQP  | Negative |
| P55083 | GIRGDALERFCLQQPLDCDD  | Negative |
| P55083 | LLLLLSTPPCAPQVSGIRGD  | Negative |
| P55083 | KALLALPLLLLLSTPPCAPQ  | Negative |
| P55083 | LLLLSTPPCAPQVSGIRGDA  | Negative |
| P55083 | QVSGIRGDALERFCLQQPLD  | Negative |
| P55083 | IRGDALERFCLQQPLDCDDI  | Negative |
| P55083 | GDALERFCLQQPLDCDDIYA  | Negative |
| P55083 | LLSTPPCAPQVSGIRGDALE  | Negative |
| P55083 | LLLSTPPCAPQVSGIRGDAL  | Negative |
| P55083 | ALPLLLLLLSTPPCAPQVSGI | Negative |
| P55083 | ALERFCLQQPLDCDDIYAQG  | Negative |
| P55083 | MKALLALPLLLLLSTPPCAP  | Negative |
| P55145 | GSRALRPGDCEVCISYLGRF  | Negative |
| P55145 | PGSRALRPGDCEVCISYLGR  | Negative |
| P55145 | DCEVCISYLGRFYQDLKDRD  | Negative |
| P55145 | MWATQGLAVALALSVLPGSR  | Negative |
| P55145 | RRMWATQGLAVALALSVLPG  | Negative |
| P55145 | WATQGLAVALALSVLPGSRA  | Negative |
| P55145 | PGDCEVCISYLGRFYQDLKD  | Negative |
| P55145 | LRPGDCEVCISYLGRFYQDL  | Negative |
| P55145 | CEVCISYLGRFYQDLKDRDV  | Negative |
| P55145 | LSVLPGSRALRPGDCEVCIS  | Negative |
| P55145 | AVALALSVLPGSRALRPGDC  | Negative |
| P55145 | QGLAVALALSVLPGSRALRP  | Negative |
| P55145 | VALALSVLPGSRALRPGDCE  | Negative |
| P55145 | ATQGLAVALALSVLPGSRAL  | Negative |
| P55145 | SVLPGSRALRPGDCEVCISY  | Negative |
| P55145 | ALRPGDCEVCISYLGRFYQD  | Negative |
| P55145 | VLPGSRALRPGDCEVCISYL  | Negative |
| P55145 | GDCEVCISYLGRFYQDLKDR  | Negative |
| P55145 | RALRPGDCEVCISYLGRFYQ  | Negative |
| P55145 | MRRMWATQGLAVALALSVLP  | Negative |
| P55145 | SRALRPGDCEVCISYLGRFY  | Negative |
| P55145 | RMWATQGLAVALALSVLPGS  | Negative |
| P55145 | TQGLAVALALSVLPGSRALR  | Negative |
| P55145 | RPGDCEVCISYLGRFYQDLK  | Negative |
| P55145 | LALSVLPGSRALRPGDCEVC  | Negative |
| P55145 | ALSVLPGSRALRPGDCEVCI  | Negative |
| P55145 | LPGSRALRPGDCEVCISYLG  | Negative |

|        |                       |          |
|--------|-----------------------|----------|
| P55145 | ALALSVLPGSRALRPGDCEV  | Negative |
| P55145 | GLAVALALSVLPGSRALRPG  | Negative |
| P55319 | PNWGTGKRDAADFADPYSFL  | Negative |
| P55319 | CSAQLNFTPNNWGTGKRDAAD | Negative |
| P55319 | ALVVLLVVAVAAALCSAQLN  | Negative |
| P55319 | AALCSAQLNFTPNNWGTGKR  | Negative |
| P55319 | WGTGKRDAADFADPYSFLYR  | Negative |
| P55319 | LVVAVAAALCSAQLNFTPNN  | Negative |
| P55319 | NFTPNNWGTGKRDAADFADPY | Negative |
| P55319 | VAVAAALCSAQLNFTPNNWT  | Negative |
| P55319 | VVAVAAALCSAQLNFTPNNW  | Negative |
| P55319 | NWGTGKRDAADFADPYSFLY  | Negative |
| P55319 | QRCALVVLLVVAVAAALCSA  | Negative |
| P55319 | LLVVAVAAALCSAQLNFTPNN | Negative |
| P55319 | VAAALCSAQLNFTPNNWGTGK | Negative |
| P55319 | FTPNNWGTGKRDAADFADPYS | Negative |
| P55319 | AQLNFTPNNWGTGKRDAADF  | Negative |
| P55319 | CALVVLLVVAVAAALCSAQL  | Negative |
| P55319 | VLLVVAVAAALCSAQLNFTP  | Negative |
| P55319 | LCSAQLNFTPNNWGTGKRDA  | Negative |
| P55319 | LVVLLVVAVAAALCSAQLNF  | Negative |
| P55319 | TPNNWGTGKRDAADFADPYSF | Negative |
| P55319 | SAQLNFTPNNWGTGKRDAADF | Negative |
| P55319 | ALCSAQLNFTPNNWGTGKRDA | Negative |
| P55319 | LNFTPNNWGTGKRDAADFADP | Negative |
| P55319 | AVAAALCSAQLNFTPNNWGTG | Negative |
| P55319 | VQRCALVVLLVVAVAAALCS  | Negative |
| P55319 | RCALVVLLVVAVAAALCSAQ  | Negative |
| P55319 | QLNFTPNNWGTGKRDAADFAD | Negative |
| P55319 | AAALCSAQLNFTPNNWGTGKR | Negative |
| P55319 | MVQRCALVVLLVVAVAAALC  | Negative |
| P55320 | LLLIVVVVLCGSVTQQASAW  | Negative |
| P55320 | VTRVGSGFSVQRVWLLLIV   | Negative |
| P55320 | LCGSVTQQASAWFTNDECPG  | Negative |
| P55320 | CGSVTQQASAWFTNDECPGV  | Negative |
| P55320 | WLLLIVVVVLCGSVTQQASA  | Negative |
| P55320 | VTQQASAWFTNDECPGVMGN  | Negative |
| P55320 | VQRVWLLLIVVVVLCGSVTQ  | Negative |
| P55320 | GSGFSVQRVWLLLIVVVLC   | Negative |
| P55320 | RVGSGFSVQRVWLLLIVVV   | Negative |
| P55320 | QRVWLLLIVVVVLCGSVTQQ  | Negative |
| P55320 | VGSGFSVQRVWLLLIVVV    | Negative |
| P55320 | TRVGSGFSVQRVWLLLIVV   | Negative |
| P55320 | RVWLLLIVVVVLCGSVTQQA  | Negative |
| P55320 | GSVTQQASAWFTNDECPGVM  | Negative |
| P55320 | LVIVVVLCGSVTQQASAWFT  | Negative |

|        |                        |          |
|--------|------------------------|----------|
| P55320 | SGFSVQRVWLLLIVVVVLCG   | Negative |
| P55320 | QQASAWFTNDECPGVMGNRD   | Negative |
| P55320 | VIVVVLCGSVTQQASAWFTN   | Negative |
| P55320 | SVTQQASAWFTNDECPGVMG   | Negative |
| P55320 | VLCGSVTQQASAWFTNDECP   | Negative |
| P55320 | VWLLLIVVVVLCGSVTQQAS   | Negative |
| P55320 | FSVQRVWLLLIVVVVLCGSV   | Negative |
| P55320 | TQQASAWFTNDECPGVMGNR   | Negative |
| P55320 | VVVLCGSVTQQASAWFTNDE   | Negative |
| P55320 | GFSVQRVWLLLIVVVVLCGS   | Negative |
| P55320 | MVTRVGSVSGFSVQRVWLLLVI | Negative |
| P55320 | IVVVLCGSVTQQASAWFTND   | Negative |
| P55320 | SVQRVWLLLIVVVVLCGSVT   | Negative |
| P55320 | VVLCGSVTQQASAWFTNDEC   | Negative |
| P55773 | KVSVAALSCLMLVTALGSQA   | Negative |
| P55773 | LGSQARVTKDAETEFMMSKL   | Negative |
| P55773 | GSQARVTKDAETEFMMSKLP   | Negative |
| P55773 | MLVTALGSQARVTKDAETEF   | Negative |
| P55773 | EFMMSKLPLENPVLLDRFHA   | Negative |
| P55773 | SVAALSCLMLVTALGSQARV   | Negative |
| P55773 | QARVTKDAETEFMMSKLPLE   | Negative |
| P55773 | ALGSQARVTKDAETEFMMSK   | Negative |
| P55773 | VTALGSQARVTKDAETEFMM   | Negative |
| P55773 | LMLVTALGSQARVTKDAETE   | Negative |
| P55773 | VTKDAETEFMMSKLPLENPV   | Negative |
| P55773 | SQARVTKDAETEFMMSKLPL   | Negative |
| P55773 | MKVSVAALSCLMLVTALGSQ   | Negative |
| P55773 | ETEFMMSKLPLENPVLLDRF   | Negative |
| P55773 | LVTALGSQARVTKDAETEFM   | Negative |
| P55773 | TKDAETEFMMSKLPLENPVL   | Negative |
| P55773 | VAALSCLMLVTALGSQARVT   | Negative |
| P55773 | AETEFMMSKLPLENPVLLDR   | Negative |
| P55773 | SCLMLVTALGSQARVTKDAE   | Negative |
| P55773 | TALGSQARVTKDAETEFMMS   | Negative |
| P55773 | VSVAALSCLMLVTALGSQAR   | Negative |
| P55773 | RVTKDAETEFMMSKLPLENP   | Negative |
| P55773 | ARVTKDAETEFMMSKLPLEN   | Negative |
| P55773 | DAETEFMMSKLPLENPVLLD   | Negative |
| P55773 | AALSCLMLVTALGSQARVTK   | Negative |
| P55773 | LSCLMLVTALGSQARVTKDA   | Negative |
| P55773 | KDAETEFMMSKLPLENPVLL   | Negative |
| P55773 | CLMLVTALGSQARVTKDAET   | Negative |
| P55773 | TEFMMSKLPLENPVLLDRFH   | Negative |
| P55774 | ALCSCAQVGTNKECCLVYT    | Negative |
| P55774 | LAAALLVLVCTMALCSCAQV   | Negative |
| P55774 | AQVGTNKECCLVYTSWQIP    | Negative |

|        |                      |          |
|--------|----------------------|----------|
| P55774 | LCCLVYTSWQIPQKFIVDYS | Negative |
| P55774 | NKELCCLVYTSWQIPQKFIV | Negative |
| P55774 | ELCCLVYTSWQIPQKFIVDY | Negative |
| P55774 | KGLAAALLVLVCTMALCSCA | Negative |
| P55774 | AAALLVLVCTMALCSCAQVG | Negative |
| P55774 | SCAQVGTNKELCCLVYTSWQ | Negative |
| P55774 | GLAAALLVLVCTMALCSCAQ | Negative |
| P55774 | CSCAQVGTNKELCCLVYTSW | Negative |
| P55774 | CTMALCSCAQVGTNKELCCL | Negative |
| P55774 | MKGLAAALLVLVCTMALCSC | Negative |
| P55774 | QVGTNKELCCLVYTSWQIPQ | Negative |
| P55774 | LVLVCTMALCSCAQVGTNKE | Negative |
| P55774 | CAQVGTNKELCCLVYTSWQI | Negative |
| P55774 | LLVLVCTMALCSCAQVGTNK | Negative |
| P55774 | GTNKELCCLVYTSWQIPQKF | Negative |
| P55774 | VGTNKELCCLVYTSWQIPQK | Negative |
| P55774 | TNKELCCLVYTSWQIPQKFI | Negative |
| P55774 | KELCCLVYTSWQIPQKFIVD | Negative |
| P55774 | MALCSCAQVGTNKELCCLVY | Negative |
| P55774 | LVCTMALCSCAQVGTNKELC | Negative |
| P55774 | VLVCTMALCSCAQVGTNKEL | Negative |
| P55774 | LCSCAQVGTNKELCCLVYTS | Negative |
| P55774 | VCTMALCSCAQVGTNKELCC | Negative |
| P55774 | TMALCSCAQVGTNKELCCLV | Negative |
| P55774 | ALLVLVCTMALCSCAQVGTN | Negative |
| P55774 | CCLVYTSWQIPQKFIVDYSE | Negative |
| P55847 | MRTWLAIVIVVVGTSLLFDT | Negative |
| P55847 | GTSLLFDTASASFIDNTRCG | Negative |
| P55847 | AIVIVVVGTSLLFDTASASF | Negative |
| P55847 | MYRLAMRTWLAIVIVVVGTS | Negative |
| P55847 | TSLLFDTASASFIDNTRCGV | Negative |
| P55847 | SLLFDTASASFIDNTRCGVM | Negative |
| P55847 | FIDNTRCGVMGNRDIYKKVV | Negative |
| P55847 | SFIDNTRCGVMGNRDIYKKV | Negative |
| P55847 | IVIVVVGTSLLFDTASASFI | Negative |
| P55847 | LAIVIVVVGTSLLFDTASAS | Negative |
| P55847 | AMRTWLAIVIVVVGTSLLFD | Negative |
| P55847 | SASFIDNTRCGVMGNRDIYK | Negative |
| P55847 | LLFDTASASFIDNTRCGVMG | Negative |
| P55847 | WLAIVIVVVGTSLLFDTASA | Negative |
| P55847 | DTASASFIDNTRCGVMGNRD | Negative |
| P55847 | RLAMRTWLAIVIVVVGTSLL | Negative |
| P55847 | VVGTSLLFDTASASFIDNTC | Negative |
| P55847 | LFDTASASFIDNTRCGVMGN | Negative |
| P55847 | VGTSLLFDTASASFIDNTRC | Negative |
| P55847 | TASASFIDNTRCGVMGNRDI | Negative |

|        |                        |          |
|--------|------------------------|----------|
| P55847 | VVVGTSLLFDTASASFIDNT   | Negative |
| P55847 | ASFIDNTCRGVMGNRDIYKK   | Negative |
| P55847 | TWLAIIVVVVGTSLLFDTAS   | Negative |
| P55847 | LAMRTWLAIVIVVVVGTSLLF  | Negative |
| P55847 | VIVVVGTSLLFDTASASFID   | Negative |
| P55847 | RTWLAIIVIVVVVGTSLLFDTA | Negative |
| P55847 | ASASFIDNTCRGVMGNRDIY   | Negative |
| P55847 | YRLAMRTWLAIVIVVVGTSL   | Negative |
| P55847 | FDTASASFIDNTCRGVMGNR   | Negative |
| P55929 | AGVMAANEPIQPIKAVTPEN   | Negative |
| P55929 | LSLGAMFASAGVMAANEPIQ   | Negative |
| P55929 | ASAGVMAANEPIQPIKAVTP   | Negative |
| P55929 | IKRTLTVSLLSLSLGAMFAS   | Negative |
| P55929 | TVSLLSLSLGAMFASAGVMA   | Negative |
| P55929 | GAMFASAGVMAANEPIQPIK   | Negative |
| P55929 | FASAGVMAANEPIQPIKAVT   | Negative |
| P55929 | MIKRTLTVSLLSLSLGAMFA   | Negative |
| P55929 | SLGAMFASAGVMAANEPIQP   | Negative |
| P55929 | TLTVSLLSLSLGAMFASAGV   | Negative |
| P55929 | AANEPIQPIKAVTPENADMA   | Negative |
| P55929 | SLLSLSLGAMFASAGVMAAN   | Negative |
| P55929 | ANEPIQPIKAVTPENADMAE   | Negative |
| P55929 | LTVSLLSLSLGAMFASAGVM   | Negative |
| P55929 | GVMAANEPIQPIKAVTPENA   | Negative |
| P55929 | EPIQPIKAVTPENADMAELG   | Negative |
| P55929 | LGAMFASAGVMAANEPIQPI   | Negative |
| P55929 | MAANEPIQPIKAVTPENADM   | Negative |
| P55929 | AMFASAGVMAANEPIQPIKA   | Negative |
| P55929 | LLSLSLGAMFASAGVMAANE   | Negative |
| P55929 | RTLTVSLLSLSLGAMFASAG   | Negative |
| P55929 | LSLSLGAMFASAGVMAANEP   | Negative |
| P55929 | VMAANEPIQPIKAVTPENAD   | Negative |
| P55929 | NEPIQPIKAVTPENADMAEL   | Negative |
| P55929 | SAGVMAANEPIQPIKAVTPE   | Negative |
| P55929 | KRTLTVSLLSLSLGAMFASA   | Negative |
| P55929 | VSLLSLSLGAMFASAGVMAA   | Negative |
| P55929 | PIQPIKAVTPENADMAELGK   | Negative |
| P55929 | MFASAGVMAANEPIQPIKAV   | Negative |
| P55955 | MRSLVVCLLLAACALECTAR   | Negative |
| P55955 | KGVAVCNKKRLANVEVQLYE   | Negative |
| P55955 | TVKGVAVCNKKRLANVEVQL   | Negative |
| P55955 | TARLQNVTVKGVAVCNKKRL   | Negative |
| P55955 | AACALECTARLQNVTVKGA    | Negative |
| P55955 | VAVCNKKRLANVEVQLYEKD   | Negative |
| P55955 | LVVCLLLAACALECTARLQN   | Negative |
| P55955 | LLLAACALECTARLQNVTVK   | Negative |

|        |                      |          |
|--------|----------------------|----------|
| P55955 | RLQNVTVKGVAVCNKKRLAN | Negative |
| P55955 | VTVKGVAVCNKKRLANVEVQ | Negative |
| P55955 | LQNVTVKGVAVCNKKRLANV | Negative |
| P55955 | NVTVKGVAVCNKKRLANVEV | Negative |
| P55955 | CTARLQNVTVKGVAVCNKKR | Negative |
| P55955 | CALECTARLQNVTVKGVAVC | Negative |
| P55955 | ECTARLQNVTVKGVAVCNKK | Negative |
| P55955 | LLAACALECTARLQNVTVKG | Negative |
| P55955 | LECTARLQNVTVKGVAVCNK | Negative |
| P55955 | ACALECTARLQNVTVKGVAV | Negative |
| P55955 | SLVVCLLLAACALECTARLQ | Negative |
| P55955 | VKGVAVCNKKRLANVEVQLY | Negative |
| P55955 | GVAVCNKKRLANVEVQLYEK | Negative |
| P55955 | AVCNKKRLANVEVQLYEKDT | Negative |
| P55955 | VCLLLAACALECTARLQNV  | Negative |
| P55955 | CLLLAACALECTARLQNVTV | Negative |
| P55955 | ARLQNVTVKGVAVCNKKRLA | Negative |
| P55955 | LAACALECTARLQNVTVKGV | Negative |
| P55955 | RSLVVCLLLAACALECTARL | Negative |
| P55955 | QNVTVKGVAVCNKKRLANVE | Negative |
| P55955 | ALECTARLQNVTVKGVAVCN | Negative |
| P56202 | PLRAQDLGPQPLELKEAFKL | Negative |
| P56202 | LTAHPSCLLALLVAGLAQGI | Negative |
| P56202 | LVAGLAQGIRGPLRAQDLGP | Negative |
| P56202 | IRGPLRAQDLGPQPLELKEA | Negative |
| P56202 | LALLVAGLAQGIRGPLRAQD | Negative |
| P56202 | SCLLALLVAGLAQGIRGPLR | Negative |
| P56202 | QDLGPQPLELKEAFKLFQIQ | Negative |
| P56202 | LLALLVAGLAQGIRGPLRAQ | Negative |
| P56202 | LLVAGLAQGIRGPLRAQDLG | Negative |
| P56202 | VAGLAQGIRGPLRAQDLGPQ | Negative |
| P56202 | AGLAQGIRGPLRAQDLGPQP | Negative |
| P56202 | AQDLGPQPLELKEAFKLFQI | Negative |
| P56202 | DLGPQPLELKEAFKLFQIQF | Negative |
| P56202 | GPLRAQDLGPQPLELKEAFK | Negative |
| P56202 | MALTAHPSCLLALLVAGLAQ | Negative |
| P56202 | GIRGPLRAQDLGPQPLELKE | Negative |
| P56202 | GLAQGIRGPLRAQDLGPQPL | Negative |
| P56202 | TAHPSCLLALLVAGLAQGIR | Negative |
| P56202 | CLLALLVAGLAQGIRGPLRA | Negative |
| P56202 | RGPLRAQDLGPQPLELKEAF | Negative |
| P56202 | AHPSCLLALLVAGLAQGIRG | Negative |
| P56202 | HPSCLLALLVAGLAQGIRGP | Negative |
| P56202 | AQGIRGPLRAQDLGPQPLEL | Negative |
| P56202 | ALTAHPSCLLALLVAGLAQG | Negative |
| P56202 | RAQDLGPQPLELKEAFKLFQ | Negative |



|        |                      |          |
|--------|----------------------|----------|
| P56202 | QGIRGPLRAQDLGPQPLELK | Negative |
| P56202 | ALLVAGLAQGIRGPLRAQDL | Negative |
| P56202 | LRAQDLGPQPLELKEAFKLF | Negative |
| P56202 | LAQGIRGPLRAQDLGPQPLE | Negative |
| P56526 | QSLSTTAPSQPQFTIPASA  | Negative |
| P56526 | SQSLSTTAPSQPQFTIPAS  | Negative |
| P56526 | ASQSLSTTAPSQPQFTIPA  | Negative |
| P56526 | PSQPQFTIPASADVGAQLIA | Negative |
| P56526 | PLAYGASQSLSTTAPSQPQ  | Negative |
| P56526 | GASQSLSTTAPSQPQFTIP  | Negative |
| P56526 | TAPSQPQFTIPASADVGAQL | Negative |
| P56526 | STTAPSQPQFTIPASADVGA | Negative |
| P56526 | LARAWLVPLAYGASQSLST  | Negative |
| P56526 | TTAPSQPQFTIPASADVGAQ | Negative |
| P56526 | SLLSTTAPSQPQFTIPASAD | Negative |
| P56526 | LLSTTAPSQPQFTIPASADV | Negative |
| P56526 | KLTHLLARAWLVPLAYGASQ | Negative |
| P56526 | LLARAWLVPLAYGASQSLLS | Negative |
| P56526 | RAWLVPLAYGASQSLSTTA  | Negative |
| P56526 | ARAWLVPLAYGASQSLSTT  | Negative |
| P56526 | WLVPLAYGASQSLSTTAPS  | Negative |
| P56526 | APSQPQFTIPASADVGAQLI | Negative |
| P56526 | VKLTHLLARAWLVPLAYGAS | Negative |
| P56526 | YGASQSLSTTAPSQPQFTI  | Negative |
| P56526 | LAYGASQSLSTTAPSQPQF  | Negative |
| P56526 | THLLARAWLVPLAYGASQSL | Negative |
| P56526 | LTHLLARAWLVPLAYGASQS | Negative |
| P56526 | AYGASQSLSTTAPSQPQFT  | Negative |
| P56526 | MVKLTHLLARAWLVPLAYGA | Negative |
| P56526 | LSTTAPSQPQFTIPASADV  | Negative |
| P56526 | VPLAYGASQSLSTTAPSQP  | Negative |
| P56526 | HLLARAWLVPLAYGASQSL  | Negative |
| P56526 | LVPLAYGASQSLSTTAPSQ  | Negative |
| P56595 | MVLEGPAPAQAAGEISSTFE | Negative |
| P56595 | VLEGPAPAQAAGEISSTFER | Negative |
| P56595 | AQAAGEISSTFERIPDKLKE | Negative |
| P56595 | RLILSLPVLVVVLSMVLEGP | Negative |
| P56595 | PAPAQAAGEISSTFERIPDK | Negative |
| P56595 | LILSLPVLVVVLSMVLEGPA | Negative |
| P56595 | VVVLSMVLEGPAPAQAAGEI | Negative |
| P56595 | GPAPAQAAGEISSTFERIPD | Negative |
| P56595 | LPVLVVVLSMVLEGPAPAQA | Negative |
| P56595 | LSMVLEGPAPAQAAGEISST | Negative |
| P56595 | VLVVVLSMVLEGPAPAQAAG | Negative |
| P56595 | GEISSTFERIPDKLKEFGNT | Negative |
| P56595 | LEGPAPAQAAGEISSTFERI | Negative |

|        |                      |          |
|--------|----------------------|----------|
| P56595 | SMVLEGPAPAQAAGEISSTF | Negative |
| P56595 | PVLVVVLSMVLEGPAPAQA  | Negative |
| P56595 | APAQAAGEISSTFERIPDKL | Negative |
| P56595 | SLPVLVVVLSMVLEGPAPAQ | Negative |
| P56595 | AAGEISSTFERIPDKLKEFG | Negative |
| P56595 | AGEISSTFERIPDKLKEFGN | Negative |
| P56595 | LSLPVLVVVLSMVLEGPAPA | Negative |
| P56595 | QAAGEISSTFERIPDKLKEF | Negative |
| P56595 | MRLILSLPVLVVVLSMVLEG | Negative |
| P56595 | PAQAAGEISSTFERIPDKLK | Negative |
| P56595 | LVVVLSMVLEGPAPAQAAGE | Negative |
| P56595 | EISSTFERIPDKLKEFGNTL | Negative |
| P56595 | EGPAPAQAAGEISSTFERIP | Negative |
| P56595 | ISSTFERIPDKLKEFGNTLE | Negative |
| P56595 | VLSMVLEGPAPAQAAGEISS | Negative |
| P56595 | ILSLPVLVVVLSMVLEGPAP | Negative |
| P56611 | IGIVVECKEGYLMDEGCKL  | Negative |
| P56611 | MDHEGCKLSCFIRPSGYCGS | Negative |
| P56611 | CKEGYLMDEGCKLSCFIRP  | Negative |
| P56611 | VVECKEGYLMDEGCKLSCF  | Negative |
| P56611 | DHEGCKLSCFIRPSGYCGSE | Negative |
| P56611 | LMDHEGCKLSCFIRPSGYCG | Negative |
| P56611 | KEGYLMDEGCKLSCFIRPS  | Negative |
| P56611 | EGYLMDEGCKLSCFIRPSG  | Negative |
| P56611 | GMILFISCLLLIGIVVECKE | Negative |
| P56611 | LLIGIVVECKEGYLMDEGC  | Negative |
| P56611 | KGMILFISCLLLIGIVVECK | Negative |
| P56611 | MILFISCLLLIGIVVECKEG | Negative |
| P56611 | MKGMILFISCLLLIGIVVEC | Negative |
| P56611 | GYLMDEGCKLSCFIRPSGY  | Negative |
| P56611 | VECKEGYLMDEGCKLSCFI  | Negative |
| P56611 | CLLLIGIVVECKEGYLMDE  | Negative |
| P56611 | EGCKLSCFIRPSGYCGSECK | Negative |
| P56611 | IVVECKEGYLMDEGCKLSC  | Negative |
| P56611 | ISCLLLIGIVVECKEGYLM  | Negative |
| P56611 | ILFISCLLLIGIVVECKEGY | Negative |
| P56611 | GCKLSCFIRPSGYCGSECKI | Negative |
| P56611 | GIVVECKEGYLMDEGCKLS  | Negative |
| P56611 | LLIGIVVECKEGYLMDEG   | Negative |
| P56611 | FISCLLLIGIVVECKEGYLM | Negative |
| P56611 | LIGIVVECKEGYLMDEGCK  | Negative |
| P56611 | YLMDEGCKLSCFIRPSGYC  | Negative |
| P56611 | HEGCKLSCFIRPSGYCGSEC | Negative |
| P56611 | ECKEGYLMDEGCKLSCFIR  | Negative |
| P56611 | SCLLLIGIVVECKEGYLMDH | Negative |
| P56612 | GCKLSCFIRPSGYCGRECTL | Negative |

|        |                       |          |
|--------|-----------------------|----------|
| P56612 | HEGCKLSCFIRPSGYCGREC  | Negative |
| P56612 | KGMILFISCLLLIDIVVGGK  | Negative |
| P56612 | LLIDIVVGGKEGYLMDHEG   | Negative |
| P56612 | CLLLIDIVVGGKEGYLMDHE  | Negative |
| P56612 | VVGGKEGYLMDHEGCKLSCF  | Negative |
| P56612 | LFISCLLLIDIVVGGKEGYL  | Negative |
| P56612 | IVVGGKEGYLMDHEGCKLSC  | Negative |
| P56612 | MDHEGCKLSCFIRPSGYCGR  | Negative |
| P56612 | GMILFISCLLLIDIVVGGKE  | Negative |
| P56612 | DIVVGGKEGYLMDHEGCKLS  | Negative |
| P56612 | ISCLLLIDIVVGGKEGYLMD  | Negative |
| P56612 | FISCLLLIDIVVGGKEGYLM  | Negative |
| P56612 | MILFISCLLLIDIVVGGKEG  | Negative |
| P56612 | EGCKLSCFIRPSGYCGRECT  | Negative |
| P56612 | LMDHEGCKLSCFIRPSGYCG  | Negative |
| P56612 | KEGYLMDHEGCKLSCFIRPS  | Negative |
| P56612 | LLIDIVVGGKEGYLMDHEGC  | Negative |
| P56612 | EGYLMDHEGCKLSCFIRPSG  | Negative |
| P56612 | SCLLLIDIVVGGKEGYLMDH  | Negative |
| P56612 | VGGKEGYLMDHEGCKLSCFI  | Negative |
| P56612 | IDIVVGGKEGYLMDHEGCKL  | Negative |
| P56612 | LIDIVVGGKEGYLMDHEGCK  | Negative |
| P56612 | GYLMDHEGCKLSCFIRPSGY  | Negative |
| P56612 | MKGMILFISCLLLIDIVVGG  | Negative |
| P56612 | DHEGCKLSCFIRPSGYCGRE  | Negative |
| P56612 | YLMMDHEGCKLSCFIRPSGYC | Negative |
| P56612 | GKEGYLMDHEGCKLSCFIRP  | Negative |
| P56612 | GGKEGYLMDHEGCKLSCFIR  | Negative |
| P56626 | ISLGSPTAIGDVSFDLSTAT  | Negative |
| P56626 | PTAIGDVSFDLSTATKKSYS  | Negative |
| P56626 | AIGDVSFDLSTATKKSYSSF  | Negative |
| P56626 | GDVSFDLSTATKKSYSSFIT  | Negative |
| P56626 | LGSPTAIGDVSFDLSTATKK  | Negative |
| P56626 | TAIGDVSFDLSTATKKSYSS  | Negative |
| P56626 | SFFFLAISLGSPTAIGDVSF  | Negative |
| P56626 | LAISLGSPTAIGDVSFDLST  | Negative |
| P56626 | LSFFFLAISLGSPTAIGDVS  | Negative |
| P56626 | ALSFFFLAISLGSPTAIGDV  | Negative |
| P56626 | KKSYSSFITQLRDALPTQGT  | Negative |
| P56626 | IGDVSFDLSTATKKSYSSFI  | Negative |
| P56626 | ATKKSYSSFITQLRDALPTQ  | Negative |
| P56626 | SFDLSTATKKSYSSFITQLR  | Negative |
| P56626 | FDLSTATKKSYSSFITQLRD  | Negative |
| P56626 | MALSFFFLAISLGSPTAIGD  | Negative |
| P56626 | TATKKSYSSFITQLRDALPT  | Negative |
| P56626 | TKKSYSSFITQLRDALPTQG  | Negative |

|        |                       |          |
|--------|-----------------------|----------|
| P56626 | FLAISLGSPTAIGDVSFDSL  | Negative |
| P56626 | LSTATKKSYSFFITQLRDAL  | Negative |
| P56626 | FFLAISLGSPTAIGDVSFDDL | Negative |
| P56626 | STATKKSYSFFITQLRDALP  | Negative |
| P56626 | SPTAIGDVSFDDLSTATKKS  | Negative |
| P56626 | DVSFDLSTATKKSYSFFITQ  | Negative |
| P56626 | VSFDDLSTATKKSYSFFITQL | Negative |
| P56626 | DLSTATKKSYSFFITQLRDA  | Negative |
| P56626 | GSPTAIGDVSFDDLSTATKKS | Negative |
| P56626 | AISLGSPTAIGDVSFDDLSTA | Negative |
| P56626 | SLGSPTAIGDVSFDDLSTATK | Negative |
| P56637 | LMCLIIFPIMGVLGKKNGYP  | Negative |
| P56637 | NGYPLDRNGKTTECSGVNAI  | Negative |
| P56637 | KFFLMCLIIFPIMGVLGKKN  | Negative |
| P56637 | IIFPIMGVLGKKNGYPLDRN  | Negative |
| P56637 | KTTECSGVNAIAPHYCNS    | Negative |
| P56637 | FFLMCLIIFPIMGVLGKKNG  | Negative |
| P56637 | MCLIIFPIMGVLGKKNGYPL  | Negative |
| P56637 | KNGYPLDRNGKTTECSGVNA  | Negative |
| P56637 | DRNGKTTECSGVNAIAPHYC  | Negative |
| P56637 | LGKKNGYPLDRNGKTTECSG  | Negative |
| P56637 | LDRNGKTTECSGVNAIAPHY  | Negative |
| P56637 | IMGVLGKKNGYPLDRNGKTT  | Negative |
| P56637 | CLIIFPIMGVLGKKNGYPLD  | Negative |
| P56637 | GKTTECSGVNAIAPHYCNS   | Negative |
| P56637 | YPLDRNGKTTECSGVNAIAP  | Negative |
| P56637 | GKKNGYPLDRNGKTTECSGV  | Negative |
| P56637 | FPIMGVLGKKNGYPLDRNGK  | Negative |
| P56637 | GVLGKKNGYPLDRNGKTTEC  | Negative |
| P56637 | NGKTTECSGVNAIAPHYCNS  | Negative |
| P56637 | KKNGYPLDRNGKTTECSGVN  | Negative |
| P56637 | VLGKKNGYPLDRNGKTTECS  | Negative |
| P56637 | MGVLGKKNGYPLDRNGKTTE  | Negative |
| P56637 | IFPIMGVLGKKNGYPLDRNG  | Negative |
| P56637 | PLDRNGKTTECSGVNAIAPH  | Negative |
| P56637 | MKFFLMCLIIFPIMGVLGKK  | Negative |
| P56637 | RNGKTTECSGVNAIAPHYCNS | Negative |
| P56637 | PIMGVLGKKNGYPLDRNGKT  | Negative |
| P56637 | GYPLDRNGKTTECSGVNAIA  | Negative |
| P56637 | LIIFPIMGVLGKKNGYPLDR  | Negative |
| P56742 | EECFRETDYEEFLEIAKNGL  | Negative |
| P56742 | RETDYEEFLEIAKNGLTATS  | Negative |
| P56742 | NPLEECFRETDYEEFLEIAK  | Negative |
| P56742 | AALGSCAHDNRNPLEECFRET | Negative |
| P56742 | HDRNPLEECFRETDYEEFLE  | Negative |
| P56742 | MNVFFMFSLFLAALGSCAH   | Negative |

|        |                      |          |
|--------|----------------------|----------|
| P56742 | LAALGSCAHDRNPLEECFRE | Negative |
| P56742 | FMFSLLFLAALGSCAHDRNP | Negative |
| P56742 | FSLFLAALGSCAHDRNPLE  | Negative |
| P56742 | FLAALGSCAHDRNPLEECFR | Negative |
| P56742 | RNPLEECFRETDYEEFLEIA | Negative |
| P56742 | SCAHDRNPLEECFRETDYEE | Negative |
| P56742 | VFFMFSLLFLAALGSCAHDR | Negative |
| P56742 | ALGSCAHDRNPLEECFRETD | Negative |
| P56742 | LEECFRETDYEEFLEIAKNG | Negative |
| P56742 | LFLAALGSCAHDRNPLEECF | Negative |
| P56742 | LLFLAALGSCAHDRNPLEEC | Negative |
| P56742 | CFRETDYEEFLEIAKNGLTA | Negative |
| P56742 | MFSLLFLAALGSCAHDRNPL | Negative |
| P56742 | ECFRETDYEEFLEIAKNGLT | Negative |
| P56742 | SLLFLAALGSCAHDRNPLEE | Negative |
| P56742 | NVFFMFSLLFLAALGSCAHD | Negative |
| P56742 | GSCAHDRNPLEECFRETDYE | Negative |
| P56742 | AHDRNPLEECFRETDYEEFL | Negative |
| P56742 | LGSCAHDRNPLEECFRETDY | Negative |
| P56742 | FRETDYEEFLEIAKNGLTAT | Negative |
| P56742 | PLEECFRETDYEEFLEIAKN | Negative |
| P56742 | DRNPLEECFRETDYEEFLEI | Negative |
| P56742 | CAHDRNPLEECFRETDYEEF | Negative |
| P56829 | YLSQRLMLDARENKLLDRM  | Negative |
| P56829 | AFVLSLLMALVLVSYGPGGS | Negative |
| P56829 | SYGPGGSLGCYLSQRLMLDA | Negative |
| P56829 | FVLSLLMALVLVSYGPGGSL | Negative |
| P56829 | GPGGSLGCYLSQRLMLDARE | Negative |
| P56829 | LGCYLSQRLMLDARENKLL  | Negative |
| P56829 | PGGSLGCYLSQRLMLDAREN | Negative |
| P56829 | YGPGGSLGCYLSQRLMLDAR | Negative |
| P56829 | QRLMLDARENKLLDRMNRL  | Negative |
| P56829 | GCYLSQRLMLDARENKLLD  | Negative |
| P56829 | LVLVSYGPGGSLGCYLSQRL | Negative |
| P56829 | SLGCYLSQRLMLDARENLKL | Negative |
| P56829 | VSYGPGGSLGCYLSQRLMLD | Negative |
| P56829 | LMLDARENKLLDRMNRLSP  | Negative |
| P56829 | GSLGCYLSQRLMLDARENLK | Negative |
| P56829 | CYLSQRLMLDARENKLLDR  | Negative |
| P56829 | SLLMALVLVSYGPGGSLGCY | Negative |
| P56829 | LMALVLVSYGPGGSLGCYLS | Negative |
| P56829 | LSLLMALVLVSYGPGGSLGC | Negative |
| P56829 | LLMALVLVSYGPGGSLGCYL | Negative |
| P56829 | SQRLMLDARENKLLDRMNR  | Negative |
| P56829 | LVSYPGGSLGCYLSQRLML  | Negative |
| P56829 | MAFVLSLLMALVLVSYGPGG | Negative |

|        |                      |          |
|--------|----------------------|----------|
| P56829 | VLVSYGPGGSLGCYLSQRLM | Negative |
| P56829 | ALVLVSYGPGGSLGCYLSQR | Negative |
| P56829 | LSQRLMLDARENLKLLDRMN | Negative |
| P56829 | GGSLGCYLSQRLMLDARENL | Negative |
| P56829 | RLMLDARENLKLLDRMNRLS | Negative |
| P56829 | VLSLLMALVLVSYGPGGSLG | Negative |
| P56972 | TALIFLGLIAIAYCGWINEE | Negative |
| P56972 | CGWINEEKIQKKIDERMGNT | Negative |
| P56972 | NEEKIQKKIDERMGNTVLGG | Negative |
| P56972 | ALIFLGLIAIAYCGWINEEK | Negative |
| P56972 | WINEEKIQKKIDERMGNTVL | Negative |
| P56972 | LIAIAYCGWINEEKIQKKID | Negative |
| P56972 | IFLGLIAIAYCGWINEEKIQ | Negative |
| P56972 | YCGWINEEKIQKKIDERMGN | Negative |
| P56972 | QKKIDERMGNTVLGGMAKAI | Negative |
| P56972 | KIQKKIDERMGNTVLGGMAK | Negative |
| P56972 | IAYCGWINEEKIQKKIDERM | Negative |
| P56972 | AYCGWINEEKIQKKIDERMG | Negative |
| P56972 | GWINEEKIQKKIDERMGNTV | Negative |
| P56972 | INEEKIQKKIDERMGNTVLG | Negative |
| P56972 | FLGLIAIAYCGWINEEKIQK | Negative |
| P56972 | LGLIAIAYCGWINEEKIQKK | Negative |
| P56972 | GLIAIAYCGWINEEKIQKKI | Negative |
| P56972 | EKIQKKIDERMGNTVLGGMA | Negative |
| P56972 | KKIDERMGNTVLGGMAKAIV | Negative |
| P56972 | KIDERMGNTVLGGMAKAIVH | Negative |
| P56972 | MNSKLTALIFLGLIAIAYCG | Negative |
| P56972 | NSKLTALIFLGLIAIAYCGW | Negative |
| P56972 | KLTALIFLGLIAIAYCGWIN | Negative |
| P56972 | IQKKIDERMGNTVLGGMAKA | Negative |
| P56972 | LIFLGLIAIAYCGWINEEKI | Negative |
| P56972 | IAIAYCGWINEEKIQKKIDE | Negative |
| P56972 | EEKIQKKIDERMGNTVLGGM | Negative |
| P56972 | SKLTALIFLGLIAIAYCGWI | Negative |
| P56972 | AIAYCGWINEEKIQKKIDER | Negative |
| P58154 | CLACLWIVQACLSLDRADIL | Negative |
| P58154 | QACLSLDRADILYNIRQTSR | Negative |
| P58154 | SLDRADILYNIRQTSRDPVI | Negative |
| P58154 | RRNIFCLACLWIVQACLSLD | Negative |
| P58154 | MRRNIFCLACLWIVQACLSL | Negative |
| P58154 | RNIFCLACLWIVQACLSLDR | Negative |
| P58154 | DILYNIRQTSRDPVIPTQRD | Negative |
| P58154 | RQTSRDPVIPTQRDRPVAVS | Negative |
| P58154 | ADILYNIRQTSRDPVIPTQR | Negative |
| P58154 | LACLWIVQACLSLDRADILY | Negative |
| P58154 | NIFCLACLWIVQACLSLDRA | Negative |

|        |                      |          |
|--------|----------------------|----------|
| P58154 | CLSLDRADILYNIRQTSRPD | Negative |
| P58154 | YNIRQTSRPDVIPTQRDRPV | Negative |
| P58154 | ACLWIVQACLSLDRADILYN | Negative |
| P58154 | LYNIRQTSRPDVIPTQRDRP | Negative |
| P58154 | ACLSLDRADILYNIRQTSRP | Negative |
| P58154 | FCLACLWIVQACLSLDRADI | Negative |
| P58154 | LSLDRADILYNIRQTSRPDV | Negative |
| P58154 | VQACLSLDRADILYNIRQTS | Negative |
| P58154 | LWIVQACLSLDRADILYNIR | Negative |
| P58154 | IVQACLSLDRADILYNIRQT | Negative |
| P58154 | WIVQACLSLDRADILYNIRQ | Negative |
| P58154 | RADILYNIRQTSRPDVIPTQ | Negative |
| P58154 | NIRQTSRPDVIPTQRDRPVA | Negative |
| P58154 | IRQTSRPDVIPTQRDRPVAV | Negative |
| P58154 | CLWIVQACLSLDRADILYNI | Negative |
| P58154 | LDRADILYNIRQTSRPDVIP | Negative |
| P58154 | DRADILYNIRQTSRPDVIPT | Negative |
| P58154 | ILYNIRQTSRPDVIPTQRDR | Negative |
| P58294 | TVSDCAVITGACERDVQCGA | Negative |
| P58294 | LVTVSDCAVITGACERDVQC | Negative |
| P58294 | LLVTVSDCAVITGACERDVQ | Negative |
| P58294 | GATRVSIMLLLVTVSDCAVI | Negative |
| P58294 | DCAVITGACERDVQCGAGTC | Negative |
| P58294 | ACERDVQCGAGTCCAISLWL | Negative |
| P58294 | VSIMLLLVTVSDCAVITGAC | Negative |
| P58294 | SIMLLLVTVSDCAVITGACE | Negative |
| P58294 | ERDVQCGAGTCCAISLWLRG | Negative |
| P58294 | VSDCAVITGACERDVQCGAG | Negative |
| P58294 | RGATRVSIMLLLVTVSDCAV | Negative |
| P58294 | AVITGACERDVQCGAGTCCA | Negative |
| P58294 | ITGACERDVQCGAGTCCAIS | Negative |
| P58294 | SDCAVITGACERDVQCGAGT | Negative |
| P58294 | DVQCGAGTCCAISLWLRGLR | Negative |
| P58294 | VTVSDCAVITGACERDVQCG | Negative |
| P58294 | GACERDVQCGAGTCCAISLW | Negative |
| P58294 | VITGACERDVQCGAGTCCAI | Negative |
| P58294 | TGACERDVQCGAGTCCAISL | Negative |
| P58294 | CERDVQCGAGTCCAISLWLR | Negative |
| P58294 | RVSIMLLLVTVSDCAVITGA | Negative |
| P58294 | CAVITGACERDVQCGAGTCC | Negative |
| P58294 | IMLLLVTVSDCAVITGACER | Negative |
| P58294 | MRGATRVSIMLLLVTVSDCA | Negative |
| P58294 | VQCGAGTCCAISLWLRGLRM | Negative |
| P58294 | MLLLVTVSDCAVITGACERD | Negative |
| P58294 | LLLVTVSDCAVITGACERDV | Negative |
| P58294 | ATRVSIMLLLVTVSDCAVIT | Negative |

|        |                       |          |
|--------|-----------------------|----------|
| P58294 | RDVQCGAGTCCAISLWLRGL  | Negative |
| P58370 | VVTIMCLDLGYTLECKICNF  | Negative |
| P58370 | NFKTCPTDELRHCASETIC   | Negative |
| P58370 | TLLLTLVVVTIMCLDLGYTL  | Negative |
| P58370 | IMCLDLGYTLECKICNFKTC  | Negative |
| P58370 | LTLVVVTIMCLDLGYTLECK  | Negative |
| P58370 | DLGYTLECKICNFKTCPTDE  | Negative |
| P58370 | MKTLLLTLVVVTIMCLDLGY  | Negative |
| P58370 | LECKICNFKTCPTDELRHCA  | Negative |
| P58370 | ECKICNFKTCPTDELRHCA   | Negative |
| P58370 | KICNFKTCPTDELRHCA     | Negative |
| P58370 | KTCPTDELRHCASETICYK   | Negative |
| P58370 | FKTCPTDELRHCASETICY   | Negative |
| P58370 | LLTLVVVTIMCLDLGYTLE   | Negative |
| P58370 | KTLLLTLVVVTIMCLDLGYT  | Negative |
| P58370 | CKICNFKTCPTDELRHCA    | Negative |
| P58370 | LDLGYTLECKICNFKTCPTD  | Negative |
| P58370 | CLDLGYTLECKICNFKTCPT  | Negative |
| P58370 | TIMCLDLGYTLECKICNFKT  | Negative |
| P58370 | VVVVTIMCLDLGYTLECKICN | Negative |
| P58370 | GYTLECKICNFKTCPTDEL   | Negative |
| P58370 | ICNFKTCPTDELRHCA      | Negative |
| P58370 | LVVVVTIMCLDLGYTLECKIC | Negative |
| P58370 | YTLECKICNFKTCPTDEL    | Negative |
| P58370 | VTIMCLDLGYTLECKICNFK  | Negative |
| P58370 | MCLDLGYTLECKICNFKTCP  | Negative |
| P58370 | CNFKTCPTDELRHCA       | Negative |
| P58370 | LGYTLECKICNFKTCPTDEL  | Negative |
| P58370 | LLTLVVVTIMCLDLGYTLE   | Negative |
| P58370 | TLECKICNFKTCPTDEL     | Negative |
| P58738 | GGSCGPPKVPPGNITTNYN   | Negative |
| P58738 | NNIMVVGAVLAALVAGGSCG  | Negative |
| P58738 | GSCGPPKVPPGNITTNYNG   | Negative |
| P58738 | GPPKVPPGNITTNYNGKWL   | Negative |
| P58738 | PPGNITTNYNGKWL        | Negative |
| P58738 | LANNIMVVGAVLAALVAGGS  | Negative |
| P58738 | MVVGAVLAALVAGGSCGPPK  | Negative |
| P58738 | GSLANNIMVVGAVLAALVAG  | Negative |
| P58738 | LAALVAGGSCGPPKVPPGN   | Negative |
| P58738 | ALVAGGSCGPPKVPPGNIT   | Negative |
| P58738 | SCGPPKVPPGNITTNYNGK   | Negative |
| P58738 | AGGSCGPPKVPPGNITTNY   | Negative |
| P58738 | PPKVPPGNITTNYNGKWL    | Negative |
| P58738 | ANNIMVVGAVLAALVAGGSC  | Negative |
| P58738 | VGAVLAALVAGGSCGPPKVP  | Negative |
| P58738 | CGPPKVPPGNITTNYNGKW   | Negative |



|        |                       |          |
|--------|-----------------------|----------|
| P58738 | SLANNIMVVGAVLAALVAGG  | Negative |
| P58738 | VPPGPNITTNYNKGWLTARA  | Negative |
| P58738 | KVPPGPNITTNYNKGWLTAR  | Negative |
| P58738 | MGSLANNIMVVGAVLAALVA  | Negative |
| P58738 | LVAGGSCGPPKVPPGPNITT  | Negative |
| P58738 | NIMVVGAVLAALVAGGSCGP  | Negative |
| P58738 | AALVAGGSCGPPKVPPGPNI  | Negative |
| P58738 | VAGGSCGPPKVPPGPNITTN  | Negative |
| P58738 | IMVVGAVLAALVAGGSCGPP  | Negative |
| P58738 | GAVLAALVAGGSCGPPKVPP  | Negative |
| P58738 | PKVPPGPNITTNYNKGWLTA  | Negative |
| P58738 | AVLAALVAGGSCGPPKVPPG  | Negative |
| P58738 | VLAALVAGGSCGPPKVPPGP  | Negative |
| P58912 | AFVVLTDLGATEDTEKVEVK  | Negative |
| P58912 | VEVKAKPSKTSRGAIGQGF   | Negative |
| P58912 | LGATEDTEKVEVKAKPSKTS  | Negative |
| P58912 | TEDTEKVEVKAKPSKTSRGA  | Negative |
| P58912 | IFLLTAFVVLTDLGATEDTE  | Negative |
| P58912 | DLGATEDTEKVEVKAKPSKT  | Negative |
| P58912 | VVLTDLGATEDTEKVEVKAK  | Negative |
| P58912 | LTDLGATEDTEKVEVKAKPS  | Negative |
| P58912 | TAFVVLTDLGATEDTEKVEV  | Negative |
| P58912 | EKVEVKAKPSKTSRGAIGQG  | Negative |
| P58912 | MSKPIIFLLTAFVVLTDLGA  | Negative |
| P58912 | KVEVKAKPSKTSRGAIGQGF  | Negative |
| P58912 | LTAFAVVLTDLGATEDTEKVE | Negative |
| P58912 | EVKAKPSKTSRGAIGQGFEL  | Negative |
| P58912 | FVVLTDLGATEDTEKVEVKA  | Negative |
| P58912 | TDLGATEDTEKVEVKAKPSK  | Negative |
| P58912 | VLTDLGATEDTEKVEVKAKP  | Negative |
| P58912 | KAKPSKTSRGAIGQGFELHK  | Negative |
| P58912 | SKPIIFLLTAFVVLTDLGAT  | Negative |
| P58912 | IIFLLTAFVVLTDLGATEDT  | Negative |
| P58912 | PIIFLLTAFVVLTDLGATED  | Negative |
| P58912 | DTEKVEVKAKPSKTSRGAIG  | Negative |
| P58912 | GATEDTEKVEVKAKPSKTSR  | Negative |
| P58912 | EDTEKVEVKAKPSKTSRGA   | Negative |
| P58912 | LLTAFVVLTDLGATEDTEKV  | Negative |
| P58912 | TEKVEVKAKPSKTSRGAIGQ  | Negative |
| P58912 | ATEDTEKVEVKAKPSKTSRG  | Negative |
| P58912 | VKAKPSKTSRGAIGQGFELH  | Negative |
| P58912 | KPIIFLLTAFVVLTDLGATE  | Negative |
| P59206 | MKKVRFIFLALLFFLASPEG  | Negative |
| P59206 | AMASDGTWQGKQYLKEDGSQ  | Negative |
| P59206 | GTWQGKQYLKEDGSQAANEW  | Negative |
| P59206 | RFIFLALLFFLASPEGAMAS  | Negative |

|        |                      |          |
|--------|----------------------|----------|
| P59206 | FIFLALLFFLASPEGAMASD | Negative |
| P59206 | GKQYLKEDGSQAANEWVFDT | Negative |
| P59206 | IFLALLFFLASPEGAMASDG | Negative |
| P59206 | ALLFFLASPEGAMASDGTWQ | Negative |
| P59206 | MASDGTWQGKQYLKEDGSQA | Negative |
| P59206 | QGKQYLKEDGSQAANEWVFD | Negative |
| P59206 | LFFLASPEGAMASDGTWQGK | Negative |
| P59206 | ASDGTWQGKQYLKEDGSQAA | Negative |
| P59206 | SDGTWQGKQYLKEDGSQAAN | Negative |
| P59206 | DGTWQGKQYLKEDGSQAANE | Negative |
| P59206 | FLALLFFLASPEGAMASDGT | Negative |
| P59206 | FFLASPEGAMASDGTWQGKQ | Negative |
| P59206 | PEGAMASDGTWQGKQYLKED | Negative |
| P59206 | GAMASDGTWQGKQYLKEDGS | Negative |
| P59206 | FLASPEGAMASDGTWQGKQY | Negative |
| P59206 | VRFIFLALLFFLASPEGAMA | Negative |
| P59206 | LASPEGAMASDGTWQGKQYL | Negative |
| P59206 | LLFFLASPEGAMASDGTWQG | Negative |
| P59206 | ASPEGAMASDGTWQGKQYLK | Negative |
| P59206 | EGAMASDGTWQGKQYLKEDG | Negative |
| P59206 | KVRFIFLALLFFLASPEGAM | Negative |
| P59206 | WQGKQYLKEDGSQAANEWVF | Negative |
| P59206 | TWQGKQYLKEDGSQAANEWV | Negative |
| P59206 | KKVRFIFLALLFFLASPEGA | Negative |
| P59206 | SPEGAMASDGTWQGKQYLKE | Negative |
| P59665 | AAAPEQIAADIPEVVVSLAW | Negative |
| P59665 | ILLVALQAQAEPLQARADEV | Negative |
| P59665 | DEVAAAPEQIAADIPEVVVS | Negative |
| P59665 | ARADEVAAAPEQIAADIPEV | Negative |
| P59665 | AILLVALQAQAEPLQARADE | Negative |
| P59665 | TLAILAAILLVALQAQAEPL | Negative |
| P59665 | AQAEPLQARADEVAAAPEQI | Negative |
| P59665 | MRTLAILAAILLVALQAQAE | Negative |
| P59665 | EVAAAPEQIAADIPEVVVSL | Negative |
| P59665 | VALQAQAEPLQARADEVAAA | Negative |
| P59665 | EPLQARADEVAAAPEQIAAD | Negative |
| P59665 | LAAILLVALQAQAEPLQARA | Negative |
| P59665 | VAAAPEQIAADIPEVVVSLA | Negative |
| P59665 | QARADEVAAAPEQIAADIPE | Negative |
| P59665 | LAILAAILLVALQAQAEPLQ | Negative |
| P59665 | PLQARADEVAAAPEQIAADI | Negative |
| P59665 | QAQAEPLQARADEVAAAPEQ | Negative |
| P59665 | QAEPLQARADEVAAAPEQIA | Negative |
| P59665 | LQARADEVAAAPEQIAADIP | Negative |
| P59665 | LLVALQAQAEPLQARADEVA | Negative |
| P59665 | LVALQAQAEPLQARADEVAA | Negative |

|        |                          |          |
|--------|--------------------------|----------|
| P59665 | LQAQAEPLQARADEVAAAPE     | Negative |
| P59665 | RTLAILAAILLVALQAQAEPLQAR | Negative |
| P59665 | ILAAILLVALQAQAEPLQAR     | Negative |
| P59665 | AAILLVALQAQAEPLQARAD     | Negative |
| P59665 | RADEVAAAPEQIAADIPEVV     | Negative |
| P59665 | ALQAQAEPLQARADEVAAAP     | Negative |
| P59665 | AEPLQARADEVAAAPEQIAA     | Negative |
| P59665 | ADEVAAAPEQIAADIPEVVV     | Negative |
| P59807 | TSNPAFDPKNLMQSEIYHFA     | Negative |
| P59807 | RFTALAMTLGLLSAPYNAMA     | Negative |
| P59807 | ALAMTLGLLSAPYNAMAATS     | Negative |
| P59807 | IFRFTALAMTLGLLSAPYNA     | Negative |
| P59807 | PAFDPKNLMQSEIYHFAQNN     | Negative |
| P59807 | AFDPKNLMQSEIYHFAQNNP     | Negative |
| P59807 | AATSNPAFDPKNLMQSEIYH     | Negative |
| P59807 | PYNAMAATSNPAFDPKNLMQ     | Negative |
| P59807 | LSAPYNAMAATSNPAFDPKN     | Negative |
| P59807 | APYNAMAATSNPAFDPKNLM     | Negative |
| P59807 | TALAMTLGLLSAPYNAMAAT     | Negative |
| P59807 | LLSAPYNAMAATSNPAFDPK     | Negative |
| P59807 | FRFTALAMTLGLLSAPYNAM     | Negative |
| P59807 | MAATSNPAFDPKNLMQSEIY     | Negative |
| P59807 | YNAMAATSNPAFDPKNLMQS     | Negative |
| P59807 | SAPYNAMAATSNPAFDPKNL     | Negative |
| P59807 | GLLSAPYNAMAATSNPAFDP     | Negative |
| P59807 | MPIFRFTALAMTLGLLSAPY     | Negative |
| P59807 | FTALAMTLGLLSAPYNAMAA     | Negative |
| P59807 | LGLLSAPYNAMAATSNPAFD     | Negative |
| P59807 | SNPAFDPKNLMQSEIYHFAQ     | Negative |
| P59807 | NPAFDPKNLMQSEIYHFAQN     | Negative |
| P59807 | LAMTLGLLSAPYNAMAATSN     | Negative |
| P59807 | PIFRFTALAMTLGLLSAPYN     | Negative |
| P59807 | TLGLLSAPYNAMAATSNPAF     | Negative |
| P59807 | AMAATSNPAFDPKNLMQSEI     | Negative |
| P59807 | MTLGLLSAPYNAMAATSNPA     | Negative |
| P59807 | ATSNPAFDPKNLMQSEIYHF     | Negative |
| P59807 | NAMAATSNPAFDPKNLMQSE     | Negative |
| P60042 | ALAALCIVLALGGVTGAPSD     | Negative |
| P60042 | VLALGGVTGAPSDPRLRQFL     | Negative |
| P60042 | SDPRLRQFLQKSLAAATGKQ     | Negative |
| P60042 | LALGGVTGAPSDPRLRQFLQ     | Negative |
| P60042 | PSDPRLRQFLQKSLAAATGK     | Negative |
| P60042 | CALAALCIVLALGGVTGAPS     | Negative |
| P60042 | TGAPSDPRLRQFLQKSLAAA     | Negative |
| P60042 | DPRLRQFLQKSLAAATGKQE     | Negative |
| P60042 | CRLQCALAALCIVLALGGVT     | Negative |

|        |                      |          |
|--------|----------------------|----------|
| P60042 | ALCIVLALGGVTGAPSDPRL | Negative |
| P60042 | LQCALAALCIVLALGGVTGA | Negative |
| P60042 | SCRLQCALAALCIVLALGGV | Negative |
| P60042 | VTGAPSDPRLRQFLQKSLAA | Negative |
| P60042 | CIVLALGGVTGAPSDPRLRQ | Negative |
| P60042 | LSCRLQCALAALCIVLALGG | Negative |
| P60042 | PRLRQFLQKSLAAATGKQEL | Negative |
| P60042 | AALCIVLALGGVTGAPSDPR | Negative |
| P60042 | GVTGAPSDPRLRQFLQKSLA | Negative |
| P60042 | MLSCRLQCALAALCIVLALG | Negative |
| P60042 | IVLALGGVTGAPSDPRLRQF | Negative |
| P60042 | GAPSDPRLRQFLQKSLAAAT | Negative |
| P60042 | QCALAALCIVLALGGVTGAP | Negative |
| P60042 | ALGGVTGAPSDPRLRQFLQK | Negative |
| P60042 | RLQCALAALCIVLALGGVTG | Negative |
| P60042 | RLRQFLQKSLAAATGKQELA | Negative |
| P60042 | GGVTGAPSDPRLRQFLQKSL | Negative |
| P60042 | APSDPRLRQFLQKSLAAATG | Negative |
| P60042 | LCIVLALGGVTGAPSDPRLR | Negative |
| P60042 | LGGVTGAPSDPRLRQFLQKS | Negative |
| P60153 | LLPQQLQLVQFQEVDTFD   | Negative |
| P60153 | VDTDFDFPEEDKKEEFEECL | Negative |
| P60153 | QQLQLVQFQEVDTFDFPE   | Negative |
| P60153 | LLLLPQQLQLVQFQEVDTD  | Negative |
| P60153 | QEVDTFDFPEEDKKEEFEE  | Negative |
| P60153 | PQQLQLVQFQEVDTFDFP   | Negative |
| P60153 | VQFQEVDTFDFPEEDKKEE  | Negative |
| P60153 | QLQLVQFQEVDTFDFPEE   | Negative |
| P60153 | ITTHPLPLLLLPQQLQLVQ  | Negative |
| P60153 | LPQQLQLVQFQEVDTFDF   | Negative |
| P60153 | QLVQFQEVDTFDFPEEDKK  | Negative |
| P60153 | LPLLLLPQQLQLVQFQEVD  | Negative |
| P60153 | LLLPQQLQLVQFQEVDTF   | Negative |
| P60153 | FQEVDTFDFPEEDKKEEFE  | Negative |
| P60153 | THPLPLLLLPQQLQLVQFQ  | Negative |
| P60153 | MMRTLITTHPLPLLLLPQQL | Negative |
| P60153 | RTLITTHPLPLLLLPQQLQ  | Negative |
| P60153 | HPLPLLLLPQQLQLVQFQE  | Negative |
| P60153 | DTDFDFPEEDKKEEFEECLE | Negative |
| P60153 | LLQLVQFQEVDTFDFPEED  | Negative |
| P60153 | PLPLLLLPQQLQLVQFQEV  | Negative |
| P60153 | EVDTFDFPEEDKKEEFEEC  | Negative |
| P60153 | QFQEVDTFDFPEEDKKEEF  | Negative |
| P60153 | LITTHPLPLLLLPQQLQLV  | Negative |
| P60153 | TTHPLPLLLLPQQLQLVQF  | Negative |
| P60153 | MRTLITTHPLPLLLLPQQL  | Negative |

|        |                       |          |
|--------|-----------------------|----------|
| P60153 | LVQFQEVDTDDFDFPEEDKKE | Negative |
| P60153 | LQLVQFQEVDTDDFDFPEEDK | Negative |
| P60153 | TLITTHPLPLLLLPQQLQL   | Negative |
| P60212 | IGTVVECNKDGYLEMGDGCK  | Negative |
| P60212 | EGDGCKMGCLTRKASYCVDQ  | Negative |
| P60212 | FVLFISCFFLIGTVVECNKD  | Negative |
| P60212 | FISCFFLIGTVVECNKDGYL  | Negative |
| P60212 | ISCFFLIGTVVECNKDGYLEM | Negative |
| P60212 | GDGCKMGCLTRKASYCVDQC  | Negative |
| P60212 | DGYLMEGDGCKMGCLTRKAS  | Negative |
| P60212 | VECNKDGYLEMGDGCKMGCL  | Negative |
| P60212 | DGCKMGCLTRKASYCVDQCK  | Negative |
| P60212 | RFVLFISCFFLIGTVVECNK  | Negative |
| P60212 | YLMEGDGCKMGCLTRKASYC  | Negative |
| P60212 | ECNKDGYLEMGDGCKMGCLT  | Negative |
| P60212 | GTVVECNKDGYLEMGDGCKM  | Negative |
| P60212 | SCFFLIGTVVECNKDGYLEM  | Negative |
| P60212 | VLFISCFFLIGTVVECNKDG  | Negative |
| P60212 | NKDGYLEMGDGCKMGCLTRK  | Negative |
| P60212 | CNKDGYLEMGDGCKMGCLTR  | Negative |
| P60212 | KDGYLEMGDGCKMGCLTRKA  | Negative |
| P60212 | FFLIGTVVECNKDGYLEMGD  | Negative |
| P60212 | VVECNKDGYLEMGDGCKMGC  | Negative |
| P60212 | MIRFVLFISCFFLIGTVVEC  | Negative |
| P60212 | CFFLIGTVVECNKDGYLEMG  | Negative |
| P60212 | FLIGTVVECNKDGYLEMGDG  | Negative |
| P60212 | MEGDGCKMGCLTRKASYCVD  | Negative |
| P60212 | IRFVLFISCFFLIGTVVECN  | Negative |
| P60212 | LMEGDGCKMGCLTRKASYCV  | Negative |
| P60212 | TVVECNKDGYLEMGDGCKMG  | Negative |
| P60212 | GYLEMGDGCKMGCLTRKASY  | Negative |
| P60212 | LIGTVVECNKDGYLEMGDGC  | Negative |
| P60213 | MTRFVLFISCFVIGMVVEC   | Negative |
| P60213 | DGCKYNCLTRPGHYCANES   | Negative |
| P60213 | LVGNDGCKYNCLTRPGHYCA  | Negative |
| P60213 | VIGMVVECKDGYLVGNDGCK  | Negative |
| P60213 | CFFVIGMVVECKDGYLVGND  | Negative |
| P60213 | FVLFISCFVIGMVVECKDG   | Negative |
| P60213 | DGYLVGNDGCKYNCLTRPGH  | Negative |
| P60213 | RFVLFISCFVIGMVVECKD   | Negative |
| P60213 | FISCFVIGMVVECKDGYLV   | Negative |
| P60213 | GylvGNDGCKYNCLTRPGHY  | Negative |
| P60213 | GNDGCKYNCLTRPGHYCANE  | Negative |
| P60213 | VECKDGYLVGNDGCKYNCLT  | Negative |
| P60213 | TRFVLFISCFVIGMVVECK   | Negative |
| P60213 | ISCFVIGMVVECKDGYLVG   | Negative |

|        |                      |          |
|--------|----------------------|----------|
| P60213 | KDGYLVGNDGCKYNCLTRPG | Negative |
| P60213 | ECKDGYLVGNDGCKYNCLTR | Negative |
| P60213 | MVVECKDGYLVGNDGCKYNC | Negative |
| P60213 | CKDGYLVGNDGCKYNCLTRP | Negative |
| P60213 | FVIGMVVECKDGYLVGNDGC | Negative |
| P60213 | VGNDGCKYNCLTRPGHYCAN | Negative |
| P60213 | VVECKDGYLVGNDGCKYNCL | Negative |
| P60213 | NDGCKYNCLTRPGHYCANEC | Negative |
| P60213 | FFVIGMVVECKDGYLVGNDG | Negative |
| P60213 | GMVVECKDGYLVGNDGCKYN | Negative |
| P60213 | YLVGNDGCKYNCLTRPGHYC | Negative |
| P60213 | IGMVVECKDGYLVGNDGCKY | Negative |
| P60213 | VLFISCFVIGMVVECKDGY  | Negative |
| P60213 | SCFFVIGMVVECKDGYLVGN | Negative |
| P60213 | GCKYNCLTRPGHYCANEC   | Negative |
| P60214 | DMIVECKKEGYLVGNDGCKY | Negative |
| P60214 | NDGCKYGCITRPHQYCVHEC | Negative |
| P60214 | YLVGNDGCKYGCITRPHQYC | Negative |
| P60214 | VECKKEGYLVGNDGCKYGC  | Negative |
| P60214 | VLFISCFFLIDMIVECKKEG | Negative |
| P60214 | LVGNDGCKYGCITRPHQYCV | Negative |
| P60214 | KEGYLVGNDGCKYGCITRPH | Negative |
| P60214 | MTRFVLFISCFFLIDMIVEC | Negative |
| P60214 | FISCFFLIDMIVECKKEGYL | Negative |
| P60214 | IVECKKEGYLVGNDGCKYGC | Negative |
| P60214 | ECKKEGYLVGNDGCKYGCIT | Negative |
| P60214 | EGYLVGNDGCKYGCITRPHQ | Negative |
| P60214 | SCFFLIDMIVECKKEGYLVG | Negative |
| P60214 | MIVECKKEGYLVGNDGCKYG | Negative |
| P60214 | CFFLIDMIVECKKEGYLVGN | Negative |
| P60214 | LIDMIVECKKEGYLVGNDGC | Negative |
| P60214 | GNDGCKYGCITRPHQYCVHE | Negative |
| P60214 | IDMIVECKKEGYLVGNDGCK | Negative |
| P60214 | FLIDMIVECKKEGYLVGNDG | Negative |
| P60214 | RFVLFISCFFLIDMIVECKK | Negative |
| P60214 | TRFVLFISCFFLIDMIVECK | Negative |
| P60214 | FVLFISCFFLIDMIVECKKE | Negative |
| P60214 | GYLVGNDGCKYGCITRPHQY | Negative |
| P60214 | VGNDGCKYGCITRPHQYCVH | Negative |
| P60214 | KKEGYLVGNDGCKYGCITRP | Negative |
| P60214 | CKKEGYLVGNDGCKYGCITR | Negative |
| P60214 | FFLIDMIVECKKEGYLVGND | Negative |
| P60214 | ISCFFLIDMIVECKKEGYLV | Negative |
| P60214 | DGCKYGCITRPHQYCVHECE | Negative |
| P60215 | TRFVLFISCFFLIGMIVECK | Negative |
| P60215 | ISCFFLIGMIVECKDGYLME | Negative |

|        |                       |          |
|--------|-----------------------|----------|
| P60215 | FLIGMIVECKDGYLMEYGGC  | Negative |
| P60215 | MIVECKDGYLMEYGGCKMSC  | Negative |
| P60215 | FISCFFLIGMIVECKDGYLM  | Negative |
| P60215 | MTRFVLFISCFFLIGMIVEC  | Negative |
| P60215 | FFLIGMIVECKDGYLMEYGG  | Negative |
| P60215 | EYGGCKMSCLMKKGTFCAE   | Negative |
| P60215 | VECKDGYLMEYGGCKMSCLM  | Negative |
| P60215 | YGGCKMSCLMKKGTFCAE    | Negative |
| P60215 | CKDGYLMEYGGCKMSCLM    | Negative |
| P60215 | KDGYLMEYGGCKMSCLM     | Negative |
| P60215 | IVECKDGYLMEYGGCKMSCL  | Negative |
| P60215 | ECKDGYLMEYGGCKMSCLM   | Negative |
| P60215 | FVLFISCFFLIGMIVECKDG  | Negative |
| P60215 | GGCKMSCLMKKGTFCAE     | Negative |
| P60215 | SCFFLIGMIVECKDGYLMEY  | Negative |
| P60215 | GMIVECKDGYLMEYGGCKMS  | Negative |
| P60215 | YLMEYGGCKMSCLMKKGTFC  | Negative |
| P60215 | VLFISCFFLIGMIVECKDGY  | Negative |
| P60215 | GCKMSCLMKKGTFCAE      | Negative |
| P60215 | RFVLFISCFFLIGMIVECKD  | Negative |
| P60215 | CFFLIGMIVECKDGYLMEYG  | Negative |
| P60215 | LMEYGGCKMSCLMKKGTFC   | Negative |
| P60215 | IGMIVECKDGYLMEYGGCKM  | Negative |
| P60215 | DGYLMEYGGCKMSCLM      | Negative |
| P60215 | LIGMIVECKDGYLMEYGGCK  | Negative |
| P60215 | GYLMEYGGCKMSCLM       | Negative |
| P60215 | MEYGGCKMSCLMKKGTFC    | Negative |
| P60302 | MKTLLTLVVVTIVCLDLGY   | Negative |
| P60302 | LVPLFYKTCPAGKNLCYKMF  | Negative |
| P60302 | LLTLVVVTIVCLDLGYTLKC  | Negative |
| P60302 | LFYKTCPAGKNLCYKMFMVA  | Negative |
| P60302 | TIVCLDLGYTLKCNKLVPLF  | Negative |
| P60302 | NKLVPLFYKTCPAGKNLCYK  | Negative |
| P60302 | TLLLTLVVVTIVCLDLGYTL  | Negative |
| P60302 | KCNKLVPLFYKTCPAGKNLC  | Negative |
| P60302 | LGYTLCNKLVPLFYKTCPA   | Negative |
| P60302 | VVTIVCLDLGYTLKCNKLVPL | Negative |
| P60302 | DLGYTLKCNKLVPLFYKTCP  | Negative |
| P60302 | KLVPFYKTCPAGKNLCYKM   | Negative |
| P60302 | CNKLVPLFYKTCPAGKNLCY  | Negative |
| P60302 | TLKCNKLVPLFYKTCPAGKN  | Negative |
| P60302 | IVCLDLGYTLKCNKLVPLFY  | Negative |
| P60302 | VTIVCLDLGYTLKCNKLVPL  | Negative |
| P60302 | GYTLKCNKLVPLFYKTCPAG  | Negative |
| P60302 | LDLGYTLKCNKLVPLFYKTC  | Negative |
| P60302 | KTLLLTLVVVTIVCLDLGYT  | Negative |

|        |                       |          |
|--------|-----------------------|----------|
| P60302 | YTLKCNKLVPLFYKTCPAGK  | Negative |
| P60302 | VCLDLGYTLKCNKLVPLFYK  | Negative |
| P60302 | PLFYKTCPAGKNLCYKMFMV  | Negative |
| P60302 | LKCNKLVPLFYKTCPAGKNL  | Negative |
| P60302 | LLTLVVVTIVCLDLGYTLK   | Negative |
| P60302 | LVVVVTIVCLDLGYTLKCNKL | Negative |
| P60302 | VVVVTIVCLDLGYTLKCNKLV | Negative |
| P60302 | CLDLGYTLKCNKLVPLFYKT  | Negative |
| P60302 | VPLFYKTCPAGKNLCYKMFM  | Negative |
| P60302 | LTLVVVTIVCLDLGYTLKCN  | Negative |
| P60568 | TNSAPTSSSTKKTQLQLEHL  | Negative |
| P60568 | SAPTSSSTKKTQLQLEHLLL  | Negative |
| P60568 | PTSSSTKKTQLQLEHLLLDL  | Negative |
| P60568 | SCIALSLALVTNSAPTSSST  | Negative |
| P60568 | ALVTNSAPTSSSTKKTQLQL  | Negative |
| P60568 | QLLSCIALSLALVTNSAPTS  | Negative |
| P60568 | SSSTKKTQLQLEHLLLDLQM  | Negative |
| P60568 | MQLLSCIALSLALVTNSAPT  | Negative |
| P60568 | TQLQLEHLLLDLQMILNGIN  | Negative |
| P60568 | KTQLQLEHLLLDLQMILNGI  | Negative |
| P60568 | LALVTNSAPTSSSTKKTQLQ  | Negative |
| P60568 | TKKTQLQLEHLLLDLQMILN  | Negative |
| P60568 | RMQLLSCIALSLALVTNSAP  | Negative |
| P60568 | SLALVTNSAPTSSSTKKTQL  | Negative |
| P60568 | TSSSTKKTQLQLEHLLLDLQ  | Negative |
| P60568 | NSAPTSSSTKKTQLQLEHLL  | Negative |
| P60568 | MYRMQLLSCIALSLALVTNS  | Negative |
| P60568 | IALSLALVTNSAPTSSSTKK  | Negative |
| P60568 | KKTQLQLEHLLLDLQMILNG  | Negative |
| P60568 | LVTNSAPTSSSTKKTQLQLE  | Negative |
| P60568 | YRMQLLSCIALSLALVTNSA  | Negative |
| P60568 | CIALSLALVTNSAPTSSSTK  | Negative |
| P60568 | LSLALVTNSAPTSSSTKKTQ  | Negative |
| P60568 | LSCIALSLALVTNSAPTSSS  | Negative |
| P60568 | ALSLALVTNSAPTSSSTKKT  | Negative |
| P60568 | APTSSSTKKTQLQLEHLLLD  | Negative |
| P60568 | STKKTQLQLEHLLLDLQMIL  | Negative |
| P60568 | SSTKKTQLQLEHLLLDLQMI  | Negative |
| P60568 | VTNSAPTSSSTKKTQLQLEH  | Negative |
| P60616 | ATSPISAVTCPPGENLCYRK  | Negative |
| P60616 | VTIVCLDLGYTIVCHTTATS  | Negative |
| P60616 | TLLTLVVVTIVCLDLGYTI   | Negative |
| P60616 | SPISAVTCPPGENLCYRKMW  | Negative |
| P60616 | TIVCLDLGYTIVCHTTATSP  | Negative |
| P60616 | LLTLVVVTIVCLDLGYTIVC  | Negative |
| P60616 | TTATSPISAVTCPPGENLCY  | Negative |



|        |                       |          |
|--------|-----------------------|----------|
| P60616 | VVVTIVCLDLGYTIVCHTTA  | Negative |
| P60616 | LDLGYTIVCHTTATSPISAV  | Negative |
| P60616 | TATSPISAVTCPPGENLCYR  | Negative |
| P60616 | VCLDLGYTIVCHTTATSPIS  | Negative |
| P60616 | VCHTTATSPISAVTCPPGEN  | Negative |
| P60616 | VVTIVCLDLGYTIVCHTTAT  | Negative |
| P60616 | IVCHTTATSPISAVTCPPGE  | Negative |
| P60616 | TIVCHTTATSPISAVTCPPG  | Negative |
| P60616 | LVVVTIVCLDLGYTIVCHTT  | Negative |
| P60616 | MKTLLLTLLVVVTIVCLDLGY | Negative |
| P60616 | CLDLGYTIVCHTTATSPISA  | Negative |
| P60616 | LLLTLVVVTIVCLDLGYTIV  | Negative |
| P60616 | DLGYTIVCHTTATSPISAVT  | Negative |
| P60616 | LGYTIVCHTTATSPISAVTC  | Negative |
| P60616 | GYTIVCHTTATSPISAVTCP  | Negative |
| P60616 | TSPISAVTCPPGENLCYRKM  | Negative |
| P60616 | LTLLVVVTIVCLDLGYTIVCH | Negative |
| P60616 | IVCLDLGYTIVCHTTATSPI  | Negative |
| P60616 | YTIVCHTTATSPISAVTCPP  | Negative |
| P60616 | HTTATSPISAVTCPPGENLC  | Negative |
| P60616 | KTLLLTLLVVVTIVCLDLGYT | Negative |
| P60616 | CHTTATSPISAVTCPPGENL  | Negative |
| P60770 | NQQSSQTPTTTGCSGGETNC  | Negative |
| P60770 | IVCLDLGYTLECHNQQSSQT  | Negative |
| P60770 | SSQTPTTTGCSGGETNCYKK  | Negative |
| P60770 | SQTPTTTGCSGGETNCYKKR  | Negative |
| P60770 | VVTIVCLDLGYTLECHNQQS  | Negative |
| P60770 | VCLDLGYTLECHNQQSSQTP  | Negative |
| P60770 | VTIVCLDLGYTLECHNQQSS  | Negative |
| P60770 | CHNQQSSQTPTTTGCSGGET  | Negative |
| P60770 | LGYTLECHNQQSSQTPTTTG  | Negative |
| P60770 | DLGYTLECHNQQSSQTPTTT  | Negative |
| P60770 | TLLLTLLVVVTIVCLDLGYTL | Negative |
| P60770 | LTLLVVVTIVCLDLGYTLECH | Negative |
| P60770 | LVVTIVCLDLGYTLECHNQQ  | Negative |
| P60770 | KTLLLTLLVVVTIVCLDLGYT | Negative |
| P60770 | LLTLLVVVTIVCLDLGYTLEC | Negative |
| P60770 | MKTLLLTLLVVVTIVCLDLGY | Negative |
| P60770 | GYTLECHNQQSSQTPTTTGC  | Negative |
| P60770 | TIVCLDLGYTLECHNQQSSQ  | Negative |
| P60770 | LDLGYTLECHNQQSSQTPTT  | Negative |
| P60770 | LECHNQQSSQTPTTTGCSGG  | Negative |
| P60770 | LLVVVTIVCLDLGYTLECHNQ | Negative |
| P60770 | LLLTLLVVVTIVCLDLGYTLE | Negative |
| P60770 | YTLECHNQQSSQTPTTTGCS  | Negative |
| P60770 | QQSSQTPTTTGCSGGETNCY  | Negative |

|        |                      |          |
|--------|----------------------|----------|
| P60770 | TLECHNQSSQTPTTTGCSG  | Negative |
| P60770 | QSSQTPTTTGCSGGETNCYK | Negative |
| P60770 | ECHNQSSQTPTTTGCSGGE  | Negative |
| P60770 | HNQQSSQTPTTTGCSGGETN | Negative |
| P60770 | CLDLGYTLECHNQSSQTPT  | Negative |
| P61153 | NTARWAATLGLTATAVCGPL | Negative |
| P61153 | GASLASPATAPASLYAPSAL | Negative |
| P61153 | PATAPASLYAPSALVLTVGH | Negative |
| P61153 | TARWAATLGLTATAVCGPLA | Negative |
| P61153 | RNTARWAATLGLTATAVCGP | Negative |
| P61153 | ASPATAPASLYAPSALVLT  | Negative |
| P61153 | TLGLTATAVCGPLAGASLAS | Negative |
| P61153 | LAGASLASPATAPASLYAPS | Negative |
| P61153 | ARWAATLGLTATAVCGPLAG | Negative |
| P61153 | LTATAVCGPLAGASLASPAT | Negative |
| P61153 | ATLGLTATAVCGPLAGASLA | Negative |
| P61153 | LASPATAPASLYAPSALVLT | Negative |
| P61153 | AVCGPLAGASLASPATAPAS | Negative |
| P61153 | ATAVCGPLAGASLASPATAP | Negative |
| P61153 | ASLASPATAPASLYAPSALV | Negative |
| P61153 | GPLAGASLASPATAPASLYA | Negative |
| P61153 | TATAVCGPLAGASLASPATA | Negative |
| P61153 | WAATLGLTATAVCGPLAGAS | Negative |
| P61153 | SLASPATAPASLYAPSALVL | Negative |
| P61153 | AATLGLTATAVCGPLAGASL | Negative |
| P61153 | TAVCGPLAGASLASPATAPA | Negative |
| P61153 | VCGPLAGASLASPATAPASL | Negative |
| P61153 | AGASLASPATAPASLYAPSA | Negative |
| P61153 | SPATAPASLYAPSALVLTVG | Negative |
| P61153 | RWAATLGLTATAVCGPLAGA | Negative |
| P61153 | LGLTATAVCGPLAGASLASP | Negative |
| P61153 | CGPLAGASLASPATAPASLY | Negative |
| P61153 | MRNTARWAATLGLTATAVCG | Negative |
| P61153 | GLTATAVCGPLAGASLASPA | Negative |
| P61312 | LMVTVTFGCISLLYLLPGTL | Negative |
| P61312 | VTVTFGCISLLYLLPGTSLG | Negative |
| P61312 | LSGSLGKGLRPREPPAKIPS | Negative |
| P61312 | GCISLLYLLPGTSLGSLGKG | Negative |
| P61312 | LLMVTVTFGCISLLYLLPGT | Negative |
| P61312 | MVTVTFGCISLLYLLPGTSL | Negative |
| P61312 | QLLMVTVTFGCISLLYLLPG | Negative |
| P61312 | TFGCISLLYLLPGTSLGSLG | Negative |
| P61312 | LLPGTSLGSLGKGLRPREPP | Negative |
| P61312 | SLLYLLPGTSLGSLGKGLRP | Negative |
| P61312 | YLLPGTSLGSLGKGLRPREP | Negative |
| P61312 | SGSLGKGLRPREPPAKIPSS | Negative |

|        |                       |          |
|--------|-----------------------|----------|
| P61312 | GTLSGSLGKGLRPREPPAKI  | Negative |
| P61312 | KGLRPREPPAKIPSSGPQPG  | Negative |
| P61312 | ISLLYLLPGTSLSGSLGKGLR | Negative |
| P61312 | LLYLLPGTSLSGSLGKGLRPR | Negative |
| P61312 | LGKGLRPREPPAKIPSSGPQ  | Negative |
| P61312 | GSLGKGLRPREPPAKIPSSG  | Negative |
| P61312 | LYLLPGTSLSGSLGKGLRPRE | Negative |
| P61312 | LPGTSLSGSLGKGLRPREPPA | Negative |
| P61312 | VTFGCISLLYLLPGTSLGSL  | Negative |
| P61312 | PGTSLSGSLGKGLRPREPPAK | Negative |
| P61312 | TLSGSLGKGLRPREPPAKIP  | Negative |
| P61312 | CISLLYLLPGTSLSGSLGKGL | Negative |
| P61312 | AQLLMVTVTFGCISLLYLLP  | Negative |
| P61312 | MAQLLMVTVTFGCISLLYLL  | Negative |
| P61312 | SLGKGLRPREPPAKIPSSGP  | Negative |
| P61312 | TVTFGCISLLYLLPGTSLGS  | Negative |
| P61312 | GKGLRPREPPAKIPSSGPQP  | Negative |
| P61316 | AASDLKSRLDKVSSFHASFT  | Negative |
| P61316 | SVWADAASDLKSRLDKVSSF  | Negative |
| P61316 | SLVASSVWADAASDLKSRLD  | Negative |
| P61316 | SRLDKVSSFHASFTQKVTDG  | Negative |
| P61316 | WADAASDLKSRLDKVSSFHA  | Negative |
| P61316 | SSLVASSVWADAASDLKSRL  | Negative |
| P61316 | ASDLKSRLDKVSSFHASFTQ  | Negative |
| P61316 | ASSVWADAASDLKSRLDKVS  | Negative |
| P61316 | KIAITCALLSSLVASSVWAD  | Negative |
| P61316 | CALLSSLVASSVWADAASDL  | Negative |
| P61316 | LVASSVWADAASDLKSRLDK  | Negative |
| P61316 | ITCALLSSLVASSVWADAAS  | Negative |
| P61316 | ADAASDLKSRLDKVSSFHAS  | Negative |
| P61316 | IAITCALLSSLVASSVWADA  | Negative |
| P61316 | LKSRLDKVSSFHASFTQKVT  | Negative |
| P61316 | ALLSSLVASSVWADAASDLK  | Negative |
| P61316 | SSVWADAASDLKSRLDKVSS  | Negative |
| P61316 | LLSSLVASSVWADAASDLKS  | Negative |
| P61316 | VASSVWADAASDLKSRLDKV  | Negative |
| P61316 | RLDKVSSFHASFTQKVTGDS  | Negative |
| P61316 | DLKSRLDKVSSFHASFTQKV  | Negative |
| P61316 | DAASDLKSRLDKVSSFHASF  | Negative |
| P61316 | MKKIAITCALLSSLVASSVW  | Negative |
| P61316 | AITCALLSSLVASSVWADAA  | Negative |
| P61316 | VWADAASDLKSRLDKVSSFH  | Negative |
| P61316 | KKIAITCALLSSLVASSVWA  | Negative |
| P61316 | SDLKSRLDKVSSFHASFTQK  | Negative |
| P61316 | KSRLDKVSSFHASFTQKVTD  | Negative |
| P61316 | LSSLVASSVWADAASDLKSR  | Negative |

|        |                      |          |
|--------|----------------------|----------|
| P61626 | TVQGKVFERCELARTLKRLG | Negative |
| P61626 | GKVFERCELARTLKRLGMDG | Negative |
| P61626 | MKALIVLGLVLLSVTVQGKV | Negative |
| P61626 | VQGKVFERCELARTLKRLGM | Negative |
| P61626 | RCELARTLKRLGMDGYRGIS | Negative |
| P61626 | LKRLGMDGYRGISLANWMCL | Negative |
| P61626 | LSVTVQGKVFERCELARTLK | Negative |
| P61626 | VLGLVLLSVTVQGKVFERCE | Negative |
| P61626 | ALIVLGLVLLSVTVQGKVFE | Negative |
| P61626 | GLVLLSVTVQGKVFERCELA | Negative |
| P61626 | RTLKRLGMDGYRGISLANWM | Negative |
| P61626 | VLLSVTVQGKVFERCELART | Negative |
| P61626 | IVLGLVLLSVTVQGKVFERC | Negative |
| P61626 | FERCELARTLKRLGMDGYRG | Negative |
| P61626 | LGLVLLSVTVQGKVFERCEL | Negative |
| P61626 | CELARTLKRLGMDGYRGISL | Negative |
| P61626 | LVLLSVTVQGKVFERCELAR | Negative |
| P61626 | ARTLKRLGMDGYRGISLANW | Negative |
| P61626 | TLKRLGMDGYRGISLANWMC | Negative |
| P61626 | KALIVLGLVLLSVTVQGKVF | Negative |
| P61626 | KVFERCELARTLKRLGMDGY | Negative |
| P61626 | ELARTLKRLGMDGYRGISLA | Negative |
| P61626 | LLSVTVQGKVFERCELARTL | Negative |
| P61626 | SVTVQGKVFERCELARTLKR | Negative |
| P61626 | QGKVFERCELARTLKRLGMD | Negative |
| P61626 | LARTLKRLGMDGYRGISLAN | Negative |
| P61626 | VFERCELARTLKRLGMDGYR | Negative |
| P61626 | ERCELARTLKRLGMDGYRGI | Negative |
| P61626 | VTVQGKVFERCELARTLKRL | Negative |
| P61629 | IFERCELARTLKRLGLDGYR | Negative |
| P61629 | VTVQGKIFERCELARTLKRL | Negative |
| P61629 | TLKRLGLDGYRGISLANWVC | Negative |
| P61629 | KAVIILGLVLLSVTVQGKIF | Negative |
| P61629 | GKIFERCELARTLKRLGLDG | Negative |
| P61629 | LKRLGLDGYRGISLANWVCL | Negative |
| P61629 | ERCELARTLKRLGLDGYRGI | Negative |
| P61629 | QGKIFERCELARTLKRLGLD | Negative |
| P61629 | RCELARTLKRLGLDGYRGIS | Negative |
| P61629 | LSVTVQGKIFERCELARTLK | Negative |
| P61629 | TVQGKIFERCELARTLKRLG | Negative |
| P61629 | ARTLKRLGLDGYRGISLANW | Negative |
| P61629 | LVLLSVTVQGKIFERCELAR | Negative |
| P61629 | CELARTLKRLGLDGYRGISL | Negative |
| P61629 | FERCELARTLKRLGLDGYRG | Negative |
| P61629 | VLLSVTVQGKIFERCELART | Negative |
| P61629 | GLVLLSVTVQGKIFERCELA | Negative |

|        |                       |          |
|--------|-----------------------|----------|
| P61629 | MKAVIILGLVLLSVTVQGKI  | Negative |
| P61629 | KIFERCELARTLKRLGLDGY  | Negative |
| P61629 | LLSVTVQGKIFERCELARTL  | Negative |
| P61629 | ILGLVLLSVTVQGKIFERCE  | Negative |
| P61629 | LARTLKRLGLDGYRGISLAN  | Negative |
| P61629 | IILGLVLLSVTVQGKIFERC  | Negative |
| P61629 | LGLVLLSVTVQGKIFERCEL  | Negative |
| P61629 | AVIILGLVLLSVTVQGKIFE  | Negative |
| P61629 | SVTVQGKIFERCELARTLKR  | Negative |
| P61629 | ELARTLKRLGLDGYRGISLA  | Negative |
| P61629 | RTLKRLGLDGYRGISLANWV  | Negative |
| P61629 | VQGKIFERCELARTLKRLGL  | Negative |
| P61769 | MSRSVALAVLALLSLSGLEA  | Negative |
| P61769 | LEAIQRTPKIQVYSRHPAEN  | Negative |
| P61769 | VLALLSLSGLEAIQRTPKIQ  | Negative |
| P61769 | VALAVLALLSLSGLEAIQRT  | Negative |
| P61769 | IQVYSRHPAENGKSNFLNCY  | Negative |
| P61769 | RSVALAVLALLSLSGLEAIQ  | Negative |
| P61769 | TPKIQVYSRHPAENGKSNFL  | Negative |
| P61769 | SVALAVLALLSLSGLEAIQR  | Negative |
| P61769 | LLSLSGLEAIQRTPKIQVYS  | Negative |
| P61769 | SGLEAIQRTPKIQVYSRHPA  | Negative |
| P61769 | LALLSLSGLEAIQRTPKIQV  | Negative |
| P61769 | RTPKIQVYSRHPAENGKSNF  | Negative |
| P61769 | LSLSGLEAIQRTPKIQVYSR  | Negative |
| P61769 | AVLALLSLSGLEAIQRTPKI  | Negative |
| P61769 | AIQRTPKIQVYSRHPAENGK  | Negative |
| P61769 | GLEAIQRTPKIQVYSRHPAE  | Negative |
| P61769 | QVYSRHPAENGKSNFLNCYV  | Negative |
| P61769 | ALLSLSGLEAIQRTPKIQVY  | Negative |
| P61769 | LSGLEAIQRTPKIQVYSRHP  | Negative |
| P61769 | SRSVALAVLALLSLSGLEAI  | Negative |
| P61769 | IQRTPKIQVYSRHPAENGKS  | Negative |
| P61769 | SLSGLEAIQRTPKIQVYSRH  | Negative |
| P61769 | PKIQVYSRHPAENGKSNFLN  | Negative |
| P61769 | EAIQRTPKIQVYSRHPAENG  | Negative |
| P61769 | KIQVYSRHPAENGKSNFLNC  | Negative |
| P61769 | LAVLALLSLSGLEAIQRTPK  | Negative |
| P61769 | YSRHPAENGKSNFLNCYVSG  | Negative |
| P61769 | VYSRHPAENGKSNFLNCYVS  | Negative |
| P61769 | QRTPKIQVYSRHPAENGKSN  | Negative |
| P61823 | LLVRVQPSLGKETAAAKFER  | Negative |
| P61823 | RVQPSLGKETAAAKFERQHM  | Negative |
| P61823 | AAAKFERQHMDSSTSAASSS  | Negative |
| P61823 | LLVLVLLLVVRVQPSLGKETA | Negative |
| P61823 | LVLLLVVRVQPSLGKETAAAK | Negative |

|        |                       |          |
|--------|-----------------------|----------|
| P61823 | KSLVLLSLLVLVLLLVVRVQP | Negative |
| P61823 | GKETAAAKFERQHMDSSSTA  | Negative |
| P61823 | VQPSLGKETAAAKFERQHMD  | Negative |
| P61823 | PSLGKETAAAKFERQHMDSS  | Negative |
| P61823 | TAAAKFERQHMDSSSTAASS  | Negative |
| P61823 | LSLLVLVLLLVVRVQPSLGKE | Negative |
| P61823 | VRVQPSLGKETAAAKFERQH  | Negative |
| P61823 | LVRVQPSLGKETAAAKFERQ  | Negative |
| P61823 | LLSLLVLVLLLVVRVQPSLGK | Negative |
| P61823 | MALKSLVLLSLLVLVLLLVVR | Negative |
| P61823 | ETAAAKFERQHMDSSSTAAS  | Negative |
| P61823 | SLVLLSLLVLVLLLVVRVQPS | Negative |
| P61823 | KETAAAKFERQHMDSSSTAAS | Negative |
| P61823 | LGKETAAAKFERQHMDSSST  | Negative |
| P61823 | ALKSLVLLSLLVLVLLLVVRV | Negative |
| P61823 | VLLLVVRVQPSLGKETAAAKF | Negative |
| P61823 | SLGKETAAAKFERQHMDSSST | Negative |
| P61823 | VLLSLLVLVLLLVVRVQPSLG | Negative |
| P61823 | SLLVLVLLLVVRVQPSLGKET | Negative |
| P61823 | LKSLVLLSLLVLVLLLVVRVQ | Negative |
| P61823 | LLLVVRVQPSLGKETAAAKFE | Negative |
| P61823 | QPSLGKETAAAKFERQHMDS  | Negative |
| P61823 | VLVLLLVVRVQPSLGKETAAA | Negative |
| P61823 | LVLLSLLVLVLLLVVRVQPSL | Negative |
| P61855 | WGKRSVGGAGPGTFFETQQG  | Negative |
| P61855 | MLLACVQCQLTFSPDWGKRS  | Negative |
| P61855 | CVQCQLTFSPDWGKRSVGG   | Negative |
| P61855 | ACVQCQLTFSPDWGKRSVGG  | Negative |
| P61855 | LFMLLACVQCQLTFSPDWGK  | Negative |
| P61855 | LLACVQCQLTFSPDWGKRVS  | Negative |
| P61855 | IAAVLFMLLACVQCQLTFSP  | Negative |
| P61855 | NPKSEVLIAAVLFMLLACVQ  | Negative |
| P61855 | SPDWGKRSVGGAGPGTFFET  | Negative |
| P61855 | VQCQLTFSPDWGKRSVGGAG  | Negative |
| P61855 | LTSPDWGKRSVGGAGPGTF   | Negative |
| P61855 | SEVLIAAVLFMLLACVQCQL  | Negative |
| P61855 | FMLLACVQCQLTFSPDWGKR  | Negative |
| P61855 | VLIAAVLFMLLACVQCQLTF  | Negative |
| P61855 | KSEVLIAAVLFMLLACVQCQ  | Negative |
| P61855 | QCQLTFSPDWGKRSVGGAGP  | Negative |
| P61855 | MNPKSEVLIAAVLFMLLACV  | Negative |
| P61855 | PKSEVLIAAVLFMLLACVQC  | Negative |
| P61855 | DWGKRSVGGAGPGTFFETQQ  | Negative |
| P61855 | AAVLFMLLACVQCQLTFSPD  | Negative |
| P61855 | VLFMLLACVQCQLTFSPDWG  | Negative |
| P61855 | QLTFSPDWGKRSVGGAGPGT  | Negative |

|        |                      |          |
|--------|----------------------|----------|
| P61855 | AVLFMLLACVQCQLTFSPDW | Negative |
| P61855 | TFSPDWGKRSVGGAGPGTFF | Negative |
| P61855 | FSPDWGKRSVGGAGPGTFFE | Negative |
| P61855 | CQLTFSPDWGKRSVGGAGPG | Negative |
| P61855 | LACVQCQLTFSPDWGKRSVG | Negative |
| P61855 | EVLIAAVLFMLLACVQCQLT | Negative |
| P61855 | PDWGKRSVGGAGPGTFFETQ | Negative |
| P61870 | FFTALSAVASLGYALPGKLQ | Negative |
| P61870 | TALSAVASLGYALPGKLQSR | Negative |
| P61870 | STSELDQFEFWVQYAAASY  | Negative |
| P61870 | AVASLGYALPGKLQSRDVST | Negative |
| P61870 | YALPGKLQSRDVSTSELDQF | Negative |
| P61870 | VSTSELDQFEFWVQYAAASY | Negative |
| P61870 | GKLQSRDVSTSELDQFEFWV | Negative |
| P61870 | QSRDVSTSELDQFEFWVQYA | Negative |
| P61870 | MRLSFFTALSAVASLGYALP | Negative |
| P61870 | SRDVSTSELDQFEFWVQYAA | Negative |
| P61870 | LPGKLQSRDVSTSELDQFEF | Negative |
| P61870 | LSAVASLGYALPGKLQSRDV | Negative |
| P61870 | SAVASLGYALPGKLQSRDVS | Negative |
| P61870 | PGKLQSRDVSTSELDQFEFW | Negative |
| P61870 | LSFFTALSAVASLGYALPGK | Negative |
| P61870 | KLQSRDVSTSELDQFEFWVQ | Negative |
| P61870 | GYALPGKLQSRDVSTSELDQ | Negative |
| P61870 | SFFTALSAVASLGYALPGKL | Negative |
| P61870 | RLSFFTALSAVASLGYALPG | Negative |
| P61870 | LGYALPGKLQSRDVSTSELD | Negative |
| P61870 | RDVSTSELDQFEFWVQYAAA | Negative |
| P61870 | SLGYALPGKLQSRDVSTSEL | Negative |
| P61870 | ALPGKLQSRDVSTSELDQFE | Negative |
| P61870 | DVSTSELDQFEFWVQYAAAS | Negative |
| P61870 | FTALSAVASLGYALPGKLQS | Negative |
| P61870 | TSELDQFEFWVQYAAASYE  | Negative |
| P61870 | LQSRDVSTSELDQFEFWVQY | Negative |
| P61870 | ASLGYALPGKLQSRDVSTSE | Negative |
| P61870 | ALSAVASLGYALPGKLQSRD | Negative |
| P61916 | TFLLLALSTAAQAEPVQFKD | Negative |
| P61916 | GSVDGVIKEVNVSPCPTQPC | Negative |
| P61916 | ATFLLLALSTAAQAEPVQFK | Negative |
| P61916 | STAAQAEPVQFKDCGSVDGV | Negative |
| P61916 | FKDCGSVDGVIKEVNVSPCP | Negative |
| P61916 | LLLALSTAAQAEPVQFKDCG | Negative |
| P61916 | ALSTAAQAEPVQFKDCGSVD | Negative |
| P61916 | KDCGSVDGVIKEVNVSPCPT | Negative |
| P61916 | FLLALSTAAQAEPVQFKDC  | Negative |
| P61916 | VDGVIKEVNVSPCPTQPCQL | Negative |

|        |                      |          |
|--------|----------------------|----------|
| P61916 | CGSVDGVIKEVNVSPCPTQP | Negative |
| P61916 | AEPVQFKDCGSVDGVIKEVN | Negative |
| P61916 | SVDGVIKEVNVSPCPTQPCQ | Negative |
| P61916 | VQFKDCGSVDGVIKEVNVSP | Negative |
| P61916 | QAEPVQFKDCGSVDGVIKEV | Negative |
| P61916 | RFLAATFLLLALSTAAQAEP | Negative |
| P61916 | QFKDCGSVDGVIKEVNVSPC | Negative |
| P61916 | DCGSVDGVIKEVNVSPCPTQ | Negative |
| P61916 | LAATFLLLALSTAAQAEPVQ | Negative |
| P61916 | TAAQAEPVQFKDCGSVDGVI | Negative |
| P61916 | LLALSTAAQAEPVQFKDCGS | Negative |
| P61916 | MRFLAATFLLLALSTAAQAE | Negative |
| P61916 | FLAATFLLLALSTAAQAEPV | Negative |
| P61916 | AQAEPVQFKDCGSVDGVIKE | Negative |
| P61916 | AAQAEPVQFKDCGSVDGVIK | Negative |
| P61916 | EPVQFKDCGSVDGVIKEVNV | Negative |
| P61916 | LALSTAAQAEPVQFKDCGSV | Negative |
| P61916 | LSTAAQAEPVQFKDCGSVDG | Negative |
| P61916 | PVQFKDCGSVDGVIKEVNVS | Negative |
| P62023 | TRKNAIPFYAFYGCYCGWGG | Negative |
| P62023 | ETRKNAIPFYAFYGCYCGWG | Negative |
| P62023 | GHLLQFNKMIKFETRKNAIP | Negative |
| P62023 | VLLVGVEGHLLQFNKMIKFE | Negative |
| P62023 | QFNKMIKFETRKNAIPFYAF | Negative |
| P62023 | VEGHLLQFNKMIKFETRKNA | Negative |
| P62023 | LWIVAVLLVGVEGHLLQFNK | Negative |
| P62023 | KMIKFETRKNAIPFYAFYGC | Negative |
| P62023 | WIVAVLLVGVEGHLLQFNKM | Negative |
| P62023 | VGVEGHLLQFNKMIKFETRK | Negative |
| P62023 | LLQFNKMIKFETRKNAIPFY | Negative |
| P62023 | GVEGHLLQFNKMIKFETRKN | Negative |
| P62023 | VAVLLVGVEGHLLQFNKMIK | Negative |
| P62023 | FNKMIKFETRKNAIPFYAFY | Negative |
| P62023 | EGHLLQFNKMIKFETRKNAI | Negative |
| P62023 | LVGVEGHLLQFNKMIKFETR | Negative |
| P62023 | MRALWIVAVLLVGVEGHLLQ | Negative |
| P62023 | MIKFETRKNAIPFYAFYGCY | Negative |
| P62023 | HLLQFNKMIKFETRKNAIPF | Negative |
| P62023 | RKNAIPFYAFYGCYCGWGGR | Negative |
| P62023 | IVAVLLVGVEGHLLQFNKMI | Negative |
| P62023 | AVLLVGVEGHLLQFNKMIKF | Negative |
| P62023 | LLVGVEGHLLQFNKMIKFET | Negative |
| P62023 | ALWIVAVLLVGVEGHLLQFN | Negative |
| P62023 | NKMIKFETRKNAIPFYAFYG | Negative |
| P62023 | IKFETRKNAIPFYAFYGCYC | Negative |
| P62023 | FETRKNAIPFYAFYGCYCGW | Negative |



|        |                       |          |
|--------|-----------------------|----------|
| P62023 | LQFNKMIKFETRKNAIPFYA  | Negative |
| P62023 | KFETRKNAIPFYAFYGCYCG  | Negative |
| P62376 | LTLVVVTIVCLDLGYTMTCC  | Negative |
| P62376 | TMTCCNQSSQPKTTTNCAE   | Negative |
| P62376 | CCNQSSQPKTTTNCAESSC   | Negative |
| P62376 | QSSQPKTTTNCAESSCYKKT  | Negative |
| P62376 | LLTLVVVTIVCLDLGYTMT   | Negative |
| P62376 | MTCCNQSSQPKTTTNCAES   | Negative |
| P62376 | VVTIVCLDLGYTMTCCNQSS  | Negative |
| P62376 | NQQSSQPKTTTNCAESSCYK  | Negative |
| P62376 | LDLGYTMTCCNQSSQPKTT   | Negative |
| P62376 | LLLTLVVVTIVCLDLGYTMT  | Negative |
| P62376 | IVCLDLGYTMTCCNQSSQP   | Negative |
| P62376 | SSQPKTTTNCAESSCYKKTW  | Negative |
| P62376 | TCCNQSSQPKTTTNCAESS   | Negative |
| P62376 | GYTMTCCNQSSQPKTTTNC   | Negative |
| P62376 | SQPKTTTNCAESSCYKKTWS  | Negative |
| P62376 | CLDLGYTMTCCNQSSQPKT   | Negative |
| P62376 | YMTCCNQSSQPKTTTNCA    | Negative |
| P62376 | LGYTMTCCNQSSQPKTTTN   | Negative |
| P62376 | PKTTTNCAESSCYKKTWSDH  | Negative |
| P62376 | VTIVCLDLGYTMTCCNQSS   | Negative |
| P62376 | DLGYTMTCCNQSSQPKTTT   | Negative |
| P62376 | QQSSQPKTTTNCAESSCYKK  | Negative |
| P62376 | TIVCLDLGYTMTCCNQSSQ   | Negative |
| P62376 | PLLLTLVVVTIVCLDLGYTM  | Negative |
| P62376 | VVVVTIVCLDLGYTMTCCNQ  | Negative |
| P62376 | CNQSSQPKTTTNCAESSCY   | Negative |
| P62376 | VCLDLGYTMTCCNQSSQPK   | Negative |
| P62376 | QPKTTTNCAESSCYKKTWSD  | Negative |
| P62376 | LVVVVTIVCLDLGYTMTCCNQ | Negative |
| P62520 | LFILGLALLVLAFEAQVGE   | Negative |
| P62520 | VGESDGECCGFWWKCGRGKP  | Negative |
| P62520 | AQVGESDGECCGFWWKCGRG  | Negative |
| P62520 | LGLALLVLAFEAQVGESDG   | Negative |
| P62520 | ILGLALLVLAFEAQVGESD   | Negative |
| P62520 | AFEAQVGESDGECCGFWWK   | Negative |
| P62520 | LAFEAQVGESDGECCGFWWK  | Negative |
| P62520 | ECGGFWWKCGRGKPPCKGY   | Negative |
| P62520 | VLAFEAQVGESDGECCGFWW  | Negative |
| P62520 | KNTSILFILGLALLVLAFE   | Negative |
| P62520 | DGECCGFWWKCGRGKPPCK   | Negative |
| P62520 | SILFILGLALLVLAFEAQV   | Negative |
| P62520 | LLVLAFEAQVGESDGECCGF  | Negative |
| P62520 | LVLAFEAQVGESDGECCGFW  | Negative |
| P62520 | NTSILFILGLALLVLAFEA   | Negative |

|        |                       |          |
|--------|-----------------------|----------|
| P62520 | QVGESDGECCGGFWWKCGRGK | Negative |
| P62520 | EAQVGESDGECCGGFWWKCGR | Negative |
| P62520 | SDGECCGGFWWKCGRGKPPCC | Negative |
| P62520 | LLLVLAFEAAQVGESDGECCG | Negative |
| P62520 | GECGGFWWKCGRGKPPCCKG  | Negative |
| P62520 | FILGLALLVLAFEAAQVGES  | Negative |
| P62520 | ILFILGLALLVLAFEAAQVG  | Negative |
| P62520 | ESDGECCGGFWWKCGRGKPPC | Negative |
| P62520 | TSILFILGLALLVLAFEAAQ  | Negative |
| P62520 | MKNTSILFILGLALLVLAF   | Negative |
| P62520 | LALLVLAFEAAQVGESDGE   | Negative |
| P62520 | GESDGECCGGFWWKCGRGKPP | Negative |
| P62520 | GLALLVLAFEAAQVGESDGE  | Negative |
| P62520 | FEAQVGESDGECCGGFWWKCG | Negative |
| P62593 | TLVKVKDAEDQLGARVGYIE  | Negative |
| P62593 | PVFAHPETLVKVKDAEDQLG  | Negative |
| P62593 | FCLPVFAHPETLVKVKDAED  | Negative |
| P62593 | AHPETLVKVKDAEDQLGARV  | Negative |
| P62593 | LPVFAHPETLVKVKDAEDQL  | Negative |
| P62593 | CLPVFAHPETLVKVKDAEDQ  | Negative |
| P62593 | VKVKDAEDQLGARVGYIELD  | Negative |
| P62593 | LVKVKDAEDQLGARVGYIEL  | Negative |
| P62593 | FAAFCLPVFAHPETLVKVKD  | Negative |
| P62593 | FAHPETLVKVKDAEDQLGAR  | Negative |
| P62593 | ETLVKVKDAEDQLGARVGYI  | Negative |
| P62593 | AAFCLPVFAHPETLVKVKDA  | Negative |
| P62593 | PFFAAFCLPVFAHPETLVKV  | Negative |
| P62593 | VFAHPETLVKVKDAEDQLGA  | Negative |
| P62593 | MSIQHFRVALIPFFAAAFCLP | Negative |
| P62593 | QHFRVALIPFFAAAFCLPVFA | Negative |
| P62593 | HFRVALIPFFAAAFCLPVFAH | Negative |
| P62593 | HPETLVKVKDAEDQLGARVG  | Negative |
| P62593 | IQHFRVALIPFFAAAFCLPVF | Negative |
| P62593 | FRVALIPFFAAAFCLPVFAHP | Negative |
| P62593 | VALIPFFAAAFCLPVFAHPET | Negative |
| P62593 | LIPFFAAAFCLPVFAHPETLV | Negative |
| P62593 | PETLVKVKDAEDQLGARVGY  | Negative |
| P62593 | RVALIPFFAAAFCLPVFAHPE | Negative |
| P62593 | AFCLPVFAHPETLVKVKDAE  | Negative |
| P62593 | KVKDAEDQLGARVGYIELDL  | Negative |
| P62593 | IPFFAAAFCLPVFAHPETLVK | Negative |
| P62593 | SIQHFRVALIPFFAAAFCLPV | Negative |
| P62593 | FFAAAFCLPVFAHPETLVKVK | Negative |
| P62928 | LGMFLTKNVGAISCNGVCSP  | Negative |
| P62928 | ASVKLASLIVLFATLGMFLT  | Negative |
| P62928 | KLASLIVLFATLGMFLTKNV  | Negative |

|        |                      |          |
|--------|----------------------|----------|
| P62928 | SCNGVCSPFDIPPCGSPLCR | Negative |
| P62928 | NGVCSPFDIPPCGSPLCRCI | Negative |
| P62928 | FLTKNVGAISCNGVCSPFDI | Negative |
| P62928 | TKNVGAISCNGVCSPFDIPP | Negative |
| P62928 | LIVLFATLGMFLTKNVGAIS | Negative |
| P62928 | TLGMFLTKNVGAISCNGVCS | Negative |
| P62928 | ATLGMFLTKNVGAISCNGVC | Negative |
| P62928 | NVGAISCNGVCSPFDIPPCG | Negative |
| P62928 | AISCNGVCSPFDIPPCGSPL | Negative |
| P62928 | GAISCNGVCSPFDIPPCGSP | Negative |
| P62928 | VGAISCNGVCSPFDIPPCGS | Negative |
| P62928 | ISCNGVCSPFDIPPCGSPLC | Negative |
| P62928 | KNVGAISCNGVCSPFDIPPC | Negative |
| P62928 | IVLFATLGMFLTKNVGAISC | Negative |
| P62928 | VKLASLIVLFATLGMFLTKN | Negative |
| P62928 | FATLGMFLTKNVGAISCNGV | Negative |
| P62928 | VLFATLGMFLTKNVGAISCN | Negative |
| P62928 | SLIVLFATLGMFLTKNVGAI | Negative |
| P62928 | LASLIVLFATLGMFLTKNVG | Negative |
| P62928 | ASLIVLFATLGMFLTKNVGA | Negative |
| P62928 | CNGVCSPFDIPPCGSPLCRC | Negative |
| P62928 | SVKLASLIVLFATLGMFLTK | Negative |
| P62928 | MFLTKNVGAISCNGVCSPFD | Negative |
| P62928 | LTKNVGAISCNGVCSPFDIP | Negative |
| P62928 | MASVKLASLIVLFATLGMFL | Negative |
| P62928 | GMFLTKNVGAISCNGVCSPF | Negative |
| P62931 | LTKNVGAASCNGVCSPFEMP | Negative |
| P62931 | KLASLIVLFATLGMFLTKNV | Negative |
| P62931 | KNVGAASCNGVCSPFEMPPC | Negative |
| P62931 | NVGAASCNGVCSPFEMPPCG | Negative |
| P62931 | TKNVGAASCNGVCSPFEMPP | Negative |
| P62931 | SVKLASLIVLFATLGMFLTK | Negative |
| P62931 | ASVKLASLIVLFATLGMFLT | Negative |
| P62931 | LASLIVLFATLGMFLTKNVG | Negative |
| P62931 | SCNGVCSPFEMPPCGTSACR | Negative |
| P62931 | ATLGMFLTKNVGAASCNGVC | Negative |
| P62931 | LGMFLTKNVGAASCNGVCSP | Negative |
| P62931 | ASLIVLFATLGMFLTKNVGA | Negative |
| P62931 | TLGMFLTKNVGAASCNGVCS | Negative |
| P62931 | ASCNGVCSPFEMPPCGTSAC | Negative |
| P62931 | MFLTKNVGAASCNGVCSPFE | Negative |
| P62931 | AASCNGVCSPFEMPPCGTSA | Negative |
| P62931 | SLIVLFATLGMFLTKNVGAA | Negative |
| P62931 | FLTKNVGAASCNGVCSPFEM | Negative |
| P62931 | NGVCSPFEMPPCGTSACRCI | Negative |
| P62931 | GAASCNGVCSPFEMPPCGTS | Negative |

|        |                       |          |
|--------|-----------------------|----------|
| P62931 | MASVKLASLIVLFATLGMFL  | Negative |
| P62931 | CNGVCSPFEMPPCGTSACRC  | Negative |
| P62931 | FATLGMFLTKNVGAASCNGV  | Negative |
| P62931 | LIVLFATLGMFLTKNVGAAS  | Negative |
| P62931 | VLFATLGMFLTKNVGAASCN  | Negative |
| P62931 | VGAASCNGVCSPFEMPPCGT  | Negative |
| P62931 | IVLFATLGMFLTKNVGAASC  | Negative |
| P62931 | GMFLTKNVGAASCNGVCSPF  | Negative |
| P62931 | VKLASLIVLFATLGMFLTKN  | Negative |
| P63090 | VDTAEAGKKEKPEKKVKKSD  | Negative |
| P63090 | DTAEAGKKEKPEKKVKKSDC  | Negative |
| P63090 | KFAAAFLALIFILAAVDTAE  | Negative |
| P63090 | IFILAAVDTAEAGKKEKPEK  | Negative |
| P63090 | AFLALIFILAAVDTAEAGKK  | Negative |
| P63090 | AAFLALIFILAAVDTAEAGK  | Negative |
| P63090 | QRRKFAAAFLALIFILAAVD  | Negative |
| P63090 | RKFAAAFLALIFILAAVDTA  | Negative |
| P63090 | MSSQQYQQQRRKFAAAFLAL  | Negative |
| P63090 | YQQQRRKFAAAFLALIFILA  | Negative |
| P63090 | RRKFAAAFLALIFILAAVDT  | Negative |
| P63090 | ALIFILAAVDTAEAGKKEKP  | Negative |
| P63090 | QYQQQRRKFAAAFLALIFIL  | Negative |
| P63090 | AAAFALALIFILAAVDTAEAG | Negative |
| P63090 | LIFILAAVDTAEAGKKEKPE  | Negative |
| P63090 | FLALIFILAAVDTAEAGKKE  | Negative |
| P63090 | QQYQQQRRKFAAAFLALIFI  | Negative |
| P63090 | ILAAVDTAEAGKKEKPEKKV  | Negative |
| P63090 | AAVDTAEAGKKEKPEKKVKK  | Negative |
| P63090 | LAAVDTAEAGKKEKPEKKVK  | Negative |
| P63090 | QQQRRKFAAAFLALIFILAA  | Negative |
| P63090 | AEAGKKEKPEKKVKKSDCGE  | Negative |
| P63090 | QQRRKFAAAFLALIFILAAV  | Negative |
| P63090 | TAEAGKKEKPEKKVKKSDCG  | Negative |
| P63090 | AVDTAEAGKKEKPEKKVKK   | Negative |
| P63090 | SSQQYQQQRRKFAAAFLALI  | Negative |
| P63090 | FILAAVDTAEAGKKEKPEKK  | Negative |
| P63090 | SQQYQQQRRKFAAAFLALIF  | Negative |
| P63090 | FAAAFLALIFILAAVDTAEA  | Negative |
| P64534 | AAWAAPATAGSTNTSGISKY  | Negative |
| P64534 | MLLGALLVTSAAWAAPATA   | Negative |
| P64534 | NTSGISKYELSSFIADFKHF  | Negative |
| P64534 | AGSTNTSGISKYELSSFIAD  | Negative |
| P64534 | SAAWAAPATAGSTNTSGISK  | Negative |
| P64534 | TNTSGISKYELSSFIADFKH  | Negative |
| P64534 | KNKMLLGALLVTSAAWAAP   | Negative |
| P64534 | STNTSGISKYELSSFIADFK  | Negative |

|        |                       |          |
|--------|-----------------------|----------|
| P64534 | AAPATAGSTNTSGISKYELS  | Negative |
| P64534 | GALLLVTSAAWAAPATAGST  | Negative |
| P64534 | APATAGSTNTSGISKYELSS  | Negative |
| P64534 | ATAGSTNTSGISKYELSSFI  | Negative |
| P64534 | LGALLLVTSAAWAAPATAGS  | Negative |
| P64534 | GSTNTSGISKYELSSFIADF  | Negative |
| P64534 | PATAGSTNTSGISKYELSSF  | Negative |
| P64534 | VTSAAWAAPATAGSTNTSGI  | Negative |
| P64534 | WAAPATAGSTNTSGISKYEL  | Negative |
| P64534 | TAGSTNTSGISKYELSSFIA  | Negative |
| P64534 | MTIKNKMLLGALLLVTSAAW  | Negative |
| P64534 | TIKNKMLLGALLLVTSAAWA  | Negative |
| P64534 | LVTSAAWAAPATAGSTNTSG  | Negative |
| P64534 | LLVTSAAWAAPATAGSTNTS  | Negative |
| P64534 | IKNKMLLGALLLVTSAAWAA  | Negative |
| P64534 | TSAAWAAPATAGSTNTSGIS  | Negative |
| P64534 | KMLLGALLLVTSAAWAAPAT  | Negative |
| P64534 | LLLVTSAAWAAPATAGSTNT  | Negative |
| P64534 | NKMLLGALLLVTSAAWAAPA  | Negative |
| P64534 | LLGALLLVTSAAWAAPATAG  | Negative |
| P64534 | AWAAPATAGSTNTSGISKEYE | Negative |
| P67788 | MFIAFVIIAEQLTFTSSWG   | Negative |
| P67788 | IAEAQLTFTSSWGGKRAMTN  | Negative |
| P67788 | GGKRAMTNSISCRNDEAIAA  | Negative |
| P67788 | VFLMFIAFVIIAEQLTFTS   | Negative |
| P67788 | LMFIAFVIIAEQLTFTSSW   | Negative |
| P67788 | FLMFIAFVIIAEQLTFTSS   | Negative |
| P67788 | YKLTVFLMFIAFVIIAEQQL  | Negative |
| P67788 | MYKLTVFLMFIAFVIIAEQ   | Negative |
| P67788 | LTFTSSWGGKRAMTNSISCR  | Negative |
| P67788 | QLTFTSSWGGKRAMTNSISC  | Negative |
| P67788 | WGGKRAMTNSISCRNDEAIA  | Negative |
| P67788 | TFTSSWGGKRAMTNSISCRN  | Negative |
| P67788 | LTVFLMFIAFVIIAEQQLTF  | Negative |
| P67788 | IIAEQQLTFTSSWGGKRAMT  | Negative |
| P67788 | EAQLTFTSSWGGKRAMTNSI  | Negative |
| P67788 | KRAMTNSISCRNDEAIAAIY  | Negative |
| P67788 | SWGGKRAMTNSISCRNDEAI  | Negative |
| P67788 | TSSWGGKRAMTNSISCRNDE  | Negative |
| P67788 | FIAFVIIAEQLTFTSSWGG   | Negative |
| P67788 | GKRAMTNSISCRNDEAIAAI  | Negative |
| P67788 | VIIAEQQLTFTSSWGGKRAM  | Negative |
| P67788 | AQLTFTSSWGGKRAMTNSIS  | Negative |
| P67788 | SSWGGKRAMTNSISCRNDEA  | Negative |
| P67788 | FTSSWGGKRAMTNSISCRND  | Negative |
| P67788 | AEQQLTFTSSWGGKRAMTNS  | Negative |

|        |                       |          |
|--------|-----------------------|----------|
| P67788 | KLTVFLMFIAFVIIAEALQTL | Negative |
| P67788 | IAFVIIAEALQTLFTSSWGGK | Negative |
| P67788 | FVIIAEALQTLFTSSWGGKRA | Negative |
| P67788 | AFVIIAEALQTLFTSSWGGKR | Negative |
| P67861 | LFCIQGWPSGTVQGQVRPFL  | Negative |
| P67861 | AAYLLAVAILFCIQGWPSGT  | Negative |
| P67861 | GQVRPFLDVYERSACQTRET  | Negative |
| P67861 | VQGQVRPFLDVYERSACQTR  | Negative |
| P67861 | RPFLDVYERSACQTRETLVS  | Negative |
| P67861 | AYLLAVAILFCIQGWPSGTV  | Negative |
| P67861 | WPSGTVQGQVRPFLDVYERS  | Negative |
| P67861 | QVRPFLDVYERSACQTRETL  | Negative |
| P67861 | IQGWPSGTVQGQVRPFLDVY  | Negative |
| P67861 | QGQVRPFLDVYERSACQTRE  | Negative |
| P67861 | LLAVAILFCIQGWPSGTVQG  | Negative |
| P67861 | VAILFCIQGWPSGTVQGQVR  | Negative |
| P67861 | AVAILFCIQGWPSGTVQGQV  | Negative |
| P67861 | QGWPSGTVQGQVRPFLDVYE  | Negative |
| P67861 | PFLDVYERSACQTRETLVSI  | Negative |
| P67861 | LAVAILFCIQGWPSGTVQGQ  | Negative |
| P67861 | PSGTVQGQVRPFLDVYERSA  | Negative |
| P67861 | AILFCIQGWPSGTVQGQVRP  | Negative |
| P67861 | MAAYLLAVAILFCIQGWPSG  | Negative |
| P67861 | YLLAVAILFCIQGWPSGTVQ  | Negative |
| P67861 | LDVYERSACQTRETLVSILQ  | Negative |
| P67861 | SGTVQGQVRPFLDVYERSAC  | Negative |
| P67861 | TVQGQVRPFLDVYERSACQT  | Negative |
| P67861 | CIQGWPSGTVQGQVRPFLDV  | Negative |
| P67861 | GTVQGQVRPFLDVYERSACQ  | Negative |
| P67861 | FCIQGWPSGTVQGQVRPFLD  | Negative |
| P67861 | GWPSGTVQGQVRPFLDVYER  | Negative |
| P67861 | VRPFLDVYERSACQTRETLV  | Negative |
| P67861 | FLDVYERSACQTRETLVSIL  | Negative |
| P67876 | APSPLDARATWTCINQQLNP  | Negative |
| P67876 | TWTCINQQLNPKNKWEDKR   | Negative |
| P67876 | AVSVLAAPSPLDARATWTCI  | Negative |
| P67876 | DARATWTCINQQLNPKNKW   | Negative |
| P67876 | AAPSPLDARATWTCINQQLN  | Negative |
| P67876 | MVAIKNLFLLAATAVSVLAA  | Negative |
| P67876 | WTCINQQLNPKNKWEDKRL   | Negative |
| P67876 | PLDARATWTCINQQLNPKN   | Negative |
| P67876 | ATWTCINQQLNPKNKWEDK   | Negative |
| P67876 | VAIKNLFLLAATAVSVLAAP  | Negative |
| P67876 | VSVLAAPSPLDARATWTCIN  | Negative |
| P67876 | LAAPSPLDARATWTCINQQL  | Negative |
| P67876 | KNLFLLAATAVSVLAAPSPL  | Negative |

|        |                      |          |
|--------|----------------------|----------|
| P67876 | ATAVSVLAAPSPLDARATWT | Negative |
| P67876 | SVLAAPSPLDARATWTCINQ | Negative |
| P67876 | LDARATWTCINQQLNPKTNK | Negative |
| P67876 | VLAAPSPLDARATWTCINQQ | Negative |
| P67876 | AATAVSVLAAPSPLDARATW | Negative |
| P67876 | LFLLAATAVSVLAAPSPLDA | Negative |
| P67876 | NLFLLAATAVSVLAAPSPLD | Negative |
| P67876 | LAATAVSVLAAPSPLDARAT | Negative |
| P67876 | ARATWTCINQQLNPKTNKWE | Negative |
| P67876 | FLLAATAVSVLAAPSPLDAR | Negative |
| P67876 | IKNLFLLAATAVSVLAAPS  | Negative |
| P67876 | AIKNLFLLAATAVSVLAAPS | Negative |
| P67876 | LLAATAVSVLAAPSPLDARA | Negative |
| P67876 | RATWTCINQQLNPKTNKWED | Negative |
| P67876 | SPLDARATWTCINQQLNPKT | Negative |
| P67876 | PSPLDARATWTCINQQLNPK | Negative |
| P67930 | FTLLCLPWTQVVGAFPAMSL | Negative |
| P67930 | TLLCLPWTQVVGAFPAMSLS | Negative |
| P67930 | LLAFTLLCLPWTQVVGAFPA | Negative |
| P67930 | RTSLLLAFTLLCLPWTQVVG | Negative |
| P67930 | TSLLLAFTLLCLPWTQVVG  | Negative |
| P67930 | MMAAGPRTSLLLAFTLLCLP | Negative |
| P67930 | VGAFPAMSLSGLFANAVLRA | Negative |
| P67930 | LCLPWTQVVGAFPAMSLSGL | Negative |
| P67930 | LLCLPWTQVVGAFPAMSLSG | Negative |
| P67930 | AFPAMSLSGLFANAVLRAQH | Negative |
| P67930 | AMSLSGLFANAVLRAQHLHQ | Negative |
| P67930 | PWTQVVGAFPAMSLSGLFAN | Negative |
| P67930 | GAFPAMSLSGLFANAVLRAQ | Negative |
| P67930 | LAFTLLCLPWTQVVGAFPAM | Negative |
| P67930 | AAGPRTSLLLAFTLLCLPWT | Negative |
| P67930 | GPRTSLLLAFTLLCLPWTQV | Negative |
| P67930 | VVGAFPAMSLSGLFANAVLR | Negative |
| P67930 | FPAMSLSGLFANAVLRAQHL | Negative |
| P67930 | TQVVGAFPAMSLSGLFANAV | Negative |
| P67930 | LPWTQVVGAFPAMSLSGLFA | Negative |
| P67930 | WTQVVGAFPAMSLSGLFANA | Negative |
| P67930 | MAAGPRTSLLLAFTLLCLPW | Negative |
| P67930 | LLAFTLLCLPWTQVVGAFP  | Negative |
| P67930 | PAMSLSGLFANAVLRAQHLH | Negative |
| P67930 | SLLAFTLLCLPWTQVVGAF  | Negative |
| P67930 | QVVGAFPAMSLSGLFANAVL | Negative |
| P67930 | PRTSLLLAFTLLCLPWTQVV | Negative |
| P67930 | CLPWTQVVGAFPAMSLSGLF | Negative |
| P67930 | AGPRTSLLLAFTLLCLPWTQ | Negative |
| P67970 | QHLCGSHLVEALYLCGERG  | Negative |

|        |                       |          |
|--------|-----------------------|----------|
| P67970 | ANQHLCGSHLVEALYLVCGE  | Negative |
| P67970 | AAANQHLCGSHLVEALYLC   | Negative |
| P67970 | LWIRSLPLLALLVFSGPGTS  | Negative |
| P67970 | LCGSHLVEALYLVCCGERGFF | Negative |
| P67970 | LLVFSGPGTSYAAANQHLCG  | Negative |
| P67970 | TSYAAANQHLCGSHLVEALY  | Negative |
| P67970 | SGPGTSYAAANQHLCGSHLV  | Negative |
| P67970 | RSLPLLALLVFSGPGTSYAA  | Negative |
| P67970 | GTSYAAANQHLCGSHLVEAL  | Negative |
| P67970 | ALWIRSLPLLALLVFSGPGT  | Negative |
| P67970 | VFSGPGTSYAAANQHLCGSH  | Negative |
| P67970 | PGTSYAAANQHLCGSHLVEA  | Negative |
| P67970 | YAAANQHLCGSHLVEALYLV  | Negative |
| P67970 | SYAAANQHLCGSHLVEALYL  | Negative |
| P67970 | NQHLCGSHLVEALYLVCCGER | Negative |
| P67970 | AANQHLCGSHLVEALYLVCG  | Negative |
| P67970 | IRSLPLLALLVFSGPGTSYA  | Negative |
| P67970 | PLLALLVFSGPGTSYAAANQ  | Negative |
| P67970 | SLPLLALLVFSGPGTSYAAA  | Negative |
| P67970 | ALLVFSGPGTSYAAANQHLC  | Negative |
| P67970 | HLCGSHLVEALYLVCCGERGF | Negative |
| P67970 | GPGTSYAAANQHLCGSHLVE  | Negative |
| P67970 | LALLVFSGPGTSYAAANQHL  | Negative |
| P67970 | MALWIRSLPLLALLVFSGPG  | Negative |
| P67970 | FSGPGTSYAAANQHLCGSHL  | Negative |
| P67970 | LVFSGPGTSYAAANQHLCGS  | Negative |
| P67970 | WIRSLPLLALLVFSGPGTSY  | Negative |
| P67970 | LPLLALLVFSGPGTSYAAAN  | Negative |
| P67976 | LACGVQAIIVTQTMKGLDIQ  | Negative |
| P67976 | VQAIIVTQTMKGLDIQKVAG  | Negative |
| P67976 | ALACGVQAIIVTQTMKGLDI  | Negative |
| P67976 | MKCLLLALGLALACGVQAI   | Negative |
| P67976 | KGLDIQKVAGTWHSLAMAAS  | Negative |
| P67976 | CLLLALGLALACGVQAIIVT  | Negative |
| P67976 | IIVTQTMKGLDIQKVAGTWH  | Negative |
| P67976 | TQTMKGLDIQKVAGTWHSLA  | Negative |
| P67976 | TMKGLDIQKVAGTWHSLAMA  | Negative |
| P67976 | QTMKGLDIQKVAGTWHSLAM  | Negative |
| P67976 | GLDIQKVAGTWHSLAMAASD  | Negative |
| P67976 | ACGVQAIIVTQTMKGLDIQK  | Negative |
| P67976 | LLALGLALACGVQAIIVTQT  | Negative |
| P67976 | LDIQKVAGTWHSLAMAASDI  | Negative |
| P67976 | MKGLDIQKVAGTWHSLAMAA  | Negative |
| P67976 | CGVQAIIVTQTMKGLDIQKV  | Negative |
| P67976 | VTQTMKGLDIQKVAGTWHSL  | Negative |
| P67976 | IVTQTMKGLDIQKVAGTWH   | Negative |



|        |                       |          |
|--------|-----------------------|----------|
| P67976 | LGLALACGVQAIIVTQTMKG  | Negative |
| P67976 | AIIVTQTMKGLDIQKVAGTW  | Negative |
| P67976 | ALGLALACGVQAIIVTQTMK  | Negative |
| P67976 | IQKVAGTWHSLAMAASDISL  | Negative |
| P67976 | QAIIVTQTMKGLDIQKVAGT  | Negative |
| P67976 | LALGLALACGVQAIIVTQTM  | Negative |
| P67976 | DIQKVAGTWHSLAMAASDIS  | Negative |
| P67976 | GLALACGVQAIIVTQTMKGL  | Negative |
| P67976 | GVQAIIVTQTMKGLDIQKVA  | Negative |
| P67976 | LALACGVQAIIVTQTMKGLD  | Negative |
| P67976 | KCLLLALGLALACGVQAIIV  | Negative |
| P67977 | KIFERCELARTLKKLGLDGY  | Negative |
| P67977 | QGKIFERCELARTLKKLGLD  | Negative |
| P67977 | LVLLSVTVQGKIFERCELAR  | Negative |
| P67977 | LARTLKKLGLDGYKGVSLAN  | Negative |
| P67977 | LSVTVQGKIFERCELARTLK  | Negative |
| P67977 | ARTLKKLGLDGYKGVSLANW  | Negative |
| P67977 | ERCELARTLKKLGLDGYKGV  | Negative |
| P67977 | ILGLVLLSVTVQGKIFERCE  | Negative |
| P67977 | KALTILGLVLLSVTVQGKIF  | Negative |
| P67977 | GKIFERCELARTLKKLGLDG  | Negative |
| P67977 | MKALTILGLVLLSVTVQGKI  | Negative |
| P67977 | LKKLGLDGYKGVSLANWVCL  | Negative |
| P67977 | IFERCELARTLKKLGLDGYK  | Negative |
| P67977 | FERCELARTLKKLGLDGYKG  | Negative |
| P67977 | TVQGKIFERCELARTLKKLG  | Negative |
| P67977 | LLSVTVQGKIFERCELARTL  | Negative |
| P67977 | ALTILGLVLLSVTVQGKIFE  | Negative |
| P67977 | VLLSVTVQGKIFERCELART  | Negative |
| P67977 | VTVQGKIFERCELARTLKKL  | Negative |
| P67977 | VQGKIFERCELARTLKKLGL  | Negative |
| P67977 | ELARTLKKLGLDGYKGVSLA  | Negative |
| P67977 | LGLVLLSVTVQGKIFERCEL  | Negative |
| P67977 | SVTVQGKIFERCELARTLKK  | Negative |
| P67977 | RCELARTLKKLGLDGYKGVSL | Negative |
| P67977 | GLVLLSVTVQGKIFERCELA  | Negative |
| P67977 | TLKKLGLDGYKGVSLANWVC  | Negative |
| P67977 | CELARTLKKLGLDGYKGVSL  | Negative |
| P67977 | TILGLVLLSVTVQGKIFERC  | Negative |
| P67977 | RTLKKLGLDGYKGVSLANWV  | Negative |
| P68248 | LLLLAVPPGTAGPSQPTYPG  | Negative |
| P68248 | PGTAGPSQPTYPGDDAPVED  | Negative |
| P68248 | LAVPPGTAGPSQPTYPGDDA  | Negative |
| P68248 | CSLLLLAVPPGTAGPSQPTY  | Negative |
| P68248 | MPPRWASLLLLACSLLLLLAV | Negative |
| P68248 | LLACSLLLLLAVPPGTAGPSQ | Negative |

|        |                      |          |
|--------|----------------------|----------|
| P68248 | RWASLLLLACSLLLLAVPPG | Negative |
| P68248 | QPTYPGDDAPVEDLIRFYND | Negative |
| P68248 | WASLLLLACSLLLLAVPPGT | Negative |
| P68248 | VPPGTAGPSQPTYPGDDAPV | Negative |
| P68248 | LLLLACSLLLLAVPPGTAGP | Negative |
| P68248 | GTAGPSQPTYPGDDAPVEDL | Negative |
| P68248 | ACSLLLLAVPPGTAGPSQPT | Negative |
| P68248 | AGPSQPTYPGDDAPVEDLIR | Negative |
| P68248 | PRWASLLLLACSLLLLAVPP | Negative |
| P68248 | SLLLLACSLLLLAVPPGTAG | Negative |
| P68248 | PPRWASLLLLACSLLLAVP  | Negative |
| P68248 | SQPTYPGDDAPVEDLIRFYN | Negative |
| P68248 | ASLLLLACSLLLLAVPPGTA | Negative |
| P68248 | LLAVPPGTAGPSQPTYPGD  | Negative |
| P68248 | LLAVPPGTAGPSQPTYPGDD | Negative |
| P68248 | PPGTAGPSQPTYPGDDAPVE | Negative |
| P68248 | AVPPGTAGPSQPTYPGDDAP | Negative |
| P68248 | GPSQPTYPGDDAPVEDLIRF | Negative |
| P68248 | PSQPTYPGDDAPVEDLIRFY | Negative |
| P68248 | TAGPSQPTYPGDDAPVEDLI | Negative |
| P68248 | SLLLLAVPPGTAGPSQPTY  | Negative |
| P68248 | PTYPGDDAPVEDLIRFYNDL | Negative |
| P68248 | LLACSLLLLAVPPGTAGPS  | Negative |
| P68638 | PSRPINMKFKNSVETDANAN | Negative |
| P68638 | IPSRPINMKFKNSVETDANA | Negative |
| P68638 | SRPINMKFKNSVETDANANY | Negative |
| P68638 | NMKFKNSVETDANANYNIGD | Negative |
| P68638 | TIPSRPINMKFKNSVETDAN | Negative |
| P68638 | INMKFKNSVETDANANYNIG | Negative |
| P68638 | CVLSCCTIPSRPINMKFKNS | Negative |
| P68638 | CCTIPSRPINMKFKNSVETD | Negative |
| P68638 | MKFKNSVETDANANYNIGDT | Negative |
| P68638 | FLTLLGIGCVLSCCTIPSRP | Negative |
| P68638 | ESVTFLTLLGIGCVLSCCTI | Negative |
| P68638 | RPINMKFKNSVETDANANYN | Negative |
| P68638 | GCVLSCCTIPSRPINMKFKN | Negative |
| P68638 | LTLLGIGCVLSCCTIPSRPI | Negative |
| P68638 | LSCCTIPSRPINMKFKNSVE | Negative |
| P68638 | VESVTFLTLLGIGCVLSCCT | Negative |
| P68638 | PINMKFKNSVETDANANYNI | Negative |
| P68638 | IGCVLSCCTIPSRPINMKFK | Negative |
| P68638 | SCCTIPSRPINMKFKNSVET | Negative |
| P68638 | VLSCCTIPSRPINMKFKNSV | Negative |
| P68638 | TFLTLLGIGCVLSCCTIPSR | Negative |
| P68638 | TLLGIGCVLSCCTIPSRPIN | Negative |
| P68638 | LLGIGCVLSCCTIPSRPINM | Negative |

|        |                       |          |
|--------|-----------------------|----------|
| P68638 | CTIPSRPINMKFKNSVETDA  | Negative |
| P68638 | KVESVTFLTLLGIGCVLSCC  | Negative |
| P68638 | VTFLTLLGIGCVLSCCTIPS  | Negative |
| P68638 | LGIGCVLSCCTIPSRPINMK  | Negative |
| P68638 | MKVESVTFLTLLGIGCVLSC  | Negative |
| P68638 | GIGCVLSCCTIPSRPINMKF  | Negative |
| P69241 | AKFASIIALLFAALVLFAAF  | Negative |
| P69241 | MVEAQKLCERPSGTWSGVC   | Negative |
| P69241 | IIALLFAALVLFAAFEAPTM  | Negative |
| P69241 | LLFAALVLFAAFEAPTMVEA  | Negative |
| P69241 | PTMVEAQKLCERPSGTWSGV  | Negative |
| P69241 | ALVLFAAFEAPTMVEAQKLC  | Negative |
| P69241 | VEAQKLCERPSGTWSGVC    | Negative |
| P69241 | EAQKLCERPSGTWSGVC     | Negative |
| P69241 | QKLCERPSGTWSGVC       | Negative |
| P69241 | AFEAPTMVEAQKLCERPSGT  | Negative |
| P69241 | AALVLFAAFEAPTMVEAQKL  | Negative |
| P69241 | LFAAFEAPTMVEAQKLCERP  | Negative |
| P69241 | ASIIALLFAALVLFAAFEAP  | Negative |
| P69241 | LFAALVLFAAFEAPTMVEAQ  | Negative |
| P69241 | AQKLCERPSGTWSGVC      | Negative |
| P69241 | FASIIALLFAALVLFAAFE   | Negative |
| P69241 | FAALVLFAAFEAPTMVEAQK  | Negative |
| P69241 | FEAPTMVEAQKLCERPSGTW  | Negative |
| P69241 | VLFAAFEAPTMVEAQKLCER  | Negative |
| P69241 | TMVEAQKLCERPSGTWSGVC  | Negative |
| P69241 | ALLFAALVLFAAFEAPTMVE  | Negative |
| P69241 | SIIALLFAALVLFAAFEAPT  | Negative |
| P69241 | AAFEAPTMVEAQKLCERPSG  | Negative |
| P69241 | EAPTMVEAQKLCERPSGTWS  | Negative |
| P69241 | KFASIIALLFAALVLFAAFE  | Negative |
| P69241 | FAAFEAPTMVEAQKLCERPS  | Negative |
| P69241 | APTMVEAQKLCERPSGTWSG  | Negative |
| P69241 | IIALLFAALVLFAAFEAPTMV | Negative |
| P69241 | MAKFASIIALLFAALVLFAA  | Negative |
| P69770 | SEFSSEFCEQPEERICSCST  | Negative |
| P69770 | VALGMVATVICSCDSEFSSE  | Negative |
| P69770 | ATVICSCDSEFSSEFCEQPE  | Negative |
| P69770 | VATVICSCDSEFSSEFCEQP  | Negative |
| P69770 | VICSCDSEFSSEFCEQPEER  | Negative |
| P69770 | LGMVATVICSCDSEFSSEFC  | Negative |
| P69770 | LLSIVALGMVATVICSCDS   | Negative |
| P69770 | GHTSVSFLLSIVALGMVAT   | Negative |
| P69770 | CDSEFSSEFCEQPEERICSC  | Negative |
| P69770 | IVALGMVATVICSCDSEFSS  | Negative |
| P69770 | MFGHTSVSFLLSIVALGMV   | Negative |

|        |                       |          |
|--------|-----------------------|----------|
| P69770 | DSEFSSEFCEQPEERICSCS  | Negative |
| P69770 | SIVALGMVATVICSCDSEFS  | Negative |
| P69770 | VSFLLLSIVALGMVATVICS  | Negative |
| P69770 | TSVSFLLLSIVALGMVATVI  | Negative |
| P69770 | FGHTSVSFLLLSIVALGMVA  | Negative |
| P69770 | ICSCDSEFSSEFCEQPEERI  | Negative |
| P69770 | SVSFLLLSIVALGMVATVIC  | Negative |
| P69770 | MVATVICSCDSEFSSEFCEQ  | Negative |
| P69770 | LSIVALGMVATVICSCDSEF  | Negative |
| P69770 | CSCDSEFSSEFCEQPEERIC  | Negative |
| P69770 | GMVATVICSCDSEFSSEFCE  | Negative |
| P69770 | HTSVSFLLLSIVALGMVATV  | Negative |
| P69770 | EFSSSEFCEQPEERICSCSTH | Negative |
| P69770 | ALGMVATVICSCDSEFSSEF  | Negative |
| P69770 | FLLLSIVALGMVATVICSCD  | Negative |
| P69770 | SCDSEFSSEFCEQPEERICS  | Negative |
| P69770 | SFLLLSIVALGMVATVICSC  | Negative |
| P69770 | TVICSCDSEFSSEFCEQPEE  | Negative |
| P74917 | MTYQHSMYQSRTFLLFSAL   | Negative |
| P74917 | YLSQDRLRNKENDTMTYQHS  | Negative |
| P74917 | NDTMTYQHSMYQSRTFLLF   | Negative |
| P74917 | RLRNKENDTMTYQHSMYQS   | Negative |
| P74917 | QSRTFLLFSALLLVAGQASA  | Negative |
| P74917 | MYQSRTFLLFSALLLVAGQA  | Negative |
| P74917 | SKMYQSRTFLLFSALLLVAG  | Negative |
| P74917 | LSQDRLRNKENDTMTYQHSK  | Negative |
| P74917 | KMYQSRTFLLFSALLLVAGQ  | Negative |
| P74917 | DRLRNKENDTMTYQHSMYQ   | Negative |
| P74917 | SQDRLRNKENDTMTYQHSM   | Negative |
| P74917 | RNKENDTMTYQHSMYQSRT   | Negative |
| P74917 | TFLLFSALLLVAGQASAAVG  | Negative |
| P74917 | QDRLRNKENDTMTYQHSMY   | Negative |
| P74917 | YQHSMYQSRTFLLFSALLL   | Negative |
| P74917 | TMTYQHSMYQSRTFLLFSA   | Negative |
| P74917 | ENDTMTYQHSMYQSRTFLL   | Negative |
| P74917 | TYQHSMYQSRTFLLFSALL   | Negative |
| P74917 | MTTYLSQDRLRNKENDTMTY  | Negative |
| P74917 | YQSRTFLLFSALLLVAGQAS  | Negative |
| P74917 | SRTFLLFSALLLVAGQASAA  | Negative |
| P74917 | NKENDTMTYQHSMYQSRTF   | Negative |
| P74917 | KENDTMTYQHSMYQSRTFL   | Negative |
| P74917 | LRNKENDTMTYQHSMYQSR   | Negative |
| P74917 | HSKMYQSRTFLLFSALLLV   | Negative |
| P74917 | QHSMYQSRTFLLFSALLLV   | Negative |
| P74917 | DTMTYQHSMYQSRTFLLFS   | Negative |
| P74917 | RTFLLFSALLLVAGQASAAV  | Negative |

|        |                      |          |
|--------|----------------------|----------|
| P74917 | TYLSQDRLRNKENDTMTYQH | Negative |
| P74917 | TTYLSQDRLRNKENDTMTYQ | Negative |
| P76172 | LLLALASPAVLAAPGSCERI | Negative |
| P76172 | LLALASPAVLAAPGSCERIQ | Negative |
| P76172 | VLAAPGSCERIQSDISQRII | Negative |
| P76172 | SPAVLAAPGSCERIQSDISQ | Negative |
| P76172 | SCERIQSDISQRIINNGVPE | Negative |
| P76172 | APGSCERIQSDISQRIINNG | Negative |
| P76172 | LALASPAVLAAPGSCERIQS | Negative |
| P76172 | CCAALLLALASPAVLAAPGS | Negative |
| P76172 | IQSDISQRIINNGVPESST  | Negative |
| P76172 | TCCAALLLALASPAVLAAPG | Negative |
| P76172 | LAAPGSCERIQSDISQRIIN | Negative |
| P76172 | LASPAVLAAPGSCERIQSDI | Negative |
| P76172 | GSCERIQSDISQRIINNGVP | Negative |
| P76172 | PAVLAAPGSCERIQSDISQR | Negative |
| P76172 | LSTCCAALLLALASPAVLAA | Negative |
| P76172 | ASPAVLAAPGSCERIQSDIS | Negative |
| P76172 | CERIQSDISQRIINNGVPES | Negative |
| P76172 | QSDISQRIINNGVPESSTL  | Negative |
| P76172 | AALLLALASPAVLAAPGSCE | Negative |
| P76172 | PGSCERIQSDISQRIINNGV | Negative |
| P76172 | ALLLALASPAVLAAPGSCER | Negative |
| P76172 | AVLAAPGSCERIQSDISQRI | Negative |
| P76172 | RIQSDISQRIINNGVPESST | Negative |
| P76172 | MKLSTCCAALLLALASPAVL | Negative |
| P76172 | STCCAALLLALASPAVLAAP | Negative |
| P76172 | ALASPAVLAAPGSCERIQSD | Negative |
| P76172 | KLSTCCAALLLALASPAVLA | Negative |
| P76172 | ERIQSDISQRIINNGVPES  | Negative |
| P76172 | AAPGSCERIQSDISQRIINN | Negative |
| P76341 | NILSVHILNQQTGKPAADVT | Negative |
| P76341 | LSVHILNQQTGKPAADVTVT | Negative |
| P76341 | SLVNAAQQNILSVHILNQQT | Negative |
| P76341 | LSVATAAFSLPSLVNAAQQN | Negative |
| P76341 | TAAFSLSLVNAAQQNILSV  | Negative |
| P76341 | VATAAFSLPSLVNAAQQNIL | Negative |
| P76341 | AQQNILSVHILNQQTGKPAA | Negative |
| P76341 | ATAAFSLPSLVNAAQQNILS | Negative |
| P76341 | AFSLPSLVNAAQQNILSVHI | Negative |
| P76341 | SVHILNQQTGKPAADVTVTL | Negative |
| P76341 | YLVLSVATAAFSLPSLVNAA | Negative |
| P76341 | LPSLVNAAQQNILSVHILNQ | Negative |
| P76341 | QNILSVHILNQQTGKPAADV | Negative |
| P76341 | KRYLVLSVATAAFSLPSLVN | Negative |
| P76341 | SLPSLVNAAQQNILSVHILN | Negative |

|        |                      |          |
|--------|----------------------|----------|
| P76341 | VNAAQQNILSVHILNQQTGK | Negative |
| P76341 | AAQQNILSVHILNQQTGKPA | Negative |
| P76341 | MLKRYLVLSVATAAFSLPSL | Negative |
| P76341 | LVNAAQQNILSVHILNQQTG | Negative |
| P76341 | LVLVATAAFSLPSLVNAAQ  | Negative |
| P76341 | VLSVATAAFSLPSLVNAAQQ | Negative |
| P76341 | RYLVLSVATAAFSLPSLVNA | Negative |
| P76341 | AAFSLPVLNAAQQNILSVH  | Negative |
| P76341 | FSLPSLVNAAQQNILSVHIL | Negative |
| P76341 | LKRYLVLSVATAAFSLPSLV | Negative |
| P76341 | PSLVNAAQQNILSVHILNQQ | Negative |
| P76341 | ILSVHILNQQTGKPAADVTV | Negative |
| P76341 | QQNILSVHILNQQTGKPAAD | Negative |
| P76341 | NAAQQNILSVHILNQQTGKP | Negative |
| P76342 | KRRQVLKALGISATLSLPH  | Negative |
| P76342 | VLKALGISATLSLPHAAHA  | Negative |
| P76342 | KESDVTAEVFFMKRRQVLK  | Negative |
| P76342 | MKKNQFLKESDVTAEVFFM  | Negative |
| P76342 | FLKESDVTAEVFFMKRRQV  | Negative |
| P76342 | ESVFFMKRRQVLKALGISAT | Negative |
| P76342 | RQVLKALGISATLSLPHAA  | Negative |
| P76342 | NQFLKESDVTAEVFFMKRR  | Negative |
| P76342 | KNQFLKESDVTAEVFFMKR  | Negative |
| P76342 | SVFFMKRRQVLKALGISATA | Negative |
| P76342 | FMKRRQVLKALGISATLSL  | Negative |
| P76342 | KALGISATLSLPHAAHADL  | Negative |
| P76342 | KKNQFLKESDVTAEVFFMK  | Negative |
| P76342 | VTAESVFFMKRRQVLKALGI | Negative |
| P76342 | LKESDVTAEVFFMKRRQVL  | Negative |
| P76342 | QFLKESDVTAEVFFMKRRQ  | Negative |
| P76342 | TAESVFFMKRRQVLKALGIS | Negative |
| P76342 | DVTAEVFFMKRRQVLKALG  | Negative |
| P76342 | AESVFFMKRRQVLKALGISA | Negative |
| P76342 | LKALGISATLSLPHAAHAD  | Negative |
| P76342 | LGISATLSLPHAAHADLLS  | Negative |
| P76342 | SDVTAEVFFMKRRQVLKAL  | Negative |
| P76342 | QVLKALGISATLSLPHAAH  | Negative |
| P76342 | MKRRQVLKALGISATLSLP  | Negative |
| P76342 | ESDVTAEVFFMKRRQVLKA  | Negative |
| P76342 | RRQVLKALGISATLSLPHA  | Negative |
| P76342 | VFFMKRRQVLKALGISATAL | Negative |
| P76342 | ALGISATLSLPHAAHADLL  | Negative |
| P76342 | FFMKRRQVLKALGISATLS  | Negative |
| P76344 | ALGVFIVSAPAFSHGHSHG  | Negative |
| P76344 | HSHGKPLTEVEQKAANGVFD | Negative |
| P76344 | IVSAPAFSHGHSHGKPLTE  | Negative |

|        |                       |          |
|--------|-----------------------|----------|
| P76344 | IRLYKLAVALGVFIVSAPAF  | Negative |
| P76344 | RLYKLAVALGVFIVSAPAFS  | Negative |
| P76344 | LGVFIVSAPAFSHGHSHGK   | Negative |
| P76344 | GHHSHGKPLTEVEQKAANGV  | Negative |
| P76344 | PAFSHGHSHGKPLTEVEQK   | Negative |
| P76344 | VSAPAFSHGHSHGKPLTEV   | Negative |
| P76344 | LYKLAVALGVFIVSAPAFSH  | Negative |
| P76344 | HGKPLTEVEQKAANGVFDDA  | Negative |
| P76344 | VFIVSAPAFSHGHSHGKPL   | Negative |
| P76344 | GVFIVSAPAFSHGHSHGKP   | Negative |
| P76344 | APAFSHGHSHGKPLTEVEQ   | Negative |
| P76344 | FIVSAPAFSHGHSHGKPLT   | Negative |
| P76344 | MAIRLYKLAVALGVFIVSAP  | Negative |
| P76344 | AFSHGHSHGKPLTEVEQKA   | Negative |
| P76344 | LAVALGVFIVSAPAFSHGHH  | Negative |
| P76344 | SHGHSHGKPLTEVEQKAAN   | Negative |
| P76344 | GKPLTEVEQKAANGVFDDAN  | Negative |
| P76344 | SAPAFSHGHSHGKPLTEVE   | Negative |
| P76344 | YKLAVALGVFIVSAPAFSHG  | Negative |
| P76344 | HGHSHGKPLTEVEQKAANG   | Negative |
| P76344 | SHGKPLTEVEQKAANGVFDD  | Negative |
| P76344 | FSHGHSHGKPLTEVEQKAA   | Negative |
| P76344 | VALGVFIVSAPAFSHGHSH   | Negative |
| P76344 | AIRLYKLAVALGVFIVSAPA  | Negative |
| P76344 | HHSHGKPLTEVEQKAANGVF  | Negative |
| P76344 | KLAVALGVFIVSAPAFSHGH  | Negative |
| P76520 | AQQQTQQVQQTQKTA AAAER | Negative |
| P76520 | LIMATMVTAILASSTVWAAD  | Negative |
| P76520 | ADNAPVAAQQQTQQVQQTQK  | Negative |
| P76520 | NAPVAAQQQTQQVQQTQKTA  | Negative |
| P76520 | WAADNAPVAAQQQTQQVQQT  | Negative |
| P76520 | AADNAPVAAQQQTQQVQQTQ  | Negative |
| P76520 | DNAPVAAQQQTQQVQQTQKT  | Negative |
| P76520 | VTAILASSTVWAADNAPVAA  | Negative |
| P76520 | LASSTVWAADNAPVAAQQQT  | Negative |
| P76520 | TVWAADNAPVAAQQQTQQVQ  | Negative |
| P76520 | TAILASSTVWAADNAPVAAQ  | Negative |
| P76520 | IMATMVTAILASSTVWAADN  | Negative |
| P76520 | APVAAQQQTQQVQQTQKTAA  | Negative |
| P76520 | RLIMATMVTAILASSTVWAA  | Negative |
| P76520 | AILASSTVWAADNAPVAAQQ  | Negative |
| P76520 | SSTVWAADNAPVAAQQQTQQ  | Negative |
| P76520 | QQQTQQVQQTQKTA AAAERI | Negative |
| P76520 | ASSTVWAADNAPVAAQQQTQ  | Negative |
| P76520 | ILASSTVWAADNAPVAAQQQ  | Negative |
| P76520 | VAAQQQTQQVQQTQKTA AAA | Negative |

|        |                      |          |
|--------|----------------------|----------|
| P76520 | MVTAILASSTVWAADNAPVA | Negative |
| P76520 | PVAAQQQTQQVQQTQKTAAA | Negative |
| P76520 | VWAADNAPVAAQQQTQQVQQ | Negative |
| P76520 | AAQQQTQQVQQTQKTAAAAE | Negative |
| P76520 | MKRLIMATMVTAILASSTVW | Negative |
| P76520 | STVWAADNAPVAAQQQTQQV | Negative |
| P76520 | TMVTAILASSTVWAADNAPV | Negative |
| P76520 | MATMVTAILASSTVWAADNA | Negative |
| P76520 | KRLIMATMVTAILASSTVWA | Negative |
| P76773 | AGAYVENREAYNLASDQGEV | Negative |
| P76773 | MKKINAILLSSLTSASVFA  | Negative |
| P76773 | SVFAGAYVENREAYNLASDQ | Negative |
| P76773 | REAYNLASDQGEVMLRVGYN | Negative |
| P76773 | NAIILLSSLTSASVFAGAYV | Negative |
| P76773 | SLTSASVFAGAYVENREAYN | Negative |
| P76773 | KKINAILLSSLTSASVFAG  | Negative |
| P76773 | NREAYNLASDQGEVMLRVGY | Negative |
| P76773 | YVENREAYNLASDQGEVMLR | Negative |
| P76773 | KINAILLSSLTSASVFAGA  | Negative |
| P76773 | SASVFAGAYVENREAYNLAS | Negative |
| P76773 | LSSLTSASVFAGAYVENREA | Negative |
| P76773 | EAYNLASDQGEVMLRVGYNF | Negative |
| P76773 | AYVENREAYNLASDQGEVML | Negative |
| P76773 | LLSSLTSASVFAGAYVENRE | Negative |
| P76773 | ASVFAGAYVENREAYNLASD | Negative |
| P76773 | IILLSSLTSASVFAGAYVEN | Negative |
| P76773 | LTSASVFAGAYVENREAYNL | Negative |
| P76773 | ENREAYNLASDQGEVMLRVG | Negative |
| P76773 | INAILLSSLTSASVFAGAY  | Negative |
| P76773 | FAGAYVENREAYNLASDQGE | Negative |
| P76773 | VFAGAYVENREAYNLASDQG | Negative |
| P76773 | YNLASDQGEVMLRVGYNFDM | Negative |
| P76773 | ILLSSLTSASVFAGAYVENR | Negative |
| P76773 | AYNLASDQGEVMLRVGYNFD | Negative |
| P76773 | VENREAYNLASDQGEVMLRV | Negative |
| P76773 | GAYVENREAYNLASDQGEVM | Negative |
| P76773 | TSASVFAGAYVENREAYNLA | Negative |
| P76773 | SSLTSASVFAGAYVENREAY | Negative |
| P77202 | EKQGITIIKTFDAPGGMKGY | Negative |
| P77202 | PAIAFAEELPAPVKAIEKQG | Negative |
| P77202 | APVKAIEKQGITIIKTFDAP | Negative |
| P77202 | EELPAPVKAIEKQGITIKT  | Negative |
| P77202 | AFAEELPAPVKAIEKQGITI | Negative |
| P77202 | LLPAIAFAEELPAPVKAIEK | Negative |
| P77202 | LKKILLALLPAIAFAEELP  | Negative |
| P77202 | ALLPAIAFAEELPAPVKAIE | Negative |



|        |                      |          |
|--------|----------------------|----------|
| P77202 | FAEELPAPVKAIEKQGITII | Negative |
| P77202 | AEELPAPVKAIEKQGITIHK | Negative |
| P77202 | MLKKILLALLPAIAFAEEL  | Negative |
| P77202 | AIEKQGITIHKTFDAPGGMK | Negative |
| P77202 | LPAPVKAIEKQGITIHKTFD | Negative |
| P77202 | AIAFAEELPAPVKAIEKQGI | Negative |
| P77202 | PVKAIEKQGITIHKTFDAPG | Negative |
| P77202 | LLLALLPAIAFAEELPAPVK | Negative |
| P77202 | IEKQGITIHKTFDAPGGMKG | Negative |
| P77202 | KAIEKQGITIHKTFDAPGGM | Negative |
| P77202 | IAFAEELPAPVKAIEKQGIT | Negative |
| P77202 | VKAIEKQGITIHKTFDAPGG | Negative |
| P77202 | LALLPAIAFAEELPAPVKAI | Negative |
| P77202 | QGITIHKTFDAPGGMKGYL  | Negative |
| P77202 | ELPAPVKAIEKQGITIHKTF | Negative |
| P77202 | PAPVKAIEKQGITIHKTFDA | Negative |
| P77202 | LPAIAFAEELPAPVKAIEKQ | Negative |
| P77202 | ILLALLPAIAFAEELPAPV  | Negative |
| P77202 | KQGITIHKTFDAPGGMKGYL | Negative |
| P77202 | KILLALLPAIAFAEELPAP  | Negative |
| P77202 | LLALLPAIAFAEELPAPVKA | Negative |
| P77214 | MKKALQVAMFSLFTVIGFNA | Negative |
| P77214 | MFSLFTVIGFNAQANEHHHE | Negative |
| P77214 | QANEHHHETMSEAQPQVISA | Negative |
| P77214 | TVIGFNAQANEHHHETMSEA | Negative |
| P77214 | SLFTVIGFNAQANEHHHETM | Negative |
| P77214 | HETMSEAQPQVISATGVVKG | Negative |
| P77214 | TMSEAQPQVISATGVVKGID | Negative |
| P77214 | KKALQVAMFSLFTVIGFNAQ | Negative |
| P77214 | HHETMSEAQPQVISATGVVK | Negative |
| P77214 | ANEHHHETMSEAQPQVISAT | Negative |
| P77214 | GFNAQANEHHHETMSEAQPQ | Negative |
| P77214 | FSLFTVIGFNAQANEHHHET | Negative |
| P77214 | ALQVAMFSLFTVIGFNAQAN | Negative |
| P77214 | KALQVAMFSLFTVIGFNAQA | Negative |
| P77214 | AQANEHHHETMSEAQPQVIS | Negative |
| P77214 | AMFSLFTVIGFNAQANEHHH | Negative |
| P77214 | NAQANEHHHETMSEAQPQVI | Negative |
| P77214 | HHHETMSEAQPQVISATGVV | Negative |
| P77214 | IGFNAQANEHHHETMSEAQP | Negative |
| P77214 | MSEAQPQVISATGVVKGIDL | Negative |
| P77214 | QVAMFSLFTVIGFNAQANEH | Negative |
| P77214 | VIGFNAQANEHHHETMSEAQ | Negative |
| P77214 | ETMSEAQPQVISATGVVKG  | Negative |
| P77214 | EHHHETMSEAQPQVISATGV | Negative |
| P77214 | NEHHHETMSEAQPQVISATG | Negative |

|        |                       |          |
|--------|-----------------------|----------|
| P77214 | FNAQANEHHHETMSEAQPQV  | Negative |
| P77214 | FTVIGFNAQANEHHHETMSE  | Negative |
| P77214 | LFTVIGFNAQANEHHHETMS  | Negative |
| P77214 | LQVAMFSLFTVIGFNAQANE  | Negative |
| P77269 | LGSALFARAAEKEMTIGAIY  | Negative |
| P77269 | MATLLGSALFARAAEKEMTI  | Negative |
| P77269 | TRNLLMATLLGSALFARAA   | Negative |
| P77269 | TTRNLLMATLLGSALFARA   | Negative |
| P77269 | PTKMRTTRNLLMATLLGSA   | Negative |
| P77269 | ARAAEKEMTIGAIYLDTQGY  | Negative |
| P77269 | GSALFARAAEKEMTIGAIYL  | Negative |
| P77269 | KMRTTRNLLMATLLGSALF   | Negative |
| P77269 | KEMTIGAIYLDTQGY YAGVR | Negative |
| P77269 | RAAEKEMTIGAIYLDTQGY   | Negative |
| P77269 | LLGSALFARAAEKEMTIGAI  | Negative |
| P77269 | TKMRTTRNLLMATLLGSAL   | Negative |
| P77269 | NLLMATLLGSALFARAAEK   | Negative |
| P77269 | TLLGSALFARAAEKEMTIGA  | Negative |
| P77269 | EKEMTIGAIYLDTQGY YAGV | Negative |
| P77269 | RTRNLLMATLLGSALFAR    | Negative |
| P77269 | MRTTRNLLMATLLGSALFA   | Negative |
| P77269 | LLMATLLGSALFARAAEKE   | Negative |
| P77269 | AAEKEMTIGAIYLDTQGY YA | Negative |
| P77269 | AEKEMTIGAIYLDTQGY YAG | Negative |
| P77269 | RNLLMATLLGSALFARAAE   | Negative |
| P77269 | ALFARAAEKEMTIGAIYLDT  | Negative |
| P77269 | ATLLGSALFARAAEKEMTIG  | Negative |
| P77269 | LFARAAEKEMTIGAIYLDTQ  | Negative |
| P77269 | MPTKMRTTRNLLMATLLGS   | Negative |
| P77269 | LMATLLGSALFARAAEKEMT  | Negative |
| P77269 | EMTIGAIYLDTQGY YAGVRQ | Negative |
| P77269 | FARAAEKEMTIGAIYLDTQG  | Negative |
| P77269 | SALFARAAEKEMTIGAIYLD  | Negative |
| P77348 | CALLVSSISLSYAAEVPSGT  | Negative |
| P77348 | AAEVPSGTVLAEKQELVRHI  | Negative |
| P77348 | VSVTCCALLVSSISLSYAAE  | Negative |
| P77348 | ISLSYAAEVPSGTVLAEKQE  | Negative |
| P77348 | GTVLAEKQELVRHIKDEPAS  | Negative |
| P77348 | LLVSSISLSYAAEVPSGTVL  | Negative |
| P77348 | SYAAEVPSGTVLAEKQELVR  | Negative |
| P77348 | HSVSVTCCALLVSSISLSYA  | Negative |
| P77348 | CCALLVSSISLSYAAEVPSG  | Negative |
| P77348 | MKHSVSVTCCALLVSSISLS  | Negative |
| P77348 | SLSYAAEVPSGTVLAEKQEL  | Negative |
| P77348 | KHSVSVTCCALLVSSISLSY  | Negative |
| P77348 | LVSSISLSYAAEVPSGTVLA  | Negative |

|        |                      |          |
|--------|----------------------|----------|
| P77348 | SVSVTCCALLVSSISLSYAA | Negative |
| P77348 | LSYAAEVPSGTVLAEKQELV | Negative |
| P77348 | SISLSYAAEVPSGTVLAEKQ | Negative |
| P77348 | PSGTVLAEKQELVRHIKDEP | Negative |
| P77348 | ALLVSSISLSYAAEVPSGTV | Negative |
| P77348 | AEVPSGTVLAEKQELVRHIK | Negative |
| P77348 | YAAEVPSGTVLAEKQELVRH | Negative |
| P77348 | VPSGTVLAEKQELVRHIKDE | Negative |
| P77348 | EVPSGTVLAEKQELVRHIKD | Negative |
| P77348 | SGTVLAEKQELVRHIKDEPA | Negative |
| P77348 | VTCCALLVSSISLSYAAEVP | Negative |
| P77348 | SVTCCALLVSSISLSYAAEV | Negative |
| P77348 | VSSISLSYAAEVPSGTVLAE | Negative |
| P77348 | TVLAEKQELVRHIKDEPASL | Negative |
| P77348 | VLAEKQELVRHIKDEPASLD | Negative |
| P77348 | SSISLSYAAEVPSGTVLAEK | Negative |
| P77747 | AAGAAHAAEVYNKDGNKLDL | Negative |
| P77747 | MKSKVLALLIPALLAAGAAH | Negative |
| P77747 | EVYNKDGNKLDLYGKVDGLH | Negative |
| P77747 | LALLIPALLAAGAAHAAEVY | Negative |
| P77747 | VYNKDGNKLDLYGKVDGLHY | Negative |
| P77747 | HAAEVYNKDGNKLDLYGKVD | Negative |
| P77747 | LLIPALLAAGAAHAAEVYNK | Negative |
| P77747 | ALLAAGAAHAAEVYNKDGNK | Negative |
| P77747 | KDGNKLDLYGKVDGLHYFSD | Negative |
| P77747 | AGAAHAAEVYNKDGNKLDLY | Negative |
| P77747 | KSKVLALLIPALLAAGAAHA | Negative |
| P77747 | LAAGAAHAAEVYNKDGNKLD | Negative |
| P77747 | AHAAEVYNKDGNKLDLYGKV | Negative |
| P77747 | LIPALLAAGAAHAAEVYNKD | Negative |
| P77747 | DGNKLDLYGKVDGLHYFSDN | Negative |
| P77747 | AEVYNKDGNKLDLYGKVDGL | Negative |
| P77747 | NKDGNKLDLYGKVDGLHYFS | Negative |
| P77747 | IPALLAAGAAHAAEVYNKDG | Negative |
| P77747 | YNKDGNKLDLYGKVDGLHYF | Negative |
| P77747 | AAHAAEVYNKDGNKLDLYGK | Negative |
| P77747 | PALLAAGAAHAAEVYNKDGN | Negative |
| P77747 | VLALLIPALLAAGAAHAAEV | Negative |
| P77747 | SKVLALLIPALLAAGAAHAA | Negative |
| P77747 | AAEVYNKDGNKLDLYGKVDG | Negative |
| P77747 | NKLDLYGKVDGLHYFSDNSA | Negative |
| P77747 | LLAAGAAHAAEVYNKDGNKL | Negative |
| P77747 | GAAHAAEVYNKDGNKLDLYG | Negative |
| P77747 | GNKLDLYGKVDGLHYFSDNS | Negative |
| P77747 | KVLALLIPALLAAGAAHAAE | Negative |
| P77754 | TALFVASTLALGAANLAHAA | Negative |

|        |                       |          |
|--------|-----------------------|----------|
| P77754 | LALGAANLAHAADTTTAAPA  | Negative |
| P77754 | ALFVASTLALGAANLAHAAD  | Negative |
| P77754 | NLAHAADTTTAAPADAKPMM  | Negative |
| P77754 | ALGAANLAHAADTTTAAPAD  | Negative |
| P77754 | TTAAPADAKPMMHHKGKFGP  | Negative |
| P77754 | TTTAAPADAKPMMHHKGKFG  | Negative |
| P77754 | TAAPADAKPMMHHKGKFGPH  | Negative |
| P77754 | APADAKPMMHHKGKFGPHQD  | Negative |
| P77754 | LTALFVASTLALGAANLAHA  | Negative |
| P77754 | LGAANLAHAADTTTAAPADA  | Negative |
| P77754 | AADTTTAAPADAKPMMHHKG  | Negative |
| P77754 | HAADTTTAAPADAKPMMHHK  | Negative |
| P77754 | KLTALFVASTLALGAANLAH  | Negative |
| P77754 | STLALGAANLAHAADTTTAA  | Negative |
| P77754 | ADTTTAAPADAKPMMHHKGK  | Negative |
| P77754 | FVASTLALGAANLAHAADTT  | Negative |
| P77754 | RKLTALFVASTLALGAANLA  | Negative |
| P77754 | AAPADAKPMMHHKGKFGPHQ  | Negative |
| P77754 | AHAADTTTAAPADAKPMMHH  | Negative |
| P77754 | ANLAHAADTTTAAPADAKPM  | Negative |
| P77754 | LAHAADTTTAAPADAKPMMH  | Negative |
| P77754 | TLALGAANLAHAADTTTAAP  | Negative |
| P77754 | MRKLTALFVASTLALGAANL  | Negative |
| P77754 | ASTLALGAANLAHAADTTTA  | Negative |
| P77754 | AANLAHAADTTTAAPADAKP  | Negative |
| P77754 | LFVASTLALGAANLAHAADT  | Negative |
| P77754 | GAANLAHAADTTTAAPADAK  | Negative |
| P77754 | DTTTAAPADAKPMMHHKGKF  | Negative |
| P78556 | CGESEAASNFDCCCLGYTDRI | Negative |
| P78556 | LAALMSVLLLHLCGESEAAS  | Negative |
| P78556 | LHLCGESEAASNFDCCCLGYT | Negative |
| P78556 | SEAASNFDCCCLGYTDRILHP | Negative |
| P78556 | GESEAASNFDCCCLGYTDRIL | Negative |
| P78556 | LCGESEAASNFDCCCLGYTDR | Negative |
| P78556 | TKSLLLAALMSVLLLHLCGE  | Negative |
| P78556 | LLLHLCGESEAASNFDCCCLG | Negative |
| P78556 | EAASNFDCCCLGYTDRILHPK | Negative |
| P78556 | SLLLAALMSVLLLHLCGESE  | Negative |
| P78556 | HLCGESEAASNFDCCCLGYTD | Negative |
| P78556 | ESEAASNFDCCCLGYTDRILH | Negative |
| P78556 | LLAALMSVLLLHLCGESEAA  | Negative |
| P78556 | VLLLHLCGESEAASNFDCCCL | Negative |
| P78556 | SVLLLHLCGESEAASNFDCC  | Negative |
| P78556 | CCTKSLLLAALMSVLLLHLC  | Negative |
| P78556 | ASNFDCCCLGYTDRILHPKFI | Negative |
| P78556 | LLLAALMSVLLLHLCGESEA  | Negative |

|        |                       |          |
|--------|-----------------------|----------|
| P78556 | ALMSVLLLHLCGESEAASNF  | Negative |
| P78556 | KSLLLAALMSVLLLHLCGES  | Negative |
| P78556 | LLHLCGESEAASNFDCCCLGY | Negative |
| P78556 | FDCCLGYTDRILHPKFIVGF  | Negative |
| P78556 | MSVLLLHLCGESEAASNFDCC | Negative |
| P78556 | CTKSLLLAALMSVLLLHLCG  | Negative |
| P78556 | AASNFDCCCLGYTDRILHPKF | Negative |
| P78556 | SNFDCCCLGYTDRILHPKFIV | Negative |
| P78556 | NFDCCCLGYTDRILHPKFIVG | Negative |
| P78556 | AALMSVLLLHLCGESEAASN  | Negative |
| P78556 | MCCTKSLLLAALMSVLLLHL  | Negative |
| P78581 | TVSNVKAALPANGTLLGISM  | Negative |
| P78581 | DVCTVSNVKAALPANGTLLG  | Negative |
| P78581 | ALAAGANAASFTDVCTVSNV  | Negative |
| P78581 | VSNVKAALPANGTLLGISML  | Negative |
| P78581 | AAGANAASFTDVCTVSNVKA  | Negative |
| P78581 | CTVSNVKAALPANGTLLGIS  | Negative |
| P78581 | RMAVAALAAGANAASFTDVC  | Negative |
| P78581 | AVAALAAGANAASFTDVCTV  | Negative |
| P78581 | SNVKAALPANGTLLGISMLP  | Negative |
| P78581 | MRQHSRMAVAALAAGANAAS  | Negative |
| P78581 | FTDVCTVSNVKAALPANGTL  | Negative |
| P78581 | VKAALPANGTLLGISMLPSA  | Negative |
| P78581 | RQHSRMAVAALAAGANAASF  | Negative |
| P78581 | AGANAASFTDVCTVSNVKA   | Negative |
| P78581 | ASFTDVCTVSNVKAALPANG  | Negative |
| P78581 | SFTDVCTVSNVKAALPANGT  | Negative |
| P78581 | NAASFTDVCTVSNVKAALPA  | Negative |
| P78581 | AASFTDVCTVSNVKAALPAN  | Negative |
| P78581 | SRMAVAALAAGANAASFTDV  | Negative |
| P78581 | VCTVSNVKAALPANGTLLGI  | Negative |
| P78581 | QHSRMAVAALAAGANAASFT  | Negative |
| P78581 | LAAGANAASFTDVCTVSNVK  | Negative |
| P78581 | MAVAALAAGANAASFTDVCT  | Negative |
| P78581 | GANAAASFTDVCTVSNVKAAL | Negative |
| P78581 | AALAAGANAASFTDVCTVSN  | Negative |
| P78581 | VAAALAAGANAASFTDVCTVS | Negative |
| P78581 | ANAASFTDVCTVSNVKAALP  | Negative |
| P78581 | NVKAALPANGTLLGISMLPS  | Negative |
| P78581 | TDVCTVSNVKAALPANGTLL  | Negative |
| P78733 | SLLALVALAAVTSAAPATTQ  | Negative |
| P78733 | VTSAAPATTQATCPDGTKVN  | Negative |
| P78733 | APATTQATCPDGTKVNNAAC  | Negative |
| P78733 | PDGTKVNNAACCAFIPLAQD  | Negative |
| P78733 | ALAAVTSAAPATTQATCPDG  | Negative |
| P78733 | DGTKVNNAACCAFIPLAQDL  | Negative |

|        |                       |          |
|--------|-----------------------|----------|
| P78733 | MAFASSLLALVALAAVTSAA  | Negative |
| P78733 | LLALVALAAVTSAAPATTQA  | Negative |
| P78733 | ATCPDGTKVNNAACCAFIPL  | Negative |
| P78733 | TQATCPDGTKVNNAACCAFI  | Negative |
| P78733 | AAVTSAAPATTQATCPDGTK  | Negative |
| P78733 | LVALAAVTSAAPATTQATCP  | Negative |
| P78733 | SAAPATTQATCPDGTKVNNA  | Negative |
| P78733 | FASSLLALVALAAVTSAAPA  | Negative |
| P78733 | PATTQATCPDGTKVNNAACC  | Negative |
| P78733 | ASSLLALVALAAVTSAAPAT  | Negative |
| P78733 | AVTSAAPATTQATCPDGTKV  | Negative |
| P78733 | ATTQATCPDGTKVNNAACCA  | Negative |
| P78733 | TSAAPATTQATCPDGTKVNN  | Negative |
| P78733 | ALVALAAVTSAAPATTQATC  | Negative |
| P78733 | LALVALAAVTSAAPATTQAT  | Negative |
| P78733 | LAAVTSAAPATTQATCPDGT  | Negative |
| P78733 | QATCPDGTKVNNAACCAFIPL | Negative |
| P78733 | TCPDGTKVNNAACCAFIPLA  | Negative |
| P78733 | SSLLALVALAAVTSAAPATT  | Negative |
| P78733 | TTQATCPDGTKVNNAACCAF  | Negative |
| P78733 | CPDGTKVNNAACCAFIPLAQ  | Negative |
| P78733 | AFASSLLALVALAAVTSAAP  | Negative |
| P78733 | AAPATTQATCPDGTKVNNA   | Negative |
| P79208 | ANPCCSHPCQNRGVCMSVGF  | Negative |
| P79208 | ALLCAAVVCGAANPCCSHPC  | Negative |
| P79208 | SHPCQNRGVCMSVGFDQYKC  | Negative |
| P79208 | AVVCGAANPCCSHPCQNRGV  | Negative |
| P79208 | HPCQNRGVCMSVGFDQYKCD  | Negative |
| P79208 | CQNRGVCMSVGFDQYKCDCT  | Negative |
| P79208 | NPCCSHPCQNRGVCMSVGFD  | Negative |
| P79208 | PCQNRGVCMSVGFDQYKCD   | Negative |
| P79208 | VCGAANPCCSHPCQNRGVC   | Negative |
| P79208 | AANPCCSHPCQNRGVCMSVG  | Negative |
| P79208 | MLARALLCAAVVCGAANPC   | Negative |
| P79208 | NRGVCMSVGFDQYKCDCTRT  | Negative |
| P79208 | CAAVVCGAANPCCSHPCQNR  | Negative |
| P79208 | LLCAAVVCGAANPCCSHPCQ  | Negative |
| P79208 | PCCSHPCQNRGVCMSVGFDQ  | Negative |
| P79208 | LLLCAAVVCGAANPCCSHPC  | Negative |
| P79208 | ARALLCAAVVCGAANPCCS   | Negative |
| P79208 | GAANPCCSHPCQNRGVCMSV  | Negative |
| P79208 | AAVVCGAANPCCSHPCQNRG  | Negative |
| P79208 | GVCMSVGFDQYKCDCTRTGF  | Negative |
| P79208 | CSHPCQNRGVCMSVGFDQYK  | Negative |
| P79208 | CGAANPCCSHPCQNRGVCMS  | Negative |
| P79208 | CCSHPCQNRGVCMSVGFDQY  | Negative |

|        |                       |          |
|--------|-----------------------|----------|
| P79208 | VCMSVGFDQYKCDCTRRTGFY | Negative |
| P79208 | VVCGAANPCCSHPCQNRGVC  | Negative |
| P79208 | QNRGVCMSVGFDQYKCDCTR  | Negative |
| P79208 | RGVCMSVGFDQYKCDCTRRTG | Negative |
| P79208 | LCAAVVCGAANPCCSHPCQN  | Negative |
| P79208 | RALLLCAAVVCGAANPCCSH  | Negative |
| P79263 | NDINIYSLTVDSKVSSRFAH  | Negative |
| P79263 | GYGLLLVLPLLLAVLQSTTA  | Negative |
| P79263 | KTLSPTGYGLLLVLPLLLAV  | Negative |
| P79263 | VLPLLLAVLQSTTAHKNDIN  | Negative |
| P79263 | TGYGLLLVLPLLLAVLQSTT  | Negative |
| P79263 | TTAHKNDINIYSLTVDSKVS  | Negative |
| P79263 | LLLVLPLLLAVLQSTTAHKN  | Negative |
| P79263 | PTGYGLLLVLPLLLAVLQST  | Negative |
| P79263 | LLAVLQSTTAHKNDINIYS   | Negative |
| P79263 | MKTLSPTGYGLLLVLPLLLA  | Negative |
| P79263 | PLLLAVLQSTTAHKNDINIY  | Negative |
| P79263 | LPLLLAVLQSTTAHKNDINI  | Negative |
| P79263 | LSPTGYGLLLVLPLLLAVLQ  | Negative |
| P79263 | LAVLQSTTAHKNDINIYSLT  | Negative |
| P79263 | AVLQSTTAHKNDINIYSLTV  | Negative |
| P79263 | LQSTTAHKNDINIYSLTVDS  | Negative |
| P79263 | SPTGYGLLLVLPLLLAVLQS  | Negative |
| P79263 | LLVLPLLLAVLQSTTAHKND  | Negative |
| P79263 | AHKNDINIYSLTVDSKVSSR  | Negative |
| P79263 | KNDINIYSLTVDSKVSSRFA  | Negative |
| P79263 | STTAHKNDINIYSLTVDSKV  | Negative |
| P79263 | LLAVLQSTTAHKNDINIYSL  | Negative |
| P79263 | TAHKNDINIYSLTVDSKVSS  | Negative |
| P79263 | QSTTAHKNDINIYSLTVDSK  | Negative |
| P79263 | YGLLLVLPLLLAVLQSTTAH  | Negative |
| P79263 | GLLLVLPLLLAVLQSTTAHK  | Negative |
| P79263 | TLSPTGYGLLLVLPLLLAVL  | Negative |
| P79263 | HKNDINIYSLTVDSKVSSRF  | Negative |
| P79263 | VLQSTTAHKNDINIYSLTV   | Negative |
| P80022 | NSAFSLFLILLIITQCLSVL  | Negative |
| P80022 | FLILLIITQCLSVLNAAKDF  | Negative |
| P80022 | TQCLSVLNAAKDFDFFYFVQ  | Negative |
| P80022 | LSVLNAAKDFDFFYFVQQWP  | Negative |
| P80022 | LFLILLIITQCLSVLNAAKD  | Negative |
| P80022 | SLFLILLIITQCLSVLNAAK  | Negative |
| P80022 | SVLNAAKDFDFFYFVQQWPG  | Negative |
| P80022 | DFFYFVQQWPGSYCDTKQSC  | Negative |
| P80022 | AAKDFDFFYFVQQWPGSYCD  | Negative |
| P80022 | DFDFFYFVQQWPGSYCDTKQ  | Negative |
| P80022 | LNAAKDFDFFYFVQQWPGSY  | Negative |

|        |                      |          |
|--------|----------------------|----------|
| P80022 | AKDFDFFYFVQQWPGSYCDT | Negative |
| P80022 | CLSVLNAAKDFDFFYFVQQW | Negative |
| P80022 | SNSAFSLFLILLIITQCLSV | Negative |
| P80022 | AFSLFLILLIITQCLSVLNA | Negative |
| P80022 | ILLIITQCLSVLNAAKDFDF | Negative |
| P80022 | ASNSAFSLFLILLIITQCLS | Negative |
| P80022 | MASNSAFSLFLILLIITQCL | Negative |
| P80022 | VLNAAKDFDFFYFVQQWPGS | Negative |
| P80022 | KDFDFFYFVQQWPGSYCDTK | Negative |
| P80022 | QCLSVLNAAKDFDFFYFVQQ | Negative |
| P80022 | IITQCLSVLNAAKDFDFFYF | Negative |
| P80022 | NAAKDFDFFYFVQQWPGSYC | Negative |
| P80022 | ITQCLSVLNAAKDFDFFYFV | Negative |
| P80022 | FSLFLILLIITQCLSVLNAA | Negative |
| P80022 | LLIITQCLSVLNAAKDFDFF | Negative |
| P80022 | LIITQCLSVLNAAKDFDFFY | Negative |
| P80022 | SAFSLFLILLIITQCLSVLN | Negative |
| P80022 | FDFYFVQQWPGSYCDTKQS  | Negative |
| P80035 | TNPEVTMNISQMITYWGYP  | Negative |
| P80035 | LGTTHGLFGKLHPTNPEVTM | Negative |
| P80035 | SVISTLGTTHGLFGKLHPTN | Negative |
| P80035 | KLHPTNPEVTMNISQMITYW | Negative |
| P80035 | LHPTNPEVTMNISQMITYWG | Negative |
| P80035 | GKLHPTNPEVTMNISQMITY | Negative |
| P80035 | MWLLLTAASVISTLGTTHGL | Negative |
| P80035 | PTNPEVTMNISQMITYWGYP | Negative |
| P80035 | VISTLGTTHGLFGKLHPTNP | Negative |
| P80035 | LLTAASVISTLGTTHGLFGK | Negative |
| P80035 | HGLFGKLHPTNPEVTMNISQ | Negative |
| P80035 | EVTMNISQMITYWGYPAEY  | Negative |
| P80035 | LLTAASVISTLGTTHGLFG  | Negative |
| P80035 | TAASVISTLGTTHGLFGKLH | Negative |
| P80035 | LFGKLHPTNPEVTMNISQMI | Negative |
| P80035 | ISTLGTTHGLFGKLHPTNPE | Negative |
| P80035 | WLLLTAASVISTLGTTHGLF | Negative |
| P80035 | THGLFGKLHPTNPEVTMNIS | Negative |
| P80035 | ASVISTLGTTHGLFGKLHPT | Negative |
| P80035 | GLFGKLHPTNPEVTMNISQM | Negative |
| P80035 | PEVTMNISQMITYWGYPAAE | Negative |
| P80035 | NPEVTMNISQMITYWGYPAE | Negative |
| P80035 | STLGTTHGLFGKLHPTNPEV | Negative |
| P80035 | HPTNPEVTMNISQMITYWGY | Negative |
| P80035 | FGKLHPTNPEVTMNISQMIT | Negative |
| P80035 | TLGTTHGLFGKLHPTNPEVT | Negative |
| P80035 | GTTHGLFGKLHPTNPEVTMN | Negative |
| P80035 | TTHGLFGKLHPTNPEVTMNI | Negative |



|        |                       |          |
|--------|-----------------------|----------|
| P80035 | AASVISTLGTTHGLFGKLHP  | Negative |
| P80036 | IADGGRTARAGGSVRPPRRP  | Negative |
| P80036 | PPRRPPASHTAWGLPRGRPT  | Negative |
| P80036 | MQFGIVAAIADGGRTARAGG  | Negative |
| P80036 | AGGSVRPPRRPPASHTAWGL  | Negative |
| P80036 | RPPRRPPASHTAWGLPRGRP  | Negative |
| P80036 | QFGIVAAIADGGRTARAGGS  | Negative |
| P80036 | RTARAGGSVRPPRRPPASHT  | Negative |
| P80036 | GSVRPPRRPPASHTAWGLPR  | Negative |
| P80036 | ARAGGSVRPPRRPPASHTAW  | Negative |
| P80036 | RPPASHTAWGLPRGRPTGQP  | Negative |
| P80036 | ASHTAWGLPRGRPTGQPHAT  | Negative |
| P80036 | GGRTARAGGSVRPPRRPPAS  | Negative |
| P80036 | DGGRTARAGGSVRPPRRPPA  | Negative |
| P80036 | PPRRPPASHTAWGLPRGRPTG | Negative |
| P80036 | GGSVRPPRRPPASHTAWGLP  | Negative |
| P80036 | TARAGGSVRPPRRPPASHTA  | Negative |
| P80036 | PPASHTAWGLPRGRPTGQPH  | Negative |
| P80036 | GRTARAGGSVRPPRRPPASH  | Negative |
| P80036 | AIADGGRTARAGGSVRPPRR  | Negative |
| P80036 | VRPPRRPPASHTAWGLPRGR  | Negative |
| P80036 | FGIVAAIADGGRTARAGGSV  | Negative |
| P80036 | VAAIADGGRTARAGGSVRPP  | Negative |
| P80036 | IVAAIADGGRTARAGGSVRP  | Negative |
| P80036 | PASHTAWGLPRGRPTGQPHA  | Negative |
| P80036 | ADGGRTARAGGSVRPPRRPP  | Negative |
| P80036 | GIVAAIADGGRTARAGGSVR  | Negative |
| P80036 | RRPPASHTAWGLPRGRPTGQ  | Negative |
| P80036 | SVRPPRRPPASHTAWGLPRG  | Negative |
| P80036 | AAIADGGRTARAGGSVRPPR  | Negative |
| P80036 | RAGGSVRPPRRPPASHTAWG  | Negative |
| P80060 | EEKCTPGQVKQQDCNTCTCT  | Negative |
| P80060 | KCTPGQVKQQDCNTCTCTPT  | Negative |
| P80060 | ALALCAAVLLVVLVQAEEKC  | Negative |
| P80060 | AEEKCTPGQVKQQDCNTCTC  | Negative |
| P80060 | CTPGQVKQQDCNTCTCTPTG  | Negative |
| P80060 | ALCAAVLLVVLVQAEEKCTP  | Negative |
| P80060 | VLVQAEEKCTPGQVKQQDCN  | Negative |
| P80060 | VVLVQAEEKCTPGQVKQQDC  | Negative |
| P80060 | LVQAEEKCTPGQVKQQDCNT  | Negative |
| P80060 | VLLVVLVQAEEKCTPGQVKQ  | Negative |
| P80060 | KQQDCNTCTCTPTGVWGCTR  | Negative |
| P80060 | AVLLVVLVQAEEKCTPGQVK  | Negative |
| P80060 | TPGQVKQQDCNTCTCTPTGV  | Negative |
| P80060 | EKCTPGQVKQQDCNTCTCTP  | Negative |
| P80060 | PGQVKQQDCNTCTCTPTGVW  | Negative |

|        |                      |          |
|--------|----------------------|----------|
| P80060 | VKQQDCNTCTCTPTGVWGCT | Negative |
| P80060 | QVKQQDCNTCTCTPTGVWGC | Negative |
| P80060 | QAEKCTPGQVKQQDCNTCT  | Negative |
| P80060 | FALALCAAVLLVVLVQAEK  | Negative |
| P80060 | AAVLLVVLVQAEKCTPGQV  | Negative |
| P80060 | KFALALCAAVLLVVLVQAE  | Negative |
| P80060 | CAAVLLVVLVQAEKCTPGQ  | Negative |
| P80060 | LLVVLVQAEKCTPGQVKQQ  | Negative |
| P80060 | LVVLVQAEKCTPGQVKQQD  | Negative |
| P80060 | QQDCNTCTCTPTGVWGCTRK | Negative |
| P80060 | LCAAVLLVVLVQAEKCTPG  | Negative |
| P80060 | VQAEKCTPGQVKQQDCNTC  | Negative |
| P80060 | GQVKQQDCNTCTCTPTGVWG | Negative |
| P80060 | MKFALALCAAVLLVVLVQAE | Negative |
| P80067 | LRAALLVLLGVCTVSSDTP  | Negative |
| P80067 | VLLGVCTVSSDTPANCTYPD | Negative |
| P80067 | LVLLGVCTVSSDTPANCTYP | Negative |
| P80067 | GPWTHSLRAALLVLLGVCT  | Negative |
| P80067 | THSLRAALLVLLGVCTVSS  | Negative |
| P80067 | TVSSDTPANCTYPDLLGTWV | Negative |
| P80067 | WTHSLRAALLVLLGVCTVS  | Negative |
| P80067 | MGPWTHSLRAALLVLLGVC  | Negative |
| P80067 | LLGVCTVSSDTPANCTYPDL | Negative |
| P80067 | SLRAALLVLLGVCTVSSDT  | Negative |
| P80067 | HSLRAALLVLLGVCTVSSD  | Negative |
| P80067 | TPANCTYPDLLGTWVFQVGP | Negative |
| P80067 | SDTPANCTYPDLLGTWVFQV | Negative |
| P80067 | NCTYPDLLGTWVFQVGPRHP | Negative |
| P80067 | RAALLVLLGVCTVSSDTPA  | Negative |
| P80067 | SSDTPANCTYPDLLGTWVFQ | Negative |
| P80067 | LGVCTVSSDTPANCTYPDLL | Negative |
| P80067 | DTPANCTYPDLLGTWVFQVG | Negative |
| P80067 | ANCTYPDLLGTWVFQVGPRH | Negative |
| P80067 | CTVSSDTPANCTYPDLLGTW | Negative |
| P80067 | CTYPDLLGTWVFQVGPRHPR | Negative |
| P80067 | GVCTVSSDTPANCTYPDLLG | Negative |
| P80067 | PANCTYPDLLGTWVFQVGPR | Negative |
| P80067 | VSSDTPANCTYPDLLGTWVF | Negative |
| P80067 | ALLVLLGVCTVSSDTPANC  | Negative |
| P80067 | VCTVSSDTPANCTYPDLLGT | Negative |
| P80067 | PWTHSLRAALLVLLGVCTV  | Negative |
| P80067 | LLVLLGVCTVSSDTPANCTY | Negative |
| P80067 | LLLVLLGVCTVSSDTPANCT | Negative |
| P80090 | VSITRGTQHTCSILSRPHP  | Negative |
| P80090 | TLTKAFMVTVFLTLLNVS   | Negative |
| P80090 | TKAFMVTVFLTLLNVSITR  | Negative |

|        |                      |          |
|--------|----------------------|----------|
| P80090 | ASVHLTLTKAFMVTVFLTLL | Negative |
| P80090 | TRGTTQHTCSILSRPHPRGL | Negative |
| P80090 | SITRGTTQHTCSILSRPHPR | Negative |
| P80090 | LTLNVSITRGTTQHTCSI   | Negative |
| P80090 | VFLTLLNVSITRGTTQHTC  | Negative |
| P80090 | LTLTKAFMVTVFLTLLNVS  | Negative |
| P80090 | LNVSITRGTTQHTCSILSRP | Negative |
| P80090 | RGTTQHTCSILSRPHPRGLC | Negative |
| P80090 | ITRGTTQHTCSILSRPHPRG | Negative |
| P80090 | MVTVFLTLLNVSITRGTTQ  | Negative |
| P80090 | VTVFLTLLNVSITRGTTQH  | Negative |
| P80090 | LTKAFMVTVFLTLLNVSIT  | Negative |
| P80090 | GTTQHTCSILSRPHPRGLCG | Negative |
| P80090 | KAFMVTVFLTLLNVSITRG  | Negative |
| P80090 | HLTLTKAFMVTVFLTLLNV  | Negative |
| P80090 | LLNVSITRGTTQHTCSILS  | Negative |
| P80090 | MASVHLTLTKAFMVTVFLTL | Negative |
| P80090 | FMVTVFLTLLNVSITRGTT  | Negative |
| P80090 | SVHLTLTKAFMVTVFLTLL  | Negative |
| P80090 | AFMVTVFLTLLNVSITRG   | Negative |
| P80090 | VHLTLTKAFMVTVFLTLLN  | Negative |
| P80090 | TTQHTCSILSRPHPRGLCGS | Negative |
| P80090 | FLTLLNVSITRGTTQHTCS  | Negative |
| P80090 | TLLNVSITRGTTQHTCSIL  | Negative |
| P80090 | NVSITRGTTQHTCSILSRPH | Negative |
| P80090 | LLNVSITRGTTQHTCSILSR | Negative |
| P80098 | GLAQPVGINTSTTCCYRFIN | Negative |
| P80098 | LCLLLTAAAFSPQGLAQPVG | Negative |
| P80098 | NTSTTCCYRFINKKIPKQRL | Negative |
| P80098 | KASAALLCLLLTAAAFSPQG | Negative |
| P80098 | INTSTTCCYRFINKKIPKQR | Negative |
| P80098 | LLCLLLTAAAFSPQGLAQP  | Negative |
| P80098 | QPVGINTSTTCCYRFINKKI | Negative |
| P80098 | LAQPVGINTSTTCCYRFINK | Negative |
| P80098 | PQGLAQPVGINTSTTCCYRF | Negative |
| P80098 | SPQGLAQPVGINTSTTCCYR | Negative |
| P80098 | AFSPQGLAQPVGINTSTTCC | Negative |
| P80098 | AAAFSPQGLAQPVGINTSTT | Negative |
| P80098 | ASAALLCLLLTAAAFSPQGL | Negative |
| P80098 | QGLAQPVGINTSTTCCYRFI | Negative |
| P80098 | MKASAALLCLLLTAAAFSPQ | Negative |
| P80098 | AAFSPQGLAQPVGINTSTTC | Negative |
| P80098 | AQPVGINTSTTCCYRFINKK | Negative |
| P80098 | LLLTAAAFSPQGLAQPVGIN | Negative |
| P80098 | TAAAFSPQGLAQPVGINTST | Negative |
| P80098 | FSPQGLAQPVGINTSTTCCY | Negative |

|        |                       |          |
|--------|-----------------------|----------|
| P80098 | GINTSTTCCYRFINKKIPKQ  | Negative |
| P80098 | LTAAAFSPQGLAQPVGINTS  | Negative |
| P80098 | TSTTCCYRFINKKIPKQRLE  | Negative |
| P80098 | LLTAAAFSPQGLAQPVGIN   | Negative |
| P80098 | VGINSTTCCYRFINKKIPK   | Negative |
| P80098 | AALLCLLLTAAAFSPQGLAQ  | Negative |
| P80098 | SAALLCLLLTAAAFSPQGLA  | Negative |
| P80098 | ALLCLLLTAAAFSPQGLAQP  | Negative |
| P80098 | PVGINTSTTCCYRFINKKIP  | Negative |
| P80109 | PCGISTHIEIGHRALEFLHL  | Negative |
| P80109 | IEIGHRALEFLHLQDGSINY  | Negative |
| P80109 | AFRFWSGLLMLLGFLCPRSS  | Negative |
| P80109 | STHIEIGHRALEFLHLQDGS  | Negative |
| P80109 | PRSSPCGISTHIEIGHRALE  | Negative |
| P80109 | GISTHIEIGHRALEFLHLQD  | Negative |
| P80109 | LLGFLCPRSSPCGISTHIEI  | Negative |
| P80109 | GFLCPRSSPCGISTHIEIGH  | Negative |
| P80109 | MSAFRFWSGLLMLLGFLCPR  | Negative |
| P80109 | LCPRSSPCGISTHIEIGHRA  | Negative |
| P80109 | SAFRFWSGLLMLLGFLCPRS  | Negative |
| P80109 | FLCPRSSPCGISTHIEIGHR  | Negative |
| P80109 | ISTHIEIGHRALEFLHLQDG  | Negative |
| P80109 | LMLLGFLCPRSSPCGISTHI  | Negative |
| P80109 | LLMLLGFLCPRSSPCGISTH  | Negative |
| P80109 | WSGLLMLLGFLCPRSSPCGI  | Negative |
| P80109 | SSPCGISTHIEIGHRALEFL  | Negative |
| P80109 | HIEIGHRALEFLHLQDGSIN  | Negative |
| P80109 | LGFLCPRSSPCGISTHIEIG  | Negative |
| P80109 | CGISTHIEIGHRALEFLHLQ  | Negative |
| P80109 | RSSPCGISTHIEIGHRALEF  | Negative |
| P80109 | SPCGISTHIEIGHRALEFLH  | Negative |
| P80109 | FRFWSGLLMLLGFLCPRSSP  | Negative |
| P80109 | RFWSGLLMLLGFLCPRSSPC  | Negative |
| P80109 | SGLLMLLGFLCPRSSPCGIS  | Negative |
| P80109 | CPRSSPCGISTHIEIGHRAL  | Negative |
| P80109 | FWSGLLMLLGFLCPRSSPCG  | Negative |
| P80109 | MLLGFLCPRSSPCGISTHIE  | Negative |
| P80109 | THIEIGHRALEFLHLQDGS   | Negative |
| P80162 | LLLTTPPGPLASAGPVSAVLT | Negative |
| P80162 | LLLLLTTPPGPLASAGPVSAV | Negative |
| P80162 | RVPGPSGSLCALLALLLLLT  | Negative |
| P80162 | VPGPSGSLCALLALLLLLT   | Negative |
| P80162 | PPGPLASAGPVSAVLTELRC  | Negative |
| P80162 | ALLALLLLLTTPPGPLASAGP | Negative |
| P80162 | LLLLTPPGPLASAGPVSAVL  | Negative |
| P80162 | TPPGPLASAGPVSAVLTEL   | Negative |

|        |                      |          |
|--------|----------------------|----------|
| P80162 | ARVPGPSGSLCALLALLLLL | Negative |
| P80162 | SRAARVPGPSGSLCALLALL | Negative |
| P80162 | PSGSLCALLALLLLLTPPGP | Negative |
| P80162 | LTPPGPLASAGPVSAVLTEL | Negative |
| P80162 | MSLPSSRAARVPGPSGSLCA | Negative |
| P80162 | PGPSGSLCALLALLLLLTPP | Negative |
| P80162 | LALLLLLTPPGPLASAGPVS | Negative |
| P80162 | GPSGSLCALLALLLLLTPPG | Negative |
| P80162 | SLCALLALLLLLTPPGPLAS | Negative |
| P80162 | PSSRAARVPGPSGSLCALLA | Negative |
| P80162 | CALLALLLLLTPPGPLASAG | Negative |
| P80162 | LLTPPGPLASAGPVSAVLTE | Negative |
| P80162 | LLALLLLLTPPGPLASAGPV | Negative |
| P80162 | SGSLCALLALLLLLTPPGPL | Negative |
| P80162 | SLPSSRAARVPGPSGSLCAL | Negative |
| P80162 | RAARVPGPSGSLCALLALLL | Negative |
| P80162 | SSRAARVPGPSGSLCALLAL | Negative |
| P80162 | LPSSRAARVPGPSGSLCALL | Negative |
| P80162 | AARVPGPSGSLCALLALLL  | Negative |
| P80162 | LCALLALLLLLTPPGPLASA | Negative |
| P80162 | GSLCALLALLLLLTPPGPLA | Negative |
| P80188 | TSDLIPAPPLSKVPLQQNFQ | Negative |
| P80188 | LGALHAQAQDSTSDLIPAPP | Negative |
| P80188 | DLIPAPPLSKVPLQQNFQDN | Negative |
| P80188 | SDLIPAPPLSKVPLQQNFQD | Negative |
| P80188 | QAQDSTSDLIPAPPLSKVPL | Negative |
| P80188 | LLGALHAQAQDSTSDLIPAP | Negative |
| P80188 | AQDSTSDLIPAPPLSKVPLQ | Negative |
| P80188 | APPLSKVPLQQNFQDNQFQG | Negative |
| P80188 | LGLALLGALHAQAQDSTSDL | Negative |
| P80188 | MPLGLLWLGLALLGALHAQA | Negative |
| P80188 | GLLWLGLALLGALHAQAQDS | Negative |
| P80188 | LGLLWLGLALLGALHAQAQD | Negative |
| P80188 | STSDLIPAPPLSKVPLQQNF | Negative |
| P80188 | LALLGALHAQAQDSTSDLIP | Negative |
| P80188 | GALHAQAQDSTSDLIPAPPL | Negative |
| P80188 | ALLGALHAQAQDSTSDLIPA | Negative |
| P80188 | PAPPLSKVPLQQNFQDNQFQ | Negative |
| P80188 | QDSTSDLIPAPPLSKVPLQQ | Negative |
| P80188 | IPAPPLSKVPLQQNFQDNQF | Negative |
| P80188 | LLWLGLALLGALHAQAQDST | Negative |
| P80188 | PLGLLWLGLALLGALHAQAQ | Negative |
| P80188 | WLGLALLGALHAQAQDSTSD | Negative |
| P80188 | LHAQAQDSTSDLIPAPPLSK | Negative |
| P80188 | AQAQDSTSDLIPAPPLSKVP | Negative |
| P80188 | DSTSDLIPAPPLSKVPLQQN | Negative |

|        |                      |          |
|--------|----------------------|----------|
| P80188 | HAQAQDSTSDLIPAPPLSKV | Negative |
| P80188 | GLALLGALHAQAQDSTSDLI | Negative |
| P80188 | LIPAPPLSKVPLQQNFQDNQ | Negative |
| P80188 | ALHAQAQDSTSDLIPAPPLS | Negative |
| P80195 | THLEAQPTDASAQFIRNLQI | Negative |
| P80195 | AATSLAILNKPEDETHLEAQ | Negative |
| P80195 | VLLLASLAATSLAILNKPED | Negative |
| P80195 | ASLAATSLAILNKPEDETHL | Negative |
| P80195 | ILNKPEDETHLEAQPTDASA | Negative |
| P80195 | LLLASLAATSLAILNKPEDE | Negative |
| P80195 | CVLLLASLAATSLAILNKPE | Negative |
| P80195 | LNKPEDETHLEAQPTDASAQ | Negative |
| P80195 | ATSLAILNKPEDETHLEAQP | Negative |
| P80195 | TSLAILNKPEDETHLEAQPT | Negative |
| P80195 | LASLAATSLAILNKPEDETH | Negative |
| P80195 | SLAATSLAILNKPEDETHLE | Negative |
| P80195 | KFLCVLLLASLAATSLAILN | Negative |
| P80195 | SLAILNKPEDETHLEAQPTD | Negative |
| P80195 | LAILNKPEDETHLEAQPTDA | Negative |
| P80195 | NKPEDETHLEAQPTDASAQF | Negative |
| P80195 | AILNKPEDETHLEAQPTDAS | Negative |
| P80195 | PEDETHLEAQPTDASAQFIR | Negative |
| P80195 | DETHLEAQPTDASAQFIRNL | Negative |
| P80195 | LAATSLAILNKPEDETHLEA | Negative |
| P80195 | ETHLEAQPTDASAQFIRNLQ | Negative |
| P80195 | EAQPTDASAQFIRNLQISNE | Negative |
| P80195 | EDETHLEAQPTDASAQFIRN | Negative |
| P80195 | MKFLCVLLLASLAATSLAIL | Negative |
| P80195 | HLEAQPTDASAQFIRNLQIS | Negative |
| P80195 | LEAQPTDASAQFIRNLQISN | Negative |
| P80195 | KPEDETHLEAQPTDASAQFI | Negative |
| P80195 | LLASLAATSLAILNKPEDET | Negative |
| P80195 | FLCVLLLASLAATSLAILNK | Negative |
| P80221 | AARVSGPSGSLCALLALLL  | Negative |
| P80221 | ALLLTPPGPLASAGPVAAV  | Negative |
| P80221 | CALLALLLTPPGPLASAGP  | Negative |
| P80221 | LLLTPPGPLASAGPVAAVV  | Negative |
| P80221 | ALLALLLTPPGPLASAGPV  | Negative |
| P80221 | GPSGSLCALLALLLTPPGP  | Negative |
| P80221 | TPPGPLASAGPVAAVVREL  | Negative |
| P80221 | LCALLALLLTPPGPLASAG  | Negative |
| P80221 | SGPSGSLCALLALLLTPPG  | Negative |
| P80221 | SRAARVSGPSGSLCALLALL | Negative |
| P80221 | PPGPLASAGPVAAVVRELRC | Negative |
| P80221 | GSLCALLALLLTPPGPLAS  | Negative |
| P80221 | RVSGPSGSLCALLALLLTP  | Negative |

|        |                       |          |
|--------|-----------------------|----------|
| P80221 | MRLSSRAARVSGPSGSLCA   | Negative |
| P80221 | LLSSRAARVSGPSGSLCALL  | Negative |
| P80221 | PSGSLCALLALLLTTPPGPL  | Negative |
| P80221 | SLCALLALLLTTPPGPLASA  | Negative |
| P80221 | LLTTPPGPLASAGPVAAVVR  | Negative |
| P80221 | SSRAARVSGPSGSLCALLAL  | Negative |
| P80221 | LLALLLTTPPGPLASAGPVA  | Negative |
| P80221 | PGPLASAGPVAAVVRELRCV  | Negative |
| P80221 | RAARVSGPSGSLCALLALL   | Negative |
| P80221 | LSSRAARVSGPSGSLCALLA  | Negative |
| P80221 | RLLSSRAARVSGPSGSLCAL  | Negative |
| P80221 | LTPPGPLASAGPVAAVVREL  | Negative |
| P80221 | VSGPSGSLCALLALLLTTP   | Negative |
| P80221 | LLTTPPGPLASAGPVAAVVRE | Negative |
| P80221 | ARVSGPSGSLCALLALLLT   | Negative |
| P80221 | SGSLCALLALLLTTPPGPLA  | Negative |
| P80245 | VVTIVCLDLGYTLKCNQLIP  | Negative |
| P80245 | IPPFYKTCAAGKNLCYKMFM  | Negative |
| P80245 | LDLGYTLKCNQLIPPFYKTC  | Negative |
| P80245 | KCNQLIPPFYKTCAAGKNLC  | Negative |
| P80245 | TLLTLVVVTIVCLDLGYTL   | Negative |
| P80245 | LTLVVVTIVCLDLGYTLKCN  | Negative |
| P80245 | VVVTIVCLDLGYTLKCNQLI  | Negative |
| P80245 | LKCNQLIPPFYKTCAAGKNL  | Negative |
| P80245 | VTIVCLDLGYTLKCNQLIPP  | Negative |
| P80245 | NQLIPPFYKTCAAGKNLCYK  | Negative |
| P80245 | IVCLDLGYTLKCNQLIPPFY  | Negative |
| P80245 | DLGYTLKCNQLIPPFYKTCA  | Negative |
| P80245 | GYTLKCNQLIPPFYKTCAAG  | Negative |
| P80245 | VCLDLGYTLKCNQLIPPFYK  | Negative |
| P80245 | YTLKCNQLIPPFYKTCAAGK  | Negative |
| P80245 | MKTLTLVVVTIVCLDLGY    | Negative |
| P80245 | PFYKTCAAGKNLCYKMFMVA  | Negative |
| P80245 | KTLLTLVVVTIVCLDLGYT   | Negative |
| P80245 | LIPPFYKTCAAGKNLCYKMF  | Negative |
| P80245 | CNQLIPPFYKTCAAGKNLCY  | Negative |
| P80245 | TLKCNQLIPPFYKTCAAGKN  | Negative |
| P80245 | CLDLGYTLKCNQLIPPFYKT  | Negative |
| P80245 | QLIPPFYKTCAAGKNLCYKM  | Negative |
| P80245 | LLTLVVVTIVCLDLGYTLK   | Negative |
| P80245 | LGYTLKCNQLIPPFYKTCAA  | Negative |
| P80245 | TIVCLDLGYTLKCNQLIPPF  | Negative |
| P80245 | PPFYKTCAAGKNLCYKMFMV  | Negative |
| P80245 | LLTLVVVTIVCLDLGYTLKC  | Negative |
| P80245 | LVVVTIVCLDLGYTLKCNQL  | Negative |
| P80284 | SKVWISLLLALAVVLSAPAA  | Negative |

|        |                                           |          |
|--------|-------------------------------------------|----------|
| P80284 | SAPAARAE E E E E E E E A A P E            | Negative |
| P80284 | VLSAPAARAE E E E E E E E A A A            | Negative |
| P80284 | AISKVWISLLLALAVVLSAP                      | Negative |
| P80284 | ARAE E E E E E E E A A P E A V L T        | Negative |
| P80284 | E A A A A E E E A A P E A V L T L H A D   | Negative |
| P80284 | VWISLLLALAVVLSAPAARA                      | Negative |
| P80284 | LLLALAVVLSAPAARAE E E A A                 | Negative |
| P80284 | A E E A A A A E E A A P E A V L T L H     | Negative |
| P80284 | A A E E A A A P E A V L T L H A D N F D   | Negative |
| P80284 | A A R A E E A A A A E E A A P E A V L     | Negative |
| P80284 | E E A A A A E E A A P E A V L T L H A     | Negative |
| P80284 | A A A A E E A A A P E A V L T L H A D N   | Negative |
| P80284 | L A L A V V L S A P A A R A E E E A A A A | Negative |
| P80284 | A V V L S A P A A R A E E E A A A E E A   | Negative |
| P80284 | R A E E A A A A E E A A P E A V L T L     | Negative |
| P80284 | L S A P A A R A E E A A A A E E E A A P   | Negative |
| P80284 | WISLLLALAVVLSAPAARAE                      | Negative |
| P80284 | A P A A R A E E A A A A E E E A A P E A   | Negative |
| P80284 | ISKVWISLLLALAVVLSAPA                      | Negative |
| P80284 | SLLLALAVVLSAPAARAE E A                    | Negative |
| P80284 | ISLLLALAVVLSAPAARAE E                     | Negative |
| P80284 | P A A R A E E A A A A E E E A A P E A V   | Negative |
| P80284 | M A I S K V W I S L L L A L A V V L S A   | Negative |
| P80284 | A A A E E A A A P E A V L T L H A D N F   | Negative |
| P80284 | K V W I S L L L A L A V V L S A P A A R   | Negative |
| P80284 | L A V V L S A P A A R A E E A A A A E E   | Negative |
| P80284 | V V L S A P A A R A E E A A A A E E E A A | Negative |
| P80284 | A L A V V L S A P A A R A E E A A A A E   | Negative |
| P80311 | L L P G P S A A D E K K K G P K V T V K   | Negative |
| P80311 | F L L L P G P S A A D E K K K G P K V T   | Negative |
| P80311 | S E R N M K I L F V A A L V V G S V F F   | Negative |
| P80311 | E R N M K I L F V A A L V V G S V F F L   | Negative |
| P80311 | F F L L L P G P S A A D E K K K G P K V   | Negative |
| P80311 | P S A A D E K K K G P K V T V K V Y F D   | Negative |
| P80311 | A A L V V G S V F F L L L P G P S A A D   | Negative |
| P80311 | L V V G S V F F L L L P G P S A A D E K   | Negative |
| P80311 | V F F L L L P G P S A A D E K K K G P K   | Negative |
| P80311 | G S V F F L L L P G P S A A D E K K K G   | Negative |
| P80311 | P G P S A A D E K K K G P K V T V K V Y   | Negative |
| P80311 | M L R L S E R N M K I L F V A A L V V G   | Negative |
| P80311 | V V G S V F F L L L P G P S A A D E K K   | Negative |
| P80311 | L L L P G P S A A D E K K K G P K V T V   | Negative |
| P80311 | L P G P S A A D E K K K G P K V T V K V   | Negative |
| P80311 | N M K I L F V A A L V V G S V F F L L L   | Negative |
| P80311 | I L F V A A L V V G S V F F L L L P G P   | Negative |
| P80311 | R L S E R N M K I L F V A A L V V G S V   | Negative |



|        |                      |          |
|--------|----------------------|----------|
| P80311 | VAALVVGSVFFLLLPGPSAA | Negative |
| P80311 | KILFVAALVVGSVFFLLLP  | Negative |
| P80311 | LSERNMKILFVAALVVGSVF | Negative |
| P80311 | RNMKILFVAALVVGSVFFLL | Negative |
| P80311 | LRLSERNMKILFVAALVVGS | Negative |
| P80311 | LFVAALVVGSVFFLLLPGPS | Negative |
| P80311 | GPSAADEKKKGPKVTVKVYF | Negative |
| P80311 | SVFFLLLPGPSAADEKKKGP | Negative |
| P80311 | ALVVGSVFFLLLPGPSAADE | Negative |
| P80311 | MKILFVAALVVGSVFFLLLP | Negative |
| P80311 | FVAALVVGSVFFLLLPGPSA | Negative |
| P80325 | LLTVSAFSAQVLAHPGIPS  | Negative |
| P80325 | ACCFRVTNKKISFQRLKSYK | Negative |
| P80325 | TVSAFSAQVLAHPGIPSACC | Negative |
| P80325 | FSAQVLAHPGIPSACCFRVT | Negative |
| P80325 | AFSAQVLAHPGIPSACCFRV | Negative |
| P80325 | VSTAFLCLLLTVSAFSAQVL | Negative |
| P80325 | KVSTAFLCLLLTVSAFSAQV | Negative |
| P80325 | AQVLAHPGIPSACCFRVTNK | Negative |
| P80325 | PSACCFRVTNKKISFQRLKS | Negative |
| P80325 | STAFLCLLLTVSAFSAQVLA | Negative |
| P80325 | FLCLLLTVSAFSAQVLAHPG | Negative |
| P80325 | LTVSAFSAQVLAHPGIPSAC | Negative |
| P80325 | MKVSTAFLCLLLTVSAFSAQ | Negative |
| P80325 | SACCFRVTNKKISFQRLKSY | Negative |
| P80325 | GIPSACCFRVTNKKISFQRL | Negative |
| P80325 | HPGIPSACCFRVTNKKISFQ | Negative |
| P80325 | AHPGIPSACCFRVTNKKISF | Negative |
| P80325 | SAQVLAHPGIPSACCFRVTN | Negative |
| P80325 | LAHPGIPSACCFRVTNKKIS | Negative |
| P80325 | SAFSAQVLAHPGIPSACCFR | Negative |
| P80325 | VLAHPGIPSACCFRVTNKKI | Negative |
| P80325 | QVLAHPGIPSACCFRVTNKK | Negative |
| P80325 | LCLLLTVSAFSAQVLAHPGI | Negative |
| P80325 | LLTVSAFSAQVLAHPGIPSA | Negative |
| P80325 | VSAFSAQVLAHPGIPSACCF | Negative |
| P80325 | TAFLCLLLTVSAFSAQVLAH | Negative |
| P80325 | AFLCLLLTVSAFSAQVLAHP | Negative |
| P80325 | IPSACCFRVTNKKISFQRLK | Negative |
| P80325 | PGIPSACCFRVTNKKISFQR | Negative |
| P80356 | EQYQPYPEQQQPILQQQML  | Negative |
| P80356 | LLAMAATMATAQFDPSEQYQ | Negative |
| P80356 | TMATAQFDPSEQYQPYPEQQ | Negative |
| P80356 | DPSEQYQPYPEQQQPILQQQ | Negative |
| P80356 | YPEQQQPILQQQMLLQQQQ  | Negative |
| P80356 | AATMATAQFDPSEQYQPYPE | Negative |

|        |                      |          |
|--------|----------------------|----------|
| P80356 | TFLIFALLAMAATMATAQFD | Negative |
| P80356 | MATAQFDPSEQYQPYPEQQQ | Negative |
| P80356 | TAQFDPSEQYQPYPEQQQPI | Negative |
| P80356 | FALLAMAATMATAQFDPSEQ | Negative |
| P80356 | LAMAATMATAQFDPSEQYQP | Negative |
| P80356 | ALLAMAATMATAQFDPSEQY | Negative |
| P80356 | SEQYQPYPEQQQPILQQQQM | Negative |
| P80356 | FLIFALLAMAATMATAQFDP | Negative |
| P80356 | QPYPEQQQPILQQQQMLLQQ | Negative |
| P80356 | AMAATMATAQFDPSEQYQPY | Negative |
| P80356 | FDPSEQYQPYPEQQQPILQQ | Negative |
| P80356 | AQFDPSEQYQPYPEQQQPIL | Negative |
| P80356 | IFALLAMAATMATAQFDPSE | Negative |
| P80356 | ATMATAQFDPSEQYQPYPEQ | Negative |
| P80356 | YQPYPEQQQPILQQQQMLLQ | Negative |
| P80356 | MKTFLIFALLAMAATMATAQ | Negative |
| P80356 | PYPEQQQPILQQQQMLLQQQ | Negative |
| P80356 | QYQPYPEQQQPILQQQQMLL | Negative |
| P80356 | PSEQYQPYPEQQQPILQQQQ | Negative |
| P80356 | QFDPSEQYQPYPEQQQPILQ | Negative |
| P80356 | KTFLIFALLAMAATMATAQF | Negative |
| P80356 | ATAQFDPSEQYQPYPEQQQP | Negative |
| P80356 | MAATMATAQFDPSEQYQPYP | Negative |
| P80384 | DCGHGEVTELDITGCSGDTG | Negative |
| P80384 | KMTFKDCGHGEVTELDITGC | Negative |
| P80384 | VASAGKMTFKDCGHGEVTEL | Negative |
| P80384 | VAVASAGKMTFKDCGHGEVT | Negative |
| P80384 | ALFALVAVASAGKMTFKDCG | Negative |
| P80384 | GKMTFKDCGHGEVTELDITG | Negative |
| P80384 | ALVAVASAGKMTFKDCGHGE | Negative |
| P80384 | MMKFIALFALVAVASAGKMT | Negative |
| P80384 | LFALVAVASAGKMTFKDCGH | Negative |
| P80384 | TELDITGCSGDTCVIHRGEK | Negative |
| P80384 | ASAGKMTFKDCGHGEVTELD | Negative |
| P80384 | FIALFALVAVASAGKMTFKD | Negative |
| P80384 | FKDCGHGEVTELDITGCSGD | Negative |
| P80384 | MTFKDCGHGEVTELDITGCS | Negative |
| P80384 | EVTELDITGCSGDTCVIHRG | Negative |
| P80384 | LVAVASAGKMTFKDCGHGEV | Negative |
| P80384 | SAGKMTFKDCGHGEVTELDI | Negative |
| P80384 | VTELDITGCSGDTCVIHRGE | Negative |
| P80384 | AGKMTFKDCGHGEVTELDIT | Negative |
| P80384 | GHGEVTELDITGCSGDTCVI | Negative |
| P80384 | GEVTELDITGCSGDTCVIHR | Negative |
| P80384 | TFKDCGHGEVTELDITGCSG | Negative |
| P80384 | KFIALFALVAVASAGKMTFK | Negative |

|        |                      |          |
|--------|----------------------|----------|
| P80384 | HGEVTELDITGCSGDTCVIH | Negative |
| P80384 | FALVAVASAGKMTFKDCGHG | Negative |
| P80384 | IALFALVAVASAGKMTFKDC | Negative |
| P80384 | CGHGEVTELDITGCSGDTCV | Negative |
| P80384 | KDCGHGEVTELDITGCSGDT | Negative |
| P80384 | AVASAGKMTFKDCGHGEVTE | Negative |
| P80391 | GKREKCLRRNGFCAFLKCPT | Negative |
| P80391 | LAQGAAGSSLALGKREKCLR | Negative |
| P80391 | FILLLAQGAAGSSLALGKRE | Negative |
| P80391 | YLLFPFILLLAQGAAGSSLA | Negative |
| P80391 | LLFPFILLLAQGAAGSSLAL | Negative |
| P80391 | MRIVYLLFPFILLLAQGAAG | Negative |
| P80391 | SSLALGKREKCLRRNGFCAF | Negative |
| P80391 | GSSLALGKREKCLRRNGFCA | Negative |
| P80391 | QGAAGSSLALGKREKCLRRN | Negative |
| P80391 | LFPFILLLAQGAAGSSLALG | Negative |
| P80391 | PFILLLAQGAAGSSLALGKR | Negative |
| P80391 | LGKREKCLRRNGFCAFLKCP | Negative |
| P80391 | ALGKREKCLRRNGFCAFLKC | Negative |
| P80391 | AAGSSLALGKREKCLRRNGF | Negative |
| P80391 | RIVYLLFPFILLLAQGAAGS | Negative |
| P80391 | GAAGSSLALGKREKCLRRNG | Negative |
| P80391 | LLLAQGAAGSSLALGKREKC | Negative |
| P80391 | REKCLRRNGFCAFLKCPTLS | Negative |
| P80391 | IVYLLFPFILLLAQGAAGSS | Negative |
| P80391 | FPFILLLAQGAAGSSLALGK | Negative |
| P80391 | KCLRRNGFCAFLKCPTLSVI | Negative |
| P80391 | LLAQGAAGSSLALGKREKCL | Negative |
| P80391 | AGSSLALGKREKCLRRNGFC | Negative |
| P80391 | EKCLRRNGFCAFLKCPTLSV | Negative |
| P80391 | KREKCLRRNGFCAFLKCPTL | Negative |
| P80391 | AQGAAGSSLALGKREKCLRR | Negative |
| P80391 | LALGKREKCLRRNGFCAFLK | Negative |
| P80391 | SLALGKREKCLRRNGFCAFL | Negative |
| P80391 | VYLLFPFILLLAQGAAGSSL | Negative |
| P80392 | LLFLALQVSPGLSSPKRDML | Negative |
| P80392 | LALQVSPGLSSPKRDMLFCK | Negative |
| P80392 | LFSLLFLALQVSPGLSSPKR | Negative |
| P80392 | LFCKRGTCHFGRCPSHLIKV | Negative |
| P80392 | GLSSPKRDMLFCKRGTCHFG | Negative |
| P80392 | FLALQVSPGLSSPKRDMLFC | Negative |
| P80392 | KRDMLFCKRGTCHFGRCPSH | Negative |
| P80392 | YLLFSLFLALQVSPGLSSP  | Negative |
| P80392 | MRILYLLFSLFLALQVSPG  | Negative |
| P80392 | SPKRDMLFCKRGTCHFGRCP | Negative |
| P80392 | LLFSLFLALQVSPGLSSPK  | Negative |

|        |                      |          |
|--------|----------------------|----------|
| P80392 | SPGLSSPKRDMLFCKRGTC  | Negative |
| P80392 | LQVSPGLSSPKRDMLFCKRG | Negative |
| P80392 | RDMLFCKRGTCFGRCPSHL  | Negative |
| P80392 | PGLSSPKRDMLFCKRGTCF  | Negative |
| P80392 | DMLFCKRGTCFGRCPSHLI  | Negative |
| P80392 | SLLFLALQVSPGLSSPKRDM | Negative |
| P80392 | FCKRGTCFGRCPSHLIKVG  | Negative |
| P80392 | RILYLLFSLLFLALQVSPGL | Negative |
| P80392 | QVSPGLSSPKRDMLFCKRG  | Negative |
| P80392 | VSPGLSSPKRDMLFCKRGTC | Negative |
| P80392 | LSSPKRDMLFCKRGTCFGR  | Negative |
| P80392 | LYLLFSLLFLALQVSPGLSS | Negative |
| P80392 | ILYLLFSLLFLALQVSPGLS | Negative |
| P80392 | MLFCKRGTCFGRCPSHLIK  | Negative |
| P80392 | SSPKRDMLFCKRGTCFGR   | Negative |
| P80392 | PKRDMLFCKRGTCFGRCP   | Negative |
| P80392 | FSLLFLALQVSPGLSSPKRD | Negative |
| P80392 | LFLALQVSPGLSSPKRDMLF | Negative |
| P80401 | AAALLALAAPGFAATHEVHM | Negative |
| P80401 | AATHEVHMLNKGESGAMVFE | Negative |
| P80401 | LLALAAPGFAATHEVHMLNK | Negative |
| P80401 | ALLALAAPGFAATHEVHMLN | Negative |
| P80401 | MFHSLAAAAAALLALAAPG  | Negative |
| P80401 | AALLALAAPGFAATHEVHML | Negative |
| P80401 | HSLAAAAAALLALAAPGFAA | Negative |
| P80401 | HEVHMLNKGESGAMVFEPAF | Negative |
| P80401 | FHSLAAAAAALLALAAPGF  | Negative |
| P80401 | HHSLAAAAAALLALAAPGFA | Negative |
| P80401 | SLAAAAAALLALAAPGFAAT | Negative |
| P80401 | PGFAATHEVHMLNKGESGAM | Negative |
| P80401 | LALAAPGFAATHEVHMLNKG | Negative |
| P80401 | VHMLNKGESGAMVFEPAFVR | Negative |
| P80401 | AAAALLALAAPGFAATHEVH | Negative |
| P80401 | APGFAATHEVHMLNKGESGA | Negative |
| P80401 | ATHEVHMLNKGESGAMVFEP | Negative |
| P80401 | HMLNKGESGAMVFEPAFVRA | Negative |
| P80401 | FAATHEVHMLNKGESGAMVF | Negative |
| P80401 | AAAAAALLALAAPGFAATHE | Negative |
| P80401 | EVHMLNKGESGAMVFEPAFV | Negative |
| P80401 | ALAAPGFAATHEVHMLNKG  | Negative |
| P80401 | GFAATHEVHMLNKGESGAMV | Negative |
| P80401 | LAAPGFAATHEVHMLNKGES | Negative |
| P80401 | AAPGFAATHEVHMLNKGESG | Negative |
| P80401 | THEVHMLNKGESGAMVFEP  | Negative |
| P80401 | MLNKGESGAMVFEPAFVRAE | Negative |
| P80401 | LNKGESGAMVFEPAFVRAEP | Negative |

|        |                      |          |
|--------|----------------------|----------|
| P80401 | LAAAAAALLALAAPGFAATH | Negative |
| P80426 | VKWCVKSEQELRKCHDLAAK | Negative |
| P80426 | LLGCLATAYAAPAEGIVKWC | Negative |
| P80426 | MKLLLLSALLGCLATAYAAP | Negative |
| P80426 | VKSEQELRKCHDLAAKVAEF | Negative |
| P80426 | CLATAYAAPAEGIVKWCVK  | Negative |
| P80426 | GCLATAYAAPAEGIVKWCVK | Negative |
| P80426 | PAEGIVKWCVKSEQELRKCH | Negative |
| P80426 | KSEQELRKCHDLAAKVAEFS | Negative |
| P80426 | AEGIVKWCVKSEQELRKCHD | Negative |
| P80426 | APAEGIVKWCVKSEQELRK  | Negative |
| P80426 | AYAAPAEGIVKWCVKSEQEL | Negative |
| P80426 | EGIVKWCVKSEQELRKCHDL | Negative |
| P80426 | SALLGCLATAYAAPAEGIVK | Negative |
| P80426 | IVKWCVKSEQELRKCHDLAA | Negative |
| P80426 | ATAYAAPAEGIVKWCVKSEQ | Negative |
| P80426 | GIVKWCVKSEQELRKCHDLA | Negative |
| P80426 | LGCLATAYAAPAEGIVKWC  | Negative |
| P80426 | CVKSEQELRKCHDLAAKVAE | Negative |
| P80426 | LSALLGCLATAYAAPAEGIV | Negative |
| P80426 | LLLLSALLGCLATAYAAPAE | Negative |
| P80426 | YAAPAEGIVKWCVKSEQELR | Negative |
| P80426 | ALLGCLATAYAAPAEGIVKW | Negative |
| P80426 | AAPAEIVKWCVKSEQELRK  | Negative |
| P80426 | LATAYAAPAEGIVKWCVKSE | Negative |
| P80426 | KLLLLSALLGCLATAYAAPA | Negative |
| P80426 | LLSALLGCLATAYAAPAEGI | Negative |
| P80426 | WCVKSEQELRKCHDLAAKVA | Negative |
| P80426 | TAYAAPAEGIVKWCVKSEQE | Negative |
| P80426 | KWCVKSEQELRKCHDLAAKV | Negative |
| P80463 | MMRARVPLLLLGILFLASLS | Negative |
| P80463 | LASLSASFAISLREHNESQD | Negative |
| P80463 | SASFAISLREHNESQDNPFY | Negative |
| P80463 | ARVPLLLLGILFLASLSASF | Negative |
| P80463 | FAISLREHNESQDNPFYFSS | Negative |
| P80463 | ASLSASFAISLREHNESQDN | Negative |
| P80463 | PLLLLGILFLASLSASFAIS | Negative |
| P80463 | REHNESQDNPFYFSSDNSWQ | Negative |
| P80463 | MRARVPLLLLGILFLASLSA | Negative |
| P80463 | LREHNESQDNPFYFSSDNSW | Negative |
| P80463 | LGILFLASLSASFAISLREH | Negative |
| P80463 | AISLREHNESQDNPFYFSSD | Negative |
| P80463 | SFAISLREHNESQDNPFYFS | Negative |
| P80463 | SLREHNESQDNPFYFSSDNS | Negative |
| P80463 | FLASLSASFAISLREHNESQ | Negative |
| P80463 | VPLLLLGILFLASLSASFAI | Negative |

|        |                        |          |
|--------|------------------------|----------|
| P80463 | ASFAISLREHNESQDNPFYF   | Negative |
| P80463 | HNESQDNPFYFSSDNSWQTL   | Negative |
| P80463 | EHNESQDNPFYFSSDNSWQT   | Negative |
| P80463 | LFLASLSASFAISLREHNES   | Negative |
| P80463 | LLLLGILFLASLSASFAISL   | Negative |
| P80463 | LSASFAISLREHNESQDNPF   | Negative |
| P80463 | ISLREHNESQDNPFYFSSDN   | Negative |
| P80463 | ILFLASLSASFAISLREHNE   | Negative |
| P80463 | LLLGILFLASLSASFAISLR   | Negative |
| P80463 | RARVPLLLLILGILFLASLSAS | Negative |
| P80463 | SLSASFAISLREHNESQDNP   | Negative |
| P80463 | GILFLASLSASFAISLREHN   | Negative |
| P80463 | RVPLLLLILGILFLASLSASFA | Negative |
| P80513 | CISYLGRFYQDLKDRDVTFS   | Negative |
| P80513 | ATHGLAVALALSVLPASRAL   | Negative |
| P80513 | THGLAVALALSVLPASRALR   | Negative |
| P80513 | VALALSVLPASRALRQGDCE   | Negative |
| P80513 | CEVCISYLGRFYQDLKDRDV   | Negative |
| P80513 | RALRQGDCEVCISYLGRFYQ   | Negative |
| P80513 | VCISYLGRFYQDLKDRDVTF   | Negative |
| P80513 | GLAVALALSVLPASRALRQG   | Negative |
| P80513 | VLPASRALRQGDCEVCISYL   | Negative |
| P80513 | PASRALRQGDCEVCISYLGR   | Negative |
| P80513 | ALALSVLPASRALRQGDCEV   | Negative |
| P80513 | HGLAVALALSVLPASRALRQ   | Negative |
| P80513 | ALSVLPASRALRQGDCEVCI   | Negative |
| P80513 | LRQGDCEVCISYLGRFYQDL   | Negative |
| P80513 | MWATHGLAVALALSVLPASR   | Negative |
| P80513 | RQGDCEVCISYLGRFYQDLK   | Negative |
| P80513 | WATHGLAVALALSVLPASRA   | Negative |
| P80513 | EVCISYLGRFYQDLKDRDVT   | Negative |
| P80513 | LPASRALRQGDCEVCISYLG   | Negative |
| P80513 | AVALALSVLPASRALRQGDC   | Negative |
| P80513 | ALRQGDCEVCISYLGRFYQD   | Negative |
| P80513 | ASRALRQGDCEVCISYLGRF   | Negative |
| P80513 | QGDCEVCISYLGRFYQDLKD   | Negative |
| P80513 | DCEVCISYLGRFYQDLKDRD   | Negative |
| P80513 | SVLPASRALRQGDCEVCISY   | Negative |
| P80513 | SRALRQGDCEVCISYLGRFY   | Negative |
| P80513 | GDCEVCISYLGRFYQDLKDR   | Negative |
| P80513 | LALSVLPASRALRQGDCEVC   | Negative |
| P80513 | LSVLPASRALRQGDCEVCIS   | Negative |
| P80561 | AVALAAVLAAGAPAAQAAGA   | Negative |
| P80561 | APAAQAAGAAAPTAAAAAAP   | Negative |
| P80561 | AAQAAGAAAPTAAAAAAPDI   | Negative |
| P80561 | MRPNRFSLRRSPTAVAAVAL   | Negative |

|        |                      |          |
|--------|----------------------|----------|
| P80561 | SLRRSPTAVAAVALAAVLAA | Negative |
| P80561 | NRFSLRRSPTAVAAVALAAV | Negative |
| P80561 | SPTAVAAVALAAVLAAGAPA | Negative |
| P80561 | VALAAVLAAGAPAAQAAGAA | Negative |
| P80561 | RSPTAVAAVALAAVLAAGAP | Negative |
| P80561 | GAPAAQAAGAAAPTAAAAAA | Negative |
| P80561 | PNRFSLRRSPTAVAAVALAA | Negative |
| P80561 | RFSLRRSPTAVAAVALAAVL | Negative |
| P80561 | AGAPAAQAAGAAAPTAAAAA | Negative |
| P80561 | RRSPTAVAAVALAAVLAAGA | Negative |
| P80561 | PAAQAAGAAAPTAAAAAAPD | Negative |
| P80561 | TAVAAVALAAVLAAGAPAAQ | Negative |
| P80561 | FSLRRSPTAVAAVALAAVLA | Negative |
| P80561 | LAAVLAAGAPAAQAAGAAAP | Negative |
| P80561 | VLAAGAPAAQAAGAAAPTAA | Negative |
| P80561 | LAAGAPAAQAAGAAAPTAAA | Negative |
| P80561 | AAVLAAGAPAAQAAGAAAPT | Negative |
| P80561 | PTAVAAVALAAVLAAGAPAA | Negative |
| P80561 | AVLAAGAPAAQAAGAAAPTA | Negative |
| P80561 | AAGAPAAQAAGAAAPTAAAA | Negative |
| P80561 | LRRSPTAVAAVALAAVLAAG | Negative |
| P80561 | VAAVALAAVLAAGAPAAQAA | Negative |
| P80561 | RPNRFSLRRSPTAVAAVALA | Negative |
| P80561 | ALAAVLAAGAPAAQAAGAAA | Negative |
| P80561 | AAVALAAVLAAGAPAAQAAG | Negative |
| P80561 | AVAAVALAAVLAAGAPAAQA | Negative |
| P80603 | SALAVVAGSASAAAFQLAEV | Negative |
| P80603 | ASAAAFQLAEVSTSGLGRAY | Negative |
| P80603 | AAAFQLAEVSTSGLGRAYAG | Negative |
| P80603 | AGSASAAAFQLAEVSTSGLG | Negative |
| P80603 | AVVAGSASAAAFQLAEVSTS | Negative |
| P80603 | SKFTQTLLASALAVVAGSAS | Negative |
| P80603 | ASALAVVAGSASAAAFQLAE | Negative |
| P80603 | KTSKFTQTLLASALAVVAGS | Negative |
| P80603 | TSKFTQTLLASALAVVAGSA | Negative |
| P80603 | TQTLLASALAVVAGSASAAA | Negative |
| P80603 | AAFQLAEVSTSGLGRAYAGE | Negative |
| P80603 | MAKTSKFTQTLLASALAVVA | Negative |
| P80603 | LASALAVVAGSASAAAFQLA | Negative |
| P80603 | FQLAEVSTSGLGRAYAGEAA | Negative |
| P80603 | KFTQTLLASALAVVAGSASA | Negative |
| P80603 | GSASAAAFQLAEVSTSGLGR | Negative |
| P80603 | AKTSKFTQTLLASALAVVAG | Negative |
| P80603 | FTQTLLASALAVVAGSASAA | Negative |
| P80603 | LAEVSTSGLGRAYAGEAIA  | Negative |
| P80603 | ALAVVAGSASAAAFQLAEVS | Negative |

|        |                       |          |
|--------|-----------------------|----------|
| P80603 | AFQLAEVSTSGLGGRAYAGEA | Negative |
| P80603 | VAGSASAAAFQLAEVSTSGL  | Negative |
| P80603 | SAAAFQLAEVSTSGLGGRAYA | Negative |
| P80603 | VVAGSASAAAFQLAEVSTSG  | Negative |
| P80603 | TLLASALAVVAGSASAAAFQ  | Negative |
| P80603 | LAVVAGSASAAAFQLAEVST  | Negative |
| P80603 | SASAAAFQLAEVSTSGLGRA  | Negative |
| P80603 | QTLLASALAVVAGSASAAAF  | Negative |
| P80603 | QLAEVSTSGLGGRAYAGEAAI | Negative |
| P80604 | MALPISSFSIGNNNLIGVGV  | Negative |
| P80604 | IGVGVSAGNSIYQVKKKTAV  | Negative |
| P80604 | NNLIGVGVSAGNSIYQVKKK  | Negative |
| P80604 | NLIGVGVSAGNSIYQVKKKT  | Negative |
| P80604 | GVGVSAAGNSIYQVKKKTAVE | Negative |
| P80604 | MKNKSKLLACCLMALPISSF  | Negative |
| P80604 | NKSKLLACCLMALPISSFSI  | Negative |
| P80604 | LMALPISSFSIGNNNLIGVG  | Negative |
| P80604 | KNKSKLLACCLMALPISSFS  | Negative |
| P80604 | CLMALPISSFSIGNNNLIGV  | Negative |
| P80604 | SIGNNNLIGVGVSAGNSIYQ  | Negative |
| P80604 | ALPISSFSIGNNNLIGVGVS  | Negative |
| P80604 | SKLLACCLMALPISSFSIGN  | Negative |
| P80604 | LPISSFSIGNNNLIGVGVS   | Negative |
| P80604 | KLLACCLMALPISSFSIGNN  | Negative |
| P80604 | CCLMALPISSFSIGNNNLIG  | Negative |
| P80604 | PISSFSIGNNNLIGVGVSAG  | Negative |
| P80604 | SSFSIGNNNLIGVGVSAGNS  | Negative |
| P80604 | SFSIGNNNLIGVGVSAGNSI  | Negative |
| P80604 | IGNNNLIGVGVSAGNSIYQV  | Negative |
| P80604 | ISSFSIGNNNLIGVGVSAGN  | Negative |
| P80604 | LACCLMALPISSFSIGNNNL  | Negative |
| P80604 | LIGVGVSAGNSIYQVKKKTA  | Negative |
| P80604 | KSKLLACCLMALPISSFSIG  | Negative |
| P80604 | NNNLIGVGVSAGNSIYQVKK  | Negative |
| P80604 | VGVSAGNSIYQVKKKTAVEP  | Negative |
| P80604 | ACCLMALPISSFSIGNNNLI  | Negative |
| P80604 | FSIGNNNLIGVGVSAGNSIY  | Negative |
| P80604 | GNNNLIGVGVSAGNSIYQVK  | Negative |
| P80672 | AANATPLEEAIKDVDVSGVL  | Negative |
| P80672 | EEAIKDVDVSGVLRVRYDTG  | Negative |
| P80672 | AALAAGAFSAANATPLEEAI  | Negative |
| P80672 | MKLVKLSLVAALAAGAFSAA  | Negative |
| P80672 | LSLVAALAAGAFSAANATPL  | Negative |
| P80672 | AFSAANATPLEEAIKDVDVS  | Negative |
| P80672 | PLEEAIKDVDVSGVLRVRYD  | Negative |
| P80672 | AAGAFSAANATPLEEAIKDV  | Negative |



|        |                        |          |
|--------|------------------------|----------|
| P80672 | LEEAIKDVDVSGVLR YRYDT  | Negative |
| P80672 | AGAFSAANATPLEEAIKDVD   | Negative |
| P80672 | IKDVDVSGVLR YRYDTGNFD  | Negative |
| P80672 | ATPLEEAIKDVDVSGVLR YR  | Negative |
| P80672 | TPLEEAIKDVDVSGVLR YR Y | Negative |
| P80672 | KDVDVSGVLR YRYDTGNFDK  | Negative |
| P80672 | SLVAALAAGAFSAANATPLE   | Negative |
| P80672 | GAFSAANATPLEEAIKDVDV   | Negative |
| P80672 | KLVKLSLVAALAAGAFSAAN   | Negative |
| P80672 | ANATPLEEAIKDVDVSGVLR   | Negative |
| P80672 | VKLSLVAALAAGAFSAANAT   | Negative |
| P80672 | AIKDVDVSGVLR YRYDTGNF  | Negative |
| P80672 | ALAAGAFSAANATPLEEAIK   | Negative |
| P80672 | SAANATPLEEAIKDVDVSGV   | Negative |
| P80672 | LVKLSLVAALAAGAFSAANA   | Negative |
| P80672 | VAALAAGAFSAANATPLEEA   | Negative |
| P80672 | LAAGAFSAANATPLEEAIKD   | Negative |
| P80672 | FSAANATPLEEAIKDVDVSG   | Negative |
| P80672 | NATPLEEAIKDVDVSGVLR Y  | Negative |
| P80672 | EAIKDVDVSGVLR YRYDTGN  | Negative |
| P80672 | KLSLVAALAAGAFSAANATP   | Negative |
| P80686 | LIGAPAVAAYS AAPAVSSAY  | Negative |
| P80686 | ANAGLIGAPAVAAYS AAPAV  | Negative |
| P80686 | PAVAAYS AAPAVSSAYIHQA  | Negative |
| P80686 | KFVVFAAALAYANAGLIGAP   | Negative |
| P80686 | GAPAVAAYS AAPAVSSAYIH  | Negative |
| P80686 | AAALAYANAGLIGAPAVAAY   | Negative |
| P80686 | GLIGAPAVAAYS AAPAVSSA  | Negative |
| P80686 | AALAYANAGLIGAPAVAAYS   | Negative |
| P80686 | MYKFVVFAAALAYANAGLIG   | Negative |
| P80686 | AYS AAPAVSSAYIHQAAPVA  | Negative |
| P80686 | AAYS AAPAVSSAYIHQAAPV  | Negative |
| P80686 | YANAGLIGAPAVAAYS AAPA  | Negative |
| P80686 | VAYS AAPAVSSAYIHQAAP   | Negative |
| P80686 | AVAYS AAPAVSSAYIHQA    | Negative |
| P80686 | AAPAVSSAYIHQAAPVAVAH   | Negative |
| P80686 | AYANAGLIGAPAVAAYS AAP  | Negative |
| P80686 | ALAYANAGLIGAPAVAAYS A  | Negative |
| P80686 | LAYANAGLIGAPAVAAYS AA  | Negative |
| P80686 | VFAAALAYANAGLIGAPAVA   | Negative |
| P80686 | FAAALAYANAGLIGAPAVAA   | Negative |
| P80686 | YSAAPAVSSAYIHQAAPVAV   | Negative |
| P80686 | FVVFAAALAYANAGLIGAPA   | Negative |
| P80686 | APAVSSAYIHQAAPVAVAHA   | Negative |
| P80686 | AGLIGAPAVAAYS AAPAVSS  | Negative |
| P80686 | VVFAAALAYANAGLIGAPAV   | Negative |

|        |                      |          |
|--------|----------------------|----------|
| P80686 | SAAPAVSSAYIHQAAPVAVA | Negative |
| P80686 | APAVAAYSAPAVSSAYIHQ  | Negative |
| P80686 | IGAPAVAAYSAPAVSSAYI  | Negative |
| P80686 | NAGLIGAPAVAAYSAPAVS  | Negative |
| P80915 | NGSAFTVWSGPGCNNRAERY | Negative |
| P80915 | LFFSVITVMMLIAMASEMVN | Negative |
| P80915 | FFSVITVMMLIAMASEMVNG | Negative |
| P80915 | ASEMVNGSAFTVWSGPGCNN | Negative |
| P80915 | VITVMMLIAMASEMVNGSAF | Negative |
| P80915 | SEMVNGSAFTVWSGPGCNNR | Negative |
| P80915 | MMLIAMASEMVNGSAFTVWS | Negative |
| P80915 | AFTVWSGPGCNNRAERYSKC | Negative |
| P80915 | VNGSAFTVWSGPGCNNRAER | Negative |
| P80915 | VMMLIAMASEMVNGSAFTVW | Negative |
| P80915 | ASTKLFFSVITVMMLIAMAS | Negative |
| P80915 | MLIAMASEMVNGSAFTVWSG | Negative |
| P80915 | LIAMASEMVNGSAFTVWSGP | Negative |
| P80915 | MASTKLFFSVITVMMLIAMA | Negative |
| P80915 | STKLFFSVITVMMLIAMASE | Negative |
| P80915 | IAMASEMVNGSAFTVWSGPG | Negative |
| P80915 | KLFFSVITVMMLIAMASEMV | Negative |
| P80915 | ITVMMLIAMASEMVNGSAFT | Negative |
| P80915 | GSAFTVWSGPGCNNRAERYS | Negative |
| P80915 | MVNGSAFTVWSGPGCNNRAE | Negative |
| P80915 | FTVWSGPGCNNRAERYSKCG | Negative |
| P80915 | TKLFFSVITVMMLIAMASEM | Negative |
| P80915 | EMVNGSAFTVWSGPGCNNRA | Negative |
| P80915 | SAFTVWSGPGCNNRAERYSK | Negative |
| P80915 | TVWSGPGCNNRAERYSKCGC | Negative |
| P80915 | FSVITVMMLIAMASEMVNGS | Negative |
| P80915 | AMASEMVNGSAFTVWSGPGC | Negative |
| P80915 | SVITVMMLIAMASEMVNGSA | Negative |
| P80915 | MASEMVNGSAFTVWSGPGCN | Negative |
| P80961 | GSFAQGAADLESLGQYFEEM | Negative |
| P80961 | LGQYFEEMKTKLIQDMTEII | Negative |
| P80961 | ALAQGSFAQGAADLESLGQY | Negative |
| P80961 | QGSFAQGAADLESLGQYFEE | Negative |
| P80961 | AQGAADLESLGQYFEEMKTK | Negative |
| P80961 | LALAQGSFAQGAADLESLGQ | Negative |
| P80961 | ATIVLLALAQGSFAQGAADL | Negative |
| P80961 | SFAQGAADLESLGQYFEEMK | Negative |
| P80961 | LESLGQYFEEMKTKLIQDMT | Negative |
| P80961 | DLESLGQYFEEMKTKLIQDM | Negative |
| P80961 | GAADLESLGQYFEEMKTKLI | Negative |
| P80961 | ADLESLGQYFEEMKTKLIQD | Negative |
| P80961 | LAQGSFAQGAADLESLGQYF | Negative |

|        |                      |          |
|--------|----------------------|----------|
| P80961 | FSLVATIVLLALAQGSFAQG | Negative |
| P80961 | AQGSFAQGAADLESLGQYFE | Negative |
| P80961 | LLALAQGSFAQGAADLESLG | Negative |
| P80961 | ESLGQYFEEMKTKLIQDMTE | Negative |
| P80961 | TIVLLALAQGSFAQGAADLE | Negative |
| P80961 | MKFSLVATIVLLALAQGSFA | Negative |
| P80961 | VLLALAQGSFAQGAADLESL | Negative |
| P80961 | QGAADLESLGQYFEEMKTKL | Negative |
| P80961 | KFSLVATIVLLALAQGSFAQ | Negative |
| P80961 | FAQGAADLESLGQYFEEMKT | Negative |
| P80961 | AADLESLGQYFEEMKTKLIQ | Negative |
| P80961 | GQYFEEMKTKLIQDMTEIIR | Negative |
| P80961 | SLVATIVLLALAQGSFAQGA | Negative |
| P80961 | IVLLALAQGSFAQGAADLES | Negative |
| P80961 | SLGQYFEEMKTKLIQDMTEI | Negative |
| P80961 | LVATIVLLALAQGSFAQGAA | Negative |
| P80963 | MILLETGKNAATSYIAYGCN | Negative |
| P80963 | GSMYELGKMILLETGKNAAT | Negative |
| P80963 | VLLVGVEGSMYELGKMILLE | Negative |
| P80963 | YELGKMILLETGKNAATSYI | Negative |
| P80963 | IVAVLLVGVEGSMYELGKMI | Negative |
| P80963 | ETGKNAATSYIAYGCNCGVG | Negative |
| P80963 | TGKNAATSYIAYGCNCGVGR | Negative |
| P80963 | VGVEGSMYELGKMILLETGK | Negative |
| P80963 | LLVGVEGSMYELGKMILLET | Negative |
| P80963 | ELGKMILLETGKNAATSYIA | Negative |
| P80963 | LLETGKNAATSYIAYGCNCG | Negative |
| P80963 | LWIVAVLLVGVEGSMYELGK | Negative |
| P80963 | GVEGSMYELGKMILLETGKN | Negative |
| P80963 | MYELGKMILLETGKNAATSY | Negative |
| P80963 | GKMILLETGKNAATSYIAYG | Negative |
| P80963 | AVLLVGVEGSMYELGKMILL | Negative |
| P80963 | LGKMILLETGKNAATSYIAY | Negative |
| P80963 | ILLETGKNAATSYIAYGCNC | Negative |
| P80963 | VEGSMYELGKMILLETGKNA | Negative |
| P80963 | VAVLLVGVEGSMYELGKMIL | Negative |
| P80963 | KMILLETGKNAATSYIAYGC | Negative |
| P80963 | SMYELGKMILLETGKNAATS | Negative |
| P80963 | LETGKNAATSYIAYGCNCGV | Negative |
| P80963 | TLWIVAVLLVGVEGSMYELG | Negative |
| P80963 | MRTLWIVAVLLVGVEGSMYE | Negative |
| P80963 | WIVAVLLVGVEGSMYELGKM | Negative |
| P80963 | LVGVEGSMYELGKMILLETG | Negative |
| P80963 | EGSMYELGKMILLETGKNAA | Negative |
| P80963 | GKNAATSYIAYGCNCGVGRR | Negative |
| P80964 | GIFLLWAGVSVFLPLDPVNG | Negative |

|        |                      |          |
|--------|----------------------|----------|
| P80964 | QHLPGRFLTPAITSDDKCVF | Negative |
| P80964 | DQHLPGRFLTPAITSDDKCV | Negative |
| P80964 | LGIFLLWAGVSVFLPLDPVN | Negative |
| P80964 | LPLDPVNGDQHLPGRFLTPA | Negative |
| P80964 | RLGIFLLWAGVSVFLPLDPV | Negative |
| P80964 | VNGDQHLPGRFLTPAITSDD | Negative |
| P80964 | PRLGIFLLWAGVSVFLPLDP | Negative |
| P80964 | GVSFVLPLDPVNGDQHLPGR | Negative |
| P80964 | PVNGDQHLPGRFLTPAITS  | Negative |
| P80964 | FLPLDPVNGDQHLPGRFLTP | Negative |
| P80964 | VSVFLPLDPVNGDQHLPGRF | Negative |
| P80964 | LWAGVSVFLPLDPVNGDQHL | Negative |
| P80964 | PGRFLTPAITSDDKCVFPI  | Negative |
| P80964 | PLDPVNGDQHLPGRFLTPAI | Negative |
| P80964 | GDQHLPGRFLTPAITSDDKC | Negative |
| P80964 | FLLWAGVSVFLPLDPVNGDQ | Negative |
| P80964 | SVFLPLDPVNGDQHLPGRFL | Negative |
| P80964 | AGVSVFLPLDPVNGDQHLP  | Negative |
| P80964 | LDPVNGDQHLPGRFLTPAIT | Negative |
| P80964 | MAPRLGIFLLWAGVSVFLPL | Negative |
| P80964 | APRLGIFLLWAGVSVFLPLD | Negative |
| P80964 | LPGRFLTPAITSDDKCVFPF | Negative |
| P80964 | DPVNGDQHLPGRFLTPAITS | Negative |
| P80964 | IFLLWAGVSVFLPLDPVNGD | Negative |
| P80964 | VFLPLDPVNGDQHLPGRFLT | Negative |
| P80964 | HLPGRFLTPAITSDDKCVFP | Negative |
| P80964 | LLWAGVSVFLPLDPVNGDQH | Negative |
| P80964 | NGDQHLPGRFLTPAITSDDK | Negative |
| P81019 | HPVNGGDIPDPGSKPTPPGM | Negative |
| P81019 | GASVFQQLHPVNGGDIPDPG | Negative |
| P81019 | VFQQLHPVNGGDIPDPGSKP | Negative |
| P81019 | PVNGGDIPDPGSKPTPPGMA | Negative |
| P81019 | AGASVFQQLHPVNGGDIPDP | Negative |
| P81019 | FLIWAGASVFQQLHPVNGGD | Negative |
| P81019 | VNGGDIPDPGSKPTPPGMAD | Negative |
| P81019 | QLHPVNGGDIPDPGSKPTPP | Negative |
| P81019 | IPDPGSKPTPPGMADELPT  | Negative |
| P81019 | LIWAGASVFQQLHPVNGGDI | Negative |
| P81019 | APLVGLFIWAGASVFQQLH  | Negative |
| P81019 | IWAGASVFQQLHPVNGGDIP | Negative |
| P81019 | GLFIWAGASVFQQLHPVNG  | Negative |
| P81019 | GGDIPDPGSKPTPPGMADEL | Negative |
| P81019 | MAPLVGLFIWAGASVFQQL  | Negative |
| P81019 | GDIPDPGSKPTPPGMADELP | Negative |
| P81019 | NGGDIPDPGSKPTPPGMADE | Negative |
| P81019 | DIPDPGSKPTPPGMADELPT | Negative |

|        |                      |          |
|--------|----------------------|----------|
| P81019 | LFLIWAGASVFQQLHPVNGG | Negative |
| P81019 | LVGLFLIWAGASVFQQLHPV | Negative |
| P81019 | VGLFLIWAGASVFQQLHPVN | Negative |
| P81019 | QQLHPVNGGDIPDPGSKPTP | Negative |
| P81019 | PLVGLFLIWAGASVFQQLHP | Negative |
| P81019 | LHPVNGGDIPDPGSKPTPPG | Negative |
| P81019 | FQQLHPVNGGDIPDPGSKPT | Negative |
| P81019 | PDPGSKPTPPGMADELPTET | Negative |
| P81019 | SVFQQLHPVNGGDIPDPGSK | Negative |
| P81019 | ASVFQQLHPVNGGDIPDPGS | Negative |
| P81019 | DPGSKPTPPGMADELPTETY | Negative |
| P81025 | VLMMVSWPGSQAVGGPQHLC | Negative |
| P81025 | HLCGSHLVDALYLVCGDRGF | Negative |
| P81025 | WPGSQAVGGPQHLCGSHLVD | Negative |
| P81025 | LWLQAFSLLVLMMVSWPGSQ | Negative |
| P81025 | PQHLCGSHLVDALYLVCGDR | Negative |
| P81025 | MAALWLQAFSLLVLMMVSWP | Negative |
| P81025 | WLQAFSLLVLMMVSWPGSQA | Negative |
| P81025 | SWPGSQAVGGPQHLCGSHLV | Negative |
| P81025 | MMVSWPGSQAVGGPQHLCGS | Negative |
| P81025 | QAVGGPQHLCGSHLVDALYL | Negative |
| P81025 | LQAFSLLVLMMVSWPGSQAV | Negative |
| P81025 | VGGPQHLCGSHLVDALYLV  | Negative |
| P81025 | GGPQHLCGSHLVDALYLVCG | Negative |
| P81025 | AFSLLVLMMVSWPGSQAVGG | Negative |
| P81025 | GSQAVGGPQHLCGSHLVDAL | Negative |
| P81025 | LMMVSWPGSQAVGGPQHLCG | Negative |
| P81025 | VSWPGSQAVGGPQHLCGSHL | Negative |
| P81025 | LLVLMMVSWPGSQAVGGPQH | Negative |
| P81025 | MVSWPGSQAVGGPQHLCGSH | Negative |
| P81025 | FSLLVLMMVSWPGSQAVGGP | Negative |
| P81025 | SQAVGGPQHLCGSHLVDALY | Negative |
| P81025 | AVGGPQHLCGSHLVDALYLV | Negative |
| P81025 | GPQHLCGSHLVDALYLVCGD | Negative |
| P81025 | QAFSLLVLMMVSWPGSQAVG | Negative |
| P81025 | ALWLQAFSLLVLMMVSWPGS | Negative |
| P81025 | AALWLQAFSLLVLMMVSWPG | Negative |
| P81025 | LVLMMVSWPGSQAVGGPQHL | Negative |
| P81025 | QHLCGSHLVDALYLVCGDRG | Negative |
| P81025 | PGSQAVGGPQHLCGSHLVDA | Negative |
| P81054 | PEAVDGVNNLKVVTTITNTG | Negative |
| P81054 | LAVAVSANPGLSLKVSYPEA | Negative |
| P81054 | MFSSVMVALVSLAVAVSANP | Negative |
| P81054 | PGLSLKVSYPEAVDGVNNLK | Negative |
| P81054 | VSANPGLSLKVSYPEAVDGV | Negative |
| P81054 | VSGPEAVDGVNNLKVVTTIT | Negative |

|        |                       |          |
|--------|-----------------------|----------|
| P81054 | SSVMVALVSLAVAVSANPGL  | Negative |
| P81054 | NPGLSLKVS GPEAVDGVNNL | Negative |
| P81054 | VAVSANPGLSLKVS GPEAVD | Negative |
| P81054 | GPEAVDGVNNLKVVTITNT   | Negative |
| P81054 | KVS GPEAVDGVNNLKVVTI  | Negative |
| P81054 | VALVSLAVAVSANPGLSLKV  | Negative |
| P81054 | VMVALVSLAVAVSANPGLSL  | Negative |
| P81054 | SGPEAVDGVNNLKVVTITN   | Negative |
| P81054 | AVSANPGLSLKVS GPEAVDG | Negative |
| P81054 | LSLKVS GPEAVDGVNNLKV  | Negative |
| P81054 | VSLAVAVSANPGLSLKVS GP | Negative |
| P81054 | LKVS GPEAVDGVNNLKVVT  | Negative |
| P81054 | GLSLKVS GPEAVDGVNNLKV | Negative |
| P81054 | SANPGLSLKVS GPEAVDGVN | Negative |
| P81054 | EAVDGVNNLKVVTITNTGD   | Negative |
| P81054 | AVAVSANPGLSLKVS GPEAV | Negative |
| P81054 | SLKVS GPEAVDGVNNLKVVT | Negative |
| P81054 | MVALVSLAVAVSANPGLSLK  | Negative |
| P81054 | SLAVAVSANPGLSLKVS GPE | Negative |
| P81054 | LVSLAVAVSANPGLSLKVS G | Negative |
| P81054 | ANPGLSLKVS GPEAVDGVNN | Negative |
| P81054 | FSSVMVALVSLAVAVSANPG  | Negative |
| P81054 | ALVSLAVAVSANPGLSLKVS  | Negative |
| P81058 | RLVVCLVFLASFALVCQGQV  | Negative |
| P81058 | IPRPPPFVRPLPGGPIGPYN  | Negative |
| P81058 | LASFALVCQGQVYKGGYTRP  | Negative |
| P81058 | VCQGQVYKGGYTRPIRPPP   | Negative |
| P81058 | LVCQGQVYKGGYTRPIRPPP  | Negative |
| P81058 | SFALVCQGQVYKGGYTRPIP  | Negative |
| P81058 | FLASFALVCQGQVYKGGYTR  | Negative |
| P81058 | YTRPIRPPPFVRPLPGGPI   | Negative |
| P81058 | VVCLVFLASFALVCQGQVYK  | Negative |
| P81058 | YKGGYTRPIRPPPFVRPLP   | Negative |
| P81058 | RPIRPPPFVRPLPGGPIGP   | Negative |
| P81058 | TRPIRPPPFVRPLPGGPIG   | Negative |
| P81058 | PIRPPPFVRPLPGGPIGPY   | Negative |
| P81058 | VFLASFALVCQGQVYKGGYT  | Negative |
| P81058 | GQVYKGGYTRPIRPPPFVR   | Negative |
| P81058 | CQGQVYKGGYTRPIRPPPF   | Negative |
| P81058 | ASFALVCQGQVYKGGYTRPI  | Negative |
| P81058 | CLVFLASFALVCQGQVYKGG  | Negative |
| P81058 | QGQVYKGGYTRPIRPPPFV   | Negative |
| P81058 | MRLVVCLVFLASFALVCQGQ  | Negative |
| P81058 | LVVCLVFLASFALVCQGQVY  | Negative |
| P81058 | GGYTRPIRPPPFVRPLPGG   | Negative |
| P81058 | FALVCQGQVYKGGYTRPIR   | Negative |

|        |                       |          |
|--------|-----------------------|----------|
| P81058 | GYTRPIRPPPFVRPLPGGP   | Negative |
| P81058 | QVYKGGYTRPIRPPPFVRP   | Negative |
| P81058 | KGGYTRPIRPPPFVRPLPG   | Negative |
| P81058 | LVFLASFALVCQGQVYKGGY  | Negative |
| P81058 | ALVCQGQVYKGGYTRPIRP   | Negative |
| P81058 | VYKGGYTRPIRPPPFVRPL   | Negative |
| P81186 | AASGAGFGSLALAADNRPEK  | Negative |
| P81186 | MSTRRDFLKYFAMSAAVAA   | Negative |
| P81186 | ALAADNRPEKWVKGVCRYCG  | Negative |
| P81186 | GFGSLALAADNRPEKWVKGV  | Negative |
| P81186 | RDFLKYFAMSAAVAAASGAG  | Negative |
| P81186 | AGFGSLALAADNRPEKWVKG  | Negative |
| P81186 | LALAADNRPEKWVKGVCRYC  | Negative |
| P81186 | SGAGFGSLALAADNRPEKWV  | Negative |
| P81186 | RRDFLKYFAMSAAVAAASGA  | Negative |
| P81186 | LKYFAMSAAVAAASGAGFGS  | Negative |
| P81186 | KYFAMSAAVAAASGAGFGSL  | Negative |
| P81186 | STRRDFLKYFAMSAAVAAA   | Negative |
| P81186 | SRRDFLKYFAMSAAVAAASG  | Negative |
| P81186 | MSAAVAAASGAGFGSLALAA  | Negative |
| P81186 | FAMSAAVAAASGAGFGSLAL  | Negative |
| P81186 | GAGFGSLALAADNRPEKWVK  | Negative |
| P81186 | SAAVAAASGAGFGSLALAAD  | Negative |
| P81186 | ASGAGFGSLALAADNRPEKW  | Negative |
| P81186 | AMSAAVAAASGAGFGSLALA  | Negative |
| P81186 | AAASGAGFGSLALAADNRPE  | Negative |
| P81186 | AVAAASGAGFGSLALAADNR  | Negative |
| P81186 | SLALAADNRPEKWVKGVCRY  | Negative |
| P81186 | TSRRDFLKYFAMSAAVAAAS  | Negative |
| P81186 | FLKYFAMSAAVAAASGAGFG  | Negative |
| P81186 | DFLKYFAMSAAVAAASGAGF  | Negative |
| P81186 | GSLALAADNRPEKWVKGVCR  | Negative |
| P81186 | AAVAAASGAGFGSLALAADN  | Negative |
| P81186 | FGSLALAADNRPEKWVKGVC  | Negative |
| P81186 | YFAMSAAVAAASGAGFGSLA  | Negative |
| P81238 | QLIAGYEEAAAGAPADAERGR | Negative |
| P81238 | MTRFLILSAVLAGPALAGDT  | Negative |
| P81238 | GYEAAAGAPADAERGRALFL  | Negative |
| P81238 | LILSAVLAGPALAGDTSPAQ  | Negative |
| P81238 | ILSAVLAGPALAGDTSPAQL  | Negative |
| P81238 | LSAVLAGPALAGDTSPAQLI  | Negative |
| P81238 | AGYEEAAAGAPADAERGRALF | Negative |
| P81238 | YEEAAAGAPADAERGRALFLS | Negative |
| P81238 | LIAGYEEAAAGAPADAERGRA | Negative |
| P81238 | GPALAGDTSPAQLIAGYEEA  | Negative |
| P81238 | ALAGDTSPAQLIAGYEEAAAG | Negative |

|        |                      |          |
|--------|----------------------|----------|
| P81238 | LAGPALAGDTSPAQLIAGYE | Negative |
| P81238 | SAVLAGPALAGDTSPAQLIA | Negative |
| P81238 | LAGDTSPAQLIAGYEAAAGA | Negative |
| P81238 | AQLIAGYEAAAGAPADAERG | Negative |
| P81238 | DTSPAQLIAGYEAAAGAPAD | Negative |
| P81238 | AVLAGPALAGDTSPAQLIAG | Negative |
| P81238 | PALAGDTSPAQLIAGYEAAA | Negative |
| P81238 | SPAQLIAGYEAAAGAPADAE | Negative |
| P81238 | FLILSAVLAGPALAGDTSPA | Negative |
| P81238 | TSPAQLIAGYEAAAGAPADA | Negative |
| P81238 | VLAGPALAGDTSPAQLIAGY | Negative |
| P81238 | EAAAGAPADAERGRALFLST | Negative |
| P81238 | GDTSPAQLIAGYEAAAGAPA | Negative |
| P81238 | AGPALAGDTSPAQLIAGYEA | Negative |
| P81238 | PAQLIAGYEAAAGAPADAER | Negative |
| P81238 | AGDTSPAQLIAGYEAAAGAP | Negative |
| P81238 | TRFLILSAVLAGPALAGDTS | Negative |
| P81238 | IAGYEAAAGAPADAERGRAL | Negative |
| P81264 | GLALQGAASRAHQHSMEIRT | Negative |
| P81264 | LQGAASRAHQHSMEIRTPDI | Negative |
| P81264 | GAASRAHQHSMEIRTPDINP | Negative |
| P81264 | VGAWLLCLLLLGLALQGAAS | Negative |
| P81264 | LGLALQGAASRAHQHSMEIR | Negative |
| P81264 | LCLLLLGLALQGAASRAHQH | Negative |
| P81264 | QGAASRAHQHSMEIRTPDIN | Negative |
| P81264 | ALQGAASRAHQHSMEIRTPD | Negative |
| P81264 | AHQHSMEIRTPDINPAWYAG | Negative |
| P81264 | LLLLGLALQGAASRAHQHSM | Negative |
| P81264 | QHSMEIRTPDINPAWYAGRG | Negative |
| P81264 | HQHSMEIRTPDINPAWYAGR | Negative |
| P81264 | LALQGAASRAHQHSMEIRTP | Negative |
| P81264 | SMEIRTPDINPAWYAGRGIR | Negative |
| P81264 | CLLLLGLALQGAASRAHQHS | Negative |
| P81264 | KAVGAWLLCLLLLGLALQGA | Negative |
| P81264 | RAHQHSMEIRTPDINPAWYA | Negative |
| P81264 | SRAHQHSMEIRTPDINPAWY | Negative |
| P81264 | GAWLLCLLLLGLALQGAASR | Negative |
| P81264 | LLGLALQGAASRAHQHSME  | Negative |
| P81264 | AASRAHQHSMEIRTPDINPA | Negative |
| P81264 | MEIRTPDINPAWYAGRGIRP | Negative |
| P81264 | AWLLCLLLLGLALQGAASRA | Negative |
| P81264 | LLGLALQGAASRAHQHSMEI | Negative |
| P81264 | WLLCLLLLGLALQGAASRAH | Negative |
| P81264 | AVGAWLLCLLLLGLALQGAA | Negative |
| P81264 | HSMEIRTPDINPAWYAGRGI | Negative |
| P81264 | MKAVGAWLLCLLLLGLALQG | Negative |



|        |                        |          |
|--------|------------------------|----------|
| P81264 | ASRAHQHSMEIRTPDINPAW   | Negative |
| P81294 | CWRGDSNWDQNRMKLADCAV   | Negative |
| P81294 | WRGDSNWDQNRMKLADCAVG   | Negative |
| P81294 | NPIDSCWRGDSNWDQNRMKL   | Negative |
| P81294 | MASPCLI AVL VFLCAIVSCY | Negative |
| P81294 | DSCWRGDSNWDQNRMKLADC   | Negative |
| P81294 | VFLCAIVSCYSDNPIDSCWR   | Negative |
| P81294 | ASPCLI AVL VFLCAIVSCYS | Negative |
| P81294 | LI AVL VFLCAIVSCYSDNPI | Negative |
| P81294 | FLCAIVSCYSDNPIDSCWRG   | Negative |
| P81294 | RGDSNWDQNRMKLADCAVGF   | Negative |
| P81294 | SDNPIDSCWRGDSNWDQNRM   | Negative |
| P81294 | IVSCYSDNPIDSCWRGDSNW   | Negative |
| P81294 | IDSCWRGDSNWDQNRMKLAD   | Negative |
| P81294 | SPCLIA VL VFLCAIVSCYSD | Negative |
| P81294 | VSCYSDNPIDSCWRGDSNWD   | Negative |
| P81294 | CLIA VL VFLCAIVSCYSDNP | Negative |
| P81294 | CAIVSCYSDNPIDSCWRGDS   | Negative |
| P81294 | VL VFLCAIVSCYSDNPIDSC  | Negative |
| P81294 | LVFLCAIVSCYSDNPIDSCW   | Negative |
| P81294 | AVL VFLCAIVSCYSDNPIDS  | Negative |
| P81294 | SCYSDNPIDSCWRGDSNWDQ   | Negative |
| P81294 | CYSDNPIDSCWRGDSNWDQN   | Negative |
| P81294 | PIDSCWRGDSNWDQNRMKLA   | Negative |
| P81294 | PCLIA VL VFLCAIVSCYSDN | Negative |
| P81294 | AIVSCYSDNPIDSCWRGDSN   | Negative |
| P81294 | LCAIVSCYSDNPIDSCWRGD   | Negative |
| P81294 | DNPIDSCWRGDSNWDQNRMK   | Negative |
| P81294 | YSDNPIDSCWRGDSNWDQNR   | Negative |
| P81294 | SCWRGDSNWDQNRMKLADCA   | Negative |
| P81295 | LLAATLAISLHMQEAGVVKF   | Negative |
| P81295 | ELAFLLAATLAISLHMQEAG   | Negative |
| P81295 | EAGVVKFDIKNQCGYTVWAA   | Negative |
| P81295 | SELAFLLAATLAISLHMQEA   | Negative |
| P81295 | AISLHMQEAGVVKFDIKNQC   | Negative |
| P81295 | LAATLAISLHMQEAGVVKFD   | Negative |
| P81295 | FDIKNQCGYTVWAAGLPGGG   | Negative |
| P81295 | SLHMQEAGVVKFDIKNQCGY   | Negative |
| P81295 | VVKFDIKNQCGYTVWAAGLP   | Negative |
| P81295 | VKFDIKNQCGYTVWAAGLPG   | Negative |
| P81295 | KFDIKNQCGYTVWAAGLPGG   | Negative |
| P81295 | RVSELAFLLAATLAISLHMQ   | Negative |
| P81295 | ARVSELAFLLAATLAISLHM   | Negative |
| P81295 | QEAGVVKFDIKNQCGYTVWA   | Negative |
| P81295 | LAISLHMQEAGVVKFDIKNQ   | Negative |
| P81295 | ATLAISLHMQEAGVVKFDIK   | Negative |

|        |                      |          |
|--------|----------------------|----------|
| P81295 | LHMQEAGVVKFDIKNQCGYT | Negative |
| P81295 | GVVKFDIKNQCGYTVWAAGL | Negative |
| P81295 | VSELAFLLAATLAISLHMQE | Negative |
| P81295 | TLAISLHMQEAGVVKFDIKN | Negative |
| P81295 | ISLHMQEAGVVKFDIKNQCG | Negative |
| P81295 | AGVVKFDIKNQCGYTVWAAG | Negative |
| P81295 | MARVSELAFLLAATLAISLH | Negative |
| P81295 | MQEAGVVKFDIKNQCGYTVW | Negative |
| P81295 | HMQEAGVVKFDIKNQCGYTV | Negative |
| P81295 | LAFLLAATLAISLHMQEAGV | Negative |
| P81295 | DIKNQCGYTVWAAGLPGGGK | Negative |
| P81295 | FLLAATLAISLHMQEAGVVK | Negative |
| P81295 | AFLLAATLAISLHMQEAGVV | Negative |
| P81370 | LSALLFIAFLTCARGATFN  | Negative |
| P81370 | GATFNIINNCPFTVWAAAVP | Negative |
| P81370 | IAFLTCARGATFNIINNCP  | Negative |
| P81370 | LFTCARGATFNIINNCPFTV | Negative |
| P81370 | ATFNIINNCPFTVWAAAVPG | Negative |
| P81370 | MSTFKSLSLSALLFIAFLFT | Negative |
| P81370 | RGATFNIINNCPFTVWAAAV | Negative |
| P81370 | ALLFIAFLTCARGATFNII  | Negative |
| P81370 | TCARGATFNIINNCPFTVWA | Negative |
| P81370 | FKSLSLSALLFIAFLTCAR  | Negative |
| P81370 | SLSLSALLFIAFLTCARGA  | Negative |
| P81370 | ARGATFNIINNCPFTVWAAA | Negative |
| P81370 | NIINNCPFTVWAAAVPGGGK | Negative |
| P81370 | INNCPFTVWAAAVPGGGKRL | Negative |
| P81370 | LLFIAFLTCARGATFNIIN  | Negative |
| P81370 | FTCARGATFNIINNCPFTVW | Negative |
| P81370 | FIAFLTCARGATFNIINNC  | Negative |
| P81370 | IINNCPFTVWAAAVPGGGKR | Negative |
| P81370 | TFNIINNCPFTVWAAAVPGG | Negative |
| P81370 | FNIINNCPFTVWAAAVPGGG | Negative |
| P81370 | FLFTCARGATFNIINNCPFT | Negative |
| P81370 | LFIAFLTCARGATFNIINN  | Negative |
| P81370 | CARGATFNIINNCPFTVWAA | Negative |
| P81370 | LSLSALLFIAFLTCARGAT  | Negative |
| P81370 | SLSALLFIAFLTCARGATF  | Negative |
| P81370 | KSLSLSALLFIAFLTCARG  | Negative |
| P81370 | TFKSLSLSALLFIAFLFTCA | Negative |
| P81370 | AFLTCARGATFNIINNCPF  | Negative |
| P81370 | STFKSLSLSALLFIAFLFTC | Negative |
| P81383 | FQEPEYENWLATASHGLTKT | Negative |
| P81383 | ECFQEPEYENWLATASHGLT | Negative |
| P81383 | VPRSENHVINLEECFQEPEY | Negative |
| P81383 | PRSENHVINLEECFQEPEYE | Negative |

|        |                       |          |
|--------|-----------------------|----------|
| P81383 | FLLLLLVFLGVPRSENHVI   | Negative |
| P81383 | VINLEECFQEPEYENWLATA  | Negative |
| P81383 | LFLGVPRSENHVINLEECFQ  | Negative |
| P81383 | ENHVINLEECFQEPEYENWL  | Negative |
| P81383 | EECFQEPEYENWLATASHGL  | Negative |
| P81383 | HVINLEECFQEPEYENWLAT  | Negative |
| P81383 | LVLFLGVPRSENHVINLEEC  | Negative |
| P81383 | QEPEYENWLATASHGLTKTL  | Negative |
| P81383 | LLLLLVFLGVPRSENHVIN   | Negative |
| P81383 | LLVLFLGVPRSENHVINLE   | Negative |
| P81383 | SENHVINLEECFQEPEYENW  | Negative |
| P81383 | LGVPRSENHVINLEECFQEP  | Negative |
| P81383 | RSENHVINLEECFQEPEYEN  | Negative |
| P81383 | NLEECFQEPEYENWLATASH  | Negative |
| P81383 | VLFLGVPRSENHVINLEECF  | Negative |
| P81383 | MNDFLLLLLVLFLGVPRSEN  | Negative |
| P81383 | GVPRSENHVINLEECFQEPE  | Negative |
| P81383 | NHVINLEECFQEPEYENWLA  | Negative |
| P81383 | INLEECFQEPEYENWLATAS  | Negative |
| P81383 | LLVLFLGVPRSENHVINLEE  | Negative |
| P81383 | FLGVPRSENHVINLEECFQE  | Negative |
| P81383 | CFQEPEYENWLATASHGLTK  | Negative |
| P81383 | NDFLLLLLVFLGVPRSENH   | Negative |
| P81383 | DFLLLLLVFLGVPRSENHV   | Negative |
| P81383 | LEECFQEPEYENWLATASHG  | Negative |
| P81417 | FAIVLLAALVLLGQTEAGGL  | Negative |
| P81417 | QTEAGGLKKLGKKLEGVGKR  | Negative |
| P81417 | GGLKKLGKKLEGVGKRVFKA  | Negative |
| P81417 | KLGGKKLEGVGKRVFKASEKA | Negative |
| P81417 | GLKKLGKKLEGVGKRVFKAS  | Negative |
| P81417 | LFAIVLLAALVLLGQTEAGG  | Negative |
| P81417 | LLGQTEAGGLKKLGKKLEGV  | Negative |
| P81417 | KKLGKKLEGVGKRVFKASEK  | Negative |
| P81417 | KLFAIVLLAALVLLGQTEAG  | Negative |
| P81417 | NFTKLFAIVLLAALVLLGQT  | Negative |
| P81417 | VLLAALVLLGQTEAGGLKKL  | Negative |
| P81417 | FTKLFAIVLLAALVLLGQTE  | Negative |
| P81417 | LGQTEAGGLKKLGKKLEGVG  | Negative |
| P81417 | VLLGQTEAGGLKKLGKKLEG  | Negative |
| P81417 | MNFTKLFAIVLLAALVLLGQ  | Negative |
| P81417 | AALVLLGQTEAGGLKKLGKK  | Negative |
| P81417 | LGKKLEGVGKRVFKASEKAL  | Negative |
| P81417 | EAGGLKKLGKKLEGVGKRVF  | Negative |
| P81417 | TKLFAIVLLAALVLLGQTEA  | Negative |
| P81417 | GKKLEGVGKRVFKASEKALP  | Negative |
| P81417 | ALVLLGQTEAGGLKKLGKKL  | Negative |

|        |                      |          |
|--------|----------------------|----------|
| P81417 | TEAGGLKKLGKKLEGVGKRV | Negative |
| P81417 | LAALVLLGQTEAGGLKKLGK | Negative |
| P81417 | GQTEAGGLKKLGKKLEGVGK | Negative |
| P81417 | LKKLGKKLEGVGKRVFKASE | Negative |
| P81417 | LVLLGQTEAGGLKKLGKKLE | Negative |
| P81417 | LLAALVLLGQTEAGGLKKLG | Negative |
| P81417 | AGGLKKLGKKLEGVGKRVFK | Negative |
| P81417 | AIVLLAALVLLGQTEAGGLK | Negative |
| P81418 | MILLLSVISAVMSAGCIKNG | Negative |
| P81418 | VSSAYLKFALVMILLLSVIS | Negative |
| P81418 | KVSSAYLKFALVMILLLSVI | Negative |
| P81418 | CIKNGGRCNASAGPPYCCSS | Negative |
| P81418 | LLSVISAVMSAGCIKNGGRC | Negative |
| P81418 | AVMSAGCIKNGGRCNASAGP | Negative |
| P81418 | FALVMILLLSVISAVMSAGC | Negative |
| P81418 | LSVISAVMSAGCIKNGGRCN | Negative |
| P81418 | LLLSVISAVMSAGCIKNGGR | Negative |
| P81418 | SAYLKFALVMILLLSVISAV | Negative |
| P81418 | ALVMILLLSVISAVMSAGCI | Negative |
| P81418 | GCIKNGGRCNASAGPPYCCS | Negative |
| P81418 | VMILLLSVISAVMSAGCIKN | Negative |
| P81418 | KFALVMILLLSVISAVMSAG | Negative |
| P81418 | VISAVMSAGCIKNGGRCNAS | Negative |
| P81418 | AKVSSAYLKFALVMILLLSV | Negative |
| P81418 | ISAVMSAGCIKNGGRCNASA | Negative |
| P81418 | SAVMSAGCIKNGGRCNASAG | Negative |
| P81418 | VMSAGCIKNGGRCNASAGPP | Negative |
| P81418 | SVISAVMSAGCIKNGGRCNA | Negative |
| P81418 | SAGCIKNGGRCNASAGPPYC | Negative |
| P81418 | MSAGCIKNGGRCNASAGPPY | Negative |
| P81418 | SSAYLKFALVMILLLSVISA | Negative |
| P81418 | AGCIKNGGRCNASAGPPYCC | Negative |
| P81418 | ILLLSVISAVMSAGCIKNGG | Negative |
| P81418 | LKFALVMILLLSVISAVMSA | Negative |
| P81418 | MAKVSSAYLKFALVMILLLS | Negative |
| P81418 | AYLKFALVMILLLSVISAVM | Negative |
| P81418 | YLKFALVMILLLSVISAVMS | Negative |
| P81429 | RVNSGDIAGGYEYTYSGRKI | Negative |
| P81429 | VLFYLTICIFTCSASDAPKV | Negative |
| P81429 | NTCRIVLFYLTICIFTCSAS | Negative |
| P81429 | LFYLTICIFTCSASDAPKVR | Negative |
| P81429 | PKVRVNSGDIAGGYEYTYSG | Negative |
| P81429 | TCRIVLFYLTICIFTCSASD | Negative |
| P81429 | TCSASDAPKVRVNSGDIAGG | Negative |
| P81429 | CSASDAPKVRVNSGDIAGGY | Negative |
| P81429 | SDAPKVRVNSGDIAGGYEYT | Negative |

|        |                       |          |
|--------|-----------------------|----------|
| P81429 | FTCSASDAPKVRVNSGDIAG  | Negative |
| P81429 | ITCIFTCSASDAPKVRVNSG  | Negative |
| P81429 | CRIVLFYLITCIFTCSASDA  | Negative |
| P81429 | CIFTCSASDAPKVRVNSGDI  | Negative |
| P81429 | YLITCIFTCSASDAPKVRVN  | Negative |
| P81429 | FYLITCIFTCSASDAPKVRV  | Negative |
| P81429 | APKVRVNSGDIAGGYEYTY   | Negative |
| P81429 | NSGDIAGGYEYTYSGRKIYS  | Negative |
| P81429 | MSNTCRIVLFYLITCIFTCS  | Negative |
| P81429 | DAPKVRVNSGDIAGGYEYTY  | Negative |
| P81429 | VNSGDIAGGYEYTYSGRKIY  | Negative |
| P81429 | SNTCRIVLFYLITCIFTCSA  | Negative |
| P81429 | KVRVNSGDIAGGYEYTYSGR  | Negative |
| P81429 | TCIFTCSASDAPKVRVNSGD  | Negative |
| P81429 | LITCIFTCSASDAPKVRVNS  | Negative |
| P81429 | VRVNSGDIAGGYEYTYSGRK  | Negative |
| P81429 | ASDAPKVRVNSGDIAGGYEY  | Negative |
| P81429 | IFTCSASDAPKVRVNSGDIA  | Negative |
| P81429 | RIVLFYLITCIFTCSASDAP  | Negative |
| P81429 | SASDAPKVRVNSGDIAGGYE  | Negative |
| P81446 | FLMLGQVFGATVKAETKFSY  | Negative |
| P81446 | TKFSYERLRLRVTHQTTGEE  | Negative |
| P81446 | AWVWYFLMLGQVFGATVKA   | Negative |
| P81446 | LGQVFGATVKAETKFSYERL  | Negative |
| P81446 | SRRAWVWYFLMLGQVFGATV  | Negative |
| P81446 | MLGQVFGATVKAETKFSYER  | Negative |
| P81446 | YFLMLGQVFGATVKAETKFS  | Negative |
| P81446 | TVKAETKFSYERLRLRVTHQ  | Negative |
| P81446 | ETKFSYERLRLRVTHQTTGE  | Negative |
| P81446 | LASRRRAWVWYFLMLGQVFGA | Negative |
| P81446 | AETKFSYERLRLRVTHQTTG  | Negative |
| P81446 | ATVKAETKFSYERLRLRVTH  | Negative |
| P81446 | VWYFLMLGQVFGATVKAETK  | Negative |
| P81446 | GHLASRRRAWVWYFLMLGQVF | Negative |
| P81446 | RRRAWVWYFLMLGQVFGATVK | Negative |
| P81446 | GATVKAETKFSYERLRLRV   | Negative |
| P81446 | NGHLASRRRAWVWYFLMLGQV | Negative |
| P81446 | VKAETKFSYERLRLRVTHQT  | Negative |
| P81446 | ASRRRAWVWYFLMLGQVFGAT | Negative |
| P81446 | HLASRRRAWVWYFLMLGQVFG | Negative |
| P81446 | QVFGATVKAETKFSYERLRL  | Negative |
| P81446 | MNGHLASRRRAWVWYFLMLGQ | Negative |
| P81446 | FGATVKAETKFSYERLRLRV  | Negative |
| P81446 | RAWVWYFLMLGQVFGATVKA  | Negative |
| P81446 | WVWYFLMLGQVFGATVKAET  | Negative |
| P81446 | KAETKFSYERLRLRVTHQTT  | Negative |

|        |                      |          |
|--------|----------------------|----------|
| P81446 | WYFLMLGQVFGATVKAETKF | Negative |
| P81446 | VFGATVKAETKFSYERLRLR | Negative |
| P81446 | LMLGQVFGATVKAETKFSYE | Negative |
| P81447 | LAILNEPEDETHLEAQPTDA | Negative |
| P81447 | EDETHLEAQPTDASAQFIIS | Negative |
| P81447 | PEDETHLEAQPTDASAQFII | Negative |
| P81447 | LEAQPTDASAQFIISNLQIS | Negative |
| P81447 | KFLCILLASLAATSLAILN  | Negative |
| P81447 | LLASLAATSLAILNEPEDET | Negative |
| P81447 | ETHLEAQPTDASAQFIISNL | Negative |
| P81447 | SLAILNEPEDETHLEAQPTD | Negative |
| P81447 | ASLAATSLAILNEPEDETHL | Negative |
| P81447 | EAQPTDASAQFIISNLQIST | Negative |
| P81447 | LNEPEDETHLEAQPTDASAQ | Negative |
| P81447 | THLEAQPTDASAQFIISNLQ | Negative |
| P81447 | EPEDETHLEAQPTDASAQFI | Negative |
| P81447 | AATSLAILNEPEDETHLEAQ | Negative |
| P81447 | NEPEDETHLEAQPTDASAQF | Negative |
| P81447 | HLEAQPTDASAQFIISNLQI | Negative |
| P81447 | ILLASLAATSLAILNEPED  | Negative |
| P81447 | TSLAILNEPEDETHLEAQPT | Negative |
| P81447 | LAATSLAILNEPEDETHLEA | Negative |
| P81447 | FLCILLASLAATSLAILNE  | Negative |
| P81447 | AILNEPEDETHLEAQPTDAS | Negative |
| P81447 | LASLAATSLAILNEPEDETH | Negative |
| P81447 | ILNEPEDETHLEAQPTDASA | Negative |
| P81447 | DETHLEAQPTDASAQFIISN | Negative |
| P81447 | CILLASLAATSLAILNEPE  | Negative |
| P81447 | MKFLCILLASLAATSLAIL  | Negative |
| P81447 | SLAATSLAILNEPEDETHLE | Negative |
| P81447 | ATSLAILNEPEDETHLEAQP | Negative |
| P81447 | LLASLAATSLAILNEPEDE  | Negative |
| P81497 | PLVKKKSLRQNLIENGLLKD | Negative |
| P81497 | SECLYKVPLVKKKSLRQNLI | Negative |
| P81497 | VPLVKKKSLRQNLIENGLLK | Negative |
| P81497 | GLVALSECLYKVPLVKKKSL | Negative |
| P81497 | CLYKVPLVKKKSLRQNLIEN | Negative |
| P81497 | KLLLLLGLVALSECLYKVPL | Negative |
| P81497 | LLLLLGLVALSECLYKVPLV | Negative |
| P81497 | KKSLRQNLIENGLLKDFLAK | Negative |
| P81497 | MKKLLLLLGLVALSECLYKV | Negative |
| P81497 | RQNLIENGLLKDFLAKHNVN | Negative |
| P81497 | VALSECLYKVPLVKKKSLRQ | Negative |
| P81497 | VKKKSLRQNLIENGLLKDFL | Negative |
| P81497 | QNLIENGLLKDFLAKHNVNP | Negative |
| P81497 | LLLGLVALSECLYKVPLVKK | Negative |

|        |                      |          |
|--------|----------------------|----------|
| P81497 | SLRQNLIENGLLKDFLAKHN | Negative |
| P81497 | LGLValseclykvplvkkks | Negative |
| P81497 | KKKSLRQNLIENGLLKDFLA | Negative |
| P81497 | LRQNLIENGLLKDFLAKHNV | Negative |
| P81497 | LYKVPLVKKKSLRQNLIENG | Negative |
| P81497 | YKVPLVKKKSLRQNLIENGL | Negative |
| P81497 | ALSECLYKVPLVKKKSLRQN | Negative |
| P81497 | LSECLYKVPLVKKKSLRQNL | Negative |
| P81497 | KVPLVKKKSLRQNLIENGLL | Negative |
| P81497 | LLGLValseclykvplvkkk | Negative |
| P81497 | ECLYKVPLVKKKSLRQNLIE | Negative |
| P81497 | KSLRQNLIENGLLKDFLAKH | Negative |
| P81497 | LVKKKSLRQNLIENGLLKDF | Negative |
| P81497 | LLLGLValseclykvplvk  | Negative |
| P81497 | LValseclykvplvkkkslr | Negative |
| P81498 | VVALVCLQLEAKVTKVTLK  | Negative |
| P81498 | TKVTLKKFKSIRENLREQGL | Negative |
| P81498 | LVCLQLEAKVTKVTLKKFK  | Negative |
| P81498 | KFKSIRENLREQGLEDFLK  | Negative |
| P81498 | SIRENLREQGLEDFLKTNH  | Negative |
| P81498 | KVTLKKFKSIRENLREQGLL | Negative |
| P81498 | LQLEAKVTKVTLKKFKSIR  | Negative |
| P81498 | QLEAKVTKVTLKKFKSIRE  | Negative |
| P81498 | VTKVTLKKFKSIRENLREQG | Negative |
| P81498 | MVVALVCLQLEAKVTKVTL  | Negative |
| P81498 | FKSIRENLREQGLEDFLKT  | Negative |
| P81498 | VTLKKFKSIRENLREQGLLE | Negative |
| P81498 | VCLQLEAKVTKVTLKKFKS  | Negative |
| P81498 | KSIRENLREQGLEDFLKTN  | Negative |
| P81498 | LKKFKSIRENLREQGLLEDF | Negative |
| P81498 | IRENLREQGLEDFLKTNHY  | Negative |
| P81498 | KVTKVTLKKFKSIRENLREQ | Negative |
| P81498 | CLQLEAKVTKVTLKKFKSI  | Negative |
| P81498 | WMVVALVCLQLEAKVTKVT  | Negative |
| P81498 | LEAKVTKVTLKKFKSIRENL | Negative |
| P81498 | VALVCLQLEAKVTKVTLKK  | Negative |
| P81498 | TLKKFKSIRENLREQGLED  | Negative |
| P81498 | ALVCLQLEAKVTKVTLKKF  | Negative |
| P81498 | AKVTKVTLKKFKSIRENLRE | Negative |
| P81498 | EAKVTKVTLKKFKSIRENLR | Negative |
| P81498 | MKWMVVALVCLQLEAKVTK  | Negative |
| P81498 | KKFKSIRENLREQGLEDFL  | Negative |
| P81498 | LLEAKVTKVTLKKFKSIREN | Negative |
| P81498 | RENLRREQGLEDFLKTNHYD | Negative |
| P81534 | LFLVPVPGHGGIINTLQKYY | Negative |
| P81534 | LLFALLFLFLVPVPGHGGII | Negative |

|        |                        |          |
|--------|------------------------|----------|
| P81534 | KYYCRVRGGRC AVL SCLPKE | Negative |
| P81534 | FLVPVPGHGGIINTLQKYYC   | Negative |
| P81534 | GHGGIINTLQKYYCRVRGGR   | Negative |
| P81534 | PGHGGIINTLQKYYCRVRGG   | Negative |
| P81534 | LQKYYCRVRGGRC AVL SCLP | Negative |
| P81534 | RIHYLLFALLFLFLVPVPGH   | Negative |
| P81534 | GGIINTLQKYYCRVRGGRCA   | Negative |
| P81534 | NTLQKYYCRVRGGRC AVL SC | Negative |
| P81534 | HYLLFALLFLFLVPVPGHGG   | Negative |
| P81534 | LFALLFLFLVPVPGHGGIIN   | Negative |
| P81534 | IINTLQKYYCRVRGGRC AVL  | Negative |
| P81534 | LFLFLVPVPGHGGIINTLQK   | Negative |
| P81534 | QKYYCRVRGGRC AVL SCLPK | Negative |
| P81534 | INTLQKYYCRVRGGRC AVLS  | Negative |
| P81534 | PVPGHGGIINTLQKYYCRVR   | Negative |
| P81534 | GIINTLQKYYCRVRGGRC AV  | Negative |
| P81534 | VPGHGGIINTLQKYYCRVRG   | Negative |
| P81534 | LLFLFLVPVPGHGGIINTLQ   | Negative |
| P81534 | MRIHYLLFALLFLFLVPVPG   | Negative |
| P81534 | TLQKYYCRVRGGRC AVL SCL | Negative |
| P81534 | ALLFLFLVPVPGHGGIINTL   | Negative |
| P81534 | FLFLVPVPGHGGIINTLQKY   | Negative |
| P81534 | YLLFALLFLFLVPVPGHGGI   | Negative |
| P81534 | HGGIINTLQKYYCRVRGGRC   | Negative |
| P81534 | IHYLLFALLFLFLVPVPGHG   | Negative |
| P81534 | VPVPGHGGIINTLQKYYCRV   | Negative |
| P81534 | LVPVPGHGGIINTLQKYYCR   | Negative |
| P81549 | ESLAAAI AVPLLGLLPAAQA  | Negative |
| P81549 | IAVPLLGLLPAAQA ASTAVQ  | Negative |
| P81549 | PESLAAAI AVPLLGLLPAAQ  | Negative |
| P81549 | KFYSSHMPESLAAAI AVPL   | Negative |
| P81549 | QA ASTAVQLPSVTVEGEYSS  | Negative |
| P81549 | GLLPAAQA ASTAVQLPSVTV  | Negative |
| P81549 | AQA ASTAVQLPSVTVEGEYS  | Negative |
| P81549 | LAAAI AVPLLGLLPAAQAAS  | Negative |
| P81549 | MPESLAAAI AVPLLGLLPAA  | Negative |
| P81549 | LPAAQA ASTAVQLPSVTVEG  | Negative |
| P81549 | PAAQA ASTAVQLPSVTVEGE  | Negative |
| P81549 | AVPLLGLLPAAQA ASTAVQL  | Negative |
| P81549 | SSHMPESLAAAI AVPLLGL   | Negative |
| P81549 | LGLLPAAQA ASTAVQLPSVT  | Negative |
| P81549 | AAQA ASTAVQLPSVTVEGEY  | Negative |
| P81549 | PLLGLLPAAQA ASTAVQLPS  | Negative |
| P81549 | SLAAAI AVPLLGLLPAAQAA  | Negative |
| P81549 | YSSHMPESLAAAI AVPLLG   | Negative |
| P81549 | AA STAVQLPSVTVEGEYSSY  | Negative |



|        |                       |          |
|--------|-----------------------|----------|
| P81549 | AAAI VPLLGLLPAAQAAS T | Negative |
| P81549 | LLGLLPAAQAAS TAVQLPSV | Negative |
| P81549 | LLPAAQAAS TAVQLPSVTVE | Negative |
| P81549 | PMPESLAAAI VPLLGLLP A | Negative |
| P81549 | AAI VPLLGLLPAAQAAS TA | Negative |
| P81549 | HPMPESLAAAI VPLLGLLP  | Negative |
| P81549 | VPLLGLLPAAQAAS TAVQLP | Negative |
| P81549 | MKFYSSHMPESLAAAI V    | Negative |
| P81549 | SHMPESLAAAI VPLLGLL   | Negative |
| P81549 | FYSSHMPESLAAAI VPLL   | Negative |
| P81605 | EAASAPGSGNPCHEASAAQK  | Negative |
| P81605 | FLTALAGALVCAYDPEAASA  | Negative |
| P81605 | ASAPGSGNPCHEASAAQKEN  | Negative |
| P81605 | APGSGNPCHEASAAQKENAG  | Negative |
| P81605 | ALVCAYDPEAASAPGSGNPC  | Negative |
| P81605 | PEAASAPGSGNPCHEASAAQ  | Negative |
| P81605 | RFMTLLFLTALAGALVCAYD  | Negative |
| P81605 | PGSGNPCHEASAAQKENAGE  | Negative |
| P81605 | FMTLLFLTALAGALVCAYDP  | Negative |
| P81605 | MTLLFLTALAGALVCAYDPE  | Negative |
| P81605 | CAYDPEAASAPGSGNPCHEA  | Negative |
| P81605 | VCAYDPEAASAPGSGNPCHE  | Negative |
| P81605 | GSGNPCHEASAAQKENAGED  | Negative |
| P81605 | AASAPGSGNPCHEASAAQKE  | Negative |
| P81605 | GALVCAYDPEAASAPGSGNP  | Negative |
| P81605 | ALAGALVCAYDPEAASAPGS  | Negative |
| P81605 | SGNPCHEASAAQKENAGEDP  | Negative |
| P81605 | YDPEAASAPGSGNPCHEASA  | Negative |
| P81605 | MRFMTLLFLTALAGALVCAY  | Negative |
| P81605 | LAGALVCAYDPEAASAPGSG  | Negative |
| P81605 | LFLTALAGALVCAYDPEAAS  | Negative |
| P81605 | AYDPEAASAPGSGNPCHEAS  | Negative |
| P81605 | LTALAGALVCAYDPEAASAP  | Negative |
| P81605 | LLFLTALAGALVCAYDPEAA  | Negative |
| P81605 | AGALVCAYDPEAASAPGSGN  | Negative |
| P81605 | SAPGSGNPCHEASAAQKENA  | Negative |
| P81605 | TALAGALVCAYDPEAASAPG  | Negative |
| P81605 | LVCA YDPEAASAPGSGNPCH | Negative |
| P81605 | DPEAASAPGSGNPCHEASAA  | Negative |
| P81608 | GQDVVTSNFDASKIAGEWYS  | Negative |
| P81608 | VTSNFDASKIAGEWYSILLA  | Negative |
| P81608 | SSHKEAGQDVVTSNFDASKI  | Negative |
| P81608 | FDASKIAGEWYSILLASDAK  | Negative |
| P81608 | TLASSHKEAGQDVVTSNFDA  | Negative |
| P81608 | AGQDVVTSNFDASKIAGEWY  | Negative |
| P81608 | DVVTSNFDASKIAGEWYSIL  | Negative |

|        |                      |          |
|--------|----------------------|----------|
| P81608 | MKLLLLLCLGLTLASSHKEA | Negative |
| P81608 | ASSHKEAGQDVVTSNFDASK | Negative |
| P81608 | DASKIAGEWYSILLASDAKE | Negative |
| P81608 | LLLLLCLGLTLASSHKEAGQ | Negative |
| P81608 | LASSHKEAGQDVVTSNFDAS | Negative |
| P81608 | SNFDASKIAGEWYSILLASD | Negative |
| P81608 | LGLTLASSHKEAGQDVVTSN | Negative |
| P81608 | LCLGLTLASSHKEAGQDVVT | Negative |
| P81608 | KEAGQDVVTSNFDASKIAGE | Negative |
| P81608 | QDVVTSNFDASKIAGEWYSI | Negative |
| P81608 | SHKEAGQDVVTSNFDASKIA | Negative |
| P81608 | NFDASKIAGEWYSILLASDA | Negative |
| P81608 | LLCLGLTLASSHKEAGQDVV | Negative |
| P81608 | EAGQDVVTSNFDASKIAGEW | Negative |
| P81608 | TSNFDASKIAGEWYSILLAS | Negative |
| P81608 | HKEAGQDVVTSNFDASKIAG | Negative |
| P81608 | GLTLASSHKEAGQDVVTSNF | Negative |
| P81608 | LTLASSHKEAGQDVVTSNFD | Negative |
| P81608 | CLGLTLASSHKEAGQDVVTS | Negative |
| P81608 | VVTSNFDASKIAGEWYSILL | Negative |
| P81608 | LLLCLGLTLASSHKEAGQD  | Negative |
| P81608 | LLLCLGLTLASSHKEAGQDV | Negative |
| P81623 | MAAAIPRAASLSPLFPLLFL | Negative |
| P81623 | GLHTKGALPLDTITFYKVIP | Negative |
| P81623 | LFPLLFLLSAPQDSSGLHTK | Negative |
| P81623 | APQDSSGLHTKGALPLDTIT | Negative |
| P81623 | FLLSAPQDSSGLHTKGALPL | Negative |
| P81623 | SSGLHTKGALPLDTITFYKV | Negative |
| P81623 | LSAPQDSSGLHTKGALPLDT | Negative |
| P81623 | RAASLSPLFPLLFLLSAPQD | Negative |
| P81623 | LHTKGALPLDTITFYKVIPK | Negative |
| P81623 | LFLLSAPQDSSGLHTKGALP | Negative |
| P81623 | PLFPLLFLLSAPQDSSGLHT | Negative |
| P81623 | PQDSSGLHTKGALPLDTITF | Negative |
| P81623 | LLFLLSAPQDSSGLHTKGAL | Negative |
| P81623 | SPLFPLLFLLSAPQDSSGLH | Negative |
| P81623 | ASLSPLFPLLFLLSAPQDSS | Negative |
| P81623 | AASLSPLFPLLFLLSAPQDS | Negative |
| P81623 | AAIPRAASLSPLFPLLFLLS | Negative |
| P81623 | LSPLFPLLFLLSAPQDSSGL | Negative |
| P81623 | IPRAASLSPLFPLLFLLSAP | Negative |
| P81623 | SGLHTKGALPLDTITFYKVI | Negative |
| P81623 | LLSAPQDSSGLHTKGALPLD | Negative |
| P81623 | AAAIPRAASLSPLFPLLFL  | Negative |
| P81623 | PRAASLSPLFPLLFLLSAPQ | Negative |
| P81623 | PLLFLLSAPQDSSGLHTKGA | Negative |

|        |                      |          |
|--------|----------------------|----------|
| P81623 | SLSPFLPLLFLLSAPQDSSG | Negative |
| P81623 | QDSSGLHTKGALPLDTITFY | Negative |
| P81623 | AIPRAASLSPLFPLLFLLSA | Negative |
| P81623 | SAPQDSSGLHTKGALPLDTI | Negative |
| P81623 | DSSGLHTKGALPLDTITFYK | Negative |
| P81715 | RLAAVTAFAVAGLFASAVPA | Negative |
| P81715 | SLSVSRRLAAVTAFAVAGLF | Negative |
| P81715 | LSVSRRLAAVTAFAVAGLFA | Negative |
| P81715 | AAPSAVAAAPTPPDIPLANV | Negative |
| P81715 | FASAVPAALAAPSAVAAAPT | Negative |
| P81715 | FAVAGLFASAVPAALAAPS  | Negative |
| P81715 | ASAVPAALAAPSAVAAAPTP | Negative |
| P81715 | LAAPSAVAAAPTPPDIPLAN | Negative |
| P81715 | AAVTAFAVAGLFASAVPAAL | Negative |
| P81715 | RRLAAVTAFAVAGLFASAVP | Negative |
| P81715 | FAVAGLFASAVPAALAAPSA | Negative |
| P81715 | VSRRLAAVTAFAVAGLFASA | Negative |
| P81715 | TAFAVAGLFASAVPAALAAP | Negative |
| P81715 | PAALAAPSAVAAAPTPPDIP | Negative |
| P81715 | MSLSVSRRLAAVTAFAVAGL | Negative |
| P81715 | GLFASAVPAALAAPSAVAAA | Negative |
| P81715 | AVPAALAAPSAVAAAPTPPD | Negative |
| P81715 | VAGLFASAVPAALAAPSAVA | Negative |
| P81715 | LFASAVPAALAAPSAVAAAP | Negative |
| P81715 | AVTAFAVAGLFASAVPAALA | Negative |
| P81715 | ALAAPSAVAAAPTPPDIPLA | Negative |
| P81715 | VPAALAAPSAVAAAPTPPDI | Negative |
| P81715 | SRRLAAVTAFAVAGLFASAV | Negative |
| P81715 | AVAGLFASAVPAALAAPSAV | Negative |
| P81715 | SVSRRLAAVTAFAVAGLFAS | Negative |
| P81715 | VTAFAVAGLFASAVPAALAA | Negative |
| P81715 | LAAVTAFAVAGLFASAVPAA | Negative |
| P81715 | AALAAPSAVAAAPTPPDIPL | Negative |
| P81715 | AGLFASAVPAALAAPSAVAA | Negative |
| P81761 | FLTVMTATLSEARCGPCFTT | Negative |
| P81761 | TLSEARCGPCFTTDPQTQAK | Negative |
| P81761 | EARCGPCFTTDPQTQAKCSE | Negative |
| P81761 | PCFTTDPQTQAKCSECCGRK | Negative |
| P81761 | SEARCGPCFTTDPQTQAKCS | Negative |
| P81761 | GVILIALFLTVMTATLSEAR | Negative |
| P81761 | KFLYGVILIALFLTVMTATL | Negative |
| P81761 | LFLTVMTATLSEARCGPCFT | Negative |
| P81761 | VILIALFLTVMTATLSEARC | Negative |
| P81761 | FLYGVILIALFLTVMTATLS | Negative |
| P81761 | YGVILIALFLTVMTATLSEA | Negative |
| P81761 | VMTATLSEARCGPCFTTDPQ | Negative |

|        |                       |          |
|--------|-----------------------|----------|
| P81761 | FTTDPQTQAKCSECCGRKGG  | Negative |
| P81761 | MTATLSEARCGPCFTTDPQT  | Negative |
| P81761 | LIALFLTVMTATLSEARCGP  | Negative |
| P81761 | GPCFTTDPQTQAKCSECCGR  | Negative |
| P81761 | MKFLYGVILIALFLTVMTAT  | Negative |
| P81761 | RCGPCFTTDPQTQAKCSECC  | Negative |
| P81761 | CGPCFTTDPQTQAKCSECCG  | Negative |
| P81761 | ARCGPCFTTDPQTQAKCSEC  | Negative |
| P81761 | CFTTDPQTQAKCSECCGRKG  | Negative |
| P81761 | ILIALFLTVMTATLSEARCG  | Negative |
| P81761 | LTVMTATLSEARCGPCFTTD  | Negative |
| P81761 | LYGVILIALFLTVMTATLSE  | Negative |
| P81761 | TATLSEARCGPCFTTDPQTQ  | Negative |
| P81761 | ALFLTVMTATLSEARCGPCF  | Negative |
| P81761 | ATLSEARCGPCFTTDPQTQA  | Negative |
| P81761 | TVMTATLSEARCGPCFTTDP  | Negative |
| P81761 | LSEARCGPCFTTDPQTQAKC  | Negative |
| P81783 | DLGYTMKCKICNFDTCRAGE  | Negative |
| P81783 | LLTLVVVTIVCLDLGYTMKC  | Negative |
| P81783 | LDLGYTMKCKICNFDTCRAG  | Negative |
| P81783 | LLLTLVVVTIVCLDLGYTMK  | Negative |
| P81783 | ICNFDTCRAGELKVCASGEK  | Negative |
| P81783 | FDTCRAGELKVCASGEKYCF  | Negative |
| P81783 | VCLDLGYTMKCKICNFDTCR  | Negative |
| P81783 | YTMKCKICNFDTCRAGELKV  | Negative |
| P81783 | NFDTCRAGELKVCASGEKYC  | Negative |
| P81783 | VVVVTIVCLDLGYTMKCKICN | Negative |
| P81783 | TIVCLDLGYTMKCKICNFDT  | Negative |
| P81783 | CKICNFDTCRAGELKVCASG  | Negative |
| P81783 | LTLVVVTIVCLDLGYTMKCK  | Negative |
| P81783 | MKTLLLTLVVVTIVCLDLGY  | Negative |
| P81783 | GYTMKCKICNFDTCRAGELK  | Negative |
| P81783 | CNFDTCRAGELKVCASGEKY  | Negative |
| P81783 | TLLLTLVVVTIVCLDLGYTM  | Negative |
| P81783 | KICNFDTCRAGELKVCASGE  | Negative |
| P81783 | IVCLDLGYTMKCKICNFDTC  | Negative |
| P81783 | TMKCKICNFDTCRAGELKVC  | Negative |
| P81783 | LGYTMKCKICNFDTCRAGEL  | Negative |
| P81783 | KCKICNFDTCRAGELKVCAS  | Negative |
| P81783 | DTCRAGELKVCASGEKYCFK  | Negative |
| P81783 | VVTIVCLDLGYTMKCKICNF  | Negative |
| P81783 | VTIVCLDLGYTMKCKICNFD  | Negative |
| P81783 | KTLLLTLVVVTIVCLDLGYT  | Negative |
| P81783 | MKCKICNFDTCRAGELKVCA  | Negative |
| P81783 | LVVVVTIVCLDLGYTMKCKIC | Negative |
| P81783 | CLDLGYTMKCKICNFDTCRA  | Negative |

|        |                        |          |
|--------|------------------------|----------|
| P81828 | ALQCFRCTSF DSTGFCHVGR  | Negative |
| P81828 | LQCFRCTSF DSTGFCHVGRQ  | Negative |
| P81828 | LALQCFRCTSF DSTGFCHVG  | Negative |
| P81828 | MGKHILLPLGLSLLMSSLL    | Negative |
| P81828 | TSF DSTGFCHVGRQKCQ TYP | Negative |
| P81828 | FRCTSF DSTGFCHVGRQKCQ  | Negative |
| P81828 | LLLPLGLSLLMSSLLALQCF   | Negative |
| P81828 | QCFRCTSF DSTGFCHVGRQK  | Negative |
| P81828 | FDSTGFCHVGRQKCQ TYPDE  | Negative |
| P81828 | KHILLPLGLSLLMSSLLAL    | Negative |
| P81828 | SSLLALQCFRCTSF DSTGFC  | Negative |
| P81828 | CTSF DSTGFCHVGRQKCQ TY | Negative |
| P81828 | LLMSSLLALQCFRCTSF DST  | Negative |
| P81828 | ILLPLGLSLLMSSLLALQC    | Negative |
| P81828 | MSSLLALQCFRCTSF DSTGF  | Negative |
| P81828 | LLALQCFRCTSF DSTGFCHV  | Negative |
| P81828 | GKHILLPLGLSLLMSSLLA    | Negative |
| P81828 | LPLGLSLLMSSLLALQCFRC   | Negative |
| P81828 | LGLSLLMSSLLALQCFRCTS   | Negative |
| P81828 | PLGLSLLMSSLLALQCFRCT   | Negative |
| P81828 | RCTSF DSTGFCHVGRQKCQT  | Negative |
| P81828 | SF DSTGFCHVGRQKCQ TYPD | Negative |
| P81828 | CFRCTSF DSTGFCHVGRQKC  | Negative |
| P81828 | LMSSLLALQCFRCTSF DSTG  | Negative |
| P81828 | GLSLLMSSLLALQCFRCTSF   | Negative |
| P81828 | SLLALQCFRCTSF DSTGFCH  | Negative |
| P81828 | HILLPLGLSLLMSSLLALQ    | Negative |
| P81828 | LSLLMSSLLALQCFRCTSF D  | Negative |
| P81828 | SLLMSSLLALQCFRCTSF DS  | Negative |
| P81894 | VFCAGLAFAADELTFKAKNG   | Negative |
| P81894 | MKRIIASLALSVFCAGLAFA   | Negative |
| P81894 | TFKAKNGDVKFPHKKHQVV    | Negative |
| P81894 | KNGDVKFPHKKHQVVGNCK    | Negative |
| P81894 | LTFKAKNGDVKFPHKKHQV    | Negative |
| P81894 | AGLAFAADELTFKAKNGDVK   | Negative |
| P81894 | KAKNGDVKFPHKKHQVVGN    | Negative |
| P81894 | KRIIASLALSVFCAGLAFAA   | Negative |
| P81894 | SVFCAGLAFAADELTFKAKN   | Negative |
| P81894 | DELTFKAKNGDVKFPHKKHQ   | Negative |
| P81894 | LALSVFCAGLAFAADELTFK   | Negative |
| P81894 | FAADELTFKAKNGDVKFPHK   | Negative |
| P81894 | ADELTFKAKNGDVKFPHKKH   | Negative |
| P81894 | RIIASLALSVFCAGLAFAAD   | Negative |
| P81894 | ALSVFCAGLAFAADELTFKA   | Negative |
| P81894 | AFAADELTFKAKNGDVKFPH   | Negative |
| P81894 | AKNGDVKFPHKKHQVVGN     | Negative |

|        |                      |          |
|--------|----------------------|----------|
| P81894 | IIASLALSVFCAGLAFAADE | Negative |
| P81894 | LAFAADELTFKAKNGDVKFP | Negative |
| P81894 | FKAKNGDVKFPHKKHQVVG  | Negative |
| P81894 | CAGLAFAADELTFKAKNGDV | Negative |
| P81894 | FCAGLAFAADELTFKAKNGD | Negative |
| P81894 | SLALSVFCAGLAFAADELTF | Negative |
| P81894 | IASLALSVFCAGLAFAADEL | Negative |
| P81894 | ELTFKAKNGDVKFPHKKHQQ | Negative |
| P81894 | GLAFAADELTFKAKNGDVKF | Negative |
| P81894 | AADELTFKAKNGDVKFPHKK | Negative |
| P81894 | NGDVKFPHKKHQVVGNCCKK | Negative |
| P81894 | LSVFCAGLAFAADELTFKAK | Negative |
| P81941 | GSFFKKAHVKGKHVGAALT  | Negative |
| P81941 | GWGSFFKKAHVKGKHVGA   | Negative |
| P81941 | FKKAHVKGKHVGAALTHYL  | Negative |
| P81941 | MKFTATFLMMAIFVLMVEPG | Negative |
| P81941 | VEPGECGWGSFFKKAHVKGK | Negative |
| P81941 | MVEPGECGWGSFFKKAHVKG | Negative |
| P81941 | GECGWGSFFKKAHVKGKHV  | Negative |
| P81941 | SFFKKAHVKGKHVGAALTH  | Negative |
| P81941 | AIFVLMVEPGECGWGSFFKK | Negative |
| P81941 | EPGECGWGSFFKKAHVKGK  | Negative |
| P81941 | MAIFVLMVEPGECGWGSFFK | Negative |
| P81941 | ATFLMMAIFVLMVEPGECGW | Negative |
| P81941 | PGECGWGSFFKKAHVKGK   | Negative |
| P81941 | MMAIFVLMVEPGECGWGSFF | Negative |
| P81941 | IFVLMVEPGECGWGSFFKKA | Negative |
| P81941 | KAAHVKGKHVGAALTHYLG  | Negative |
| P81941 | WGSFFKKAHVKGKHVGAAL  | Negative |
| P81941 | TATFLMMAIFVLMVEPGECG | Negative |
| P81941 | FVLMVEPGECGWGSFFKKA  | Negative |
| P81941 | LMVEPGECGWGSFFKKAHV  | Negative |
| P81941 | FFKKAHVKGKHVGAALTHY  | Negative |
| P81941 | KFTATFLMMAIFVLMVEPGE | Negative |
| P81941 | CGWGSFFKKAHVKGKHVGA  | Negative |
| P81941 | FLMMAIFVLMVEPGECGWGS | Negative |
| P81941 | FTATFLMMAIFVLMVEPGE  | Negative |
| P81941 | ECGWGSFFKKAHVKGKHV   | Negative |
| P81941 | VLMVEPGECGWGSFFKKAH  | Negative |
| P81941 | TFLMMAIFVLMVEPGECGW  | Negative |
| P81941 | KKAHVKGKHVGAALTHYLG  | Negative |
| P81999 | GAAIAGRDFYKILGVPRSAS | Negative |
| P81999 | KILGVPRSASIKDIKKAYRK | Negative |
| P81999 | LLYLLGAAIAGRDFYKILG  | Negative |
| P81999 | LLYLLGAAIAGRDFYKILGV | Negative |
| P81999 | FYKILGVPRSASIKDIKKAY | Negative |

|        |                      |          |
|--------|----------------------|----------|
| P81999 | DFYKILGVPRSASIKDIKKA | Negative |
| P81999 | LGVPRSASIKDIKKAYRKLA | Negative |
| P81999 | LGTLCLLLLYLLGAAIAGR  | Negative |
| P81999 | IAGRDFYKILGVPRSASIKD | Negative |
| P81999 | GTLCLLLLYLLGAAIAGRDF | Negative |
| P81999 | LYLLGAAIAGRDFYKILGVP | Negative |
| P81999 | YKILGVPRSASIKDIKKAYR | Negative |
| P81999 | MAPQNLGTLCLLLLYLLGAA | Negative |
| P81999 | LLLLYLLGAAIAGRDFYKIL | Negative |
| P81999 | RDFYKILGVPRSASIKDIKK | Negative |
| P81999 | GRDFYKILGVPRSASIKDIK | Negative |
| P81999 | QNLGTLCLLLLYLLGAAIAG | Negative |
| P81999 | AGRDFYKILGVPRSASIKDI | Negative |
| P81999 | YLLGAAIAGRDFYKILGVPR | Negative |
| P81999 | NLGTLCLLLLYLLGAAIAGR | Negative |
| P81999 | AAIAGRDFYKILGVPRSASI | Negative |
| P81999 | CLLLLYLLGAAIAGRDFYKI | Negative |
| P81999 | PQNLGTLCLLLLYLLGAAIA | Negative |
| P81999 | LGAAIAGRDFYKILGVPRSA | Negative |
| P81999 | ILGVPRSASIKDIKKAYRKL | Negative |
| P81999 | LCLLLLYLLGAAIAGRDFYK | Negative |
| P81999 | LLGAAIAGRDFYKILGVPRS | Negative |
| P81999 | AIAGRDFYKILGVPRSASIK | Negative |
| P81999 | APQNLGTLCLLLLYLLGAAI | Negative |
| P82007 | GVAILAMIVMAQLMVHPSVA | Negative |
| P82007 | VMAQLMVHPSVAITCNDVTG | Negative |
| P82007 | SMGVAILAMIVMAQLMVHPS | Negative |
| P82007 | LMVHPSVAITCNDVTGNLTP | Negative |
| P82007 | HPSVAITCNDVTGNLTPCLP | Negative |
| P82007 | ILAMIVMAQLMVHPSVAITC | Negative |
| P82007 | MAQLMVHPSVAITCNDVTGN | Negative |
| P82007 | AITCNDVTGNLTPCLPYLRS | Negative |
| P82007 | SVAITCNDVTGNLTPCLPYL | Negative |
| P82007 | TCNDVTGNLTPCLPYLRSGG | Negative |
| P82007 | MGVAILAMIVMAQLMVHPSV | Negative |
| P82007 | VHPSVAITCNDVTGNLTPCL | Negative |
| P82007 | MKGTSMGVAILAMIVMAQLM | Negative |
| P82007 | VAILAMIVMAQLMVHPSVAI | Negative |
| P82007 | ITCNDVTGNLTPCLPYLRSG | Negative |
| P82007 | MVHPSVAITCNDVTGNLTPC | Negative |
| P82007 | MIVMAQLMVHPSVAITCNDV | Negative |
| P82007 | TSMGVAILAMIVMAQLMVHP | Negative |
| P82007 | KGTSMGVAILAMIVMAQLMV | Negative |
| P82007 | VAITCNDVTGNLTPCLPYLR | Negative |
| P82007 | QLMVHPSVAITCNDVTGNLT | Negative |
| P82007 | CNDVTGNLTPCLPYLRSGGK | Negative |

|        |                      |          |
|--------|----------------------|----------|
| P82007 | LAMIVMAQLMVHPSVAITCN | Negative |
| P82007 | AILAMIVMAQLMVHPSVAIT | Negative |
| P82007 | PSVAITCNDVTGNLTPCLPY | Negative |
| P82007 | IVMAQLMVHPSVAITCNDVT | Negative |
| P82007 | GTSMGVAILAMIVMAQLMVH | Negative |
| P82007 | NDVTGNLTPCLPYLRSGGKP | Negative |
| P82007 | AQLMVHPSVAITCNDVTGNL | Negative |
| P82102 | TMLLAVVVAVFVAGTEAHPH | Negative |
| P82102 | TEAHPHVCTSYYCSKFCGTA | Negative |
| P82102 | AVFVAGTEAHPHVCTSYYCS | Negative |
| P82102 | AGTEAHPHVCTSYYCSKFCG | Negative |
| P82102 | CSKFCGTAGCTRYGCRNLHR | Negative |
| P82102 | VVAVFVAGTEAHPHVCTSYY | Negative |
| P82102 | TSYYCSKFCGTAGCTRYGCR | Negative |
| P82102 | VFVAGTEAHPHVCTSYYCSK | Negative |
| P82102 | AVVVAVFVAGTEAHPHVCTS | Negative |
| P82102 | EAHPHVCTSYYCSKFCGTAG | Negative |
| P82102 | CTSYYCSKFCGTAGCTRYGC | Negative |
| P82102 | YCSKFCGTAGCTRYGCRNLH | Negative |
| P82102 | VAVFVAGTEAHPHVCTSYYC | Negative |
| P82102 | HVCTSYYCSKFCGTAGCTRY | Negative |
| P82102 | AHPHVCTSYYCSKFCGTAGC | Negative |
| P82102 | FVAGTEAHPHVCTSYYCSKF | Negative |
| P82102 | VAGTEAHPHVCTSYYCSKFC | Negative |
| P82102 | KATMLLAVVVAVFVAGTEAH | Negative |
| P82102 | MLLAVVVAVFVAGTEAHPHV | Negative |
| P82102 | MKATMLLAVVVAVFVAGTEA | Negative |
| P82102 | LAVVVAVFVAGTEAHPHVCT | Negative |
| P82102 | GTEAHPHVCTSYYCSKFCGT | Negative |
| P82102 | ATMLLAVVVAVFVAGTEAHP | Negative |
| P82102 | YYCSKFCGTAGCTRYGCRNL | Negative |
| P82102 | VVVAVFVAGTEAHPHVCTSY | Negative |
| P82102 | PHVCTSYYCSKFCGTAGCTR | Negative |
| P82102 | VCTSYYCSKFCGTAGCTRYG | Negative |
| P82102 | HPHVCTSYYCSKFCGTAGCT | Negative |
| P82102 | SYCSKFCGTAGCTRYGCRN  | Negative |
| P82103 | CTSYWCGKFCGTASCTHYLC | Negative |
| P82103 | HACTSYWCGKFCGTASCTHY | Negative |
| P82103 | VAGTEAHSHACTSYWCGKFC | Negative |
| P82103 | LAVLVAVFVAGTEAHSHACT | Negative |
| P82103 | GTEAHSHACTSYWCGKFCGT | Negative |
| P82103 | SHACTSYWCGKFCGTASCTH | Negative |
| P82103 | AVLVAVFVAGTEAHSHACTS | Negative |
| P82103 | WCGKFCGTASCTHYLCRVLH | Negative |
| P82103 | VAVFVAGTEAHSHACTSYWC | Negative |
| P82103 | ILLAVLVAVFVAGTEAHSHA | Negative |



|        |                      |          |
|--------|----------------------|----------|
| P82103 | AVFVAGTEAHSHACTSYWCG | Negative |
| P82103 | FVAGTEAHSHACTSYWCGKF | Negative |
| P82103 | AGTEAHSHACTSYWCGKFCG | Negative |
| P82103 | TSYWCGKFCGTASCTHYLCR | Negative |
| P82103 | ATILLAVLVAVFVAGTEAHS | Negative |
| P82103 | VLVAVFVAGTEAHSHACTSY | Negative |
| P82103 | TEAHSHACTSYWCGKFCGTA | Negative |
| P82103 | LVAVFVAGTEAHSHACTSYW | Negative |
| P82103 | SYWCGKFCGTASCTHYLCRV | Negative |
| P82103 | MKATILLAVLVAVFVAGTEA | Negative |
| P82103 | YWCGKFCGTASCTHYLCRVL | Negative |
| P82103 | CGKFCGTASCTHYLCRVLHP | Negative |
| P82103 | VFVAGTEAHSHACTSYWCGK | Negative |
| P82103 | ACTSYWCGKFCGTASCTHYL | Negative |
| P82103 | AHSHACTSYWCGKFCGTASC | Negative |
| P82103 | HSHACTSYWCGKFCGTASCT | Negative |
| P82103 | EAHSHACTSYWCGKFCGTAS | Negative |
| P82103 | TILLAVLVAVFVAGTEAHSH | Negative |
| P82103 | KATILLAVLVAVFVAGTEAH | Negative |
| P82143 | MQPGKRCNGSMMTCKDNEDT | Negative |
| P82143 | FCCLLGTFLAIGMCLECEVC | Negative |
| P82143 | CCLLGTFLAIGMCLECEVCM | Negative |
| P82143 | CMQPGKRCNGSMMTCKDNED | Negative |
| P82143 | FLAIGMCLECEVCMQPGKRC | Negative |
| P82143 | GMCLECEVCMQPGKRCNGSM | Negative |
| P82143 | CEVCMQPGKRCNGSMMTCKD | Negative |
| P82143 | QPGKRCNGSMMTCKDNEDTC | Negative |
| P82143 | VCMQPGKRCNGSMMTCKDNE | Negative |
| P82143 | CLLGTFLAIGMCLECEVCMQ | Negative |
| P82143 | LAIGMCLECEVCMQPGKRCN | Negative |
| P82143 | MKSFLFCCLLGTFLAIGMCL | Negative |
| P82143 | LLGTFLAIGMCLECEVCMQP | Negative |
| P82143 | CLECEVCMQPGKRCNGSMMT | Negative |
| P82143 | AIGMCLECEVCMQPGKRCNG | Negative |
| P82143 | GKRCNGSMMTCKDNEDTCVM | Negative |
| P82143 | ECEVCMQPGKRCNGSMMTCK | Negative |
| P82143 | FLFCCLLGTFLAIGMCLECE | Negative |
| P82143 | KSFLFCCLLGTFLAIGMCLE | Negative |
| P82143 | LGTFLAIGMCLECEVCMQPG | Negative |
| P82143 | EVCMQPGKRCNGSMMTCKDN | Negative |
| P82143 | SFLFCCLLGTFLAIGMCLEC | Negative |
| P82143 | KRCNGSMMTCKDNEDTCVMF | Negative |
| P82143 | IGMCLECEVCMQPGKRCNGS | Negative |
| P82143 | TFLAIGMCLECEVCMQPGKR | Negative |
| P82143 | PGKRCNGSMMTCKDNEDTCV | Negative |
| P82143 | MCLECEVCMQPGKRCNGSMM | Negative |

|        |                       |          |
|--------|-----------------------|----------|
| P82143 | GTFLAIGMCLECEVCMQPGK  | Negative |
| P82143 | LECEVCMQPGKRCNGSMTC   | Negative |
| P82144 | GNSRSCDYCHNIGKDCDGYE  | Negative |
| P82144 | CLLFIFIARGNSRSCDYCHN  | Negative |
| P82144 | SCDYCHNIGKDCDGYEHECS  | Negative |
| P82144 | LHTICLLFIFIARGNSRSCD  | Negative |
| P82144 | KSLHTICLLFIFIARGNSRS  | Negative |
| P82144 | SLHTICLLFIFIARGNSRSC  | Negative |
| P82144 | MKSLHTICLLFIFIARGNSR  | Negative |
| P82144 | CHNIGKDCDGYEHECSPED   | Negative |
| P82144 | SRSCDYCHNIGKDCDGYEHE  | Negative |
| P82144 | RSCDYCHNIGKDCDGYEHEC  | Negative |
| P82144 | IFIARGNSRSCDYCHNIGKD  | Negative |
| P82144 | NSRSCDYCHNIGKDCDGYEH  | Negative |
| P82144 | TICLLFIFIARGNSRSCDYC  | Negative |
| P82144 | LLFIFIARGNSRSCDYCHNI  | Negative |
| P82144 | RGNSRSCDYCHNIGKDCDGY  | Negative |
| P82144 | FIFIARGNSRSCDYCHNIGK  | Negative |
| P82144 | DYCHNIGKDCDGYEHECSP   | Negative |
| P82144 | IARGNSRSCDYCHNIGKDCD  | Negative |
| P82144 | ARGNSRSCDYCHNIGKDCDG  | Negative |
| P82144 | YCHNIGKDCDGYEHECSP    | Negative |
| P82144 | FIARGNSRSCDYCHNIGKDC  | Negative |
| P82144 | CDYCHNIGKDCDGYEHECSS  | Negative |
| P82144 | HNIGKDCDGYEHECSPEDV   | Negative |
| P82144 | KDCDGYEHECSPEDVCGKV   | Negative |
| P82144 | GKDCDGYEHECSPEDVCGK   | Negative |
| P82144 | NIGKDCDGYEHECSPEDVC   | Negative |
| P82144 | LFIFIARGNSRSCDYCHNIG  | Negative |
| P82144 | ICLLFIFIARGNSRSCDYCH  | Negative |
| P82144 | IGKDCDGYEHECSPEDVCG   | Negative |
| P82187 | FLVVNILALTLPFLGAEVQN  | Negative |
| P82187 | NQEQPTCHKNDERFFDLKTV  | Negative |
| P82187 | SFFLVVNILALTLPFLGAEV  | Negative |
| P82187 | LGAEVQNNQEQPTCHKNDERF | Negative |
| P82187 | NILALTLPFLGAEVQNNQEQP | Negative |
| P82187 | LPFLGAEVQNNQEQPTCHKND | Negative |
| P82187 | MKSFFLVVNILALTLPFLGA  | Negative |
| P82187 | EQPTCHKNDERFFDLKTVKY  | Negative |
| P82187 | GAEVQNNQEQPTCHKNDERFF | Negative |
| P82187 | QPTCHKNDERFFDLKTVKYI  | Negative |
| P82187 | FLGAEVQNNQEQPTCHKNDER | Negative |
| P82187 | AEVQNNQEQPTCHKNDERFFD | Negative |
| P82187 | EVQNNQEQPTCHKNDERFFDL | Negative |
| P82187 | PTCHKNDERFFDLKTVKYIP  | Negative |
| P82187 | VNILALTLPFLGAEVQNNQEQ | Negative |

|        |                       |          |
|--------|-----------------------|----------|
| P82187 | VQNQEPTCHKNDERFFDLK   | Negative |
| P82187 | LTLPLGAEVQNQEPTCHK    | Negative |
| P82187 | CHKNDERFFDLKTVKYIPIY  | Negative |
| P82187 | TCHKNDERFFDLKTVKYIPI  | Negative |
| P82187 | PFLGAEVQNQEPTCHKNDE   | Negative |
| P82187 | QNQEPTCHKNDERFFDLKT   | Negative |
| P82187 | TLPLGAEVQNQEPTCHKN    | Negative |
| P82187 | VVNILALTPLPLGAEVQNQE  | Negative |
| P82187 | KSFFLVVNILALTPLPLGAE  | Negative |
| P82187 | QEPTCHKNDERFFDLKTVK   | Negative |
| P82187 | FFLVVNILALTPLPLGAEVQ  | Negative |
| P82187 | LALTPLPLGAEVQNQEPTC   | Negative |
| P82187 | ILALTPLPLGAEVQNQEPT   | Negative |
| P82187 | ALTPLPLGAEVQNQEPTCH   | Negative |
| P82290 | LCSQTEAGRLKKLGKKIEGA  | Negative |
| P82290 | MNFSKIFIFVVLAVLLCSQ   | Negative |
| P82290 | FSKIFIFVVLAVLLCSQTE   | Negative |
| P82290 | AGRLKKLGKKIEGAGKRVFK  | Negative |
| P82290 | FIFVVLAVLLCSQTEAGRL   | Negative |
| P82290 | NFSKIFIFVVLAVLLCSQT   | Negative |
| P82290 | VVLAVLLCSQTEAGRLKKL   | Negative |
| P82290 | LKKLGKKIEGAGKRVFKAAE  | Negative |
| P82290 | LAVLLCSQTEAGRLKKLGK   | Negative |
| P82290 | LLCSQTEAGRLKKLGKKIE   | Negative |
| P82290 | QTEAGRLKKLGKKIEGAGKR  | Negative |
| P82290 | KKLGKKIEGAGKRVFKAAEK  | Negative |
| P82290 | TEAGRLKKLGKKIEGAGKRV  | Negative |
| P82290 | VLLCSQTEAGRLKKLGKKI   | Negative |
| P82290 | LLCSQTEAGRLKKLGKKIEG  | Negative |
| P82290 | EAGRLKKLGKKIEGAGKRVF  | Negative |
| P82290 | IFIFVVLAVLLCSQTEAGR   | Negative |
| P82290 | AVLLCSQTEAGRLKKLGKK   | Negative |
| P82290 | SKIFIFVVLAVLLCSQTEA   | Negative |
| P82290 | GRLKKLGKKIEGAGKRVFKA  | Negative |
| P82290 | KLGGKKIEGAGKRVFKAAEKA | Negative |
| P82290 | CSQTEAGRLKKLGKKIEGAG  | Negative |
| P82290 | RLKKLGKKIEGAGKRVFKAA  | Negative |
| P82290 | SQTEAGRLKKLGKKIEGAGK  | Negative |
| P82290 | GKKIEGAGKRVFKAAEKALP  | Negative |
| P82290 | IFVVLAVLLCSQTEAGRLK   | Negative |
| P82290 | KIFIFVVLAVLLCSQTEAG   | Negative |
| P82290 | VLAVLLCSQTEAGRLKKLG   | Negative |
| P82290 | LGKKIEGAGKRVFKAAEKAL  | Negative |
| P82358 | RLFACLLAVLILVHESNAQ   | Negative |
| P82358 | LLAVLILVHESNAQCRRLC   | Negative |
| P82358 | RLCYKQRCVTYCRGRGKRSL  | Negative |

|        |                      |          |
|--------|----------------------|----------|
| P82358 | MNRTRLFACLLAVLILVHE  | Negative |
| P82358 | VLILVHESNAQCRRLCYKQR | Negative |
| P82358 | ESNAQCRRLCYKQRCVTYCR | Negative |
| P82358 | AVLILVHESNAQCRRLCYKQ | Negative |
| P82358 | RRLCYKQRCVTYCRGRGKRS | Negative |
| P82358 | CRRLCYKQRCVTYCRGRGKR | Negative |
| P82358 | QCRRLCYKQRCVTYCRGRGK | Negative |
| P82358 | YKQRCVTYCRGRGKRSLDET | Negative |
| P82358 | LCYKQRCVTYCRGRGKRSLD | Negative |
| P82358 | NAQCRRLCYKQRCVTYCRGR | Negative |
| P82358 | LLAVLILVHESNAQCRRLCY | Negative |
| P82358 | ACLLAVLILVHESNAQCRR  | Negative |
| P82358 | RTRLFACLLAVLILVHESN  | Negative |
| P82358 | NRTRLFACLLAVLILVHES  | Negative |
| P82358 | CYKQRCVTYCRGRGKRSLDE | Negative |
| P82358 | SNAQCRRLCYKQRCVTYCRG | Negative |
| P82358 | LFACLLAVLILVHESNAQC  | Negative |
| P82358 | FACLLAVLILVHESNAQCR  | Negative |
| P82358 | AQCRRLCYKQRCVTYCRGRG | Negative |
| P82358 | LVHESNAQCRRLCYKQRCVT | Negative |
| P82358 | LILVHESNAQCRRLCYKQRC | Negative |
| P82358 | LAVLILVHESNAQCRRLCYK | Negative |
| P82358 | HESNAQCRRLCYKQRCVTYC | Negative |
| P82358 | TRLFACLLAVLILVHESNA  | Negative |
| P82358 | ILVHESNAQCRRLCYKQRCV | Negative |
| P82358 | VHESNAQCRRLCYKQRCVTY | Negative |
| P82384 | ANEEADVVKSDSEVNLLDFN | Negative |
| P82384 | ADVVKSDSEVNLLDFNYAYE | Negative |
| P82384 | FVIVLACLLAVVFANEEADV | Negative |
| P82384 | MKFVIVLACLLAVVFANEEA | Negative |
| P82384 | ACLLAVVFANEEADVVKSDS | Negative |
| P82384 | EADVVKSDSEVNLLDFNYAY | Negative |
| P82384 | EVNLLDFNYAYELSNHIRAV | Negative |
| P82384 | VVFANEEADVVKSDSEVNLL | Negative |
| P82384 | SDSEVNLLDFNYAYELSNHI | Negative |
| P82384 | KSDSEVNLLDFNYAYELSNH | Negative |
| P82384 | VLACLLAVVFANEEADVVK  | Negative |
| P82384 | VKSDSEVNLLDFNYAYELSN | Negative |
| P82384 | VNLLDFNYAYELSNHIRAVQ | Negative |
| P82384 | LLAVVFANEEADVVKSDSEV | Negative |
| P82384 | EEADVVKSDSEVNLLDFNYA | Negative |
| P82384 | VIVLACLLAVVFANEEADV  | Negative |
| P82384 | NEEADVVKSDSEVNLLDFNY | Negative |
| P82384 | FANEEADVVKSDSEVNLLDF | Negative |
| P82384 | CLLAVVFANEEADVVKSDSE | Negative |
| P82384 | VVKSDSEVNLLDFNYAYELS | Negative |

|        |                       |          |
|--------|-----------------------|----------|
| P82384 | VFANEEADVVKSDSEVNLLD  | Negative |
| P82384 | AVVFANEEADVVKSDSEVNL  | Negative |
| P82384 | IVLACLLAVVFANEEADVVK  | Negative |
| P82384 | SEVNLLDFNYAYELSNHIRA  | Negative |
| P82384 | LACLLAVVFANEEADVVKSD  | Negative |
| P82384 | LAVVFANEEADVVKSDSEVN  | Negative |
| P82384 | DVVKSDSEVNLLDFNYAYEL  | Negative |
| P82384 | NLLDFNYAYELSNHIRAVQT  | Negative |
| P82384 | DSEVNLLDFNYAYELSNHIR  | Negative |
| P82592 | GQSEAGGLKKLGKKLEGAGK  | Negative |
| P82592 | MAVLLLTGQSEAGGLKKLGK  | Negative |
| P82592 | LLIAMAVLLLTGQSEAGGLK  | Negative |
| P82592 | GKKLEGAGKRVFNAAEKALP  | Negative |
| P82592 | LLTGQSEAGGLKKLGKKLEG  | Negative |
| P82592 | AMAVLLLTGQSEAGGLKKLG  | Negative |
| P82592 | LFLLIAMAVLLLTGQSEAGG  | Negative |
| P82592 | TGQSEAGGLKKLGKKLEGAG  | Negative |
| P82592 | GGLKKLGKKLEGAGKRVFNA  | Negative |
| P82592 | VLLLTGQSEAGGLKKLGKKL  | Negative |
| P82592 | IAMAVLLLTGQSEAGGLKKL  | Negative |
| P82592 | TKLFLLIAMAVLLLTGQSEA  | Negative |
| P82592 | SEAGGLKKLGKKLEGAGKRV  | Negative |
| P82592 | GLKKLGKKLEGAGKRVFNAA  | Negative |
| P82592 | AVLLLTGQSEAGGLKKLGKK  | Negative |
| P82592 | KLGGKKLEGAGKRVFNAAEKA | Negative |
| P82592 | EAGGLKKLGKKLEGAGKRVF  | Negative |
| P82592 | QSEAGGLKKLGKKLEGAGKR  | Negative |
| P82592 | KLFLLIAMAVLLLTGQSEAG  | Negative |
| P82592 | MNFTKLFLLIAMAVLLLTGQ  | Negative |
| P82592 | LLLTGQSEAGGLKKLGKKLE  | Negative |
| P82592 | AGGLKKLGKKLEGAGKRVFN  | Negative |
| P82592 | KKLGKKLEGAGKRVFNAAEK  | Negative |
| P82592 | LGKKLEGAGKRVFNAAEKAL  | Negative |
| P82592 | FTKLFLLIAMAVLLLTGQSE  | Negative |
| P82592 | FLLIAMAVLLLTGQSEAGGL  | Negative |
| P82592 | NFTKLFLLIAMAVLLLTGQS  | Negative |
| P82592 | LKKLGKKLEGAGKRVFNAAE  | Negative |
| P82592 | LTGQSEAGGLKKLGKKLEGA  | Negative |
| P82593 | TATAHAEDVTDYSITVDPAA  | Negative |
| P82593 | RWRYGTAATALLVAAGLVPT  | Negative |
| P82593 | LVPTATAHAEDVTDYSITVD  | Negative |
| P82593 | AEDVTDYSITVDPAAKGAAI  | Negative |
| P82593 | RIRWRYGTAATALLVAAGLV  | Negative |
| P82593 | ATAHAEDVTDYSITVDPAAK  | Negative |
| P82593 | TALLVAAGLVPTATAHAEDV  | Negative |
| P82593 | ALLVAAGLVPTATAHAEDVT  | Negative |

|        |                       |          |
|--------|-----------------------|----------|
| P82593 | IRWRYGTAATALLVAAGLVP  | Negative |
| P82593 | PTATAHAEDVTDYSITVDPA  | Negative |
| P82593 | VAAGLVPTATAHAEDVTDYS  | Negative |
| P82593 | AAGLVPTATAHAEDVTDYSI  | Negative |
| P82593 | AHAEDVTDYSITVDPAAKGA  | Negative |
| P82593 | HAEDVTDYSITVDPAAKGAA  | Negative |
| P82593 | LVAAGLVPTATAHAEDVTDY  | Negative |
| P82593 | AGLVPTATAHAEDVTDYSIT  | Negative |
| P82593 | SRIRWRYGTAATALLVAAGL  | Negative |
| P82593 | YGTAATALLVAAGLVPTATA  | Negative |
| P82593 | MSRIRWRYGTAATALLVAAG  | Negative |
| P82593 | RYGTAATALLVAAGLVPTAT  | Negative |
| P82593 | WRYGTAATALLVAAGLVPTA  | Negative |
| P82593 | ATALLVAAGLVPTATAHAED  | Negative |
| P82593 | GTAATALLVAAGLVPTATAH  | Negative |
| P82593 | AATALLVAAGLVPTATAHAE  | Negative |
| P82593 | TAATALLVAAGLVPTATAHA  | Negative |
| P82593 | GLVPTATAHAEDVTDYSITV  | Negative |
| P82593 | VPTATAHAEDVTDYSITVDP  | Negative |
| P82593 | TAHAEDVTDYSITVDPAAKG  | Negative |
| P82593 | EDVTDYSITVDPAAKGAAID  | Negative |
| P82594 | GAAAAGALTAVPGVAHAAPR  | Negative |
| P82594 | SRRLLLKGAAAAGALTAVPG  | Negative |
| P82594 | MCTREAVRMSREHDLPEIPS  | Negative |
| P82594 | EHDLP EIPSRRLLLKGAAA  | Negative |
| P82594 | MSREHDLPEIPSRRLLLKGA  | Negative |
| P82594 | REAVRMSREHDLPEIPSRRL  | Negative |
| P82594 | TREAVRMSREHDLPEIPSRR  | Negative |
| P82594 | LPEIPSRRLLLKGAAAAGAL  | Negative |
| P82594 | CTREAVRMSREHDLPEIPSR  | Negative |
| P82594 | PSRRLLLKGAAAAGALTAVP  | Negative |
| P82594 | EAVRMSREHDLPEIPSRRL   | Negative |
| P82594 | SREHDLPEIPSRRLLLKGAA  | Negative |
| P82594 | REHDLPEIPSRRLLLKGAAA  | Negative |
| P82594 | RRLLLKGAAAAGALTAVPGV  | Negative |
| P82594 | AAGALTAVPGVAHAAPRPAP  | Negative |
| P82594 | EIPSRRLLLKGAAAAGALTA  | Negative |
| P82594 | RLLLLKGAAAAGALTAVPGVA | Negative |
| P82594 | KGAAAAGALTAVPGVAHAAP  | Negative |
| P82594 | HDLPEIPSRRLLLKGAAAAG  | Negative |
| P82594 | LLKGAAAAGALTAVPGVAHA  | Negative |
| P82594 | RMSREHDLPEIPSRRLLLKG  | Negative |
| P82594 | LKGAAAAGALTAVPGVAHAA  | Negative |
| P82594 | AVRMSREHDLPEIPSRRLLL  | Negative |
| P82594 | AAAAGALTAVPGVAHAAPRP  | Negative |
| P82594 | VRMSREHDLPEIPSRRLLLK  | Negative |

|        |                       |          |
|--------|-----------------------|----------|
| P82594 | IPSRLLLLKGAAAAGALTAV  | Negative |
| P82594 | LLKGA AAAAGALTAVPGVAH | Negative |
| P82594 | DLPEIPSRLLLLKGAAAAGA  | Negative |
| P82594 | PEIPSRLLLLKGAAAAGALT  | Negative |
| P82662 | VMTIVCLDLGYTLICFISSH  | Negative |
| P82662 | CLDLGYTLICFISSHDSVTC  | Negative |
| P82662 | FISSHDSVTCAPGENVCFLK  | Negative |
| P82662 | LLTLVVMTIVCLDLGYTLIC  | Negative |
| P82662 | VCLDLGYTLICFISSHDSVT  | Negative |
| P82662 | TIVCLDLGYTLICFISSHDS  | Negative |
| P82662 | LDLGYTLICFISSHDSVTCA  | Negative |
| P82662 | LICFISSHDSVTCAPGENVC  | Negative |
| P82662 | DLGYTLICFISSHDSVTCAP  | Negative |
| P82662 | ICFISSHDSVTCAPGENVCF  | Negative |
| P82662 | MKTLLLTLVVMTIVCLDLGY  | Negative |
| P82662 | HDSVTCAPGENVCFLKSWCD  | Negative |
| P82662 | TLLLTLVVMTIVCLDLGYTL  | Negative |
| P82662 | YTLCIFISSHDSVTCAPGEN  | Negative |
| P82662 | LGYTLCIFISSHDSVTCAPG  | Negative |
| P82662 | LLLTLVVMTIVCLDLGYTLI  | Negative |
| P82662 | GYTLICFISSHDSVTCAPGE  | Negative |
| P82662 | SHDSVTCAPGENVCFLKSWC  | Negative |
| P82662 | KTLLLTLVVMTIVCLDLGYT  | Negative |
| P82662 | VVMTIVCLDLGYTLICFISS  | Negative |
| P82662 | CFISSHDSVTCAPGENVCFL  | Negative |
| P82662 | MTIVCLDLGYTLICFISSHD  | Negative |
| P82662 | ISSHDSVTCAPGENVCFLKS  | Negative |
| P82662 | DSVTCAPGENVCFLKSWCDA  | Negative |
| P82662 | LTLVVMTIVCLDLGYTLICF  | Negative |
| P82662 | TLICFISSHDSVTCAPGENV  | Negative |
| P82662 | IVCLDLGYTLICFISSHDSV  | Negative |
| P82662 | LVVMTIVCLDLGYTLICFIS  | Negative |
| P82662 | SSHDSVTCAPGENVCFLKSW  | Negative |
| P82683 | MNAVMDSRGAWVSCFLILGL  | Negative |
| P82683 | AETKFSYERLRLRVTHQTTG  | Negative |
| P82683 | VMDSRGAWVSCFLILGLVFG  | Negative |
| P82683 | RGAWVSCFLILGLVFGATVK  | Negative |
| P82683 | LVFGATVKAETKFSYERLRL  | Negative |
| P82683 | GATVKAETKFSYERLRLRV   | Negative |
| P82683 | ATVKAETKFSYERLRLRVTH  | Negative |
| P82683 | ILGLVFGATVKAETKFSYER  | Negative |
| P82683 | VSCFLILGLVFGATVKAETK  | Negative |
| P82683 | ETKFSYERLRLRVTHQTTGD  | Negative |
| P82683 | LGLVFGATVKAETKFSYERL  | Negative |
| P82683 | TKFSYERLRLRVTHQTTGDE  | Negative |
| P82683 | FGATVKAETKFSYERLRLRV  | Negative |

|        |                      |          |
|--------|----------------------|----------|
| P82683 | AVMDSRGAWVSCFLILGLVF | Negative |
| P82683 | VFGATVKAETKFSYERLRLR | Negative |
| P82683 | GAWVSCFLILGLVFGATVKA | Negative |
| P82683 | AWVSCFLILGLVFGATVKA  | Negative |
| P82683 | FLILGLVFGATVKAETKFSY | Negative |
| P82683 | LILGLVFGATVKAETKFSYE | Negative |
| P82683 | KAETKFSYERLRLRVTHQTT | Negative |
| P82683 | DSRGAWVSCFLILGLVFGAT | Negative |
| P82683 | WVSCFLILGLVFGATVKAET | Negative |
| P82683 | SRGAWVSCFLILGLVFGATV | Negative |
| P82683 | MDSRGAWVSCFLILGLVFGA | Negative |
| P82683 | NAVMDSRGAWVSCFLILGLV | Negative |
| P82683 | VKAETKFSYERLRLRVTHQT | Negative |
| P82683 | SCFLILGLVFGATVKAETKF | Negative |
| P82683 | TVKAETKFSYERLRLRVTHQ | Negative |
| P82683 | CFLILGLVFGATVKAETKFS | Negative |
| P82818 | IVAMSLVSCSTAAPAKIPIK | Negative |
| P82818 | MSLVSCSTAAPAKIPIKAIK | Negative |
| P82818 | KFFFVFIVAMSLVSCSTAAP | Negative |
| P82818 | IPIKAIKTVGKAVGKGLRAI | Negative |
| P82818 | KIPIKAIKTVGKAVGKGLRA | Negative |
| P82818 | KAIKTVGKAVGKGLRAINIA | Negative |
| P82818 | TAAPAKIPIKAIKTVGKAVG | Negative |
| P82818 | CSTAAPAKIPIKAIKTVGKA | Negative |
| P82818 | PAKIPIKAIKTVGKAVGKGL | Negative |
| P82818 | FVFIVAMSLVSCSTAAPAKI | Negative |
| P82818 | LKFFFVFIVAMSLVSCSTAA | Negative |
| P82818 | IKAIKTVGKAVGKGLRAINI | Negative |
| P82818 | PIKAIKTVGKAVGKGLRAIN | Negative |
| P82818 | APAKIPIKAIKTVGKAVGKG | Negative |
| P82818 | SLVSCSTAAPAKIPIKAIKT | Negative |
| P82818 | NILKFFFVFIVAMSLVSCST | Negative |
| P82818 | STAAPAKIPIKAIKTVGKAV | Negative |
| P82818 | VAMSLVSCSTAAPAKIPIKA | Negative |
| P82818 | FFVFIVAMSLVSCSTAAPAK | Negative |
| P82818 | AKIPIKAIKTVGKAVGKGLR | Negative |
| P82818 | FFFVFIVAMSLVSCSTAAPA | Negative |
| P82818 | ILKFFFVFIVAMSLVSCSTA | Negative |
| P82818 | MNILKFFFVFIVAMSLVSCS | Negative |
| P82818 | LVSCSTAAPAKIPIKAIKTV | Negative |
| P82818 | SCSTAAPAKIPIKAIKTVGK | Negative |
| P82818 | AMSLVSCSTAAPAKIPIKAI | Negative |
| P82818 | AAPAKIPIKAIKTVGKAVGK | Negative |
| P82818 | VFIVAMSLVSCSTAAPAKIP | Negative |
| P82818 | VSCSTAAPAKIPIKAIKTVG | Negative |
| P82900 | VTALMLALVVLAAAPGGARA | Negative |



|        |                       |          |
|--------|-----------------------|----------|
| P82900 | AACQASQLAVCASAILSGAK  | Negative |
| P82900 | LAAAPGGARAACQASQLAVC  | Negative |
| P82900 | GGARAACQASQLAVCASAIL  | Negative |
| P82900 | VLAAAPGGARAACQASQLAV  | Negative |
| P82900 | AAPGGARAACQASQLAVCAS  | Negative |
| P82900 | QVVTALMLALVVLAAAPGGA  | Negative |
| P82900 | MMKKQVVTALMLALVVLAAA  | Negative |
| P82900 | TALMLALVVLAAAPGGARAA  | Negative |
| P82900 | KQVVTALMLALVVLAAAPGG  | Negative |
| P82900 | ALMLALVVLAAAPGGARAAC  | Negative |
| P82900 | GARAACQASQLAVCASAILS  | Negative |
| P82900 | KKQVVTALMLALVVLAAAPG  | Negative |
| P82900 | PGGARAACQASQLAVCASAI  | Negative |
| P82900 | MKKQVVTALMLALVVLAAAP  | Negative |
| P82900 | AGMMKKQVVTALMLALVVLA  | Negative |
| P82900 | VVTALMLALVVLAAAPGGAR  | Negative |
| P82900 | MLALVVLAAAPGGARAACQA  | Negative |
| P82900 | LMLALVVLAAAPGGARAACQ  | Negative |
| P82900 | GMMKKQVVTALMLALVVLAA  | Negative |
| P82900 | AAAPGGARAACQASQLAVCA  | Negative |
| P82900 | ACQASQLAVCASAILSGAKP  | Negative |
| P82900 | VVLAAAPGGARAACQASQLA  | Negative |
| P82900 | APGGARAACQASQLAVCASA  | Negative |
| P82900 | ARACQASQLAVCASAILSG   | Negative |
| P82900 | LVVLAAAPGGARAACQASQL  | Negative |
| P82900 | RAACQASQLAVCASAILSGA  | Negative |
| P82900 | MAGMMKKQVVTALMLALVVL  | Negative |
| P82900 | ALVVLAAAPGGARAACQASQ  | Negative |
| P82943 | EEPAGNMRVCCFSSVTRKIP  | Negative |
| P82943 | TLAVLHSEANEEPAGNMRVC  | Negative |
| P82943 | VSLAALAFLLTLAVLHSEAN  | Negative |
| P82943 | EANEEPAGNMRVCCFSSVTR  | Negative |
| P82943 | RVSLAALAFLLTLAVLHSEA  | Negative |
| P82943 | NMRVCCFSSVTRKIPLSLVK  | Negative |
| P82943 | GNMRVCCFSSVTRKIPLSLV  | Negative |
| P82943 | LHSEANEEPAGNMRVCCFSS  | Negative |
| P82943 | SLAALAFLLTLAVLHSEANE  | Negative |
| P82943 | LAALAFLLTLAVLHSEANEE  | Negative |
| P82943 | AGNMRVCCFSSVTRKIPLSL  | Negative |
| P82943 | HSEANEEPAGNMRVCCFSSV  | Negative |
| P82943 | LTLAVLHSEANEEPAGNMRV  | Negative |
| P82943 | FLLTLAVLHSEANEEPAGNM  | Negative |
| P82943 | AFLLTALAVLHSEANEEPAGN | Negative |
| P82943 | ANEPAAGNMRVCCFSSVTRK  | Negative |
| P82943 | EPAGNMRVCCFSSVTRKIPL  | Negative |
| P82943 | PAGNMRVCCFSSVTRKIPLS  | Negative |

|        |                       |          |
|--------|-----------------------|----------|
| P82943 | AVLHSEANEEPAGNMRVCCF  | Negative |
| P82943 | LLTLAVLHSEANEEPAGNMR  | Negative |
| P82943 | MRVSLAALAFLLTLAVLHSE  | Negative |
| P82943 | RVCCFSSVTRKIPLSLVKNY  | Negative |
| P82943 | LAFLLLTLAVLHSEANEEPAG | Negative |
| P82943 | VLHSEANEEPAGNMRVCCFS  | Negative |
| P82943 | SEANEEPAGNMRVCCFSSVT  | Negative |
| P82943 | LAVLHSEANEEPAGNMRVCC  | Negative |
| P82943 | AALAFLLTLAVLHSEANEEP  | Negative |
| P82943 | NEEPAGNMRVCCFSSVTRKI  | Negative |
| P82943 | MRVCCFSSVTRKIPLSLVKN  | Negative |
| P83234 | LASPPGNWQKADVTFDSNTA  | Negative |
| P83234 | WQKADVTFDSNTAFESLVVS  | Negative |
| P83234 | DVTFDSNTAFESLVVSPDKK  | Negative |
| P83234 | ASPPGNWQKADVTFDSNTAF  | Negative |
| P83234 | FTLCFFADQENGKGKALASPP | Negative |
| P83234 | LFTLCFFADQENGKGKALASP | Negative |
| P83234 | TLCFFADQENGKGKALASPPG | Negative |
| P83234 | ALASPPGNWQKADVTFDSNT  | Negative |
| P83234 | FFADQENGKGKALASPPGNWQ | Negative |
| P83234 | LLFTLCFFADQENGKGKALAS | Negative |
| P83234 | GKALASPPGNWQKADVTFDS  | Negative |
| P83234 | MLLFTLCFFADQENGKGKALA | Negative |
| P83234 | KADVTFDSNTAFESLVVSPD  | Negative |
| P83234 | ENGKGKALASPPGNWQKADVT | Negative |
| P83234 | PPGNWQKADVTFDSNTAFES  | Negative |
| P83234 | SPPGNWQKADVTFDSNTAFE  | Negative |
| P83234 | QKADVTFDSNTAFESLVVSP  | Negative |
| P83234 | CFFADQENGKGKALASPPGNW | Negative |
| P83234 | PGNWQKADVTFDSNTAFESL  | Negative |
| P83234 | KALASPPGNWQKADVTFDSN  | Negative |
| P83234 | NGKGKALASPPGNWQKADVTF | Negative |
| P83234 | GGKALASPPGNWQKADVTFD  | Negative |
| P83234 | DQENGKGKALASPPGNWQKAD | Negative |
| P83234 | ADVTFDSNTAFESLVVSPDK  | Negative |
| P83234 | NWQKADVTFDSNTAFESLVV  | Negative |
| P83234 | GNWQKADVTFDSNTAFESLV  | Negative |
| P83234 | FADQENGKGKALASPPGNWQK | Negative |
| P83234 | QENGKGKALASPPGNWQKADV | Negative |
| P83234 | ADQENGKGKALASPPGNWQKA | Negative |
| P83313 | VMQPSEGKGVWDWIKSTAKK  | Negative |
| P83313 | EGKGVWDWIKSTAKKLWNSE  | Negative |
| P83313 | LLFVTLMTMLVMQPSEGK    | Negative |
| P83313 | RKLLFVTLMTMLVMQPSEG   | Negative |
| P83313 | KVWDWIKSTAKKLWNSEPVK  | Negative |
| P83313 | QPSEGKGVWDWIKSTAKKLW  | Negative |

|        |                      |          |
|--------|----------------------|----------|
| P83313 | TMLVMQPSEGGKVWDWIKST | Negative |
| P83313 | KSTAKKLWNSEPVKELKNTA | Negative |
| P83313 | MQPSEGGKVWDWIKSTAKKL | Negative |
| P83313 | LVMQPSEGGKVWDWIKSTAK | Negative |
| P83313 | PSEGGKVWDWIKSTAKKLWN | Negative |
| P83313 | NRKLLFVTLMVTMLVMQPSE | Negative |
| P83313 | LFVTLMVTMLVMQPSEGGKV | Negative |
| P83313 | WIKSTAKKLWNSEPVKELKN | Negative |
| P83313 | VWDWIKSTAKKLWNSEPVKE | Negative |
| P83313 | MNRKLLFVTLMVTMLVMQPS | Negative |
| P83313 | WDWIKSTAKKLWNSEPVKEL | Negative |
| P83313 | DWIKSTAKKLWNSEPVKELK | Negative |
| P83313 | KLLFVTLMVTMLVMQPSEGG | Negative |
| P83313 | MLVMQPSEGGKVWDWIKSTA | Negative |
| P83313 | GGKVWDWIKSTAKKLWNSEP | Negative |
| P83313 | SEGGKVWDWIKSTAKKLWNS | Negative |
| P83313 | VTMLVMQPSEGGKVWDWIKS | Negative |
| P83313 | TLMVTMLVMQPSEGGKVWDW | Negative |
| P83313 | MVTMLVMQPSEGGKVWDWIK | Negative |
| P83313 | GKVWDWIKSTAKKLWNSEPV | Negative |
| P83313 | FVTLMVTMLVMQPSEGGKVW | Negative |
| P83313 | IKSTAKKLWNSEPVKELKNT | Negative |
| P83313 | LMVTMLVMQPSEGGKVWDWI | Negative |
| P83326 | SLLLVLFIPLSQRPVKA    | Negative |
| P83326 | MAFSYCSSLFVSLLLVILF  | Negative |
| P83326 | SSLFVSLLLVILFIPLSQR  | Negative |
| P83326 | LLVILFIPLSQRPVKAEN   | Negative |
| P83326 | PLSQRPVKAENHLISEICP  | Negative |
| P83326 | VILFIPLSQRPVKAENHL   | Negative |
| P83326 | LSQRPVKAENHLISEICPK  | Negative |
| P83326 | FISPLSQRPVKAENHLISE  | Negative |
| P83326 | VKAENHLISEICPKTRNPSL | Negative |
| P83326 | LFISPLSQRPVKAENHLIS  | Negative |
| P83326 | SYCSSSLFVSLLLVILFISP | Negative |
| P83326 | SLFVSLLLVILFIPLSQRP  | Negative |
| P83326 | CSSSLFVSLLLVILFIPLS  | Negative |
| P83326 | AFSYCSSSLFVSLLLVILFI | Negative |
| P83326 | LLLVLFIPLSQRPVKAEN   | Negative |
| P83326 | RPSVKAENHLISEICPKTRN | Negative |
| P83326 | SPLSQRPVKAENHLISEIC  | Negative |
| P83326 | YCSSLFVSLLLVILFISPL  | Negative |
| P83326 | VSLLLVILFIPLSQRPVKA  | Negative |
| P83326 | ISPLSQRPVKAENHLISEI  | Negative |
| P83326 | QRPSVKAENHLISEICPKTR | Negative |
| P83326 | SQRPVKAENHLISEICPKT  | Negative |
| P83326 | PSVKAENHLISEICPKTRNP | Negative |

|        |                      |          |
|--------|----------------------|----------|
| P83326 | LVILFISPLSQRPSVKAENH | Negative |
| P83326 | FVSLLLVILFISPLSQRPSV | Negative |
| P83326 | LFVSLLLVILFISPLSQRPS | Negative |
| P83326 | SSSLFVSLLLVILFISPLSQ | Negative |
| P83326 | SVKAENHLISEICPKTRNPS | Negative |
| P83326 | FSYCSSLFVSLLLVILFIS  | Negative |
| P83371 | TLLAVVLIATQSSATRTTRR | Negative |
| P83371 | LAVVLIATQSSATRTTRRPK | Negative |
| P83371 | LAILTTLLAVVLIATQSSAT | Negative |
| P83371 | SATRTTRRPKPQNTKKPPRG | Negative |
| P83371 | TQSSATRTTRRPKPQNTKKP | Negative |
| P83371 | VLIATQSSATRTTRRPKPQN | Negative |
| P83371 | AILTTLLAVVLIATQSSATR | Negative |
| P83371 | VVLIATQSSATRTTRRPKPQ | Negative |
| P83371 | LTLLAVVLIATQSSATRTT  | Negative |
| P83371 | LIATQSSATRTTRRPKPQNT | Negative |
| P83371 | LLAILTTLLAVVLIATQSSA | Negative |
| P83371 | IATQSSATRTTRRPKPQNTK | Negative |
| P83371 | AVVLIATQSSATRTTRRPKP | Negative |
| P83371 | PSLRLLAILTTLLAVVLIAT | Negative |
| P83371 | TTRRPKPQNTKKPPRGGGTG | Negative |
| P83371 | RRPKPQNTKKPPRGGGTGGG | Negative |
| P83371 | RLLAILTTLLAVVLIATQSS | Negative |
| P83371 | LLAVVLIATQSSATRTTRRP | Negative |
| P83371 | ATQSSATRTTRRPKPQNTKK | Negative |
| P83371 | SSATRTTRRPKPQNTKKPPR | Negative |
| P83371 | LRLAILTTLLAVVLIATQS  | Negative |
| P83371 | RTTRRPKPQNTKKPPRGGGT | Negative |
| P83371 | ILTTLLAVVLIATQSSATRT | Negative |
| P83371 | ATRTTRRPKPQNTKKPPRGG | Negative |
| P83371 | TRTTRRPKPQNTKKPPRGGG | Negative |
| P83371 | TRRPKPQNTKKPPRGGGTGG | Negative |
| P83371 | MPSLRLLAILTTLLAVVLIA | Negative |
| P83371 | SLRLLAILTTLLAVVLIATQ | Negative |
| P83371 | QSSATRTTRRPKPQNTKKPP | Negative |
| P83400 | IATHSEARCPPCFTTNPNME | Negative |
| P83400 | SEARCPPCFTTNPNMEADCR | Negative |
| P83400 | YGILIAFFLTVMIATHSEA  | Negative |
| P83400 | AFFLTVMIATHSEARCPPCF | Negative |
| P83400 | MKFLYGTILIAFFLTVMIAT | Negative |
| P83400 | TILIAFFLTVMIATHSEARC | Negative |
| P83400 | GTILIAFFLTVMIATHSEAR | Negative |
| P83400 | LTVMIATHSEARCPPCFTTN | Negative |
| P83400 | FFLTVMIATHSEARCPPCFT | Negative |
| P83400 | FTTNPNMEADCRKCCGGRGY | Negative |
| P83400 | TVMIATHSEARCPPCFTTNP | Negative |

|        |                      |          |
|--------|----------------------|----------|
| P83400 | RCPPCFTTNPNMEADCRKCC | Negative |
| P83400 | ARCPPCFTTNPNMEADCRKC | Negative |
| P83400 | THSEARCPPCFTTNPNMEAD | Negative |
| P83400 | EARCPPCFTTNPNMEADCRK | Negative |
| P83400 | VMIATHSEARCPPCFTTNPN | Negative |
| P83400 | PPCFTTNPNMEADCRKCCGG | Negative |
| P83400 | FLYGTILIAFFLTVMIATHS | Negative |
| P83400 | FLTVMIATHSEARCPPCFTT | Negative |
| P83400 | KFLYGTILIAFFLTVMIATH | Negative |
| P83400 | ATHSEARCPPCFTTNPNMEA | Negative |
| P83400 | ILIAFFLTVMIATHSEARCP | Negative |
| P83400 | CPPCFTTNPNMEADCRKCCG | Negative |
| P83400 | CFTTNPNMEADCRKCCGGRG | Negative |
| P83400 | LYGTILIAFFLTVMIATHSE | Negative |
| P83400 | MIATHSEARCPPCFTTNPNM | Negative |
| P83400 | LIAFFLTVMIATHSEARCPP | Negative |
| P83400 | PCFTTNPNMEADCRKCCGGR | Negative |
| P83400 | HSEARCPPCFTTNPNMEADC | Negative |
| P83403 | SVSQSEAGWLKKIGKKIERV | Negative |
| P83403 | IFVFIALILALSVSQSEAGW | Negative |
| P83403 | KIFVFIALILALSVSQSEAG | Negative |
| P83403 | WLKKIGKKIERVGQNTRDAT | Negative |
| P83403 | SQSEAGWLKKIGKKIERVGQ | Negative |
| P83403 | IGKKIERVGQNTRDATVKGL | Negative |
| P83403 | AGWLKKIGKKIERVGQNTRD | Negative |
| P83403 | FVFIALILALSVSQSEAGWL | Negative |
| P83403 | LALSVSQSEAGWLKKIGKKI | Negative |
| P83403 | NFYKIFVFIALILALSVSQS | Negative |
| P83403 | MNFYKIFVFIALILALSVSQ | Negative |
| P83403 | ILALSVSQSEAGWLKKIGKK | Negative |
| P83403 | GWLKKIGKKIERVGQNTRDA | Negative |
| P83403 | GKKIERVGQNTRDATVKGLE | Negative |
| P83403 | QSEAGWLKKIGKKIERVGQN | Negative |
| P83403 | YKIFVFIALILALSVSQSEA | Negative |
| P83403 | ALSVSQSEAGWLKKIGKKIE | Negative |
| P83403 | VFIALILALSVSQSEAGWLK | Negative |
| P83403 | KKIGKKIERVGQNTRDATVK | Negative |
| P83403 | ALILALSVSQSEAGWLKKIG | Negative |
| P83403 | SEAGWLKKIGKKIERVGQNT | Negative |
| P83403 | EAGWLKKIGKKIERVGQNTR | Negative |
| P83403 | LKKIGKKIERVGQNTRDATV | Negative |
| P83403 | IALILALSVSQSEAGWLKKI | Negative |
| P83403 | VSQSEAGWLKKIGKKIERVG | Negative |
| P83403 | KIGKKIERVGQNTRDATVKG | Negative |
| P83403 | LILALSVSQSEAGWLKKIGK | Negative |
| P83403 | FYKIFVFIALILALSVSQSE | Negative |

|        |                      |          |
|--------|----------------------|----------|
| P83403 | LSVSQSEAGWLKKIGKKIER | Negative |
| P83472 | IVALLALAFLCADISAVKTS | Negative |
| P83472 | VKTSWPELVGETLEEAKAQI | Negative |
| P83472 | FLCADISAVKTSWPELVGET | Negative |
| P83472 | WPELVGETLEEAKAQILEDR | Negative |
| P83472 | FAIVALLALAFLCADISAVK | Negative |
| P83472 | DISAVKTSWPELVGETLEEA | Negative |
| P83472 | TSWPELVGETLEEAKAQILE | Negative |
| P83472 | ALAFLCADISAVKTSWPELV | Negative |
| P83472 | AFLCADISAVKTSWPELVGE | Negative |
| P83472 | SAVKTSWPELVGETLEEAKA | Negative |
| P83472 | ADISAVKTSWPELVGETLEE | Negative |
| P83472 | PELVGETLEEAKAQILEDRP | Negative |
| P83472 | KTSWPELVGETLEEAKAQIL | Negative |
| P83472 | ALLALAFLCADISAVKTSWP | Negative |
| P83472 | LVGETLEEAKAQILEDRPDA | Negative |
| P83472 | MKLLFAIVALLALAFLCADI | Negative |
| P83472 | LCADISAVKTSWPELVGETL | Negative |
| P83472 | ELVGETLEEAKAQILEDRPD | Negative |
| P83472 | ISAVKTSWPELVGETLEEAK | Negative |
| P83472 | LFAIVALLALAFLCADISAV | Negative |
| P83472 | AIVALLALAFLCADISAVKT | Negative |
| P83472 | LAFLCADISAVKTSWPELVG | Negative |
| P83472 | KLLFAIVALLALAFLCADIS | Negative |
| P83472 | CADISAVKTSWPELVGETLE | Negative |
| P83472 | SWPELVGETLEEAKAQILED | Negative |
| P83472 | AVKTSWPELVGETLEEAKAQ | Negative |
| P83472 | LALAFLCADISAVKTSWPEL | Negative |
| P83472 | LLALAFLCADISAVKTSWPE | Negative |
| P83472 | LLFAIVALLALAFLCADISA | Negative |
| P83519 | KGNNCPQDWLPMNGLCYKIF | Negative |
| P83519 | FLFVASSACWFVFLSLSGAK | Negative |
| P83519 | GNNCPQDWLPMNGLCYKIFN | Negative |
| P83519 | WFVFLSLSGAKGNNCPQDWL | Negative |
| P83519 | DWLPMNGLCYKIFNELKAWK | Negative |
| P83519 | NCPQDWLPMNGLCYKIFNEL | Negative |
| P83519 | ASSACWFVFLSLSGAKGNNC | Negative |
| P83519 | SGAKGNNCPQDWLPMNGLCY | Negative |
| P83519 | LSGAKGNNCPQDWLPMNGLC | Negative |
| P83519 | SSACWFVFLSLSGAKGNNCP | Negative |
| P83519 | ACWFVFLSLSGAKGNNCPQD | Negative |
| P83519 | RFLFVASSACWFVFLSLSGA | Negative |
| P83519 | PQDWLPMNGLCYKIFNELKA | Negative |
| P83519 | SLSGAKGNNCPQDWLPMNGL | Negative |
| P83519 | AKGNNCPQDWLPMNGLCYKI | Negative |
| P83519 | FVFLSLSGAKGNNCPQDWLP | Negative |

|        |                       |          |
|--------|-----------------------|----------|
| P83519 | NNCPQDWLPMNGLCYKIFNE  | Negative |
| P83519 | LFVASSACWFVFLSLSGAKG  | Negative |
| P83519 | GRFLFVASSACWFVFLSLSG  | Negative |
| P83519 | GAKGNNPCQDWLPMNGLCYK  | Negative |
| P83519 | QDWLPMNGLCYKIFNELKAW  | Negative |
| P83519 | FVASSACWFVFLSLSGAKGN  | Negative |
| P83519 | CPQDWLPMNGLCYKIFNELK  | Negative |
| P83519 | FLSLSGAKGNNPCQDWLPMN  | Negative |
| P83519 | VFLSLSGAKGNNPCQDWLPM  | Negative |
| P83519 | MGRFLFVASSACWFVFLSLS  | Negative |
| P83519 | VASSACWFVFLSLSGAKGNN  | Negative |
| P83519 | LSLSGAKGNNPCQDWLPMNG  | Negative |
| P83519 | CWFVFLSLSGAKGNNPCQDW  | Negative |
| P83544 | LILGSLVGAGATASATPAPA  | Negative |
| P83544 | MRYITGGIALGSALILGSLV  | Negative |
| P83544 | ATPAPAPAAQQSLYAPSALV  | Negative |
| P83544 | TASATPAPAPAAQQSLYAPS  | Negative |
| P83544 | GATASATPAPAPAAQQSLYA  | Negative |
| P83544 | ALILGSLVGAGATASATPAP  | Negative |
| P83544 | LGSALILGSLVGAGATASAT  | Negative |
| P83544 | TPAPAPAAQQSLYAPSALVL  | Negative |
| P83544 | VGAGATASATPAPAPAAQQS  | Negative |
| P83544 | ASATPAPAPAAQQSLYAPSA  | Negative |
| P83544 | AGATASATPAPAPAAQQSLY  | Negative |
| P83544 | PAPAPAAQQSLYAPSALVLT  | Negative |
| P83544 | SATPAPAPAAQQSLYAPSAL  | Negative |
| P83544 | GSALILGSLVGAGATASATP  | Negative |
| P83544 | LGSLVGAGATASATPAPAPA  | Negative |
| P83544 | GGIALGSALILGSLVGAGAT  | Negative |
| P83544 | YITGGIALGSALILGSLVGA  | Negative |
| P83544 | SALILGSLVGAGATASATPA  | Negative |
| P83544 | IALGSALILGSLVGAGATAS  | Negative |
| P83544 | ALGSALILGSLVGAGATASA  | Negative |
| P83544 | SLVGAGATASATPAPAPAAQ  | Negative |
| P83544 | RYITGGIALGSALILGSLVG  | Negative |
| P83544 | ILGSLVGAGATASATPAPAP  | Negative |
| P83544 | ITGGIALGSALILGSLVGAG  | Negative |
| P83544 | GSLVGAGATASATPAPAPAA  | Negative |
| P83544 | GAGATASATPAPAPAAQQL   | Negative |
| P83544 | TGGIALGSALILGSLVGAGA  | Negative |
| P83544 | GIALGSALILGSLVGAGATA  | Negative |
| P83544 | LVGAGATASATPAPAPAAQQ  | Negative |
| P83618 | WGGNARSDYPWAMFALRLQW  | Negative |
| P83618 | MRAIYIISVIIIVSLSIFSWG | Negative |
| P83618 | SLSIFSWGGNARSDYPWAMF  | Negative |
| P83618 | RSDYPWAMFALRLQWPAGFC  | Negative |

|        |                      |          |
|--------|----------------------|----------|
| P83618 | DYPWAMFALRLQWPAGFCEV | Negative |
| P83618 | RAIYIISVIIVSLSIFSWG  | Negative |
| P83618 | GGNARSDYPWAMFALRLQWP | Negative |
| P83618 | YIISVIIVSLSIFSWG     | Negative |
| P83618 | WAMFALRLQWPAGFCEV    | Negative |
| P83618 | FSWGGNARSDYPWAMFALRL | Negative |
| P83618 | IFSWG                | Negative |
| P83618 | AIYIISVIIVSLSIFSWG   | Negative |
| P83618 | SIFSWG               | Negative |
| P83618 | IVSLSIFSWG           | Negative |
| P83618 | VSLSIFSWG            | Negative |
| P83618 | ARSDYPWAMFALRLQWPAGF | Negative |
| P83618 | YPWAMFALRLQWPAGFCEV  | Negative |
| P83618 | SVIIVSLSIFSWG        | Negative |
| P83618 | SDYPWAMFALRLQWPAGFCE | Negative |
| P83618 | ISVIIVSLSIFSWG       | Negative |
| P83618 | GNARSDYPWAMFALRLQWPA | Negative |
| P83618 | SWG                  | Negative |
| P83618 | IIVSLSIFSWG          | Negative |
| P83618 | NARSDYPWAMFALRLQWPAG | Negative |
| P83618 | PWAMFALRLQWPAGFCEV   | Negative |
| P83618 | AMFALRLQWPAGFCEV     | Negative |
| P83618 | LSIFSWG              | Negative |
| P83618 | IISVIIVSLSIFSWG      | Negative |
| P83618 | IYIISVIIVSLSIFSWG    | Negative |
| P83632 | IVTILAVGVLCD         | Negative |
| P83632 | IATAVNEQTTQQIRDTLKAQ | Negative |
| P83632 | IIVTILAVGVLCD        | Negative |
| P83632 | AVGVLCD              | Negative |
| P83632 | KLIIVTILAVGVLCD      | Negative |
| P83632 | ATAVNEQTTQQIRDTLKAQC | Negative |
| P83632 | VLCDDIATAVNEQTTQQIRD | Negative |
| P83632 | EQTTQQIRDTLKAQCKKNGA | Negative |
| P83632 | LCDDIATAVNEQTTQQIRDT | Negative |
| P83632 | VGVLCDDIATAVNEQTTQQI | Negative |
| P83632 | VNEQTTQQIRDTLKAQCKKN | Negative |
| P83632 | MMWKLIIVTILAVGVLCD   | Negative |
| P83632 | TQQIRDTLKAQCKKNGAEDK | Negative |
| P83632 | QTTQQIRDTLKAQCKKNGAE | Negative |
| P83632 | VTILAVGVLCD          | Negative |
| P83632 | GVLCDDIATAVNEQTTQQIR | Negative |
| P83632 | LIIVTILAVGVLCD       | Negative |
| P83632 | ILAVGVLCD            | Negative |
| P83632 | DDIATAVNEQTTQQIRDTLK | Negative |
| P83632 | QQIRDTLKAQCKKNGAEDKA | Negative |
| P83632 | NEQTTQQIRDTLKAQCKKNG | Negative |



|        |                         |          |
|--------|-------------------------|----------|
| P83632 | MWKLIIVTILAVGVLCD DIA   | Negative |
| P83632 | CDDIATAVNEQTTQQIRD TL   | Negative |
| P83632 | TAVNEQTTQQIRD TLKAQCK   | Negative |
| P83632 | TILAVGVLCD DIAVNEQT     | Negative |
| P83632 | DIATAVNEQTTQQIRD TLKA   | Negative |
| P83632 | AVNEQTTQQIRD TLKAQCKK   | Negative |
| P83632 | TTQQIRD TLKAQCKKNGAED   | Negative |
| P83632 | LAVGVLCD DIAVNEQTTQ     | Negative |
| P83636 | QVAQCFTVRRVWL VVVVGLL   | Negative |
| P83636 | VWL VVVVGLL VHQT TARYVF | Negative |
| P83636 | MVNQVAQCFTVRRVWL VVVV   | Negative |
| P83636 | TVRRVWL VVVVGLL VHQT TA | Negative |
| P83636 | VVVVGLL VHQT TARYVFEEC  | Negative |
| P83636 | AQCFTVRRVWL VVVVGLL VH  | Negative |
| P83636 | QCFTVRRVWL VVVVGLL VHQ  | Negative |
| P83636 | TARYVFEECPGVMGNRALHG    | Negative |
| P83636 | HQT TARYVFEECPGVMGNRA   | Negative |
| P83636 | VNQVAQCFTVRRVWL VVVVG   | Negative |
| P83636 | VHQT TARYVFEECPGVMGNR   | Negative |
| P83636 | FTVRRVWL VVVVGLL VHQT T | Negative |
| P83636 | TTARYVFEECPGVMGNRALH    | Negative |
| P83636 | ARYVFEECPGVMGNRALHGK    | Negative |
| P83636 | LLVHQT TARYVFEECPGVMG   | Negative |
| P83636 | VAQCFTVRRVWL VVVVGLLV   | Negative |
| P83636 | VGLL VHQT TARYVFEECPGV  | Negative |
| P83636 | NQVAQCFTVRRVWL VVVVGL   | Negative |
| P83636 | VVGLL VHQT TARYVFEECPG  | Negative |
| P83636 | RYVFEECPGVMGNRALHGKV    | Negative |
| P83636 | GLLVHQT TARYVFEECPGVM   | Negative |
| P83636 | QT TARYVFEECPGVMGNRAL   | Negative |
| P83636 | VRRVWL VVVVGLL VHQT TAR | Negative |
| P83636 | LVVVVGLL VHQT TARYVFEE  | Negative |
| P83636 | CFTVRRVWL VVVVGLL VHQT  | Negative |
| P83636 | RVWL VVVVGLL VHQT TARYV | Negative |
| P83636 | LVHQT TARYVFEECPGVMGN   | Negative |
| P83636 | VVVGLL VHQT TARYVFEECP  | Negative |
| P83636 | RRVWL VVVVGLL VHQT TARY | Negative |
| P83673 | GRCQHDSITCSGRYRTGLCS    | Negative |
| P83673 | DAPCLRAGGRCQHDSITCSG    | Negative |
| P83673 | VVFATAVCTYGS DAPCLRAG   | Negative |
| P83673 | VCTYGS DAPCLRAGGRCQHD   | Negative |
| P83673 | YGSDAPCLRAGGRCQHDSIT    | Negative |
| P83673 | TYGS DAPCLRAGGRCQHDSI   | Negative |
| P83673 | CLRAGGRCQHDSITCSGRYR    | Negative |
| P83673 | PCLRAGGRCQHDSITCSGRY    | Negative |
| P83673 | MNGLILFCAVVFATAVCTYG    | Negative |

|        |                      |          |
|--------|----------------------|----------|
| P83673 | LILFCAVVFATAVCTYGSDA | Negative |
| P83673 | CTYGSDAPCLRAGGRCQHDS | Negative |
| P83673 | RAGGRCQHDSITCSGRYRTG | Negative |
| P83673 | VFATAVCTYGSDAPCLRAGG | Negative |
| P83673 | CAVVFATAVCTYGSDAPCLR | Negative |
| P83673 | ILFCAVVFATAVCTYGSDAP | Negative |
| P83673 | LRAGGRCQHDSITCSGRYRT | Negative |
| P83673 | NGLILFCAVVFATAVCTYGS | Negative |
| P83673 | APCLRAGGRCQHDSITCSGR | Negative |
| P83673 | AVCTYGSDAPCLRAGGRCQH | Negative |
| P83673 | FCAVVFATAVCTYGSDAPCL | Negative |
| P83673 | SDAPCLRAGGRCQHDSITCS | Negative |
| P83673 | GLILFCAVVFATAVCTYGSD | Negative |
| P83673 | ATAVCTYGSDAPCLRAGGRC | Negative |
| P83673 | TAVCTYGSDAPCLRAGGRCQ | Negative |
| P83673 | AVVFATAVCTYGSDAPCLRA | Negative |
| P83673 | AGGRCQHDSITCSGRYRTGL | Negative |
| P83673 | GGRCQHDSITCSGRYRTGLC | Negative |
| P83673 | GSDAPCLRAGGRCQHDSITC | Negative |
| P83673 | FATAVCTYGSDAPCLRAGGR | Negative |
| P83880 | YVMFVLVCLFLAMAQPSQAS | Negative |
| P83880 | PSQASYFSAWAGPGCNNHNA | Negative |
| P83880 | TKRLAYVMFVLVCLFLAMAQ | Negative |
| P83880 | CLFLAMAQPSQASYFSAWAG | Negative |
| P83880 | AYVMFVLVCLFLAMAQPSQA | Negative |
| P83880 | LFLAMAQPSQASYFSAWAGP | Negative |
| P83880 | VCLFLAMAQPSQASYFSAWA | Negative |
| P83880 | AQPSQASYFSAWAGPGCNNH | Negative |
| P83880 | SAWAGPGCNNHNARYSKCGC | Negative |
| P83880 | FLAMAQPSQASYFSAWAGPG | Negative |
| P83880 | SYFSAWAGPGCNNHNARYSK | Negative |
| P83880 | VMFVLVCLFLAMAQPSQASY | Negative |
| P83880 | LAYVMFVLVCLFLAMAQPSQ | Negative |
| P83880 | QPSQASYFSAWAGPGCNNHN | Negative |
| P83880 | YFSAWAGPGCNNHNARYSKC | Negative |
| P83880 | MFVLVCLFLAMAQPSQASYF | Negative |
| P83880 | SQASYFSAWAGPGCNNHNAR | Negative |
| P83880 | FVLVCLFLAMAQPSQASYFS | Negative |
| P83880 | RLAYVMFVLVCLFLAMAQPS | Negative |
| P83880 | QASYFSAWAGPGCNNHNARY | Negative |
| P83880 | AMAQPSQASYFSAWAGPGCN | Negative |
| P83880 | LVCLFLAMAQPSQASYFSAW | Negative |
| P83880 | METKRLAYVMFVLVCLFLAM | Negative |
| P83880 | ASYFSAWAGPGCNNHNARYS | Negative |
| P83880 | KRLAYVMFVLVCLFLAMAQP | Negative |
| P83880 | LAMAQPSQASYFSAWAGPGC | Negative |

|        |                       |          |
|--------|-----------------------|----------|
| P83880 | MAQPSQASYFSAWAGPGCNN  | Negative |
| P83880 | ETKRLAYVMFVLVCLFLAMA  | Negative |
| P83880 | FSAWAGPGCNNHNNARYSKCG | Negative |
| P83886 | MARNVLTNGEGLYAGQSLDV  | Negative |
| P83886 | VAAILTILASTCMARNVLTN  | Negative |
| P83886 | MMRIATVAAILTILASTCMA  | Negative |
| P83886 | PKAMMRIATVAAILTILAST  | Negative |
| P83886 | LASTCMARNVLTNGEGLYAG  | Negative |
| P83886 | TCMARNVLTNGEGLYAGQSL  | Negative |
| P83886 | ASTCMARNVLTNGEGLYAGQ  | Negative |
| P83886 | SSPKAMMRIATVAAILTILA  | Negative |
| P83886 | TILASTCMARNVLTNGEGLY  | Negative |
| P83886 | ILASTCMARNVLTNGEGLYA  | Negative |
| P83886 | STCMARNVLTNGEGLYAGQS  | Negative |
| P83886 | AILTILASTCMARNVLTNGE  | Negative |
| P83886 | IATVAAILTILASTCMARNV  | Negative |
| P83886 | MGRTTSSPKAMMRIATVAAI  | Negative |
| P83886 | ARNVLTNGEGLYAGQSLDVE  | Negative |
| P83886 | KAMMRIATVAAILTILASTC  | Negative |
| P83886 | RIATVAAILTILASTCMARN  | Negative |
| P83886 | RTTSSPKAMMRIATVAAILT  | Negative |
| P83886 | TSSPKAMMRIATVAAILTIL  | Negative |
| P83886 | ATVAAILTILASTCMARNVL  | Negative |
| P83886 | ILTILASTCMARNVLTNGEG  | Negative |
| P83886 | LTILASTCMARNVLTNGEGL  | Negative |
| P83886 | AAILTILASTCMARNVLTNG  | Negative |
| P83886 | CMARNVLTNGEGLYAGQSLD  | Negative |
| P83886 | GRTTSSPKAMMRIATVAAIL  | Negative |
| P83886 | MRIATVAAILTILASTCMAR  | Negative |
| P83886 | SPKAMMRIATVAAILTILAS  | Negative |
| P83886 | AMMRIATVAAILTILASTCM  | Negative |
| P83886 | TTSSPKAMMRIATVAAILTI  | Negative |
| P84298 | CIVGAIASPLTADEASLVQS  | Negative |
| P84298 | DEASLVQSSWKAVSHNEVEI  | Negative |
| P84298 | LCIVGAIASPLTADEASLVQ  | Negative |
| P84298 | ALCIVGAIASPLTADEASLV  | Negative |
| P84298 | LALCIVGAIASPLTADEASL  | Negative |
| P84298 | AVLALCIVGAIASPLTADEA  | Negative |
| P84298 | PLTADEASLVQSSWKAVSHN  | Negative |
| P84298 | FAVLALCIVGAIASPLTADE  | Negative |
| P84298 | VQSSWKAVSHNEVEILAAVF  | Negative |
| P84298 | LVQSSWKAVSHNEVEILAAV  | Negative |
| P84298 | ASLVQSSWKAVSHNEVEILA  | Negative |
| P84298 | SLVQSSWKAVSHNEVEILAA  | Negative |
| P84298 | MKFFAVLALCIVGAIASPLT  | Negative |
| P84298 | ASPLTADEASLVQSSWKAVS  | Negative |

|        |                       |          |
|--------|-----------------------|----------|
| P84298 | VGAIASPLTADEASLVQSSW  | Negative |
| P84298 | FFAVLALCIVGAIASPLTAD  | Negative |
| P84298 | EASLVQSSWKAVSHNEVEIL  | Negative |
| P84298 | AIASPLTADEASLVQSSWKA  | Negative |
| P84298 | SPLTADEASLVQSSWKAVSH  | Negative |
| P84298 | LTADEASLVQSSWKAVSHNE  | Negative |
| P84298 | QSSWKAVSHNEVEILAAVFA  | Negative |
| P84298 | SSWKAVSHNEVEILAAVFAA  | Negative |
| P84298 | SWKAVSHNEVEILAAVFAAY  | Negative |
| P84298 | IVGAIASPLTADEASLVQSS  | Negative |
| P84298 | IASPLTADEASLVQSSWKAV  | Negative |
| P84298 | VLALCIVGAIASPLTADEAS  | Negative |
| P84298 | ADEASLVQSSWKAVSHNEVE  | Negative |
| P84298 | TADEASLVQSSWKAVSHNEV  | Negative |
| P84298 | GAIASPLTADEASLVQSSWK  | Negative |
| P84516 | ADGNARQPPLAPGLSFDFYK  | Negative |
| P84516 | LAAAAVAADVVLICSSSTAT  | Negative |
| P84516 | AVVLICSSSTATAADGNARQ  | Negative |
| P84516 | AAVAADVVLICSSSTATAADG | Negative |
| P84516 | VAAVVLICSSSTATAADGNA  | Negative |
| P84516 | RAPTLAAAAVAADVVLICSS  | Negative |
| P84516 | SRAPTLAAAAVAADVVLICS  | Negative |
| P84516 | AAVAVVLICSSSTATAADGN  | Negative |
| P84516 | MSRAPTLAAAAVAADVVLIC  | Negative |
| P84516 | STATAADGNARQPPLAPGLS  | Negative |
| P84516 | AADGNARQPPLAPGLSFDFY  | Negative |
| P84516 | SSTATAADGNARQPPLAPGL  | Negative |
| P84516 | AAAAVAADVVLICSSSTAT   | Negative |
| P84516 | VVLICSSSTATAADGNARQP  | Negative |
| P84516 | TAADGNARQPPLAPGLSFDF  | Negative |
| P84516 | APTLAAAAVAADVVLICSSS  | Negative |
| P84516 | DGNARQPPLAPGLSFDFYKR  | Negative |
| P84516 | TATAADGNARQPPLAPGLSF  | Negative |
| P84516 | AAVAADVVLICSSSTATAAD  | Negative |
| P84516 | AAAVAAVVLICSSSTATAA   | Negative |
| P84516 | PTLAAAAVAADVVLICSSST  | Negative |
| P84516 | AAVVLICSSSTATAADGNAR  | Negative |
| P84516 | ICSSSTATAADGNARQPPLA  | Negative |
| P84516 | LICSSSTATAADGNARQPPL  | Negative |
| P84516 | CSSSTATAADGNARQPPLAP  | Negative |
| P84516 | GNARQPPLAPGLSFDFYKRS  | Negative |
| P84516 | SSSTATAADGNARQPPLAPG  | Negative |
| P84516 | ATAADGNARQPPLAPGLSFD  | Negative |
| P84516 | TLAAAAVAADVVLICSSSTA  | Negative |
| P84685 | NYCKIYCPDEKVKWSCKHR   | Negative |
| P84685 | EGEALDGYPLSKNNYCKIYC  | Negative |

|        |                      |          |
|--------|----------------------|----------|
| P84685 | LLIGLDEGEALDGYPLSKNN | Negative |
| P84685 | KNNYCKIYCPDEKVCKWSC  | Negative |
| P84685 | ILALLLIGLDEGEALDGYPL | Negative |
| P84685 | PIILALLLIGLDEGEALDGY | Negative |
| P84685 | LDGYPLSKNNYCKIYCPDEK | Negative |
| P84685 | PLSKNNYCKIYCPDEKVCKW | Negative |
| P84685 | IFPIILALLLIGLDEGEALD | Negative |
| P84685 | EALDGYPLSKNNYCKIYCPD | Negative |
| P84685 | NNYCKIYCPDEKVCKWSC   | Negative |
| P84685 | DEGEALDGYPLSKNNYCKIY | Negative |
| P84685 | ALDGYPLSKNNYCKIYCPDE | Negative |
| P84685 | DGYPLSKNNYCKIYCPDEKV | Negative |
| P84685 | ALLLIGLDEGEALDGYPLSK | Negative |
| P84685 | SIFPIILALLLIGLDEGEAL | Negative |
| P84685 | MSIFPIILALLLIGLDEGEA | Negative |
| P84685 | LALLLIGLDEGEALDGYPLS | Negative |
| P84685 | LSKNNYCKIYCPDEKVCKWS | Negative |
| P84685 | LLLIGLDEGEALDGYPLSKN | Negative |
| P84685 | LIGLDEGEALDGYPLSKNNY | Negative |
| P84685 | SKNNYCKIYCPDEKVCKWSC | Negative |
| P84685 | FPIILALLLIGLDEGEALDG | Negative |
| P84685 | GYPLSKNNYCKIYCPDEKVC | Negative |
| P84685 | LDEGEALDGYPLSKNNYCKI | Negative |
| P84685 | GLDEGEALDGYPLSKNNYCK | Negative |
| P84685 | YPLSKNNYCKIYCPDEKVCK | Negative |
| P84685 | IGLDEGEALDGYPLSKNNYC | Negative |
| P84685 | GEALDGYPLSKNNYCKIYCP | Negative |
| P84688 | YPLSKINNCKIYCPDDDVCK | Negative |
| P84688 | GLEETEALDGYPLSKINNCK | Negative |
| P84688 | LIGLEETEALDGYPLSKINN | Negative |
| P84688 | LLLIGLEETEALDGYPLSKI | Negative |
| P84688 | INNCKIYCPDDDVCKWTCKH | Negative |
| P84688 | LALLLIGLEETEALDGYPLS | Negative |
| P84688 | FPIVLALLLIGLEETEALDG | Negative |
| P84688 | IGLEETEALDGYPLSKINNC | Negative |
| P84688 | KINNCKIYCPDDDVCKWTCK | Negative |
| P84688 | SIFPIVLALLLIGLEETEAL | Negative |
| P84688 | LSKINNCKIYCPDDDVCKWT | Negative |
| P84688 | LEETEALDGYPLSKINNCKI | Negative |
| P84688 | IFPIVLALLLIGLEETEALD | Negative |
| P84688 | ALLLIGLEETEALDGYPLSK | Negative |
| P84688 | LDGYPLSKINNCKIYCPDDD | Negative |
| P84688 | NNCKIYCPDDDVCKWTCKHR | Negative |
| P84688 | ETEALDGYPLSKINNCKIYC | Negative |
| P84688 | VLALLLIGLEETEALDGYPL | Negative |
| P84688 | DGYPLSKINNCKIYCPDDDV | Negative |

|        |                        |          |
|--------|------------------------|----------|
| P84688 | ALDGYPLSKINNCKIYCPDD   | Negative |
| P84688 | EETEALDGYPLSKINNCKIY   | Negative |
| P84688 | PIVLALLLIGLEETEALDGY   | Negative |
| P84688 | EALDGYPLSKINNCKIYCPD   | Negative |
| P84688 | PLSKINNCKIYCPDDDVCKW   | Negative |
| P84688 | GYPLSKINNCKIYCPDDDV    | Negative |
| P84688 | LLIGLEETEALDGYPLSKIN   | Negative |
| P84688 | MSIFPIVLALLLIGLEETEA   | Negative |
| P84688 | TEALDGYPLSKINNCKIYCP   | Negative |
| P84688 | SKINNCKIYCPDDDVCKWTC   | Negative |
| P84693 | LIDL VAGSRSGYPVTQKGC   | Negative |
| P84693 | MKAIIFFIGCLMLIDL VAGS  | Negative |
| P84693 | VAGSRSGYPVTQKGC VYSCF  | Negative |
| P84693 | LVAGSRSGYPVTQKGC VYSC  | Negative |
| P84693 | PVTQKGC VYSCFWGSNWWCN  | Negative |
| P84693 | QKGC VYSCFWGSNWWCNAEC  | Negative |
| P84693 | YPVTQKGC VYSCFWGSNWWC  | Negative |
| P84693 | FIGCLMLIDL VAGSRSGYPV  | Negative |
| P84693 | IIFFIGCLMLIDL VAGSRSG  | Negative |
| P84693 | DL VAGSRSGYPVTQKGC VYS | Negative |
| P84693 | KGC VYSCFWGSNWWCNAECT  | Negative |
| P84693 | RSGYPVTQKGC VYSCFWGSN  | Negative |
| P84693 | GCLMLIDL VAGSRSGYPVTQ  | Negative |
| P84693 | IGCLMLIDL VAGSRSGYPVT  | Negative |
| P84693 | AIIFFIGCLMLIDL VAGSRS  | Negative |
| P84693 | LMLIDL VAGSRSGYPVTQKG  | Negative |
| P84693 | GYPVTQKGC VYSCFWGSNWW  | Negative |
| P84693 | SRSYPVTQKGC VYSCFWGS   | Negative |
| P84693 | GSRSGYPVTQKGC VYSCFWG  | Negative |
| P84693 | CLMLIDL VAGSRSGYPVTQK  | Negative |
| P84693 | SGYPVTQKGC VYSCFWGSNW  | Negative |
| P84693 | VTQKGC VYSCFWGSNWWCNA  | Negative |
| P84693 | IDL VAGSRSGYPVTQKGC VY | Negative |
| P84693 | KAIIFFIGCLMLIDL VAGSR  | Negative |
| P84693 | GCVYSCFWGSNWWCNAECTA   | Negative |
| P84693 | TQKGC VYSCFWGSNWWCNAE  | Negative |
| P84693 | MLIDL VAGSRSGYPVTQKGC  | Negative |
| P84693 | AGSRSGYPVTQKGC VYSCFW  | Negative |
| P84693 | FFIGCLMLIDL VAGSRSGYP  | Negative |
| P84777 | GMLVIFILCSTCYISVDSQI   | Negative |
| P84777 | FILCSTCYISVDSQIDTNVK   | Negative |
| P84777 | LCSTCYISVDSQIDTNVKCS   | Negative |
| P84777 | CYISVDSQIDTNVKCSGSSK   | Negative |
| P84777 | LVIFILCSTCYISVDSQIDT   | Negative |
| P84777 | CSTCYISVDSQIDTNVKCSG   | Negative |
| P84777 | ISVDSQIDTNVKCSGSSKCV   | Negative |

|        |                      |          |
|--------|----------------------|----------|
| P84777 | KAFYGMLVIFILCSTCYISV | Negative |
| P84777 | STCYISVDSQIDTNVKCSGS | Negative |
| P84777 | VDSQIDTNVKCSGSSKCVKI | Negative |
| P84777 | MLVIFILCSTCYISVDSQID | Negative |
| P84777 | QIDTNVKCSGSSKCVKICID | Negative |
| P84777 | KCSGSSKCVKICIDRYNTRG | Negative |
| P84777 | VKCSGSSKCVKICIDRYNTR | Negative |
| P84777 | YGMLVIFILCSTCYISVDSQ | Negative |
| P84777 | NVKCSGSSKCVKICIDRYNT | Negative |
| P84777 | SVDSQIDTNVKCSGSSKCVK | Negative |
| P84777 | IFILCSTCYISVDSQIDTNV | Negative |
| P84777 | FYGMLVIFILCSTCYISVDS | Negative |
| P84777 | DTNVKCSGSSKCVKICIDRY | Negative |
| P84777 | ILCSTCYISVDSQIDTNVKC | Negative |
| P84777 | SQIDTNVKCSGSSKCVKICI | Negative |
| P84777 | DSQIDTNVKCSGSSKCVKIC | Negative |
| P84777 | MKAFYGMLVIFILCSTCYIS | Negative |
| P84777 | YISVDSQIDTNVKCSGSSKC | Negative |
| P84777 | TCYISVDSQIDTNVKCSGSS | Negative |
| P84777 | AFYGMLVIFILCSTCYISVD | Negative |
| P84777 | IDTNVKCSGSSKCVKICIDR | Negative |
| P84777 | TNVKCSGSSKCVKICIDRYN | Negative |
| P84805 | RRKKKQKEIVDLHNSLRRRV | Negative |
| P84805 | FGNVDFNSESTRRKKKQKEI | Negative |
| P84805 | AFSLLCLAAVLRQSFGNVDF | Negative |
| P84805 | LLCLAAVLRQSFGNVDFNSE | Negative |
| P84805 | AVLRQSFGNVDFNSESTRRK | Negative |
| P84805 | NVDFNSESTRRKKKQKEIVD | Negative |
| P84805 | VDFNSESTRRKKKQKEIVDL | Negative |
| P84805 | VLRQSFGNVDFNSESTRRK  | Negative |
| P84805 | ESTRRKKKQKEIVDLHNSLR | Negative |
| P84805 | LCLAAVLRQSFGNVDFNSES | Negative |
| P84805 | FNSESTRRKKKQKEIVDLHN | Negative |
| P84805 | RQSFGNVDFNSESTRRKKKQ | Negative |
| P84805 | RKKKQKEIVDLHNSLRRRV  | Negative |
| P84805 | KKKQKEIVDLHNSLRRRVSP | Negative |
| P84805 | TRRKKKQKEIVDLHNSLRRR | Negative |
| P84805 | MIAFSLLCLAAVLRQSFGNV | Negative |
| P84805 | IAFSLLCLAAVLRQSFGNVD | Negative |
| P84805 | SLLCLAAVLRQSFGNVDFNS | Negative |
| P84805 | CLAAVLRQSFGNVDFNSEST | Negative |
| P84805 | DFNSESTRRKKKQKEIVDLH | Negative |
| P84805 | NSESTRRKKKQKEIVDLHNS | Negative |
| P84805 | LRQSFGNVDFNSESTRRKKK | Negative |
| P84805 | SFGNVDFNSESTRRKKKQKE | Negative |
| P84805 | QSFGNVDFNSESTRRKKKQK | Negative |

|        |                      |          |
|--------|----------------------|----------|
| P84805 | GNVDFNSESTRKKKQKEIV  | Negative |
| P84805 | AAVLRQSFGNVDFNSESTR  | Negative |
| P84805 | STRRKKKQKEIVDLHNSLRR | Negative |
| P84805 | LAAVLRQSFGNVDFNSESTR | Negative |
| P84805 | SESTRRKKKQKEIVDLHNSL | Negative |
| P84809 | SMVCGGNVFPNRELGILYGC | Negative |
| P84809 | NRELGILYGCKGYGNAFCDK | Negative |
| P84809 | NVFPNRELGILYGCKGYGNA | Negative |
| P84809 | ISVQVIFIAFISIIAFSMVC | Negative |
| P84809 | QVIFIAFISIIAFSMVCGGN | Negative |
| P84809 | IAFISIIAFSMVCGGNVFPN | Negative |
| P84809 | ELGILYGCKGYGNAFCDKVC | Negative |
| P84809 | AFSMVCGGNVFPNRELGILY | Negative |
| P84809 | CGGNVFPNRELGILYGCKGY | Negative |
| P84809 | ISIIAFSMVCGGNVFPNREL | Negative |
| P84809 | GNVFPNRELGILYGCKGYGN | Negative |
| P84809 | IIAFSMVCGGNVFPNRELGI | Negative |
| P84809 | VFPNRELGILYGCKGYGNAF | Negative |
| P84809 | MISVQVIFIAFISIIAFSMV | Negative |
| P84809 | SVQVIFIAFISIIAFSMVCG | Negative |
| P84809 | AFISIIAFSMVCGGNVFPNR | Negative |
| P84809 | PNRELGILYGCKGYGNAFCD | Negative |
| P84809 | SIIAFSMVCGGNVFPNRELG | Negative |
| P84809 | VQVIFIAFISIIAFSMVCGG | Negative |
| P84809 | GGNVFPNRELGILYGCKGYG | Negative |
| P84809 | RELGILYGCKGYGNAFCDKV | Negative |
| P84809 | IFIAFISIIAFSMVCGGNVF | Negative |
| P84809 | VCGGNVFPNRELGILYGCKG | Negative |
| P84809 | IAFSMVCGGNVFPNRELGIL | Negative |
| P84809 | MVCGGNVFPNRELGILYGCK | Negative |
| P84809 | FISIIAFSMVCGGNVFPNRE | Negative |
| P84809 | FPNRELGILYGCKGYGNAFC | Negative |
| P84809 | FSMVCGGNVFPNRELGILYG | Negative |
| P84809 | VIFIAFISIIAFSMVCGGNV | Negative |
| P84810 | IGSIHGISGNYPLNPYGGYY | Negative |
| P84810 | KLVLFGIIVILFSLIGSIHG | Negative |
| P84810 | LVLFGIIVILFSLIGSIHGI | Negative |
| P84810 | LFSLIGSIHGISGNYPLNPY | Negative |
| P84810 | IIVILFSLIGSIHGISGNYP | Negative |
| P84810 | SGNYPLNPYGGYYYCTILGE | Negative |
| P84810 | YPLNPYGGYYYCTILGENEY | Negative |
| P84810 | NYPLNPYGGYYYCTILGENE | Negative |
| P84810 | IHGISGNYPLNPYGGYYYCT | Negative |
| P84810 | NPYGGYYYCTILGENEYCKK | Negative |
| P84810 | ISGNYPLNPYGGYYYCTILG | Negative |
| P84810 | GISGNYPLNPYGGYYYCTIL | Negative |



|        |                       |          |
|--------|-----------------------|----------|
| P84810 | PLNPYGGYYYCTILGENEYC  | Negative |
| P84810 | VLFGIIVILFSLIGSIHGIS  | Negative |
| P84810 | SLIGSIHGISGNYPLNPYGG  | Negative |
| P84810 | GNYPLNPYGGYYYCTILGEN  | Negative |
| P84810 | HGISGNYPLNPYGGYYYCTI  | Negative |
| P84810 | FSLIGSIHGISGNYPLNPYG  | Negative |
| P84810 | IVILFSLIGSIHGISGNYPL  | Negative |
| P84810 | LFGIIVILFSLIGSIHGISG  | Negative |
| P84810 | MKLVLFGIIVILFSLIGSIH  | Negative |
| P84810 | LIGSIHGISGNYPLNPYGGY  | Negative |
| P84810 | FGIIVILFSLIGSIHGISGN  | Negative |
| P84810 | GSIHGISGNYPLNPYGGYYY  | Negative |
| P84810 | VILFSLIGSIHGISGNYPLN  | Negative |
| P84810 | LNPYGGYYYCTILGENEYCK  | Negative |
| P84810 | MMKLVLFGIIVILFSLIGSI  | Negative |
| P84810 | ILFSLIGSIHGISGNYPLNP  | Negative |
| P84810 | SIHGISGNYPLNPYGGYYC   | Negative |
| P84838 | AANATIITGPYVDLGGGYNL  | Negative |
| P84838 | LMAAAPVAANATIITGPYVD  | Negative |
| P84838 | NATIITGPYVDLGGGYNLVQ  | Negative |
| P84838 | TLMAAAPVAANATIITGPYV  | Negative |
| P84838 | LLATTLM AAPVAANATIIT  | Negative |
| P84838 | RLRTALLATTLM AAPVAAN  | Negative |
| P84838 | ATTLM AAPVAANATIITGP  | Negative |
| P84838 | TTLMAAAPVAANATIITGPY  | Negative |
| P84838 | IITGPYVDLGGGYNLVQNQH  | Negative |
| P84838 | VDLGGGYNLVQNQHGHFSND  | Negative |
| P84838 | ATIITGPYVDLGGGYNLVQN  | Negative |
| P84838 | MRLRTALLATTLM AAPVAA  | Negative |
| P84838 | LRTALLATTLM AAPVAANA  | Negative |
| P84838 | TIITGPYVDLGGGYNLVQNNQ | Negative |
| P84838 | AAPVAANATIITGPYVDLGG  | Negative |
| P84838 | ANATIITGPYVDLGGGYNLV  | Negative |
| P84838 | GPYVDLGGGYNLVQNQHGHF  | Negative |
| P84838 | TGPYVDLGGGYNLVQNQHGH  | Negative |
| P84838 | MAAAPVAANATIITGPYVDL  | Negative |
| P84838 | VAANATIITGPYVDLGGGYN  | Negative |
| P84838 | YVDLGGGYNLVQNQHGHFSN  | Negative |
| P84838 | TALLATTLM AAPVAANATI  | Negative |
| P84838 | RTALLATTLM AAPVAANAT  | Negative |
| P84838 | PYVDLGGGYNLVQNQHGHFS  | Negative |
| P84838 | ITGPYVDLGGGYNLVQNQHGH | Negative |
| P84838 | AAAPVAANATIITGPYVDLG  | Negative |
| P84838 | ALLATTLM AAPVAANATII  | Negative |
| P84838 | APVAANATIITGPYVDLGGG  | Negative |
| P84838 | PVAANATIITGPYVDLGGGY  | Negative |

|        |                      |          |
|--------|----------------------|----------|
| P84843 | DECPRICTADYRPVCGTPSG | Negative |
| P84843 | VLVLLIATFVAADECPRIC  | Negative |
| P84843 | ECPRICTADYRPVCGTPSGG | Negative |
| P84843 | ATFVAADECPRICTADYRPV | Negative |
| P84843 | LVVLLIATFVAADECPRICT | Negative |
| P84843 | AADECPRICTADYRPVCGTP | Negative |
| P84843 | ALFSVLVVLLIATFVAADEC | Negative |
| P84843 | MKFALFSVLVVLLIATFVAA | Negative |
| P84843 | LLIATFVAADECPRICTADY | Negative |
| P84843 | KFALFSVLVVLLIATFVAAD | Negative |
| P84843 | DYRPVCGTPSGGRRSANRTF | Negative |
| P84843 | RICTADYRPVCGTPSGGRRS | Negative |
| P84843 | PRICTADYRPVCGTPSGGRR | Negative |
| P84843 | CTADYRPVCGTPSGGRRSAN | Negative |
| P84843 | VVLLIATFVAADECPRICTA | Negative |
| P84843 | ADECPRICTADYRPVCGTPS | Negative |
| P84843 | CPRICTADYRPVCGTPSGGR | Negative |
| P84843 | IATFVAADECPRICTADYRP | Negative |
| P84843 | FVAADECPRICTADYRPVCG | Negative |
| P84843 | LFSVLVVLLIATFVAADECP | Negative |
| P84843 | ADYRPVCGTPSGGRRSANRT | Negative |
| P84843 | FALFSVLVVLLIATFVAADE | Negative |
| P84843 | LIATFVAADECPRICTADYR | Negative |
| P84843 | TFVAADECPRICTADYRPVC | Negative |
| P84843 | SVLVVLLIATFVAADECPRI | Negative |
| P84843 | VLLIATFVAADECPRICTAD | Negative |
| P84843 | TADYRPVCGTPSGGRRSANR | Negative |
| P84843 | ICTADYRPVCGTPSGGRRSA | Negative |
| P84843 | VAADECPRICTADYRPVCGT | Negative |
| P84888 | MVLAGGAQAQDKPREVLTGG | Negative |
| P84888 | KLTTAAAMLGLMVLAGGAQA | Negative |
| P84888 | AQDKPREVLTGGHSVSAPQE | Negative |
| P84888 | REVLTGGHSVSAPQENRIYV | Negative |
| P84888 | PREVLTGGHSVSAPQENRIY | Negative |
| P84888 | FKLTTAAAMLGLMVLAGGAQ | Negative |
| P84888 | AGGAQAQDKPREVLTGGHSV | Negative |
| P84888 | QDKPREVLTGGHSVSAPQEN | Negative |
| P84888 | TTAAAMLGLMVLAGGAQAQD | Negative |
| P84888 | GGAQAQDKPREVLTGGHSVS | Negative |
| P84888 | TAAAMLGLMVLAGGAQAQDK | Negative |
| P84888 | GLMVLAGGAQAQDKPREVLT | Negative |
| P84888 | MKSKFKLTTAAAMLGLMVLA | Negative |
| P84888 | KPREVLTGGHSVSAPQENRI | Negative |
| P84888 | KSKFKLTTAAAMLGLMVLAG | Negative |
| P84888 | AAAMLGLMVLAGGAQAQDKP | Negative |
| P84888 | LAGGAQAQDKPREVLTGGHS | Negative |

|        |                       |          |
|--------|-----------------------|----------|
| P84888 | LMVLAGGAQAQDKPREVLTG  | Negative |
| P84888 | KFKLTAAAMLGLMVLAGGA   | Negative |
| P84888 | VLAGGAQAQDKPREVLTGGH  | Negative |
| P84888 | SKFKLTAAAMLGLMVLAGG   | Negative |
| P84888 | AQAQDKPREVLTGGHSVSAP  | Negative |
| P84888 | LTAAAMLGLMVLAGGAQAQ   | Negative |
| P84888 | DKPREVLTGGHSVSAPQENR  | Negative |
| P84888 | QAQDKPREVLTGGHSVSAPQ  | Negative |
| P84888 | LGLMVLAGGAQAQDKPREVL  | Negative |
| P84888 | GAQAQDKPREVLTGGHSVSA  | Negative |
| P84888 | AMLGLMVLAGGAQAQDKPRE  | Negative |
| P84888 | MLGLMVLAGGAQAQDKPREV  | Negative |
| P84908 | RMGWAVTAAVTIVLAQSSL   | Negative |
| P84908 | TSGWRAPSCTKVTGDGAVTF  | Negative |
| P84908 | AVTAAVTIVLAQSSLAAQA   | Negative |
| P84908 | AAQAADSTSGWRAPSCTKVT  | Negative |
| P84908 | QAADSTSGWRAPSCTKVTGD  | Negative |
| P84908 | TAAVTIVLAQSSLAAQAAD   | Negative |
| P84908 | VLAQSSLAAQAADSTSGWRA  | Negative |
| P84908 | GWAVTAAVTIVLAQSSLAA   | Negative |
| P84908 | MGWAVTAAVTIVLAQSSLA   | Negative |
| P84908 | AADSTSGWRAPSCTKVTGDG  | Negative |
| P84908 | TIVLAQSSLAAQAADSTSGW  | Negative |
| P84908 | AQAADSTSGWRAPSCTKVTG  | Negative |
| P84908 | AQSSLAAQAADSTSGWRAPS  | Negative |
| P84908 | KRMGWAVTAAVTIVLAQSS   | Negative |
| P84908 | ADSTSGWRAPSCTKVTGDGA  | Negative |
| P84908 | QSSLAAQAADSTSGWRAPSC  | Negative |
| P84908 | LAQSSLAAQAADSTSGWRAP  | Negative |
| P84908 | AVTIVLAQSSLAAQAADST   | Negative |
| P84908 | VTAAVTIVLAQSSLAAQAA   | Negative |
| P84908 | SSLAAQAADSTSGWRAPSCT  | Negative |
| P84908 | IVLAQSSLAAQAADSTSGWR  | Negative |
| P84908 | DSTSGWRAPSCTKVTGDGAV  | Negative |
| P84908 | TTIVLAQSSLAAQAADSTSG  | Negative |
| P84908 | SLAAQAADSTSGWRAPSCTK  | Negative |
| P84908 | LAAQAADSTSGWRAPSCTKV  | Negative |
| P84908 | MKRMGWAVTAAVTIVLAQS   | Negative |
| P84908 | STSGWRAPSCTKVTGDGAVT  | Negative |
| P84908 | WAVTAAVTIVLAQSSLAAQ   | Negative |
| P84908 | AAVTIVLAQSSLAAQAADS   | Negative |
| P85045 | YISWEDSCSYLQLQKYERCE  | Negative |
| P85045 | SWEDSCSYLQLQKYERCELA  | Negative |
| P85045 | YERCELA KALKKGGLADFKG | Negative |
| P85045 | QLQKYERCELA KALKKGGLA | Negative |
| P85045 | KYERCELA KALKKGGLADFK | Negative |

|        |                      |          |
|--------|----------------------|----------|
| P85045 | QKYERCELAKALKKGGLADF | Negative |
| P85045 | LAKALKKGGLADFKGYSLEN | Negative |
| P85045 | RCELAKALKKGGLADFKGYS | Negative |
| P85045 | KGGLADFKGYSLENWICTAF | Negative |
| P85045 | KYISWEDSCSYLQLQKYERC | Negative |
| P85045 | LQLQKYERCELAKALKKGGL | Negative |
| P85045 | ELAKALKKGGLADFKGYSLE | Negative |
| P85045 | LKKGGLADFKGYSLENWICT | Negative |
| P85045 | YLQLQKYERCELAKALKKGG | Negative |
| P85045 | EDSCSYLQLQKYERCELA   | Negative |
| P85045 | SYLQLQKYERCELAKALKKG | Negative |
| P85045 | KALKKGGLADFKGYSLENWI | Negative |
| P85045 | ALKKGGLADFKGYSLENWIC | Negative |
| P85045 | CSYLQLQKYERCELAKALKK | Negative |
| P85045 | ISWEDSCSYLQLQKYERCEL | Negative |
| P85045 | SCSYLQLQKYERCELAKALK | Negative |
| P85045 | AKALKKGGLADFKGYSLENW | Negative |
| P85045 | KKGGLADFKGYSLENWICTA | Negative |
| P85045 | LQKYERCELAKALKKGGLAD | Negative |
| P85045 | SGKYISWEDSCSYLQLQKYE | Negative |
| P85045 | ERCELAKALKKGGLADFKGY | Negative |
| P85045 | DSCSYLQLQKYERCELAKAL | Negative |
| P85045 | WEDSCSYLQLQKYERCELA  | Negative |
| P85045 | CELAALKKGGLADFKGYSL  | Negative |
| P85197 | LPGYVAPQYRFAPDYYPEGR | Negative |
| P85197 | IVLAAFIGVCAGGALPGYVA | Negative |
| P85197 | CAGGALPGYVAPQYRFAPDY | Negative |
| P85197 | AAFIGVCAGGALPGYVAPQY | Negative |
| P85197 | MMKLIVLAAFIGVCAGGALP | Negative |
| P85197 | AFIGVCAGGALPGYVAPQYR | Negative |
| P85197 | GGALPGYVAPQYRFAPDYYP | Negative |
| P85197 | ALPGYVAPQYRFAPDYYPEG | Negative |
| P85197 | QYRFAPDYYPEGRYRPNVEG | Negative |
| P85197 | YVAPQYRFAPDYYPEGRYRP | Negative |
| P85197 | PQYRFAPDYYPEGRYRPNVE | Negative |
| P85197 | VLAAFIGVCAGGALPGYVAP | Negative |
| P85197 | FIGVCAGGALPGYVAPQYRF | Negative |
| P85197 | FAPDYYPEGRYRPNVEGNAA | Negative |
| P85197 | RFAPDYYPEGRYRPNVEGNA | Negative |
| P85197 | LAAFIGVCAGGALPGYVAPQ | Negative |
| P85197 | IGVCAGGALPGYVAPQYRFA | Negative |
| P85197 | YRFAPDYYPEGRYRPNVEGN | Negative |
| P85197 | APQYRFAPDYYPEGRYRPNV | Negative |
| P85197 | VAPQYRFAPDYYPEGRYRPN | Negative |
| P85197 | AGGALPGYVAPQYRFAPDYY | Negative |
| P85197 | GYVAPQYRFAPDYYPEGRYR | Negative |

|        |                      |          |
|--------|----------------------|----------|
| P85197 | GVCAGGALPGYVAPQYRFAP | Negative |
| P85197 | KLIVLAAFIGVCAGGALPGY | Negative |
| P85197 | LIVLAAFIGVCAGGALPGYV | Negative |
| P85197 | GALPGYVAPQYRFAPDYYPE | Negative |
| P85197 | PGYVAPQYRFAPDYYPEGRY | Negative |
| P85197 | VCAGGALPGYVAPQYRFAPD | Negative |
| P85197 | APDYYPEGRYRPNVEGNAAV | Negative |
| P85213 | LSFLVIVSSPQNAVQADTLI | Negative |
| P85213 | SVLLLVLCLSLVIVSSPQNA | Negative |
| P85213 | VQADTLIGSCVWGATNYTSD | Negative |
| P85213 | QNAVQADTLIGSCVWGATNY | Negative |
| P85213 | DTLIGSCVWGATNYTSDCNA | Negative |
| P85213 | QADTLIGSCVWGATNYTSDC | Negative |
| P85213 | AVQADTLIGSCVWGATNYTS | Negative |
| P85213 | PQNAVQADTLIGSCVWGATN | Negative |
| P85213 | CLSFLVIVSSPQNAVQADTL | Negative |
| P85213 | IVSSPQNAVQADTLIGSCVW | Negative |
| P85213 | FLVIVSSPQNAVQADTLIGS | Negative |
| P85213 | FQSVLLLVLCLSLVIVSSPQ | Negative |
| P85213 | SSPQNAVQADTLIGSCVWGA | Negative |
| P85213 | NFQSVLLLVLCLSLVIVSSP | Negative |
| P85213 | KNFQSVLLLVLCLSLVIVSS | Negative |
| P85213 | LVCLSLVIVSSPQNAVQAD  | Negative |
| P85213 | QSVLLLVLCLSLVIVSSPQN | Negative |
| P85213 | AKNFQSVLLLVLCLSLVIVS | Negative |
| P85213 | VCLSLVIVSSPQNAVQADT  | Negative |
| P85213 | LVIVSSPQNAVQADTLIGSC | Negative |
| P85213 | ADTLIGSCVWGATNYTSDCN | Negative |
| P85213 | SPQNAVQADTLIGSCVWGAT | Negative |
| P85213 | MAKNFQSVLLLVLCLSLVIV | Negative |
| P85213 | VLLLVLCLSLVIVSSPQNAV | Negative |
| P85213 | VIVSSPQNAVQADTLIGSCV | Negative |
| P85213 | LLVLCLSLVIVSSPQNAVQ  | Negative |
| P85213 | NAVQADTLIGSCVWGATNYT | Negative |
| P85213 | LLVLCLSLVIVSSPQNAVQA | Negative |
| P85213 | VSSPQNAVQADTLIGSCVWG | Negative |
| P86009 | TLFAVITSSTCKKYSCEGE  | Negative |
| P86009 | MLRFAVTLFAVITSSTCKKY | Negative |
| P86009 | CKKYSCEGETHKLKPSPEP  | Negative |
| P86009 | LEGETHKLKPSPEPNMQECT | Negative |
| P86009 | YSCLEGETHKLKPSPEPNMQ | Negative |
| P86009 | FAVTLFAVITSSTCKKYSCL | Negative |
| P86009 | GETHKLKPSPEPNMQECTLY | Negative |
| P86009 | HKLKPSPEPNMQECTLYSES | Negative |
| P86009 | EGETHKLKPSPEPNMQECTL | Negative |
| P86009 | STCKKYSCEGETHKLKPS   | Negative |

|        |                      |          |
|--------|----------------------|----------|
| P86009 | SSTCKKYSCLEGETHKLKPS | Negative |
| P86009 | KYSCLEGETHKLKPSPEPNM | Negative |
| P86009 | VITSSTCKKYSCLEGETHKL | Negative |
| P86009 | FAVITSSTCKKYSCLEGETH | Negative |
| P86009 | LKPSPEPNMQECTLYSESSC | Negative |
| P86009 | AVITSSTCKKYSCLEGETHK | Negative |
| P86009 | AVTLFAVITSSTCKKYSCLE | Negative |
| P86009 | KLKPSPEPNMQECTLYSESS | Negative |
| P86009 | THKLKPSPEPNMQECTLYSE | Negative |
| P86009 | LRFAVTLFAVITSSTCKKYS | Negative |
| P86009 | TSSTCKKYSCLEGETHKLKP | Negative |
| P86009 | LFAVITSSTCKKYSCLEGET | Negative |
| P86009 | KKYSCLEGETHKLKPSPEPN | Negative |
| P86009 | VTLFAVITSSTCKKYSCLEG | Negative |
| P86009 | CLEGETHKLKPSPEPNMQEC | Negative |
| P86009 | TCKKYSCLEGETHKLKPSPE | Negative |
| P86009 | ETHKLKPSPEPNMQECTLYS | Negative |
| P86009 | ITSSTCKKYSCLEGETHKLK | Negative |
| P86009 | SCLEGETHKLKPSPEPNMQE | Negative |
| P86100 | ILFASILAAISATSADFKVV | Negative |
| P86100 | TQNIQMTEMYQIILFASILA | Negative |
| P86100 | ILAAISATSADFKVVWEVPS | Negative |
| P86100 | SILAAISATSADFKVVWEVP | Negative |
| P86100 | ADFKVVWEVPSIMCSKKFKI | Negative |
| P86100 | DFKVVWEVPSIMCSKKFKIN | Negative |
| P86100 | MYQIILFASILAAISATSAD | Negative |
| P86100 | QMTEMYQIILFASILAAISA | Negative |
| P86100 | MTEMYQIILFASILAAISAT | Negative |
| P86100 | MTQNIQMTEMYQIILFASIL | Negative |
| P86100 | QIILFASILAAISATSADFK | Negative |
| P86100 | QNIQMTEMYQIILFASILAA | Negative |
| P86100 | FASILAAISATSADFKVVWE | Negative |
| P86100 | TEMYQIILFASILAAISATS | Negative |
| P86100 | ATSADFKVVWEVPSIMCSKK | Negative |
| P86100 | IILFASILAAISATSADFKV | Negative |
| P86100 | IQMTEMYQIILFASILAAIS | Negative |
| P86100 | NIQMTEMYQIILFASILAAI | Negative |
| P86100 | LFASILAAISATSADFKVVW | Negative |
| P86100 | AISATSADFKVVWEVPSIMC | Negative |
| P86100 | EMYQIILFASILAAISATSA | Negative |
| P86100 | SADFKVVWEVPSIMCSKKFK | Negative |
| P86100 | LAAISATSADFKVVWEVPSI | Negative |
| P86100 | ASILAAISATSADFKVVWEV | Negative |
| P86100 | SATSADFKVVWEVPSIMCSK | Negative |
| P86100 | FKVVWEVPSIMCSKKFKINV | Negative |
| P86100 | AAISATSADFKVVWEVPSIM | Negative |

|        |                      |          |
|--------|----------------------|----------|
| P86100 | TSADFKVVWEVPSIMCSKKF | Negative |
| P86100 | ISATSADFKVVWEVPSIMCS | Negative |
| P86242 | ATGITLAAGPASADIPIGQK | Negative |
| P86242 | RRVRRVRFAACALVAAATGI | Negative |
| P86242 | RVRFAACALVAAATGITLAA | Negative |
| P86242 | AAGPASADIPIGQKMTGKMT | Negative |
| P86242 | ALVAAATGITLAAGPASADI | Negative |
| P86242 | TGITLAAGPASADIPIGQKM | Negative |
| P86242 | REFRRVRRVRFAACALVAAA | Negative |
| P86242 | GITLAAGPASADIPIGQKMT | Negative |
| P86242 | RVRRVRFAACALVAAATGIT | Negative |
| P86242 | RRVRFAACALVAAATGITLA | Negative |
| P86242 | ITLAAGPASADIPIGQKMTG | Negative |
| P86242 | LVAAATGITLAAGPASADIP | Negative |
| P86242 | LAAGPASADIPIGQKMTGKM | Negative |
| P86242 | TLAAGPASADIPIGQKMTGK | Negative |
| P86242 | GPASADIPIGQKMTGKMTYY | Negative |
| P86242 | PASADIPIGQKMTGKMTYYT | Negative |
| P86242 | FRRVRRVRFAACALVAAATG | Negative |
| P86242 | VRFAACALVAAATGITLAAG | Negative |
| P86242 | MREFRRVRRVRFAACALVAA | Negative |
| P86242 | EFRRVRRVRFAACALVAAAT | Negative |
| P86242 | CALVAAATGITLAAGPASAD | Negative |
| P86242 | VAAATGITLAAGPASADIP  | Negative |
| P86242 | ACALVAAATGITLAAGPASA | Negative |
| P86242 | AATGITLAAGPASADIPIGQ | Negative |
| P86242 | AACALVAAATGITLAAGPAS | Negative |
| P86242 | FAACALVAAATGITLAAGPA | Negative |
| P86242 | RFAACALVAAATGITLAAGP | Negative |
| P86242 | VRRVRFAACALVAAATGITL | Negative |
| P86242 | AGPASADIPIGQKMTGKMTY | Negative |
| P86407 | GSFIKRMWRSKLAKKLRAKG | Negative |
| P86407 | ILLVIFIVTMLIVDEVNSFK | Negative |
| P86407 | FKFGSFIKRMWRSKLAKKL  | Negative |
| P86407 | IVTMLIVDEVNSFKFGSFIK | Negative |
| P86407 | KILLVIFIVTMLIVDEVNSF | Negative |
| P86407 | IVDEVNSFKFGSFIKRMWRS | Negative |
| P86407 | SFIKRMWRSKLAKKLRAKGK | Negative |
| P86407 | VDEVNSFKFGSFIKRMWRSK | Negative |
| P86407 | EVNSFKFGSFIKRMWRSKLA | Negative |
| P86407 | LVIFIVTMLIVDEVNSFKFG | Negative |
| P86407 | NKKILLVIFIVTMLIVDEVN | Negative |
| P86407 | NSFKFGSFIKRMWRSKLAKK | Negative |
| P86407 | LIVDEVNSFKFGSFIKRMWR | Negative |
| P86407 | SFKFGSFIKRMWRSKLAKKL | Negative |
| P86407 | IFIVTMLIVDEVNSFKFGSF | Negative |

|        |                      |          |
|--------|----------------------|----------|
| P86407 | MNKKILLVIFIVTMLIVDEV | Negative |
| P86407 | KFGSFIKRMWRSKLAKKLRA | Negative |
| P86407 | DEVNSFKFGSFIKRMWRSKL | Negative |
| P86407 | VNSFKFGSFIKRMWRSKLAK | Negative |
| P86407 | KRMWRSKLAKKLRAKGKELL | Negative |
| P86407 | FIKRMWRSKLAKKLRAKGKE | Negative |
| P86407 | MLIVDEVNSFKFGSFIKRMW | Negative |
| P86407 | KKILLVIFIVTMLIVDEVNS | Negative |
| P86407 | VTMLIVDEVNSFKFGSFIKR | Negative |
| P86407 | LLVIFIVTMLIVDEVNSFKF | Negative |
| P86407 | FIVTMLIVDEVNSFKFGSFI | Negative |
| P86407 | IKRMWRSKLAKKLRAKGKEL | Negative |
| P86407 | TMLIVDEVNSFKFGSFIKRM | Negative |
| P86407 | FGSFIKRMWRSKLAKKLRAK | Negative |
| P86870 | TIINLSFSEANNYCKIKCRS | Negative |
| P86870 | GFVYLILITTIINLSFSEAN | Negative |
| P86870 | KCRSGIHTLCKFGISTKPNC | Negative |
| P86870 | SEANNYCKIKCRSGIHTLCK | Negative |
| P86870 | ILITTIINLSFSEANNYCKI | Negative |
| P86870 | NYCKIKCRSGIHTLCKFGIS | Negative |
| P86870 | VYLILITTIINLSFSEANNY | Negative |
| P86870 | ANNYCKIKCRSGIHTLCKFG | Negative |
| P86870 | FVYLILITTIINLSFSEANN | Negative |
| P86870 | IKCRSGIHTLCKFGISTKPN | Negative |
| P86870 | YLILITTIINLSFSEANNYC | Negative |
| P86870 | LSFSEANNYCKIKCRSGIHT | Negative |
| P86870 | CKIKCRSGIHTLCKFGISTK | Negative |
| P86870 | IINLSFSEANNYCKIKCRSG | Negative |
| P86870 | SGFVYLILITTIINLSFSEA | Negative |
| P86870 | INLSFSEANNYCKIKCRSGI | Negative |
| P86870 | FSEANNYCKIKCRSGIHTLC | Negative |
| P86870 | TTIINLSFSEANNYCKIKCR | Negative |
| P86870 | ITTIINLSFSEANNYCKIKC | Negative |
| P86870 | YCKIKCRSGIHTLCKFGIST | Negative |
| P86870 | NNYCKIKCRSGIHTLCKFGI | Negative |
| P86870 | SFSEANNYCKIKCRSGIHTL | Negative |
| P86870 | KISGFVYLILITTIINLSFS | Negative |
| P86870 | ISGFVYLILITTIINLSFSE | Negative |
| P86870 | MKISGFVYLILITTIINLSF | Negative |
| P86870 | EANNYCKIKCRSGIHTLCKF | Negative |
| P86870 | NLSFSEANNYCKIKCRSGIH | Negative |
| P86870 | LITTIINLSFSEANNYCKIK | Negative |
| P86870 | KIKCRSGIHTLCKFGISTKP | Negative |
| P86872 | IFIINDVSSQGLGSNKNWKK | Negative |
| P86872 | MRRILCLAVVIFIINDVSSQ | Negative |
| P86872 | IINDVSSQGLGSNKNWKKSG | Negative |



|        |                      |          |
|--------|----------------------|----------|
| P86872 | VSSQGLGSNKNWKKSGMSLS | Negative |
| P86872 | WKKSGMSLSSPGNKKPTGNN | Negative |
| P86872 | NDVSSQGLGSNKNWKKSGMS | Negative |
| P86872 | LGSNKNWKKSGMSLSSPGNK | Negative |
| P86872 | NWKKSGMSLSSPGNKKPTGN | Negative |
| P86872 | KSGMSLSSPGNKKPTGNNNA | Negative |
| P86872 | KNWKKSGMSLSSPGNKKPTG | Negative |
| P86872 | GSNKNWKKSGMSLSSPGNKK | Negative |
| P86872 | FIINDVSSQGLGSNKNWKK  | Negative |
| P86872 | QGLGSNKNWKKSGMSLSSPG | Negative |
| P86872 | AVVIFIINDVSSQGLGSNKN | Negative |
| P86872 | RRILCLAVVIFIINDVSSQG | Negative |
| P86872 | LAVVIFIINDVSSQGLGSNK | Negative |
| P86872 | DVSSQGLGSNKNWKKSGMSL | Negative |
| P86872 | KKSGMSLSSPGNKKPTGNNN | Negative |
| P86872 | GLGSNKNWKKSGMSLSSPGN | Negative |
| P86872 | VIFIINDVSSQGLGSNKNWK | Negative |
| P86872 | ILCLAVVIFIINDVSSQGLG | Negative |
| P86872 | NKNWKKSGMSLSSPGNKKPT | Negative |
| P86872 | SQGLGSNKNWKKSGMSLSSP | Negative |
| P86872 | INDVSSQGLGSNKNWKKSGM | Negative |
| P86872 | RILCLAVVIFIINDVSSQGL | Negative |
| P86872 | VVIFIINDVSSQGLGSNKNW | Negative |
| P86872 | SNKNWKKSGMSLSSPGNKKP | Negative |
| P86872 | SSQGLGSNKNWKKSGMSLSS | Negative |
| P86872 | CLAVVIFIINDVSSQGLGSN | Negative |
| P86875 | FLQALVNGDSCGSNCEKSER | Negative |
| P86875 | NCEKSERPKRVFNIYWNVPT | Negative |
| P86875 | RPKRVFNIYWNVPTFMCHQY | Negative |
| P86875 | GSNCEKSERPKRVFNIYWNV | Negative |
| P86875 | FFLQALVNGDSCGSNCEKSE | Negative |
| P86875 | EKSERPKRVFNIYWNVPTFM | Negative |
| P86875 | TLFLFFLQALVNGDSCGSNC | Negative |
| P86875 | LFLFFLQALVNGDSCGSNCE | Negative |
| P86875 | VNGDSCGSNCEKSERPKRVF | Negative |
| P86875 | SERPKRVFNIYWNVPTFMCH | Negative |
| P86875 | PKRVFNIYWNVPTFMCHQYG | Negative |
| P86875 | LFFLQALVNGDSCGSNCEKS | Negative |
| P86875 | NGDSCGSNCEKSERPKRVFN | Negative |
| P86875 | CGSNCEKSERPKRVFNIYWN | Negative |
| P86875 | SCGSNCEKSERPKRVFNIYW | Negative |
| P86875 | ALVNGDSCGSNCEKSERPKR | Negative |
| P86875 | LVNGDSCGSNCEKSERPKRV | Negative |
| P86875 | ERPKRVFNIYWNVPTFMCHQ | Negative |
| P86875 | SNCEKSERPKRVFNIYWNVP | Negative |
| P86875 | VTLFLFFLQALVNGDSCGSN | Negative |

|        |                       |          |
|--------|-----------------------|----------|
| P86875 | LLVTLFLFFLQALVNGDSCG  | Negative |
| P86875 | KSERPKRVFNIYWNVPTFMC  | Negative |
| P86875 | GDSCGSNCEKSERPKRVFNI  | Negative |
| P86875 | MLLVTLFLFFLQALVNGDSC  | Negative |
| P86875 | DSCGSNCEKSERPKRVFNIY  | Negative |
| P86875 | CEKSERPKRVFNIYWNVPTF  | Negative |
| P86875 | LQALVNGDSCGSNCEKSERP  | Negative |
| P86875 | FLFFLQALVNGDSCGSNCEK  | Negative |
| P86875 | LVTFLFLFFLQALVNGDSCGS | Negative |
| P91627 | GVAHVPHPVQVSHPVGRSEDV | Negative |
| P91627 | LGVAAAGVAHVPHPVQVSHPV | Negative |
| P91627 | AVLGVAAAGVAHVPHPVQVSH | Negative |
| P91627 | GVAAAGVAHVPHPVQVSHPVG | Negative |
| P91627 | VAHVPHPVQVSHPVGRSEDVH | Negative |
| P91627 | FAVLGVAAAGVAHVPHPVQS  | Negative |
| P91627 | VGRSEDVHAEVKSEHSDVRA  | Negative |
| P91627 | HPQVSHPVGRSEDVHAEVKS  | Negative |
| P91627 | PHPQVSHPVGRSEDVHAEVK  | Negative |
| P91627 | HPVGRSEDVHAEVKSEHSDV  | Negative |
| P91627 | VSHPVGRSEDVHAEVKSEHS  | Negative |
| P91627 | MVFAVLGVAAAGVAHVPHPVQ | Negative |
| P91627 | VLGVAAAGVAHVPHPVQVSHP | Negative |
| P91627 | VPHPVQVSHPVGRSEDVHAEV | Negative |
| P91627 | KFVMVFAVLGVAAAGVAHVVP | Negative |
| P91627 | PVGRSEDVHAEVKSEHSDVR  | Negative |
| P91627 | AGVAHVPHPVQVSHPVGRSED | Negative |
| P91627 | MFKFVMVFAVLGVAAAGVAH  | Negative |
| P91627 | AHVPHPVQVSHPVGRSEDVHA | Negative |
| P91627 | QVSHPVGRSEDVHAEVKSEH  | Negative |
| P91627 | VFAVLGVAAAGVAHVPHPVQV | Negative |
| P91627 | SHPVGRSEDVHAEVKSEHSD  | Negative |
| P91627 | FVMVFAVLGVAAAGVAHVPH  | Negative |
| P91627 | AAAGVAHVPHPVQVSHPVGRS | Negative |
| P91627 | HVPHPVQVSHPVGRSEDVHAE | Negative |
| P91627 | VMVFAVLGVAAAGVAHVPHPV | Negative |
| P91627 | PQVSHPVGRSEDVHAEVKSE  | Negative |
| P91627 | AAGVAHVPHPVQVSHPVGRSE | Negative |
| P91627 | VAAAGVAHVPHPVQVSHPVGR | Negative |
| P91629 | HAEVKVLSSDVRADGFDL    | Negative |
| P91629 | VMVFAVLGLAAAVAPVSRSD  | Negative |
| P91629 | APVSRSDDVHAEVKVLSSDV  | Negative |
| P91629 | VFAVLGLAAAVAPVSRSDDV  | Negative |
| P91629 | SRSDDVHAEVKVLSSDVRAD  | Negative |
| P91629 | PVSRSDDVHAEVKVLSSDVR  | Negative |
| P91629 | FAVLGLAAAVAPVSRSDDVH  | Negative |
| P91629 | AAVAPVSRSDDVHAEVKVLS  | Negative |

|        |                      |          |
|--------|----------------------|----------|
| P91629 | MVFAVLGLAAAVAPVSRSD  | Negative |
| P91629 | VHAEVKVLSSDVRADGFD   | Negative |
| P91629 | AEVKVLSSDVRADGFD     | Negative |
| P91629 | DDVHAEVKVLSSDVRADG   | Negative |
| P91629 | VKVLSSDVRADGFD       | Negative |
| P91629 | MFKFVMVFAVLGLAAVAPV  | Negative |
| P91629 | VLGLAAAVAPVSRSDVHAE  | Negative |
| P91629 | FVMVFAVLGLAAVAPVSR   | Negative |
| P91629 | VSRSDDVHAEVKVLSSD    | Negative |
| P91629 | DVHAEVKVLSSDVRADG    | Negative |
| P91629 | SDDVHAEVKVLSSDVRAD   | Negative |
| P91629 | LGLAAAVAPVSRSDDVHAE  | Negative |
| P91629 | GLAAVAPVSRSDDVHAEVK  | Negative |
| P91629 | KFVMVFAVLGLAAVAPVSR  | Negative |
| P91629 | AVAPVSRSDDVHAEVKVLSS | Negative |
| P91629 | EVKVLSSDVRADGFD      | Negative |
| P91629 | LAAVAPVSRSDDVHAEVKV  | Negative |
| P91629 | AVLGLAAVAPVSRSDDVHA  | Negative |
| P91629 | RSDDVHAEVKVLSSDVRAD  | Negative |
| P91629 | AAVAPVSRSDDVHAEVKVL  | Negative |
| P91629 | VAPVSRSDDVHAEVKVLSSD | Negative |
| P91745 | LVKIGTLMPSMISCQDYYIC | Negative |
| P91745 | LASVAIMLIATVNAEYNVAK | Negative |
| P91745 | MIKTLLASVAIMLIATVNA  | Negative |
| P91745 | NVAKYCELVKIGTLMPSMIS | Negative |
| P91745 | CELVKIGTLMPSMISCQDYY | Negative |
| P91745 | NAEYNVAKYCELVKIGTLM  | Negative |
| P91745 | TVNAEYNVAKYCELVKIGT  | Negative |
| P91745 | AEYNVAKYCELVKIGTLMPS | Negative |
| P91745 | ATVNAEYNVAKYCELVKIGT | Negative |
| P91745 | IKTLLASVAIMLIATVNAEY | Negative |
| P91745 | VAIMLIATVNAEYNVAKYCE | Negative |
| P91745 | TLLASVAIMLIATVNAEYNV | Negative |
| P91745 | IMLIATVNAEYNVAKYCELV | Negative |
| P91745 | VNAEYNVAKYCELVKIGTLM | Negative |
| P91745 | MLIATVNAEYNVAKYCELVK | Negative |
| P91745 | YNVAKYCELVKIGTLMPSMI | Negative |
| P91745 | ELVKIGTLMPSMISCQDYYI | Negative |
| P91745 | ASVAIMLIATVNAEYNVAKY | Negative |
| P91745 | AKYCELVKIGTLMPSMISCQ | Negative |
| P91745 | AIMLIATVNAEYNVAKYCEL | Negative |
| P91745 | LIATVNAEYNVAKYCELVKI | Negative |
| P91745 | IATVNAEYNVAKYCELVKIG | Negative |
| P91745 | VAKYCELVKIGTLMPSMISC | Negative |
| P91745 | EYNVAKYCELVKIGTLMPSM | Negative |
| P91745 | KYCELVKIGTLMPSMISCQD | Negative |

|        |                      |          |
|--------|----------------------|----------|
| P91745 | SVAIMLIATVNAEYNVAKYC | Negative |
| P91745 | KTLLASVAIMLIATVNAEYN | Negative |
| P91745 | YCELVKIGTLMPSMISCQDY | Negative |
| P91745 | IIKTLLASVAIMLIATVNAE | Negative |
| P92192 | MAVARPNLAEIVRQVSDVEP | Negative |
| P92192 | IVRQVSDVEPEKWSSDVETS | Negative |
| P92192 | FAMAVARPNLAEIVRQVSDV | Negative |
| P92192 | MKFLIVFVALFAMAVARPNL | Negative |
| P92192 | AMAVARPNLAEIVRQVSDVE | Negative |
| P92192 | IVFVALFAMAVARPNLAEIV | Negative |
| P92192 | ALFAMAVARPNLAEIVRQVS | Negative |
| P92192 | EIVRQVSDVEPEKWSSDVET | Negative |
| P92192 | VRQVSDVEPEKWSSDVETSD | Negative |
| P92192 | VEPEKWSSDVETSDGTSIKQ | Negative |
| P92192 | VARPNLAEIVRQVSDVEPEK | Negative |
| P92192 | RQVSDVEPEKWSSDVETSDG | Negative |
| P92192 | NLAEIVRQVSDVEPEKWSSD | Negative |
| P92192 | DVEPEKWSSDVETSDGTSIK | Negative |
| P92192 | VALFAMAVARPNLAEIVRQV | Negative |
| P92192 | AVARPNLAEIVRQVSDVEPE | Negative |
| P92192 | LFAMAVARPNLAEIVRQVSD | Negative |
| P92192 | SDVEPEKWSSDVETSDGTSI | Negative |
| P92192 | ARNLAEIVRQVSDVEPEKW  | Negative |
| P92192 | PNLAEIVRQVSDVEPEKWSS | Negative |
| P92192 | VSDVEPEKWSSDVETSDGTS | Negative |
| P92192 | AEIVRQVSDVEPEKWSSDVE | Negative |
| P92192 | FLIVFVALFAMAVARPNLAE | Negative |
| P92192 | RPNLAEIVRQVSDVEPEKWS | Negative |
| P92192 | LAEIVRQVSDVEPEKWSSDV | Negative |
| P92192 | VFVALFAMAVARPNLAEIVR | Negative |
| P92192 | KFLIVFVALFAMAVARPNLA | Negative |
| P92192 | QVSDVEPEKWSSDVETSDGT | Negative |
| P92192 | FVALFAMAVARPNLAEIVRQ | Negative |
| P92201 | LAAPAAEPTIVRSESDVGP  | Negative |
| P92201 | ESDVGPESFKYDWETSDGQA | Negative |
| P92201 | SDVGPESFKYDWETSDGQAA | Negative |
| P92201 | TIVRSESDVGPESFKYDWET | Negative |
| P92201 | AAEPTIVRSESDVGPESFKY | Negative |
| P92201 | IVFVALFAVALAAPAAEPT  | Negative |
| P92201 | AAPAAEPTIVRSESDVGPE  | Negative |
| P92201 | ALAAPAAEPTIVRSESDVG  | Negative |
| P92201 | VALAAPAAEPTIVRSESDV  | Negative |
| P92201 | PAAEPTIVRSESDVGPESF  | Negative |
| P92201 | FAVALAAPAAEPTIVRSES  | Negative |
| P92201 | LFAVALAAPAAEPTIVRSE  | Negative |
| P92201 | FLIVFVALFAVALAAPAAEE | Negative |

|        |                      |          |
|--------|----------------------|----------|
| P92201 | KFLIVFVALFAVALAAPAAE | Negative |
| P92201 | VRSESDVGPESFKYDWETSD | Negative |
| P92201 | ALFAVALAAPAAEEPTIVRS | Negative |
| P92201 | APAAEEPTIVRSESDVGPES | Negative |
| P92201 | IVRSESDVGPESFKYDWETS | Negative |
| P92201 | AVALAAPAAEEPTIVRSESD | Negative |
| P92201 | EEPTIVRSESDVGPESFKYD | Negative |
| P92201 | FVALFAVALAAPAAEEPTIV | Negative |
| P92201 | PTIVRSESDVGPESFKYDWE | Negative |
| P92201 | AAEEPTIVRSESDVGPESFK | Negative |
| P92201 | EPTIVRSESDVGPESFKYDW | Negative |
| P92201 | RSESDVGPESFKYDWETSDG | Negative |
| P92201 | SESDVGPESFKYDWETSDGQ | Negative |
| P92201 | VFVALFAVALAAPAAEEPTI | Negative |
| P92201 | MKFLIVFVALFAVALAAPAA | Negative |
| P92201 | VALFAVALAAPAAEEPTIVR | Negative |
| P93543 | HPTHAPPTVYPSVSFNLTE  | Negative |
| P93543 | LGIHGAHPHTSAPPTVYPSV | Negative |
| P93543 | HGAHPHTSAPPTVYPSVSFN | Negative |
| P93543 | GLGIHGAHPHTSAPPTVYPS | Negative |
| P93543 | CGLGIHGAHPHTSAPPTVYP | Negative |
| P93543 | MKVVATILYLVVLAICGLGI | Negative |
| P93543 | GAHPHTSAPPTVYPSVSFNL | Negative |
| P93543 | IHGAHPHTSAPPTVYPSVSF | Negative |
| P93543 | APPTVYPSVSFNLTEANSNE | Negative |
| P93543 | ICGLGIHGAHPHTSAPPTVY | Negative |
| P93543 | KVVATILYLVVLAICGLGIH | Negative |
| P93543 | PTHAPPTVYPSVSFNLTEA  | Negative |
| P93543 | HSAPPTVYPSVSFNLTEANS | Negative |
| P93543 | YLVVLAICGLGIHGAHPHTS | Negative |
| P93543 | TILYLVVLAICGLGIHGAHP | Negative |
| P93543 | ATILYLVVLAICGLGIHGAH | Negative |
| P93543 | LAICGLGIHGAHPHTSAPPT | Negative |
| P93543 | AHPHTSAPPTVYPSVSFNLT | Negative |
| P93543 | LVVLAICGLGIHGAHPHTSA | Negative |
| P93543 | SAPPTVYPSVSFNLTEANSN | Negative |
| P93543 | VATILYLVVLAICGLGIHGA | Negative |
| P93543 | GIHGAHPHTSAPPTVYPSVS | Negative |
| P93543 | PPTVYPSVSFNLTEANSNEY | Negative |
| P93543 | VLAICGLGIHGAHPHTSAPP | Negative |
| P93543 | VVATILYLVVLAICGLGIHG | Negative |
| P93543 | VVLAICGLGIHGAHPHTSAP | Negative |
| P93543 | ILYLVVLAICGLGIHGAHPT | Negative |
| P93543 | THSAPPTVYPSVSFNLTEAN | Negative |
| P93543 | LYLVVLAICGLGIHGAHPHT | Negative |
| P94127 | SAILAGTVGPAALSLGAAGL | Negative |

|        |                      |          |
|--------|----------------------|----------|
| P94127 | EHKGLSRRALFSATAGSAIL | Negative |
| P94127 | ESKEHKGLSRRALFSATAGS | Negative |
| P94127 | AGTVGPAALSLGAAGLATPA | Negative |
| P94127 | GLSRRALFSATAGSAILAGT | Negative |
| P94127 | LAGTVGPAALSLGAAGLATP | Negative |
| P94127 | SRRALFSATAGSAILAGTVG | Negative |
| P94127 | KGLSRRALFSATAGSAILAG | Negative |
| P94127 | GPAALSLGAAGLATPARAAT | Negative |
| P94127 | MESKEHKGLSRRALFSATAG | Negative |
| P94127 | GTVGPAALSLGAAGLATPAR | Negative |
| P94127 | GSAILAGTVGPAALSLGAAG | Negative |
| P94127 | VGPAALSLGAAGLATPARAA | Negative |
| P94127 | TAGSAILAGTVGPAALSLGA | Negative |
| P94127 | AGSAILAGTVGPAALSLGAA | Negative |
| P94127 | ALFSATAGSAILAGTVGPAA | Negative |
| P94127 | TVGPAALSLGAAGLATPARA | Negative |
| P94127 | ILAGTVGPAALSLGAAGLAT | Negative |
| P94127 | RRALFSATAGSAILAGTVGP | Negative |
| P94127 | LFSATAGSAILAGTVGPAAL | Negative |
| P94127 | FSATAGSAILAGTVGPAALS | Negative |
| P94127 | SKEHKGLSRRALFSATAGSA | Negative |
| P94127 | AILAGTVGPAALSLGAAGLA | Negative |
| P94127 | HKGLSRRALFSATAGSAILA | Negative |
| P94127 | PAALSLGAAGLATPARAATG | Negative |
| P94127 | KEHKGLSRRALFSATAGSAI | Negative |
| P94127 | SATAGSAILAGTVGPAALSL | Negative |
| P94127 | LSRRALFSATAGSAILAGTV | Negative |
| P94127 | ATAGSAILAGTVGPAALSLG | Negative |
| P94127 | RALFSATAGSAILAGTVGPA | Negative |
| P94356 | ATSKTSSSSKAETEKTYNIG | Negative |
| P94356 | NMIGGGGGSEATSKTSSSSK | Negative |
| P94356 | SEATSKTSSSSKAETEKTYN | Negative |
| P94356 | VVIIIIGNMIGGGGGSEATS | Negative |
| P94356 | EATSKTSSSSKAETEKTYNI | Negative |
| P94356 | ITFILAVVVIIIIGNMIGGG | Negative |
| P94356 | IGNMIGGGGGSEATSKTSSS | Negative |
| P94356 | LAVVVIIIIGNMIGGGGGSE | Negative |
| P94356 | ILAVVVIIIIGNMIGGGGGS | Negative |
| P94356 | GGGSEATSKTSSSSKAETEK | Negative |
| P94356 | AVVVIIIIGNMIGGGGGSEA | Negative |
| P94356 | GGGGSEATSKTSSSSKAETE | Negative |
| P94356 | GSEATSKTSSSSKAETEKTY | Negative |
| P94356 | GGGGGSEATSKTSSSSKAET | Negative |
| P94356 | MIGGGGGSEATSKTSSSSKA | Negative |
| P94356 | IGGGGGSEATSKTSSSSKAE | Negative |
| P94356 | VIIIIGNMIGGGGGSEATSK | Negative |

|        |                       |          |
|--------|-----------------------|----------|
| P94356 | IIGNMIGGGGGSEATSKTSS  | Negative |
| P94356 | IIIGNMIGGGGGSEATSKT   | Negative |
| P94356 | MRHKIITFILAVVVIIGN    | Negative |
| P94356 | GGSEATSKTSSSSKAETKT   | Negative |
| P94356 | VVVIIGNMIGGGGGSEAT    | Negative |
| P94356 | FILAVVVIIGNMIGGGGG    | Negative |
| P94356 | IITFILAVVVIIGNMIGG    | Negative |
| P94356 | HKIITFILAVVVIIGNMI    | Negative |
| P94356 | RHKIITFILAVVVIIGNM    | Negative |
| P94356 | GNMIGGGGGSEATSKTSSSS  | Negative |
| P94356 | TFILAVVVIIGNMIGGGG    | Negative |
| P94356 | KIITFILAVVVIIGNMIG    | Negative |
| P94421 | ALLFIALVTAVVISACGNQS  | Negative |
| P94421 | ACGNQSTSSKGSDTKKEQIT  | Negative |
| P94421 | TSSKGSDTKKEQITVKHQLD  | Negative |
| P94421 | IALVTAVVISACGNQSTSSK  | Negative |
| P94421 | TAVVISACGNQSTSSKGSdT  | Negative |
| P94421 | QSTSSKGSDTKKEQITVKHQ  | Negative |
| P94421 | SDTKKEQITVKHQLDKNGTK  | Negative |
| P94421 | MKKFALLFIALVTAVVISAC  | Negative |
| P94421 | SKGSDTKKEQITVKHQLDKN  | Negative |
| P94421 | LVTAVVISACGNQSTSSKGS  | Negative |
| P94421 | NQSTSSKGSDTKKEQITVKH  | Negative |
| P94421 | KKFALLFIALVTAVVISACG  | Negative |
| P94421 | SACGNQSTSSKGSDTKKEQI  | Negative |
| P94421 | LLFIALVTAVVISACGNQST  | Negative |
| P94421 | ALVTAVVISACGNQSTSSKG  | Negative |
| P94421 | GSDTKKEQITVKHQLDKNGT  | Negative |
| P94421 | LFIALVTAVVISACGNQSTS  | Negative |
| P94421 | VTAVVISACGNQSTSSKGSD  | Negative |
| P94421 | FALLFIALVTAVVISACGNQ  | Negative |
| P94421 | FIALVTAVVISACGNQSTSS  | Negative |
| P94421 | AVVISACGNQSTSSKGSDTK  | Negative |
| P94421 | VISACGNQSTSSKGSDTKKE  | Negative |
| P94421 | CGNQSTSSKGSDTKKEQITV  | Negative |
| P94421 | GNQSTSSKGSDTKKEQITVK  | Negative |
| P94421 | KGSDTKKEQITVKHQLDKNG  | Negative |
| P94421 | ISACGNQSTSSKGSDTKKEQ  | Negative |
| P94421 | KFALLFIALVTAVVISACGN  | Negative |
| P94421 | SSKGSDTKKEQITVKHQLDK  | Negative |
| P94421 | STSSKGSDTKKEQITVKHQL  | Negative |
| P94449 | FSLLLVLLPGKAFGAVDFPN  | Negative |
| P94449 | GAVDFPNTSTNGLLGFAAGNA | Negative |
| P94449 | SLLLVLPGKAFGAVDFPNT   | Negative |
| P94449 | FGAVDFPNTSTNGLLGFAAGN | Negative |
| P94449 | KRFCLWFAVFSLLLVLPGK   | Negative |

|        |                      |          |
|--------|----------------------|----------|
| P94449 | GKAFGAVDFPNTSTNGLLGF | Negative |
| P94449 | FAVFSLLLVLPGKAFGAVD  | Negative |
| P94449 | VLLPGKAFGAVDFPNTSTNG | Negative |
| P94449 | AVFSLLLVLPGKAFGAVDF  | Negative |
| P94449 | WFAVFSLLLVLPGKAFGAV  | Negative |
| P94449 | VDFPNTSTNGLLGFAGNAKN | Negative |
| P94449 | CLWFAVFSLLLVLPGKAFG  | Negative |
| P94449 | FCLWFAVFSLLLVLPGKAF  | Negative |
| P94449 | MKRFLWFAVFSLLLVLPG   | Negative |
| P94449 | PNTSTNGLLGFAGNAKNEKG | Negative |
| P94449 | LLVLLPGKAFGAVDFPNTS  | Negative |
| P94449 | LVLLPGKAFGAVDFPNTSTN | Negative |
| P94449 | RFCLWFAVFSLLLVLPGKA  | Negative |
| P94449 | PGKAFGAVDFPNTSTNGLL  | Negative |
| P94449 | LLVLLPGKAFGAVDFPNTST | Negative |
| P94449 | AFGAVDFPNTSTNGLLGFAG | Negative |
| P94449 | FPNTSTNGLLGFAGNAKNEK | Negative |
| P94449 | AVDFPNTSTNGLLGFAGNAK | Negative |
| P94449 | LPGKAFGAVDFPNTSTNGLL | Negative |
| P94449 | KAFGAVDFPNTSTNGLLGA  | Negative |
| P94449 | DFPNTSTNGLLGFAGNAKNE | Negative |
| P94449 | LLPGKAFGAVDFPNTSTNGL | Negative |
| P94449 | LWFAVFSLLLVLPGKAFGA  | Negative |
| P94449 | NTSTNGLLGFAGNAKNEKGI | Negative |
| P94522 | MKKKKTWKRFLHFSSAALAA | Negative |
| P94522 | TWKRFLHFSSAALAAGLIFT | Negative |
| P94522 | FTSAAPAEAAFWGASNELLH | Negative |
| P94522 | KTWKRFLHFSSAALAAGLIF | Negative |
| P94522 | AAGLIFTSAAPAEAAFWGAS | Negative |
| P94522 | KKTWKRFLHFSSAALAAGLI | Negative |
| P94522 | LIFTSAAPAEAAFWGASNEL | Negative |
| P94522 | AGLIFTSAAPAEAAFWGASN | Negative |
| P94522 | IFTSAAPAEAAFWGASNELL | Negative |
| P94522 | HFSSAALAAGLIFTSAAPAE | Negative |
| P94522 | SSAALAAGLIFTSAAPAEAA | Negative |
| P94522 | APAEAAFWGASNELLHDPTM | Negative |
| P94522 | TSAAPAEAAFWGASNELLHD | Negative |
| P94522 | AAPAEAAFWGASNELLHDPT | Negative |
| P94522 | KKKKTWKRFLHFSSAALAAG | Negative |
| P94522 | KRFLHFSSAALAAGLIFTSA | Negative |
| P94522 | KKKTWKRFLHFSSAALAAGL | Negative |
| P94522 | AEAAFWGASNELLHDPTMIK | Negative |
| P94522 | WKRFLHFSSAALAAGLIFTS | Negative |
| P94522 | GLIFTSAAPAEAAFWGASNE | Negative |
| P94522 | FSSAALAAGLIFTSAAPAEA | Negative |
| P94522 | ALAAGLIFTSAAPAEAAFWG | Negative |



|        |                      |          |
|--------|----------------------|----------|
| P94522 | AALAAGLIFTSAAPAEAAFW | Negative |
| P94522 | RFLHFSSAALAAGLIFTSAA | Negative |
| P94522 | SAALAAGLIFTSAAPAEAAF | Negative |
| P94522 | LHFSSAALAAGLIFTSAAPA | Negative |
| P94522 | SAAPAEAAFWGASNELLHDP | Negative |
| P94522 | PAEAAFWGASNELLHDPTMI | Negative |
| P94522 | FLHFSSAALAAGLIFTSAAP | Negative |
| P94691 | QAVPQVPADVVIDHLSNPNA | Negative |
| P94691 | AALVGTMAMAAQAVPQVPAD | Negative |
| P94691 | KLFSMLVAAALVGTMAMAAQ | Negative |
| P94691 | LVAAALVGTMAMAAQAVPQV | Negative |
| P94691 | QVPADVVIDHLSNPNAKLEY | Negative |
| P94691 | MAAQAVPQVPADVVIDHLSN | Negative |
| P94691 | AMAAQAVPQVPADVVIDHLS | Negative |
| P94691 | FSMLVAAALVGTMAMAAQAV | Negative |
| P94691 | AAALVGTMAMAAQAVPQVPA | Negative |
| P94691 | AAQAVPQVPADVVIDHLSNP | Negative |
| P94691 | PADVVIDHLSNPNAKLEYKV | Negative |
| P94691 | GTMAMAAQAVPQVPADVVID | Negative |
| P94691 | SMLVAAALVGTMAMAAQAVP | Negative |
| P94691 | MLVAAALVGTMAMAAQAVPQ | Negative |
| P94691 | ALVGTMAMAAQAVPQVPADV | Negative |
| P94691 | VPADVVIDHLSNPNAKLEYK | Negative |
| P94691 | PQVPADVVIDHLSNPNAKLE | Negative |
| P94691 | LVGTMAMAAQAVPQVPADV  | Negative |
| P94691 | VGTMAMAAQAVPQVPADVVI | Negative |
| P94691 | AVPQVPADVVIDHLSNPNAK | Negative |
| P94691 | MAMAAQAVPQVPADVVIDHL | Negative |
| P94691 | VPQVPADVVIDHLSNPNAKL | Negative |
| P94691 | ADVVIDHLSNPNAKLEYKVK | Negative |
| P94691 | AQAVPQVPADVVIDHLSNPN | Negative |
| P94691 | DVVIDHLSNPNAKLEYKVKF | Negative |
| P94691 | MKKLFSMLVAAALVGTMAMA | Negative |
| P94691 | KKLFSMLVAAALVGTMAMAA | Negative |
| P94691 | LFSMLVAAALVGTMAMAAQA | Negative |
| P94691 | TMAMAAQAVPQVPADVVIDH | Negative |
| P95470 | ALLCASLACGAKQVDVHDPV | Negative |
| P95470 | SWLSALALLCASLACGAKQV | Negative |
| P95470 | LCASLACGAKQVDVHDPVMT | Negative |
| P95470 | PTHHPITRQHWHSWLSALA  | Negative |
| P95470 | WHHSWLSALALLCASLACGA | Negative |
| P95470 | MPTHHPITRQHWHSWLSAL  | Negative |
| P95470 | HHPITRQHWHSWLSALALL  | Negative |
| P95470 | PITRQHWHSWLSALALLCA  | Negative |
| P95470 | TRQHWHSWLSALALLCASL  | Negative |
| P95470 | ALALLCASLACGAKQVDVHD | Negative |

|        |                       |          |
|--------|-----------------------|----------|
| P95470 | THHPITRQHWHSWLSALAL   | Negative |
| P95470 | ITRQHWHSWLSALALLCAS   | Negative |
| P95470 | HHSWLSALALLCASLACGAK  | Negative |
| P95470 | QHWHSWLSALALLCASLAC   | Negative |
| P95470 | WLSALALLCASLACGAKQVD  | Negative |
| P95470 | ACGAKQVDVHDPVMTREGDT  | Negative |
| P95470 | LACGAKQVDVHDPVMTREGD  | Negative |
| P95470 | ASLACGAKQVDVHDPVMTRE  | Negative |
| P95470 | GAKQVDVHDPVMTREGDTWY  | Negative |
| P95470 | HSWLSALALLCASLACGAKQ  | Negative |
| P95470 | SALALLCASLACGAKQVDVH  | Negative |
| P95470 | CGAKQVDVHDPVMTREGDTW  | Negative |
| P95470 | HPITRQHWHSWLSALALLC   | Negative |
| P95470 | CASLACGAKQVDVHDPVMTR  | Negative |
| P95470 | LLCASLACGAKQVDVHDPVM  | Negative |
| P95470 | RQHWHSWLSALALLCASLA   | Negative |
| P95470 | LALLCASLACGAKQVDVHDP  | Negative |
| P95470 | SLACGAKQVDVHDPVMTREG  | Negative |
| P95470 | HWHHSWLSALALLCASLACG  | Negative |
| P96156 | SVFTLSTLTASCLMAFNSYA  | Negative |
| P96156 | LTASCLMAFNSYAAVDCSAL  | Negative |
| P96156 | AKVSKSVFTLSTLTASCLMA  | Negative |
| P96156 | MAFNSYAAVDCSALA EWQSD | Negative |
| P96156 | SCLMAFNSYAAVDCSALA EW | Negative |
| P96156 | RAKVSKSVFTLSTLTASCLM  | Negative |
| P96156 | HRAKVSKSVFTLSTLTASCL  | Negative |
| P96156 | KSVFTLSTLTASCLMAFNSY  | Negative |
| P96156 | TLTASCLMAFNSYAAVDCSA  | Negative |
| P96156 | YAAVDCSALA EWQSDTIYTG | Negative |
| P96156 | VSKSVFTLSTLTASCLMAFN  | Negative |
| P96156 | LSTLTASCLMAFNSYAAVDC  | Negative |
| P96156 | FTLSTLTASCLMAFNSYAAV  | Negative |
| P96156 | LHRAKVSKSVFTLSTLTASC  | Negative |
| P96156 | ASCLMAFNSYAAVDCSALAE  | Negative |
| P96156 | FNSYAAVDCSALA EWQSDTI | Negative |
| P96156 | TLSTLTASCLMAFNSYAAVD  | Negative |
| P96156 | LMAFNSYAAVDCSALA EWQS | Negative |
| P96156 | SYAAVDCSALA EWQSDTIYT | Negative |
| P96156 | AAVDCSALA EWQSDTIYTGG | Negative |
| P96156 | TASCLMAFNSYAAVDCSALA  | Negative |
| P96156 | CLMAFNSYAAVDCSALA EWQ | Negative |
| P96156 | AFNSYAAVDCSALA EWQSDT | Negative |
| P96156 | RLHRAKVSKSVFTLSTLTAS  | Negative |
| P96156 | NSYAAVDCSALA EWQSDTIY | Negative |
| P96156 | MRLHRAKVSKSVFTLSTLTA  | Negative |
| P96156 | SKSVFTLSTLTASCLMAFNS  | Negative |

|        |                      |          |
|--------|----------------------|----------|
| P96156 | VFTLSTLTASCLMAFNSYAA | Negative |
| P96156 | KVSKSVFTLSTLTASCLMAF | Negative |
| P96729 | NKPTKLFSTLALAAGMTAAA | Negative |
| P96729 | GAGTIHAQQPETTVSIDDLY | Negative |
| P96729 | MNKPTKLFSTLALAAGMTAA | Negative |
| P96729 | KPTKLFSTLALAAGMTAAAA | Negative |
| P96729 | FSTLALAAGMTAAAAGGAGT | Negative |
| P96729 | KLFSTLALAAGMTAAAAGGA | Negative |
| P96729 | STLALAAGMTAAAAGGAGTI | Negative |
| P96729 | PTKLFSTLALAAGMTAAAAG | Negative |
| P96729 | TIHAQQPETTVSIDDLYSYP | Negative |
| P96729 | TAAAAGGAGTIHAQQPETTV | Negative |
| P96729 | AAAAGGAGTIHAQQPETTVS | Negative |
| P96729 | AAAGGAGTIHAQQPETTVSI | Negative |
| P96729 | LFSTLALAAGMTAAAAGGAG | Negative |
| P96729 | LALAAGMTAAAAGGAGTIHA | Negative |
| P96729 | AGTIHAQQPETTVSIDDLYS | Negative |
| P96729 | AAGMTAAAAGGAGTIHAQQP | Negative |
| P96729 | ALAAGMTAAAAGGAGTIHAQ | Negative |
| P96729 | HAQQPETTVSIDDLYSYPID | Negative |
| P96729 | AGGAGTIHAQQPETTVSIDD | Negative |
| P96729 | MTAAAAGGAGTIHAQQPETT | Negative |
| P96729 | IHAQQPETTVSIDDLYSYP  | Negative |
| P96729 | TLALAAGMTAAAAGGAGTIH | Negative |
| P96729 | AAGGAGTIHAQQPETTVSID | Negative |
| P96729 | GTIHAQQPETTVSIDDLYSY | Negative |
| P96729 | LAAGMTAAAAGGAGTIHAQQ | Negative |
| P96729 | AQQPETTVSIDDLYSYPIDS | Negative |
| P96729 | GGAGTIHAQQPETTVSIDDL | Negative |
| P96729 | TKLFSTLALAAGMTAAAAGG | Negative |
| P96729 | AGMTAAAAGGAGTIHAQQPE | Negative |
| P96740 | IAEADTSSELIVSEAKNLLG | Negative |
| P96740 | FLLVAVIICFLVPIMTKAEI | Negative |
| P96740 | ANWKKFLLVAVIICFLVPIM | Negative |
| P96740 | IMTKAEIAEADTSSELIVSE | Negative |
| P96740 | VIICFLVPIMTKAEIAEADT | Negative |
| P96740 | KFLLVAVIICFLVPIMTKAE | Negative |
| P96740 | EIAEADTSSELIVSEAKNLL | Negative |
| P96740 | FLVPIMTKAEIAEADTSSEL | Negative |
| P96740 | AVIICFLVPIMTKAEIAEAD | Negative |
| P96740 | IICFLVPIMTKAEIAEADTS | Negative |
| P96740 | LLVAVIICFLVPIMTKAEIA | Negative |
| P96740 | TKAEIAEADTSSELIVSEAK | Negative |
| P96740 | NWKKFLLVAVIICFLVPIMT | Negative |
| P96740 | LVPIMTKAEIAEADTSSELI | Negative |
| P96740 | AEADTSSELIVSEAKNLLGY | Negative |

|        |                      |          |
|--------|----------------------|----------|
| P96740 | VAVIICFLVPIMTKAEIAEA | Negative |
| P96740 | MTKAEIAEADTSSELIVSEA | Negative |
| P96740 | TLANWKKFLLVAVIICFLVP | Negative |
| P96740 | ICFLVPIMTKAEIAEADTSS | Negative |
| P96740 | AEIAEADTSSELIVSEAKNL | Negative |
| P96740 | KAEIAEADTSSELIVSEAKN | Negative |
| P96740 | LVAVIICFLVPIMTKAEIAE | Negative |
| P96740 | VPIMTKAEIAEADTSSELIV | Negative |
| P96740 | NTLANWKKFLLVAVIICFLV | Negative |
| P96740 | PIMTKAEIAEADTSSELIVS | Negative |
| P96740 | MNTLANWKKFLLVAVIICFL | Negative |
| P96740 | KKFLLVAVIICFLVPIMTKA | Negative |
| P96740 | WKKFLLVAVIICFLVPIMTK | Negative |
| P96740 | LANWKKFLLVAVIICFLVPI | Negative |
| P97430 | VEGGKNDAIKIGACPAKKPA | Negative |
| P97430 | LGILAPWTVEGGKNDAIKIG | Negative |
| P97430 | SCGLLPFTVLLALGILAPWT | Negative |
| P97430 | KNDAIKIGACPAKKPAQCLK | Negative |
| P97430 | EGGKNDAIKIGACPAKKPAQ | Negative |
| P97430 | DAIKIGACPAKKPAQCLKLE | Negative |
| P97430 | AIKIGACPAKKPAQCLKLEK | Negative |
| P97430 | KSCGLLPFTVLLALGILAPW | Negative |
| P97430 | PFTVLLALGILAPWTVEGGK | Negative |
| P97430 | GLLPFTVLLALGILAPWTVE | Negative |
| P97430 | ILAPWTVEGGKNDAIKIGAC | Negative |
| P97430 | NDAIKIGACPAKKPAQCLKL | Negative |
| P97430 | LAPWTVEGGKNDAIKIGACP | Negative |
| P97430 | TVEGGKNDAIKIGACPAKKP | Negative |
| P97430 | GKNDAIKIGACPAKKPAQCL | Negative |
| P97430 | ALGILAPWTVEGGKNDAIKI | Negative |
| P97430 | WTVEGGKNDAIKIGACPAKK | Negative |
| P97430 | MKSCGLLPFTVLLALGILAP | Negative |
| P97430 | LLALGILAPWTVEGGKNDAI | Negative |
| P97430 | CGLLPFTVLLALGILAPWTV | Negative |
| P97430 | APWTVEGGKNDAIKIGACPA | Negative |
| P97430 | GGKNDAIKIGACPAKKPAQC | Negative |
| P97430 | FTVLLALGILAPWTVEGGKN | Negative |
| P97430 | PWTVEGGKNDAIKIGACPAK | Negative |
| P97430 | LPFTVLLALGILAPWTVEGG | Negative |
| P97430 | GILAPWTVEGGKNDAIKIGA | Negative |
| P97430 | LALGILAPWTVEGGKNDAIK | Negative |
| P97430 | TVLLALGILAPWTVEGGKND | Negative |
| P97430 | LLPFTVLLALGILAPWTVEG | Negative |
| P97515 | GCQSAPQGTGLGFREVACDD | Negative |
| P97515 | LWGCQSAPQGTGLGFREVAC | Negative |
| P97515 | FTLLWGCQSAPQGTGLGFRE | Negative |

|        |                       |          |
|--------|-----------------------|----------|
| P97515 | GFREVACDDPEVEQVALTAV  | Negative |
| P97515 | TLVLLLCFTLLWGCQSAPQG  | Negative |
| P97515 | FREVACDDPEVEQVALTAVD  | Negative |
| P97515 | REVACDDPEVEQVALTAVDY  | Negative |
| P97515 | GTGLGFREVACDDPEVEQVA  | Negative |
| P97515 | TGLGFREVACDDPEVEQVAL  | Negative |
| P97515 | KTLVLLLCFTLLWGCQSAPQ  | Negative |
| P97515 | EVACDDPEVEQVALTAVDYL  | Negative |
| P97515 | APQGTGLGFREVACDDPEVE  | Negative |
| P97515 | VLLLCFTLLWGCQSAPQGTG  | Negative |
| P97515 | PQGTGLGFREVACDDPEVEQ  | Negative |
| P97515 | LGREVACDDPEVEQVALTA   | Negative |
| P97515 | LLLCFTLLWGCQSAPQGTGL  | Negative |
| P97515 | TLLWGCQSAPQGTGLGFREV  | Negative |
| P97515 | LLCFTLLWGCQSAPQGTGLG  | Negative |
| P97515 | MKTLVLLLCFTLLWGCQSAP  | Negative |
| P97515 | LLWGCQSAPQGTGLGFREVA  | Negative |
| P97515 | CQSAPQGTGLGFREVACDDP  | Negative |
| P97515 | VACDDPEVEQVALTAVDYLN  | Negative |
| P97515 | GLGFREVACDDPEVEQVALT  | Negative |
| P97515 | CFTLLWGCQSAPQGTGLGFR  | Negative |
| P97515 | WGCQSAPQGTGLGFREVACD  | Negative |
| P97515 | SAPQGTGLGFREVACDDPEV  | Negative |
| P97515 | QSAPQGTGLGFREVACDDPE  | Negative |
| P97515 | LCFTLLWGCQSAPQGTGLGF  | Negative |
| P97515 | QGTGLGFREVACDDPEVEQV  | Negative |
| P97535 | WLSIGRSGNVPPTTQPKCTD  | Negative |
| P97535 | PGLWGTCFWLWGSLLWLSIG  | Negative |
| P97535 | WGSLLWLSIGRSGNVPPTTQ  | Negative |
| P97535 | PTTQPKCTDFQSANLLRGTN  | Negative |
| P97535 | RSGNVPPTTQPKCTDFQSAN  | Negative |
| P97535 | IGRSGNVPPTTQPKCTDFQS  | Negative |
| P97535 | LWGTCFWLWGSLLWLSIGRS  | Negative |
| P97535 | GSELLWLSIGRSGNVPPTTQP | Negative |
| P97535 | WLWGSLLWLSIGRSGNVPPT  | Negative |
| P97535 | GNVPPTTQPKCTDFQSANLL  | Negative |
| P97535 | LWGSLLWLSIGRSGNVPPTT  | Negative |
| P97535 | SGNVPPTTQPKCTDFQSANL  | Negative |
| P97535 | PPTTQPKCTDFQSANLLRGT  | Negative |
| P97535 | VPPTTQPKCTDFQSANLLRG  | Negative |
| P97535 | WGTCFWLWGSLLWLSIGRSG  | Negative |
| P97535 | NVPPTTQPKCTDFQSANLLR  | Negative |
| P97535 | LSIGRSGNVPPTTQPKCTDF  | Negative |
| P97535 | CFWLWGSLLWLSIGRSGNVP  | Negative |
| P97535 | LWLSIGRSGNVPPTTQPKCT  | Negative |
| P97535 | GTCFWLWGSLLWLSIGRSGN  | Negative |

|        |                       |          |
|--------|-----------------------|----------|
| P97535 | CPGLWGTCFWLWGSLLWLSI  | Negative |
| P97535 | LLWLSIGRSGNVPPTTQPKC  | Negative |
| P97535 | SIGRSGNVPPTTQPKCTDFQ  | Negative |
| P97535 | TTQPKCTDFQSANLLRGTNL  | Negative |
| P97535 | MCPGLWGTCFWLWGSLLWLS  | Negative |
| P97535 | GLWGTCFWLWGSLLWLSIGR  | Negative |
| P97535 | GRSGNVPPTTQPKCTDFQSA  | Negative |
| P97535 | SLLWLSIGRSGNVPPTTQPK  | Negative |
| P97535 | TCFWLWGSLLWLSIGRSGNV  | Negative |
| P97884 | QSEAASNFDCCCLTYTKNVYH | Negative |
| P97884 | LALAGVLLAYLCSQSEAASN  | Negative |
| P97884 | AASNFDCCCLTYTKNVYHHAR | Negative |
| P97884 | DCCLTYTKNVYHHARNFVGF  | Negative |
| P97884 | CKHLPFLALAGVLLAYLCSQ  | Negative |
| P97884 | SEAASNFDCCCLTYTKNVYHH | Negative |
| P97884 | FDCCLTYTKNVYHHARNFVG  | Negative |
| P97884 | YLCSQSEAASNFDCCCLTYTK | Negative |
| P97884 | NFDCCCLTYTKNVYHHARNFV | Negative |
| P97884 | ASNFDCCCLTYTKNVYHHARN | Negative |
| P97884 | FLALAGVLLAYLCSQSEAAS  | Negative |
| P97884 | ACKHLPFLALAGVLLAYLCS  | Negative |
| P97884 | LAGVLLAYLCSQSEAASNFD  | Negative |
| P97884 | LAYLCSQSEAASNFDCCCLTY | Negative |
| P97884 | CSQSEAASNFDCCCLTYTKNV | Negative |
| P97884 | KHLPFLALAGVLLAYLCSQS  | Negative |
| P97884 | GVLLAYLCSQSEAASNFDCC  | Negative |
| P97884 | VLLAYLCSQSEAASNFDCCCL | Negative |
| P97884 | SQSEAASNFDCCCLTYTKNVY | Negative |
| P97884 | HLPFLALAGVLLAYLCSQSE  | Negative |
| P97884 | ALAGVLLAYLCSQSEAASNFD | Negative |
| P97884 | LLAYLCSQSEAASNFDCCCLT | Negative |
| P97884 | PFLALAGVLLAYLCSQSEAA  | Negative |
| P97884 | MACKHLPFLALAGVLLAYLC  | Negative |
| P97884 | EAASNFDCCCLTYTKNVYHHA | Negative |
| P97884 | LPFLALAGVLLAYLCSQSEA  | Negative |
| P97884 | AYLCSQSEAASNFDCCCLTYT | Negative |
| P97884 | LCSQSEAASNFDCCCLTYTKN | Negative |
| P97884 | SNFDCCCLTYTKNVYHHARNF | Negative |
| P98066 | FLLLWEDTQGWGFKDGIFHN  | Negative |
| P98066 | SIWLERAAGVYHREARSGKY  | Negative |
| P98066 | IWLERAAGVYHREARSGKYK  | Negative |
| P98066 | HNSIWLERAAGVYHREARSG  | Negative |
| P98066 | LIYLFLLLWEDTQGWGFKDG  | Negative |
| P98066 | YLFLLLWEDTQGWGFKDGIF  | Negative |
| P98066 | MIILYLFLLLWEDTQGWGF   | Negative |
| P98066 | GWGFKDGIFHNSIWLERAAG  | Negative |

|        |                       |          |
|--------|-----------------------|----------|
| P98066 | WLERAAAGVYHREARSGKYKL | Negative |
| P98066 | TQGWGFKDGIFHNSIWLERA  | Negative |
| P98066 | IYLFLLWEDTQGWGFKDGI   | Negative |
| P98066 | DGIFHNSIWLERAAGVYHRE  | Negative |
| P98066 | LLLWEDTQGWGFKDGIFHNS  | Negative |
| P98066 | LFLLWEDTQGWGFKDGIFH   | Negative |
| P98066 | LLWEDTQGWGFKDGIFHNSI  | Negative |
| P98066 | WEDTQGWGFKDGIFHNSIWL  | Negative |
| P98066 | EDTQGWGFKDGIFHNSIWLE  | Negative |
| P98066 | IILIYLFLLWEDTQGWGFK   | Negative |
| P98066 | FKDGIFHNSIWLERAAGVYH  | Negative |
| P98066 | DTQGWGFKDGIFHNSIWLER  | Negative |
| P98066 | QGWGFKDGIFHNSIWLERAA  | Negative |
| P98066 | GFKDGIFHNSIWLERAAGVY  | Negative |
| P98066 | FHNSIWLERAAGVYHREARS  | Negative |
| P98066 | KDGIFHNSIWLERAAGVYHR  | Negative |
| P98066 | IFHNSIWLERAAGVYHREAR  | Negative |
| P98066 | LWEDTQGWGFKDGIFHNSIW  | Negative |
| P98066 | GIFHNSIWLERAAGVYHREA  | Negative |
| P98066 | WGFKDGIFHNSIWLERAAGV  | Negative |
| P98066 | NSIWLERAAGVYHREARSGK  | Negative |
| P98140 | KGPKKHKLTDSEHTVVLTVT  | Negative |
| P98140 | TPPWKGPKKKHKLTDSEHTVV | Negative |
| P98140 | STVSTPPWKGPKKKHKLTDSE | Negative |
| P98140 | RALLLGALLVSLESTVSTP   | Negative |
| P98140 | VSLESTVSTPPWKGPKKKHKL | Negative |
| P98140 | KLTDSEHTVVLTVTGEPCFH  | Negative |
| P98140 | TVSTPPWKGPKKKHKLTDSEH | Negative |
| P98140 | GALLVSLESTVSTPPWKGPK  | Negative |
| P98140 | ALLLGALLVSLESTVSTPP   | Negative |
| P98140 | KHKLTDSEHTVVLTVTGEPC  | Negative |
| P98140 | ALLVSLESTVSTPPWKGPKK  | Negative |
| P98140 | STPPWKGPKKKHKLTDSEHTV | Negative |
| P98140 | VSTPPWKGPKKKHKLTDSEHT | Negative |
| P98140 | LGALLVSLESTVSTPPWKG   | Negative |
| P98140 | LLLGALLVSLESTVSTPPW   | Negative |
| P98140 | PWKGPKKKHKLTDSEHTVVL  | Negative |
| P98140 | LESTVSTPPWKGPKKKHKLTD | Negative |
| P98140 | KKHKLTDSEHTVVLTVTGE   | Negative |
| P98140 | LVSLESTVSTPPWKGPKKKHK | Negative |
| P98140 | WKGPKKKHKLTDSEHTVVLTV | Negative |
| P98140 | SLESTVSTPPWKGPKKKHKLT | Negative |
| P98140 | PKKKHKLTDSEHTVVLTVTGE | Negative |
| P98140 | GPKKKHKLTDSEHTVVLTVTG | Negative |
| P98140 | ESTVSTPPWKGPKKKHKLTDS | Negative |
| P98140 | LLGALLVSLESTVSTPPWKG  | Negative |

|        |                      |          |
|--------|----------------------|----------|
| P98140 | HKLTDSEHTVVLTVTGEPCH | Negative |
| P98140 | LLVSLESTVSTPPWKGPKKH | Negative |
| P98140 | MRALLLLGALLVSLESTVST | Negative |
| P98140 | PPWKGPKKHKLTDSEHTVVL | Negative |
| P98184 | VTEDVDINFLIGATGATYK  | Negative |
| P98184 | YVGAHVTEVDINFLIGAT   | Negative |
| P98184 | LYVGAHVTEVDINFLIGA   | Negative |
| P98184 | GATGATYKTFIRNLRTKLTV | Negative |
| P98184 | FYSVLALYVGAHVTEVDIN  | Negative |
| P98184 | ALYVGAHVTEVDINFLIG   | Negative |
| P98184 | DINFLIGATGATYKTFIRN  | Negative |
| P98184 | GAHVTEVDINFLIGATGA   | Negative |
| P98184 | VGAHVTEVDINFLIGATG   | Negative |
| P98184 | LALYVGAHVTEVDINFLI   | Negative |
| P98184 | DVDINFLIGATGATYKTFI  | Negative |
| P98184 | VDINFLIGATGATYKTFIR  | Negative |
| P98184 | MRSIGFYSVLALYVGAHVTE | Negative |
| P98184 | IGFYSVLALYVGAHVTEVD  | Negative |
| P98184 | HVTEVDINFLIGATGATY   | Negative |
| P98184 | LIGATGATYKTFIRNLRTKL | Negative |
| P98184 | GFYSVLALYVGAHVTEVDI  | Negative |
| P98184 | NFLIGATGATYKTFIRNLR  | Negative |
| P98184 | SVLALYVGAHVTEVDINFS  | Negative |
| P98184 | EDVDINFLIGATGATYKTF  | Negative |
| P98184 | SLIGATGATYKTFIRNLRTK | Negative |
| P98184 | FSLIGATGATYKTFIRNLRT | Negative |
| P98184 | IGATGATYKTFIRNLRTKLT | Negative |
| P98184 | SIGFYSVLALYVGAHVTEVD | Negative |
| P98184 | VLALYVGAHVTEVDINFL   | Negative |
| P98184 | TEDVDINFLIGATGATYKT  | Negative |
| P98184 | RSIGFYSVLALYVGAHVTE  | Negative |
| P98184 | AHVTEVDINFLIGATGAT   | Negative |
| P98184 | INFLIGATGATYKTFIRNL  | Negative |
| P9WG65 | VAIAVVLMFGLANTPRAVAA | Negative |
| P9WG65 | LANTPRAVAADERLQFTATT | Negative |
| P9WG65 | ADGIVAVAIAVVLMFGLANT | Negative |
| P9WG65 | RLVSPIKAFADGIVAVAI   | Negative |
| P9WG65 | GLANTPRAVAADERLQFTAT | Negative |
| P9WG65 | IVAVAIAVVLMFGLANTPRA | Negative |
| P9WG65 | MFGLANTPRAVAADERLQFT | Negative |
| P9WG65 | FGLANTPRAVAADERLQFTA | Negative |
| P9WG65 | VVLMFGLANTPRAVAADERL | Negative |
| P9WG65 | MSLRLVSPKAFADGIVAVA  | Negative |
| P9WG65 | AFADGIVAVAIAVVLMFGLA | Negative |
| P9WG65 | IKAFADGIVAVAIAVVLMFG | Negative |
| P9WG65 | SPIKAFADGIVAVAIAVVLM | Negative |



|        |                       |          |
|--------|-----------------------|----------|
| P9WG65 | AVVLMFGLANTPRAVAADER  | Negative |
| P9WG65 | IAVVLMFGLANTPRAVADE   | Negative |
| P9WG65 | GIVAVAIHAVVLMFGLANTPR | Negative |
| P9WG65 | AIHAVVLMFGLANTPRAAAD  | Negative |
| P9WG65 | LVSPIKAFADGIVAVAIHV   | Negative |
| P9WG65 | AVAIHAVVLMFGLANTPRAVA | Negative |
| P9WG65 | VAVAIHAVVLMFGLANTPRAV | Negative |
| P9WG65 | SLRLVSPIKAFADGIVAVAI  | Negative |
| P9WG65 | LRLVSPIKAFADGIVAVAI   | Negative |
| P9WG65 | LMFGLANTPRAVAADERLQF  | Negative |
| P9WG65 | PIKAFADGIVAVAIHAVVLMF | Negative |
| P9WG65 | ANTPRAVAADERLQFTATTL  | Negative |
| P9WG65 | VSPIKAFADGIVAVAIHV    | Negative |
| P9WG65 | DGIVAVAIHAVVLMFGLANTP | Negative |
| P9WG65 | FADGIVAVAIHAVVLMFGLAN | Negative |
| P9WG65 | KAFADGIVAVAIHAVVLMFGL | Negative |
| P9WIP1 | AAPVALAAYPITGKLGSELT  | Negative |
| P9WIP1 | VVAMAAIATFAAPVALAAYP  | Negative |
| P9WIP1 | VAVVAMAAIATFAAPVALAA  | Negative |
| P9WIP1 | VAMAAIATFAAPVALAAYPI  | Negative |
| P9WIP1 | ALAAYPITGKLGSELTMDDT  | Negative |
| P9WIP1 | AVAVVAMAAIATFAAPVALA  | Negative |
| P9WIP1 | VALAAYPITGKLGSELMTD   | Negative |
| P9WIP1 | APVALAAYPITGKLGSELTMT | Negative |
| P9WIP1 | AYPITGKLGSELMTDDTVGQ  | Negative |
| P9WIP1 | KLTTMIKTAVAVVAMAAIAT  | Negative |
| P9WIP1 | TAVAVVAMAAIATFAAPVAL  | Negative |
| P9WIP1 | IKTAVAVVAMAAIATFAAPV  | Negative |
| P9WIP1 | TMIKTAVAVVAMAAIATFAA  | Negative |
| P9WIP1 | LTTMIKTAVAVVAMAAIATF  | Negative |
| P9WIP1 | AIATFAAPVALAAYPITGKL  | Negative |
| P9WIP1 | PVALAAYPITGKLGSELTMT  | Negative |
| P9WIP1 | ATFAAPVALAAYPITGKLGS  | Negative |
| P9WIP1 | MAAIATFAAPVALAAYPITG  | Negative |
| P9WIP1 | AVVAMAAIATFAAPVALAAY  | Negative |
| P9WIP1 | MIKTAVAVVAMAAIATFAAP  | Negative |
| P9WIP1 | MKLTTMIKTAVAVVAMAAIA  | Negative |
| P9WIP1 | TFAAPVALAAYPITGKLGE   | Negative |
| P9WIP1 | TTMIKTAVAVVAMAAIATFA  | Negative |
| P9WIP1 | AAIATFAAPVALAAYPITGK  | Negative |
| P9WIP1 | AAYPITGKLGSELTMTDDTVG | Negative |
| P9WIP1 | IATFAAPVALAAYPITGKLG  | Negative |
| P9WIP1 | FAAPVALAAYPITGKLGESE  | Negative |
| P9WIP1 | LAAYPITGKLGSELTMTDDTV | Negative |
| P9WIP1 | KTAVAVVAMAAIATFAAPVA  | Negative |
| P9WIR7 | LTVAVPATANADPEPAPPV   | Negative |

|        |                      |          |
|--------|----------------------|----------|
| P9WIR7 | HQVDPNLTRRKGRLAALAIA | Negative |
| P9WIR7 | IAAMASASLVTVAVPATANA | Negative |
| P9WIR7 | AAMASASLVTVAVPATANAD | Negative |
| P9WIR7 | VDPNLTRRKGRLAALAIAAM | Negative |
| P9WIR7 | QVDPNLTRRKGRLAALAIAA | Negative |
| P9WIR7 | AMASASLVTVAVPATANADP | Negative |
| P9WIR7 | TRRKGRLAALAIAAMASASL | Negative |
| P9WIR7 | PNLTRRKGRLAALAIAAMAS | Negative |
| P9WIR7 | LAIAAMASASLVTVAVPATA | Negative |
| P9WIR7 | ASASLVTVAVPATANADPEP | Negative |
| P9WIR7 | MHQVDPNLTRRKGRLAALAI | Negative |
| P9WIR7 | SLVTVAVPATANADPEPAPP | Negative |
| P9WIR7 | GRLAALAIAAMASASLVTVA | Negative |
| P9WIR7 | ALAIAAMASASLVTVAVPAT | Negative |
| P9WIR7 | VTVAVPATANADPEPAPPVP | Negative |
| P9WIR7 | RLAALAIAAMASASLVTVAV | Negative |
| P9WIR7 | MASASLVTVAVPATANADPE | Negative |
| P9WIR7 | TVAVPATANADPEPAPPVPT | Negative |
| P9WIR7 | RKGRLAALAIAAMASASLVT | Negative |
| P9WIR7 | ASLVTVAVPATANADPEPAP | Negative |
| P9WIR7 | RRKGRLAALAIAAMASASLV | Negative |
| P9WIR7 | AALAIAAMASASLVTVAVPA | Negative |
| P9WIR7 | KGRLAALAIAAMASASLVTV | Negative |
| P9WIR7 | LAALAIAAMASASLVTVAVP | Negative |
| P9WIR7 | AIAAMASASLVTVAVPATAN | Negative |
| P9WIR7 | NLTRRKGRLAALAIAAMASA | Negative |
| P9WIR7 | DPNLTRRKGRLAALAIAAMA | Negative |
| P9WIR7 | LTRRKGRLAALAIAAMASAS | Negative |
| Q00017 | LPSALATTVYLAGDSTMAKN | Negative |
| Q00017 | KTAALAPLFFLPSALATTVY | Negative |
| Q00017 | AGDSTMAKNGGSGTNGWGE  | Negative |
| Q00017 | TMAKNGGSGTNGWGEYLAS  | Negative |
| Q00017 | DSTMAKNGGSGTNGWGEYL  | Negative |
| Q00017 | LAGDSTMAKNGGSGTNGWG  | Negative |
| Q00017 | ALAPLFFLPSALATTVYLAG | Negative |
| Q00017 | APLFFLPSALATTVYLAGDS | Negative |
| Q00017 | FLPSALATTVYLAGDSTMAK | Negative |
| Q00017 | FFLPSALATTVYLAGDSTMA | Negative |
| Q00017 | YLAGDSTMAKNGGSGTNGW  | Negative |
| Q00017 | TTVYLAGDSTMAKNGGSGT  | Negative |
| Q00017 | TVYLAGDSTMAKNGGSGTN  | Negative |
| Q00017 | LAPLFFLPSALATTVYLAGD | Negative |
| Q00017 | KNGGGSGTNGWGEYLASYS  | Negative |
| Q00017 | LATTVYLAGDSTMAKNGGGS | Negative |
| Q00017 | VYLAGDSTMAKNGGSGTNG  | Negative |
| Q00017 | MAKNGGSGTNGWGEYLAS   | Negative |

|        |                       |          |
|--------|-----------------------|----------|
| Q00017 | MKTAALAPLFFLPSALATTV  | Negative |
| Q00017 | SALATTVYLAGDSTMAKNGG  | Negative |
| Q00017 | ATTVYLAGDSTMAKNGGGSG  | Negative |
| Q00017 | AKNGGGSGTNGWGEYLA SYL | Negative |
| Q00017 | PSALATTVYLAGDSTMAKNG  | Negative |
| Q00017 | AALAPLFFLPSALATTVYLA  | Negative |
| Q00017 | PLFFLPSALATTVYLAGDST  | Negative |
| Q00017 | LFFLPSALATTVYLAGDSTM  | Negative |
| Q00017 | ALATTVYLAGDSTMAKNGGG  | Negative |
| Q00017 | GDSTMAKNGGGSGTNGWGEY  | Negative |
| Q00017 | STMAKNGGGSGTNGWGEYLA  | Negative |
| Q00293 | AFSRSREAAACGPKKPFRLP  | Negative |
| Q00293 | LGLLALGATAEAFSRSREAA  | Negative |
| Q00293 | LTHVLSHTLGLLALGATAEA  | Negative |
| Q00293 | RSREAAACGPKKPFRLPTSQ  | Negative |
| Q00293 | HVLSHTLGLLALGATAEAFS  | Negative |
| Q00293 | TAEAFSRSREAAACGPKKPF  | Negative |
| Q00293 | FSRSREAAACGPKKPFRLPT  | Negative |
| Q00293 | RLTHVLSHTLGLLALGATAE  | Negative |
| Q00293 | VLSHTLGLLALGATAEAFSR  | Negative |
| Q00293 | ALGATAEAFSRSREAAACGPK | Negative |
| Q00293 | AEAFSRSREAAACGPKKPF   | Negative |
| Q00293 | ATAEAFSRSREAAACGPKKPF | Negative |
| Q00293 | LLALGATAEAFSRSREAAACG | Negative |
| Q00293 | ACGPKKPFRLPTSQSRDKT   | Negative |
| Q00293 | HTLGLLALGATAEAFSRSRE  | Negative |
| Q00293 | LALGATAEAFSRSREAAACGP | Negative |
| Q00293 | REAAACGPKKPFRLPTSQSR  | Negative |
| Q00293 | SRSREAAACGPKKPFRLPTS  | Negative |
| Q00293 | EAACGPKKPFRLPTSQSRD   | Negative |
| Q00293 | EAFSRSREAAACGPKKPFRL  | Negative |
| Q00293 | LSHTLGLLALGATAEAFSRS  | Negative |
| Q00293 | LGATAEAFSRSREAAACGPKK | Negative |
| Q00293 | GATAEAFSRSREAAACGPKK  | Negative |
| Q00293 | TLGLLALGATAEAFSRSREA  | Negative |
| Q00293 | THVLSHTLGLLALGATAEAF  | Negative |
| Q00293 | SREAAACGPKKPFRLPTSQS  | Negative |
| Q00293 | AACGPKKPFRLPTSQSRDK   | Negative |
| Q00293 | GLLALGATAEAFSRSREAAAC | Negative |
| Q00293 | MRLTHVLSHTLGLLALGATA  | Negative |
| Q00855 | EIKKVMVDGCHGSDPCIIHR  | Negative |
| Q00855 | IKKVMVDGCHGSDPCIIHRG  | Negative |
| Q00855 | LVAADVADQVDVKDCANNEI  | Negative |
| Q00855 | DVKDCANNEIKKVMVDGCHG  | Negative |
| Q00855 | VAAVVADQVDVKDCANNEIK  | Negative |
| Q00855 | AAVVADQVDVKDCANNEIKK  | Negative |

|        |                      |          |
|--------|----------------------|----------|
| Q00855 | ADQVDVKDCANNEIKKVMVD | Negative |
| Q00855 | VVADQVDVKDCANNEIKKVM | Negative |
| Q00855 | QVDVKDCANNEIKKVMVDGC | Negative |
| Q00855 | LCLSLLVAAVVADQVDVKDC | Negative |
| Q00855 | ILCLSLLVAAVVADQVDVKD | Negative |
| Q00855 | AVVADQVDVKDCANNEIKKV | Negative |
| Q00855 | SLLVAAVVADQVDVKDCANN | Negative |
| Q00855 | NEIKKVMVDGCHGSDPCIIH | Negative |
| Q00855 | KDCANNEIKKVMVDGCHGSD | Negative |
| Q00855 | VADQVDVKDCANNEIKKVMV | Negative |
| Q00855 | ISKILCLSLLVAAVVADQVD | Negative |
| Q00855 | VKDCANNEIKKVMVDGCHGS | Negative |
| Q00855 | LSLLVAAVVADQVDVKDCAN | Negative |
| Q00855 | KILCLSLLVAAVVADQVDVK | Negative |
| Q00855 | DCANNEIKKVMVDGCHGSDP | Negative |
| Q00855 | CLSLLVAAVVADQVDVKDCA | Negative |
| Q00855 | ANNEIKKVMVDGCHGSDPCI | Negative |
| Q00855 | DQVDVKDCANNEIKKVMVDG | Negative |
| Q00855 | LLVAAVVADQVDVKDCANNE | Negative |
| Q00855 | MISKILCLSLLVAAVVADQV | Negative |
| Q00855 | CANNEIKKVMVDGCHGSDPC | Negative |
| Q00855 | VDVKDCANNEIKKVMVDGCH | Negative |
| Q00855 | NNEIKKVMVDGCHGSDPCII | Negative |
| Q00870 | PKQYSFKPEDAETIWNGDIP | Negative |
| Q00870 | VLVAGVVAVSAALASKHPKQ | Negative |
| Q00870 | YSFKPEDAETIWNGDIPVLY | Negative |
| Q00870 | AVSAALASKHPKQYSFKPED | Negative |
| Q00870 | MISSVLVAGVVAVSAALASK | Negative |
| Q00870 | SFKPEDAETIWNGDIPVLYD | Negative |
| Q00870 | VAGVVAVSAALASKHPKQYS | Negative |
| Q00870 | KQYSFKPEDAETIWNGDIPV | Negative |
| Q00870 | KPEDAETIWNGDIPVLYDFG | Negative |
| Q00870 | VSAALASKHPKQYSFKPEDA | Negative |
| Q00870 | LVAGVVAVSAALASKHPKQY | Negative |
| Q00870 | VVAVSAALASKHPKQYSFKP | Negative |
| Q00870 | SSVLVAGVVAVSAALASKHP | Negative |
| Q00870 | ISSVLVAGVVAVSAALASKH | Negative |
| Q00870 | SAALASKHPKQYSFKPEDAE | Negative |
| Q00870 | MMISSVLVAGVVAVSAALAS | Negative |
| Q00870 | ASKHPKQYSFKPEDAETIWN | Negative |
| Q00870 | AGVVAVSAALASKHPKQYSF | Negative |
| Q00870 | QYSFKPEDAETIWNGDIPVL | Negative |
| Q00870 | PEDAETIWNGDIPVLYDFGD | Negative |
| Q00870 | LASKHPKQYSFKPEDAETIW | Negative |
| Q00870 | AALASKHPKQYSFKPEDAET | Negative |
| Q00870 | FKPEDAETIWNGDIPVLYDF | Negative |

|        |                       |          |
|--------|-----------------------|----------|
| Q00870 | VAVSAALASKHPKQYSFKPE  | Negative |
| Q00870 | KHPKQYSFKPEDAETIWNGD  | Negative |
| Q00870 | SKHPKQYSFKPEDAETIWNG  | Negative |
| Q00870 | GVVAVSAALASKHPKQYSFK  | Negative |
| Q00870 | HPKQYSFKPEDAETIWNGDI  | Negative |
| Q00870 | ALASKHPKQYSFKPEDAETI  | Negative |
| Q00901 | LSAGVIAPVTTSIVQSPQKC  | Negative |
| Q00901 | SILCLVLSAGVIAPVTTSIV  | Negative |
| Q00901 | TTSIVQSPQKCYACTVDKGS  | Negative |
| Q00901 | VTTTSIVQSPQKCYACTVDKG | Negative |
| Q00901 | SIVQSPQKCYACTVDKGSYA  | Negative |
| Q00901 | PVTTSIVQSPQKCYACTVDK  | Negative |
| Q00901 | QKCYACTVDKGSYADTFTEF  | Negative |
| Q00901 | IVQSPQKCYACTVDKGSYAD  | Negative |
| Q00901 | MKGIRKSILCLVLSAGVIAP  | Negative |
| Q00901 | KSILCLVLSAGVIAPVTTSI  | Negative |
| Q00901 | GVIAPVTTSIVQSPQKCYAC  | Negative |
| Q00901 | LVLSAGVIAPVTTSIVQSPQ  | Negative |
| Q00901 | IRKSILCLVLSAGVIAPVTT  | Negative |
| Q00901 | IAPVTTSIVQSPQKCYACTV  | Negative |
| Q00901 | APVTTSIVQSPQKCYACTVD  | Negative |
| Q00901 | AGVIAPVTTSIVQSPQKCYA  | Negative |
| Q00901 | PQKCYACTVDKGSYADTFTE  | Negative |
| Q00901 | CLVLSAGVIAPVTTSIVQSP  | Negative |
| Q00901 | SPQKCYACTVDKGSYADTFT  | Negative |
| Q00901 | VLSAGVIAPVTTSIVQSPQK  | Negative |
| Q00901 | GIRKSILCLVLSAGVIAPVT  | Negative |
| Q00901 | QSPQKCYACTVDKGSYADTF  | Negative |
| Q00901 | LCLVLSAGVIAPVTTSIVQS  | Negative |
| Q00901 | TSIVQSPQKCYACTVDKGSY  | Negative |
| Q00901 | ILCLVLSAGVIAPVTTSIVQ  | Negative |
| Q00901 | VIAPVTTSIVQSPQKCYACT  | Negative |
| Q00901 | SAGVIAPVTTSIVQSPQKCY  | Negative |
| Q00901 | KGIRKSILCLVLSAGVIAPV  | Negative |
| Q00901 | RKSILCLVLSAGVIAPVTTS  | Negative |
| Q00945 | TAAVLSLSLTDACFIRNCPK  | Negative |
| Q00945 | PLTYLLTAAVLSLSLTDACF  | Negative |
| Q00945 | RNCPKGGKRSLDTGMVTSRE  | Negative |
| Q00945 | LTAAVLSLSLTDACFIRNCP  | Negative |
| Q00945 | MMSSLCGMPLTYLLTAAVLS  | Negative |
| Q00945 | FIRNCPKGGKRSLDTGMVTS  | Negative |
| Q00945 | SSLCGMPLTYLLTAAVLSLS  | Negative |
| Q00945 | ACFIRNCPKGGKRSLDTGMV  | Negative |
| Q00945 | TDACFIRNCPKGGKRSLDTG  | Negative |
| Q00945 | LTYLLTAAVLSLSLTDACFI  | Negative |
| Q00945 | TYLLTAAVLSLSLTDACFIR  | Negative |

|        |                      |          |
|--------|----------------------|----------|
| Q00945 | SLCGMPLTYLLTAAVLSLSL | Negative |
| Q00945 | MSSLCGMPLTYLLTAAVLSL | Negative |
| Q00945 | GMPLTYLLTAAVLSLSLTD  | Negative |
| Q00945 | AVLSLSLTDACFIRNCPKGG | Negative |
| Q00945 | LSLSLTDACFIRNCPKGGKR | Negative |
| Q00945 | SLTDACFIRNCPKGGKRSLD | Negative |
| Q00945 | LSLTDACFIRNCPKGGKRSL | Negative |
| Q00945 | CGMPLTYLLTAAVLSLSLTD | Negative |
| Q00945 | AAVLSLSLTDACFIRNCPKG | Negative |
| Q00945 | IRNCPKGGKRSLDTGMVTSR | Negative |
| Q00945 | MPLTYLLTAAVLSLSLTDAC | Negative |
| Q00945 | LLTAAVLSLSLTDACFIRNC | Negative |
| Q00945 | LTDACFIRNCPKGGKRSLDT | Negative |
| Q00945 | LCGMPLTYLLTAAVLSLSLT | Negative |
| Q00945 | DACFIRNCPKGGKRSLDTGM | Negative |
| Q00945 | SLSLTDACFIRNCPKGGKRS | Negative |
| Q00945 | CFIRNCPKGGKRSLDTGMVT | Negative |
| Q00945 | VLSLSLTDACFIRNCPKGGK | Negative |
| Q01117 | LLINFFIAVLGVISLSPIVV | Negative |
| Q01117 | SLSPIVVARYILRRDCTTVT | Negative |
| Q01117 | FFIAVLGVISLSPIVVARYI | Negative |
| Q01117 | LINFFIAVLGVISLSPIVVA | Negative |
| Q01117 | VVARYILRRDCTTVTVLSSP | Negative |
| Q01117 | LRRDCTTVTVLSSPESVTGS | Negative |
| Q01117 | VARYILRRDCTTVTVLSSPE | Negative |
| Q01117 | SPIVVARYILRRDCTTVTVL | Negative |
| Q01117 | MLLINFFIAVLGVISLSPIV | Negative |
| Q01117 | RDCTTVTVLSSPESVTGSNH | Negative |
| Q01117 | LGVISLSPIVVARYILRRDC | Negative |
| Q01117 | FIAVLGVISLSPIVVARYIL | Negative |
| Q01117 | DCTTVTVLSSPESVTGSNHV | Negative |
| Q01117 | RRDCTTVTVLSSPESVTGSN | Negative |
| Q01117 | RYILRRDCTTVTVLSSPESV | Negative |
| Q01117 | VISLSPIVVARYILRRDCTT | Negative |
| Q01117 | ILRRDCTTVTVLSSPESVTG | Negative |
| Q01117 | IVVARYILRRDCTTVTVLSS | Negative |
| Q01117 | ARYILRRDCTTVTVLSSPES | Negative |
| Q01117 | IAVLGVISLSPIVVARYILR | Negative |
| Q01117 | LSPIVVARYILRRDCTTVTV | Negative |
| Q01117 | AVLGVISLSPIVVARYILRR | Negative |
| Q01117 | YILRRDCTTVTVLSSPESVT | Negative |
| Q01117 | CTTVTVLSSPESVTGSNHVQ | Negative |
| Q01117 | GVISLSPIVVARYILRRDCT | Negative |
| Q01117 | VLGVISLSPIVVARYILRRD | Negative |
| Q01117 | PIVVARYILRRDCTTVTVLS | Negative |
| Q01117 | INFFIAVLGVISLSPIVVAR | Negative |

|        |                      |          |
|--------|----------------------|----------|
| Q01117 | NFFIAVLGVISLSPIVVARY | Negative |
| Q01129 | MLEDEASGIIPYDPDNPLIS | Negative |
| Q01129 | MKATLVLFLLAQVSWAGPFE | Negative |
| Q01129 | AQVSWAGPFEQRGLFDFMLE | Negative |
| Q01129 | LLAQVSWAGPFEQRGLFDFM | Negative |
| Q01129 | FMLEDEASGIIPYDPDNPLI | Negative |
| Q01129 | EQRGLFDFMLEDEASGIIPY | Negative |
| Q01129 | QVSWAGPFEQRGLFDFMLED | Negative |
| Q01129 | LVLFLLAQVSWAGPFEQRGL | Negative |
| Q01129 | DFMLEDEASGIIPYDPDNPL | Negative |
| Q01129 | LEDEASGIIPYDPDNPLISM | Negative |
| Q01129 | VSWAGPFEQRGLFDFMLEDE | Negative |
| Q01129 | LFLLAQVSWAGPFEQRGLFD | Negative |
| Q01129 | SWAGPFEQRGLFDFMLEDEA | Negative |
| Q01129 | ATLVLFLLAQVSWAGPFEQR | Negative |
| Q01129 | TLVLFLLAQVSWAGPFEQRG | Negative |
| Q01129 | LFDFMLEDEASGIIPYDPDN | Negative |
| Q01129 | GLFDFMLEDEASGIIPYDPD | Negative |
| Q01129 | FDFMLEDEASGIIPYDPDNP | Negative |
| Q01129 | FLLAQVSWAGPFEQRGLFDF | Negative |
| Q01129 | EDEASGIIPYDPDNPLISMC | Negative |
| Q01129 | GPFEQRGLFDFMLEDEASGI | Negative |
| Q01129 | RGLFDFMLEDEASGIIPYDP | Negative |
| Q01129 | PFEQRGLFDFMLEDEASGII | Negative |
| Q01129 | VLFLLAQVSWAGPFEQRGLF | Negative |
| Q01129 | QRGLFDFMLEDEASGIIPYD | Negative |
| Q01129 | FEQRGLFDFMLEDEASGIIP | Negative |
| Q01129 | WAGPFEQRGLFDFMLEDEAS | Negative |
| Q01129 | AGPFEQRGLFDFMLEDEASG | Negative |
| Q01129 | LAQVSWAGPFEQRGLFDFML | Negative |
| Q01172 | VGVSgsAEGFAEGVTGGGDA | Negative |
| Q01172 | SAEGFAEGVTGGGDATPVYP | Negative |
| Q01172 | AAAVFAGSAAAVGVSGSAEG | Negative |
| Q01172 | GSAAAVGVSGSAEGFAEGVT | Negative |
| Q01172 | AGSAAAVGVSGSAEGFAEGV | Negative |
| Q01172 | GFAEGVTGGGDATPVYPDTI | Negative |
| Q01172 | GSAEGFAEGVTGGGDATPVY | Negative |
| Q01172 | MKYSTIFSAAAVFAGSAAA  | Negative |
| Q01172 | VFAGSAAAVGVSGSAEGFAE | Negative |
| Q01172 | FAEGVTGGGDATPVYPDTID | Negative |
| Q01172 | FAGSAAAVGVSGSAEGFAEG | Negative |
| Q01172 | GVSGSAEGFAEGVTGGGDAT | Negative |
| Q01172 | AAVGVSGSAEGFAEGVTGGG | Negative |
| Q01172 | SAAAVGVSGSAEGFAEGVTG | Negative |
| Q01172 | AAAVFAGSAAAVGVSGSAE  | Negative |
| Q01172 | SGSAEGFAEGVTGGGDATPV | Negative |

|        |                       |          |
|--------|-----------------------|----------|
| Q01172 | STIFSAAAAVFAGSAAAVGV  | Negative |
| Q01172 | AAAVGVSGSAEGFAEGVTGG  | Negative |
| Q01172 | AVFAGSAAAVGVSGSAEGFA  | Negative |
| Q01172 | AVGVSGSAEGFAEGVTGGGD  | Negative |
| Q01172 | YSTIFSAAAAVFAGSAAAVG  | Negative |
| Q01172 | VSGSAEGFAEGVTGGGDATP  | Negative |
| Q01172 | TIFSAAAAVFAGSAAAVGV   | Negative |
| Q01172 | KYSTIFSAAAAVFAGSAAAV  | Negative |
| Q01172 | AEGFAEGVTGGGDATPVYPD  | Negative |
| Q01172 | EGFAEGVTGGGDATPVYPT   | Negative |
| Q01172 | SAAAASFAGSAAAVGVSGSA  | Negative |
| Q01172 | AAVFAGSAAAVGVSGSAEGF  | Negative |
| Q01172 | FSAAAASFAGSAAAVGVSGS  | Negative |
| Q01269 | LDRILESGVLRVATTGDYKP  | Negative |
| Q01269 | LLASASLQAQESRLDRILES  | Negative |
| Q01269 | LQAQESRLDRILESGVLRVA  | Negative |
| Q01269 | ASLQAQESRLDRILESGVLR  | Negative |
| Q01269 | QESRLDRILESGVLRVATTG  | Negative |
| Q01269 | LACLALLASASLQAQESRLD  | Negative |
| Q01269 | PKSFRHLVQALACLALLASA  | Negative |
| Q01269 | CLALLASASLQAQESRLDRI  | Negative |
| Q01269 | LASASLQAQESRLDRILESG  | Negative |
| Q01269 | KSFRHLVQALACLALLASAS  | Negative |
| Q01269 | SFRHLVQALACLALLASASL  | Negative |
| Q01269 | SLQAQESRLDRILESGVLRV  | Negative |
| Q01269 | MPKSFRHLVQALACLALLAS  | Negative |
| Q01269 | AQESRLDRILESGVLRVATT  | Negative |
| Q01269 | QALACLALLASASLQAQESR  | Negative |
| Q01269 | RHLVQALACLALLASASLQA  | Negative |
| Q01269 | LVQALACLALLASASLQAQE  | Negative |
| Q01269 | VQALACLALLASASLQAQES  | Negative |
| Q01269 | ACLALLASASLQAQESRLDR  | Negative |
| Q01269 | ESRLDRILESGVLRVATTGD  | Negative |
| Q01269 | HLVQALACLALLASASLQAQ  | Negative |
| Q01269 | RLDRILESGVLRVATTGDYK  | Negative |
| Q01269 | ALLASASLQAQESRLDRILE  | Negative |
| Q01269 | FRHLVQALACLALLASASLQ  | Negative |
| Q01269 | SRLDRILESGVLRVATTGDY  | Negative |
| Q01269 | QAQESRLDRILESGVLRVAT  | Negative |
| Q01269 | SASLQAQESRLDRILESGVL  | Negative |
| Q01269 | LALLASASLQAQESRLDRIL  | Negative |
| Q01269 | ASASLQAQESRLDRILESGV  | Negative |
| Q01460 | PLLERLSAEDCPCSEASLCR  | Negative |
| Q01460 | CPCSEASLCRPIRHHHRDFEV | Negative |
| Q01460 | LELTLLLLPLLERLSAEDC   | Negative |
| Q01460 | EDCPCSEASLCRPIRHHHRDF | Negative |



|        |                      |          |
|--------|----------------------|----------|
| Q01460 | LLLLPLLERLSAEDCPCSE  | Negative |
| Q01460 | LLERLSAEDCPCSEASLCRP | Negative |
| Q01460 | EASLCRPIRHHRDFEVFVFD | Negative |
| Q01460 | DCPCSEASLCRPIRHHRDFE | Negative |
| Q01460 | RLSAEDCPCSEASLCRPIRH | Negative |
| Q01460 | PCSEASLCRPIRHHRDFEVF | Negative |
| Q01460 | ELTLLLLLPLLERLSAEDCP | Negative |
| Q01460 | LLLLPLLERLSAEDCPCSEA | Negative |
| Q01460 | ERLSAEDCPCSEASLCRPIR | Negative |
| Q01460 | LSDLLELTLLLLLPLLERLS | Negative |
| Q01460 | SAEDCPCSEASLCRPIRHHR | Negative |
| Q01460 | MALSDLLELTLLLLLPLLER | Negative |
| Q01460 | CSEASLCRPIRHHRDFEVFV | Negative |
| Q01460 | LSAEDCPCSEASLCRPIRHH | Negative |
| Q01460 | LERLSAEDCPCSEASLCRPI | Negative |
| Q01460 | TLLLLLPLLERLSAEDCPCS | Negative |
| Q01460 | LLPLLERLSAEDCPCSEASL | Negative |
| Q01460 | LLLPLLERLSAEDCPCSEAS | Negative |
| Q01460 | AEDCPCSEASLCRPIRHHRD | Negative |
| Q01460 | LPLLERLSAEDCPCSEASLC | Negative |
| Q01460 | DLLELTLLLLLPLLERLSAE | Negative |
| Q01460 | SEASLCRPIRHHRDFEVFVF | Negative |
| Q01460 | ALSDLLELTLLLLLPLLERL | Negative |
| Q01460 | SDLLELTLLLLLPLLERLSA | Negative |
| Q01460 | LLELTLLLLLPLLERLSAED | Negative |
| Q01490 | VALATLVSASTNPKVTNKVY | Negative |
| Q01490 | ASTNPKVTNKVYFDIKQGDK | Negative |
| Q01490 | TNPKVTNKVYFDIKQGDKDL | Negative |
| Q01490 | PKVTNKVYFDIKQGDKDLGR | Negative |
| Q01490 | IFLAIVALATLVSASTNPKV | Negative |
| Q01490 | TNKVYFDIKQGDKDLGRIVL | Negative |
| Q01490 | SVIFLAIVALATLVSASTNP | Negative |
| Q01490 | TLVSASTNPKVTNKVYFDIK | Negative |
| Q01490 | LVSASTNPKVTNKVYFDIKQ | Negative |
| Q01490 | AIVALATLVSASTNPKVTNK | Negative |
| Q01490 | KVTNKVYFDIKQGDKDLGRI | Negative |
| Q01490 | STNPKVTNKVYFDIKQGDKD | Negative |
| Q01490 | NFSIKSVIFLAIVALATLV  | Negative |
| Q01490 | SIKSVIFLAIVALATLV    | Negative |
| Q01490 | VSASTNPKVTNKVYFDIKQG | Negative |
| Q01490 | ALATLVSASTNPKVTNKVYF | Negative |
| Q01490 | IKSVIFLAIVALATLV     | Negative |
| Q01490 | LATLVSASTNPKVTNKVYFD | Negative |
| Q01490 | FLAIVALATLVSASTNPKVT | Negative |
| Q01490 | NPKVTNKVYFDIKQGDKDLG | Negative |
| Q01490 | VTNKVYFDIKQGDKDLGRIV | Negative |

|        |                      |          |
|--------|----------------------|----------|
| Q01490 | KSVIFLAIVALATLVASTN  | Negative |
| Q01490 | ATLVASTNPKVTNKVYFDI  | Negative |
| Q01490 | FSIKSVIFLAIVALATLVSA | Negative |
| Q01490 | IVALATLVASTNPKVTNKV  | Negative |
| Q01490 | SASTNPKVTNKVYFDIKQGD | Negative |
| Q01490 | LAIVALATLVASTNPKVTN  | Negative |
| Q01490 | MNFSIKSVIFLAIVALATLV | Negative |
| Q01490 | NKVYFDIKQGDKDLGRIVLG | Negative |
| Q01528 | VIIIFSTLTFSEAWVNDWDG | Negative |
| Q01528 | STLTFSEAWVNDWDGALNFQ | Negative |
| Q01528 | VNDWDGALNFQCQLKDSIKT | Negative |
| Q01528 | MNSPAIVIIIFSTLTFSEAW | Negative |
| Q01528 | LNFCQLKDSIKTISSHSN   | Negative |
| Q01528 | TFSEAWVNDWDGALNFQCQL | Negative |
| Q01528 | WDGALNFQCQLKDSIKTISS | Negative |
| Q01528 | NSPAIVIIIFSTLTFSEAWV | Negative |
| Q01528 | FSTLTFSEAWVNDWDGALNF | Negative |
| Q01528 | IIIFSTLTFSEAWVNDWDGA | Negative |
| Q01528 | IIFSTLTFSEAWVNDWDGAL | Negative |
| Q01528 | NDWDGALNFQCQLKDSIKTI | Negative |
| Q01528 | TLTFSEAWVNDWDGALNFQC | Negative |
| Q01528 | FSEAWVNDWDGALNFQCQLK | Negative |
| Q01528 | GALNFQCQLKDSIKTISSIH | Negative |
| Q01528 | DWDGALNFQCQLKDSIKTIS | Negative |
| Q01528 | LTFSEAWVNDWDGALNFQCQ | Negative |
| Q01528 | SPAIVIIIFSTLTFSEAWVN | Negative |
| Q01528 | ALNFQCQLKDSIKTISSHS  | Negative |
| Q01528 | FQCQLKDSIKTISSHSNHH  | Negative |
| Q01528 | SEAWVNDWDGALNFQCQLKD | Negative |
| Q01528 | IVIIIFSTLTFSEAWVNDWD | Negative |
| Q01528 | AWVNDWDGALNFQCQLKDSI | Negative |
| Q01528 | NFQCQLKDSIKTISSHSNH  | Negative |
| Q01528 | PAIVIIIFSTLTFSEAWVND | Negative |
| Q01528 | EAWVNDWDGALNFQCQLKDS | Negative |
| Q01528 | WVNDWDGALNFQCQLKDSIK | Negative |
| Q01528 | IFSTLTFSEAWVNDWDGALN | Negative |
| Q01528 | DGALNFQCQLKDSIKTISSI | Negative |
| Q01584 | FALVALSALCVYGDVPIQPD | Negative |
| Q01584 | ALCVYGDVPIQPFDQEDKIL | Negative |
| Q01584 | KGLVLSFALVALSALCVYGD | Negative |
| Q01584 | VPIQPFDQEDKILGKWWYIG | Negative |
| Q01584 | YGDVPIQPFDQEDKILGKWY | Negative |
| Q01584 | PIQPFDQEDKILGKWWYIGL | Negative |
| Q01584 | VYGDVPIQPFDQEDKILGKW | Negative |
| Q01584 | FQEDKILGKWWYIGLASNSN | Negative |
| Q01584 | DFQEDKILGKWWYIGLASNS | Negative |

|        |                       |          |
|--------|-----------------------|----------|
| Q01584 | CVYGDVPIQPPDFQEDKILGK | Negative |
| Q01584 | IQPDFQEDKILGKWYGIGLA  | Negative |
| Q01584 | PDFQEDKILGKWYGIGLASN  | Negative |
| Q01584 | DVPIQPPDFQEDKILGKWYGI | Negative |
| Q01584 | MKGLVLSFALVALSALCVYG  | Negative |
| Q01584 | ALSALCVYGDVPIQPPDFQED | Negative |
| Q01584 | EDKILGKWYGIGLASNSNWF  | Negative |
| Q01584 | GLVLSFALVALSALCVYGDV  | Negative |
| Q01584 | QPDFQEDKILGKWYGIGLAS  | Negative |
| Q01584 | LVALSALCVYGDVPIQPPDFQ | Negative |
| Q01584 | ALVALSALCVYGDVPIQPPDF | Negative |
| Q01584 | GDVPIQPPDFQEDKILGKWYG | Negative |
| Q01584 | LCVYGDVPIQPPDFQEDKILG | Negative |
| Q01584 | LVLSFALVALSALCVYGDVP  | Negative |
| Q01584 | SALCVYGDVPIQPPDFQEDKI | Negative |
| Q01584 | SFALVALSALCVYGDVPIQP  | Negative |
| Q01584 | QEDKILGKWYGIGLASNSNW  | Negative |
| Q01584 | LSALCVYGDVPIQPPDFQEDK | Negative |
| Q01584 | VLSFALVALSALCVYGDVPI  | Negative |
| Q01584 | VALSALCVYGDVPIQPPDFQE | Negative |
| Q01682 | KLSGISLWLLAASIVHAGKS  | Negative |
| Q01682 | AGKSQFEAFENEFEYFKDHLG | Negative |
| Q01682 | LWLLAASIVHAGKSQFEAFE  | Negative |
| Q01682 | ASIVHAGKSQFEAFENEFEYF | Negative |
| Q01682 | MKLSGISLWLLAASIVHAGK  | Negative |
| Q01682 | SIVHAGKSQFEAFENEFEYFK | Negative |
| Q01682 | GKSQFEAFENEFEYFKDHLGT | Negative |
| Q01682 | AASIVHAGKSQFEAFENEFEY | Negative |
| Q01682 | VHAGKSQFEAFENEFEYFKDH | Negative |
| Q01682 | FEAFENEFEYFKDHLGTISVY | Negative |
| Q01682 | AFENEFEYFKDHLGTISVYHE | Negative |
| Q01682 | SQFEAFENEFEYFKDHLGTIS | Negative |
| Q01682 | LAASIVHAGKSQFEAFENEFE | Negative |
| Q01682 | ENEFEYFKDHLGTISVYHEPY | Negative |
| Q01682 | QFEAFENEFEYFKDHLGTISV | Negative |
| Q01682 | KSQFEAFENEFEYFKDHLGTI | Negative |
| Q01682 | GISLWLLAASIVHAGKSQFE  | Negative |
| Q01682 | ISLWLLAASIVHAGKSQFEA  | Negative |
| Q01682 | EAFENEFEYFKDHLGTISVYH | Negative |
| Q01682 | FYFKDHLGTISVYHEPYFNG  | Negative |
| Q01682 | WLLAASIVHAGKSQFEAFEN  | Negative |
| Q01682 | IVHAGKSQFEAFENEFEYFKD | Negative |
| Q01682 | SLWLLAASIVHAGKSQFEAF  | Negative |
| Q01682 | LLAASIVHAGKSQFEAFENE  | Negative |
| Q01682 | FENEFEYFKDHLGTISVYHEP | Negative |
| Q01682 | LSGISLWLLAASIVHAGKSQ  | Negative |

|        |                       |          |
|--------|-----------------------|----------|
| Q01682 | NEFYFKDHLGTISVYHEPYF  | Negative |
| Q01682 | EFYFKDHLGTISVYHEPYFN  | Negative |
| Q01682 | HAGKSQFEAFENEFYFKDHL  | Negative |
| Q01774 | NPDGFKTVVSLSDGSASQAS  | Negative |
| Q01774 | LLVCALAALVAANENAEVKE  | Negative |
| Q01774 | NAEVKELVNEVNPDGFKTVV  | Negative |
| Q01774 | CALAALVAANENAEVKELVN  | Negative |
| Q01774 | ALAALVAANENAEVKELVNE  | Negative |
| Q01774 | VCALAALVAANENAEVKELV  | Negative |
| Q01774 | AANENAEVKELVNEVNPDG   | Negative |
| Q01774 | NEVNPDGFKTVVSLSDGSAS  | Negative |
| Q01774 | EVNPDGFKTVVSLSDGSASQ  | Negative |
| Q01774 | LAALVAANENAEVKELVNEV  | Negative |
| Q01774 | AALVAANENAEVKELVNEVN  | Negative |
| Q01774 | ALVAANENAEVKELVNEVNP  | Negative |
| Q01774 | LVCALAALVAANENAEVKEL  | Negative |
| Q01774 | ANENAEVKELVNEVNPDGFK  | Negative |
| Q01774 | KILLVCALAALVAANENAEV  | Negative |
| Q01774 | LVNEVNPDGFKTVVSLSDGS  | Negative |
| Q01774 | ENAEVKELVNEVNPDGFKTV  | Negative |
| Q01774 | ILLVCALAALVAANENAEVK  | Negative |
| Q01774 | AEVKELVNEVNPDGFKTVVS  | Negative |
| Q01774 | LVAANENAEVKELVNEVNP   | Negative |
| Q01774 | MFKILLVCALAALVAANENA  | Negative |
| Q01774 | KELVNEVNPDGFKTVVSLSD  | Negative |
| Q01774 | VNPDGFKTVVSLSDGSASQA  | Negative |
| Q01774 | ELVNEVNPDGFKTVVSLSDG  | Negative |
| Q01774 | VAANENAEVKELVNEVNP    | Negative |
| Q01774 | VKELVNEVNPDGFKTVVSL   | Negative |
| Q01774 | VNEVNPDGFKTVVSLSDGSA  | Negative |
| Q01774 | EVKELVNEVNPDGFKTVVSL  | Negative |
| Q01774 | NENAEVKELVNEVNPDGFKT  | Negative |
| Q02083 | RPGLPSLLLLLAGAGLSAA   | Negative |
| Q02083 | LPSLLLLLAGAGLSAASPP   | Negative |
| Q02083 | TADREARPGLPSLLLLLAG   | Negative |
| Q02083 | LLLAGAGLSAASPPAAPRFN  | Negative |
| Q02083 | SAASPPAAPRFNVSLDSVPE  | Negative |
| Q02083 | ARPLPSLLLLLAGAGLSA    | Negative |
| Q02083 | PGLPSLLLLLAGAGLSAAS   | Negative |
| Q02083 | LLLLLAGAGLSAASPPAAPRF | Negative |
| Q02083 | LLLLLAGAGLSAASPPAAP   | Negative |
| Q02083 | LAGAGLSAASPPAAPRFNVS  | Negative |
| Q02083 | GLPSLLLLLAGAGLSAASP   | Negative |
| Q02083 | MRTADREARPGLPSLLLLL   | Negative |
| Q02083 | ADREARPGLPSLLLLLAGA   | Negative |
| Q02083 | PPAAPRFNVSLDSVPELRWL  | Negative |

|        |                      |          |
|--------|----------------------|----------|
| Q02083 | DREARGLPSLLLLLLAGAG  | Negative |
| Q02083 | AASPPAAPRFNVSLDSVPEL | Negative |
| Q02083 | AGLSAASPPAAPRFNVSLDS | Negative |
| Q02083 | REARGLPSLLLLLLAGAGL  | Negative |
| Q02083 | RTADREARGLPSLLLLLLA  | Negative |
| Q02083 | GAGLSAASPPAAPRFNVSLD | Negative |
| Q02083 | SPPAAPRFNVSLDSVPELRW | Negative |
| Q02083 | ASPPAAPRFNVSLDSVPELR | Negative |
| Q02083 | LSAASPPAAPRFNVSLDSVP | Negative |
| Q02083 | EARGLPSLLLLLLAGAGLS  | Negative |
| Q02083 | LLAGAGLSAASPPAAPRFNV | Negative |
| Q02083 | AGAGLSAASPPAAPRFNVSL | Negative |
| Q02083 | PSLLLLLLAGAGLSAASPPA | Negative |
| Q02083 | GLSAASPPAAPRFNVSLDSV | Negative |
| Q02083 | LLLLLAGAGLSAASPPAAPR | Negative |
| Q02113 | VSFAADSNISVKLLNYIGNK | Negative |
| Q02113 | AILLIPSVSFAADSNISVK  | Negative |
| Q02113 | LLIPSVSFAADSNISVKLLN | Negative |
| Q02113 | SVSFAADSNISVKLLNYIGN | Negative |
| Q02113 | PSVSFAADSNISVKLLNYIG | Negative |
| Q02113 | QLIVCSLAAILLLIPSVSFA | Negative |
| Q02113 | KSCKQLIVCSLAAILLLIPS | Negative |
| Q02113 | SNISVKLLNYIGNKSSISLS | Negative |
| Q02113 | NISVKLLNYIGNKSSISLSP | Negative |
| Q02113 | FAADSNISVKLLNYIGNKSS | Negative |
| Q02113 | ISVKLLNYIGNKSSISLSPT | Negative |
| Q02113 | IVCSLAAILLLIPSVSFAAD | Negative |
| Q02113 | SCKQLIVCSLAAILLLIPSV | Negative |
| Q02113 | CKQLIVCSLAAILLLIPSVS | Negative |
| Q02113 | ADSNISVKLLNYIGNKSSIS | Negative |
| Q02113 | IPSVSFAADSNISVKLLNYI | Negative |
| Q02113 | VCSLAAILLLIPSVSFAADS | Negative |
| Q02113 | LLIPSVSFAADSNISVKLL  | Negative |
| Q02113 | AADSNISVKLLNYIGNKSSI | Negative |
| Q02113 | MKCKQLIVCSLAAILLLIP  | Negative |
| Q02113 | CSLAAILLLIPSVSFAADSN | Negative |
| Q02113 | LIPSVSFAADSNISVKLLNY | Negative |
| Q02113 | DSNISVKLLNYIGNKSSISL | Negative |
| Q02113 | SFAADSNISVKLLNYIGNKS | Negative |
| Q02113 | AAILLLIPSVSFAADSNISV | Negative |
| Q02113 | LIVCSLAAILLLIPSVSFAA | Negative |
| Q02113 | ILLIPSVSFAADSNISVKL  | Negative |
| Q02113 | LAAILLLIPSVSFAADSNIS | Negative |
| Q02113 | KQLIVCSLAAILLLIPSVSF | Negative |
| Q02114 | KRVGGSNRYGTAVQISKQMY | Negative |
| Q02114 | SYIKVLTMCFLGLILFVPTA | Negative |

|        |                      |          |
|--------|----------------------|----------|
| Q02114 | TALADNSVKRVGGSNRYGTA | Negative |
| Q02114 | ADNSVKRVGGSNRYGTAVQI | Negative |
| Q02114 | VLTMCFLGLILFVPTALADN | Negative |
| Q02114 | YIKVLTMCFLGLILFVPTAL | Negative |
| Q02114 | RSYIKVLTMCFLGLILFVPT | Negative |
| Q02114 | NSVKRVGGSNRYGTAVQISK | Negative |
| Q02114 | RVGGSNRYGTAVQISKQMYS | Negative |
| Q02114 | KVLTMCFLGLILFVPTALAD | Negative |
| Q02114 | DNSVKRVGGSNRYGTAVQIS | Negative |
| Q02114 | LADNSVKRVGGSNRYGTAVQ | Negative |
| Q02114 | IKVLTMCFLGLILFVPTALA | Negative |
| Q02114 | SVKRVGGSNRYGTAVQISKQ | Negative |
| Q02114 | LFVPTALADNSVKRVGGSNR | Negative |
| Q02114 | LGLILFVPTALADNSVKRVG | Negative |
| Q02114 | VKRVGGSNRYGTAVQISKQM | Negative |
| Q02114 | GLILFVPTALADNSVKRVGG | Negative |
| Q02114 | FLGLILFVPTALADNSVKRV | Negative |
| Q02114 | LILFVPTALADNSVKRVGGS | Negative |
| Q02114 | ILFVPTALADNSVKRVGGSN | Negative |
| Q02114 | VPTALADNSVKRVGGSNRYG | Negative |
| Q02114 | LTCFLGLILFVPTALADNS  | Negative |
| Q02114 | ALADNSVKRVGGSNRYGTAV | Negative |
| Q02114 | TMCFLGLILFVPTALADNSV | Negative |
| Q02114 | MRSYIKVLTMCFLGLILFVP | Negative |
| Q02114 | CFLGLILFVPTALADNSVKR | Negative |
| Q02114 | FVPTALADNSVKRVGGSNRY | Negative |
| Q02114 | PTALADNSVKRVGGSNRYGT | Negative |
| Q02126 | VDVAVALVLVALAAFPVHS  | Negative |
| Q02126 | VALVLVALAAFPVHSIGVC  | Negative |
| Q02126 | NGVLGNNLPAPSDVVTLYRS | Negative |
| Q02126 | VALAAFPVHSIGVCNGVLG  | Negative |
| Q02126 | IGVCNGVLGNNLPAPSDVVT | Negative |
| Q02126 | AFPVHSIGVCNGVLGNNLP  | Negative |
| Q02126 | GVDVAVALVLVALAAFPVH  | Negative |
| Q02126 | GVCNGVLGNNLPAPSDVVTL | Negative |
| Q02126 | SIGVCNGVLGNNLPAPSDVV | Negative |
| Q02126 | CNGVLGNNLPAPSDVVTLYR | Negative |
| Q02126 | VAVALVLVALAAFPVHSIG  | Negative |
| Q02126 | RKGVDVAVALVLVALAAFP  | Negative |
| Q02126 | PAVHSIGVCNGVLGNNLPAP | Negative |
| Q02126 | AVALVLVALAAFPVHSIGV  | Negative |
| Q02126 | HSIGVCNGVLGNNLPAPSDV | Negative |
| Q02126 | LVALAAFPVHSIGVCNGVL  | Negative |
| Q02126 | ARKGVDVAVALVLVALAAFP | Negative |
| Q02126 | DVAVALVLVALAAFPVHSI  | Negative |
| Q02126 | AAFPVHSIGVCNGVLGNNL  | Negative |

|        |                       |          |
|--------|-----------------------|----------|
| Q02126 | KGVDVAVALVLVALAAFPV   | Negative |
| Q02126 | VHSIGVCNGVLGNNLPAPSD  | Negative |
| Q02126 | VCNGVLGNNLPAPSDVVTLY  | Negative |
| Q02126 | ALAAFPVHVSIGVCNGVLGN  | Negative |
| Q02126 | AVHSIGVCNGVLGNNLPAPS  | Negative |
| Q02126 | LAAFPVHVSIGVCNGVLGNN  | Negative |
| Q02126 | MARKGVDVAVALVLVALAAF  | Negative |
| Q02126 | VLVALAAFPVHVSIGVCNGV  | Negative |
| Q02126 | FPAVHVSIGVCNGVLGNNLPA | Negative |
| Q02126 | LVLVALAAFPVHVSIGVCNG  | Negative |
| Q02246 | LVSSAWSSALGSQTTFGPV   | Negative |
| Q02246 | VAAVALVSSAWSSALGSQT   | Negative |
| Q02246 | VSSAWSSALGSQTTFGPVF   | Negative |
| Q02246 | AAVALVSSAWSSALGSQTT   | Negative |
| Q02246 | LVAVALVSSAWSSALGSQ    | Negative |
| Q02246 | SSALGSQTTFGPVVFEDQPLS | Negative |
| Q02246 | TRRKPHLLLVAVALVSSSA   | Negative |
| Q02246 | MGTATRRKPHLLLVAVALV   | Negative |
| Q02246 | SALGSQTTFGPVVFEDQPLSV | Negative |
| Q02246 | HLLVAAVALVSSAWSSAL    | Negative |
| Q02246 | KPHLLLVAVALVSSAWSS    | Negative |
| Q02246 | GSQTTFGPVVFEDQPLSVLFP | Negative |
| Q02246 | ALGSQTTFGPVVFEDQPLSVL | Negative |
| Q02246 | RRKPHLLLVAVALVSSSAW   | Negative |
| Q02246 | SAWSSALGSQTTFGPVVFEDQ | Negative |
| Q02246 | LGSQTTFGPVVFEDQPLSVLF | Negative |
| Q02246 | AWSSALGSQTTFGPVVFEDQP | Negative |
| Q02246 | LLVAVALVSSAWSSALGS    | Negative |
| Q02246 | TATRRKPHLLLVAVALVSS   | Negative |
| Q02246 | VALVSSAWSSALGSQTTFG   | Negative |
| Q02246 | LLLVAVALVSSAWSSALG    | Negative |
| Q02246 | ALVSSAWSSALGSQTTFGP   | Negative |
| Q02246 | SSAWSSALGSQTTFGPVFED  | Negative |
| Q02246 | ATRRKPHLLLVAVALVSSS   | Negative |
| Q02246 | GTATRRKPHLLLVAVALVS   | Negative |
| Q02246 | RKPHLLLVAVALVSSSAWS   | Negative |
| Q02246 | PHLLLVAVALVSSSAWSSA   | Negative |
| Q02246 | SSSAWSSALGSQTTFGPVFE  | Negative |
| Q02246 | WSSALGSQTTFGPVVFEDQPL | Negative |
| Q02567 | AVRAAPTAVCPDGTRVSHAA  | Negative |
| Q02567 | RVSHAACCAFIPLAQDLQET  | Negative |
| Q02567 | GTRVSHAACCAFIPLAQDLQ  | Negative |
| Q02567 | LAAAVRAAPTAVCPDGTRVS  | Negative |
| Q02567 | AVCPDGTRVSHAACCAFIPL  | Negative |
| Q02567 | FVALAAAVRAAPTAVCPDGT  | Negative |
| Q02567 | APTAVCPDGTRVSHAACCAF  | Negative |

|        |                       |          |
|--------|-----------------------|----------|
| Q02567 | AAAVRAAPTAVCPDGTRVSH  | Negative |
| Q02567 | KSLIAFVALAAAVRAAPTAV  | Negative |
| Q02567 | VALAAAVRAAPTAVCPDGTR  | Negative |
| Q02567 | VRAAPTAVCPDGTRVSHAAC  | Negative |
| Q02567 | CPDGTRVSHAACCAFIPLAQ  | Negative |
| Q02567 | AFKSLIAFVALAAAVRAAPT  | Negative |
| Q02567 | LIAFVALAAAVRAAPTAVCP  | Negative |
| Q02567 | DGTRVSHAACCAFIPLAQDL  | Negative |
| Q02567 | VCPDGTRVSHAACCAFIPLA  | Negative |
| Q02567 | PTAVCPDGTRVSHAACCAFI  | Negative |
| Q02567 | TAVCPDGTRVSHAACCAFIP  | Negative |
| Q02567 | MAFKSLIAFVALAAAVRAAP  | Negative |
| Q02567 | AAPTAVCPDGTRVSHAACCA  | Negative |
| Q02567 | FKSLIAFVALAAAVRAAPTA  | Negative |
| Q02567 | SLIAFVALAAAVRAAPTAVC  | Negative |
| Q02567 | VSHAACCAFIPLAQDLQETI  | Negative |
| Q02567 | AAVRAAPTAVCPDGTRVSHA  | Negative |
| Q02567 | AFVALAAAVRAAPTAVCPDG  | Negative |
| Q02567 | PDGTRVSHAACCAFIPLAQD  | Negative |
| Q02567 | ALAAAVRAAPTAVCPDGTRV  | Negative |
| Q02567 | RAAPTAVCPDGTRVSHAACC  | Negative |
| Q02567 | TRVSHAACCAFIPLAQDLQE  | Negative |
| Q02596 | AATSLALLPGSKDELQMKTQ  | Negative |
| Q02596 | ALLPGSKDELQMKTQPTDAI  | Negative |
| Q02596 | LLFVSLAATSLALLPGSKDE  | Negative |
| Q02596 | FTVLLFVSLAATSLALLPGS  | Negative |
| Q02596 | MKTQPTDAIPAAQSTPTS    | Negative |
| Q02596 | KTQPTDAIPAAQSTPTS     | Negative |
| Q02596 | VLLFVSLAATSLALLPGSKD  | Negative |
| Q02596 | LPGSKDELQMKTQPTDAIPA  | Negative |
| Q02596 | LFVSLAATSLALLPGSKDEL  | Negative |
| Q02596 | GSKDELQMKTQPTDAIPAAQ  | Negative |
| Q02596 | LQMKTQPTDAIPAAQSTPTS  | Negative |
| Q02596 | LAATSLALLPGSKDELQMKT  | Negative |
| Q02596 | LALLPGSKDELQMKTQPTDA  | Negative |
| Q02596 | MKFFT VLLFVSLAATSLALL | Negative |
| Q02596 | ELQMKTQPTDAIPAAQSTPT  | Negative |
| Q02596 | LLPGSKDELQMKTQPTDAIP  | Negative |
| Q02596 | ATSLALLPGSKDELQMKTQP  | Negative |
| Q02596 | FFT VLLFVSLAATSLALLPG | Negative |
| Q02596 | TSLALLPGSKDELQMKTQPT  | Negative |
| Q02596 | SLALLPGSKDELQMKTQPTD  | Negative |
| Q02596 | SKDELQMKTQPTDAIPAAQS  | Negative |
| Q02596 | QMKTQPTDAIPAAQSTPTS   | Negative |
| Q02596 | DELQMKTQPTDAIPAAQSTP  | Negative |
| Q02596 | PGSKDELQMKTQPTDAIPAA  | Negative |



|        |                       |          |
|--------|-----------------------|----------|
| Q02596 | KDELQMKQTQPTDAIPAAQST | Negative |
| Q02596 | FVSLAATSLALLPGSKDELQ  | Negative |
| Q02596 | VSLAATSLALLPGSKDELQM  | Negative |
| Q02596 | KFFTIVLLFVSLAATSLALLP | Negative |
| Q02596 | SLAATSLALLPGSKDELQMK  | Negative |
| Q02747 | LLSALCLLGAWAALAGGVTV  | Negative |
| Q02747 | VTVDQGNFSFSLESVKKLKD  | Negative |
| Q02747 | LSALCLLGAWAALAGGVTVQ  | Negative |
| Q02747 | GGVTVQDGNFSFSLESVKKL  | Negative |
| Q02747 | MNAFLLSALCLLGAWAALAG  | Negative |
| Q02747 | NFSFSLESVKKLKDLQEPQE  | Negative |
| Q02747 | GAWAALAGGVTVQDGNFSFS  | Negative |
| Q02747 | SFSLESVKKLKDLQEPQEPR  | Negative |
| Q02747 | AALAGGVTVQDGNFSFSLES  | Negative |
| Q02747 | LAGGVTVQDGNFSFSLESVK  | Negative |
| Q02747 | ALCLLGAWAALAGGVTVQDG  | Negative |
| Q02747 | FSFSLESVKKLKDLQEPQEP  | Negative |
| Q02747 | GVTVDQGNFSFSLESVKKLK  | Negative |
| Q02747 | AFLLSALCLLGAWAALAGGV  | Negative |
| Q02747 | WAALAGGVTVQDGNFSFSLE  | Negative |
| Q02747 | AGGVTVQDGNFSFSLESVKK  | Negative |
| Q02747 | QDGNFSFSLESVKKLKDLQE  | Negative |
| Q02747 | GNFSFSLESVKKLKDLQEPQ  | Negative |
| Q02747 | NAFLLSALCLLGAWAALAGG  | Negative |
| Q02747 | LGAWAALAGGVTVQDGNFSF  | Negative |
| Q02747 | VQDGNFSFSLESVKKLKDLQ  | Negative |
| Q02747 | TVQDGNFSFSLESVKKLKDL  | Negative |
| Q02747 | LCLLGAWAALAGGVTVQDGN  | Negative |
| Q02747 | AWAALAGGVTVQDGNFSFSL  | Negative |
| Q02747 | LLGAWAALAGGVTVQDGNFS  | Negative |
| Q02747 | CLLGAWAALAGGVTVQDGNF  | Negative |
| Q02747 | FLLSALCLLGAWAALAGGV   | Negative |
| Q02747 | ALAGGVTVQDGNFSFSLESV  | Negative |
| Q02747 | DGNFSFSLESVKKLKDLQEP  | Negative |
| Q02809 | LLLALLGWLLLAELAKGDAKP | Negative |
| Q02809 | PLLLLALLGWLLLAELAKGDA | Negative |
| Q02809 | LLVLTVATKETEGFRRFKRS  | Negative |
| Q02809 | GWLLLAELAKGDAKPEDNLLV | Negative |
| Q02809 | PEDNLLVLTVATKETEGFRR  | Negative |
| Q02809 | AEAKGDAKPEDNLLVLTVAT  | Negative |
| Q02809 | LLLAELAKGDAKPEDNLLVLT | Negative |
| Q02809 | LGWLLLAELAKGDAKPEDNLL | Negative |
| Q02809 | GDAKPEDNLLVLTVATKETE  | Negative |
| Q02809 | LLAEAKGDAKPEDNLLVLTV  | Negative |
| Q02809 | LAELAKGDAKPEDNLLVLTVA | Negative |
| Q02809 | EDNLLVLTVATKETEGFRRF  | Negative |

|        |                       |          |
|--------|-----------------------|----------|
| Q02809 | ALLGWLLLAELAKGDAKPEDN | Negative |
| Q02809 | RPLLLLALLGWLLLAELAKGD | Negative |
| Q02809 | LVLTVATKETEGFRRFKRSA  | Negative |
| Q02809 | AKPEDNLLVLTVATKETEGF  | Negative |
| Q02809 | KGDAKPEDNLLVLTVATKET  | Negative |
| Q02809 | MRPLLLLALLGWLLLAELAKG | Negative |
| Q02809 | VLTVATKETEGFRRFKRSAQ  | Negative |
| Q02809 | NLLVLTVATKETEGFRRFKR  | Negative |
| Q02809 | LLGWLLLAELAKGDAKPEDNL | Negative |
| Q02809 | WLLLAELAKGDAKPEDNLLVL | Negative |
| Q02809 | AKGDAKPEDNLLVLTVATKE  | Negative |
| Q02809 | EAKGDAKPEDNLLVLTVATK  | Negative |
| Q02809 | LALLGWLLLAELAKGDAKPED | Negative |
| Q02809 | DAKPEDNLLVLTVATKETEG  | Negative |
| Q02809 | DNLLVLTVATKETEGFRRFK  | Negative |
| Q02809 | KPEDNLLVLTVATKETEGFR  | Negative |
| Q02809 | LLALLGWLLLAELAKGDAKPE | Negative |
| Q02834 | RAVSFLLAPALAAATVAGAS  | Negative |
| Q02834 | RRLPRRRRAVSFLLAPALAAA | Negative |
| Q02834 | MTANPYLRRLPRRRRAVSFLL | Negative |
| Q02834 | SFLLAPALAAATVAGASPAQ  | Negative |
| Q02834 | LPRRRRAVSFLLAPALAAATV | Negative |
| Q02834 | PRRRRAVSFLLAPALAAATVA | Negative |
| Q02834 | TVAGASPAQAIAGAPVPPGG  | Negative |
| Q02834 | RRRAVSFLLAPALAAATVAG  | Negative |
| Q02834 | FLLAPALAAATVAGASPAQA  | Negative |
| Q02834 | AATVAGASPAQAIAGAPVPP  | Negative |
| Q02834 | PALAAATVAGASPAQAIAGA  | Negative |
| Q02834 | LAPALAAATVAGASPAQAIA  | Negative |
| Q02834 | APALAAATVAGASPAQAIAG  | Negative |
| Q02834 | ATVAGASPAQAIAGAPVPPG  | Negative |
| Q02834 | ANPYLRRLPRRRRAVSFLLAP | Negative |
| Q02834 | LRRLPRRRRAVSFLLAPALAA | Negative |
| Q02834 | VSFLLAPALAAATVAGASPA  | Negative |
| Q02834 | VAGASPAQAIAGAPVPPGGE  | Negative |
| Q02834 | PYLRRLPRRRRAVSFLLAPAL | Negative |
| Q02834 | RLPRRRRAVSFLLAPALAAAT | Negative |
| Q02834 | TANPYLRRLPRRRRAVSFLLA | Negative |
| Q02834 | AVSFLLAPALAAATVAGASP  | Negative |
| Q02834 | LAAATVAGASPAQAIAGAPV  | Negative |
| Q02834 | LLAPALAAATVAGASPAQAI  | Negative |
| Q02834 | AGASPAQAIAGAPVPPGGEP  | Negative |
| Q02834 | AAATVAGASPAQAIAGAPVP  | Negative |
| Q02834 | YLRRLPRRRRAVSFLLAPALA | Negative |
| Q02834 | NPYLRRLPRRRRAVSFLLAPA | Negative |
| Q02834 | RRRAVSFLLAPALAAATVAGA | Negative |

|        |                      |          |
|--------|----------------------|----------|
| Q02934 | SLGRRKILLILAVIVAFSTV | Negative |
| Q02934 | ILAVIVAFSTVLLFAKLWGR | Negative |
| Q02934 | VLLFAKLWGRKTSSTLDEVG | Negative |
| Q02934 | STVLLFAKLWGRKTSSTLDE | Negative |
| Q02934 | FSTVLLFAKLWGRKTSSTLD | Negative |
| Q02934 | TVLLFAKLWGRKTSSTLDEV | Negative |
| Q02934 | LVNSLGRRKILLILAVIVAF | Negative |
| Q02934 | LLFAKLWGRKTSSTLDEVGS | Negative |
| Q02934 | LILAVIVAFSTVLLFAKLWG | Negative |
| Q02934 | AKLWGRKTSSTLDEVGSKTH | Negative |
| Q02934 | ILLILAVIVAFSTVLLFAKL | Negative |
| Q02934 | AFSTVLLFAKLWGRKTSSTL | Negative |
| Q02934 | KLWGRKTSSTLDEVGSKTHG | Negative |
| Q02934 | RKILLILAVIVAFSTVLLFA | Negative |
| Q02934 | IVAFSTVLLFAKLWGRKTSS | Negative |
| Q02934 | LGRRKILLILAVIVAFSTVL | Negative |
| Q02934 | VIVAFSTVLLFAKLWGRKTS | Negative |
| Q02934 | FAKLWGRKTSSTLDEVGSKT | Negative |
| Q02934 | LAVIVAFSTVLLFAKLWGRK | Negative |
| Q02934 | KILLILAVIVAFSTVLLFAK | Negative |
| Q02934 | RLVNSLGRRKILLILAVIVA | Negative |
| Q02934 | RRKILLILAVIVAFSTVLLF | Negative |
| Q02934 | LLILAVIVAFSTVLLFAKLW | Negative |
| Q02934 | VNSLGRRKILLILAVIVAFS | Negative |
| Q02934 | NSLGRRKILLILAVIVAFST | Negative |
| Q02934 | GRRKILLILAVIVAFSTVLL | Negative |
| Q02934 | MRLVNSLGRRKILLILAVIV | Negative |
| Q02934 | AVIVAFSTVLLFAKLWGRKT | Negative |
| Q02934 | LFAKLWGRKTSSTLDEVGSK | Negative |
| Q02934 | VAFSTVLLFAKLWGRKTSST | Negative |
| Q02942 | TPEGSPHHEIYKVCVPEGAL | Negative |
| Q02942 | LAMPTPEGSPHHEIYKVCVP | Negative |
| Q02942 | CLTLLFSASAVLAMPTPEGS | Negative |
| Q02942 | YKVCVPEGALESCHRMSQES | Negative |
| Q02942 | LCLTLLFSASAVLAMPTPEG | Negative |
| Q02942 | ASAVLAMPTPEGSPHHEIYK | Negative |
| Q02942 | GSPHHEIYKVCVPEGALESC | Negative |
| Q02942 | LTLLFSASAVLAMPTPEGSP | Negative |
| Q02942 | MLLCLTLLFSASAVLAMPTP | Negative |
| Q02942 | PHHEIYKVCVPEGALESCHR | Negative |
| Q02942 | KVCVPEGALESCHRMSQESD | Negative |
| Q02942 | SAVLAMPTPEGSPHHEIYKV | Negative |
| Q02942 | SASAVLAMPTPEGSPHHEIY | Negative |
| Q02942 | SPHHEIYKVCVPEGALESCH | Negative |
| Q02942 | PTPEGSPHHEIYKVCVPEGA | Negative |
| Q02942 | EIYKVCVPEGALESCHRMSQ | Negative |

|        |                      |          |
|--------|----------------------|----------|
| Q02942 | LFSASAVLAMPTPEGSPHHE | Negative |
| Q02942 | FSASAVLAMPTPEGSPHHEI | Negative |
| Q02942 | LLFSASAVLAMPTPEGSPHH | Negative |
| Q02942 | AMPTPEGSPHHEIYKVCVPE | Negative |
| Q02942 | AVLAMPTPEGSPHHEIYKVC | Negative |
| Q02942 | PEGSPHHEIYKVCVPEGALE | Negative |
| Q02942 | VLAMPTPEGSPHHEIYKVCV | Negative |
| Q02942 | IYKVCVPEGALESCHRMSQE | Negative |
| Q02942 | MPTPEGSPHHEIYKVCVPEG | Negative |
| Q02942 | HHEIYKVCVPEGALESCHRM | Negative |
| Q02942 | HEIYKVCVPEGALESCHRMS | Negative |
| Q02942 | EGSPHHEIYKVCVPEGALES | Negative |
| Q02942 | TLLFSASAVLAMPTPEGSPH | Negative |
| Q02988 | VWCLADLRAYVLVLLVISGL | Negative |
| Q02988 | VISGLYQGSDQLIPEKCGED | Negative |
| Q02988 | CLADLRAYVLVLLVISGLYQ | Negative |
| Q02988 | GSDQLIPEKCGEDCTPGWDC | Negative |
| Q02988 | RAYVLVLLVISGLYQGSDQL | Negative |
| Q02988 | IPEKCGEDCTPGWDCHFNSY | Negative |
| Q02988 | VLVLLVISGLYQGSDQLIPE | Negative |
| Q02988 | LRAYVLVLLVISGLYQGSDQ | Negative |
| Q02988 | YVLVLLVISGLYQGSDQLIP | Negative |
| Q02988 | VLLVISGLYQGSDQLIPEKC | Negative |
| Q02988 | PEKCGEDCTPGWDCHFNSYY | Negative |
| Q02988 | SGLYQGSDQLIPEKCGEDCT | Negative |
| Q02988 | QLIPEKCGEDCTPGWDCHFN | Negative |
| Q02988 | LVLLVISGLYQGSDQLIPEK | Negative |
| Q02988 | WCLADLRAYVLVLLVISGLY | Negative |
| Q02988 | GLYQGSDQLIPEKCGEDCTP | Negative |
| Q02988 | LVISGLYQGSDQLIPEKCGE | Negative |
| Q02988 | SDQLIPEKCGEDCTPGWDCH | Negative |
| Q02988 | MVWCLADLRAYVLVLLVISG | Negative |
| Q02988 | LIPEKCGEDCTPGWDCHFNS | Negative |
| Q02988 | LYQGSDQLIPEKCGEDCTPG | Negative |
| Q02988 | AYVLVLLVISGLYQGSDQLI | Negative |
| Q02988 | LADLRAYVLVLLVISGLYQG | Negative |
| Q02988 | ISGLYQGSDQLIPEKCGEDC | Negative |
| Q02988 | DLRAYVLVLLVISGLYQGSD | Negative |
| Q02988 | DQLIPEKCGEDCTPGWDCHF | Negative |
| Q02988 | QGSDQLIPEKCGEDCTPGWD | Negative |
| Q02988 | LLVISGLYQGSDQLIPEKCG | Negative |
| Q02988 | YQGSDQLIPEKCGEDCTPGW | Negative |
| Q03011 | LGLGLSVVAGSALAADQGHG | Negative |
| Q03011 | LNKLALVLGLGLSVVAGSAL | Negative |
| Q03011 | GTVKFVGSIIDAPCSITPDT | Negative |
| Q03011 | LSVVAGSALAADQGHGTVKF | Negative |

|        |                       |          |
|--------|-----------------------|----------|
| Q03011 | KLNKLALVLGLGLSVVAGSA  | Negative |
| Q03011 | SALAADQGHGTVKFVGSIID  | Negative |
| Q03011 | KLALVLGLGLSVVAGSALAA  | Negative |
| Q03011 | VVAGSALAADQGHGTVKFVG  | Negative |
| Q03011 | ADQGHGTVKFVGSIIDAPCS  | Negative |
| Q03011 | LVLGLGLSVVAGSALAADQG  | Negative |
| Q03011 | ALAADQGHGTVKFVGSIIIDA | Negative |
| Q03011 | LALVLGLGLSVVAGSALAAD  | Negative |
| Q03011 | TVKFVGSIIDAPCSITPDTE  | Negative |
| Q03011 | LAADQGHGTVKFVGSIIDAP  | Negative |
| Q03011 | GSALAADQGHGTVKFVGSII  | Negative |
| Q03011 | SVVAGSALAADQGHGTVKFV  | Negative |
| Q03011 | MKLNKLALVLGLGLSVVAGS  | Negative |
| Q03011 | GLSVVAGSALAADQGHGTVK  | Negative |
| Q03011 | AADQGHGTVKFVGSIIDAPC  | Negative |
| Q03011 | VAGSALAADQGHGTVKFVGS  | Negative |
| Q03011 | QGHGTVKFVGSIIDAPCSIT  | Negative |
| Q03011 | DQGHGTVKFVGSIIDAPCSI  | Negative |
| Q03011 | LGLSVVAGSALAADQGHGTV  | Negative |
| Q03011 | GHGTVKFVGSIIDAPCSITP  | Negative |
| Q03011 | ALVLGLGLSVVAGSALAADQ  | Negative |
| Q03011 | NKLALVLGLGLSVVAGSALA  | Negative |
| Q03011 | GLGLSVVAGSALAADQGHGT  | Negative |
| Q03011 | AGSALAADQGHGTVKFVGSII | Negative |
| Q03011 | HGTVKFVGSIIDAPCSITPD  | Negative |
| Q03035 | KAAPLRRTTLAMALGALGAL  | Negative |
| Q03035 | GALGALGAAPAAHADWNNQS  | Negative |
| Q03035 | LGALGAAPAAHADWNNQSII  | Negative |
| Q03035 | LAMALGALGALGAAPAAHAD  | Negative |
| Q03035 | SLSRIVKAAPLRRTTLAMAL  | Negative |
| Q03035 | LRRTTLAMALGALGALGAAP  | Negative |
| Q03035 | LSRIVKAAPLRRTTLAMALG  | Negative |
| Q03035 | LGAAPAAHADWNNQSIIKAG  | Negative |
| Q03035 | RRTTLAMALGALGALGAAPA  | Negative |
| Q03035 | TLAMALGALGALGAAPAAHA  | Negative |
| Q03035 | MALGALGALGAAPAAHADWN  | Negative |
| Q03035 | SRIVKAAPLRRTTLAMALGA  | Negative |
| Q03035 | IVKAAPLRRTTLAMALGALG  | Negative |
| Q03035 | TTLAMALGALGALGAAPAAH  | Negative |
| Q03035 | NMSLSRIVKAAPLRRTTLAM  | Negative |
| Q03035 | GAAPAAHADWNNQSIIKAGE  | Negative |
| Q03035 | MNMSLSRIVKAAPLRRTTLA  | Negative |
| Q03035 | MSLSRIVKAAPLRRTTLAMA  | Negative |
| Q03035 | AAPLRRTTLAMALGALGALG  | Negative |
| Q03035 | RTTLAMALGALGALGAAPAA  | Negative |
| Q03035 | GALGAAPAAHADWNNQSIIK  | Negative |

|        |                       |          |
|--------|-----------------------|----------|
| Q03035 | RIVKAAPLRRTTLAMALGAL  | Negative |
| Q03035 | PLRRTTLAMALGALGALGAA  | Negative |
| Q03035 | AMALGALGALGAAPAAHADW  | Negative |
| Q03035 | ALGAAPAAHADWNNQSIKA   | Negative |
| Q03035 | VKAAPLRRTTLAMALGALGA  | Negative |
| Q03035 | ALGALGAAPAAHADWNNQSI  | Negative |
| Q03035 | APLRRTTLAMALGALGALGA  | Negative |
| Q03035 | ALGALGALGAAPAAHADWNN  | Negative |
| Q03044 | SLVTSHLTEEIQASNDTENE  | Negative |
| Q03044 | CLMLAGLCSLVTSHTLTEEIQ | Negative |
| Q03044 | HLTEEIQASNDTENEYSSTR  | Negative |
| Q03044 | QASNDTENEYSSTRRISPYM  | Negative |
| Q03044 | AGLCSLVTSHTLTEEIQASND | Negative |
| Q03044 | STLSLCLMLAGLCSLVTSHTL | Negative |
| Q03044 | LAGLCSLVTSHTLTEEIQASN | Negative |
| Q03044 | LCSLVTSHTLTEEIQASNDTE | Negative |
| Q03044 | LTEEIQASNDTENEYSSTRR  | Negative |
| Q03044 | SNDTENEYSSTRRISPYMTD  | Negative |
| Q03044 | TEEIQASNDTENEYSSTRRI  | Negative |
| Q03044 | GLCSLVTSHTLTEEIQASNDT | Negative |
| Q03044 | LMLAGLCSLVTSHTLTEEIQA | Negative |
| Q03044 | TLSLCLMLAGLCSLVTSHTLT | Negative |
| Q03044 | EIQASNDTENEYSSTRRISP  | Negative |
| Q03044 | MLAGLCSLVTSHTLTEEIQAS | Negative |
| Q03044 | MMPSTLSLCLMLAGLCSLV   | Negative |
| Q03044 | SHLTEEIQASNDTENEYSST  | Negative |
| Q03044 | LCLMLAGLCSLVTSHTLTEEI | Negative |
| Q03044 | LSLCLMLAGLCSLVTSHTL   | Negative |
| Q03044 | IQASNDTENEYSSTRRISPY  | Negative |
| Q03044 | TSHLTEEIQASNDTENEYSS  | Negative |
| Q03044 | VTSHLTEEIQASNDTENEYS  | Negative |
| Q03044 | CSLVTSHTLTEEIQASNDTEN | Negative |
| Q03044 | ASNDTENEYSSTRRISPYMT  | Negative |
| Q03044 | MPSTLSLCLMLAGLCSLVTS  | Negative |
| Q03044 | PSTLSLCLMLAGLCSLVTS   | Negative |
| Q03044 | EEIQASNDTENEYSSTRRIS  | Negative |
| Q03044 | LVTSHLTEEIQASNDTENEY  | Negative |
| Q03178 | VASALVATSLAAYAPKDPWS  | Negative |
| Q03178 | KDPWSTLTPSATYKGGITDY  | Negative |
| Q03178 | ATSLAAYAPKDPWSTLTPSA  | Negative |
| Q03178 | LVATSLAAYAPKDPWSTLTP  | Negative |
| Q03178 | APKDPWSTLTPSATYKGGIT  | Negative |
| Q03178 | YAPKDPWSTLTPSATYKGGI  | Negative |
| Q03178 | WSTLTPSATYKGGITDYSST  | Negative |
| Q03178 | DPWSTLTPSATYKGGITDYS  | Negative |
| Q03178 | YKKSLVASALVATSLAAYAP  | Negative |

|        |                      |          |
|--------|----------------------|----------|
| Q03178 | TPSATYKGGITDYSSTFGIA | Negative |
| Q03178 | PKDPWSTLTPSATYKGGITD | Negative |
| Q03178 | SALVATSLAAYAPKDPWSTL | Negative |
| Q03178 | LTPSATYKGGITDYSSTFGI | Negative |
| Q03178 | LVASALVATSLAAYAPKDPW | Negative |
| Q03178 | QYKKSLVASALVATSLAAYA | Negative |
| Q03178 | KSLVASALVATSLAAYAPKD | Negative |
| Q03178 | MQYKKSLVASALVATSLAAY | Negative |
| Q03178 | AAYPKDPWSTLTPSATYKG  | Negative |
| Q03178 | ASALVATSLAAYAPKDPWST | Negative |
| Q03178 | VATSLAAYAPKDPWSTLTPS | Negative |
| Q03178 | TSLAAYAPKDPWSTLTPSAT | Negative |
| Q03178 | PWSTLTPSATYKGGITDYSS | Negative |
| Q03178 | ALVATSLAAYAPKDPWSTLT | Negative |
| Q03178 | AYAPKDPWSTLTPSATYKGG | Negative |
| Q03178 | STLTPSATYKGGITDYSSTF | Negative |
| Q03178 | SLVASALVATSLAAYAPKDP | Negative |
| Q03178 | SLAAYAPKDPWSTLTPSATY | Negative |
| Q03178 | TLTPSATYKGGITDYSSTFG | Negative |
| Q03178 | LAAYAPKDPWSTLTPSATYK | Negative |
| Q03180 | PKDPWSTLTPSATYKGGITD | Negative |
| Q03180 | KDPWSTLTPSATYKGGITDY | Negative |
| Q03180 | STLTPSATYKGGITDYSSSF | Negative |
| Q03180 | AAYPKDPWSTLTPSATYKG  | Negative |
| Q03180 | VSALAATSLAAYAPKDPWST | Negative |
| Q03180 | ATSLAAYAPKDPWSTLTPSA | Negative |
| Q03180 | TSLAAYAPKDPWSTLTPSAT | Negative |
| Q03180 | LVVSALAATSLAAYAPKDPW | Negative |
| Q03180 | ALAATSLAAYAPKDPWSTLT | Negative |
| Q03180 | LAAYAPKDPWSTLTPSATYK | Negative |
| Q03180 | MQYKKPLVVSALAATSLAAY | Negative |
| Q03180 | DPWSTLTPSATYKGGITDYS | Negative |
| Q03180 | LAATSLAAYAPKDPWSTLTP | Negative |
| Q03180 | SALAATSLAAYAPKDPWSTL | Negative |
| Q03180 | VVSALAATSLAAYAPKDPWS | Negative |
| Q03180 | AATSLAAYAPKDPWSTLTPS | Negative |
| Q03180 | LTPSATYKGGITDYSSSFGI | Negative |
| Q03180 | TPSATYKGGITDYSSSFGIA | Negative |
| Q03180 | KPLVVSALAATSLAAYAPKD | Negative |
| Q03180 | PWSTLTPSATYKGGITDYSS | Negative |
| Q03180 | TLTPSATYKGGITDYSSSFG | Negative |
| Q03180 | YAPKDPWSTLTPSATYKGGI | Negative |
| Q03180 | PLVVSALAATSLAAYAPKDP | Negative |
| Q03180 | AYAPKDPWSTLTPSATYKGG | Negative |
| Q03180 | WSTLTPSATYKGGITDYSSS | Negative |
| Q03180 | SLAAYAPKDPWSTLTPSATY | Negative |

|        |                       |          |
|--------|-----------------------|----------|
| Q03180 | YKKPLVVSALAATSLAAYAP  | Negative |
| Q03180 | QYKKPLVVSALAATSLAAYA  | Negative |
| Q03180 | APKDPWSTLTPSATYKGGIT  | Negative |
| Q03352 | TAKPRDIPVNPICIYRNPEK  | Negative |
| Q03352 | CTAKPRDIPVNPICIYRNPE  | Negative |
| Q03352 | YAVEDICTAKPRDIPVNPIC  | Negative |
| Q03352 | LGHGIPAPYAVEDICTAKPR  | Negative |
| Q03352 | VSLRPLGHGIPAPYAVEDIC  | Negative |
| Q03352 | PYAVEDICTAKPRDIPVNPI  | Negative |
| Q03352 | AVEDICTAKPRDIPVNPICI  | Negative |
| Q03352 | GVSLRPLGHGIPAPYAVEDI  | Negative |
| Q03352 | HLFIGVSLRPLGHGIPAPYA  | Negative |
| Q03352 | VEDICTAKPRDIPVNPICIY  | Negative |
| Q03352 | RPLGHGIPAPYAVEDICTAK  | Negative |
| Q03352 | PRDIPVNPICIYRNPEKKPQ  | Negative |
| Q03352 | LRPLGHGIPAPYAVEDICTA  | Negative |
| Q03352 | SLRPLGHGIPAPYAVEDICT  | Negative |
| Q03352 | EDICTAKPRDIPVNPICIYR  | Negative |
| Q03352 | PLGHGIPAPYAVEDICTAKP  | Negative |
| Q03352 | DICTAKPRDIPVNPICIYRN  | Negative |
| Q03352 | IPAPYAVEDICTAKPRDIPV  | Negative |
| Q03352 | FIGVSLRPLGHGIPAPYAVE  | Negative |
| Q03352 | MHLFIGVSLRPLGHGIPAPY  | Negative |
| Q03352 | KPRDIPVNPICIYRNPEKKP  | Negative |
| Q03352 | AKPRDIPVNPICIYRNPEKK  | Negative |
| Q03352 | HGIPAPYAVEDICTAKPRDI  | Negative |
| Q03352 | APYAVEDICTAKPRDIPVNP  | Negative |
| Q03352 | PAPYAVEDICTAKPRDIPVN  | Negative |
| Q03352 | GHGIPAPYAVEDICTAKPRD  | Negative |
| Q03352 | ICTAKPRDIPVNPICIYRNP  | Negative |
| Q03352 | IGVSLRPLGHGIPAPYAVED  | Negative |
| Q03352 | GIPAPYAVEDICTAKPRDIP  | Negative |
| Q03383 | TQAFYMFGEFSRTRLGDTI   | Negative |
| Q03383 | LVTLVCGTQAFYMFGEFSR   | Negative |
| Q03383 | GTQAFYMFGEFSRTRLGDT   | Negative |
| Q03383 | GDTIDKTSLKILKESYNLAD  | Negative |
| Q03383 | YMFGHEFSRTRLGDTIDKTS  | Negative |
| Q03383 | EFSTRTRLGDTIDKTSLKILK | Negative |
| Q03383 | LGDTIDKTSLKILKESYNLA  | Negative |
| Q03383 | RLGDTIDKTSLKILKESYNL  | Negative |
| Q03383 | LLLVTLCGTQAFYMFGEF    | Negative |
| Q03383 | HEFSRTRLGDTIDKTSLKIL  | Negative |
| Q03383 | FSRTRLGDTIDKTSLKILKE  | Negative |
| Q03383 | TLVCGTQAFYMFGEFSRTR   | Negative |
| Q03383 | SRTRLGDTIDKTSLKILKES  | Negative |
| Q03383 | TRLGDTIDKTSLKILKESYN  | Negative |



|        |                       |          |
|--------|-----------------------|----------|
| Q03383 | MFGHEFSRTRLGDTIDKTSL  | Negative |
| Q03383 | LLVTLVCGTQAFYMFHGHEFS | Negative |
| Q03383 | VCGTQAFYMFHGHEFSRTRLG | Negative |
| Q03383 | MDKLLLVLVTLVCGTQAFYMF | Negative |
| Q03383 | VTLVCGTQAFYMFHGHEFSRT | Negative |
| Q03383 | LVCGTQAFYMFHGHEFSRTRL | Negative |
| Q03383 | CGTQAFYMFHGHEFSRTRLGD | Negative |
| Q03383 | FYMFHGHEFSRTRLGDTIDKT | Negative |
| Q03383 | RTRLGDTIDKTSCLKILKESY | Negative |
| Q03383 | AFYMFHGHEFSRTRLGDTIDK | Negative |
| Q03383 | GHEFSRTRLGDTIDKTSCLKI | Negative |
| Q03383 | KLLLLVTLVCGTQAFYMFHGH | Negative |
| Q03383 | LLLLVTLVCGTQAFYMFHGH  | Negative |
| Q03383 | QAFYMFHGHEFSRTRLGDTID | Negative |
| Q03383 | FGHEFSRTRLGDTIDKTSCLK | Negative |
| Q03405 | QCKTNGDCRVEECALGQDLC  | Negative |
| Q03405 | HTCVPASWGLRCMQCKTNGD  | Negative |
| Q03405 | TCVPASWGLRCMQCKTNGDC  | Negative |
| Q03405 | GLRCMQCKTNGDCRVEECAL  | Negative |
| Q03405 | LPLLLLHTCVPASWGLRCM   | Negative |
| Q03405 | LHTCVPASWGLRCMQCKTNG  | Negative |
| Q03405 | WGLRCMQCKTNGDCRVEECA  | Negative |
| Q03405 | LLHTCVPASWGLRCMQCKT   | Negative |
| Q03405 | TNGDCRVEECALGQDLCRTT  | Negative |
| Q03405 | VPASWGLRCMQCKTNGDCRV  | Negative |
| Q03405 | GHPPLLPLLLLHTCVPASW   | Negative |
| Q03405 | HPPLLPLLLLHTCVPASWG   | Negative |
| Q03405 | MGHPPLLPLLLLHTCVPAS   | Negative |
| Q03405 | MQCKTNGDCRVEECALGQDL  | Negative |
| Q03405 | CVPASWGLRCMQCKTNGDCR  | Negative |
| Q03405 | LLHTCVPASWGLRCMQCKTN  | Negative |
| Q03405 | RCMQCKTNGDCRVEECALGQ  | Negative |
| Q03405 | LLLLHTCVPASWGLRCMQC   | Negative |
| Q03405 | LLPLLLLHTCVPASWGLRC   | Negative |
| Q03405 | CKTNGDCRVEECALGQDLCR  | Negative |
| Q03405 | SWGLRCMQCKTNGDCRVEEC  | Negative |
| Q03405 | PASWGLRCMQCKTNGDCRVE  | Negative |
| Q03405 | LRCMQCKTNGDCRVEECALG  | Negative |
| Q03405 | PPLLPLLLLHTCVPASWGL   | Negative |
| Q03405 | LLLLHTCVPASWGLRCMQCK  | Negative |
| Q03405 | CMQCKTNGDCRVEECALGQD  | Negative |
| Q03405 | ASWGLRCMQCKTNGDCRVEE  | Negative |
| Q03405 | PLLPLLLLHTCVPASWGLR   | Negative |
| Q03405 | KTNGDCRVEECALGQDLCRT  | Negative |
| Q03472 | PALCLLGVLFLHCTPVLCG   | Negative |
| Q03472 | LGVLFLHCTPVLCGCDNPP   | Negative |

|        |                       |          |
|--------|-----------------------|----------|
| Q03472 | HCTPVLCGCDNPPVVAHGGH  | Negative |
| Q03472 | GCDNPPVVAHGGHTQIIIGLF | Negative |
| Q03472 | RIFPALCLLGVLFLHCTPV   | Negative |
| Q03472 | QRIFPALCLLGVLFLHCTP   | Negative |
| Q03472 | LFLHCTPVLCGCDNPPVVA   | Negative |
| Q03472 | LHCTPVLCGCDNPPVVAHGH  | Negative |
| Q03472 | FPALCLLGVLFLHCTPVLC   | Negative |
| Q03472 | ALCLLGVLFLHCTPVLCGC   | Negative |
| Q03472 | CGCDNPPVVAHGGHTQIIIGL | Negative |
| Q03472 | LQRIFPALCLLGVLFLHCT   | Negative |
| Q03472 | TPVLCGCDNPPVVAHGGHTQ  | Negative |
| Q03472 | PNLQRIFPALCLLGVLFLH   | Negative |
| Q03472 | CDNPPVVAHGGHTQIIIGLFG | Negative |
| Q03472 | IFPALCLLGVLFLHCTPVLC  | Negative |
| Q03472 | LLHCTPVLCGCDNPPVVAHG  | Negative |
| Q03472 | NLQRIFPALCLLGVLFLHC   | Negative |
| Q03472 | PVLCGCDNPPVVAHGGHTQI  | Negative |
| Q03472 | FLHCTPVLCGCDNPPVVAH   | Negative |
| Q03472 | VLFLHCTPVLCGCDNPPVV   | Negative |
| Q03472 | LCLLGVLFLHCTPVLCGCD   | Negative |
| Q03472 | PPNLQRIFPALCLLGVLFL   | Negative |
| Q03472 | CLLGVLFLHCTPVLCGCDN   | Negative |
| Q03472 | CTPVLCGCDNPPVVAHGGHT  | Negative |
| Q03472 | MPPNLQRIFPALCLLGVLFL  | Negative |
| Q03472 | VLCGCDNPPVVAHGGHTQII  | Negative |
| Q03472 | LCGCDNPPVVAHGGHTQIIG  | Negative |
| Q03472 | GVLFLHCTPVLCGCDNPPV   | Negative |
| Q04064 | TSVTLYGIIDTGIGYNDVDF  | Negative |
| Q04064 | FAGAAQAETSVTLYGIIDTG  | Negative |
| Q04064 | GAAQAETSVTLYGIIDTGIG  | Negative |
| Q04064 | AETSVTLYGIIDTGIGYNDV  | Negative |
| Q04064 | AAQAETSVTLYGIIDTGIGY  | Negative |
| Q04064 | GFAGAAQAETSVTLYGIIDT  | Negative |
| Q04064 | IDTGIGYNDVDFKVKGANAD  | Negative |
| Q04064 | KKTLAAALLAGFAGAAQAE   | Negative |
| Q04064 | TLLAAALLAGFAGAAQAETS  | Negative |
| Q04064 | ETSVTLYGIIDTGIGYNDVD  | Negative |
| Q04064 | LLAGFAGAAQAETSVTLYGI  | Negative |
| Q04064 | AGFAGAAQAETSVTLYGIID  | Negative |
| Q04064 | KTLAAALLAGFAGAAQAET   | Negative |
| Q04064 | AAALLAGFAGAAQAETSVTL  | Negative |
| Q04064 | AQAETSVTLYGIIDTGIGYN  | Negative |
| Q04064 | VTLYGIIDTGIGYNDVDFKV  | Negative |
| Q04064 | QAETSVTLYGIIDTGIGYND  | Negative |
| Q04064 | MKKTLAAALLAGFAGAAQA   | Negative |
| Q04064 | TLYGIIDTGIGYNDVDFKVK  | Negative |

|        |                       |          |
|--------|-----------------------|----------|
| Q04064 | GIIDTGIGYNDVDFKVKGAN  | Negative |
| Q04064 | YGIIDTGIGYNDVDFKVKGA  | Negative |
| Q04064 | AGAAQAETSVTLYGIIDTGI  | Negative |
| Q04064 | LYGIIDTGIGYNDVDFKVKG  | Negative |
| Q04064 | ALLAGFAGAAQAETSVTLYG  | Negative |
| Q04064 | LAGFAGAAQAETSVTLYGII  | Negative |
| Q04064 | SVTLYGIIDTGIGYNDVDFK  | Negative |
| Q04064 | AALLAGFAGAAQAETSVTLY  | Negative |
| Q04064 | LLAAALLAGFAGAAQAETSV  | Negative |
| Q04064 | IIDTGIGYNDVDFKVKGANA  | Negative |
| Q04457 | ILINACWAGPIVETNYGKVE  | Negative |
| Q04457 | IEYEGAEVFLAIPFAKPPVD  | Negative |
| Q04457 | NYGKVEGIEYEGAEVFLAIP  | Negative |
| Q04457 | VEGIEYEGAEVFLAIPFAKP  | Negative |
| Q04457 | GPIVETNYGKVEGIEYEGAE  | Negative |
| Q04457 | GIEYEGAEVFLAIPFAKPPV  | Negative |
| Q04457 | NACWAGPIVETNYGKVEGIE  | Negative |
| Q04457 | VETNYGKVEGIEYEGAEVFL  | Negative |
| Q04457 | GKVEGIEYEGAEVFLAIPFA  | Negative |
| Q04457 | YGKVEGIEYEGAEVFLAIPF  | Negative |
| Q04457 | INACWAGPIVETNYGKVEGI  | Negative |
| Q04457 | VILINACWAGPIVETNYGKV  | Negative |
| Q04457 | LVSVILINACWAGPIVETNY  | Negative |
| Q04457 | KVEGIEYEGAEVFLAIPFAK  | Negative |
| Q04457 | AGPIVETNYGKVEGIEYEGA  | Negative |
| Q04457 | IFLVSVILINACWAGPIVET  | Negative |
| Q04457 | IVETNYGKVEGIEYEGAEVF  | Negative |
| Q04457 | EGIEYEGAEVFLAIPFAKPP  | Negative |
| Q04457 | SVILINACWAGPIVETNYGK  | Negative |
| Q04457 | WAGPIVETNYGKVEGIEYEG  | Negative |
| Q04457 | ETNYGKVEGIEYEGAEVFLA  | Negative |
| Q04457 | PIVETNYGKVEGIEYEGAEV  | Negative |
| Q04457 | LINACWAGPIVETNYGKVEG  | Negative |
| Q04457 | CWAGPIVETNYGKVEGIEYE  | Negative |
| Q04457 | TNYGKVEGIEYEGAEVFLAI  | Negative |
| Q04457 | VSVILINACWAGPIVETNYG  | Negative |
| Q04457 | FLVSVILINACWAGPIVETN  | Negative |
| Q04457 | ACWAGPIVETNYGKVEGIEY  | Negative |
| Q04457 | MRIFLVSVILINACWAGPIV  | Negative |
| Q04672 | KCKETEEVEEDPELVTCCKHQ | Negative |
| Q04672 | GMRTKLSLAIFFFFLALFS   | Negative |
| Q04672 | MRTKLSLAIFFFFLALFSN   | Negative |
| Q04672 | KETEEVEEDPELVTCCKHCQ  | Negative |
| Q04672 | LFSNLAFGKCKETEEVEEDP  | Negative |
| Q04672 | KLSLAIFFFFLALFSNLAF   | Negative |
| Q04672 | SNLAFGKCKETEEVEEDPEL  | Negative |

|        |                      |          |
|--------|----------------------|----------|
| Q04672 | FLLALFSNLAFGKCKETEV  | Negative |
| Q04672 | LAFGKCKETEVEEEDPELVT | Negative |
| Q04672 | AFGKCKETEVEEEDPELVT  | Negative |
| Q04672 | SLAIFFFLLALFSNLAFGK  | Negative |
| Q04672 | FFFLLALFSNLAFGKCKET  | Negative |
| Q04672 | TKLSLAIFFFLLALFSNLA  | Negative |
| Q04672 | LALFSNLAFGKCKETEVEEE | Negative |
| Q04672 | CKETEVEEEDPELVTCKHQC | Negative |
| Q04672 | MGMRTKLSLAIFFFLLALF  | Negative |
| Q04672 | AIFFFLLALFSNLAFGKCK  | Negative |
| Q04672 | FFLLALFSNLAFGKCKETE  | Negative |
| Q04672 | GKCKETEVEEEDPELVTCKH | Negative |
| Q04672 | RTKLSLAIFFFLLALFSNL  | Negative |
| Q04672 | ALFSNLAFGKCKETEVEEED | Negative |
| Q04672 | LSLAIFFFLLALFSNLAFG  | Negative |
| Q04672 | LAIFFFLLALFSNLAFGKC  | Negative |
| Q04672 | LLALFSNLAFGKCKETEVEE | Negative |
| Q04672 | FSNLAFGKCKETEVEEEDPE | Negative |
| Q04672 | IFFFLLALFSNLAFGKCKE  | Negative |
| Q04672 | FGKCKETEVEEEDPELVTCK | Negative |
| Q04672 | ETEVEEEDPELVTCKHQCQQ | Negative |
| Q04672 | NLAFGKCKETEVEEEDPELV | Negative |
| Q04681 | MKLSKIALAAALVFGINSVA | Negative |
| Q04681 | TPAPKVSSTKGEIQLKGEIV | Negative |
| Q04681 | LVFGINSVATAENETPAPKV | Negative |
| Q04681 | ALVFGINSVATAENETPAPK | Negative |
| Q04681 | LSKIALAAALVFGINSVATA | Negative |
| Q04681 | AALVFGINSVATAENETPAP | Negative |
| Q04681 | TAENETPAPKVSSTKGEIQL | Negative |
| Q04681 | KIALAAALVFGINSVATAEN | Negative |
| Q04681 | KVSSTKGEIQLKGEIVNSAC | Negative |
| Q04681 | AAALVFGINSVATAENETPA | Negative |
| Q04681 | PAPKVSSTKGEIQLKGEIVN | Negative |
| Q04681 | IALAAALVFGINSVATAENE | Negative |
| Q04681 | PKVSSTKGEIQLKGEIVNSA | Negative |
| Q04681 | SVATAENETPAPKVSSTKGE | Negative |
| Q04681 | APKVSSTKGEIQLKGEIVNS | Negative |
| Q04681 | FGINSVATAENETPAPKVSS | Negative |
| Q04681 | VATAENETPAPKVSSTKGEI | Negative |
| Q04681 | NETPAPKVSSTKGEIQLKGE | Negative |
| Q04681 | NSVATAENETPAPKVSSTKG | Negative |
| Q04681 | INSVATAENETPAPKVSSTK | Negative |
| Q04681 | ETPAPKVSSTKGEIQLKGEI | Negative |
| Q04681 | ENETPAPKVSSTKGEIQLKG | Negative |
| Q04681 | KLSKIALAAALVFGINSVAT | Negative |
| Q04681 | ATAENETPAPKVSSTKGEIQ | Negative |

|        |                       |          |
|--------|-----------------------|----------|
| Q04681 | AENETPAPKVSSTKGEIQLK  | Negative |
| Q04681 | SKIALAAALVFGINSVATAE  | Negative |
| Q04681 | VFGINSVATAENETPAPKVS  | Negative |
| Q04681 | GINSVATAENETPAPKVSST  | Negative |
| Q04681 | ALAAALVFGINSVATAENET  | Negative |
| Q04756 | LLLLPRGFQPPGGNRTE     | Negative |
| Q04756 | LLLLLLPRGFQPPGGNRTE   | Negative |
| Q04756 | PFLLLLLLLLLLPRGFQPP   | Negative |
| Q04756 | GLGPFLLLLLLLLLLPRGFQ  | Negative |
| Q04756 | LLLLLLPRGFQPPGGNRT    | Negative |
| Q04756 | WAWVSPWPPLGLPFLLL     | Negative |
| Q04756 | LPRGFQPPGGNRTESEPN    | Negative |
| Q04756 | GRWAWVSPWPPLGLPFL     | Negative |
| Q04756 | VSPWPPLGLPFLLLLLLL    | Negative |
| Q04756 | PRGFQPPGGNRTESEPN     | Negative |
| Q04756 | FLLLLLLLLLLPRGFQPPG   | Negative |
| Q04756 | WVSPWPPLGLPFLLLLLLL   | Negative |
| Q04756 | SPWPPLGLPFLLLLLLLLL   | Negative |
| Q04756 | GPFLLLLLLLLLLPRGFQPP  | Negative |
| Q04756 | WPPGLPFLLLLLLLLLLP    | Negative |
| Q04756 | PSPWPPLGLPFLLLLLLLLL  | Negative |
| Q04756 | LLLLLLLLLPRGFQPPGG    | Negative |
| Q04756 | MGRWAWVSPWPPLGLPFL    | Negative |
| Q04756 | LGPFLLLLLLLLLLPRGFQPP | Negative |
| Q04756 | AWVSPWPPLGLPFLLLLL    | Negative |
| Q04756 | PGLPFLLLLLLLLLLPRGF   | Negative |
| Q04756 | PWPPGLPFLLLLLLLLLLL   | Negative |
| Q04756 | RWAWVSPWPPLGLPFLLL    | Negative |
| Q04756 | LLLLLLLLLPRGFQPPGGNR  | Negative |
| Q04756 | LLPRGFQPPGGNRTESEPE   | Negative |
| Q04756 | PPGLPFLLLLLLLLLLPR    | Negative |
| Q04756 | PPGLPFLLLLLLLLLLPRG   | Negative |
| Q04756 | LLLPRGFQPPGGNRTESEPE  | Negative |
| Q04756 | LLLLLPRGFQPPGGNRTESE  | Negative |
| Q04791 | SLILTAGITALVATGQKAEQ  | Negative |
| Q04791 | LSLILTAGITALVATGQKAE  | Negative |
| Q04791 | EQPEVVTNYGSRGYQVKVN   | Negative |
| Q04791 | ATGQKAEQPEVVTNYGSRG   | Negative |
| Q04791 | AEQPEVVTNYGSRGYQVKV   | Negative |
| Q04791 | ALVATGQKAEQPEVVTNYGS  | Negative |
| Q04791 | TLLSLILTAGITALVATGQK  | Negative |
| Q04791 | GITALVATGQKAEQPEVVTN  | Negative |
| Q04791 | QKAEQPEVVTNYGSRGYQV   | Negative |
| Q04791 | NTLLSLILTAGITALVATGQ  | Negative |
| Q04791 | QPEVVTNYGSRGYQVKVNA   | Negative |
| Q04791 | TEKNTLLSLILTAGITALVA  | Negative |

|        |                      |          |
|--------|----------------------|----------|
| Q04791 | LLSLILTAGITALVATGQKA | Negative |
| Q04791 | TAGITALVATGQKAEQPEVV | Negative |
| Q04791 | EKNTLLSLILTAGITALVAT | Negative |
| Q04791 | KNTLLSLILTAGITALVATG | Negative |
| Q04791 | PEVVTNYGSVRGYQVKVNAA | Negative |
| Q04791 | ILTAGITALVATGQKAEQPE | Negative |
| Q04791 | AGITALVATGQKAEQPEVVT | Negative |
| Q04791 | ATEKNTLLSLILTAGITALV | Negative |
| Q04791 | ITALVATGQKAEQPEVVTNY | Negative |
| Q04791 | LVATGQKAEQPEVVTNYGSV | Negative |
| Q04791 | TGQKAEQPEVVTNYGSVRGY | Negative |
| Q04791 | VATGQKAEQPEVVTNYGSVR | Negative |
| Q04791 | GQKAEQPEVVTNYGSVRGYQ | Negative |
| Q04791 | MATEKNTLLSLILTAGITAL | Negative |
| Q04791 | TALVATGQKAEQPEVVTNYG | Negative |
| Q04791 | LTAGITALVATGQKAEQPEV | Negative |
| Q04791 | KAEQPEVVTNYGSVRGYQVK | Negative |
| Q04962 | LGSLLVSLESALSAPPPWKA | Negative |
| Q04962 | RRHRAEEFTVGLTVTGEPCY | Negative |
| Q04962 | LESALSAPPPWKAPKERRHR | Negative |
| Q04962 | GSLLSLESALSAPPPWKAP  | Negative |
| Q04962 | GRLLLSLLVSLESALSAPP  | Negative |
| Q04962 | PPPWKAPKERRHRAEEFTVG | Negative |
| Q04962 | PPWKAPKERRHRAEEFTVGL | Negative |
| Q04962 | ERRHRAEEFTVGLTVTGEPC | Negative |
| Q04962 | RLLLGSLLVSLESALSAPP  | Negative |
| Q04962 | APKERRHRAEEFTVGLTVTG | Negative |
| Q04962 | HRAEEFTVGLTVTGEPCYFP | Negative |
| Q04962 | PKERRHRAEEFTVGLTVTGE | Negative |
| Q04962 | SLESALSAPPPWKAPKERRH | Negative |
| Q04962 | SAPPPWKAPKERRHRAEEFT | Negative |
| Q04962 | ESALSAPPPWKAPKERRHRA | Negative |
| Q04962 | RHRAEEFTVGLTVTGEPCYF | Negative |
| Q04962 | LLVSLESALSAPPPWKAPKE | Negative |
| Q04962 | LSAPPPWKAPKERRHRAEEF | Negative |
| Q04962 | SLLVSLESALSAPPPWKAPK | Negative |
| Q04962 | KAPKERRHRAEEFTVGLTVT | Negative |
| Q04962 | VSLESALSAPPPWKAPKERR | Negative |
| Q04962 | LLLSLLVSLESALSAPPPW  | Negative |
| Q04962 | LVSLESALSAPPPWKAPKER | Negative |
| Q04962 | WKAPKERRHRAEEFTVGLTV | Negative |
| Q04962 | KERRHRAEEFTVGLTVTGE  | Negative |
| Q04962 | APPPWKAPKERRHRAEEFTV | Negative |
| Q04962 | PWKAPKERRHRAEEFTVGLT | Negative |
| Q04962 | SALSAPPPWKAPKERRHRAE | Negative |
| Q04962 | ALSAPPPWKAPKERRHRAEE | Negative |

|        |                      |          |
|--------|----------------------|----------|
| Q05156 | MKRRTTAVLTLTALLGTALT | Negative |
| Q05156 | GAEEVEQVRNGTFDTTTDPW | Negative |
| Q05156 | EEVEQVRNGTFDTTTDPWWT | Negative |
| Q05156 | ALPVQQAGAEVEQVRNGTF  | Negative |
| Q05156 | LPVQQAGAEVEQVRNGTFD  | Negative |
| Q05156 | ALLGTALTALPVQQAGAEV  | Negative |
| Q05156 | VQQAGAEVEQVRNGTFDTT  | Negative |
| Q05156 | AEVEQVRNGTFDTTTDPWW  | Negative |
| Q05156 | RRTTAVLTLTALLGTALTAL | Negative |
| Q05156 | LTALLGTALTALPVQQAGAE | Negative |
| Q05156 | KRRTTAVLTLTALLGTALTA | Negative |
| Q05156 | VLTLTALLGTALTALPVQQA | Negative |
| Q05156 | PVQQAGAEVEQVRNGTFDT  | Negative |
| Q05156 | QQAGAEVEQVRNGTFDTTT  | Negative |
| Q05156 | TLTALLGTALTALPVQQAGA | Negative |
| Q05156 | LLGTALTALPVQQAGAEVE  | Negative |
| Q05156 | TTAVLTLTALLGTALTALPV | Negative |
| Q05156 | QAGAEVEQVRNGTFDTTTD  | Negative |
| Q05156 | TALTALPVQQAGAEVEQVR  | Negative |
| Q05156 | ALTALPVQQAGAEVEQVRN  | Negative |
| Q05156 | RTTAVLTLTALLGTALTALP | Negative |
| Q05156 | LTLTALLGTALTALPVQQAG | Negative |
| Q05156 | LTALPVQQAGAEVEQVRNG  | Negative |
| Q05156 | AGAEVEQVRNGTFDTTTDP  | Negative |
| Q05156 | AVLTLTALLGTALTALPVQQ | Negative |
| Q05156 | GTALTALPVQQAGAEVEQV  | Negative |
| Q05156 | TALLGTALTALPVQQAGAE  | Negative |
| Q05156 | TAVLTLTALLGTALTALPVQ | Negative |
| Q05156 | TALPVQQAGAEVEQVRNGT  | Negative |
| Q05186 | ALRAKPTVRKERVVRPDSEL | Negative |
| Q05186 | RLGLALGLLLALVLALRAKP | Negative |
| Q05186 | VRKERVVRPDSELGERPPED | Negative |
| Q05186 | GLALGLLLALVLALRAKPTV | Negative |
| Q05186 | MARGGRLGLALGLLLALVLA | Negative |
| Q05186 | LALVLALRAKPTVRKERVVR | Negative |
| Q05186 | TVRKERVVRPDSELGERPPE | Negative |
| Q05186 | VLALRAKPTVRKERVVRPDS | Negative |
| Q05186 | RGGRLGLALGLLLALVLALR | Negative |
| Q05186 | RKERVVRPDSELGERPPEDN | Negative |
| Q05186 | PTVRKERVVRPDSELGERPP | Negative |
| Q05186 | LGLLLALVLALRAKPTVRKE | Negative |
| Q05186 | LRAKPTVRKERVVRPDSELG | Negative |
| Q05186 | RAKPTVRKERVVRPDSELGE | Negative |
| Q05186 | ALVLALRAKPTVRKERVVRP | Negative |
| Q05186 | AKPTVRKERVVRPDSELGER | Negative |
| Q05186 | ARGGRLGLALGLLLALVLAL | Negative |

|        |                      |          |
|--------|----------------------|----------|
| Q05186 | GGRLGLALGLLLALVLALRA | Negative |
| Q05186 | LALRAKPTVRKERVVRPDSE | Negative |
| Q05186 | KPTVRKERVVRPDSELGERP | Negative |
| Q05186 | ERVVRPDSELGERPPEDNQS | Negative |
| Q05186 | LLLALVLALRAKPTVRKERV | Negative |
| Q05186 | ALGLLLALVLALRAKPTVRK | Negative |
| Q05186 | GRLGLALGLLLALVLALRAK | Negative |
| Q05186 | LVLALRAKPTVRKERVVRPD | Negative |
| Q05186 | LLALVLALRAKPTVRKERVV | Negative |
| Q05186 | GLLLALVLALRAKPTVRKER | Negative |
| Q05186 | LGLALGLLLALVLALRAKPT | Negative |
| Q05186 | KERVVRPDSELGERPPEDNQ | Negative |
| Q05202 | QKRLAPRLLCVMIGAALGTL | Negative |
| Q05202 | GAALGTLSASSWAAAATDST | Negative |
| Q05202 | VMIGAALGTLSASSWAAAAT | Negative |
| Q05202 | CVMIGAALGTLSASSWAAAA | Negative |
| Q05202 | PRLLCVMIGAALGTLSASSW | Negative |
| Q05202 | TLSASSWAAAATDSTAENAK | Negative |
| Q05202 | APQKRLAPRLLCVMIGAALG | Negative |
| Q05202 | LCVMIGAALGTLSASSWAAA | Negative |
| Q05202 | MNQTISSRAPQKRLAPRLLC | Negative |
| Q05202 | APRLLCVMIGAALGTLSASS | Negative |
| Q05202 | SSRAPQKRLAPRLLCVMIGA | Negative |
| Q05202 | PQKRLAPRLLCVMIGAALGT | Negative |
| Q05202 | AALGTLSASSWAAAATDSTA | Negative |
| Q05202 | IGAALGTLSASSWAAAATDS | Negative |
| Q05202 | TISSRAPQKRLAPRLLCVMI | Negative |
| Q05202 | ALGTLSASSWAAAATDSTAE | Negative |
| Q05202 | RLAPRLLCVMIGAALGTLSA | Negative |
| Q05202 | LLCVMIGAALGTLSASSWAA | Negative |
| Q05202 | QTISSRAPQKRLAPRLLCVM | Negative |
| Q05202 | LAPRLLCVMIGAALGTLSAS | Negative |
| Q05202 | RLLCVMIGAALGTLSASSWA | Negative |
| Q05202 | NQTISSRAPQKRLAPRLLCV | Negative |
| Q05202 | KRLAPRLLCVMIGAALGTLS | Negative |
| Q05202 | ISSRAPQKRLAPRLLCVMIG | Negative |
| Q05202 | GTLASSWAAAATDSTAENA  | Negative |
| Q05202 | SRAPQKRLAPRLLCVMIGAA | Negative |
| Q05202 | LGTLASSWAAAATDSTAEN  | Negative |
| Q05202 | RAPQKRLAPRLLCVMIGAAL | Negative |
| Q05202 | LSASSWAAAATDSTAENAKK | Negative |
| Q05443 | LALIGGASSTYPDYYEYYDF | Negative |
| Q05443 | DYYEYYDFPQALYGRSSPNC | Negative |
| Q05443 | FPLLLALIGGASSTYPDYYE | Negative |
| Q05443 | EYYDFPQALYGRSSPNCAP  | Negative |
| Q05443 | LIGGASSTYPDYYEYYDFPQ | Negative |



|        |                       |          |
|--------|-----------------------|----------|
| Q05443 | SSTYPDYYEYYDFPQALYGR  | Negative |
| Q05443 | PLLLALIGGASSTYPDYYEY  | Negative |
| Q05443 | LLALIGGASSTYPDYYEYYD  | Negative |
| Q05443 | TYPDYYEYYDFPQALYGRSS  | Negative |
| Q05443 | GGASSTYPDYYEYYDFPQAL  | Negative |
| Q05443 | IGGASSTYPDYYEYYDFPQA  | Negative |
| Q05443 | DFPQALYGRSSPNCAPCNC   | Negative |
| Q05443 | ASSTYPDYYEYYDFPQALYG  | Negative |
| Q05443 | MNLGVFPLLLALIGGASSTY  | Negative |
| Q05443 | YDFPQALYGRSSPNCAPCNC  | Negative |
| Q05443 | ALIGGASSTYPDYYEYYDFP  | Negative |
| Q05443 | YYDFPQALYGRSSPNCAPC   | Negative |
| Q05443 | LLLALIGGASSTYPDYYEYY  | Negative |
| Q05443 | GASSTYPDYYEYYDFPQALY  | Negative |
| Q05443 | LGVFPLLLALIGGASSTYPD  | Negative |
| Q05443 | YEYYDFPQALYGRSSPNCAP  | Negative |
| Q05443 | NLGVFPLLLALIGGASSTYP  | Negative |
| Q05443 | FPQALYGRSSPNCAPCNC    | Negative |
| Q05443 | PQALYGRSSPNCAPCNCPE   | Negative |
| Q05443 | YYEYYDFPQALYGRSSPNCA  | Negative |
| Q05443 | PDYYEYYDFPQALYGRSSPN  | Negative |
| Q05443 | YPDYEYYDFPQALYGRSSP   | Negative |
| Q05443 | STYPDYYEYYDFPQALYGRS  | Negative |
| Q05443 | VFPLLLALIGGASSTYPDYY  | Negative |
| Q05489 | WALAVMPLAGAAGLTMAASP  | Negative |
| Q05489 | AWALAVMPLAGAAGLTMAAS  | Negative |
| Q05489 | VAWALAVMPLAGAAGLTMAA  | Negative |
| Q05489 | VAARAVAWALAVMPLAGAAG  | Negative |
| Q05489 | RSRVAARAVAWALAVMPLAG  | Negative |
| Q05489 | RSMRSRVAARAVAWALAVMP  | Negative |
| Q05489 | SRVAARAVAWALAVMPLAGA  | Negative |
| Q05489 | RAVAWALAVMPLAGAAGLTMA | Negative |
| Q05489 | MPLAGAAGLTMAASPAAVAA  | Negative |
| Q05489 | RVAARAVAWALAVMPLAGAA  | Negative |
| Q05489 | PLAGAAGLTMAASPAAVAAD  | Negative |
| Q05489 | ARAVAWALAVMPLAGAAGLT  | Negative |
| Q05489 | LAGAAGLTMAASPAAVAADT  | Negative |
| Q05489 | LTMAASPAAVAADTYAATRY  | Negative |
| Q05489 | GLTMAASPAAVAADTYAATR  | Negative |
| Q05489 | AGLTMAASPAAVAADTYAAT  | Negative |
| Q05489 | LAVMPLAGAAGLTMAASPAA  | Negative |
| Q05489 | VMPLAGAAGLTMAASPAAVA  | Negative |
| Q05489 | ALAVMPLAGAAGLTMAASPA  | Negative |
| Q05489 | AVMPLAGAAGLTMAASPAAV  | Negative |
| Q05489 | VRSMRSRVAARAVAWALAVM  | Negative |
| Q05489 | SMRSRVAARAVAWALAVMPL  | Negative |

|        |                       |          |
|--------|-----------------------|----------|
| Q05489 | MRSRVAARAVAWALAVMPLA  | Negative |
| Q05489 | AAGLTMAASPAAVAADTYAA  | Negative |
| Q05489 | AARAVAWALAVMPLAGAAGL  | Negative |
| Q05489 | TMAASPAAVAADTYAATRYP  | Negative |
| Q05489 | AGAAGLTMAASPAAVAADTY  | Negative |
| Q05489 | MVRSMRSRVAARAVAWALAV  | Negative |
| Q05489 | AVAWALAVMPLAGAAGLTMA  | Negative |
| Q05538 | AEQCGSQAGGALCASGLCCS  | Negative |
| Q05538 | LSEFTTLFLLFSVLLLSASA  | Negative |
| Q05538 | QAGGALCASGLCCSKFGWCG  | Negative |
| Q05538 | LLLSASAEQCGSQAGGALCA  | Negative |
| Q05538 | SASAEQCGSQAGGALCASGL  | Negative |
| Q05538 | FSVLLLSASAEQCGSQAGGA  | Negative |
| Q05538 | GSQAGGALCASGLCCSKFGW  | Negative |
| Q05538 | SEFTTLFLLFSVLLLSASAE  | Negative |
| Q05538 | LLSASAEQCGSQAGGALCAS  | Negative |
| Q05538 | LLFSVLLLSASAEQCGSQAG  | Negative |
| Q05538 | LFLFSVLLLSASAEQCGSQ   | Negative |
| Q05538 | VLLLSASAEQCGSQAGGALC  | Negative |
| Q05538 | LSASAEQCGSQAGGALCASG  | Negative |
| Q05538 | SAEQCGSQAGGALCASGLCC  | Negative |
| Q05538 | MRLSEFTTLFLLFSVLLLSA  | Negative |
| Q05538 | SQAGGALCASGLCCSKFGWC  | Negative |
| Q05538 | EQCGSQAGGALCASGLCCSK  | Negative |
| Q05538 | EFTTLFLLFSVLLLSASAEQ  | Negative |
| Q05538 | AGGALCASGLCCSKFGWCGN  | Negative |
| Q05538 | ASAEQCGSQAGGALCASGLC  | Negative |
| Q05538 | SVLLLSASAEQCGSQAGGAL  | Negative |
| Q05538 | CGSQAGGALCASGLCCSKFG  | Negative |
| Q05538 | QCGSQAGGALCASGLCCSKF  | Negative |
| Q05538 | FTTLFLLFSVLLLSASAEQC  | Negative |
| Q05538 | RLSEFTTLFLLFSVLLLSAS  | Negative |
| Q05538 | TTLFLLFSVLLLSASAEQCG  | Negative |
| Q05538 | LFSVLLLSASAEQCGSQAGG  | Negative |
| Q05538 | GGALCASGLCCSKFGWCGNT  | Negative |
| Q05538 | FLLFSVLLLSASAEQCGSQA  | Negative |
| Q05811 | STPVLAADAIVAAEPEPVEY  | Negative |
| Q05811 | LLASAAAFAASTPVLAADAI  | Negative |
| Q05811 | ADAIVAAEPEPVEYVRVCDA  | Negative |
| Q05811 | MVLLASAAAFAASTPVLAAD  | Negative |
| Q05811 | VLLASAAAFAASTPVLAADA  | Negative |
| Q05811 | AAAFAASTPVLAADAIVAAE  | Negative |
| Q05811 | ASAAAFAASTPVLAADAIVA  | Negative |
| Q05811 | EPEPVEYVRVCDA YGTGYFY | Negative |
| Q05811 | AASTPVLAADAIVAAEPEPV  | Negative |
| Q05811 | TPVLAADAIVAAEPEPVEYV  | Negative |

|        |                      |          |
|--------|----------------------|----------|
| Q05811 | AADAIVAAEPEPVEYVRVCD | Negative |
| Q05811 | VLAADAIVAAEPEPVEYVRV | Negative |
| Q05811 | DAIVAAEPEPVEYVRVCDAY | Negative |
| Q05811 | FAASTPVLAADAIVAAEPEP | Negative |
| Q05811 | NIRMVLLASAAAFAASTPVL | Negative |
| Q05811 | AFAASTPVLAADAIVAAEPE | Negative |
| Q05811 | VAAEPEPVEYVRVCDAYGTG | Negative |
| Q05811 | AIVAAEPEPVEYVRVCDAYG | Negative |
| Q05811 | LAADAIVAAEPEPVEYVRVC | Negative |
| Q05811 | PVLAADAIVAAEPEPVEYVR | Negative |
| Q05811 | AAFAASTPVLAADAIVAAEP | Negative |
| Q05811 | IRMVLLASAAAFAASTPVLA | Negative |
| Q05811 | MNIRMVLLASAAAFAASTPV | Negative |
| Q05811 | ASTPVLAADAIVAAEPEPVE | Negative |
| Q05811 | SAAAFAASTPVLAADAIVAA | Negative |
| Q05811 | AEPEPVEYVRVCDAYGTGYF | Negative |
| Q05811 | IVAAEPEPVEYVRVCDAYGT | Negative |
| Q05811 | AAEPEPVEYVRVCDAYGTGY | Negative |
| Q05811 | RMVLLASAAAFAASTPVLA  | Negative |
| Q05819 | ILYLIVLQQLFLCSAYAQQK | Negative |
| Q05819 | AYAQQKKSGNIPYRVNVQAD | Negative |
| Q05819 | LFLCSAYAQQKKSGNIPYRV | Negative |
| Q05819 | FLCSAYAQQKKSGNIPYRVN | Negative |
| Q05819 | PYRVNVQADSAKQKAIIDNK | Negative |
| Q05819 | IVLQQLFLCSAYAQQKKSGN | Negative |
| Q05819 | SAYAQQKKSGNIPYRVNVQA | Negative |
| Q05819 | AQQKKSGNIPYRVNVQADSA | Negative |
| Q05819 | MKKQILYLIVLQQLFLCSAY | Negative |
| Q05819 | LIVLQQLFLCSAYAQQKKSG | Negative |
| Q05819 | QQKKSGNIPYRVNVQADSAK | Negative |
| Q05819 | KKSGNIPYRVNVQADSAKQK | Negative |
| Q05819 | LQQLFLCSAYAQQKKSGNIP | Negative |
| Q05819 | GNIPYRVNVQADSAKQKAI  | Negative |
| Q05819 | CSAYAQQKKSGNIPYRVNVQ | Negative |
| Q05819 | YAQQKKSGNIPYRVNVQADS | Negative |
| Q05819 | NIPYRVNVQADSAKQKAIID | Negative |
| Q05819 | SGNIPYRVNVQADSAKQKAI | Negative |
| Q05819 | KKQILYLIVLQQLFLCSAYA | Negative |
| Q05819 | KQILYLIVLQQLFLCSAYAQ | Negative |
| Q05819 | LYLIVLQQLFLCSAYAQQKK | Negative |
| Q05819 | QILYLIVLQQLFLCSAYAQQ | Negative |
| Q05819 | LCSAYAQQKKSGNIPYRVNV | Negative |
| Q05819 | QLFLCSAYAQQKKSGNIPYR | Negative |
| Q05819 | KSGNIPYRVNVQADSAKQKA | Negative |
| Q05819 | QKKSGNIPYRVNVQADSAKQ | Negative |
| Q05819 | IPYRVNVQADSAKQKAIIDN | Negative |

|        |                      |          |
|--------|----------------------|----------|
| Q05819 | VLQQLFLCSAYAQQKKSGNI | Negative |
| Q05819 | QQLFLCSAYAQQKKSGNIPY | Negative |
| Q05884 | PATRRTARVRRVAAVTVTAL | Negative |
| Q05884 | PPLAARADTPPAPPSDAKLA | Negative |
| Q05884 | LAARADTPPAPPSDAKLAKT | Negative |
| Q05884 | MPATRRTARVRRVAAVTVTA | Negative |
| Q05884 | LAAALLPPLAARADTPPAPP | Negative |
| Q05884 | PLAARADTPPAPPSDAKLAK | Negative |
| Q05884 | ATRRTARVRRVAAVTVTALA | Negative |
| Q05884 | VTALAAALLPPLAARADTPP | Negative |
| Q05884 | RRTARVRRVAAVTVTALAAA | Negative |
| Q05884 | AARADTPPAPPSDAKLAKTA | Negative |
| Q05884 | VRRVAAVTVTALAAALLPPL | Negative |
| Q05884 | ARVRRVAAVTVTALAAALLP | Negative |
| Q05884 | TVTALAAALLPPLAARADTP | Negative |
| Q05884 | TRRTARVRRVAAVTVTALAA | Negative |
| Q05884 | AAALLPPLAARADTPPAPPS | Negative |
| Q05884 | AALLPPLAARADTPPAPPSD | Negative |
| Q05884 | VAAVTVTALAAALLPPLAAR | Negative |
| Q05884 | RVRRVAAVTVTALAAALLPP | Negative |
| Q05884 | ALAAALLPPLAARADTPPAP | Negative |
| Q05884 | RVAAVTVTALAAALLPPLAA | Negative |
| Q05884 | TARVRRVAAVTVTALAAALL | Negative |
| Q05884 | LPPLAARADTPPAPPSDAKL | Negative |
| Q05884 | AVTVTALAAALLPPLAARAD | Negative |
| Q05884 | AAVTVTALAAALLPPLAARA | Negative |
| Q05884 | LLPPLAARADTPPAPPSDAK | Negative |
| Q05884 | RTARVRRVAAVTVTALAAAL | Negative |
| Q05884 | RRVAAVTVTALAAALLPPLA | Negative |
| Q05884 | VTVTALAAALLPPLAARADT | Negative |
| Q05884 | ALLPPLAARADTPPAPPSDA | Negative |
| Q05894 | VSGHGYMTFPIARQRRCSV  | Negative |
| Q05894 | IYINILYVCVSGHGYMTFPI | Negative |
| Q05894 | NKFYYICIYINILYVCVSGH | Negative |
| Q05894 | YVCVSGHGYMTFPIARQRR  | Negative |
| Q05894 | TFPIARQRRCSVGGQWWPP  | Negative |
| Q05894 | KFYYICIYINILYVCVSGHG | Negative |
| Q05894 | FPIARQRRCSVGGQWWPPN  | Negative |
| Q05894 | HGYMTFPIARQRRCSVGGQ  | Negative |
| Q05894 | ILYVCVSGHGYMTFPIARQR | Negative |
| Q05894 | VCVSGHGYMTFPIARQRRCS | Negative |
| Q05894 | MTFPIARQRRCSVGGQWWP  | Negative |
| Q05894 | YMTFPIARQRRCSVGGQWW  | Negative |
| Q05894 | ARQRRCSVGGQWWPPNGDG  | Negative |
| Q05894 | GHGYMTFPIARQRRCSVGG  | Negative |
| Q05894 | PIARQRRCSVGGQWWPPNG  | Negative |

|        |                       |          |
|--------|-----------------------|----------|
| Q05894 | IARQRRCSVRGGQWWPPNGD  | Negative |
| Q05894 | GYMTFPIARQRRCSVRGGQW  | Negative |
| Q05894 | FYYICIYINILYVCVSGHGY  | Negative |
| Q05894 | CVSGHGYMTFPIARQRRCSV  | Negative |
| Q05894 | LYVCVSGHGYMTFPIARQRR  | Negative |
| Q05894 | INILYVCVSGHGYMTFPIAR  | Negative |
| Q05894 | YYICIYINILYVCVSGHGYM  | Negative |
| Q05894 | CIYINILYVCVSGHGYMTFP  | Negative |
| Q05894 | MNKFYYICIYINILYVCVSG  | Negative |
| Q05894 | SGHGYMTFPIARQRRCSV RG | Negative |
| Q05894 | ICIYINILYVCVSGHGYMTF  | Negative |
| Q05894 | YINILYVCVSGHGYMTFPIA  | Negative |
| Q05894 | NILYVCVSGHGYMTFPIARQ  | Negative |
| Q05894 | RQRRCSVRGGQWWPPNGDGI  | Negative |
| Q05895 | GSQDLQVIDLLTVGESRQMV  | Negative |
| Q05895 | LLCSYTCGSQDLQVIDLLT   | Negative |
| Q05895 | VIDLLTVGESRQMVAVAEKI  | Negative |
| Q05895 | YTCGSQDLQVIDLLTVGESR  | Negative |
| Q05895 | QVIDLLTVGESRQMVAVAEK  | Negative |
| Q05895 | SQDLQVIDLLTVGESRQMVA  | Negative |
| Q05895 | LLTVGESRQMVAVAEAKIRTA | Negative |
| Q05895 | LWGV LALLLLCSYTCGSQDL | Negative |
| Q05895 | GVLALLLLCSYTCGSQDLQV  | Negative |
| Q05895 | ELWGV LALLLLCSYTCGSQD | Negative |
| Q05895 | EKPELWGV LALLLLCSYTCG | Negative |
| Q05895 | CSYTCGSQDLQVIDLLTVGE  | Negative |
| Q05895 | KPELWGV LALLLLCSYTCGS | Negative |
| Q05895 | QDLQVIDLLTVGESRQMVA V | Negative |
| Q05895 | LQVIDLLTVGESRQMVAVAE  | Negative |
| Q05895 | ALLLLCSYTCGSQDLQVIDL  | Negative |
| Q05895 | LLCSYTCGSQDLQVIDLLTV  | Negative |
| Q05895 | CGSQDLQVIDLLTVGESRQM  | Negative |
| Q05895 | PELWGV LALLLLCSYTCGSQ | Negative |
| Q05895 | SYTCGSQDLQVIDLLTVGES  | Negative |
| Q05895 | MEKPELWGV LALLLLCSYTC | Negative |
| Q05895 | IDLLTVGESRQMVAVAEKIR  | Negative |
| Q05895 | LLLLCSYTCGSQDLQVIDLL  | Negative |
| Q05895 | LALLLLCSYTCGSQDLQVID  | Negative |
| Q05895 | TCGSQDLQVIDLLTVGESRQ  | Negative |
| Q05895 | LCSYTCGSQDLQVIDLLTVG  | Negative |
| Q05895 | DLQVIDLLTVGESRQMVAVA  | Negative |
| Q05895 | DLLTVGESRQMVAVAEAKIRT | Negative |
| Q05895 | VLALLLLCSYTCGSQDLQVI  | Negative |
| Q05918 | ATAVAADAPQAVATKAAAPN  | Negative |
| Q05918 | THHANLALALMLGLSSSATA  | Negative |
| Q05918 | GLSSSATAVAADAPQAVATK  | Negative |

|        |                      |          |
|--------|----------------------|----------|
| Q05918 | ANLALALMLGLSSSATAVAA | Negative |
| Q05918 | QAVATKAAAPNVKPVAADAH | Negative |
| Q05918 | TAVAADAPQAVATKAAAPNV | Negative |
| Q05918 | AADAPQAVATKAAAPNVKPV | Negative |
| Q05918 | SSSATAVAADAPQAVATKAA | Negative |
| Q05918 | APQAVATKAAAPNVKPVAAD | Negative |
| Q05918 | AVATKAAAPNVKPVAADAHG | Negative |
| Q05918 | MLGLSSSATAVAADAPQAVA | Negative |
| Q05918 | ADAPQAVATKAAAPNVKPVA | Negative |
| Q05918 | ALMLGLSSSATAVAADAPQA | Negative |
| Q05918 | LSSSATAVAADAPQAVATKA | Negative |
| Q05918 | HANLALALMLGLSSSATAVA | Negative |
| Q05918 | HHANLALALMLGLSSSATAV | Negative |
| Q05918 | ALALMLGLSSSATAVAADAP | Negative |
| Q05918 | KTHHANLALALMLGLSSSAT | Negative |
| Q05918 | VAADAPQAVATKAAAPNVKP | Negative |
| Q05918 | MKTHHANLALALMLGLSSSA | Negative |
| Q05918 | LGLSSSATAVAADAPQAVAT | Negative |
| Q05918 | SATAVAADAPQAVATKAAAP | Negative |
| Q05918 | AVAADAPQAVATKAAAPNVK | Negative |
| Q05918 | SSATAVAADAPQAVATKAAA | Negative |
| Q05918 | PQAVATKAAAPNVKPVAADA | Negative |
| Q05918 | LMLGLSSSATAVAADAPQAV | Negative |
| Q05918 | NLALALMLGLSSSATAVAAD | Negative |
| Q05918 | LALALMLGLSSSATAVAADA | Negative |
| Q05918 | DAPQAVATKAAAPNVKPVAA | Negative |
| Q05JY7 | LSAMIASSLLIGCVIPTVKA | Negative |
| Q05JY7 | IKILSAMIASSLLIGCVIPT | Negative |
| Q05JY7 | AMIASSLLIGCVIPTVKASQ | Negative |
| Q05JY7 | IASSLLIGCVIPTVKASQSA | Negative |
| Q05JY7 | KILSAMIASSLLIGCVIPTV | Negative |
| Q05JY7 | VIPTVKASQSAIKSIETNRT | Negative |
| Q05JY7 | MIASSLLIGCVIPTVKASQS | Negative |
| Q05JY7 | LLIGCVIPTVKASQSAIKSI | Negative |
| Q05JY7 | SAIKSIETNRTITKVRTGML | Negative |
| Q05JY7 | ASQSAIKSIETNRTITKVRT | Negative |
| Q05JY7 | SQSAIKSIETNRTITKVRTG | Negative |
| Q05JY7 | MKIKILSAMIASSLLIGCVI | Negative |
| Q05JY7 | KIKILSAMIASSLLIGCVIP | Negative |
| Q05JY7 | ILSAMIASSLLIGCVIPTVK | Negative |
| Q05JY7 | QSAIKSIETNRTITKVRTGM | Negative |
| Q05JY7 | IKSIETNRTITKVRTGMLSG | Negative |
| Q05JY7 | IPTVKASQSAIKSIETNRTI | Negative |
| Q05JY7 | SSLIGCVIPTVKASQSAIK  | Negative |
| Q05JY7 | SLLIGCVIPTVKASQSAIKS | Negative |
| Q05JY7 | PTVKASQSAIKSIETNRTIT | Negative |

|        |                      |          |
|--------|----------------------|----------|
| Q05JY7 | VKASQSAIKSIETNRTITKV | Negative |
| Q05JY7 | SAMIASLLIGCVIPTVKAS  | Negative |
| Q05JY7 | GCVIPTVKASQSAIKSIETN | Negative |
| Q05JY7 | TVKASQSAIKSIETNRTITK | Negative |
| Q05JY7 | AIKSIETNRTITKVRTGMLS | Negative |
| Q05JY7 | IGCVIPTVKASQSAIKSIET | Negative |
| Q05JY7 | KASQSAIKSIETNRTITKVR | Negative |
| Q05JY7 | CVIPTVKASQSAIKSIETNR | Negative |
| Q05JY7 | LIGCVIPTVKASQSAIKSIE | Negative |
| Q06006 | LQRVKVDLVAPPLVHPHEQV | Negative |
| Q06006 | VLGACVLLGSCASSLALAGG | Negative |
| Q06006 | CVLLGSCASSLALAGGAEGL | Negative |
| Q06006 | SLALAGGAEGLQRVKVDLVA | Negative |
| Q06006 | RSVLGACVLLGSCASSLALA | Negative |
| Q06006 | SVFRSVLGACVLLGSCASSL | Negative |
| Q06006 | LAGGAEGLQRVKVDLVAPPL | Negative |
| Q06006 | GLQRVKVDLVAPPLVHPHEQ | Negative |
| Q06006 | AEGLQRVKVDLVAPPLVHPH | Negative |
| Q06006 | ALAGGAEGLQRVKVDLVAPP | Negative |
| Q06006 | LLGSCASSLALAGGAEGLQR | Negative |
| Q06006 | LGACVLLGSCASSLALAGGA | Negative |
| Q06006 | SVLGACVLLGSCASSLALAG | Negative |
| Q06006 | LGSCASSLALAGGAEGLQRV | Negative |
| Q06006 | AGGAEGLQRVKVDLVAPPLV | Negative |
| Q06006 | MSVFRSVLGACVLLGSCASS | Negative |
| Q06006 | GAEGLQRVKVDLVAPPLVHP | Negative |
| Q06006 | VFRSVLGACVLLGSCASSLA | Negative |
| Q06006 | LALAGGAEGLQRVKVDLVAP | Negative |
| Q06006 | FRSVLGACVLLGSCASSLAL | Negative |
| Q06006 | ASSLALAGGAEGLQRVKVDL | Negative |
| Q06006 | GACVLLGSCASSLALAGGAE | Negative |
| Q06006 | GGAEGLQRVKVDLVAPPLVH | Negative |
| Q06006 | SCASSLALAGGAEGLQRVKV | Negative |
| Q06006 | VLLGSCASSLALAGGAEGLQ | Negative |
| Q06006 | CASSLALAGGAEGLQRVKVD | Negative |
| Q06006 | GSCASSLALAGGAEGLQRVK | Negative |
| Q06006 | EGLQRVKVDLVAPPLVHPHE | Negative |
| Q06006 | SSLALAGGAEGLQRVKVDLV | Negative |
| Q06153 | SAMAAPYSGNSNSDSYDPCT | Negative |
| Q06153 | QFSIATIALFLSSAMAAPYS | Negative |
| Q06153 | NSDSYDPCTGLLQKSPQCCN | Negative |
| Q06153 | SSAMAAPYSGNSNSDSYDPC | Negative |
| Q06153 | AAPYSGNSNSDSYDPCTGLL | Negative |
| Q06153 | SNSDSYDPCTGLLQKSPQCC | Negative |
| Q06153 | AMAAPYSGNSNSDSYDPCTG | Negative |
| Q06153 | IALFLSSAMAAPYSGNSNSD | Negative |

|        |                      |          |
|--------|----------------------|----------|
| Q06153 | MQFSIATIALFLSSAMAAPY | Negative |
| Q06153 | LSSAMAAPYSGNSNSDSYDP | Negative |
| Q06153 | YDPCTGLLQKSPQCCNTDIL | Negative |
| Q06153 | ALFLSSAMAAPYSGNSNSDS | Negative |
| Q06153 | PYSGNSNSDSYDPCTGLLQK | Negative |
| Q06153 | SYDPCTGLLQKSPQCCNTDI | Negative |
| Q06153 | MAAPYSGNSNSDSYDPCTGL | Negative |
| Q06153 | ATIALFLSSAMAAPYSGNSN | Negative |
| Q06153 | IATIALFLSSAMAAPYSGNS | Negative |
| Q06153 | DPCTGLLQKSPQCCNTDILG | Negative |
| Q06153 | APYSGNSNSDSYDPCTGLLQ | Negative |
| Q06153 | NSNSDSYDPCTGLLQKSPQC | Negative |
| Q06153 | TIALFLSSAMAAPYSGNSNS | Negative |
| Q06153 | LFLSSAMAAPYSGNSNSDSY | Negative |
| Q06153 | YSGNSNSDSYDPCTGLLQKS | Negative |
| Q06153 | SGNSNSDSYDPCTGLLQKSP | Negative |
| Q06153 | SIATIALFLSSAMAAPYSGN | Negative |
| Q06153 | DSYDPCTGLLQKSPQCCNTD | Negative |
| Q06153 | GNSNSDSYDPCTGLLQKSPQ | Negative |
| Q06153 | FSIATIALFLSSAMAAPYSG | Negative |
| Q06153 | SDSYDPCTGLLQKSPQCCNT | Negative |
| Q06529 | NAGAEPTAEMLTNNCAGCHG | Negative |
| Q06529 | GLASNAGAEPTAEMLTNNCA | Negative |
| Q06529 | SVLALGLASNAGAEPTAEML | Negative |
| Q06529 | ASVLALGLASNAGAEPTAEM | Negative |
| Q06529 | ASNAGAEPTAEMLTNNCAGC | Negative |
| Q06529 | TQSTPRLMLAASVLALGLAS | Negative |
| Q06529 | MTQSTPRLMLAASVLALGLA | Negative |
| Q06529 | LASNAGAEPTAEMLTNNCAG | Negative |
| Q06529 | STPRLMLAASVLALGLASNA | Negative |
| Q06529 | ALGLASNAGAEPTAEMLTNN | Negative |
| Q06529 | PTAEMLTNNCAGCHGTHGNS | Negative |
| Q06529 | AEPTAEMLTNNCAGCHGTHG | Negative |
| Q06529 | VLALGLASNAGAEPTAEMLT | Negative |
| Q06529 | QSTPRLMLAASVLALGLASN | Negative |
| Q06529 | AGAEPTAEMLTNNCAGCHGT | Negative |
| Q06529 | LAASVLALGLASNAGAEPTA | Negative |
| Q06529 | EMLTNNCAGCHGTHGNSVGP | Negative |
| Q06529 | TAEMLTNNCAGCHGTHGNSV | Negative |
| Q06529 | RLMLAASVLALGLASNAGAE | Negative |
| Q06529 | AEMLTNNCAGCHGTHGNSVG | Negative |
| Q06529 | LALGLASNAGAEPTAEMLTN | Negative |
| Q06529 | LGLASNAGAEPTAEMLTNNC | Negative |
| Q06529 | TPRLMLAASVLALGLASNAG | Negative |
| Q06529 | MLAASVLALGLASNAGAEPT | Negative |
| Q06529 | GAEPTAEMLTNNCAGCHGTH | Negative |



|        |                      |          |
|--------|----------------------|----------|
| Q06529 | PRLMLAASVLALGLASNAGA | Negative |
| Q06529 | EPTAEMLTNNCAGCHGTHGN | Negative |
| Q06529 | SNAGAEPTAEMLTNNCAGCH | Negative |
| Q06529 | LMLAASVLALGLASNAGAEP | Negative |
| Q06575 | NVLNDQVSCSGPPGPVGYPG | Negative |
| Q06575 | VLMVNVLNDQVSCSGPPGPV | Negative |
| Q06575 | DVWRLAIFVLMVNVLNDQVS | Negative |
| Q06575 | CSGPPGPVGYPGVPGVPGPR | Negative |
| Q06575 | LMVNVLNDQVSCSGPPGPVG | Negative |
| Q06575 | LAIFVLMVNVLNDQVSCSGP | Negative |
| Q06575 | GPVGYPGVPGVPGPRGPPGQ | Negative |
| Q06575 | DQVSCSGPPGPVGYPGVPGV | Negative |
| Q06575 | VLNDQVSCSGPPGPVGYPGV | Negative |
| Q06575 | FVLMVNVLNDQVSCSGPPGP | Negative |
| Q06575 | MTDVWRLAIFVLMVNVLNDQ | Negative |
| Q06575 | MVNVLNDQVSCSGPPGPVGY | Negative |
| Q06575 | SGPPGPVGYPGVPGVPGPRG | Negative |
| Q06575 | VSCSGPPGPVGYPGVPGVPG | Negative |
| Q06575 | VWRLAIFVLMVNVLNDQVSC | Negative |
| Q06575 | PPGPVGYPGVPGVPGPRGPP | Negative |
| Q06575 | SCSGPPGPVGYPGVPGVPGP | Negative |
| Q06575 | QVSCSGPPGPVGYPGVPGVP | Negative |
| Q06575 | GPPGPVGYPGVPGVPGPRGP | Negative |
| Q06575 | RLAIFVLMVNVLNDQVSCSG | Negative |
| Q06575 | AIFVLMVNVLNDQVSCSGPP | Negative |
| Q06575 | WRLAIFVLMVNVLNDQVSCS | Negative |
| Q06575 | NDQVSCSGPPGPVGYPGVPG | Negative |
| Q06575 | VNVLNDQVSCSGPPGPVGYP | Negative |
| Q06575 | LNDQVSCSGPPGPVGYPGVP | Negative |
| Q06575 | TDVWRLAIFVLMVNVLNDQV | Negative |
| Q06575 | PGPVGYPGVPGVPGPRGPPG | Negative |
| Q06575 | PVGYPGVPGVPGPRGPPGQP | Negative |
| Q06575 | VGYPGVPGVPGPRGPPGQPG | Negative |
| Q06576 | ILVLSITSALADSNNQGNSE | Negative |
| Q06576 | RGGALSMGAAGFWILVLSIT | Negative |
| Q06576 | GAAGFWILVLSITSALADSN | Negative |
| Q06576 | QRGGALSMGAAGFWILVLSI | Negative |
| Q06576 | ALADSNNQGNSEPCGPPGPP | Negative |
| Q06576 | ADSNNQGNSEPCGPPGPPGP | Negative |
| Q06576 | LSMGAAGFWILVLSITSALA | Negative |
| Q06576 | GGALSMGAAGFWILVLSITS | Negative |
| Q06576 | GALSMGAAGFWILVLSITSA | Negative |
| Q06576 | TSALADSNNQGNSEPCGPPG | Negative |
| Q06576 | SMGAAGFWILVLSITSALAD | Negative |
| Q06576 | FWILVLSITSALADSNNQGN | Negative |
| Q06576 | AAGFWILVLSITSALADSNN | Negative |

|        |                      |          |
|--------|----------------------|----------|
| Q06576 | ALSMGAAGFWILVLSITSAL | Negative |
| Q06576 | PAQRGGALSMGAAGFWILVL | Negative |
| Q06576 | LADSNNQGNSEPCGPPGPPG | Negative |
| Q06576 | DSNNQGNSEPCGPPGPPGPP | Negative |
| Q06576 | GFWILVLSITSALADSNNQG | Negative |
| Q06576 | SNNQGNSEPCGPPGPPGPPG | Negative |
| Q06576 | VLSITSALADSNNQGNSEPC | Negative |
| Q06576 | LVLSITSALADSNNQGNSEP | Negative |
| Q06576 | AQRGGALSMGAAGFWILVLS | Negative |
| Q06576 | WILVLSITSALADSNNQGNS | Negative |
| Q06576 | MPAQRGGALSMGAAGFWILV | Negative |
| Q06576 | ITSALADSNNQGNSEPCGPP | Negative |
| Q06576 | LSITSALADSNNQGNSEPCG | Negative |
| Q06576 | SITSALADSNNQGNSEPCGP | Negative |
| Q06576 | SALADSNNQGNSEPCGPPGP | Negative |
| Q06576 | MGAAGFWILVLSITSALADS | Negative |
| Q06577 | VVCSETQGNPESCNPVGPQG | Negative |
| Q06577 | GGAGIWILALSVLMHVVCSE | Negative |
| Q06577 | AGIWILALSVLMHVVCSETQ | Negative |
| Q06577 | ASFMGGAGIWILALSVLMHV | Negative |
| Q06577 | ILALSVLMHVVCSETQGNPE | Negative |
| Q06577 | LMHVVCSETQGNPESCNPVG | Negative |
| Q06577 | GIWILALSVLMHVVCSETQG | Negative |
| Q06577 | YEAGKRASFMGGAGIWILAL | Negative |
| Q06577 | GKRASFMGGAGIWILALSVL | Negative |
| Q06577 | VCSETQGNPESCNPVGPQGP | Negative |
| Q06577 | KRASFMGGAGIWILALSVLM | Negative |
| Q06577 | MHVVCSETQGNPESCNPVGP | Negative |
| Q06577 | LSVLMHVVCSETQGNPESCN | Negative |
| Q06577 | HVVCSETQGNPESCNPVGPQ | Negative |
| Q06577 | ALSVLMHVVCSETQGNPESC | Negative |
| Q06577 | SETQGNPESCNPVGPQGP   | Negative |
| Q06577 | MYEAGKRASFMGGAGIWILA | Negative |
| Q06577 | RASFMGGAGIWILALSVLMH | Negative |
| Q06577 | AGKRASFMGGAGIWILALSV | Negative |
| Q06577 | WILALSVLMHVVCSETQGNP | Negative |
| Q06577 | EAGKRASFMGGAGIWILALS | Negative |
| Q06577 | CSETQGNPESCNPVGPQGP  | Negative |
| Q06577 | SFMGGAGIWILALSVLMHV  | Negative |
| Q06577 | GAGIWILALSVLMHVVCSET | Negative |
| Q06577 | SVLMHVVCSETQGNPESCNP | Negative |
| Q06577 | FMGGAGIWILALSVLMHVVC | Negative |
| Q06577 | MGGAGIWILALSVLMHVCS  | Negative |
| Q06577 | LALSVLMHVVCSETQGNPES | Negative |
| Q06577 | VLMHVVCSETQGNPESCNP  | Negative |
| Q06749 | ALAAALLASQVSQAADLVPP | Negative |

|        |                       |          |
|--------|-----------------------|----------|
| Q06749 | KTSHLIRIALPGALAAALLA  | Negative |
| Q06749 | ALPGALAAALLASQVSQAAD  | Negative |
| Q06749 | IALPGALAAALLASQVSQAA  | Negative |
| Q06749 | IRIALPGALAAALLASQVSQ  | Negative |
| Q06749 | AALLASQVSQAADLVPPPGY  | Negative |
| Q06749 | SQVSQAADLVPPPGYYAAVG  | Negative |
| Q06749 | LPGALAAALLASQVSQAADL  | Negative |
| Q06749 | LAAALLASQVSQAADLVPPP  | Negative |
| Q06749 | ALLASQVSQAADLVPPPGYY  | Negative |
| Q06749 | SHLIRIALPGALAAALLASQ  | Negative |
| Q06749 | ADLVPPPGYYAAVGERKGS   | Negative |
| Q06749 | DLVPPPGYYAAVGERKGSAG  | Negative |
| Q06749 | ASQVSQAADLVPPPGYYAAV  | Negative |
| Q06749 | QVSQAADLVPPPGYYAAVGE  | Negative |
| Q06749 | SQAADLVPPPGYYAAVGERK  | Negative |
| Q06749 | HLIRIALPGALAAALLASQV  | Negative |
| Q06749 | AADLVPPPGYYAAVGERKGS  | Negative |
| Q06749 | LLASQVSQAADLVPPPGYYA  | Negative |
| Q06749 | RIALPGALAAALLASQVSQA  | Negative |
| Q06749 | PGALAAALLASQVSQAADLV  | Negative |
| Q06749 | TSHLIRIALPGALAAALLAS  | Negative |
| Q06749 | LASQVSQAADLVPPPGYYAA  | Negative |
| Q06749 | QAADLVPPPGYYAAVGERKG  | Negative |
| Q06749 | LVPPPGYYAAVGERKGSAGS  | Negative |
| Q06749 | LIRIALPGALAAALLASQVS  | Negative |
| Q06749 | AAALLASQVSQAADLVPPPG  | Negative |
| Q06749 | MKTSHLIRIALPGALAAALL  | Negative |
| Q06749 | VSQAADLVPPPGYYAAVGER  | Negative |
| Q06851 | MRKVISMILLVVAMLTTFIAA | Negative |
| Q06851 | RKVISMILLVVAMLTTFIAAM | Negative |
| Q06851 | IPQTVSAATMTVEIGKVTA   | Negative |
| Q06851 | TIFAAMIPQTVSAATMTVEI  | Negative |
| Q06851 | VVAMLTTFIAAMIPQTVSAA  | Negative |
| Q06851 | VSAATMTVEIGKVTAAVGSK  | Negative |
| Q06851 | MLTTIFAAMIPQTVSAATMT  | Negative |
| Q06851 | MIPQTVSAATMTVEIGKVTA  | Negative |
| Q06851 | AMLTTFIAAMIPQTVSAATM  | Negative |
| Q06851 | KVISMILLVVAMLTTFIAAMI | Negative |
| Q06851 | SMLLVVAMLTTFIAAMIPQT  | Negative |
| Q06851 | LVVAMLTTFIAAMIPQTVSA  | Negative |
| Q06851 | TVSAATMTVEIGKVTAAVGS  | Negative |
| Q06851 | MLLVVAMLTTFIAAMIPQTV  | Negative |
| Q06851 | AMIPQTVSAATMTVEIGKVT  | Negative |
| Q06851 | IFAAMIPQTVSAATMTVEIG  | Negative |
| Q06851 | VISMILLVVAMLTTFIAAMIP | Negative |
| Q06851 | TMTVEIGKVTAAVGSKVEIP  | Negative |

|        |                                         |          |
|--------|-----------------------------------------|----------|
| Q06851 | ISM L L V V A M L T T I F A A M I P Q   | Negative |
| Q06851 | F A A M I P Q T V S A A T M T V E I G K | Negative |
| Q06851 | S A A T M T V E I G K V T A A V G S K V | Negative |
| Q06851 | A A T M T V E I G K V T A A V G S K V E | Negative |
| Q06851 | L L V V A M L T T I F A A M I P Q T V S | Negative |
| Q06851 | Q T V S A A T M T V E I G K V T A A V G | Negative |
| Q06851 | P Q T V S A A T M T V E I G K V T A A V | Negative |
| Q06851 | T T I F A A M I P Q T V S A A T M T V E | Negative |
| Q06851 | V A M L T T I F A A M I P Q T V S A A T | Negative |
| Q06851 | A T M T V E I G K V T A A V G S K V E I | Negative |
| Q06851 | A A M I P Q T V S A A T M T V E I G K V | Negative |
| Q06987 | A E N V Q A E Q A Q E K Q L D T I Q V K | Negative |
| Q06987 | Q Q H L F R L N I L C L S L M T A L P V | Negative |
| Q06987 | A E Q A Q E K Q L D T I Q V K A K K Q K | Negative |
| Q06987 | F R L N I L C L S L M T A L P V Y A E N | Negative |
| Q06987 | I L C L S L M T A L P V Y A E N V Q A E | Negative |
| Q06987 | V Q A E Q A Q E K Q L D T I Q V K A K K | Negative |
| Q06987 | H L F R L N I L C L S L M T A L P V Y A | Negative |
| Q06987 | L P V Y A E N V Q A E Q A Q E K Q L D T | Negative |
| Q06987 | V Y A E N V Q A E Q A Q E K Q L D T I Q | Negative |
| Q06987 | Q Q Q H L F R L N I L C L S L M T A L P | Negative |
| Q06987 | Q A E Q A Q E K Q L D T I Q V K A K K Q | Negative |
| Q06987 | M T A L P V Y A E N V Q A E Q A Q E K Q | Negative |
| Q06987 | Q H L F R L N I L C L S L M T A L P V Y | Negative |
| Q06987 | E N V Q A E Q A Q E K Q L D T I Q V K A | Negative |
| Q06987 | A L P V Y A E N V Q A E Q A Q E K Q L D | Negative |
| Q06987 | Y A E N V Q A E Q A Q E K Q L D T I Q V | Negative |
| Q06987 | N V Q A E Q A Q E K Q L D T I Q V K A K | Negative |
| Q06987 | M Q Q Q H L F R L N I L C L S L M T A L | Negative |
| Q06987 | S L M T A L P V Y A E N V Q A E Q A Q E | Negative |
| Q06987 | T A L P V Y A E N V Q A E Q A Q E K Q L | Negative |
| Q06987 | L C L S L M T A L P V Y A E N V Q A E Q | Negative |
| Q06987 | E Q A Q E K Q L D T I Q V K A K K Q K T | Negative |
| Q06987 | L F R L N I L C L S L M T A L P V Y A E | Negative |
| Q06987 | L S L M T A L P V Y A E N V Q A E Q A Q | Negative |
| Q06987 | C L S L M T A L P V Y A E N V Q A E Q A | Negative |
| Q06987 | R L N I L C L S L M T A L P V Y A E N V | Negative |
| Q06987 | L M T A L P V Y A E N V Q A E Q A Q E K | Negative |
| Q06987 | L N I L C L S L M T A L P V Y A E N V Q | Negative |
| Q06987 | P V Y A E N V Q A E Q A Q E K Q L D T I | Negative |
| Q06988 | Q A A M V L P V F L L S A C L G G G G S | Negative |
| Q06988 | G S F D L D S V E T V Q D M H S K P K Y | Negative |
| Q06988 | L D S V E T V Q D M H S K P K Y E D E K | Negative |
| Q06988 | P L V N Q A A M V L P V F L L S A C L G | Negative |
| Q06988 | L S A C L G G G G S F D L D S V E T V Q | Negative |
| Q06988 | S F D L D S V E T V Q D M H S K P K Y E | Negative |

|        |                       |          |
|--------|-----------------------|----------|
| Q06988 | CLGGGGSFDLDSVETVQDMH  | Negative |
| Q06988 | NPLVNQAAMVLPVFLLSACL  | Negative |
| Q06988 | FDLDSVETVQDMHSPKYED   | Negative |
| Q06988 | ACLGGGGSFDLDSVETVQDM  | Negative |
| Q06988 | NNPLVNQAAMVLPVFLLSAC  | Negative |
| Q06988 | LVNQAAMVLPVFLLSACLGG  | Negative |
| Q06988 | GGSFDLDSVETVQDMHSPK   | Negative |
| Q06988 | LPVFLLSACLGGGGSFDLDS  | Negative |
| Q06988 | LLSACLGGGGSFDLDSVETV  | Negative |
| Q06988 | GGGGSFDLDSVETVQDMHSPK | Negative |
| Q06988 | MVLPVFLLSACLGGGGSFDL  | Negative |
| Q06988 | DLDSVETVQDMHSPKYEDE   | Negative |
| Q06988 | LGGGGSFDLDSVETVQDMHS  | Negative |
| Q06988 | VLPVFLLSACLGGGGSFDLD  | Negative |
| Q06988 | MNNPLVNQAAMVLPVFLLSA  | Negative |
| Q06988 | AAMVLPVFLLSACLGGGGSF  | Negative |
| Q06988 | NQAAMVLPVFLLSACLGGGG  | Negative |
| Q06988 | VFLLSACLGGGGSFDLDSVE  | Negative |
| Q06988 | FLLSACLGGGGSFDLDSVET  | Negative |
| Q06988 | AMVLPVFLLSACLGGGGSFD  | Negative |
| Q06988 | PVFLLSACLGGGGSFDLDSV  | Negative |
| Q06988 | SACLGGGGSFDLDSVETVQD  | Negative |
| Q06988 | GGGSFDLDSVETVQDMHSPK  | Negative |
| Q07081 | KDHCVCVLLPDSSFPKRV    | Negative |
| Q07081 | VLIHAAAAFVAQNATGILAG  | Negative |
| Q07081 | LIHAAAAFVAQNATGILAGK  | Negative |
| Q07081 | LLTLVLIHAAAAFVAQNATG  | Negative |
| Q07081 | MYICLLTLVLIHAAAAFVAQ  | Negative |
| Q07081 | AAFVAQNATGILAGKDHCVC  | Negative |
| Q07081 | LTTLVLIHAAAAFVAQNATGI | Negative |
| Q07081 | HAAAAFVAQNATGILAGKDH  | Negative |
| Q07081 | TGILAGKDHCVCVLLPDSS   | Negative |
| Q07081 | AAAFVAQNATGILAGKDHCV  | Negative |
| Q07081 | GKDHCVCVLLPDSSFPKR    | Negative |
| Q07081 | CLLTLVLIHAAAAFVAQNAT  | Negative |
| Q07081 | NATGILAGKDHCVCVLLPD   | Negative |
| Q07081 | AQNATGILAGKDHCVCVLL   | Negative |
| Q07081 | AAAAFVAQNATGILAGKDHC  | Negative |
| Q07081 | GILAGKDHCVCVLLPDSSF   | Negative |
| Q07081 | ATGILAGKDHCVCVLLPDS   | Negative |
| Q07081 | TLVLIHAAAAFVAQNATGIL  | Negative |
| Q07081 | ICLLTLVLIHAAAAFVAQNA  | Negative |
| Q07081 | IHAAAAFVAQNATGILAGKD  | Negative |
| Q07081 | AGKDHCVCVLLPDSSFPK    | Negative |
| Q07081 | AFVAQNATGILAGKDHCVC   | Negative |
| Q07081 | LAGKDHCVCVLLPDSSFPA   | Negative |

|        |                       |          |
|--------|-----------------------|----------|
| Q07081 | LVLIIHAAAAFVAQNATGILA | Negative |
| Q07081 | FVAQNATGILAGKDHCVCEV  | Negative |
| Q07081 | ILAGKDHCVCEVLLPDSSFP  | Negative |
| Q07081 | VAQNATGILAGKDHCVCEVL  | Negative |
| Q07081 | QNATGILAGKDHCVCEVLLP  | Negative |
| Q07081 | DHCVCEVLLPDSSFPAKRVG  | Negative |
| Q07092 | HGANTGAQCPSQQEGLKLE   | Negative |
| Q07092 | AQCPSQQEGLKLEHSSSLP   | Negative |
| Q07092 | GAQCPSQQEGLKLEHSSSL   | Negative |
| Q07092 | MWVSWAPGLWLLGLWATFGH  | Negative |
| Q07092 | GHGANTGAQCPSQQEGLKL   | Negative |
| Q07092 | WVSWAPGLWLLGLWATFGHG  | Negative |
| Q07092 | PSQQEGLKLEHSSSLPANV   | Negative |
| Q07092 | VSWAPGLWLLGLWATFGHGA  | Negative |
| Q07092 | LWATFGHGANTGAQCPSQQ   | Negative |
| Q07092 | GANTGAQCPSQQEGLKLEH   | Negative |
| Q07092 | GLWATFGHGANTGAQCPSQ   | Negative |
| Q07092 | TGAQCPSQQEGLKLEHSSS   | Negative |
| Q07092 | PSQQEGLKLEHSSSLPANVT  | Negative |
| Q07092 | WLLGLWATFGHGANTGAQCP  | Negative |
| Q07092 | WAPGLWLLGLWATFGHGANT  | Negative |
| Q07092 | GLWLLGLWATFGHGANTGAQ  | Negative |
| Q07092 | LGLWATFGHGANTGAQCPS   | Negative |
| Q07092 | LLGLWATFGHGANTGAQCPP  | Negative |
| Q07092 | QCPSQQEGLKLEHSSSLPA   | Negative |
| Q07092 | ATFGHGANTGAQCPSQQEG   | Negative |
| Q07092 | ANTGAQCPSQQEGLKLEHS   | Negative |
| Q07092 | WATFGHGANTGAQCPSQQE   | Negative |
| Q07092 | TFGHGANTGAQCPSQQEGL   | Negative |
| Q07092 | SWAPGLWLLGLWATFGHGAN  | Negative |
| Q07092 | APGLWLLGLWATFGHGANTG  | Negative |
| Q07092 | LWLLGLWATFGHGANTGAQC  | Negative |
| Q07092 | CPSQQEGLKLEHSSSLPAN   | Negative |
| Q07092 | FGHGANTGAQCPSQQEGLK   | Negative |
| Q07092 | NTGAQCPSQQEGLKLEHSS   | Negative |
| Q07154 | ALVVGGSCGPPKVPPGPINIT | Negative |
| Q07154 | LANNIMVVGAVLAALVVGG   | Negative |
| Q07154 | KVPPGPINITTNYNGKWLTA  | Negative |
| Q07154 | GSCGPPKVPPGPINITTNYNG | Negative |
| Q07154 | CGPPKVPPGPINITTNYNGKW | Negative |
| Q07154 | LAALVVGGSCGPPKVPPGPN  | Negative |
| Q07154 | SCGPPKVPPGPINITTNYNGK | Negative |
| Q07154 | AVLAALVVGGSCGPPKVPPG  | Negative |
| Q07154 | AALVVGGSCGPPKVPPGPNI  | Negative |
| Q07154 | ANNIMVVGAVLAALVVGGSC  | Negative |
| Q07154 | GPPKVPPGPINITTNYNGKWL | Negative |

|        |                       |          |
|--------|-----------------------|----------|
| Q07154 | PKVPPGPNITTNYNKGWLTA  | Negative |
| Q07154 | VPPGPNITTNYNKGWLTARA  | Negative |
| Q07154 | PPKVPPGPNITTNYNKGWLT  | Negative |
| Q07154 | GGSCGPPKVPPGPNITTNYN  | Negative |
| Q07154 | VGGSCGPPKVPPGPNITTNYN | Negative |
| Q07154 | NIMVVGAVLAALVVGSCGP   | Negative |
| Q07154 | SLANNIMVVGAVLAALVVG   | Negative |
| Q07154 | GAVLAALVVGSCGPPKVPP   | Negative |
| Q07154 | NNIMVVGAVLAALVVGSCG   | Negative |
| Q07154 | LVVGSCGPPKVPPGPNITT   | Negative |
| Q07154 | PPGPNITTNYNKGWLTARAT  | Negative |
| Q07154 | VLAALVVGSCGPPKVPPGP   | Negative |
| Q07154 | VGAVLAALVVGSCGPPKVP   | Negative |
| Q07154 | MGSLANNIMVVGAVLAALVV  | Negative |
| Q07154 | VVGSCGPPKVPPGPNITTN   | Negative |
| Q07154 | GSLANNIMVVGAVLAALVVG  | Negative |
| Q07154 | MVVGAVLAALVVGSCGPPK   | Negative |
| Q07154 | IMVVGAVLAALVVGSCGPP   | Negative |
| Q07203 | QEDLVGNVFLFPKPSVTTYA  | Negative |
| Q07203 | GSLAQEDLVGNVFLFPKPSV  | Negative |
| Q07203 | RFALWFIFLAGSLAQEDLVG  | Negative |
| Q07203 | LAQEDLVGNVFLFPKPSVTT  | Negative |
| Q07203 | VFLFPKPSVTTYAILKPEVE  | Negative |
| Q07203 | KPSVTTYAILKPEVEKPLKN  | Negative |
| Q07203 | FLFPKPSVTTYAILKPEVEK  | Negative |
| Q07203 | FALWFIFLAGSLAQEDLVGN  | Negative |
| Q07203 | LFPKPSVTTYAILKPEVEKP  | Negative |
| Q07203 | LAGSLAQEDLVGNVFLFPKP  | Negative |
| Q07203 | AQEDLVGNVFLFPKPSVTTY  | Negative |
| Q07203 | VGNVFLFPKPSVTTYAILKP  | Negative |
| Q07203 | IFLAGSLAQEDLVGNVFLFP  | Negative |
| Q07203 | EDLVGNVFLFPKPSVTTYAI  | Negative |
| Q07203 | LVGNVFLFPKPSVTTYAILK  | Negative |
| Q07203 | MERFALWFIFLAGSLAQEDL  | Negative |
| Q07203 | AGSLAQEDLVGNVFLFPKPS  | Negative |
| Q07203 | WFIFLAGSLAQEDLVGNVFL  | Negative |
| Q07203 | DLVGNVFLFPKPSVTTYAIL  | Negative |
| Q07203 | GNVFLFPKPSVTTYAILKPE  | Negative |
| Q07203 | ALWFIFLAGSLAQEDLVGNV  | Negative |
| Q07203 | FPKPSVTTYAILKPEVEKPL  | Negative |
| Q07203 | PKPSVTTYAILKPEVEKPLK  | Negative |
| Q07203 | FLAGSLAQEDLVGNVFLFPK  | Negative |
| Q07203 | NVFLFPKPSVTTYAILKPEV  | Negative |
| Q07203 | FIFLAGSLAQEDLVGNVFLF  | Negative |
| Q07203 | PSVTTYAILKPEVEKPLKNL  | Negative |
| Q07203 | SLAQEDLVGNVFLFPKPSVT  | Negative |

|        |                       |          |
|--------|-----------------------|----------|
| Q07203 | LWFIFLAGSLAQEDLVGNVF  | Negative |
| Q07325 | VLFLLGIIILLVLIGVQGTPV | Negative |
| Q07325 | IGVQGTPVVRKGRCSISTN   | Negative |
| Q07325 | RCSCISTNQGTIHLQSLKDL  | Negative |
| Q07325 | LLVLIGVQGTPVVRKGRCS   | Negative |
| Q07325 | KSGVLFLLGIILLVLIGVQG  | Negative |
| Q07325 | VVRKGRCSISTNQGTIHLQ   | Negative |
| Q07325 | IILLVLIGVQGTPVVRKGRC  | Negative |
| Q07325 | GTPVVRKGRCSISTNQGTI   | Negative |
| Q07325 | VRKGRCSISTNQGTIHLQS   | Negative |
| Q07325 | TPVVRKGRCSISTNQGTIH   | Negative |
| Q07325 | LLGIILLVLIGVQGTPVVRK  | Negative |
| Q07325 | KGRCSISTNQGTIHLQSLK   | Negative |
| Q07325 | KKSGVLFLLGIILLVLIGVQ  | Negative |
| Q07325 | GVQGTPVVRKGRCSISTNQ   | Negative |
| Q07325 | PVVRKGRCSISTNQGTIHL   | Negative |
| Q07325 | VLIGVQGTPVVRKGRCSIS   | Negative |
| Q07325 | RKGRCSISTNQGTIHLQSL   | Negative |
| Q07325 | SGVLFLLGIILLVLIGVQGT  | Negative |
| Q07325 | IILLVLIGVQGTPVVRKGRC  | Negative |
| Q07325 | VQGTPVVRKGRCSISTNQG   | Negative |
| Q07325 | QGTPVVRKGRCSISTNQGT   | Negative |
| Q07325 | LIGVQGTPVVRKGRCSIST   | Negative |
| Q07325 | GIILLVLIGVQGTPVVRKGR  | Negative |
| Q07325 | GRCSISTNQGTIHLQSLKD   | Negative |
| Q07325 | LGIILLVLIGVQGTPVVRKG  | Negative |
| Q07325 | GVLFLLGIIILLVLIGVQGTP | Negative |
| Q07325 | LFLLGIILLVLIGVQGTPVV  | Negative |
| Q07325 | LVLIGVQGTPVVRKGRCS    | Negative |
| Q07325 | MKKSGVLFLLGIILLVLIGV  | Negative |
| Q07558 | VVFLAVCICVSQAVSYTDCT  | Negative |
| Q07558 | VFLAVCICVSQAVSYTDCTE  | Negative |
| Q07558 | VCICVSQAVSYTDCTESGQN  | Negative |
| Q07558 | SYTDCTESGQNYCLCVGGNL  | Negative |
| Q07558 | ESGQNYCLCVGGNLCGGGKH  | Negative |
| Q07558 | AVCICVSQAVSYTDCTESGQ  | Negative |
| Q07558 | QAVSYTDCTESGQNYCLCVG  | Negative |
| Q07558 | TDCTESGQNYCLCVGGNLCG  | Negative |
| Q07558 | CVSQAVSYTDCTESGQNYCL  | Negative |
| Q07558 | YTDCTESGQNYCLCVGGNLC  | Negative |
| Q07558 | MFSCLKFVVFLAVCICVSQA  | Negative |
| Q07558 | FLAVCICVSQAVSYTDCTES  | Negative |
| Q07558 | CICVSQAVSYTDCTESGQNY  | Negative |
| Q07558 | SLKLFVVFLAVCICVSQAVS  | Negative |
| Q07558 | GQNYCLCVGGNLCGGGKHCE  | Negative |
| Q07558 | DCTESGQNYCLCVGGNLCGG  | Negative |



|        |                       |          |
|--------|-----------------------|----------|
| Q07558 | CTESGQNYCLCVGGNLCGGG  | Negative |
| Q07558 | AVSYTDCTESGQNYCLCVGG  | Negative |
| Q07558 | SGQNYCLCVGGNLCGGGKHC  | Negative |
| Q07558 | LAVCICVSQAVSYTDCTESG  | Negative |
| Q07558 | LKLFVVFLAVCICVSQAVSY  | Negative |
| Q07558 | VSQAVSYTDCTESGQNYCLC  | Negative |
| Q07558 | VSYTDCTESGQNYCLCVGGN  | Negative |
| Q07558 | FVVFLAVCICVSQAVSYTDC  | Negative |
| Q07558 | TESGQNYCLCVGGNLCGGGK  | Negative |
| Q07558 | KLFVVFLAVCICVSQAVSYT  | Negative |
| Q07558 | SQAVSYTDCTESGQNYCLCV  | Negative |
| Q07558 | ICVSQAVSYTDCTESGQNYC  | Negative |
| Q07558 | FSLKLFVVFLAVCICVSQAV  | Negative |
| Q07654 | RALCMLGLVLALLSSSSAEE  | Negative |
| Q07654 | LCMLGLVLALLSSSSAEEYV  | Negative |
| Q07654 | AEEYVGLSANQCAVPAKDRV  | Negative |
| Q07654 | LSANQCAVPAKDRVDCGYPH  | Negative |
| Q07654 | SSSSAEEYVGLSANQCAVPA  | Negative |
| Q07654 | EYVGLSANQCAVPAKDRVDC  | Negative |
| Q07654 | SAEEYVGLSANQCAVPAKDR  | Negative |
| Q07654 | LLSSSSAEEYVGLSANQCAV  | Negative |
| Q07654 | SSAEEYVGLSANQCAVPAKD  | Negative |
| Q07654 | LGLVLALLSSSSAEEYVGLS  | Negative |
| Q07654 | ALLSSSSAEEYVGLSANQCA  | Negative |
| Q07654 | ARALCMLGLVLALLSSSSAE  | Negative |
| Q07654 | NQCAVPAKDRVDCGYPHVTP  | Negative |
| Q07654 | MLGLVLALLSSSSAEEYVGL  | Negative |
| Q07654 | AARALCMLGLVLALLSSSSA  | Negative |
| Q07654 | LVLALLSSSSAEEYVGLSAN  | Negative |
| Q07654 | LSSSSAEEYVGLSANQCAVP  | Negative |
| Q07654 | EEYVGLSANQCAVPAKDRVDC | Negative |
| Q07654 | VGLSANQCAVPAKDRVDCGY  | Negative |
| Q07654 | YVGLSANQCAVPAKDRVDCG  | Negative |
| Q07654 | GLVLALLSSSSAEEYVGLSA  | Negative |
| Q07654 | MAARALCMLGLVLALLSSSS  | Negative |
| Q07654 | VLALLSSSSAEEYVGLSANQ  | Negative |
| Q07654 | ANQCAVPAKDRVDCGYPHVT  | Negative |
| Q07654 | SSSAEEYVGLSANQCAVPAK  | Negative |
| Q07654 | GLSANQCAVPAKDRVDCGYP  | Negative |
| Q07654 | LALLSSSSAEEYVGLSANQC  | Negative |
| Q07654 | ALCMLGLVLALLSSSSAEEY  | Negative |
| Q07654 | SANQCAVPAKDRVDCGYPHV  | Negative |
| Q07792 | SQASEKLLVLGDSLSAGYQM  | Negative |
| Q07792 | ASEKLLVLGDSLSAGYQMPI  | Negative |
| Q07792 | SEKLLVLGDSLSAGYQMPIE  | Negative |
| Q07792 | SLSAGYQMPIEKSWPSLLPD  | Negative |

|        |                        |          |
|--------|------------------------|----------|
| Q07792 | FCLSAASQASEKLLVLGDSL   | Negative |
| Q07792 | AASQASEKLLVLGDSL SAGY  | Negative |
| Q07792 | GDSL SAGY QMPIEKSWPSLL | Negative |
| Q07792 | MIRLLSLVLFFCLSAASQAS   | Negative |
| Q07792 | LSAGY QMPIEKSWPSLLPDA  | Negative |
| Q07792 | SAASQASEKLLVLGDSL SAG  | Negative |
| Q07792 | LFFCLSAASQASEKLLVLGD   | Negative |
| Q07792 | DSL SAGY QMPIEKSWPSLLP | Negative |
| Q07792 | LSAASQASEKLLVLGDSL SA  | Negative |
| Q07792 | VLFFCLSAASQASEKLLVLG   | Negative |
| Q07792 | LVLFFCLSAASQASEKLLVL   | Negative |
| Q07792 | LLVLGDSL SAGY QMPIEKSW | Negative |
| Q07792 | LGDSL SAGY QMPIEKSWPSL | Negative |
| Q07792 | RLLSLVLFFCLSAASQASEK   | Negative |
| Q07792 | SLVLFFCLSAASQASEKLLV   | Negative |
| Q07792 | LVLGDSL SAGY QMPIEKSWP | Negative |
| Q07792 | IRLLSLVLFFCLSAASQASE   | Negative |
| Q07792 | LLSLVLFFCLSAASQASEKL   | Negative |
| Q07792 | VLGDSL SAGY QMPIEKSWPS | Negative |
| Q07792 | CLSAASQASEKLLVLGDSL S  | Negative |
| Q07792 | FFCLSAASQASEKLLVLGDS   | Negative |
| Q07792 | QASEKLLVLGDSL SAGY QMP | Negative |
| Q07792 | EKLLVLGDSL SAGY QMPIEK | Negative |
| Q07792 | ASQASEKLLVLGDSL SAGYQ  | Negative |
| Q07792 | KLLVLGDSL SAGY QMPIEKS | Negative |
| Q07831 | KAIVFVLIFAVAFVTLRQG    | Negative |
| Q07831 | AVAFVTLRQGPIVCNLCTG    | Negative |
| Q07831 | LCTGLINTLENLLTTKGADK   | Negative |
| Q07831 | FAVTLRQGPIVCNLCTGLIN   | Negative |
| Q07831 | LIFAVAFVTLRQGPIVCNL    | Negative |
| Q07831 | MKAIVFVLIFAVAFVTLRQ    | Negative |
| Q07831 | AFVTLRQGPIVCNLCTGLI    | Negative |
| Q07831 | PIVCNLCTGLINTLENLLTT   | Negative |
| Q07831 | VFVLIFAVAFVTLRQGPIV    | Negative |
| Q07831 | RQGPIVCNLCTGLINTLENL   | Negative |
| Q07831 | IVCNLCTGLINTLENLLTTK   | Negative |
| Q07831 | CTGLINTLENLLTTKGADKV   | Negative |
| Q07831 | AIVFVLIFAVAFVTLRQGP    | Negative |
| Q07831 | NLCTGLINTLENLLTTKGAD   | Negative |
| Q07831 | QGPIVCNLCTGLINTLENLL   | Negative |
| Q07831 | FAVAFVTLRQGPIVCNLCT    | Negative |
| Q07831 | LRQGPIVCNLCTGLINTLEN   | Negative |
| Q07831 | VTLRQGPIVCNLCTGLINTL   | Negative |
| Q07831 | VLIFAVAFVTLRQGPIVCN    | Negative |
| Q07831 | GLINTLENLLTTKGADKVKD   | Negative |
| Q07831 | IVFVLIFAVAFVTLRQGPI    | Negative |

|        |                        |          |
|--------|------------------------|----------|
| Q07831 | GPIVCNLCTGLINTLENLLT   | Negative |
| Q07831 | VCNLCTGLINTLENLLTTKG   | Negative |
| Q07831 | TLRQGPIVCNLCTGLINTLE   | Negative |
| Q07831 | TGLINTLENLLTTKGADKVK   | Negative |
| Q07831 | VAFVAVTLRQGPIVCNLCTGL  | Negative |
| Q07831 | IFAVAFVAVTLRQGPIVCNLC  | Negative |
| Q07831 | AVTLRQGPIVCNLCTGLINT   | Negative |
| Q07831 | CNLCTGLINTLENLLTTKGA   | Negative |
| Q07WU7 | AGLMGTAVAADNLAEFHVQN   | Negative |
| Q07WU7 | LAVCIATLMGTAGLMGTAVA   | Negative |
| Q07WU7 | AVAADNLAEFHVQNECDSC    | Negative |
| Q07WU7 | GTAGLMGTAVAADNLAEFHV   | Negative |
| Q07WU7 | TAGLMGTAVAADNLAEFHVQ   | Negative |
| Q07WU7 | NLAVCIATLMGTAGLMGTAV   | Negative |
| Q07WU7 | VAADNLAEFHVQNECDSCH    | Negative |
| Q07WU7 | CIATLMGTAGLMGTAVAADN   | Negative |
| Q07WU7 | TLMGTAGLMGTAVAADNLAE   | Negative |
| Q07WU7 | LMGTAVAADNLAEFHVQNQE   | Negative |
| Q07WU7 | GLMGTAADNLAEFHVQNNQ    | Negative |
| Q07WU7 | MKKMNLAVCIATLMGTAGLM   | Negative |
| Q07WU7 | KKMNLAVCIATLMGTAGLMG   | Negative |
| Q07WU7 | LMGTAGLMGTAVAADNLAEF   | Negative |
| Q07WU7 | AEFHVQNECDSCHTPDGEL    | Negative |
| Q07WU7 | TAVAADNLAEFHVQNECDSC   | Negative |
| Q07WU7 | MGTAGLMGTAVAADNLAEFH   | Negative |
| Q07WU7 | MGTAVAADNLAEFHVQNEC    | Negative |
| Q07WU7 | VCIATLMGTAGLMGTAVAAD   | Negative |
| Q07WU7 | GTAVAADNLAEFHVQNECD    | Negative |
| Q07WU7 | MNLAVCIATLMGTAGLMGTA   | Negative |
| Q07WU7 | ADNLAEFHVQNECDSCHTP    | Negative |
| Q07WU7 | NLAEFHVQNECDSCHTPDG    | Negative |
| Q07WU7 | IATLMGTAGLMGTAVAADNL   | Negative |
| Q07WU7 | LAEFHVQNECDSCHTPDGE    | Negative |
| Q07WU7 | AADNLAEFHVQNECDSCHT    | Negative |
| Q07WU7 | AVCIATLMGTAGLMGTAVAA   | Negative |
| Q07WU7 | KMNLAVCIATLMGTAGLMGT   | Negative |
| Q07WU7 | DNLAEFHVQNECDSCHTPD    | Negative |
| Q08127 | SPVDYTLTYVEKPECDFCVAI  | Negative |
| Q08127 | DYTLTYVEKPECDFCVAINTT  | Negative |
| Q08127 | PVDYTLTYVEKPECDFCVAIN  | Negative |
| Q08127 | LLAGQVLSICSPPVDYTLTYVE | Negative |
| Q08127 | VLLASAVLCLLAGQVLSICS   | Negative |
| Q08127 | SAVLCLLAGQVLSICSPPVDY  | Negative |
| Q08127 | LLASAVLCLLAGQVLSICSP   | Negative |
| Q08127 | TLTYVEKPECDFCVAINTTIC  | Negative |
| Q08127 | LCLLAGQVLSICSPPVDYTLTY | Negative |

|        |                       |          |
|--------|-----------------------|----------|
| Q08127 | CSPVDYTLTYVEKPECDFCVA | Negative |
| Q08127 | LAGQVLSICSPVDYTLTYVEK | Negative |
| Q08127 | GQVLSICSPVDYTLTYVEKPE | Negative |
| Q08127 | SICSPVDYTLTYVEKPECDFC | Negative |
| Q08127 | ASAVLCLLAGQVLSICSPVD  | Negative |
| Q08127 | VLCLLAGQVLSICSPVDYTL  | Negative |
| Q08127 | QVLSICSPVDYTLTYVEKPEC | Negative |
| Q08127 | CLLAGQVLSICSPVDYTLTYV | Negative |
| Q08127 | LSICSPVDYTLTYVEKPECDF | Negative |
| Q08127 | RVVLLASAVLCLLAGQVLSI  | Negative |
| Q08127 | VLSICSPVDYTLTYVEKPEC  | Negative |
| Q08127 | AGQVLSICSPVDYTLTYVEKP | Negative |
| Q08127 | MRVLLASAVLCLLAGQVLS   | Negative |
| Q08127 | YVEKPECDFCVAINTTICMG  | Negative |
| Q08127 | VVLLASAVLCLLAGQVLSIC  | Negative |
| Q08127 | LYVEKPECDFCVAINTTICM  | Negative |
| Q08127 | AVLCLLAGQVLSICSPVDYT  | Negative |
| Q08127 | VDYTLTYVEKPECDFCVAINT | Negative |
| Q08127 | YTLTYVEKPECDFCVAINTTI | Negative |
| Q08127 | ICSPVDYTLTYVEKPECDFCV | Negative |
| Q08380 | ADGGATNQGRVEIFYRGQWG  | Negative |
| Q08380 | AGTQGVNDGDMRLADGGATN  | Negative |
| Q08380 | GATNQGRVEIFYRGQWGTV   | Negative |
| Q08380 | GGATNQGRVEIFYRGQWGT   | Negative |
| Q08380 | DGGATNQGRVEIFYRGQWGT  | Negative |
| Q08380 | GVNDGDMRLADGGATNQGRV  | Negative |
| Q08380 | VNDGDMRLADGGATNQGRVE  | Negative |
| Q08380 | DMRLADGGATNQGRVEIFYR  | Negative |
| Q08380 | LADGGATNQGRVEIFYRGQW  | Negative |
| Q08380 | RLADGGATNQGRVEIFYRGQ  | Negative |
| Q08380 | NDGDMRLADGGATNQGRVEI  | Negative |
| Q08380 | TQGVNDGDMRLADGGATNQ   | Negative |
| Q08380 | GTQGVNDGDMRLADGGATNQ  | Negative |
| Q08380 | WLLVAGTQGVNDGDMRLADG  | Negative |
| Q08380 | TPPRLFVWLLVAGTQGVND   | Negative |
| Q08380 | GDMRLADGGATNQGRVEIFY  | Negative |
| Q08380 | QGVNDGDMRLADGGATNQGR  | Negative |
| Q08380 | VWLLVAGTQGVNDGDMRLAD  | Negative |
| Q08380 | PPRLFVWLLVAGTQGVNDG   | Negative |
| Q08380 | VAGTQGVNDGDMRLADGGAT  | Negative |
| Q08380 | RLFVWLLVAGTQGVNDGDM   | Negative |
| Q08380 | FWVWLLVAGTQGVNDGDMRL  | Negative |
| Q08380 | MTPPRLFVWLLVAGTQGVN   | Negative |
| Q08380 | WVWLLVAGTQGVNDGDMRLA  | Negative |
| Q08380 | LFVWLLVAGTQGVNDGDMR   | Negative |
| Q08380 | MRLADGGATNQGRVEIFYRG  | Negative |

|        |                      |          |
|--------|----------------------|----------|
| Q08380 | LLVAGTQGVNDGDMRLADGG | Negative |
| Q08380 | LVAGTQGVNDGDMRLADGGA | Negative |
| Q08380 | DGDMRLADGGATNQGRVEIF | Negative |
| Q08738 | PFQYNRVYSTVSPFVYKPGR | Negative |
| Q08738 | AAETGKYTPFQYNRVYSTVS | Negative |
| Q08738 | KYTPFQYNRVYSTVSPFVYK | Negative |
| Q08738 | FQYNRVYSTVSPFVYKPGRY | Negative |
| Q08738 | GKYTPFQYNRVYSTVSPFVY | Negative |
| Q08738 | RVYSTVSPFVYKPGRYVADP | Negative |
| Q08738 | TVALAAETGKYTPFQYNRVY | Negative |
| Q08738 | LAAETGKYTPFQYNRVYSTV | Negative |
| Q08738 | NRVYSTVSPFVYKPGRYVAD | Negative |
| Q08738 | FLAICLSLTVALAAETGKYT | Negative |
| Q08738 | AICLSLTVALAAETGKYTPF | Negative |
| Q08738 | VALAAETGKYTPFQYNRVYS | Negative |
| Q08738 | ETGKYTPFQYNRVYSTVSPF | Negative |
| Q08738 | CLSLTVALAAETGKYTPFQY | Negative |
| Q08738 | AETGKYTPFQYNRVYSTVSP | Negative |
| Q08738 | YNRVYSTVSPFVYKPGRYVA | Negative |
| Q08738 | TGKYTPFQYNRVYSTVSPFV | Negative |
| Q08738 | TPFQYNRVYSTVSPFVYKPG | Negative |
| Q08738 | QYNRVYSTVSPFVYKPGRYV | Negative |
| Q08738 | VFLAICLSLTVALAAETGKY | Negative |
| Q08738 | MRVFLAICLSLTVALAAETG | Negative |
| Q08738 | LTVALAAETGKYTPFQYNRV | Negative |
| Q08738 | LAICLSLTVALAAETGKYTP | Negative |
| Q08738 | ICLSLTVALAAETGKYTPFQ | Negative |
| Q08738 | VYSTVSPFVYKPGRYVADPG | Negative |
| Q08738 | ALAAETGKYTPFQYNRVYST | Negative |
| Q08738 | LSLTVALAAETGKYTPFQYN | Negative |
| Q08738 | SLTVALAAETGKYTPFQYNR | Negative |
| Q08738 | YTPFQYNRVYSTVSPFVYKP | Negative |
| Q08879 | PVPSRLVPLLLLLSSLSLL  | Negative |
| Q08879 | ARANADISMEACCTDGNQMA | Negative |
| Q08879 | LVPLLLLLSSLSLLAARAN  | Negative |
| Q08879 | RPVPSRLVPLLLLLSSLSL  | Negative |
| Q08879 | DISMEACCTDGNQMANQHRD | Negative |
| Q08879 | RANADISMEACCTDGNQMAN | Negative |
| Q08879 | AARANADISMEACCTDGNQM | Negative |
| Q08879 | SLSLLAARANADISMEACCT | Negative |
| Q08879 | NADISMEACCTDGNQMANQH | Negative |
| Q08879 | PLLLLLSSLSLLAARANAD  | Negative |
| Q08879 | SRLVPLLLLLSSLSLLAAR  | Negative |
| Q08879 | LLSSLSLLAARANADISMEA | Negative |
| Q08879 | ADISMEACCTDGNQMANQHR | Negative |
| Q08879 | PSRLVPLLLLLSSLSLLAA  | Negative |

|        |                       |          |
|--------|-----------------------|----------|
| Q08879 | LLLLSSLSLLAARANADISM  | Negative |
| Q08879 | ERPVPSRLVPLPLLLLSSLS  | Negative |
| Q08879 | RLVPLPLLLLSSLSLLAARA  | Negative |
| Q08879 | SSLSLLAARANADISMEACC  | Negative |
| Q08879 | LSSLSLLAARANADISMEAC  | Negative |
| Q08879 | LPLLLLSSLSLLAARANADI  | Negative |
| Q08879 | SLLAARANADISMEACCTDG  | Negative |
| Q08879 | VPSRLVPLPLLLLSSLSLLA  | Negative |
| Q08879 | ANADISMEACCTDGNQMANQ  | Negative |
| Q08879 | LAARANADISMEACCTDGNQ  | Negative |
| Q08879 | PLLLLSSLSLLAARANADIS  | Negative |
| Q08879 | MERPVP SRLVPLPLLLLSSL | Negative |
| Q08879 | LSLLAARANADISMEACCTD  | Negative |
| Q08879 | VPLPLLLLSSLSLLAARANA  | Negative |
| Q08879 | LLAARANADISMEACCTDGN  | Negative |
| Q08IS0 | PTFAADDDEAARLKAIEEYR  | Negative |
| Q08IS0 | STAIAPTFAADDDEAARLKA  | Negative |
| Q08IS0 | SSTAIAPTFAADDDEAARLK  | Negative |
| Q08IS0 | KKTVTAVALLCALSSSTAIAP | Negative |
| Q08IS0 | VALLCALSSSTAIAPTFAADD | Negative |
| Q08IS0 | AIAPTFAADDDEAARLKAIE  | Negative |
| Q08IS0 | ALLCALSSSTAIAPTFAADDD | Negative |
| Q08IS0 | KTVTAVALLCALSSSTAIAPT | Negative |
| Q08IS0 | ALSSTAIAPTFAADDDEAAR  | Negative |
| Q08IS0 | AVALLCALSSSTAIAPTFAAD | Negative |
| Q08IS0 | ADDDEAARLKAIEEYRKQIA  | Negative |
| Q08IS0 | DDDEAARLKAIEEYRKQIAD  | Negative |
| Q08IS0 | IAPTFAADDDEAARLKAIEE  | Negative |
| Q08IS0 | AADDDEAARLKAIEEYRKQI  | Negative |
| Q08IS0 | LSSTAIAPTFAADDDEAARL  | Negative |
| Q08IS0 | LCALSSSTAIAPTFAADDDEA | Negative |
| Q08IS0 | TAIAPTFAADDDEAARLKAIE | Negative |
| Q08IS0 | TFAADDDEAARLKAIEEYRK  | Negative |
| Q08IS0 | DDEAARLKAIEEYRKQIADG  | Negative |
| Q08IS0 | DEAARLKAIEEYRKQIADGN  | Negative |
| Q08IS0 | VTAVALLCALSSSTAIAPTFA | Negative |
| Q08IS0 | AARLKAIEEYRKQIADGNPS  | Negative |
| Q08IS0 | CALSSSTAIAPTFAADDDEAA | Negative |
| Q08IS0 | EAARLKAIEEYRKQIADGNP  | Negative |
| Q08IS0 | TVTAVALLCALSSSTAIAPTF | Negative |
| Q08IS0 | TAVALLCALSSSTAIAPTFAA | Negative |
| Q08IS0 | APTFAADDDEAARLKAIEEY  | Negative |
| Q08IS0 | MKKTVTAVALLCALSSSTAI  | Negative |
| Q08IS0 | FAADDDEAARLKAIEEYRKQ  | Negative |
| Q09022 | VFFLVCVITLGEALKCVNLQ  | Negative |
| Q09022 | IKMTQECAKEDTKCLTLRSL  | Negative |

|        |                      |          |
|--------|----------------------|----------|
| Q09022 | KMTQECAKEDTKCLTLRSLK | Negative |
| Q09022 | NGIKMTQECAKEDTKCLTLR | Negative |
| Q09022 | FLVCVITLGEALKCVNLQAN | Negative |
| Q09022 | ALKCVNLQANGIKMTQECAK | Negative |
| Q09022 | ITLGEALKCVNLQANGIKMT | Negative |
| Q09022 | FFLVCVITLGEALKCVNLQA | Negative |
| Q09022 | CVITLGEALKCVNLQANGIK | Negative |
| Q09022 | QANGIKMTQECAKEDTKCLT | Negative |
| Q09022 | IVFFLVCVITLGEALKCVNL | Negative |
| Q09022 | MRYAIVFFLVCVITLGEALK | Negative |
| Q09022 | VCVITLGEALKCVNLQANGI | Negative |
| Q09022 | RYAIVFFLVCVITLGEALKC | Negative |
| Q09022 | LVCVITLGEALKCVNLQANG | Negative |
| Q09022 | KCVNLQANGIKMTQECAKED | Negative |
| Q09022 | TLGEALKCVNLQANGIKMTQ | Negative |
| Q09022 | LQANGIKMTQECAKEDTKCL | Negative |
| Q09022 | VITLGEALKCVNLQANGIKM | Negative |
| Q09022 | NLQANGIKMTQECAKEDTKC | Negative |
| Q09022 | LKCVNLQANGIKMTQECAKE | Negative |
| Q09022 | GIKMTQECAKEDTKCLTLRS | Negative |
| Q09022 | CVNLQANGIKMTQECAKEDT | Negative |
| Q09022 | YAIVFFLVCVITLGEALKCV | Negative |
| Q09022 | VNLQANGIKMTQECAKEDTK | Negative |
| Q09022 | LGEALKCVNLQANGIKMTQE | Negative |
| Q09022 | EALKCVNLQANGIKMTQECA | Negative |
| Q09022 | ANGIKMTQECAKEDTKCLTL | Negative |
| Q09022 | GEALKCVNLQANGIKMTQEC | Negative |
| Q09098 | VILSFLCFVEGLICNSCEKS | Negative |
| Q09098 | IVILSFLCFVEGLICNSCEK | Negative |
| Q09098 | KISTLLIVILSFLCFVEGLI | Negative |
| Q09098 | ILSFLCFVEGLICNSCEKSR | Negative |
| Q09098 | SFLCFVEGLICNSCEKSRDS | Negative |
| Q09098 | GLICNSCEKSRDSRCTMSQS | Negative |
| Q09098 | ICNSCEKSRDSRCTMSQSRC | Negative |
| Q09098 | TKISTLLIVILSFLCFVEGL | Negative |
| Q09098 | LCFVEGLICNSCEKSRDSRC | Negative |
| Q09098 | NSCEKSRDSRCTMSQSRCVA | Negative |
| Q09098 | VTKISTLLIVILSFLCFVEG | Negative |
| Q09098 | LLIVILSFLCFVEGLICNSC | Negative |
| Q09098 | SCEKSRDSRCTMSQSRCVAK | Negative |
| Q09098 | CEKSRDSRCTMSQSRCVAKP | Negative |
| Q09098 | EKSRDSRCTMSQSRCVAKPG | Negative |
| Q09098 | FLCFVEGLICNSCEKSRDSR | Negative |
| Q09098 | STLLIVILSFLCFVEGLICN | Negative |
| Q09098 | SVTKISTLLIVILSFLCFVE | Negative |
| Q09098 | LICNSCEKSRDSRCTMSQSR | Negative |

|        |                      |          |
|--------|----------------------|----------|
| Q09098 | EGLICNSCEKSRDSRCTMSQ | Negative |
| Q09098 | LIVLSFLCFVEGLICNSCE  | Negative |
| Q09098 | CNSCEKSRDSRCTMSQSRCV | Negative |
| Q09098 | FVEGLICNSCEKSRDSRCTM | Negative |
| Q09098 | MNSVTKISTLLIVLSFLCF  | Negative |
| Q09098 | CFVEGLICNSCEKSRDSRCT | Negative |
| Q09098 | ISTLLIVLSFLCFVEGLIC  | Negative |
| Q09098 | LSFLCFVEGLICNSCEKSRD | Negative |
| Q09098 | VEGLICNSCEKSRDSRCTMS | Negative |
| Q09098 | NSVTKISTLLIVLSFLCFV  | Negative |
| Q09117 | SLRDPIAEIERSNCKIAHLR | Negative |
| Q09117 | QASLRDPIAEIERSNCKIAH | Negative |
| Q09117 | EIERSNCKIAHLRLGLVFTS | Negative |
| Q09117 | MPQQSMQASLRDPIAEIERS | Negative |
| Q09117 | QSMQASLRDPIAEIERSNCK | Negative |
| Q09117 | IAHLRLGLVFTSDNNERALQ | Negative |
| Q09117 | KIAHLRLGLVFTSDNNERAL | Negative |
| Q09117 | HLRLGLVFTSDNNERALQDS | Negative |
| Q09117 | PQQSMQASLRDPIAEIERSN | Negative |
| Q09117 | RLGLVFTSDNNERALQDSGL | Negative |
| Q09117 | RSNCKIAHLRLGLVFTSDNN | Negative |
| Q09117 | GLVFTSDNNERALQDSGLYS | Negative |
| Q09117 | AEIERSNCKIAHLRLGLVFT | Negative |
| Q09117 | IERSNCKIAHLRLGLVFTSD | Negative |
| Q09117 | DPIAEIERSNCKIAHLRLGL | Negative |
| Q09117 | IAEIERSNCKIAHLRLGLVF | Negative |
| Q09117 | SNCKIAHLRLGLVFTSDNNE | Negative |
| Q09117 | NCKIAHLRLGLVFTSDNNER | Negative |
| Q09117 | LGLVFTSDNNERALQDSGLY | Negative |
| Q09117 | PIAEIERSNCKIAHLRLGLV | Negative |
| Q09117 | LRLGLVFTSDNNERALQDSG | Negative |
| Q09117 | ASLRDPIAEIERSNCKIAHL | Negative |
| Q09117 | AHLRLGLVFTSDNNERALQD | Negative |
| Q09117 | QQSMQASLRDPIAEIERSNC | Negative |
| Q09117 | RDPIAEIERSNCKIAHLRLG | Negative |
| Q09117 | CKIAHLRLGLVFTSDNNERA | Negative |
| Q09117 | ERSNCKIAHLRLGLVFTSDN | Negative |
| Q09117 | MQASLRDPIAEIERSNCKIA | Negative |
| Q09117 | SMQASLRDPIAEIERSNCKI | Negative |
| Q09131 | ALALVLSACVMCNGGSSSPF | Negative |
| Q09131 | MCNGGSSSPFIRKVEKTVDM | Negative |
| Q09131 | CVMCNGGSSSPFIRKVEKTV | Negative |
| Q09131 | FIRKVEKTVDMPLDSVFAV  | Negative |
| Q09131 | SSPFIRKVEKTVDMPLDSV  | Negative |
| Q09131 | ALVLSACVMCNGGSSSPFIR | Negative |
| Q09131 | GSSSPFIRKVEKTVDMPLDS | Negative |



|        |                      |          |
|--------|----------------------|----------|
| Q09131 | VMCNGGSSSPFIRKVEKTV  | Negative |
| Q09131 | GLLALALVLSACVMCNGGSS | Negative |
| Q09131 | LSACVMCNGGSSSPFIRKVE | Negative |
| Q09131 | NGGSSSPFIRKVEKTVDMPL | Negative |
| Q09131 | SPFIRKVEKTVDMPLDSDVF | Negative |
| Q09131 | MGVVEGLLALALVLSACVMC | Negative |
| Q09131 | IRKVEKTVDMPLDSDVFAVP | Negative |
| Q09131 | LLALALVLSACVMCNGGSSS | Negative |
| Q09131 | GVVEGLLALALVLSACVMCN | Negative |
| Q09131 | LALVLSACVMCNGGSSSPFI | Negative |
| Q09131 | SSSPFIRKVEKTVDMPLDSD | Negative |
| Q09131 | GGSSSPFIRKVEKTVDMPLD | Negative |
| Q09131 | LVLSACVMCNGGSSSPFIRK | Negative |
| Q09131 | RKVEKTVDMPLDSDVFAVPP | Negative |
| Q09131 | EGLLALALVLSACVMCNGGS | Negative |
| Q09131 | VVEGLLALALVLSACVMCNG | Negative |
| Q09131 | LALALVLSACVMCNGGSSSP | Negative |
| Q09131 | SACVMCNGGSSSPFIRKVEK | Negative |
| Q09131 | VLSACVMCNGGSSSPFIRKV | Negative |
| Q09131 | CNGGSSSPFIRKVEKTVDM  | Negative |
| Q09131 | VEGLLALALVLSACVMCNGG | Negative |
| Q09131 | PFIRKVEKTVDMPLDSDVFA | Negative |
| Q09140 | TLITICYAAKPLDVKIAATF | Negative |
| Q09140 | AAKPLDVKIAATFNAPSFS  | Negative |
| Q09140 | VKIAATFNAPSFSALIAESL | Negative |
| Q09140 | AATFNAPSFSALIAESLYQE | Negative |
| Q09140 | ATLITICYAAKPLDVKIAAT | Negative |
| Q09140 | LITICYAAKPLDVKIAATFN | Negative |
| Q09140 | FAIATLITICYAAKPLDVKI | Negative |
| Q09140 | ITICYAAKPLDVKIAATFNA | Negative |
| Q09140 | IAATFNAPSFSALIAESLYQ | Negative |
| Q09140 | PLDVKIAATFNAPSFSALIA | Negative |
| Q09140 | KIAATFNAPSFSALIAESLY | Negative |
| Q09140 | DVKIAATFNAPSFSALIAES | Negative |
| Q09140 | YAAKPLDVKIAATFNAPSFS | Negative |
| Q09140 | LDVKIAATFNAPSFSALIAE | Negative |
| Q09140 | IATLITICYAAKPLDVKIAA | Negative |
| Q09140 | WFAIATLITICYAAKPLDVK | Negative |
| Q09140 | KPLDVKIAATFNAPSFSALI | Negative |
| Q09140 | WGFWFAIATLITICYAAKPL | Negative |
| Q09140 | MRWGFWFAIATLITICYAAK | Negative |
| Q09140 | FWFAIATLITICYAAKPLDV | Negative |
| Q09140 | AKPLDVKIAATFNAPSFSAL | Negative |
| Q09140 | FNAPSFSALIAESLYQEKKE | Negative |
| Q09140 | RWGFWFAIATLITICYAAKP | Negative |
| Q09140 | ATFNAPSFSALIAESLYQEK | Negative |

|        |                       |          |
|--------|-----------------------|----------|
| Q09140 | TICYAAKPLDVKIAATFNAP  | Negative |
| Q09140 | AIATLITICYAAKPLDVKIA  | Negative |
| Q09140 | ICYAAKPLDVKIAATFNAPS  | Negative |
| Q09140 | TFNAPSFSALIAESLYQEKK  | Negative |
| Q09140 | CYAAKPLDVKIAATFNAPSF  | Negative |
| Q09332 | QSYPIITTLINAKWTQTPLYL | Negative |
| Q09332 | VLIALYTPTSGESSQSYPI   | Negative |
| Q09332 | ESSQSYPIITTLINAKWTQTP | Negative |
| Q09332 | LYTPTSGESSQSYPIITTLIN | Negative |
| Q09332 | PTSGESSQSYPIITTLINAKW | Negative |
| Q09332 | SSQSYPIITTLINAKWTQTPL | Negative |
| Q09332 | MLRAVALCVSVVLIALYTPT  | Negative |
| Q09332 | LCVSVVLIALYTPTSGESSQ  | Negative |
| Q09332 | GESSQSYPIITTLINAKWTQT | Negative |
| Q09332 | IALYTPTSGESSQSYPIITTL | Negative |
| Q09332 | ALYTPTSGESSQSYPIITTLI | Negative |
| Q09332 | AVALCVSVVLIALYTPTSGE  | Negative |
| Q09332 | LIALYTPTSGESSQSYPIIT  | Negative |
| Q09332 | VVLIALYTPTSGESSQSYPI  | Negative |
| Q09332 | TPTSGESSQSYPIITTLINAK | Negative |
| Q09332 | RAVALCVSVVLIALYTPTSG  | Negative |
| Q09332 | YPITTLINAKWTQTPLYLEI  | Negative |
| Q09332 | SGESSQSYPIITTLINAKWTQ | Negative |
| Q09332 | VALCVSVVLIALYTPTSGES  | Negative |
| Q09332 | ALCVSVVLIALYTPTSGESS  | Negative |
| Q09332 | LRAVALCVSVVLIALYTPTS  | Negative |
| Q09332 | SVVLIALYTPTSGESSQSY   | Negative |
| Q09332 | ITTLINAKWTQTPLYLEIAE  | Negative |
| Q09332 | SQSYPIITTLINAKWTQTPLY | Negative |
| Q09332 | YTPTSGESSQSYPIITTLINA | Negative |
| Q09332 | TSGESSQSYPIITTLINAKWT | Negative |
| Q09332 | SYPIITTLINAKWTQTPLYLE | Negative |
| Q09332 | PITTLINAKWTQTPLYLEIA  | Negative |
| Q09332 | VSVVLIALYTPTSGESSQSY  | Negative |
| Q0GY40 | TVLCFLGIVTIVSCGWMSEK  | Negative |
| Q0GY40 | QGILDKKLPEGIIRNAAKAI  | Negative |
| Q0GY40 | VTIVSCGWMSEKKVQGILDK  | Negative |
| Q0GY40 | GWMSEKKVQGILDKKLPEGI  | Negative |
| Q0GY40 | GILDKKLPEGIIRNAAKAIV  | Negative |
| Q0GY40 | FLGIVTIVSCGWMSEKKVQG  | Negative |
| Q0GY40 | SEKKVQGILDKKLPEGIIRN  | Negative |
| Q0GY40 | GIVTIVSCGWMSEKKVQGIL  | Negative |
| Q0GY40 | TKLTVLCFLGIVTIVSCGWM  | Negative |
| Q0GY40 | VQGILDKKLPEGIIRNAAKA  | Negative |
| Q0GY40 | IVTIVSCGWMSEKKVQGILD  | Negative |
| Q0GY40 | LCFLGIVTIVSCGWMSEKKV  | Negative |

|        |                      |          |
|--------|----------------------|----------|
| Q0GY40 | KVQGILDKKLPEGIIRNAAK | Negative |
| Q0GY40 | TIVSCGWMSEKKVQGILDKK | Negative |
| Q0GY40 | VSCGWMSEKKVQGILDKKL  | Negative |
| Q0GY40 | MNTKLTVLCFLGIVTIVSCG | Negative |
| Q0GY40 | MSEKKVQGILDKKLPEGIIR | Negative |
| Q0GY40 | CFLGIVTIVSCGWMSEKKVQ | Negative |
| Q0GY40 | LGIVTIVSCGWMSEKKVQGI | Negative |
| Q0GY40 | SCGWMSEKKVQGILDKKLPE | Negative |
| Q0GY40 | KKVQGILDKKLPEGIIRNAA | Negative |
| Q0GY40 | KLTVLCFLGIVTIVSCGWMS | Negative |
| Q0GY40 | EKKVQGILDKKLPEGIIRNA | Negative |
| Q0GY40 | IVSCGWMSEKKVQGILDKKL | Negative |
| Q0GY40 | NTKLTVLCFLGIVTIVSCGW | Negative |
| Q0GY40 | WMSEKKVQGILDKKLPEGII | Negative |
| Q0GY40 | ILDKKLPEGIIRNAAKAIVH | Negative |
| Q0GY40 | CGWMSEKKVQGILDKKLPEG | Negative |
| Q0GY40 | VLCFLGIVTIVSCGWMSEKK | Negative |
| Q0IQK9 | LLAAPHAAVAITCGQVNSAV | Negative |
| Q0IQK9 | GQVNSAVGPCLTYARGGAGP | Negative |
| Q0IQK9 | LAAPHAAVAITCGQVNSAVG | Negative |
| Q0IQK9 | VAALLLAAPHAAVAITCGQV | Negative |
| Q0IQK9 | LVLVALVAALLLAAPHAAVA | Negative |
| Q0IQK9 | TCGQVNSAVGPCLTYARGGA | Negative |
| Q0IQK9 | QLVLVALVAALLLAAPHAAV | Negative |
| Q0IQK9 | ITCGQVNSAVGPCLTYARGG | Negative |
| Q0IQK9 | LLAAPHAAVAITCGQVNSA  | Negative |
| Q0IQK9 | APHAAVAITCGQVNSAVGPC | Negative |
| Q0IQK9 | AAPHAAVAITCGQVNSAVGP | Negative |
| Q0IQK9 | CGQVNSAVGPCLTYARGGAG | Negative |
| Q0IQK9 | VALVAALLLAAPHAAVAITC | Negative |
| Q0IQK9 | ALLLAAPHAAVAITCGQVNS | Negative |
| Q0IQK9 | MARAQLVLVALVAALLLAAP | Negative |
| Q0IQK9 | AVAITCGQVNSAVGPCLTYA | Negative |
| Q0IQK9 | ALVAALLLAAPHAAVAITCG | Negative |
| Q0IQK9 | ARAQLVLVALVAALLLAAPH | Negative |
| Q0IQK9 | VAITCGQVNSAVGPCLTYAR | Negative |
| Q0IQK9 | AAVAITCGQVNSAVGPCLTY | Negative |
| Q0IQK9 | AITCGQVNSAVGPCLTYARG | Negative |
| Q0IQK9 | AALLLAAPHAAVAITCGQVN | Negative |
| Q0IQK9 | HAAVAITCGQVNSAVGPCLT | Negative |
| Q0IQK9 | QVNSAVGPCLTYARGGAGPS | Negative |
| Q0IQK9 | RAQLVLVALVAALLLAAPHA | Negative |
| Q0IQK9 | PHAAVAITCGQVNSAVGPCL | Negative |
| Q0IQK9 | VLVALVAALLLAAPHAAVAI | Negative |
| Q0IQK9 | AQLVLVALVAALLLAAPHAA | Negative |
| Q0IQK9 | LVALVAALLLAAPHAAVAIT | Negative |

|        |                      |          |
|--------|----------------------|----------|
| Q0P9X8 | LAVFALGACVAFSNANAAEG | Negative |
| Q0P9X8 | GKLESIKSKGQLIVGVKNDV | Negative |
| Q0P9X8 | LKLAVFALGACVAFSNANAA | Negative |
| Q0P9X8 | CVAFSNANAAEGKLESIKSK | Negative |
| Q0P9X8 | FALGACVAFSNANAAEGKLE | Negative |
| Q0P9X8 | FRKSLLKLAVFALGACVAFS | Negative |
| Q0P9X8 | ALGACVAFSNANAAEGKLES | Negative |
| Q0P9X8 | ACVAFSNANAAEGKLESIKS | Negative |
| Q0P9X8 | SNANAAEGKLESIKSKGQLI | Negative |
| Q0P9X8 | EGKLESIKSKGQLIVGVKND | Negative |
| Q0P9X8 | KLAVFALGACVAFSNANAAE | Negative |
| Q0P9X8 | GACVAFSNANAAEGKLESIK | Negative |
| Q0P9X8 | NAAEGKLESIKSKGQLIVGV | Negative |
| Q0P9X8 | RKSLLKLAVFALGACVAFSN | Negative |
| Q0P9X8 | LLKLAVFALGACVAFSNANA | Negative |
| Q0P9X8 | VAFSNANAAEGKLESIKSKG | Negative |
| Q0P9X8 | FSNANAAEGKLESIKSKGQL | Negative |
| Q0P9X8 | AAEGKLESIKSKGQLIVGVK | Negative |
| Q0P9X8 | ANAAEGKLESIKSKGQLIVG | Negative |
| Q0P9X8 | AFSNANAAEGKLESIKSKGQ | Negative |
| Q0P9X8 | AEGKLESIKSKGQLIVGVKN | Negative |
| Q0P9X8 | KSLLKLAVFALGACVAFSNA | Negative |
| Q0P9X8 | MVFRKSLLKLAVFALGACVA | Negative |
| Q0P9X8 | NANAAEGKLESIKSKGQLIV | Negative |
| Q0P9X8 | AVFALGACVAFSNANAAEGK | Negative |
| Q0P9X8 | VFRKSLLKLAVFALGACVAF | Negative |
| Q0P9X8 | LGACVAFSNANAAEGKLESI | Negative |
| Q0P9X8 | KLESIKSKGQLIVGVKNDVP | Negative |
| Q0P9X8 | SLLKLAVFALGACVAFSNAN | Negative |
| Q0TV31 | DGKIDGTGTHAMIVTQGVSI | Negative |
| Q0TV31 | KVYAWDGKIDGTGTHAMIVT | Negative |
| Q0TV31 | SLWAGASTKVYAWDGKIDGT | Negative |
| Q0TV31 | RKICKALICAALATSLWAGA | Negative |
| Q0TV31 | KRKICKALICAALATSLWAG | Negative |
| Q0TV31 | ASTKVYAWDGKIDGTGTHAM | Negative |
| Q0TV31 | CKALICAALATSLWAGASTK | Negative |
| Q0TV31 | AWDGKIDGTGTHAMIVTQGV | Negative |
| Q0TV31 | ICAALATSLWAGASTKVYAW | Negative |
| Q0TV31 | TKVYAWDGKIDGTGTHAMIV | Negative |
| Q0TV31 | STKVYAWDGKIDGTGTHAMI | Negative |
| Q0TV31 | YAWDGKIDGTGTHAMIVTQG | Negative |
| Q0TV31 | GASTKVYAWDGKIDGTGTHA | Negative |
| Q0TV31 | WAGASTKVYAWDGKIDGTGT | Negative |
| Q0TV31 | MKRKICKALICAALATSLWA | Negative |
| Q0TV31 | ICKALICAALATSLWAGAST | Negative |
| Q0TV31 | VYAWDGKIDGTGTHAMIVTQ | Negative |

|        |                      |          |
|--------|----------------------|----------|
| Q0TV31 | AALATSLWAGASTKVYAWDG | Negative |
| Q0TV31 | AGASTKVYAWDGKIDGTGTH | Negative |
| Q0TV31 | ATSLWAGASTKVYAWDGKID | Negative |
| Q0TV31 | CAALATSLWAGASTKVYAWD | Negative |
| Q0TV31 | ALICAALATSLWAGASTKVY | Negative |
| Q0TV31 | KICKALICAALATSLWAGAS | Negative |
| Q0TV31 | ALATSLWAGASTKVYAWDGK | Negative |
| Q0TV31 | LICAALATSLWAGASTKVYA | Negative |
| Q0TV31 | WDGKIDGTGTHAMIVTQGV  | Negative |
| Q0TV31 | KALICAALATSLWAGASTKV | Negative |
| Q0TV31 | TSLWAGASTKVYAWDGKIDG | Negative |
| Q0TV31 | LWAGASTKVYAWDGKIDGTG | Negative |
| Q0Z8B6 | KKVLKHCVILGILGTCLAGI | Negative |
| Q0Z8B6 | IGTGIVKDAATYYGNGLYCN | Negative |
| Q0Z8B6 | LAGIGTGIVKDAATYYGNGL | Negative |
| Q0Z8B6 | GILGTCLAGIGTGIVKDAAT | Negative |
| Q0Z8B6 | VLKHCVILGILGTCLAGIGT | Negative |
| Q0Z8B6 | TCLAGIGTGIVKDAATYYGN | Negative |
| Q0Z8B6 | GTGIVKDAATYYGNGLYCNK | Negative |
| Q0Z8B6 | DAATYYGNGLYCNKEKCWVD | Negative |
| Q0Z8B6 | ILGILGTCLAGIGTGIVKDA | Negative |
| Q0Z8B6 | TGIVKDAATYYGNGLYCNKE | Negative |
| Q0Z8B6 | LGTCLAGIGTGIVKDAATYY | Negative |
| Q0Z8B6 | AATYYGNGLYCNKEKCWVDW | Negative |
| Q0Z8B6 | HCVILGILGTCLAGIGTGIV | Negative |
| Q0Z8B6 | MKKKVLKHCVILGILGTCLA | Negative |
| Q0Z8B6 | AGIGTGIVKDAATYYGNGLY | Negative |
| Q0Z8B6 | KKKVLKHCVILGILGTCLAG | Negative |
| Q0Z8B6 | LGILGTCLAGIGTGIVKDAA | Negative |
| Q0Z8B6 | ILGTCLAGIGTGIVKDAATY | Negative |
| Q0Z8B6 | LKHCVILGILGTCLAGIGTG | Negative |
| Q0Z8B6 | VILGILGTCLAGIGTGIVKD | Negative |
| Q0Z8B6 | CLAGIGTGIVKDAATYYGN  | Negative |
| Q0Z8B6 | KVLKHCVILGILGTCLAGIG | Negative |
| Q0Z8B6 | CVILGILGTCLAGIGTGIVK | Negative |
| Q0Z8B6 | KHCVILGILGTCLAGIGTGI | Negative |
| Q0Z8B6 | GIVKDAATYYGNGLYCNKEK | Negative |
| Q0Z8B6 | VDAATYYGNGLYCNKEKCWV | Negative |
| Q0Z8B6 | KVDAATYYGNGLYCNKEKCW | Negative |
| Q0Z8B6 | IKVDAATYYGNGLYCNKEKC | Negative |
| Q0Z8B6 | GIGTGIVKDAATYYGNGLYC | Negative |
| Q10746 | LLLLMATSHQPSGTVVAREL | Negative |
| Q10746 | AALLLLLLMATSHQPSGTV  | Negative |
| Q10746 | TRRLNAALLLLLLMATSH   | Negative |
| Q10746 | VVARELRCQCLKTLPRVDFE | Negative |
| Q10746 | TVVARELRCQCLKTLPRVDF | Negative |

|        |                       |          |
|--------|-----------------------|----------|
| Q10746 | APPTRLLNAALLLLLLLMA   | Negative |
| Q10746 | ATSHQPSGTVVARELRCQCL  | Negative |
| Q10746 | SGTVVARELRCQCLKTLPRV  | Negative |
| Q10746 | LLLLLLMATSHQPSGTVVA   | Negative |
| Q10746 | PTRRLNAALLLLLLLMATS   | Negative |
| Q10746 | MATSHQPSGTVVARELRCQC  | Negative |
| Q10746 | ALLLLLLMATSHQPSGTVV   | Negative |
| Q10746 | LLNAALLLLLLLMATSHQPS  | Negative |
| Q10746 | PSGTVVARELRCQCLKTLPR  | Negative |
| Q10746 | NAALLLLLLLMATSHQPSGT  | Negative |
| Q10746 | PPTRRLNAALLLLLLLMAT   | Negative |
| Q10746 | MAPPTRRLNAALLLLLLLM   | Negative |
| Q10746 | LLLLLLMATSHQPSGTVVAR  | Negative |
| Q10746 | LLMATSHQPSGTVVARELR   | Negative |
| Q10746 | RRLNAALLLLLLLMATSHQ   | Negative |
| Q10746 | GTVVARELRCQCLKTLPRVD  | Negative |
| Q10746 | HQPSGTVVARELRCQCLKTL  | Negative |
| Q10746 | LNAALLLLLLLMATSHQPSG  | Negative |
| Q10746 | SHQPSGTVVARELRCQCLKT  | Negative |
| Q10746 | QPSGTVVARELRCQCLKTLP  | Negative |
| Q10746 | LMATSHQPSGTVVARELRCQ  | Negative |
| Q10746 | RLLNAALLLLLLLMATSHQP  | Negative |
| Q10746 | LLLLMATSHQPSGTVVARE   | Negative |
| Q10746 | TSHQPSGTVVARELRCQCLK  | Negative |
| Q10E50 | RLRAGVVVAAAAAALLFAV   | Negative |
| Q10E50 | LRLRAGVVVAAAAAALLFA   | Negative |
| Q10E50 | LLLFAVVAPPAAALNIGLQS  | Negative |
| Q10E50 | SFSRLRLRAGVVVAAAAAAL  | Negative |
| Q10E50 | AALLLFAVVAPPAAALNIGL  | Negative |
| Q10E50 | FSRLRLRAGVVVAAAAAALL  | Negative |
| Q10E50 | ARGGSFSRLRLRAGVVVAAA  | Negative |
| Q10E50 | RAGVVVAAAAAALLLFAVVA  | Negative |
| Q10E50 | VAAAAAALLLFAVVAPPAAA  | Negative |
| Q10E50 | LLFAVVAPPAAALNIGLQSA  | Negative |
| Q10E50 | RGGFSFSRLRLRAGVVVAAAA | Negative |
| Q10E50 | AGVVVAAAAAALLLFAVVAP  | Negative |
| Q10E50 | AAALLLFAVVAPPAAALNIG  | Negative |
| Q10E50 | VVVAAAAAALLLFAVVAPPA  | Negative |
| Q10E50 | RLRLRAGVVVAAAAAALLLF  | Negative |
| Q10E50 | VVAAAAAALLLFAVVAPPAA  | Negative |
| Q10E50 | SRLRLRAGVVVAAAAAALLL  | Negative |
| Q10E50 | GVVVAAAAAALLLFAVVAPP  | Negative |
| Q10E50 | AAAALLLFAVVAPPAAALNI  | Negative |
| Q10E50 | GGFSFSRLRLRAGVVVAAAA  | Negative |
| Q10E50 | LRAGVVVAAAAAALLLFAVV  | Negative |
| Q10E50 | LFAVVAPPAAALNIGLQSAG  | Negative |

|        |                        |          |
|--------|------------------------|----------|
| Q10E50 | AAAAAALLLFAVVAPPAAAL   | Negative |
| Q10E50 | AAAAAALLLFAVVAPPAAALN  | Negative |
| Q10E50 | ALLLFAVVAPPAAALNIGLQ   | Negative |
| Q10E50 | MARGGSFSRLRLRAGVVVAA   | Negative |
| Q10E50 | VVAPPAAALNIGLQSAGDGA   | Negative |
| Q10E50 | GSFSRLRLRAGVVVAAAAAA   | Negative |
| Q10E50 | FAVVAPPAAALNIGLQSAGD   | Negative |
| Q10NX8 | RLLLLPVVVVVVSLLVGASRA  | Negative |
| Q10NX8 | ATVGVLLRLLLLPVVVVVSL   | Negative |
| Q10NX8 | SRAANVTYDHRAVVIDGVRR   | Negative |
| Q10NX8 | AAATVGVLLRLLLLPVVVVV   | Negative |
| Q10NX8 | VVVVSLLVGASRAANVTYDH   | Negative |
| Q10NX8 | GASRAANVTYDHRAVVIDGV   | Negative |
| Q10NX8 | SLLVGASRAANVTYDHRAVV   | Negative |
| Q10NX8 | LLLPVVVVVSLLVGASRAAN   | Negative |
| Q10NX8 | VVSLLVGASRAANVTYDHRA   | Negative |
| Q10NX8 | VSLLVGASRAANVTYDHRAV   | Negative |
| Q10NX8 | VGASRAANVTYDHRAVVIDG   | Negative |
| Q10NX8 | LPVVVVVSLLVGASRAANVT   | Negative |
| Q10NX8 | TVGVLLRLLLLPVVVVVSL    | Negative |
| Q10NX8 | RAANVTYDHRAVVIDGVRRV   | Negative |
| Q10NX8 | MAAATVGVLLRLLLLPVVVV   | Negative |
| Q10NX8 | VVVVVVSLLVGASRAANVTYD  | Negative |
| Q10NX8 | LVGASRAANVTYDHRAVVID   | Negative |
| Q10NX8 | LLRLLLLPVVVVVVSLLVGAS  | Negative |
| Q10NX8 | LLPVVVVVVSLLVGASRAANV  | Negative |
| Q10NX8 | VGVLLRLLLLPVVVVVVSLLV  | Negative |
| Q10NX8 | VVSLLVGASRAANVTYDHR    | Negative |
| Q10NX8 | GVLLRLLLLPVVVVVVSLLVG  | Negative |
| Q10NX8 | VLLRLLLLPVVVVVVSLLVGA  | Negative |
| Q10NX8 | LLVGASRAANVTYDHRAVVI   | Negative |
| Q10NX8 | AATVGVLLRLLLLPVVVVVVS  | Negative |
| Q10NX8 | AANVTYDHRAVVIDGVRRVL   | Negative |
| Q10NX8 | LLLLPVVVVVVSLLVGASRAA  | Negative |
| Q10NX8 | LRLLLLLPVVVVVVSLLVGASR | Negative |
| Q10NX8 | ASRAANVTYDHRAVVIDGVR   | Negative |
| Q10ST8 | AVLVLAVAMVAACGGGVVGV   | Negative |
| Q10ST8 | CGGGVVG VAGAGCNAGQLTV  | Negative |
| Q10ST8 | AGAGCNAGQLTVCTGAIAGG   | Negative |
| Q10ST8 | GVAGAGCNAGQLTVCTGAIA   | Negative |
| Q10ST8 | GGVVGVAGAGCNAGQLTVCT   | Negative |
| Q10ST8 | LAVLVLAVAMVAACGGGVVG   | Negative |
| Q10ST8 | MRKLAVLVLAVAMVAACGGG   | Negative |
| Q10ST8 | VAGAGCNAGQLTVCTGAIAG   | Negative |
| Q10ST8 | VVG VAGAGCNAGQLTVCTGA  | Negative |
| Q10ST8 | GGGVVG VAGAGCNAGQLTVC  | Negative |

|        |                       |          |
|--------|-----------------------|----------|
| Q10ST8 | CNAGQLTVCTGAIAGGARPT  | Negative |
| Q10ST8 | VAACGGGVVGVAGAGCNAGQ  | Negative |
| Q10ST8 | VLVLAVAMVAACGGGVVGVA  | Negative |
| Q10ST8 | GCNAGQLTVCTGAIAGGARP  | Negative |
| Q10ST8 | ACGGGVVGVAGAGCNAGQLT  | Negative |
| Q10ST8 | LVAVAMVAACGGGVVGAG    | Negative |
| Q10ST8 | LAVAMVAACGGGVVGAGAG   | Negative |
| Q10ST8 | KLAVLVLAVAMVAACGGGVV  | Negative |
| Q10ST8 | RKLAVLVLAVAMVAACGGGV  | Negative |
| Q10ST8 | AGCNAGQLTVCTGAIAGGAR  | Negative |
| Q10ST8 | AACGGGVVGVAGAGCNAGQL  | Negative |
| Q10ST8 | MMRKLAVLVLAVAMVAACGG  | Negative |
| Q10ST8 | MVAACGGGVVGVAGAGCNAG  | Negative |
| Q10ST8 | VLAVAMVAACGGGVVGAGAG  | Negative |
| Q10ST8 | GVVGAGAGCNAGQLTVCTG   | Negative |
| Q10ST8 | AVAMVAACGGGVVGAGAGC   | Negative |
| Q10ST8 | VAMVAACGGGVVGAGAGCN   | Negative |
| Q10ST8 | VGAGAGCNAGQLTVCTGAI   | Negative |
| Q10ST8 | GAGCNAGQLTVCTGAIAGGA  | Negative |
| Q12127 | VSQESTTLVTITSCEDHVCS  | Negative |
| Q12127 | QFSTVASIAA VAAVASAAAN | Negative |
| Q12127 | MQFSTVASIAA VAAVASAAA | Negative |
| Q12127 | NVTTATVSQESTTLVTITSC  | Negative |
| Q12127 | AANVTATVSQESTTLVTIT   | Negative |
| Q12127 | AVASAAANVTATVSQESTT   | Negative |
| Q12127 | AAVASAAANVTATVSQE     | Negative |
| Q12127 | TTATVSQESTTLVTITSCED  | Negative |
| Q12127 | AAVASAAANVTATVSQ      | Negative |
| Q12127 | IAAVAAVASAAANVTATVS   | Negative |
| Q12127 | QESTTLVTITSCEDHVCSET  | Negative |
| Q12127 | ASAAANVTATVSQESTTLV   | Negative |
| Q12127 | TVSQUESTTLVTITSCEDHVC | Negative |
| Q12127 | VTTATVSQUESTTLVTITSCE | Negative |
| Q12127 | SQUESTTLVTITSCEDHVCSE | Negative |
| Q12127 | ATVSQUESTTLVTITSCEDHV | Negative |
| Q12127 | SIAAVAAVASAAANVTATV   | Negative |
| Q12127 | TATVSQUESTTLVTITSCEDH | Negative |
| Q12127 | ASIAAVAAVASAAANVTAT   | Negative |
| Q12127 | SAAANVTATVSQUESTTLVT  | Negative |
| Q12127 | AAANVTATVSQUESTTLVTI  | Negative |
| Q12127 | AAVASAAANVTATVSQUEST  | Negative |
| Q12127 | TVASIAAVAAVASAAANVT   | Negative |
| Q12127 | ANVTATVSQUESTTLVTITS  | Negative |
| Q12127 | ESTTLVTITSCEDHVCSETV  | Negative |
| Q12127 | VASIAAVAAVASAAANVT    | Negative |
| Q12127 | VASAAANVTATVSQUESTTL  | Negative |



|        |                      |          |
|--------|----------------------|----------|
| Q12127 | FSTVASIAAVAAVASAAANV | Negative |
| Q12127 | VAAVASAAANVTATVSQES  | Negative |
| Q12546 | LLVALSATAAQARPVVDERF | Negative |
| Q12546 | AAQARPVVDERFPYTGPVP  | Negative |
| Q12546 | FPYTGPVPIGDWVDPTING  | Negative |
| Q12546 | AQARPVVDERFPYTGPVPI  | Negative |
| Q12546 | TAASALLVALSATAAQARPV | Negative |
| Q12546 | SATAAQARPVVDERFPYTGP | Negative |
| Q12546 | MKGTAASALLVALSATAAQA | Negative |
| Q12546 | ARPVVDERFPYTGPVPIGD  | Negative |
| Q12546 | PYTGPVPIGDWVDPTINGN  | Negative |
| Q12546 | VDERFPYTGPVPIGDWVDP  | Negative |
| Q12546 | KGTAASALLVALSATAAQAR | Negative |
| Q12546 | ERFPYTGPVPIGDWVDPTI  | Negative |
| Q12546 | LVALSATAAQARPVVDERFP | Negative |
| Q12546 | ASALLVALSATAAQARPVVD | Negative |
| Q12546 | PVVDERFPYTGPVPIGDWV  | Negative |
| Q12546 | GTAASALLVALSATAAQARP | Negative |
| Q12546 | ALSATAAQARPVVDERFPYT | Negative |
| Q12546 | VVDERFPYTGPVPIGDWVD  | Negative |
| Q12546 | LSATAAQARPVVDERFPYTG | Negative |
| Q12546 | YTGPVPIGDWVDPTINGNG  | Negative |
| Q12546 | DERFPYTGPVPIGDWVDPT  | Negative |
| Q12546 | QARPVVDERFPYTGPVPIG  | Negative |
| Q12546 | VALSATAAQARPVVDERFPY | Negative |
| Q12546 | AASALLVALSATAAQARPVV | Negative |
| Q12546 | RFPYTGPVPIGDWVDPTIN  | Negative |
| Q12546 | RPVVDERFPYTGPVPIGDW  | Negative |
| Q12546 | SALLVALSATAAQARPVVDE | Negative |
| Q12546 | TAAQARPVVDERFPYTGPV  | Negative |
| Q12546 | ATAAQARPVVDERFPYTGPA | Negative |
| Q12841 | AEEELRSKSKICANVFCGAG | Negative |
| Q12841 | RSKSKICANVFCGAGRECAV | Negative |
| Q12841 | ELRSKSKICANVFCGAGREC | Negative |
| Q12841 | VAWVRAEEELRSKSKICANV | Negative |
| Q12841 | RWLALALALVAVAWVRAEEE | Negative |
| Q12841 | EEELRSKSKICANVFCGAGR | Negative |
| Q12841 | VAVAWVRAEEELRSKSKICA | Negative |
| Q12841 | AWVRAEEELRSKSKICANVF | Negative |
| Q12841 | LALALVAVAWVRAEEELRSK | Negative |
| Q12841 | WVRAEEELRSKSKICANVFC | Negative |
| Q12841 | ICANVFCGAGRECAVTEKGE | Negative |
| Q12841 | VRAEEELRSKSKICANVFCG | Negative |
| Q12841 | ALALALVAVAWVRAEEELRS | Negative |
| Q12841 | KICANVFCGAGRECAVTEKG | Negative |
| Q12841 | KSKICANVFCGAGRECAVTE | Negative |

|        |                      |          |
|--------|----------------------|----------|
| Q12841 | AVAWVRAEEELRSKSKICAN | Negative |
| Q12841 | KRWLALALALVAVAWVRAEE | Negative |
| Q12841 | WKRWLALALALVAVAWVRAE | Negative |
| Q12841 | RAEEELRSKSKICANVFCGA | Negative |
| Q12841 | ALVAVAWVRAEEELRSKSKI | Negative |
| Q12841 | ALALVAVAWVRAEEELRSKS | Negative |
| Q12841 | MWKRWLALALALVAVAWVRA | Negative |
| Q12841 | WLALALALVAVAWVRAEEEL | Negative |
| Q12841 | LVAVAWVRAEEELRSKSKIC | Negative |
| Q12841 | SKICANVFCGAGRECAVTEK | Negative |
| Q12841 | LRSKSKICANVFCGAGRECA | Negative |
| Q12841 | LALVAVAWVRAEEELRSKSK | Negative |
| Q12841 | EELRSKSKICANVFCGAGRE | Negative |
| Q12841 | SKSKICANVFCGAGRECAVT | Negative |
| Q13007 | RPFCPPLLATASQMVMVLP  | Negative |
| Q13007 | PFCPPLLATASQMVMVLPCL | Negative |
| Q13007 | PLLATASQMVMVLPCLGFT  | Negative |
| Q13007 | ARPCPPLLATASQMVMVLP  | Negative |
| Q13007 | CPPLLATASQMVMVLPCLG  | Negative |
| Q13007 | NFQQRLQSLWTLARPCPPL  | Negative |
| Q13007 | QMVMVLPCLGFTLLLWSQV  | Negative |
| Q13007 | FQQRLQSLWTLARPCPPLL  | Negative |
| Q13007 | LLATASQMVMVLPCLGFTL  | Negative |
| Q13007 | MNFQQRLQSLWTLARPCPP  | Negative |
| Q13007 | FCPPLLATASQMVMVLPCL  | Negative |
| Q13007 | RLQSLWTLARPCPPLLATA  | Negative |
| Q13007 | PPLLATASQMVMVLPCLGF  | Negative |
| Q13007 | QMVLPCLGFTLLLWSQVSG  | Negative |
| Q13007 | SLWTLARPCPPLLATASQM  | Negative |
| Q13007 | TLARPCPPLLATASQMVM   | Negative |
| Q13007 | QQRLQSLWTLARPCPPLLA  | Negative |
| Q13007 | WTLARPCPPLLATASQM    | Negative |
| Q13007 | ATASQMVMVLPCLGFTLLL  | Negative |
| Q13007 | LATASQMVMVLPCLGFTLL  | Negative |
| Q13007 | MVVLPCLGFTLLLWSQVSGA | Negative |
| Q13007 | ASQMVMVLPCLGFTLLLWS  | Negative |
| Q13007 | TASQMVMVLPCLGFTLLLW  | Negative |
| Q13007 | LQSLWTLARPCPPLLATAS  | Negative |
| Q13007 | QRLQSLWTLARPCPPLLAT  | Negative |
| Q13007 | LWTLARPCPPLLATASQMQ  | Negative |
| Q13007 | MQMVLPCLGFTLLLWSQVS  | Negative |
| Q13007 | QSLWTLARPCPPLLATASQ  | Negative |
| Q13007 | LARPCPPLLATASQMVMV   | Negative |
| Q13007 | SQMVMVLPCLGFTLLLWSQ  | Negative |
| Q13162 | ATTPDHGRHRLLLLPLLLF  | Negative |
| Q13162 | MEALPLLAATTPDHGRHRRL | Negative |

|        |                      |          |
|--------|----------------------|----------|
| Q13162 | ALPLLAATTPDHGRHRLLLL | Negative |
| Q13162 | LLAATTPDHGRHRLLLLPL  | Negative |
| Q13162 | GRHRLLLLPLLLFLLPAGA  | Negative |
| Q13162 | LPLLAATTPDHGRHRLLLL  | Negative |
| Q13162 | FLLPAGAVQGWETEERPRTR | Negative |
| Q13162 | RRLLLLPLLLFLLPAGAVQG | Negative |
| Q13162 | HRLLLLPLLLFLLPAGAVQ  | Negative |
| Q13162 | LLPAGAVQGWETEERPRTRE | Negative |
| Q13162 | HGRHRLLLLPLLLFLLPAG  | Negative |
| Q13162 | RHRLLLLPLLLFLLPAGAV  | Negative |
| Q13162 | LPAGAVQGWETEERPRTREE | Negative |
| Q13162 | PLLAATTPDHGRHRLLLLP  | Negative |
| Q13162 | RLLLLPLLLFLLPAGAVQGW | Negative |
| Q13162 | LFLLPAGAVQGWETEERPR  | Negative |
| Q13162 | LLLPLLLFLLPAGAVQGWE  | Negative |
| Q13162 | DHGRHRLLLLPLLLFLLPA  | Negative |
| Q13162 | PLLLFLLPAGAVQGWETEER | Negative |
| Q13162 | LLLPLLLFLLPAGAVQGWET | Negative |
| Q13162 | LLPLLLFLLPAGAVQGWETE | Negative |
| Q13162 | LLFLLPAGAVQGWETEERPR | Negative |
| Q13162 | PDHGRHRLLLLPLLLFLLP  | Negative |
| Q13162 | AATTPDHGRHRLLLLPLLL  | Negative |
| Q13162 | LAATTPDHGRHRLLLLPLL  | Negative |
| Q13162 | EALPLLAATTPDHGRHRLL  | Negative |
| Q13162 | TTPDHGRHRLLLLPLLLFL  | Negative |
| Q13162 | TPDHGRHRLLLLPLLLFLL  | Negative |
| Q13162 | LLLFLLPAGAVQGWETEERP | Negative |
| Q13231 | AGFMVLLMIPWGSAAKLVCY | Negative |
| Q13231 | CYFTNWAQYRQGEARFLPKD | Negative |
| Q13231 | SAAKLVCYFTNWAQYRQGEA | Negative |
| Q13231 | GFMVLLMIPWGSAAKLVCYF | Negative |
| Q13231 | VRSAWAGFMVLLMIPWGSA  | Negative |
| Q13231 | NWAQYRQGEARFLPKDLDP  | Negative |
| Q13231 | VLLMIPWGSAAKLVCYFTNW | Negative |
| Q13231 | PWGSAAKLVCYFTNWAQYRQ | Negative |
| Q13231 | MVLLMIPWGSAAKLVCYFTN | Negative |
| Q13231 | LLMIPWGSAAKLVCYFTNWA | Negative |
| Q13231 | RSVAWAGFMVLLMIPWGSA  | Negative |
| Q13231 | VAWAGFMVLLMIPWGSAAKL | Negative |
| Q13231 | IPWGSAAKLVCYFTNWAQYR | Negative |
| Q13231 | AKLVCYFTNWAQYRQGEARF | Negative |
| Q13231 | LMIPWGSAAKLVCYFTNWAQ | Negative |
| Q13231 | VCYFTNWAQYRQGEARFLPK | Negative |
| Q13231 | SVAWAGFMVLLMIPWGSAAK | Negative |
| Q13231 | GSAAKLVCYFTNWAQYRQGE | Negative |
| Q13231 | TNWAQYRQGEARFLPKDLP  | Negative |

|        |                        |          |
|--------|------------------------|----------|
| Q13231 | MIPWGSAAKLVCYFTNWAQY   | Negative |
| Q13231 | MVRSVAWAGFMVLLMIPWGS   | Negative |
| Q13231 | FTNWAQYRQGEGEARFLPKDLD | Negative |
| Q13231 | AAKLVCYFTNWAQYRQGEAR   | Negative |
| Q13231 | LVCYFTNWAQYRQGEARFLP   | Negative |
| Q13231 | WGSAAKLVCYFTNWAQYRQG   | Negative |
| Q13231 | FMVLLMIPWGSAAKLVCYFT   | Negative |
| Q13231 | KLVCYFTNWAQYRQGEARFL   | Negative |
| Q13231 | AWAGFMVLLMIPWGSAAKL    | Negative |
| Q13231 | YFTNWAQYRQGEARFLPKDL   | Negative |
| Q13421 | TARPLLGSCTPALGSLLFL    | Negative |
| Q13421 | GWVQPSRTLGETGQEAAPL    | Negative |
| Q13421 | ARPLLGSCTPALGSLLFLL    | Negative |
| Q13421 | PLLGSCTPALGSLLFLLFS    | Negative |
| Q13421 | SCCTPALGSLLFLLFSLGWV   | Negative |
| Q13421 | GSCTPALGSLLFLLFSLGW    | Negative |
| Q13421 | PTARPLLGSCTPALGSLLF    | Negative |
| Q13421 | SLGWVQPSRTLGETGQEA     | Negative |
| Q13421 | MALPTARPLLGSCTPALGS    | Negative |
| Q13421 | PALGSLLFLLFSLGWVQPSR   | Negative |
| Q13421 | LGWVQPSRTLGETGQEAAP    | Negative |
| Q13421 | LLGSCTPALGSLLFLLFSL    | Negative |
| Q13421 | SLLFLLFSLGWVQPSRTLAG   | Negative |
| Q13421 | LGSCCTPALGSLLFLLFSLG   | Negative |
| Q13421 | WVQPSRTLGETGQEAAPLD    | Negative |
| Q13421 | GTPALGSLLFLLFSLGWVQP   | Negative |
| Q13421 | FLLFSLGWVQPSRTLAGETG   | Negative |
| Q13421 | FSLGWVQPSRTLAGETGQEA   | Negative |
| Q13421 | ALPTARPLLGSCTPALGSL    | Negative |
| Q13421 | GSLFLLFSLGWVQPSRTLA    | Negative |
| Q13421 | TPALGSLLFLLFSLGWVQPS   | Negative |
| Q13421 | CGTPALGSLLFLLFSLGWVQ   | Negative |
| Q13421 | RPLLGSCTPALGSLLFLLF    | Negative |
| Q13421 | LLFSLGWVQPSRTLAGETGQ   | Negative |
| Q13421 | LPTARPLLGSCTPALGSLL    | Negative |
| Q13421 | LFSLGWVQPSRTLAGETGQE   | Negative |
| Q13421 | LGSLFLLFSLGWVQPSRTL    | Negative |
| Q13421 | ALGSLLFLLFSLGWVQPSRT   | Negative |
| Q13421 | LLFLLFSLGWVQPSRTLAGE   | Negative |
| Q14002 | SPSACPVRVCIPWQGLLLTA   | Negative |
| Q14002 | ACPVRVCIPWQGLLLTASLL   | Negative |
| Q14002 | LPNSAQTNIDVVPFNVAEGK   | Negative |
| Q14002 | GSPSACPVRVCIPWQGLLLT   | Negative |
| Q14002 | GLLLTASLLTFWNLPSAQTN   | Negative |
| Q14002 | TFWNLPSAQTNIDVVPFNV    | Negative |
| Q14002 | MGSPSACPVRVCIPWQGLLL   | Negative |

|        |                        |          |
|--------|------------------------|----------|
| Q14002 | PWQGLLLTASLLTFWNL PNS  | Negative |
| Q14002 | IPWQGLLLTASLLTFWNL PN  | Negative |
| Q14002 | LLLTASLLTFWNL PNSAQTN  | Negative |
| Q14002 | YRVCIPWQGLLLTASLLTFW   | Negative |
| Q14002 | PSACPYRVCIPWQGLLLTAS   | Negative |
| Q14002 | ASLLTFWNL PNSAQTNIDVV  | Negative |
| Q14002 | CPYRVCIPWQGLLLTASLLT   | Negative |
| Q14002 | LLTFWNL PNSAQTNIDVVPF  | Negative |
| Q14002 | PYRVCIPWQGLLLTASLLTF   | Negative |
| Q14002 | VCIPWQGLLLTASLLTFWNL   | Negative |
| Q14002 | SACPYRVCIPWQGLLLTASL   | Negative |
| Q14002 | LLTASLLTFWNL PNSAQTN I | Negative |
| Q14002 | NL PNSAQTNIDVVPFNVAEG  | Negative |
| Q14002 | LTFWNL PNSAQTNIDVVPFN  | Negative |
| Q14002 | WNL PNSAQTNIDVVPFNVAE  | Negative |
| Q14002 | SLLTFWNL PNSAQTNIDVVP  | Negative |
| Q14002 | WQGLLLTASLLTFWNL PNSA  | Negative |
| Q14002 | QGLLLTASLLTFWNL PNSAQ  | Negative |
| Q14002 | CIPWQGLLLTASLLTFWNL P  | Negative |
| Q14002 | RVCIPWQGLLLTASLLTFWN   | Negative |
| Q14002 | LTASLLTFWNL PNSAQTNID  | Negative |
| Q14002 | FWNL PNSAQTNIDVVPFNVA  | Negative |
| Q14112 | PVLSSLPVLLLLPLLMLRAA   | Negative |
| Q14112 | RPVLSSLPVLLLLPLLMLRA   | Negative |
| Q14112 | AALHPDELFPHGESWGDQLL   | Negative |
| Q14112 | LRAAALHPDELFPHGESWGD   | Negative |
| Q14112 | GRPVLSSLPVLLLLPLLMLR   | Negative |
| Q14112 | VLLLLPLLMLRAAALHPDEL   | Negative |
| Q14112 | LPLLMLRAAALHPDELFPHG   | Negative |
| Q14112 | VLSSLPVLLLLPLLMLRAAA   | Negative |
| Q14112 | GDRVAGRPLVSSLPVLLLLP   | Negative |
| Q14112 | DRVAGRPLVSSLPVLLLLPL   | Negative |
| Q14112 | EGDRVAGRPLVSSLPVLLLL   | Negative |
| Q14112 | MEGDRVAGRPLVSSLPVLLL   | Negative |
| Q14112 | LMLRAAALHPDELFPHGESW   | Negative |
| Q14112 | LPVLLLLPLLMLRAAALHPD   | Negative |
| Q14112 | RAAALHPDELFPHGESWGDQ   | Negative |
| Q14112 | ALHPDELFPHGESWGDQLLQ   | Negative |
| Q14112 | PLLMLRAAALHPDELFPHGE   | Negative |
| Q14112 | AGRPVLSSLPVLLLLPLLML   | Negative |
| Q14112 | AAALHPDELFPHGESWGDQL   | Negative |
| Q14112 | RVAGRPLVSSLPVLLLLPLL   | Negative |
| Q14112 | LLMLRAAALHPDELFPHGES   | Negative |
| Q14112 | LLLPLLMLRAAALHPDELFP   | Negative |
| Q14112 | SSLPVLLLLPLLMLRAAALH   | Negative |
| Q14112 | MLRAAALHPDELFPHGESWG   | Negative |

|        |                      |          |
|--------|----------------------|----------|
| Q14112 | LLLLPLLMLRAAALHPDELF | Negative |
| Q14112 | SLPVLLLLPLLMLRAAALHP | Negative |
| Q14112 | LLPLLMLRAAALHPDELFPH | Negative |
| Q14112 | VAGRPVLSSLPVLLLLPLLM | Negative |
| Q14112 | LSSLPVLLLLPLLMLRAAAL | Negative |
| Q14210 | TLRCHVCTSSSNCKHSVVC  | Negative |
| Q14210 | HVCTSSSNCKHSVVC      | Negative |
| Q14210 | RTALLLLAALAVATGPALTL | Negative |
| Q14210 | VATGPALTLRCHVCTSSSN  | Negative |
| Q14210 | TGPALTLRCHVCTSSSNCKH | Negative |
| Q14210 | AVATGPALTLRCHVCTSSSN | Negative |
| Q14210 | LAALAVATGPALTLRCHVCT | Negative |
| Q14210 | TSSSNCKHSVVC         | Negative |
| Q14210 | SSNCKHSVVC           | Negative |
| Q14210 | SNCKHSVVC            | Negative |
| Q14210 | LLAALAVATGPALTLRCHVC | Negative |
| Q14210 | PALTLRCHVCTSSSNCKHSV | Negative |
| Q14210 | MRTALLLLAALAVATGPALT | Negative |
| Q14210 | ATGPALTLRCHVCTSSSNCK | Negative |
| Q14210 | LLLLAALAVATGPALTLRCH | Negative |
| Q14210 | ALLLLAALAVATGPALTLRC | Negative |
| Q14210 | LTLRCHVCTSSSNCKHSVVC | Negative |
| Q14210 | TALLLLAALAVATGPALTLR | Negative |
| Q14210 | VCTSSSNCKHSVVC       | Negative |
| Q14210 | CTSSSNCKHSVVC        | Negative |
| Q14210 | LRCHVCTSSSNCKHSVVC   | Negative |
| Q14210 | ALAVATGPALTLRCHVCTSS | Negative |
| Q14210 | GPALTLRCHVCTSSSNCKHS | Negative |
| Q14210 | SSSNCKHSVVC          | Negative |
| Q14210 | CHVCTSSSNCKHSVVC     | Negative |
| Q14210 | ALTLRCHVCTSSSNCKHSV  | Negative |
| Q14210 | AALAVATGPALTLRCHVCTS | Negative |
| Q14210 | RCHVCTSSSNCKHSVVC    | Negative |
| Q14210 | LAVATGPALTLRCHVCTSSS | Negative |
| Q14520 | LLESLDPDWTPDQYDYSYED | Negative |
| Q14520 | GKTACGFSLSLLESLDPDW  | Negative |
| Q14520 | LESLDPDWTPDQYDYSYEDY | Negative |
| Q14520 | MALVGKTACGFSLSLLESL  | Negative |
| Q14520 | TACGFSLSLLESLDPDWTP  | Negative |
| Q14520 | VLLLMALVGKTACGFSLSL  | Negative |
| Q14520 | LVGKTACGFSLSLLESLDP  | Negative |
| Q14520 | CGFSLSLLESLDPDWTPDQ  | Negative |
| Q14520 | LMSLLESLDPDWTPDQYDYS | Negative |
| Q14520 | LLLMALVGKTACGFSLSL   | Negative |
| Q14520 | ALVGKTACGFSLSLLESLD  | Negative |
| Q14520 | MSDLHVLLLMALVGKTACGF | Negative |

|        |                        |          |
|--------|------------------------|----------|
| Q14520 | GFSLSMSLLESLDAPDWTPDQY | Negative |
| Q14520 | SDLHVLLLMALVGKTACGFS   | Negative |
| Q14520 | SLMSLLESLDAPDWTPDQYDY  | Negative |
| Q14520 | FARMSDLHVLLLMALVGKTA   | Negative |
| Q14520 | SLLESLDAPDWTPDQYDYSYE  | Negative |
| Q14520 | FSLMSLLESLDAPDWTPDQYD  | Negative |
| Q14520 | RMSDLHVLLLMALVGKTACG   | Negative |
| Q14520 | LLMALVGKTACGFSLSMSLLE  | Negative |
| Q14520 | MFARMSDLHVLLLMALVGKT   | Negative |
| Q14520 | LMALVGKTACGFSLSMSLLES  | Negative |
| Q14520 | KTACGFSLSMSLLESLDAPWT  | Negative |
| Q14520 | DLHVLLLMALVGKTACGFSL   | Negative |
| Q14520 | ACGFSLSMSLLESLDAPWTPD  | Negative |
| Q14520 | VGKTACGFSLSMSLLESLDAP  | Negative |
| Q14520 | MSLLESLDAPDWTPDQYDYSY  | Negative |
| Q14520 | ARMSDLHVLLLMALVGKTAC   | Negative |
| Q14520 | LHVLLLMALVGKTACGFSLM   | Negative |
| Q14624 | VLVLLSLLAIHQTTTAEKNG   | Negative |
| Q14624 | RTCSKVLVLLSLLAIHQTTT   | Negative |
| Q14624 | TTAEKNGIDIYSLTVDSRVS   | Negative |
| Q14624 | VLLSLLAIHQTTTAEKNGID   | Negative |
| Q14624 | TAEKNGIDIYSLTVDSRVSS   | Negative |
| Q14624 | MKPPRPVRTCSKVLVLLSLL   | Negative |
| Q14624 | SLLAIHQTTTAEKNGIDIYS   | Negative |
| Q14624 | VRTCSKVLVLLSLLAIHQTT   | Negative |
| Q14624 | LLAIHQTTTAEKNGIDIYSL   | Negative |
| Q14624 | KNGIDIYSLTVDSRVSSRFA   | Negative |
| Q14624 | KVLVLLSLLAIHQTTTAEKN   | Negative |
| Q14624 | LAIHQTTTAEKNGIDIYSLT   | Negative |
| Q14624 | LLSLLAIHQTTTAEKNGIDI   | Negative |
| Q14624 | TTTAEKNGIDIYSLTVDSRV   | Negative |
| Q14624 | PRPVVRTCSKVLVLLSLLAIH  | Negative |
| Q14624 | PPRPVRTCSKVLVLLSLLAI   | Negative |
| Q14624 | CSKVLVLLSLLAIHQTTTAE   | Negative |
| Q14624 | KPPRPVRTCSKVLVLLSLLA   | Negative |
| Q14624 | HQTTTAEKNGIDIYSLTVDS   | Negative |
| Q14624 | EKNGIDIYSLTVDSRVSSRF   | Negative |
| Q14624 | TCSKVLVLLSLLAIHQTTTA   | Negative |
| Q14624 | SKVLVLLSLLAIHQTTTAEK   | Negative |
| Q14624 | RPVRTCSKVLVLLSLLAIHQ   | Negative |
| Q14624 | LSLLAIHQTTTAEKNGIDIY   | Negative |
| Q14624 | QTTTAEKNGIDIYSLTVDSR   | Negative |
| Q14624 | IHQTTTAEKNGIDIYSLTVD   | Negative |
| Q14624 | AIHQTTTAEKNGIDIYSLTV   | Negative |
| Q14624 | AEKNGIDIYSLTVDSRVSSR   | Negative |
| Q14624 | PVRTCSKVLVLLSLLAIHQ    | Negative |

|        |                      |          |
|--------|----------------------|----------|
| Q14641 | MASLFRSYLPAIWLLLSQLL | Negative |
| Q14641 | LSQLLRESLAAELRGCGPRF | Negative |
| Q14641 | ASLFRSYLPAIWLLLSQLLR | Negative |
| Q14641 | RESLAAELRGCGPRFGKHL  | Negative |
| Q14641 | FRSYLPAIWLLLSQLLRESL | Negative |
| Q14641 | SYLPAIWLLLSQLLRESLAA | Negative |
| Q14641 | RSYLPAIWLLLSQLLRESLA | Negative |
| Q14641 | YLPAIWLLLSQLLRESLAAE | Negative |
| Q14641 | IWLLLSQLLRESLAAELRGC | Negative |
| Q14641 | QLLRESLAAELRGCGPRFGK | Negative |
| Q14641 | LAAELRGCGPRFGKHLLSYC | Negative |
| Q14641 | ELRGCGPRFGKHLLSYCPMP | Negative |
| Q14641 | SQLLRESLAAELRGCGPRFG | Negative |
| Q14641 | LRESLAAELRGCGPRFGKHL | Negative |
| Q14641 | WLLLSQLLRESLAAELRGCG | Negative |
| Q14641 | LFRSYLPAIWLLLSQLLRES | Negative |
| Q14641 | AELRGCGPRFGKHLLSYCPM | Negative |
| Q14641 | ESLAAELRGCGPRFGKHLLS | Negative |
| Q14641 | SLAAELRGCGPRFGKHLLSY | Negative |
| Q14641 | AAELRGCGPRFGKHLLSYCP | Negative |
| Q14641 | LLSQLLRESLAAELRGCGPR | Negative |
| Q14641 | RGCGPRFGKHLLSYCPMPEK | Negative |
| Q14641 | LLSQLLRESLAAELRGCGP  | Negative |
| Q14641 | PAIWLLLSQLLRESLAAELR | Negative |
| Q14641 | LRGCGPRFGKHLLSYCPMPE | Negative |
| Q14641 | SLFRSYLPAIWLLLSQLLRE | Negative |
| Q14641 | LPAIWLLLSQLLRESLAAEL | Negative |
| Q14641 | LLRESLAAELRGCGPRFGKH | Negative |
| Q14641 | GCGPRFGKHLLSYCPMPEKT | Negative |
| Q15084 | LGLVSCTFFLAVNGLYSSSD | Negative |
| Q15084 | DVIELTPSNFNREVIQSDSL | Negative |
| Q15084 | AVNGLYSSSDDVIELTPSNF | Negative |
| Q15084 | MALLVLGLVSCTFFLAVNGL | Negative |
| Q15084 | ALLVLGLVSCTFFLAVNGLY | Negative |
| Q15084 | LVLGLVSCTFFLAVNGLYSS | Negative |
| Q15084 | LAVNGLYSSSDDVIELTPSN | Negative |
| Q15084 | TFFLAVNGLYSSSDDVIELT | Negative |
| Q15084 | SDDVIELTPSNFNREVIQSD | Negative |
| Q15084 | GLVSCTFFLAVNGLYSSSD  | Negative |
| Q15084 | LLVLGLVSCTFFLAVNGLYS | Negative |
| Q15084 | ELTPSNFNREVIQSDSLWL  | Negative |
| Q15084 | FFLAVNGLYSSSDDVIELTP | Negative |
| Q15084 | FLAVNGLYSSSDDVIELTPS | Negative |
| Q15084 | LVSCTFFLAVNGLYSSSDDV | Negative |
| Q15084 | GLYSSSDDVIELTPSNFNRE | Negative |
| Q15084 | VSCTFFLAVNGLYSSSDDVI | Negative |



|        |                       |          |
|--------|-----------------------|----------|
| Q15084 | CTFFLA VNGLYSSSDDVIEL | Negative |
| Q15084 | SCTFFLA VNGLYSSSDDVIE | Negative |
| Q15084 | YSSSDDVIELTPSNFNREVI  | Negative |
| Q15084 | SSSDDVIELTPSNFNREVIQ  | Negative |
| Q15084 | VIELTPSNFNREVIQSDSLW  | Negative |
| Q15084 | DDVIELTPSNFNREVIQSDS  | Negative |
| Q15084 | VNGLYSSSDDVIELTPSNFN  | Negative |
| Q15084 | SSDDVIELTPSNFNREVIQS  | Negative |
| Q15084 | LTPSNFNREVIQSDSLWLVE  | Negative |
| Q15084 | IELTPSNFNREVIQSDSLWL  | Negative |
| Q15084 | NGLYSSSDDVIELTPSNFNR  | Negative |
| Q15084 | LYSSSDDVIELTPSNFNREV  | Negative |
| Q15465 | LARCLLLVLVSSLLVCSGLA  | Negative |
| Q15465 | GPGRGFGKRRHPKKLTPLAY  | Negative |
| Q15465 | PGRGFGKRRHPKKLTPLAYK  | Negative |
| Q15465 | LVLVSSLLVCSGLACGPGRG  | Negative |
| Q15465 | CGPGRGFGKRRHPKKLTPLA  | Negative |
| Q15465 | VCSGLACGPGRGFGKRRHPK  | Negative |
| Q15465 | RGFGKRRHPKKLTPLAYKQF  | Negative |
| Q15465 | ACGPGRGFGKRRHPKKLTPL  | Negative |
| Q15465 | LVCSGLACGPGRGFGKRRHP  | Negative |
| Q15465 | VLVSSLLVCSGLACGPGRGF  | Negative |
| Q15465 | SGLACGPGRGFGKRRHPKKL  | Negative |
| Q15465 | CLLLVLVSSLLVCSGLACGP  | Negative |
| Q15465 | CSGLACGPGRGFGKRRHPKK  | Negative |
| Q15465 | FGKRRHPKKLTPLAYKQFIP  | Negative |
| Q15465 | RCLLLVLVSSLLVCSGLACG  | Negative |
| Q15465 | LACGPGRGFGKRRHPKKLTP  | Negative |
| Q15465 | LLVCSGLACGPGRGFGKRRH  | Negative |
| Q15465 | LLARCLLLVLVSSLLVCSGL  | Negative |
| Q15465 | GLACGPGRGFGKRRHPKKLT  | Negative |
| Q15465 | ARCLLLVLVSSLLVCSGLAC  | Negative |
| Q15465 | SSLLVCSGLACGPGRGFGKR  | Negative |
| Q15465 | VSSLLVCSGLACGPGRGFGK  | Negative |
| Q15465 | SLLVCSGLACGPGRGFGKRR  | Negative |
| Q15465 | LLARCLLLVLVSSLLVCSG   | Negative |
| Q15465 | GFGKRRHPKKLTPLAYKQFI  | Negative |
| Q15465 | GRGFGKRRHPKKLTPLAYKQ  | Negative |
| Q15465 | MLLARCLLLVLVSSLLVCS   | Negative |
| Q15465 | LLVLVSSLLVCSGLACGPG   | Negative |
| Q15465 | LVSSLLVCSGLACGPGRGFG  | Negative |
| Q15582 | ALFVRLLALALALALGPAAT  | Negative |
| Q15582 | GPAATLAGPAKSPYQLVLQH  | Negative |
| Q15582 | ALALALGPAATLAGPAKSPY  | Negative |
| Q15582 | LAGPAKSPYQLVLQHSRLRG  | Negative |
| Q15582 | PAATLAGPAKSPYQLVLQHS  | Negative |

|        |                      |          |
|--------|----------------------|----------|
| Q15582 | LLALALALALGPAATLAGPA | Negative |
| Q15582 | RLLALALALALGPAATLAGP | Negative |
| Q15582 | PAKSPYQLVLQHSRLRGRQH | Negative |
| Q15582 | AKSPYQLVLQHSRLRGRQHG | Negative |
| Q15582 | LALGPAATLAGPAKSPYQLV | Negative |
| Q15582 | KSPYQLVLQHSRLRGRQHGP | Negative |
| Q15582 | LGPAATLAGPAKSPYQLVLQ | Negative |
| Q15582 | FVRLALALALALGPAATLA  | Negative |
| Q15582 | YQLVLQHSRLRGRQHGPNC  | Negative |
| Q15582 | SPYQLVLQHSRLRGRQHGP  | Negative |
| Q15582 | VRLALALALALGPAATLAG  | Negative |
| Q15582 | LALALALALGPAATLAGPAK | Negative |
| Q15582 | LALALALGPAATLAGPAKSP | Negative |
| Q15582 | PYQLVLQHSRLRGRQHGP   | Negative |
| Q15582 | ALALGPAATLAGPAKSPYQL | Negative |
| Q15582 | GPAKSPYQLVLQHSRLRGRQ | Negative |
| Q15582 | AGPAKSPYQLVLQHSRLRGR | Negative |
| Q15582 | LALALGPAATLAGPAKSPYQ | Negative |
| Q15582 | LFVRLALALALALGPAATL  | Negative |
| Q15582 | AATLAGPAKSPYQLVLQHSR | Negative |
| Q15582 | ALGPAATLAGPAKSPYQLVL | Negative |
| Q15582 | TLAGPAKSPYQLVLQHSRLR | Negative |
| Q15582 | MALFVRLALALALALGPAA  | Negative |
| Q15582 | ATLAGPAKSPYQLVLQHSRL | Negative |
| Q15848 | GVLLPLPKGACTGWMAGIPG | Negative |
| Q15848 | ETTTQGGVLLPLPKGACTG  | Negative |
| Q15848 | GPGVLLPLPKGACTGWMAGI | Negative |
| Q15848 | PLPKGACTGWMAGIPGHPGH | Negative |
| Q15848 | LLGAVLLLLALPGHDQETTT | Negative |
| Q15848 | LLPLPKGACTGWMAGIPGHP | Negative |
| Q15848 | LPGHDQETTTQGPGVLLPLP | Negative |
| Q15848 | GHDQETTTQGPGVLLPLPKG | Negative |
| Q15848 | QETTTQGPGVLLPLPKGACT | Negative |
| Q15848 | HDQETTTQGPGVLLPLPKGA | Negative |
| Q15848 | MLLGAVLLLLALPGHDQET  | Negative |
| Q15848 | LALPGHDQETTTQGPGVLLP | Negative |
| Q15848 | VLLLLALPGHDQETTTQGPG | Negative |
| Q15848 | LPLPKGACTGWMAGIPGHPG | Negative |
| Q15848 | LLALPGHDQETTTQGPGVLL | Negative |
| Q15848 | LLLALPGHDQETTTQGPGVL | Negative |
| Q15848 | QGPGVLLPLPKGACTGWMAG | Negative |
| Q15848 | ALPGHDQETTTQGPGVLLPL | Negative |
| Q15848 | DQETTTQGPGVLLPLPKGAC | Negative |
| Q15848 | AVLLLLALPGHDQETTTQGP | Negative |
| Q15848 | PGVLLPLPKGACTGWMAGIP | Negative |
| Q15848 | TQGPGVLLPLPKGACTGWMA | Negative |

|        |                      |          |
|--------|----------------------|----------|
| Q15848 | VLLPLPKGACTGWMAGIPGH | Negative |
| Q15848 | LLLGAVLLLLALPGHDQETT | Negative |
| Q15848 | GAVLLLLALPGHDQETTTQG | Negative |
| Q15848 | TTTQGPVLLPLPKGACTGW  | Negative |
| Q15848 | PGHDQETTTQGPVLLPLPK  | Negative |
| Q15848 | TTQGPVLLPLPKGACTGWM  | Negative |
| Q15848 | LLLLALPGHDQETTTQGPV  | Negative |
| Q16270 | AAGLLLLLLPLSSSSSDTC  | Negative |
| Q16270 | SSSSSDTCGPCEPASCPLP  | Negative |
| Q16270 | LGAAGLLLLLLPLSSSSSD  | Negative |
| Q16270 | SDTCGPCEPASCPLPLGC   | Negative |
| Q16270 | LLLLPLSSSSSDTCGPCE   | Negative |
| Q16270 | LLGAAGLLLLLLPLSSSSS  | Negative |
| Q16270 | AGLLLLLLPLSSSSSDTCG  | Negative |
| Q16270 | SLRALLGAAGLLLLLLPLS  | Negative |
| Q16270 | LPLSSSSSDTCGPCEPASC  | Negative |
| Q16270 | SSSSSDTCGPCEPASCPLP  | Negative |
| Q16270 | ERPSLRALLGAAGLLLLLL  | Negative |
| Q16270 | DTCGPCEPASCPLPLGCL   | Negative |
| Q16270 | LLPLSSSSSDTCGPCEPA   | Negative |
| Q16270 | PSLRALLGAAGLLLLLLPL  | Negative |
| Q16270 | LLLLPLSSSSSDTCGPCEP  | Negative |
| Q16270 | RPSLRALLGAAGLLLLLLP  | Negative |
| Q16270 | SSDTCGPCEPASCPLPLG   | Negative |
| Q16270 | LLGAAGLLLLLLPLSSSSS  | Negative |
| Q16270 | LLPLSSSSSDTCGPCEPAS  | Negative |
| Q16270 | LRALLGAAGLLLLLLPLSS  | Negative |
| Q16270 | PLSSSSSDTCGPCEPASC   | Negative |
| Q16270 | MERPSLRALLGAAGLLLLLL | Negative |
| Q16270 | ALLGAAGLLLLLLPLSSSS  | Negative |
| Q16270 | LLLLLLPLSSSSSDTCGPC  | Negative |
| Q16270 | LSSSSSDTCGPCEPASCPP  | Negative |
| Q16270 | SSSDTCGPCEPASCPLPPL  | Negative |
| Q16270 | GLLLLLLPLSSSSSDTCGP  | Negative |
| Q16270 | RALLGAAGLLLLLLPLSSS  | Negative |
| Q16270 | SSSDTCGPCEPASCPLPP   | Negative |
| Q16552 | KTSLVSLLLLLSLEAIVKAG | Negative |
| Q16552 | PRNPGCPNSEDKNFRTVMV  | Negative |
| Q16552 | SLVSLLLLLSLEAIVKAGIT | Negative |
| Q16552 | GKTSLVSLLLLLSLEAIVKA | Negative |
| Q16552 | TSLVSLLLLLSLEAIVKAGI | Negative |
| Q16552 | LLSLEAIVKAGITIPRNPGC | Negative |
| Q16552 | LLLLSLEAIVKAGITIPRNP | Negative |
| Q16552 | LEAIVKAGITIPRNPGCPNS | Negative |
| Q16552 | VKAGITIPRNPGCPNSEDKN | Negative |
| Q16552 | PGKTSLVSLLLLLSLEAIVK | Negative |

|        |                        |          |
|--------|------------------------|----------|
| Q16552 | IPRNP GCPN SEDKNFPRTVM | Negative |
| Q16552 | LLLLLSLEAIVKAGITIPRN   | Negative |
| Q16552 | ITIPRNPGCPN SEDKNFPRT  | Negative |
| Q16552 | LSLEAIVKAGITIPRNPGCP   | Negative |
| Q16552 | TPGKTSLVSLLLLLSLEAIV   | Negative |
| Q16552 | AIVKAGITIPRNPGCPN SED  | Negative |
| Q16552 | LVSLLLLLSLEAIVKAGITI   | Negative |
| Q16552 | SLLLLLSLEAIVKAGITIPR   | Negative |
| Q16552 | IVKAGITIPRNPGCPN SEDK  | Negative |
| Q16552 | KAGITIPRNPGCPN SEDKNF  | Negative |
| Q16552 | MTPGKTSLVSLLLLLSLEAI   | Negative |
| Q16552 | AGITIPRNPGCPN SEDKNFP  | Negative |
| Q16552 | RNP GCPN SEDKNFPRTVMVN | Negative |
| Q16552 | LLSLEAIVKAGITIPRNPG    | Negative |
| Q16552 | NPGCPN SEDKNFPRTVMVNL  | Negative |
| Q16552 | TIPRNPGCPN SEDKNFPRTV  | Negative |
| Q16552 | SLEAIVKAGITIPRNPGCPN   | Negative |
| Q16552 | EAIVKAGITIPRNPGCPNSE   | Negative |
| Q16552 | GITIPRNPGCPN SEDKNFPR  | Negative |
| Q16568 | LGTRAQEDAELQPRALDIYS   | Negative |
| Q16568 | RLLPLLGAALLMLPLLGT     | Negative |
| Q16568 | LLLMLPLLGTTRAQEDAELQP  | Negative |
| Q16568 | LPLLGTTRAQEDAELQPRALD  | Negative |
| Q16568 | LLMLPLLGTTRAQEDAELQPR  | Negative |
| Q16568 | TRAQEDAELQPRALDIYS AV  | Negative |
| Q16568 | ESSRVRLPLLGAALLMLP     | Negative |
| Q16568 | AQEDAELQPRALDIYS AVDD  | Negative |
| Q16568 | ALLMLPLLGTTRAQEDAELQ   | Negative |
| Q16568 | LLGAALLMLPLLGTTRAQED   | Negative |
| Q16568 | VRLPLLGAALLMLPLLGT     | Negative |
| Q16568 | PLLGTTRAQEDAELQPRALDI  | Negative |
| Q16568 | LPLLGAALLMLPLLGTTRAQ   | Negative |
| Q16568 | EDAELQPRALDIYS AVDDAS  | Negative |
| Q16568 | GTRAQEDAELQPRALDIYSA   | Negative |
| Q16568 | RAQEDAELQPRALDIYS AVD  | Negative |
| Q16568 | LGAALLMLPLLGTTRAQEDA   | Negative |
| Q16568 | AALLMLPLLGTTRAQEDAEL   | Negative |
| Q16568 | RVRLPLLGAALLMLPLLG     | Negative |
| Q16568 | QEDAELQPRALDIYS AVDDA  | Negative |
| Q16568 | PLLGAALLMLPLLGTTRAQE   | Negative |
| Q16568 | DAELQPRALDIYS AVDDASH  | Negative |
| Q16568 | LLPLLGAALLMLPLLGTTRA   | Negative |
| Q16568 | LLGTTRAQEDAELQPRALDIY  | Negative |
| Q16568 | SSRVRLPLLGAALLMLPL     | Negative |
| Q16568 | SRVRLPLLGAALLMLPLL     | Negative |
| Q16568 | MLPLLGTTRAQEDAELQPRAL  | Negative |

|        |                      |          |
|--------|----------------------|----------|
| Q16568 | LMLPLLGTRAQEDAELQPRA | Negative |
| Q16568 | MESSRVRLPLLGAALLML   | Negative |
| Q16627 | KTESSSRGPYHPSECCFTYT | Negative |
| Q16627 | SVAAIPFLLITIALGKTKE  | Negative |
| Q16627 | ITIALGKTTESSSRGPYHPS | Negative |
| Q16627 | SRGPYHPSECCFTYTTYKIP | Negative |
| Q16627 | RGPYHPSECCFTYTTYKIPR | Negative |
| Q16627 | ALGKTTESSSRGPYHPSECC | Negative |
| Q16627 | LLITIALGKTTESSSRGPYH | Negative |
| Q16627 | IALGKTTESSSRGPYHPSEC | Negative |
| Q16627 | ESSSRGPYHPSECCFTYTTY | Negative |
| Q16627 | YHPSECCFTYTTYKIPRQRI | Negative |
| Q16627 | FLLITIALGKTTESSSRGPY | Negative |
| Q16627 | KISVAAIPFLLITIALGTK  | Negative |
| Q16627 | TKTESSSRGPYHPSECCFTY | Negative |
| Q16627 | ISVAAIPFLLITIALGKKT  | Negative |
| Q16627 | GPYHPSECCFTYTTYKIPRQ | Negative |
| Q16627 | TESSSRGPYHPSECCFTYTT | Negative |
| Q16627 | PYHPSECCFTYTTYKIPRQR | Negative |
| Q16627 | GTKTESSSRGPYHPSECCFT | Negative |
| Q16627 | LITIALGKTTESSSRGPYHP | Negative |
| Q16627 | FFLLITIALGKTTESSSRGP | Negative |
| Q16627 | SSSRGPYHPSECCFTYTTYK | Negative |
| Q16627 | IPFLLITIALGKTTESSSR  | Negative |
| Q16627 | MKISVAAIPFLLITIALGT  | Negative |
| Q16627 | TIALGKTTESSSRGPYHPSE | Negative |
| Q16627 | SSRGPYHPSECCFTYTTYKI | Negative |
| Q16627 | AIPFLLITIALGKTTESSS  | Negative |
| Q16627 | LGKTTESSSRGPYHPSECCF | Negative |
| Q16627 | PFLLITIALGKTTESSSRG  | Negative |
| Q16627 | AAIPFLLITIALGKTTESS  | Negative |
| Q16663 | AETELMMSKLPLENPVVLNS | Negative |
| Q16663 | TELMMSKLPLENPVVLNSFH | Negative |
| Q16663 | ELMMSKLPLENPVVLNSFHF | Negative |
| Q16663 | SVAALSCLMLVAVLGSQAQF | Negative |
| Q16663 | SCLMLVAVLGSQAQFINDAE | Negative |
| Q16663 | INDAETELMMSKLPLENPVV | Negative |
| Q16663 | MKVSVAALSCLMLVAVLGSQ | Negative |
| Q16663 | MLVAVLGSQAQFINDAETEL | Negative |
| Q16663 | LSCLMLVAVLGSQAQFINDA | Negative |
| Q16663 | GSQAQFINDAETELMMSKLP | Negative |
| Q16663 | ETELMMSKLPLENPVVLNSF | Negative |
| Q16663 | VAVLGSQAQFINDAETELMM | Negative |
| Q16663 | VLGSQAQFINDAETELMMSK | Negative |
| Q16663 | AVLGSQAQFINDAETELMMS | Negative |
| Q16663 | LMLVAVLGSQAQFINDAETE | Negative |

|        |                       |          |
|--------|-----------------------|----------|
| Q16663 | VSVAALSCLMLVAVLGSQAQ  | Negative |
| Q16663 | NDAETELMMSKLPLENPVVL  | Negative |
| Q16663 | AQFINDAETELMMSKLPLEN  | Negative |
| Q16663 | VAALSCLMLVAVLGSQAQFI  | Negative |
| Q16663 | QAQFINDAETELMMSKLPLE  | Negative |
| Q16663 | DAETELMMSKLPLENPVVLN  | Negative |
| Q16663 | LGSQAQFINDAETELMMSKL  | Negative |
| Q16663 | LVAVLGSQAQFINDAETELM  | Negative |
| Q16663 | FINDAETELMMSKLPLENPV  | Negative |
| Q16663 | KVSVAALSCLMLVAVLGSQA  | Negative |
| Q16663 | QFINDAETELMMSKLPLENP  | Negative |
| Q16663 | CLMLVAVLGSQAQFINDAET  | Negative |
| Q16663 | AALSCLMLVAVLGSQAQFIN  | Negative |
| Q16663 | SQAQFINDAETELMMSKLPL  | Negative |
| Q16674 | LGVIILLSAFSGPGVRGGPM  | Negative |
| Q16674 | RGGPMPKLADRKLCADECS   | Negative |
| Q16674 | LLSAFSGPGVRGGPMPKLAD  | Negative |
| Q16674 | PMPKLADRKLCADECSHPI   | Negative |
| Q16674 | ARSLVCLGVIILLSAFSGPG  | Negative |
| Q16674 | PGVRGGPMPKLADRKLCADEQ | Negative |
| Q16674 | AFSGPGVRGGPMPKLADRKL  | Negative |
| Q16674 | MARSLVCLGVIILLSAFSGP  | Negative |
| Q16674 | GPMPKLADRKLCADECSHP   | Negative |
| Q16674 | GGPMPKLADRKLCADECSH   | Negative |
| Q16674 | VCLGVIILLSAFSGPGVRGG  | Negative |
| Q16674 | KLADRKLCADECSHPISMA   | Negative |
| Q16674 | RSLVCLGVIILLSAFSGPGV  | Negative |
| Q16674 | GVIILLSAFSGPGVRGGPMP  | Negative |
| Q16674 | LSAFSGPGVRGGPMPKLADR  | Negative |
| Q16674 | PKLADRKLCADECSHPISM   | Negative |
| Q16674 | ILLSAFSGPGVRGGPMPKLA  | Negative |
| Q16674 | SGPGVRGGPMPKLADRKLCA  | Negative |
| Q16674 | GVRGGPMPKLADRKLCADEQ  | Negative |
| Q16674 | IILLSAFSGPGVRGGPMPKL  | Negative |
| Q16674 | FSGPGVRGGPMPKLADRKL   | Negative |
| Q16674 | VRGGPMPKLADRKLCADEQ   | Negative |
| Q16674 | GPGVRGGPMPKLADRKLCA   | Negative |
| Q16674 | LADRKLCADECSHPISMAV   | Negative |
| Q16674 | LVCLGVIILLSAFSGPGVRG  | Negative |
| Q16674 | SLVCLGVIILLSAFSGPGVR  | Negative |
| Q16674 | SAFSGPGVRGGPMPKLADR   | Negative |
| Q16674 | MPKLADRKLCADECSHPIS   | Negative |
| Q16674 | CLGVIILLSAFSGPGVRGGP  | Negative |
| Q16927 | TDGITSRFGFNERRRTHNRN  | Negative |
| Q16927 | HNRNSCRILEDKMLAKLLLL  | Negative |
| Q16927 | NERRRTHNRNSCRILEDKML  | Negative |

|        |                       |          |
|--------|-----------------------|----------|
| Q16927 | FNERRRTHNRNSCRILEDKM  | Negative |
| Q16927 | GFNERRRTHNRNSCRILEDK  | Negative |
| Q16927 | ILEDKMLAKLLLLALAGLTA  | Negative |
| Q16927 | MATDGITSRFGFNERRRTHN  | Negative |
| Q16927 | DGITSRFGFNERRRTHNRNS  | Negative |
| Q16927 | LEDKMLAKLLLLALAGLTAA  | Negative |
| Q16927 | FGFNERRRTHNRNSCRILED  | Negative |
| Q16927 | RTHNRNSCRILEDKMLAKLL  | Negative |
| Q16927 | RRTHNRNSCRILEDKMLAKL  | Negative |
| Q16927 | SRFGFNERRRTHNRNSCRIL  | Negative |
| Q16927 | RILEDKMLAKLLLLALAGLT  | Negative |
| Q16927 | RNSCRILEDKMLAKLLLLAL  | Negative |
| Q16927 | KMLAKLLLLALAGLTAAAYQY | Negative |
| Q16927 | DKMLAKLLLLALAGLTAAAYQ | Negative |
| Q16927 | GITSRFGFNERRRTHNRNSC  | Negative |
| Q16927 | TSRFGFNERRRTHNRNSCRI  | Negative |
| Q16927 | EDKMLAKLLLLALAGLTAAAY | Negative |
| Q16927 | ITSRFGFNERRRTHNRNSCR  | Negative |
| Q16927 | NSCRILEDKMLAKLLLLALA  | Negative |
| Q16927 | SCRILEDKMLAKLLLLALAG  | Negative |
| Q16927 | RFGFNERRRTHNRNSCRILE  | Negative |
| Q16927 | NRNSCRILEDKMLAKLLLLA  | Negative |
| Q16927 | THNRNSCRILEDKMLAKLLL  | Negative |
| Q16927 | RRRTHNRNSCRILEDKMLAK  | Negative |
| Q16927 | CRILEDKMLAKLLLLALAGL  | Negative |
| Q16927 | ATDGITSRFGFNERRRTHNR  | Negative |
| Q16927 | ERRRTHNRNSCRILEDKMLA  | Negative |
| Q17043 | SQQSCDDEQCDETLNIAIVG  | Negative |
| Q17043 | LGLLIFVTSCSGRRVCESQQ  | Negative |
| Q17043 | RRVCESQQSCDDEQCDETLN  | Negative |
| Q17043 | VTSCSGRRVCESQQSCDDEQ  | Negative |
| Q17043 | ALGLLIFVTSCSGRRVCESQ  | Negative |
| Q17043 | LLIFVTSCSGRRVCESQQSC  | Negative |
| Q17043 | QQSCDDEQCDETLNIAIVGA  | Negative |
| Q17043 | TSCSGRRVCESQQSCDDEQC  | Negative |
| Q17043 | CDDEQCDETLNIAIVGAGPS  | Negative |
| Q17043 | SGRRVCESQQSCDDEQCDET  | Negative |
| Q17043 | IFVTSCSGRRVCESQQSCDD  | Negative |
| Q17043 | VRFLALGLLIFVTSCSGRRV  | Negative |
| Q17043 | FVTSCSGRRVCESQQSCDDE  | Negative |
| Q17043 | GLLIFVTSCSGRRVCESQQS  | Negative |
| Q17043 | SCSGRRVCESQQSCDDEQCD  | Negative |
| Q17043 | CESQQSCDDEQCDETLNIAI  | Negative |
| Q17043 | MAVRFLALGLLIFVTSCSGR  | Negative |
| Q17043 | AVRFLALGLLIFVTSCSGRR  | Negative |
| Q17043 | CSGRRVCESQQSCDDEQCDE  | Negative |

|        |                      |          |
|--------|----------------------|----------|
| Q17043 | ESQQSCDDEQCDETLNIAIV | Negative |
| Q17043 | SCDDEQCDETLNIAIVGAGP | Negative |
| Q17043 | QSCDDEQCDETLNIAIVGAG | Negative |
| Q17043 | LALGLLIFVTSCSGRRVCES | Negative |
| Q17043 | DDEQCDETLNIAIVGAGPSG | Negative |
| Q17043 | RVCESQQSCDDEQCDETLNI | Negative |
| Q17043 | GRRVCESQQSCDDEQCDETL | Negative |
| Q17043 | LIFVTSCSGRRVCESQQSCD | Negative |
| Q17043 | RFLALGLLIFVTSCSGRRVC | Negative |
| Q17043 | VCESQQSCDDEQCDETLNIA | Negative |
| Q17058 | VIVFCLMALSIVDAAWKPLP | Negative |
| Q17058 | KEDLIVYQVYPRSFKDSNGD | Negative |
| Q17058 | WKPLPENLKEDLIVYQVYPR | Negative |
| Q17058 | IVDAAWKPLPENLKEDLIVY | Negative |
| Q17058 | LSIVDAAWKPLPENLKEDLI | Negative |
| Q17058 | LPENLKEDLIVYQVYPRSF  | Negative |
| Q17058 | ENLKEDLIVYQVYPRSFKDS | Negative |
| Q17058 | NLKEDLIVYQVYPRSFKDSN | Negative |
| Q17058 | MALSIVDAAWKPLPENLKED | Negative |
| Q17058 | SIVDAAWKPLPENLKEDLIV | Negative |
| Q17058 | PLPENLKEDLIVYQVYPRSF | Negative |
| Q17058 | IVFCLMALSIVDAAWKPLPE | Negative |
| Q17058 | KPLPENLKEDLIVYQVYPRS | Negative |
| Q17058 | DAAWKPLPENLKEDLIVYQV | Negative |
| Q17058 | PENLKEDLIVYQVYPRSFKD | Negative |
| Q17058 | LKEDLIVYQVYPRSFKDSNG | Negative |
| Q17058 | LIVYQVYPRSFKDSNGDGIG | Negative |
| Q17058 | MKAVIVFCLMALSIVDAAWK | Negative |
| Q17058 | AAWKPLPENLKEDLIVYQVY | Negative |
| Q17058 | AWKPLPENLKEDLIVYQVYP | Negative |
| Q17058 | LMALSIVDAAWKPLPENLKE | Negative |
| Q17058 | KAVIVFCLMALSIVDAAWKP | Negative |
| Q17058 | ALSIVDAAWKPLPENLKEDL | Negative |
| Q17058 | DLIVYQVYPRSFKDSNGDGI | Negative |
| Q17058 | CLMALSIVDAAWKPLPENLK | Negative |
| Q17058 | VFCLMALSIVDAAWKPLPEN | Negative |
| Q17058 | VDAAWKPLPENLKEDLIVYQ | Negative |
| Q17058 | EDLIVYQVYPRSFKDSNGDG | Negative |
| Q17058 | FCLMALSIVDAAWKPLPENL | Negative |
| Q17060 | NHQRKSANNLAHSMKVIYEW | Negative |
| Q17060 | ACQDVTSAAVNHQRKSANNL | Negative |
| Q17060 | IACQDVTSAAVNHQRKSANN | Negative |
| Q17060 | VTSAAVNHQRKSANNLAHSM | Negative |
| Q17060 | TSAAVNHQRKSANNLAHSMK | Negative |
| Q17060 | TKWLLLVVCLGIACQDVTSA | Negative |
| Q17060 | KWLLLVVCLGIACQDVTSA  | Negative |



|        |                      |          |
|--------|----------------------|----------|
| Q17060 | WLLLVVCLGIACQDVTSAAV | Negative |
| Q17060 | LVVCLGIACQDVTSAAVNHQ | Negative |
| Q17060 | GIACQDVTSAAVNHQRKSAN | Negative |
| Q17060 | CLGIACQDVTSAAVNHQRKS | Negative |
| Q17060 | VNHQRKSANNLAHSMKVIYE | Negative |
| Q17060 | DVTSAAVNHQRKSANNLAHS | Negative |
| Q17060 | HQRKSANNLAHSMKVIYEWK | Negative |
| Q17060 | SANNLAHSMKVIYEWKHIDF | Negative |
| Q17060 | KSANNLAHSMKVIYEWKHID | Negative |
| Q17060 | QRKSANNLAHSMKVIYEWKH | Negative |
| Q17060 | QDVTSAAVNHQRKSANNLAH | Negative |
| Q17060 | LGIACQDVTSAAVNHQRKSA | Negative |
| Q17060 | RKSANNLAHSMKVIYEWKHI | Negative |
| Q17060 | VVCLGIACQDVTSAAVNHQR | Negative |
| Q17060 | VCLGIACQDVTSAAVNHQRK | Negative |
| Q17060 | AVNHQRKSANNLAHSMKVIY | Negative |
| Q17060 | ANNLAHSMKVIYEWKHIDFD | Negative |
| Q17060 | MTKWLLLVVCLGIACQDVT  | Negative |
| Q17060 | LLLVVCLGIACQDVTSAAVN | Negative |
| Q17060 | AAVNHQRKSANNLAHSMKVI | Negative |
| Q17060 | SAAVNHQRKSANNLAHSMKV | Negative |
| Q17060 | CQDVTSAAVNHQRKSANNLA | Negative |
| Q17128 | VNFSPGWGTGKRSAVQDSPC | Negative |
| Q17128 | LVKVLIVVVAIALVLCEAQV | Negative |
| Q17128 | IALVLCEAQVNFSPGWGTGK | Negative |
| Q17128 | KVLIVVVAIALVLCEAQVNF | Negative |
| Q17128 | GWGTGKRSAVQDSPCKGSAE | Negative |
| Q17128 | AQVNFSPGWGTGKRSAVQDS | Negative |
| Q17128 | CEAQVNFSPGWGTGKRSAVQ | Negative |
| Q17128 | VKVLIVVVAIALVLCEAQVN | Negative |
| Q17128 | VVAIALVLCEAQVNFSPGWG | Negative |
| Q17128 | AIALVLCEAQVNFSPGWGTG | Negative |
| Q17128 | LCEAQVNFSPGWGTGKRSAV | Negative |
| Q17128 | WGTGKRSAVQDSPCKGSAES | Negative |
| Q17128 | FSPGWGTGKRSAVQDSPCKG | Negative |
| Q17128 | LVLCEAQVNFSPGWGTGKRS | Negative |
| Q17128 | SPGWGTGKRSAVQDSPCKGS | Negative |
| Q17128 | NHLVKVLIVVVAIALVLCEA | Negative |
| Q17128 | NFSPGWGTGKRSAVQDSPCK | Negative |
| Q17128 | VAIALVLCEAQVNFSPGWGT | Negative |
| Q17128 | IVVVAIALVLCEAQVNFSPG | Negative |
| Q17128 | ALVLCEAQVNFSPGWGTGKR | Negative |
| Q17128 | MNHLVKVLIVVVAIALVLCE | Negative |
| Q17128 | GTGKRSAVQDSPCKGSAESL | Negative |
| Q17128 | LIVVVAIALVLCEAQVNFSP | Negative |
| Q17128 | VVVAIALVLCEAQVNFSPGW | Negative |

|        |                      |          |
|--------|----------------------|----------|
| Q17128 | QVNFSPGWTGKRSVQDSP   | Negative |
| Q17128 | VLCEAQVNFSPGWTGKRSA  | Negative |
| Q17128 | HLVKVLIVVVAIALVLCEAQ | Negative |
| Q17128 | EAQVNFSPGWTGKRSVQD   | Negative |
| Q17128 | PGWGTGKRSVQDSPCKGSA  | Negative |
| Q18184 | AITLMTFSSAQPIDEERPIF | Negative |
| Q18184 | RPIFMERREASAFGDIIGEL | Negative |
| Q18184 | LVAITLMTFSSAQPIDEERP | Negative |
| Q18184 | ITLMTFSSAQPIDEERPIFM | Negative |
| Q18184 | QPIDEERPIFMERREASAFG | Negative |
| Q18184 | DEERPIFMERREASAFGDII | Negative |
| Q18184 | TFSSAQPIDEERPIFMERRE | Negative |
| Q18184 | QILTFLLVAITLMTFSSAQ  | Negative |
| Q18184 | FSLTQILTFLLVAITLMTFS | Negative |
| Q18184 | TLMTFSSAQPIDEERPIFME | Negative |
| Q18184 | SAQPIDEERPIFMERREASA | Negative |
| Q18184 | EERPIFMERREASAFGDIIG | Negative |
| Q18184 | FLLVAITLMTFSSAQPIDEE | Negative |
| Q18184 | ILTFLLVAITLMTFSSAQPI | Negative |
| Q18184 | SSAQPIDEERPIFMERREAS | Negative |
| Q18184 | ERPIFMERREASAFGDIIGE | Negative |
| Q18184 | LLVAITLMTFSSAQPIDEER | Negative |
| Q18184 | MTFSSAQPIDEERPIFMERR | Negative |
| Q18184 | VAITLMTFSSAQPIDEERPI | Negative |
| Q18184 | MFSLTQILTFLLVAITLMTF | Negative |
| Q18184 | FSSAQPIDEERPIFMERREA | Negative |
| Q18184 | PIDEERPIFMERREASAFGD | Negative |
| Q18184 | TQILTFLLVAITLMTFSSAQ | Negative |
| Q18184 | AQPIDEERPIFMERREASAF | Negative |
| Q18184 | LTQILTFLLVAITLMTFSSA | Negative |
| Q18184 | LMTFSSAQPIDEERPIFMER | Negative |
| Q18184 | LTFLLVAITLMTFSSAQPID | Negative |
| Q18184 | SLTQILTFLLVAITLMTFSS | Negative |
| Q18184 | IDEERPIFMERREASAFGDI | Negative |
| Q1RP79 | VAVCLIGVEGNLFQFAKMIN | Negative |
| Q1RP79 | KLGAFSVWNYISYGCYCGWG | Negative |
| Q1RP79 | NLFQFAKMINGKLGAFSVWN | Negative |
| Q1RP79 | EGNLFQFAKMINGKLGAFSV | Negative |
| Q1RP79 | VEGNLFQFAKMINGKLGAFS | Negative |
| Q1RP79 | GKLGAFSVWNYISYGCYCGW | Negative |
| Q1RP79 | IVAVCLIGVEGNLFQFAKMI | Negative |
| Q1RP79 | VCLIGVEGNLFQFAKMINGK | Negative |
| Q1RP79 | ILWIVAVCLIGVEGNLFQFA | Negative |
| Q1RP79 | LFQFAKMINGKLGAFSVWNY | Negative |
| Q1RP79 | GVEGNLFQFAKMINGKLGA  | Negative |
| Q1RP79 | QFAKMINGKLGAFSVWNYIS | Negative |

|        |                      |          |
|--------|----------------------|----------|
| Q1RP79 | GNLFQFAKMINGKLGAFSVW | Negative |
| Q1RP79 | MINGKLGAFSVWNYISYGCY | Negative |
| Q1RP79 | LGAFSVWNYISYGCYCGWGG | Negative |
| Q1RP79 | KMINGKLGAFSVWNYISYGC | Negative |
| Q1RP79 | AKMINGKLGAFSVWNYISYG | Negative |
| Q1RP79 | NGKLGAFSVWNYISYGCYCG | Negative |
| Q1RP79 | WIVAVCLIGVEGNLFQFAKM | Negative |
| Q1RP79 | GAFSVWNYISYGCYCGWGGQ | Negative |
| Q1RP79 | FQFAKMINGKLGAFSVWNYI | Negative |
| Q1RP79 | IGVEGNLFQFAKMINGKLG  | Negative |
| Q1RP79 | FAKMINGKLGAFSVWNYISY | Negative |
| Q1RP79 | AVCLIGVEGNLFQFAKMING | Negative |
| Q1RP79 | INGKLGAFSVWNYISYGCYC | Negative |
| Q1RP79 | LWIVAVCLIGVEGNLFQFAK | Negative |
| Q1RP79 | LIGVEGNLFQFAKMINGKLG | Negative |
| Q1RP79 | MRILWIVAVCLIGVEGNLFQ | Negative |
| Q1RP79 | CLIGVEGNLFQFAKMINGKL | Negative |
| Q1XG90 | MNFLILFCVVASASVVYSSI | Negative |
| Q1XG90 | DQCLRCICEVESGCRAIGCH | Negative |
| Q1XG90 | CICEVESGCRAIGCHWDVYS | Negative |
| Q1XG90 | SDQCLRCICEVESGCRAIGC | Negative |
| Q1XG90 | ILFCVVASASVVYSSISDQC | Negative |
| Q1XG90 | VYSSISDQCLRCICEVESGC | Negative |
| Q1XG90 | ASASVVYSSISDQCLRCICE | Negative |
| Q1XG90 | SISDQCLRCICEVESGCRAI | Negative |
| Q1XG90 | SSISDQCLRCICEVESGCRA | Negative |
| Q1XG90 | SVYSSISDQCLRCICEVES  | Negative |
| Q1XG90 | VVASASVVYSSISDQCLRCI | Negative |
| Q1XG90 | RCICEVESGCRAIGCHWDVY | Negative |
| Q1XG90 | ISDQCLRCICEVESGCRAIG | Negative |
| Q1XG90 | CLRCICEVESGCRAIGCHWD | Negative |
| Q1XG90 | ICEVESGCRAIGCHWDVYSN | Negative |
| Q1XG90 | SASVVYSSISDQCLRCICEV | Negative |
| Q1XG90 | YSSISDQCLRCICEVESGCR | Negative |
| Q1XG90 | FLILFCVVASASVVYSSISD | Negative |
| Q1XG90 | CEVESGCRAIGCHWDVYSNS | Negative |
| Q1XG90 | EVESGCRAIGCHWDVYSNSC | Negative |
| Q1XG90 | VASASVVYSSISDQCLRCIC | Negative |
| Q1XG90 | VYSSISDQCLRCICEVESG  | Negative |
| Q1XG90 | NFLILFCVVASASVVYSSIS | Negative |
| Q1XG90 | QCLRCICEVESGCRAIGCHW | Negative |
| Q1XG90 | ASVVYSSISDQCLRCICEVE | Negative |
| Q1XG90 | LRCICEVESGCRAIGCHWDV | Negative |
| Q1XG90 | LFCVVASASVVYSSISDQCL | Negative |
| Q1XG90 | CVVASASVVYSSISDQCLRC | Negative |
| Q1XG90 | FCVVASASVVYSSISDQCLR | Negative |

|        |                      |          |
|--------|----------------------|----------|
| Q1ZY03 | GHLLQFNKMIKIMTRKNAFP | Negative |
| Q1ZY03 | VAVLLVSVEGHLLQFNKMIK | Negative |
| Q1ZY03 | LWIVAVLLVSVEGHLLQFNK | Negative |
| Q1ZY03 | VSVEGHLLQFNKMIKIMTRK | Negative |
| Q1ZY03 | LLVSVEGHLLQFNKMIKIMT | Negative |
| Q1ZY03 | RKNAFPFYTSYGCYCGWGGR | Negative |
| Q1ZY03 | SVEGHLLQFNKMIKIMTRKN | Negative |
| Q1ZY03 | AVLLVSVEGHLLQFNKMIKI | Negative |
| Q1ZY03 | IMTRKNAFPFYTSYGCYCGW | Negative |
| Q1ZY03 | LQFNKMIKIMTRKNAFPFYT | Negative |
| Q1ZY03 | KIMTRKNAFPFYTSYGCYCG | Negative |
| Q1ZY03 | IVAVLLVSVEGHLLQFNKMI | Negative |
| Q1ZY03 | WIVAVLLVSVEGHLLQFNKM | Negative |
| Q1ZY03 | EGHLLQFNKMIKIMTRKNAF | Negative |
| Q1ZY03 | VLLVSVEGHLLQFNKMIKIM | Negative |
| Q1ZY03 | VEGHLLQFNKMIKIMTRKNA | Negative |
| Q1ZY03 | QFNKMIKIMTRKNAFPFYTS | Negative |
| Q1ZY03 | IKIMTRKNAFPFYTSYGCYC | Negative |
| Q1ZY03 | LLQFNKMIKIMTRKNAFPFY | Negative |
| Q1ZY03 | KMIKIMTRKNAFPFYTSYGC | Negative |
| Q1ZY03 | TRKNAFPFYTSYGCYCGWGG | Negative |
| Q1ZY03 | MRTLWIVAVLLVSVEGHLLQ | Negative |
| Q1ZY03 | MIKIMTRKNAFPFYTSYGCY | Negative |
| Q1ZY03 | FNKMIKIMTRKNAFPFYTSY | Negative |
| Q1ZY03 | TLWIVAVLLVSVEGHLLQFN | Negative |
| Q1ZY03 | HLLQFNKMIKIMTRKNAFPF | Negative |
| Q1ZY03 | LVSVEGHLLQFNKMIKIMTR | Negative |
| Q1ZY03 | MTRKNAFPFYTSYGCYCGWG | Negative |
| Q1ZY03 | NKMIKIMTRKNAFPFYTSYG | Negative |
| Q1ZYQ8 | MAVNVRTMWSSMRAQVAMVV | Negative |
| Q1ZYQ8 | GAWCGPPKVPPGKNITATYG | Negative |
| Q1ZYQ8 | MRAQVAMVVALVFLVRGAWC | Negative |
| Q1ZYQ8 | MWSSMRAQVAMVVALVFLVR | Negative |
| Q1ZYQ8 | RAQVAMVVALVFLVRGAWCG | Negative |
| Q1ZYQ8 | SMRAQVAMVVALVFLVRGAW | Negative |
| Q1ZYQ8 | AWCGPPKVPPGKNITATYGK | Negative |
| Q1ZYQ8 | QVAMVVALVFLVRGAWCGPP | Negative |
| Q1ZYQ8 | WSSMRAQVAMVVALVFLVRG | Negative |
| Q1ZYQ8 | LVFLVRGAWCGPPKVPPGKN | Negative |
| Q1ZYQ8 | MVVALVFLVRGAWCGPPKVP | Negative |
| Q1ZYQ8 | RGAWCGPPKVPPGKNITATY | Negative |
| Q1ZYQ8 | VRTMWSSMRAQVAMVVALVF | Negative |
| Q1ZYQ8 | WCGPPKVPPGKNITATYGKD | Negative |
| Q1ZYQ8 | VNVRTMWSSMRAQVAMVVAL | Negative |
| Q1ZYQ8 | VFLVRGAWCGPPKVPPGKNI | Negative |
| Q1ZYQ8 | AVNVRTMWSSMRAQVAMVVA | Negative |

|        |                       |          |
|--------|-----------------------|----------|
| Q1ZYQ8 | LVRGAWCGPPKVPPGKNITA  | Negative |
| Q1ZYQ8 | VAMVVALVFLVRGAWCGPPK  | Negative |
| Q1ZYQ8 | NVRTMWSSMRAQVAMVVALV  | Negative |
| Q1ZYQ8 | SSMRAQVAMVVALVFLVRGA  | Negative |
| Q1ZYQ8 | FLVRGAWCGPPKVPPGKNIT  | Negative |
| Q1ZYQ8 | TMWSSMRAQVAMVVALVFLV  | Negative |
| Q1ZYQ8 | AQVAMVVALVFLVRGAWCGP  | Negative |
| Q1ZYQ8 | ALVFLVRGAWCGPPKVPPGK  | Negative |
| Q1ZYQ8 | RTMWSSMRAQVAMVVALVFL  | Negative |
| Q1ZYQ8 | VVALVFLVRGAWCGPPKVPP  | Negative |
| Q1ZYQ8 | VRGAWCGPPKVPPGKNITAT  | Negative |
| Q1ZYQ8 | VALVFLVRGAWCGPPKVPPG  | Negative |
| Q20224 | SKFLILLAFCGATLVAAEQL  | Negative |
| Q20224 | QLPEKIFYGTFDLDHSENFDE | Negative |
| Q20224 | YGTFDLDHSENFDEYLTAKG  | Negative |
| Q20224 | CGATLVAAEQLPEKIFYGTFD | Negative |
| Q20224 | PEKIFYGTFDLDHSENFDEYL | Negative |
| Q20224 | LVAAEQLPEKIFYGTFDLDHS | Negative |
| Q20224 | TLVAAEQLPEKIFYGTFDLDH | Negative |
| Q20224 | LLAFCGATLVAAEQLPEKIFY | Negative |
| Q20224 | KFLILLAFCGATLVAAEQLP  | Negative |
| Q20224 | KFYGTFDLDHSENFDEYLTAK | Negative |
| Q20224 | GATLVAAEQLPEKIFYGTFDL | Negative |
| Q20224 | LPEKIFYGTFDLDHSENFDEY | Negative |
| Q20224 | ILLAFCGATLVAAEQLPEKF  | Negative |
| Q20224 | GTFDLHDSENFDEYLTAKGY  | Negative |
| Q20224 | FCGATLVAAEQLPEKIFYGTF | Negative |
| Q20224 | AAEQLPEKIFYGTFDLDHSEN | Negative |
| Q20224 | TFDLHDSENFDEYLTAKGYG  | Negative |
| Q20224 | VAAEQLPEKIFYGTFDLDHSE | Negative |
| Q20224 | FDLDHSENFDEYLTAKGYGW  | Negative |
| Q20224 | AEQLPEKIFYGTFDLDHSENF | Negative |
| Q20224 | EQLPEKIFYGTFDLDHSENF  | Negative |
| Q20224 | LAFCGATLVAAEQLPEKIFYG | Negative |
| Q20224 | EKFYGTFDLDHSENFDEYLT  | Negative |
| Q20224 | ATLVAAEQLPEKIFYGTFDLD | Negative |
| Q20224 | FYGTFDLDHSENFDEYLTAK  | Negative |
| Q20224 | MSSKFLILLAFCGATLVAAE  | Negative |
| Q20224 | LILLAFCGATLVAAEQLPEK  | Negative |
| Q20224 | AFCGATLVAAEQLPEKIFYGT | Negative |
| Q20224 | SSKFLILLAFCGATLVAAEQ  | Negative |
| Q23997 | LAIVSLCLASIQASKVGAPQ  | Negative |
| Q23997 | LASIQASKVGAPQLPKKHLV  | Negative |
| Q23997 | ASIQASKVGAPQLPKKHLVC  | Negative |
| Q23997 | VGAPQLPKKHLVCYYDSASF  | Negative |
| Q23997 | IICALAIVSLCLASIQASKV  | Negative |

|        |                       |          |
|--------|-----------------------|----------|
| Q23997 | AIVSLCLASIQASKVGAPQL  | Negative |
| Q23997 | KVGAPQLPKKHLVCYYDSAS  | Negative |
| Q23997 | KKHLVCYYDSASFVKEGLGK  | Negative |
| Q23997 | GAPQLPKKHLVCYYDSASFV  | Negative |
| Q23997 | QLPKKHLVCYYDSASFVKEG  | Negative |
| Q23997 | ALAIIVSLCLASIQASKVGAP | Negative |
| Q23997 | LPKKHLVCYYDSASFVKEGL  | Negative |
| Q23997 | MIKALAIIVSLCLASIQASK  | Negative |
| Q23997 | APQLPKKHLVCYYDSASFVK  | Negative |
| Q23997 | IQASKVGAPQLPKKHLVCYY  | Negative |
| Q23997 | QASKVGAPQLPKKHLVCYYD  | Negative |
| Q23997 | IKALAIIVSLCLASIQASKVG | Negative |
| Q23997 | SIQASKVGAPQLPKKHLVCY  | Negative |
| Q23997 | SLCLASIQASKVGAPQLPKK  | Negative |
| Q23997 | HLVCYYDSASFVKEGLGKL   | Negative |
| Q23997 | LCLASIQASKVGAPQLPKKH  | Negative |
| Q23997 | VSLCLASIQASKVGAPQLPK  | Negative |
| Q23997 | PKKHLVCYYDSASFVKEGLG  | Negative |
| Q23997 | KHLVCYYDSASFVKEGLGKL  | Negative |
| Q23997 | SKVGAPQLPKKHLVCYYDSA  | Negative |
| Q23997 | PQLPKKHLVCYYDSASFVKE  | Negative |
| Q23997 | ASKVGAPQLPKKHLVCYYDS  | Negative |
| Q23997 | IVSLCLASIQASKVGAPQLP  | Negative |
| Q23997 | CLASIQASKVGAPQLPKKHL  | Negative |
| Q24824 | GAILCNLCKDTVKLVENLLT  | Negative |
| Q24824 | RAIIFVLIFAIAFAATREGA  | Negative |
| Q24824 | REGAILCNLCKDTVKLVENL  | Negative |
| Q24824 | DTVKLVENLLTVDGAQAVRQ  | Negative |
| Q24824 | LCNLCKDTVKLVENLLTVDG  | Negative |
| Q24824 | TREGAILCNLCKDTVKLVEN  | Negative |
| Q24824 | CNLCKDTVKLVENLLTVDGA  | Negative |
| Q24824 | IIFVLIFAIAFAATREGAIL  | Negative |
| Q24824 | EGAILCNLCKDTVKLVENLL  | Negative |
| Q24824 | FVLIFAIAFAATREGAILCN  | Negative |
| Q24824 | AATREGAILCNLCKDTVKL   | Negative |
| Q24824 | IAFAATREGAILCNLCKDTV  | Negative |
| Q24824 | AIIFVLIFAIAFAATREGAI  | Negative |
| Q24824 | AIAFAATREGAILCNLCKDT  | Negative |
| Q24824 | MRAIIFVLIFAIAFAATREG  | Negative |
| Q24824 | TVKLVENLLTVDGAQAVRQY  | Negative |
| Q24824 | ATREGAILCNLCKDTVKLVE  | Negative |
| Q24824 | CKDTVKLVENLLTVDGAQAV  | Negative |
| Q24824 | VLIFAIAFAATREGAILCNL  | Negative |
| Q24824 | ILCNLCKDTVKLVENLLTVD  | Negative |
| Q24824 | FAATREGAILCNLCKDTVKL  | Negative |
| Q24824 | NLCKDTVKLVENLLTVDGAQ  | Negative |

|        |                          |          |
|--------|--------------------------|----------|
| Q24824 | AILCNLCKDTVKLVENLLTV     | Negative |
| Q24824 | LIFAIFAATREGAILCNLC      | Negative |
| Q24824 | FAIAFAATREGAILCNLCKD     | Negative |
| Q24824 | AFAATREGAILCNLCKDTVK     | Negative |
| Q24824 | KDTVKLVENLLTVDGAQAVR     | Negative |
| Q24824 | IFAIAFAATREGAILCNLCK     | Negative |
| Q24824 | LCKDTVKLVENLLTVDGAQA     | Negative |
| Q24825 | CVFVLCLASQEKQQDREIPV     | Negative |
| Q24825 | DREIPVLCPVCTSLVGKLID     | Negative |
| Q24825 | PVCTSLVGKLIDLVLGGAVD     | Negative |
| Q24825 | LCPVCTSLVGKLIDLVLGGA     | Negative |
| Q24825 | QEKQQDREIPVLCPVCTSLV     | Negative |
| Q24825 | VFVLCLASQEKQQDREIPVL     | Negative |
| Q24825 | EIPVLCPVCTSLVGKLIDL      | Negative |
| Q24825 | FVLLCVFVLCLASQEKQQDR     | Negative |
| Q24825 | LASQEKQQDREIPVLCPVCT     | Negative |
| Q24825 | KLFVLLCVFVLCLASQEKQQ     | Negative |
| Q24825 | LLCVFVLCLASQEKQQDREI     | Negative |
| Q24825 | LCVFVLCLASQEKQQDREIP     | Negative |
| Q24825 | QQDREIPVLCPVCTSLVGKL     | Negative |
| Q24825 | MKLFVLLCVFVLCLASQEKQ     | Negative |
| Q24825 | VLCLASQEKQQDREIPVLC      | Negative |
| Q24825 | IPVLCPVCTSLVGKLIDLVL     | Negative |
| Q24825 | QDREIPVLCPVCTSLVGKLI     | Negative |
| Q24825 | EKQQDREIPVLCPVCTSLVG     | Negative |
| Q24825 | ASQEKQQDREIPVLCPVCTS     | Negative |
| Q24825 | VLCPVCTSLVGKLIDLVLGG     | Negative |
| Q24825 | LFVLLCVFVLCLASQEKQQD     | Negative |
| Q24825 | CPVCTSLVGKLIDLVLGGAV     | Negative |
| Q24825 | PVLCPVCTSLVGKLIDLVLG     | Negative |
| Q24825 | CLASQEKQQDREIPVLC        | Negative |
| Q24825 | KQQDREIPVLCPVCTSLVGK     | Negative |
| Q24825 | SQEKQQDREIPVLCPVCTSL     | Negative |
| Q24825 | LCLASQEKQQDREIPVLC       | Negative |
| Q24825 | REIPVLCPVCTSLVGKLIDL     | Negative |
| Q24825 | VLLCVFVLCLASQEKQQDRE     | Negative |
| Q25055 | ASAMPYGP GDGHGGGGHGGGH   | Negative |
| Q25055 | AVASAMPYGP GDGHGGGGHGG   | Negative |
| Q25055 | MNKLILGLACIIAVASAMP      | Negative |
| Q25055 | GDGHGGGGHGGGGHGGGHGNGQ   | Negative |
| Q25055 | SAMPYGP GDGHGGGGHGGGHG   | Negative |
| Q25055 | LACIIAVASAMPYGP GDGHG    | Negative |
| Q25055 | DGHGGGGHGGGGHGGGHGNGQG   | Negative |
| Q25055 | GGGGHGGGGHGGGGHGGGGHGN   | Negative |
| Q25055 | GP GDGHGGGGHGGGGHGGGGHGN | Negative |
| Q25055 | LILGLACIIAVASAMPYGP      | Negative |

|        |                      |          |
|--------|----------------------|----------|
| Q25055 | GHGGGHGGGHGNGQGGGHGH | Negative |
| Q25055 | HGGGHGGGHGGGHGNGQGGG | Negative |
| Q25055 | ACIIAVASAMPYGPGDGHGG | Negative |
| Q25055 | IIAVASAMPYGPGDGHGGGH | Negative |
| Q25055 | PGDGHGGGHGGGHGGGHGNG | Negative |
| Q25055 | GGHGGGHGGGHGNGQGGGHG | Negative |
| Q25055 | NKLIILGLACIIAVASAMPY | Negative |
| Q25055 | GLACIIAVASAMPYGPGDGH | Negative |
| Q25055 | IAVASAMPYGPGDGHGGGHG | Negative |
| Q25055 | YGPGDGHGGGHGGGHGGGHG | Negative |
| Q25055 | VASAMPYGPGDGHGGGHGGG | Negative |
| Q25055 | MPYGPGDGHGGGHGGGHGGG | Negative |
| Q25055 | GHGGGHGGGHGGGHGNGQGG | Negative |
| Q25055 | AMPYGPGDGHGGGHGGGHGG | Negative |
| Q25055 | IILGLACIIAVASAMPYGPG | Negative |
| Q25055 | LGLACIIAVASAMPYGPGDG | Negative |
| Q25055 | PYGPGDGHGGGHGGGHGGGH | Negative |
| Q25055 | KLIILGLACIIAVASAMPYG | Negative |
| Q25055 | CIIAVASAMPYGPGDGHGGG | Negative |
| Q25154 | SVEGVSRMEKLLSSSISPSS | Negative |
| Q25154 | VGGRSVEGVSRMEKLLSSSI | Negative |
| Q25154 | TLCLVVVMVASLGTSVGGR  | Negative |
| Q25154 | LCLVVVMVASLGTSVGGRS  | Negative |
| Q25154 | VASLGTSVGGRSVEGVSRM  | Negative |
| Q25154 | SGVGGRSVEGVSRMEKLLSS | Negative |
| Q25154 | GTSVGGRSVEGVSRMEKLL  | Negative |
| Q25154 | MFACRTLCLVVVMVASLGTS | Negative |
| Q25154 | VSRMEKLLSSSISPSTPLG  | Negative |
| Q25154 | FACRTLCLVVVMVASLGTS  | Negative |
| Q25154 | MVASLGTSVGGRSVEGVSR  | Negative |
| Q25154 | ASLGTSVGGRSVEGVSRME  | Negative |
| Q25154 | TSGVGGRSVEGVSRMEKLLS | Negative |
| Q25154 | VMVASLGTSVGGRSVEGVS  | Negative |
| Q25154 | RSVEGVSRMEKLLSSSISP  | Negative |
| Q25154 | VVMVASLGTSVGGRSVEGV  | Negative |
| Q25154 | SLGTSVGGRSVEGVSRMEK  | Negative |
| Q25154 | CLVVVMVASLGTSVGGRSV  | Negative |
| Q25154 | EGVSRMEKLLSSSISPSTP  | Negative |
| Q25154 | LGTSGVGGRSVEGVSRMEKL | Negative |
| Q25154 | GVSMEKLLSSSISPSTPL   | Negative |
| Q25154 | RTLCLVVVMVASLGTSVG   | Negative |
| Q25154 | GVGGRSVEGVSRMEKLLSSS | Negative |
| Q25154 | LVVVMMVASLGTSVGGRSVE | Negative |
| Q25154 | GRSVEGVSRMEKLLSSSISP | Negative |
| Q25154 | ACRTLCLVVVMVASLGTSV  | Negative |
| Q25154 | VEGVSRMEKLLSSSISPST  | Negative |



|        |                      |          |
|--------|----------------------|----------|
| Q25154 | GGRSVEGVSRMEKLLSSSIS | Negative |
| Q25154 | CRTLCLVVVMVASLGTSGVG | Negative |
| Q25255 | LQITTGCLLLMVAAIGKTS  | Negative |
| Q25255 | TTGCLLLMVAAIGKTS     | Negative |
| Q25255 | SMSETCEYTPDGFIADPNSC | Negative |
| Q25255 | MVAAIGKTS            | Negative |
| Q25255 | YSMSETCEYTPDGFIADPNS | Negative |
| Q25255 | TCEYTPDGFIADPNSCQSYG | Negative |
| Q25255 | ETCEYTPDGFIADPNSCQSY | Negative |
| Q25255 | AIYSMSETCEYTPDGFIADP | Negative |
| Q25255 | SAIYSMSETCEYTPDGFIAD | Negative |
| Q25255 | KTS                  | Negative |
| Q25255 | TGCLLLMVAAIGKTS      | Negative |
| Q25255 | AIGKTS               | Negative |
| Q25255 | IGKTS                | Negative |
| Q25255 | LMVAAIGKTS           | Negative |
| Q25255 | LLLMVAAIGKTS         | Negative |
| Q25255 | MSETCEYTPDGFIADPNSCQ | Negative |
| Q25255 | VAAIGKTS             | Negative |
| Q25255 | ELQITTGCLLLMVAAIGKTS | Negative |
| Q25255 | AAIGKTS              | Negative |
| Q25255 | SETCEYTPDGFIADPNSCQS | Negative |
| Q25255 | TS                   | Negative |
| Q25255 | QITTGCLLLMVAAIGKTS   | Negative |
| Q25255 | IYSMSETCEYTPDGFIADPN | Negative |
| Q25255 | MKELQITTGCLLLMVAAIGK | Negative |
| Q25255 | GKTS                 | Negative |
| Q25255 | ITTGCLLLMVAAIGKTS    | Negative |
| Q25255 | LLMVAAIGKTS          | Negative |
| Q25255 | KELQITTGCLLLMVAAIGKT | Negative |
| Q25255 | CLLLMVAAIGKTS        | Negative |
| Q25589 | SVEGSSRMERLLSSGSSSSE | Negative |
| Q25589 | LASSGVQGRSVEGSSRMERL | Negative |
| Q25589 | TMWSLVVVVVVASLASSGVQ | Negative |
| Q25589 | FRTMWSLVVVVVVASLASSG | Negative |
| Q25589 | VEGSSRMERLLSSGSSSSEP | Negative |
| Q25589 | GRSVEGSSRMERLLSSGSSS | Negative |
| Q25589 | EGSSRMERLLSSGSSSSEPL | Negative |
| Q25589 | VVVVVVASLASSGVQGRSVE | Negative |
| Q25589 | WSLVVVVVVASLASSGVQGR | Negative |
| Q25589 | RSVEGSSRMERLLSSGSSSS | Negative |
| Q25589 | VASLASSGVQGRSVEGSSRM | Negative |
| Q25589 | MWSLVVVVVVASLASSGVQG | Negative |
| Q25589 | QGRSVEGSSRMERLLSSGSS | Negative |
| Q25589 | RTMWSLVVVVVVASLASSGV | Negative |
| Q25589 | SLASSGVQGRSVEGSSRMER | Negative |

|        |                       |          |
|--------|-----------------------|----------|
| Q25589 | LVVVVVVASLASSGVQGRSV  | Negative |
| Q25589 | GVQGRSVEGSSRMERLLSSG  | Negative |
| Q25589 | VVASLASSGVQGRSVEGSSR  | Negative |
| Q25589 | ASLASSGVQGRSVEGSSRME  | Negative |
| Q25589 | SFRTMWSLVVVVVVASLASS  | Negative |
| Q25589 | VVVVASLASSGVQGRSVEGS  | Negative |
| Q25589 | ASSGVQGRSVEGSSRMERLL  | Negative |
| Q25589 | VQGRSVEGSSRMERLLSSGS  | Negative |
| Q25589 | VVVASLASSGVQGRSVEGSS  | Negative |
| Q25589 | SSGVQGRSVEGSSRMERLLS  | Negative |
| Q25589 | SGVQGRSVEGSSRMERLLSS  | Negative |
| Q25589 | SLVVVVVVVASLASSGVQGRS | Negative |
| Q25589 | VSFRTMWSLVVVVVVASLAS  | Negative |
| Q25589 | MVSFRTMWSLVVVVVVASLA  | Negative |
| Q26292 | VSASMLIESLVNADGYIKRR  | Negative |
| Q26292 | IESLVNADGYIKRRDGCKVA  | Negative |
| Q26292 | IKRRDGCKVACLIGNEGCDK  | Negative |
| Q26292 | KLLLLLIVSASMLIESLVNA  | Negative |
| Q26292 | LIESLVNADGYIKRRDGCKV  | Negative |
| Q26292 | VNADGYIKRRDGCKVACLIG  | Negative |
| Q26292 | LLLLLIVSASMLIESLVNAD  | Negative |
| Q26292 | ESLVNADGYIKRRDGCKVAC  | Negative |
| Q26292 | DGYIKRRDGCKVACLIGNEG  | Negative |
| Q26292 | MLIESLVNADGYIKRRDGCK  | Negative |
| Q26292 | IVSASMLIESLVNADGYIKR  | Negative |
| Q26292 | YIKRRDGCKVACLIGNEGCD  | Negative |
| Q26292 | KRRDGCKVACLIGNEGCDKE  | Negative |
| Q26292 | MKLLLLLIVSASMLIESLVN  | Negative |
| Q26292 | LVNADGYIKRRDGCKVACLI  | Negative |
| Q26292 | SMLIESLVNADGYIKRRDGC  | Negative |
| Q26292 | LLIVSASMLIESLVNADGYI  | Negative |
| Q26292 | LLIVSASMLIESLVNADGY   | Negative |
| Q26292 | DGCKVACLIGNEGCDKECKA  | Negative |
| Q26292 | LLLLLIVSASMLIESLVNADG | Negative |
| Q26292 | GCKVACLIGNEGCDKECKAY  | Negative |
| Q26292 | NADGYIKRRDGCKVACLIGN  | Negative |
| Q26292 | GYIKRRDGCKVACLIGNEG   | Negative |
| Q26292 | SLVNADGYIKRRDGCKVACL  | Negative |
| Q26292 | RRDGCKVACLIGNEGCDKEC  | Negative |
| Q26292 | SASMLIESLVNADGYIKRRD  | Negative |
| Q26292 | ADGYIKRRDGCKVACLIGNE  | Negative |
| Q26292 | RDGCKVACLIGNEGCDKECK  | Negative |
| Q26292 | ASMLIESLVNADGYIKRRDG  | Negative |
| Q26377 | LPLFLFTLSMCMGQTFQYSR  | Negative |
| Q26377 | RLLLLPLFLFTLSMCMGQTF  | Negative |
| Q26377 | MGQTFQYSRGWTNGKRSFNA  | Negative |

|        |                       |          |
|--------|-----------------------|----------|
| Q26377 | LFLFTLSMCMGQTFQYSRGW  | Negative |
| Q26377 | MCMGQTFQYSRGWTNGKRSF  | Negative |
| Q26377 | RGWTNGKRSFNAAASPLLANG | Negative |
| Q26377 | QTFQYSRGWTNGKRSFNAAAS | Negative |
| Q26377 | GQTFQYSRGWTNGKRSFNAA  | Negative |
| Q26377 | LLPLFLFTLSMCMGQTFQYS  | Negative |
| Q26377 | GWTNGKRSFNAAASPLLANGH | Negative |
| Q26377 | QYSRGWTNGKRSFNAAASPLL | Negative |
| Q26377 | YSRGWTNGKRSFNAAASPLLA | Negative |
| Q26377 | NGKRSFNAAASPLLANGHLHR | Negative |
| Q26377 | MLRLLLLPLFLFTLSMCMGQ  | Negative |
| Q26377 | SRGWTNGKRSFNAAASPLLAN | Negative |
| Q26377 | LRLLLLPLFLFTLSMCMGQT  | Negative |
| Q26377 | FQYSRGWTNGKRSFNAAASPL | Negative |
| Q26377 | TFQYSRGWTNGKRSFNAAASP | Negative |
| Q26377 | TLSMCMGQTFQYSRGWTNGK  | Negative |
| Q26377 | LFTLSMCMGQTFQYSRGWTN  | Negative |
| Q26377 | CMGQTFQYSRGWTNGKRSFN  | Negative |
| Q26377 | WTNGKRSFNAAASPLLANGHL | Negative |
| Q26377 | LLLPLFLFTLSMCMGQTFQ   | Negative |
| Q26377 | PLFLFTLSMCMGQTFQYSRG  | Negative |
| Q26377 | SMCMGQTFQYSRGWTNGKRS  | Negative |
| Q26377 | TNGKRSFNAAASPLLANGHLH | Negative |
| Q26377 | LSMCMGQTFQYSRGWTNGKR  | Negative |
| Q26377 | FTLSMCMGQTFQYSRGWTNG  | Negative |
| Q26377 | FLFTLSMCMGQTFQYSRGWT  | Negative |
| Q26427 | TSALAAPSVVISQDNINNIA  | Negative |
| Q26427 | AAPSVVISQDNINNIAPRVG  | Negative |
| Q26427 | QDNINNIAPRVGNRPISSA   | Negative |
| Q26427 | VATSALAAPSVVISQDNINN  | Negative |
| Q26427 | APSVVISQDNINNIAPRVGN  | Negative |
| Q26427 | FVLVLLVATSALAAPSVVIS  | Negative |
| Q26427 | SALAAPSVVISQDNINNIAP  | Negative |
| Q26427 | DNINNIAPRVGNRPISSAL   | Negative |
| Q26427 | PSVVISQDNINNIAPRVGNG  | Negative |
| Q26427 | VLLVATSALAAPSVVISQDN  | Negative |
| Q26427 | SVVISQDNINNIAPRVGNR   | Negative |
| Q26427 | VVISQDNINNIAPRVGNRGP  | Negative |
| Q26427 | NINNIAPRVGNRPISSALI   | Negative |
| Q26427 | IAPRVGNRPISSALIDRAF   | Negative |
| Q26427 | ATSALAAPSVVISQDNINNI  | Negative |
| Q26427 | LVLLVATSALAAPSVVISQD  | Negative |
| Q26427 | ISQDNINNIAPRVGNRPI    | Negative |
| Q26427 | VLVLLVATSALAAPSVVISQ  | Negative |
| Q26427 | LLVATSALAAPSVVISQDNI  | Negative |
| Q26427 | LAAPSVVISQDNINNIAPRV  | Negative |

|        |                       |          |
|--------|-----------------------|----------|
| Q26427 | SQDNINNIAPRVGNRPIS    | Negative |
| Q26427 | NNIAPRVGNRPISALIDR    | Negative |
| Q26427 | NIAPRVGNRPISALIDRA    | Negative |
| Q26427 | VISQDNINNIAPRVGNRP    | Negative |
| Q26427 | PFVLVLLVATSALAAPSVVI  | Negative |
| Q26427 | MLPFVLVLLVATSALAAPSV  | Negative |
| Q26427 | LVATSALAAPSVVISQDNIN  | Negative |
| Q26427 | INNIAPRVGNRPISALID    | Negative |
| Q26427 | ALAAPSVVISQDNINNIAPR  | Negative |
| Q26636 | ALVALTQAISPLDLIKEEWH  | Negative |
| Q26636 | LTQAISPLDLIKEEWHTYKL  | Negative |
| Q26636 | KEEWHTYKLQHRKNYANEVE  | Negative |
| Q26636 | LVALLALVALTQAISPLDLI  | Negative |
| Q26636 | LLALVALTQAISPLDLIKEE  | Negative |
| Q26636 | SPLDLIKEEWHTYKLQHRKN  | Negative |
| Q26636 | TQAISPLDLIKEEWHTYKLQ  | Negative |
| Q26636 | IKEEWHTYKLQHRKNYANEV  | Negative |
| Q26636 | MRTVLVALLALVALTQAISP  | Negative |
| Q26636 | ALLALVALTQAISPLDLIKE  | Negative |
| Q26636 | ISPLDLIKEEWHTYKLQHRK  | Negative |
| Q26636 | LVALTQAISPLDLIKEEWHT  | Negative |
| Q26636 | EWHTYKLQHRKNYANEVEER  | Negative |
| Q26636 | LIKEEWHTYKLQHRKNYANE  | Negative |
| Q26636 | AISPLDLIKEEWHTYKLQHR  | Negative |
| Q26636 | VALTQAISPLDLIKEEWHTY  | Negative |
| Q26636 | WHTYKLQHRKNYANEVEERF  | Negative |
| Q26636 | PLDLIKEEWHTYKLQHRKNY  | Negative |
| Q26636 | ALTQAISPLDLIKEEWHTYK  | Negative |
| Q26636 | TYKLQHRKNYANEVEERFRM  | Negative |
| Q26636 | QAISPLDLIKEEWHTYKLQH  | Negative |
| Q26636 | HTYKLQHRKNYANEVEERFR  | Negative |
| Q26636 | LDLIKEEWHTYKLQHRKNYA  | Negative |
| Q26636 | DLIKEEWHTYKLQHRKNYAN  | Negative |
| Q26636 | VLVALLALVALTQAISPLDL  | Negative |
| Q26636 | VALLALVALTQAISPLDLIK  | Negative |
| Q26636 | LALVALTQAISPLDLIKEEW  | Negative |
| Q26636 | EEWHTYKLQHRKNYANEVEE  | Negative |
| Q26636 | RTVLVALLALVALTQAISPL  | Negative |
| Q26643 | MTIKNVLKLAAALLGVLALVQ | Negative |
| Q26643 | LALVQAEEQTYRMCVPQKYY  | Negative |
| Q26643 | IKNVLKLAAALLGVLALVQAE | Negative |
| Q26643 | EEQTYRMCVPQKYYEDCLNL  | Negative |
| Q26643 | TYRMCVPQKYYEDCLNLLKD  | Negative |
| Q26643 | KNVLKLAAALLGVLALVQAE  | Negative |
| Q26643 | YRMCVPQKYYEDCLNLLKDP  | Negative |
| Q26643 | MCVPQKYYEDCLNLLKDPSE  | Negative |

|        |                      |          |
|--------|----------------------|----------|
| Q26643 | TIKNVLKLAALLGVLALVQA | Negative |
| Q26643 | LLGVLALVQAEEQTYRMCVP | Negative |
| Q26643 | VQAEEQTYRMCVPQKYYEDC | Negative |
| Q26643 | AEEQTYRMCVPQKYYEDCLN | Negative |
| Q26643 | ALLGVLALVQAEEQTYRMCV | Negative |
| Q26643 | LVQAEEQTYRMCVPQKYYED | Negative |
| Q26643 | VPQKYYEDCLNLLKDPSEAG | Negative |
| Q26643 | LGVLALVQAEEQTYRMCVPQ | Negative |
| Q26643 | GVLALVQAEEQTYRMCVPQK | Negative |
| Q26643 | VLALVQAEEQTYRMCVPQKY | Negative |
| Q26643 | RMCVPQKYYEDCLNLLKDPS | Negative |
| Q26643 | LAALLGVLALVQAEEQTYRM | Negative |
| Q26643 | QTYRMCVPQKYYEDCLNLLK | Negative |
| Q26643 | EQTYRMCVPQKYYEDCLNLL | Negative |
| Q26643 | ALVQAEEQTYRMCVPQKYYE | Negative |
| Q26643 | VLKLAALLGVLALVQAEEQT | Negative |
| Q26643 | QAEEQTYRMCVPQKYYEDCL | Negative |
| Q26643 | AALLGVLALVQAEEQTYRMC | Negative |
| Q26643 | CVPQKYYEDCLNLLKDPSEA | Negative |
| Q26643 | KLAALLGVLALVQAEEQTYR | Negative |
| Q26643 | NVLKLAALLGVLALVQAEEQ | Negative |
| Q27081 | GVLFPKTRNDNECTARGGLK | Negative |
| Q27081 | ASATLGNKVSRVGVLPKTR  | Negative |
| Q27081 | LGNKVSRVGVLPKTRNDNE  | Negative |
| Q27081 | CVITLALASATLGNKVSRV  | Negative |
| Q27081 | TWICVITLALASATLGNKV  | Negative |
| Q27081 | RVGVLPKTRNDNECTARGG  | Negative |
| Q27081 | FPKTRNDNECTARGGLKGSC | Negative |
| Q27081 | MTWICVITLALASATLGNK  | Negative |
| Q27081 | VITLALASATLGNKVSRVG  | Negative |
| Q27081 | NKVS RVGVLPKTRNDNECT | Negative |
| Q27081 | VLFPKTRNDNECTARGGLKG | Negative |
| Q27081 | ALASATLGNKVSRVGVLPK  | Negative |
| Q27081 | TLFALASATLGNKVSRVGV  | Negative |
| Q27081 | SRVGVLPKTRNDNECTARG  | Negative |
| Q27081 | FALASATLGNKVSRVGVLP  | Negative |
| Q27081 | SATLGNKVSRVGVLPKTRN  | Negative |
| Q27081 | PKTRNDNECTARGGLKGSC  | Negative |
| Q27081 | VGVLFPKTRNDNECTARGGL | Negative |
| Q27081 | KVSRVGVLPKTRNDNECTA  | Negative |
| Q27081 | KTRNDNECTARGGLKGCKS  | Negative |
| Q27081 | WICVITLALASATLGNKVS  | Negative |
| Q27081 | LASATLGNKVSRVGVLPKT  | Negative |
| Q27081 | ITLALASATLGNKVSRVGV  | Negative |
| Q27081 | VSRVGVLPKTRNDNECTAR  | Negative |
| Q27081 | LFPKTRNDNECTARGGLKGS | Negative |

|        |                        |          |
|--------|------------------------|----------|
| Q27081 | GNKVS RVGVLPKTRNDNEC   | Negative |
| Q27081 | ICVITL FALASATLG NKVSR | Negative |
| Q27081 | ATLG NKVSRGVLPKTRND    | Negative |
| Q27081 | TLG NKVSRGVLPKTRNDN    | Negative |
| Q27270 | GHLGGHQTGHQGGQQGGHLG   | Negative |
| Q27270 | VICLILVVAVSAAPDHH DGH  | Negative |
| Q27270 | CLILVVAVSAAPDHH DGH LG | Negative |
| Q27270 | QTGHQGGQQGGHLGGQQGGH   | Negative |
| Q27270 | TGHQGGQQGGHLGGQQGGHL   | Negative |
| Q27270 | TFVICLILVVAVSAAPDHH D  | Negative |
| Q27270 | KTFVICLILVVAVSAAPDHH   | Negative |
| Q27270 | ICLILVVAVSAAPDHH DGH L | Negative |
| Q27270 | HLGGHQTGHQGGQQGGHLGG   | Negative |
| Q27270 | SAAPDHH DGH LGGHQTGHQG | Negative |
| Q27270 | GGHQTGHQGGQQGGHLGGQQ   | Negative |
| Q27270 | AVSAAPDHH DGH LGGHQTGH | Negative |
| Q27270 | DGHLGGHQTGHQGGQQGGHL   | Negative |
| Q27270 | VAVSAAPDHH DGH LGGHQTG | Negative |
| Q27270 | LILVVAVSAAPDHH DGH LGG | Negative |
| Q27270 | GHQTGHQGGQQGGHLGGQQG   | Negative |
| Q27270 | VSAAPDHH DGH LGGHQTGHQ | Negative |
| Q27270 | ILVVAVSAAPDHH DGH LGGH | Negative |
| Q27270 | MKTFVICLILVVAVSAAPDH   | Negative |
| Q27270 | HHDGHLGGHQTGHQGGQQGG   | Negative |
| Q27270 | AAPDHH DGH LGGHQTGHQGG | Negative |
| Q27270 | HQTGHQGGQQGGHLGGQQGG   | Negative |
| Q27270 | PDHHDGHLGGHQTGHQGGQQ   | Negative |
| Q27270 | LGGHQTGHQGGQQGGHLGGQ   | Negative |
| Q27270 | DHHDGHLGGHQTGHQGGQQG   | Negative |
| Q27270 | LVVAVSAAPDHH DGH LGGHQ | Negative |
| Q27270 | VVAVSAAPDHH DGH LGGHQT | Negative |
| Q27270 | HDGHLGGHQTGHQGGQQGGH   | Negative |
| Q27270 | APDHH DGH LGGHQTGHQGGQ | Negative |
| Q27441 | SCMAVLSVRADNSEMLAPP    | Negative |
| Q27441 | LLSCMAVLSVRADNSEMLA    | Negative |
| Q27441 | MAVLSVRADNSEMLAPPRP    | Negative |
| Q27441 | EMLAPPRPEEFTSAQQLRQ    | Negative |
| Q27441 | LLSCMAVLSVRADNSEMLAP   | Negative |
| Q27441 | VLSVRADNSEMLAPPRPEE    | Negative |
| Q27441 | CMAVLSVRADNSEMLAPPR    | Negative |
| Q27441 | LSVRADNSEMLAPPRPEEF    | Negative |
| Q27441 | VRADNSEMLAPPRPEEFTS    | Negative |
| Q27441 | ADNSEMLAPPRPEEFTSAQ    | Negative |
| Q27441 | AVLSVRADNSEMLAPPRPE    | Negative |
| Q27441 | RADNSEMLAPPRPEEFTSA    | Negative |
| Q27441 | MQRVILVLLSCMAVLSVR     | Negative |

|        |                      |          |
|--------|----------------------|----------|
| Q27441 | SVRADNSEMLAPPPRPEEFT | Negative |
| Q27441 | ILVVLLLSMAVLSVRADNS  | Negative |
| Q27441 | VILVVLLLSMAVLSVRADN  | Negative |
| Q27441 | DNSEMLAPPPRPEEFTSAQQ | Negative |
| Q27441 | LAPPPRPEEFTSAQQLRQYL | Negative |
| Q27441 | NSEMLAPPPRPEEFTSAQQL | Negative |
| Q27441 | QRVILVVLLLSMAVLSVRA  | Negative |
| Q27441 | LSCMAVLSVRADNSEMLAPP | Negative |
| Q27441 | SEMLAPPPRPEEFTSAQQLR | Negative |
| Q27441 | VLLLSMAVLSVRADNSEML  | Negative |
| Q27441 | LVVVLLLSMAVLSVRADNSE | Negative |
| Q27441 | APPPRPEEFTSAQQLRQYLA | Negative |
| Q27441 | MLAPPPRPEEFTSAQQLRQY | Negative |
| Q27441 | RVILVVLLLSMAVLSVRAD  | Negative |
| Q27441 | PPRPEEFTSAQQLRQYLAAL | Negative |
| Q27441 | PPPRPEEFTSAQQLRQYLAA | Negative |
| Q27908 | TALCVVIPLCYGASMFKHDH | Negative |
| Q27908 | MDNGVRYPNGDGICKQLNET | Negative |
| Q27908 | LCYGASMFKHDHYMDNGVRY | Negative |
| Q27908 | CVVIPLCYGASMFKHDHYMD | Negative |
| Q27908 | HLTALCVVIPLCYGASMFKH | Negative |
| Q27908 | HYMDNGVRYPNGDGICKQLN | Negative |
| Q27908 | NGVRYPNGDGICKQLNETKC | Negative |
| Q27908 | MFKHDHYMDNGVRYPNGDGI | Negative |
| Q27908 | YLHLTALCVVIPLCYGASMF | Negative |
| Q27908 | SMFKHDHYMDNGVRYPNGDG | Negative |
| Q27908 | ASMFKHDHYMDNGVRYPNGD | Negative |
| Q27908 | GVRYPNGDGICKQLNETKCD | Negative |
| Q27908 | DNGVRYPNGDGICKQLNETK | Negative |
| Q27908 | VVIPLCYGASMFKHDHYMDN | Negative |
| Q27908 | PLCYGASMFKHDHYMDNGVR | Negative |
| Q27908 | DHYMDNGVRYPNGDGICKQL | Negative |
| Q27908 | FKHDHYMDNGVRYPNGDGIC | Negative |
| Q27908 | LTALCVVIPLCYGASMFKHD | Negative |
| Q27908 | VIPLCYGASMFKHDHYMDNG | Negative |
| Q27908 | KHDHYMDNGVRYPNGDGICK | Negative |
| Q27908 | HDHYMDNGVRYPNGDGICKQ | Negative |
| Q27908 | MYLHLTALCVVIPLCYGASM | Negative |
| Q27908 | CYGASMFKHDHYMDNGVRYP | Negative |
| Q27908 | YGASMFKHDHYMDNGVRYPN | Negative |
| Q27908 | GASMFKHDHYMDNGVRYPNG | Negative |
| Q27908 | ALCVVIPLCYGASMFKHDHY | Negative |
| Q27908 | IPLCYGASMFKHDHYMDNGV | Negative |
| Q27908 | YMDNGVRYPNGDGICKQLNE | Negative |
| Q27908 | LCVVIPLCYGASMFKHDHYM | Negative |
| Q27967 | GFPVYDYDPASLKEALSASV | Negative |

|        |                      |          |
|--------|----------------------|----------|
| Q27967 | MEKMAMKMLVIFVLGMNHWT | Negative |
| Q27967 | CTGFPVYDYDPASLKEALSA | Negative |
| Q27967 | LGMNHWTCTGFPVYDYDPAS | Negative |
| Q27967 | KMAMKMLVIFVLGMNHWTCT | Negative |
| Q27967 | GMNHWTCTGFPVYDYDPASL | Negative |
| Q27967 | MKMLVIFVLGMNHWTCTGFP | Negative |
| Q27967 | MNHWTCTGFPVYDYDPASLK | Negative |
| Q27967 | FPVYDYDPASLKEALSASVA | Negative |
| Q27967 | IFVLGMNHWTCTGFPVYDYD | Negative |
| Q27967 | TCTGFPVYDYDPASLKEALS | Negative |
| Q27967 | FVLGMNHWTCTGFPVYDYDP | Negative |
| Q27967 | EKMAMKMLVIFVLGMNHWTC | Negative |
| Q27967 | HWTCTGFPVYDYDPASLKEA | Negative |
| Q27967 | AMKMLVIFVLGMNHWTCTGF | Negative |
| Q27967 | VIFVLGMNHWTCTGFPVYDY | Negative |
| Q27967 | KMLVIFVLGMNHWTCTGFPV | Negative |
| Q27967 | MLVIFVLGMNHWTCTGFPVY | Negative |
| Q27967 | NHWTCTGFPVYDYDPASLKE | Negative |
| Q27967 | YDYDPASLKEALSASVAKVN | Negative |
| Q27967 | MAMKMLVIFVLGMNHWTCTG | Negative |
| Q27967 | YDPASLKEALSASVAKVNSQ | Negative |
| Q27967 | WTCTGFPVYDYDPASLKEAL | Negative |
| Q27967 | TGFPVYDYDPASLKEALSAS | Negative |
| Q27967 | VLGMNHWTCTGFPVYDYDPA | Negative |
| Q27967 | DPASLKEALSASVAKVNSQS | Negative |
| Q27967 | VYDYDPASLKEALSASVAKV | Negative |
| Q27967 | DYDPASLKEALSASVAKVNS | Negative |
| Q27967 | PVYDYDPASLKEALSASVAK | Negative |
| Q28042 | FSRPGPASILPRDLDPFLCT | Negative |
| Q28042 | YFTNWAFSRPGPASILPRDL | Negative |
| Q28042 | WAFSRPGPASILPRDLDPFL | Negative |
| Q28042 | AFSRPGPASILPRDLDPFLC | Negative |
| Q28042 | LVCYFTNWAFSRPGPASILP | Negative |
| Q28042 | NWAFSRPGPASILPRDLDPF | Negative |
| Q28042 | CYFTNWAFSRPGPASILPRD | Negative |
| Q28042 | LLLCVGLLLVLKHHDGAAHK | Negative |
| Q28042 | LLVLKHHDGAAHKLVCYFT  | Negative |
| Q28042 | VLKHHDGAAHKLVCYFTNWA | Negative |
| Q28042 | GLLLVLKHHDGAAHKLVCYF | Negative |
| Q28042 | LKHHDGAAHKLVCYFTNWAF | Negative |
| Q28042 | KHHDGAAHKLVCYFTNWAFS | Negative |
| Q28042 | AAHKLVCYFTNWAFSRPGPA | Negative |
| Q28042 | VGLLLVLKHHDGAAHKLVCY | Negative |
| Q28042 | GAAHKLVCYFTNWAFSRPGP | Negative |
| Q28042 | LVLKHHDGAAHKLVCYFTNW | Negative |
| Q28042 | AHKLVCYFTNWAFSRPGPAS | Negative |



|        |                       |          |
|--------|-----------------------|----------|
| Q28042 | FTNWAFSRPGPASILPRDLD  | Negative |
| Q28042 | LCVGLLLVLKHHDGAAHKL V | Negative |
| Q28042 | DGAAHKLVCYFTNWAFSRPG  | Negative |
| Q28042 | LLCVGLLLVLKHHDGAAHKL  | Negative |
| Q28042 | VCYFTNWAFSRPGPASILPR  | Negative |
| Q28042 | KLVCYFTNWAFSRPGPASIL  | Negative |
| Q28042 | LLVLKHHDGAAHKLVCYFTN  | Negative |
| Q28042 | HHDGAAHKLVCYFTNWAFSR  | Negative |
| Q28042 | HKLVCYFTNWAFSRPGPASI  | Negative |
| Q28042 | TNWAFSRPGPASILPRDLDP  | Negative |
| Q28042 | HDGAAHKLVCYFTNWAFSRP  | Negative |
| Q28085 | KEPPPRKETEILSGSWTEQT  | Negative |
| Q28085 | KETEILSGSWTEQTYQEGTQ  | Negative |
| Q28085 | LWTVCAEDCKEPPPRKETE   | Negative |
| Q28085 | EDCKEPPPRKETEILSGSWT  | Negative |
| Q28085 | PPRKETEILSGSWTEQTYQE  | Negative |
| Q28085 | VWLVLWTVCAEDCKEPPPR   | Negative |
| Q28085 | RFPKIVWLVLWTVCAEDC    | Negative |
| Q28085 | VLWTVCAEDCKEPPPRKET   | Negative |
| Q28085 | FPAKIVWLVLWTVCAEDCK   | Negative |
| Q28085 | EPPPRKETEILSGSWTEQTY  | Negative |
| Q28085 | WLVLWTVCAEDCKEPPPRK   | Negative |
| Q28085 | IVWLVLWTVCAEDCKEPPP   | Negative |
| Q28085 | VAEDCKEPPPRKETEILSGS  | Negative |
| Q28085 | CKEPPPRKETEILSGSWTEQ  | Negative |
| Q28085 | WTVCAEDCKEPPPRKETEI   | Negative |
| Q28085 | TVCVAEDCKEPPPRKETEIL  | Negative |
| Q28085 | AKIVWLVLWTVCAEDCKEP   | Negative |
| Q28085 | TEILSGSWTEQTYQEGTQAT  | Negative |
| Q28085 | PPPRKETEILSGSWTEQTYQ  | Negative |
| Q28085 | RKETEILSGSWTEQTYQEGT  | Negative |
| Q28085 | DCKEPPPRKETEILSGSWTE  | Negative |
| Q28085 | PRKETEILSGSWTEQTYQEG  | Negative |
| Q28085 | AEDCKEPPPRKETEILSGSW  | Negative |
| Q28085 | VCVAEDCKEPPPRKETEILS  | Negative |
| Q28085 | MRFPKIVWLVLWTVCAED    | Negative |
| Q28085 | CVAEDCKEPPPRKETEILSG  | Negative |
| Q28085 | LVLWTVCAEDCKEPPPRKE   | Negative |
| Q28085 | ETEILSGSWTEQTYQEGTQA  | Negative |
| Q28085 | KIVWLVLWTVCAEDCKEPP   | Negative |
| Q28388 | ILPRRPHALHMGPGDPNFDE  | Negative |
| Q28388 | PRRPHALHMGPGDPNFDEKL  | Negative |
| Q28388 | MNLLLLAMGLILPRRPHALH  | Negative |
| Q28388 | LHMGPDPNFDEKL VKGKWF  | Negative |
| Q28388 | AMGLILPRRPHALHMGPGDP  | Negative |
| Q28388 | GDPNFDEKL VKGKWFSVALA | Negative |

|        |                         |          |
|--------|-------------------------|----------|
| Q28388 | PNFDEKLVKGKWFSVALASN    | Negative |
| Q28388 | LAMGLILPRRPHALHMGP GD   | Negative |
| Q28388 | DPNFDEKLVKGKWFSVALAS    | Negative |
| Q28388 | FDEKLVKGKWFSVALASNEP    | Negative |
| Q28388 | ALHMGP GD PNFDEKLVKGKW  | Negative |
| Q28388 | LLAMGLILPRRPHALHMGP G   | Negative |
| Q28388 | EKLVKGKWFSVALASNEPKF    | Negative |
| Q28388 | HALHMGP GD PNFDEKLVKGK  | Negative |
| Q28388 | PGDPNFDEKLVKGKWFSVAL    | Negative |
| Q28388 | RRPHALHMGP GD PNFDEKLV  | Negative |
| Q28388 | RPHALHMGP GD PNFDEKLVK  | Negative |
| Q28388 | HMGP GD PNFDEKLVKGKWFS  | Negative |
| Q28388 | GLILPRRPHALHMGP GD PNF  | Negative |
| Q28388 | NLLLLAMGLILPRRPHALHM    | Negative |
| Q28388 | MGLILPRRPHALHMGP GD PN  | Negative |
| Q28388 | LILPRRPHALHMGP GD PNF D | Negative |
| Q28388 | PHALHMGP GD PNFDEKLVKG  | Negative |
| Q28388 | DEKLVKGKWFSVALASNEPK    | Negative |
| Q28388 | MGP GD PNFDEKLVKGKWFSV  | Negative |
| Q28388 | LLLLAMGLILPRRPHALHMG    | Negative |
| Q28388 | GPGDPNFDEKLVKGKWFSVA    | Negative |
| Q28388 | LPRRPHALHMGP GD PNFDEK  | Negative |
| Q28388 | NFDEKLVKGKWFSVALASNE    | Negative |
| Q28631 | SRLVPLGAVLLLGLLLLLLEL   | Negative |
| Q28631 | PPVTGTGADKPGVCPQLSAD    | Negative |
| Q28631 | LGLLLLLLELPPVTGTGADKP   | Negative |
| Q28631 | ASRLVPLGAVLLLGLLLLLLE   | Negative |
| Q28631 | GAVLLLGLLLLLLELPPVTGT   | Negative |
| Q28631 | VTGTGADKPGVCPQLSADLN    | Negative |
| Q28631 | PASRLVPLGAVLLLGLLLLLL   | Negative |
| Q28631 | VPLGAVLLLGLLLLLLELPPV   | Negative |
| Q28631 | TGADKPGVCPQLSADLNCTQ    | Negative |
| Q28631 | MPASRLVPLGAVLLLGLLLLL   | Negative |
| Q28631 | RLVPLGAVLLLGLLLLLLELP   | Negative |
| Q28631 | LGAVLLLGLLLLLLELPPVTG   | Negative |
| Q28631 | LLELPPVTGTGADKPGVCPQ    | Negative |
| Q28631 | LVPLGAVLLLGLLLLLLELPP   | Negative |
| Q28631 | PLGAVLLLGLLLLLLELPPVT   | Negative |
| Q28631 | GADKPGVCPQLSADLNCTQD    | Negative |
| Q28631 | GTGADKPGVCPQLSADLNCT    | Negative |
| Q28631 | TGTGADKPGVCPQLSADLNC    | Negative |
| Q28631 | GLLLLLLELPPVTGTGADKPG   | Negative |
| Q28631 | LPPVTGTGADKPGVCPQLSA    | Negative |
| Q28631 | LLLLLELPPVTGTGADKPGVC   | Negative |
| Q28631 | LLGLLLLLLELPPVTGTGAD    | Negative |
| Q28631 | LELPPVTGTGADKPGVCPQL    | Negative |

|        |                       |          |
|--------|-----------------------|----------|
| Q28631 | PVTGTGADKPGVCPQLSADL  | Negative |
| Q28631 | ELPPVTGTGADKPGVCPQLS  | Negative |
| Q28631 | VLLLGLLLLLLELPPVTGTGA | Negative |
| Q28631 | LLLELPPVTGTGADKPGVCP  | Negative |
| Q28631 | AVLLLGLLLLLLELPPVTGTG | Negative |
| Q28631 | LLLLLELPPVTGTGADKPGV  | Negative |
| Q28862 | ILLSILGMACALSMKNLNRR  | Negative |
| Q28862 | RAKLEDSEENG VFKYRPQYY | Negative |
| Q28862 | ALSMKNLNRRAKLEDSEENG  | Negative |
| Q28862 | SMKNLNRRAKLEDSEENG V  | Negative |
| Q28862 | GMACALSMKNLNRRAKLED S | Negative |
| Q28862 | LGMACALSMKNLNRRAKLED  | Negative |
| Q28862 | TVLILLSILGMACALSMKNL  | Negative |
| Q28862 | SILGMACALSMKNLNRRAKL  | Negative |
| Q28862 | MACALSMKNLNRRAKLEDSE  | Negative |
| Q28862 | DSEENG VFKYRPQYYVYKHG | Negative |
| Q28862 | RAKLEDSEENG VFKYRPQY  | Negative |
| Q28862 | LILLSILGMACALSMKNLNR  | Negative |
| Q28862 | NLNRRAKLEDSEENG VFKYR | Negative |
| Q28862 | EDSEENG VFKYRPQYYVYKH | Negative |
| Q28862 | AKLEDSEENG VFKYRPQYYV | Negative |
| Q28862 | CALSMKNLNRRAKLEDSEEN  | Negative |
| Q28862 | LLSILGMACALSMKNLNRR A | Negative |
| Q28862 | LNRRAKLEDSEENG VFKYRP | Negative |
| Q28862 | LSMKNLNRRAKLEDSEENG V | Negative |
| Q28862 | MKNLNRRAKLEDSEENG VFK | Negative |
| Q28862 | LSILGMACALSMKNLNRRAK  | Negative |
| Q28862 | ACALSMKNLNRRAKLEDSEE  | Negative |
| Q28862 | KLEDSEENG VFKYRPQYYVY | Negative |
| Q28862 | KNLNRRAKLEDSEENG VFKY | Negative |
| Q28862 | ILGMACALSMKNLNRRAKLE  | Negative |
| Q28862 | MKTVLILLSILGMACALSMK  | Negative |
| Q28862 | LEDSEENG VFKYRPQYYVYK | Negative |
| Q28862 | NRRAKLEDSEENG VFKYRPQ | Negative |
| Q28862 | VLILLSILGMACALSMKNLN  | Negative |
| Q28989 | AVPAFPRQPGTPGVASLSLE  | Negative |
| Q28989 | LLKMSSAVPAFPRQPGTPGV  | Negative |
| Q28989 | VPAFPRQPGTPGVASLSLET  | Negative |
| Q28989 | MVLILCLKMSSAVPAFPRQ   | Negative |
| Q28989 | PAFPRQPGTPGVASLSLET M | Negative |
| Q28989 | MPALKIPLFKMKDMVLILCL  | Negative |
| Q28989 | FKMKDMVLILCLKMSSAVP   | Negative |
| Q28989 | MKDMVLILCLKMSSAVPAF   | Negative |
| Q28989 | KMKDMVLILCLKMSSAVPA   | Negative |
| Q28989 | VLILCLKMSSAVPAFPRQP   | Negative |
| Q28989 | CLKMSSAVPAFPRQPGTPG   | Negative |

|        |                      |          |
|--------|----------------------|----------|
| Q28989 | AFPRQPGTPGVASLSLETMR | Negative |
| Q28989 | FPRQPGTPGVASLSLETMRQ | Negative |
| Q28989 | ALKIPLFKMKDMVLILCLLK | Negative |
| Q28989 | LFKMKDMVLILCLLKMSAV  | Negative |
| Q28989 | KIPLFKMKDMVLILCLLKMS | Negative |
| Q28989 | SAVPAFPRQPGTPGVASLSL | Negative |
| Q28989 | SSAVPAFPRQPGTPGVASLS | Negative |
| Q28989 | ILCLLKMSAVPAFPRQPGT  | Negative |
| Q28989 | PLFKMKDMVLILCLLKMSA  | Negative |
| Q28989 | IPLFKMKDMVLILCLLKMS  | Negative |
| Q28989 | PALKIPLFKMKDMVLILCLL | Negative |
| Q28989 | DMVLILCLLKMSAVPAFPR  | Negative |
| Q28989 | LKMSSAVPAFPRQPGTPGVA | Negative |
| Q28989 | LCLLKMSAVPAFPRQPGTP  | Negative |
| Q28989 | LILCLLKMSAVPAFPRQPG  | Negative |
| Q28989 | MSSAVPAFPRQPGTPGVASL | Negative |
| Q28989 | KMSSAVPAFPRQPGTPGVAS | Negative |
| Q28989 | LKIPLFKMKDMVLILCLLK  | Negative |
| Q29143 | IRANSLENLSRLVPSLCLLP | Negative |
| Q29143 | VGMTSSEKLLDRIRANSLEN | Negative |
| Q29143 | DRIRANSLENLSRLVPSLCL | Negative |
| Q29143 | FTIHALCLALSLVGMTSSEK | Negative |
| Q29143 | EKLLDRIRANSLENLSRLVP | Negative |
| Q29143 | LLDRIRANSLENLSRLVPSL | Negative |
| Q29143 | SSEKLLDRIRANSLENLSRL | Negative |
| Q29143 | MKFTIHALCLALSLVGMTSS | Negative |
| Q29143 | LSLVGMTSSEKLLDRIRANS | Negative |
| Q29143 | KFTIHALCLALSLVGMTSSE | Negative |
| Q29143 | ANSLENLSRLVPSLCLLPSG | Negative |
| Q29143 | LDRIRANSLENLSRLVPSLC | Negative |
| Q29143 | ALSLVGMTSSEKLLDRIRAN | Negative |
| Q29143 | TIHALCLALSLVGMTSSEKL | Negative |
| Q29143 | LCLALSLVGMTSSEKLLDRI | Negative |
| Q29143 | MTSSEKLLDRIRANSLENLS | Negative |
| Q29143 | CLALSLVGMTSSEKLLDRIR | Negative |
| Q29143 | SEKLLDRIRANSLENLSRLV | Negative |
| Q29143 | LALSLVGMTSSEKLLDRIRA | Negative |
| Q29143 | ALCLALSLVGMTSSEKLLDR | Negative |
| Q29143 | RIRANSLENLSRLVPSLCLL | Negative |
| Q29143 | LVGMTSSEKLLDRIRANSLE | Negative |
| Q29143 | SLVGMTSSEKLLDRIRANSL | Negative |
| Q29143 | NSLENLSRLVPSLCLLPSGR | Negative |
| Q29143 | TSSEKLLDRIRANSLENLSR | Negative |
| Q29143 | GMTSSEKLLDRIRANSLENL | Negative |
| Q29143 | IHALCLALSLVGMTSSEKLL | Negative |
| Q29143 | RANSLENLSRLVPSLCLLPS | Negative |

|        |                       |          |
|--------|-----------------------|----------|
| Q29143 | KLLDRIRANSLENLSRLVPS  | Negative |
| Q29411 | VLLQSCAAYKLVCYYTSWSQ  | Negative |
| Q29411 | RVAQTGFVALVLLQSCAAYK  | Negative |
| Q29411 | AYKLVCYYTSWSQYREGDGS  | Negative |
| Q29411 | AQTGFVALVLLQSCAAYKLV  | Negative |
| Q29411 | LRVAQTGFVALVLLQSCAAY  | Negative |
| Q29411 | TGFVALVLLQSCAAYKLVCY  | Negative |
| Q29411 | FVALVLLQSCAAYKLVCYYT  | Negative |
| Q29411 | YTSWSQYREGDGSCFPDAID  | Negative |
| Q29411 | LLQSCAAYKLVCYYTSWSQY  | Negative |
| Q29411 | CAAYKLVCYYTSWSQYREGD  | Negative |
| Q29411 | SWSQYREGDGSCFPDAIDPF  | Negative |
| Q29411 | GFVALVLLQSCAAYKLVCYY  | Negative |
| Q29411 | MGLRVAQTGFVALVLLQSCA  | Negative |
| Q29411 | LVLLQSCAAYKLVCYYTSWS  | Negative |
| Q29411 | GLRVAQTGFVALVLLQSCAA  | Negative |
| Q29411 | LQSCAAYKLVCYYTSWSQYR  | Negative |
| Q29411 | KLVCYYTSWSQYREGDGSCF  | Negative |
| Q29411 | YYTSWSQYREGDGSCFPDAI  | Negative |
| Q29411 | VALVLLQSCAAYKLVCYYTS  | Negative |
| Q29411 | VCYYTSWSQYREGDGSCFPD  | Negative |
| Q29411 | CYYTSWSQYREGDGSCFPDA  | Negative |
| Q29411 | QSCAAYKLVCYYTSWSQYRE  | Negative |
| Q29411 | SCAAYKLVCYYTSWSQYREG  | Negative |
| Q29411 | TSWSQYREGDGSCFPDAIDP  | Negative |
| Q29411 | VAQTGFVALVLLQSCAAYKL  | Negative |
| Q29411 | LVCYYTSWSQYREGDGSCFP  | Negative |
| Q29411 | YKLVCYYTSWSQYREGDGSC  | Negative |
| Q29411 | AAAYKLVCYYTSWSQYREGDG | Negative |
| Q29411 | ALVLLQSCAAYKLVCYYTSW  | Negative |
| Q29616 | AFVSETAAVHHESEHSKCPL  | Negative |
| Q29616 | FHSLLLLCLAGLAFVSETAA  | Negative |
| Q29616 | FVSETAAVHHESEHSKCPLM  | Negative |
| Q29616 | TAAVHHESEHSKCPLMVKVL  | Negative |
| Q29616 | AVHHESEHSKCPLMVKVLD   | Negative |
| Q29616 | VSETAAVHHESEHSKCPLMV  | Negative |
| Q29616 | ESEHSKCPLMVKVLDVAVRGR | Negative |
| Q29616 | HESEHSKCPLMVKVLDVAVRG | Negative |
| Q29616 | SETAAVHHESEHSKCPLMVK  | Negative |
| Q29616 | SEHSKCPLMVKVLDVAVRGRP | Negative |
| Q29616 | SKCPLMVKVLDVAVRGRPAVN | Negative |
| Q29616 | EHSKCPLMVKVLDVAVRGRPA | Negative |
| Q29616 | LAGLAFVSETAAVHHESEHS  | Negative |
| Q29616 | VHHESEHSKCPLMVKVLDVAV | Negative |
| Q29616 | SLLLLCLAGLAFVSETAAVH  | Negative |
| Q29616 | MAFHSLLLLCLAGLAFVSET  | Negative |

|        |                        |          |
|--------|------------------------|----------|
| Q29616 | HSKCPLMVKVLD AVRGRPAV  | Negative |
| Q29616 | AAVHHESEHSKCPLMVKULD   | Negative |
| Q29616 | AFHSLLLLCLAGLAFVSETA   | Negative |
| Q29616 | LAFVSETAAVHHESEHSKCP   | Negative |
| Q29616 | ETA AVHHESEHSKCPLMVKV  | Negative |
| Q29616 | HHESEHSKCPLMVKVLD AVR  | Negative |
| Q29616 | AGLAFVSETAAVHHESEHSK   | Negative |
| Q29616 | HSLLLLCLAGLAFVSETAAV   | Negative |
| Q29616 | CLAGLAFVSETAAVHHESEH   | Negative |
| Q29616 | LLLCLAGLAFVSETAAVHH    | Negative |
| Q29616 | GLAFVSETAAVHHESEHSKC   | Negative |
| Q29616 | LCLAGLAFVSETAAVHHESE   | Negative |
| Q29616 | LLLCLAGLAFVSETAAVHHE   | Negative |
| Q2A783 | AIAQLETTCSQGFGQYQQQQ   | Negative |
| Q2A783 | TCSQGFGQYQQQQQPGQRQL   | Negative |
| Q2A783 | ILALLALTATTAIAQLETTTC  | Negative |
| Q2A783 | LALLALTATTAIAQLETTCS   | Negative |
| Q2A783 | TTAIAQLETTCSQGFGQYQQ   | Negative |
| Q2A783 | IAQLETTCSQGFGQYQQQQQ   | Negative |
| Q2A783 | TATTAIAQLETTCSQGFGQY   | Negative |
| Q2A783 | MKVFILALLALTATTAIAQL   | Negative |
| Q2A783 | TAIAQLETTCSQGFGQYQQQ   | Negative |
| Q2A783 | CSQGFGQYQQQQQPGQRQLL   | Negative |
| Q2A783 | GFGQYQQQQQPGQRQLLEQM   | Negative |
| Q2A783 | ATTAIAQLETTCSQGFGQYQ   | Negative |
| Q2A783 | LLALTATTAIAQLETTCSQG   | Negative |
| Q2A783 | ALTATTAIAQLETTCSQGFG   | Negative |
| Q2A783 | ETTCSQGFGQYQQQQQPGQR   | Negative |
| Q2A783 | QYQQQQQPGQRQLLEQMKPC   | Negative |
| Q2A783 | FGQYQQQQQPGQRQLLEQMK   | Negative |
| Q2A783 | TTCSQGFGQYQQQQQPGQRQ   | Negative |
| Q2A783 | VFILALLALTATTAIAQLET   | Negative |
| Q2A783 | SQGFGQYQQQQQPGQRQLLE   | Negative |
| Q2A783 | ALLALTATTAIAQLETTCSQ   | Negative |
| Q2A783 | KVFILALLALTATTAIAQLE   | Negative |
| Q2A783 | GQYQQQQQPGQRQLLEQMKP   | Negative |
| Q2A783 | LETTCSQGFGQYQQQQQPGQ   | Negative |
| Q2A783 | AQLETTCSQGFGQYQQQQQP   | Negative |
| Q2A783 | QGFGQYQQQQQPGQRQLLEQ   | Negative |
| Q2A783 | LTATTAIAQLETTCSQGFGQ   | Negative |
| Q2A783 | LALTATTAIAQLETTCSQGF   | Negative |
| Q2A783 | QLETTCSQGFGQYQQQQQPG   | Negative |
| Q2FV52 | AAGTGHQAHA AEVNVDQ AHL | Negative |
| Q2FV52 | AVALGVTGYAAGTGHQAHA A  | Negative |
| Q2FV52 | ALGVTGYAAGTGHQAHA AEV  | Negative |
| Q2FV52 | TIMASSLAVALGVTGYAAGT   | Negative |

|        |                      |          |
|--------|----------------------|----------|
| Q2FV52 | HQAHAAEVNVDQAHLVDLAH | Negative |
| Q2FV52 | MASSLAVALGVTGYAAGTGH | Negative |
| Q2FV52 | SSLAVALGVTGYAAGTGHQA | Negative |
| Q2FV52 | LGVTGYAAGTGHQAHAAEVN | Negative |
| Q2FV52 | YAAGTGHQAHAAEVNVDQAH | Negative |
| Q2FV52 | AEVNVDQAHLVDLAHNHQDQ | Negative |
| Q2FV52 | AGTGHQAHAAEVNVDQAHLV | Negative |
| Q2FV52 | TGYAAGTGHQAHAAEVNVDQ | Negative |
| Q2FV52 | QAHAAEVNVDQAHLVDLAHN | Negative |
| Q2FV52 | KKTIMASSLAVALGVTGYAA | Negative |
| Q2FV52 | GYAAGTGHQAHAAEVNVDQA | Negative |
| Q2FV52 | SLAVALGVTGYAAGTGHQAH | Negative |
| Q2FV52 | GTGHQAHAAEVNVDQAHLVD | Negative |
| Q2FV52 | TGHQAHAAEVNVDQAHLVDL | Negative |
| Q2FV52 | ASSLAVALGVTGYAAGTGHQ | Negative |
| Q2FV52 | VTGYAAGTGHQAHAAEVNVD | Negative |
| Q2FV52 | KTIMASSLAVALGVTGYAAG | Negative |
| Q2FV52 | HAAEVNVDQAHLVDLAHNHQ | Negative |
| Q2FV52 | VALGVTGYAAGTGHQAHAEE | Negative |
| Q2FV52 | LAVALGVTGYAAGTGHQAHA | Negative |
| Q2FV52 | AHAAEVNVDQAHLVDLAHNH | Negative |
| Q2FV52 | MKKTIMASSLAVALGVTGYA | Negative |
| Q2FV52 | GHQAHAAEVNVDQAHLVDLA | Negative |
| Q2FV52 | IMASSLAVALGVTGYAAGTG | Negative |
| Q2FV52 | AAEVNVDQAHLVDLAHNHQD | Negative |
| Q2FXC2 | VMVKGLTALTILTSLGFAEN | Negative |
| Q2FXC2 | ISNQPHSIAKAENVKEITD  | Negative |
| Q2FXC2 | TSLGFAENISNQPHSIAKAE | Negative |
| Q2FXC2 | ILTSLGFAENISNQPHSIAK | Negative |
| Q2FXC2 | KGLTALTILTSLGFAENISN | Negative |
| Q2FXC2 | KNVMVKGLTALTILTSLGFA | Negative |
| Q2FXC2 | LTALTILTSLGFAENISNQP | Negative |
| Q2FXC2 | ALTILTSLGFAENISNQPHS | Negative |
| Q2FXC2 | NKNVMVKGLTALTILTSLGF | Negative |
| Q2FXC2 | MNKNVMVKGLTALTILTSLG | Negative |
| Q2FXC2 | HSIAKAENVKEITDATKEP  | Negative |
| Q2FXC2 | LGFAENISNQPHSIAKAEN  | Negative |
| Q2FXC2 | ENISNQPHSIAKAENVKEI  | Negative |
| Q2FXC2 | NQPHSIAKAENVKEITDAT  | Negative |
| Q2FXC2 | SLGFAENISNQPHSIAKAEK | Negative |
| Q2FXC2 | NISNQPHSIAKAENVKEIT  | Negative |
| Q2FXC2 | GLTALTILTSLGFAENISNQ | Negative |
| Q2FXC2 | NVMVKGLTALTILTSLGFAE | Negative |
| Q2FXC2 | QPHSIAKAENVKEITDATK  | Negative |
| Q2FXC2 | PHSIAKAENVKEITDATKE  | Negative |
| Q2FXC2 | VKGLTALTILTSLGFAENIS | Negative |

|        |                      |          |
|--------|----------------------|----------|
| Q2FXC2 | LTILTSLGFAENISNQPHSI | Negative |
| Q2FXC2 | AENISNQPHSIAKAENNVKE | Negative |
| Q2FXC2 | TILTSLGFAENISNQPHSIA | Negative |
| Q2FXC2 | MVKGLTALTILTSLGFAENI | Negative |
| Q2FXC2 | TALTILTSLGFAENISNQPH | Negative |
| Q2FXC2 | GFAENISNQPHSIAKAENNV | Negative |
| Q2FXC2 | LTSLGFAENISNQPHSIAKA | Negative |
| Q2FXC2 | SNQPHSIAKAENNVKEITDA | Negative |
| Q2FXC3 | LTILTSVTGIGTTLVEEVQQ | Negative |
| Q2FXC3 | TSVTGIGTTLVEEVQQTAKA | Negative |
| Q2FXC3 | VVIKSLAALTILTSVTGIGT | Negative |
| Q2FXC3 | LAALTILTSVTGIGTTLVEE | Negative |
| Q2FXC3 | SLAALTILTSVTGIGTTLVE | Negative |
| Q2FXC3 | AALTILTSVTGIGTTLVEEV | Negative |
| Q2FXC3 | NKNVVIKSLAALTILTSVTG | Negative |
| Q2FXC3 | KNVVIKSLAALTILTSVTGI | Negative |
| Q2FXC3 | TLVEEVQQTAKAENNVTKVK | Negative |
| Q2FXC3 | LVEEVQQTAKAENNVTKVKD | Negative |
| Q2FXC3 | VEEVQQTAKAENNVTKVKDT | Negative |
| Q2FXC3 | VQQTAKAENNVTKVKDTNIF | Negative |
| Q2FXC3 | GTTLVEEVQQTAKAENNVTK | Negative |
| Q2FXC3 | TTLVEEVQQTAKAENNVTKV | Negative |
| Q2FXC3 | VTGIGTTLVEEVQQTAKAEN | Negative |
| Q2FXC3 | EEVQQTAKAENNVTKVKDTN | Negative |
| Q2FXC3 | IKSLAALTILTSVTGIGTTL | Negative |
| Q2FXC3 | ILTSVTGIGTTLVEEVQQTA | Negative |
| Q2FXC3 | TGIGTTLVEEVQQTAKAENN | Negative |
| Q2FXC3 | GIGTTLVEEVQQTAKAENNV | Negative |
| Q2FXC3 | SVTGIGTTLVEEVQQTAKAE | Negative |
| Q2FXC3 | KSLAALTILTSVTGIGTTLV | Negative |
| Q2FXC3 | NVVIKSLAALTILTSVTGIG | Negative |
| Q2FXC3 | TILTSVTGIGTTLVEEVQQT | Negative |
| Q2FXC3 | ALTILTSVTGIGTTLVEEVQ | Negative |
| Q2FXC3 | LTSVTGIGTTLVEEVQQTAK | Negative |
| Q2FXC3 | EVQQTAKAENNVTKVKDTNI | Negative |
| Q2FXC3 | VIKSLAALTILTSVTGIGTT | Negative |
| Q2FXC3 | MNKNVVIKSLAALTILTSVT | Negative |
| Q2FXC4 | NIVIKSMAALAILTSVTGIN | Negative |
| Q2FXC4 | NKNIVIKSMAALAILTSVTG | Negative |
| Q2FXC4 | KNIVIKSMAALAILTSVTGI | Negative |
| Q2FXC4 | AILTSVTGINAAVVEETQQI | Negative |
| Q2FXC4 | KSMAALAILTSVTGINAAVV | Negative |
| Q2FXC4 | NAAVVEETQQIANAENVTQ  | Negative |
| Q2FXC4 | AVVEETQQIANAENVTQVK  | Negative |
| Q2FXC4 | ILTSVTGINAAVVEETQQIA | Negative |
| Q2FXC4 | LTSVTGINAAVVEETQQIAN | Negative |



|        |                        |          |
|--------|------------------------|----------|
| Q2FXC4 | GINAAVVEETQQIANAEKNV   | Negative |
| Q2FXC4 | IVIKSMAALAILTSVTGINA   | Negative |
| Q2FXC4 | AALAILTSVTGINAAVVEET   | Negative |
| Q2FXC4 | TGINAAVVEETQQIANAEKN   | Negative |
| Q2FXC4 | TSVTGINAAVVEETQQIANA   | Negative |
| Q2FXC4 | ETQQIANAEKNVTQVKDTNI   | Negative |
| Q2FXC4 | SMAALAILTSVTGINAAVVE   | Negative |
| Q2FXC4 | ALAILTSVTGINAAVVEETQ   | Negative |
| Q2FXC4 | EETQQIANAEKNVTQVKDTN   | Negative |
| Q2FXC4 | LAILTSVTGINAAVVEETQQ   | Negative |
| Q2FXC4 | VIKSMAALAILTSVTGINAA   | Negative |
| Q2FXC4 | TQQIANAEKNVTQVKDTNIF   | Negative |
| Q2FXC4 | VEETQQIANAEKNVTQVKDT   | Negative |
| Q2FXC4 | VVEETQQIANAEKNVTQVKD   | Negative |
| Q2FXC4 | AAVVEETQQIANAEKNVTQV   | Negative |
| Q2FXC4 | MAALAILTSVTGINAAVVEE   | Negative |
| Q2FXC4 | IKSMAALAILTSVTGINAAV   | Negative |
| Q2FXC4 | SVTGINAAVVEETQQIANAE   | Negative |
| Q2FXC4 | VTGINAAVVEETQQIANAEK   | Negative |
| Q2FXC4 | MNKNIVIKSMAALAILTSVT   | Negative |
| Q2FXC8 | SITGVGTTMVEGIQQTAKAE   | Negative |
| Q2FXC8 | GTTMVEGIQQTAKAENTVKQ   | Negative |
| Q2FXC8 | IQQTAKAENTVKQITNTNVA   | Negative |
| Q2FXC8 | TSITGVGTTMVEGIQQTAKA   | Negative |
| Q2FXC8 | LTILTSITGVGTTMVEGIQQ   | Negative |
| Q2FXC8 | MVEGIQQTAKAENTVKQITN   | Negative |
| Q2FXC8 | KSIAALTILTSITGVGTTMV   | Negative |
| Q2FXC8 | MNKNIIKSIAALTILTSIT    | Negative |
| Q2FXC8 | NIIKSIAALTILTSITGVG    | Negative |
| Q2FXC8 | ALTILTSITGVGTTMVEGIQ   | Negative |
| Q2FXC8 | GVGTTMVEGIQQTAKAENTV   | Negative |
| Q2FXC8 | GIQQTAKAENTVKQITNTNV   | Negative |
| Q2FXC8 | NKNIIKSIAALTILTSITG    | Negative |
| Q2FXC8 | ITGVGTTMVEGIQQTAKAEN   | Negative |
| Q2FXC8 | EGIQQTAKAENTVKQITNTN   | Negative |
| Q2FXC8 | TGVGTTMVEGIQQTAKAENT   | Negative |
| Q2FXC8 | TTMVEGIQQTAKAENTVKQI   | Negative |
| Q2FXC8 | ILTSITGVGTTMVEGIQQTAKA | Negative |
| Q2FXC8 | AALTILTSITGVGTTMVEGI   | Negative |
| Q2FXC8 | KNIIKSIAALTILTSITGV    | Negative |
| Q2FXC8 | IAALTILTSITGVGTTMVEG   | Negative |
| Q2FXC8 | TMVEGIQQTAKAENTVKQIT   | Negative |
| Q2FXC8 | LTSITGVGTTMVEGIQQTAK   | Negative |
| Q2FXC8 | VEGIQQTAKAENTVKQITNT   | Negative |
| Q2FXC8 | SIAALTILTSITGVGTTMVE   | Negative |
| Q2FXC8 | IKSIAALTILTSITGVGTTM   | Negative |

|        |                      |          |
|--------|----------------------|----------|
| Q2FXC8 | IIKSIAALTILTSITGVGT  | Negative |
| Q2FXC8 | IIKSIAALTILTSITGVGTT | Negative |
| Q2FXC8 | TILTSITGVGTTMVEGIQQT | Negative |
| Q2FZL3 | ANNNKAKADSHSKQLEINVK | Negative |
| Q2FZL3 | FNIISIIMVSMILSLGAFA  | Negative |
| Q2FZL3 | LILSLGAFANNNKAKADSHS | Negative |
| Q2FZL3 | AFANNNKAKADSHSKQLEIN | Negative |
| Q2FZL3 | LGAFANNNKAKADSHSKQLE | Negative |
| Q2FZL3 | VSMILSLGAFANNNKAKAD  | Negative |
| Q2FZL3 | MVSMILSLGAFANNNKAKA  | Negative |
| Q2FZL3 | NSSCKSRVFNIISIIMVSM  | Negative |
| Q2FZL3 | GAFANNNKAKADSHSKQLEI | Negative |
| Q2FZL3 | IMVSMILSLGAFANNNKAK  | Negative |
| Q2FZL3 | VFNIISIIMVSMILSLGAF  | Negative |
| Q2FZL3 | MNSSCKSRVFNIISIIMVSM | Negative |
| Q2FZL3 | FANNNKAKADSHSKQLEINV | Negative |
| Q2FZL3 | IIMVSMILSLGAFANNNKA  | Negative |
| Q2FZL3 | SCKSRVFNIISIIMVSMIL  | Negative |
| Q2FZL3 | NIISIIMVSMILSLGAFAN  | Negative |
| Q2FZL3 | SLGAFANNNKAKADSHSKQL | Negative |
| Q2FZL3 | SRVFNIISIIMVSMILSLG  | Negative |
| Q2FZL3 | SIIMVSMILSLGAFANNNK  | Negative |
| Q2FZL3 | IISIIMVSMILSLGAFANN  | Negative |
| Q2FZL3 | ISIIMVSMILSLGAFANN   | Negative |
| Q2FZL3 | LSLGAFANNNKAKADSHSKQ | Negative |
| Q2FZL3 | RVFNISIIMVSMILSLGA   | Negative |
| Q2FZL3 | KSRVFNIISIIMVSMILSL  | Negative |
| Q2FZL3 | MLILSLGAFANNNKAKADSH | Negative |
| Q2FZL3 | CKSRVFNIISIIMVSMILS  | Negative |
| Q2FZL3 | NNNKAKADSHSKQLEINVKS | Negative |
| Q2FZL3 | SSCKSRVFNIISIIMVSM   | Negative |
| Q2FZL3 | SMLILSLGAFANNNKAKADS | Negative |
| Q2HZ28 | QFETLIMKIAGRSGVWYYGS | Negative |
| Q2HZ28 | LIMKIAGRSGVWYYGSYGCY | Negative |
| Q2HZ28 | LVQFETLIMKIAGRSGVWYY | Negative |
| Q2HZ28 | KIAGRSGVWYYGSYGCYCGS | Negative |
| Q2HZ28 | AVLLVGVEGSLVQFETLIMK | Negative |
| Q2HZ28 | SLVQFETLIMKIAGRSGVWY | Negative |
| Q2HZ28 | LWIMAVLLVGVEGSLVQFET | Negative |
| Q2HZ28 | ETLIMKIAGRSGVWYYGSYG | Negative |
| Q2HZ28 | LVGVEGSLVQFETLIMKIAG | Negative |
| Q2HZ28 | TLWIMAVLLVGVEGSLVQFE | Negative |
| Q2HZ28 | FETLIMKIAGRSGVWYYGSY | Negative |
| Q2HZ28 | MRTLWIMAVLLVGVEGSLVQ | Negative |
| Q2HZ28 | IAGRSGVWYYGSYGCYCGSG | Negative |
| Q2HZ28 | VGVEGSLVQFETLIMKIAGR | Negative |

|        |                       |          |
|--------|-----------------------|----------|
| Q2HZ28 | WIMAVLLVGVEGSLVQFETL  | Negative |
| Q2HZ28 | GRSGVWYYGSYGCYCGSGGQ  | Negative |
| Q2HZ28 | GVEGSLVQFETLIMKIAGRS  | Negative |
| Q2HZ28 | EGSLVQFETLIMKIAGRSGV  | Negative |
| Q2HZ28 | GSLVQFETLIMKIAGRSGVW  | Negative |
| Q2HZ28 | MKIAGRSGVWYYGSYGCYCG  | Negative |
| Q2HZ28 | AGRSGVWYYGSYGCYCGSGG  | Negative |
| Q2HZ28 | IMAVLLVGVEGSLVQFETLI  | Negative |
| Q2HZ28 | IMKIAGRSGVWYYGSYGCYC  | Negative |
| Q2HZ28 | VEGSLVQFETLIMKIAGRSG  | Negative |
| Q2HZ28 | VQFETLIMKIAGRSGVWYYG  | Negative |
| Q2HZ28 | TLIMKIAGRSGVWYYGSYGC  | Negative |
| Q2HZ28 | LLVGVEGSLVQFETLIMKIA  | Negative |
| Q2HZ28 | MAVLLVGVEGSLVQFETLIM  | Negative |
| Q2HZ28 | VLLVGVEGSLVQFETLIMKI  | Negative |
| Q2KJF1 | LSPVTEQATFFDPRPSLWAE  | Negative |
| Q2KJF1 | LWGLSLSPVTEQATFFDPRP  | Negative |
| Q2KJF1 | PVTEQATFFDPRPSLWAEAG  | Negative |
| Q2KJF1 | SAWAALLLLWGLSLSPVTEQ  | Negative |
| Q2KJF1 | TEQATFFDPRPSLWAEAGSP  | Negative |
| Q2KJF1 | SLWAEAGSPLAPWADVTLTC  | Negative |
| Q2KJF1 | RPSLWAEAGSPLAPWADVTL  | Negative |
| Q2KJF1 | VTEQATFFDPRPSLWAEAGS  | Negative |
| Q2KJF1 | PRPSLWAEAGSPLAPWADVT  | Negative |
| Q2KJF1 | AWAALLLLWGLSLSPVTEQA  | Negative |
| Q2KJF1 | FFDPRPSLWAEAGSPLAPWA  | Negative |
| Q2KJF1 | ATFFDPRPSLWAEAGSPLAP  | Negative |
| Q2KJF1 | DPRPSLWAEAGSPLAPWADV  | Negative |
| Q2KJF1 | SPVTEQATFFDPRPSLWAEA  | Negative |
| Q2KJF1 | PSLWAEAGSPLAPWADVTLT  | Negative |
| Q2KJF1 | LLWGLSLSPVTEQATFFDPR  | Negative |
| Q2KJF1 | AALLLLWGLSLSPVTEQATF  | Negative |
| Q2KJF1 | SLSPVTEQATFFDPRPSLWA  | Negative |
| Q2KJF1 | EQATFFDPRPSLWAEAGSPL  | Negative |
| Q2KJF1 | TFFDPRPSLWAEAGSPLAPW  | Negative |
| Q2KJF1 | WGLSLSPVTEQATFFDPRPS  | Negative |
| Q2KJF1 | ALLLLWGLSLSPVTEQATFF  | Negative |
| Q2KJF1 | GLSLSPVTEQATFFDPRPSL  | Negative |
| Q2KJF1 | WAALLLLWGLSLSPVTEQAT  | Negative |
| Q2KJF1 | LSLSPVTEQATFFDPRPSLW  | Negative |
| Q2KJF1 | MSAWAALLLLWGLSLSPVTE  | Negative |
| Q2KJF1 | QATFFDPRPSLWAEAGSPLA  | Negative |
| Q2KJF1 | FDPRPSLWAEAGSPLAPWAD  | Negative |
| Q2KJF1 | LLWGLSLSPVTEQATFFDP   | Negative |
| Q2NME3 | IGMVVECKDG YLVGNDGCKY | Negative |
| Q2NME3 | VVECKDG YLVGNDGCKYSCF | Negative |

|        |                       |          |
|--------|-----------------------|----------|
| Q2NME3 | TRFVLFICCFFLIGMVVECK  | Negative |
| Q2NME3 | KDGYLVGNDGCKYSCFTRPG  | Negative |
| Q2NME3 | VECKDGYLVGNDGCKYSCFT  | Negative |
| Q2NME3 | YLVGNDGCKYSCFTRPGTYC  | Negative |
| Q2NME3 | ECKDGYLVGNDGCKYSCFTR  | Negative |
| Q2NME3 | GCKYSCFTRPGTYCANEC    | Negative |
| Q2NME3 | FVLFICCFFLIGMVVECKDG  | Negative |
| Q2NME3 | LIGMVVECKDGYLVGNDGCK  | Negative |
| Q2NME3 | DGCKYSCFTRPGTYCANEC   | Negative |
| Q2NME3 | LVGNDGCKYSCFTRPGTYCA  | Negative |
| Q2NME3 | MVVECKDGYLVGNDGCKYSC  | Negative |
| Q2NME3 | GMVVECKDGYLVGNDGCKYS  | Negative |
| Q2NME3 | MTRFVLFICCFFLIGMVVEC  | Negative |
| Q2NME3 | CCFLIGMVVECKDGYLVGN   | Negative |
| Q2NME3 | FFLIGMVVECKDGYLVGNDG  | Negative |
| Q2NME3 | CKDGYLVGNDGCKYSCFTRP  | Negative |
| Q2NME3 | CFFLIGMVVECKDGYLVGND  | Negative |
| Q2NME3 | VGNDGCKYSCFTRPGTYCAN  | Negative |
| Q2NME3 | FICCFFLIGMVVECKDGYLV  | Negative |
| Q2NME3 | DGYLVGNDGCKYSCFTRPGT  | Negative |
| Q2NME3 | VLFIICCFFLIGMVVECKDGY | Negative |
| Q2NME3 | NDGCKYSCFTRPGTYCANEC  | Negative |
| Q2NME3 | RFVLFICCFFLIGMVVECKD  | Negative |
| Q2NME3 | GNDGCKYSCFTRPGTYCANEC | Negative |
| Q2NME3 | ICCFFLIGMVVECKDGYLVG  | Negative |
| Q2NME3 | FLIGMVVECKDGYLVGNDGC  | Negative |
| Q2NME3 | GYLVGNDGCKYSCFTRPGTY  | Negative |
| Q2PG81 | TGKEAVKNGLYGCNCGVGK   | Negative |
| Q2PG81 | SLVELWKMVFQETGKEAVKN  | Negative |
| Q2PG81 | ETGKEAVKNGLYGCNCGVG   | Negative |
| Q2PG81 | KMVVFQETGKEAVKNGLYGC  | Negative |
| Q2PG81 | ELWKMVFQETGKEAVKNGLY  | Negative |
| Q2PG81 | FQETGKEAVKNGLYGCNCG   | Negative |
| Q2PG81 | LGVEGSLVELWKMVFQETGK  | Negative |
| Q2PG81 | IMAVLLLGVEGSLVELWKMV  | Negative |
| Q2PG81 | EGSLVELWKMVFQETGKEAV  | Negative |
| Q2PG81 | LVELWKMVFQETGKEAVKNY  | Negative |
| Q2PG81 | LLGVEGSLVELWKMVFQETG  | Negative |
| Q2PG81 | WIMAVLLLGVEGSLVELWKM  | Negative |
| Q2PG81 | VLLLGVEGSLVELWKMVFQE  | Negative |
| Q2PG81 | AVLLLGVEGSLVELWKMVFQ  | Negative |
| Q2PG81 | LWKMVFQETGKEAVKNGLY   | Negative |
| Q2PG81 | LLLGVEGSLVELWKMVFQET  | Negative |
| Q2PG81 | VEGSLVELWKMVFQETGKEA  | Negative |
| Q2PG81 | GVEGSLVELWKMVFQETGKE  | Negative |
| Q2PG81 | GSLVELWKMVFQETGKEAVK  | Negative |

|        |                      |          |
|--------|----------------------|----------|
| Q2PG81 | GKEAVKNYGLYGCNCGVGKR | Negative |
| Q2PG81 | MRTLWIMAVLLLGVESLVE  | Negative |
| Q2PG81 | MAVLLLGVESLVELWKMVF  | Negative |
| Q2PG81 | TLWIMAVLLLGVESLVELW  | Negative |
| Q2PG81 | MVFQETGKEAVKNYGLYGCN | Negative |
| Q2PG81 | VFQETGKEAVKNYGLYGCNC | Negative |
| Q2PG81 | WKMVFQETGKEAVKNYGLYG | Negative |
| Q2PG81 | VELWKMVFQETGKEAVKNYG | Negative |
| Q2PG81 | LWIMAVLLLGVESLVELWK  | Negative |
| Q2PG81 | QETGKEAVKNYGLYGCNCGV | Negative |
| Q2PGV8 | ALLGLGAATPTDYSTSSYSK | Negative |
| Q2PGV8 | YSTSSYSKNQGLAQAWTSKG | Negative |
| Q2PGV8 | STITAALALLGLGAATPTDY | Negative |
| Q2PGV8 | TSSYSKNQGLAQAWTSKGRQ | Negative |
| Q2PGV8 | KNQGLAQAWTSKGRQYIGTA | Negative |
| Q2PGV8 | YSKNQGLAQAWTSKGRQYIG | Negative |
| Q2PGV8 | ITAALALLGLGAATPTDYST | Negative |
| Q2PGV8 | LALLGLGAATPTDYSTSSYS | Negative |
| Q2PGV8 | STSSYSKNQGLAQAWTSKGR | Negative |
| Q2PGV8 | GAATPTDYSTSSYSKNQGLA | Negative |
| Q2PGV8 | FSTITAALALLGLGAATPTD | Negative |
| Q2PGV8 | AALALLGLGAATPTDYSTSS | Negative |
| Q2PGV8 | MHFSTITAALALLGLGAATP | Negative |
| Q2PGV8 | GLGAATPTDYSTSSYSKNQG | Negative |
| Q2PGV8 | SKNQGLAQAWTSKGRQYIGT | Negative |
| Q2PGV8 | LGLGAATPTDYSTSSYSKNQ | Negative |
| Q2PGV8 | ATPTDYSTSSYSKNQGLAQ  | Negative |
| Q2PGV8 | DYSTSSYSKNQGLAQAWTSK | Negative |
| Q2PGV8 | HFSTITAALALLGLGAATPT | Negative |
| Q2PGV8 | SYSKNQGLAQAWTSKGRQYI | Negative |
| Q2PGV8 | SSYSKNQGLAQAWTSKGRQY | Negative |
| Q2PGV8 | TAALALLGLGAATPTDYSTS | Negative |
| Q2PGV8 | PTDYSTSSYSKNQGLAQAWT | Negative |
| Q2PGV8 | ALALLGLGAATPTDYSTSSY | Negative |
| Q2PGV8 | AATPTDYSTSSYSKNQGLAQ | Negative |
| Q2PGV8 | TPTDYSTSSYSKNQGLAQAW | Negative |
| Q2PGV8 | TITAALALLGLGAATPTDYS | Negative |
| Q2PGV8 | TDYSTSSYSKNQGLAQAWTS | Negative |
| Q2PGV8 | LGAATPTDYSTSSYSKNQGL | Negative |
| Q2PGY1 | YTSSSTGTSNGYYYSFWTDG | Negative |
| Q2PGY1 | RESYTSSSTGTSNGYYYSFW | Negative |
| Q2PGY1 | ADLSKRESYTSSSTGTSNGY | Negative |
| Q2PGY1 | SGAFSATADLSKRESYTSSS | Negative |
| Q2PGY1 | AFSATADLSKRESYTSSSTG | Negative |
| Q2PGY1 | TSLFSFFALASGAFSATADL | Negative |
| Q2PGY1 | ALASGAFSATADLSKRESYT | Negative |

|        |                      |          |
|--------|----------------------|----------|
| Q2PGY1 | KRESYTSSSTGTSNGYYYSF | Negative |
| Q2PGY1 | SFFALASGAFSATADLSKRE | Negative |
| Q2PGY1 | FFALASGAFSATADLSKRES | Negative |
| Q2PGY1 | ESYTSSSTGTSNGYYYSFWT | Negative |
| Q2PGY1 | DLSKRESYTSSSTGTSNGYY | Negative |
| Q2PGY1 | TADLSKRESYTSSSTGTSNG | Negative |
| Q2PGY1 | ASGAFSATADLSKRESYTSS | Negative |
| Q2PGY1 | SKRESYTSSSTGTSNGYYYS | Negative |
| Q2PGY1 | MPSLTSLFSFFALASGAFSA | Negative |
| Q2PGY1 | ATADLSKRESYTSSSTGTSN | Negative |
| Q2PGY1 | FALASGAFSATADLSKRESY | Negative |
| Q2PGY1 | LSKRESYTSSSTGTSNGYYY | Negative |
| Q2PGY1 | SLFSFFALASGAFSATADLS | Negative |
| Q2PGY1 | SLTSLFSFFALASGAFSATA | Negative |
| Q2PGY1 | GAFSATADLSKRESYTSSST | Negative |
| Q2PGY1 | FSFFALASGAFSATADLSKR | Negative |
| Q2PGY1 | SATADLSKRESYTSSSTGTS | Negative |
| Q2PGY1 | PSLTSLFSFFALASGAFSAT | Negative |
| Q2PGY1 | SYTSSSTGTSNGYYYSFWTD | Negative |
| Q2PGY1 | LFSFFALASGAFSATADLSK | Negative |
| Q2PGY1 | LTSLFSFFALASGAFSATAD | Negative |
| Q2PGY1 | FSATADLSKRESYTSSSTGT | Negative |
| Q2U4L7 | AASTFSPARPPALPLAVKSP | Negative |
| Q2U4L7 | LSVASLVSYAGAASTFSPAR | Negative |
| Q2U4L7 | PARPPALPLAVKSPYLSTWL | Negative |
| Q2U4L7 | ARPPALPLAVKSPYLSTWLS | Negative |
| Q2U4L7 | CLSVASLVSYAGAASTFSPA | Negative |
| Q2U4L7 | HFLSFCLSVASLVSYAGAAS | Negative |
| Q2U4L7 | VASLVSYAGAASTFSPARPP | Negative |
| Q2U4L7 | TFSPARPPALPLAVKSPYLS | Negative |
| Q2U4L7 | STFSPARPPALPLAVKSPYL | Negative |
| Q2U4L7 | RPPALPLAVKSPYLSTWLSA | Negative |
| Q2U4L7 | MHFLSFCLSVASLVSYAGAA | Negative |
| Q2U4L7 | MMHFLSFCLSVASLVSYAGA | Negative |
| Q2U4L7 | SPARPPALPLAVKSPYLSTW | Negative |
| Q2U4L7 | VSYAGAASTFSPARPPALPL | Negative |
| Q2U4L7 | PALPLAVKSPYLSTWLSAGT | Negative |
| Q2U4L7 | ASTFSPARPPALPLAVKSPY | Negative |
| Q2U4L7 | SYAGAASTFSPARPPALPLA | Negative |
| Q2U4L7 | YAGAASTFSPARPPALPLAV | Negative |
| Q2U4L7 | PPALPLAVKSPYLSTWLSAG | Negative |
| Q2U4L7 | LVSYAGAASTFSPARPPALP | Negative |
| Q2U4L7 | FSPARPPALPLAVKSPYLST | Negative |
| Q2U4L7 | AGAASTFSPARPPALPLAVK | Negative |
| Q2U4L7 | FCLSVASLVSYAGAASTFSP | Negative |
| Q2U4L7 | ASLVSYAGAASTFSPARPPA | Negative |

|        |                       |          |
|--------|-----------------------|----------|
| Q2U4L7 | SLVSYAGAASTFSPARPPAL  | Negative |
| Q2U4L7 | FLSFCLSVASLVSYAGAAST  | Negative |
| Q2U4L7 | SVASLVSYAGAASTFSPARP  | Negative |
| Q2U4L7 | GAASTFSPARPPALPLAVKS  | Negative |
| Q2U4L7 | LSFCLSVASLVSYAGAASTF  | Negative |
| Q2ULM2 | QLEDLLEGSQQLEDFAYAYP  | Negative |
| Q2ULM2 | FPEDIQLEDLLEGSQQLEDF  | Negative |
| Q2ULM2 | DEFPEDIQLEDLLEGSQQLE  | Negative |
| Q2ULM2 | ASLLSGVLAGRALVSPDEFP  | Negative |
| Q2ULM2 | WASLLSGVLAGRALVSPDEF  | Negative |
| Q2ULM2 | ALVSPDEFPEIDIQLEDLLEG | Negative |
| Q2ULM2 | LLSGVLAGRALVSPDEFPEID | Negative |
| Q2ULM2 | SGVLAGRALVSPDEFPEIDIQ | Negative |
| Q2ULM2 | SLLWASLLSGVLAGRALVSP  | Negative |
| Q2ULM2 | SPDEFPEIDIQLEDLLEGSQQ | Negative |
| Q2ULM2 | LSGVLAGRALVSPDEFPEIDI | Negative |
| Q2ULM2 | IQLEDLLEGSQQLEDFAYAY  | Negative |
| Q2ULM2 | EFPEIDIQLEDLLEGSQQLED | Negative |
| Q2ULM2 | SLLSGVLAGRALVSPDEFPE  | Negative |
| Q2ULM2 | RALVSPDEFPEIDIQLEDLLE | Negative |
| Q2ULM2 | LAGRALVSPDEFPEIDIQLED | Negative |
| Q2ULM2 | LWASLLSGVLAGRALVSPDE  | Negative |
| Q2ULM2 | DIQLEDLLEGSQQLEDFAYA  | Negative |
| Q2ULM2 | GRALVSPDEFPEIDIQLEDLL | Negative |
| Q2ULM2 | AGRALVSPDEFPEIDIQLEDL | Negative |
| Q2ULM2 | GVLAGRALVSPDEFPEIDIQL | Negative |
| Q2ULM2 | LLWASLLSGVLAGRALVSPD  | Negative |
| Q2ULM2 | EDIQLEDLLEGSQQLEDFAY  | Negative |
| Q2ULM2 | PDEFPEIDIQLEDLLEGSQQL | Negative |
| Q2ULM2 | PEIDIQLEDLLEGSQQLEDFA | Negative |
| Q2ULM2 | VSPDEFPEIDIQLEDLLEGSQ | Negative |
| Q2ULM2 | MRSLLWASLLSGVLAGRALV  | Negative |
| Q2ULM2 | VLAGRALVSPDEFPEIDIQLE | Negative |
| Q2ULM2 | LVSPDEFPEIDIQLEDLLEGS | Negative |
| Q2YHJ2 | AVLLVGVEGSLLEFGRMIKE  | Negative |
| Q2YHJ2 | LVGVEGSLLEFGRMIKEETG  | Negative |
| Q2YHJ2 | VEGSLLEFGRMIKEETGKNP  | Negative |
| Q2YHJ2 | IKEETGKNPLFSYISYGCYC  | Negative |
| Q2YHJ2 | GRMIKEETGKNPLFSYISYG  | Negative |
| Q2YHJ2 | FGRMIKEETGKNPLFSYISY  | Negative |
| Q2YHJ2 | GSLLEFGRMIKEETGKNPLF  | Negative |
| Q2YHJ2 | VGVEGSLLEFGRMIKEETGK  | Negative |
| Q2YHJ2 | LWIMAVLLVGVEGSLLEFGR  | Negative |
| Q2YHJ2 | SLEFGRMIKEETGKNPLFS   | Negative |
| Q2YHJ2 | TGKNPLFSYISYGCYCGWGG  | Negative |
| Q2YHJ2 | KEETGKNPLFSYISYGCYCG  | Negative |

|        |                      |          |
|--------|----------------------|----------|
| Q2YHJ2 | VLLVGVEGSLLEFGRMIKEE | Negative |
| Q2YHJ2 | MIKEETGKNPLFSYISYGCY | Negative |
| Q2YHJ2 | TLWIMAVLLVGVEGSLLEFG | Negative |
| Q2YHJ2 | MRTLWIMAVLLVGVEGSLLE | Negative |
| Q2YHJ2 | IMAVLLVGVEGSLLEFGRMI | Negative |
| Q2YHJ2 | ETGKNPLFSYISYGCYCGWG | Negative |
| Q2YHJ2 | EETGKNPLFSYISYGCYCGW | Negative |
| Q2YHJ2 | GVEGSLLEFGRMIKEETGKN | Negative |
| Q2YHJ2 | EFGRMIKEETGKNPLFSYIS | Negative |
| Q2YHJ2 | LLVGVEGSLLEFGRMIKEET | Negative |
| Q2YHJ2 | WIMAVLLVGVEGSLLEFGRM | Negative |
| Q2YHJ2 | GKNPLFSYISYGCYCGWGGQ | Negative |
| Q2YHJ2 | MAVLLVGVEGSLLEFGRMIK | Negative |
| Q2YHJ2 | RMIKEETGKNPLFSYISYGC | Negative |
| Q2YHJ2 | LEFGRMIKEETGKNPLFSYI | Negative |
| Q2YHJ2 | EGSLLEFGRMIKEETGKNPL | Negative |
| Q2YHJ2 | LLEFGRMIKEETGKNPLFSY | Negative |
| Q2YHJ3 | GNLLQFEMMINKMAGRSGIR | Negative |
| Q2YHJ3 | ILAVLLLGVKGNLLQFEMMI | Negative |
| Q2YHJ3 | MMINKMAGRSGIRWYSYGC  | Negative |
| Q2YHJ3 | QFEMMINKMAGRSGIRWYSD | Negative |
| Q2YHJ3 | NKMAGRSGIRWYSYGCYCG  | Negative |
| Q2YHJ3 | TLWILAVLLLGVKGNLLQFE | Negative |
| Q2YHJ3 | LQFEMMINKMAGRSGIRWYS | Negative |
| Q2YHJ3 | LWILAVLLLGVKGNLLQFEM | Negative |
| Q2YHJ3 | LLGVKGNLLQFEMMINKMA  | Negative |
| Q2YHJ3 | KMAGRSGIRWYSYGCYCGK  | Negative |
| Q2YHJ3 | INKMAGRSGIRWYSYGCYC  | Negative |
| Q2YHJ3 | MINKMAGRSGIRWYSYGCY  | Negative |
| Q2YHJ3 | KGNLLQFEMMINKMAGRSGI | Negative |
| Q2YHJ3 | LAVLLLGVKGNLLQFEMMIN | Negative |
| Q2YHJ3 | NLLQFEMMINKMAGRSGIRW | Negative |
| Q2YHJ3 | MRTLWILAVLLLGVKGNLLQ | Negative |
| Q2YHJ3 | LGVKGNLLQFEMMINKMAGR | Negative |
| Q2YHJ3 | WILAVLLLGVKGNLLQFEMM | Negative |
| Q2YHJ3 | AGRSGIRWYSYGCYCGKGG  | Negative |
| Q2YHJ3 | VLLLGVKGNLLQFEMMINKM | Negative |
| Q2YHJ3 | VKGNLLQFEMMINKMAGRSG | Negative |
| Q2YHJ3 | FEMMINKMAGRSGIRWYSYD | Negative |
| Q2YHJ3 | EMMINKMAGRSGIRWYSYD  | Negative |
| Q2YHJ3 | LLQFEMMINKMAGRSGIRWY | Negative |
| Q2YHJ3 | GVKGNLLQFEMMINKMAGRS | Negative |
| Q2YHJ3 | LLGVKGNLLQFEMMINKMAG | Negative |
| Q2YHJ3 | AVLLLGVKGNLLQFEMMINK | Negative |
| Q2YHJ3 | MAGRSGIRWYSYGCYCGKG  | Negative |
| Q2YHJ3 | GRSGIRWYSYGCYCGKGGH  | Negative |



|        |                       |          |
|--------|-----------------------|----------|
| Q2YHJ4 | WIMAVLLVGVEGSVIELGKM  | Negative |
| Q2YHJ4 | GSVIELGKMILQETGKNPVT  | Negative |
| Q2YHJ4 | SVIELGKMILQETGKNPVTY  | Negative |
| Q2YHJ4 | AVLLVGVEGSVIELGKMILQ  | Negative |
| Q2YHJ4 | QETGKNPVTYYSAYGCNCGP  | Negative |
| Q2YHJ4 | IELGKMILQETGKNPVTYYYS | Negative |
| Q2YHJ4 | EGSVIELGKMILQETGKNPV  | Negative |
| Q2YHJ4 | TLWIMAVLLVGVEGSVIELG  | Negative |
| Q2YHJ4 | LLVGVEGSVIELGKMILQET  | Negative |
| Q2YHJ4 | VLLVGVEGSVIELGKMILQE  | Negative |
| Q2YHJ4 | ELGKMILQETGKNPVTYYSA  | Negative |
| Q2YHJ4 | LGKMILQETGKNPVTYYSA Y | Negative |
| Q2YHJ4 | KMILQETGKNPVTYYSA YGC | Negative |
| Q2YHJ4 | GKNPVTYYSA YGCNCGPLGR | Negative |
| Q2YHJ4 | GVEGSVIELGKMILQETGKN  | Negative |
| Q2YHJ4 | ILQETGKNPVTYYSA YGCNC | Negative |
| Q2YHJ4 | MRTLWIMAVLLVGVEGSVIE  | Negative |
| Q2YHJ4 | LVGVEGSVIELGKMILQETG  | Negative |
| Q2YHJ4 | VEGSVIELGKMILQETGKNP  | Negative |
| Q2YHJ4 | TGKNPVTYYSA YGCNCGPLG | Negative |
| Q2YHJ4 | MILQETGKNPVTYYSA YGCN | Negative |
| Q2YHJ4 | LQETGKNPVTYYSA YGCNCG | Negative |
| Q2YHJ4 | VIELGKMILQETGKNPVTYY  | Negative |
| Q2YHJ4 | IMAVLLVGVEGSVIELGKMI  | Negative |
| Q2YHJ4 | VGVEGSVIELGKMILQETGK  | Negative |
| Q2YHJ4 | LWIMAVLLVGVEGSVIELGK  | Negative |
| Q2YHJ4 | MAVLLVGVEGSVIELGKMIL  | Negative |
| Q2YHJ4 | ETGKNPVTYYSA YGCNCGPL | Negative |
| Q2YHJ4 | GKMILQETGKNPVTYYSA YG | Negative |
| Q2YHJ6 | MAVLLLVKGNLLQFELMIK   | Negative |
| Q2YHJ6 | MSGRSGIRWYS DYGCYCGKG | Negative |
| Q2YHJ6 | LWIMAVLLLVKGNLLQFEL   | Negative |
| Q2YHJ6 | NLLQFELMIKKMSGRSGIRW  | Negative |
| Q2YHJ6 | AVLLLVKGNLLQFELMIKK   | Negative |
| Q2YHJ6 | QFELMIKKMSGRSGIRWYSD  | Negative |
| Q2YHJ6 | LMIKKMSGRSGIRWYS DYGC | Negative |
| Q2YHJ6 | KMSGRSGIRWYS DYGCYCGK | Negative |
| Q2YHJ6 | VLLLVKGNLLQFELMIKKM   | Negative |
| Q2YHJ6 | KKMSGRSGIRWYS DYGCYCG | Negative |
| Q2YHJ6 | GNLLQFELMIKKMSGRSGIR  | Negative |
| Q2YHJ6 | GRSGIRWYS DYGCYCGKGGH | Negative |
| Q2YHJ6 | LGVKGNLLQFELMIKKMSGR  | Negative |
| Q2YHJ6 | VKGNLLQFELMIKKMSGRSG  | Negative |
| Q2YHJ6 | KGNLLQFELMIKKMSGRSGI  | Negative |
| Q2YHJ6 | IKKMSGRSGIRWYS DYGCYC | Negative |
| Q2YHJ6 | FELMIKKMSGRSGIRWYS DY | Negative |

|        |                       |          |
|--------|-----------------------|----------|
| Q2YHJ6 | GVKGNLLQFELMIKKMSGRS  | Negative |
| Q2YHJ6 | LLQFELMIKKMSGRSGIRWY  | Negative |
| Q2YHJ6 | LLGVKGNLLQFELMIKKMSG  | Negative |
| Q2YHJ6 | WIMAVLLLGVKGNLLQFELM  | Negative |
| Q2YHJ6 | LLLVKGNLLQFELMIKKMS   | Negative |
| Q2YHJ6 | IMAVLLLVGVKGNLLQFELMI | Negative |
| Q2YHJ6 | MRTLWIMAVLLLGVKGNLLQ  | Negative |
| Q2YHJ6 | MIKKMSGRSGIRWYSDYGCY  | Negative |
| Q2YHJ6 | TLWIMAVLLLGVKGNLLQFE  | Negative |
| Q2YHJ6 | LQFELMIKKMSGRSGIRWYS  | Negative |
| Q2YHJ6 | ELMIKKMSGRSGIRWYSDYG  | Negative |
| Q2YHJ6 | SGRSGIRWYSDYGCYCGKGG  | Negative |
| Q2YHJ9 | VEGSVIQLGKMILQETGKNP  | Negative |
| Q2YHJ9 | IMAVLLVGVEGSVIQLGKMI  | Negative |
| Q2YHJ9 | SVIQLGKMILQETGKNPVKY  | Negative |
| Q2YHJ9 | MAVLLVGVEGSVIQLGKMIL  | Negative |
| Q2YHJ9 | TLWIMAVLLVGVEGSVIQLG  | Negative |
| Q2YHJ9 | LWIMAVLLVGVEGSVIQLGK  | Negative |
| Q2YHJ9 | MRTLWIMAVLLVGVEGSVIQ  | Negative |
| Q2YHJ9 | EGSVIQLGKMILQETGKNPV  | Negative |
| Q2YHJ9 | LQETGKNPVKYYGAYGCNCG  | Negative |
| Q2YHJ9 | GSVIQLGKMILQETGKNPVK  | Negative |
| Q2YHJ9 | LGKMILQETGKNPVKYYGAY  | Negative |
| Q2YHJ9 | GKNPVKYYGAYGCNCGPLGR  | Negative |
| Q2YHJ9 | ETGKNPVKYYGAYGCNCGPL  | Negative |
| Q2YHJ9 | ILQETGKNPVKYYGAYGCNC  | Negative |
| Q2YHJ9 | TGKNPVKYYGAYGCNCGPLG  | Negative |
| Q2YHJ9 | QLGKMILQETGKNPVKYYGA  | Negative |
| Q2YHJ9 | VLLVGVEGSVIQLGKMILQE  | Negative |
| Q2YHJ9 | MILQETGKNPVKYYGAYGCN  | Negative |
| Q2YHJ9 | LVGVEGSVIQLGKMILQETG  | Negative |
| Q2YHJ9 | AVLLVGVEGSVIQLGKMILQ  | Negative |
| Q2YHJ9 | QETGKNPVKYYGAYGCNCGP  | Negative |
| Q2YHJ9 | VIQLGKMILQETGKNPVKYY  | Negative |
| Q2YHJ9 | GKMILQETGKNPVKYYGAYG  | Negative |
| Q2YHJ9 | IQLGKMILQETGKNPVKYYG  | Negative |
| Q2YHJ9 | GVEGSVIQLGKMILQETGKN  | Negative |
| Q2YHJ9 | WIMAVLLVGVEGSVIQLGKM  | Negative |
| Q2YHJ9 | KMILQETGKNPVKYYGAYGC  | Negative |
| Q2YHJ9 | VGVEGSVIQLGKMILQETGK  | Negative |
| Q2YHJ9 | LLVGVEGSVIQLGKMILQET  | Negative |
| Q30HU9 | DVVRTLILCVCLFGLTFAVP  | Negative |
| Q30HU9 | NELQCASGYVKGCHAGLCTC  | Negative |
| Q30HU9 | VVRTLILCVCLFGLTFAVPC  | Negative |
| Q30HU9 | TLILCVCLFGLTFAVPCIDG  | Negative |
| Q30HU9 | AVPCIDGVCTSNEQCASGY   | Negative |

|        |                       |          |
|--------|-----------------------|----------|
| Q30HU9 | LTFVPCIDGVCTSNEQCA    | Negative |
| Q30HU9 | FAVPCIDGVCTSNEQCASG   | Negative |
| Q30HU9 | VCLFGLTFAVPCIDGVCTSN  | Negative |
| Q30HU9 | TFAVPCIDGVCTSNEQCAS   | Negative |
| Q30HU9 | VRTLILCVCLFGLTFAVPCI  | Negative |
| Q30HU9 | PCIDGVCTSNEQCASGYVK   | Negative |
| Q30HU9 | DGVCTSNEQCASGYVKGCH   | Negative |
| Q30HU9 | FGLTFAVPCIDGVCTSNEQ   | Negative |
| Q30HU9 | LFGLTFAVPCIDGVCTSNE   | Negative |
| Q30HU9 | TSNEQCASGYVKGCHAGLC   | Negative |
| Q30HU9 | CVCLFGLTFAVPCIDGVCTS  | Negative |
| Q30HU9 | ILCVCLFGLTFAVPCIDGVC  | Negative |
| Q30HU9 | LCVCLFGLTFAVPCIDGVCT  | Negative |
| Q30HU9 | GVCTSNEQCASGYVKGCHA   | Negative |
| Q30HU9 | CTSNEQCASGYVKGCHAGL   | Negative |
| Q30HU9 | VCTSNEQCASGYVKGCHAG   | Negative |
| Q30HU9 | CIDGVCTSNEQCASGYVKG   | Negative |
| Q30HU9 | MDVVRTLILCVCLFGLTFAV  | Negative |
| Q30HU9 | CLFGLTFAVPCIDGVCTSNE  | Negative |
| Q30HU9 | LILCVCLFGLTFAVPCIDGV  | Negative |
| Q30HU9 | VPCIDGVCTSNEQCASGYV   | Negative |
| Q30HU9 | SNEQCASGYVKGCHAGLCT   | Negative |
| Q30HU9 | GLTFAVPCIDGVCTSNEQC   | Negative |
| Q30HU9 | IDGVCTSNEQCASGYVKG    | Negative |
| Q38L02 | EWSSHEGHHCYKVFLLKTWE  | Negative |
| Q38L02 | RFISVSFGLLVVFLSLSGTG  | Negative |
| Q38L02 | FLSLSGTGADCPSEWSSHEG  | Negative |
| Q38L02 | SVSFGLLVVFLSLSGTGADC  | Negative |
| Q38L02 | PSEWSSHEGHHCYKVFLLKT  | Negative |
| Q38L02 | LLVVFLSLSGTGADCPSEWS  | Negative |
| Q38L02 | VFLSLSGTGADCPSEWSSHE  | Negative |
| Q38L02 | WSSHEGHHCYKVFLLKTWED  | Negative |
| Q38L02 | GADCPSEWSSHEGHHCYKVK  | Negative |
| Q38L02 | LSLSGTGADCPSEWSSHEGH  | Negative |
| Q38L02 | ISVSFGLLVVFLSLSGTGAD  | Negative |
| Q38L02 | SEWSSHEGHHCYKVFLLKTW  | Negative |
| Q38L02 | SFGLLVVFLSLSGTGADCP   | Negative |
| Q38L02 | VVFLSLSGTGADCPSEWSSH  | Negative |
| Q38L02 | ADCPSEWSSHEGHHCYKVKL  | Negative |
| Q38L02 | DCPSEWSSHEGHHCYKVKLL  | Negative |
| Q38L02 | LSGTGADCPSEWSSHEGHHCY | Negative |
| Q38L02 | FISVSFGLLVVFLSLSGTGA  | Negative |
| Q38L02 | VSFGLLVVFLSLSGTGADCP  | Negative |
| Q38L02 | CPSEWSSHEGHHCYKVFLLK  | Negative |
| Q38L02 | GTGADCPSEWSSHEGHHCYK  | Negative |
| Q38L02 | SLSGTGADCPSEWSSHEGHHC | Negative |

|        |                       |          |
|--------|-----------------------|----------|
| Q38L02 | GRFISVSFGLLVVFLSLSGT  | Negative |
| Q38L02 | MGRFISVSFGLLVVFLSLSG  | Negative |
| Q38L02 | SGTGADCPSEWSSHEGHCHYK | Negative |
| Q38L02 | SSHEGHCHYKVFKLLKTWEDA | Negative |
| Q38L02 | GLLVVFLSLSGTGADCPSEW  | Negative |
| Q38L02 | LVVFLSLSGTGADCPSEWSS  | Negative |
| Q38L02 | TGADCPSEWSSHEGHCHYKVF | Negative |
| Q39527 | ITFYLLLLNKVNSEEALSFT  | Negative |
| Q39527 | LASITFYLLLLNKVNSEEA   | Negative |
| Q39527 | YLLLLNKVNSEEALSFTFTK  | Negative |
| Q39527 | HLLQTQKPFSVVLASITFY   | Negative |
| Q39527 | SNSRPHLLQTQKPFSVVLAI  | Negative |
| Q39527 | VLASITFYLLLLNKVNSEE   | Negative |
| Q39527 | PHLLQTQKPFSVVLASITF   | Negative |
| Q39527 | QTQKPFSVVLASITFYLLL   | Negative |
| Q39527 | ANSNSRPHLLQTQKPFSVVL  | Negative |
| Q39527 | LLLLNKVNSEEALSFTFTKF  | Negative |
| Q39527 | AISITFYLLLLNKVNSEEAL  | Negative |
| Q39527 | LQTQKPFSVVLASITFYLL   | Negative |
| Q39527 | RPHLLQTQKPFSVVLASIT   | Negative |
| Q39527 | KPFSVVLASITFYLLLLNK   | Negative |
| Q39527 | LLNKVNSEEALSFTFTKFV   | Negative |
| Q39527 | SVVLASITFYLLLLNKVNS   | Negative |
| Q39527 | LLQTQKPFSVVLASITFYLL  | Negative |
| Q39527 | QKPFSVVLASITFYLLLLN   | Negative |
| Q39527 | PFSVVLASITFYLLLLNKV   | Negative |
| Q39527 | NSNSRPHLLQTQKPFSVVL   | Negative |
| Q39527 | FYLLLLNKVNSEEALSFTFT  | Negative |
| Q39527 | LLNKVNSEEALSFTFTKFVS  | Negative |
| Q39527 | TQKPFSVVLASITFYLLLL   | Negative |
| Q39527 | NSRPHLLQTQKPFSVVLAI   | Negative |
| Q39527 | FSVVLASITFYLLLLNKVN   | Negative |
| Q39527 | SRPHLLQTQKPFSVVLASI   | Negative |
| Q39527 | VVLASITFYLLLLNKVNSE   | Negative |
| Q39527 | TFYLLLLNKVNSEEALSFTF  | Negative |
| Q39527 | SITFYLLLLNKVNSEEALS   | Negative |
| Q39528 | LHRVNSSDSLSTFNNFPN    | Negative |
| Q39528 | LSLPLAFITIYLMLLHRVN   | Negative |
| Q39528 | YLMLLHRVNSSDSLSTFNN   | Negative |
| Q39528 | LAFITIYLMLLHRVNSSDSL  | Negative |
| Q39528 | TNFLETKKPLSLPLAFITI   | Negative |
| Q39528 | NTNFLETKKPLSLPLAFIT   | Negative |
| Q39528 | SNTNFLETKKPLSLPLAFI   | Negative |
| Q39528 | ISNTNFLETKKPLSLPLAF   | Negative |
| Q39528 | PLSLPLAFITIYLMLLHRV   | Negative |
| Q39528 | MLLHRVNSSDSLSTFNNFP   | Negative |

|        |                        |          |
|--------|------------------------|----------|
| Q39528 | TISNTNFLETKKPLSLPLLA   | Negative |
| Q39528 | TKKPLSLPLLAFITIYLMML   | Negative |
| Q39528 | FLETKKPLSLPLLAFITIYL   | Negative |
| Q39528 | FITIYLMMLHRVNSSDSLSE   | Negative |
| Q39528 | KKPLSLPLLAFITIYLMMLH   | Negative |
| Q39528 | LPLLAFITIYLMMLHRVNSS   | Negative |
| Q39528 | KPLSLPLLAFITIYLMMLHR   | Negative |
| Q39528 | LLAFITIYLMMLHRVNSSDS   | Negative |
| Q39528 | TIYLMMLHRVNSSDSLSEFTF  | Negative |
| Q39528 | LMLLHRVNSSDSLSEFTFNNF  | Negative |
| Q39528 | ITIYLMMLHRVNSSDSLSEFT  | Negative |
| Q39528 | LLHRVNSSDSLSEFTFNNFPP  | Negative |
| Q39528 | LETKKPLSLPLLAFITIYLM   | Negative |
| Q39528 | ETKKPLSLPLLAFITIYLMML  | Negative |
| Q39528 | SLPLLAFITIYLMMLHRVNS   | Negative |
| Q39528 | IYLMMLHRVNSSDSLSEFTFN  | Negative |
| Q39528 | NFLETKKPLSLPLLAFITIY   | Negative |
| Q39528 | PLLAFITIYLMMLHRVNSSD   | Negative |
| Q39528 | MTISNTNFLETKKPLSLPLL   | Negative |
| Q39529 | LMLLN RVNSSDSLSEFTFDNF | Negative |
| Q39529 | KPISLPLLAFITLFLMMLNR   | Negative |
| Q39529 | LFLMMLNRVNSSDSLSEFTFD  | Negative |
| Q39529 | PISLPLLAFITLFLMMLNRV   | Negative |
| Q39529 | LPLLAFITLFLMMLNRVNSS   | Negative |
| Q39529 | ISLPLLAFITLFLMMLNRVN   | Negative |
| Q39529 | QTKKPISLPLLAFITLFLML   | Negative |
| Q39529 | TKKPISLPLLAFITLFLMML   | Negative |
| Q39529 | LLAFITLFLMMLNRVNSSDS   | Negative |
| Q39529 | NTNLLQTKKPISLPLLAFIT   | Negative |
| Q39529 | FITLFLMMLNRVNSSDSLSE   | Negative |
| Q39529 | AISNTNLLQTKKPISLPLLA   | Negative |
| Q39529 | MMLNRVNSSDSLSEFTFDNFR  | Negative |
| Q39529 | TNLLQTKKPISLPLLAFITL   | Negative |
| Q39529 | PLLAFITLFLMMLNRVNSSD   | Negative |
| Q39529 | ISNTNLLQTKKPISLPLLA    | Negative |
| Q39529 | MAISNTNLLQTKKPISLPLL   | Negative |
| Q39529 | LLNRVNSSDSLSEFTFDNFRP  | Negative |
| Q39529 | LAFITLFLMMLNRVNSSDSL   | Negative |
| Q39529 | TLFLMMLNRVNSSDSLSEFTF  | Negative |
| Q39529 | LN RVNSSDSLSEFTFDNFRPD | Negative |
| Q39529 | FLMMLNRVNSSDSLSEFTFDN  | Negative |
| Q39529 | LLQTKKPISLPLLAFITLFL   | Negative |
| Q39529 | ITLFLMMLNRVNSSDSLSEFT  | Negative |
| Q39529 | LQTKKPISLPLLAFITLFLM   | Negative |
| Q39529 | SNTNLLQTKKPISLPLLA     | Negative |
| Q39529 | NLLQTKKPISLPLLAFITLF   | Negative |

|        |                      |          |
|--------|----------------------|----------|
| Q39529 | KKPISLPLLAFITLFLMLLN | Negative |
| Q39529 | SLPLLAFITLFLMLLRVNS  | Negative |
| Q39649 | LLVADAYAYRTTITTVEVEE | Negative |
| Q39649 | ADAYAYRTTITTVEVEENRQ | Negative |
| Q39649 | LFAVALLVADAYAYRTTITT | Negative |
| Q39649 | TVEVEENRQGREERCQMSA  | Negative |
| Q39649 | AYRTTITTVEVEENRQGREE | Negative |
| Q39649 | VEVEENRQGREERCQMSAR  | Negative |
| Q39649 | FAVALLVADAYAYRTTITTV | Negative |
| Q39649 | AYAYRTTITTVEVEENRQGR | Negative |
| Q39649 | TITTVEVEENRQGREERCQ  | Negative |
| Q39649 | YRTTITTVEVEENRQGREER | Negative |
| Q39649 | ALFAVALLVADAYAYRTTIT | Negative |
| Q39649 | LTSIIALFAVALLVADAYAY | Negative |
| Q39649 | RTTITTVEVEENRQGREERC | Negative |
| Q39649 | TTITTVEVEENRQGREERC  | Negative |
| Q39649 | VADAYAYRTTITTVEVEENR | Negative |
| Q39649 | AVALLVADAYAYRTTITVE  | Negative |
| Q39649 | YAYRTTITTVEVEENRQGRE | Negative |
| Q39649 | IIALFAVALLVADAYAYRTT | Negative |
| Q39649 | ALLVADAYAYRTTITTVEVE | Negative |
| Q39649 | RLTSIIALFAVALLVADAYA | Negative |
| Q39649 | ARLTSIIALFAVALLVADAY | Negative |
| Q39649 | TTVEVEENRQGREERCQMS  | Negative |
| Q39649 | SIIALFAVALLVADAYAYRT | Negative |
| Q39649 | VALLVADAYAYRTTITTVEV | Negative |
| Q39649 | DAYAYRTTITTVEVEENRQG | Negative |
| Q39649 | TSIIALFAVALLVADAYAYR | Negative |
| Q39649 | LVADAYAYRTTITTVEVEEN | Negative |
| Q39649 | ITTVEVEENRQGREERCQRM | Negative |
| Q39649 | MARLTSIIALFAVALLVADA | Negative |
| Q39688 | ETFKFVNEGELGQYISEYFG | Negative |
| Q39688 | PANETFKFVNEGELGQYISE | Negative |
| Q39688 | MARFFPLTLTILLFFIQRID | Negative |
| Q39688 | IDFCHTLVPANETFKFVNEG | Negative |
| Q39688 | IQRIDFCHTLVPANETFKFV | Negative |
| Q39688 | LTLTILLFFIQRIDFCHTLV | Negative |
| Q39688 | CHTLVPANETFKFVNEGELG | Negative |
| Q39688 | VPANETFKFVNEGELGQYIS | Negative |
| Q39688 | DFCHTLVPANETFKFVNEGE | Negative |
| Q39688 | LTILLFFIQRIDFCHTLVPA | Negative |
| Q39688 | TLTILLFFIQRIDFCHTLVP | Negative |
| Q39688 | FPLTLTILLFFIQRIDFCHT | Negative |
| Q39688 | RFFPLTLTILLFFIQRIDFC | Negative |
| Q39688 | LVPANETFKFVNEGELGQYI | Negative |
| Q39688 | FFPLTLTILLFFIQRIDFCH | Negative |

|        |                       |          |
|--------|-----------------------|----------|
| Q39688 | LLFFIQRIDFCHTLVPANET  | Negative |
| Q39688 | ILLFFIQRIDFCHTLVPANE  | Negative |
| Q39688 | ANETFKFVNEGELGQYISEY  | Negative |
| Q39688 | RIDFCHTLVPANETFKFVNE  | Negative |
| Q39688 | PLTLTILLFFIQRIDFCHTL  | Negative |
| Q39688 | HTLVPANETFKFVNEGELGQ  | Negative |
| Q39688 | LFFIQRIDFCHTLVPANETF  | Negative |
| Q39688 | TLVPANETFKFVNEGELGQY  | Negative |
| Q39688 | QRIDFCHTLVPANETFKFVN  | Negative |
| Q39688 | FCHTLVPANETFKFVNEGEL  | Negative |
| Q39688 | ARFFPLTLILLFFIQRIDF   | Negative |
| Q39688 | NETFKFVNEGELGQYISEYF  | Negative |
| Q39688 | FFIQRIDFCHTLVPANETFK  | Negative |
| Q39688 | FIQRIDFCHTLVPANETFKF  | Negative |
| Q39962 | SFLKDRHFCSADPTDGFTEV  | Negative |
| Q39962 | CSFALLLLVSFLKDRHFCSA  | Negative |
| Q39962 | YCFCCSFALLLLVSFLKDRH  | Negative |
| Q39962 | FCSADPTDGFTEVPLTEDNF  | Negative |
| Q39962 | MKRSPYCFCCSFALLLLVSF  | Negative |
| Q39962 | SADPTDGFTEVPLTEDNFVI  | Negative |
| Q39962 | PYCFCCSFALLLLVSFLKDR  | Negative |
| Q39962 | CFCCSFALLLLVSFLKDRHF  | Negative |
| Q39962 | SPYCFCCSFALLLLVSFLKD  | Negative |
| Q39962 | MKMKRSPYCFCCSFALLLLV  | Negative |
| Q39962 | LLLLVSFLKDRHFCSADPTD  | Negative |
| Q39962 | VSFLKDRHFCSADPTDGFTE  | Negative |
| Q39962 | KRSPYCFCCSFALLLLVSFL  | Negative |
| Q39962 | FLKDRHFCSADPTDGFTEVP  | Negative |
| Q39962 | LVSFLKDRHFCSADPTDGFT  | Negative |
| Q39962 | RHFCSADPTDGFTEVPLTED  | Negative |
| Q39962 | FCCSFALLLLVSFLKDRHFC  | Negative |
| Q39962 | HFCSADPTDGFTEVPLTEDN  | Negative |
| Q39962 | ALLLLVSFLKDRHFCSADPT  | Negative |
| Q39962 | FALLLLVSFLKDRHFCSADP  | Negative |
| Q39962 | CSADPTDGFTEVPLTEDNFV  | Negative |
| Q39962 | LKDRHFCSADPTDGFTEVPL  | Negative |
| Q39962 | SFALLLLVSFLKDRHFCSAD  | Negative |
| Q39962 | CCSFALLLLVSFLKDRHFCS  | Negative |
| Q39962 | KDRHFCSADPTDGFTEVPLT  | Negative |
| Q39962 | LLVSFLKDRHFCSADPTDGF  | Negative |
| Q39962 | RSPYCFCCSFALLLLVSFLK  | Negative |
| Q39962 | KMKRSPYCFCCSFALLLLVS  | Negative |
| Q39962 | DRHFCSADPTDGFTEVPLTE  | Negative |
| Q3C258 | TPDGTWVKCRHDCFTKYKSC  | Negative |
| Q3C258 | ESSSTPDGTWVKCRHDCFTK  | Negative |
| Q3C258 | MNQVMTIFLVLGIVIVYSVES | Negative |

|        |                      |          |
|--------|----------------------|----------|
| Q3C258 | VYSVESSTPDGTWVKCRHD  | Negative |
| Q3C258 | VMTIFLVLGVIVYSVESSST | Negative |
| Q3C258 | GTWVKCRHDCFTKYKSCQMS | Negative |
| Q3C258 | LVLGVIVYSVESSSTPDGTW | Negative |
| Q3C258 | VKCRHDCFTKYKSCQMSDSC | Negative |
| Q3C258 | SSTPDGTWVKCRHDCFTKYK | Negative |
| Q3C258 | IFLVLGVIVYSVESSSTPDG | Negative |
| Q3C258 | QVMTIFLVLGVIVYSVESSS | Negative |
| Q3C258 | SVESSSTPDGTWVKCRHDCF | Negative |
| Q3C258 | NQVMTIFLVLGVIVYSVESS | Negative |
| Q3C258 | TWVKCRHDCFTKYKSCQMSD | Negative |
| Q3C258 | GVIVYSVESSSTPDGTWVKC | Negative |
| Q3C258 | VESSSTPDGTWVKCRHDCFT | Negative |
| Q3C258 | FLVLGVIVYSVESSSTPDGT | Negative |
| Q3C258 | PDGTWVKCRHDCFTKYKSCQ | Negative |
| Q3C258 | VLGVIVYSVESSSTPDGTWV | Negative |
| Q3C258 | KCRHDCFTKYKSCQMSDSCH | Negative |
| Q3C258 | LGVIVYSVESSSTPDGTWVK | Negative |
| Q3C258 | MTIFLVLGVIVYSVESSSTP | Negative |
| Q3C258 | VIVYSVESSSTPDGTWVKCR | Negative |
| Q3C258 | YSVESSTPDGTWVKCRHDC  | Negative |
| Q3C258 | STPDGTWVKCRHDCFTKYKS | Negative |
| Q3C258 | WVKCRHDCFTKYKSCQMSDS | Negative |
| Q3C258 | SSSTPDGTWVKCRHDCFTKY | Negative |
| Q3C258 | DGTWVKCRHDCFTKYKSCQM | Negative |
| Q3C258 | IVYSVESSSTPDGTWVKCRH | Negative |
| Q3HLQ4 | FRKMIKKMTGKEPILSYATY | Negative |
| Q3HLQ4 | IMAVLLLGVEGNLLQFRKMI | Negative |
| Q3HLQ4 | TGKEPILSYATYGCNCGMAG | Negative |
| Q3HLQ4 | TLWIMAVLLLGVEGNLLQFR | Negative |
| Q3HLQ4 | MAVLLLGVEGNLLQFRKMIK | Negative |
| Q3HLQ4 | GKEPILSYATYGCNCGMAGV | Negative |
| Q3HLQ4 | VEGNLLQFRKMIKKMTGKEP | Negative |
| Q3HLQ4 | EGNLLQFRKMIKKMTGKEPI | Negative |
| Q3HLQ4 | KMTGKEPILSYATYGCNCGM | Negative |
| Q3HLQ4 | KMIKKMTGKEPILSYATYGC | Negative |
| Q3HLQ4 | MTGKEPILSYATYGCNCGMA | Negative |
| Q3HLQ4 | AVLLLGVEGNLLQFRKMIKK | Negative |
| Q3HLQ4 | NLLQFRKMIKKMTGKEPILS | Negative |
| Q3HLQ4 | GVEGNLLQFRKMIKKMTGKE | Negative |
| Q3HLQ4 | MIKKMTGKEPILSYATYGCN | Negative |
| Q3HLQ4 | LGVEGNLLQFRKMIKKMTGK | Negative |
| Q3HLQ4 | WIMAVLLLGVEGNLLQFRKM | Negative |
| Q3HLQ4 | LLGVEGNLLQFRKMIKKMTG | Negative |
| Q3HLQ4 | MRTLWIMAVLLLGVEGNLLQ | Negative |
| Q3HLQ4 | KKMTGKEPILSYATYGCNCG | Negative |



|        |                      |          |
|--------|----------------------|----------|
| Q3HLQ4 | GNLLQFRKMIKKMTGKEPIL | Negative |
| Q3HLQ4 | LQFRKMIKKMTGKEPILSYA | Negative |
| Q3HLQ4 | VLLLGVEGNLLQFRKMIKKM | Negative |
| Q3HLQ4 | LWIMAVLLLGVEGNLLQFRK | Negative |
| Q3HLQ4 | RKMIKKMTGKEPILSYATYG | Negative |
| Q3HLQ4 | LLQFRKMIKKMTGKEPILSY | Negative |
| Q3HLQ4 | IKKMTGKEPILSYATYGCNC | Negative |
| Q3HLQ4 | QFRKMIKKMTGKEPILSYAT | Negative |
| Q3HLQ4 | LLLGVEGNLLQFRKMIKKMT | Negative |
| Q3J164 | VKALAAIAAFAALPALAQEG | Negative |
| Q3J164 | AAFAALPALAQEGDPEAGAK | Negative |
| Q3J164 | LAQEGDPEAGAKAFNQCQTC | Negative |
| Q3J164 | EAGAKAFNQCQTCHVIVDDS | Negative |
| Q3J164 | KFQVKALAAIAAFAALPALA | Negative |
| Q3J164 | ALPALAQEGDPEAGAKAFNQ | Negative |
| Q3J164 | LAAIAAFAALPALAQEGDPE | Negative |
| Q3J164 | FQVKALAAIAAFAALPALAQ | Negative |
| Q3J164 | QVKALAAIAAFAALPALAQE | Negative |
| Q3J164 | AAIAAFAALPALAQEGDPEA | Negative |
| Q3J164 | IAAFAALPALAQEGDPEAGA | Negative |
| Q3J164 | AKAFNQCQTCHVIVDDSGTT | Negative |
| Q3J164 | AALPALAQEGDPEAGAKAFN | Negative |
| Q3J164 | FAALPALAQEGDPEAGAKAF | Negative |
| Q3J164 | LPALAQEGDPEAGAKAFNQC | Negative |
| Q3J164 | GAKAFNQCQTCHVIVDDSGT | Negative |
| Q3J164 | QEGDPEAGAKAFNQCQTCHV | Negative |
| Q3J164 | KALAAIAAFAALPALAQEGD | Negative |
| Q3J164 | GDPEAGAKAFNQCQTCHVIV | Negative |
| Q3J164 | AIAAFAALPALAQEGDPEAG | Negative |
| Q3J164 | DPEAGAKAFNQCQTCHVIVD | Negative |
| Q3J164 | ALAQEGDPEAGAKAFNQCQT | Negative |
| Q3J164 | AGAKAFNQCQTCHVIVDDSG | Negative |
| Q3J164 | EGDPEAGAKAFNQCQTCHVI | Negative |
| Q3J164 | AQEGDPEAGAKAFNQCQTCH | Negative |
| Q3J164 | AFAALPALAQEGDPEAGAKA | Negative |
| Q3J164 | PEAGAKAFNQCQTCHVIVDD | Negative |
| Q3J164 | PALAQEGDPEAGAKAFNQCQ | Negative |
| Q3J164 | MKFQVKALAAIAAFAALPAL | Negative |
| Q3L1D1 | ALLGIQVARSAITYQNPTDL | Negative |
| Q3L1D1 | MIPRVAKFNFRLLSLALLGI | Negative |
| Q3L1D1 | QNPTDLPGDVDYDFIVAGGG | Negative |
| Q3L1D1 | KFNFRLLSLALLGIQVARSA | Negative |
| Q3L1D1 | TYQNPTDLPGDVDYDFIVAG | Negative |
| Q3L1D1 | AITYQNPTDLPGDVDYDFIV | Negative |
| Q3L1D1 | NFRLLSLALLGIQVARSAIT | Negative |
| Q3L1D1 | AKFNFRLLSLALLGIQVARS | Negative |

|        |                       |          |
|--------|-----------------------|----------|
| Q3L1D1 | YQNPTDLP GDVDYDFIVAGG | Negative |
| Q3L1D1 | QVARSAITYQNPTDLP GDVD | Negative |
| Q3L1D1 | IQVARSAITYQNPTDLP GDV | Negative |
| Q3L1D1 | LLGIQVARSAITYQNPTDLP  | Negative |
| Q3L1D1 | SLALLGIQVARSAITYQNPT  | Negative |
| Q3L1D1 | PRVAKFNFRLLSLALLGIQV  | Negative |
| Q3L1D1 | IPRVAKFNFRLLSLALLGIQ  | Negative |
| Q3L1D1 | LALLGIQVARSAITYQNPTD  | Negative |
| Q3L1D1 | LLSLALLGIQVARSAITYQN  | Negative |
| Q3L1D1 | RSAITYQNPTDLP GDVDYDF | Negative |
| Q3L1D1 | ITYQNPTDLP GDVDYDFIVA | Negative |
| Q3L1D1 | GIQVARSAITYQNPTDLP GD | Negative |
| Q3L1D1 | RVAKFNFRLLSLALLGIQVA  | Negative |
| Q3L1D1 | LSLALLGIQVARSAITYQNP  | Negative |
| Q3L1D1 | VAKFNFRLLSLALLGIQVAR  | Negative |
| Q3L1D1 | FNRLLSLALLGIQVARSAI   | Negative |
| Q3L1D1 | LGIQVARSAITYQNPTDLPG  | Negative |
| Q3L1D1 | ARSAITYQNPTDLP GDVDYD | Negative |
| Q3L1D1 | SAITYQNPTDLP GDVDYDFI | Negative |
| Q3L1D1 | VARSAITYQNPTDLP GDVDY | Negative |
| Q3L1D1 | FRLLSLALLGIQVARSAITY  | Negative |
| Q3L245 | ITYQHPDDLPSGVDYDFIVA  | Negative |
| Q3L245 | SRLLSLALLGIQIARGAITY  | Negative |
| Q3L245 | IARGAITYQHPDDLPSGVDY  | Negative |
| Q3L245 | LPRVTKLNSRLLSLALLGIQ  | Negative |
| Q3L245 | TYQHPDDLPSGVDYDFIVAG  | Negative |
| Q3L245 | LNSRLLSLALLGIQIARGAI  | Negative |
| Q3L245 | SLALLGIQIARGAITYQHPD  | Negative |
| Q3L245 | QHPDDLPSGVDYDFIVAGGG  | Negative |
| Q3L245 | LGIQIARGAITYQHPDDLPS  | Negative |
| Q3L245 | IQIARGAITYQHPDDLPSGV  | Negative |
| Q3L245 | AITYQHPDDLPSGVDYDFIV  | Negative |
| Q3L245 | LSLALLGIQIARGAITYQHP  | Negative |
| Q3L245 | LALLGIQIARGAITYQHPDD  | Negative |
| Q3L245 | LLGIQIARGAITYQHPDDL   | Negative |
| Q3L245 | YQHPDDLPSGVDYDFIVAGG  | Negative |
| Q3L245 | RVTKLNSRLLSLALLGIQIA  | Negative |
| Q3L245 | RGAITYQHPDDLPSGVDYDF  | Negative |
| Q3L245 | PRVTKLNSRLLSLALLGIQI  | Negative |
| Q3L245 | ALLGIQIARGAITYQHPDDL  | Negative |
| Q3L245 | MLPRVTKLNSRLLSLALLGI  | Negative |
| Q3L245 | TKLNSRLLSLALLGIQIARG  | Negative |
| Q3L245 | GIQIARGAITYQHPDDLPSG  | Negative |
| Q3L245 | NSRLLSLALLGIQIARGAIT  | Negative |
| Q3L245 | VTKLNSRLLSLALLGIQIAR  | Negative |
| Q3L245 | GAITYQHPDDLPSGVDYDFI  | Negative |

|        |                      |          |
|--------|----------------------|----------|
| Q3L245 | QIARGAITYQHPDDLPSGVD | Negative |
| Q3L245 | KLNSRLLSLALLGIQIARGA | Negative |
| Q3L245 | LLSLALLGIQIARGAITYQH | Negative |
| Q3L245 | ARGAITYQHPDDLPSGVDYD | Negative |
| Q3MUH7 | LWMASLAVALAAGSFAALPE | Negative |
| Q3MUH7 | AGSFAALPEMTSAAPSEPYT | Negative |
| Q3MUH7 | KKLWMASLAVALAAGSFAAL | Negative |
| Q3MUH7 | GKKLWMASLAVALAAGSFAA | Negative |
| Q3MUH7 | FLGKKLWMASLAVALAAGSF | Negative |
| Q3MUH7 | TFLGKKLWMASLAVALAAGS | Negative |
| Q3MUH7 | LAVALAAGSFAALPEMTSAA | Negative |
| Q3MUH7 | WMASLAVALAAGSFAALPEM | Negative |
| Q3MUH7 | SFAALPEMTSAAPSEPYTWK | Negative |
| Q3MUH7 | ALAAGSFAALPEMTSAAPSE | Negative |
| Q3MUH7 | EMTSAAPSEPYTWKNVVTGA | Negative |
| Q3MUH7 | MASLAVALAAGSFAALPEMT | Negative |
| Q3MUH7 | ASLAVALAAGSFAALPEMTS | Negative |
| Q3MUH7 | SLAVALAAGSFAALPEMTSA | Negative |
| Q3MUH7 | MTSAAPSEPYTWKNVVTGAG | Negative |
| Q3MUH7 | PEMTSAAPSEPYTWKNVVTG | Negative |
| Q3MUH7 | FAALPEMTSAAPSEPYTWKN | Negative |
| Q3MUH7 | AALPEMTSAAPSEPYTWKNV | Negative |
| Q3MUH7 | KLWMASLAVALAAGSFAALP | Negative |
| Q3MUH7 | GSFAALPEMTSAAPSEPYTW | Negative |
| Q3MUH7 | AVALAAGSFAALPEMTSAAP | Negative |
| Q3MUH7 | LGKKLWMASLAVALAAGSFA | Negative |
| Q3MUH7 | LPEMTSAAPSEPYTWKNVVT | Negative |
| Q3MUH7 | VALAAGSFAALPEMTSAAPS | Negative |
| Q3MUH7 | ALPEMTSAAPSEPYTWKNVV | Negative |
| Q3MUH7 | TSAAPSEPYTWKNVVTGAGG | Negative |
| Q3MUH7 | KTFLGKKLWMASLAVALAAG | Negative |
| Q3MUH7 | AAGSFAALPEMTSAAPSEPY | Negative |
| Q3MUH7 | MKTFLGKKLWMASLAVALAA | Negative |
| Q3UN54 | FLQALTCVSCGRLNSSGICE | Negative |
| Q3UN54 | QALTCVSCGRLNSSGICETA | Negative |
| Q3UN54 | CVSCGRLNSSGICETAETSC | Negative |
| Q3UN54 | LLLLLLGIFLRVGFLQALTC | Negative |
| Q3UN54 | LLLLLGIFLRVGFLQALTCV | Negative |
| Q3UN54 | RVGFLQALTCVSCGRLNSSG | Negative |
| Q3UN54 | LRVGFLQALTCVSCGRLNSS | Negative |
| Q3UN54 | RLNSSGICETAETSCEATNN | Negative |
| Q3UN54 | VGFLQALTCVSCGRLNSSGI | Negative |
| Q3UN54 | GRLNSSGICETAETSCEATN | Negative |
| Q3UN54 | KYLLLLLLGIFLRVGFLQAL | Negative |
| Q3UN54 | IFLRVGFLQALTCVSCGRLN | Negative |
| Q3UN54 | LLLGIFLRVGFLQALTCVSC | Negative |

|        |                       |          |
|--------|-----------------------|----------|
| Q3UN54 | TCVSCGRLNSSGICETAETS  | Negative |
| Q3UN54 | LGIFLRVGFLQALTCVSCGR  | Negative |
| Q3UN54 | YLLLLLLGIFLRVGFLQALT  | Negative |
| Q3UN54 | VSCGRLNSSGICETAETSCE  | Negative |
| Q3UN54 | SCGRLNSSGICETAETSCEA  | Negative |
| Q3UN54 | EKYLLLLLLGIFLRVGFLQA  | Negative |
| Q3UN54 | LQALTCVSCGRLNSSGICET  | Negative |
| Q3UN54 | MEKYLLLLLLGIFLRVGFLQ  | Negative |
| Q3UN54 | LNSSGICETAETSCEATNNR  | Negative |
| Q3UN54 | GFLQALTCVSCGRLNSSGIC  | Negative |
| Q3UN54 | FLRVGFLQALTCVSCGRLNS  | Negative |
| Q3UN54 | CGRLNSSGICETAETSCEAT  | Negative |
| Q3UN54 | ALTCVSCGRLNSSGICETAE  | Negative |
| Q3UN54 | LTCVSCGRLNSSGICETAET  | Negative |
| Q3UN54 | GIFLRVGFLQALTCVSCGRL  | Negative |
| Q3UN54 | LLGIFLRVGFLQALTCVSCG  | Negative |
| Q3V1G4 | TTPPTGTSEPPDVQTVEPTE  | Negative |
| Q3V1G4 | CFALVVAQVWGSTTPPTGTS  | Negative |
| Q3V1G4 | LCFALVVAQVWGSTTPPTGT  | Negative |
| Q3V1G4 | QVWGSTTPPTGTSEPPDVQT  | Negative |
| Q3V1G4 | VAQVWGSTTPPTGTSEPPDV  | Negative |
| Q3V1G4 | LPLVLCFALVVAQVWGSTTP  | Negative |
| Q3V1G4 | LVVAQVWGSTTPPTGTSEPP  | Negative |
| Q3V1G4 | WGSTTPPTGTSEPPDVQTVE  | Negative |
| Q3V1G4 | ALVVAQVWGSTTPPTGTSEP  | Negative |
| Q3V1G4 | PLPLVLCFALVVAQVWGSTT  | Negative |
| Q3V1G4 | PPTGTSEPPDVQTVEPTEDD  | Negative |
| Q3V1G4 | EPPDVQTVEPTEDDILQNEA  | Negative |
| Q3V1G4 | LVLFCFALVVAQVWGSTTPPT | Negative |
| Q3V1G4 | TSEPPDVQTVEPTEDDILQN  | Negative |
| Q3V1G4 | TGTSEPPDVQTVEPTEDDIL  | Negative |
| Q3V1G4 | AQVWGSTTPPTGTSEPPDVQ  | Negative |
| Q3V1G4 | MAYPLPLVLCFALVVAQVWG  | Negative |
| Q3V1G4 | VVAQVWGSTTPPTGTSEPPD  | Negative |
| Q3V1G4 | FALVVAQVWGSTTPPTGTSE  | Negative |
| Q3V1G4 | GSTTPPTGTSEPPDVQTVEP  | Negative |
| Q3V1G4 | YPLPLVLCFALVVAQVWGST  | Negative |
| Q3V1G4 | STTPPTGTSEPPDVQTVEPT  | Negative |
| Q3V1G4 | PTGTSEPPDVQTVEPTEDDI  | Negative |
| Q3V1G4 | VWGSTTPPTGTSEPPDVQTV  | Negative |
| Q3V1G4 | SEPPDVQTVEPTEDDILQNE  | Negative |
| Q3V1G4 | TPPTGTSEPPDVQTVEPTED  | Negative |
| Q3V1G4 | GTSEPPDVQTVEPTEDDILQ  | Negative |
| Q3V1G4 | AYPLPLVLCFALVVAQVWGS  | Negative |
| Q3V1G4 | VLCFALVVAQVWGSTTPPTG  | Negative |
| Q3Y5Z3 | MLLQGALLLLALPSHGEDN   | Negative |

|        |                      |          |
|--------|----------------------|----------|
| Q3Y5Z3 | ACAGWMAGIPGHPGHNGTPG | Negative |
| Q3Y5Z3 | EDPPLPKGACAGWMAGIPGH | Negative |
| Q3Y5Z3 | LLQGALLLLLALPSHGEDNM | Negative |
| Q3Y5Z3 | KGACAGWMAGIPGHPGHNGT | Negative |
| Q3Y5Z3 | HGEDNMEDPPLPKGACAGWM | Negative |
| Q3Y5Z3 | QGALLLLLALPSHGEDNMED | Negative |
| Q3Y5Z3 | NMEDPPLPKGACAGWMAGIP | Negative |
| Q3Y5Z3 | LPKGACAGWMAGIPGHPGHN | Negative |
| Q3Y5Z3 | MEDPPLPKGACAGWMAGIPG | Negative |
| Q3Y5Z3 | ALPSHGEDNMEDPPLPKGAC | Negative |
| Q3Y5Z3 | ALLLLLALPSHGEDNMEDPP | Negative |
| Q3Y5Z3 | PSHGEDNMEDPPLPKGACAG | Negative |
| Q3Y5Z3 | PLPKGACAGWMAGIPGHPGH | Negative |
| Q3Y5Z3 | DNMEDPPLPKGACAGWMAGI | Negative |
| Q3Y5Z3 | GALLLLLALPSHGEDNMEDP | Negative |
| Q3Y5Z3 | PKGACAGWMAGIPGHPGHNG | Negative |
| Q3Y5Z3 | LLLALPSHGEDNMEDPPLPK | Negative |
| Q3Y5Z3 | EDNMEDPPLPKGACAGWMAG | Negative |
| Q3Y5Z3 | LLLLLALPSHGEDNMEDPPL | Negative |
| Q3Y5Z3 | LALPSHGEDNMEDPPLPKGA | Negative |
| Q3Y5Z3 | SHGEDNMEDPPLPKGACAGW | Negative |
| Q3Y5Z3 | GACAGWMAGIPGHPGHNGTP | Negative |
| Q3Y5Z3 | GEDNMEDPPLPKGACAGWMA | Negative |
| Q3Y5Z3 | PPLPKGACAGWMAGIPGHPG | Negative |
| Q3Y5Z3 | LPSHGEDNMEDPPLPKGACA | Negative |
| Q3Y5Z3 | LLLLALPSHGEDNMEDPPLP | Negative |
| Q3Y5Z3 | LLALPSHGEDNMEDPPLPKG | Negative |
| Q3Y5Z3 | DPPLPKGACAGWMAGIPGHP | Negative |
| Q3YBN2 | ETTTNPEAYMKVSKIYNHWG | Negative |
| Q3YBN2 | NIFCLFETTTNPEAYMKVSK | Negative |
| Q3YBN2 | MSWLLSTMCLVHVCGNIFCL | Negative |
| Q3YBN2 | CLFETTTNPEAYMKVSKIYN | Negative |
| Q3YBN2 | VHVCGNIFCLFETTTNPEAY | Negative |
| Q3YBN2 | YMKVSKIYNHWGYTSEEYEA | Negative |
| Q3YBN2 | TTNPEAYMKVSKIYNHWGYT | Negative |
| Q3YBN2 | AYMKVSKIYNHWGYTSEEYE | Negative |
| Q3YBN2 | GNIFCLFETTTNPEAYMKVS | Negative |
| Q3YBN2 | IFCLFETTTNPEAYMKVSKI | Negative |
| Q3YBN2 | HVCGNIFCLFETTTNPEAYM | Negative |
| Q3YBN2 | MCLVHVCGNIFCLFETTTNP | Negative |
| Q3YBN2 | STMCLVHVCGNIFCLFETTT | Negative |
| Q3YBN2 | LVHVCGNIFCLFETTTNPEA | Negative |
| Q3YBN2 | FCLFETTTNPEAYMKVSKIY | Negative |
| Q3YBN2 | TNPEAYMKVSKIYNHWGYTS | Negative |
| Q3YBN2 | CGNIFCLFETTTNPEAYMKV | Negative |
| Q3YBN2 | NPEAYMKVSKIYNHWGYTSE | Negative |

|        |                      |          |
|--------|----------------------|----------|
| Q3YBN2 | SWLLSTMCLVHVCGNIFCLF | Negative |
| Q3YBN2 | LFETTTNPEAYMKVSKIVNH | Negative |
| Q3YBN2 | EAYMKVSKIVNHWGYTSEEY | Negative |
| Q3YBN2 | TMCLVHVCGNIFCLFETTTN | Negative |
| Q3YBN2 | FETTTNPEAYMKVSKIVNHW | Negative |
| Q3YBN2 | PEAYMKVSKIVNHWGYTSEE | Negative |
| Q3YBN2 | WLLSTMCLVHVCGNIFCLFE | Negative |
| Q3YBN2 | VCGNIFCLFETTTNPEAYMK | Negative |
| Q3YBN2 | LLSTMCLVHVCGNIFCLFET | Negative |
| Q3YBN2 | TTTNPEAYMKVSKIVNHWGY | Negative |
| Q3YBN2 | CLVHVCGNIFCLFETTTNPE | Negative |
| Q3YJT5 | MILATTSSTFATLGEMVTVL | Negative |
| Q3YJT5 | STFATLGEMVTVLSIDGGGI | Negative |
| Q3YJT5 | TVLSIDGGGIKGIIPGIILE | Negative |
| Q3YJT5 | SSTFATLGEMVTVLSIDGGG | Negative |
| Q3YJT5 | ATLGEMVTVLSIDGGGIKGI | Negative |
| Q3YJT5 | TKSVLVLIFMILATTSSTFA | Negative |
| Q3YJT5 | LIFMILATTSSTFATLGEMV | Negative |
| Q3YJT5 | TSSTFATLGEMVTVLSIDGG | Negative |
| Q3YJT5 | LGEMVTVLSIDGGGIKGIIP | Negative |
| Q3YJT5 | MATTKSVLVLIFMILATTSS | Negative |
| Q3YJT5 | FATLGEMVTVLSIDGGGIKG | Negative |
| Q3YJT5 | KSVLVLIFMILATTSSTFAT | Negative |
| Q3YJT5 | FMILATTSSTFATLGEMVTV | Negative |
| Q3YJT5 | ILATTSSTFATLGEMVTVLS | Negative |
| Q3YJT5 | IFMILATTSSTFATLGEMVT | Negative |
| Q3YJT5 | TTKSVLVLIFMILATTSSTF | Negative |
| Q3YJT5 | MVTVLSIDGGGIKGIIPGII | Negative |
| Q3YJT5 | GEMVTVLSIDGGGIKGIIPG | Negative |
| Q3YJT5 | TTSSTFATLGEMVTVLSIDG | Negative |
| Q3YJT5 | ATTSSTFATLGEMVTVLSID | Negative |
| Q3YJT5 | ATTKSVLVLIFMILATTSST | Negative |
| Q3YJT5 | SVLVLIFMILATTSSTFATL | Negative |
| Q3YJT5 | LATTSSTFATLGEMVTVLSI | Negative |
| Q3YJT5 | EMVTVLSIDGGGIKGIIPGI | Negative |
| Q3YJT5 | LVLIFMILATTSSTFATLGE | Negative |
| Q3YJT5 | TFATLGEMVTVLSIDGGGIK | Negative |
| Q3YJT5 | VTVLSIDGGGIKGIIPGIIL | Negative |
| Q3YJT5 | TLGEMVTVLSIDGGGIKGII | Negative |
| Q3YJT5 | VLVLIFMILATTSSTFATLG | Negative |
| Q40772 | EVVGLAISIWMLTPPASSN  | Negative |
| Q40772 | LEVVGLAISIWMLTPPASS  | Negative |
| Q40772 | MLTPPASSNIVFDVENATPE | Negative |
| Q40772 | SSNIVFDVENATPETYSNFL | Negative |
| Q40772 | MKMKVLEVVGLAISIWMLT  | Negative |
| Q40772 | KMKVLEVVGLAISIWMLTP  | Negative |

|        |                        |          |
|--------|------------------------|----------|
| Q40772 | DVENATPETYSNFLTSLREA   | Negative |
| Q40772 | GLAISIWMLMLTPPASSNIVF  | Negative |
| Q40772 | ISIWMLMLTPPASSNIVFDVE  | Negative |
| Q40772 | VGLAISIWMLMLTPPASSNIV  | Negative |
| Q40772 | TPPASSNIVFDVENATPETY   | Negative |
| Q40772 | VFDVENATPETYSNFLTSLR   | Negative |
| Q40772 | PPASSNIVFDVENATPETYS   | Negative |
| Q40772 | ASSNIVFDVENATPETYSNF   | Negative |
| Q40772 | KVLEVVGGLAISIWMLMLTPPA | Negative |
| Q40772 | LMLTPPASSNIVFDVENATP   | Negative |
| Q40772 | SIWLMLMLTPPASSNIVFDVEN | Negative |
| Q40772 | IWLMLMLTPPASSNIVFDVENA | Negative |
| Q40772 | IVFDVENATPETYSNFLTSL   | Negative |
| Q40772 | FDVENATPETYSNFLTSLRE   | Negative |
| Q40772 | SNIVFDVENATPETYSNFLT   | Negative |
| Q40772 | MKVLEVVGGLAISIWMLMLTPP | Negative |
| Q40772 | WLMLTPPASSNIVFDVENAT   | Negative |
| Q40772 | NIVFDVENATPETYSNFLTSL  | Negative |
| Q40772 | VLEVVGGLAISIWMLMLTPPAS | Negative |
| Q40772 | PASSNIVFDVENATPETYSN   | Negative |
| Q40772 | LTPPASSNIVFDVENATPET   | Negative |
| Q40772 | VVGLAISIWMLMLTPPASSNI  | Negative |
| Q40772 | AISIWMLMLTPPASSNIVFDV  | Negative |
| Q41015 | VFITNLSLAFSNEDVEQVLD   | Negative |
| Q41015 | NEDVEQVLDNFNGNPIFPGVQ  | Negative |
| Q41015 | MKPLSPLTLSFFLFVFITNL   | Negative |
| Q41015 | EQVLDNFNGNPIFPGVQYFIL  | Negative |
| Q41015 | SPLTLSFFLFVFITNLSLAF   | Negative |
| Q41015 | LSLAFSNEDVEQVLDNFNGNP  | Negative |
| Q41015 | SNEDVEQVLDNFNGNPIFPGV  | Negative |
| Q41015 | SLAFSNEDVEQVLDNFNGNPI  | Negative |
| Q41015 | LSFFLFVFITNLSLAFSNED   | Negative |
| Q41015 | LAFSNEDVEQVLDNFNGNPIF  | Negative |
| Q41015 | DVEQVLDNFNGNPIFPGVQYF  | Negative |
| Q41015 | EDVEQVLDNFNGNPIFPGVQY  | Negative |
| Q41015 | LFVFITNLSLAFSNEDVEQV   | Negative |
| Q41015 | VEQVLDNFNGNPIFPGVQYFI  | Negative |
| Q41015 | PLSPLTLSFFLFVFITNLSL   | Negative |
| Q41015 | PLTLSFFLFVFITNLSLAFS   | Negative |
| Q41015 | FFLFVFITNLSLAFSNEDVE   | Negative |
| Q41015 | NLSLAFSNEDVEQVLDNFNGN  | Negative |
| Q41015 | KPLSPLTLSFFLFVFITNLS   | Negative |
| Q41015 | ITNLSLAFSNEDVEQVLDNF   | Negative |
| Q41015 | AFSNEDVEQVLDNFNGNPIFP  | Negative |
| Q41015 | LSPLTLSFFLFVFITNLSLA   | Negative |
| Q41015 | SFFLFVFITNLSLAFSNEDV   | Negative |

|        |                      |          |
|--------|----------------------|----------|
| Q41015 | FITNLSLAFSNEDVEQVLDF | Negative |
| Q41015 | TNLSLAFSNEDVEQVLDFNG | Negative |
| Q41015 | TLSFFLFVFITNLSLAFSNE | Negative |
| Q41015 | LTLSFFLFVFITNLSLAFSN | Negative |
| Q41015 | FVFITNLSLAFSNEDVEQVL | Negative |
| Q41015 | FSNEDVEQVLDFNGNPIFPG | Negative |
| Q41162 | ISFFFLLLLNKVNSTGSLSF | Negative |
| Q41162 | FLLLLLNKVNSTGSLSFSPK | Negative |
| Q41162 | ASYKFKTQNSFPLLLSISFF | Negative |
| Q41162 | VNSTGSLSFSPKFAPNQPY  | Negative |
| Q41162 | FLLLLLNKVNSTGSLSFSPF | Negative |
| Q41162 | FPLLLSISFFLLLLLNKVNS | Negative |
| Q41162 | FFFLLLLNKVNSTGSLSF   | Negative |
| Q41162 | LSISFFFLLLLNKVNSTGSL | Negative |
| Q41162 | KTQNSFPLLLSISFFLLLL  | Negative |
| Q41162 | SFPLLLSISFFLLLLLNKVN | Negative |
| Q41162 | NSTGSLSFSPKFAPNQPYL  | Negative |
| Q41162 | FKTQNSFPLLLSISFFLLL  | Negative |
| Q41162 | LLSISFFFLLLLNKVNSTG  | Negative |
| Q41162 | KVNSTGSLSFSPKFAPNQP  | Negative |
| Q41162 | LLLLLNKVNSTGSLSFSPKF | Negative |
| Q41162 | NSFPLLLSISFFLLLLLNKV | Negative |
| Q41162 | SYKFKTQNSFPLLLSISFFF | Negative |
| Q41162 | NKVNSTGSLSFSPKFAPNQ  | Negative |
| Q41162 | TQNSFPLLLSISFFLLLLN  | Negative |
| Q41162 | LLLNKVNSTGSLSFSPKFA  | Negative |
| Q41162 | PLLSISFFFLLLLNKVNST  | Negative |
| Q41162 | LLSISFFFLLLLNKVNSTGS | Negative |
| Q41162 | YKFKTQNSFPLLLSISFFFL | Negative |
| Q41162 | LNKVNSTGSLSFSPKFAPN  | Negative |
| Q41162 | SFFFLLLLNKVNSTGSLSFS | Negative |
| Q41162 | QNSFPLLLSISFFLLLLNK  | Negative |
| Q41162 | KFKTQNSFPLLLSISFFLL  | Negative |
| Q41162 | MASYKFKTQNSFPLLLSISF | Negative |
| Q41162 | LLNKVNSTGSLSFSPKFAP  | Negative |
| Q41260 | VAALLAVFVGSAQGIKVPP  | Negative |
| Q41260 | SSSSLLVVAALLAVFVGSA  | Negative |
| Q41260 | FVGSAQGIKVPPGNITAE   | Negative |
| Q41260 | LVVAALLAVFVGSAQGIKV  | Negative |
| Q41260 | GSAQGIKVPPGNITAEYG   | Negative |
| Q41260 | GIAKVPPGNITAEYGDKWL  | Negative |
| Q41260 | SLLVVAALLAVFVGSAQGIA | Negative |
| Q41260 | AQGIKVPPGNITAEYGDK   | Negative |
| Q41260 | LLAVFVGSAQGIKVPPGN   | Negative |
| Q41260 | VFVGSAQGIKVPPGNITA   | Negative |
| Q41260 | SSSLLVVAALLAVFVGSAQG | Negative |



|        |                       |          |
|--------|-----------------------|----------|
| Q41260 | SAQGIAKVPPGPVNITAEYGD | Negative |
| Q41260 | LAVFVGSAQGIAKVPPGPNI  | Negative |
| Q41260 | LLVVAALLAVFVGSAQGIK   | Negative |
| Q41260 | MKMVCSSSSSSLLVVAALLA  | Negative |
| Q41260 | IAKVPPGPVNITAEYGDKWLD | Negative |
| Q41260 | CSSSSSSLLVVAALLAVFVG  | Negative |
| Q41260 | ALLAVFVGSAQGIKVPVGP   | Negative |
| Q41260 | VGSAQGIKVPVGPVNITAEY  | Negative |
| Q41260 | SSLLVVAALLAVFVGSAQGI  | Negative |
| Q41260 | AALLAVFVGSAQGIKVPVGP  | Negative |
| Q41260 | KMVCSSSSSSLLVVAALLAV  | Negative |
| Q41260 | SSSSSSLLVVAALLAVFVGS  | Negative |
| Q41260 | MMKMVCSSSSSSLLVVAALL  | Negative |
| Q41260 | VCSSSSSSLLVVAALLAVFV  | Negative |
| Q41260 | QGIKVPVGPVNITAEYGDKW  | Negative |
| Q41260 | AVFVGSAQGIKVPVGPVNIT  | Negative |
| Q41260 | MVCSSSSSSLLVVAALLAVF  | Negative |
| Q41260 | SSSSLLVVAALLAVFVGSAQ  | Negative |
| Q41350 | NPNFILTLVNCPYTIWPAI   | Negative |
| Q41350 | AKILLPLSLLFTLLSLSQST  | Negative |
| Q41350 | LLPLSLLFTLLSLSQSTNPN  | Negative |
| Q41350 | FILTLVNCPYTIWPAIQPN   | Negative |
| Q41350 | STNPNFILTLVNCPYTIWP   | Negative |
| Q41350 | TLLSLSQSTNPNFILTLVNN  | Negative |
| Q41350 | FTLLSLSQSTNPNFILTLVN  | Negative |
| Q41350 | QSTNPNFILTLVNCPYTIW   | Negative |
| Q41350 | ILLPLSLLFTLLSLSQSTNP  | Negative |
| Q41350 | LSLSQSTNPNFILTLVNCP   | Negative |
| Q41350 | PLSLLFTLLSLSQSTNPNFI  | Negative |
| Q41350 | NFILTLVNCPYTIWPAIQP   | Negative |
| Q41350 | LFTLLSLSQSTNPNFILTLV  | Negative |
| Q41350 | SLSQSTNPNFILTLVNCPY   | Negative |
| Q41350 | SAKILLPLSLLFTLLSLSQS  | Negative |
| Q41350 | LSQSTNPNFILTLVNCPYT   | Negative |
| Q41350 | TNPNFILTLVNCPYTIWPA   | Negative |
| Q41350 | SSSAKILLPLSLLFTLLSLS  | Negative |
| Q41350 | SSAKILLPLSLLFTLLSLSQ  | Negative |
| Q41350 | KILLPLSLLFTLLSLSQSTN  | Negative |
| Q41350 | LLFTLLSLSQSTNPNFILTL  | Negative |
| Q41350 | PNFILTLVNCPYTIWPAIQ   | Negative |
| Q41350 | LSLLFTLLSLSQSTNPNFIL  | Negative |
| Q41350 | ASSSAKILLPLSLLFTLLSL  | Negative |
| Q41350 | SLLFTLLSLSQSTNPNFILT  | Negative |
| Q41350 | SQSTNPNFILTLVNCPYTI   | Negative |
| Q41350 | MASSSAKILLPLSLLFTLLS  | Negative |
| Q41350 | ILTLVNCPYTIWPAIQPNA   | Negative |

|        |                      |          |
|--------|----------------------|----------|
| Q41350 | LLSLSQSTNPNFILTLVNNC | Negative |
| Q41638 | MGSSLWTCLILLSLASASFA | Negative |
| Q41638 | SASFAANPRTPIDVPFGRNY | Negative |
| Q41638 | TPIDVPFGRNYVPTWAFDHI | Negative |
| Q41638 | LILLSLASASFAANPRTPID | Negative |
| Q41638 | CLILLSLASASFAANPRTPI | Negative |
| Q41638 | AANPRTPIDVPFGRNYVPTW | Negative |
| Q41638 | VPFGRNYVPTWAFDHIKYL  | Negative |
| Q41638 | PRTPIDVPFGRNYVPTWAFD | Negative |
| Q41638 | GSSLWTCLILLSLASASFAA | Negative |
| Q41638 | LSLASASFAANPRTPIDVPF | Negative |
| Q41638 | ASASFAANPRTPIDVPFGRN | Negative |
| Q41638 | SLWTCLILLSLASASFAANP | Negative |
| Q41638 | SSLWTCLILLSLASASFAAN | Negative |
| Q41638 | ANPRTPIDVPFGRNYVPTWA | Negative |
| Q41638 | SFAANPRTPIDVPFGRNYVP | Negative |
| Q41638 | LLSLASASFAANPRTPIDVP | Negative |
| Q41638 | FAANPRTPIDVPFGRNYVPT | Negative |
| Q41638 | NPRTPIDVPFGRNYVPTWAF | Negative |
| Q41638 | PFGRNYVPTWAFDHIKYLNG | Negative |
| Q41638 | PIDVPFGRNYVPTWAFDHIK | Negative |
| Q41638 | IDVPFGRNYVPTWAFDHIKY | Negative |
| Q41638 | LASASFAANPRTPIDVPFGR | Negative |
| Q41638 | TCLILLSLASASFAANPRT  | Negative |
| Q41638 | ASFAANPRTPIDVPFGRNYV | Negative |
| Q41638 | SLASASFAANPRTPIDVPFG | Negative |
| Q41638 | LWTCLILLSLASASFAANPR | Negative |
| Q41638 | DVPFGRNYVPTWAFDHIKYL | Negative |
| Q41638 | ILLSLASASFAANPRTPIDV | Negative |
| Q41638 | RTPIDVPFGRNYVPTWAFDH | Negative |
| Q41649 | LFSIFLIFTIFIISALVAA  | Negative |
| Q41649 | DVTELQIGVKYKPASCEVQA | Negative |
| Q41649 | SALVAAKSAADVTELQIGVK | Negative |
| Q41649 | AKSAADVTELQIGVKYKPAS | Negative |
| Q41649 | SIFLIFTIFIISALVAAKS  | Negative |
| Q41649 | TIFIISALVAAKSAADVTE  | Negative |
| Q41649 | IASALVAAKSAADVTELQIG | Negative |
| Q41649 | VAAKSAADVTELQIGVKYKP | Negative |
| Q41649 | KSAADVTELQIGVKYKPASC | Negative |
| Q41649 | IFIISALVAAKSAADVTEL  | Negative |
| Q41649 | FTIFIISALVAAKSAADVT  | Negative |
| Q41649 | FSIFLIFTIFIISALVAAK  | Negative |
| Q41649 | LVAAKSAADVTELQIGVKYK | Negative |
| Q41649 | VTELQIGVKYKPASCEVQAH | Negative |
| Q41649 | KLFSIFLIFTIFIISALVA  | Negative |
| Q41649 | ASALVAAKSAADVTELQIGV | Negative |

|        |                      |          |
|--------|----------------------|----------|
| Q41649 | AAKSAADVTELQIGVKYKPA | Negative |
| Q41649 | MKLFSIFLIFTIFIIASALV | Negative |
| Q41649 | IFTIFIIASALVAAKSAADV | Negative |
| Q41649 | AADVTELQIGVKYKPASCEV | Negative |
| Q41649 | IIASALVAAKSAADVTELQI | Negative |
| Q41649 | FIIASALVAAKSAADVTELQ | Negative |
| Q41649 | ELQIGVKYKPASCEVQAHKG | Negative |
| Q41649 | ADVTELQIGVKYKPASCEVQ | Negative |
| Q41649 | IFLIFTIFIIASALVAAKSA | Negative |
| Q41649 | ALVAAKSAADVTELQIGVKY | Negative |
| Q41649 | TELQIGVKYKPASCEVQAHK | Negative |
| Q41649 | SAADVTELQIGVKYKPASCE | Negative |
| Q41649 | FLIFTIFIIASALVAAKSAA | Negative |
| Q42502 | ATTSSTCATLGEMVTVLSID | Negative |
| Q42502 | STCATLGEMVTVLSIDGGGI | Negative |
| Q42502 | TCATLGEMVTVLSIDGGGIK | Negative |
| Q42502 | MATTKSVLVLFFMILATTSS | Negative |
| Q42502 | TSSTCATLGEMVTVLSIDGG | Negative |
| Q42502 | KSVLVLFFMILATTSSTCAT | Negative |
| Q42502 | LGEMVTVLSIDGGGIKGIIP | Negative |
| Q42502 | CATLGEMVTVLSIDGGGIKG | Negative |
| Q42502 | LVLFFMILATTSSTCATLGE | Negative |
| Q42502 | TTSSTCATLGEMVTVLSIDG | Negative |
| Q42502 | ATLGEMVTVLSIDGGGIKGI | Negative |
| Q42502 | ATTKSVLVLFFMILATTSS  | Negative |
| Q42502 | TTKSVLVLFFMILATTSS   | Negative |
| Q42502 | TLGEMVTVLSIDGGGIKGII | Negative |
| Q42502 | MVTVLSIDGGGIKGIIPATI | Negative |
| Q42502 | LATTSSTCATLGEMVTVLSI | Negative |
| Q42502 | ILATTSSTCATLGEMVTVLS | Negative |
| Q42502 | EMVTVLSIDGGGIKGIIPAT | Negative |
| Q42502 | FFMILATTSSTCATLGEMVT | Negative |
| Q42502 | GEMVTVLSIDGGGIKGIIPA | Negative |
| Q42502 | VLVLFFMILATTSSTCATLG | Negative |
| Q42502 | SSTCATLGEMVTVLSIDGGG | Negative |
| Q42502 | TKSVLVLFFMILATTSS    | Negative |
| Q42502 | SVLVLFFMILATTSSTCATL | Negative |
| Q42502 | FMILATTSSTCATLGEMTV  | Negative |
| Q42502 | LFFMILATTSSTCATLGEMV | Negative |
| Q42502 | MILATTSSTCATLGEMTVL  | Negative |
| Q42502 | TVLSIDGGGIKGIIPATILE | Negative |
| Q42502 | VTVLSIDGGGIKGIIPATIL | Negative |
| Q43413 | LVFATDMMAEAKICEALSGN | Negative |
| Q43413 | MAGFSKVVATIFLMMLLVFA | Negative |
| Q43413 | IFLMMLLVFATDMMAEAKIC | Negative |
| Q43413 | MMAEAKICEALSGNFKGLCL | Negative |

|        |                      |          |
|--------|----------------------|----------|
| Q43413 | SKVVATIFLMMLLVFATDMM | Negative |
| Q43413 | TDMMAEAKICEALSGNFKGL | Negative |
| Q43413 | KICEALSGNFKGLCLSSRDC | Negative |
| Q43413 | ICEALSGNFKGLCLSSRDCG | Negative |
| Q43413 | VATIFLMMLLVFATDMMAEA | Negative |
| Q43413 | FSKVVATIFLMMLLVFATDM | Negative |
| Q43413 | GFSKVVATIFLMMLLVFATD | Negative |
| Q43413 | MMLLVFATDMMAEAKICEAL | Negative |
| Q43413 | CEALSGNFKGLCLSSRDCGN | Negative |
| Q43413 | ATDMMAEAKICEALSGNFKG | Negative |
| Q43413 | EAKICEALSGNFKGLCLSSR | Negative |
| Q43413 | VFATDMMAEAKICEALSGNF | Negative |
| Q43413 | FATDMMAEAKICEALSGNFK | Negative |
| Q43413 | LLVFATDMMAEAKICEALSG | Negative |
| Q43413 | DMMAEAKICEALSGNFKGLC | Negative |
| Q43413 | MLLVFATDMMAEAKICEALS | Negative |
| Q43413 | AKICEALSGNFKGLCLSSRD | Negative |
| Q43413 | KVVATIFLMMLLVFATDMMA | Negative |
| Q43413 | VVATIFLMMLLVFATDMMAE | Negative |
| Q43413 | AGFSKVVATIFLMMLLVFAT | Negative |
| Q43413 | AEAKICEALSGNFKGLCLSS | Negative |
| Q43413 | MAEAKICEALSGNFKGLCLS | Negative |
| Q43413 | ATIFLMMLLVFATDMMAEAK | Negative |
| Q43413 | TIFLMMLLVFATDMMAEAKI | Negative |
| Q43413 | FLMMLLVFATDMMAEAKICE | Negative |
| Q43767 | ADAAISCGQVSSALSPCISY | Negative |
| Q43767 | AAASQLVLVALVAAMLLVAA | Negative |
| Q43767 | VLVALVAAMLLVAADAAISC | Negative |
| Q43767 | DAAISCGQVSSALSPCISYA | Negative |
| Q43767 | LVAAMLLVAADAAISCGQVS | Negative |
| Q43767 | AMLLVAADAAISCGQVSSAL | Negative |
| Q43767 | AADAAISCGQVSSALSPCIS | Negative |
| Q43767 | RAAASQLVLVALVAAMLLVA | Negative |
| Q43767 | AAISCGQVSSALSPCISYAR | Negative |
| Q43767 | LVLVALVAAMLLVAADAAIS | Negative |
| Q43767 | QLVLVALVAAMLLVAADAAI | Negative |
| Q43767 | SCGQVSSALSPCISYARGNG | Negative |
| Q43767 | ISCGQVSSALSPCISYARGN | Negative |
| Q43767 | ALVAAMLLVAADAAISCGQV | Negative |
| Q43767 | ASQLVLVALVAAMLLVAADA | Negative |
| Q43767 | SQLVLVALVAAMLLVAADAA | Negative |
| Q43767 | VAADAAISCGQVSSALSPCI | Negative |
| Q43767 | GQVSSALSPCISYARGNGAK | Negative |
| Q43767 | ARAAASQLVLVALVAAMLLV | Negative |
| Q43767 | VAAMLLVAADAAISCGQVSS | Negative |
| Q43767 | MLLVAADAAISCGQVSSALS | Negative |

|        |                      |          |
|--------|----------------------|----------|
| Q43767 | MARAAASQLVLVALVAAMLL | Negative |
| Q43767 | CGQVSSALSPCISYARGNGA | Negative |
| Q43767 | LLVAADAAISCGQVSSALSP | Negative |
| Q43767 | AAMLLVAADAAISCGQVSSA | Negative |
| Q43767 | VALVAAMLLVAADAAISCGQ | Negative |
| Q43767 | AISCGQVSSALSPCISYARG | Negative |
| Q43767 | LVAADAAISCGQVSSALSPC | Negative |
| Q43767 | AASQLVLVALVAAMLLVAAD | Negative |
| Q43871 | ALVALVAAMLLVAADAAITC | Negative |
| Q43871 | ADAAITCGQVSSALGPCAAY | Negative |
| Q43871 | GQVSSALGPCAAYAKGSGTS | Negative |
| Q43871 | AAITCGQVSSALGPCAAYAK | Negative |
| Q43871 | LVAADAAITCGQVSSALGPC | Negative |
| Q43871 | VALVAAMLLVAADAAITCGQ | Negative |
| Q43871 | AMLLVAADAAITCGQVSSAL | Negative |
| Q43871 | LLVAADAAITCGQVSSALGP | Negative |
| Q43871 | DAAITCGQVSSALGPCAAYA | Negative |
| Q43871 | MLLVAADAAITCGQVSSALG | Negative |
| Q43871 | TAATKLALVALVAAMLLVAA | Negative |
| Q43871 | LVAAMLLVAADAAITCGQVS | Negative |
| Q43871 | ATKLALVALVAAMLLVAADA | Negative |
| Q43871 | ALVAAMLLVAADAAITCGQV | Negative |
| Q43871 | TCGQVSSALGPCAAYAKGSG | Negative |
| Q43871 | TKLALVALVAAMLLVAADAA | Negative |
| Q43871 | AAMLLVAADAAITCGQVSSA | Negative |
| Q43871 | KLALVALVAAMLLVAADAAI | Negative |
| Q43871 | RTAATKLALVALVAAMLLVA | Negative |
| Q43871 | VAAMLLVAADAAITCGQVSS | Negative |
| Q43871 | AADAAITCGQVSSALGPCAA | Negative |
| Q43871 | ARTAATKLALVALVAAMLLV | Negative |
| Q43871 | AATKLALVALVAAMLLVAAD | Negative |
| Q43871 | CGQVSSALGPCAAYAKGSGT | Negative |
| Q43871 | VAADAAITCGQVSSALGPCA | Negative |
| Q43871 | ITCGQVSSALGPCAAYAKGS | Negative |
| Q43871 | LALVALVAAMLLVAADAAIT | Negative |
| Q43871 | MARTAATKLALVALVAAMLL | Negative |
| Q43871 | AITCGQVSSALGPCAAYAKG | Negative |
| Q44642 | FSLPAFAQENQMTTQPARIA | Negative |
| Q44642 | SLPAFAQENQMTTQPARIAV | Negative |
| Q44642 | NFLAASFSTIMLVGAFLPA  | Negative |
| Q44642 | LAASFSTIMLVGAFLPAFA  | Negative |
| Q44642 | AASFSTIMLVGAFLPAFAQ  | Negative |
| Q44642 | MLVGAFSLPAFAQENQMTTQ | Negative |
| Q44642 | ENQMTTQPARIAVTGEGMMT | Negative |
| Q44642 | GAFSLPAFAQENQMTTQPAR | Negative |
| Q44642 | VGAFSLPAFAQENQMTTQPA | Negative |

|        |                      |          |
|--------|----------------------|----------|
| Q44642 | PAFAQENQMTTQPARIAVTG | Negative |
| Q44642 | MNTRASNFLAASFSTIMLVG | Negative |
| Q44642 | AFAQENQMTTQPARIAVTGE | Negative |
| Q44642 | ASFSTIMLVGAFSLPAFAQE | Negative |
| Q44642 | NTRASNFLAASFSTIMLVGA | Negative |
| Q44642 | SFSTIMLVGAFSLPAFAQEN | Negative |
| Q44642 | FLAASFSTIMLVGAFSLPAF | Negative |
| Q44642 | FAQENQMTTQPARIAVTGEG | Negative |
| Q44642 | LPAFAQENQMTTQPARIAVT | Negative |
| Q44642 | AFSLPAFAQENQMTTQPARI | Negative |
| Q44642 | FSTIMLVGAFSLPAFAQENQ | Negative |
| Q44642 | ASNFLAASFSTIMLVGAFSL | Negative |
| Q44642 | QENQMTTQPARIAVTGEGMM | Negative |
| Q44642 | RASNFLAASFSTIMLVGAFS | Negative |
| Q44642 | IMLVGAFSLPAFAQENQMTT | Negative |
| Q44642 | TRASNFLAASFSTIMLVGAF | Negative |
| Q44642 | TIMLVGAFSLPAFAQENQMT | Negative |
| Q44642 | AQENQMTTQPARIAVTGEGM | Negative |
| Q44642 | SNFLAASFSTIMLVGAFSLP | Negative |
| Q44642 | LVGAFSLPAFAQENQMTTQP | Negative |
| Q44856 | WGWAASSQDSKIVYVFSDS  | Negative |
| Q44856 | RAKWLWMTAVGSLITVLT   | Negative |
| Q44856 | AAASSQDSKIVYVFSDSCGY | Negative |
| Q44856 | AASSQDSKIVYVFSDSCGYC | Negative |
| Q44856 | WAAASSQDSKIVYVFSDSCG | Negative |
| Q44856 | WMTAVGSLITVLTAWGWAA  | Negative |
| Q44856 | WLWMTAVGSLITVLTAWGW  | Negative |
| Q44856 | VGSLITVLTAWGWAAASSQ  | Negative |
| Q44856 | ASSQDSKIVYVFSDSCGYCQ | Negative |
| Q44856 | SQDSKIVYVFSDSCGYCQTF | Negative |
| Q44856 | LTAWGWAAASSQDSKIVYVF | Negative |
| Q44856 | ITVLTAWGWAAASSQDSKIV | Negative |
| Q44856 | TVLTAWGWAAASSQDSKIVY | Negative |
| Q44856 | TAVGSLITVLTAWGWAAAS  | Negative |
| Q44856 | QDSKIVYVFSDSCGYCQTFR | Negative |
| Q44856 | AKWLWMTAVGSLITVLTAW  | Negative |
| Q44856 | MTAVGSLITVLTAWGWAAA  | Negative |
| Q44856 | LWMTAVGSLITVLTAWGWA  | Negative |
| Q44856 | GWAAASSQDSKIVYVFSDSC | Negative |
| Q44856 | TAWGWAAASSQDSKIVYVFS | Negative |
| Q44856 | AWGWAAASSQDSKIVYVFSD | Negative |
| Q44856 | LLITVLTAWGWAAASSQDSK | Negative |
| Q44856 | VLTAWSWAAASSQDSKIVYV | Negative |
| Q44856 | SSQDSKIVYVFSDSCGYCQT | Negative |
| Q44856 | LITVLTAWGWAAASSQDSKI | Negative |
| Q44856 | KWLWMTAVGSLITVLTAWG  | Negative |

|        |                      |          |
|--------|----------------------|----------|
| Q44856 | GSLITVLTAWGWAAASSQD  | Negative |
| Q44856 | MRAKWLWMTAVGSLITVLT  | Negative |
| Q44856 | AVGSLITVLTAWGWAAASS  | Negative |
| Q45071 | SCLSGKSAYAATSTTIAKHI | Negative |
| Q45071 | CLWILVLLLSCLSGKSAYAA | Negative |
| Q45071 | CLSGKSAYAATSTTIAKHIG | Negative |
| Q45071 | TSTTIAKHIGNSNPLIDHHL | Negative |
| Q45071 | LLSCLSGKSAYAATSTTIAK | Negative |
| Q45071 | RKKCSVCLWILVLLLSCLSG | Negative |
| Q45071 | KKCSVCLWILVLLLSCLSGK | Negative |
| Q45071 | ATSTTIAKHIGNSNPLIDHH | Negative |
| Q45071 | LSCLSGKSAYAATSTTIAKH | Negative |
| Q45071 | LLSCLSGKSAYAATSTTIA  | Negative |
| Q45071 | VLLLSCLSGKSAYAATSTTI | Negative |
| Q45071 | MRKKCSVCLWILVLLLSCLS | Negative |
| Q45071 | TTIAKHIGNSNPLIDHHLGA | Negative |
| Q45071 | ILVLLLSCLSGKSAYAATST | Negative |
| Q45071 | LSGKSAYAATSTTIAKHIGN | Negative |
| Q45071 | LWILVLLLSCLSGKSAYAAT | Negative |
| Q45071 | GKSAYAATSTTIAKHIGNSN | Negative |
| Q45071 | VCLWILVLLLSCLSGKSAYA | Negative |
| Q45071 | AYAATSTTIAKHIGNSNPLI | Negative |
| Q45071 | SVCLWILVLLLSCLSGKSAY | Negative |
| Q45071 | KCSVCLWILVLLLSCLSGKS | Negative |
| Q45071 | AATSTTIAKHIGNSNPLIDH | Negative |
| Q45071 | YAATSTTIAKHIGNSNPLID | Negative |
| Q45071 | STTIAKHIGNSNPLIDHHLG | Negative |
| Q45071 | SAYAATSTTIAKHIGNSNPL | Negative |
| Q45071 | SGKSAYAATSTTIAKHIGNS | Negative |
| Q45071 | KSAYAATSTTIAKHIGNSNP | Negative |
| Q45071 | CSVCLWILVLLLSCLSGKSA | Negative |
| Q45071 | WILVLLLSCLSGKSAYAATS | Negative |
| Q45340 | AALALAGMARLAPAAAQAPQ | Negative |
| Q45340 | SSLQIPRSAWRLHALAAALA | Negative |
| Q45340 | HALAAALALAGMARLAPAAA | Negative |
| Q45340 | LHALAAALALAGMARLAPAA | Negative |
| Q45340 | DRFRQCPSSLQIPRSAWRLH | Negative |
| Q45340 | SLQIPRSAWRLHALAAALAL | Negative |
| Q45340 | MYLDRFRQCPSSLQIPRSAW | Negative |
| Q45340 | ALAAALALAGMARLAPAAAQ | Negative |
| Q45340 | PSSLQIPRSAWRLHALAAAL | Negative |
| Q45340 | IPRSAWRLHALAAALALAGM | Negative |
| Q45340 | RSAWRLHALAAALALAGMAR | Negative |
| Q45340 | LALAGMARLAPAAAQAPQPP | Negative |
| Q45340 | SAWRLHALAAALALAGMARL | Negative |
| Q45340 | RQCPSSLQIPRSAWRLHALA | Negative |

|        |                       |          |
|--------|-----------------------|----------|
| Q45340 | YLDRFRQCPSSLQIPRSAWR  | Negative |
| Q45340 | QCPSSLQIPSAWRLHALAA   | Negative |
| Q45340 | LDRFRQCPSSLQIPSAWRL   | Negative |
| Q45340 | ALAGMARLAPAAAQAPQPPV  | Negative |
| Q45340 | LQIPSAWRLHALAAALALA   | Negative |
| Q45340 | LAAALALAGMARLAPAAAQA  | Negative |
| Q45340 | QIPSAWRLHALAAALALAG   | Negative |
| Q45340 | FRQCPSSLQIPSAWRLHAL   | Negative |
| Q45340 | RLHALAAALALAGMARLAPA  | Negative |
| Q45340 | CPSSLQIPSAWRLHALAAA   | Negative |
| Q45340 | RFRQCPSSLQIPSAWRLHA   | Negative |
| Q45340 | AAALALAGMARLAPAAAQAP  | Negative |
| Q45340 | PRSAWRLHALAAALALAGMA  | Negative |
| Q45340 | WRLHALAAALALAGMARLAP  | Negative |
| Q45340 | AWRLHALAAALALAGMARLA  | Negative |
| Q45Z11 | MKTLLTLVVVTIVCLDLGY   | Negative |
| Q45Z11 | VVVTIVCLDLGYTMTTCYNQQ | Negative |
| Q45Z11 | QQSSEAKTTTTCSGGVSSCY  | Negative |
| Q45Z11 | DLGYTMTTCYNQQSSEAKTTT | Negative |
| Q45Z11 | YNQQSSEAKTTTTCSGGVSS  | Negative |
| Q45Z11 | GYTMTTCYNQQSSEAKTTTTC | Negative |
| Q45Z11 | IVCLDLGYTMTTCYNQQSSEA | Negative |
| Q45Z11 | LGYTMTTCYNQQSSEAKTTTT | Negative |
| Q45Z11 | SEAKTTTTCSGGVSSCYKKT  | Negative |
| Q45Z11 | LVVVTIVCLDLGYTMTTCYNQ | Negative |
| Q45Z11 | VTIVCLDLGYTMTTCYNQQSS | Negative |
| Q45Z11 | LTLVVVTIVCLDLGYTMTCY  | Negative |
| Q45Z11 | TIVCLDLGYTMTTCYNQQSSE | Negative |
| Q45Z11 | KTLLTLVVVTIVCLDLGYT   | Negative |
| Q45Z11 | TLLTLVVVTIVCLDLGYTM   | Negative |
| Q45Z11 | LLTLVVVTIVCLDLGYTMT   | Negative |
| Q45Z11 | LDLGYTMTTCYNQQSSEAKTT | Negative |
| Q45Z11 | QSSEAKTTTTCSGGVSSCYK  | Negative |
| Q45Z11 | YTMTTCYNQQSSEAKTTTTCS | Negative |
| Q45Z11 | TMTTCYNQQSSEAKTTTTCSG | Negative |
| Q45Z11 | LLTLVVVTIVCLDLGYTMT   | Negative |
| Q45Z11 | VVTIVCLDLGYTMTTCYNQQS | Negative |
| Q45Z11 | MTCYNQQSSEAKTTTTCSGG  | Negative |
| Q45Z11 | VCLDLGYTMTTCYNQQSSEAK | Negative |
| Q45Z11 | NQQSSEAKTTTTCSGGVSSC  | Negative |
| Q45Z11 | SSEAKTTTTCSGGVSSCYKK  | Negative |
| Q45Z11 | TCYNQQSSEAKTTTTCSGGV  | Negative |
| Q45Z11 | CLDLGYTMTTCYNQQSSEAKT | Negative |
| Q45Z11 | CYNQQSSEAKTTTTCSGGVS  | Negative |
| Q46203 | ALPVGNPAPESLLIDGTMWE  | Negative |
| Q46203 | ATGSALSQALPVGNPAPES   | Negative |



|        |                       |          |
|--------|-----------------------|----------|
| Q46203 | GNPAEPSLLIDGTMWEGASG  | Negative |
| Q46203 | EPSLLIDGTMWEGASGDPCD  | Negative |
| Q46203 | ALSLQALPVGNPAPESLLID  | Negative |
| Q46203 | MKKLLKSALLFAATGSALS   | Negative |
| Q46203 | KLLKSALLFAATGSALSQA   | Negative |
| Q46203 | QALPVGNPAPESLLIDGTMW  | Negative |
| Q46203 | NPAEPSLLIDGTMWEGASGD  | Negative |
| Q46203 | KKLLKSALLFAATGSALSQ   | Negative |
| Q46203 | SALSQALPVGNPAPESLLI   | Negative |
| Q46203 | LQALPVGNPAPESLLIDGTM  | Negative |
| Q46203 | KSALLFAATGSALSQALPV   | Negative |
| Q46203 | LLKSALLFAATGSALSQAL   | Negative |
| Q46203 | TGSALSQALPVGNPAPESL   | Negative |
| Q46203 | FAATGSALSQALPVGNPAP   | Negative |
| Q46203 | VGNPAEPSLLIDGTMWEGAS  | Negative |
| Q46203 | SLQALPVGNPAPESLLIDGT  | Negative |
| Q46203 | LPVGNPAPESLLIDGTMWEG  | Negative |
| Q46203 | PVGNPAPESLLIDGTMWEGA  | Negative |
| Q46203 | LFAATGSALSQALPVGNPAP  | Negative |
| Q46203 | LLFAATGSALSQALPVGNP   | Negative |
| Q46203 | LSLQALPVGNPAPESLLIDG  | Negative |
| Q46203 | PAEPSLLIDGTMWEGASGDP  | Negative |
| Q46203 | APESLLIDGTMWEGASGDPC  | Negative |
| Q46203 | AATGSALSQALPVGNPAP    | Negative |
| Q46203 | LKSALLFAATGSALSQALP   | Negative |
| Q46203 | GSALSQALPVGNPAPESLL   | Negative |
| Q46203 | SALLFAATGSALSQALPVG   | Negative |
| Q46444 | AQTGPAAQAAAQVQRVDGDF  | Negative |
| Q46444 | WPGRMVWLLAACLGSAFAA   | Negative |
| Q46444 | RMVWLLAACLGSAFAAQTG   | Negative |
| Q46444 | NSHGWPGRMVWLLAACLGSA  | Negative |
| Q46444 | PGRMVWLLAACLGSAFAAQ   | Negative |
| Q46444 | DNSHGWPGRMVWLLAACLG   | Negative |
| Q46444 | GWPGRMVWLLAACLGSAFA   | Negative |
| Q46444 | LIDNSHGWPGRMVWLLACL   | Negative |
| Q46444 | LLAACLGSAFAAQTGPAQA   | Negative |
| Q46444 | MERLIDNSHGWPGRMVWLLA  | Negative |
| Q46444 | AACLGSAFAAQTGPAQAQA   | Negative |
| Q46444 | MVWLLAACLGSAFAAQTGP   | Negative |
| Q46444 | LGSAFAAQTGPAQAQAQA    | Negative |
| Q46444 | LAACLGSAFAAQTGPAQAQA  | Negative |
| Q46444 | AAFAAQTGPAQAQAQAQVQRV | Negative |
| Q46444 | CLGSAFAAQTGPAQAQAQA   | Negative |
| Q46444 | AFAAQTGPAQAQAQAQVQRV  | Negative |
| Q46444 | IDNSHGWPGRMVWLLACL    | Negative |
| Q46444 | SAAFAAQTGPAQAQAQAQVQR | Negative |

|        |                      |          |
|--------|----------------------|----------|
| Q46444 | ERLIDNSHGWPGRMVWLLAA | Negative |
| Q46444 | RLIDNSHGWPGRMVWLLAAC | Negative |
| Q46444 | AAFAQTGPAAQAAAAVQRVD | Negative |
| Q46444 | ACLSAAAFAQTGPAAQAAA  | Negative |
| Q46444 | HGWPGRMVWLLAACLSAAA  | Negative |
| Q46444 | GRMVWLLAACLSAAAFAQT  | Negative |
| Q46444 | FAQTGPAAQAAAAVQRVDGD | Negative |
| Q46444 | VWLLAACLSAAAFAQTGPA  | Negative |
| Q46444 | SHGWPGRMVWLLAACLSAA  | Negative |
| Q46444 | GSAAAFAQTGPAAQAAAAVQ | Negative |
| Q47223 | PTTVNGGTVHFKGEVVNAAC | Negative |
| Q47223 | LSLSSTAALADTTPTTVNGG | Negative |
| Q47223 | VLSALSLSSTAALADTTPTT | Negative |
| Q47223 | LAIVVLSALSLSSTAALADT | Negative |
| Q47223 | LSSTAALADTTPTTVNGGTV | Negative |
| Q47223 | LSALSLSSTAALADTTPTTV | Negative |
| Q47223 | TTVNGGTVHFKGEVVNAACA | Negative |
| Q47223 | SSTAALADTTPTTVNGGTVH | Negative |
| Q47223 | TVNGGTVHFKGEVVNAACAV | Negative |
| Q47223 | IKTLAIVVLSALSLSSTAAL | Negative |
| Q47223 | KTLAIVVLSALSLSSTAALA | Negative |
| Q47223 | AALADTTPTTVNGGTVHFKG | Negative |
| Q47223 | TLAIVVLSALSLSSTAALAD | Negative |
| Q47223 | AIVVLSALSLSSTAALADTT | Negative |
| Q47223 | DTTPTTVNGGTVHFKGEVVN | Negative |
| Q47223 | SLSSTAALADTTPTTVNGGT | Negative |
| Q47223 | IVVLSALSLSSTAALADTTP | Negative |
| Q47223 | ALADTTPTTVNGGTVHFKGE | Negative |
| Q47223 | STAALADTTPTTVNGGTVHF | Negative |
| Q47223 | SALSLSSTAALADTTPTTVN | Negative |
| Q47223 | TPTTVNGGTVHFKGEVVNAA | Negative |
| Q47223 | LADTTPTTVNGGTVHFKGEV | Negative |
| Q47223 | TTPTTVNGGTVHFKGEVVNA | Negative |
| Q47223 | KIKTLAIVVLSALSLSSTA  | Negative |
| Q47223 | MKIKTLAIVVLSALSLSSTA | Negative |
| Q47223 | TAALADTTPTTVNGGTVHFK | Negative |
| Q47223 | VNGGTVHFKGEVVNAACAVD | Negative |
| Q47223 | ADTTPTTVNGGTVHFKGEVV | Negative |
| Q47223 | ALSLSSTAALADTTPTTVNG | Negative |
| Q47459 | NMHDQVNNAQAPAHQMSSA  | Negative |
| Q47459 | MNMHDQVNNAQAPAHQMSS  | Negative |
| Q47459 | AIMAVASSAMAAETMNMHDQ | Negative |
| Q47459 | AMAAETMNMHDQVNNAQAPA | Negative |
| Q47459 | MAAETMNMHDQVNNAQAPAH | Negative |
| Q47459 | MAVASSAMAAETMNMHDQVN | Negative |
| Q47459 | IMAVASSAMAAETMNMHDQV | Negative |

|        |                      |          |
|--------|----------------------|----------|
| Q47459 | VAIMAVASSAMAAETMNMHD | Negative |
| Q47459 | VASSAMAAETMNMHDQVNNA | Negative |
| Q47459 | HDQVNNAQAPAHQMSSAEK  | Negative |
| Q47459 | AAETMNMHDQVNNAQAPAHQ | Negative |
| Q47459 | TMNMHDQVNNAQAPAHQMQS | Negative |
| Q47459 | VNNAQAPAHQMSSAEKSAV  | Negative |
| Q47459 | MKKILVSFVAIMAVASSAMA | Negative |
| Q47459 | DQVNNAQAPAHQMSSAEKS  | Negative |
| Q47459 | SAMAAETMNMHDQVNNAQAP | Negative |
| Q47459 | KKILVSFVAIMAVASSAMAA | Negative |
| Q47459 | KILVSFVAIMAVASSAMAAE | Negative |
| Q47459 | FVAIMAVASSAMAAETMNMH | Negative |
| Q47459 | AVASSAMAAETMNMHDQVNN | Negative |
| Q47459 | QVNNAQAPAHQMSSAEKSA  | Negative |
| Q47459 | ASSAMAAETMNMHDQVNNAQ | Negative |
| Q47459 | MHDQVNNAQAPAHQMSSAE  | Negative |
| Q47459 | SSAMAAETMNMHDQVNNAQA | Negative |
| Q47459 | SFVAIMAVASSAMAAETMNM | Negative |
| Q47459 | LVSFVAIMAVASSAMAAETM | Negative |
| Q47459 | AETMNMHDQVNNAQAPAHQM | Negative |
| Q47459 | ILVSFVAIMAVASSAMAAET | Negative |
| Q47459 | ETMNMHDQVNNAQAPAHQMQ | Negative |
| Q47706 | AVICLTAASGLTSAYAAQLA | Negative |
| Q47706 | TSAYAAQLADDEAGLRIRLK | Negative |
| Q47706 | ICLTAASGLTSAYAAQLADD | Negative |
| Q47706 | RKIVAMAVICLTAASGLTSA | Negative |
| Q47706 | LADDEAGLRIRLKNELRRAD | Negative |
| Q47706 | VAMAVICLTAASGLTSAYAA | Negative |
| Q47706 | AYAAQLADDEAGLRIRLKNE | Negative |
| Q47706 | DEAGLRIRLKNELRRADKPS | Negative |
| Q47706 | IVAMAVICLTAASGLTSAYA | Negative |
| Q47706 | MRKIVAMAVICLTAASGLTS | Negative |
| Q47706 | AMAVICLTAASGLTSAYAAQ | Negative |
| Q47706 | GLTSAYAAQLADDEAGLRIR | Negative |
| Q47706 | AQLADDEAGLRIRLKNELRR | Negative |
| Q47706 | SAYAAQLADDEAGLRIRLKN | Negative |
| Q47706 | LTAASGLTSAYAAQLADDEA | Negative |
| Q47706 | YAAQLADDEAGLRIRLKNEL | Negative |
| Q47706 | MAVICLTAASGLTSAYAAQL | Negative |
| Q47706 | KIVAMAVICLTAASGLTSAY | Negative |
| Q47706 | SGLTSAYAAQLADDEAGLRI | Negative |
| Q47706 | QLADDEAGLRIRLKNELRRA | Negative |
| Q47706 | DDEAGLRIRLKNELRRADKP | Negative |
| Q47706 | AAQLADDEAGLRIRLKNELR | Negative |
| Q47706 | EAGLRIRLKNELRRADKPSA | Negative |
| Q47706 | AASGLTSAYAAQLADDEAGL | Negative |

|        |                       |          |
|--------|-----------------------|----------|
| Q47706 | CLTAASGLTSAYAAQLADDE  | Negative |
| Q47706 | ADDEAGLRIRLKNELRRADK  | Negative |
| Q47706 | LTSAYAAQLADDEAGLRIRL  | Negative |
| Q47706 | ASGLTSAYAAQLADDEAGLR  | Negative |
| Q47706 | TAASGLTSAYAAQLADDEAG  | Negative |
| Q47898 | FIKKLGIATAAIAINPLEAK  | Negative |
| Q47898 | NNRRDFIKKLGIAATAIAIN  | Negative |
| Q47898 | QTMNNRRDFIKKLGIAATAA  | Negative |
| Q47898 | IYKQQTMMNNRRDFIKKLG   | Negative |
| Q47898 | RDFIKKLGIAATAIAINPLE  | Negative |
| Q47898 | DFIKKLGIAATAIAINPLEA  | Negative |
| Q47898 | IAINPLEAKNLLDTSEPKTT  | Negative |
| Q47898 | ATAAIAINPLEAKNLLDTSE  | Negative |
| Q47898 | NNRRDFIKKLGIAATAIAI   | Negative |
| Q47898 | TAAIAINPLEAKNLLDTSEP  | Negative |
| Q47898 | IYKQQTMMNNRRDFIKKLG   | Negative |
| Q47898 | GIATAAIAINPLEAKNLLDT  | Negative |
| Q47898 | IATAAIAINPLEAKNLLDTS  | Negative |
| Q47898 | MNNRRDFIKKLGIAATAIA   | Negative |
| Q47898 | AAIAINPLEAKNLLDTSEPK  | Negative |
| Q47898 | KQQTMMNNRRDFIKKLGIA   | Negative |
| Q47898 | RRDFIKKLGIAATAIAINPL  | Negative |
| Q47898 | AINPLEAKNLLDTSEPKTTN  | Negative |
| Q47898 | NRRDFIKKLGIAATAIAINP  | Negative |
| Q47898 | KLGIATAAIAINPLEAKNLL  | Negative |
| Q47898 | RIYKQQTMMNNRRDFIKKL   | Negative |
| Q47898 | LGIATAAIAINPLEAKNLLD  | Negative |
| Q47898 | TMNNRRDFIKKLGIAATAI   | Negative |
| Q47898 | MR IYKQQTMMNNRRDFIKK  | Negative |
| Q47898 | KKLGIATAAIAINPLEAKNL  | Negative |
| Q47898 | IKKLGIAATAAIAINPLEAKN | Negative |
| Q47898 | YKQQTMMNNRRDFIKKLGIA  | Negative |
| Q47898 | AIAINPLEAKNLLDTSEPKT  | Negative |
| Q47898 | QQTMMNNRRDFIKKLGIA    | Negative |
| Q47898 | INPLEAKNLLDTSEPKTTNK  | Negative |
| Q47910 | MNFKSTVITAMCCFFSFAVL  | Negative |
| Q47910 | FKSTVITAMCCFFSFAVLAS  | Negative |
| Q47910 | LEKPKLVVGLVVDQMRWDYL  | Negative |
| Q47910 | LASEKLEKPKLVVGLVVDQM  | Negative |
| Q47910 | MCCFFSFAVLASEKLEKPKL  | Negative |
| Q47910 | SEKLEKPKLVVGLVVDQMRW  | Negative |
| Q47910 | CFFSFAVLASEKLEKPKLVV  | Negative |
| Q47910 | TVITAMCCFFSFAVLASEKL  | Negative |
| Q47910 | FFSFAVLASEKLEKPKLVVG  | Negative |
| Q47910 | ASEKLEKPKLVVGLVVDQMR  | Negative |
| Q47910 | FSFAVLASEKLEKPKLVVGL  | Negative |

|        |                      |          |
|--------|----------------------|----------|
| Q47910 | NFKSTVITAMCCFFSFAVLA | Negative |
| Q47910 | STVITAMCCFFSFAVLASEK | Negative |
| Q47910 | ITAMCCFFSFAVLASEKLEK | Negative |
| Q47910 | EKLEKPKLVVGLVVDQMRWD | Negative |
| Q47910 | AVLASEKLEKPKLVVGLVVD | Negative |
| Q47910 | AMCCFFSFAVLASEKLEKPK | Negative |
| Q47910 | KPKLVVGLVVDQMRWDYLYR | Negative |
| Q47910 | SFAVLASEKLEKPKLVVGLV | Negative |
| Q47910 | CCFFSFAVLASEKLEKPKLV | Negative |
| Q47910 | TAMCCFFSFAVLASEKLEKP | Negative |
| Q47910 | EKPKLVVGLVVDQMRWDYLY | Negative |
| Q47910 | KLEKPKLVVGLVVDQMRWDY | Negative |
| Q47910 | KSTVITAMCCFFSFAVLASE | Negative |
| Q47910 | FAVLASEKLEKPKLVVGLVV | Negative |
| Q47910 | LVVGLVVDQMRWDYLYRYD  | Negative |
| Q47910 | VLASEKLEKPKLVVGLVVDQ | Negative |
| Q47910 | PKLVVGLVVDQMRWDYLYRY | Negative |
| Q47910 | KLVVGLVVDQMRWDYLYRYY | Negative |
| Q47952 | KLETIVVSSEDDSVHNKNVG | Negative |
| Q47952 | NMQTEKLETIVVSSEDDSVH | Negative |
| Q47952 | EKLETIVVSSEDDSVHNKNV | Negative |
| Q47952 | AESNMQTEKLETIVVSSEDD | Negative |
| Q47952 | ESNMQTEKLETIVVSSEDDS | Negative |
| Q47952 | GYAHTVYAESNMQTEKLETI | Negative |
| Q47952 | TLCILGYAHTVYAESNMQTE | Negative |
| Q47952 | TVYAESNMQTEKLETIVVSS | Negative |
| Q47952 | NKLSAITLCILGYAHTVYAE | Negative |
| Q47952 | MQTEKLETIVVSSEDDSVHN | Negative |
| Q47952 | KANKLSAITLCILGYAHTVY | Negative |
| Q47952 | LSAITLCILGYAHTVYAESN | Negative |
| Q47952 | SNMQTEKLETIVVSSEDDSV | Negative |
| Q47952 | YAESNMQTEKLETIVVSSED | Negative |
| Q47952 | KLSAITLCILGYAHTVYAES | Negative |
| Q47952 | AHTVYAESNMQTEKLETIVV | Negative |
| Q47952 | ANKLSAITLCILGYAHTVYA | Negative |
| Q47952 | CILGYAHTVYAESNMQTEKL | Negative |
| Q47952 | SAITLCILGYAHTVYAESNM | Negative |
| Q47952 | HTVYAESNMQTEKLETIVVS | Negative |
| Q47952 | LCILGYAHTVYAESNMQTEK | Negative |
| Q47952 | TEKLETIVVSSEDDSVHNKN | Negative |
| Q47952 | VYAESNMQTEKLETIVVSSE | Negative |
| Q47952 | QTEKLETIVVSSEDDSVHNK | Negative |
| Q47952 | LGYAHTVYAESNMQTEKLET | Negative |
| Q47952 | MKANKLSAITLCILGYAHTV | Negative |
| Q47952 | YAHTVYAESNMQTEKLETIV | Negative |
| Q47952 | ILGYAHTVYAESNMQTEKLE | Negative |

|        |                      |          |
|--------|----------------------|----------|
| Q47952 | ITLCILGYAHTVYAESNMQT | Negative |
| Q48245 | NRPLVSLALVGALVSITPQQ | Negative |
| Q48245 | QSHAAFFTTVIIPAIVGGIA | Negative |
| Q48245 | ITPQQSHAAFFTTVIIPAIV | Negative |
| Q48245 | TPQQSHAAFFTTVIIPAIVG | Negative |
| Q48245 | VSLALVGALVSITPQQSHAA | Negative |
| Q48245 | EIQQTHRKINRPLVSLALVG | Negative |
| Q48245 | LVSITPQQSHAAFFTTVIIP | Negative |
| Q48245 | IQQTHRKINRPLVSLALVGA | Negative |
| Q48245 | PQQSHAAFFTTVIIPAIVGG | Negative |
| Q48245 | GALVSITPQQSHAAFFTTVI | Negative |
| Q48245 | ALVGALVSITPQQSHAAFFT | Negative |
| Q48245 | KINRPLVSLALVGALVSITP | Negative |
| Q48245 | PLVSLALVGALVSITPQQSH | Negative |
| Q48245 | HRKINRPLVSLALVGALVSI | Negative |
| Q48245 | VSITPQQSHAAFFTTVIIPA | Negative |
| Q48245 | THRKINRPLVSLALVGALVS | Negative |
| Q48245 | ALVSITPQQSHAAFFTTVII | Negative |
| Q48245 | SLALVGALVSITPQQSHAAF | Negative |
| Q48245 | MEIQQTHRKINRPLVSLALV | Negative |
| Q48245 | INRPLVSLALVGALVSITPQ | Negative |
| Q48245 | VGALVSITPQQSHAAFFTTV | Negative |
| Q48245 | LVSLALVGALVSITPQQSHA | Negative |
| Q48245 | QQSHAAFFTTVIIPAIVGGI | Negative |
| Q48245 | RKINRPLVSLALVGALVSIT | Negative |
| Q48245 | SITPQQSHAAFFTTVIIPAI | Negative |
| Q48245 | QTHRKINRPLVSLALVGALV | Negative |
| Q48245 | RPLVSLALVGALVSITPQQS | Negative |
| Q48245 | QQTHRKINRPLVSLALVGAL | Negative |
| Q48245 | LALVGALVSITPQQSHAAFF | Negative |
| Q4LCS8 | PGNYPLDRSGKKYPCTITWK | Negative |
| Q4LCS8 | SIHGADVPGNYPLDRSGKKY | Negative |
| Q4LCS8 | LVLFSVIVILFSLIGSIHGA | Negative |
| Q4LCS8 | VPGNYPLDRSGKKYPCTITW | Negative |
| Q4LCS8 | GSIHGADVPGNYPLDRSGKK | Negative |
| Q4LCS8 | GADVPGNYPLDRSGKKYPCT | Negative |
| Q4LCS8 | SLIGSIHGADVPGNYPLDRS | Negative |
| Q4LCS8 | IHGADVPGNYPLDRSGKKYP | Negative |
| Q4LCS8 | ILFSLIGSIHGADVPGNYPL | Negative |
| Q4LCS8 | NYPLDRSGKKYPCTITWKKN | Negative |
| Q4LCS8 | VIVILFSLIGSIHGADVPGN | Negative |
| Q4LCS8 | IGSIHGADVPGNYPLDRSGK | Negative |
| Q4LCS8 | FSLIGSIHGADVPGNYPLDR | Negative |
| Q4LCS8 | VILFSLIGSIHGADVPGNYP | Negative |
| Q4LCS8 | DVPGNYPLDRSGKKYPCTIT | Negative |
| Q4LCS8 | HGADVPGNYPLDRSGKKYPC | Negative |

|        |                        |          |
|--------|------------------------|----------|
| Q4LCS8 | MKLVLF SVIVILFSLIGSIH  | Negative |
| Q4LCS8 | LIGSIHGADVPGNYPLDRSG   | Negative |
| Q4LCS8 | MMKLVLF SVIVILFSLIGSI  | Negative |
| Q4LCS8 | LFSLIGSIHGADVPGNYPLD   | Negative |
| Q4LCS8 | ADVPGNYPLDRSGKKYPCTI   | Negative |
| Q4LCS8 | KLVLFSVIVILFSLIGSIHG   | Negative |
| Q4LCS8 | PLDRSGKKYPCTITWKKNPS   | Negative |
| Q4LCS8 | FSVIVILFSLIGSIHGADV    | Negative |
| Q4LCS8 | IVILFSLIGSIHGADVPGNY   | Negative |
| Q4LCS8 | GNYP LDRSGKKYPCTITWKK  | Negative |
| Q4LCS8 | VLFSVIVILFSLIGSIHGAD   | Negative |
| Q4LCS8 | LFSVIVILFSLIGSIHGADV   | Negative |
| Q4LCS8 | YPLDRSGKKYPCTITWKKNP   | Negative |
| Q4LCS9 | VILFSLIGSIHGADVPGNYP   | Negative |
| Q4LCS9 | PLDSSDDTYLCAPLGENPSC   | Negative |
| Q4LCS9 | HGADVPGNYPLDSSDDTYLC   | Negative |
| Q4LCS9 | LFSLIGSIHGADVPGNYPLD   | Negative |
| Q4LCS9 | GNYP L DSSDDTYLCAPLGEN | Negative |
| Q4LCS9 | VPGNYPLDSSDDTYLCAPLG   | Negative |
| Q4LCS9 | NYPLDSSDDTYLCAPLGENP   | Negative |
| Q4LCS9 | IVILFSLIGSIHGADVPGNY   | Negative |
| Q4LCS9 | FSIIVILFSLIGSIHGADV    | Negative |
| Q4LCS9 | PGNYPLDSSDDTYLCAPLGE   | Negative |
| Q4LCS9 | IIVILFSLIGSIHGADVPGN   | Negative |
| Q4LCS9 | IHGADVPGNYPLDSSDDTYL   | Negative |
| Q4LCS9 | IGSIHGADVPGNYPLDSSDD   | Negative |
| Q4LCS9 | LFSIIVILFSLIGSIHGADV   | Negative |
| Q4LCS9 | GSIHGADVPGNYPLDSSDDT   | Negative |
| Q4LCS9 | MKLMLFSIIVILFSLIGSIH   | Negative |
| Q4LCS9 | MMKLMLFSIIVILFSLIGSI   | Negative |
| Q4LCS9 | GADVPGNYPLDSSDDTYLCA   | Negative |
| Q4LCS9 | YPLDSSDDTYLCAPLGENPS   | Negative |
| Q4LCS9 | ADVPGNYPLDSSDDTYLCAP   | Negative |
| Q4LCS9 | FSLIGSIHGADVPGNYPLDS   | Negative |
| Q4LCS9 | LMLFSIIVILFSLIGSIHGA   | Negative |
| Q4LCS9 | KLMLFSIIVILFSLIGSIHG   | Negative |
| Q4LCS9 | SIHGADVPGNYPLDSSDDTY   | Negative |
| Q4LCS9 | ILFSLIGSIHGADVPGNYPL   | Negative |
| Q4LCS9 | SLIGSIHGADVPGNYPLDSS   | Negative |
| Q4LCS9 | LIGSIHGADVPGNYPLDSSD   | Negative |
| Q4LCS9 | MLFSIIVILFSLIGSIHGAD   | Negative |
| Q4LCS9 | DVPGNYPLDSSDDTYLCAPL   | Negative |
| Q4PRD1 | GTEAVLDCPSGWLSYEQHCY   | Negative |
| Q4PRD1 | LSGTEAVLDCPSGWLSYEQH   | Negative |
| Q4PRD1 | LVVFLSLSGTEAVLDCPSGW   | Negative |
| Q4PRD1 | VLDCPSGWLSYEQHCYKGFN   | Negative |

|        |                      |          |
|--------|----------------------|----------|
| Q4PRD1 | SLSGTEAVLDCPSGWLSYEQ | Negative |
| Q4PRD1 | AVLDCPSGWLSYEQHCYKGF | Negative |
| Q4PRD1 | PSGWLSYEQHCYKGFNDLKN | Negative |
| Q4PRD1 | TEAVLDCPSGWLSYEQHCYK | Negative |
| Q4PRD1 | LSLSGTEAVLDCPSGWLSYE | Negative |
| Q4PRD1 | MGRFISVSFGCLVVFLSLSG | Negative |
| Q4PRD1 | SFGCLVVFLSLSGTEAVLDC | Negative |
| Q4PRD1 | CPSGWLSYEQHCYKGFNDLK | Negative |
| Q4PRD1 | FISVSFGCLVVFLSLSGTEA | Negative |
| Q4PRD1 | RFISVSFGCLVVFLSLSGTE | Negative |
| Q4PRD1 | FLSLSGTEAVLDCPSGWLSY | Negative |
| Q4PRD1 | GRFISVSFGCLVVFLSLSGT | Negative |
| Q4PRD1 | EAVLDCPSGWLSYEQHCYKG | Negative |
| Q4PRD1 | VSFGCLVVFLSLSGTEAVLD | Negative |
| Q4PRD1 | VFLSLSGTEAVLDCPSGWLS | Negative |
| Q4PRD1 | SGTEAVLDCPSGWLSYEQHC | Negative |
| Q4PRD1 | ISVSFGCLVVFLSLSGTEAV | Negative |
| Q4PRD1 | SVSFGCLVVFLSLSGTEAVL | Negative |
| Q4PRD1 | GWLSYEQHCYKGFNDLKNWT | Negative |
| Q4PRD1 | GCLVVFLSLSGTEAVLDCPS | Negative |
| Q4PRD1 | CLVVFLSLSGTEAVLDCPSG | Negative |
| Q4PRD1 | VVFLSLSGTEAVLDCPSGWL | Negative |
| Q4PRD1 | SGWLSYEQHCYKGFNDLKNW | Negative |
| Q4PRD1 | DCPSGWLSYEQHCYKGFNDL | Negative |
| Q4PRD1 | LDCPSGWLSYEQHCYKGFND | Negative |
| Q4PRD2 | LLVVFLSLSGTGAGLDCPPD | Negative |
| Q4PRD2 | LVVFLSLSGTGAGLDCPPDS | Negative |
| Q4PRD2 | VSFGLLVVFLSLSGTGAGLD | Negative |
| Q4PRD2 | DSSLYRYFCYRVFKEHKTWE | Negative |
| Q4PRD2 | LSLSGTGAGLDCPPDSSLYR | Negative |
| Q4PRD2 | PDSSLYRYFCYRVFKEHKTW | Negative |
| Q4PRD2 | LDCPPDSSLYRYFCYRVFKE | Negative |
| Q4PRD2 | GLDCPPDSSLYRYFCYRVFK | Negative |
| Q4PRD2 | GRFISVSFGLLVVFLSLSGT | Negative |
| Q4PRD2 | SGTGAGLDCPPDSSLYRYFC | Negative |
| Q4PRD2 | SVSFGLLVVFLSLSGTGAGL | Negative |
| Q4PRD2 | LSGTGAGLDCPPDSSLYRYF | Negative |
| Q4PRD2 | DCPPDSSLYRYFCYRVFKEH | Negative |
| Q4PRD2 | AGLDCPPDSSLYRYFCYRVF | Negative |
| Q4PRD2 | SFGLLVVFLSLSGTGAGLDC | Negative |
| Q4PRD2 | GAGLDCPPDSSLYRYFCYRV | Negative |
| Q4PRD2 | ISVSFGLLVVFLSLSGTGAG | Negative |
| Q4PRD2 | GTGAGLDCPPDSSLYRYFCY | Negative |
| Q4PRD2 | SLSGTGAGLDCPPDSSLYRY | Negative |
| Q4PRD2 | TGAGLDCPPDSSLYRYFCYR | Negative |
| Q4PRD2 | PPDSSLYRYFCYRVFKEHKT | Negative |



|        |                      |          |
|--------|----------------------|----------|
| Q4PRD2 | FGLLVVFLSLSGTGAGLDCP | Negative |
| Q4PRD2 | VVFLSLSGTGAGLDCPPDSS | Negative |
| Q4PRD2 | FISVSFGLLVVFLSLSGTGA | Negative |
| Q4PRD2 | FLSLSGTGAGLDCPPDSSLY | Negative |
| Q4PRD2 | MGRFISVSFGLLVVFLSLSG | Negative |
| Q4PRD2 | CPPDSSLYRYFCYRVFKEHK | Negative |
| Q4PRD2 | VFLSLSGTGAGLDCPPDSSL | Negative |
| Q4PRD2 | RFISVSFGLLVVFLSLSGTG | Negative |
| Q4TUA4 | DKNCAYFCGRNAYCDDECKK | Negative |
| Q4TUA4 | MTGVESVRDGYIADDKNCAY | Negative |
| Q4TUA4 | LALLMTGVESVRDGYIADD  | Negative |
| Q4TUA4 | FFSLALLMTGVESVRDGYI  | Negative |
| Q4TUA4 | GVESVRDGYIADDKNCAYFC | Negative |
| Q4TUA4 | YLVFFSLALLMTGVESVRD  | Negative |
| Q4TUA4 | NYLVFFSLALLMTGVESVR  | Negative |
| Q4TUA4 | YIADDKNCAYFCGRNAYCDD | Negative |
| Q4TUA4 | MNYLVFFSLALLMTGVESV  | Negative |
| Q4TUA4 | VRDGYIADDKNCAYFCGRNA | Negative |
| Q4TUA4 | DGYIADDKNCAYFCGRNAYC | Negative |
| Q4TUA4 | LMTGVESVRDGYIADDKNCA | Negative |
| Q4TUA4 | KNCAYFCGRNAYCDDECKKK | Negative |
| Q4TUA4 | DDKNCAYFCGRNAYCDDECK | Negative |
| Q4TUA4 | LLMTGVESVRDGYIADDKN  | Negative |
| Q4TUA4 | IADDKNCAYFCGRNAYCDDE | Negative |
| Q4TUA4 | GYIADDKNCAYFCGRNAYCD | Negative |
| Q4TUA4 | LVFFSLALLMTGVESVRDG  | Negative |
| Q4TUA4 | RDGYIADDKNCAYFCGRNAY | Negative |
| Q4TUA4 | TGVESVRDGYIADDKNCAYF | Negative |
| Q4TUA4 | LLMTGVESVRDGYIADDKNC | Negative |
| Q4TUA4 | FSLALLMTGVESVRDGYIA  | Negative |
| Q4TUA4 | ALLMTGVESVRDGYIADDK  | Negative |
| Q4TUA4 | SLALLMTGVESVRDGYIAD  | Negative |
| Q4TUA4 | ESVRDGYIADDKNCAYFCGR | Negative |
| Q4TUA4 | SVRDGYIADDKNCAYFCGRN | Negative |
| Q4TUA4 | NCAYFCGRNAYCDDECKKKG | Negative |
| Q4TUA4 | ADDKNCAYFCGRNAYCDDEC | Negative |
| Q4TUA4 | VESVRDGYIADDKNCAYFCG | Negative |
| Q4V4I9 | MWYSKCSWTLVVLVALFALV | Negative |
| Q4V4I9 | EYGHSCWGAHGKRSGGKAVI | Negative |
| Q4V4I9 | VTGSCLEYGHSCWGAHGKRS | Negative |
| Q4V4I9 | SKCSWTLVVLVALFALVTGS | Negative |
| Q4V4I9 | LVVLVALFALVTGSCLEYGH | Negative |
| Q4V4I9 | VVLVALFALVTGSCLEYGHS | Negative |
| Q4V4I9 | SCWGAHGKRSGGKAVIDAKQ | Negative |
| Q4V4I9 | LVALFALVTGSCLEYGHSCW | Negative |
| Q4V4I9 | CSWTLVVLVALFALVTGSCL | Negative |

|        |                      |          |
|--------|----------------------|----------|
| Q4V4I9 | ALVTGSCLEYGHSCWGAHGK | Negative |
| Q4V4I9 | VALFALVTGSCLEYGHSCWG | Negative |
| Q4V4I9 | TGSCLEYGHSCWGAHGKRSG | Negative |
| Q4V4I9 | WYSKCSWTLVVLVALFALVT | Negative |
| Q4V4I9 | ALFALVTGSCLEYGHSCWGA | Negative |
| Q4V4I9 | HSCWGAHGKRSGGKAVIDAK | Negative |
| Q4V4I9 | VLVALFALVTGSCLEYGHSC | Negative |
| Q4V4I9 | LFALVTGSCLEYGHSCWGAH | Negative |
| Q4V4I9 | SCLEYGHSCWGAHGKRSGGK | Negative |
| Q4V4I9 | GSCLEYGHSCWGAHGKRSGG | Negative |
| Q4V4I9 | FALVTGSCLEYGHSCWGAHG | Negative |
| Q4V4I9 | LVTGSCLEYGHSCWGAHGKR | Negative |
| Q4V4I9 | GHSCWGAHGKRSGGKAVIDA | Negative |
| Q4V4I9 | CLEYGHSCWGAHGKRSGGKA | Negative |
| Q4V4I9 | KCSWTLVVLVALFALVTGSC | Negative |
| Q4V4I9 | LEYGHSCWGAHGKRSGGKAV | Negative |
| Q4V4I9 | YSKCSWTLVVLVALFALVTG | Negative |
| Q4V4I9 | TLVVLVALFALVTGSCLEYG | Negative |
| Q4V4I9 | YGHSCWGAHGKRSGGKAVID | Negative |
| Q4V4I9 | SWTLVVLVALFALVTGSCLE | Negative |
| Q4VYA5 | GNNILSVHILDQQTGKPAPG | Negative |
| Q4VYA5 | MKRHILATVIASLVAAPAMA | Negative |
| Q4VYA5 | NNILSVHILDQQTGKPAPGV | Negative |
| Q4VYA5 | RHILATVIASLVAAPAMALA | Negative |
| Q4VYA5 | ILSVHILDQQTGKPAPGVEV | Negative |
| Q4VYA5 | LAAGNNILSVHILDQQTGKP | Negative |
| Q4VYA5 | LVAAPAMALAAGNNILSVHI | Negative |
| Q4VYA5 | NILSVHILDQQTGKPAPGVE | Negative |
| Q4VYA5 | AAGNNILSVHILDQQTGKPA | Negative |
| Q4VYA5 | AAPAMALAAGNNILSVHILD | Negative |
| Q4VYA5 | AGNNILSVHILDQQTGKPAP | Negative |
| Q4VYA5 | PAMALAAGNNILSVHILDQQ | Negative |
| Q4VYA5 | IASLVAAPAMALAAGNNILS | Negative |
| Q4VYA5 | VIASLVAAPAMALAAGNNIL | Negative |
| Q4VYA5 | ASLVAAPAMALAAGNNILSV | Negative |
| Q4VYA5 | KRHILATVIASLVAAPAMAL | Negative |
| Q4VYA5 | MALAAGNNILSVHILDQQTG | Negative |
| Q4VYA5 | VAAPAMALAAGNNILSVHIL | Negative |
| Q4VYA5 | LSVHILDQQTGKPAPGVEVV | Negative |
| Q4VYA5 | ATVIASLVAAPAMALAAGNN | Negative |
| Q4VYA5 | ILATVIASLVAAPAMALAAG | Negative |
| Q4VYA5 | LATVIASLVAAPAMALAAGN | Negative |
| Q4VYA5 | VHILDQQTGKPAPGVEVVLE | Negative |
| Q4VYA5 | ALAAGNNILSVHILDQQTGK | Negative |
| Q4VYA5 | AMALAAGNNILSVHILDQQT | Negative |
| Q4VYA5 | APAMALAAGNNILSVHILDQ | Negative |

|        |                       |          |
|--------|-----------------------|----------|
| Q4VYA5 | SVHILDQQTGKPAPGVEVVL  | Negative |
| Q4VYA5 | HILATVIASLVAAPAMALAA  | Negative |
| Q4VYA5 | SLVAAPAMALAAGNNILSVH  | Negative |
| Q4W1I8 | LFMLLISVNYFMSCNAQLST  | Negative |
| Q4W1I8 | MLLISVNYFMSCNAQLSTTF  | Negative |
| Q4W1I8 | CNAQLSTTFYD TTCPTALST | Negative |
| Q4W1I8 | LMVPLFMLLISVNYFMSCNA  | Negative |
| Q4W1I8 | SSGTILMVPLFMLLISVNYF  | Negative |
| Q4W1I8 | YFMSCNAQLSTTFYD TTCPT | Negative |
| Q4W1I8 | SCNAQLSTTFYD TTCPTALS | Negative |
| Q4W1I8 | MVPLFMLLISVNYFMSCNAQ  | Negative |
| Q4W1I8 | ILMVPLFMLLISVNYFMSCN  | Negative |
| Q4W1I8 | VNYFMSCNAQLSTTFYD TTC | Negative |
| Q4W1I8 | LISVNYFMSCNAQLSTTFYD  | Negative |
| Q4W1I8 | TILMVPLFMLLISVNYFMSC  | Negative |
| Q4W1I8 | YHKSSGTILMVPLFMLLISV  | Negative |
| Q4W1I8 | SVNYFMSCNAQLSTTFYD TT | Negative |
| Q4W1I8 | LLISVNYFMSCNAQLSTTFY  | Negative |
| Q4W1I8 | AQLSTTFYD TTCPTALSTIR | Negative |
| Q4W1I8 | ISVNYFMSCNAQLSTTFYDT  | Negative |
| Q4W1I8 | HKSSGTILMVPLFMLLISVN  | Negative |
| Q4W1I8 | NAQLSTTFYD TTCPTALSTI | Negative |
| Q4W1I8 | GTILMVPLFMLLISVNYFMS  | Negative |
| Q4W1I8 | KSSGTILMVPLFMLLISVNY  | Negative |
| Q4W1I8 | FMSCNAQLSTTFYD TTCPTA | Negative |
| Q4W1I8 | SGTILMVPLFMLLISVNYFM  | Negative |
| Q4W1I8 | PLFMLLISVNYFMSCNAQLS  | Negative |
| Q4W1I8 | NYFMSCNAQLSTTFYD TTCP | Negative |
| Q4W1I8 | MSCNAQLSTTFYD TTCPTAL | Negative |
| Q4W1I8 | MSYHKSSGTILMVPLFMLLI  | Negative |
| Q4W1I8 | VPLFMLLISVNYFMSCNAQL  | Negative |
| Q4W1I8 | SYHKSSGTILMVPLFMLLIS  | Negative |
| Q4W6G0 | LAVAVLLSLAGTPALAADIP  | Negative |
| Q4W6G0 | SLAGTPALAADIPANVDGAR  | Negative |
| Q4W6G0 | LSLAGTPALAADIPANVDGA  | Negative |
| Q4W6G0 | LASLPLKSLAVAVLLSLAGT  | Negative |
| Q4W6G0 | ALAADIPANVDGARIIAADK  | Negative |
| Q4W6G0 | LAGTPALAADIPANVDGARI  | Negative |
| Q4W6G0 | RQTGLASLPLKSLAVAVLLS  | Negative |
| Q4W6G0 | GLASLPLKSLAVAVLLSLAG  | Negative |
| Q4W6G0 | LLSLAGTPALAADIPANVDG  | Negative |
| Q4W6G0 | SLPLKSLAVAVLLSLAGTPA  | Negative |
| Q4W6G0 | VAVLLSLAGTPALAADIPAN  | Negative |
| Q4W6G0 | TPALAADIPANVDGARIIAA  | Negative |
| Q4W6G0 | SLAVAVLLSLAGTPALAADI  | Negative |
| Q4W6G0 | KSLAVAVLLSLAGTPALAAD  | Negative |

|        |                      |          |
|--------|----------------------|----------|
| Q4W6G0 | QTGLASLPLKSLAVAVLLSL | Negative |
| Q4W6G0 | PLKSLAVAVLLSLAGTPALA | Negative |
| Q4W6G0 | TGLASLPLKSLAVAVLLSLA | Negative |
| Q4W6G0 | AVLLSLAGTPALAADIPANV | Negative |
| Q4W6G0 | LPLKSLAVAVLLSLAGTPAL | Negative |
| Q4W6G0 | ADIPANVDGARIIAADKEPG | Negative |
| Q4W6G0 | VLLSLAGTPALAADIPANVD | Negative |
| Q4W6G0 | AGTPALAADIPANVDGARII | Negative |
| Q4W6G0 | LKSLAVAVLLSLAGTPALAA | Negative |
| Q4W6G0 | MRQTGLASLPLKSLAVAVLL | Negative |
| Q4W6G0 | GTPALAADIPANVDGARIIA | Negative |
| Q4W6G0 | LAADIPANVDGARIIAADKE | Negative |
| Q4W6G0 | PALAADIPANVDGARIIAAD | Negative |
| Q4W6G0 | AADIPANVDGARIIAADKEP | Negative |
| Q4W6G0 | ASLPLKSLAVAVLLSLAGTP | Negative |
| Q4WBS1 | PWGQCGRSYTGETSCVSGW  | Negative |
| Q4WBS1 | GPWGQCGRSYTGETSCVSG  | Negative |
| Q4WBS1 | QVGPWGQCGRSYTGETSCV  | Negative |
| Q4WBS1 | GGRSYTGETSCVSGWSCVLF | Negative |
| Q4WBS1 | PSVALLSAIGAVAAQVGPWG | Negative |
| Q4WBS1 | SAIGAVAAQVGPWGQCGRS  | Negative |
| Q4WBS1 | VAAQVGPWGQCGRSYTGET  | Negative |
| Q4WBS1 | ALLSAIGAVAAQVGPWGQCG | Negative |
| Q4WBS1 | RSYTGETSCVSGWSCVLFNE | Negative |
| Q4WBS1 | LPSVALLSAIGAVAAQVGPW | Negative |
| Q4WBS1 | SVALLSAIGAVAAQVGPWGQ | Negative |
| Q4WBS1 | AAQVGPWGQCGRSYTGETS  | Negative |
| Q4WBS1 | CGGRSYTGETSCVSGWSCVL | Negative |
| Q4WBS1 | LLSAIGAVAAQVGPWGQCGG | Negative |
| Q4WBS1 | GQCGRSYTGETSCVSGWSC  | Negative |
| Q4WBS1 | LSAIGAVAAQVGPWGQCGR  | Negative |
| Q4WBS1 | QCGRSYTGETSCVSGWSCV  | Negative |
| Q4WBS1 | MHPLPSVALLSAIGAVAAQV | Negative |
| Q4WBS1 | VALLSAIGAVAAQVGPWGQC | Negative |
| Q4WBS1 | SYTGETSCVSGWSCVLFNEW | Negative |
| Q4WBS1 | VGPWGQCGRSYTGETSCVS  | Negative |
| Q4WBS1 | WGQCGRSYTGETSCVSGWS  | Negative |
| Q4WBS1 | AQVGPWGQCGRSYTGETSC  | Negative |
| Q4WBS1 | IGAVAAQVGPWGQCGRSYT  | Negative |
| Q4WBS1 | HPLPSVALLSAIGAVAAQVG | Negative |
| Q4WBS1 | AIGAVAAQVGPWGQCGRSY  | Negative |
| Q4WBS1 | GRSYTGETSCVSGWSCVLFN | Negative |
| Q4WBS1 | GAVAAQVGPWGQCGRSYTG  | Negative |
| Q4WBS1 | AVAAQVGPWGQCGRSYTGE  | Negative |
| Q4WZ11 | FVKQELIGQPYTDAVANALQ | Negative |
| Q4WZ11 | LAGLQAALADPATCEKEAQF | Negative |

|        |                      |          |
|--------|----------------------|----------|
| Q4WZ11 | ALADPATCEKEAQFVKQELI | Negative |
| Q4WZ11 | ADPATCEKEAQFVKQELIGQ | Negative |
| Q4WZ11 | CEKEAQFVKQELIGQPYTDA | Negative |
| Q4WZ11 | KFSLACLLALAGLQAALADP | Negative |
| Q4WZ11 | AALADPATCEKEAQFVKQEL | Negative |
| Q4WZ11 | QFVKQELIGQPYTDAVANAL | Negative |
| Q4WZ11 | DPATCEKEAQFVKQELIGQP | Negative |
| Q4WZ11 | AGLQAALADPATCEKEAQFV | Negative |
| Q4WZ11 | CLLALAGLQAALADPATCEK | Negative |
| Q4WZ11 | KEAQFVKQELIGQPYTDAVA | Negative |
| Q4WZ11 | FSLACLLALAGLQAALADPA | Negative |
| Q4WZ11 | SLACLLALAGLQAALADPAT | Negative |
| Q4WZ11 | QAALADPATCEKEAQFVKQE | Negative |
| Q4WZ11 | EKEAQFVKQELIGQPYTDAV | Negative |
| Q4WZ11 | MKFSLACLLALAGLQAALAD | Negative |
| Q4WZ11 | LADPATCEKEAQFVKQELIG | Negative |
| Q4WZ11 | GLQAALADPATCEKEAQFVK | Negative |
| Q4WZ11 | EAQFVKQELIGQPYTDAVAN | Negative |
| Q4WZ11 | LLALAGLQAALADPATCEKE | Negative |
| Q4WZ11 | PATCEKEAQFVKQELIGQPY | Negative |
| Q4WZ11 | LQAALADPATCEKEAQFVKQ | Negative |
| Q4WZ11 | ALAGLQAALADPATCEKEAQ | Negative |
| Q4WZ11 | LALAGLQAALADPATCEKEA | Negative |
| Q4WZ11 | ACLLALAGLQAALADPATCE | Negative |
| Q4WZ11 | ATCEKEAQFVKQELIGQPYT | Negative |
| Q4WZ11 | AQFVKQELIGQPYTDAVANA | Negative |
| Q4WZ11 | TCEKEAQFVKQELIGQPYTD | Negative |
| Q50833 | GDVEGFKVIDNGEPTADIVV | Negative |
| Q50833 | LATGVFAVEKIGDVEGFKVI | Negative |
| Q50833 | EKIGDVEGFKVIDNGEPTAD | Negative |
| Q50833 | SALATGVFAVEKIGDVEGFK | Negative |
| Q50833 | VFAVEKIGDVEGFKVIDNGE | Negative |
| Q50833 | IAAGSAMVASALATGVFAVE | Negative |
| Q50833 | AVEKIGDVEGFKVIDNGEPT | Negative |
| Q50833 | AGSAMVASALATGVFAVEKI | Negative |
| Q50833 | VEKIGDVEGFKVIDNGEPTA | Negative |
| Q50833 | AAGSAMVASALATGVFAVEK | Negative |
| Q50833 | ATGVFAVEKIGDVEGFKVID | Negative |
| Q50833 | KKIGAIAAGSAMVASALATG | Negative |
| Q50833 | GAIAAGSAMVASALATGVFA | Negative |
| Q50833 | IGDVEGFKVIDNGEPTADIV | Negative |
| Q50833 | TGVFAVEKIGDVEGFKVIDN | Negative |
| Q50833 | VEGFKVIDNGEPTADIVVGS | Negative |
| Q50833 | SAMVASALATGVFAVEKIGD | Negative |
| Q50833 | MVASALATGVFAVEKIGDVE | Negative |
| Q50833 | AIAAGSAMVASALATGVFAV | Negative |

|        |                      |          |
|--------|----------------------|----------|
| Q50833 | DVEGFKVIDNGEPTADIVVG | Negative |
| Q50833 | IGAIAAGSAMVASALATGVF | Negative |
| Q50833 | KIGAIAAGSAMVASALATGV | Negative |
| Q50833 | KIGDVEGFKVIDNGEPTADI | Negative |
| Q50833 | GVFAVEKIGDVEGFKVIDNG | Negative |
| Q50833 | ALATGVFAVEKIGDVEGFKV | Negative |
| Q50833 | AMVASALATGVFAVEKIGDV | Negative |
| Q50833 | ASALATGVFAVEKIGDVEGF | Negative |
| Q50833 | VASALATGVFAVEKIGDVEG | Negative |
| Q50833 | FAVEKIGDVEGFKVIDNGEP | Negative |
| Q51372 | LSALAAGLCLAQAALAADPG | Negative |
| Q51372 | AGLCLAQAALAADPGAAPSY | Negative |
| Q51372 | TSRLFRLSALAAGLCLAQAA | Negative |
| Q51372 | GLCLAQAALAADPGAAPSYQ | Negative |
| Q51372 | MKTRTSRLFRLSALAAGLCL | Negative |
| Q51372 | RLFRLSALAAGLCLAQAALA | Negative |
| Q51372 | DPGAAPSYQALPAGNLCPAA | Negative |
| Q51372 | AAGLCLAQAALAADPGAAPS | Negative |
| Q51372 | AQAALAADPGAAPSYQALPA | Negative |
| Q51372 | AADPGAAPSYQALPAGNLCP | Negative |
| Q51372 | KTRTSRLFRLSALAAGLCLA | Negative |
| Q51372 | LAADPGAAPSYQALPAGNLC | Negative |
| Q51372 | SRLFRLSALAAGLCLAQAAL | Negative |
| Q51372 | PGAAPSYQALPAGNLCPAAA | Negative |
| Q51372 | LAAGLCLAQAALAADPGAAP | Negative |
| Q51372 | ALAADPGAAPSYQALPAGNL | Negative |
| Q51372 | CLAQAALAADPGAAPSYQAL | Negative |
| Q51372 | GAAPSYQALPAGNLCPAAAY | Negative |
| Q51372 | RLSALAAGLCLAQAALAADP | Negative |
| Q51372 | LCLAQAALAADPGAAPSYQA | Negative |
| Q51372 | ADPGAAPSYQALPAGNLCPA | Negative |
| Q51372 | QAALAADPGAAPSYQALPAG | Negative |
| Q51372 | FRLSALAAGLCLAQAALAAD | Negative |
| Q51372 | LAQAALAADPGAAPSYQALP | Negative |
| Q51372 | ALAAGLCLAQAALAADPGAA | Negative |
| Q51372 | LFRLSALAAGLCLAQAALAA | Negative |
| Q51372 | TRTSRLFRLSALAAGLCLAQ | Negative |
| Q51372 | AALAADPGAAPSYQALPAGN | Negative |
| Q51372 | RTSRLFRLSALAAGLCLAQA | Negative |
| Q51485 | HAAEAFSPNSKWMLGDWGGK | Negative |
| Q51485 | ALGALGLGSAAHAAEAFSPN | Negative |
| Q51485 | LGLGSAAHAAEAFSPNSKWM | Negative |
| Q51485 | AHAAEAFSPNSKWMLGDWGG | Negative |
| Q51485 | TRPAARTVGCLFALGALGLG | Negative |
| Q51485 | KKTRPAARTVGCLFALGALG | Negative |
| Q51485 | KTRPAARTVGCLFALGALGL | Negative |

|        |                       |          |
|--------|-----------------------|----------|
| Q51485 | RPAARTVGCLFALGALGLGS  | Negative |
| Q51485 | MYKNKKTRPAARTVGCLFAL  | Negative |
| Q51485 | AARTVGCLFALGALGLGSAA  | Negative |
| Q51485 | PAARTVGCLFALGALGLGSA  | Negative |
| Q51485 | CLFALGALGLGSAAHAAEAF  | Negative |
| Q51485 | KNKKTRPAARTVGCLFALGA  | Negative |
| Q51485 | AAHAAEAFSPNSKWMLGDWG  | Negative |
| Q51485 | GCLFALGALGLGSAAHAAEA  | Negative |
| Q51485 | TVGCLFALGALGLGSAAHAA  | Negative |
| Q51485 | GSAAHAAEAFSPNSKWMLGD  | Negative |
| Q51485 | GALGLGSAAHAAEAFSPNSK  | Negative |
| Q51485 | LGALGLGSAAHAAEAFSPNS  | Negative |
| Q51485 | NKKTRPAARTVGCLFALGAL  | Negative |
| Q51485 | YKNKKTRPAARTVGCLFALG  | Negative |
| Q51485 | SAAHAAEAFSPNSKWMLGDW  | Negative |
| Q51485 | ARTVGCLFALGALGLGSAAH  | Negative |
| Q51485 | VGCLFALGALGLGSAAHAAE  | Negative |
| Q51485 | ALGLGSAAHAAEAFSPNSKW  | Negative |
| Q51485 | FALGALGLGSAAHAAEAFSP  | Negative |
| Q51485 | GLGSAAHAAEAFSPNSKWML  | Negative |
| Q51485 | RTVGCLFALGALGLGSAAHA  | Negative |
| Q51485 | LGSAAHAAEAFSPNSKWMLG  | Negative |
| Q51705 | RRALLGATAGGA AVAGAFGG | Negative |
| Q51705 | SKQEKGLSRRALLGATAGGA  | Negative |
| Q51705 | GRLALGPAALGLGTAGVAT   | Negative |
| Q51705 | AGAFGGRLALGPAALGLGTA  | Negative |
| Q51705 | AVAGAFGGRLALGPAALGLG  | Negative |
| Q51705 | SRRALLGATAGGA AVAGAFG | Negative |
| Q51705 | ESKQEKGLSRRALLGATAGG  | Negative |
| Q51705 | ATAGGA AVAGAFGGRLALGP | Negative |
| Q51705 | LGATAGGA AVAGAFGGRLAL | Negative |
| Q51705 | AGGA AVAGAFGGRLALGPAA | Negative |
| Q51705 | GLSRRALLGATAGGA AVAGA | Negative |
| Q51705 | GAFGGRLALGPAALGLGTAG  | Negative |
| Q51705 | AAVAGAFGGRLALGPAALGL  | Negative |
| Q51705 | GA AVAGAFGGRLALGPAALG | Negative |
| Q51705 | QEKGLSRRALLGATAGGA AV | Negative |
| Q51705 | MESKQEKGLSRRALLGATAG  | Negative |
| Q51705 | GRLALGPAALGLGTAGVATV  | Negative |
| Q51705 | KQEKGLSRRALLGATAGGAA  | Negative |
| Q51705 | TAGGA AVAGAFGGRLALGPA | Negative |
| Q51705 | FGGRLALGPAALGLGTAGVA  | Negative |
| Q51705 | KGLSRRALLGATAGGA AVAG | Negative |
| Q51705 | EKGLSRRALLGATAGGA AVA | Negative |
| Q51705 | GATAGGA AVAGAFGGRLALG | Negative |
| Q51705 | GGA AVAGAFGGRLALGPAAL | Negative |

|        |                      |          |
|--------|----------------------|----------|
| Q51705 | ALLGATAGGAAVAGAFGGRL | Negative |
| Q51705 | LSRRALLGATAGGAAVAGAF | Negative |
| Q51705 | LLGATAGGAAVAGAFGGRLA | Negative |
| Q51705 | RALLGATAGGAAVAGAFGGR | Negative |
| Q51705 | AFGGRLALGPAALGLGTAGV | Negative |
| Q51705 | VAGAFGGRLALGPAALGLGT | Negative |
| Q52085 | MSATCLTCVKEGAVCDATAN | Negative |
| Q52085 | AVCDATANICEEGTVCIKPN | Negative |
| Q52085 | EGAVCDATANICEEGTVCIK | Negative |
| Q52085 | NKFITLFVLLASVSVAMSAT | Negative |
| Q52085 | LLASVSVAMSATCLTCVKEG | Negative |
| Q52085 | VSVAMSATCLTCVKEGAVCD | Negative |
| Q52085 | AMSATCLTCVKEGAVCDATA | Negative |
| Q52085 | TLFVLLASVSVAMSATCLTC | Negative |
| Q52085 | SVAMSATCLTCVKEGAVCDA | Negative |
| Q52085 | LTCVKEGAVCDATANICEEG | Negative |
| Q52085 | VLLASVSVAMSATCLTCVKE | Negative |
| Q52085 | LASVSVAMSATCLTCVKEGA | Negative |
| Q52085 | KFITLFVLLASVSVAMSATC | Negative |
| Q52085 | SATCLTCVKEGAVCDATANI | Negative |
| Q52085 | FITLFVLLASVSVAMSATCL | Negative |
| Q52085 | FVLLASVSVAMSATCLTCVK | Negative |
| Q52085 | CLTCVKEGAVCDATANICEE | Negative |
| Q52085 | TCVKEGAVCDATANICEEGT | Negative |
| Q52085 | KEGAVCDATANICEEGTVCI | Negative |
| Q52085 | MNKFITLFVLLASVSVAMSA | Negative |
| Q52085 | CVKEGAVCDATANICEEGTV | Negative |
| Q52085 | ASVSVAMSATCLTCVKEGAV | Negative |
| Q52085 | SVSVAMSATCLTCVKEGAVC | Negative |
| Q52085 | VAMSATCLTCVKEGAVCDAT | Negative |
| Q52085 | GAVCDATANICEEGTVCIKP | Negative |
| Q52085 | LFVLLASVSVAMSATCLTCV | Negative |
| Q52085 | TCLTCVKEGAVCDATANICE | Negative |
| Q52085 | VKEGAVCDATANICEEGTV  | Negative |
| Q52085 | ATCLTCVKEGAVCDATANIC | Negative |
| Q52VH2 | IVSIAATASLAGPRARDLGV | Negative |
| Q52VH2 | ASLAGPRARDLGVPFEGTPG | Negative |
| Q52VH2 | WSGALPLLTAIVSIAATAS  | Negative |
| Q52VH2 | SLAGPRARDLGVPFEGTPGA | Negative |
| Q52VH2 | AGPRARDLGVPFEGTPGALN | Negative |
| Q52VH2 | ALIVSIAATASLAGPRARDL | Negative |
| Q52VH2 | PLLTAIVSIAATASLAGPR  | Negative |
| Q52VH2 | TASLAGPRARDLGVPFEGTP | Negative |
| Q52VH2 | LIVSIAATASLAGPRARDLG | Negative |
| Q52VH2 | ALPLLTAIVSIAATASLAG  | Negative |
| Q52VH2 | ATASLAGPRARDLGVPFEGT | Negative |



|        |                       |          |
|--------|-----------------------|----------|
| Q52VH2 | TALIVSIAATASLAGPRARD  | Negative |
| Q52VH2 | LWSGALPLL TALIVSIAATA | Negative |
| Q52VH2 | TQRLWSGALPLL TALIVSIA | Negative |
| Q52VH2 | LPLL TALIVSIAATASLAGP | Negative |
| Q52VH2 | STQRLWSGALPLL TALIVSI | Negative |
| Q52VH2 | IAATASLAGPRARDLGVPFE  | Negative |
| Q52VH2 | GPRARDLGVPFEGTPGALNA  | Negative |
| Q52VH2 | SIAATASLAGPRARDLGVPF  | Negative |
| Q52VH2 | LLTALIVSIAATASLAGPRA  | Negative |
| Q52VH2 | MTSTQRLWSGALPLL TALIV | Negative |
| Q52VH2 | AATASLAGPRARDLGVPFEG  | Negative |
| Q52VH2 | GALPLL TALIVSIAATASLA | Negative |
| Q52VH2 | LAGPRARDLGVPFEGTPGAL  | Negative |
| Q52VH2 | RLWSGALPLL TALIVSIAAT | Negative |
| Q52VH2 | VSIAATASLAGPRARDLGVP  | Negative |
| Q52VH2 | TSTQRLWSGALPLL TALIVS | Negative |
| Q52VH2 | QRLWSGALPLL TALIVSIAA | Negative |
| Q52VH2 | SGALPLL TALIVSIAATASL | Negative |
| Q53599 | KFKSLITTTALGVIASGA    | Negative |
| Q53599 | LITTTALGVIASGANLDT    | Negative |
| Q53599 | GANLDTNEASAAAKQIDKSS  | Negative |
| Q53599 | VIASGANLDTNEASAAAKQ   | Negative |
| Q53599 | ITTTALGVIASGANLDTN    | Negative |
| Q53599 | SLITTTALGVIASGANLD    | Negative |
| Q53599 | LGVIASGANLDTNEASAAA   | Negative |
| Q53599 | KSLITTTALGVIASGANL    | Negative |
| Q53599 | EASAAAKQIDKSSSSLHHGY  | Negative |
| Q53599 | TGANLDTNEASAAAKQIDKS  | Negative |
| Q53599 | ANLDTNEASAAAKQIDKSSS  | Negative |
| Q53599 | AAAKQIDKSSSSLHHGYSKI  | Negative |
| Q53599 | ASAAAKQIDKSSSSLHHGYS  | Negative |
| Q53599 | DTNEASAAAKQIDKSSSSLH  | Negative |
| Q53599 | MKFKSLITTTALGVIASG    | Negative |
| Q53599 | STGANLDTNEASAAAKQIDK  | Negative |
| Q53599 | NLDTNEASAAAKQIDKSSSS  | Negative |
| Q53599 | ASTGANLDTNEASAAAKQID  | Negative |
| Q53599 | LALGVIASGANLDTNEASA   | Negative |
| Q53599 | TTTALGVIASGANLDTNE    | Negative |
| Q53599 | TTLALGVIASGANLDTNEA   | Negative |
| Q53599 | NEASAAAKQIDKSSSSLHHG  | Negative |
| Q53599 | TLALGVIASGANLDTNEAS   | Negative |
| Q53599 | ALGVIASGANLDTNEASAA   | Negative |
| Q53599 | GVIASGANLDTNEASAAAK   | Negative |
| Q53599 | FKSLITTTALGVIASGAN    | Negative |
| Q53599 | TNEASAAAKQIDKSSSSLHH  | Negative |
| Q53599 | SAAAKQIDKSSSSLHHGYSK  | Negative |

|        |                       |          |
|--------|-----------------------|----------|
| Q53599 | LDTNEASAAAKQIDKSSSSL  | Negative |
| Q53B47 | LQTCEPDQKFCFRKTTMFFP  | Negative |
| Q53B47 | MKNLLLTLFLVVTIVCLDLGY | Negative |
| Q53B47 | LLTFLVVTIVCLDLGYTLIC  | Negative |
| Q53B47 | LICHRVHGLQTCEPDQKFCF  | Negative |
| Q53B47 | IVCLDLGYTLICHRVHGLQT  | Negative |
| Q53B47 | DLGYTLICHRVHGLQTCEPD  | Negative |
| Q53B47 | TLICHRVHGLQTCEPDQKFC  | Negative |
| Q53B47 | HGLQTCEPDQKFCFRKTTMF  | Negative |
| Q53B47 | VTIVCLDLGYTLICHRVHGL  | Negative |
| Q53B47 | VVTIVCLDLGYTLICHRVHG  | Negative |
| Q53B47 | GLQTCEPDQKFCFRKTTMFF  | Negative |
| Q53B47 | KNLLLTLFLVVTIVCLDLGYT | Negative |
| Q53B47 | CHRVHGLQTCEPDQKFCFRK  | Negative |
| Q53B47 | LDLGYTLICHRVHGLQTCEP  | Negative |
| Q53B47 | LTFLVVTIVCLDLGYTLICH  | Negative |
| Q53B47 | HRVHGLQTCEPDQKFCFRKT  | Negative |
| Q53B47 | YTLICHRVHGLQTCEPDQKF  | Negative |
| Q53B47 | NLLLTLFLVVTIVCLDLGYTL | Negative |
| Q53B47 | GYTLICHRVHGLQTCEPDQK  | Negative |
| Q53B47 | CLDLGYTLICHRVHGLQTCE  | Negative |
| Q53B47 | VCLDLGYTLICHRVHGLQTC  | Negative |
| Q53B47 | LGYTLICHRVHGLQTCEPDQ  | Negative |
| Q53B47 | TIVCLDLGYTLICHRVHGLQ  | Negative |
| Q53B47 | FLVVTIVCLDLGYTLICHRV  | Negative |
| Q53B47 | VHGLQTCEPDQKFCFRKTTM  | Negative |
| Q53B47 | ICHRVHGLQTCEPDQKFCFR  | Negative |
| Q53B47 | LVVTIVCLDLGYTLICHRVH  | Negative |
| Q53B47 | RVHGLQTCEPDQKFCFRKTT  | Negative |
| Q53B47 | LLLTLFLVVTIVCLDLGYTLI | Negative |
| Q53B52 | GYTLICHQRHGLQTCEPAQK  | Negative |
| Q53B52 | IVCLDLGYTLICHQRHGLQT  | Negative |
| Q53B52 | VCLDLGYTLICHQRHGLQTC  | Negative |
| Q53B52 | MKNLLLTLFLVVTIVCLDLGY | Negative |
| Q53B52 | HGLQTCEPAQKFCFAQTVMP  | Negative |
| Q53B52 | TIVCLDLGYTLICHQRHGLQ  | Negative |
| Q53B52 | LLLTLFLVVTIVCLDLGYTLI | Negative |
| Q53B52 | LTFLVVTIVCLDLGYTLICH  | Negative |
| Q53B52 | QRHGLQTCEPAQKFCFAQTV  | Negative |
| Q53B52 | RHGLQTCEPAQKFCFAQTVM  | Negative |
| Q53B52 | NLLLTLFLVVTIVCLDLGYTL | Negative |
| Q53B52 | LQTCEPAQKFCFAQTVMPFP  | Negative |
| Q53B52 | LGYTLICHQRHGLQTCEPAQ  | Negative |
| Q53B52 | LVVTIVCLDLGYTLICHQRH  | Negative |
| Q53B52 | KNLLLTLFLVVTIVCLDLGYT | Negative |
| Q53B52 | TLICHQRHGLQTCEPAQKFC  | Negative |

|        |                      |          |
|--------|----------------------|----------|
| Q53B52 | VVTIVCLDLGYTLICHQRHG | Negative |
| Q53B52 | LICHQRHGLQTCEPAQKFCF | Negative |
| Q53B52 | FLVVTIVCLDLGYTLICHQR | Negative |
| Q53B52 | VTIVCLDLGYTLICHQRHGL | Negative |
| Q53B52 | ICHQRHGLQTCEPAQKFCFA | Negative |
| Q53B52 | LLTFLVVTIVCLDLGYTLIC | Negative |
| Q53B52 | CHQRHGLQTCEPAQKFCFAQ | Negative |
| Q53B52 | YTLICHQRHGLQTCEPAQKF | Negative |
| Q53B52 | LDLGYTLICHQRHGLQTCEP | Negative |
| Q53B52 | GLQTCEPAQKFCFAQTVMPF | Negative |
| Q53B52 | HQRHGLQTCEPAQKFCFAQT | Negative |
| Q53B52 | DLGYTLICHQRHGLQTCEPA | Negative |
| Q53B52 | CLDLGYTLICHQRHGLQTCE | Negative |
| Q53B53 | ILCLDLGYTTKCYITPDVKS | Negative |
| Q53B53 | CYITPDVKSETCPDGENICY | Negative |
| Q53B53 | LVVVVILCLDLGYTTKCYIT | Negative |
| Q53B53 | ITPDVKSETCPDGENICYTK | Negative |
| Q53B53 | VVTILCLDLGYTTKCYITPD | Negative |
| Q53B53 | PDVKSETCPDGENICYTKTW | Negative |
| Q53B53 | DLGYTTKCYITPDVKSETCP | Negative |
| Q53B53 | KCYITPDVKSETCPDGENIC | Negative |
| Q53B53 | VTILCLDLGYTTKCYITPDV | Negative |
| Q53B53 | CLDLGYTTKCYITPDVKSET | Negative |
| Q53B53 | LTLVVVILCLDLGYTTKCY  | Negative |
| Q53B53 | DVKSETCPDGENICYTKTWC | Negative |
| Q53B53 | VVVILCLDLGYTTKCYITP  | Negative |
| Q53B53 | KTLLTLVVVILCLDLGYT   | Negative |
| Q53B53 | LCLDLGYTTKCYITPDVKSE | Negative |
| Q53B53 | TLLTLVVVILCLDLGYTT   | Negative |
| Q53B53 | KSETCPDGENICYTKTWCDV | Negative |
| Q53B53 | GYTTKCYITPDVKSETCPDG | Negative |
| Q53B53 | TTKCYITPDVKSETCPDGEN | Negative |
| Q53B53 | TILCLDLGYTTKCYITPDVK | Negative |
| Q53B53 | LDLGYTTKCYITPDVKSETC | Negative |
| Q53B53 | TKCYITPDVKSETCPDGENI | Negative |
| Q53B53 | YTTKCYITPDVKSETCPDGE | Negative |
| Q53B53 | VKSETCPDGENICYTKTWCD | Negative |
| Q53B53 | TPDVKSETCPDGENICYTKT | Negative |
| Q53B53 | LGYTTKCYITPDVKSETCPD | Negative |
| Q53B53 | LLTLVVVILCLDLGYTTKC  | Negative |
| Q53B53 | YITPDVKSETCPDGENICYT | Negative |
| Q53B53 | LLLTLVVVILCLDLGYTTK  | Negative |
| Q53B58 | TTKCYVTPDVKSETCPAGQD | Negative |
| Q53B58 | DVKSETCPAGQDICYTETWC | Negative |
| Q53B58 | GYTTKCYVTPDVKSETCPAG | Negative |
| Q53B58 | VKSETCPAGQDICYTETWCD | Negative |

|        |                      |          |
|--------|----------------------|----------|
| Q53B58 | YTTKCYVTPDVKSETCPAGQ | Negative |
| Q53B58 | TPDVKSETCPAGQDICYTET | Negative |
| Q53B58 | TKCYVTPDVKSETCPAGQDI | Negative |
| Q53B58 | VTPDVKSETCPAGQDICYTE | Negative |
| Q53B58 | VVTIVCLDLGYTTKCYVTPD | Negative |
| Q53B58 | LTLVVVTIVCLDLGYTTKCY | Negative |
| Q53B58 | DLGYTTKCYVTPDVKSETCP | Negative |
| Q53B58 | VCLDLGYTTKCYVTPDVKSE | Negative |
| Q53B58 | PDVKSETCPAGQDICYTETW | Negative |
| Q53B58 | YVTPDVKSETCPAGQDICYT | Negative |
| Q53B58 | TLLLTLVVVTIVCLDLGYTT | Negative |
| Q53B58 | IVCLDLGYTTKCYVTPDVKS | Negative |
| Q53B58 | CLDLGYTTKCYVTPDVKSET | Negative |
| Q53B58 | VVVTIVCLDLGYTTKCYVTP | Negative |
| Q53B58 | MKTLLLTLVVVTIVCLDLGY | Negative |
| Q53B58 | KCYVTPDVKSETCPAGQDIC | Negative |
| Q53B58 | LLTLVVVTIVCLDLGYTTKC | Negative |
| Q53B58 | TIVCLDLGYTTKCYVTPDVK | Negative |
| Q53B58 | LGYYTKCYVTPDVKSETCPA | Negative |
| Q53B58 | LVVVTIVCLDLGYTTKCYVT | Negative |
| Q53B58 | LLLTLVVVTIVCLDLGYTTK | Negative |
| Q53B58 | KTLLLTLVVVTIVCLDLGYT | Negative |
| Q53B58 | LDLGYTTKCYVTPDVKSETC | Negative |
| Q53B58 | VTIVCLDLGYTTKCYVTPDV | Negative |
| Q53B58 | CYVTPDVKSETCPAGQDICY | Negative |
| Q53B59 | MTIVCLDLGYSLICFISPHD | Negative |
| Q53B59 | CFISPHDSVTCAPGENVCFL | Negative |
| Q53B59 | YSLICFISPHDSVTCAPGEN | Negative |
| Q53B59 | LGYSLICFISPHDSVTCAPG | Negative |
| Q53B59 | FISPHDSVTCAPGENVCFLK | Negative |
| Q53B59 | ICFISPHDSVTCAPGENVCF | Negative |
| Q53B59 | VCLDLGYSLICFISPHDSVT | Negative |
| Q53B59 | VVMTIVCLDLGYSLICFISP | Negative |
| Q53B59 | MKTLLLTLVVMTIVCLDLGY | Negative |
| Q53B59 | HDSVTCAPGENVCFLKSWCD | Negative |
| Q53B59 | LVVMTIVCLDLGYSLICFIS | Negative |
| Q53B59 | TLLLTLVVMTIVCLDLGYSL | Negative |
| Q53B59 | IVCLDLGYSLICFISPHDSV | Negative |
| Q53B59 | LTLVVMTIVCLDLGYSLICF | Negative |
| Q53B59 | LICFISPHDSVTCAPGENVC | Negative |
| Q53B59 | LDLGYSLICFISPHDSVTCA | Negative |
| Q53B59 | PHDSVTCAPGENVCFLKSWC | Negative |
| Q53B59 | KTLLLTLVVMTIVCLDLGYS | Negative |
| Q53B59 | DLGYSLICFISPHDSVTCAP | Negative |
| Q53B59 | CLDLGYSLICFISPHDSVTC | Negative |
| Q53B59 | TIVCLDLGYSLICFISPHDS | Negative |

|        |                      |          |
|--------|----------------------|----------|
| Q53B59 | VMTIVCLDLGYSLICFISPH | Negative |
| Q53B59 | DSVTCAPGENVCFLKSWCDA | Negative |
| Q53B59 | ISPHDSVTCAPGENVCFLKS | Negative |
| Q53B59 | SLICFISPHDSVTCAPGENV | Negative |
| Q53B59 | GYSLICFISPHDSVTCAPGE | Negative |
| Q53B59 | LLTLVVMTIVCLDLGYSLI  | Negative |
| Q53B59 | SPHDSVTCAPGENVCFLKSW | Negative |
| Q53B59 | LLTLVVMTIVCLDLGYSLIC | Negative |
| Q53NL5 | VHALLPFAAAAALLLLAAPP | Negative |
| Q53NL5 | LLPFAAAAALLLLAAPPPAT | Negative |
| Q53NL5 | TADDPGLAVYWGRHKEEGSL | Negative |
| Q53NL5 | AAAAALLLLAAPPPATADDP | Negative |
| Q53NL5 | AALLLLAAPPPATADDPGLA | Negative |
| Q53NL5 | PATADDPGLAVYWGRHKEEG | Negative |
| Q53NL5 | LLLLAAPPPATADDPGLAVY | Negative |
| Q53NL5 | ADDPGLAVYWGRHKEEGSLR | Negative |
| Q53NL5 | GLVHALLPFAAAAALLLLAA | Negative |
| Q53NL5 | ALLLLAAPPPATADDPGLAV | Negative |
| Q53NL5 | HALLPFAAAAALLLLAAPP  | Negative |
| Q53NL5 | PPATADDPGLAVYWGRHKEE | Negative |
| Q53NL5 | DDPGLAVYWGRHKEEGSLRE | Negative |
| Q53NL5 | FAAAAALLLLAAPPPATADD | Negative |
| Q53NL5 | PFAAAAALLLLAAPPPATAD | Negative |
| Q53NL5 | MGLVHALLPFAAAAALLLLA | Negative |
| Q53NL5 | LVHALLPFAAAAALLLLAAP | Negative |
| Q53NL5 | ATADDPGLAVYWGRHKEEGS | Negative |
| Q53NL5 | LAAPPPATADDPGLAVYWGR | Negative |
| Q53NL5 | LLLAAPPPATADDPGLAVYW | Negative |
| Q53NL5 | LPFAAAAALLLLAAPPPATA | Negative |
| Q53NL5 | LLAAPPPATADDPGLAVYWG | Negative |
| Q53NL5 | APPPATADDPGLAVYWGRHK | Negative |
| Q53NL5 | AAPPPATADDPGLAVYWGRH | Negative |
| Q53NL5 | AAAALLLLAAPPPATADDPG | Negative |
| Q53NL5 | ALLPFAAAAALLLLAAPPPA | Negative |
| Q53NL5 | DPGLAVYWGRHKEEGSLREA | Negative |
| Q53NL5 | PPPATADDPGLAVYWGRHKE | Negative |
| Q53NL5 | PGLAVYWGRHKEEGSLREAC | Negative |
| Q540U1 | ITLALSAVCLLFTLNHSANA | Negative |
| Q540U1 | NALVSSPSTLNPGTNVAKLA | Negative |
| Q540U1 | SANALVSSPSTLNPGTNVAK | Negative |
| Q540U1 | VCLLFTLNHSANALVSSPST | Negative |
| Q540U1 | ALSAVCLLFTLNHSANALVS | Negative |
| Q540U1 | ALVSSPSTLNPGTNVAKLAE | Negative |
| Q540U1 | TLNPGTNVAKLAEQAPVHWV | Negative |
| Q540U1 | LALSAVCLLFTLNHSANALV | Negative |
| Q540U1 | MKKITLALSAVCLLFTLNHS | Negative |

|        |                      |          |
|--------|----------------------|----------|
| Q540U1 | LVSSPSTLNPGTNVAKLAEQ | Negative |
| Q540U1 | KKITLALSAVCLLFTLNHSA | Negative |
| Q540U1 | LFTLNHSANALVSSPSTLNP | Negative |
| Q540U1 | SPSTLNPGTNVAKLAEQAPV | Negative |
| Q540U1 | LSAVCLLFTLNHSANALVSS | Negative |
| Q540U1 | PSTLNPGTNVAKLAEQAPVH | Negative |
| Q540U1 | LLFTLNHSANALVSSPSTLN | Negative |
| Q540U1 | LNHSANALVSSPSTLNPGTN | Negative |
| Q540U1 | NHSANALVSSPSTLNPGTNV | Negative |
| Q540U1 | TLNHSANALVSSPSTLNPGT | Negative |
| Q540U1 | SSPSTLNPGTNVAKLAEQAP | Negative |
| Q540U1 | AVCLLFTLNHSANALVSSPS | Negative |
| Q540U1 | ANALVSSPSTLNPGTNVAKL | Negative |
| Q540U1 | HSANALVSSPSTLNPGTNVA | Negative |
| Q540U1 | CLLFTLNHSANALVSSPSTL | Negative |
| Q540U1 | FTLNHSANALVSSPSTLNPG | Negative |
| Q540U1 | VSSPSTLNPGTNVAKLAEQA | Negative |
| Q540U1 | STLNPGTNVAKLAEQAPVHW | Negative |
| Q540U1 | KITLALSAVCLLFTLNHSAN | Negative |
| Q540U1 | TLALSAVCLLFTLNHSANAL | Negative |
| Q55025 | LVASIGIATVGFAATGVTPD | Negative |
| Q55025 | IATVGFAATGVTPDQVLSAI | Negative |
| Q55025 | WFRWLAIALASLVASIGIAT | Negative |
| Q55025 | VGFAATGVTPDQVLSAIEGT | Negative |
| Q55025 | LASLVASIGIATVGFAATGV | Negative |
| Q55025 | LAIALASLVASIGIATVGFA | Negative |
| Q55025 | MIRIRNRWFRWLAIALASLV | Negative |
| Q55025 | VASIGIATVGFAATGVTPDQ | Negative |
| Q55025 | RWFRWLAIALASLVASIGIA | Negative |
| Q55025 | RWLAIALASLVASIGIATVG | Negative |
| Q55025 | GIATVGFAATGVTPDQVLSA | Negative |
| Q55025 | IGIATVGFAATGVTPDQVLS | Negative |
| Q55025 | IALASLVASIGIATVGFAAT | Negative |
| Q55025 | ALASLVASIGIATVGFAATG | Negative |
| Q55025 | ATVGFAATGVTPDQVLSAIE | Negative |
| Q55025 | SIGIATVGFAATGVTPDQVL | Negative |
| Q55025 | SLVASIGIATVGFAATGVTP | Negative |
| Q55025 | RIRNRWFRWLAIALASLVAS | Negative |
| Q55025 | IRNRWFRWLAIALASLVASI | Negative |
| Q55025 | AIALASLVASIGIATVGFAA | Negative |
| Q55025 | TVGFAATGVTPDQVLSAIEG | Negative |
| Q55025 | NRWFRWLAIALASLVASIGI | Negative |
| Q55025 | IRIRNRWFRWLAIALASLVA | Negative |
| Q55025 | GFAATGVTPDQVLSAIEGTF | Negative |
| Q55025 | WLAIALASLVASIGIATVGF | Negative |
| Q55025 | RNRWFRWLAIALASLVASIG | Negative |

|        |                      |          |
|--------|----------------------|----------|
| Q55025 | FAATGVTPDQVLSAIEGTFG | Negative |
| Q55025 | ASIGIATVGFAATGVTPDQV | Negative |
| Q55025 | FRWLAIALASLVASIGIATV | Negative |
| Q556R7 | FSSEISVGISDSQWSCLASN | Negative |
| Q556R7 | VIFVSGECAIDFSSEISVGI | Negative |
| Q556R7 | ISSIILSIVIFVSGECAIDF | Negative |
| Q556R7 | AIDFSSEISVGISDSQWSCL | Negative |
| Q556R7 | SIVIFVSGECAIDFSSEISV | Negative |
| Q556R7 | ECAIDFSSEISVGISDSQWS | Negative |
| Q556R7 | LSIVIFVSGECAIDFSSEIS | Negative |
| Q556R7 | FVSGECAIDFSSEISVGISD | Negative |
| Q556R7 | LISSIILSIVIFVSGECAI  | Negative |
| Q556R7 | SGECAIDFSSEISVGISDSQ | Negative |
| Q556R7 | ILSIVIFVSGECAIDFSSEI | Negative |
| Q556R7 | SSIILSIVIFVSGECAIDFS | Negative |
| Q556R7 | FLIISSIILSIVIFVSGECA | Negative |
| Q556R7 | NIFLIISSIILSIVIFVSGE | Negative |
| Q556R7 | IFVSGECAIDFSSEISVGIS | Negative |
| Q556R7 | NNIFLIISSIILSIVIFVSG | Negative |
| Q556R7 | SIILSIVIFVSGECAIDFSS | Negative |
| Q556R7 | KMNNIFLIISSIILSIVIFV | Negative |
| Q556R7 | NKMNNIFLIISSIILSIVIF | Negative |
| Q556R7 | CAIDFSSEISVGISDSQWSC | Negative |
| Q556R7 | VSGECAIDFSSEISVGISDS | Negative |
| Q556R7 | MNNIFLIISSIILSIVIFVS | Negative |
| Q556R7 | IFLIISSIILSIVIFVSGEC | Negative |
| Q556R7 | DFSSEISVGISDSQWSCLAS | Negative |
| Q556R7 | GECAIDFSSEISVGISDSQW | Negative |
| Q556R7 | IILSIVIFVSGECAIDFSSE | Negative |
| Q556R7 | IDFSSEISVGISDSQWSCLA | Negative |
| Q556R7 | IVIFVSGECAIDFSSEISVG | Negative |
| Q556R7 | MNKMNNIFLIISSIILSIVI | Negative |
| Q55P57 | LVSSEKTDESPTAVSDNYMP | Negative |
| Q55P57 | LSCSFVSLVSSEKTDESPTA | Negative |
| Q55P57 | SLVSSEKTDESPTAVSDNYM | Negative |
| Q55P57 | VSLVSSEKTDESPTAVSDNY | Negative |
| Q55P57 | SSEKTDESPTAVSDNYMPKA | Negative |
| Q55P57 | SPTAVSDNYMPKATATIDPS | Negative |
| Q55P57 | VSDNYMPKATATIDPSVFAL | Negative |
| Q55P57 | SCSFVSLVSSEKTDESPTAV | Negative |
| Q55P57 | FLSCSFVSLVSSEKTDESPT | Negative |
| Q55P57 | LFFLSCSFVSLVSSEKTDES | Negative |
| Q55P57 | MRGLAKLFFLSCSFVSLVSS | Negative |
| Q55P57 | SEKTDESPTAVSDNYMPKAT | Negative |
| Q55P57 | VSSEKTDESPTAVSDNYMPK | Negative |
| Q55P57 | LAKLFFLSCSFVSLVSSEKT | Negative |

|        |                      |          |
|--------|----------------------|----------|
| Q55P57 | AKLFFLSCSFVSLVSSEKTD | Negative |
| Q55P57 | FFLSCSFVSLVSSEKTDSP  | Negative |
| Q55P57 | KTDESPTAVSDNYMPKATAT | Negative |
| Q55P57 | SFVSLVSSEKTDSPAVSD   | Negative |
| Q55P57 | TDESPTAVSDNYMPKATATI | Negative |
| Q55P57 | CSFVSLVSSEKTDSPAVS   | Negative |
| Q55P57 | DESPTAVSDNYMPKATATID | Negative |
| Q55P57 | GLAKLFFLSCSFVSLVSSEK | Negative |
| Q55P57 | PTAVSDNYMPKATATIDPSV | Negative |
| Q55P57 | ESPTAVSDNYMPKATATIDP | Negative |
| Q55P57 | TAVSDNYMPKATATIDPSVF | Negative |
| Q55P57 | EKTDESPTAVSDNYMPKATA | Negative |
| Q55P57 | FVSLVSSEKTDSPAVSDN   | Negative |
| Q55P57 | AVSDNYMPKATATIDPSVFA | Negative |
| Q55P57 | RGLAKLFFLSCSFVSLVSSE | Negative |
| Q56EB0 | LSGTAADCPPDWSSYEGSCY | Negative |
| Q56EB0 | LLVVFLSLSGTAADCPPDWS | Negative |
| Q56EB0 | FLSLSGTAADCPPDWSSYEG | Negative |
| Q56EB0 | DWSSYEGSCYRVFEQKMNWE | Negative |
| Q56EB0 | VVFLSLSGTAADCPPDWSSY | Negative |
| Q56EB0 | GTAADCPPDWSSYEGSCYRV | Negative |
| Q56EB0 | TAADCPPDWSSYEGSCYRVF | Negative |
| Q56EB0 | GRFIFVSFGLLVVFLSLSGT | Negative |
| Q56EB0 | ADCPPDWSSYEGSCYRVFEQ | Negative |
| Q56EB0 | AADCPPDWSSYEGSCYRVFE | Negative |
| Q56EB0 | IFVSFGLLVVFLSLSGTAAD | Negative |
| Q56EB0 | CPPDWSSYEGSCYRVFEQKM | Negative |
| Q56EB0 | FVSFGLLVVFLSLSGTAADC | Negative |
| Q56EB0 | SFGLLVVFLSLSGTAADCPP | Negative |
| Q56EB0 | VSFGLLVVFLSLSGTAADCP | Negative |
| Q56EB0 | LSLSGTAADCPPDWSSYEGS | Negative |
| Q56EB0 | FIFVSFGLLVVFLSLSGTAA | Negative |
| Q56EB0 | SSYEGSCYRVFEQKMNWEDA | Negative |
| Q56EB0 | MGRFIFVSFGLLVVFLSLSG | Negative |
| Q56EB0 | SLSGTAADCPPDWSSYEGSC | Negative |
| Q56EB0 | SGTAADCPPDWSSYEGSCYR | Negative |
| Q56EB0 | DCPPDWSSYEGSCYRVFEQK | Negative |
| Q56EB0 | PPDWSSYEGSCYRVFEQKMN | Negative |
| Q56EB0 | WSSYEGSCYRVFEQKMNWED | Negative |
| Q56EB0 | LVVFLSLSGTAADCPPDWSS | Negative |
| Q56EB0 | PDWSSYEGSCYRVFEQKMNW | Negative |
| Q56EB0 | RFIFVSFGLLVVFLSLSGTA | Negative |
| Q56EB0 | GLLVVFLSLSGTAADCPPDW | Negative |
| Q56EB0 | VFLSLSGTAADCPPDWSSYE | Negative |
| Q56EB1 | LSGTAADCPDWSSHEGHICY | Negative |
| Q56EB1 | GTAADCPDWSSHEGHICYKF | Negative |



|        |                       |          |
|--------|-----------------------|----------|
| Q56EB1 | SFGLLVVFLSLSGTAADCPS  | Negative |
| Q56EB1 | SGTAADCPSDWSSHEGHCHYK | Negative |
| Q56EB1 | SDWSSHEGHCHYKFFQQKMNW | Negative |
| Q56EB1 | LVVFLSLSGTAADCPSDWSS  | Negative |
| Q56EB1 | FLSLSGTAADCPSDWSSHEG  | Negative |
| Q56EB1 | SLSGTAADCPSDWSSHEGHC  | Negative |
| Q56EB1 | FVSFGLLVVFLSLSGTAADC  | Negative |
| Q56EB1 | LSLSGTAADCPSDWSSHEGH  | Negative |
| Q56EB1 | GRFLFVSFGLLVVFLSLSGT  | Negative |
| Q56EB1 | AADCPSDWSSHEGHCHYKFFQ | Negative |
| Q56EB1 | RFLFVSFGLLVVFLSLSGTA  | Negative |
| Q56EB1 | MGRFLFVSFGLLVVFLSLSG  | Negative |
| Q56EB1 | VVFLSLSGTAADCPSDWSSH  | Negative |
| Q56EB1 | DWSSHEGHCHYKFFQQKMNWA | Negative |
| Q56EB1 | PSDWSSHEGHCHYKFFQQKMN | Negative |
| Q56EB1 | WSSHEGHCHYKFFQQKMNWAD | Negative |
| Q56EB1 | VSFGLLVVFLSLSGTAADCP  | Negative |
| Q56EB1 | GLLVVFLSLSGTAADCPSDW  | Negative |
| Q56EB1 | VFLSLSGTAADCPSDWSSHE  | Negative |
| Q56EB1 | DCPSDWSSHEGHCHYKFFQQK | Negative |
| Q56EB1 | ADCPSDWSSHEGHCHYKFFQQ | Negative |
| Q56EB1 | LLVVFLSLSGTAADCPSDWS  | Negative |
| Q56EB1 | FLFVSFGLLVVFLSLSGTAA  | Negative |
| Q56EB1 | CPSDWSSHEGHCHYKFFQQKM | Negative |
| Q56EB1 | SSHEGHCHYKFFQQKMNWADA | Negative |
| Q56EB1 | TAADCPSDWSSHEGHCHYKFF | Negative |
| Q56EB1 | LFVSFGLLVVFLSLSGTAAD  | Negative |
| Q56S59 | PTLVSTHISGLVFCVNGNL   | Negative |
| Q56S59 | LIATPAAFAILVPTLVSTHI  | Negative |
| Q56S59 | KIFLIFLLAALIATPAAFAI  | Negative |
| Q56S59 | LLAALIATPAAFAILVPTLV  | Negative |
| Q56S59 | AFAILVPTLVSTHISGLVFC  | Negative |
| Q56S59 | IATPAAFAILVPTLVSTHIS  | Negative |
| Q56S59 | LIFLLAALIATPAAFAILVP  | Negative |
| Q56S59 | LVPTLVSTHISGLVFCVNG   | Negative |
| Q56S59 | AILVPTLVSTHISGLVFCV   | Negative |
| Q56S59 | ALIATPAAFAILVPTLVSTH  | Negative |
| Q56S59 | LAALIATPAAFAILVPTLV   | Negative |
| Q56S59 | SAKIFLIFLLAALIATPAAF  | Negative |
| Q56S59 | VPTLVSTHISGLVFCVNGN   | Negative |
| Q56S59 | ILVPTLVSTHISGLVFCV    | Negative |
| Q56S59 | TPAAFAILVPTLVSTHISGL  | Negative |
| Q56S59 | TLVSTHISGLVFCVNGNLD   | Negative |
| Q56S59 | AKIFLIFLLAALIATPAAFA  | Negative |
| Q56S59 | IFLIFLLAALIATPAAFAIL  | Negative |
| Q56S59 | FLIFLLAALIATPAAFAILV  | Negative |

|        |                       |          |
|--------|-----------------------|----------|
| Q56S59 | AALIATPAAFAILVPTLVST  | Negative |
| Q56S59 | AAFAILVPTLVSTHISGLVF  | Negative |
| Q56S59 | VSTHISGLVFCSVNGNLDVI  | Negative |
| Q56S59 | ASAKIFLIFLLAALIATPAA  | Negative |
| Q56S59 | FLLAALIATPAAFAILVPTL  | Negative |
| Q56S59 | ATPAAFAILVPTLVSTHISG  | Negative |
| Q56S59 | PAAFAILVPTLVSTHISGLV  | Negative |
| Q56S59 | MASAKIFLIFLLAALIATPA  | Negative |
| Q56S59 | LVSTHISGLVFCSVNGNLDV  | Negative |
| Q56S59 | FAILVPTLVSTHISGLVFCS  | Negative |
| Q56TT9 | ALLMTGVESGRDAYIADNL   | Negative |
| Q56TT9 | VESGRDAYIADNLNCAITCG  | Negative |
| Q56TT9 | YLVVICFALLMTGVESGRD   | Negative |
| Q56TT9 | LMTGVESGRDAYIADNLNCA  | Negative |
| Q56TT9 | ICFALLMTGVESGRDAYIA   | Negative |
| Q56TT9 | SGRDYIADNLNCAITCGSN   | Negative |
| Q56TT9 | YIADNLNCAITCGSNSYCNT  | Negative |
| Q56TT9 | NLNCAITCGSNSYCNTCTK   | Negative |
| Q56TT9 | ESGRDAYIADNLNCAITCGS  | Negative |
| Q56TT9 | ADNLNCAITCGSNSYCNTCT  | Negative |
| Q56TT9 | DNLNCAITCGSNSYCNTCT   | Negative |
| Q56TT9 | LVVICFALLMTGVESGRDA   | Negative |
| Q56TT9 | LNCAITCGSNSYCNTCTKN   | Negative |
| Q56TT9 | MTGVESGRDAYIADNLNCAI  | Negative |
| Q56TT9 | TGVESGRDAYIADNLNCAIT  | Negative |
| Q56TT9 | RDYIADNLNCAITCGSNSY   | Negative |
| Q56TT9 | FALLMTGVESGRDAYIADN   | Negative |
| Q56TT9 | LLMTGVESGRDAYIADNLN   | Negative |
| Q56TT9 | CFALLMTGVESGRDAYIAD   | Negative |
| Q56TT9 | AYIADNLNCAITCGSNSYCN  | Negative |
| Q56TT9 | NCAITCGSNSYCNTCTKNG   | Negative |
| Q56TT9 | NYLVVICFALLMTGVESGR   | Negative |
| Q56TT9 | DAYIADNLNCAITCGSNSYC  | Negative |
| Q56TT9 | VICFALLMTGVESGRDAYI   | Negative |
| Q56TT9 | GRDAYIADNLNCAITCGSNS  | Negative |
| Q56TT9 | LLLMTGVESGRDAYIADNLN  | Negative |
| Q56TT9 | GVESGRDAYIADNLNCAITC  | Negative |
| Q56TT9 | MNYLVVICFALLMTGVESG   | Negative |
| Q56TT9 | IADNLNCAITCGSNSYCNT   | Negative |
| Q57449 | KFKVVTFTVIQDIAQNVAG   | Negative |
| Q57449 | NSFKIMTALALGLFAMQANA  | Negative |
| Q57449 | ANAKFKVVTFTVIQDIAQN   | Negative |
| Q57449 | KVVTFTFTVIQDIAQNVAGNA | Negative |
| Q57449 | QANAKFKVVTFTVIQDIAQ   | Negative |
| Q57449 | FTVIQDIAQNVAGNAATVES  | Negative |
| Q57449 | FKIMTALALGLFAMQANAKF  | Negative |

|        |                        |          |
|--------|------------------------|----------|
| Q57449 | SFKIMTALALGLFAMQANAK   | Negative |
| Q57449 | KIMTALALGLFAMQANAKFK   | Negative |
| Q57449 | MQANAKFKVVTFTFTVIQDIA  | Negative |
| Q57449 | AMQANAKFKVVTFTFTVIQDI  | Negative |
| Q57449 | TALALGLFAMQANAKFKVVT   | Negative |
| Q57449 | RNSFKIMTALALGLFAMQAN   | Negative |
| Q57449 | ALGLFAMQANAKFKVVTFTFT  | Negative |
| Q57449 | MRNSFKIMTALALGLFAMQA   | Negative |
| Q57449 | IMTALALGLFAMQANAKFKV   | Negative |
| Q57449 | FAMQANAKFKVVTFTFTVIQD  | Negative |
| Q57449 | VTTFTFTVIQDIAQNVAGNAAT | Negative |
| Q57449 | AKFKVVTFTFTVIQDIAQNV   | Negative |
| Q57449 | VVTFTFTVIQDIAQNVAGNAA  | Negative |
| Q57449 | GLFAMQANAKFKVVTFTFTVI  | Negative |
| Q57449 | LGLFAMQANAKFKVVTFTFTV  | Negative |
| Q57449 | LALGLFAMQANAKFKVVTFTF  | Negative |
| Q57449 | FKVVTFTFTVIQDIAQNVAGN  | Negative |
| Q57449 | NAKFKVVTFTFTVIQDIAQNV  | Negative |
| Q57449 | TTFTFTVIQDIAQNVAGNAATV | Negative |
| Q57449 | TFTFTVIQDIAQNVAGNAATVE | Negative |
| Q57449 | LFAMQANAKFKVVTFTFTVIQ  | Negative |
| Q57449 | ALALGLFAMQANAKFKVVTT   | Negative |
| Q57483 | ASGYASAEKIAFINAGYIF    | Negative |
| Q57483 | GYASAEKIAFINAGYIFQH    | Negative |
| Q57483 | LALGIALASGYASAEKIAF    | Negative |
| Q57483 | ASAEKIAFINAGYIFQHHP    | Negative |
| Q57483 | KVTALALGIALASGYASAE    | Negative |
| Q57483 | SGYASAEKIAFINAGYIFQ    | Negative |
| Q57483 | ALGIALASGYASAEKIAFI    | Negative |
| Q57483 | AKVTALALGIALASGYASAE   | Negative |
| Q57483 | LASGYASAEKIAFINAGYI    | Negative |
| Q57483 | GIALASGYASAEKIAFINA    | Negative |
| Q57483 | AEEKIAFINAGYIFQHHPDR   | Negative |
| Q57483 | SAEEKIAFINAGYIFQHHPD   | Negative |
| Q57483 | IAKVTALALGIALASGYASA   | Negative |
| Q57483 | FINAGYIFQHHPDRQAVADK   | Negative |
| Q57483 | YASAEKIAFINAGYIFQHH    | Negative |
| Q57483 | KNIAKVTALALGIALASGYA   | Negative |
| Q57483 | IALASGYASAEKIAFINAG    | Negative |
| Q57483 | KIAFINAGYIFQHHPDRQAV   | Negative |
| Q57483 | LGIALASGYASAEKIAFIN    | Negative |
| Q57483 | INAGYIFQHHPDRQAVADKL   | Negative |
| Q57483 | NIKVTALALGIALASGYAS    | Negative |
| Q57483 | MKNIAKVTALALGIALASGY   | Negative |
| Q57483 | ALASGYASAEKIAFINAGY    | Negative |
| Q57483 | EKIAFINAGYIFQHHPDRQA   | Negative |

|        |                      |          |
|--------|----------------------|----------|
| Q57483 | TALALGIALASGYASAEKI  | Negative |
| Q57483 | EEKIAFINAGYIFQHHPDRQ | Negative |
| Q57483 | VTALALGIALASGYASAEK  | Negative |
| Q57483 | IAFINAGYIFQHHPDRQAVA | Negative |
| Q57483 | AFINAGYIFQHHPDRQAVAD | Negative |
| Q58232 | IAVGGAMVATALASGVAAEV | Negative |
| Q58232 | VGGAMVATALASGVAAEVT  | Negative |
| Q58232 | AEVTTSGFSDYKELKDILVK | Negative |
| Q58232 | LASGVAAEVTTSGFSDYKEL | Negative |
| Q58232 | ATALASGVAAEVTTSGFSDY | Negative |
| Q58232 | SLKKIGIAVGGAMVATALA  | Negative |
| Q58232 | IGAIAVGGAMVATALASGVA | Negative |
| Q58232 | AMSLKKIGIAVGGAMVATA  | Negative |
| Q58232 | VTTSGFSDYKELKDILVKDG | Negative |
| Q58232 | GAIAVGGAMVATALASGVAA | Negative |
| Q58232 | AAEVTTSGFSDYKELKDILV | Negative |
| Q58232 | MVATALASGVAAEVTTSGF  | Negative |
| Q58232 | AVGGAMVATALASGVAAEVT | Negative |
| Q58232 | ALASGVAAEVTTSGFSDYKE | Negative |
| Q58232 | AMVATALASGVAAEVTTSGF | Negative |
| Q58232 | KKIGIAVGGAMVATALASG  | Negative |
| Q58232 | ASGVAAEVTTSGFSDYKELK | Negative |
| Q58232 | MSLKKIGIAVGGAMVATAL  | Negative |
| Q58232 | MAMSLKKIGIAVGGAMVAT  | Negative |
| Q58232 | VAAEVTTSGFSDYKELKDIL | Negative |
| Q58232 | SGVAAEVTTSGFSDYKELKD | Negative |
| Q58232 | GAMVATALASGVAAEVTTSG | Negative |
| Q58232 | EVTTSGFSDYKELKDILVKD | Negative |
| Q58232 | KIGIAVGGAMVATALASGV  | Negative |
| Q58232 | TALASGVAAEVTTSGFSDYK | Negative |
| Q58232 | GVAAEVTTSGFSDYKELKDI | Negative |
| Q58232 | VATALASGVAAEVTTSGFSD | Negative |
| Q58232 | AIAVGGAMVATALASGVAAE | Negative |
| Q58232 | LKKIGIAVGGAMVATALAS  | Negative |
| Q588Z1 | TVAETAPQSGHAVPADQLDG | Negative |
| Q588Z1 | GGAVFSAATLIAFGSVVHAS | Negative |
| Q588Z1 | FSAATLIAFGSVVHASGTVA | Negative |
| Q588Z1 | LIAFGSVVHASGTVAETAPQ | Negative |
| Q588Z1 | ATLIAFGSVVHASGTVAETA | Negative |
| Q588Z1 | HASGTVAETAPQSGHAVPAD | Negative |
| Q588Z1 | VAETAPQSGHAVPADQLDGE | Negative |
| Q588Z1 | SHAWGGAVFSAATLIAFGSV | Negative |
| Q588Z1 | HAWGGAVFSAATLIAFGSVV | Negative |
| Q588Z1 | SVVHASGTVAETAPQSGHAV | Negative |
| Q588Z1 | GSVVHASGTVAETAPQSGHA | Negative |
| Q588Z1 | VHASGTVAETAPQSGHAVPA | Negative |

|        |                      |          |
|--------|----------------------|----------|
| Q588Z1 | AVFSAATLIAFGSVVHASGT | Negative |
| Q588Z1 | WGGAVFSAATLIAFGSVVHA | Negative |
| Q588Z1 | VVHASGTVAETAPQSGHAVP | Negative |
| Q588Z1 | GTVAETAPQSGHAVPADQLD | Negative |
| Q588Z1 | SAATLIAFGSVVHASGTVAE | Negative |
| Q588Z1 | SGTVAETAPQSGHAVPADQL | Negative |
| Q588Z1 | AWGGAVFSAATLIAFGSVVH | Negative |
| Q588Z1 | VFSAATLIAFGSVVHASGTV | Negative |
| Q588Z1 | AATLIAFGSVVHASGTVAET | Negative |
| Q588Z1 | AETAPQSGHAVPADQLDGET | Negative |
| Q588Z1 | ASGTVAETAPQSGHAVPADQ | Negative |
| Q588Z1 | IAFGSVVHASGTVAETAPQS | Negative |
| Q588Z1 | GAVFSAATLIAFGSVVHASG | Negative |
| Q588Z1 | FGSVVHASGTVAETAPQSGH | Negative |
| Q588Z1 | GSHAWGGAVFSAATLIAFGS | Negative |
| Q588Z1 | MGSHAWGGAVFSAATLIAFG | Negative |
| Q588Z1 | TLIAFGSVVHASGTVAETAP | Negative |
| Q588Z2 | TLSSTAQAKSEWACPEGFTP | Negative |
| Q588Z2 | LSSTAQAKSEWACPEGFTPK | Negative |
| Q588Z2 | YLAGCLAMVAATLSSTAQAK | Negative |
| Q588Z2 | ATLSSTAQAKSEWACPEGFT | Negative |
| Q588Z2 | AMVAATLSSTAQAKSEWACP | Negative |
| Q588Z2 | FCYLAGCLAMVAATLSSTAQ | Negative |
| Q588Z2 | SRSSRSFCYLAGCLAMVAAT | Negative |
| Q588Z2 | VKSRSSRSFCYLAGCLAMVA | Negative |
| Q588Z2 | MVAATLSSTAQAKSEWACPE | Negative |
| Q588Z2 | AGCLAMVAATLSSTAQAKSE | Negative |
| Q588Z2 | RSFCYLAGCLAMVAATLSST | Negative |
| Q588Z2 | CYLAGCLAMVAATLSSTAQA | Negative |
| Q588Z2 | LAMVAATLSSTAQAKSEWAC | Negative |
| Q588Z2 | GCLAMVAATLSSTAQAKSEW | Negative |
| Q588Z2 | PVVKSRSRSFCYLAGCLAM  | Negative |
| Q588Z2 | KSRSSRSFCYLAGCLAMVAA | Negative |
| Q588Z2 | VVKSRSRSFCYLAGCLAMV  | Negative |
| Q588Z2 | FKPVVKSRSRSFCYLAGCL  | Negative |
| Q588Z2 | MFKPVVKSRSRSFCYLAGC  | Negative |
| Q588Z2 | SSTAQAKSEWACPEGFTPKA | Negative |
| Q588Z2 | KPVVKSRSRSFCYLAGCLA  | Negative |
| Q588Z2 | RSSRSFCYLAGCLAMVAATL | Negative |
| Q588Z2 | LAGCLAMVAATLSSTAQAKS | Negative |
| Q588Z2 | SFCYLAGCLAMVAATLSSTA | Negative |
| Q588Z2 | SRSFCYLAGCLAMVAATLSS | Negative |
| Q588Z2 | VAATLSSTAQAKSEWACPEG | Negative |
| Q588Z2 | STAQAKSEWACPEGFTPKAG | Negative |
| Q588Z2 | SSRSFCYLAGCLAMVAATLS | Negative |
| Q588Z2 | AATLSSTAQAKSEWACPEGF | Negative |

|        |                      |          |
|--------|----------------------|----------|
| Q589G4 | MMLLVLSISAILQVSHSVSF | Negative |
| Q589G4 | PGPCTQYVIRYAFQPSISAC | Negative |
| Q589G4 | SAILQVSHSVSFCLLPVPG  | Negative |
| Q589G4 | MLLVLSISAILQVSHSVSFC | Negative |
| Q589G4 | ILQVSHSVSFCLLPVPGPC  | Negative |
| Q589G4 | LLPIVPGPCTQYVIRYAFQP | Negative |
| Q589G4 | AILQVSHSVSFCLLPVPGP  | Negative |
| Q589G4 | PCTQYVIRYAFQPSISACRR | Negative |
| Q589G4 | PIVPGPCTQYVIRYAFQPSI | Negative |
| Q589G4 | QVSHSVSFCLLPVPGPCTQ  | Negative |
| Q589G4 | HSVSFCLLPVPGPCTQYVI  | Negative |
| Q589G4 | LQVSHSVSFCLLPVPGPCT  | Negative |
| Q589G4 | VSFCLLPVPGPCTQYVIRY  | Negative |
| Q589G4 | LSISAILQVSHSVSFCLLP  | Negative |
| Q589G4 | VLSISAILQVSHSVSFCLLP | Negative |
| Q589G4 | CLLPVPGPCTQYVIRYAFQ  | Negative |
| Q589G4 | SVSFCLLPVPGPCTQYVIR  | Negative |
| Q589G4 | CTQYVIRYAFQPSISACRRF | Negative |
| Q589G4 | VPGPCTQYVIRYAFQPSISA | Negative |
| Q589G4 | GPCTQYVIRYAFQPSISACR | Negative |
| Q589G4 | LVLISAILQVSHSVSFCLL  | Negative |
| Q589G4 | SHSVSFCLLPVPGPCTQYV  | Negative |
| Q589G4 | SISAILQVSHSVSFCLLPV  | Negative |
| Q589G4 | ISAILQVSHSVSFCLLPVP  | Negative |
| Q589G4 | SFCLLPVPGPCTQYVIRYA  | Negative |
| Q589G4 | IVPGPCTQYVIRYAFQPSIS | Negative |
| Q589G4 | FCLLPVPGPCTQYVIRYAF  | Negative |
| Q589G4 | LPIVPGPCTQYVIRYAFQPS | Negative |
| Q589G4 | VSHSVSFCLLPVPGPCTQY  | Negative |
| Q58AD3 | VGAFAAVSLSAAAVDMSNV  | Negative |
| Q58AD3 | AVDMSNVVKTYDLQDGSKVH | Negative |
| Q58AD3 | FIAAVSLSAAAVDMSNVVKT | Negative |
| Q58AD3 | GAFIAAVSLSAAAVDMSNVV | Negative |
| Q58AD3 | QKLMVGAFIAAVSLSAAAVD | Negative |
| Q58AD3 | SAAAVDMSNVVKTYDLQDGS | Negative |
| Q58AD3 | AAVSLSAAAVDMSNVVKTYD | Negative |
| Q58AD3 | VKTYDLQDGSKVHVFKDGKM | Negative |
| Q58AD3 | YDLQDGSKVHVFKDGKMGME | Negative |
| Q58AD3 | KLMVGAFIAAVSLSAAAVDM | Negative |
| Q58AD3 | NVVKTYDLQDGSKVHVFKDG | Negative |
| Q58AD3 | TYDLQDGSKVHVFKDGKMG  | Negative |
| Q58AD3 | MKQKLMVGAFIAAVSLSAAA | Negative |
| Q58AD3 | AFIAAVSLSAAAVDMSNVVK | Negative |
| Q58AD3 | AVSLSAAAVDMSNVVKTYDL | Negative |
| Q58AD3 | VDMSNVVKTYDLQDGSKVHV | Negative |
| Q58AD3 | AAVDMSNVVKTYDLQDGSKV | Negative |

|        |                      |          |
|--------|----------------------|----------|
| Q58AD3 | LSAAAVDMSNVVKTYDLQDG | Negative |
| Q58AD3 | MSNVVKTYDLQDGSKVHVFK | Negative |
| Q58AD3 | SLSAAAVDMSNVVKTYDLQD | Negative |
| Q58AD3 | LMVGAFIAAVSLSAAAVDMS | Negative |
| Q58AD3 | SNVVKTYDLQDGSKVHVFKD | Negative |
| Q58AD3 | VSLSAAAVDMSNVVKTYDLQ | Negative |
| Q58AD3 | KTYDLQDGSKVHVFKDGKMG | Negative |
| Q58AD3 | DMSNVVKTYDLQDGSKVHVF | Negative |
| Q58AD3 | KQKLMVGAFIAAVSLSAAAV | Negative |
| Q58AD3 | AAAVDMSNVVKTYDLQDGSK | Negative |
| Q58AD3 | VVKTYDLQDGSKVHVFKDGK | Negative |
| Q58AD3 | IAAVSLSAAAVDMSNVVKTY | Negative |
| Q59289 | TRKDFDHINLEYSGLEKVNK | Negative |
| Q59289 | KRIIVFAVIALSSGNILAQS | Negative |
| Q59289 | LSSGNILAQSSSITRKDFDH | Negative |
| Q59289 | RIIVFAVIALSSGNILAQSS | Negative |
| Q59289 | IFKRIIVFAVIALSSGNILA | Negative |
| Q59289 | FAVIALSSGNILAQSSSITR | Negative |
| Q59289 | ILAQSSSITRKDFDHINLEY | Negative |
| Q59289 | SITRKDFDHINLEYSGLEKV | Negative |
| Q59289 | SSITRKDFDHINLEYSGLEK | Negative |
| Q59289 | IIVFAVIALSSGNILAQSSS | Negative |
| Q59289 | GNILAQSSSITRKDFDHINL | Negative |
| Q59289 | TKIFKRIIVFAVIALSSGNI | Negative |
| Q59289 | VIALSSGNILAQSSSITRKD | Negative |
| Q59289 | IALSSGNILAQSSSITRKDF | Negative |
| Q59289 | MTTKIFKRIIVFAVIALSSG | Negative |
| Q59289 | KIFKRIIVFAVIALSSGNIL | Negative |
| Q59289 | SSSITRKDFDHINLEYSGLE | Negative |
| Q59289 | ITRKDFDHINLEYSGLEKVN | Negative |
| Q59289 | FKRIIVFAVIALSSGNILAQ | Negative |
| Q59289 | TTKIFKRIIVFAVIALSSGN | Negative |
| Q59289 | NILAQSSSITRKDFDHINLE | Negative |
| Q59289 | QSSSITRKDFDHINLEYSGL | Negative |
| Q59289 | SGNILAQSSSITRKDFDHIN | Negative |
| Q59289 | LAQSSSITRKDFDHINLEYS | Negative |
| Q59289 | AQSSSITRKDFDHINLEYSG | Negative |
| Q59289 | VFAVIALSSGNILAQSSSIT | Negative |
| Q59289 | SSGNILAQSSSITRKDFDHI | Negative |
| Q59289 | AVIALSSGNILAQSSSITRK | Negative |
| Q59289 | ALSSGNILAQSSSITRKDFD | Negative |
| Q59478 | PSRAAVPAPGDKFELSGWSL | Negative |
| Q59478 | KFELSGWSLSVPVDSNDGK  | Negative |
| Q59478 | SVPSRAAVPAPGDKFELSGW | Negative |
| Q59478 | APGDKFELSGWSLSVPVDS  | Negative |
| Q59478 | ASLCLFSVPSRAAVPAPGDK | Negative |

|        |                      |          |
|--------|----------------------|----------|
| Q59478 | MLKSGVMVASLCLFSVPSRA | Negative |
| Q59478 | LCLFSVPSRAAVPAPGDKFE | Negative |
| Q59478 | GVMVASLCLFSVPSRAAVPA | Negative |
| Q59478 | PAPGDKFELSGWSLSVPVDS | Negative |
| Q59478 | LFSVPSRAAVPAPGDKFELS | Negative |
| Q59478 | GDKFELSGWSLSVPVDSND  | Negative |
| Q59478 | PGDKFELSGWSLSVPVDSN  | Negative |
| Q59478 | ELSGWSLSVPVDSNDGKAD  | Negative |
| Q59478 | FSVPSRAAVPAPGDKFELSG | Negative |
| Q59478 | VPAPGDKFELSGWSLSVPVD | Negative |
| Q59478 | AAVPAPGDKFELSGWSLSVP | Negative |
| Q59478 | LKSGVMVASLCLFSVPSRAA | Negative |
| Q59478 | AVPAPGDKFELSGWSLSVPV | Negative |
| Q59478 | CLFSVPSRAAVPAPGDKFEL | Negative |
| Q59478 | SRAAVPAPGDKFELSGWSLS | Negative |
| Q59478 | DKFELSGWSLSVPVDSNDG  | Negative |
| Q59478 | MVASLCLFSVPSRAAVPAPG | Negative |
| Q59478 | VPSRAAVPAPGDKFELSGWS | Negative |
| Q59478 | FELSGWSLSVPVDSNDGKA  | Negative |
| Q59478 | SLCLFSVPSRAAVPAPGDKF | Negative |
| Q59478 | RAAVPAPGDKFELSGWSLSV | Negative |
| Q59478 | KSGVMVASLCLFSVPSRAAV | Negative |
| Q59478 | VASLCLFSVPSRAAVPAPGD | Negative |
| Q59478 | SGVMVASLCLFSVPSRAAVP | Negative |
| Q59544 | VYMPEKVSDGVTVAQLAEQH | Negative |
| Q59544 | EKVSDGVTVAQLAEQHAIHW | Negative |
| Q59544 | KVSDGVTVAQLAEQHAIHWI | Negative |
| Q59544 | TLSALALALSLNSVADAKVY | Negative |
| Q59544 | LALALSLNSVADAKVYMPEK | Negative |
| Q59544 | TLTLSALALALSLNSVADAK | Negative |
| Q59544 | LSALALALSLNSVADAKVYM | Negative |
| Q59544 | ADAKVYMPEKVSDGVTVAQL | Negative |
| Q59544 | SLNSVADAKVYMPEKVSDGV | Negative |
| Q59544 | KLTLTLSALALALSLNSVAD | Negative |
| Q59544 | PEKVSDGVTVAQLAEQHAIH | Negative |
| Q59544 | LTLTLSALALALSLNSVADA | Negative |
| Q59544 | LALSLNSVADAKVYMPEKVS | Negative |
| Q59544 | LSLNSVADAKVYMPEKVSDG | Negative |
| Q59544 | NSVADAKVYMPEKVSDGVTV | Negative |
| Q59544 | LNSVADAKVYMPEKVSDGVT | Negative |
| Q59544 | MRKLTLTLSALALALSLNSV | Negative |
| Q59544 | ALALALSLNSVADAKVYMPE | Negative |
| Q59544 | RKLTLTLSALALALSLNSVA | Negative |
| Q59544 | ALALSLNSVADAKVYMPEKV | Negative |
| Q59544 | KVYMPEKVSDGVTVAQLAEQ | Negative |
| Q59544 | LTLALALALSLNSVADAKV  | Negative |



|        |                      |          |
|--------|----------------------|----------|
| Q59544 | SVADAKVYMPEKVSDGVTVA | Negative |
| Q59544 | DAKVYMPEKVSDGVTVAQLA | Negative |
| Q59544 | YMPEKVSDGVTVAQLAEQHA | Negative |
| Q59544 | MPEKVSDGVTVAQLAEQHAI | Negative |
| Q59544 | VADAKVYMPEKVSDGVTVAQ | Negative |
| Q59544 | ALSLNSVADAKVYMPEKVSD | Negative |
| Q59544 | AKVYMPEKVSDGVTVAQLAE | Negative |
| Q59639 | LSATATAGSFNDISWTLNE  | Negative |
| Q59639 | ISCKSIIVSSLLALSATATA | Negative |
| Q59639 | ISWTLNEDNLPETDASGCA  | Negative |
| Q59639 | IVSSLLALSATATAGSFNDI | Negative |
| Q59639 | ATATAGSFNDISWTLNEDN  | Negative |
| Q59639 | LLALSATATAGSFNDISWTL | Negative |
| Q59639 | SIIVSSLLALSATATAGSFN | Negative |
| Q59639 | GSFNDISWTLNEDNLPETD  | Negative |
| Q59639 | TAGSFNDISWTLNEDNLP   | Negative |
| Q59639 | SSLLALSATATAGSFNDISW | Negative |
| Q59639 | FNDISWTLNEDNLPETDAS  | Negative |
| Q59639 | SLLALSATATAGSFNDISWT | Negative |
| Q59639 | LALSATATAGSFNDISWTL  | Negative |
| Q59639 | AGSFNDISWTLNEDNLPET  | Negative |
| Q59639 | KIISCKSIIVSSLLALSATA | Negative |
| Q59639 | VSSLLALSATATAGSFNDIS | Negative |
| Q59639 | DISWTLNEDNLPETDASGC  | Negative |
| Q59639 | NDISWTLNEDNLPETDASG  | Negative |
| Q59639 | ALSATATAGSFNDISWTLEN | Negative |
| Q59639 | SFNDISWTLNEDNLPETDA  | Negative |
| Q59639 | SWTLNEDNLPETDASGCAL  | Negative |
| Q59639 | SATATAGSFNDISWTLNED  | Negative |
| Q59639 | MKIISCKSIIVSSLLALSAT | Negative |
| Q59639 | TATAGSFNDISWTLNEDNL  | Negative |
| Q59639 | SCKSIIVSSLLALSATATAG | Negative |
| Q59639 | ATAGSFNDISWTLNEDNLP  | Negative |
| Q59639 | CKSIIVSSLLALSATATAGS | Negative |
| Q59639 | KSIIVSSLLALSATATAGSF | Negative |
| Q59639 | IISCKSIIVSSLLALSATAT | Negative |
| Q59XX2 | LFKSFVTFTVLANALAAPLA | Negative |
| Q59XX2 | AAPLAHQHHQHKEEKRAVHV | Negative |
| Q59XX2 | LAAPLAHQHHQHKEEKRAVH | Negative |
| Q59XX2 | PLAQHHQHKEEKRAVHVVT  | Negative |
| Q59XX2 | HHQHKEEKRAVHVVTNTNVV | Negative |
| Q59XX2 | AHQHHQHKEEKRAVHVVTNT | Negative |
| Q59XX2 | QHKEEKRAVHVVTNTNVVVV | Negative |
| Q59XX2 | HQHHQHKEEKRAVHVVTNTN | Negative |
| Q59XX2 | EEKRAVHVVTNTNVVVVTIG | Negative |
| Q59XX2 | KSFVTFTVLANALAAPLAHQ | Negative |

|        |                      |          |
|--------|----------------------|----------|
| Q59XX2 | LANALAAPLAHQHHQHKEEK | Negative |
| Q59XX2 | NALAAPLAHQHHQHKEEKRA | Negative |
| Q59XX2 | TFTVLANALAAPLAHQHHQH | Negative |
| Q59XX2 | ALAAPLAHQHHQHKEEKRAV | Negative |
| Q59XX2 | ANALAAPLAHQHHQHKEEKR | Negative |
| Q59XX2 | VLANALAAPLAHQHHQHKEE | Negative |
| Q59XX2 | EKRAVHVVTNTNVVVVTIGN | Negative |
| Q59XX2 | SFVTFTVLANALAAPLAHQH | Negative |
| Q59XX2 | FKSFVTFTVLANALAAPLAH | Negative |
| Q59XX2 | TVLANALAAPLAHQHHQHKE | Negative |
| Q59XX2 | KEEKRAVHVVTNTNVVVVTI | Negative |
| Q59XX2 | HQHKEEKRAVHVVTNTNVVV | Negative |
| Q59XX2 | MLFKSFVTFTVLANALAPL  | Negative |
| Q59XX2 | VTFTVLANALAAPLAHQHHQ | Negative |
| Q59XX2 | FTVLANALAAPLAHQHHQHK | Negative |
| Q59XX2 | HKEEKRAVHVVTNTNVVVVT | Negative |
| Q59XX2 | QHHQHKEEKRAVHVVTNTNV | Negative |
| Q59XX2 | LAHQHHQHKEEKRAVHVVT  | Negative |
| Q59XX2 | FVTFTVLANALAAPLAHQHH | Negative |
| Q59Y31 | LVDNQQVAVVDLDTGVCPFT | Negative |
| Q59Y31 | ACLVDNQQVAVVDLDTGVCP | Negative |
| Q59Y31 | SALFAATTTLAQDVACLVDN | Negative |
| Q59Y31 | ATTTLAQDVACLVDNQQVAV | Negative |
| Q59Y31 | ASALFAATTTLAQDVACLVD | Negative |
| Q59Y31 | VACLVDNQQVAVVDLDTGVC | Negative |
| Q59Y31 | STIFAAASALFAATTTLAQD | Negative |
| Q59Y31 | TIFAAASALFAATTTLAQDV | Negative |
| Q59Y31 | KVSTIFAAASALFAATTTLA | Negative |
| Q59Y31 | AASALFAATTTLAQDVACLV | Negative |
| Q59Y31 | CLVDNQQVAVVDLDTGVCPF | Negative |
| Q59Y31 | ALFAATTTLAQDVACLVDNQ | Negative |
| Q59Y31 | VSTIFAAASALFAATTTLAQ | Negative |
| Q59Y31 | FAATTTLAQDVACLVDNQQV | Negative |
| Q59Y31 | AATTTLAQDVACLVDNQQVA | Negative |
| Q59Y31 | LFAATTTLAQDVACLVDNQQ | Negative |
| Q59Y31 | NQQVAVVDLDTGVCPFTIPA | Negative |
| Q59Y31 | DNQQVAVVDLDTGVCPFTIP | Negative |
| Q59Y31 | QDVACLVDNQQVAVVDLDTG | Negative |
| Q59Y31 | MKVSTIFAAASALFAATTTL | Negative |
| Q59Y31 | VDNQQVAVVDLDTGVCPFTI | Negative |
| Q59Y31 | AAASALFAATTTLAQDVACL | Negative |
| Q59Y31 | IFAAASALFAATTTLAQDVA | Negative |
| Q59Y31 | LAQDVACLVDNQQVAVVDLD | Negative |
| Q59Y31 | TTLAQDVACLVDNQQVAVVD | Negative |
| Q59Y31 | TTTLAQDVACLVDNQQVAVV | Negative |
| Q59Y31 | DVACLVDNQQVAVVDLDTGV | Negative |

|        |                      |          |
|--------|----------------------|----------|
| Q59Y31 | AQDVACLVDNQQVAVVDLDT | Negative |
| Q59Y31 | TLAQDVACLVDNQQVAVVDL | Negative |
| Q5AMT2 | LTSVAAMGDLAFNLGVKNDD | Negative |
| Q5AMT2 | QIKFLTTLATVLTSAAMGD  | Negative |
| Q5AMT2 | FNLGVKNDGDTCKDVSTFEG | Negative |
| Q5AMT2 | SVAAMGDLAFNLGVKNDDGT | Negative |
| Q5AMT2 | GVKNDDGTCKDVSTFEGDLD | Negative |
| Q5AMT2 | LTTLATVLTSAAMGDLAFN  | Negative |
| Q5AMT2 | LATVLTSAAMGDLAFNLGV  | Negative |
| Q5AMT2 | NDDGTCKDVSTFEGDLDFLK | Negative |
| Q5AMT2 | MQIKFLTTLATVLTSAAMG  | Negative |
| Q5AMT2 | IKFLTTLATVLTSAAMGDL  | Negative |
| Q5AMT2 | NLGVKNDGDTCKDVSTFEGD | Negative |
| Q5AMT2 | GDLAFNLGVKNDDGTCKDVS | Negative |
| Q5AMT2 | ATVLTSAAMGDLAFNLGVK  | Negative |
| Q5AMT2 | TVLTSAAMGDLAFNLGVKN  | Negative |
| Q5AMT2 | FLTTLATVLTSAAMGDLAF  | Negative |
| Q5AMT2 | DLAFNLGVKNDDGTCKDVST | Negative |
| Q5AMT2 | VKNDDGTCKDVSTFEGDLDF | Negative |
| Q5AMT2 | LGVKNDDGTCKDVSTFEGDL | Negative |
| Q5AMT2 | AAMGDLAFNLGVKNDDGTCK | Negative |
| Q5AMT2 | VAAMGDLAFNLGVKNDDGTC | Negative |
| Q5AMT2 | TTLATVLTSAAMGDLAFNL  | Negative |
| Q5AMT2 | TSVAAMGDLAFNLGVKNDDG | Negative |
| Q5AMT2 | AFNLGVKNDDGTCKDVSTFE | Negative |
| Q5AMT2 | VLTSVAAMGDLAFNLGVKND | Negative |
| Q5AMT2 | MGDLAFNLGVKNDDGTCKDV | Negative |
| Q5AMT2 | TLATVLTSAAMGDLAFNLG  | Negative |
| Q5AMT2 | LAFNLGVKNDDGTCKDVSTF | Negative |
| Q5AMT2 | KNDDGTCKDVSTFEGDLDFL | Negative |
| Q5AMT2 | AMGDLAFNLGVKNDDGTCKD | Negative |
| Q5D231 | VVICLVIMAITFAEKCGDQE | Negative |
| Q5D231 | CLVIMAITFAEKCGDQECGE | Negative |
| Q5D231 | KFVVVICLVIMAITFAEKCG | Negative |
| Q5D231 | VVICLVIMAITFAEKCGDQ  | Negative |
| Q5D231 | FAEKCGDQECGEGTCCLDYS | Negative |
| Q5D231 | MAITFAEKCGDQECGEGTCC | Negative |
| Q5D231 | VICLVIMAITFAEKCGDQEC | Negative |
| Q5D231 | AEKCGDQECGEGTCCLDYSQ | Negative |
| Q5D231 | EGTCCLDYSQQHCSRGLKLY | Negative |
| Q5D231 | IMAITFAEKCGDQECGEGTC | Negative |
| Q5D231 | ITFAEKCGDQECGEGTCCLD | Negative |
| Q5D231 | KCGDQECGEGTCCLDYSQQH | Negative |
| Q5D231 | DQECGEGTCCLDYSQQHCSR | Negative |
| Q5D231 | EKCGDQECGEGTCCLDYSQQ | Negative |
| Q5D231 | CGEGTCCLDYSQQHCSRGLK | Negative |

|        |                       |          |
|--------|-----------------------|----------|
| Q5D231 | VIMAITFAEKCGDQECGEGT  | Negative |
| Q5D231 | LKFVVVICLVIMAITFAEKC  | Negative |
| Q5D231 | AITFAEKCGDQECGEGTCCL  | Negative |
| Q5D231 | TCCLDYSQQHCSRLGKLYDM  | Negative |
| Q5D231 | ICLVIMAITFAEKCGDQECG  | Negative |
| Q5D231 | TFAEKCGDQECGEGTCCLDY  | Negative |
| Q5D231 | QECGEGTCCLDYSQQHCSRL  | Negative |
| Q5D231 | CGDQECGEGTCCLDYSQQHC  | Negative |
| Q5D231 | GTCCLDYSQQHCSRLGKLYD  | Negative |
| Q5D231 | LVIMAITFAEKCGDQECGEG  | Negative |
| Q5D231 | GEGTCCLDYSQQHCSRLGKL  | Negative |
| Q5D231 | GDQECGEGTCCLDYSQQHCS  | Negative |
| Q5D231 | ECGEGTCCLDYSQQHCSRLG  | Negative |
| Q5D231 | MLKFVVVICLVIMAITFAEK  | Negative |
| Q5D710 | LTVVLLGVIVPPCMAGQAL   | Negative |
| Q5D710 | VPPCMAGQALNKLMPKIVSA  | Negative |
| Q5D710 | KLMPKIVSAIIYMVGPQNA   | Negative |
| Q5D710 | IVPPCMAGQALNKLMPKIVS  | Negative |
| Q5D710 | VVVLLGVIVPPCMAGQALNK  | Negative |
| Q5D710 | MRSSLLGLTVVLLGVIVP    | Negative |
| Q5D710 | RSSLLGLTVVLLGVIVPP    | Negative |
| Q5D710 | LNKLMPKIVSAIIYMVGPQN  | Negative |
| Q5D710 | VLLGVIVPPCMAGQALNKL   | Negative |
| Q5D710 | GLTVVLLGVIVPPCMAGQA   | Negative |
| Q5D710 | NKLMPKIVSAIIYMVGPNA   | Negative |
| Q5D710 | LLLGLTVVLLGVIVPPCMA   | Negative |
| Q5D710 | VVLLGVIVPPCMAGQALNKL  | Negative |
| Q5D710 | SLLGLTVVLLGVIVPPCM    | Negative |
| Q5D710 | CMAGQALNKLMPKIVSAIIY  | Negative |
| Q5D710 | PPCMAGQALNKLMPKIVSAI  | Negative |
| Q5D710 | VIVPPCMAGQALNKLMPKIV  | Negative |
| Q5D710 | PCMAGQALNKLMPKIVSAII  | Negative |
| Q5D710 | LGIVIVPPCMAGQALNKLMPK | Negative |
| Q5D710 | LLGVIVPPCMAGQALNKLMP  | Negative |
| Q5D710 | LGLTVVLLGVIVPPCMAGQ   | Negative |
| Q5D710 | ALNKLMPKIVSAIIYMVGPQ  | Negative |
| Q5D710 | SSLLGLTVVLLGVIVPPC    | Negative |
| Q5D710 | MAGQALNKLMPKIVSAIIYM  | Negative |
| Q5D710 | GQALNKLMPKIVSAIIYMV   | Negative |
| Q5D710 | AGQALNKLMPKIVSAIIYMV  | Negative |
| Q5D710 | GVIVPPCMAGQALNKLMPKI  | Negative |
| Q5D710 | LLGLTVVLLGVIVPPCMAG   | Negative |
| Q5D710 | QALNKLMPKIVSAIIYMVGQ  | Negative |
| Q5DT21 | TKQMVDCHYKKLPPGQQR    | Negative |
| Q5DT21 | CAKQTKQMVDCHYKKLPPG   | Negative |
| Q5DT21 | LLALTATMFSIECAKQTKQ   | Negative |

|        |                      |          |
|--------|----------------------|----------|
| Q5DT21 | MFSIECAKQTKQMVDCSHYK | Negative |
| Q5DT21 | RATAIVLLLALTLATMFSIE | Negative |
| Q5DT21 | LTLATMFSIECAKQTKQMVD | Negative |
| Q5DT21 | ATAIVLLLALTLATMFSIEC | Negative |
| Q5DT21 | VLLLALTLATMFSIECAKQT | Negative |
| Q5DT21 | ATMFSIECAKQTKQMVDCSH | Negative |
| Q5DT21 | LLLALTLATMFSIECAKQTK | Negative |
| Q5DT21 | VDCSHYKKLPPGQQRFCCHM | Negative |
| Q5DT21 | QTKQMVDCSHYKKLPPGQQR | Negative |
| Q5DT21 | MRATAIVLLLALTLATMFSI | Negative |
| Q5DT21 | LATMFSIECAKQTKQMVDCS | Negative |
| Q5DT21 | TLATMFSIECAKQTKQMVDC | Negative |
| Q5DT21 | AKQTKQMVDCSHYKKLPPGQ | Negative |
| Q5DT21 | TMFSIECAKQTKQMVDCSHY | Negative |
| Q5DT21 | IECAKQTKQMVDCSHYKKLP | Negative |
| Q5DT21 | TAIVLLLALTLATMFSIECA | Negative |
| Q5DT21 | IVLLLALTLATMFSIECAKQ | Negative |
| Q5DT21 | LALTLATMFSIECAKQTKQM | Negative |
| Q5DT21 | ECAKQTKQMVDCSHYKKLPP | Negative |
| Q5DT21 | ALTLATMFSIECAKQTKQMV | Negative |
| Q5DT21 | FSIECAKQTKQMVDCSHYKK | Negative |
| Q5DT21 | MVDCSHYKKLPPGQQRFCCH | Negative |
| Q5DT21 | QMVDCSHYKKLPPGQQRFC  | Negative |
| Q5DT21 | SIECAKQTKQMVDCSHYKKL | Negative |
| Q5DT21 | KQTKQMVDCSHYKKLPPGQQ | Negative |
| Q5DT21 | KQMVDCSHYKKLPPGQQRFC | Negative |
| Q5DW47 | IVMCQTFTYSHGWTNGKRST | Negative |
| Q5DW47 | YSHGWTNGKRSTSLEELANR | Negative |
| Q5DW47 | VMCQTFTYSHGWTNGKRSTS | Negative |
| Q5DW47 | GWTNGKRSTSLEELANRNAI | Negative |
| Q5DW47 | HGWTNGKRSTSLEELANRNA | Negative |
| Q5DW47 | SLTITIVMCQTFTYSHGWTN | Negative |
| Q5DW47 | TITIVMCQTFTYSHGWTNGK | Negative |
| Q5DW47 | ILSLTITIVMCQTFTYSHGW | Negative |
| Q5DW47 | LTITIVMCQTFTYSHGWTNG | Negative |
| Q5DW47 | SHGWTNGKRSTSLEELANRN | Negative |
| Q5DW47 | CQTFTYSHGWTNGKRSTSLE | Negative |
| Q5DW47 | LSLTITIVMCQTFTYSHGWT | Negative |
| Q5DW47 | TIVMCQTFTYSHGWTNGKRS | Negative |
| Q5DW47 | ITIVMCQTFTYSHGWTNGKR | Negative |
| Q5DW47 | ILILFILSLTITIVMCQTFT | Negative |
| Q5DW47 | TFTYSHGWTNGKRSTSLEEL | Negative |
| Q5DW47 | NSQILILFILSLTITIVMCQ | Negative |
| Q5DW47 | TYSHGWTNGKRSTSLEELAN | Negative |
| Q5DW47 | ILFILSLTITIVMCQTFTYS | Negative |
| Q5DW47 | MVNSQILILFILSLTITIVM | Negative |

|        |                       |          |
|--------|-----------------------|----------|
| Q5DW47 | VNSQILILFILSLTITIVMC  | Negative |
| Q5DW47 | WTNGKRSTSLEELANRNAIQ  | Negative |
| Q5DW47 | LFILSLTITIVMCQTFTYSH  | Negative |
| Q5DW47 | SQILILFILSLTITIVMCQT  | Negative |
| Q5DW47 | MCQTFTYSHGWTNGKRSTSL  | Negative |
| Q5DW47 | FTYSHGWTNGKRSTSLEELA  | Negative |
| Q5DW47 | FILSLTITIVMCQTFTYSHG  | Negative |
| Q5DW47 | QILILFILSLTITIVMCQTF  | Negative |
| Q5DW47 | QTFTYSHGWTNGKRSTSLEE  | Negative |
| Q5ECE3 | DVVIDGACPDMDKAVSKFDMN | Negative |
| Q5ECE3 | FLAILASTAADVVIDGACPD  | Negative |
| Q5ECE3 | GLFLAILASTAADVVIDGAC  | Negative |
| Q5ECE3 | KAVSKFDMNAYQGTWYEIKK  | Negative |
| Q5ECE3 | ADVVIDGACPDMDKAVSKFDM | Negative |
| Q5ECE3 | AADVVIDGACPDMDKAVSKFD | Negative |
| Q5ECE3 | DGACPDMDKAVSKFDMNAYQG | Negative |
| Q5ECE3 | FFGLFLAILASTAADVVIDG  | Negative |
| Q5ECE3 | IDGACPDMDKAVSKFDMNAYQ | Negative |
| Q5ECE3 | STAADVVIDGACPDMDKAVSK | Negative |
| Q5ECE3 | DMKAVSKFDMNAYQGTWYEI  | Negative |
| Q5ECE3 | PDMDKAVSKFDMNAYQGTWYE | Negative |
| Q5ECE3 | CPMDKAVSKFDMNAYQGTWY  | Negative |
| Q5ECE3 | MKAVSKFDMNAYQGTWYEIK  | Negative |
| Q5ECE3 | LAILASTAADVVIDGACPDMD | Negative |
| Q5ECE3 | VSKFDMNAYQGTWYEIKKFP  | Negative |
| Q5ECE3 | GACPDMDKAVSKFDMNAYQGT | Negative |
| Q5ECE3 | FGLFLAILASTAADVVIDGA  | Negative |
| Q5ECE3 | LASTAADVVIDGACPDMDKAV | Negative |
| Q5ECE3 | VIDGACPDMDKAVSKFDMNAY | Negative |
| Q5ECE3 | TAADVVIDGACPDMDKAVSKF | Negative |
| Q5ECE3 | AVSKFDMNAYQGTWYEIKKF  | Negative |
| Q5ECE3 | ACPDMDKAVSKFDMNAYQGTW | Negative |
| Q5ECE3 | ASTAADVVIDGACPDMDKAVS | Negative |
| Q5ECE3 | LFLAILASTAADVVIDGACP  | Negative |
| Q5ECE3 | MKFFGLFLAILASTAADVVI  | Negative |
| Q5ECE3 | AILASTAADVVIDGACPDMDK | Negative |
| Q5ECE3 | ILASTAADVVIDGACPDMDKA | Negative |
| Q5ECE3 | VVIDGACPDMDKAVSKFDMNA | Negative |
| Q5EPH2 | SKGFGCLPQSDCPQEARLSY  | Negative |
| Q5EPH2 | QANECVSKGFGCLPQSDCPQ  | Negative |
| Q5EPH2 | MAATLPVFAVVFFAMVLASS  | Negative |
| Q5EPH2 | KGFGCLPQSDCPQEARLSYG  | Negative |
| Q5EPH2 | VFAVVFFAMVLASSQANECV  | Negative |
| Q5EPH2 | ECVSKGFGCLPQSDCPQEAR  | Negative |
| Q5EPH2 | ASSQANECVSKGFGCLPQSD  | Negative |
| Q5EPH2 | LASSQANECVSKGFGCLPQS  | Negative |

|        |                      |          |
|--------|----------------------|----------|
| Q5EPH2 | ANECVSKGFGCLPQSDCPQE | Negative |
| Q5EPH2 | FGCLPQSDCPQEARLSYGGC | Negative |
| Q5EPH2 | VFFAMVLASSQANECVSKGF | Negative |
| Q5EPH2 | TLPVFVAVFFAMVLASSQAN | Negative |
| Q5EPH2 | VLASSQANECVSKGFGCLPQ | Negative |
| Q5EPH2 | AMVLASSQANECVSKGFGCL | Negative |
| Q5EPH2 | SQANECVSKGFGCLPQSDCP | Negative |
| Q5EPH2 | ATLPVFVAVFFAMVLASSQA | Negative |
| Q5EPH2 | VVFFAMVLASSQANECVSKG | Negative |
| Q5EPH2 | SSQANECVSKGFGCLPQSDC | Negative |
| Q5EPH2 | LPVFVAVFFAMVLASSQANE | Negative |
| Q5EPH2 | AATLPVFVAVFFAMVLASSQ | Negative |
| Q5EPH2 | MVLASSQANECVSKGFGCLP | Negative |
| Q5EPH2 | AVVFFAMVLASSQANECVSK | Negative |
| Q5EPH2 | VSKGFGCLPQSDCPQEARLS | Negative |
| Q5EPH2 | FFAMVLASSQANECVSKGFG | Negative |
| Q5EPH2 | FAMVLASSQANECVSKGFGC | Negative |
| Q5EPH2 | PVFVAVFFAMVLASSQANEC | Negative |
| Q5EPH2 | CVSKGFGCLPQSDCPQEARL | Negative |
| Q5EPH2 | NECVSKGFGCLPQSDCPQEA | Negative |
| Q5EPH2 | GFGCLPQSDCPQEARLSYGG | Negative |
| Q5F0I3 | ECDINFSLAGADGQTYNTFI | Negative |
| Q5F0I3 | LYFGFHIAECDINFSLAGAD | Negative |
| Q5F0I3 | GFHIAECDINFSLAGADGQT | Negative |
| Q5F0I3 | LAGADGQTYNTFIAKLRQEL | Negative |
| Q5F0I3 | SLAGADGQTYNTFIAKLRQE | Negative |
| Q5F0I3 | TVVAILLYFGFHIAECDINF | Negative |
| Q5F0I3 | MRVARFCTVVAILLYFGFHI | Negative |
| Q5F0I3 | YFGFHIAECDINFSLAGADG | Negative |
| Q5F0I3 | RFCTVVAILLYFGFHIAECD | Negative |
| Q5F0I3 | LLYFGFHIAECDINFSLAGA | Negative |
| Q5F0I3 | FCTVVAILLYFGFHIAECDI | Negative |
| Q5F0I3 | CTVVAILLYFGFHIAECDIN | Negative |
| Q5F0I3 | VAILLYFGFHIAECDINFSL | Negative |
| Q5F0I3 | VARFCTVVAILLYFGFHIAE | Negative |
| Q5F0I3 | CDINFSLAGADGQTYNTFIA | Negative |
| Q5F0I3 | RVARFCTVVAILLYFGFHIA | Negative |
| Q5F0I3 | AECDINFSLAGADGQTYNTF | Negative |
| Q5F0I3 | AGADGQTYNTFIAKLRQELS | Negative |
| Q5F0I3 | FGFHIAECDINFSLAGADGQ | Negative |
| Q5F0I3 | ILLYFGFHIAECDINFSLAG | Negative |
| Q5F0I3 | INFSLAGADGQTYNTFIAKL | Negative |
| Q5F0I3 | ARFCTVVAILLYFGFHIAEC | Negative |
| Q5F0I3 | FHIAECDINFSLAGADGQTY | Negative |
| Q5F0I3 | IAECDINFSLAGADGQTYNT | Negative |
| Q5F0I3 | DINFSLAGADGQTYNTFIAK | Negative |

|        |                      |          |
|--------|----------------------|----------|
| Q5F0I3 | NFSLAGADGQTYNTFIAKLR | Negative |
| Q5F0I3 | HIAECDINFSLAGADGQTYN | Negative |
| Q5F0I3 | AILLYFGFHIAECDINFSLA | Negative |
| Q5F0I3 | FSLAGADGQTYNTFIAKLRQ | Negative |
| Q5G8A6 | KHVQKLVALIPNDQLRSILK | Negative |
| Q5G8A6 | MVTLASCGLREKHVQKLVAL | Negative |
| Q5G8A6 | GLREKHVQKLVALIPNDQLR | Negative |
| Q5G8A6 | ERKLALLFLGMVTLASCGL  | Negative |
| Q5G8A6 | RKLALLFLGMVTLASCGLR  | Negative |
| Q5G8A6 | LLLFLGMVTLASCGLREKHV | Negative |
| Q5G8A6 | LLFLGMVTLASCGLREKHVQ | Negative |
| Q5G8A6 | LREKHVQKLVALIPNDQLRS | Negative |
| Q5G8A6 | VALIPNDQLRSILKAVVHKV | Negative |
| Q5G8A6 | REKHVQKLVALIPNDQLRSI | Negative |
| Q5G8A6 | FLGMVTLASCGLREKHVQKL | Negative |
| Q5G8A6 | LGMVTLASCGLREKHVQKLV | Negative |
| Q5G8A6 | LASCGLREKHVQKLVALIPN | Negative |
| Q5G8A6 | VQKLVALIPNDQLRSILKAV | Negative |
| Q5G8A6 | LVALIPNDQLRSILKAVVHK | Negative |
| Q5G8A6 | HVQKLVALIPNDQLRSILKA | Negative |
| Q5G8A6 | CGLREKHVQKLVALIPNDQL | Negative |
| Q5G8A6 | ASCGLREKHVQKLVALIPND | Negative |
| Q5G8A6 | EKHVQKLVALIPNDQLRSIL | Negative |
| Q5G8A6 | KLVALIPNDQLRSILKAVVH | Negative |
| Q5G8A6 | VTLASCGLREKHVQKLVALI | Negative |
| Q5G8A6 | KLALLFLGMVTLASCGLRE  | Negative |
| Q5G8A6 | ALLFLGMVTLASCGLREKH  | Negative |
| Q5G8A6 | SCGLREKHVQKLVALIPNDQ | Negative |
| Q5G8A6 | MERKLALLFLGMVTLASCG  | Negative |
| Q5G8A6 | GMVTLASCGLREKHVQKLVA | Negative |
| Q5G8A6 | LFLGMVTLASCGLREKHVQK | Negative |
| Q5G8A6 | QKLVALIPNDQLRSILKAVV | Negative |
| Q5G8A6 | TLASCGLREKHVQKLVALIP | Negative |
| Q5GQ85 | VVSADDCSGKTDAWTSIKGP | Negative |
| Q5GQ85 | AWTSIKGPKTGGYWLKQTTK | Negative |
| Q5GQ85 | SADDCSGKTDAWTSIKGPKT | Negative |
| Q5GQ85 | SGKTDAWTSIKGPKTGGYWL | Negative |
| Q5GQ85 | GKTDAWTSIKGPKTGGYWLK | Negative |
| Q5GQ85 | CSGKTDAWTSIKGPKTGGYW | Negative |
| Q5GQ85 | ADDCSGKTDAWTSIKGPKTG | Negative |
| Q5GQ85 | VSADDCSGKTDAWTSIKGPK | Negative |
| Q5GQ85 | IILLVACLSVVSADDCSGKT | Negative |
| Q5GQ85 | LVACLSVVSADDCSGKTDW  | Negative |
| Q5GQ85 | LSVVSADDCSGKTDAWTSIK | Negative |
| Q5GQ85 | KTDWTSIKGPKTGGYWLKQ  | Negative |
| Q5GQ85 | ILLVACLSVVSADDCSGKTD | Negative |



|        |                       |          |
|--------|-----------------------|----------|
| Q5GQ85 | DCSGKTDAWTSIKGPKTGGY  | Negative |
| Q5GQ85 | SIKGPKTGGYWLGKQTTKTGE | Negative |
| Q5GQ85 | LLVACLSVVSADDCSGKTD   | Negative |
| Q5GQ85 | DAWTSIKGPKTGGYWLGKQTT | Negative |
| Q5GQ85 | KGPKTGGYWLGKQTTKTGENE | Negative |
| Q5GQ85 | ACLSVVSADDCSGKTDWTS   | Negative |
| Q5GQ85 | TDWTSIKGPKTGGYWLGKQT  | Negative |
| Q5GQ85 | DDCSGKTDWTSIKGPKTGG   | Negative |
| Q5GQ85 | WTSIKGPKTGGYWLGKQTTKT | Negative |
| Q5GQ85 | IKGPKTGGYWLGKQTTKTGEN | Negative |
| Q5GQ85 | VACLSVVSADDCSGKTDWTS  | Negative |
| Q5GQ85 | LIILLVACLSVVSADDCSGK  | Negative |
| Q5GQ85 | CLSVVSADDCSGKTDWTSI   | Negative |
| Q5GQ85 | SVVSADDCSGKTDWTSIKG   | Negative |
| Q5GQ85 | TSIKGPKTGGYWLGKQTTKTG | Negative |
| Q5GQ85 | MALIILLVACLSVVSADDCS  | Negative |
| Q5HEA4 | KKTLLASSLAVGLGIVAGNA  | Negative |
| Q5HEA4 | ADLNKASLAQMAQSNDQTLN  | Negative |
| Q5HEA4 | SEADLNKASLAQMAQSNDQT  | Negative |
| Q5HEA4 | AVGLGIVAGNAGHEAHASEA  | Negative |
| Q5HEA4 | LLASSLAVGLGIVAGNAGHE  | Negative |
| Q5HEA4 | AGHEAHASEADLNKASLAQM  | Negative |
| Q5HEA4 | EAHASEADLNKASLAQMAQS  | Negative |
| Q5HEA4 | LAVGLGIVAGNAGHEAHASE  | Negative |
| Q5HEA4 | ASSLAVGLGIVAGNAGHEAH  | Negative |
| Q5HEA4 | LASSLAVGLGIVAGNAGHEA  | Negative |
| Q5HEA4 | HEAHASEADLNKASLAQMAQ  | Negative |
| Q5HEA4 | AHASEADLNKASLAQMAQSN  | Negative |
| Q5HEA4 | KTLLASSLAVGLGIVAGNAG  | Negative |
| Q5HEA4 | GIVAGNAGHEAHASEADLNK  | Negative |
| Q5HEA4 | HASEADLNKASLAQMAQSND  | Negative |
| Q5HEA4 | LGIVAGNAGHEAHASEADLN  | Negative |
| Q5HEA4 | IVAGNAGHEAHASEADLNKA  | Negative |
| Q5HEA4 | GHEAHASEADLNKASLAQMA  | Negative |
| Q5HEA4 | EADLNKASLAQMAQSNDQTL  | Negative |
| Q5HEA4 | NAGHEAHASEADLNKASLAQ  | Negative |
| Q5HEA4 | SLAVGLGIVAGNAGHEAHAS  | Negative |
| Q5HEA4 | TLLASSLAVGLGIVAGNAGH  | Negative |
| Q5HEA4 | MKKTLLASSLAVGLGIVAGN  | Negative |
| Q5HEA4 | AGNAGHEAHASEADLNKASL  | Negative |
| Q5HEA4 | VGLGIVAGNAGHEAHASEAD  | Negative |
| Q5HEA4 | VAGNAGHEAHASEADLNKAS  | Negative |
| Q5HEA4 | GNAGHEAHASEADLNKASLA  | Negative |
| Q5HEA4 | SSLAVGLGIVAGNAGHEAHA  | Negative |
| Q5HEA4 | ASEADLNKASLAQMAQSNDQ  | Negative |
| Q5I2B2 | VQGRCPSGMCCSQFGYCGRG  | Negative |

|        |                      |          |
|--------|----------------------|----------|
| Q5I2B2 | IVMMAFMMVDPSMGAGECVQ | Negative |
| Q5I2B2 | MAFMMVDPSMGAGECVQGRC | Negative |
| Q5I2B2 | MVDPSMGAGECVQGRCPSGM | Negative |
| Q5I2B2 | MMAFMMVDPSMGAGECVQGR | Negative |
| Q5I2B2 | ALIVIVMMAFMMVDPSMGAG | Negative |
| Q5I2B2 | DPSMGAGECVQGRCPSGMCC | Negative |
| Q5I2B2 | GAGECVQGRCPSGMCCSQFG | Negative |
| Q5I2B2 | SMGAGECVQGRCPSGMCCSQ | Negative |
| Q5I2B2 | ECVQGRCPSGMCCSQFGYCG | Negative |
| Q5I2B2 | IVIVMMAFMMVDPSMGAGEC | Negative |
| Q5I2B2 | FMMVDPSMGAGECVQGRCP  | Negative |
| Q5I2B2 | AGECVQGRCPSGMCCSQFGY | Negative |
| Q5I2B2 | CVQGRCPSGMCCSQFGYCGR | Negative |
| Q5I2B2 | SVALIVIVMMAFMMVDPSMG | Negative |
| Q5I2B2 | GECVQGRCPSGMCCSQFGYC | Negative |
| Q5I2B2 | MVNMKSVALIVIVMMAFMMV | Negative |
| Q5I2B2 | VMMAFMMVDPSMGAGECVQG | Negative |
| Q5I2B2 | LIVIVMMAFMMVDPSMGAGE | Negative |
| Q5I2B2 | NMKSVALIVIVMMAFMMVDP | Negative |
| Q5I2B2 | PSMGAGECVQGRCPSGMCCS | Negative |
| Q5I2B2 | AFMMVDPSMGAGECVQGRCP | Negative |
| Q5I2B2 | MGAGECVQGRCPSGMCCSQF | Negative |
| Q5I2B2 | MMVDPSMGAGECVQGRCPSG | Negative |
| Q5I2B2 | KSVALIVIVMMAFMMVDPSM | Negative |
| Q5I2B2 | MKSVALIVIVMMAFMMVDPS | Negative |
| Q5I2B2 | VNMKSVALIVIVMMAFMMVD | Negative |
| Q5I2B2 | VDPSMGAGECVQGRCPSGMC | Negative |
| Q5I2B2 | VALIVIVMMAFMMVDPSMGA | Negative |
| Q5JIZ5 | KPAVRNVSQQKNYGLLTPGL | Negative |
| Q5JIZ5 | AAPQKPAVRNVSQQKNYGLL | Negative |
| Q5JIZ5 | LFLVGLMAGSVLAAPQKPAV | Negative |
| Q5JIZ5 | GAVVLALFLVGLMAGSVLAA | Negative |
| Q5JIZ5 | VVLALFLVGLMAGSVLAAPQ | Negative |
| Q5JIZ5 | LAAPQKPAVRNVSQQKNYGL | Negative |
| Q5JIZ5 | MAGSVLAAPQKPAVRNVSQQ | Negative |
| Q5JIZ5 | QKPAVRNVSQQKNYGLLTPG | Negative |
| Q5JIZ5 | GSVLAAPQKPAVRNVSQQKN | Negative |
| Q5JIZ5 | FLVGLMAGSVLAAPQKPAVR | Negative |
| Q5JIZ5 | APQKPAVRNVSQQKNYGLLT | Negative |
| Q5JIZ5 | AGSVLAAPQKPAVRNVSQQK | Negative |
| Q5JIZ5 | PAVRNVSQQKNYGLLTPGLF | Negative |
| Q5JIZ5 | LMAGSVLAAPQKPAVRNVSQ | Negative |
| Q5JIZ5 | VGLMAGSVLAAPQKPAVRNV | Negative |
| Q5JIZ5 | VRNVSQQKNYGLLTPGLFKK | Negative |
| Q5JIZ5 | FGAVVLALFLVGLMAGSVLA | Negative |
| Q5JIZ5 | AVRNVSQQKNYGLLTPGLFK | Negative |

|        |                       |          |
|--------|-----------------------|----------|
| Q5JIZ5 | KFGAVVLALFLVGLMAGSVL  | Negative |
| Q5JIZ5 | KKFGAVVLALFLVGLMAGSV  | Negative |
| Q5JIZ5 | VLAAPQKPAVRNVSQQKNYG  | Negative |
| Q5JIZ5 | AVVLALFLVGLMAGSVLAAP  | Negative |
| Q5JIZ5 | ALFLVGLMAGSVLAAPQKPA  | Negative |
| Q5JIZ5 | SVLAAPQKPAVRNVSQQKNY  | Negative |
| Q5JIZ5 | VLALFLVGLMAGSVLAAPQK  | Negative |
| Q5JIZ5 | PQKPAVRNVSQQKNYGLLTP  | Negative |
| Q5JIZ5 | MKKFGAVVLALFLVGLMAGS  | Negative |
| Q5JIZ5 | GLMAGSVLAAPQKPAVRNVS  | Negative |
| Q5JIZ5 | LVGLMAGSVLAAPQKPAVRN  | Negative |
| Q5JNJ5 | AVLGLVAVFSSSEAYVIFYAG | Negative |
| Q5JNJ5 | RRWPYAAWFMAVLGLVAVFS  | Negative |
| Q5JNJ5 | VLGLVAVFSSSEAYVIFYAGG | Negative |
| Q5JNJ5 | SRRWPYAAWFMAVLGLVAVF  | Negative |
| Q5JNJ5 | FSSSEAYVIFYAGGRDGWVVD | Negative |
| Q5JNJ5 | FMAVLGLVAVFSSSEAYVIFY | Negative |
| Q5JNJ5 | AWFMAVLGLVAVFSSSEAYV  | Negative |
| Q5JNJ5 | ASRRWPYAAWFMAVLGLVAV  | Negative |
| Q5JNJ5 | EASRRWPYAAWFMAVLGLVA  | Negative |
| Q5JNJ5 | SEAYVIFYAGGRDGWVVDPAE | Negative |
| Q5JNJ5 | RWPYAAWFMAVLGLVAVFSS  | Negative |
| Q5JNJ5 | PYAAWFMAVLGLVAVFSSSE  | Negative |
| Q5JNJ5 | YAAWFMAVLGLVAVFSSSEA  | Negative |
| Q5JNJ5 | WFMAVLGLVAVFSSSEAYVF  | Negative |
| Q5JNJ5 | WPYAAWFMAVLGLVAVFSSS  | Negative |
| Q5JNJ5 | MEASRRWPYAAWFMAVLGLV  | Negative |
| Q5JNJ5 | LGLVAVFSSSEAYVIFYAGGR | Negative |
| Q5JNJ5 | SSEAYVIFYAGGRDGWVVDPA | Negative |
| Q5JNJ5 | VAVFSSSEAYVIFYAGGRDGW | Negative |
| Q5JNJ5 | AYVIFYAGGRDGWVVDPAESF | Negative |
| Q5JNJ5 | GLVAVFSSSEAYVIFYAGGRD | Negative |
| Q5JNJ5 | SSSEAYVIFYAGGRDGWVVDP | Negative |
| Q5JNJ5 | EAYVIFYAGGRDGWVVDPAES | Negative |
| Q5JNJ5 | VIFYAGGRDGWVVDPAESFNY | Negative |
| Q5JNJ5 | YVIFYAGGRDGWVVDPAESFN | Negative |
| Q5JNJ5 | LVAVFSSSEAYVIFYAGGRDG | Negative |
| Q5JNJ5 | VFSSSEAYVIFYAGGRDGWVV | Negative |
| Q5JNJ5 | AAWFMAVLGLVAVFSSSEAY  | Negative |
| Q5JNJ5 | AVFSSSEAYVIFYAGGRDGWV | Negative |
| Q5K0E0 | QVQTNKKCKGGSCASVCAKE  | Negative |
| Q5K0E0 | TNKKCKGGSCASVCAKEIGV  | Negative |
| Q5K0E0 | SIILLTLLICSMSIFGNGQV  | Negative |
| Q5K0E0 | ICSMSIFGNGQVQTNKKCKG  | Negative |
| Q5K0E0 | SMSIFGNGQVQTNKKCKGGS  | Negative |
| Q5K0E0 | LTLLICSMSIFGNGQVQTNK  | Negative |

|        |                      |          |
|--------|----------------------|----------|
| Q5K0E0 | KFSSIILLTLLICSMSIFGN | Negative |
| Q5K0E0 | VQTNKKCKGGSCASVCAKEI | Negative |
| Q5K0E0 | LLICSMSIFGNGQVQTNKKC | Negative |
| Q5K0E0 | CSMSIFGNGQVQTNKKCKGG | Negative |
| Q5K0E0 | GNGQVQTNKKCKGGSCASVC | Negative |
| Q5K0E0 | IILLTLLICSMSIFGNGQVQ | Negative |
| Q5K0E0 | NGQVQTNKKCKGGSCASVCA | Negative |
| Q5K0E0 | SIFGNGQVQTNKKCKGGSCA | Negative |
| Q5K0E0 | KCKGGSCASVCAKEIGVAAG | Negative |
| Q5K0E0 | SSIILLTLLICSMSIFGNGQ | Negative |
| Q5K0E0 | CKGGSCASVCAKEIGVAAGK | Negative |
| Q5K0E0 | LICSMSIFGNGQVQTNKKCK | Negative |
| Q5K0E0 | IFGNGQVQTNKKCKGGSCAS | Negative |
| Q5K0E0 | MSIFGNGQVQTNKKCKGGSC | Negative |
| Q5K0E0 | TLLICSMSIFGNGQVQTNKK | Negative |
| Q5K0E0 | QTNKKCKGGSCASVCAKEIG | Negative |
| Q5K0E0 | KKCKGGSCASVCAKEIGVAA | Negative |
| Q5K0E0 | MKFSSIILLTLLICSMSIFG | Negative |
| Q5K0E0 | FGNGQVQTNKKCKGGSCASV | Negative |
| Q5K0E0 | NKKCKGGSCASVCAKEIGVA | Negative |
| Q5K0E0 | FSSIILLTLLICSMSIFGNG | Negative |
| Q5K0E0 | ILLTLLICSMSIFGNGQVQT | Negative |
| Q5K0E0 | GQVQTNKKCKGGSCASVCAK | Negative |
| Q5KQS1 | LVALVLLGQIIGSTLSSQVR | Negative |
| Q5KQS1 | GDLECDREAKEWADQAVRY  | Negative |
| Q5KQS1 | LVLLGQIIGSTLSSQVRGDL | Negative |
| Q5KQS1 | ECDDREAKEWADQAVRYINE | Negative |
| Q5KQS1 | TLSSQVRGDLECDREAKEW  | Negative |
| Q5KQS1 | DREAKEWADQAVRYINEHKL | Negative |
| Q5KQS1 | VRGDLECDREAKEWADQAV  | Negative |
| Q5KQS1 | GSTLSSQVRGDLECDREAK  | Negative |
| Q5KQS1 | CDDREAKEWADQAVRYINEH | Negative |
| Q5KQS1 | MHFLVALVLLGQIIGSTLSS | Negative |
| Q5KQS1 | HFLVALVLLGQIIGSTLSSQ | Negative |
| Q5KQS1 | FLVALVLLGQIIGSTLSSQV | Negative |
| Q5KQS1 | RGDLECDREAKEWADQAVR  | Negative |
| Q5KQS1 | STLSSQVRGDLECDREAKE  | Negative |
| Q5KQS1 | IGSTLSSQVRGDLECDREA  | Negative |
| Q5KQS1 | LLGQIIGSTLSSQVRGDLEC | Negative |
| Q5KQS1 | LECDDREAKEWADQAVRYIN | Negative |
| Q5KQS1 | SSQVRGDLECDREAKEWAD  | Negative |
| Q5KQS1 | QVRGDLECDREAKEWADQA  | Negative |
| Q5KQS1 | IIGSTLSSQVRGDLECDRE  | Negative |
| Q5KQS1 | VLLGQIIGSTLSSQVRGDLE | Negative |
| Q5KQS1 | DDREAKEWADQAVRYINEHK | Negative |
| Q5KQS1 | QIIGSTLSSQVRGDLECDR  | Negative |

|        |                       |          |
|--------|-----------------------|----------|
| Q5KQS1 | SQVRGDLECDDEAKEWADQ   | Negative |
| Q5KQS1 | LSSQVRGDLECDDEAKEWA   | Negative |
| Q5KQS1 | ALVLLGQIIGSTLSSQVRGD  | Negative |
| Q5KQS1 | DLECDDEAKEWADQAVRYI   | Negative |
| Q5KQS1 | GQIIGSTLSSQVRGDLECD   | Negative |
| Q5KQS1 | LGQIIGSTLSSQVRGDLECD  | Negative |
| Q5KSB7 | CSRGDAEVVISEWDQVFNA   | Negative |
| Q5KSB7 | CAALASAECCSRGDAEVVIS  | Negative |
| Q5KSB7 | FLSCAALASAECCSRGDAEV  | Negative |
| Q5KSB7 | ECCSRGDAEVVISEWDQVF   | Negative |
| Q5KSB7 | ALASAECCSRGDAEVVISEW  | Negative |
| Q5KSB7 | EVVISEWDQVFNAAMAGSSE  | Negative |
| Q5KSB7 | RGDAEVVISEWDQVFNAAMA  | Negative |
| Q5KSB7 | AALASAECCSRGDAEVVISE  | Negative |
| Q5KSB7 | LSCAALASAECCSRGDAEVV  | Negative |
| Q5KSB7 | SAECCSRGDAEVVISEWDQV  | Negative |
| Q5KSB7 | DAEVVISEWDQVFNAAMAGS  | Negative |
| Q5KSB7 | ILVLFLSCAALASAECCSRG  | Negative |
| Q5KSB7 | SRGDAEVVISEWDQVFNAAM  | Negative |
| Q5KSB7 | LASAECCSRGDAEVVISEWD  | Negative |
| Q5KSB7 | AECCSRGDAEVVISEWDQVF  | Negative |
| Q5KSB7 | MTILVLFLSCAALASAECCS  | Negative |
| Q5KSB7 | AEVVISEWDQVFNAAMAGSS  | Negative |
| Q5KSB7 | ASAECCSRGDAEVVISEWDQ  | Negative |
| Q5KSB7 | GDAEVVISEWDQVFNAAMAG  | Negative |
| Q5KSB7 | ISEWDQVFNAAMAGSSESAV  | Negative |
| Q5KSB7 | SCAALASAECCSRGDAEVVI  | Negative |
| Q5KSB7 | SEWDQVFNAAMAGSSESAVG  | Negative |
| Q5KSB7 | LVLFLSCAALASAECCSRGD  | Negative |
| Q5KSB7 | VLFLSCAALASAECCSRGDA  | Negative |
| Q5KSB7 | LFLSCAALASAECCSRGDAE  | Negative |
| Q5KSB7 | VISEWDQVFNAAMAGSSESA  | Negative |
| Q5KSB7 | VVISEWDQVFNAAMAGSSES  | Negative |
| Q5KSB7 | EWDQVFNAAMAGSSESAVG   | Negative |
| Q5KSB7 | CCSRGDAEVVISEWDQVFNA  | Negative |
| Q5MJP5 | GKFIRHKDESFYECGQLIGY  | Negative |
| Q5MJP5 | FLLFIYFECGDKFIRHKDES  | Negative |
| Q5MJP5 | DESFYECGQLIGYQQYCVDA  | Negative |
| Q5MJP5 | KTIPLLFLFIYFECGDKFI   | Negative |
| Q5MJP5 | TIPLLFLFIYFECGDKFIR   | Negative |
| Q5MJP5 | FECGDKFIRHKDESFYECGQ  | Negative |
| Q5MJP5 | DGKFIRHKDESFYECGQLIG  | Negative |
| Q5MJP5 | MKTIPLLFLFIYFECGDKF   | Negative |
| Q5MJP5 | RHKDESFYECGQLIGYQQYC  | Negative |
| Q5MJP5 | FIRHKDESFYECGQLIGYQQ  | Negative |
| Q5MJP5 | ECDGDKFIRHKDESFYECGQL | Negative |

|        |                      |          |
|--------|----------------------|----------|
| Q5MJP5 | ESFYECGQLIGYQQYCVDAC | Negative |
| Q5MJP5 | LLFIYFECDGKFIRHKDEF  | Negative |
| Q5MJP5 | LFLLLIYFECDGKFIRHKDE | Negative |
| Q5MJP5 | LLFLLFIYFECDGKFIRHKD | Negative |
| Q5MJP5 | IRHKDEFYECGQLIGYQQY  | Negative |
| Q5MJP5 | LFIYFECDGKFIRHKDEFY  | Negative |
| Q5MJP5 | PLLFLFIYFECDGKFIRHK  | Negative |
| Q5MJP5 | SFYECGQLIGYQQYCVDACQ | Negative |
| Q5MJP5 | FYECGQLIGYQQYCVDACQA | Negative |
| Q5MJP5 | IYFECDGKFIRHKDEFYEC  | Negative |
| Q5MJP5 | CDGKFIRHKDEFYECGQLI  | Negative |
| Q5MJP5 | KFIRHKDEFYECGQLIGYQ  | Negative |
| Q5MJP5 | FIYFECDGKFIRHKDEFYE  | Negative |
| Q5MJP5 | YECGQLIGYQQYCVDACQAH | Negative |
| Q5MJP5 | YFECDGKFIRHKDEFYECG  | Negative |
| Q5MJP5 | HKDEFYECGQLIGYQQYCV  | Negative |
| Q5MJP5 | ECGQLIGYQQYCVDACQAHG | Negative |
| Q5MJP5 | KDEFYECGQLIGYQQYCVD  | Negative |
| Q5NAT0 | VLVFAAMAQVARGGGGGHDY | Negative |
| Q5NAT0 | SMAHHLGIALVVLVFAAMAQ | Negative |
| Q5NAT0 | GVSMHHLGIALVVLVFAAM  | Negative |
| Q5NAT0 | ARGGGAAGVSMHHLGIALV  | Negative |
| Q5NAT0 | GGGAAGVSMHHLGIALVVL  | Negative |
| Q5NAT0 | AMAQVARGGGGGHDYGMALS | Negative |
| Q5NAT0 | AAGVSMHHLGIALVVLVFA  | Negative |
| Q5NAT0 | QVARGGGGGHDYGMALSKI  | Negative |
| Q5NAT0 | AQVARGGGGGHDYGMALSKS | Negative |
| Q5NAT0 | LGIALVVLVFAAMAQVARGG | Negative |
| Q5NAT0 | VFAAMAQVARGGGGGHDYGM | Negative |
| Q5NAT0 | VSMHHLGIALVVLVFAAMA  | Negative |
| Q5NAT0 | IALVVLVFAAMAQVARGGGG | Negative |
| Q5NAT0 | FAAMAQVARGGGGGHDYGMA | Negative |
| Q5NAT0 | RGGGAAGVSMHHLGIALVV  | Negative |
| Q5NAT0 | GGAAGVSMHHLGIALVVLV  | Negative |
| Q5NAT0 | ALVVLVFAAMAQVARGGGGG | Negative |
| Q5NAT0 | HLGIALVVLVFAAMAQVARG | Negative |
| Q5NAT0 | AAMAQVARGGGGGHDYGMAL | Negative |
| Q5NAT0 | MAHHLGIALVVLVFAAMAQV | Negative |
| Q5NAT0 | HHLGIALVVLVFAAMAQVAR | Negative |
| Q5NAT0 | GIALVVLVFAAMAQVARGGG | Negative |
| Q5NAT0 | GAAGVSMHHLGIALVVLVF  | Negative |
| Q5NAT0 | VVLVFAAMAQVARGGGGGHD | Negative |
| Q5NAT0 | MAQVARGGGGGHDYGMALSK | Negative |
| Q5NAT0 | LVFAAMAQVARGGGGGHDYG | Negative |
| Q5NAT0 | AHHLGIALVVLVFAAMAQVA | Negative |
| Q5NAT0 | AGVSMHHLGIALVVLVFAA  | Negative |

|        |                        |          |
|--------|------------------------|----------|
| Q5NAT0 | MARGGGAAGVSM AHLGIAL   | Negative |
| Q5SME3 | LMAFLLL GGLALA QADGAKI | Negative |
| Q5SME3 | GAKIYAQCAGCHQQNGQGIP   | Negative |
| Q5SME3 | FLLLGGLALA QADGAKIYAQ  | Negative |
| Q5SME3 | AFLLLGGLALA QADGAKIYA  | Negative |
| Q5SME3 | AKIYAQCAGCHQQNGQGIPG   | Negative |
| Q5SME3 | AQCAGCHQQNGQGIPGAFPP   | Negative |
| Q5SME3 | GLALA QADGAKIYAQCAGCH  | Negative |
| Q5SME3 | ADGAKIYAQCAGCHQQNGQG   | Negative |
| Q5SME3 | LLLGGLALA QADGAKIYAQC  | Negative |
| Q5SME3 | KIYAQCAGCHQQNGQGIPGA   | Negative |
| Q5SME3 | TLMAFLLL GGLALA QADGAK | Negative |
| Q5SME3 | YAQCAGCHQQNGQGIPGAFP   | Negative |
| Q5SME3 | IYAQCAGCHQQNGQGIPGAF   | Negative |
| Q5SME3 | LALA QADGAKIYAQCAGCHQ  | Negative |
| Q5SME3 | GGLALA QADGAKIYAQCAGC  | Negative |
| Q5SME3 | LLGGLALA QADGAKIYAQCA  | Negative |
| Q5SME3 | AQADGAKIYAQCAGCHQQNG   | Negative |
| Q5SME3 | LAQADGAKIYAQCAGCHQQN   | Negative |
| Q5SME3 | QADGAKIYAQCAGCHQQNGQ   | Negative |
| Q5SME3 | QCAGCHQQNGQGIPGAFPPL   | Negative |
| Q5SME3 | DGAKIYAQCAGCHQQNGQGI   | Negative |
| Q5SME3 | MKRTLMAFLLL GGLALA QAD | Negative |
| Q5SME3 | MAFLLL GGLALA QADGAKIY | Negative |
| Q5SME3 | ALA QADGAKIYAQCAGCHQQ  | Negative |
| Q5SME3 | GCHQQNGQGIPGAFPPLAGH   | Negative |
| Q5SME3 | AGCHQQNGQGIPGAFPPLAG   | Negative |
| Q5SME3 | KRTLMAFLLL GGLALA QADG | Negative |
| Q5SME3 | LGGLALA QADGAKIYAQCAG  | Negative |
| Q5SME3 | CAGCHQQNGQGIPGAFPPLA   | Negative |
| Q5U9S1 | LLLCVVVTASYSEIKTCEDAQ  | Negative |
| Q5U9S1 | QKTCSVITCGIPVTNGTPGR   | Negative |
| Q5U9S1 | PVLLLCVVVTASYSEIKTCED  | Negative |
| Q5U9S1 | ASYSEIKTCEDAQKTCSVIT   | Negative |
| Q5U9S1 | LFSSLPVLLLCVVVTASYSEI  | Negative |
| Q5U9S1 | KTCSVITCGIPVTNGTPGRD   | Negative |
| Q5U9S1 | DAQKTCSVITCGIPVTNGTP   | Negative |
| Q5U9S1 | EIKTCEDAQKTCSVITCGIP   | Negative |
| Q5U9S1 | KTCEDAQKTCSVITCGIPVT   | Negative |
| Q5U9S1 | VVTASYSEIKTCEDAQKTCS   | Negative |
| Q5U9S1 | SEIKTCEDAQKTCSVITCGI   | Negative |
| Q5U9S1 | LCVVVTASYSEIKTCEDAQKT  | Negative |
| Q5U9S1 | SSLPVLLLCVVVTASYSEIKT  | Negative |
| Q5U9S1 | LLCVVVTASYSEIKTCEDAQK  | Negative |
| Q5U9S1 | CVVVTASYSEIKTCEDAQKTC  | Negative |
| Q5U9S1 | EDAQKTCSVITCGIPVTNGT   | Negative |

|        |                      |          |
|--------|----------------------|----------|
| Q5U9S1 | CEDAQKTCSVITCGIPVTNG | Negative |
| Q5U9S1 | IKTCEDAQKTCSVITCGIPV | Negative |
| Q5U9S1 | TASYSEIKTCEDAQKTCSVI | Negative |
| Q5U9S1 | LLFSSLPVLLLCVVTASYSE | Negative |
| Q5U9S1 | LPVLLLCVVTASYSEIKTCE | Negative |
| Q5U9S1 | SYSEIKTCEDAQKTCSVITC | Negative |
| Q5U9S1 | MLLFSSLPVLLLCVVTASYS | Negative |
| Q5U9S1 | VLLLCVVTASYSEIKTCEDA | Negative |
| Q5U9S1 | YSEIKTCEDAQKTCSVITCG | Negative |
| Q5U9S1 | AQKTCSVITCGIPVTNGTPG | Negative |
| Q5U9S1 | FSSLPVLLLCVVTASYSEIK | Negative |
| Q5U9S1 | VTASYSEIKTCEDAQKTCSV | Negative |
| Q5U9S1 | TCEDAQKTCSVITCGIPVTN | Negative |
| Q5W280 | VITGACDRDVQCGSGTCCAA | Negative |
| Q5W280 | DRDVQCGSGTCCAASAWSRN | Negative |
| Q5W280 | VQCGSGTCCAASAWSRNIRF | Negative |
| Q5W280 | LLVIAFSHGAVITGACDRDV | Negative |
| Q5W280 | ITGACDRDVQCGSGTCCAAS | Negative |
| Q5W280 | LVIAFSHGAVITGACDRDVQ | Negative |
| Q5W280 | VVLLLVIASFHGAVITGACD | Negative |
| Q5W280 | IAFSHGAVITGACDRDVQCG | Negative |
| Q5W280 | VIAFSHGAVITGACDRDVQC | Negative |
| Q5W280 | KCFAQIVVLLLVIASFHGAV | Negative |
| Q5W280 | MKCFAQIVVLLLVIASFHGA | Negative |
| Q5W280 | AFSHGAVITGACDRDVQCGS | Negative |
| Q5W280 | CDRDVQCGSGTCCAASAWSR | Negative |
| Q5W280 | FSHGAVITGACDRDVQCGSG | Negative |
| Q5W280 | GACDRDVQCGSGTCCAASAW | Negative |
| Q5W280 | DVQCGSGTCCAASAWSRNIR | Negative |
| Q5W280 | CFAQIVVLLLVIASFHGAVI | Negative |
| Q5W280 | FAQIVVLLLVIASFHGAVIT | Negative |
| Q5W280 | TGACDRDVQCGSGTCCAASA | Negative |
| Q5W280 | IVVLLLVIASFHGAVITGAC | Negative |
| Q5W280 | LLLVIASFHGAVITGACDRD | Negative |
| Q5W280 | HGAVITGACDRDVQCGSGTC | Negative |
| Q5W280 | SHGAVITGACDRDVQCGSGT | Negative |
| Q5W280 | QIVVLLLVIASFHGAVITGA | Negative |
| Q5W280 | GAVITGACDRDVQCGSGTCC | Negative |
| Q5W280 | AVITGACDRDVQCGSGTCCA | Negative |
| Q5W280 | RDVQCGSGTCCAASAWSRNI | Negative |
| Q5W280 | ACDRDVQCGSGTCCAASAWS | Negative |
| Q5W280 | VLLLVIASFHGAVITGACDR | Negative |
| Q5XM24 | KLLILLLSLVASIFSTPLD  | Negative |
| Q5XM24 | LLLSLVASIFSTPLDDYVNA | Negative |
| Q5XM24 | VASIFSTPLDDYVNAPDDTY | Negative |
| Q5XM24 | DYVNAPDDTYKWTLNNTIEY | Negative |



|        |                      |          |
|--------|----------------------|----------|
| Q5XM24 | DDYVNAPDDTYKWTLNNTIE | Negative |
| Q5XM24 | YVNAPDDTYKWTLNNTIEYE | Negative |
| Q5XM24 | TPLDDYVNAPDDTYKWTLNN | Negative |
| Q5XM24 | NAPDDTYKWTLNNTIEYETF | Negative |
| Q5XM24 | SKLLILLLSLVASIFSTPL  | Negative |
| Q5XM24 | LLSLVASIFSTPLDDYVNAP | Negative |
| Q5XM24 | LILLLSLVASIFSTPLDDY  | Negative |
| Q5XM24 | SLVASIFSTPLDDYVNAPDD | Negative |
| Q5XM24 | STPLDDYVNAPDDTYKWTLN | Negative |
| Q5XM24 | SIFSTPLDDYVNAPDDTYKW | Negative |
| Q5XM24 | IFSTPLDDYVNAPDDTYKWT | Negative |
| Q5XM24 | DTYKWTLNNTIEYETFTGYI | Negative |
| Q5XM24 | DDTYKWTLNNTIEYETFTGY | Negative |
| Q5XM24 | LDDYVNAPDDTYKWTLNNTI | Negative |
| Q5XM24 | APDDTYKWTLNNTIEYETFT | Negative |
| Q5XM24 | FSTPLDDYVNAPDDTYKWTL | Negative |
| Q5XM24 | VNAPDDTYKWTLNNTIEYET | Negative |
| Q5XM24 | PLDDYVNAPDDTYKWTLNNT | Negative |
| Q5XM24 | PDDTYKWTLNNTIEYETFTG | Negative |
| Q5XM24 | LVASIFSTPLDDYVNAPDDT | Negative |
| Q5XM24 | LSLVASIFSTPLDDYVNAPD | Negative |
| Q5XM24 | ILLLSLVASIFSTPLDDYV  | Negative |
| Q5XM24 | ASIFSTPLDDYVNAPDDTYK | Negative |
| Q5XM24 | MSKLLILLLSLVASIFSTP  | Negative |
| Q5XM24 | LLLSLVASIFSTPLDDYVN  | Negative |
| Q60477 | NGKDPAFTALITTQSQVQNE | Negative |
| Q60477 | FLITMLLPCVLTNGKDPAFT | Negative |
| Q60477 | ALITTQSQVQNEIINKHNQL | Negative |
| Q60477 | ALLPVVFLITMLLPCVLTN  | Negative |
| Q60477 | TMLLPCVLTNGKDPAFTALI | Negative |
| Q60477 | VLTNGKDPAFTALITTQSQV | Negative |
| Q60477 | AFTALITTQSQVQNEIINKH | Negative |
| Q60477 | PAFTALITTQSQVQNEIINK | Negative |
| Q60477 | TNGKDPAFTALITTQSQVQN | Negative |
| Q60477 | PCVLTNGKDPAFTALITTQS | Negative |
| Q60477 | ITMLLPCVLTNGKDPAFTAL | Negative |
| Q60477 | VVVFLITMLLPCVLTNGKDP | Negative |
| Q60477 | GKDPAFTALITTQSQVQNEI | Negative |
| Q60477 | MLLPCVLTNGKDPAFTALIT | Negative |
| Q60477 | CVLTNGKDPAFTALITTQSQ | Negative |
| Q60477 | LITMLLPCVLTNGKDPAFTA | Negative |
| Q60477 | PVVVFLITMLLPCVLTNGKD | Negative |
| Q60477 | LITTQSQVQNEIINKHNQLR | Negative |
| Q60477 | TALITTQSQVQNEIINKHNQ | Negative |
| Q60477 | VFLITMLLPCVLTNGKDPAF | Negative |
| Q60477 | LLPCVLTNGKDPAFTALITT | Negative |

|        |                      |          |
|--------|----------------------|----------|
| Q60477 | LPCVLTNGKDPAFTALITTQ | Negative |
| Q60477 | KDPAFTALITTQSQVQNEII | Negative |
| Q60477 | MALLPVVVFLITMLLPCVLT | Negative |
| Q60477 | LTNGKDPAFTALITTQSQVQ | Negative |
| Q60477 | LPVVVFLITMLLPCVLTNGK | Negative |
| Q60477 | DPAFTALITTQSQVQNEIIN | Negative |
| Q60477 | LLPVVVFLITMLLPCVLTNG | Negative |
| Q60477 | FTALITTQSQVQNEIINKHN | Negative |
| Q60557 | LLWVGLVLLMKPNDGTAYKL | Negative |
| Q60557 | TAYKLVCYFTNWAHSRPVPA | Negative |
| Q60557 | KPNDGTAYKLVCYFTNWAHS | Negative |
| Q60557 | CYFTNWAHSRPVPASILPRD | Negative |
| Q60557 | GLVLLMKPNDGTAYKLVCYF | Negative |
| Q60557 | LVLLMKPNDGTAYKLVCYFT | Negative |
| Q60557 | LLMKPNDGTAYKLVCYFTNW | Negative |
| Q60557 | KLVCYFTNWAHSRPVPASIL | Negative |
| Q60557 | GTAYKLVCYFTNWAHSRPVP | Negative |
| Q60557 | PNDGTAYKLVCYFTNWAHSR | Negative |
| Q60557 | DGTAYKLVCYFTNWAHSRPV | Negative |
| Q60557 | MKPNDGTAYKLVCYFTNWAH | Negative |
| Q60557 | FTNWAHSRPVPASILPRDL  | Negative |
| Q60557 | YFTNWAHSRPVPASILPRDL | Negative |
| Q60557 | TNWAHSRPVPASILPRDLP  | Negative |
| Q60557 | VLLMKPNDGTAYKLVCYFTN | Negative |
| Q60557 | LMKPNDGTAYKLVCYFTNWA | Negative |
| Q60557 | NWAHSRPVPASILPRDLDPF | Negative |
| Q60557 | VCYFTNWAHSRPVPASILPR | Negative |
| Q60557 | LVCYFTNWAHSRPVPASILP | Negative |
| Q60557 | AYKLVCYFTNWAHSRPVPAS | Negative |
| Q60557 | YKLVCYFTNWAHSRPVPASI | Negative |
| Q60557 | MGRLLLWVGLVLLMKPNDGT | Negative |
| Q60557 | NDGTAYKLVCYFTNWAHSRP | Negative |
| Q60557 | GRLLLWVGLVLLMKPNDGTA | Negative |
| Q60557 | LWVGLVLLMKPNDGTAYKLV | Negative |
| Q60557 | VGLVLLMKPNDGTAYKLVCY | Negative |
| Q60557 | RLLLWVGLVLLMKPNDGTAY | Negative |
| Q60557 | LLLWVGLVLLMKPNDGTAYK | Negative |
| Q60675 | GSQTQRRQSQAHQQRGLFPA | Negative |
| Q60675 | AATAGILLLLLGTLEGSQT  | Negative |
| Q60675 | SQTQRRQSQAHQQRGLFPAV | Negative |
| Q60675 | SQAHQQRGLFPAVLNLASNA | Negative |
| Q60675 | LLGTLEGSQTQRRQSQAHQ  | Negative |
| Q60675 | QRRQSQAHQQRGLFPAVLNL | Negative |
| Q60675 | MPAATAGILLLLLGTLEGS  | Negative |
| Q60675 | LLLLGTLEGSQTQRRQSQA  | Negative |
| Q60675 | RRQSQAHQQRGLFPAVLNLA | Negative |

|        |                      |          |
|--------|----------------------|----------|
| Q60675 | LGTLEGSQTQRRQSQAHHQR | Negative |
| Q60675 | ILLLLLLGTLEGSQTQRRQS | Negative |
| Q60675 | GILLLLLLGTLEGSQTQRRQ | Negative |
| Q60675 | QSQAHHQRGLFPAVLNLASN | Negative |
| Q60675 | LLGTLEGSQTQRRQSQAHHQ | Negative |
| Q60675 | HQQRGLFPAVLNLASNALIT | Negative |
| Q60675 | TLEGSQTQRRQSQAHHQRGL | Negative |
| Q60675 | QTQRRQSQAHHQRGLFPAVL | Negative |
| Q60675 | RQSQAHHQRGLFPAVLNLAS | Negative |
| Q60675 | TQRRQSQAHHQRGLFPAVLN | Negative |
| Q60675 | AGILLLLLLGTLEGSQTQRR | Negative |
| Q60675 | AHQRGLFPAVLNLASNALI  | Negative |
| Q60675 | GTLEGSQTQRRQSQAHHQRG | Negative |
| Q60675 | LLLGTLEGSQTQRRQSQA   | Negative |
| Q60675 | LEGSQTQRRQSQAHHQRGLF | Negative |
| Q60675 | QAHHQRGLFPAVLNLASNAL | Negative |
| Q60675 | EGSQTQRRQSQAHHQRGLFP | Negative |
| Q60675 | ATAGILLLLLLGTLEGSQTQ | Negative |
| Q60675 | PAATAGILLLLLLGTLEGSQ | Negative |
| Q60675 | LLLLLLGTLEGSQTQRRQSQ | Negative |
| Q60736 | VLGDCGPPPLLPFASPTNQL | Negative |
| Q60736 | LFQMTLATVLMAPVLGDCGP | Negative |
| Q60736 | PVLGDCGPPPLLPFASPTNQ | Negative |
| Q60736 | WRTSHSTLFQMTLATVLMAP | Negative |
| Q60736 | QMTLATVLMAPVLGDCGPPP | Negative |
| Q60736 | ATVLMAPVLGDCGPPPLLPF | Negative |
| Q60736 | MITWSFIDLWRTSHSTLFQM | Negative |
| Q60736 | HSTLFQMTLATVLMAPVLGD | Negative |
| Q60736 | STLFQMTLATVLMAPVLGDC | Negative |
| Q60736 | APVLGDCGPPPLLPFASPTN | Negative |
| Q60736 | SFIDLWRTSHSTLFQMTLAT | Negative |
| Q60736 | SHSTLFQMTLATVLMAPVLG | Negative |
| Q60736 | LMAPVLGDCGPPPLLPFASP | Negative |
| Q60736 | ITWSFIDLWRTSHSTLFQMT | Negative |
| Q60736 | VLMAPVLGDCGPPPLLPFAS | Negative |
| Q60736 | FIDLWRTSHSTLFQMTLATV | Negative |
| Q60736 | MTLATVLMAPVLGDCGPPPL | Negative |
| Q60736 | TLATVLMAPVLGDCGPPPLL | Negative |
| Q60736 | DLWRTSHSTLFQMTLATVLM | Negative |
| Q60736 | WSFIDLWRTSHSTLFQMTLA | Negative |
| Q60736 | LWRTSHSTLFQMTLATVLM  | Negative |
| Q60736 | TVLMAPVLGDCGPPPLLPFA | Negative |
| Q60736 | MAPVLGDCGPPPLLPFASPT | Negative |
| Q60736 | RTSHSTLFQMTLATVLMAPV | Negative |
| Q60736 | TSHSTLFQMTLATVLMAPVL | Negative |
| Q60736 | LATVLMAPVLGDCGPPPLLP | Negative |

|        |                      |          |
|--------|----------------------|----------|
| Q60736 | TWSFIDLWRTSHSTLFQMTL | Negative |
| Q60736 | TLFQMTLATVLMAPVLGDCG | Negative |
| Q60736 | IDLWRTSHSTLFQMTLATVL | Negative |
| Q60994 | LAPALVPPPKGTCAGWMAGI | Negative |
| Q60994 | MLLLQALLFLLILPSHAEDD | Negative |
| Q60994 | TEELAPALVPPPKGTCAGWM | Negative |
| Q60994 | APALVPPPKGTCAGWMAGIP | Negative |
| Q60994 | QALLFLLILPSHAEDDVT   | Negative |
| Q60994 | ILPSHAEDDVTTEELAPAL  | Negative |
| Q60994 | LFLILPSHAEDDVTTEEL   | Negative |
| Q60994 | DVTTEELAPALVPPKGTC   | Negative |
| Q60994 | PSHAEDDVTTEELAPALVP  | Negative |
| Q60994 | ELAPALVPPPKGTCAGWMAG | Negative |
| Q60994 | TTTEELAPALVPPKGTCAG  | Negative |
| Q60994 | LILPSHAEDDVTTEELAPA  | Negative |
| Q60994 | LPSHAEDDVTTEELAPALV  | Negative |
| Q60994 | FLLILPSHAEDDVTTEELA  | Negative |
| Q60994 | LLFLLILPSHAEDDVTTEE  | Negative |
| Q60994 | AEDDVTTEELAPALVPPPK  | Negative |
| Q60994 | ALLFLLILPSHAEDDVTTE  | Negative |
| Q60994 | LLILPSHAEDDVTTEELAP  | Negative |
| Q60994 | LLLQALLFLLILPSHAEDDV | Negative |
| Q60994 | VTTTEELAPALVPPKGTC   | Negative |
| Q60994 | DDVTTEELAPALVPPKGT   | Negative |
| Q60994 | LQALLFLLILPSHAEDDVT  | Negative |
| Q60994 | SHAEDDVTTEELAPALVPP  | Negative |
| Q60994 | PALVPPPKGTCAGWMAGIPG | Negative |
| Q60994 | TTEELAPALVPPKGTCAGW  | Negative |
| Q60994 | EDDVTTEELAPALVPPPKG  | Negative |
| Q60994 | EELAPALVPPPKGTCAGWMA | Negative |
| Q60994 | HAEDDVTTEELAPALVPPP  | Negative |
| Q60994 | ALVPPPKGTCAGWMAGIPGH | Negative |
| Q61001 | SAPGALGPRSPAPRLLLLL  | Negative |
| Q61001 | AGSAPGALGPRSPAPRLLL  | Negative |
| Q61001 | LGPRSPAPRLLLLLAGLAL  | Negative |
| Q61001 | GPRSPAPRLLLLLAGLALV  | Negative |
| Q61001 | RLLLLLAGLALVGEARTPG  | Negative |
| Q61001 | PRSPAPRLLLLLAGLALVG  | Negative |
| Q61001 | GQLCAGSAPGALGPRSPAPR | Negative |
| Q61001 | LLLLLAGLALVGEARTPGGD | Negative |
| Q61001 | GSAPGALGPRSPAPRLLLLL | Negative |
| Q61001 | APRLLLLLAGLALVGEART  | Negative |
| Q61001 | LLAGLALVGEARTPGGDGFS | Negative |
| Q61001 | PAPRLLLLLAGLALVGEAR  | Negative |
| Q61001 | QLCAGSAPGALGPRSPAPRP | Negative |
| Q61001 | PGALGPRSPAPRLLLLLAG  | Negative |

|        |                       |          |
|--------|-----------------------|----------|
| Q61001 | ALGPRSPAPRPLLLLLAGLA  | Negative |
| Q61001 | GGQLCAGSAPGALGPRSPAP  | Negative |
| Q61001 | RSPAPRPLLLLLAGLALVGE  | Negative |
| Q61001 | RGGQLCAGSAPGALGPRSPA  | Negative |
| Q61001 | LLLAGLALVGEARTPGGDGF  | Negative |
| Q61001 | MAKRGGQLCAGSAPGALGPR  | Negative |
| Q61001 | LCAGSAPGALGPRSPAPRPL  | Negative |
| Q61001 | GALGPRSPAPRPLLLLLAGL  | Negative |
| Q61001 | APGALGPRSPAPRPLLLLLA  | Negative |
| Q61001 | SPAPRPLLLLLAGLALVGEA  | Negative |
| Q61001 | KRGGQLCAGSAPGALGPRSP  | Negative |
| Q61001 | LLLLAGLALVGEARTPGGDG  | Negative |
| Q61001 | AKRGGQLCAGSAPGALGPRS  | Negative |
| Q61001 | CAGSAPGALGPRSPAPRPLL  | Negative |
| Q61001 | PRPLLLLLAGLALVGEARTP  | Negative |
| Q61247 | SAVDLPGQQPVSEQAQQKLP  | Negative |
| Q61247 | SPVSAVDLPGQQPVSEQAQQ  | Negative |
| Q61247 | TFSPVSAVDLPGQQPVSEQA  | Negative |
| Q61247 | MALLRGLLVLSLSCLQGPCF  | Negative |
| Q61247 | LSLSCLQGPCFTFSPVSAVD  | Negative |
| Q61247 | RGLLVLSLSCLQGPCFTFSP  | Negative |
| Q61247 | PVSAVDLPGQQPVSEQAQQK  | Negative |
| Q61247 | PCFTFSPVSAVDLPGQQPVS  | Negative |
| Q61247 | LPGQQPVSEQAQQKLPLPAL  | Negative |
| Q61247 | LLVLSLSCLQGPCFTFSPVS  | Negative |
| Q61247 | LSLSCLQGPCFTFSPVSAVDL | Negative |
| Q61247 | DLPGQQPVSEQAQQKLPLPA  | Negative |
| Q61247 | LVLSLSCLQGPCFTFSPVSA  | Negative |
| Q61247 | CFTFSPVSAVDLPGQQPVSE  | Negative |
| Q61247 | ALLRGLLVLSLSCLQGPCFT  | Negative |
| Q61247 | LLRGLLVLSLSCLQGPCFTF  | Negative |
| Q61247 | GPCFTFSPVSAVDLPGQQPV  | Negative |
| Q61247 | FTFSPVSAVDLPGQQPVSEQ  | Negative |
| Q61247 | LSCLQGPCFTFSPVSAVDLP  | Negative |
| Q61247 | LQGPCFTFSPVSAVDLPGQQ  | Negative |
| Q61247 | GLLVLSLSCLQGPCFTFSPV  | Negative |
| Q61247 | VLSLSCLQGPCFTFSPVSAV  | Negative |
| Q61247 | LRGLLVLSLSCLQGPCFTFS  | Negative |
| Q61247 | QGPCFTFSPVSAVDLPGQQP  | Negative |
| Q61247 | FSPVSAVDLPGQQPVSEQAQ  | Negative |
| Q61247 | AVDLPGQQPVSEQAQQKLPL  | Negative |
| Q61247 | VSAVDLPGQQPVSEQAQQKL  | Negative |
| Q61247 | VDLPGQQPVSEQAQQKLPLP  | Negative |
| Q61247 | CLQGPCFTFSPVSAVDLPGQ  | Negative |
| Q61400 | WSPATTAQVTVEAVPPNVTA  | Negative |
| Q61400 | PWVGLLLLTASLLTYWSPATT | Negative |

|        |                         |          |
|--------|-------------------------|----------|
| Q61400 | GLLLTASLLTYWSPATTAQV    | Negative |
| Q61400 | SPATTAQVTVEAVPPNVTAD    | Negative |
| Q61400 | VGLLLTASLLTYWSPATTAQ    | Negative |
| Q61400 | HKGQVPWVGLLLTASLLTYW    | Negative |
| Q61400 | ELASAH LHKGQVPWVG LLLT  | Negative |
| Q61400 | HLHKGQVPWVG LLLTASLLT   | Negative |
| Q61400 | GQVPWVG LLLTASLLTYWSP   | Negative |
| Q61400 | TASLLTYWSPATTAQVTVEA    | Negative |
| Q61400 | KGQVPWVG LLLTASLLTYWS   | Negative |
| Q61400 | SLLTYWSPATTAQVTVEAVP    | Negative |
| Q61400 | LLTYWSPATTAQVTVEAVPP    | Negative |
| Q61400 | LTASLLTYWSPATTAQVTVE    | Negative |
| Q61400 | LTYWSPATTAQVTVEAVPPN    | Negative |
| Q61400 | LASAH LHKGQVPWVG LLLTA  | Negative |
| Q61400 | ASAH LHKGQVPWVG L LLTAS | Negative |
| Q61400 | LLLTASLLTYWSPATTAQVT    | Negative |
| Q61400 | PATTAQVTVEAVPPNVTADN    | Negative |
| Q61400 | MELASAH LHKGQVPWVG LLL  | Negative |
| Q61400 | YWSPATTAQVTVEAVPPNVT    | Negative |
| Q61400 | WVG L LLTASLLTYWSPATTA  | Negative |
| Q61400 | ASLLTYWSPATTAQVTVEAV    | Negative |
| Q61400 | VPWVG L LLTASLLTYWSPAT  | Negative |
| Q61400 | LHKGQVPWVG L LLTASLLTY  | Negative |
| Q61400 | SAH LHKGQVPWVG L LLTASL | Negative |
| Q61400 | TYWSPATTAQVTVEAVPPNV    | Negative |
| Q61400 | AH LHKGQVPWVG L LLTASLL | Negative |
| Q61400 | QVPWVG L LLTASLLTYWSPA  | Negative |
| Q61508 | ALASAASEGAFKASDQREMT    | Negative |
| Q61508 | ASDQREMTPERLFQHLHEVG    | Negative |
| Q61508 | TVSRAALILACLALASAASE    | Negative |
| Q61508 | CLALASAASEGAFKASDQRE    | Negative |
| Q61508 | AASEGAFKASDQREMTPERL    | Negative |
| Q61508 | EGAFKASDQREMTPERLFQH    | Negative |
| Q61508 | QREMTPERLFQHLHEVG YAA   | Negative |
| Q61508 | FKASDQREMTPERLFQHLHE    | Negative |
| Q61508 | AALILACLALASAASEGAFK    | Negative |
| Q61508 | ILACLALASAASEGAFKASD    | Negative |
| Q61508 | MGTVSRAALILACLALASAA    | Negative |
| Q61508 | KASDQREMTPERLFQHLHEV    | Negative |
| Q61508 | LILACLALASAASEGAFKAS    | Negative |
| Q61508 | ALILACLALASAASEGAFKA    | Negative |
| Q61508 | RAALILACLALASAASEGAF    | Negative |
| Q61508 | SDQREMTPERLFQHLHEVG Y   | Negative |
| Q61508 | SAASEGAFKASDQREMTPER    | Negative |
| Q61508 | LACLALASAASEGAFKASDQ    | Negative |
| Q61508 | ASEGAFKASDQREMTPERLF    | Negative |

|        |                       |          |
|--------|-----------------------|----------|
| Q61508 | LALASAASEGAFKASDQREM  | Negative |
| Q61508 | AFKASDQREMTPERLFQHLH  | Negative |
| Q61508 | ASAASEGAFKASDQREMTPE  | Negative |
| Q61508 | VSRAALILACLALASAASEG  | Negative |
| Q61508 | LASAASEGAFKASDQREMT   | Negative |
| Q61508 | GTVSRAALILACLALASAAS  | Negative |
| Q61508 | SEGAFKASDQREMTPERLFQ  | Negative |
| Q61508 | GAFKASDQREMTPERLFQHL  | Negative |
| Q61508 | ACLALASAASEGAFKASDQR  | Negative |
| Q61508 | DQREMTPERLFQHLHEVGYA  | Negative |
| Q61789 | LLLLRMSPSWSVVGQDHPMS  | Negative |
| Q61789 | PLLLTLLLLLLLLRMSPSWSV | Negative |
| Q61789 | RMSPSWSVVGQDHPMSSRSL  | Negative |
| Q61789 | LPLLLTLLLLLLLLRMSPSW  | Negative |
| Q61789 | LLLLLLRMSPSWSVVGQDH   | Negative |
| Q61789 | MAVALGRAPRSLPLLLTLLL  | Negative |
| Q61789 | ALGRAPRSLPLLLTLLLLLL  | Negative |
| Q61789 | RAPRSLPLLLTLLLLLLLLRM | Negative |
| Q61789 | MSPSWSVVGQDHPMSSRSLH  | Negative |
| Q61789 | LRMSPSWSVVGQDHPMSSRS  | Negative |
| Q61789 | AVALGRAPRSLPLLLTLLLL  | Negative |
| Q61789 | PRSLPLLLTLLLLLLLLRMSP | Negative |
| Q61789 | LLLLLLRMSPSWSVVGQDHP  | Negative |
| Q61789 | SWSVVGQDHPMSSRSLHPPY  | Negative |
| Q61789 | PSWSVVGQDHPMSSRSLHPP  | Negative |
| Q61789 | VALGRAPRSLPLLLTLLLLLL | Negative |
| Q61789 | GRAPRSLPLLLTLLLLLLLLR | Negative |
| Q61789 | WSVVGQDHPMSSRSLHPPYF  | Negative |
| Q61789 | LLLLLRMSPSWSVVGQDHPM  | Negative |
| Q61789 | LGRAPRSLPLLLTLLLLLLLL | Negative |
| Q61789 | LLRMSPSWSVVGQDHPMSSR  | Negative |
| Q61789 | LLLRMSPSWSVVGQDHPMSS  | Negative |
| Q61789 | SPSWSVVGQDHPMSSRSLHP  | Negative |
| Q61789 | APRSLPLLLTLLLLLLLLRMS | Negative |
| Q61789 | SLPLLLTLLLLLLLLRMSPSW | Negative |
| Q61789 | LTLLLLLLLLRMSPSWSVVGQ | Negative |
| Q61789 | LTLLLLLLLLRMSPSWSVVG  | Negative |
| Q61789 | RSLPLLLTLLLLLLLLRMSPS | Negative |
| Q61789 | LLTLLLLLLLLRMSPSWSVV  | Negative |
| Q62598 | PVPQLVPLERDIVEKSADVP  | Negative |
| Q62598 | VPLERDIVEKSADVPFLAHP  | Negative |
| Q62598 | CIWATAWAIPVPQLVPLERD  | Negative |
| Q62598 | LVPLERDIVEKSADVPFLAH  | Negative |
| Q62598 | IIYICIWATAWAIPVPQLV   | Negative |
| Q62598 | DIVEKSADVPFLAHPGTAAQ  | Negative |
| Q62598 | IPVPQLVPLERDIVEKSADV  | Negative |

|        |                       |          |
|--------|-----------------------|----------|
| Q62598 | QLVPLERDIVEKSADVPFLA  | Negative |
| Q62598 | WAIPVPQLVPLERDIVEKSA  | Negative |
| Q62598 | IYICIWATAWAIPVPQLVPL  | Negative |
| Q62598 | ERDIVEKSADVPFLAHPGTA  | Negative |
| Q62598 | KTKIIYICIWATAWAIPVP   | Negative |
| Q62598 | MKTKIIYICIWATAWAIPV   | Negative |
| Q62598 | ICIWATAWAIPVPQLVPLER  | Negative |
| Q62598 | TAWAIPVPQLVPLERDIVEK  | Negative |
| Q62598 | LERDIVEKSADVPFLAHPGT  | Negative |
| Q62598 | RDIVEKSADVPFLAHPGTAA  | Negative |
| Q62598 | VPQLVPLERDIVEKSADVPF  | Negative |
| Q62598 | PLERDIVEKSADVPFLAHPG  | Negative |
| Q62598 | ATAWAIPVPQLVPLERDIVE  | Negative |
| Q62598 | YICIWATAWAIPVPQLVPLE  | Negative |
| Q62598 | WATAWAIPVPQLVPLERDIV  | Negative |
| Q62598 | IWATAWAIPVPQLVPLERDI  | Negative |
| Q62598 | KIIYICIWATAWAIPVPQL   | Negative |
| Q62598 | IVEKSADVPFLAHPGTAAQN  | Negative |
| Q62598 | PQLVPLERDIVEKSADVPFL  | Negative |
| Q62598 | AWAIPVPQLVPLERDIVEKS  | Negative |
| Q62598 | IYICIWATAWAIPVPQLVP   | Negative |
| Q62598 | AIPVPQLVPLERDIVEKSAD  | Negative |
| Q62703 | LLLLLYAAVAGASKAEELHY  | Negative |
| Q62703 | ELHYPQGEHRADYDRETLG   | Negative |
| Q62703 | LLLLLLLYAAVAGASKAEEL  | Negative |
| Q62703 | ASKAEELHYPQGEHRADYDR  | Negative |
| Q62703 | LLLLLLLYAAVAGASKAEELH | Negative |
| Q62703 | LLLLLYAAVAGASKAEELHYP | Negative |
| Q62703 | LLLYAAVAGASKAEELHYPQ  | Negative |
| Q62703 | AAVAGASKAEELHYPQGEHR  | Negative |
| Q62703 | LGLLLLLLLLYAAVAGASKAE | Negative |
| Q62703 | RPAVLGLLLLLLLYAAVAGA  | Negative |
| Q62703 | RLGPRPAVLGLLLLLLLYAA  | Negative |
| Q62703 | GPRPAVLGLLLLLLLYAAVA  | Negative |
| Q62703 | MRLGPRPAVLGLLLLLLLYA  | Negative |
| Q62703 | SKAEELHYPQGEHRADYDRE  | Negative |
| Q62703 | AVAGASKAEELHYPQGEHRA  | Negative |
| Q62703 | KAEELHYPQGEHRADYDRET  | Negative |
| Q62703 | VLGLLLLLLLYAAVAGASKA  | Negative |
| Q62703 | AVLGLLLLLLLYAAVAGASK  | Negative |
| Q62703 | LYAAVAGASKAEELHYPQGE  | Negative |
| Q62703 | AGASKAEELHYPQGEHRADY  | Negative |
| Q62703 | YAAVAGASKAEELHYPQGEH  | Negative |
| Q62703 | AEELHYPQGEHRADYDRETL  | Negative |
| Q62703 | LLYAAVAGASKAEELHYPQG  | Negative |
| Q62703 | EELHYPQGEHRADYDRETL   | Negative |



|        |                       |          |
|--------|-----------------------|----------|
| Q62703 | VAGASKAEELHYPQGEHRAD  | Negative |
| Q62703 | PAVLGLLLLLLLLYAAVAGAS | Negative |
| Q62703 | PRPAVLGLLLLLLLLYAAVAG | Negative |
| Q62703 | LGPRPAVLGLLLLLLLLYAAV | Negative |
| Q62703 | GASKAEELHYPQGEHRADYD  | Negative |
| Q62718 | CGYLFLPWKCLVVVSLRLLF  | Negative |
| Q62718 | VPTGVPVRSGDATFPKAMD   | Negative |
| Q62718 | YLFLPWKCLVVVSLRLLFLV  | Negative |
| Q62718 | VPVRSGDATFPKAMDNVTVR  | Negative |
| Q62718 | GVCGYLFLPWKCLVVVSLRL  | Negative |
| Q62718 | KCLVVVSLRLLFLVPTGVPV  | Negative |
| Q62718 | CLVVVSLRLLFLVPTGVPVR  | Negative |
| Q62718 | LVPTGVPVRSGDATFPKAMD  | Negative |
| Q62718 | LFLPWKCLVVVSLRLLFLVP  | Negative |
| Q62718 | VSLRLLFLVPTGVPVRSGDA  | Negative |
| Q62718 | PWKCLVVVSLRLLFLVPTGV  | Negative |
| Q62718 | FLPWKCLVVVSLRLLFLVPT  | Negative |
| Q62718 | VCGYLFLPWKCLVVVSLRLL  | Negative |
| Q62718 | VVVSLRLLFLVPTGVPVRSG  | Negative |
| Q62718 | RLLFLVPTGVPVRSGDATFP  | Negative |
| Q62718 | FLVPTGVPVRSGDATFPKAM  | Negative |
| Q62718 | LLFLVPTGVPVRSGDATFPK  | Negative |
| Q62718 | GYLFLPWKCLVVVSLRLLFL  | Negative |
| Q62718 | VVSLRLLFLVPTGVPVRSGD  | Negative |
| Q62718 | PTGVPVRSGDATFPKAMDNV  | Negative |
| Q62718 | MGVCGYLFLPWKCLVVVSLR  | Negative |
| Q62718 | PVRSGDATFPKAMDNVTVRQ  | Negative |
| Q62718 | LFLVPTGVPVRSGDATFPKA  | Negative |
| Q62718 | LPWKCLVVVSLRLLFLVPTG  | Negative |
| Q62718 | LVVVSLRLLFLVPTGVPVRS  | Negative |
| Q62718 | GVPVRSGDATFPKAMDNVTV  | Negative |
| Q62718 | TGVPVRSGDATFPKAMDNT   | Negative |
| Q62718 | WKCLVVVSLRLLFLVPTGVP  | Negative |
| Q62813 | QPDRKQLPLVLLRLLCLLPT  | Negative |
| Q62813 | PDRKQLPLVLLRLLCLLPTG  | Negative |
| Q62813 | LLCLLPTGLPVRSDFNRTG   | Negative |
| Q62813 | PVRSDFNRTGTDNITVRQGD  | Negative |
| Q62813 | LPVRSDFNRTGTDNITVRQG  | Negative |
| Q62813 | RVQPDRKQLPLVLLRLLCLL  | Negative |
| Q62813 | DRKQLPLVLLRLLCLLPTGL  | Negative |
| Q62813 | GLPVRSDFNRTGTDNITVRQ  | Negative |
| Q62813 | KQLPLVLLRLLCLLPTGLPV  | Negative |
| Q62813 | VGRVQPDRKQLPLVLLRLLC  | Negative |
| Q62813 | VQPDRKQLPLVLLRLLCLLP  | Negative |
| Q62813 | LPTGLPVRSDFNRTGTDNIT  | Negative |
| Q62813 | LRLCLLPTGLPVRSDFNRT   | Negative |

|        |                      |          |
|--------|----------------------|----------|
| Q62813 | LLPTGLPVRSVDFNRGTDNI | Negative |
| Q62813 | GRVQPDRKQLPLVLLRLLCL | Negative |
| Q62813 | CLLPTGLPVRSVDFNRGTDN | Negative |
| Q62813 | RKQLPLVLLRLLCLLPTGLP | Negative |
| Q62813 | QLPLVLLRLLCLLPTGLPVR | Negative |
| Q62813 | RSVDFNRGTDNITVRQGDTA | Negative |
| Q62813 | PTGLPVRSVDFNRGTDNITV | Negative |
| Q62813 | VLLRLLCLLPTGLPVRSVDF | Negative |
| Q62813 | VRSVDFNRGTDNITVRQGDT | Negative |
| Q62813 | PLVLLRLLCLLPTGLPVRSV | Negative |
| Q62813 | LPLVLLRLLCLLPTGLPVRS | Negative |
| Q62813 | RLLCLLPTGLPVRSVDFNRG | Negative |
| Q62813 | MVGRVQPDRKQLPLVLLRLL | Negative |
| Q62813 | TGLPVRSVDFNRGTDNITVR | Negative |
| Q62813 | LLRLLCLLPTGLPVRSVDFN | Negative |
| Q62813 | LCLLPTGLPVRSVDFNRGTD | Negative |
| Q62867 | SPGLSGSYERGSKRPIIGII | Negative |
| Q62867 | GSKRPIIGIIMQECYGNMTK | Negative |
| Q62867 | LLCGLASPGLSGSYERGSK  | Negative |
| Q62867 | SLGRLLCAWVLLLCGLASPG | Negative |
| Q62867 | GRLLCAWVLLLCGLASPGLS | Negative |
| Q62867 | ASPGLSGSYERGSKRPIIGI | Negative |
| Q62867 | CAWVLLLCGLASPGLSGSYE | Negative |
| Q62867 | GSYERGSKRPIIGIIMQECY | Negative |
| Q62867 | YERGSKRPIIGIIMQECYGN | Negative |
| Q62867 | VLLLCGLASPGLSGSYERGS | Negative |
| Q62867 | LCAWVLLLCGLASPGLSGSY | Negative |
| Q62867 | MASLGRLLCAWVLLLCGLAS | Negative |
| Q62867 | SGSYERGSKRPIIGIIMQEC | Negative |
| Q62867 | WVLLLCGLASPGLSGSYERG | Negative |
| Q62867 | LSGSYERGSKRPIIGIIMQE | Negative |
| Q62867 | LCGLASPGLSGSYERGSKR  | Negative |
| Q62867 | LLCGLASPGLSGSYERGSKR | Negative |
| Q62867 | RGSKRPIIGIIMQECYGNMT | Negative |
| Q62867 | ASLGRLLCAWVLLLCGLASP | Negative |
| Q62867 | RLLCAWVLLLCGLASPGLSG | Negative |
| Q62867 | GLASPGLSGSYERGSKRPII | Negative |
| Q62867 | GLSGSYERGSKRPIIGIIMQ | Negative |
| Q62867 | CGLASPGLSGSYERGSKRPI | Negative |
| Q62867 | LLCAWVLLLCGLASPGLSGS | Negative |
| Q62867 | ERGSKRPIIGIIMQECYGNM | Negative |
| Q62867 | LGRLLCAWVLLLCGLASPGL | Negative |
| Q62867 | PGLSGSYERGSKRPIIGIIM | Negative |
| Q62867 | SYERGSKRPIIGIIMQECYG | Negative |
| Q62867 | LASPGLSGSYERGSKRPIIG | Negative |
| Q62894 | LILACLALASAASEGAFKVS | Negative |

|        |                        |          |
|--------|------------------------|----------|
| Q62894 | ILACLALASAASEGAFKVSD   | Negative |
| Q62894 | VSDQREMKPEHLFQHLHEVG   | Negative |
| Q62894 | SDQREMKPEHLFQHLHEVG Y  | Negative |
| Q62894 | LALASAASEGAFKVSDQREM   | Negative |
| Q62894 | SEGAFKVSDQREMKPEHLFQ   | Negative |
| Q62894 | LACLALASAASEGAFKVSDQ   | Negative |
| Q62894 | SALILACLALASAASEGAFK   | Negative |
| Q62894 | QREMKPEHLFQHLHEVG YAA  | Negative |
| Q62894 | SSALILACLALASAASEGAF   | Negative |
| Q62894 | EGAFKVSDQREMKPEHLFQH   | Negative |
| Q62894 | AFKVSDQREMKPEHLFQHLH   | Negative |
| Q62894 | KVSDQREMKPEHLFQHLHEV   | Negative |
| Q62894 | CLALASAASEGAFKVSDQRE   | Negative |
| Q62894 | LASAASEGAFKVSDQREMKP   | Negative |
| Q62894 | SAASEGAFKVSDQREMKPEH   | Negative |
| Q62894 | DQREMKPEHLFQHLHEVG Y A | Negative |
| Q62894 | TIRSSALILACLALASAASE   | Negative |
| Q62894 | GAFKVSDQREMKPEHLFQHL   | Negative |
| Q62894 | ALILACLALASAASEGAFKV   | Negative |
| Q62894 | ASEGAFKVSDQREMKPEHLF   | Negative |
| Q62894 | AASEGAFKVSDQREMKPEHL   | Negative |
| Q62894 | FKVSDQREMKPEHLFQHLHE   | Negative |
| Q62894 | GTIRSSALILACLALASAAS   | Negative |
| Q62894 | IRSSALILACLALASAASEG   | Negative |
| Q62894 | MGTIRSSALILACLALASAA   | Negative |
| Q62894 | ALASAASEGAFKVSDQREMK   | Negative |
| Q62894 | ACLALASAASEGAFKVSDQR   | Negative |
| Q62894 | ASAASEGAFKVSDQREMKPE   | Negative |
| Q63010 | VVDTMKGKVLGKYASLEGVT   | Negative |
| Q63010 | VDTMKGKVLGKYASLEGVTQ   | Negative |
| Q63010 | KGKVLGKYASLEGVTQSVAV   | Negative |
| Q63010 | PSSPPVVDTMKGKVLGKYAS   | Negative |
| Q63010 | SPPVVDTMKGKVLGKYASLE   | Negative |
| Q63010 | LATCVVCGNPSSPPVVDTMK   | Negative |
| Q63010 | SLFLVSLATCVVCGNPSSPP   | Negative |
| Q63010 | SLATCVVCGNPSSPPVVDTM   | Negative |
| Q63010 | FLVSLATCVVCGNPSSPPVV   | Negative |
| Q63010 | NPSSPPVVDTMKGKVLGKYA   | Negative |
| Q63010 | DTMKGKVLGKYASLEGVTQS   | Negative |
| Q63010 | PVVDTMKGKVLGKYASLEGV   | Negative |
| Q63010 | VSLATCVVCGNPSSPPVVDT   | Negative |
| Q63010 | CVVCGNPSSPPVVDTMKGKV   | Negative |
| Q63010 | LFLVSLATCVVCGNPSSPPV   | Negative |
| Q63010 | MKGKVLGKYASLEGVTQSV A  | Negative |
| Q63010 | CGNPSSPPVVDTMKGKVLGK   | Negative |
| Q63010 | MCLRSFLVSLATCVVCGNP    | Negative |

|        |                       |          |
|--------|-----------------------|----------|
| Q63010 | VVCGNPSSPPVVDTMKGKVL  | Negative |
| Q63010 | VCGNPSSPPVVDTMKGKVLG  | Negative |
| Q63010 | SSPPVVDTMKGKVLGKYASL  | Negative |
| Q63010 | TCVVCGNPSSPPVVDTMKGK  | Negative |
| Q63010 | GNPSSPPVVDTMKGKVLGKY  | Negative |
| Q63010 | CLRSLFLVSLATCVVCGNPS  | Negative |
| Q63010 | TMKGKVLGKYASLEGVTQSV  | Negative |
| Q63010 | LVSLATCVVCGNPSSPPVVD  | Negative |
| Q63010 | ATCVVCGNPSSPPVVDTMKG  | Negative |
| Q63010 | PPVVDTMKGKVLGKYASLEG  | Negative |
| Q63010 | LRSFLVSLATCVVCGNPSS   | Negative |
| Q63041 | AATGKPRYVVLVPSELYAGV  | Negative |
| Q63041 | MRRNQLPIPVFLLLLLLLPR  | Negative |
| Q63041 | LLPRDATAATGKPRYVVLVP  | Negative |
| Q63041 | TGKPRYVVLVPSELYAGVPE  | Negative |
| Q63041 | LPIPVFLLLLLLLPRDATAA  | Negative |
| Q63041 | TAATGKPRYVVLVPSELYAG  | Negative |
| Q63041 | PRDATAATGKPRYVVLVPSE  | Negative |
| Q63041 | IPVFLLLLLLLPRDATAATG  | Negative |
| Q63041 | RYVVLVPSELYAGVPEKVCV  | Negative |
| Q63041 | RNQLPIPVFLLLLLLLPRDA  | Negative |
| Q63041 | ATGKPRYVVLVPSELYAGVP  | Negative |
| Q63041 | QLPIPVFLLLLLLLPRDATA  | Negative |
| Q63041 | PRYVVLVPSELYAGVPEKVC  | Negative |
| Q63041 | PVFLLLLLLLPRDATAATGK  | Negative |
| Q63041 | LLLPRDATAATGKPRYVVLV  | Negative |
| Q63041 | RRNQLPIPVFLLLLLLLPRD  | Negative |
| Q63041 | LLLLPRDATAATGKPRYVV   | Negative |
| Q63041 | RDATAATGKPRYVVLVPSEL  | Negative |
| Q63041 | NQLPIPVFLLLLLLLPRDAT  | Negative |
| Q63041 | LLLLLLLPRDATAATGKPRY  | Negative |
| Q63041 | LLLLLLLPRDATAATGKPRYV | Negative |
| Q63041 | KPRYVVLVPSELYAGVPEKV  | Negative |
| Q63041 | LPRDATAATGKPRYVVLVPS  | Negative |
| Q63041 | PIPVFLLLLLLLPRDATAAT  | Negative |
| Q63041 | LLLPRDATAATGKPRYVVL   | Negative |
| Q63041 | ATAATGKPRYVVLVPSELYA  | Negative |
| Q63041 | DATAATGKPRYVVLVPSELY  | Negative |
| Q63041 | GKPRYVVLVPSELYAGVPEK  | Negative |
| Q63041 | FLLLLLLLPRDATAATGKPR  | Negative |
| Q63415 | PRPWRLLLLALPAVCSALP   | Negative |
| Q63415 | PWRWLLLLALPAVCSALPPP  | Negative |
| Q63415 | PRAPPAGPRPPRAAGRHG    | Negative |
| Q63415 | APGPRPPRAAGRHGLSPLA   | Negative |
| Q63415 | PAPGPRPPRAAGRHGLSPL   | Negative |
| Q63415 | GLSPLAPRPWRLLLLALPA   | Negative |

|        |                      |          |
|--------|----------------------|----------|
| Q63415 | LSPLAPRPWRWLLLLALPAV | Negative |
| Q63415 | PGPRPPPRAAGRHGLSPLAP | Negative |
| Q63415 | RPWRWLLLLALPAVCSALPP | Negative |
| Q63415 | PPRAAGRHGLSPLAPRPWRW | Negative |
| Q63415 | PPAPGPRPPPRAAGRHGLSP | Negative |
| Q63415 | APRPWRWLLLLALPAVCSAL | Negative |
| Q63415 | PLAPRPWRWLLLLALPAVCS | Negative |
| Q63415 | PRPPPRAAGRHGLSPLAPRP | Negative |
| Q63415 | RAAGRHGLSPLAPRPWRWLL | Negative |
| Q63415 | PPRAPPAPGPRPPPRAAGRH | Negative |
| Q63415 | GRHGLSPLAPRPWRWLLLLA | Negative |
| Q63415 | MPPRAPPAPGPRPPPRAAGR | Negative |
| Q63415 | RAPPAPGPRPPPRAAGRHGL | Negative |
| Q63415 | GPRPPPRAAGRHGLSPLAPR | Negative |
| Q63415 | PPPRAAGRHGLSPLAPRPWR | Negative |
| Q63415 | PRAAGRHGLSPLAPRPWRWL | Negative |
| Q63415 | SPLAPRPWRWLLLLALPAVC | Negative |
| Q63415 | HGLSPLAPRPWRWLLLLALP | Negative |
| Q63415 | AAGRHGLSPLAPRPWRWLLL | Negative |
| Q63415 | RPPPRAAGRHGLSPLAPRPW | Negative |
| Q63415 | LAPRPWRWLLLLALPAVCSA | Negative |
| Q63415 | APPAPGPRPPPRAAGRHGLS | Negative |
| Q63415 | RHGLSPLAPRPWRWLLLLAL | Negative |
| Q63415 | AGRHGLSPLAPRPWRWLLL  | Negative |
| Q63617 | LADLLALSDTLAVMSVDLGS | Negative |
| Q63617 | LCWALVAVLLADLLALSDTL | Negative |
| Q63617 | LALSDTLAVMSVDLGSESMK | Negative |
| Q63617 | CWALVAVLLADLLALSDTLA | Negative |
| Q63617 | TVRRQRPRLLCWALVAVLL  | Negative |
| Q63617 | ALVAVLLADLLALSDTLAVM | Negative |
| Q63617 | VLLADLLALSDTLAVMSVDL | Negative |
| Q63617 | ALSDTLAVMSVDLGSESMKV | Negative |
| Q63617 | AATVRRQRPRLLCWALVAV  | Negative |
| Q63617 | VRRQRPRLLCWALVAVLLA  | Negative |
| Q63617 | PRLLCWALVAVLLADLLAL  | Negative |
| Q63617 | DLLALSDTLAVMSVDLGSES | Negative |
| Q63617 | RLLCWALVAVLLADLLALS  | Negative |
| Q63617 | MAATVRRQRPRLLCWALVA  | Negative |
| Q63617 | RPRLLCWALVAVLLADLLA  | Negative |
| Q63617 | WALVAVLLADLLALSDTLAV | Negative |
| Q63617 | ATVRRQRPRLLCWALVAVL  | Negative |
| Q63617 | LLADLLALSDTLAVMSVDLG | Negative |
| Q63617 | LLCWALVAVLLADLLALS   | Negative |
| Q63617 | LSDTLAVMSVDLGSESMKVA | Negative |
| Q63617 | AVLLADLLALSDTLAVMSVD | Negative |
| Q63617 | VAVLLADLLALSDTLAVMSV | Negative |

|        |                      |          |
|--------|----------------------|----------|
| Q63617 | RRQRPRLLCWALVAVLLAD  | Negative |
| Q63617 | ADLLALSDTLAVMSVDLGSE | Negative |
| Q63617 | QRPRRLLCWALVAVLLADLL | Negative |
| Q63617 | RQRPRRLLCWALVAVLLADL | Negative |
| Q63617 | SDTLAVMSVDLGSESMKVAI | Negative |
| Q63617 | LLALSDTLAVMSVDLGSESM | Negative |
| Q63617 | RRLLCWALVAVLLADLLALS | Negative |
| Q64277 | LGARARWRGEGTTPHLQSIF | Negative |
| Q64277 | LTVLLGARARWRGEGTTPHL | Negative |
| Q64277 | TVLLGARARWRGEGTTPHLQ | Negative |
| Q64277 | RWRGEGTTPHLQSIFLGRCA | Negative |
| Q64277 | GLLSLWLWLWLSLLTVLLGA | Negative |
| Q64277 | SLWLWLWLSLLTVLLGARAR | Negative |
| Q64277 | ARWRGEGTTPHLQSIFLGR  | Negative |
| Q64277 | SLLTVLLGARARWRGEGTTP | Negative |
| Q64277 | GGLLSLWLWLWLSLLTVLLG | Negative |
| Q64277 | RGEGTTPHLQSIFLGRCAEY | Negative |
| Q64277 | LLTVLLGARARWRGEGTTPH | Negative |
| Q64277 | LSLWLWLWLSLLTVLLGARA | Negative |
| Q64277 | MAVQGGLLSLWLWLWLSLLT | Negative |
| Q64277 | WLSLLTVLLGARARWRGEGT | Negative |
| Q64277 | GARARWRGEGTTPHLQSIFL | Negative |
| Q64277 | RARWRGEGTTPHLQSIFLGR | Negative |
| Q64277 | WLWLSLLTVLLGARARWRGE | Negative |
| Q64277 | WLWLWLSLLTVLLGARARWR | Negative |
| Q64277 | AVQGGLLSLWLWLWLSLLTV | Negative |
| Q64277 | LSLLTVLLGARARWRGEGTT | Negative |
| Q64277 | WRGEGTTPHLQSIFLGRCAE | Negative |
| Q64277 | VQGGLLSLWLWLWLSLLTVL | Negative |
| Q64277 | LLGARARWRGEGTTPHLQSI | Negative |
| Q64277 | ARARWRGEGTTPHLQSIFLG | Negative |
| Q64277 | VLLGARARWRGEGTTPHLQS | Negative |
| Q64277 | LWLSLLTVLLGARARWRGEG | Negative |
| Q64277 | LLSLWLWLWLSLLTVLLGAR | Negative |
| Q64277 | LWLWLSLLTVLLGARARWRG | Negative |
| Q64277 | QGGLLSLWLWLWLSLLTVLL | Negative |
| Q64424 | WTTGLLLLATARGNEVCYSH | Negative |
| Q64424 | ARGNEVCYSHLGCFSDEKPW | Negative |
| Q64424 | TARGNEVCYSHLGCFSDEKP | Negative |
| Q64424 | VWTTGLLLLATARGNEVCYS | Negative |
| Q64424 | YSHLGCFSDEKPWAGTLQRP | Negative |
| Q64424 | LATARGNEVCYSHLGCFSDE | Negative |
| Q64424 | CFSDEKPWAGTLQRPVKSLP | Negative |
| Q64424 | FSDEKPWAGTLQRPVKSLPA | Negative |
| Q64424 | LFVWTTGLLLLATARGNEVC | Negative |
| Q64424 | LLATARGNEVCYSHLGCFS  | Negative |

|        |                      |          |
|--------|----------------------|----------|
| Q64424 | VCYSHLGCFSDEKPWAGTLQ | Negative |
| Q64424 | GCFSDEKPWAGTLQRPVKS  | Negative |
| Q64424 | LGCFSDEKPWAGTLQRPVKS | Negative |
| Q64424 | NEVCYSHLGCFSDEKPWAGT | Negative |
| Q64424 | SHLGCFSDEKPWAGTLQRPV | Negative |
| Q64424 | LLLATARGNEVCYSHLGCFS | Negative |
| Q64424 | TTGLLLLATARGNEVCYSHL | Negative |
| Q64424 | RGNEVCYSHLGCFSDEKPWA | Negative |
| Q64424 | HLGCFSDEKPWAGTLQRPVK | Negative |
| Q64424 | LLLATARGNEVCYSHLGC   | Negative |
| Q64424 | CYSHLGCFSDEKPWAGTLQR | Negative |
| Q64424 | MLFVWTTGLLLLATARGNEV | Negative |
| Q64424 | MMLFVWTTGLLLLATARGNE | Negative |
| Q64424 | TGLLLLATARGNEVCYSHLG | Negative |
| Q64424 | SDEKPWAGTLQRPVKSLPAS | Negative |
| Q64424 | GLLLLATARGNEVCYSHLGC | Negative |
| Q64424 | EVCYSHLGCFSDEKPWAGTL | Negative |
| Q64424 | NEVCYSHLGCFSDEKPWAG  | Negative |
| Q64424 | ATARGNEVCYSHLGCFSDEK | Negative |
| Q64610 | ICLGFTASRIKRAEWDEGPP | Negative |
| Q64610 | SVNICLGFTASRIKRAEWDE | Negative |
| Q64610 | FTFAISVNICLGFTASRIKR | Negative |
| Q64610 | LGSFQVISLFTFAISVNICL | Negative |
| Q64610 | VISLFTFAISVNICLGFTAS | Negative |
| Q64610 | ISVNICLGFTASRIKRAEWD | Negative |
| Q64610 | AISVNICLGFTASRIKRAEW | Negative |
| Q64610 | CLGSFQVISLFTFAISVNIC | Negative |
| Q64610 | GFTASRIKRAEWDEGPPTVL | Negative |
| Q64610 | LGFTASRIKRAEWDEGPPTV | Negative |
| Q64610 | FQVISLFTFAISVNICLGFT | Negative |
| Q64610 | TFAISVNICLGFTASRIKRA | Negative |
| Q64610 | RQGCLGSFQVISLFTFAISV | Negative |
| Q64610 | LFTFAISVNICLGFTASRIK | Negative |
| Q64610 | ARQGCLGSFQVISLFTFAIS | Negative |
| Q64610 | QGCLGSFQVISLFTFAISVN | Negative |
| Q64610 | VNICLGFTASRIKRAEWDEG | Negative |
| Q64610 | QVISLFTFAISVNICLGFTA | Negative |
| Q64610 | ASRIKRAEWDEGPPTVLSDS | Negative |
| Q64610 | TASRIKRAEWDEGPPTVLSD | Negative |
| Q64610 | FAISVNICLGFTASRIKRAE | Negative |
| Q64610 | MARQGCLGSFQVISLFTFAI | Negative |
| Q64610 | SFQVISLFTFAISVNICLGF | Negative |
| Q64610 | NICLGFTASRIKRAEWDEGP | Negative |
| Q64610 | GCLGSFQVISLFTFAISVNI | Negative |
| Q64610 | GSFQVISLFTFAISVNICLG | Negative |
| Q64610 | FTASRIKRAEWDEGPPTVLS | Negative |

|        |                       |          |
|--------|-----------------------|----------|
| Q64610 | CLGFTASRIKRAEWDEGPPT  | Negative |
| Q64610 | SLFTFAISVNICLGFTASRI  | Negative |
| Q64HC7 | PYIGGGGGFNRRGGGFHRGGG | Negative |
| Q64HC7 | SFFVLCVALATAGHLGRPYI  | Negative |
| Q64HC7 | LCVALATAGHLGRPYIGGGG  | Negative |
| Q64HC7 | MKFFALFSFFVLCVALATAG  | Negative |
| Q64HC7 | TAGHLGRPYIGGGGGFNRRGG | Negative |
| Q64HC7 | GRPYIGGGGGFNRRGGGFHRG | Negative |
| Q64HC7 | LFSFFVLCVALATAGHLGRP  | Negative |
| Q64HC7 | ATAGHLGRPYIGGGGGFNRRG | Negative |
| Q64HC7 | LGRPYIGGGGGFNRRGGGFHR | Negative |
| Q64HC7 | ALATAGHLGRPYIGGGGGFN  | Negative |
| Q64HC7 | FFVLCVALATAGHLGRPYIG  | Negative |
| Q64HC7 | IGGGGGFNRRGGGFHRGGGFH | Negative |
| Q64HC7 | GGGFNRRGGGFHRGGGFHRGG | Negative |
| Q64HC7 | LATAGHLGRPYIGGGGGFNRR | Negative |
| Q64HC7 | VALATAGHLGRPYIGGGGGF  | Negative |
| Q64HC7 | YIGGGGGFNRRGGGFHRGGGF | Negative |
| Q64HC7 | FSFFVLCVALATAGHLGRPY  | Negative |
| Q64HC7 | KFFALFSFFVLCVALATAGH  | Negative |
| Q64HC7 | FVLCVALATAGHLGRPYIGG  | Negative |
| Q64HC7 | HLGRPYIGGGGGFNRRGGGFH | Negative |
| Q64HC7 | GGGGFNRRGGGFHRGGGFHR  | Negative |
| Q64HC7 | CVALATAGHLGRPYIGGGGG  | Negative |
| Q64HC7 | GGGGFNRRGGGFHRGGGFHRG | Negative |
| Q64HC7 | GHLGRPYIGGGGGFNRRGGGF | Negative |
| Q64HC7 | AGHLGRPYIGGGGGFNRRGGG | Negative |
| Q64HC7 | RPYIGGGGGFNRRGGGFHRGG | Negative |
| Q64HC7 | FALFSFFVLCVALATAGHLG  | Negative |
| Q64HC7 | VLCVALATAGHLGRPYIGGG  | Negative |
| Q64HC7 | FFALFSFFVLCVALATAGHL  | Negative |
| Q653V7 | APPARRLGALAVFLLALFLA  | Negative |
| Q653V7 | PPARRLGALAVFLLALFLAA  | Negative |
| Q653V7 | GSPPAPPARRLGALAVFLLA  | Negative |
| Q653V7 | AVFLLALFLAAPWGVDCGYN  | Negative |
| Q653V7 | MGSPAPPARRLGALAVFLL   | Negative |
| Q653V7 | LAAPWGVDCGYNVASVAGSK  | Negative |
| Q653V7 | WGVDCGYNVASVAGSKNRLR  | Negative |
| Q653V7 | RLGALAVFLLALFLAAPWGV  | Negative |
| Q653V7 | AAPWGVDCGYNVASVAGSKN  | Negative |
| Q653V7 | SPPAPPARRLGALAVFLLAL  | Negative |
| Q653V7 | ARRLGALAVFLLALFLAAPW  | Negative |
| Q653V7 | PAPPARRLGALAVFLLALFL  | Negative |
| Q653V7 | LALFLAAPWGVDCGYNVASV  | Negative |
| Q653V7 | ALAVFLLALFLAAPWGVDCG  | Negative |
| Q653V7 | MMGSPPAPPARRLGALAVFL  | Negative |



|        |                      |          |
|--------|----------------------|----------|
| Q653V7 | ALFLAAPWGVDCGYNVASVA | Negative |
| Q653V7 | GVDCGYNVASVAGSKNRLRA | Negative |
| Q653V7 | RRLGALAVFLLALFLAAPWG | Negative |
| Q653V7 | APWGVDCGYNVASVAGSKNR | Negative |
| Q653V7 | LGALAVFLLALFLAAPWGVD | Negative |
| Q653V7 | LAVFLLALFLAAPWGVDCGY | Negative |
| Q653V7 | GALAVFLLALFLAAPWGVDC | Negative |
| Q653V7 | PPAPPARRLGALAVFLLALF | Negative |
| Q653V7 | LLALFLAAPWGVDCGYNVAS | Negative |
| Q653V7 | LFLAAPWGVDCGYNVASVAG | Negative |
| Q653V7 | VFLLALFLAAPWGVDCGYNV | Negative |
| Q653V7 | PARRLGALAVFLLALFLAAP | Negative |
| Q653V7 | FLAAPWGVDCGYNVASVAGS | Negative |
| Q653V7 | PWGVDCGYNVASVAGSKNRL | Negative |
| Q696W1 | PPDSSPYRYFCYRVFKEQKN | Negative |
| Q696W1 | GRSISVSFGLLAVFLSLSGT | Negative |
| Q696W1 | TGAGLDCPPDSSPYRYFCYR | Negative |
| Q696W1 | SGTGAGLDCPPDSSPYRYFC | Negative |
| Q696W1 | GAGLDCPPDSSPYRYFCYRV | Negative |
| Q696W1 | PDSSPYRYFCYRVFKEQKNW | Negative |
| Q696W1 | LLAVFLSLSGTGAGLDCPPD | Negative |
| Q696W1 | AGLDCPPDSSPYRYFCYRVF | Negative |
| Q696W1 | FLSLSGTGAGLDCPPDSSPY | Negative |
| Q696W1 | AVFLSLSGTGAGLDCPPDSS | Negative |
| Q696W1 | DCPPDSSPYRYFCYRVFKEQ | Negative |
| Q696W1 | SISVSFGLLAVFLSLSGTGA | Negative |
| Q696W1 | VFLSLSGTGAGLDCPPDSSP | Negative |
| Q696W1 | DSSPYRYFCYRVFKEQKNWA | Negative |
| Q696W1 | GTGAGLDCPPDSSPYRYFCY | Negative |
| Q696W1 | GLLAVFLSLSGTGAGLDCPP | Negative |
| Q696W1 | VSFGLLAVFLSLSGTGAGLD | Negative |
| Q696W1 | CPPDSSPYRYFCYRVFKEQK | Negative |
| Q696W1 | LAVFLSLSGTGAGLDCPPDS | Negative |
| Q696W1 | LSLSGTGAGLDCPPDSSPYR | Negative |
| Q696W1 | SFGLLAVFLSLSGTGAGLDC | Negative |
| Q696W1 | GLDCPPDSSPYRYFCYRVFK | Negative |
| Q696W1 | SVSFGLLAVFLSLSGTGAGL | Negative |
| Q696W1 | LSGTGAGLDCPPDSSPYRYF | Negative |
| Q696W1 | LDCPPDSSPYRYFCYRVFKE | Negative |
| Q696W1 | RSISVSFGLLAVFLSLSGTG | Negative |
| Q696W1 | MGRSISVSFGLLAVFLSLSG | Negative |
| Q696W1 | SLSGTGAGLDCPPDSSPYRY | Negative |
| Q696W1 | ISVSFGLLAVFLSLSGTGAG | Negative |
| Q69CK0 | LNTPLPLIYTTCPIGQDKCV | Negative |
| Q69CK0 | VCLDLGYTRKCLNTPLPLIY | Negative |
| Q69CK0 | YTRKCLNTPLPLIYTTCPIG | Negative |

|        |                       |          |
|--------|-----------------------|----------|
| Q69CK0 | TLLLTLVVVTIVCLDLGYTR  | Negative |
| Q69CK0 | TIVCLDLGYTRKCLNTPLPL  | Negative |
| Q69CK0 | NTPLPLIYTTCPIGQDKCVK  | Negative |
| Q69CK0 | TRKCLNTPLPLIYTTCPIGQ  | Negative |
| Q69CK0 | TPLPLIYTTCPIGQDKCVKM  | Negative |
| Q69CK0 | CLDLGYTRKCLNTPLPLIYT  | Negative |
| Q69CK0 | KCLNTPLPLIYTTCPIGQDK  | Negative |
| Q69CK0 | KTLLLTLVVVTIVCLDLGYT  | Negative |
| Q69CK0 | GYTRKCLNTPLPLIYTTCPI  | Negative |
| Q69CK0 | LDLGYTRKCLNTPLPLIYTT  | Negative |
| Q69CK0 | LPLIYTTCPIGQDKCVKMTI  | Negative |
| Q69CK0 | MKTLTLLTLVVVTIVCLDLGY | Negative |
| Q69CK0 | RKCLNTPLPLIYTTCPIGQD  | Negative |
| Q69CK0 | VTIVCLDLGYTRKCLNTPLP  | Negative |
| Q69CK0 | CLNTPLPLIYTTCPIGQDKC  | Negative |
| Q69CK0 | DLGYTRKCLNTPLPLIYTTTC | Negative |
| Q69CK0 | LLLTLVVVTIVCLDLGYTRK  | Negative |
| Q69CK0 | LGYTRKCLNTPLPLIYTTCP  | Negative |
| Q69CK0 | IVCLDLGYTRKCLNTPLPLI  | Negative |
| Q69CK0 | PLPLIYTTCPIGQDKCVKMT  | Negative |
| Q69CK0 | VVVTIVCLDLGYTRKCLNTP  | Negative |
| Q69CK0 | PLIYTTCPIGQDKCVKMTIK  | Negative |
| Q69CK0 | LLTLVVVTIVCLDLGYTRKC  | Negative |
| Q69CK0 | LTLVVVTIVCLDLGYTRKCL  | Negative |
| Q69CK0 | LVVVTIVCLDLGYTRKCLNT  | Negative |
| Q69CK0 | VVTIVCLDLGYTRKCLNTPL  | Negative |
| Q6ASY2 | AAVACLLVVGLAAVAGVDGA  | Negative |
| Q6ASY2 | VDGATASSPAPAPAVDCTAE  | Negative |
| Q6ASY2 | TASSPAPAPAVDCTAEALKL  | Negative |
| Q6ASY2 | GVDGATASSPAPAPAVDCTA  | Negative |
| Q6ASY2 | AAAVACLLVVGLAAVAGVDG  | Negative |
| Q6ASY2 | AVAGVDGATASSPAPAPAVD  | Negative |
| Q6ASY2 | SSPAPAPAVDCTAEALKLAD  | Negative |
| Q6ASY2 | VAARAAAVACLLVVGLAAVA  | Negative |
| Q6ASY2 | AVAARAAAVACLLVVGLAAV  | Negative |
| Q6ASY2 | ASSPAPAPAVDCTAEALKLA  | Negative |
| Q6ASY2 | LVVGLAAVAGVDGATASSPA  | Negative |
| Q6ASY2 | RAAAVACLLVVGLAAVAGVD  | Negative |
| Q6ASY2 | VGLAAVAGVDGATASSPAPA  | Negative |
| Q6ASY2 | ATASSPAPAPAVDCTAEALK  | Negative |
| Q6ASY2 | GATASSPAPAPAVDCTAEAL  | Negative |
| Q6ASY2 | AAVAGVDGATASSPAPAPAV  | Negative |
| Q6ASY2 | MAVAARAAAVACLLVVGLAA  | Negative |
| Q6ASY2 | ACLLVVGLAAVAGVDGATAS  | Negative |
| Q6ASY2 | AVACLLVVGLAAVAGVDGAT  | Negative |
| Q6ASY2 | GLAAVAGVDGATASSPAPAP  | Negative |

|        |                      |          |
|--------|----------------------|----------|
| Q6ASY2 | DGATASSPAPAPAVDCTAEA | Negative |
| Q6ASY2 | ARAAAVACLLVVGLAAVAGV | Negative |
| Q6ASY2 | LAAVAGVDGATASSPAPAPA | Negative |
| Q6ASY2 | AARAAAVACLLVVGLAAVAG | Negative |
| Q6ASY2 | VVGLAAVAGVDGATASSPAP | Negative |
| Q6ASY2 | AGVDGATASSPAPAPAVDCT | Negative |
| Q6ASY2 | VAGVDGATASSPAPAPAVDC | Negative |
| Q6ASY2 | VACLLVVGLAAVAGVDGATA | Negative |
| Q6ASY2 | LLVVGLAAVAGVDGATASSP | Negative |
| Q6E0U4 | EESTGTNIGEALGHGLGDAL | Negative |
| Q6E0U4 | STGTNIGEALGHGLGDALSE | Negative |
| Q6E0U4 | GPLQSGEESTGTNIGEALGH | Negative |
| Q6E0U4 | ESTGTNIGEALGHGLGDALS | Negative |
| Q6E0U4 | LCLGSGEAGPLQSGEESTGT | Negative |
| Q6E0U4 | CLGSGEAGPLQSGEESTGTN | Negative |
| Q6E0U4 | CLLLALCLGSGEAGPLQSGE | Negative |
| Q6E0U4 | GPLACLLALCLGSGEAGPL  | Negative |
| Q6E0U4 | GSGEAGPLQSGEESTGTNIG | Negative |
| Q6E0U4 | PLACLLALCLGSGEAGPLQ  | Negative |
| Q6E0U4 | GEESTGTNIGEALGHGLGDA | Negative |
| Q6E0U4 | SGEAGPLQSGEESTGTNIGE | Negative |
| Q6E0U4 | KFQGPLACLLALCLGSGEA  | Negative |
| Q6E0U4 | SGEESTGTNIGEALGHGLGD | Negative |
| Q6E0U4 | ALCLGSGEAGPLQSGEESTG | Negative |
| Q6E0U4 | LLLALCLGSGEAGPLQSGEE | Negative |
| Q6E0U4 | FQGPLACLLALCLGSGEAG  | Negative |
| Q6E0U4 | QSGEESTGTNIGEALGHGLG | Negative |
| Q6E0U4 | AGPLQSGEESTGTNIGEALG | Negative |
| Q6E0U4 | MKFQGPLACLLALCLGSGE  | Negative |
| Q6E0U4 | PLQSGEESTGTNIGEALGHG | Negative |
| Q6E0U4 | LALCLGSGEAGPLQSGEEST | Negative |
| Q6E0U4 | ACLLALCLGSGEAGPLQSG  | Negative |
| Q6E0U4 | EAGPLQSGEESTGTNIGEAL | Negative |
| Q6E0U4 | LGSGEAGPLQSGEESTGTNI | Negative |
| Q6E0U4 | QGPLACLLALCLGSGEAGP  | Negative |
| Q6E0U4 | LQSGEESTGTNIGEALGHGL | Negative |
| Q6E0U4 | GEAGPLQSGEESTGTNIGEA | Negative |
| Q6E0U4 | LLALCLGSGEAGPLQSGEES | Negative |
| Q6EER2 | GNLLQFNKMIKFETNKNAIP | Negative |
| Q6EER2 | NKMIKFETNKNAIPFYAFYG | Negative |
| Q6EER2 | ETNKNAIPFYAFYGCYCGWG | Negative |
| Q6EER2 | VLLVGVEGNLLQFNKMIKFE | Negative |
| Q6EER2 | MIKFETNKNAIPFYAFYGCY | Negative |
| Q6EER2 | TNKNAIPFYAFYGCYCGWGG | Negative |
| Q6EER2 | VGVEGNLLQFNKMIKFETNK | Negative |
| Q6EER2 | FNKMIKFETNKNAIPFYAFY | Negative |

|        |                      |          |
|--------|----------------------|----------|
| Q6EER2 | IKFETNKNAIPFYAFYGCYC | Negative |
| Q6EER2 | LLVGVEGNLLQFNKMIKFET | Negative |
| Q6EER2 | VEGNLLQFNKMIKFETNKNA | Negative |
| Q6EER2 | VAVLLVGVEGNLLQFNKMIK | Negative |
| Q6EER2 | EGNLLQFNKMIKFETNKNAI | Negative |
| Q6EER2 | NLLQFNKMIKFETNKNAIPF | Negative |
| Q6EER2 | LWIVAVLLVGVEGNLLQFNK | Negative |
| Q6EER2 | KMIKFETNKNAIPFYAFYGC | Negative |
| Q6EER2 | GVEGNLLQFNKMIKFETNKN | Negative |
| Q6EER2 | LLQFNKMIKFETNKNAIPFY | Negative |
| Q6EER2 | LVGVEGNLLQFNKMIKFETN | Negative |
| Q6EER2 | FETNKNAIPFYAFYGCYCGW | Negative |
| Q6EER2 | ALWIVAVLLVGVEGNLLQFN | Negative |
| Q6EER2 | MRALWIVAVLLVGVEGNLLQ | Negative |
| Q6EER2 | NKNAIPFYAFYGCYCGWGGR | Negative |
| Q6EER2 | WIVAVLLVGVEGNLLQFNKM | Negative |
| Q6EER2 | KFETNKNAIPFYAFYGCYCG | Negative |
| Q6EER2 | AVLLVGVEGNLLQFNKMIKF | Negative |
| Q6EER2 | IVAVLLVGVEGNLLQFNKMI | Negative |
| Q6EER2 | QFNKMIKFETNKNAIPFYAF | Negative |
| Q6EER2 | LQFNKMIKFETNKNAIPFYA | Negative |
| Q6EER4 | VGVEGNLLQFNKMIKIMTRK | Negative |
| Q6EER4 | LLVGVEGNLLQFNKMIKIMT | Negative |
| Q6EER4 | NKMIKIMTRKNGIPYYSSYG | Negative |
| Q6EER4 | VAVLLVGVEGNLLQFNKMIK | Negative |
| Q6EER4 | KIMTRKNGIPYYSSYGCYCG | Negative |
| Q6EER4 | IKIMTRKNGIPYYSSYGCYC | Negative |
| Q6EER4 | QFNKMIKIMTRKNGIPYYSS | Negative |
| Q6EER4 | LVGVEGNLLQFNKMIKIMTR | Negative |
| Q6EER4 | LLQFNKMIKIMTRKNGIPYY | Negative |
| Q6EER4 | IMTRKNGIPYYSSYGCYCGW | Negative |
| Q6EER4 | MIKIMTRKNGIPYYSSYGCY | Negative |
| Q6EER4 | GVEGNLLQFNKMIKIMTRKN | Negative |
| Q6EER4 | EGNLLQFNKMIKIMTRKNGI | Negative |
| Q6EER4 | NLLQFNKMIKIMTRKNGIPY | Negative |
| Q6EER4 | VEGNLLQFNKMIKIMTRKNG | Negative |
| Q6EER4 | IVAVLLVGVEGNLLQFNKMI | Negative |
| Q6EER4 | WIVAVLLVGVEGNLLQFNKM | Negative |
| Q6EER4 | VLLVGVEGNLLQFNKMIKIM | Negative |
| Q6EER4 | MRTLWIVAVLLVGVEGNLLQ | Negative |
| Q6EER4 | MTRKNGIPYYSSYGCYCGWG | Negative |
| Q6EER4 | KMIKIMTRKNGIPYYSSYGC | Negative |
| Q6EER4 | RKNGIPYYSSYGCYCGWGGQ | Negative |
| Q6EER4 | TRKNGIPYYSSYGCYCGWGG | Negative |
| Q6EER4 | LWIVAVLLVGVEGNLLQFNK | Negative |
| Q6EER4 | FNKMIKIMTRKNGIPYYSSY | Negative |

|        |                       |          |
|--------|-----------------------|----------|
| Q6EER4 | AVLLVGVEGNLLQFNKMIKI  | Negative |
| Q6EER4 | LQFNKMIKIMTRKNGIPYYS  | Negative |
| Q6EER4 | TLWIVAVLLVGVEGNLLQFN  | Negative |
| Q6EER4 | GNLLQFNKMIKIMTRKNGIP  | Negative |
| Q6EH50 | TSTWAVNTIIYNVGSTTISK  | Negative |
| Q6EH50 | LAPTSTWAVNTIIYNVGSTT  | Negative |
| Q6EH50 | VWLILAPTSTWAVNTIIYNV  | Negative |
| Q6EH50 | NVGSTTISKYATFLDDLNE   | Negative |
| Q6EH50 | LVVTISVWLILAPTSTWAVN  | Negative |
| Q6EH50 | TWAVNTIIYNVGSTTISKYA  | Negative |
| Q6EH50 | WLILAPTSTWAVNTIIYNVG  | Negative |
| Q6EH50 | VTISVWLILAPTSTWAVNTI  | Negative |
| Q6EH50 | KSMLVVTISVWLILAPTSTW  | Negative |
| Q6EH50 | LILAPTSTWAVNTIIYNVGS  | Negative |
| Q6EH50 | SMLVVTISVWLILAPTSTWA  | Negative |
| Q6EH50 | SVWLILAPTSTWAVNTIIYN  | Negative |
| Q6EH50 | IYNVGSTTISKYATFLDDL   | Negative |
| Q6EH50 | ILAPTSTWAVNTIIYNVGST  | Negative |
| Q6EH50 | TIIYNVGSTTISKYATFLDD  | Negative |
| Q6EH50 | AVNTIIYNVGSTTISKYATF  | Negative |
| Q6EH50 | IIYNVGSTTISKYATFLDDL  | Negative |
| Q6EH50 | VVTISVWLILAPTSTWAVNT  | Negative |
| Q6EH50 | ISVWLILAPTSTWAVNTIIY  | Negative |
| Q6EH50 | MLVVTISVWLILAPTSTWAV  | Negative |
| Q6EH50 | APTSTWAVNTIIYNVGSTTI  | Negative |
| Q6EH50 | YNVGSTTISKYATFLDDL    | Negative |
| Q6EH50 | PTSTWAVNTIIYNVGSTTIS  | Negative |
| Q6EH50 | NTIIYNVGSTTISKYATFLD  | Negative |
| Q6EH50 | VNTIIYNVGSTTISKYATFL  | Negative |
| Q6EH50 | VGSTTISKYATFLDDLNEA   | Negative |
| Q6EH50 | STWAVNTIIYNVGSTTISKY  | Negative |
| Q6EH50 | WAVNTIIYNVGSTTISKYAT  | Negative |
| Q6EH50 | MKSMLVVTISVWLILAPTST  | Negative |
| Q6F3I7 | VATALPAHA EKLTLEAITGS | Negative |
| Q6F3I7 | MRLALFALFALMTVATALPA  | Negative |
| Q6F3I7 | LALFALFALMTVATALPAHA  | Negative |
| Q6F3I7 | RLALFALFALMTVATALPAH  | Negative |
| Q6F3I7 | ALFALMTVATALPAHA EKLT | Negative |
| Q6F3I7 | EAITGSAPLSGPTLT KPQIA | Negative |
| Q6F3I7 | LPAHA EKLTLEAITGSAPLS | Negative |
| Q6F3I7 | AITGSAPLSGPTLT KPQIAP | Negative |
| Q6F3I7 | LFALFALMTVATALPAHA EK | Negative |
| Q6F3I7 | LEAITGSAPLSGPTLT KPQI | Negative |
| Q6F3I7 | ALMTVATALPAHA EKLTLEA | Negative |
| Q6F3I7 | TLEAITGSAPLSGPTLT KPQ | Negative |
| Q6F3I7 | ALFALFALMTVATALPAHA E | Negative |

|        |                       |          |
|--------|-----------------------|----------|
| Q6F3I7 | KLTLEAITGSAPLSGPTLTK  | Negative |
| Q6F3I7 | EKLTLEAITGSAPLSGPTLT  | Negative |
| Q6F3I7 | TVATALPAHAEKLTLEAITG  | Negative |
| Q6F3I7 | AHAEKLTLEAITGSAPLSGP  | Negative |
| Q6F3I7 | FALMTVATALPAHAEKLTLE  | Negative |
| Q6F3I7 | ATALPAHAEKLTLEAITGSA  | Negative |
| Q6F3I7 | PAHAEKLTLEAITGSAPLSG  | Negative |
| Q6F3I7 | ITGSAPLSGPTLTKPQIAPD  | Negative |
| Q6F3I7 | HAEKLTLEAITGSAPLSGPT  | Negative |
| Q6F3I7 | AEKLTLEAITGSAPLSGPTL  | Negative |
| Q6F3I7 | LTLEAITGSAPLSGPTLTKP  | Negative |
| Q6F3I7 | FALFALMTVATALPAHAEKL  | Negative |
| Q6F3I7 | MTVATALPAHAEKLTLEAIT  | Negative |
| Q6F3I7 | LMTVATALPAHAEKLTLEAI  | Negative |
| Q6F3I7 | TALPAHAEKLTLEAITGSAP  | Negative |
| Q6F3I7 | ALPAHAEKLTLEAITGSAPL  | Negative |
| Q6F495 | AKFLLTILVTFAAVASLGMA  | Negative |
| Q6F495 | SGQTLYAGHSLTSGSYTLTI  | Negative |
| Q6F495 | VTFAAVASLGMADSVLLSGQ  | Negative |
| Q6F495 | VASLGMADSVLLSGQTLYAG  | Negative |
| Q6F495 | DSVLLSGQTLYAGHSLTSGS  | Negative |
| Q6F495 | QTLYAGHSLTSGSYTLTIQN  | Negative |
| Q6F495 | AVASLGMADSVLLSGQTLYA  | Negative |
| Q6F495 | GQTLYAGHSLTSGSYTLTIQ  | Negative |
| Q6F495 | LTILVTFAAVASLGMADSVL  | Negative |
| Q6F495 | LGMADSVLLSGQTLYAGHSL  | Negative |
| Q6F495 | SLGMADSVLLSGQTLYAGHS  | Negative |
| Q6F495 | ASLGMADSVLLSGQTLYAGH  | Negative |
| Q6F495 | FAAVASLGMADSVLLSGQTL  | Negative |
| Q6F495 | ADSVLLSGQTLYAGHSLTSG  | Negative |
| Q6F495 | MADSVLLSGQTLYAGHSLTS  | Negative |
| Q6F495 | LLTILVTFAAVASLGMADSV  | Negative |
| Q6F495 | SVLLSGQTLYAGHSLTSGSY  | Negative |
| Q6F495 | AAVASLGMADSVLLSGQTLY  | Negative |
| Q6F495 | FLLTILVTFAAVASLGMADS  | Negative |
| Q6F495 | LLSGQTLYAGHSLTSGSYTL  | Negative |
| Q6F495 | KFLLTILVTFAAVASLGMAD  | Negative |
| Q6F495 | GMADSVLLSGQTLYAGHSLT  | Negative |
| Q6F495 | VLLSGQTLYAGHSLTSGSYT  | Negative |
| Q6F495 | MAAKFLLTILVTFAAVASLG  | Negative |
| Q6F495 | LVTFAAVASLGMADSVLLSG  | Negative |
| Q6F495 | ILVTFAAVASLGMADSVLLS  | Negative |
| Q6F495 | AAKFLLTILVTFAAVASLGM  | Negative |
| Q6F495 | TFAAVASLGMADSVLLSGQT  | Negative |
| Q6F495 | LSGQTLYAGHSLTSGSYTLT  | Negative |
| Q6F4C6 | GFFGGDDDNNGYFGYFPRFSY | Negative |

|        |                        |          |
|--------|------------------------|----------|
| Q6F4C6 | LLALAACASAQYFFRGGDDD   | Negative |
| Q6F4C6 | SAQYFFRGGDDDNNGFFGGDD  | Negative |
| Q6F4C6 | YFFRGGDDDNNGFFGGDDDN   | Negative |
| Q6F4C6 | ASAQYFFRGGDDDNNGFFGGD  | Negative |
| Q6F4C6 | LVLLALAACASAQYFFRGGD   | Negative |
| Q6F4C6 | LAACASAQYFFRGGDDDN     | Negative |
| Q6F4C6 | FRGGDDDNNGFFGGDDDN     | Negative |
| Q6F4C6 | ALAACASAQYFFRGGDDDN    | Negative |
| Q6F4C6 | ACASAQYFFRGGDDDNNGFFG  | Negative |
| Q6F4C6 | QYFFRGGDDDNNGFFGGDDDN  | Negative |
| Q6F4C6 | LLVLLALAACASAQYFFRGG   | Negative |
| Q6F4C6 | AACASAQYFFRGGDDDNNGFF  | Negative |
| Q6F4C6 | FFGGDDDNNGYFGYFPRFSYP  | Negative |
| Q6F4C6 | DDNNGFFGGDDDNNGYFGYFPR | Negative |
| Q6F4C6 | LALAACASAQYFFRGGDDDN   | Negative |
| Q6F4C6 | SLLVLLALAACASAQYFFRG   | Negative |
| Q6F4C6 | GDDDNNGFFGGDDDNNGYFGYF | Negative |
| Q6F4C6 | MRSLLVLLALAACASAQYFF   | Negative |
| Q6F4C6 | DNNGFFGGDDDNNGYFGYFPRF | Negative |
| Q6F4C6 | FGGDDDNNGYFGYFPRFSYPI  | Negative |
| Q6F4C6 | NGFFGGDDDNNGYFGYFPRFS  | Negative |
| Q6F4C6 | AQYFFRGGDDDNNGFFGGDD   | Negative |
| Q6F4C6 | DDDNNGFFGGDDDNNGYFGYFP | Negative |
| Q6F4C6 | VLLALAACASAQYFFRGGDD   | Negative |
| Q6F4C6 | GGDDDNNGFFGGDDDNNGYFGY | Negative |
| Q6F4C6 | RGGDDDNNGFFGGDDDNNGYFG | Negative |
| Q6F4C6 | FFRGGDDDNNGFFGGDDDN    | Negative |
| Q6F4C6 | CASAQYFFRGGDDDNNGFFGG  | Negative |
| Q6GU94 | AIVVLLILALILCLYAMTTV   | Negative |
| Q6GU94 | TTVEGACQFWSCNSSCISRG   | Negative |
| Q6GU94 | IVVLLILALILCLYAMTTVE   | Negative |
| Q6GU94 | QFWSCNSSCISRGYRQGYCW   | Negative |
| Q6GU94 | LILCLYAMTTVEGACQFWSC   | Negative |
| Q6GU94 | ALILCLYAMTTVEGACQFWS   | Negative |
| Q6GU94 | VEGACQFWSCNSSCISRGYR   | Negative |
| Q6GU94 | ILALILCLYAMTTVEGACQF   | Negative |
| Q6GU94 | MKAIVVLLILALILCLYAMT   | Negative |
| Q6GU94 | GACQFWSCNSSCISRGYRQG   | Negative |
| Q6GU94 | SCNSSCISRGYRQGYCWGIQ   | Negative |
| Q6GU94 | TVEGACQFWSCNSSCISRGY   | Negative |
| Q6GU94 | AMTTVEGACQFWSCNSSCIS   | Negative |
| Q6GU94 | ACQFWSCNSSCISRGYRQGY   | Negative |
| Q6GU94 | CLYAMTTVEGACQFWSCNSS   | Negative |
| Q6GU94 | LLILALILCLYAMTTVEGAC   | Negative |
| Q6GU94 | ILCLYAMTTVEGACQFWSCN   | Negative |
| Q6GU94 | EGACQFWSCNSSCISRGYRQ   | Negative |

|        |                      |          |
|--------|----------------------|----------|
| Q6GU94 | KAIVVLLILALILCLYAMTT | Negative |
| Q6GU94 | LILALILCLYAMTTVEGACQ | Negative |
| Q6GU94 | LYAMTTVEGACQFWSCNSSC | Negative |
| Q6GU94 | CQFWSCNSSCISRGYRQGYC | Negative |
| Q6GU94 | LCLYAMTTVEGACQFWSCNS | Negative |
| Q6GU94 | WSCNSSCISRGYRQGYCWGI | Negative |
| Q6GU94 | MTTVEGACQFWSCNSSCISR | Negative |
| Q6GU94 | FWSCNSSCISRGYRQGYCWG | Negative |
| Q6GU94 | YAMTTVEGACQFWSCNSSCI | Negative |
| Q6GU94 | VLLILALILCLYAMTTVEGA | Negative |
| Q6GU94 | VVLLILALILCLYAMTTVEG | Negative |
| Q6H3C7 | VEGHLLQFETMIIKMTKQTG | Negative |
| Q6H3C7 | AVLLVGVEGHLLQFETMIIK | Negative |
| Q6H3C7 | FETMIIKMTKQTGLFSYSFY | Negative |
| Q6H3C7 | LWILAVLLVGVEGHLLQFET | Negative |
| Q6H3C7 | VLLVGVEGHLLQFETMIIKM | Negative |
| Q6H3C7 | LQFETMIIKMTKQTGLFSYS | Negative |
| Q6H3C7 | TKQTGLFSYSFYGCYCGWGG | Negative |
| Q6H3C7 | HLLQFETMIIKMTKQTGLFS | Negative |
| Q6H3C7 | GHLLQFETMIIKMTKQTGLF | Negative |
| Q6H3C7 | KMTKQTGLFSYSFYGCYCGW | Negative |
| Q6H3C7 | VGVEGHLLQFETMIIKMTKQ | Negative |
| Q6H3C7 | IKMTKQTGLFSYSFYGCYCG | Negative |
| Q6H3C7 | LAVLLVGVEGHLLQFETMII | Negative |
| Q6H3C7 | MRTLWILAVLLVGVEGHLLQ | Negative |
| Q6H3C7 | LLQFETMIIKMTKQTGLFSY | Negative |
| Q6H3C7 | KQTGLFSYSFYGCYCGWGGH | Negative |
| Q6H3C7 | TMIIKMTKQTGLFSYSFYGC | Negative |
| Q6H3C7 | EGHLLQFETMIIKMTKQTGL | Negative |
| Q6H3C7 | MTKQTGLFSYSFYGCYCGWG | Negative |
| Q6H3C7 | MIIKMTKQTGLFSYSFYGCY | Negative |
| Q6H3C7 | LLVGVEGHLLQFETMIIKMT | Negative |
| Q6H3C7 | WILAVLLVGVEGHLLQFETM | Negative |
| Q6H3C7 | IIMTKQTGLFSYSFYGCYC  | Negative |
| Q6H3C7 | ILAVLLVGVEGHLLQFETMI | Negative |
| Q6H3C7 | ETMIIKMTKQTGLFSYSFYG | Negative |
| Q6H3C7 | GVEGHLLQFETMIIKMTKQT | Negative |
| Q6H3C7 | LVGVEGHLLQFETMIIKMTK | Negative |
| Q6H3C7 | QFETMIIKMTKQTGLFSYSF | Negative |
| Q6H3C7 | TLWILAVLLVGVEGHLLQFE | Negative |
| Q6H3C8 | LWIMAVLLLGVGHLMQFEN  | Negative |
| Q6H3C8 | LGVEGHLMQFENMIKKVTGR | Negative |
| Q6H3C8 | WIMAVLLLGVGHLMQFENM  | Negative |
| Q6H3C8 | LLGVGHLMQFENMIKKVTG  | Negative |
| Q6H3C8 | LLGVGHLMQFENMIKKVT   | Negative |
| Q6H3C8 | FENMIKKVTGRSGIWWYGSY | Negative |



|        |                      |          |
|--------|----------------------|----------|
| Q6H3C8 | GHLMQFENMIKKVTGRSGIW | Negative |
| Q6H3C8 | MQFENMIKKVTGRSGIWWYG | Negative |
| Q6H3C8 | VTGRSGIWWYGSYGCYCGKG | Negative |
| Q6H3C8 | GRSGIWWYGSYGCYCGKGGQ | Negative |
| Q6H3C8 | HLMQFENMIKKVTGRSGIWW | Negative |
| Q6H3C8 | IKKVTGRSGIWWYGSYGCYC | Negative |
| Q6H3C8 | VLLLGVEGHLMQFENMIKKV | Negative |
| Q6H3C8 | VEGHLMQFENMIKKVTGRSG | Negative |
| Q6H3C8 | LMQFENMIKKVTGRSGIWWY | Negative |
| Q6H3C8 | TGRSGIWWYGSYGCYCGKGG | Negative |
| Q6H3C8 | EGHLMQFENMIKKVTGRSGI | Negative |
| Q6H3C8 | IMAVLLLGVEGHLMQFENMI | Negative |
| Q6H3C8 | NMIKKVTGRSGIWWYGSYGC | Negative |
| Q6H3C8 | ALWIMAVLLLGVEGHLMQFE | Negative |
| Q6H3C8 | AVLLLGVEGHLMQFENMIKK | Negative |
| Q6H3C8 | MRALWIMAVLLLGVEGHLMQ | Negative |
| Q6H3C8 | KKVTGRSGIWWYGSYGCYCG | Negative |
| Q6H3C8 | MIKKVTGRSGIWWYGSYGCY | Negative |
| Q6H3C8 | GVEGHLMQFENMIKKVTGRS | Negative |
| Q6H3C8 | KVTGRSGIWWYGSYGCYCGK | Negative |
| Q6H3C8 | MAVLLLGVEGHLMQFENMIK | Negative |
| Q6H3C8 | QFENMIKKVTGRSGIWWYGS | Negative |
| Q6H3C8 | ENMIKKVTGRSGIWWYGSYG | Negative |
| Q6H3D0 | KVAGRSGVWYYGSYGCFCGA | Negative |
| Q6H3D0 | HLMQFETLIMKVAGRSGVWY | Negative |
| Q6H3D0 | MKVAGRSGVWYYGSYGCFCG | Negative |
| Q6H3D0 | AVLQVGVEGHLMQFETLIMK | Negative |
| Q6H3D0 | GHLMQFETLIMKVAGRSGVW | Negative |
| Q6H3D0 | MAVLQVGVEGHLMQFETLIM | Negative |
| Q6H3D0 | ETLIMKVAGRSGVWYYGSYG | Negative |
| Q6H3D0 | TLIMKVAGRSGVWYYGSYGC | Negative |
| Q6H3D0 | GVEGHLMQFETLIMKVAGRS | Negative |
| Q6H3D0 | IMAVLQVGVEGHLMQFETLI | Negative |
| Q6H3D0 | LIMKVAGRSGVWYYGSYGCF | Negative |
| Q6H3D0 | QVGVEGHLMQFETLIMKVAG | Negative |
| Q6H3D0 | EGHLMQFETLIMKVAGRSGV | Negative |
| Q6H3D0 | VEGHLMQFETLIMKVAGRSG | Negative |
| Q6H3D0 | LMQFETLIMKVAGRSGVWYY | Negative |
| Q6H3D0 | MRTLWIMAVLQVGVEGHLMQ | Negative |
| Q6H3D0 | AGRSGVWYYGSYGCFCGAGG | Negative |
| Q6H3D0 | TLWIMAVLQVGVEGHLMQFE | Negative |
| Q6H3D0 | IMKVAGRSGVWYYGSYGCFC | Negative |
| Q6H3D0 | WIMAVLQVGVEGHLMQFETL | Negative |
| Q6H3D0 | LQVGVEGHLMQFETLIMKVA | Negative |
| Q6H3D0 | VAGRSGVWYYGSYGCFCGAG | Negative |
| Q6H3D0 | QFETLIMKVAGRSGVWYYGS | Negative |

|        |                      |          |
|--------|----------------------|----------|
| Q6H3D0 | LWIMAVLQVGVEGHLMQFET | Negative |
| Q6H3D0 | GRSGVWYYGSYGCFCGAGGQ | Negative |
| Q6H3D0 | FETLIMKVAGRSGVWYYGSY | Negative |
| Q6H3D0 | VGVEGHLMQFETLIMKVAGR | Negative |
| Q6H3D0 | VLQVGVEGHLMQFETLIMKV | Negative |
| Q6H3D0 | MQFETLIMKVAGRSGVWYYG | Negative |
| Q6H3D2 | LTKMFVQEMGKNALTSYSLY | Negative |
| Q6H3D2 | LLVGVEGGVIELTKMFVQEM | Negative |
| Q6H3D2 | MRTLWIMAVLLVGVEGGVIE | Negative |
| Q6H3D2 | EMGKNALTSYSLYGCNCGPG | Negative |
| Q6H3D2 | GGVIELTKMFVQEMGKNALT | Negative |
| Q6H3D2 | EGGVIELTKMFVQEMGKNAL | Negative |
| Q6H3D2 | LVGVEGGVIELTKMFVQEMG | Negative |
| Q6H3D2 | GKNALTSYSLYGCNCGPGGR | Negative |
| Q6H3D2 | GVEGGVIELTKMFVQEMGKN | Negative |
| Q6H3D2 | FVQEMGKNALTSYSLYGCNC | Negative |
| Q6H3D2 | LWIMAVLLVGVEGGVIELTK | Negative |
| Q6H3D2 | TLWIMAVLLVGVEGGVIELT | Negative |
| Q6H3D2 | MAVLLVGVEGGVIELTKMFV | Negative |
| Q6H3D2 | IELTKMFVQEMGKNALTSYS | Negative |
| Q6H3D2 | VQEMGKNALTSYSLYGCNCG | Negative |
| Q6H3D2 | VEGGVIELTKMFVQEMGKNA | Negative |
| Q6H3D2 | VGVEGGVIELTKMFVQEMGK | Negative |
| Q6H3D2 | MFVQEMGKNALTSYSLYGCN | Negative |
| Q6H3D2 | GVELTKMFVQEMGKNALTS  | Negative |
| Q6H3D2 | IMAVLLVGVEGGVIELTKMF | Negative |
| Q6H3D2 | WIMAVLLVGVEGGVIELTKM | Negative |
| Q6H3D2 | MGKNALTSYSLYGCNCGPGG | Negative |
| Q6H3D2 | VIELTKMFVQEMGKNALTSY | Negative |
| Q6H3D2 | AVLLVGVEGGVIELTKMFVQ | Negative |
| Q6H3D2 | TKMFVQEMGKNALTSYSLYG | Negative |
| Q6H3D2 | VLLVGVEGGVIELTKMFVQE | Negative |
| Q6H3D2 | QEMGKNALTSYSLYGCNCGP | Negative |
| Q6H3D2 | KMFVQEMGKNALTSYSLYGC | Negative |
| Q6H3D2 | ELTKMFVQEMGKNALTSYSL | Negative |
| Q6H3D3 | MRTLWIMAVLLLGVESVIE  | Negative |
| Q6H3D3 | GSVIELGKMIFQETGKNPAT | Negative |
| Q6H3D3 | EGSVIELGKMIFQETGKNPA | Negative |
| Q6H3D3 | GKNPATSYGLYGCNCGPGGR | Negative |
| Q6H3D3 | IELGKMIFQETGKNPATSYG | Negative |
| Q6H3D3 | SVIELGKMIFQETGKNPATS | Negative |
| Q6H3D3 | IFQETGKNPATSYGLYGCNC | Negative |
| Q6H3D3 | GKMIFQETGKNPATSYGLYG | Negative |
| Q6H3D3 | WIMAVLLLGVESVIELGKM  | Negative |
| Q6H3D3 | GVEGSVIELGKMIFQETGKN | Negative |
| Q6H3D3 | MAVLLLGVESVIELGKMIF  | Negative |

|        |                      |          |
|--------|----------------------|----------|
| Q6H3D3 | FQETGKNPATSYGLYGCNCG | Negative |
| Q6H3D3 | QETGKNPATSYGLYGCNCGP | Negative |
| Q6H3D3 | LLLGVEGSVIELGKMIFQET | Negative |
| Q6H3D3 | MIFQETGKNPATSYGLYGCN | Negative |
| Q6H3D3 | LLGVEGSVIELGKMIFQETG | Negative |
| Q6H3D3 | VIELGKMIFQETGKNPATSY | Negative |
| Q6H3D3 | LGVEGSVIELGKMIFQETGK | Negative |
| Q6H3D3 | LGKMIFQETGKNPATSYGLY | Negative |
| Q6H3D3 | TGKNPATSYGLYGCNCGPGG | Negative |
| Q6H3D3 | LWIMAVLLLGVEGSVIELGK | Negative |
| Q6H3D3 | ETGKNPATSYGLYGCNCGPG | Negative |
| Q6H3D3 | VEGSVIELGKMIFQETGKNP | Negative |
| Q6H3D3 | AVLLLGVEGSVIELGKMIFQ | Negative |
| Q6H3D3 | VLLLGVEGSVIELGKMIFQE | Negative |
| Q6H3D3 | ELGKMIFQETGKNPATSYGL | Negative |
| Q6H3D3 | KMIFQETGKNPATSYGLYGC | Negative |
| Q6H3D3 | IMAVLLLGVEGSVIELGKMI | Negative |
| Q6H3D3 | TLWIMAVLLLGVEGSVIELG | Negative |
| Q6H3D5 | VVEGSLVQLGKMIFQETGKN | Negative |
| Q6H3D5 | QLGKMIFQETGKNPATSYGL | Negative |
| Q6H3D5 | MAVLLVVVEGSLVQLGKMIF | Negative |
| Q6H3D5 | MRTLWIMAVLLVVVEGSLVQ | Negative |
| Q6H3D5 | LVVVEGSLVQLGKMIFQETG | Negative |
| Q6H3D5 | ETGKNPATSYGLYGCNCGPG | Negative |
| Q6H3D5 | QETGKNPATSYGLYGCNCGP | Negative |
| Q6H3D5 | VLLVVVEGSLVQLGKMIFQE | Negative |
| Q6H3D5 | VVVEGSLVQLGKMIFQETGK | Negative |
| Q6H3D5 | IMAVLLVVVEGSLVQLGKMI | Negative |
| Q6H3D5 | AVLLVVVEGSLVQLGKMIFQ | Negative |
| Q6H3D5 | GKMIFQETGKNPATSYGLYG | Negative |
| Q6H3D5 | EGSLVQLGKMIFQETGKNPA | Negative |
| Q6H3D5 | LWIMAVLLVVVEGSLVQLGK | Negative |
| Q6H3D5 | LLVVVEGSLVQLGKMIFQET | Negative |
| Q6H3D5 | KMIFQETGKNPATSYGLYGC | Negative |
| Q6H3D5 | WIMAVLLVVVEGSLVQLGKM | Negative |
| Q6H3D5 | VQLGKMIFQETGKNPATSYG | Negative |
| Q6H3D5 | TLWIMAVLLVVVEGSLVQLG | Negative |
| Q6H3D5 | VEGSLVQLGKMIFQETGKNP | Negative |
| Q6H3D5 | FQETGKNPATSYGLYGCNCG | Negative |
| Q6H3D5 | GKNPATSYGLYGCNCGPGGR | Negative |
| Q6H3D5 | LVQLGKMIFQETGKNPATSY | Negative |
| Q6H3D5 | SLVQLGKMIFQETGKNPATS | Negative |
| Q6H3D5 | TGKNPATSYGLYGCNCGPGG | Negative |
| Q6H3D5 | IFQETGKNPATSYGLYGCNC | Negative |
| Q6H3D5 | GSLVQLGKMIFQETGKNPAT | Negative |
| Q6H3D5 | MIFQETGKNPATSYGLYGCN | Negative |

|        |                       |          |
|--------|-----------------------|----------|
| Q6H3D5 | LGKMIFQETGKNPATSYGLY  | Negative |
| Q6H3D6 | GHLLQLRKMIIKMTNKEPIL  | Negative |
| Q6H3D6 | LRKMIKKMTNKEPILSYGKY  | Negative |
| Q6H3D6 | MRTLWIMAVLLLGVGHLLQ   | Negative |
| Q6H3D6 | IMAVLLLGVEGHLLQLRKMI  | Negative |
| Q6H3D6 | LLGVGHLLQLRKMIIKMTN   | Negative |
| Q6H3D6 | VEGHLLQLRKMIIKMTNKEP  | Negative |
| Q6H3D6 | LQLRKMIIKMTNKEPILSYG  | Negative |
| Q6H3D6 | NKEPILSYGKYGCNCGMAGR  | Negative |
| Q6H3D6 | QLRKMIIKMTNKEPILSYGK  | Negative |
| Q6H3D6 | RKMIKKMTNKEPILSYGKYG  | Negative |
| Q6H3D6 | LGVEGHLLQLRKMIIKMTNK  | Negative |
| Q6H3D6 | EGHLLQLRKMIIKMTNKEPI  | Negative |
| Q6H3D6 | TNKEPILSYGKYGCNCGMAG  | Negative |
| Q6H3D6 | KMIKKMTNKEPILSYGKYGC  | Negative |
| Q6H3D6 | LLQLRKMIIKMTNKEPILSY  | Negative |
| Q6H3D6 | TLWIMAVLLLGVEGHLLQLR  | Negative |
| Q6H3D6 | KMTNKEPILSYGKYGCNCGM  | Negative |
| Q6H3D6 | GVEGHLLQLRKMIIKMTNKE  | Negative |
| Q6H3D6 | MTNKEPILSYGKYGCNCGMA  | Negative |
| Q6H3D6 | IKKMTNKEPILSYGKYGCNC  | Negative |
| Q6H3D6 | WIMAVLLLGVEGHLLQLRKM  | Negative |
| Q6H3D6 | KKMTNKEPILSYGKYGCNCG  | Negative |
| Q6H3D6 | MAVLLLGVEGHLLQLRKMIIK | Negative |
| Q6H3D6 | AVLLLGVEGHLLQLRKMIIK  | Negative |
| Q6H3D6 | LLGVGHLLQLRKMIIKMT    | Negative |
| Q6H3D6 | HLLQLRKMIIKMTNKEPILS  | Negative |
| Q6H3D6 | MIKKMTNKEPILSYGKYGCN  | Negative |
| Q6H3D6 | LWIMAVLLLGVEGHLLQLRK  | Negative |
| Q6H3D6 | VLLLGVEGHLLQLRKMIIKKM | Negative |
| Q6H3D7 | MTNKEPILSYSKYGCNCGMA  | Negative |
| Q6H3D7 | LLLGVEGSLLQLRKMIIKMT  | Negative |
| Q6H3D7 | AVLLLGVEGSLLQLRKMIIK  | Negative |
| Q6H3D7 | EGSLLQLRKMIIKMTNKEPI  | Negative |
| Q6H3D7 | GSLLQLRKMIIKMTNKEPIL  | Negative |
| Q6H3D7 | LLQLRKMIIKMTNKEPILSY  | Negative |
| Q6H3D7 | IKKMTNKEPILSYSKYGCNC  | Negative |
| Q6H3D7 | TLLIMAVLLLGVEGSLLQLR  | Negative |
| Q6H3D7 | SLLQLRKMIIKMTNKEPILS  | Negative |
| Q6H3D7 | LIMAVLLLGVEGSLLQLRKM  | Negative |
| Q6H3D7 | VEGSLLQLRKMIIKMTNKEP  | Negative |
| Q6H3D7 | LQLRKMIIKMTNKEPILSYS  | Negative |
| Q6H3D7 | MRTLLIMAVLLLGVEGSLLQ  | Negative |
| Q6H3D7 | VLLLGVEGSLLQLRKMIIKKM | Negative |
| Q6H3D7 | TNKEPILSYSKYGCNCGMAG  | Negative |
| Q6H3D7 | MAVLLLGVEGSLLQLRKMIIK | Negative |

|        |                      |          |
|--------|----------------------|----------|
| Q6H3D7 | LGVEGSLLQLRKMIKKMTNK | Negative |
| Q6H3D7 | RKMIKKMTNKEPILSYSKYG | Negative |
| Q6H3D7 | GVEGSLLQLRKMIKKMTNKE | Negative |
| Q6H3D7 | LLGVEGSLLQLRKMIKKMTN | Negative |
| Q6H3D7 | LLIMAVLLLGVESLLQLRK  | Negative |
| Q6H3D7 | KMTNKEPILSYSKYGCNCGM | Negative |
| Q6H3D7 | KMIKKMTNKEPILSYSKYGC | Negative |
| Q6H3D7 | LRKMIKKMTNKEPILSYSKY | Negative |
| Q6H3D7 | KKMTNKEPILSYSKYGCNCG | Negative |
| Q6H3D7 | IMAVLLLGVESLLQLRKMI  | Negative |
| Q6H3D7 | QLRKMIKKMTNKEPILSYSK | Negative |
| Q6H3D7 | MIKKMTNKEPILSYSKYGCN | Negative |
| Q6H3D7 | NKEPILSYSKYGCNCGMAGR | Negative |
| Q6IV20 | ALLLFLQAVPGLGLPRDTS  | Negative |
| Q6IV20 | LQAVPGLGLPRDTSRCVGYH | Negative |
| Q6IV20 | SCLMALLLFLQAVPGLGLP  | Negative |
| Q6IV20 | GLGLPRDTSRCVGYHGYCIR | Negative |
| Q6IV20 | LFLQAVPGLGLPRDTSRCV  | Negative |
| Q6IV20 | PRDTSRCVGYHGYCIRSKVC | Negative |
| Q6IV20 | LLFLQAVPGLGLPRDTSRC  | Negative |
| Q6IV20 | CLMALLLFLQAVPGLGLPR  | Negative |
| Q6IV20 | MKLFSCLMALLLFLQAVPG  | Negative |
| Q6IV20 | LLQAVPGLGLPRDTSRCVGY | Negative |
| Q6IV20 | FLLQAVPGLGLPRDTSRCVG | Negative |
| Q6IV20 | LLLFLQAVPGLGLPRDTSR  | Negative |
| Q6IV20 | GLPRDTSRCVGYHGYCIRSK | Negative |
| Q6IV20 | AVPGLGLPRDTSRCVGYHGY | Negative |
| Q6IV20 | QAVPGLGLPRDTSRCVGYHG | Negative |
| Q6IV20 | CVGYHGYCIRSKVCPKFAA  | Negative |
| Q6IV20 | LGLPRDTSRCVGYHGYCIRS | Negative |
| Q6IV20 | VPGLGLPRDTSRCVGYHGYC | Negative |
| Q6IV20 | FSCLMALLLFLQAVPGLGL  | Negative |
| Q6IV20 | DTSRCVGYHGYCIRSKVCPK | Negative |
| Q6IV20 | KLFSCLMALLLFLQAVPGL  | Negative |
| Q6IV20 | TSRCVGYHGYCIRSKVCPKP | Negative |
| Q6IV20 | PGLGLPRDTSRCVGYHGYCI | Negative |
| Q6IV20 | LMALLLFLQAVPGLGLPRD  | Negative |
| Q6IV20 | LFSCLMALLLFLQAVPGLG  | Negative |
| Q6IV20 | RDTSRCVGYHGYCIRSKVCP | Negative |
| Q6IV20 | RCVGYHGYCIRSKVCPKFA  | Negative |
| Q6IV20 | SRCVGYHGYCIRSKVCPKPF | Negative |
| Q6IV20 | LPRDTSRCVGYHGYCIRSKV | Negative |
| Q6IWZ0 | VHADGVCRNRRQCNEVCGS  | Negative |
| Q6IWZ0 | LACALVISVHADGVCRNRRQ | Negative |
| Q6IWZ0 | CALVISVHADGVCRNRRQCN | Negative |
| Q6IWZ0 | FLLACALVISVHADGVCRN  | Negative |

|        |                       |          |
|--------|-----------------------|----------|
| Q6IWZ0 | SVHADGVCRRNRQCNKEVCG  | Negative |
| Q6IWZ0 | RQCNKEVCGSSYDVAIVGAG  | Negative |
| Q6IWZ0 | CRNRQCNKEVCGSSYDVAI   | Negative |
| Q6IWZ0 | GVCRRNRQCNKEVCGSSYDV  | Negative |
| Q6IWZ0 | ALVISVHADGVCRRNRQCNK  | Negative |
| Q6IWZ0 | MSSAFLLLACALVISVHADG  | Negative |
| Q6IWZ0 | NKEVCGSSYDVAIVGAGPGG  | Negative |
| Q6IWZ0 | VISVHADGVCRRNRQCNKEV  | Negative |
| Q6IWZ0 | HADGVCRRNRQCNKEVCGSS  | Negative |
| Q6IWZ0 | LLACALVISVHADGVCRRNR  | Negative |
| Q6IWZ0 | RNRQCNKEVCGSSYDVAIV   | Negative |
| Q6IWZ0 | SAFLLLACALVISVHADGVC  | Negative |
| Q6IWZ0 | ACALVISVHADGVCRRNRQC  | Negative |
| Q6IWZ0 | ISVHADGVCRRNRQCNKEVC  | Negative |
| Q6IWZ0 | KEVCGSSYDVAIVGAGPGGA  | Negative |
| Q6IWZ0 | DGVCRRNRQCNKEVCGSSYD  | Negative |
| Q6IWZ0 | SSAFLLLACALVISVHADGV  | Negative |
| Q6IWZ0 | RRQCNKEVCGSSYDVAIVGA  | Negative |
| Q6IWZ0 | CNKEVCGSSYDVAIVGAGPG  | Negative |
| Q6IWZ0 | QCNKEVCGSSYDVAIVGAGP  | Negative |
| Q6IWZ0 | ADGVCRRNRQCNKEVCGSSY  | Negative |
| Q6IWZ0 | LLLACALVISVHADGVCRRNR | Negative |
| Q6IWZ0 | LVISVHADGVCRRNRQCNKE  | Negative |
| Q6IWZ0 | NRRQCNKEVCGSSYDVAIVG  | Negative |
| Q6IWZ0 | VCCRRNRQCNKEVCGSSYDVA | Negative |
| Q6IY74 | PRGPLRPLCRPVNATLAAEN  | Negative |
| Q6IY74 | GGAQAPRGPLRPLCRPVNAT  | Negative |
| Q6IY74 | RPVNATLAAENEACPVCITF  | Negative |
| Q6IY74 | LLLWLLLGTGGAQAPRGPLR  | Negative |
| Q6IY74 | AQAPRGPLRPLCRPVNATLA  | Negative |
| Q6IY74 | TGGAQAPRGPLRPLCRPVNA  | Negative |
| Q6IY74 | LGTGGAQAPRGPLRPLCRPV  | Negative |
| Q6IY74 | MGTLLQGLLLWLLLGTGGAQA | Negative |
| Q6IY74 | GAQAPRGPLRPLCRPVNATL  | Negative |
| Q6IY74 | LWLLLGTGGAQAPRGPLRPL  | Negative |
| Q6IY74 | LLWLLLGTGGAQAPRGPLRP  | Negative |
| Q6IY74 | TLQGLLLWLLLGTGGAQAPR  | Negative |
| Q6IY74 | LCRPVNATLAAENEACPVC   | Negative |
| Q6IY74 | PLCRPVNATLAAENEACPVC  | Negative |
| Q6IY74 | LLGTGGAQAPRGPLRPLCR   | Negative |
| Q6IY74 | GTGGAQAPRGPLRPLCRPVN  | Negative |
| Q6IY74 | GLLLWLLLGTGGAQAPRGPL  | Negative |
| Q6IY74 | GTLQGLLLWLLLGTGGAQAP  | Negative |
| Q6IY74 | GPLRPLCRPVNATLAAENEA  | Negative |
| Q6IY74 | LLGTGGAQAPRGPLRPLCRP  | Negative |
| Q6IY74 | PLRPLCRPVNATLAAENEAC  | Negative |

|        |                       |          |
|--------|-----------------------|----------|
| Q6IY74 | QGLLLWLLGTGGAQAPRGP   | Negative |
| Q6IY74 | QAPRGPLRPLCRPVNATLAA  | Negative |
| Q6IY74 | LRPLCRPVNATLAAENEACP  | Negative |
| Q6IY74 | RPLCRPVNATLAAENEACPV  | Negative |
| Q6IY74 | RGPLRPLCRPVNATLAAENE  | Negative |
| Q6IY74 | APRGPLRPLCRPVNATLAAE  | Negative |
| Q6IY74 | CRPVNATLAAENEACPVCIT  | Negative |
| Q6IY74 | WLLLTGTGGAQAPRGPLRPLC | Negative |
| Q6JK69 | MRTLWIMAVLLVGVEGSLVE  | Negative |
| Q6JK69 | ILQETGKNPLTSYGAYGCNC  | Negative |
| Q6JK69 | LGKMILQETGKNPLTSYGAY  | Negative |
| Q6JK69 | GKMILQETGKNPLTSYGAYG  | Negative |
| Q6JK69 | ELGKMILQETGKNPLTSYGA  | Negative |
| Q6JK69 | SLVELGKMILQETGKNPLTS  | Negative |
| Q6JK69 | EGSLVELGKMILQETGKNPL  | Negative |
| Q6JK69 | LVGVEGSLVELGKMILQETG  | Negative |
| Q6JK69 | ETGKNPLTSYGAYGCNCVG   | Negative |
| Q6JK69 | LLVGVEGSLVELGKMILQET  | Negative |
| Q6JK69 | LQETGKNPLTSYGAYGCNCG  | Negative |
| Q6JK69 | VEGSLVELGKMILQETGKNP  | Negative |
| Q6JK69 | VGVEGSLVELGKMILQETGK  | Negative |
| Q6JK69 | GKNPLTSYGAYGCNCGVGGR  | Negative |
| Q6JK69 | GSLVELGKMILQETGKNPLT  | Negative |
| Q6JK69 | MILQETGKNPLTSYGAYGCN  | Negative |
| Q6JK69 | LWIMAVLLVGVEGSLVELGK  | Negative |
| Q6JK69 | WIMAVLLVGVEGSLVELGKM  | Negative |
| Q6JK69 | AVLLVGVEGSLVELGKMILQ  | Negative |
| Q6JK69 | TLWIMAVLLVGVEGSLVELG  | Negative |
| Q6JK69 | MAVLLVGVEGSLVELGKMIL  | Negative |
| Q6JK69 | GVEGSLVELGKMILQETGKN  | Negative |
| Q6JK69 | KMILQETGKNPLTSYGAYGC  | Negative |
| Q6JK69 | TGKNPLTSYGAYGCNCGVGG  | Negative |
| Q6JK69 | VELGKMILQETGKNPLTSYG  | Negative |
| Q6JK69 | QETGKNPLTSYGAYGCNCGV  | Negative |
| Q6JK69 | VLLVGVEGSLVELGKMILQE  | Negative |
| Q6JK69 | IMAVLLVGVEGSLVELGKMI  | Negative |
| Q6JK69 | LVELGKMILQETGKNPLTSY  | Negative |
| Q6KF81 | FGGFQRDEPDGVPTAQKQHD  | Negative |
| Q6KF81 | TAQKQHDINFLHKLYPEPLH  | Negative |
| Q6KF81 | DGVPTAQKQHDINFLHKL    | Negative |
| Q6KF81 | LVAATAAWPYFGGFQRDEPD  | Negative |
| Q6KF81 | AWPYFGGFQRDEPDGVPTAQ  | Negative |
| Q6KF81 | AAWPYFGGFQRDEPDGVPTA  | Negative |
| Q6KF81 | VPTAQKQHDINFLHKLYPEP  | Negative |
| Q6KF81 | EPDGVPTAQKQHDINFLHK   | Negative |
| Q6KF81 | WPYFGGFQRDEPDGVPTAQK  | Negative |

|        |                      |          |
|--------|----------------------|----------|
| Q6KF81 | RDEPDGVPTAQKQHDINFL  | Negative |
| Q6KF81 | FQRDEPDGVPTAQKQHDINF | Negative |
| Q6KF81 | DEPDGVPTAQKQHDINFLH  | Negative |
| Q6KF81 | GGFQRDEPDGVPTAQKQHDI | Negative |
| Q6KF81 | PYFGGFQRDEPDGVPTAQKQ | Negative |
| Q6KF81 | ATAAWPYFGGFQRDEPDGVP | Negative |
| Q6KF81 | GFQRDEPDGVPTAQKQHDIN | Negative |
| Q6KF81 | LLCSLVAATAAWPYFGGFQR | Negative |
| Q6KF81 | YFGGFQRDEPDGVPTAQKQH | Negative |
| Q6KF81 | AATAAWPYFGGFQRDEPDGV | Negative |
| Q6KF81 | AQKQHDINFLHKL YEPLHE | Negative |
| Q6KF81 | GVPTAQKQHDINFLHKL YE | Negative |
| Q6KF81 | QRDEPDGVPTAQKQHDINFL | Negative |
| Q6KF81 | VLLCSLVAATAAWPYFGGFQ | Negative |
| Q6KF81 | PDGVPTAQKQHDINFLHKL  | Negative |
| Q6KF81 | LCSLVAATAAWPYFGGFQRD | Negative |
| Q6KF81 | SLVAATAAWPYFGGFQRDEP | Negative |
| Q6KF81 | TAAWPYFGGFQRDEPDGVPT | Negative |
| Q6KF81 | CSLVAATAAWPYFGGFQRDE | Negative |
| Q6KF81 | PTAQKQHDINFLHKL YEPL | Negative |
| Q6KF82 | AAASPYSGSHDFSGFQRDEP | Negative |
| Q6KF82 | VPTAQKQHDINFLHKL YEP | Negative |
| Q6KF82 | VVAAAAASPYSGSHDFSGFQ | Negative |
| Q6KF82 | SGSHDFSGFQRDEPDGVPTA | Negative |
| Q6KF82 | QRDEPDGVPTAQKQHDINFL | Negative |
| Q6KF82 | SPYSGSHDFSGFQRDEPDGV | Negative |
| Q6KF82 | EPDGVPTAQKQHDINFLHKL | Negative |
| Q6KF82 | AAAAASPYSGSHDFSGFQRD | Negative |
| Q6KF82 | YSGSHDFSGFQRDEPDGVPT | Negative |
| Q6KF82 | DEPDGVPTAQKQHDINFLH  | Negative |
| Q6KF82 | AASPYSGSHDFSGFQRDEPD | Negative |
| Q6KF82 | SHDFSGFQRDEPDGVPTAQK | Negative |
| Q6KF82 | HDFSGFQRDEPDGVPTAQKQ | Negative |
| Q6KF82 | GFQRDEPDGVPTAQKQHDIN | Negative |
| Q6KF82 | DGVPTAQKQHDINFLHKL Y | Negative |
| Q6KF82 | DFSGFQRDEPDGVPTAQKQH | Negative |
| Q6KF82 | VAAAAASPYSGSHDFSGFQR | Negative |
| Q6KF82 | GVPTAQKQHDINFLHKL YE | Negative |
| Q6KF82 | PDGVPTAQKQHDINFLHKL  | Negative |
| Q6KF82 | GSHDFSGFQRDEPDGVPTAQ | Negative |
| Q6KF82 | SGFQRDEPDGVPTAQKQHDI | Negative |
| Q6KF82 | LVVAAAAASPYSGSHDFSGF | Negative |
| Q6KF82 | RDEPDGVPTAQKQHDINFL  | Negative |
| Q6KF82 | FQRDEPDGVPTAQKQHDINF | Negative |
| Q6KF82 | PYSGSHDFSGFQRDEPDGVP | Negative |
| Q6KF82 | SLVVAAAAASPYSGSHDFSG | Negative |



|        |                         |          |
|--------|-------------------------|----------|
| Q6KF82 | PTAQKQHDI N FLLHKL YEPL | Negative |
| Q6KF82 | AAAASPYSGSHDFSGFQRDE    | Negative |
| Q6KF82 | FSGFQRDEPDGVPTAQKQHD    | Negative |
| Q6PSU2 | LLAAHASARQQWELQGDRRC    | Negative |
| Q6PSU2 | LALFLLAAHASARQQWELQG    | Negative |
| Q6PSU2 | QQWELQGDRRCQSQLERANL    | Negative |
| Q6PSU2 | RQQWELQGDRRCQSQLERAN    | Negative |
| Q6PSU2 | LQGDRRCQSQLERANLRPCE    | Negative |
| Q6PSU2 | ASARQQWELQGDRRCQSQLE    | Negative |
| Q6PSU2 | ALFLLAAHASARQQWELQGD    | Negative |
| Q6PSU2 | AKLTILVALALFLLAAHASA    | Negative |
| Q6PSU2 | ALALFLLAAHASARQQWELQ    | Negative |
| Q6PSU2 | KLTLVALALFLLAAHASAR     | Negative |
| Q6PSU2 | LAAHASARQQWELQGDRRCQ    | Negative |
| Q6PSU2 | QWELQGDRRCQSQLERANLR    | Negative |
| Q6PSU2 | QGDRRCQSQLERANLRPCEQ    | Negative |
| Q6PSU2 | DRRCQSQLERANLRPCEQHL    | Negative |
| Q6PSU2 | TILVALALFLLAAHASARQQ    | Negative |
| Q6PSU2 | LTILVALALFLLAAHASARQ    | Negative |
| Q6PSU2 | LFLAAHASARQQWELQGDR     | Negative |
| Q6PSU2 | ELQGDRRCQSQLERANLRPC    | Negative |
| Q6PSU2 | ILVALALFLLAAHASARQQW    | Negative |
| Q6PSU2 | SARQQWELQGDRRCQSQLER    | Negative |
| Q6PSU2 | VALALFLLAAHASARQQWEL    | Negative |
| Q6PSU2 | FLLAAHASARQQWELQGDRR    | Negative |
| Q6PSU2 | AHASARQQWELQGDRRCQSQ    | Negative |
| Q6PSU2 | MAKLTILVALALFLLAAHAS    | Negative |
| Q6PSU2 | AAHASARQQWELQGDRRCQS    | Negative |
| Q6PSU2 | GDRRCQSQLERANLRPCEQH    | Negative |
| Q6PSU2 | ARQQWELQGDRRCQSQLERA    | Negative |
| Q6PSU2 | WELQGDRRCQSQLERANLRP    | Negative |
| Q6PSU2 | HASARQQWELQGDRRCQSQL    | Negative |
| Q6QD51 | LDSDGRPGRKVPLASPISSR    | Negative |
| Q6QD51 | TWKMGPHFTMLLAMWLVC GS   | Negative |
| Q6QD51 | QSSALDSDGRPGRKVPLASP    | Negative |
| Q6QD51 | MWLVC GSASQSSALDSDGRP   | Negative |
| Q6QD51 | ASQSSALDSDGRPGRKVPLA    | Negative |
| Q6QD51 | SSALDSDGRPGRKVPLASPI    | Negative |
| Q6QD51 | SASQSSALDSDGRPGRKVPL    | Negative |
| Q6QD51 | SQSSALDSDGRPGRKVPLAS    | Negative |
| Q6QD51 | MGP HFTMLLAMWLVC GSASQ  | Negative |
| Q6QD51 | ALDSDGRPGRKVPLASPISS    | Negative |
| Q6QD51 | LVC GSASQSSALDSDGRPGR   | Negative |
| Q6QD51 | WKMGPHFTMLLAMWLVC GSA   | Negative |
| Q6QD51 | MLLAMWLVC GSASQSSALDS   | Negative |
| Q6QD51 | AMWLVC GSASQSSALDSDGR   | Negative |

|        |                      |          |
|--------|----------------------|----------|
| Q6QD51 | MTWKMGPHFTMLLAMWLVCG | Negative |
| Q6QD51 | KMGPHFTMLLAMWLVCGSAS | Negative |
| Q6QD51 | TMLLAMWLVCGSASQSSALD | Negative |
| Q6QD51 | PHFTMLLAMWLVCGSASQSS | Negative |
| Q6QD51 | WLVCGSASQSSALDSDGRPG | Negative |
| Q6QD51 | HFTMLLAMWLVCGSASQSSA | Negative |
| Q6QD51 | LLAMWLVCGSASQSSALDSD | Negative |
| Q6QD51 | SDGRPGRKVPLASPISSRSA | Negative |
| Q6QD51 | GPHFTMLLAMWLVCGSASQS | Negative |
| Q6QD51 | CGSASQSSALDSDGRPGRKV | Negative |
| Q6QD51 | DSDGRPGRKVPLASPISSRS | Negative |
| Q6QD51 | GSASQSSALDSDGRPGRKVP | Negative |
| Q6QD51 | SALDSDGRPGRKVPLASPI  | Negative |
| Q6QD51 | FTMLLAMWLVCGSASQSSAL | Negative |
| Q6QD51 | VCGSASQSSALDSDGRPGRK | Negative |
| Q6QX33 | SFGLLVVFLSLSGAKGNCP  | Negative |
| Q6QX33 | AKGNCPQDWLPMNGLCYKI  | Negative |
| Q6QX33 | GNNCPQDWLPMNGLCYKIFD | Negative |
| Q6QX33 | SLSGAKGNCPQDWLPMNGL  | Negative |
| Q6QX33 | NCPQDWLPMNGLCYKIFDEL | Negative |
| Q6QX33 | DWLPMNGLCYKIFDELKAWK | Negative |
| Q6QX33 | VFLSLSGAKGNCPQDWLPM  | Negative |
| Q6QX33 | LSLSGAKGNCPQDWLPMNG  | Negative |
| Q6QX33 | LLVVFLSLSGAKGNCPQDW  | Negative |
| Q6QX33 | NNCPQDWLPMNGLCYKIFDE | Negative |
| Q6QX33 | FLSLSGAKGNCPQDWLPMN  | Negative |
| Q6QX33 | SGAKGNCPQDWLPMNGLCY  | Negative |
| Q6QX33 | WLPNGLCYKIFDELKAWKD  | Negative |
| Q6QX33 | LVVFLSLSGAKGNCPQDWL  | Negative |
| Q6QX33 | PQDWLPMNGLCYKIFDELKA | Negative |
| Q6QX33 | VVFLSLSGAKGNCPQDWLP  | Negative |
| Q6QX33 | QDWLPMNGLCYKIFDELKAW | Negative |
| Q6QX33 | RFIFVSFGLLVVFLSLSGAK | Negative |
| Q6QX33 | GRFIFVSFGLLVVFLSLSGA | Negative |
| Q6QX33 | LSGAKGNCPQDWLPMNGLC  | Negative |
| Q6QX33 | MGRFIFVSFGLLVVFLSLSG | Negative |
| Q6QX33 | GAKGNCPQDWLPMNGLCYK  | Negative |
| Q6QX33 | KGNNCPQDWLPMNGLCYKIF | Negative |
| Q6QX33 | CPQDWLPMNGLCYKIFDELK | Negative |
| Q6QX33 | FIFVSFGLLVVFLSLSGAKG | Negative |
| Q6QX33 | FVSFGLLVVFLSLSGAKGNN | Negative |
| Q6QX33 | VSFGLLVVFLSLSGAKGNNC | Negative |
| Q6QX33 | IFVSFGLLVVFLSLSGAKGN | Negative |
| Q6QX33 | GLLVVFLSLSGAKGNCPQD  | Negative |
| Q6RG02 | AAPWGADVPRCSTECPVTGS | Negative |
| Q6RG02 | VAGGLAAPWGADVPRCSTEC | Negative |

|        |                       |          |
|--------|-----------------------|----------|
| Q6RG02 | VPRCSTECPVTGSPKLAYQP  | Negative |
| Q6RG02 | CSTECPVTGSPKLAYQPKDT  | Negative |
| Q6RG02 | PRCSTECPVTGSPKLAYQPD  | Negative |
| Q6RG02 | TECPVTGSPKLAYQPKDTYA  | Negative |
| Q6RG02 | LLFVLAFVAGGLAAPWGADV  | Negative |
| Q6RG02 | LAAPWGADVPRCSTECPVTG  | Negative |
| Q6RG02 | DVPRCSTECPVTGSPKLAYQ  | Negative |
| Q6RG02 | ADVPRCSTECPVTGSPKLAY  | Negative |
| Q6RG02 | PWGADVPRCSTECPVTGSPK  | Negative |
| Q6RG02 | GLAAPWGADVPRCSTECPVT  | Negative |
| Q6RG02 | APWGADVPRCSTECPVTGSP  | Negative |
| Q6RG02 | AGGLAAPWGADVPRCSTECP  | Negative |
| Q6RG02 | LFVLAFVAGGLAAPWGADV   | Negative |
| Q6RG02 | GGLAAPWGADVPRCSTECPV  | Negative |
| Q6RG02 | LAFVAGGLAAPWGADVPRCS  | Negative |
| Q6RG02 | TLLFVLAFVAGGLAAPWGAD  | Negative |
| Q6RG02 | GADVPRCSTECPVTGSPKLA  | Negative |
| Q6RG02 | VLAFFVAGGLAAPWGADVPRC | Negative |
| Q6RG02 | WGADVPRCSTECPVTGSPKL  | Negative |
| Q6RG02 | AFVAGGLAAPWGADVPRCST  | Negative |
| Q6RG02 | STECPVTGSPKLAYQPKDTY  | Negative |
| Q6RG02 | RCSTECPVTGSPKLAYQPKD  | Negative |
| Q6RG02 | FVAGGLAAPWGADVPRCSTE  | Negative |
| Q6RG02 | MTTSTLLFVLAFVAGGLAAP  | Negative |
| Q6RG02 | FVLAFVAGGLAAPWGADVPR  | Negative |
| Q6RG02 | TSTLLFVLAFVAGGLAAPWG  | Negative |
| Q6RG02 | TTSTLLFVLAFVAGGLAAPW  | Negative |
| Q6RUF5 | YILSVILVFFVGVNGMEVYA  | Negative |
| Q6RUF5 | GMEVYALEESRDVYLSLDLW  | Negative |
| Q6RUF5 | VFFVGVNGMEVYALEESRDV  | Negative |
| Q6RUF5 | FFVGVNGMEVYALEESRDVY  | Negative |
| Q6RUF5 | NGMEVYALEESRDVYLSLDL  | Negative |
| Q6RUF5 | VTMKNLKKYIKYILSVILV   | Negative |
| Q6RUF5 | ILSVILVFFVGVNGMEVYAL  | Negative |
| Q6RUF5 | NLKKYIKYILSVILVFFVGV  | Negative |
| Q6RUF5 | MKNLKKYIKYILSVILVFF   | Negative |
| Q6RUF5 | KNNLKKYIKYILSVILVFFV  | Negative |
| Q6RUF5 | FVGVNGMEVYALEESRDVYL  | Negative |
| Q6RUF5 | VGVNGMEVYALEESRDVYLS  | Negative |
| Q6RUF5 | YIKYILSVILVFFVGVNGME  | Negative |
| Q6RUF5 | GGVTMKNLKKYIKYILSVI   | Negative |
| Q6RUF5 | TMKNLKKYIKYILSVILVF   | Negative |
| Q6RUF5 | GVTMKNLKKYIKYILSVIL   | Negative |
| Q6RUF5 | GVNGMEVYALEESRDVYLS   | Negative |
| Q6RUF5 | KKYIKYILSVILVFFVGVNG  | Negative |
| Q6RUF5 | KYILSVILVFFVGVNGMEVY  | Negative |

|        |                      |          |
|--------|----------------------|----------|
| Q6RUF5 | IKYILSVILVFFVGVNGMEV | Negative |
| Q6RUF5 | VNGMEVYALEESRDVYLSDL | Negative |
| Q6RUF5 | LSVILVFFVGVNGMEVYALE | Negative |
| Q6RUF5 | NNLKKYIKYILSVILVFFVG | Negative |
| Q6RUF5 | LVFFVGVNGMEVYALEESRD | Negative |
| Q6RUF5 | KYIKYILSVILVFFVGVNGM | Negative |
| Q6RUF5 | SVILVFFVGVNGMEVYALEE | Negative |
| Q6RUF5 | MGGVTMKNLKKYIKYILSV  | Negative |
| Q6RUF5 | LKKYIKYILSVILVFFVGVN | Negative |
| Q6RUF5 | VILVFFVGVNGMEVYALEES | Negative |
| Q6T6C1 | GHDDHEHEELTLEKIKEKIK | Negative |
| Q6T6C1 | DHGHDDHEHEELTLEKIKEK | Negative |
| Q6T6C1 | QADHHHDHGHDDHEHEELTL | Negative |
| Q6T6C1 | IILALFLGMTAFLAVQADHH | Negative |
| Q6T6C1 | VQADHHHDHGHDDHEHEELT | Negative |
| Q6T6C1 | GMTAFLAVQADHHHDHGHDD | Negative |
| Q6T6C1 | LGMTAFLAVQADHHHDHGH  | Negative |
| Q6T6C1 | DHHHDHGHDDHEHEELTLEK | Negative |
| Q6T6C1 | KIILALFLGMTAFLAVQADH | Negative |
| Q6T6C1 | HHDHGHDDHEHEELTLEKIK | Negative |
| Q6T6C1 | AFLAVQADHHHDHGHDDHEH | Negative |
| Q6T6C1 | FLGMTAFLAVQADHHHDHGH | Negative |
| Q6T6C1 | DDHEHEELTLEKIKEKIKDY | Negative |
| Q6T6C1 | HDHGHDDHEHEELTLEKIKE | Negative |
| Q6T6C1 | MTAFLAVQADHHHDHGHDDH | Negative |
| Q6T6C1 | AKIILALFLGMTAFLAVQAD | Negative |
| Q6T6C1 | LFLGMTAFLAVQADHHHDHG | Negative |
| Q6T6C1 | MHAKIILALFLGMTAFLAVQ | Negative |
| Q6T6C1 | LAVQADHHHDHGHDDHEHEE | Negative |
| Q6T6C1 | ADHHHDHGHDDHEHEELTLE | Negative |
| Q6T6C1 | HAKIILALFLGMTAFLAVQA | Negative |
| Q6T6C1 | HHHDHGHDDHEHEELTLEKI | Negative |
| Q6T6C1 | ALFLGMTAFLAVQADHHHDH | Negative |
| Q6T6C1 | TAFLAVQADHHHDHGHDDHE | Negative |
| Q6T6C1 | HGHDDHEHEELTLEKIKEKI | Negative |
| Q6T6C1 | FLAVQADHHHDHGHDDHEHE | Negative |
| Q6T6C1 | AVQADHHHDHGHDDHEHEEL | Negative |
| Q6T6C1 | HDDHEHEELTLEKIKEKIKD | Negative |
| Q6T6C1 | ILALFLGMTAFLAVQADHHH | Negative |
| Q6T6C2 | LKSGLSILLCFGICIAVINA | Negative |
| Q6T6C2 | ICIAVINAGCFEDWSRCSPS | Negative |
| Q6T6C2 | CFEDWSRCSPSTSRGTGVLW | Negative |
| Q6T6C2 | ELKSGLSILLCFGICIAVIN | Negative |
| Q6T6C2 | INAGCFEDWSRCSPSTSRGT | Negative |
| Q6T6C2 | CIAVINAGCFEDWSRCSPST | Negative |
| Q6T6C2 | GLSILLCFGICIAVINAGCF | Negative |

|        |                      |          |
|--------|----------------------|----------|
| Q6T6C2 | RCSPSTSRGTGVLWRDCDSY | Negative |
| Q6T6C2 | AGCFEDWSRCSPSTSRGTGV | Negative |
| Q6T6C2 | VINAGCFEDWSRCSPSTSRG | Negative |
| Q6T6C2 | LLCFGICIAVINAGCFEDWS | Negative |
| Q6T6C2 | MELKSGLSILLCFGICIAVI | Negative |
| Q6T6C2 | EDWSRCSPSTSRGTGVLWRD | Negative |
| Q6T6C2 | FGICIAVINAGCFEDWSRCS | Negative |
| Q6T6C2 | LCFGICIAVINAGCFEDWSR | Negative |
| Q6T6C2 | NAGCFEDWSRCSPSTSRGTG | Negative |
| Q6T6C2 | IAVINAGCFEDWSRCSPSTS | Negative |
| Q6T6C2 | ILLCFGICIAVINAGCFEDW | Negative |
| Q6T6C2 | AVINAGCFEDWSRCSPSTSR | Negative |
| Q6T6C2 | GCFEDWSRCSPSTSRGTGVL | Negative |
| Q6T6C2 | CFGICIAVINAGCFEDWSRC | Negative |
| Q6T6C2 | FEDWSRCSPSTSRGTGVLWR | Negative |
| Q6T6C2 | GICIAVINAGCFEDWSRCSP | Negative |
| Q6T6C2 | SRCSPSTSRGTGVLWRDCDS | Negative |
| Q6T6C2 | DWSRCSPSTSRGTGVLWRDC | Negative |
| Q6T6C2 | WSRCSPSTSRGTGVLWRDCD | Negative |
| Q6T6C2 | SGLSILLCFGICIAVINAGC | Negative |
| Q6T6C2 | LSILLCFGICIAVINAGCFE | Negative |
| Q6T6C2 | KSGLSILLCFGICIAVINAG | Negative |
| Q6T6S5 | TLWAELTPVSGKKRPDFCYL | Negative |
| Q6T6S5 | PVSGKKRPDFCYLPADTGPC | Negative |
| Q6T6S5 | LLLGLLTLWAELTPVSGKKR | Negative |
| Q6T6S5 | SGGLLLLGLLTLWAELTPV  | Negative |
| Q6T6S5 | LLLGLLTLWAELTPVSGKK  | Negative |
| Q6T6S5 | DFCYLPADTGPCMANFPRFY | Negative |
| Q6T6S5 | LTLWAELTPVSGKKRPDFCY | Negative |
| Q6T6S5 | VSGKKRPDFCYLPADTGPCM | Negative |
| Q6T6S5 | RPDFCYLPADTGPCMANFPR | Negative |
| Q6T6S5 | LLGLLTLWAELTPVSGKKRP | Negative |
| Q6T6S5 | MSSGGLLLLGLLTLWAELT  | Negative |
| Q6T6S5 | LLLLGLLTLWAELTPVSGK  | Negative |
| Q6T6S5 | WAELTPVSGKKRPDFCYLPA | Negative |
| Q6T6S5 | PDFCYLPADTGPCMANFPRF | Negative |
| Q6T6S5 | GKKRPDFCYLPADTGPCMAN | Negative |
| Q6T6S5 | KKRPDFCYLPADTGPCMANF | Negative |
| Q6T6S5 | TPVSGKKRPDFCYLPADTGP | Negative |
| Q6T6S5 | KRPDFCYLPADTGPCMANFP | Negative |
| Q6T6S5 | AELTPVSGKKRPDFCYLPAD | Negative |
| Q6T6S5 | SGKKRPDFCYLPADTGPCMA | Negative |
| Q6T6S5 | FCYLPADTGPCMANFPRFYY | Negative |
| Q6T6S5 | LLTLWAELTPVSGKKRPDFC | Negative |
| Q6T6S5 | GGLLLLGLLTLWAELTPVS  | Negative |
| Q6T6S5 | LTPVSGKKRPDFCYLPADTG | Negative |

|        |                      |          |
|--------|----------------------|----------|
| Q6T6S5 | LWAELTPVSGKKRPDFCYLP | Negative |
| Q6T6S5 | SSGLLLLLLGLLTLWAELTP | Negative |
| Q6T6S5 | ELTPVSGKKRPDFCYLPADT | Negative |
| Q6T6S5 | GLLLLLGLLTLWAELTPVSG | Negative |
| Q6T6S5 | GLLTLWAELTPVSGKKRPDF | Negative |
| Q6T6T4 | GLYPRDVMDEPVQEAAFAV  | Negative |
| Q6T6T4 | ALPALKVGGLYPRDVMDEPV | Negative |
| Q6T6T4 | LLLLLLLPSALPALKVGGLY | Negative |
| Q6T6T4 | LLPSALPALKVGGLYPRDVM | Negative |
| Q6T6T4 | HCLLLLLLLPSALPALKVGG | Negative |
| Q6T6T4 | VAAPHCLLLLLLLPSALPAL | Negative |
| Q6T6T4 | AAPHCLLLLLLLPSALPALK | Negative |
| Q6T6T4 | ALKVGGLYPRDVMDEPVQEA | Negative |
| Q6T6T4 | LPSALPALKVGGLYPRDVM  | Negative |
| Q6T6T4 | APHCLLLLLLLPSALPALKV | Negative |
| Q6T6T4 | PHCLLLLLLLPSALPALKVG | Negative |
| Q6T6T4 | LLLPSALPALKVGGLYPRD  | Negative |
| Q6T6T4 | SALPALKVGGLYPRDVMDE  | Negative |
| Q6T6T4 | LLLLLLPSALPALKVGGLYP | Negative |
| Q6T6T4 | HSRLLVAAPHCLLLLLLLPS | Negative |
| Q6T6T4 | KVGGLYPRDVMDEPVQEAAA | Negative |
| Q6T6T4 | LKVGGLYPRDVMDEPVQEAA | Negative |
| Q6T6T4 | LPALKVGGLYPRDVMDEPVQ | Negative |
| Q6T6T4 | LLPSALPALKVGGLYPRDV  | Negative |
| Q6T6T4 | PALKVGGLYPRDVMDEPVQE | Negative |
| Q6T6T4 | MHSRLLVAAPHCLLLLLLLP | Negative |
| Q6T6T4 | LLLLPSALPALKVGGLYPR  | Negative |
| Q6T6T4 | SRLVAAPHCLLLLLLLPSA  | Negative |
| Q6T6T4 | PSALPALKVGGLYPRDVM   | Negative |
| Q6T6T4 | VGGLYPRDVMDEPVQEAAAF | Negative |
| Q6T6T4 | RLLVAAPHCLLLLLLLPSAL | Negative |
| Q6T6T4 | GGLYPRDVMDEPVQEAAFA  | Negative |
| Q6T6T4 | LVAAPHCLLLLLLLPSALPA | Negative |
| Q6T6T4 | LLVAAPHCLLLLLLLPSALP | Negative |
| Q6T6T5 | LTLWAELTPVSGKNRPEFCN | Negative |
| Q6T6T5 | LLLGLLTLWAELTPVSGKN  | Negative |
| Q6T6T5 | SSGLLLLLLGLLTLWAELTP | Negative |
| Q6T6T5 | LWAELTPVSGKNRPEFCNLP | Negative |
| Q6T6T5 | VSGKNRPEFCNLPADTGPK  | Negative |
| Q6T6T5 | MSSGLLLLLLGLLTLWAELT | Negative |
| Q6T6T5 | GLLTLWAELTPVSGKNRPEF | Negative |
| Q6T6T5 | ELTPVSGKNRPEFCNLPADT | Negative |
| Q6T6T5 | SGKNRPEFCNLPADTGPKCA | Negative |
| Q6T6T5 | LLLLGLLTLWAELTPVSGK  | Negative |
| Q6T6T5 | NRPEFCNLPADTGPKAYEP  | Negative |
| Q6T6T5 | GLLLLLGLLTLWAELTPVSG | Negative |

|        |                       |          |
|--------|-----------------------|----------|
| Q6T6T5 | GGLLLLLGLLTLWAELTPVS  | Negative |
| Q6T6T5 | TLWAELTPVSGKNRPEFCNL  | Negative |
| Q6T6T5 | TPVSGKNRPEFCNLPADTGP  | Negative |
| Q6T6T5 | LLTLWAELTPVSGKNRPEFC  | Negative |
| Q6T6T5 | LTPVSGKNRPEFCNLPADTG  | Negative |
| Q6T6T5 | PEFCNLPADTGPCCKAYEPRF | Negative |
| Q6T6T5 | RPEFCNLPADTGPCCKAYEPR | Negative |
| Q6T6T5 | FCNLPADTGPCCKAYEPRFYY | Negative |
| Q6T6T5 | KNRPEFCNLPADTGPCCKAYE | Negative |
| Q6T6T5 | PVSGKNRPEFCNLPADTGPC  | Negative |
| Q6T6T5 | EFCNLPADTGPCCKAYEPRFY | Negative |
| Q6T6T5 | LLLGLLTLWAELTPVSGKNR  | Negative |
| Q6T6T5 | GKNRPEFCNLPADTGPCCKAY | Negative |
| Q6T6T5 | SGGLLLLLGLLTLWAELTPV  | Negative |
| Q6T6T5 | AELTPVSGKNRPEFCNLPAD  | Negative |
| Q6T6T5 | LLGLLTLWAELTPVSGKNRP  | Negative |
| Q6T6T5 | WAELTPVSGKNRPEFCNLPA  | Negative |
| Q6TPK4 | SAAVVGGRKLVAAGGWRPIE  | Negative |
| Q6TPK4 | KPLSLLLFLLLALSAAVVGG  | Negative |
| Q6TPK4 | PKPLSLLLFLLLALSAAVVG  | Negative |
| Q6TPK4 | LALSAAVVGGRKLVAAGGWR  | Negative |
| Q6TPK4 | LLLFLLLALSAAVVGGRKLV  | Negative |
| Q6TPK4 | FLLLALSAAVVGGRKLVAAG  | Negative |
| Q6TPK4 | AAVVGGRKLVAAGGWRPIES  | Negative |
| Q6TPK4 | VPKPLSLLLFLLLALSAAVV  | Negative |
| Q6TPK4 | KLVAAGGWRPIESLNSAEVQ  | Negative |
| Q6TPK4 | GGRKLVAAGGWRPIESLNSA  | Negative |
| Q6TPK4 | RKLVAAGGWRPIESLNSAEV  | Negative |
| Q6TPK4 | VGGRKLVAAGGWRPIESLNS  | Negative |
| Q6TPK4 | ALSAAVVGGRKLVAAGGWRP  | Negative |
| Q6TPK4 | LLALSAAVVGGRKLVAAGGW  | Negative |
| Q6TPK4 | AGGWRPIESLNSAEVQDVAQ  | Negative |
| Q6TPK4 | MVPKPLSLLLFLLLALSAAV  | Negative |
| Q6TPK4 | GGWRPIESLNSAEVQDVAQF  | Negative |
| Q6TPK4 | LSLLLFLLLALSAAVVGGRK  | Negative |
| Q6TPK4 | LFLLLALSAAVVGGRKLVA   | Negative |
| Q6TPK4 | LLFLLALSAAVVGGRKLVA   | Negative |
| Q6TPK4 | LVAAGGWRPIESLNSAEVQD  | Negative |
| Q6TPK4 | AAGGWRPIESLNSAEVQDVA  | Negative |
| Q6TPK4 | VAAGGWRPIESLNSAEVQDV  | Negative |
| Q6TPK4 | VVGGRKLVAAGGWRPIESLN  | Negative |
| Q6TPK4 | LSAAVVGGRKLVAAGGWRPI  | Negative |
| Q6TPK4 | GRKLVAAGGWRPIESLNSAE  | Negative |
| Q6TPK4 | PLSLLLFLLLALSAAVVGGR  | Negative |
| Q6TPK4 | SLLLFLLLALSAAVVGGRKL  | Negative |
| Q6TPK4 | AAVVGGRKLVAAGGWRPIESL | Negative |

|        |                      |          |
|--------|----------------------|----------|
| Q6UW01 | HWLPGPLHSPGLPLVLVLLA | Negative |
| Q6UW01 | GPLHSPGLPLVLVLLALGAG | Negative |
| Q6UW01 | AKPHWLPGPLHSPGLPLVLV | Negative |
| Q6UW01 | GLPLVLVLLALGAGWAQEGS | Negative |
| Q6UW01 | GAGWAQEGSEPVLLEGECLV | Negative |
| Q6UW01 | LGAGWAQEGSEPVLLEGECL | Negative |
| Q6UW01 | VLLALGAGWAQEGSEPVLE  | Negative |
| Q6UW01 | GAKPHWLPGPLHSPGLPLVL | Negative |
| Q6UW01 | PGLPLVLVLLALGAGWAQEG | Negative |
| Q6UW01 | MLGAKPHWLPGPLHSPGLPL | Negative |
| Q6UW01 | PLVLVLLALGAGWAQEGSEP | Negative |
| Q6UW01 | GWAQEGSEPVLLEGECLVVC | Negative |
| Q6UW01 | VLVLLALGAGWAQEGSEPVL | Negative |
| Q6UW01 | LPGPLHSPGLPLVLVLLALG | Negative |
| Q6UW01 | AGWAQEGSEPVLLEGECLVV | Negative |
| Q6UW01 | LVLLALGAGWAQEGSEPVLL | Negative |
| Q6UW01 | LLALGAGWAQEGSEPVLLEG | Negative |
| Q6UW01 | PHWLPGPLHSPGLPLVLVLL | Negative |
| Q6UW01 | PLHSPGLPLVLVLLALGAGW | Negative |
| Q6UW01 | LALGAGWAQEGSEPVLLEGE | Negative |
| Q6UW01 | WLPGPLHSPGLPLVLVLLAL | Negative |
| Q6UW01 | LGAKPHWLPGPLHSPGLPLV | Negative |
| Q6UW01 | HSPGLPLVLVLLALGAGWAQ | Negative |
| Q6UW01 | SPGLPLVLVLLALGAGWAQE | Negative |
| Q6UW01 | ALGAGWAQEGSEPVLLEGEC | Negative |
| Q6UW01 | KPHWLPGPLHSPGLPLVLVL | Negative |
| Q6UW01 | LVLVLLALGAGWAQEGSEPV | Negative |
| Q6UW01 | PGPLHSPGLPLVLVLLALGA | Negative |
| Q6UW01 | LHSPGLPLVLVLLALGAGWA | Negative |
| Q6UW10 | GMTLQLKLKESFLTNSYES  | Negative |
| Q6UW10 | TGPGMTLQLKLKESFLTNS  | Negative |
| Q6UW10 | GTGPGMTLQLKLKESFLTNS | Negative |
| Q6UW10 | PGMTLQLKLKESFLTNSYE  | Negative |
| Q6UW10 | VLLLTLGSSHGTGPGMTLQ  | Negative |
| Q6UW10 | SHGTGPGMTLQLKLKESFLT | Negative |
| Q6UW10 | LLTLGSSHGTGPGMTLQLK  | Negative |
| Q6UW10 | GPGMTLQLKLKESFLTNSY  | Negative |
| Q6UW10 | QLKLKESFLTNSYESSFLE  | Negative |
| Q6UW10 | MGSGPLVLLLTLGSSHGT   | Negative |
| Q6UW10 | GSSHGTGPGMTLQLKLKESF | Negative |
| Q6UW10 | LGSSHGTGPGMTLQLKLKES | Negative |
| Q6UW10 | LLGSSHGTGPGMTLQLKLKE | Negative |
| Q6UW10 | GSGPLVLLLTLGSSHGTG   | Negative |
| Q6UW10 | HGTGPGMTLQLKLKESFLT  | Negative |
| Q6UW10 | LKESFLTNSYESSFLELLE  | Negative |
| Q6UW10 | LTLGSSHGTGPGMTLQLKL  | Negative |



|        |                      |          |
|--------|----------------------|----------|
| Q6UW10 | TLQLKLKESFLTNSSESS   | Negative |
| Q6UW10 | SGLPLVLLLTLLGSSHGTGP | Negative |
| Q6UW10 | LVLLLTLLGSSHGTGPGMTL | Negative |
| Q6UW10 | PLVLLLTLLGSSHGTGPGMT | Negative |
| Q6UW10 | LLLTLGSSHGTGPGMTLQL  | Negative |
| Q6UW10 | LQLKLKESFLTNSSESSFL  | Negative |
| Q6UW10 | KLKESFLTNSSESSFLELL  | Negative |
| Q6UW10 | MTLQLKLKESFLTNSSESS  | Negative |
| Q6UW10 | LKLKESFLTNSSESSFLEL  | Negative |
| Q6UW10 | TLLGSSHGTGPGMTLQLKLK | Negative |
| Q6UW10 | SSHGTGPGMTLQLKLKESFL | Negative |
| Q6UW10 | GLPLVLLLTLLGSSHGTGPG | Negative |
| Q6UW15 | MLLSCLILLCQVQGEETQKE | Negative |
| Q6UW15 | MLPPMALPSVSWMLLSCLIL | Negative |
| Q6UW15 | QKELSPRISCPKGSKAYGS  | Negative |
| Q6UW15 | GEETQKELSPRISCPKGSK  | Negative |
| Q6UW15 | PPMALPSVSWMLLSCLILLC | Negative |
| Q6UW15 | SWMLLSCLILLCQVQGEETQ | Negative |
| Q6UW15 | VQGEETQKELSPRISCPKG  | Negative |
| Q6UW15 | QGEETQKELSPRISCPKGS  | Negative |
| Q6UW15 | SCLILLCQVQGEETQKELPS | Negative |
| Q6UW15 | ILLCQVQGEETQKELSPRI  | Negative |
| Q6UW15 | PSVSWMLLSCLILLCQVQGE | Negative |
| Q6UW15 | LCQVQGEETQKELSPRISC  | Negative |
| Q6UW15 | LPPMALPSVSWMLLSCLILL | Negative |
| Q6UW15 | ETQKELSPRISCPKGSKAY  | Negative |
| Q6UW15 | EETQKELSPRISCPKGSKA  | Negative |
| Q6UW15 | CQVQGEETQKELSPRISCP  | Negative |
| Q6UW15 | QVQGEETQKELSPRISCPK  | Negative |
| Q6UW15 | LLCQVQGEETQKELSPRIS  | Negative |
| Q6UW15 | SVSWMLLSCLILLCQVQGEE | Negative |
| Q6UW15 | LSCLILLCQVQGEETQKELP | Negative |
| Q6UW15 | PMALPSVSWMLLSCLILLCQ | Negative |
| Q6UW15 | LLSCLILLCQVQGEETQKEL | Negative |
| Q6UW15 | LILLCQVQGEETQKELSPR  | Negative |
| Q6UW15 | MALPSVSWMLLSCLILLCQV | Negative |
| Q6UW15 | CLILLCQVQGEETQKELPSP | Negative |
| Q6UW15 | VSWMLLSCLILLCQVQGEET | Negative |
| Q6UW15 | TQKELSPRISCPKGSKAYG  | Negative |
| Q6UW15 | LPSVSWMLLSCLILLCQVQG | Negative |
| Q6UW15 | ALPSVSWMLLSCLILLCQVQ | Negative |
| Q6UW32 | CSHGAPVAPMTPYLMLCQPH | Negative |
| Q6UW32 | HGAPVAPMTPYLMLCQPHKR | Negative |
| Q6UW32 | AVFAIFCISRLLCSHGAPVA | Negative |
| Q6UW32 | GCIVAVFAIFCISRLLCSHG | Negative |
| Q6UW32 | FCISRLLCSHGAPVAPMTPY | Negative |

|        |                      |          |
|--------|----------------------|----------|
| Q6UW32 | VAPMTPYLMLCQPHKRCGDK | Negative |
| Q6UW32 | IVAVFAIFCISRLLCSHGAP | Negative |
| Q6UW32 | RGCIVAVFAIFCISRLLCSH | Negative |
| Q6UW32 | CIVAVFAIFCISRLLCSHGA | Negative |
| Q6UW32 | MAPRGCIVAVFAIFCISRLL | Negative |
| Q6UW32 | CISRLLCSHGAPVAPMTPYL | Negative |
| Q6UW32 | APRGCIVAVFAIFCISRLLC | Negative |
| Q6UW32 | IFCISRLLCSHGAPVAPMTP | Negative |
| Q6UW32 | LCSHGAPVAPMTPYLMLCQP | Negative |
| Q6UW32 | FAIFCISRLLCSHGAPVAPM | Negative |
| Q6UW32 | SHGAPVAPMTPYLMLCQPHK | Negative |
| Q6UW32 | SRLLCSHGAPVAPMTPYLM  | Negative |
| Q6UW32 | APVAPMTPYLMLCQPHKRCG | Negative |
| Q6UW32 | ISRLLCSHGAPVAPMTPYLM | Negative |
| Q6UW32 | RLLCSHGAPVAPMTPYLMLC | Negative |
| Q6UW32 | PMTPYLMLCQPHKRCGDKFY | Negative |
| Q6UW32 | APMTPYLMLCQPHKRCGDKF | Negative |
| Q6UW32 | GAPVAPMTPYLMLCQPHKRC | Negative |
| Q6UW32 | PVAPMTPYLMLCQPHKRCGD | Negative |
| Q6UW32 | MTPYLMLCQPHKRCGDKFYD | Negative |
| Q6UW32 | VAVFAIFCISRLLCSHGAPV | Negative |
| Q6UW32 | LLCSHGAPVAPMTPYLMLCQ | Negative |
| Q6UW32 | AIFCISRLLCSHGAPVAPMT | Negative |
| Q6UW32 | PRGCIVAVFAIFCISRLLC  | Negative |
| Q6UWE3 | MAAALALVAGVLSGAVLPLW | Negative |
| Q6UWE3 | SALPQYKKKITDRCFHHSEC | Negative |
| Q6UWE3 | LPQYKKKITDRCFHHSECYS | Negative |
| Q6UWE3 | KITDRCFHHSECYSGCCLMD | Negative |
| Q6UWE3 | VAGVLSGAVLPLWSALPQYK | Negative |
| Q6UWE3 | LPLWSALPQYKKKITDRCFH | Negative |
| Q6UWE3 | QYKKKITDRCFHHSECYSGC | Negative |
| Q6UWE3 | PQYKKKITDRCFHHSECYSG | Negative |
| Q6UWE3 | YKKKITDRCFHHSECYSGCC | Negative |
| Q6UWE3 | LALVAGVLSGAVLPLWSALP | Negative |
| Q6UWE3 | VLSGAVLPLWSALPQYKKKI | Negative |
| Q6UWE3 | PLWSALPQYKKKITDRCFHH | Negative |
| Q6UWE3 | ALPQYKKKITDRCFHHSECY | Negative |
| Q6UWE3 | AGVLSGAVLPLWSALPQYKK | Negative |
| Q6UWE3 | ALVAGVLSGAVLPLWSALPQ | Negative |
| Q6UWE3 | LSGAVLPLWSALPQYKKKIT | Negative |
| Q6UWE3 | KKITDRCFHHSECYSGCCLM | Negative |
| Q6UWE3 | KKKITDRCFHHSECYSGCCL | Negative |
| Q6UWE3 | LWSALPQYKKKITDRCFHHS | Negative |
| Q6UWE3 | AAALALVAGVLSGAVLPLWS | Negative |
| Q6UWE3 | SGAVLPLWSALPQYKKKITD | Negative |
| Q6UWE3 | GAVLPLWSALPQYKKKITDR | Negative |

|        |                      |          |
|--------|----------------------|----------|
| Q6UWE3 | VLPLWSALPQYKKKITDRCF | Negative |
| Q6UWE3 | ALALVAGVLSGAVLPLWSAL | Negative |
| Q6UWE3 | WSALPQYKKKITDRCFHHSE | Negative |
| Q6UWE3 | ITDRCFHHSECYSGCCLMDL | Negative |
| Q6UWE3 | AALALVAGVLSGAVLPLWSA | Negative |
| Q6UWE3 | AVLPLWSALPQYKKKITDRC | Negative |
| Q6UWE3 | GVLSGAVLPLWSALPQYKKK | Negative |
| Q6UWK7 | RPAKAWSGRRTRLCCHRVPS | Negative |
| Q6UWK7 | FSIFSTEGKRRPAKAWSGRR | Negative |
| Q6UWK7 | CFSIFSTEGKRRPAKAWSGR | Negative |
| Q6UWK7 | SIFSTEGKRRPAKAWSGRRT | Negative |
| Q6UWK7 | CILLCFSIFSTEGKRRPAK  | Negative |
| Q6UWK7 | RRPAKAWSGRRTRLCCHRV  | Negative |
| Q6UWK7 | KRRPAKAWSGRRTRLCCHRV | Negative |
| Q6UWK7 | LVLSSLLCILLCFSIFSTE  | Negative |
| Q6UWK7 | LLVLSSLLCILLCFSIFST  | Negative |
| Q6UWK7 | EGKRRPAKAWSGRRTRLCCH | Negative |
| Q6UWK7 | AKAWSGRRTRLCCHRVSPN  | Negative |
| Q6UWK7 | KAWSGRRTRLCCHRVSPNS  | Negative |
| Q6UWK7 | LCFSIFSTEGKRRPAKAWSG | Negative |
| Q6UWK7 | ILLCFSIFSTEGKRRPAKA  | Negative |
| Q6UWK7 | LSSLLCILLCFSIFSTEGK  | Negative |
| Q6UWK7 | LLCFSIFSTEGKRRPAKAW  | Negative |
| Q6UWK7 | TEGKRRPAKAWSGRRTRLC  | Negative |
| Q6UWK7 | LLCFSIFSTEGKRRPAKAWS | Negative |
| Q6UWK7 | FSTEGKRRPAKAWSGRRTRL | Negative |
| Q6UWK7 | GKRRPAKAWSGRRTRLCCHR | Negative |
| Q6UWK7 | STEGKRRPAKAWSGRRTRLC | Negative |
| Q6UWK7 | RLLVLSSLLCILLCFSIFS  | Negative |
| Q6UWK7 | MRLVLSSLLCILLCFSIF   | Negative |
| Q6UWK7 | IFSTEGKRRPAKAWSGRRTR | Negative |
| Q6UWK7 | SSLLCILLCFSIFSTEGKR  | Negative |
| Q6UWK7 | LLCILLCFSIFSTEGKRRP  | Negative |
| Q6UWK7 | SLLCILLCFSIFSTEGKRR  | Negative |
| Q6UWK7 | VLSSLLCILLCFSIFSTEG  | Negative |
| Q6UWK7 | PAKAWSGRRTRLCCHRVSP  | Negative |
| Q6UWM5 | TSSKIPSITDPHFIDNCIEA | Negative |
| Q6UWM5 | CLVATTSSKIPSITDPHFID | Negative |
| Q6UWM5 | LGLCLVATTSSKIPSITDPH | Negative |
| Q6UWM5 | NKFSCWLGLCLVATTSSK   | Negative |
| Q6UWM5 | TDPHFIDNCIEAHNEWRGKV | Negative |
| Q6UWM5 | LCLVATTSSKIPSITDPHFI | Negative |
| Q6UWM5 | PSITDPHFIDNCIEAHNEW  | Negative |
| Q6UWM5 | DPHFIDNCIEAHNEWRGKVN | Negative |
| Q6UWM5 | FSCLWILGLCLVATTSSKIP | Negative |
| Q6UWM5 | VATTSSKIPSITDPHFIDNC | Negative |

|        |                      |          |
|--------|----------------------|----------|
| Q6UWM5 | KNKFSCLWILGLCLVATTSS | Negative |
| Q6UWM5 | KIPSITDPHFIDNCIEAHNE | Negative |
| Q6UWM5 | ITDPHFIDNCIEAHNEWRGK | Negative |
| Q6UWM5 | SSKIPSITDPHFIDNCIEAH | Negative |
| Q6UWM5 | LKNKFSCLWILGLCLVATTS | Negative |
| Q6UWM5 | ALKNKFSCLWILGLCLVATT | Negative |
| Q6UWM5 | SITDPHFIDNCIEAHNEWRG | Negative |
| Q6UWM5 | ILGLCLVATTSSKIPSITDP | Negative |
| Q6UWM5 | LVATTSSKIPSITDPHFIDN | Negative |
| Q6UWM5 | WILGLCLVATTSSKIPSITD | Negative |
| Q6UWM5 | ATTSSKIPSITDPHFIDNCI | Negative |
| Q6UWM5 | TTSSKIPSITDPHFIDNCIE | Negative |
| Q6UWM5 | SKIPSITDPHFIDNCIEAHN | Negative |
| Q6UWM5 | GLCLVATTSSKIPSITDPHF | Negative |
| Q6UWM5 | IPSITDPHFIDNCIEAHNEW | Negative |
| Q6UWM5 | MALKNKFSCLWILGLCLVAT | Negative |
| Q6UWM5 | CLWILGLCLVATTSSKIPSI | Negative |
| Q6UWM5 | LWILGLCLVATTSSKIPSIT | Negative |
| Q6UWM5 | KFSCLWILGLCLVATTSSKI | Negative |
| Q6UWN5 | VPRVILLCLFGAALCLTGSQ | Negative |
| Q6UWN5 | LCLTGSQALQCYSFEHTYFG | Negative |
| Q6UWN5 | SQALQCYSFEHTYFGPFDLR | Negative |
| Q6UWN5 | SFEHTYFGPFDLRAMKLPSI | Negative |
| Q6UWN5 | QALQCYSFEHTYFGPFDLRA | Negative |
| Q6UWN5 | CLTGSQALQCYSFEHTYFGP | Negative |
| Q6UWN5 | LTGSQALQCYSFEHTYFGPF | Negative |
| Q6UWN5 | ILLCLFGAALCLTGSQALQC | Negative |
| Q6UWN5 | MGVPRVILLCLFGAALCLTG | Negative |
| Q6UWN5 | LLCLFGAALCLTGSQALQCY | Negative |
| Q6UWN5 | RVILLCLFGAALCLTGSQAL | Negative |
| Q6UWN5 | GAALCLTGSQALQCYSFEHT | Negative |
| Q6UWN5 | FGAALCLTGSQALQCYSFEH | Negative |
| Q6UWN5 | ALQCYSFEHTYFGPFDLRAM | Negative |
| Q6UWN5 | MAMGVPRVILLCLFGAALCL | Negative |
| Q6UWN5 | GVPRVILLCLFGAALCLTGS | Negative |
| Q6UWN5 | LQCYSFEHTYFGPFDLRAMK | Negative |
| Q6UWN5 | PRVILLCLFGAALCLTGSQA | Negative |
| Q6UWN5 | VILLCLFGAALCLTGSQALQ | Negative |
| Q6UWN5 | TGSQALQCYSFEHTYFGPFD | Negative |
| Q6UWN5 | GSQALQCYSFEHTYFGPFDL | Negative |
| Q6UWN5 | QCYSFEHTYFGPFDLRAMKL | Negative |
| Q6UWN5 | CYSFEHTYFGPFDLRAMKLP | Negative |
| Q6UWN5 | ALCLTGSQALQCYSFEHTYF | Negative |
| Q6UWN5 | LFGAALCLTGSQALQCYSFE | Negative |
| Q6UWN5 | CLFGAALCLTGSQALQCYSF | Negative |
| Q6UWN5 | AALCLTGSQALQCYSFEHTY | Negative |

|        |                      |          |
|--------|----------------------|----------|
| Q6UWN5 | AMGVPRVILLCLFGAALCLT | Negative |
| Q6UWN5 | YSFEHTYFGPFDLRAMKLPS | Negative |
| Q6UWN8 | LSGMFLLLSLALFCFLTGVF | Negative |
| Q6UWN8 | FCFLTGVFSQGGQVDCGEFQ | Negative |
| Q6UWN8 | ALFCFLTGVFSQGGQVDCGE | Negative |
| Q6UWN8 | MKLSGMFLLLSLALFCFLTG | Negative |
| Q6UWN8 | MFLLSLALFCFLTGVFSQG  | Negative |
| Q6UWN8 | FLTGVFSQGGQVDCGEFQDP | Negative |
| Q6UWN8 | GVFSQGGQVDCGEFQDPKVY | Negative |
| Q6UWN8 | GMFLLLSLALFCFLTGVFSQ | Negative |
| Q6UWN8 | LALFCFLTGVFSQGGQVDCG | Negative |
| Q6UWN8 | FSQGGQVDCGEFQDPKVYCT | Negative |
| Q6UWN8 | SLALFCFLTGVFSQGGQVDC | Negative |
| Q6UWN8 | GGQVDCGEFQDPKVYCTRES | Negative |
| Q6UWN8 | QGGQVDCGEFQDPKVYCTRE | Negative |
| Q6UWN8 | LLLSLALFCFLTGVFSQGGQ | Negative |
| Q6UWN8 | TGVFSQGGQVDCGEFQDPKV | Negative |
| Q6UWN8 | DCGEFQDPKVYCTRESNPHC | Negative |
| Q6UWN8 | KLSGMFLLLSLALFCFLTGV | Negative |
| Q6UWN8 | LSLALFCFLTGVFSQGGQVD | Negative |
| Q6UWN8 | CFLTGVFSQGGQVDCGEFQD | Negative |
| Q6UWN8 | VFSQGGQVDCGEFQDPKVYC | Negative |
| Q6UWN8 | QVDCGEFQDPKVYCTRESNP | Negative |
| Q6UWN8 | VDCGEFQDPKVYCTRESNPH | Negative |
| Q6UWN8 | SQGGQVDCGEFQDPKVYCTR | Negative |
| Q6UWN8 | LFCFLTGVFSQGGQVDCGEF | Negative |
| Q6UWN8 | CGEFQDPKVYCTRESNPHCG | Negative |
| Q6UWN8 | LTGVFSQGGQVDCGEFQDPK | Negative |
| Q6UWN8 | SGMFLLLSLALFCFLTGVFS | Negative |
| Q6UWN8 | GQVDCGEFQDPKVYCTRESN | Negative |
| Q6UWN8 | FLLLSLALFCFLTGVFSQGG | Negative |
| Q6UWY5 | MVALRGASALLVLFLAAFLP | Negative |
| Q6UWY5 | AAFLPPPQCTQDPAMVHYIY | Negative |
| Q6UWY5 | MMVALRGASALLVLFLAAFL | Negative |
| Q6UWY5 | QCTQDPAMVHYIYQRFRVLE | Negative |
| Q6UWY5 | ASALLVLFLAAFLPPPQCTQ | Negative |
| Q6UWY5 | LVLFLAAFLPPPQCTQDPAM | Negative |
| Q6UWY5 | LLVLFLAAFLPPPQCTQDPA | Negative |
| Q6UWY5 | VLFLAAFLPPPQCTQDPAMV | Negative |
| Q6UWY5 | PAMVHYIYQRFRVLEQGLEK | Negative |
| Q6UWY5 | FLPPPQCTQDPAMVHYIYQR | Negative |
| Q6UWY5 | LPPPQCTQDPAMVHYIYQRF | Negative |
| Q6UWY5 | LRGASALLVLFLAAFLPPPQ | Negative |
| Q6UWY5 | ALRGASALLVLFLAAFLPPP | Negative |
| Q6UWY5 | QDPAMVHYIYQRFRVLEQGL | Negative |
| Q6UWY5 | CTQDPAMVHYIYQRFRVLEQ | Negative |

|        |                      |          |
|--------|----------------------|----------|
| Q6UWY5 | SALLVLFLAAFLPPPQCTQD | Negative |
| Q6UWY5 | LAAFLPPPQCTQDPAMVHYI | Negative |
| Q6UWY5 | DPAMVHYIYQRFRVLEQGLE | Negative |
| Q6UWY5 | ALLVLFLAAFLPPPQCTQDP | Negative |
| Q6UWY5 | GASALLVLFLAAFLPPPQCT | Negative |
| Q6UWY5 | VALRGASALLVLFLAAFLPP | Negative |
| Q6UWY5 | AMVHYIYQRFRVLEQGLEKC | Negative |
| Q6UWY5 | TQDPAMVHYIYQRFRVLEQG | Negative |
| Q6UWY5 | FLAAFLPPPQCTQDPAMVHY | Negative |
| Q6UWY5 | PPPQCTQDPAMVHYIYQRFR | Negative |
| Q6UWY5 | AFLPPPQCTQDPAMVHYIYQ | Negative |
| Q6UWY5 | RGASALLVLFLAAFLPPPQC | Negative |
| Q6UWY5 | PPQCTQDPAMVHYIYQRFRV | Negative |
| Q6UWY5 | PQCTQDPAMVHYIYQRFRVL | Negative |
| Q6UX39 | RSLPQLKPALGLPPTKLAPD | Negative |
| Q6UX39 | PPTKLAPDQGTLPNQQQSNQ | Negative |
| Q6UX39 | FCLLGSTRSLPQLKPALGLP | Negative |
| Q6UX39 | STRSLPQLKPALGLPPTKLA | Negative |
| Q6UX39 | KLAPDQGTLPNQQQSNQVFP | Negative |
| Q6UX39 | LGSTRSLPQLKPALGLPPTK | Negative |
| Q6UX39 | PTKLAPDQGTLPNQQQSNQV | Negative |
| Q6UX39 | GSTRSLPQLKPALGLPPTKL | Negative |
| Q6UX39 | LPPTKLAPDQGTLPNQQQSN | Negative |
| Q6UX39 | ILLFCLLGSTRSLPQLKPAL | Negative |
| Q6UX39 | MRSTILLFCLLGSTRSLPQL | Negative |
| Q6UX39 | TKLAPDQGTLPNQQQSNQVF | Negative |
| Q6UX39 | LFCLLGSTRSLPQLKPALGL | Negative |
| Q6UX39 | ALGLPPTKLAPDQGTLPNQQ | Negative |
| Q6UX39 | CLLGSTRSLPQLKPALGLPP | Negative |
| Q6UX39 | KPALGLPPTKLAPDQGTLPN | Negative |
| Q6UX39 | LKPALGLPPTKLAPDQGTLP | Negative |
| Q6UX39 | PQLKPALGLPPTKLAPDQGT | Negative |
| Q6UX39 | LLFCLLGSTRSLPQLKPALG | Negative |
| Q6UX39 | LLGSTRSLPQLKPALGLPPT | Negative |
| Q6UX39 | GLPPTKLAPDQGTLPNQQQS | Negative |
| Q6UX39 | TILLFCLLGSTRSLPQLKPA | Negative |
| Q6UX39 | LPQLKPALGLPPTKLAPDQG | Negative |
| Q6UX39 | LGLPPTKLAPDQGTLPNQQQ | Negative |
| Q6UX39 | QLKPALGLPPTKLAPDQGT  | Negative |
| Q6UX39 | SLPQLKPALGLPPTKLAPDQ | Negative |
| Q6UX39 | STILLFCLLGSTRSLPQLKP | Negative |
| Q6UX39 | TRSLPQLKPALGLPPTKLAP | Negative |
| Q6UX39 | PALGLPPTKLAPDQGTLPNQ | Negative |
| Q6UX52 | VSIAYKVLEVFPKGRWVLIT | Negative |
| Q6UX52 | AASSFSKAREEEITPVVSIA | Negative |
| Q6UX52 | SFSKAREEEITPVVSIAYKV | Negative |

|        |                      |          |
|--------|----------------------|----------|
| Q6UX52 | VLAASSFSKAREEEITPVVS | Negative |
| Q6UX52 | AREEEITPVVSIAYKVLEVF | Negative |
| Q6UX52 | SSFSKAREEEITPVVSIAYK | Negative |
| Q6UX52 | LAVLAASSFSKAREEEITPV | Negative |
| Q6UX52 | ITPVVSIAYKVLEVFPKGRW | Negative |
| Q6UX52 | SKAREEEITPVVSIAYKVLE | Negative |
| Q6UX52 | EEEITPVVSIAYKVLEVFPK | Negative |
| Q6UX52 | MGLPGLFCLAVLAASSFSKA | Negative |
| Q6UX52 | TPVVSIAYKVLEVFPKGRWV | Negative |
| Q6UX52 | VVSIAYKVLEVFPKGRWVLI | Negative |
| Q6UX52 | SIAYKVLEVFPKGRWVLITC | Negative |
| Q6UX52 | ASSFSKAREEEITPVVSIAY | Negative |
| Q6UX52 | CLAVLAASSFSKAREEEITP | Negative |
| Q6UX52 | LPGLFCLAVLAASSFSKARE | Negative |
| Q6UX52 | PVVSIAYKVLEVFPKGRWVL | Negative |
| Q6UX52 | GLFCLAVLAASSFSKAREEE | Negative |
| Q6UX52 | GLPGLFCLAVLAASSFSKAR | Negative |
| Q6UX52 | KAREEEITPVVSIAYKVLEV | Negative |
| Q6UX52 | FCLAVLAASSFSKAREEEIT | Negative |
| Q6UX52 | EITPVVSIAYKVLEVFPKGR | Negative |
| Q6UX52 | AVLAASSFSKAREEEITPVV | Negative |
| Q6UX52 | PGLFCLAVLAASSFSKAREE | Negative |
| Q6UX52 | EEITPVVSIAYKVLEVFPKG | Negative |
| Q6UX52 | LAASSFSKAREEEITPVVSI | Negative |
| Q6UX52 | FSKAREEEITPVVSIAYKVL | Negative |
| Q6UX52 | REEEITPVVSIAYKVLEVFP | Negative |
| Q6UXB1 | CCILALVCWITVFLQCSKG  | Negative |
| Q6UXB1 | TTDAPVGSGWLWCQPTPRCG | Negative |
| Q6UXB1 | CWITVFLQCSKGTTDAPVG  | Negative |
| Q6UXB1 | VFLQCSKGTTDAPVGSGLW  | Negative |
| Q6UXB1 | LLQCSKGTTDAPVGSGLWLC | Negative |
| Q6UXB1 | CILALVCWITVFLQCSKGT  | Negative |
| Q6UXB1 | PRCCILALVCWITVFLQCS  | Negative |
| Q6UXB1 | FLLQCSKGTTDAPVGSGLWL | Negative |
| Q6UXB1 | WITVFLQCSKGTTDAPVGS  | Negative |
| Q6UXB1 | MRPRCCILALVCWITVFLQ  | Negative |
| Q6UXB1 | TDAPVGSGLWLCQPTPRCGN | Negative |
| Q6UXB1 | TVFLQCSKGTTDAPVGSGL  | Negative |
| Q6UXB1 | RCCILALVCWITVFLQCSK  | Negative |
| Q6UXB1 | QCSKGTTDAPVGSGLWLCQP | Negative |
| Q6UXB1 | APVGSGLWLCQPTPRCGNKI | Negative |
| Q6UXB1 | VGSGLWLCQPTPRCGNKIYN | Negative |
| Q6UXB1 | ALVCWITVFLQCSKGTDA   | Negative |
| Q6UXB1 | RPRCCILALVCWITVFLQC  | Negative |
| Q6UXB1 | KGTTDAPVGSGLWLCQPTPR | Negative |
| Q6UXB1 | PVGSGLWLCQPTPRCGNKIY | Negative |

|        |                      |          |
|--------|----------------------|----------|
| Q6UXB1 | SKGTTDAPVGSGLWLCQPTP | Negative |
| Q6UXB1 | LQCSKGTTDAPVGSGLWLCQ | Negative |
| Q6UXB1 | ILALVCWITVFLLQCSKGTT | Negative |
| Q6UXB1 | DAPVGSGLWLCQPTPRCGNK | Negative |
| Q6UXB1 | ITVFLLQCSKGTTDAPVGSG | Negative |
| Q6UXB1 | CSKGTTDAPVGSGLWLCQPT | Negative |
| Q6UXB1 | VCWITVFLLQCSKGTTDAPV | Negative |
| Q6UXB1 | LALVCWITVFLLQCSKGTTD | Negative |
| Q6UXB1 | GTTDAPVGSGLWLCQPTPRC | Negative |
| Q6UXB2 | LLLLPLMLMSMVSSSLNPG  | Negative |
| Q6UXB2 | LLLLPLMLMSMVSSSLNPGV | Negative |
| Q6UXB2 | LISLLLLLPLMLMSMVSSS  | Negative |
| Q6UXB2 | ISSLLLLLPLMLMSMVSSSL | Negative |
| Q6UXB2 | LLLPLMLMSMVSSSLNPGVA | Negative |
| Q6UXB2 | VLISSLLLLLPLMLMSMVSS | Negative |
| Q6UXB2 | SMVSSSLNPGVARGHRDRGQ | Negative |
| Q6UXB2 | PGVARGHRDRGQASRRWLQE | Negative |
| Q6UXB2 | MLMSMVSSSLNPGVARGHRD | Negative |
| Q6UXB2 | LLPLMLMSMVSSSLNPGVAR | Negative |
| Q6UXB2 | GVARGHRDRGQASRRWLQEG | Negative |
| Q6UXB2 | SSSLNPGVARGHRDRGQASR | Negative |
| Q6UXB2 | MSMVSSSLNPGVARGHRDRG | Negative |
| Q6UXB2 | KVLISSLLLLLPLMLMSMVS | Negative |
| Q6UXB2 | NPGVARGHRDRGQASRRWLQ | Negative |
| Q6UXB2 | ARGHRDRGQASRRWLQEGGQ | Negative |
| Q6UXB2 | SSLLLLLPLMLMSMVSSSLN | Negative |
| Q6UXB2 | LMLMSMVSSSLNPGVARGHR | Negative |
| Q6UXB2 | LNPGVARGHRDRGQASRRWL | Negative |
| Q6UXB2 | VARGHRDRGQASRRWLQEGG | Negative |
| Q6UXB2 | MVSSSLNPGVARGHRDRGQA | Negative |
| Q6UXB2 | VSSSLNPGVARGHRDRGQAS | Negative |
| Q6UXB2 | LMSMVSSSLNPGVARGHRDR | Negative |
| Q6UXB2 | RGHRDRGQASRRWLQEGGQE | Negative |
| Q6UXB2 | MKVLISSLLLLLPLMLMSMV | Negative |
| Q6UXB2 | LPLMLMSMVSSSLNPGVARG | Negative |
| Q6UXB2 | SSLNPGVARGHRDRGQASRR | Negative |
| Q6UXB2 | SLNPGVARGHRDRGQASRRW | Negative |
| Q6UXB2 | PLMLMSMVSSSLNPGVARGH | Negative |
| Q6UXH1 | ALGLLPLLLLLPPAPEAAKK | Negative |
| Q6UXH1 | AAKKPTPCHRCRGLVDKFNQ | Negative |
| Q6UXH1 | LLLLPPAPEAAKKPTPCHR  | Negative |
| Q6UXH1 | PLLLLLPPAPEAAKKPTPCH | Negative |
| Q6UXH1 | TPCHRCRGLVDKFNQGMVDT | Negative |
| Q6UXH1 | LLLLPPAPEAAKKPTPCHRC | Negative |
| Q6UXH1 | AKKPTPCHRCRGLVDKFNQG | Negative |
| Q6UXH1 | LGLLPLLLLLPPAPEAAKKP | Negative |



|        |                      |          |
|--------|----------------------|----------|
| Q6UXH1 | LPRRAALGLLPLLLLLPPAP | Negative |
| Q6UXH1 | LLPPEAAKKTPTCHRCRG   | Negative |
| Q6UXH1 | KPTPCHRCRGLVDKFNQGMV | Negative |
| Q6UXH1 | RRAALGLLPLLLLLPPAPEA | Negative |
| Q6UXH1 | PAPEAAKKTPTCHRCRGLVD | Negative |
| Q6UXH1 | AALGLLPLLLLLPPAPEAAK | Negative |
| Q6UXH1 | RAALGLLPLLLLLPPAPEAA | Negative |
| Q6UXH1 | LLPPEAAKKTPTCHRCR    | Negative |
| Q6UXH1 | PTPCHRCRGLVDKFNQGMVD | Negative |
| Q6UXH1 | KKPTPCHRCRGLVDKFNQGM | Negative |
| Q6UXH1 | EAAKKTPTCHRCRGLVDKFN | Negative |
| Q6UXH1 | PCHRCRGLVDKFNQGMVDTA | Negative |
| Q6UXH1 | LLPLLLLLPPAPEAAKKTPT | Negative |
| Q6UXH1 | PEAAKKTPTCHRCRGLVDKF | Negative |
| Q6UXH1 | PPAPEAAKKTPTCHRCRGLV | Negative |
| Q6UXH1 | RLPRRAALGLLPLLLLLPPA | Negative |
| Q6UXH1 | PRRAALGLLPLLLLLPPAPE | Negative |
| Q6UXH1 | LPPAPEAAKKTPTCHRCRGL | Negative |
| Q6UXH1 | LPLLLLLPPAPEAAKKTPTC | Negative |
| Q6UXH1 | APEAAKKTPTCHRCRGLVDK | Negative |
| Q6UXH1 | MRLPRRAALGLLPLLLLLPP | Negative |
| Q6WN34 | SHARARPDMFCLFHGKRYSP | Negative |
| Q6WN34 | VLSSLGLALLWFPLDSHAR  | Negative |
| Q6WN34 | GLALLWFPLDSHARARPDMF | Negative |
| Q6WN34 | PDMFCLFHGKRYSPGESWHP | Negative |
| Q6WN34 | ARARPDMFCLFHGKRYSPGE | Negative |
| Q6WN34 | SSLGLALLWFPLDSHARAR  | Negative |
| Q6WN34 | MVPEVRVLSSLGLALLWFP  | Negative |
| Q6WN34 | LGLALLWFPLDSHARARPDM | Negative |
| Q6WN34 | RPDMFCLFHGKRYSPGESWH | Negative |
| Q6WN34 | LALLWFPLDSHARARPDMFC | Negative |
| Q6WN34 | DMFCLFHGKRYSPGESWHPY | Negative |
| Q6WN34 | LSSLGLALLWFPLDSHARA  | Negative |
| Q6WN34 | SLLGLALLWFPLDSHARARP | Negative |
| Q6WN34 | EVRVLSSLGLALLWFPLDS  | Negative |
| Q6WN34 | RVLSSLGLALLWFPLD SHA | Negative |
| Q6WN34 | VPEVRVLSSLGLALLWFPL  | Negative |
| Q6WN34 | DSHARARPDMFCLFHGKRY  | Negative |
| Q6WN34 | LDSHARARPDMFCLFHGKRY | Negative |
| Q6WN34 | FPLDSHARARPDMFCLFHGK | Negative |
| Q6WN34 | LLWFPLDSHARARPDMFCLF | Negative |
| Q6WN34 | ALLWFPLDSHARARPDMFCL | Negative |
| Q6WN34 | WFPLDSHARARPDMFCLFHG | Negative |
| Q6WN34 | LWFPLDSHARARPDMFCLFH | Negative |
| Q6WN34 | ARPDMFCLFHGKRYSPGESW | Negative |
| Q6WN34 | PEVRVLSSLGLALLWFPLD  | Negative |

|        |                       |          |
|--------|-----------------------|----------|
| Q6WN34 | PLDSHARARPDMFCLFHGKR  | Negative |
| Q6WN34 | RARPDMFCLFHGKRYSPGES  | Negative |
| Q6WN34 | VRVLSSLLGLALLWFPLDSH  | Negative |
| Q6WN34 | HARARPDMFCLFHGKRYSPG  | Negative |
| Q6X4U4 | FYLLPLACILMKSCLAFAKND | Negative |
| Q6X4U4 | FKNDATEILYSHVVKPVPAH  | Negative |
| Q6X4U4 | CILMKSCLAFAKNDATEILYS | Negative |
| Q6X4U4 | LACILMKSCLAFAKNDATEIL | Negative |
| Q6X4U4 | KSCLAFAKNDATEILYSHVVK | Negative |
| Q6X4U4 | LPLACILMKSCLAFAKNDATE | Negative |
| Q6X4U4 | ATEILYSHVVKPVPAHPSSN  | Negative |
| Q6X4U4 | MLPPAIHFYLLPLACILMKS  | Negative |
| Q6X4U4 | DATEILYSHVVKPVPAHPSS  | Negative |
| Q6X4U4 | LMKSCLAFAKNDATEILYSHV | Negative |
| Q6X4U4 | EILYSHVVKPVPAHPSSNST  | Negative |
| Q6X4U4 | HFYLLPLACILMKSCLAFAKN | Negative |
| Q6X4U4 | PPAIHFYLLPLACILMKSCLA | Negative |
| Q6X4U4 | AIHFYLLPLACILMKSCLAFA | Negative |
| Q6X4U4 | LAFKNDATEILYSHVVKPVP  | Negative |
| Q6X4U4 | IHFYLLPLACILMKSCLAFAK | Negative |
| Q6X4U4 | LLPLACILMKSCLAFAKNDAT | Negative |
| Q6X4U4 | PAIHFYLLPLACILMKSCLA  | Negative |
| Q6X4U4 | NDATEILYSHVVKPVPAHPS  | Negative |
| Q6X4U4 | ACILMKSCLAFAKNDATEILY | Negative |
| Q6X4U4 | TEILYSHVVKPVPAHPSSNS  | Negative |
| Q6X4U4 | MKSCLAFAKNDATEILYSHVV | Negative |
| Q6X4U4 | PLACILMKSCLAFAKNDATEI | Negative |
| Q6X4U4 | KNDATEILYSHVVKPVPAHP  | Negative |
| Q6X4U4 | CLAFAKNDATEILYSHVVKPV | Negative |
| Q6X4U4 | SCLAFAKNDATEILYSHVVKP | Negative |
| Q6X4U4 | AFKNDATEILYSHVVKPVPA  | Negative |
| Q6X4U4 | LPPAIHFYLLPLACILMKSC  | Negative |
| Q6X4U4 | ILMKSCLAFAKNDATEILYSH | Negative |
| Q6X5T3 | LLVVFLSLSGTGADFQCPSE  | Negative |
| Q6X5T3 | IFLSSGLLVVFLSLSGTGAD  | Negative |
| Q6X5T3 | VVFLSLSGTGADFQCPSEWS  | Negative |
| Q6X5T3 | LVVFLSLSGTGADFQCPSEW  | Negative |
| Q6X5T3 | LSLSGTGADFQCPSEWSAYG  | Negative |
| Q6X5T3 | FLSLSGTGADFQCPSEWSAY  | Negative |
| Q6X5T3 | FQCPSEWSAYGQHCRYAFKY  | Negative |
| Q6X5T3 | PSEWSAYGQHCRYAFKYEKS  | Negative |
| Q6X5T3 | GRFIFLSSGLLVVFLSLSGT  | Negative |
| Q6X5T3 | TGADFQCPSEWSAYGQHCRY  | Negative |
| Q6X5T3 | SLSGTGADFQCPSEWSAYGQ  | Negative |
| Q6X5T3 | LSGTGADFQCPSEWSAYGQH  | Negative |
| Q6X5T3 | SSGLLVVFLSLSGTGADFQC  | Negative |

|        |                       |          |
|--------|-----------------------|----------|
| Q6X5T3 | GTGADFQCPSEWSAYGQHICY | Negative |
| Q6X5T3 | VFLSLSGTGADFQCPSEWSA  | Negative |
| Q6X5T3 | ADFQCPSEWSAYGQHICYRAF | Negative |
| Q6X5T3 | SGTGADFQCPSEWSAYGQHC  | Negative |
| Q6X5T3 | DFQCPSEWSAYGQHICYRAFK | Negative |
| Q6X5T3 | FLSSGLLVVFLSLSGTGADF  | Negative |
| Q6X5T3 | GADFQCPSEWSAYGQHICYRA | Negative |
| Q6X5T3 | RFIFLSSGLLVVFLSLSGTG  | Negative |
| Q6X5T3 | CPSEWSAYGQHICYRAFKYEK | Negative |
| Q6X5T3 | QCPSEWSAYGQHICYRAFKYE | Negative |
| Q6X5T3 | LSSGLLVVFLSLSGTGADFQ  | Negative |
| Q6X5T3 | GLLVVFLSLSGTGADFQCPS  | Negative |
| Q6X5T3 | SEWSAYGQHICYRAFKYEKSW | Negative |
| Q6X5T3 | FIFLSSGLLVVFLSLSGTGA  | Negative |
| Q6X5T3 | MGRFIFLSSGLLVVFLSLSG  | Negative |
| Q6X5T3 | EWSAYGQHICYRAFKYEKSWA | Negative |
| Q6XE38 | MVSLALCCYQAHALVCPAVA  | Negative |
| Q6XE38 | RLSVCLLMVSLALCCYQAHA  | Negative |
| Q6XE38 | ALCCYQAHALVCPAVASEIT  | Negative |
| Q6XE38 | VCLLMVSLALCCYQAHALVC  | Negative |
| Q6XE38 | SEITVFLFLSDAAVNQLQVAK | Negative |
| Q6XE38 | YQAHALVCPAVASEITVFLF  | Negative |
| Q6XE38 | VSLALCCYQAHALVCPAVAS  | Negative |
| Q6XE38 | CCYQAHALVCPAVASEITVF  | Negative |
| Q6XE38 | LVCPAVASEITVFLFLSDAA  | Negative |
| Q6XE38 | EITVFLFLSDAAVNQLQVAKL | Negative |
| Q6XE38 | LALCCYQAHALVCPAVASEI  | Negative |
| Q6XE38 | AHALVCPAVASEITVFLFLS  | Negative |
| Q6XE38 | ALVCPAVASEITVFLFLSDA  | Negative |
| Q6XE38 | CLLMVSLALCCYQAHALVCP  | Negative |
| Q6XE38 | LSVCLLMVSLALCCYQAHAL  | Negative |
| Q6XE38 | VCPAVASEITVFLFLSDAAV  | Negative |
| Q6XE38 | VASEITVFLFLSDAAVNQLQV | Negative |
| Q6XE38 | LMVSLALCCYQAHALVCPAV  | Negative |
| Q6XE38 | PAVASEITVFLFLSDAAVN   | Negative |
| Q6XE38 | HALVCPAVASEITVFLFLSD  | Negative |
| Q6XE38 | CYQAHALVCPAVASEITVFL  | Negative |
| Q6XE38 | SVCLLMVSLALCCYQAHALV  | Negative |
| Q6XE38 | LCCYQAHALVCPAVASEITV  | Negative |
| Q6XE38 | CPAVASEITVFLFLSDAAVN  | Negative |
| Q6XE38 | MRLSVCLLMVSLALCCYQAH  | Negative |
| Q6XE38 | ASEITVFLFLSDAAVNQLQVA | Negative |
| Q6XE38 | QAHALVCPAVASEITVFLFL  | Negative |
| Q6XE38 | AVASEITVFLFLSDAAVNQLQ | Negative |
| Q6XE38 | SLALCCYQAHALVCPAVASE  | Negative |
| Q6YDN9 | WALVALFLMASSTVMAIPPR  | Negative |

|        |                      |          |
|--------|----------------------|----------|
| Q6YDN9 | STPWALVALFLMASSTVMAI | Negative |
| Q6YDN9 | VMAIPPRKAIDVPFGRNYVP | Negative |
| Q6YDN9 | ALFLMASSTVMAIPPRKAID | Negative |
| Q6YDN9 | LFLMASSTVMAIPPRKAIDV | Negative |
| Q6YDN9 | PWALVALFLMASSTVMAIPP | Negative |
| Q6YDN9 | MASSTVMAIPPRKAIDVPFG | Negative |
| Q6YDN9 | IPPRKAIDVPFGRNYVPTWA | Negative |
| Q6YDN9 | MAIPPRKAIDVPFGRNYVPT | Negative |
| Q6YDN9 | AVSSTPWALVALFLMASSTV | Negative |
| Q6YDN9 | STVMAIPPRKAIDVPFGRNY | Negative |
| Q6YDN9 | LVALFLMASSTVMAIPPRKA | Negative |
| Q6YDN9 | LMASSTVMAIPPRKAIDVPF | Negative |
| Q6YDN9 | AIDVPFGRNYVPTWAFDHQK | Negative |
| Q6YDN9 | AIPPRKAIDVPFGRNYVPTW | Negative |
| Q6YDN9 | MAVSSTPWALVALFLMASST | Negative |
| Q6YDN9 | VSSTPWALVALFLMASSTVM | Negative |
| Q6YDN9 | RKAIDVPFGRNYVPTWAFDH | Negative |
| Q6YDN9 | PPRKAIDVPFGRNYVPTWAF | Negative |
| Q6YDN9 | KAIDVPFGRNYVPTWAFDHQ | Negative |
| Q6YDN9 | TPWALVALFLMASSTVMAIP | Negative |
| Q6YDN9 | SSTPWALVALFLMASSTVMA | Negative |
| Q6YDN9 | TVMAIPPRKAIDVPFGRNYV | Negative |
| Q6YDN9 | IDVPFGRNYVPTWAFDHQKQ | Negative |
| Q6YDN9 | ASSTVMAIPPRKAIDVPFGR | Negative |
| Q6YDN9 | FLMASSTVMAIPPRKAIDVP | Negative |
| Q6YDN9 | SSTVMAIPPRKAIDVPFGRN | Negative |
| Q6YDN9 | VALFLMASSTVMAIPPRKAI | Negative |
| Q6YDN9 | PRKAIDVPFGRNYVPTWAFD | Negative |
| Q6YZY5 | LLAMASWQGMASDPSPLQDF | Negative |
| Q6YZY5 | MASDPSPLQDFCVADMHSPV | Negative |
| Q6YZY5 | LLLATLLAMASWQGMASDPS | Negative |
| Q6YZY5 | ASWQGMASDPSPLQDFCVAD | Negative |
| Q6YZY5 | QGMASDPSPLQDFCVADMHS | Negative |
| Q6YZY5 | GMASDPSPLQDFCVADMHSP | Negative |
| Q6YZY5 | MASWQGMASDPSPLQDFCVA | Negative |
| Q6YZY5 | SSFLLLATLLAMASWQGMAS | Negative |
| Q6YZY5 | SSSFLLLATLLAMASWQGMA | Negative |
| Q6YZY5 | LQDFCVADMHSPVLVNGFAC | Negative |
| Q6YZY5 | WQGMASDPSPLQDFCVADMH | Negative |
| Q6YZY5 | PLQDFCVADMHSPVLVNGFA | Negative |
| Q6YZY5 | DPSPLQDFCVADMHSPVLVN | Negative |
| Q6YZY5 | ASDPSPLQDFCVADMHSPVL | Negative |
| Q6YZY5 | TLLAMASWQGMASDPSPLQD | Negative |
| Q6YZY5 | ASSSFLLLATLLAMASWQGM | Negative |
| Q6YZY5 | SFLLLATLLAMASWQGMASD | Negative |
| Q6YZY5 | ATLLAMASWQGMASDPSPLQ | Negative |

|        |                       |          |
|--------|-----------------------|----------|
| Q6YZY5 | PSPLQDFCVADMHSPVLVNG  | Negative |
| Q6YZY5 | AMASWQGMASDPSPQLQDFCV | Negative |
| Q6YZY5 | MASSSFLLLATLLAMASWQG  | Negative |
| Q6YZY5 | FLLLATLLAMASWQGMASDP  | Negative |
| Q6YZY5 | DFCVADMHSPVLVNGFACLN  | Negative |
| Q6YZY5 | QDFCVADMHSPVLVNGFACL  | Negative |
| Q6YZY5 | SDPSPLQDFCVADMHSPVLV  | Negative |
| Q6YZY5 | SWQGMASDPSPQLQDFCVADM | Negative |
| Q6YZY5 | SPLQDFCVADMHSPVLVNGF  | Negative |
| Q6YZY5 | LATLLAMASWQGMASDPSP   | Negative |
| Q6YZY5 | LAMASWQGMASDPSPQLQDFC | Negative |
| Q6Z232 | MAALFAAAAVAQGPSASPTP  | Negative |
| Q6Z232 | PSASPTPAPKAQPPVATPPT  | Negative |
| Q6Z232 | VAMAALFAAAAVAQGPSASP  | Negative |
| Q6Z232 | VVAMAALFAAAAVAQGPSAS  | Negative |
| Q6Z232 | ARLHLVVVAMAALFAAAAVA  | Negative |
| Q6Z232 | VVVAMAALFAAAAVAQGPSA  | Negative |
| Q6Z232 | GPSASPTPAPKAQPPVATPP  | Negative |
| Q6Z232 | LVVVAMAALFAAAAVAQGPS  | Negative |
| Q6Z232 | MARLHLVVVAMAALFAAAAV  | Negative |
| Q6Z232 | AAVAQGPSASPTPAPKAQPP  | Negative |
| Q6Z232 | HLVVVAMAALFAAAAVAQGP  | Negative |
| Q6Z232 | AQGPSASPTPAPKAQPPVAT  | Negative |
| Q6Z232 | SPTPAPKAQPPVATPPTRPP  | Negative |
| Q6Z232 | SASPTPAPKAQPPVATPPTR  | Negative |
| Q6Z232 | ASPTPAPKAQPPVATPPTRP  | Negative |
| Q6Z232 | LHLVVVAMAALFAAAAVAQG  | Negative |
| Q6Z232 | AAAVAQGPSASPTPAPKAQ   | Negative |
| Q6Z232 | TPAPKAQPPVATPPTRPPAV  | Negative |
| Q6Z232 | AAAVAQGPSASPTPAPKAQP  | Negative |
| Q6Z232 | RLHLVVVAMAALFAAAAVAQ  | Negative |
| Q6Z232 | VAQGPSASPTPAPKAQPPVA  | Negative |
| Q6Z232 | FAAAAVAQGPSASPTPAPKA  | Negative |
| Q6Z232 | AALFAAAAVAQGPSASPTPA  | Negative |
| Q6Z232 | LFAAAAVAQGPSASPTPAPK  | Negative |
| Q6Z232 | AVAQGPSASPTPAPKAQPPV  | Negative |
| Q6Z232 | PAPKAQPPVATPPTRPPAVA  | Negative |
| Q6Z232 | QGPSASPTPAPKAQPPVATP  | Negative |
| Q6Z232 | AMAALFAAAAVAQGPSASPT  | Negative |
| Q6Z232 | ALFAAAAVAQGPSASPTPAP  | Negative |
| Q6ZBZ2 | LLPFSSMALTQDFCVADLTC  | Negative |
| Q6ZBZ2 | CVADLTCSDTPAGYPCKASV  | Negative |
| Q6ZBZ2 | VLLSFLLLPFSSMALTQDFC  | Negative |
| Q6ZBZ2 | LSFLLLPFSSMALTQDFCVA  | Negative |
| Q6ZBZ2 | AVMMLPVLLSFLLLPFSSMA  | Negative |
| Q6ZBZ2 | SMALTQDFCVADLTCSDTPA  | Negative |

|        |                                             |          |
|--------|---------------------------------------------|----------|
| Q6ZBZ2 | LLLPFSSMALTQDFCVADLT                        | Negative |
| Q6ZBZ2 | ALTQDFCVADLTCS DTPAGY                       | Negative |
| Q6ZBZ2 | QDFCVADLTCS DTPAGYPCK                       | Negative |
| Q6ZBZ2 | VADLTCS DTPAGYPCKASVG                       | Negative |
| Q6ZBZ2 | PFSSMALTQDFCVADLTCS D                       | Negative |
| Q6ZBZ2 | FCVADLTCS DTPAGYPCKAS                       | Negative |
| Q6ZBZ2 | FLLLPFSSMALTQDFCVADL                        | Negative |
| Q6ZBZ2 | MAKAVMMLPVLLS FLLLPFS                       | Negative |
| Q6ZBZ2 | MLPVLLS FLLLPFSSMALTQ                       | Negative |
| Q6ZBZ2 | LPFSSMALTQDFCVADLTCS                        | Negative |
| Q6ZBZ2 | LTQDFCVADLTCS DTPAGYP                       | Negative |
| Q6ZBZ2 | KAVMMLPVLLS FLLLPFSSM                       | Negative |
| Q6ZBZ2 | MALTQDFCVADLTCS DTPAG                       | Negative |
| Q6ZBZ2 | TQDFCVADLTCS DTPAGYPC                       | Negative |
| Q6ZBZ2 | SFLLLPFSSMALTQDFCVAD                        | Negative |
| Q6ZBZ2 | AKAVMMLPVLLS FLLLPFSS                       | Negative |
| Q6ZBZ2 | LPVLLS FLLLPFSSMALTQD                       | Negative |
| Q6ZBZ2 | DFCVADLTCS DTPAGYPCKA                       | Negative |
| Q6ZBZ2 | VMMLPVLLS FLLLPFSSMAL                       | Negative |
| Q6ZBZ2 | SSMALTQDFCVADLTCS DTP                       | Negative |
| Q6ZBZ2 | FSSMALTQDFCVADLTCS DT                       | Negative |
| Q6ZBZ2 | MMLPVLLS FLLLPFSSMALT                       | Negative |
| Q6ZBZ2 | LLS FLLLPFSSMALTQDFCV                       | Negative |
| Q70DJ5 | LSFGYNNFEQGDERNLILQG                        | Negative |
| Q70DJ5 | LLNKAHSLGSLSGYNNFEQ                         | Negative |
| Q70DJ5 | ILPLLSIATIF LLLLNKAHS                       | Negative |
| Q70DJ5 | SLGSLSGYNNFEQGDERNL                         | Negative |
| Q70DJ5 | SKKILPLLSIATIF LLLLNK                       | Negative |
| Q70DJ5 | KKILPLLSIATIF LLLLNKA                       | Negative |
| Q70DJ5 | LSIATIF LLLLNKAHSLGSL                       | Negative |
| Q70DJ5 | NKAHSLGSLSGYNNFEQGD                         | Negative |
| Q70DJ5 | IF LLLLNKAHSLGSLSGYNN                       | Negative |
| Q70DJ5 | MAISKKILPLLSIATIF LLL                       | Negative |
| Q70DJ5 | SLSFGYNNFEQGDERNLILQ                        | Negative |
| Q70DJ5 | HSLGSLSGYNNFEQGDERN                         | Negative |
| Q70DJ5 | KAHSLGSLSGYNNFEQGDE                         | Negative |
| Q70DJ5 | PLLSIATIF LLLLNKAHSLG                       | Negative |
| Q70DJ5 | F LLLLNKAHSLGSLSGYNN                        | Negative |
| Q70DJ5 | L LLLLNKAHSLGSLSGYNNF                       | Negative |
| Q70DJ5 | LP LLSIATIF LLLLNKAHSL                      | Negative |
| Q70DJ5 | L L L L L N K A H S L G S L S F G Y N N F E | Negative |
| Q70DJ5 | L L S I A T I F L L L L N K A H S L G S     | Negative |
| Q70DJ5 | I A T I F L L L L N K A H S L G S L S F     | Negative |
| Q70DJ5 | T I F L L L L N K A H S L G S L S F G Y     | Negative |
| Q70DJ5 | G S L S F G Y N N F E Q G D E R N L I L     | Negative |
| Q70DJ5 | A H S L G S L S F G Y N N F E Q G D E R     | Negative |

|        |                      |          |
|--------|----------------------|----------|
| Q70DJ5 | LGSLSGYNNFEQGDERNLI  | Negative |
| Q70DJ5 | AISKILPLLSIATIFLLLL  | Negative |
| Q70DJ5 | LNKAHSLGSLSGYNNFEQG  | Negative |
| Q70DJ5 | ATIFLLLLNKAHSLGSLSG  | Negative |
| Q70DJ5 | KILPLLSIATIFLLLLNKAH | Negative |
| Q70DJ5 | ISKILPLLSIATIFLLLLN  | Negative |
| Q70LM3 | NFAAILAFVSLAAVTSAPS  | Negative |
| Q70LM3 | KTTCNGVVVPDAVCCDFVP  | Negative |
| Q70LM3 | PSKTTCNGVVVPDAVCCDF  | Negative |
| Q70LM3 | FVSLAAVTSAPSKTTCNG   | Negative |
| Q70LM3 | LAAVTSAPSKTTCNGVVV   | Negative |
| Q70LM3 | ILAFVSLAAVTSAPSKTTC  | Negative |
| Q70LM3 | MAFNFAAILAFVSLAAVTS  | Negative |
| Q70LM3 | AAPSKTTCNGVVVPDAVCC  | Negative |
| Q70LM3 | NGVVVPDAVCCDFVPLAS   | Negative |
| Q70LM3 | CSNGVVVPDAVCCDFVPL   | Negative |
| Q70LM3 | VTSAAPSKTTCNGVVVPDA  | Negative |
| Q70LM3 | VSLAAVTSAPSKTTCNGV   | Negative |
| Q70LM3 | AFNFAAILAFVSLAAVTS   | Negative |
| Q70LM3 | SNGVVVPDAVCCDFVPL    | Negative |
| Q70LM3 | TTCNGVVVPDAVCCDFVPL  | Negative |
| Q70LM3 | SKTTCNGVVVPDAVCCDFV  | Negative |
| Q70LM3 | FAAILAFVSLAAVTSAPSK  | Negative |
| Q70LM3 | TCSNGVVVPDAVCCDFVPL  | Negative |
| Q70LM3 | APSKTTCNGVVVPDAVCCD  | Negative |
| Q70LM3 | AAVTSAPSKTTCNGVVVP   | Negative |
| Q70LM3 | GVVVPDAVCCDFVPLASALQ | Negative |
| Q70LM3 | AVTSAPSKTTCNGVVVPD   | Negative |
| Q70LM3 | TSAAPSKTTCNGVVVPDAV  | Negative |
| Q70LM3 | SAAPSKTTCNGVVVPDAVC  | Negative |
| Q70LM3 | AFVSLAAVTSAPSKTTCN   | Negative |
| Q70LM3 | AILAFVSLAAVTSAPSKT   | Negative |
| Q70LM3 | AAILAFVSLAAVTSAPSKT  | Negative |
| Q70LM3 | FNFAAILAFVSLAAVTSAP  | Negative |
| Q70LM3 | SLAAVTSAPSKTTCNGVV   | Negative |
| Q70YI1 | TSLATDKDKLSYSIGADLGK | Negative |
| Q70YI1 | GLAMSTAMAATDATSLATDK | Negative |
| Q70YI1 | TDKDKLSYSIGADLGKNFKN | Negative |
| Q70YI1 | LATDKDKLSYSIGADLGKNF | Negative |
| Q70YI1 | LAMSTAMAATDATSLATDKD | Negative |
| Q70YI1 | ATSLATDKDKLSYSIGADLG | Negative |
| Q70YI1 | MKMKLVTAAVMGLAMSTAMA | Negative |
| Q70YI1 | TAMAATDATSLATDKDKLSY | Negative |
| Q70YI1 | MAATDATSLATDKDKLSYSI | Negative |
| Q70YI1 | MKLVTAAMGLAMSTAMAAT  | Negative |
| Q70YI1 | KMKLVTAAMGLAMSTAMAA  | Negative |

|        |                      |          |
|--------|----------------------|----------|
| Q70YI1 | ATDKDKLSYSIGADLGKNFK | Negative |
| Q70YI1 | AMSTAMAATDATSLATDKDK | Negative |
| Q70YI1 | DATSLATDKDKLSYSIGADL | Negative |
| Q70YI1 | MGLAMSTAMAATDATSLATD | Negative |
| Q70YI1 | ATDATSLATDKDKLSYSIGA | Negative |
| Q70YI1 | TDATSLATDKDKLSYSIGAD | Negative |
| Q70YI1 | VMGLAMSTAMAATDATSLAT | Negative |
| Q70YI1 | AAVMGLAMSTAMAATDATSL | Negative |
| Q70YI1 | TAAVMGLAMSTAMAATDATS | Negative |
| Q70YI1 | STAMAATDATSLATDKDKLS | Negative |
| Q70YI1 | AATDATSLATDKDKLSYSIG | Negative |
| Q70YI1 | KLVTAAVMGLAMSTAMAATD | Negative |
| Q70YI1 | DKDKLSYSIGADLGKNFKNQ | Negative |
| Q70YI1 | AMAATDATSLATDKDKLSYS | Negative |
| Q70YI1 | AVMGLAMSTAMAATDATSLA | Negative |
| Q70YI1 | SLATDKDKLSYSIGADLGKN | Negative |
| Q70YI1 | MSTAMAATDATSLATDKDKL | Negative |
| Q70YI1 | LVTAAMGLAMSTAMAATDA  | Negative |
| Q71DJ5 | TSLTIFSALTQSHLLHGSPV | Negative |
| Q71DJ5 | PVNSLCADLIHPANYSCTEH | Negative |
| Q71DJ5 | LHGSPVNSLCADLIHPANYS | Negative |
| Q71DJ5 | LTQSHLLHGSPVNSLCADLI | Negative |
| Q71DJ5 | SHLLHGSPVNSLCADLIHPA | Negative |
| Q71DJ5 | TQSHLLHGSPVNSLCADLIH | Negative |
| Q71DJ5 | MKWLLVAVLTSLTIFSALTQ | Negative |
| Q71DJ5 | ALTQSHLLHGSPVNSLCADL | Negative |
| Q71DJ5 | QSHLLHGSPVNSLCADLIHP | Negative |
| Q71DJ5 | LTSLTIFSALTQSHLLHGSP | Negative |
| Q71DJ5 | GSPVNSLCADLIHPANYSCT | Negative |
| Q71DJ5 | SALTQSHLLHGSPVNSLCAD | Negative |
| Q71DJ5 | TIFSALTQSHLLHGSPVNSL | Negative |
| Q71DJ5 | NSLCADLIHPANYSCTEHSI | Negative |
| Q71DJ5 | AVLTSLTIFSALTQSHLLHG | Negative |
| Q71DJ5 | LLHGSPVNSLCADLIHPANY | Negative |
| Q71DJ5 | LTIFSALTQSHLLHGSPVNS | Negative |
| Q71DJ5 | LLVAVLTSLTIFSALTQSHL | Negative |
| Q71DJ5 | VNSLCADLIHPANYSCTEHS | Negative |
| Q71DJ5 | KWLLVAVLTSLTIFSALTQS | Negative |
| Q71DJ5 | HLLHGSPVNSLCADLIHPAN | Negative |
| Q71DJ5 | HGSPVNSLCADLIHPANYSC | Negative |
| Q71DJ5 | LVAVLTSLTIFSALTQSHLL | Negative |
| Q71DJ5 | VLTSLTIFSALTQSHLLHGS | Negative |
| Q71DJ5 | SLTIFSALTQSHLLHGSPVN | Negative |
| Q71DJ5 | WLLVAVLTSLTIFSALTQSH | Negative |
| Q71DJ5 | FSALTQSHLLHGSPVNSLCA | Negative |
| Q71DJ5 | IFSALTQSHLLHGSPVNSLC | Negative |



|        |                      |          |
|--------|----------------------|----------|
| Q71DJ5 | SPVNSLCADLIHPANYSCTE | Negative |
| Q71QE8 | KMMTKKNAFPFYTSYGCYCG | Negative |
| Q71QE8 | TKKNAFPFYTSYGCYCGWGG | Negative |
| Q71QE8 | TFWIVALLLVGVEGNLLQFN | Negative |
| Q71QE8 | IVALLLVGVEGNLLQFNKMI | Negative |
| Q71QE8 | MTKKNAFPFYTSYGCYCGWG | Negative |
| Q71QE8 | FWIVALLLVGVEGNLLQFNK | Negative |
| Q71QE8 | LQFNKMIKMMTKKNAFPFYT | Negative |
| Q71QE8 | KMIKMMTKKNAFPFYTSYGC | Negative |
| Q71QE8 | MMTKKNAFPFYTSYGCYCGW | Negative |
| Q71QE8 | NLLQFNKMIKMMTKKNAFPF | Negative |
| Q71QE8 | WIVALLLVGVEGNLLQFNKM | Negative |
| Q71QE8 | IKMMTKKNAFPFYTSYGCYC | Negative |
| Q71QE8 | EGNLLQFNKMIKMMTKKNAF | Negative |
| Q71QE8 | VGVEGNLLQFNKMIKMMTKK | Negative |
| Q71QE8 | VALLLVGVEGNLLQFNKMIK | Negative |
| Q71QE8 | FNKMIKMMTKKNAFPFYTSY | Negative |
| Q71QE8 | LLLVGVEGNLLQFNKMIKMM | Negative |
| Q71QE8 | GVEGNLLQFNKMIKMMTKKN | Negative |
| Q71QE8 | MIKMMTKKNAFPFYTSYGCY | Negative |
| Q71QE8 | KKNAFPFYTSYGCYCGWGGR | Negative |
| Q71QE8 | ALLLVGVEGNLLQFNKMIKM | Negative |
| Q71QE8 | GNLLQFNKMIKMMTKKNAFP | Negative |
| Q71QE8 | NKMIKMMTKKNAFPFYTSYG | Negative |
| Q71QE8 | MRTFWIVALLLVGVEGNLLQ | Negative |
| Q71QE8 | QFNKMIKMMTKKNAFPFYTS | Negative |
| Q71QE8 | LVGVEGNLLQFNKMIKMMTK | Negative |
| Q71QE8 | VEGNLLQFNKMIKMMTKKNA | Negative |
| Q71QE8 | LLQFNKMIKMMTKKNAFPFY | Negative |
| Q71QE8 | LLVGVEGNLLQFNKMIKMMT | Negative |
| Q727P6 | LMAGSALVGNAADAAKAPKK | Negative |
| Q727P6 | LFAVSLLMAGSALVGNAADA | Negative |
| Q727P6 | GNAADAAKAPKKAIELKHGT | Negative |
| Q727P6 | KAPKKAIELKHGTSKRMHVM | Negative |
| Q727P6 | GSALVGNAADAAKAPKKAIE | Negative |
| Q727P6 | VSLLMAGSALVGNAADAAKA | Negative |
| Q727P6 | AADAAKAPKKAIELKHGTSK | Negative |
| Q727P6 | LVISLFAVSLLMAGSALVGN | Negative |
| Q727P6 | VGNAADAAKAPKKAIELKHG | Negative |
| Q727P6 | SLLMAGSALVGNAADAAKAP | Negative |
| Q727P6 | MRYLVISLFAVSLLMAGSAL | Negative |
| Q727P6 | AGSALVGNAADAAKAPKKAI | Negative |
| Q727P6 | DAAKAPKKAIELKHGTSKRM | Negative |
| Q727P6 | SALVGNAADAAKAPKKAIEL | Negative |
| Q727P6 | APKKAIELKHGTSKRMHVMF | Negative |
| Q727P6 | ADAAKAPKKAIELKHGTSKR | Negative |

|        |                        |          |
|--------|------------------------|----------|
| Q727P6 | LLMAGSALVGNAADAAPKAPK  | Negative |
| Q727P6 | AKAPKKAIELKHGTSKRMHV   | Negative |
| Q727P6 | SLFAVSLLMAGSALVGNAAD   | Negative |
| Q727P6 | LVGNAADAAPKKAIELKH     | Negative |
| Q727P6 | NAADAAPKKAIELKHGTS     | Negative |
| Q727P6 | RYLVISLFAVSLLMAGSALV   | Negative |
| Q727P6 | VISLFAVSLLMAGSALVGNA   | Negative |
| Q727P6 | ALVGNAADAAPKKAIELK     | Negative |
| Q727P6 | ISLFAVSLLMAGSALVGNA    | Negative |
| Q727P6 | AAKAPKKAIELKHGTSKRMH   | Negative |
| Q727P6 | FAVSLLMAGSALVGNAADAA   | Negative |
| Q727P6 | MAGSALVGNAADAAPKKA     | Negative |
| Q727P6 | YLVISLFAVSLLMAGSALVG   | Negative |
| Q75WF2 | SEAVSCMDNKNKPVDFIVY    | Negative |
| Q75WF2 | LTAVMVGTSSEAVSCMDNKNK  | Negative |
| Q75WF2 | SCMDNKNKPVDFIVYKLPQ    | Negative |
| Q75WF2 | EAVSCMDNKNKPVDFIVYK    | Negative |
| Q75WF2 | AVSCMDNKNKPVDFIVYKL    | Negative |
| Q75WF2 | TVLTAVMVGTSSEAVSCMDNK  | Negative |
| Q75WF2 | LALTVLTAVMVGTSSEAVSCM  | Negative |
| Q75WF2 | FTFLALTVLTAVMVGTSSEAV  | Negative |
| Q75WF2 | MDNKNKPVDFIVYKLPQDS    | Negative |
| Q75WF2 | VMVGTSSEAVSCMDNKNKPV   | Negative |
| Q75WF2 | MFTFLALTVLTAVMVGTSSE   | Negative |
| Q75WF2 | VGTSSEAVSCMDNKNKPVDF   | Negative |
| Q75WF2 | GTSEAVSCMDNKNKPVDFI    | Negative |
| Q75WF2 | CMDNKNKPVDFIVYKLPQD    | Negative |
| Q75WF2 | AVMVGTSSEAVSCMDNKNKPV  | Negative |
| Q75WF2 | IMFTFLALTVLTAVMVGTSSE  | Negative |
| Q75WF2 | TSEAVSCMDNKNKPVDFIV    | Negative |
| Q75WF2 | TAVMVGTSSEAVSCMDNKNKPV | Negative |
| Q75WF2 | VLTAVMVGTSSEAVSCMDNKN  | Negative |
| Q75WF2 | SSVIMFTFLALTVLTAVMVG   | Negative |
| Q75WF2 | VSCMDNKNKPVDFIVYKLP    | Negative |
| Q75WF2 | LTVLTAVMVGTSSEAVSCMDN  | Negative |
| Q75WF2 | TFLALTVLTAVMVGTSSEAVS  | Negative |
| Q75WF2 | MVGTSSEAVSCMDNKNKPVDF  | Negative |
| Q75WF2 | MPSSVIMFTFLALTVLTAVM   | Negative |
| Q75WF2 | FLALTVLTAVMVGTSSEAVSC  | Negative |
| Q75WF2 | SVIMFTFLALTVLTAVMVGTS  | Negative |
| Q75WF2 | PSSVIMFTFLALTVLTAVMV   | Negative |
| Q75WF2 | VIMFTFLALTVLTAVMVGTS   | Negative |
| Q765P3 | PTIVSKNRWGGQQASQVQYT   | Negative |
| Q765P3 | SKNRWGGQQASQVQYTVKPL   | Negative |
| Q765P3 | VALVVAIELTLVFAGCPTIV   | Negative |
| Q765P3 | AIELTLVFAGCPTIVSKNRW   | Negative |

|        |                       |          |
|--------|-----------------------|----------|
| Q765P3 | VSKNRWGGQQASQVQYTVKP  | Negative |
| Q765P3 | WGGQQASQVQYTVKPLKYVI  | Negative |
| Q765P3 | LVVAIELTLVFAGCPTIVSK  | Negative |
| Q765P3 | TIVSKNRWGGQQASQVQYTV  | Negative |
| Q765P3 | ELTLVFAGCPTIVSKNRWGG  | Negative |
| Q765P3 | IVSKNRWGGQQASQVQYTVK  | Negative |
| Q765P3 | LVFAGCPTIVSKNRWGGQQA  | Negative |
| Q765P3 | VAIELTLVFAGCPTIVSKNR  | Negative |
| Q765P3 | AGCPTIVSKNRWGGQQASQV  | Negative |
| Q765P3 | CPTIVSKNRWGGQQASQVQY  | Negative |
| Q765P3 | GCPTIVSKNRWGGQQASQVQ  | Negative |
| Q765P3 | KAFLVALVVAIELTLVFAGC  | Negative |
| Q765P3 | FAGCPTIVSKNRWGGQQASQ  | Negative |
| Q765P3 | AFLVALVVAIELTLVFAGCP  | Negative |
| Q765P3 | FLVALVVAIELTLVFAGCPT  | Negative |
| Q765P3 | RWGGQQASQVQYTVKPLKYV  | Negative |
| Q765P3 | LTLVFAGCPTIVSKNRWGGQ  | Negative |
| Q765P3 | VVAIELTLVFAGCPTIVSKN  | Negative |
| Q765P3 | TLVFAGCPTIVSKNRWGGQQ  | Negative |
| Q765P3 | NRWGGQQASQVQYTVKPLKY  | Negative |
| Q765P3 | MKAFLVALVVAIELTLVFAG  | Negative |
| Q765P3 | ALVVAIELTLVFAGCPTIVS  | Negative |
| Q765P3 | IELTLVFAGCPTIVSKNRWG  | Negative |
| Q765P3 | VFAGCPTIVSKNRWGGQQAS  | Negative |
| Q765P3 | KNRWGGQQASQVQYTVKPLK  | Negative |
| Q765P4 | ITFFLLTEIFFYISYAEATR  | Negative |
| Q765P4 | RSGPDLCPPTIISKRDWGGNA | Negative |
| Q765P4 | TFLLTEIFFYISYAEATRS   | Negative |
| Q765P4 | PDLCPPTIISKRDWGGNAALR | Negative |
| Q765P4 | MKLATITFFLLTEIFFYISY  | Negative |
| Q765P4 | ISYAEATRSGPDLCPPTISK  | Negative |
| Q765P4 | TRSGPDLCPPTIISKRDWGGN | Negative |
| Q765P4 | TEIFFYISYAEATRSGPDL   | Negative |
| Q765P4 | FFYISYAEATRSGPDLCPPTI | Negative |
| Q765P4 | LLTEIFFYISYAEATRSGPD  | Negative |
| Q765P4 | IFFYISYAEATRSGPDLCPPT | Negative |
| Q765P4 | KLATITFFLLTEIFFYISYA  | Negative |
| Q765P4 | EATRSGPDLCPPTIISKRDWG | Negative |
| Q765P4 | GPDLCPTIISKRDWGGNAAL  | Negative |
| Q765P4 | TITFFLLTEIFFYISYAEAT  | Negative |
| Q765P4 | LTEIFFYISYAEATRSGPDL  | Negative |
| Q765P4 | FFLLTEIFFYISYAEATRSG  | Negative |
| Q765P4 | YAEATRSGPDLCPPTIISKRD | Negative |
| Q765P4 | LCPTIISKRDWGGNAALRVG  | Negative |
| Q765P4 | SGPDLCPPTIISKRDWGGNAA | Negative |
| Q765P4 | SYAEATRSGPDLCPPTISKR  | Negative |

|        |                       |          |
|--------|-----------------------|----------|
| Q765P4 | YISYAEATRSGPDLCPPTIIS | Negative |
| Q765P4 | LATITFFLLTEIFFYISYAE  | Negative |
| Q765P4 | AEATRSGPDLCPPTIISKRDW | Negative |
| Q765P4 | ATITFFLLTEIFFYISYAEA  | Negative |
| Q765P4 | ATRSGPDLCPPTIISKRDWGG | Negative |
| Q765P4 | DLCPTIISKRDWGGNAALRV  | Negative |
| Q765P4 | EIFFYISYAEATRSGPDLCP  | Negative |
| Q765P4 | FYISYAEATRSGPDLCPPTII | Negative |
| Q76BW5 | LSVAAAVAVSWLAASSAAAA  | Negative |
| Q76BW5 | VAVSWLAASSAAAAGFYEFK  | Negative |
| Q76BW5 | LAASSAAAAGFYEFKFDVVG  | Negative |
| Q76BW5 | HLALSVAAAVAVSWLAASSA  | Negative |
| Q76BW5 | SVAAAVAVSWLAASSAAAAG  | Negative |
| Q76BW5 | AVSWLAASSAAAAGFYEFKFD | Negative |
| Q76BW5 | AAAAGFYEFKFDVVGAGDHVR | Negative |
| Q76BW5 | SSAAAAGFYEFKFDVVGAGDH | Negative |
| Q76BW5 | AAAVAVSWLAASSAAAAGFY  | Negative |
| Q76BW5 | AAAGFYEFKFDVVGAGDHVRV | Negative |
| Q76BW5 | EKFDVVGAGDHVRVVSDDGK  | Negative |
| Q76BW5 | FYEFKFDVVGAGDHVRVVSDD | Negative |
| Q76BW5 | SWLAASSAAAAGFYEFKFDVV | Negative |
| Q76BW5 | KHLALSVAAAVAVSWLAASS  | Negative |
| Q76BW5 | AASSAAAAGFYEFKFDVVGAG | Negative |
| Q76BW5 | GFYEFKFDVVGAGDHVRVVS  | Negative |
| Q76BW5 | AKHLALSVAAAVAVSWLAAS  | Negative |
| Q76BW5 | AGFYEFKFDVVGAGDHVRVVS | Negative |
| Q76BW5 | MAKHLALSVAAAVAVSWLAA  | Negative |
| Q76BW5 | ALSVAAAVAVSWLAASSAAA  | Negative |
| Q76BW5 | AVAVSWLAASSAAAAGFYEFK | Negative |
| Q76BW5 | WLAASSAAAAGFYEFKFDVVG | Negative |
| Q76BW5 | AAGFYEFKFDVVGAGDHVRV  | Negative |
| Q76BW5 | YEKFDVVGAGDHVRVVSDDG  | Negative |
| Q76BW5 | LALSVAAAVAVSWLAASSAA  | Negative |
| Q76BW5 | SAAAAGFYEFKFDVVGAGDHV | Negative |
| Q76BW5 | VAAAVAVSWLAASSAAAAGF  | Negative |
| Q76BW5 | ASSAAAAGFYEFKFDVVGAGD | Negative |
| Q76BW5 | VSWLAASSAAAAGFYEFKFDV | Negative |
| Q76CA2 | ILALVVVVALISQSRPAESA  | Negative |
| Q76CA2 | MKRNILALVVVVALISQSRP  | Negative |
| Q76CA2 | SRPAESAGGTIIATLSKIPL  | Negative |
| Q76CA2 | RPAESAGGTIIATLSKIPLS  | Negative |
| Q76CA2 | KRNILALVVVVALISQSRPA  | Negative |
| Q76CA2 | LVVVVALISQSRPAESAGGT  | Negative |
| Q76CA2 | VALISQSRPAESAGGTIIAT  | Negative |
| Q76CA2 | ALISQSRPAESAGGTIIATL  | Negative |
| Q76CA2 | AESAGGTIIATLSKIPLSTL  | Negative |

|        |                      |          |
|--------|----------------------|----------|
| Q76CA2 | IATLSKIPLSTLASALNTAL | Negative |
| Q76CA2 | LISQSRPAESAGGTIIATLS | Negative |
| Q76CA2 | RNILALVVVVALISQSRPAE | Negative |
| Q76CA2 | LALVVVVALISQSRPAESAG | Negative |
| Q76CA2 | NILALVVVVALISQSRPAES | Negative |
| Q76CA2 | IIATLSKIPLSTLASALNTA | Negative |
| Q76CA2 | PAESAGGTIIATLSKIPLST | Negative |
| Q76CA2 | GTIIATLSKIPLSTLASALN | Negative |
| Q76CA2 | ESAGGTIIATLSKIPLSTLA | Negative |
| Q76CA2 | SAGGTIIATLSKIPLSTLAS | Negative |
| Q76CA2 | SQSRPAESAGGTIIATLSKI | Negative |
| Q76CA2 | AGGTIIATLSKIPLSTLASA | Negative |
| Q76CA2 | GGTIIATLSKIPLSTLASAL | Negative |
| Q76CA2 | ISQSRPAESAGGTIIATLSK | Negative |
| Q76CA2 | THATLSKIPLSTLASALNT  | Negative |
| Q76CA2 | VVALISQSRPAESAGGTIIA | Negative |
| Q76CA2 | ATLSKIPLSTLASALNTALE | Negative |
| Q76CA2 | ALVVVVALISQSRPAESAGG | Negative |
| Q76CA2 | VVVALISQSRPAESAGGTII | Negative |
| Q76CA2 | QSRPAESAGGTIIATLSKIP | Negative |
| Q76FP5 | TTLTIDPTSNWGTWEGWGV  | Negative |
| Q76FP5 | DPTSNWGTWEGWGVSLAWWA | Negative |
| Q76FP5 | PTSNWGTWEGWGVSLAWWAK | Negative |
| Q76FP5 | SNWGTWEGWGVSLAWWAKAF | Negative |
| Q76FP5 | RARADTTLTIDPTSNWGTWE | Negative |
| Q76FP5 | IDPTSNWGTWEGWGVSLAWW | Negative |
| Q76FP5 | LTIDPTSNWGTWEGWGVSLA | Negative |
| Q76FP5 | TIDPTSNWGTWEGWGVSLAW | Negative |
| Q76FP5 | MRSIVLPSLALALFSQRARA | Negative |
| Q76FP5 | IVLPSLALALFSQRARADTT | Negative |
| Q76FP5 | TLTIDPTSNWGTWEGWGVSL | Negative |
| Q76FP5 | QRARADTTLTIDPTSNWGTW | Negative |
| Q76FP5 | RADTTLTIDPTSNWGTWEGW | Negative |
| Q76FP5 | DTTLTIDPTSNWGTWEGWGV | Negative |
| Q76FP5 | ADTTLTIDPTSNWGTWEGWG | Negative |
| Q76FP5 | TSNWGTWEGWGVSLAWWAKA | Negative |
| Q76FP5 | ARADTTLTIDPTSNWGTWEG | Negative |
| Q76FP5 | SQRARADTTLTIDPTSNWGT | Negative |
| Q76FP5 | ALFSQRARADTTLTIDPTSN | Negative |
| Q76FP5 | SLALALFSQRARADTTLTID | Negative |
| Q76FP5 | SIVLPSLALALFSQRARADT | Negative |
| Q76FP5 | RSIVLPSLALALFSQRARAD | Negative |
| Q76FP5 | LALFSQRARADTTLTIDPTS | Negative |
| Q76FP5 | VLPSLALALFSQRARADTTL | Negative |
| Q76FP5 | ALALFSQRARADTTLTIDPT | Negative |
| Q76FP5 | FSQRARADTTLTIDPTSNWG | Negative |

|        |                        |          |
|--------|------------------------|----------|
| Q76FP5 | LALALFSQRRARADTTLTIDP  | Negative |
| Q76FP5 | LFSQRRARADTTLTIDPTS NW | Negative |
| Q76FP5 | PSLALALFSQRRARADTTLTI  | Negative |
| Q76IQ4 | WAKSVSAGSSFLSPSQKPQV   | Negative |
| Q76IQ4 | LWAKSVSAGSSFLSPSQKPQ   | Negative |
| Q76IQ4 | AGSSFLSPSQKPQVRQGKGK   | Negative |
| Q76IQ4 | LCTLALWAKSVSAGSSFLSP   | Negative |
| Q76IQ4 | ILMLCTLALWAKSVSAGSSF   | Negative |
| Q76IQ4 | SVSAGSSFLSPSQKPQVRQG   | Negative |
| Q76IQ4 | GLMILMLCTLALWAKSVSAG   | Negative |
| Q76IQ4 | VSAGSSFLSPSQKPQVRQGK   | Negative |
| Q76IQ4 | LALWAKSVSAGSSFLSPSQK   | Negative |
| Q76IQ4 | RNTGLMILMLCTLALWAKSV   | Negative |
| Q76IQ4 | KSVSAGSSFLSPSQKPQVRQ   | Negative |
| Q76IQ4 | LKRNTGLMILMLCTLALWAK   | Negative |
| Q76IQ4 | KRNTGLMILMLCTLALWAKS   | Negative |
| Q76IQ4 | ALWAKSVSAGSSFLSPSQKP   | Negative |
| Q76IQ4 | FLSPSQKPQVRQGKGKPPRV   | Negative |
| Q76IQ4 | CTLALWAKSVSAGSSFLSPS   | Negative |
| Q76IQ4 | NTGLMILMLCTLALWAKSVS   | Negative |
| Q76IQ4 | SSFLSPSQKPQVRQGKGKPP   | Negative |
| Q76IQ4 | AKSVSAGSSFLSPSQKPQVR   | Negative |
| Q76IQ4 | SFLSPSQKPQVRQGKGKPPR   | Negative |
| Q76IQ4 | TGLMILMLCTLALWAKSVSA   | Negative |
| Q76IQ4 | SAGSSFLSPSQKPQVRQGKG   | Negative |
| Q76IQ4 | LMILMLCTLALWAKSVSAGS   | Negative |
| Q76IQ4 | PLKRNTGLMILMLCTLALWA   | Negative |
| Q76IQ4 | MLCTLALWAKSVSAGSSFLS   | Negative |
| Q76IQ4 | MPLKRNTGLMILMLCTLALW   | Negative |
| Q76IQ4 | MILMLCTLALWAKSVSAGSS   | Negative |
| Q76IQ4 | GSSFLSPSQKPQVRQGKGKP   | Negative |
| Q76IQ4 | TLALWAKSVSAGSSFLSPSQ   | Negative |
| Q79F14 | VLAAPPSGAKAESVHNPVVL   | Negative |
| Q79F14 | CLSLILSVLAAPPSGAKAES   | Negative |
| Q79F14 | KKVLMAFIICLSLILSVLAA   | Negative |
| Q79F14 | SVLAAPPSGAKAESVHNPVV   | Negative |
| Q79F14 | FIICLSLILSVLAAPPSGAK   | Negative |
| Q79F14 | AESVHNPVVLVHGISGASYN   | Negative |
| Q79F14 | KVLMAFIICLSLILSVLAAP   | Negative |
| Q79F14 | LAAPPSGAKAESVHNPVVLV   | Negative |
| Q79F14 | AKAESVHNPVVLVHGISGAS   | Negative |
| Q79F14 | ESVHNPVVLVHGISGASYNF   | Negative |
| Q79F14 | SVHNPVVLVHGISGASYNFF   | Negative |
| Q79F14 | AAPPSGAKAESVHNPVVLVH   | Negative |
| Q79F14 | MKKVLMAFIICLSLILSVLA   | Negative |
| Q79F14 | GAKAESVHNPVVLVHGISGA   | Negative |

|        |                       |          |
|--------|-----------------------|----------|
| Q79F14 | SGAKAESVHNPVVLVHGISG  | Negative |
| Q79F14 | KAESVHNPVVLVHGISGASY  | Negative |
| Q79F14 | LSVLAAPPSGAKAESVHNPV  | Negative |
| Q79F14 | VLMAFIICLSLILSVLAAPP  | Negative |
| Q79F14 | AFIICLSLILSVLAAPPSGA  | Negative |
| Q79F14 | ILSVLAAPPSGAKAESVHNP  | Negative |
| Q79F14 | IICLSLILSVLAAPPSGAKA  | Negative |
| Q79F14 | LSLILSVLAAPPSGAKAESV  | Negative |
| Q79F14 | PSGAKAESVHNPVVLVHGIS  | Negative |
| Q79F14 | PPSGAKAESVHNPVVLVHGI  | Negative |
| Q79F14 | ICLSLILSVLAAPPSGAKAE  | Negative |
| Q79F14 | MAFIICLSLILSVLAAPPSG  | Negative |
| Q79F14 | SLILSVLAAPPSGAKAESVH  | Negative |
| Q79F14 | APPSGAKAESVHNPVVLVHG  | Negative |
| Q79F14 | LMAFIICLSLILSVLAAPPS  | Negative |
| Q7BS42 | VYSLKYCPVTGGLIAVSELA  | Negative |
| Q7BS42 | IAVSELARRVIKKTCCRRLTH | Negative |
| Q7BS42 | AVSELARRVIKKTCCRRLTHI | Negative |
| Q7BS42 | LKYCPVTGGLIAVSELARRV  | Negative |
| Q7BS42 | TGGLIAVSELARRVIKKTCT  | Negative |
| Q7BS42 | VSELARRVIKKTCCRRLTHIL | Negative |
| Q7BS42 | VIKKTCCRRLTHILLAGIPAI | Negative |
| Q7BS42 | GLIAVSELARRVIKKTCCRRL | Negative |
| Q7BS42 | RVIKKTCCRRLTHILLAGIPA | Negative |
| Q7BS42 | PVTGGLIAVSELARRVIKKT  | Negative |
| Q7BS42 | MNKVYSLKYCPVTGGLIAVS  | Negative |
| Q7BS42 | LIAVSELARRVIKKTCCRRLT | Negative |
| Q7BS42 | GGLIAVSELARRVIKKTCCR  | Negative |
| Q7BS42 | KYCPVTGGLIAVSELARRVI  | Negative |
| Q7BS42 | KKTCRRLTHILLAGIPAICL  | Negative |
| Q7BS42 | LARRVIKKTCCRRLTHILLAG | Negative |
| Q7BS42 | RRVIKKTCCRRLTHILLAGIP | Negative |
| Q7BS42 | CPVTGGLIAVSELARRVIKK  | Negative |
| Q7BS42 | SLKYCPVTGGLIAVSELARR  | Negative |
| Q7BS42 | YSLKYCPVTGGLIAVSELAR  | Negative |
| Q7BS42 | ARRVIKKTCCRRLTHILLAGI | Negative |
| Q7BS42 | ELARRVIKKTCCRRLTHILLA | Negative |
| Q7BS42 | IKKTCRRLTHILLAGIPAIC  | Negative |
| Q7BS42 | SELARRVIKKTCCRRLTHILL | Negative |
| Q7BS42 | VTGGLIAVSELARRVIKKTCT | Negative |
| Q7BS42 | NKVYSLKYCPVTGGLIAVSE  | Negative |
| Q7BS42 | YCPVTGGLIAVSELARRVIK  | Negative |
| Q7BS42 | KTCRRLTHILLAGIPAICLC  | Negative |
| Q7BS42 | TCRRLTHILLAGIPAICLCY  | Negative |
| Q7BS42 | KVYSLKYCPVTGGLIAVSEL  | Negative |
| Q7BSW5 | HITGGLIAVSELSGRVSSRA  | Negative |

|        |                        |          |
|--------|------------------------|----------|
| Q7BSW5 | LKYSHITGGLIAVSELSSGRV  | Negative |
| Q7BSW5 | SSRATGKKKKHKRILALCFLG  | Negative |
| Q7BSW5 | NKIYSLKYSHITGGLIAVSE   | Negative |
| Q7BSW5 | IYSLKYSHITGGLIAVSELS   | Negative |
| Q7BSW5 | MNKIYSLKYSHITGGLIAVS   | Negative |
| Q7BSW5 | ELSGRVSSRATGKKKKHKRIL  | Negative |
| Q7BSW5 | KIYSLKYSHITGGLIAVSEL   | Negative |
| Q7BSW5 | VSSRATGKKKKHKRILALCFL  | Negative |
| Q7BSW5 | SGRVSSRATGKKKKHKRILAL  | Negative |
| Q7BSW5 | LIAVSELSSGRVSSRATGKKK  | Negative |
| Q7BSW5 | SELSSGRVSSRATGKKKKHKRI | Negative |
| Q7BSW5 | GLIAVSELSSGRVSSRATGKK  | Negative |
| Q7BSW5 | IAVSELSSGRVSSRATGKKKH  | Negative |
| Q7BSW5 | ITGGLIAVSELSSGRVSSRAT  | Negative |
| Q7BSW5 | VSELSSGRVSSRATGKKKKHKR | Negative |
| Q7BSW5 | TGGLIAVSELSSGRVSSRATG  | Negative |
| Q7BSW5 | RVSSRATGKKKKHKRILALCF  | Negative |
| Q7BSW5 | GRVSSRATGKKKKHKRILALC  | Negative |
| Q7BSW5 | YSHITGGLIAVSELSSGRVSS  | Negative |
| Q7BSW5 | SLKYSHITGGLIAVSELSSGR  | Negative |
| Q7BSW5 | GGLIAVSELSSGRVSSRATGK  | Negative |
| Q7BSW5 | AVSELSSGRVSSRATGKKKKHK | Negative |
| Q7BSW5 | KYSHITGGLIAVSELSSGRVS  | Negative |
| Q7BSW5 | SRATGKKKKHKRILALCFLGL  | Negative |
| Q7BSW5 | RATGKKKKHKRILALCFLGLL  | Negative |
| Q7BSW5 | SHITGGLIAVSELSSGRVSSR  | Negative |
| Q7BSW5 | YSLKYSHITGGLIAVSELSG   | Negative |
| Q7BSW5 | ATGKKKKHKRILALCFLGLLQ  | Negative |
| Q7BSW5 | LSGRVSSRATGKKKKHKRILA  | Negative |
| Q7JZV0 | AVALANEDANVLRAEQQVNV   | Negative |
| Q7JZV0 | QVNVDGFAYAVELDNSVNVQ   | Negative |
| Q7JZV0 | QQVNVDGFAYAVELDNSVNV   | Negative |
| Q7JZV0 | AFACLLAVALANEDANVLRA   | Negative |
| Q7JZV0 | FIAFACLLAVALANEDANVL   | Negative |
| Q7JZV0 | AEQQVNVDGFAYAVELDNSV   | Negative |
| Q7JZV0 | IAFACLLAVALANEDANVLR   | Negative |
| Q7JZV0 | VLRAEQQVNVDGFAYAVELD   | Negative |
| Q7JZV0 | VALANEDANVLRAEQQVNVD   | Negative |
| Q7JZV0 | DANVLRAEQQVNVDGFAYAV   | Negative |
| Q7JZV0 | ANEDANVLRAEQQVNVDGFA   | Negative |
| Q7JZV0 | ACLLAVALANEDANVLRAEQ   | Negative |
| Q7JZV0 | EDANVLRAEQQVNVDGFAYA   | Negative |
| Q7JZV0 | RAEQQVNVDGFAYAVELDNS   | Negative |
| Q7JZV0 | NEDANVLRAEQQVNVDGFAY   | Negative |
| Q7JZV0 | VNVDGFAYAVELDNSVNVQQ   | Negative |
| Q7JZV0 | LAVALANEDANVLRAEQQVN   | Negative |



|        |                      |          |
|--------|----------------------|----------|
| Q7JZV0 | EQQVNVDGFAYAVELDNSVN | Negative |
| Q7JZV0 | NVLRAEQQVNVDGFAYAVEL | Negative |
| Q7JZV0 | MKFFIAFACLLAVALANEDA | Negative |
| Q7JZV0 | NVDGFAYAVELDNSVNVQQK | Negative |
| Q7JZV0 | LRAEQQVNVDGFAYAVELDN | Negative |
| Q7JZV0 | CLLAVALANEDANVLRAEQQ | Negative |
| Q7JZV0 | LLAVALANEDANVLRAEQQV | Negative |
| Q7JZV0 | ALANEDANVLRAEQQVNVDG | Negative |
| Q7JZV0 | ANVLRAEQQVNVDGFAYAVE | Negative |
| Q7JZV0 | FFIAFACLLAVALANEDANV | Negative |
| Q7JZV0 | FACLLAVALANEDANVLRAE | Negative |
| Q7JZV0 | LANEDANVLRAEQQVNVDGF | Negative |
| Q7L513 | LGCVLMAWALYLSLGVWVA  | Negative |
| Q7L513 | ALYLSLGVWVAQMMLLAASF | Negative |
| Q7L513 | FETLQCEGPVCTEESSCHTE | Negative |
| Q7L513 | SFETLQCEGPVCTEESSCHT | Negative |
| Q7L513 | AQMMLAASFETLQCEGPVCT | Negative |
| Q7L513 | VLMAWALYLSLGVWVAQML  | Negative |
| Q7L513 | LAASFETLQCEGPVCTEESS | Negative |
| Q7L513 | LLAASFETLQCEGPVCTEES | Negative |
| Q7L513 | ASFETLQCEGPVCTEESSCH | Negative |
| Q7L513 | LMAWALYLSLGVWVAQMML  | Negative |
| Q7L513 | WALYLSLGVWVAQMMLAAS  | Negative |
| Q7L513 | AASFETLQCEGPVCTEESSC | Negative |
| Q7L513 | KLGCVLMAWALYLSLGVWV  | Negative |
| Q7L513 | VAQMMLAASFETLQCEGPVC | Negative |
| Q7L513 | LYLSLGVWVAQMMLAASFE  | Negative |
| Q7L513 | MLLAASFETLQCEGPVCTEE | Negative |
| Q7L513 | LSLGVWVAQMMLAASFETL  | Negative |
| Q7L513 | VLWVAQMMLAASFETLQCEG | Negative |
| Q7L513 | AWALYLSLGVWVAQMMLAA  | Negative |
| Q7L513 | GVWVAQMMLAASFETLQCE  | Negative |
| Q7L513 | MKLGCVLMAWALYLSLGVW  | Negative |
| Q7L513 | GCVLMAWALYLSLGVWVAQ  | Negative |
| Q7L513 | CVLMAWALYLSLGVWVAQM  | Negative |
| Q7L513 | SLGVWVAQMMLAASFETLQ  | Negative |
| Q7L513 | MAWALYLSLGVWVAQMMLA  | Negative |
| Q7L513 | LGVLWVAQMMLAASFETLQC | Negative |
| Q7L513 | QMMLAASFETLQCEGPVCTE | Negative |
| Q7L513 | LWVAQMMLAASFETLQCEGP | Negative |
| Q7L513 | WVAQMMLAASFETLQCEGPV | Negative |
| Q7M3V1 | AGKEVIFIMALFIAVESSPI | Negative |
| Q7M3V1 | MAGKEVIFIMALFIAVESSP | Negative |
| Q7M3V1 | IFSFDLVCPSVTSLRVNVE  | Negative |
| Q7M3V1 | ESSPIFSFDLVCPSVTSLR  | Negative |
| Q7M3V1 | EVIFIMALFIAVESSPIFSF | Negative |

|        |                      |          |
|--------|----------------------|----------|
| Q7M3V1 | MALFIAVESSPIFSFDDLVC | Negative |
| Q7M3V1 | IFIMALFIAVESSPIFSFDD | Negative |
| Q7M3V1 | FIAVESSPIFSFDDLVCPSV | Negative |
| Q7M3V1 | PSVTSLRVNVEKNECSTKKD | Negative |
| Q7M3V1 | LFIAVESSPIFSFDDLVCPS | Negative |
| Q7M3V1 | FIMALFIAVESSPIFSFDDL | Negative |
| Q7M3V1 | VCPSVTSLRVNVEKNECSTK | Negative |
| Q7M3V1 | SPIFSFDDLVCPSVTSLRVN | Negative |
| Q7M3V1 | FDDLVCPSVTSLRVNVEKNE | Negative |
| Q7M3V1 | IMALFIAVESSPIFSFDDL  | Negative |
| Q7M3V1 | LVCPSVTSLRVNVEKNECST | Negative |
| Q7M3V1 | KEVIFIMALFIAVESSPIFS | Negative |
| Q7M3V1 | DDLVCPSVTSLRVNVEKNEC | Negative |
| Q7M3V1 | SSPIFSFDDLVCPSVTSLRV | Negative |
| Q7M3V1 | AVESSPIFSFDDLVCPSVTS | Negative |
| Q7M3V1 | IAVESSPIFSFDDLVCPSVT | Negative |
| Q7M3V1 | FSFDDLVCPSVTSLRVNVEK | Negative |
| Q7M3V1 | GKEVIFIMALFIAVESSPIF | Negative |
| Q7M3V1 | PIFSFDDLVCPSVTSLRNVN | Negative |
| Q7M3V1 | SFDDLVCPSVTSLRVNVEKN | Negative |
| Q7M3V1 | ALFIAVESSPIFSFDDLVC  | Negative |
| Q7M3V1 | CPSVTSLRVNVEKNECSTKK | Negative |
| Q7M3V1 | VESSPIFSFDDLVCPSVTS  | Negative |
| Q7M3V1 | DLVCPSVTSLRVNVEKNECS | Negative |
| Q7M413 | RLLVKRQWAEAYGEGTNREL | Negative |
| Q7M413 | ADCTSLNRLLVKRQWAEAYG | Negative |
| Q7M413 | RQWAEAYGEGTNRELLGNRI | Negative |
| Q7M413 | AYAAADCTSLNRLLVKRQWA | Negative |
| Q7M413 | IVFACLVAYAAADCTSLNRL | Negative |
| Q7M413 | AADCTSLNRLLVKRQWAEAY | Negative |
| Q7M413 | WAEAYGEGTNRELLGNRIWE | Negative |
| Q7M413 | LIVFACLVAYAAADCTSLNR | Negative |
| Q7M413 | DCTSLNRLLVKRQWAEAYGE | Negative |
| Q7M413 | LLVKRQWAEAYGEGTNRELL | Negative |
| Q7M413 | LVKRQWAEAYGEGTNRELLG | Negative |
| Q7M413 | ACLVAYAAADCTSLNRLLVK | Negative |
| Q7M413 | AAADCTSLNRLLVKRQWAEA | Negative |
| Q7M413 | VAYAAADCTSLNRLLVKRQW | Negative |
| Q7M413 | KRQWAEAYGEGTNRELLGNR | Negative |
| Q7M413 | TSLNRLLVKRQWAEAYGEGT | Negative |
| Q7M413 | YAAADCTSLNRLLVKRQWAE | Negative |
| Q7M413 | LNRLLVKRQWAEAYGEGTNR | Negative |
| Q7M413 | QWAEAYGEGTNRELLGNRIW | Negative |
| Q7M413 | LVAYAAADCTSLNRLLVKRQ | Negative |
| Q7M413 | VKRQWAEAYGEGTNRELLGN | Negative |
| Q7M413 | NRLLVKRQWAEAYGEGTNRE | Negative |

|        |                        |          |
|--------|------------------------|----------|
| Q7M413 | CTSLNRLLVKRQWAEAYGEG   | Negative |
| Q7M413 | CLVAYAAADCTSLNRLLVKR   | Negative |
| Q7M413 | SLIVFACLVAYAAADCTSLN   | Negative |
| Q7M413 | MKSLIVFACLVAYAAADCTS   | Negative |
| Q7M413 | FACLVAYAAADCTSLNRLLV   | Negative |
| Q7M413 | SLNRLLVKRQWAEAYGEGTN   | Negative |
| Q7M413 | VFACLVAYAAADCTSLNRLL   | Negative |
| Q7M418 | GLMAAASASSCCSSEDRA NV  | Negative |
| Q7M418 | AAASASSCCSSEDRA NVMHN  | Negative |
| Q7M418 | MGLMAAASASSCCSSEDRA N  | Negative |
| Q7M418 | LFVLMGLMAAASASSCCSSE   | Negative |
| Q7M418 | LMAAASASSCCSSEDRA NV   | Negative |
| Q7M418 | SSEDRA NVMHNWDAAWSAAY  | Negative |
| Q7M418 | EDRA NVMHNWDAAWSAAYS D | Negative |
| Q7M418 | HNWDAAWSAAYS DRRVALAQ  | Negative |
| Q7M418 | SSCCSSEDRA NVMHNWDAAW  | Negative |
| Q7M418 | VLMGLMAAASASSCCSSEDR   | Negative |
| Q7M418 | MHNWDAAWSAAYS DRRVALA  | Negative |
| Q7M418 | ALFVLMGLMAAASASSCCSS   | Negative |
| Q7M418 | FVLMGLMAAASASSCCSSED   | Negative |
| Q7M418 | NVMHNWDAAWSAAYS DRRVA  | Negative |
| Q7M418 | MAAASASSCCSSEDRA NVMH  | Negative |
| Q7M418 | SEDRA NVMHNWDAAWSAAYS  | Negative |
| Q7M418 | SASSCCSSEDRA NVMHNWDA  | Negative |
| Q7M418 | VMHNWDAAWSAAYS DRRVAL  | Negative |
| Q7M418 | AASASSCCSSEDRA NVMHNW  | Negative |
| Q7M418 | SCCSSEDRA NVMHNWDAAWS  | Negative |
| Q7M418 | ASASSCCSSEDRA NVMHNWD  | Negative |
| Q7M418 | CCSSEDRA NVMHNWDAAWSA  | Negative |
| Q7M418 | CSEDRA NVMHNWDAAWSAA   | Negative |
| Q7M418 | LMGLMAAASASSCCSSEDR    | Negative |
| Q7M418 | ASSCCSSEDRA NVMHNWDAA  | Negative |
| Q7M418 | RANVMHNWDAAWSAAYS DRR  | Negative |
| Q7M418 | DRANVMHNWDAAWSAAYS DR  | Negative |
| Q7M418 | ANVMHNWDAAWSAAYS DRRV  | Negative |
| Q7M418 | MIALFVLMGLMAAASASSCC   | Negative |
| Q7M419 | VCNRLEQILVKTQWAQSYGE   | Negative |
| Q7M419 | MASAVCNRLQILVKTQWAQ    | Negative |
| Q7M419 | CNRLEQILVKTQWAQSYGEA   | Negative |
| Q7M419 | VVMASAVCNRLQILVKTQW    | Negative |
| Q7M419 | WAQSYGEAENRAAFSRDLFS   | Negative |
| Q7M419 | VLIIFACLVVMASAVCNRL    | Negative |
| Q7M419 | ASAVCNRLQILVKTQWAQS    | Negative |
| Q7M419 | LVVMASAVCNRLQILVKTQ    | Negative |
| Q7M419 | EQILVKTQWAQSYGEAENRA   | Negative |
| Q7M419 | QWAQSYGEAENRAAFSRDLF   | Negative |

|        |                       |          |
|--------|-----------------------|----------|
| Q7M419 | VKTQWAQSYGEAENRAAFSR  | Negative |
| Q7M419 | IFACLVVMASAVCNRLQIL   | Negative |
| Q7M419 | FACLVVMASAVCNRLQILV   | Negative |
| Q7M419 | KTQWAQSYGEAENRAAFSRD  | Negative |
| Q7M419 | AVCNRLQILVKTQWAQSYG   | Negative |
| Q7M419 | ACLVVMASAVCNRLQILVK   | Negative |
| Q7M419 | QILVKTQWAQSYGEAENRAA  | Negative |
| Q7M419 | MKVLIIFACLVVMASAVCNR  | Negative |
| Q7M419 | NRLEQILVKTQWAQSYGEAE  | Negative |
| Q7M419 | LIIFACLVVMASAVCNRLQ   | Negative |
| Q7M419 | SAVCNRLQILVKTQWAQSY   | Negative |
| Q7M419 | LEQILVKTQWAQSYGEAENR  | Negative |
| Q7M419 | TQWAQSYGEAENRAAFSRDL  | Negative |
| Q7M419 | ILVKTQWAQSYGEAENRAAF  | Negative |
| Q7M419 | RLEQILVKTQWAQSYGEAEN  | Negative |
| Q7M419 | CLVVMASAVCNRLQILVKT   | Negative |
| Q7M419 | VMASAVCNRLQILVKTQWA   | Negative |
| Q7M419 | IIFACLVVMASAVCNRLQI   | Negative |
| Q7M419 | LVKTQWAQSYGEAENRAAFS  | Negative |
| Q7M438 | ALLSVLLIASTAQSTVTIYE  | Negative |
| Q7M438 | RLIAALLSVLLIASTAQSTV  | Negative |
| Q7M438 | STAQSTVTIYESSKPGDFDF  | Negative |
| Q7M438 | SVLLIASTAQSTVTIYESSK  | Negative |
| Q7M438 | ASTAQSTVTIYESSKPGDFD  | Negative |
| Q7M438 | QSTVTIYESSKPGDFDFYLF  | Negative |
| Q7M438 | ESSKPGDFDFYLFVQQWIYS  | Negative |
| Q7M438 | IAALLSVLLIASTAQSTVTI  | Negative |
| Q7M438 | STVTIYESSKPGDFDFYLFV  | Negative |
| Q7M438 | SKPGDFDFYLFVQQWIYSYC  | Negative |
| Q7M438 | TIYESSKPGDFDFYLFVQQW  | Negative |
| Q7M438 | GDFDFYLFVQQWIYSYCDSD  | Negative |
| Q7M438 | KPGDFDFYLFVQQWIYSYCD  | Negative |
| Q7M438 | VLLIASTAQSTVTIYESSKP  | Negative |
| Q7M438 | AALLSVLLIASTAQSTVTIY  | Negative |
| Q7M438 | TVTIYESSKPGDFDFYLFVQ  | Negative |
| Q7M438 | LLSVLLIASTAQSTVTIYES  | Negative |
| Q7M438 | TAQSTVTIYESSKPGDFDFY  | Negative |
| Q7M438 | YESSKPGDFDFYLFVQQWIY  | Negative |
| Q7M438 | SSKPGDFDFYLFVQQWIYSY  | Negative |
| Q7M438 | IASTAQSTVTIYESSKPGDF  | Negative |
| Q7M438 | MRLIAALLSVLLIASTAQST  | Negative |
| Q7M438 | VTIYESSKPGDFDFYLFVQQ  | Negative |
| Q7M438 | LIAALLSVLLIASTAQSTVT  | Negative |
| Q7M438 | LSVLLIASTAQSTVTIYESS  | Negative |
| Q7M438 | LIASTAQSTVTIYESSKPGD  | Negative |
| Q7M438 | PGDFDFYLFVQQWIYSYCDSD | Negative |

|        |                      |          |
|--------|----------------------|----------|
| Q7M438 | IYESSKPGDFDFYLFVQQWI | Negative |
| Q7M438 | AQSTVTIYESSKPGDFDFYL | Negative |
| Q7M4T0 | MYPPALTLLLTPGLVAAAIQ | Negative |
| Q7M4T0 | SSADGRYKLSSYSAPVRGTG | Negative |
| Q7M4T0 | TLLLTPGLVAAAIQPQAYAS | Negative |
| Q7M4T0 | LVAAAIQPQAYASSADGRYK | Negative |
| Q7M4T0 | AYASSADGRYKLSSYSAPVR | Negative |
| Q7M4T0 | SADGRYKLSSYSAPVRGTGT | Negative |
| Q7M4T0 | AAIQPQAYASSADGRYKLSS | Negative |
| Q7M4T0 | TPGLVAAAIQPQAYASSADG | Negative |
| Q7M4T0 | AAAIQPQAYASSADGRYKLS | Negative |
| Q7M4T0 | GRYKLSSYSAPVRGTGTPGS | Negative |
| Q7M4T0 | LLTPGLVAAAIQPQAYASS  | Negative |
| Q7M4T0 | PALTLLLTPGLVAAAIQPQA | Negative |
| Q7M4T0 | AIQPQAYASSADGRYKLSSY | Negative |
| Q7M4T0 | YASSADGRYKLSSYSAPVRG | Negative |
| Q7M4T0 | YPPALTLLLTPGLVAAAIQP | Negative |
| Q7M4T0 | ALTLLLTPGLVAAAIQPQAY | Negative |
| Q7M4T0 | GLVAAAIQPQAYASSADGRY | Negative |
| Q7M4T0 | PGLVAAAIQPQAYASSADGR | Negative |
| Q7M4T0 | QPQAYASSADGRYKLSSYSA | Negative |
| Q7M4T0 | DGRYKLSSYSAPVRGTGTPG | Negative |
| Q7M4T0 | LTLTPGLVAAAIQPQAYA   | Negative |
| Q7M4T0 | PQAYASSADGRYKLSSYSAP | Negative |
| Q7M4T0 | ADGRYKLSSYSAPVRGTGTP | Negative |
| Q7M4T0 | IQPQAYASSADGRYKLSSYS | Negative |
| Q7M4T0 | LTPGLVAAAIQPQAYASSAD | Negative |
| Q7M4T0 | QAYASSADGRYKLSSYSAPV | Negative |
| Q7M4T0 | ASSADGRYKLSSYSAPVRGT | Negative |
| Q7M4T0 | LLTPGLVAAAIQPQAYASSA | Negative |
| Q7M4T0 | VAAAIQPQAYASSADGRYKL | Negative |
| Q7MSJ8 | VLKGGNMKYWDKALLSLFMC | Negative |
| Q7MSJ8 | WDKALLSLFMCVSTLSIAAT | Negative |
| Q7MSJ8 | VSTLSIAATHAVAMEGMQMT | Negative |
| Q7MSJ8 | GNMKYWDKALLSLFMCVSTL | Negative |
| Q7MSJ8 | GWSVLKGGNMKYWDKALLSL | Negative |
| Q7MSJ8 | SLFMCVSTLSIAATHAVAME | Negative |
| Q7MSJ8 | TLSIAATHAVAMEGMQMTKE | Negative |
| Q7MSJ8 | LFMCVSTLSIAATHAVAMEG | Negative |
| Q7MSJ8 | ALLSLFMCVSTLSIAATHAV | Negative |
| Q7MSJ8 | SVLKGGNMKYWDKALLSLFM | Negative |
| Q7MSJ8 | STLSIAATHAVAMEGMQMTK | Negative |
| Q7MSJ8 | LKGGNMKYWDKALLSLFMCV | Negative |
| Q7MSJ8 | KYWDKALLSLFMCVSTLSIA | Negative |
| Q7MSJ8 | NMKYWDKALLSLFMCVSTLS | Negative |
| Q7MSJ8 | KGGNMKYWDKALLSLFMCVS | Negative |

|        |                      |          |
|--------|----------------------|----------|
| Q7MSJ8 | GGNMKYWDKALLSLFMCVST | Negative |
| Q7MSJ8 | SGWSVLKGGNMKYWDKALLS | Negative |
| Q7MSJ8 | DKALLSLFMCVSTLSIAATH | Negative |
| Q7MSJ8 | LSIAATHAVAMEGMQMTKEA | Negative |
| Q7MSJ8 | YWDKALLSLFMCVSTLSIAA | Negative |
| Q7MSJ8 | LSLFMCVSTLSIAATHAVAM | Negative |
| Q7MSJ8 | LLSLFMCVSTLSIAATHAVA | Negative |
| Q7MSJ8 | WSVLKGGNMKYWDKALLSLF | Negative |
| Q7MSJ8 | FMCVSTLSIAATHAVAMEGM | Negative |
| Q7MSJ8 | CVSTLSIAATHAVAMEGMQM | Negative |
| Q7MSJ8 | MKYWDKALLSLFMCVSTLSI | Negative |
| Q7MSJ8 | LSGWSVLKGGNMKYWDKALL | Negative |
| Q7MSJ8 | MLSGWSVLKGGNMKYWDKAL | Negative |
| Q7MSJ8 | KALLSLFMCVSTLSIAATHA | Negative |
| Q7Q7R8 | TFTQRLLVALMIFALIADLS | Negative |
| Q7Q7R8 | ASGTFTQRLLVALMIFALIA | Negative |
| Q7Q7R8 | GTFTQRLLVALMIFALIADL | Negative |
| Q7Q7R8 | LVAARPQSDAASVAAAIRY  | Negative |
| Q7Q7R8 | LLVALMIFALIADLSTLVAA | Negative |
| Q7Q7R8 | IADLSTLVAARPQSDAASV  | Negative |
| Q7Q7R8 | FTQRLLVALMIFALIADLST | Negative |
| Q7Q7R8 | MASGTFTQRLLVALMIFALI | Negative |
| Q7Q7R8 | LSTLVAARPQSDAASVAAA  | Negative |
| Q7Q7R8 | ARPQSDAASVAAAIRYLQE  | Negative |
| Q7Q7R8 | VAARPQSDAASVAAAIRYL  | Negative |
| Q7Q7R8 | STLVAARPQSDAASVAAAI  | Negative |
| Q7Q7R8 | ALMIFALIADLSTLVAARPQ | Negative |
| Q7Q7R8 | LMIFALIADLSTLVAARPQD | Negative |
| Q7Q7R8 | VALMIFALIADLSTLVAARP | Negative |
| Q7Q7R8 | RPQSDAASVAAAIRYLQEL  | Negative |
| Q7Q7R8 | FALIADLSTLVAARPQSDA  | Negative |
| Q7Q7R8 | ALIADLSTLVAARPQSDAA  | Negative |
| Q7Q7R8 | IFALIADLSTLVAARPQSD  | Negative |
| Q7Q7R8 | LVALMIFALIADLSTLVAAR | Negative |
| Q7Q7R8 | QRLLVALMIFALIADLSTLV | Negative |
| Q7Q7R8 | SGTFTQRLLVALMIFALIAD | Negative |
| Q7Q7R8 | TQRLLVALMIFALIADLSTL | Negative |
| Q7Q7R8 | AARPQSDAASVAAAIRYLQ  | Negative |
| Q7Q7R8 | LIADLSTLVAARPQSDAAS  | Negative |
| Q7Q7R8 | DLSTLVAARPQSDAASVAA  | Negative |
| Q7Q7R8 | ADLSTLVAARPQSDAASVA  | Negative |
| Q7Q7R8 | RLLVALMIFALIADLSTLVA | Negative |
| Q7Q7R8 | TLVAARPQSDAASVAAAIR  | Negative |
| Q7SZI7 | CGIASNPLFQPSLVMDMAKV | Negative |
| Q7SZI7 | DMAKVLLDNYCFPENLVGMQ | Negative |
| Q7SZI7 | LFFCGIASNPLFQPSLVMDM | Negative |

|        |                      |          |
|--------|----------------------|----------|
| Q7SZI7 | LFQPSLVMDMAKVLLDNYCF | Negative |
| Q7SZI7 | ASNPLFQPSLVMDMAKVLLD | Negative |
| Q7SZI7 | FQALTTALFFCGIASNPLFQ | Negative |
| Q7SZI7 | TALFFCGIASNPLFQPSLVM | Negative |
| Q7SZI7 | IASNPLFQPSLVMDMAKVLL | Negative |
| Q7SZI7 | PSLVMDMAKVLLDNYCFPEN | Negative |
| Q7SZI7 | NPLFQPSLVMDMAKVLLDNY | Negative |
| Q7SZI7 | TTALFFCGIASNPLFQPSLV | Negative |
| Q7SZI7 | LFQALTTALFFCGIASNPLF | Negative |
| Q7SZI7 | FQPSLVMDMAKVLLDNYCFP | Negative |
| Q7SZI7 | MDMAKVLLDNYCFPENLVGM | Negative |
| Q7SZI7 | GIASNPLFQPSLVMDMAKVL | Negative |
| Q7SZI7 | PPLFQALTTALFFCGIASNP | Negative |
| Q7SZI7 | MPPLFQALTTALFFCGIASN | Negative |
| Q7SZI7 | FCGIASNPLFQPSLVMDMAK | Negative |
| Q7SZI7 | ALFFCGIASNPLFQPSLVMD | Negative |
| Q7SZI7 | SNPLFQPSLVMDMAKVLLDN | Negative |
| Q7SZI7 | PLFQPSLVMDMAKVLLDNYC | Negative |
| Q7SZI7 | QPSLVMDMAKVLLDNYCFPE | Negative |
| Q7SZI7 | QALTTALFFCGIASNPLFQP | Negative |
| Q7SZI7 | SLVMDMAKVLLDNYCFPENL | Negative |
| Q7SZI7 | LVMDMAKVLLDNYCFPENLV | Negative |
| Q7SZI7 | VMDMAKVLLDNYCFPENLVG | Negative |
| Q7SZI7 | FFCGIASNPLFQPSLVMDMA | Negative |
| Q7SZI7 | ALTTALFFCGIASNPLFQPS | Negative |
| Q7SZI7 | PLFQALTTALFFCGIASNPL | Negative |
| Q7SZN0 | YSVSPVPKCLLLMFLGWSGL | Negative |
| Q7SZN0 | MGRYSVSPVPKCLLLMFLGW | Negative |
| Q7SZN0 | YQVNAAQLREYHIAAQLEDW | Negative |
| Q7SZN0 | LMFLGWSGLKYYQVNAAQLR | Negative |
| Q7SZN0 | LGWSGLKYYQVNAAQLREYH | Negative |
| Q7SZN0 | GLKYYQVNAAQLREYHIAAQ | Negative |
| Q7SZN0 | KCLLLMFLGWSGLKYYQVNA | Negative |
| Q7SZN0 | VSPVPKCLLLMFLGWSGLKY | Negative |
| Q7SZN0 | YYQVNAAQLREYHIAAQLED | Negative |
| Q7SZN0 | SPVPKCLLLMFLGWSGLKYY | Negative |
| Q7SZN0 | AAQLREYHIAAQLEDWDYNP | Negative |
| Q7SZN0 | CLLLMFLGWSGLKYYQVNAA | Negative |
| Q7SZN0 | KYYQVNAAQLREYHIAAQLE | Negative |
| Q7SZN0 | LLMFLGWSGLKYYQVNAAQL | Negative |
| Q7SZN0 | WSGLKYYQVNAAQLREYHIA | Negative |
| Q7SZN0 | SGLKYYQVNAAQLREYHIAA | Negative |
| Q7SZN0 | RYSVSPVPKCLLLMFLGWSG | Negative |
| Q7SZN0 | VNAAQLREYHIAAQLEDWDY | Negative |
| Q7SZN0 | LKYYQVNAAQLREYHIAAQL | Negative |
| Q7SZN0 | GWSGLKYYQVNAAQLREYHI | Negative |

|        |                       |          |
|--------|-----------------------|----------|
| Q7SZN0 | SVSPVPKCLLLMFLGWSGLK  | Negative |
| Q7SZN0 | FLGWSGLKYYYQVNAAQLREY | Negative |
| Q7SZN0 | QVNAAQLREYHIAAQLEDWD  | Negative |
| Q7SZN0 | LLLMFLGWSGLKYYYQVNAAQ | Negative |
| Q7SZN0 | PKCLLLMFLGWSGLKYYYQVN | Negative |
| Q7SZN0 | GRYSVSPVPKCLLLMFLGWS  | Negative |
| Q7SZN0 | VPKCLLLMFLGWSGLKYYYQV | Negative |
| Q7SZN0 | PVPKCLLLMFLGWSGLKYYYQ | Negative |
| Q7SZN0 | NAAQLREYHIAAQLEDWDYN  | Negative |
| Q7T045 | DWVSYDQHCHYKAFNDLKNWT | Negative |
| Q7T045 | LVVFLSLSGTGADFDCPSDW  | Negative |
| Q7T045 | DFDCPSDWVSYDQHCHYKAFN | Negative |
| Q7T045 | GTGADFDCPSDWVSYDQHCHY | Negative |
| Q7T045 | GLLVVFLSLSGTGADFDCPS  | Negative |
| Q7T045 | ADFDCPSDWVSYDQHCHYKAF | Negative |
| Q7T045 | SVSFGLLVVFLSLSGTGADF  | Negative |
| Q7T045 | PSDWVSYDQHCHYKAFNDLKN | Negative |
| Q7T045 | TGADFDCPSDWVSYDQHCHYK | Negative |
| Q7T045 | SGTGADFDCPSDWVSYDQHC  | Negative |
| Q7T045 | SFGLLVVFLSLSGTGADFDC  | Negative |
| Q7T045 | MGRFISVSFGLLVVFLSLSG  | Negative |
| Q7T045 | FLSLSGTGADFDCPSDWVSY  | Negative |
| Q7T045 | SDWVSYDQHCHYKAFNDLKNW | Negative |
| Q7T045 | LSGTGADFDCPSDWVSYDQH  | Negative |
| Q7T045 | GRFISVSFGLLVVFLSLSGT  | Negative |
| Q7T045 | FISVSFGLLVVFLSLSGTGA  | Negative |
| Q7T045 | VSFGLLVVFLSLSGTGADFD  | Negative |
| Q7T045 | FDCPSDWVSYDQHCHYKAFND | Negative |
| Q7T045 | SLSGTGADFDCPSDWVSYDQ  | Negative |
| Q7T045 | CPSDWVSYDQHCHYKAFNDLK | Negative |
| Q7T045 | VFLSLSGTGADFDCPSDWVS  | Negative |
| Q7T045 | VVFLSLSGTGADFDCPSDWV  | Negative |
| Q7T045 | ISVSFGLLVVFLSLSGTGAD  | Negative |
| Q7T045 | RFISVSFGLLVVFLSLSGTG  | Negative |
| Q7T045 | LLVVFLSLSGTGADFDCPSD  | Negative |
| Q7T045 | GADFDCPSDWVSYDQHCHYKA | Negative |
| Q7T045 | DCPSDWVSYDQHCHYKAFNDL | Negative |
| Q7T045 | LSLSGTGADFDCPSDWVSYD  | Negative |
| Q7T1K6 | IAFSLLCFAAVLQQSFGNVD  | Negative |
| Q7T1K6 | AFSLLCFAAVLQQSFGNVDF  | Negative |
| Q7T1K6 | AAVLQQSFGNVDFNSESTRR  | Negative |
| Q7T1K6 | VDFNSESTRRKKKQKEIVDL  | Negative |
| Q7T1K6 | RKKKQKEIVDLHNSLRRRV   | Negative |
| Q7T1K6 | NSESTRRKKKQKEIVDLHNS  | Negative |
| Q7T1K6 | LQQSFGNVDFNSESTRRKKK  | Negative |
| Q7T1K6 | FGNVDFNSESTRRKKKQKEI  | Negative |



|        |                      |          |
|--------|----------------------|----------|
| Q7T1K6 | CFAAVLQQSFGNVDFNSEST | Negative |
| Q7T1K6 | DFNSESTRRKKKQKEIVDLH | Negative |
| Q7T1K6 | QSFGNVDFNSESTRRKKKQK | Negative |
| Q7T1K6 | ESTRRKKKQKEIVDLHNSLR | Negative |
| Q7T1K6 | TRRKKKQKEIVDLHNSLRRR | Negative |
| Q7T1K6 | NVDFNSESTRRKKKQKEIVD | Negative |
| Q7T1K6 | MIAFSLLCFAAVLQQSFGNV | Negative |
| Q7T1K6 | QQSFGNVDFNSESTRRKKKQ | Negative |
| Q7T1K6 | FNSESTRRKKKQKEIVDLHN | Negative |
| Q7T1K6 | VLQQSFGNVDFNSESTRRKK | Negative |
| Q7T1K6 | RRKKKQKEIVDLHNSLRRRV | Negative |
| Q7T1K6 | STRRKKKQKEIVDLHNSLRR | Negative |
| Q7T1K6 | LCFAAVLQQSFGNVDFNSE  | Negative |
| Q7T1K6 | AVLQQSFGNVDFNSESTRRK | Negative |
| Q7T1K6 | LLCFAAVLQQSFGNVDFNSE | Negative |
| Q7T1K6 | FAAVLQQSFGNVDFNSESTR | Negative |
| Q7T1K6 | SFGNVDFNSESTRRKKKQKE | Negative |
| Q7T1K6 | SLLCFAAVLQQSFGNVDFNS | Negative |
| Q7T1K6 | KKKQKEIVDLHNSLRRRVSP | Negative |
| Q7T1K6 | SESTRRKKKQKEIVDLHNSL | Negative |
| Q7T1K6 | GNVDFNSESTRRKKKQKEIV | Negative |
| Q7T2I5 | VVVTIVCLDLGYTRICFNHQ | Negative |
| Q7T2I5 | SSQPQTTKTCSPGESSCYHK | Negative |
| Q7T2I5 | ICFNHQSSQPQTTKTCSPGE | Negative |
| Q7T2I5 | CLDLGYTRICFNHQSSQPQT | Negative |
| Q7T2I5 | YTRICFNHQSSQPQTTKTCS | Negative |
| Q7T2I5 | VVTIVCLDLGYTRICFNHQS | Negative |
| Q7T2I5 | LLTLVVVTIVCLDLGYTRIC | Negative |
| Q7T2I5 | VTIVCLDLGYTRICFNHQSS | Negative |
| Q7T2I5 | SQPQTTKTCSPGESSCYHKQ | Negative |
| Q7T2I5 | DLGYTRICFNHQSSQPQTTK | Negative |
| Q7T2I5 | IVCLDLGYTRICFNHQSSQP | Negative |
| Q7T2I5 | MKTLLLTLVVVTIVCLDLGY | Negative |
| Q7T2I5 | LLLTLVVVTIVCLDLGYTRI | Negative |
| Q7T2I5 | RICFNHQSSQPQTTKTCSPG | Negative |
| Q7T2I5 | LVVVTIVCLDLGYTRICFNH | Negative |
| Q7T2I5 | HQSSQPQTTKTCSPGESSCY | Negative |
| Q7T2I5 | GYTRICFNHQSSQPQTTKTC | Negative |
| Q7T2I5 | TLLLTLVVVTIVCLDLGYTR | Negative |
| Q7T2I5 | LTLVVVTIVCLDLGYTRICF | Negative |
| Q7T2I5 | TRICFNHQSSQPQTTKTCSP | Negative |
| Q7T2I5 | CFNHQSSQPQTTKTCSPGES | Negative |
| Q7T2I5 | NHQSSQPQTTKTCSPGESSC | Negative |
| Q7T2I5 | KTLLLTLVVVTIVCLDLGYT | Negative |
| Q7T2I5 | TIVCLDLGYTRICFNHQSSQ | Negative |
| Q7T2I5 | QSSQPQTTKTCSPGESSCYH | Negative |

|        |                       |          |
|--------|-----------------------|----------|
| Q7T2I5 | LDLGYTRICFNHQSSQPQTT  | Negative |
| Q7T2I5 | LGYTRICFNHQSSQPQTTKT  | Negative |
| Q7T2I5 | VCLDLGYTRICFNHQSSQPQ  | Negative |
| Q7T2I5 | FNHQSSQPQTTKTCSPGESS  | Negative |
| Q7T2Q0 | RFSLLVVFLSLSGIGAGLCC  | Negative |
| Q7T2Q0 | FLSLSGIGAGLCCPLGWSSF  | Negative |
| Q7T2Q0 | FSLLVVFLSLSGIGAGLCCP  | Negative |
| Q7T2Q0 | LSGIGAGLCCPLGWSSFDQH  | Negative |
| Q7T2Q0 | GWSSFDQHCHYKVFEPVKNWT | Negative |
| Q7T2Q0 | GLCCPLGWSSFDQHCHYKVFE | Negative |
| Q7T2Q0 | GAGLCCPLGWSSFDQHCHYKV | Negative |
| Q7T2Q0 | GRLISVRFSLLVVFLSLSGI  | Negative |
| Q7T2Q0 | LISVRFSLLVVFLSLSGIGA  | Negative |
| Q7T2Q0 | SVRFSLLVVFLSLSGIGAGL  | Negative |
| Q7T2Q0 | IGAGLCCPLGWSSFDQHCHYK | Negative |
| Q7T2Q0 | VFLSLSGIGAGLCCPLGWSS  | Negative |
| Q7T2Q0 | VVFLSLSGIGAGLCCPLGWS  | Negative |
| Q7T2Q0 | PLGWSSFDQHCHYKVFEPVKN | Negative |
| Q7T2Q0 | SGIGAGLCCPLGWSSFDQHC  | Negative |
| Q7T2Q0 | AGLCCPLGWSSFDQHCHYKVF | Negative |
| Q7T2Q0 | CCPLGWSSFDQHCHYKVFEPV | Negative |
| Q7T2Q0 | RLISVRFSLLVVFLSLSGIG  | Negative |
| Q7T2Q0 | CPLGWSSFDQHCHYKVFEPVK | Negative |
| Q7T2Q0 | LLVVFLSLSGIGAGLCCPLG  | Negative |
| Q7T2Q0 | LSLSGIGAGLCCPLGWSSFD  | Negative |
| Q7T2Q0 | LCCPLGWSSFDQHCHYKVFEP | Negative |
| Q7T2Q0 | SLSGIGAGLCCPLGWSSFDQ  | Negative |
| Q7T2Q0 | GIGAGLCCPLGWSSFDQHCHY | Negative |
| Q7T2Q0 | VRFSLLVVFLSLSGIGAGLC  | Negative |
| Q7T2Q0 | SLLVVFLSLSGIGAGLCCPL  | Negative |
| Q7T2Q0 | LGWSSFDQHCHYKVFEPVKNW | Negative |
| Q7T2Q0 | ISVRFSLLVVFLSLSGIGAG  | Negative |
| Q7T2Q0 | MGRLISVRFSLLVVFLSLSG  | Negative |
| Q7T2Q6 | LTPVSSRKRHPDCDKPPNKK  | Negative |
| Q7T2Q6 | PVSSRKRHPDCDKPPNKKRC  | Negative |
| Q7T2Q6 | RHPDCDKPPNKKRCTGHIPA  | Negative |
| Q7T2Q6 | AELTPVSSRKRHPDCDKPPN  | Negative |
| Q7T2Q6 | LLGLLTLLAELTPVSSRKRH  | Negative |
| Q7T2Q6 | PDCDKPPNKKRCTGHIPAFY  | Negative |
| Q7T2Q6 | SGSLLLLLGLLTLLAELTPV  | Negative |
| Q7T2Q6 | LLLLGLLTLLAELTPVSSRK  | Negative |
| Q7T2Q6 | SSRKRHPDCDKPPNKKRCTG  | Negative |
| Q7T2Q6 | LLTLLAELTPVSSRKRHPDC  | Negative |
| Q7T2Q6 | TLLAELTPVSSRKRHPDCDK  | Negative |
| Q7T2Q6 | RKRHPDCDKPPNKKRCTGHI  | Negative |
| Q7T2Q6 | TPVSSRKRHPDCDKPPNKKR  | Negative |

|        |                      |          |
|--------|----------------------|----------|
| Q7T2Q6 | DCDKPPNKKRCTGHIPAFYY | Negative |
| Q7T2Q6 | SSGSLLLLLGLLTLLAELTP | Negative |
| Q7T2Q6 | LAELTPVSSRKRHPDCDKPP | Negative |
| Q7T2Q6 | SRKRHPDCDKPPNKKRCTGH | Negative |
| Q7T2Q6 | LLGLLTLLAELTPVSSRKR  | Negative |
| Q7T2Q6 | MSSGSLLLLLGLLTLLAELT | Negative |
| Q7T2Q6 | ELTPVSSRKRHPDCDKPPNK | Negative |
| Q7T2Q6 | SLLLLLGLLTLLAELTPVSS | Negative |
| Q7T2Q6 | KRHPDCDKPPNKKRCTGHIP | Negative |
| Q7T2Q6 | HPDCDKPPNKKRCTGHIPAF | Negative |
| Q7T2Q6 | VSSRKRHPDCDKPPNKKRCT | Negative |
| Q7T2Q6 | LTLAELTPVSSRKRHPDCD  | Negative |
| Q7T2Q6 | GLLTLLAELTPVSSRKRHPD | Negative |
| Q7T2Q6 | LLLLLGLLTLLAELTPVSSR | Negative |
| Q7T2Q6 | LLAELTPVSSRKRHPDCDKP | Negative |
| Q7T2Q6 | GSLLLLLGLLTLLAELTPVS | Negative |
| Q7T2R1 | TGKEAVHSYAIYGCYCGWGG | Negative |
| Q7T2R1 | VEGNFFQFAEMIVKMTGKEA | Negative |
| Q7T2R1 | MAVCLIGVEGNFFQFAEMIV | Negative |
| Q7T2R1 | FQFAEMIVKMTGKEAVHSYA | Negative |
| Q7T2R1 | WIMAVCLIGVEGNFFQFAEM | Negative |
| Q7T2R1 | IVKMTGKEAVHSYAIYGCYC | Negative |
| Q7T2R1 | GVEGNFFQFAEMIVKMTGKE | Negative |
| Q7T2R1 | EGNFFQFAEMIVKMTGKEAV | Negative |
| Q7T2R1 | MRTLWIMAVCLIGVEGNFFQ | Negative |
| Q7T2R1 | EMIVKMTGKEAVHSYAIYGC | Negative |
| Q7T2R1 | VCLIGVEGNFFQFAEMIVKM | Negative |
| Q7T2R1 | KMTGKEAVHSYAIYGCYCGW | Negative |
| Q7T2R1 | MTGKEAVHSYAIYGCYCGWG | Negative |
| Q7T2R1 | GKEAVHSYAIYGCYCGWGGQ | Negative |
| Q7T2R1 | LWIMAVCLIGVEGNFFQFAE | Negative |
| Q7T2R1 | TLWIMAVCLIGVEGNFFQFA | Negative |
| Q7T2R1 | VKMTGKEAVHSYAIYGCYCG | Negative |
| Q7T2R1 | QFAEMIVKMTGKEAVHSYAI | Negative |
| Q7T2R1 | AEMIVKMTGKEAVHSYAIYG | Negative |
| Q7T2R1 | NFFQFAEMIVKMTGKEAVHS | Negative |
| Q7T2R1 | GNFFQFAEMIVKMTGKEAVH | Negative |
| Q7T2R1 | AVCLIGVEGNFFQFAEMIVK | Negative |
| Q7T2R1 | CLIGVEGNFFQFAEMIVKMT | Negative |
| Q7T2R1 | IMAVCLIGVEGNFFQFAEMI | Negative |
| Q7T2R1 | IGVEGNFFQFAEMIVKMTGK | Negative |
| Q7T2R1 | FAEMIVKMTGKEAVHSYAIY | Negative |
| Q7T2R1 | MIVKMTGKEAVHSYAIYGCY | Negative |
| Q7T2R1 | LIGVEGNFFQFAEMIVKMTG | Negative |
| Q7T2R1 | FFQFAEMIVKMTGKEAVHSY | Negative |
| Q7TMF5 | GLFLAGLLTVKGLLQDRDAP | Negative |

|        |                       |          |
|--------|-----------------------|----------|
| Q7TMF5 | TRMLDLGLFLAGLLTVKGLL  | Negative |
| Q7TMF5 | RDAPDMYDSPVRVQEWRGKK  | Negative |
| Q7TMF5 | LGLFLAGLLTVKGLLQDRDA  | Negative |
| Q7TMF5 | GLLTVKGLLQDRDAPDMYDS  | Negative |
| Q7TMF5 | DAPDMYDSPVRVQEWRGKKD  | Negative |
| Q7TMF5 | RMLDLGLFLAGLLTVKGLLQ  | Negative |
| Q7TMF5 | LAGLLTVKGLLQDRDAPDMY  | Negative |
| Q7TMF5 | VKGLLQDRDAPDMYDSPVRV  | Negative |
| Q7TMF5 | QDRDAPDMYDSPVRVQEWRG  | Negative |
| Q7TMF5 | PDMYDSPVRVQEWRGKKDAR  | Negative |
| Q7TMF5 | LDLGLFLAGLLTVKGLLQDR  | Negative |
| Q7TMF5 | LLTVKGLLQDRDAPDMYDSP  | Negative |
| Q7TMF5 | LTVKGLLQDRDAPDMYDSPV  | Negative |
| Q7TMF5 | KGLLQDRDAPDMYDSPVRVQ  | Negative |
| Q7TMF5 | TVKGLLQDRDAPDMYDSPVR  | Negative |
| Q7TMF5 | MYDSPVRVQEWRGKKDARQL  | Negative |
| Q7TMF5 | LFLAGLLTVKGLLQDRDAPD  | Negative |
| Q7TMF5 | DMYDSPVRVQEWRGKKDARQ  | Negative |
| Q7TMF5 | LQDRDAPDMYDSPVRVQEW   | Negative |
| Q7TMF5 | GLLQDRDAPDMYDSPVRVQE  | Negative |
| Q7TMF5 | FLAGLLTVKGLLQDRDAPDM  | Negative |
| Q7TMF5 | APDMYDSPVRVQEWRGKKDA  | Negative |
| Q7TMF5 | DRDAPDMYDSPVRVQEWRGK  | Negative |
| Q7TMF5 | MLDLGLFLAGLLTVKGLLQD  | Negative |
| Q7TMF5 | MTRMLDLGLFLAGLLTVKGL  | Negative |
| Q7TMF5 | LLQDRDAPDMYDSPVRVQEW  | Negative |
| Q7TMF5 | YDSPVRVQEWRGKKDARQLA  | Negative |
| Q7TMF5 | AGLLTVKGLLQDRDAPDMYD  | Negative |
| Q7TQN3 | MCAPGYHRFWFWGLLLLLLL  | Negative |
| Q7TQN3 | GYHRFWFWGLLLLLLLLEAP  | Negative |
| Q7TQN3 | FWGLLLLLLLLEAPLRGLAL  | Negative |
| Q7TQN3 | RGLALPPIRYSHAGICPNDM  | Negative |
| Q7TQN3 | ALPPIRYSHAGICPNDMNPN  | Negative |
| Q7TQN3 | LRGLALPPIRYSHAGICPND  | Negative |
| Q7TQN3 | RFWFWGLLLLLLLLEAPLRG  | Negative |
| Q7TQN3 | APLRGLALPPIRYSHAGICP  | Negative |
| Q7TQN3 | FWFWGLLLLLLLLEAPLRGL  | Negative |
| Q7TQN3 | LLEAPLRGLALPPIRYSHAG  | Negative |
| Q7TQN3 | LLLLLEAPLRGLALPPIRYS  | Negative |
| Q7TQN3 | LLLLLEAPLRGLALPPIRYSH | Negative |
| Q7TQN3 | WFHWGLLLLLLLLEAPLRGLA | Negative |
| Q7TQN3 | LLLLLLEAPLRGLALPPIRY  | Negative |
| Q7TQN3 | HWGLLLLLLLLEAPLRGLALP | Negative |
| Q7TQN3 | CAPGYHRFWFWGLLLLLLL   | Negative |
| Q7TQN3 | YHRFWFWGLLLLLLLLEAPL  | Negative |
| Q7TQN3 | PLRGLALPPIRYSHAGICPN  | Negative |

|        |                       |          |
|--------|-----------------------|----------|
| Q7TQN3 | LPPIRYSHAGICPNDMNP    | Negative |
| Q7TQN3 | GLALPPIRYSHAGICPNDMN  | Negative |
| Q7TQN3 | WGLLLLLLLEAPLRGLALPP  | Negative |
| Q7TQN3 | PGYHRFWFWHGLLLLLLLEA  | Negative |
| Q7TQN3 | APGYHRFWFWHGLLLLLLLE  | Negative |
| Q7TQN3 | EAPLRGLALPPIRYSHAGIC  | Negative |
| Q7TQN3 | LALPPIRYSHAGICPNDMNP  | Negative |
| Q7TQN3 | LEAPLRGLALPPIRYSHAGI  | Negative |
| Q7TQN3 | GLLLLLLLEAPLRGLALPPI  | Negative |
| Q7TQN3 | LLLEAPLRGLALPPIRYSHA  | Negative |
| Q7TQN3 | HRFWFWHGLLLLLLLEAPLR  | Negative |
| Q7YT16 | KTFTRCSLAREMYALGVPKS  | Negative |
| Q7YT16 | GKTFTRCSLAREMYALGVPK  | Negative |
| Q7YT16 | FFIVLVAALALAAPAMGKTF  | Negative |
| Q7YT16 | APAMGKTFTRCSLAREMYAL  | Negative |
| Q7YT16 | MKFFIVLVAALALAAPAMGK  | Negative |
| Q7YT16 | VLVAALALAAPAMGKTFTRC  | Negative |
| Q7YT16 | AMGKTFTRCSLAREMYALGV  | Negative |
| Q7YT16 | LVAALALAAPAMGKTFTRCS  | Negative |
| Q7YT16 | FIVLVAALALAAPAMGKTFT  | Negative |
| Q7YT16 | AAPAMGKTFTRCSLAREMYA  | Negative |
| Q7YT16 | EMYALGVPKSELPQWTCIAE  | Negative |
| Q7YT16 | REMYALGVPKSELPQWTCIA  | Negative |
| Q7YT16 | TRCSLAREMYALGVPKSELP  | Negative |
| Q7YT16 | VAALALAAPAMGKTFTRCSL  | Negative |
| Q7YT16 | PAMGKTFTRCSLAREMYALG  | Negative |
| Q7YT16 | LAREMYALGVPKSELPQWTC  | Negative |
| Q7YT16 | FTRCSLAREMYALGVPKSEL  | Negative |
| Q7YT16 | TFTRCSLAREMYALGVPKSE  | Negative |
| Q7YT16 | LAAPAMGKTFTRCSLAREMY  | Negative |
| Q7YT16 | ALALAAPAMGKTFTRCSLAR  | Negative |
| Q7YT16 | LALAAPAMGKTFTRCSLARE  | Negative |
| Q7YT16 | ALAAPAMGKTFTRCSLAREM  | Negative |
| Q7YT16 | RCSLAREMYALGVPKSELPQ  | Negative |
| Q7YT16 | MGKTFTRCSLAREMYALGVP  | Negative |
| Q7YT16 | KFFIVLVAALALAAPAMGKT  | Negative |
| Q7YT16 | AREMYALGVPKSELPQWTCI  | Negative |
| Q7YT16 | AALALAAPAMGKTFTRCSLA  | Negative |
| Q7YT16 | SLAREMYALGVPKSELPQWT  | Negative |
| Q7YT16 | CSLAREMYALGVPKSELPQW  | Negative |
| Q7YXD3 | LLFMTGVESLKDGYIVNDIN  | Negative |
| Q7YXD3 | VESLKDGYIVNDINCTYFCG  | Negative |
| Q7YXD3 | NCTYFCGRNAYCNELCIKLK  | Negative |
| Q7YXD3 | LKDGYIVNDINCTYFCGRNA  | Negative |
| Q7YXD3 | LVMISLALLFMTGVESLKDGD | Negative |
| Q7YXD3 | GVESLKDGYIVNDINCTYFC  | Negative |

|        |                       |          |
|--------|-----------------------|----------|
| Q7YXD3 | GYIVNDINCTYFCGRNAYCN  | Negative |
| Q7YXD3 | LALLFMTGVESLKDGYIVND  | Negative |
| Q7YXD3 | MNYLVMISLALLFMTGVESL  | Negative |
| Q7YXD3 | SLKDGIVNDINCTYFCGRN   | Negative |
| Q7YXD3 | NYLVMISLALLFMTGVESLK  | Negative |
| Q7YXD3 | SLALLFMTGVESLKDGYIVN  | Negative |
| Q7YXD3 | KDGIVNDINCTYFCGRNAY   | Negative |
| Q7YXD3 | INCTYFCGRNAYCNELCIKL  | Negative |
| Q7YXD3 | FMTGVESLKDGYIVNDINCT  | Negative |
| Q7YXD3 | ISLALLFMTGVESLKDGYIV  | Negative |
| Q7YXD3 | YLVMSLALLFMTGVESLKD   | Negative |
| Q7YXD3 | ALLFMTGVESLKDGYIVNDI  | Negative |
| Q7YXD3 | NDINCTYFCGRNAYCNELCI  | Negative |
| Q7YXD3 | DINCTYFCGRNAYCNELCIK  | Negative |
| Q7YXD3 | MTGVESLKDGYIVNDINCTY  | Negative |
| Q7YXD3 | VNDINCTYFCGRNAYCNELC  | Negative |
| Q7YXD3 | DGYIVNDINCTYFCGRNAYC  | Negative |
| Q7YXD3 | YIVNDINCTYFCGRNAYCNE  | Negative |
| Q7YXD3 | TGVESLKDGYIVNDINCTYF  | Negative |
| Q7YXD3 | MISLALLFMTGVESLKDGYI  | Negative |
| Q7YXD3 | LFMTGVESLKDGYIVNDINC  | Negative |
| Q7YXD3 | IVNDINCTYFCGRNAYCNEL  | Negative |
| Q7YXD3 | ESLKDGYIVNDINCTYFCGR  | Negative |
| Q7YZS9 | VLTSRCFPPGIYCTPYLPCC  | Negative |
| Q7YZS9 | CLNLFQVVLTSLRCFPPGIYC | Negative |
| Q7YZS9 | CFLLVIACLNLFQVVLTSLRC | Negative |
| Q7YZS9 | NLFQVVLTSLRCFPPGIYCTP | Negative |
| Q7YZS9 | IACLNLFQVVLTSLRCFPPGI | Negative |
| Q7YZS9 | MFRLTSVSCFLLVIACLNLF  | Negative |
| Q7YZS9 | RLTSVSCFLLVIACLNLFQV  | Negative |
| Q7YZS9 | SCFLLVIACLNLFQVVLTSLR | Negative |
| Q7YZS9 | CFPPGIYCTPYLPCCWGICC  | Negative |
| Q7YZS9 | FRLTSVSCFLLVIACLNLFQ  | Negative |
| Q7YZS9 | SVSCFLLVIACLNLFQVVLT  | Negative |
| Q7YZS9 | LNLFQVVLTSLRCFPPGIYCT | Negative |
| Q7YZS9 | VSCFLLVIACLNLFQVVLTSL | Negative |
| Q7YZS9 | LTSVSCFLLVIACLNLFQVV  | Negative |
| Q7YZS9 | FLLVIACLNLFQVVLTSLRCF | Negative |
| Q7YZS9 | FQVVLTSLRCFPPGIYCTPYL | Negative |
| Q7YZS9 | LFQVVLTSLRCFPPGIYCTPY | Negative |
| Q7YZS9 | VIACLNLFQVVLTSLRCFPPG | Negative |
| Q7YZS9 | ACLNLFQVVLTSLRCFPPGIY | Negative |
| Q7YZS9 | VVLTSLRCFPPGIYCTPYLPC | Negative |
| Q7YZS9 | SRCFPPGIYCTPYLPCCWGI  | Negative |
| Q7YZS9 | TSVSCFLLVIACLNLFQVV   | Negative |
| Q7YZS9 | QVVLTSLRCFPPGIYCTPYLP | Negative |

|        |                       |          |
|--------|-----------------------|----------|
| Q7YZS9 | RCFPPGIYCTPYLPCCWGIC  | Negative |
| Q7YZS9 | LTSRCFPPGIYCTPYLPCCW  | Negative |
| Q7YZS9 | TSRCFPPGIYCTPYLPCCWG  | Negative |
| Q7YZS9 | LVIACLNLQVVLTSRCFPP   | Negative |
| Q7YZS9 | FPPGIYCTPYLPCCWGICCG  | Negative |
| Q7YZS9 | MMFRLTSVSCFLLVIACLNL  | Negative |
| Q7Z0H4 | VLVILVLFSMLIWTAYGTPY  | Negative |
| Q7Z0H4 | GTPYPVNCKTDRDCVMCGLG  | Negative |
| Q7Z0H4 | NCKTDRDCVMCGLGISCKNG  | Negative |
| Q7Z0H4 | LFSMLIWTAYGTPYPVNCKT  | Negative |
| Q7Z0H4 | AVLVILVLFSMLIWTAYGTP  | Negative |
| Q7Z0H4 | YGTPYPVNCKTDRDCVMCGL  | Negative |
| Q7Z0H4 | LIWTAYGTPYPVNCKTDRDC  | Negative |
| Q7Z0H4 | MKIFFAVLVILVLFSMLIWT  | Negative |
| Q7Z0H4 | TAYGTPYPVNCKTDRDCVMC  | Negative |
| Q7Z0H4 | PVNCKTDRDCVMCGLGISCK  | Negative |
| Q7Z0H4 | CKTDRDCVMCGLGISCKNGY  | Negative |
| Q7Z0H4 | FFAVLVILVLFSMLIWTAYG  | Negative |
| Q7Z0H4 | YPVNCKTDRDCVMCGLGIS   | Negative |
| Q7Z0H4 | SMLIWTAYGTPYPVNCKTDR  | Negative |
| Q7Z0H4 | TPYPVNCKTDRDCVMCGLGI  | Negative |
| Q7Z0H4 | IWTAYGTPYPVNCKTDRDCV  | Negative |
| Q7Z0H4 | MLIWTAYGTPYPVNCKTDRD  | Negative |
| Q7Z0H4 | IFFAVLVILVLFSMLIWTAY  | Negative |
| Q7Z0H4 | KIFFAVLVILVLFSMLIWT   | Negative |
| Q7Z0H4 | FSMLIWTAYGTPYPVNCKTD  | Negative |
| Q7Z0H4 | PYPVNCKTDRDCVMCGLGIS  | Negative |
| Q7Z0H4 | ILVLFSMLIWTAYGTPYPVN  | Negative |
| Q7Z0H4 | WTAYGTPYPVNCKTDRDCVM  | Negative |
| Q7Z0H4 | FAVLVILVLFSMLIWTAYGT  | Negative |
| Q7Z0H4 | LVLFSLIWTAYGTPYPVNC   | Negative |
| Q7Z0H4 | VLFSMLIWTAYGTPYPVNCK  | Negative |
| Q7Z0H4 | AYGTPYPVNCKTDRDCVMCG  | Negative |
| Q7Z0H4 | VNCKTDRDCVMCGLGISCKN  | Negative |
| Q7Z0H4 | LVILVLFSMLIWTAYGTPYP  | Negative |
| Q7Z0T3 | VIPNGSSVPNPCNTSQAQ    | Negative |
| Q7Z0T3 | QKRTLRFVFLAVSLLCALANA | Negative |
| Q7Z0T3 | CALANAYPQYQAVIPNGSSV  | Negative |
| Q7Z0T3 | LCALANAYPQYQAVIPNGSS  | Negative |
| Q7Z0T3 | RTLRFVFLAVSLLCALANAYP | Negative |
| Q7Z0T3 | QAVIPNGSSVPNPCNTSQA   | Negative |
| Q7Z0T3 | MEQKRTLRFVFLAVSLLCALA | Negative |
| Q7Z0T3 | IPNGSSVPNPCNTSQAQGV   | Negative |
| Q7Z0T3 | FLAVSLLCALANAYPQYQAV  | Negative |
| Q7Z0T3 | EQKRTLRFVFLAVSLLCALAN | Negative |
| Q7Z0T3 | LRVFLAVSLLCALANAYPQY  | Negative |

|        |                       |          |
|--------|-----------------------|----------|
| Q7Z0T3 | ANAYPQYQAVIPNGSSVPNP  | Negative |
| Q7Z0T3 | YQAVIPNGSSVPNPCNTSQI  | Negative |
| Q7Z0T3 | NAYPQYQAVIPNGSSVPNPC  | Negative |
| Q7Z0T3 | LAVSLLCALANAYPQYQAVI  | Negative |
| Q7Z0T3 | SLLCALANAYPQYQAVIPNG  | Negative |
| Q7Z0T3 | QYQAVIPNGSSVPNPCNTSQ  | Negative |
| Q7Z0T3 | AVIPNGSSVPNPCNTSQIAQ  | Negative |
| Q7Z0T3 | ALANAYPQYQAVIPNGSSVP  | Negative |
| Q7Z0T3 | VSLLCALANAYPQYQAVIPN  | Negative |
| Q7Z0T3 | PQYQAVIPNGSSVPNPCNTS  | Negative |
| Q7Z0T3 | TLRVFLAVSLLCALANAYPQ  | Negative |
| Q7Z0T3 | AYPQYQAVIPNGSSVPNPCN  | Negative |
| Q7Z0T3 | YPQYQAVIPNGSSVPNPCNT  | Negative |
| Q7Z0T3 | VFLAVSLLCALANAYPQYQA  | Negative |
| Q7Z0T3 | LLCALANAYPQYQAVIPNGS  | Negative |
| Q7Z0T3 | LANAYPQYQAVIPNGSSVPN  | Negative |
| Q7Z0T3 | KRTLRFVFLAVSLLCALANAY | Negative |
| Q7Z0T3 | AVSLLCALANAYPQYQAVIP  | Negative |
| Q7Z1K3 | ASICLGADRTECQLPLDKG   | Negative |
| Q7Z1K3 | SICLGADRTECQLPLDKGT   | Negative |
| Q7Z1K3 | ICLGADRTECQLPLDKGTP   | Negative |
| Q7Z1K3 | AASICLGADRTECQLPLDK   | Negative |
| Q7Z1K3 | RTECQLPLDKGTPCTQEGGV  | Negative |
| Q7Z1K3 | AALLAASICLGADRTECQ    | Negative |
| Q7Z1K3 | SMQHFSLAALLAASICLG    | Negative |
| Q7Z1K3 | CQLPLDKGTPCTQEGGVKPS  | Negative |
| Q7Z1K3 | LLAASICLGADRTECQLPL   | Negative |
| Q7Z1K3 | DRTECQLPLDKGTPCTQEGG  | Negative |
| Q7Z1K3 | HFSLAALLAASICLGADR    | Negative |
| Q7Z1K3 | MQHFSLAALLAASICLGDA   | Negative |
| Q7Z1K3 | SLAALLAASICLGADRTE    | Negative |
| Q7Z1K3 | DADRTECQLPLDKGTPCTQE  | Negative |
| Q7Z1K3 | QLPLDKGTPCTQEGGVKPSV  | Negative |
| Q7Z1K3 | ECQLPLDKGTPCTQEGGVKP  | Negative |
| Q7Z1K3 | LAASICLGADRTECQLPLD   | Negative |
| Q7Z1K3 | LLAASICLGADRTECQLP    | Negative |
| Q7Z1K3 | CLGDADRTECQLPLDKGTPC  | Negative |
| Q7Z1K3 | FSLAALLAASICLGADR     | Negative |
| Q7Z1K3 | ASMQHFSLAALLAASICLG   | Negative |
| Q7Z1K3 | QHFSLAALLAASICLGDA    | Negative |
| Q7Z1K3 | TECQLPLDKGTPCTQEGGVK  | Negative |
| Q7Z1K3 | LGDADRTECQLPLDKGTPCT  | Negative |
| Q7Z1K3 | LPLDKGTPCTQEGGVKPSVA  | Negative |
| Q7Z1K3 | MASMQHFSLAALLAASICL   | Negative |
| Q7Z1K3 | ADRTECQLPLDKGTPCTQEG  | Negative |
| Q7Z1K3 | GDADRTECQLPLDKGTPCTQ  | Negative |



|        |                       |          |
|--------|-----------------------|----------|
| Q7Z1K3 | ALLLAASICLGADARTECQL  | Negative |
| Q7Z5L0 | ATGFTCAQTDGRNGYTAVIE  | Negative |
| Q7Z5L0 | LLLRATGFTCAQTDGRNGYT  | Negative |
| Q7Z5L0 | LRATGFTCAQTDGRNGYTAV  | Negative |
| Q7Z5L0 | AKLLPLLLLLLRATGFTCAQT | Negative |
| Q7Z5L0 | GAGAKLLPLLLLLLRATGFTC | Negative |
| Q7Z5L0 | GRNGYTAVIEVTSGGPWGDW  | Negative |
| Q7Z5L0 | AQTDGRNGYTAVIEVTSGGP  | Negative |
| Q7Z5L0 | GFTCAQTDGRNGYTAVIEVT  | Negative |
| Q7Z5L0 | NGYTAVIEVTSGGPWGDWAW  | Negative |
| Q7Z5L0 | PLLLLLLRATGFTCAQTDGRN | Negative |
| Q7Z5L0 | CAQTDGRNGYTAVIEVTSGG  | Negative |
| Q7Z5L0 | MERGAGAKLLPLLLLLLRATG | Negative |
| Q7Z5L0 | RATGFTCAQTDGRNGYTAVI  | Negative |
| Q7Z5L0 | TCAQTDGRNGYTAVIEVTSG  | Negative |
| Q7Z5L0 | KLLPLLLLLLRATGFTCAQTD | Negative |
| Q7Z5L0 | LLPLLLLLLRATGFTCAQTDG | Negative |
| Q7Z5L0 | RNGYTAVIEVTSGGPWGDWA  | Negative |
| Q7Z5L0 | LLLLLRATGFTCAQTDGRNGY | Negative |
| Q7Z5L0 | FTCAQTDGRNGYTAVIEVTS  | Negative |
| Q7Z5L0 | TGFTCAQTDGRNGYTAVIEV  | Negative |
| Q7Z5L0 | DGRNGYTAVIEVTSGGPWGD  | Negative |
| Q7Z5L0 | ERGAGAKLLPLLLLLLRATGF | Negative |
| Q7Z5L0 | RGAGAKLLPLLLLLLRATGFT | Negative |
| Q7Z5L0 | AGAKLLPLLLLLLRATGFTCA | Negative |
| Q7Z5L0 | TDGRNGYTAVIEVTSGGPWG  | Negative |
| Q7Z5L0 | GAKLLPLLLLLLRATGFTCAQ | Negative |
| Q7Z5L0 | LLLLLRATGFTCAQTDGRNG  | Negative |
| Q7Z5L0 | QTDGRNGYTAVIEVTSGGPW  | Negative |
| Q7Z5L0 | LLRATGFTCAQTDGRNGYTA  | Negative |
| Q7ZT98 | SLAAVLQQSFGNVDFNSEST  | Negative |
| Q7ZT98 | DFNSESTRRQKKQKEIVDLH  | Negative |
| Q7ZT98 | TRRQKKQKEIVDLHNSLRRS  | Negative |
| Q7ZT98 | FGNVDFNSESTRRQKKQKEI  | Negative |
| Q7ZT98 | QQSFGNVDFNSESTRRQKKQ  | Negative |
| Q7ZT98 | NSESTRRQKKQKEIVDLHNS  | Negative |
| Q7ZT98 | QSFGNVDFNSESTRRQKKQK  | Negative |
| Q7ZT98 | LLSLAAVLQQSFGNVDFNSE  | Negative |
| Q7ZT98 | ESTRRQKKQKEIVDLHNSLR  | Negative |
| Q7ZT98 | SESTRRQKKQKEIVDLHNSL  | Negative |
| Q7ZT98 | QKKQKEIVDLHNSLRRSVSP  | Negative |
| Q7ZT98 | AAVLQQSFGNVDFNSESTRR  | Negative |
| Q7ZT98 | MIAFTLLSLAAVLQQSFGNV  | Negative |
| Q7ZT98 | IAFTLLSLAAVLQQSFGNVD  | Negative |
| Q7ZT98 | AVLQQSFGNVDFNSESTRRQ  | Negative |
| Q7ZT98 | STRRQKKQKEIVDLHNSLRR  | Negative |

|        |                      |          |
|--------|----------------------|----------|
| Q7ZT98 | VLQQSFGNVDFNSESTRRQK | Negative |
| Q7ZT98 | VDFNSESTRRQKKQKEIVDL | Negative |
| Q7ZT98 | FNSESTRRQKKQKEIVDLHN | Negative |
| Q7ZT98 | LQQSFGNVDFNSESTRRQKK | Negative |
| Q7ZT98 | NVDFNSESTRRQKKQKEIVD | Negative |
| Q7ZT98 | AFTLLSLAAVLQQSFGNVDF | Negative |
| Q7ZT98 | LSLAAVLQQSFGNVDFNSES | Negative |
| Q7ZT98 | LAAVLQQSFGNVDFNSESTR | Negative |
| Q7ZT98 | RQKKQKEIVDLHNSLRRSVS | Negative |
| Q7ZT98 | GNVDFNSESTRRQKKQKEIV | Negative |
| Q7ZT98 | RRQKKQKEIVDLHNSLRRSV | Negative |
| Q7ZT98 | TLLSLAAVLQQSFGNVDFNS | Negative |
| Q7ZT98 | SFGNVDFNSESTRRQKKQKE | Negative |
| Q7ZTA6 | LIMKVAKRSGLLSYSAYGCY | Negative |
| Q7ZTA6 | IMKVAKRSGLLSYSAYGCYC | Negative |
| Q7ZTA6 | QFELLIMKVAKRSGLLSYSA | Negative |
| Q7ZTA6 | LLLGVEGNLVQFELLIMKVA | Negative |
| Q7ZTA6 | ILAVLLLGVEGNLVQFELLI | Negative |
| Q7ZTA6 | ELLIMKVAKRSGLLSYSAYG | Negative |
| Q7ZTA6 | LWILAVLLLGVEGNLVQFEL | Negative |
| Q7ZTA6 | MKVAKRSGLLSYSAYGCYCG | Negative |
| Q7ZTA6 | NLVQFELLIMKVAKRSGLLS | Negative |
| Q7ZTA6 | VAKRSGLLSYSAYGCYCGWG | Negative |
| Q7ZTA6 | GVEGNLVQFELLIMKVAKRS | Negative |
| Q7ZTA6 | AVLLLGVEGNLVQFELLIMK | Negative |
| Q7ZTA6 | TLWILAVLLLGVEGNLVQFE | Negative |
| Q7ZTA6 | EGNLVQFELLIMKVAKRSGL | Negative |
| Q7ZTA6 | KVAKRSGLLSYSAYGCYCGW | Negative |
| Q7ZTA6 | WILAVLLLGVEGNLVQFELL | Negative |
| Q7ZTA6 | KRSGLLSYSAYGCYCGWGGY | Negative |
| Q7ZTA6 | AKRSGLLSYSAYGCYCGWGG | Negative |
| Q7ZTA6 | LAVLLLGVEGNLVQFELLIM | Negative |
| Q7ZTA6 | LVQFELLIMKVAKRSGLLSY | Negative |
| Q7ZTA6 | LLIMKVAKRSGLLSYSAYGC | Negative |
| Q7ZTA6 | VQFELLIMKVAKRSGLLSYS | Negative |
| Q7ZTA6 | LGVEGNLVQFELLIMKVAKR | Negative |
| Q7ZTA6 | MRTLWILAVLLLGVEGNLVQ | Negative |
| Q7ZTA6 | VLLLGVEGNLVQFELLIMKV | Negative |
| Q7ZTA6 | VEGNLVQFELLIMKVAKRSG | Negative |
| Q7ZTA6 | FELLIMKVAKRSGLLSYSAY | Negative |
| Q7ZTA6 | GNLVQFELLIMKVAKRSGLL | Negative |
| Q7ZTA6 | LLGVEGNLVQFELLIMKVAK | Negative |
| Q7ZZN8 | LLSLAAVLQQSSGTVDFASE | Negative |
| Q7ZZN8 | SESSNKRENQKQIVDKHNAL | Negative |
| Q7ZZN8 | IAFIVLLSLAAVLQQSSGTV | Negative |
| Q7ZZN8 | AVLQQSSGTVDFASESSNKR | Negative |

|        |                      |          |
|--------|----------------------|----------|
| Q7ZZN8 | LSLAAVLQQSSGTVDFASES | Negative |
| Q7ZZN8 | KRENQKQIVDKHNALRRSVR | Negative |
| Q7ZZN8 | QQSSGTVDFASESSNKRENQ | Negative |
| Q7ZZN8 | LQQSSGTVDFASESSNKREN | Negative |
| Q7ZZN8 | SSNKRENQKQIVDKHNALRR | Negative |
| Q7ZZN8 | VDFASESSNKRENQKQIVDK | Negative |
| Q7ZZN8 | GTVDFASESSNKRENQKQIV | Negative |
| Q7ZZN8 | SSGTVDFASESSNKRENQKQ | Negative |
| Q7ZZN8 | SNKRENQKQIVDKHNALRRS | Negative |
| Q7ZZN8 | TVDFASESSNKRENQKQIVD | Negative |
| Q7ZZN8 | QSSGTVDFASESSNKRENQK | Negative |
| Q7ZZN8 | MIAFIVLLSLAAVLQQSSGT | Negative |
| Q7ZZN8 | VLLSLAAVLQQSSGTVDFA  | Negative |
| Q7ZZN8 | SGTVDFASESSNKRENQKQI | Negative |
| Q7ZZN8 | NKRENQKQIVDKHNALRRSV | Negative |
| Q7ZZN8 | ESSNKRENQKQIVDKHNALR | Negative |
| Q7ZZN8 | VLQQSSGTVDFASESSNKRE | Negative |
| Q7ZZN8 | AAVLQQSSGTVDFASESSNK | Negative |
| Q7ZZN8 | FIVLLSLAAVLQQSSGTVDF | Negative |
| Q7ZZN8 | ASESSNKRENQKQIVDKHNA | Negative |
| Q7ZZN8 | FASESSNKRENQKQIVDKHN | Negative |
| Q7ZZN8 | SLAAVLQQSSGTVDFASESS | Negative |
| Q7ZZN8 | AFIVLLSLAAVLQQSSGTVD | Negative |
| Q7ZZN8 | LAAVLQQSSGTVDFASESSN | Negative |
| Q7ZZN8 | DFASESSNKRENQKQIVDKH | Negative |
| Q800A0 | IIRVPLKRQKSMRKILKEKG | Negative |
| Q800A0 | IRVPLKRQKSMRKILKEKGK | Negative |
| Q800A0 | LILSFVHGIIRVPLKRQKSM | Negative |
| Q800A0 | QFLVVLLILSFVHGIIRVPL | Negative |
| Q800A0 | FLVVLLILSFVHGIIRVPLK | Negative |
| Q800A0 | MKQFLVVLLILSFVHGIIRV | Negative |
| Q800A0 | RQKSMRKILKEKGKLSHLWT | Negative |
| Q800A0 | MRKILKEKGKLSHLWTKQGN | Negative |
| Q800A0 | KRQKSMRKILKEKGKLSHLW | Negative |
| Q800A0 | GIIRVPLKRQKSMRKILKEK | Negative |
| Q800A0 | KSMRKILKEKGKLSHLWTKQ | Negative |
| Q800A0 | RVPLKRQKSMRKILKEKGKL | Negative |
| Q800A0 | SMRKILKEKGKLSHLWTKQG | Negative |
| Q800A0 | VLLILSFVHGIIRVPLKRQK | Negative |
| Q800A0 | FVHGIIRVPLKRQKSMRKIL | Negative |
| Q800A0 | ILSFVHGIIRVPLKRQKSMR | Negative |
| Q800A0 | PLKRQKSMRKILKEKGKLSH | Negative |
| Q800A0 | LVVLLILSFVHGIIRVPLKR | Negative |
| Q800A0 | VPLKRQKSMRKILKEKGKLS | Negative |
| Q800A0 | HGIIRVPLKRQKSMRKILKE | Negative |
| Q800A0 | VHGIIRVPLKRQKSMRKILK | Negative |

|        |                      |          |
|--------|----------------------|----------|
| Q800A0 | RKILKEKGKLSHLWTKQGNE | Negative |
| Q800A0 | LKRQKSMRKILKEKGKLSHL | Negative |
| Q800A0 | VVLLILSFVHGIIRVPLKRQ | Negative |
| Q800A0 | QKSMRKILKEKGKLSHLWTK | Negative |
| Q800A0 | LSFVHGIIRVPLKRQKSMRK | Negative |
| Q800A0 | LLILSFVHGIIRVPLKRQKS | Negative |
| Q800A0 | KILKEKGKLSHLWTKQGNEF | Negative |
| Q800A0 | SFVHGIIRVPLKRQKSMRKI | Negative |
| Q800Y2 | IALCVCYESHESSESAEDLF | Negative |
| Q800Y2 | LSAAIALCVCYESHESSESA | Negative |
| Q800Y2 | SLLQFLALSAAIALCVCYES | Negative |
| Q800Y2 | AAIALCVCYESHESSESAED | Negative |
| Q800Y2 | LALSAAIALCVCYESHESSE | Negative |
| Q800Y2 | HESSESAEDLFVPPQQANSF | Negative |
| Q800Y2 | EDLFVPPQQANSFMTQQRGN | Negative |
| Q800Y2 | QFLALSAAIALCVCYESHES | Negative |
| Q800Y2 | VCYESHESSESAEDLFVPPQ | Negative |
| Q800Y2 | CYESHESSESAEDLFVPPQQ | Negative |
| Q800Y2 | SHESSESAEDLFVPPQQANS | Negative |
| Q800Y2 | FLALSAAIALCVCYESHES  | Negative |
| Q800Y2 | YESHESSESAEDLFVPPQQA | Negative |
| Q800Y2 | AIALCVCYESHESSESAEDL | Negative |
| Q800Y2 | SAEDLFVPPQQANSFMTQQR | Negative |
| Q800Y2 | SESAEDLFVPPQQANSFMT  | Negative |
| Q800Y2 | CVCYESHESSESAEDLFVPP | Negative |
| Q800Y2 | SSESAEDLFVPPQQANSFMT | Negative |
| Q800Y2 | ESSESAEDLFVPPQQANSFM | Negative |
| Q800Y2 | ALCVCYESHESSESAEDLFV | Negative |
| Q800Y2 | ESHESSESAEDLFVPPQQAN | Negative |
| Q800Y2 | AEDLFVPPQQANSFMTQQRG | Negative |
| Q800Y2 | ALSAAIALCVCYESHESSES | Negative |
| Q800Y2 | LCVCYESHESSESAEDLFVP | Negative |
| Q800Y2 | LLQFLALSAAIALCVCYESH | Negative |
| Q800Y2 | MRSLLQFLALSAAIALCVCY | Negative |
| Q800Y2 | SAAIALCVCYESHESSESAE | Negative |
| Q800Y2 | RSLLQFLALSAAIALCVCYE | Negative |
| Q800Y2 | ESAEDLFVPPQQANSFMTQ  | Negative |
| Q805A2 | IKIMTKKNGFPFYTSYGCYC | Negative |
| Q805A2 | LLQFNKMIKIMTKKNGFPFY | Negative |
| Q805A2 | AVLLVGVEGNLLQFNKMIKI | Negative |
| Q805A2 | LQFNKMIKIMTKKNGFPFYT | Negative |
| Q805A2 | TKKNGFPFYTSYGCYCGWGG | Negative |
| Q805A2 | VGVEGNLLQFNKMIKIMTKK | Negative |
| Q805A2 | MIKIMTKKNGFPFYTSYGCY | Negative |
| Q805A2 | LVGVEGNLLQFNKMIKIMTK | Negative |
| Q805A2 | IMTKKNGFPFYTSYGCYCGW | Negative |

|        |                      |          |
|--------|----------------------|----------|
| Q805A2 | GNLLQFNKMIKIMTKKNGFP | Negative |
| Q805A2 | FNKMIKIMTKKNGFPFYTSY | Negative |
| Q805A2 | IMAVLLVGVEGNLLQFNKMI | Negative |
| Q805A2 | EGNLLQFNKMIKIMTKKNGF | Negative |
| Q805A2 | MTKKNGFPFYTSYGCYCGWG | Negative |
| Q805A2 | KMIKIMTKKNGFPFYTSYGC | Negative |
| Q805A2 | GVEGNLLQFNKMIKIMTKKN | Negative |
| Q805A2 | WIMAVLLVGVEGNLLQFNKM | Negative |
| Q805A2 | TLWIMAVLLVGVEGNLLQFN | Negative |
| Q805A2 | KKNGFPFYTSYGCYCGWGGR | Negative |
| Q805A2 | NLLQFNKMIKIMTKKNGFPF | Negative |
| Q805A2 | MRTLWIMAVLLVGVEGNLLQ | Negative |
| Q805A2 | KIMTKKNGFPFYTSYGCYCG | Negative |
| Q805A2 | LWIMAVLLVGVEGNLLQFNK | Negative |
| Q805A2 | LLVGVEGNLLQFNKMIKIMT | Negative |
| Q805A2 | NKMIKIMTKKNGFPFYTSYG | Negative |
| Q805A2 | QFNKMIKIMTKKNGFPFYTS | Negative |
| Q805A2 | MAVLLVGVEGNLLQFNKMIK | Negative |
| Q805A2 | VEGNLLQFNKMIKIMTKKNG | Negative |
| Q805A2 | VLLVGVEGNLLQFNKMIKIM | Negative |
| Q805F3 | VYGLIRVPLKRQKSIRKTLK | Negative |
| Q805F3 | KSIRKTLKEKGKLSHIWTQQ | Negative |
| Q805F3 | LLFATLVYGLIRVPLKRQKS | Negative |
| Q805F3 | SIRKTLKEKGKLSHIWTQQG | Negative |
| Q805F3 | LKRQKSIRKTLKEKGKLSHI | Negative |
| Q805F3 | YGLIRVPLKRQKSIRKTLKE | Negative |
| Q805F3 | IRKTLKEKGKLSHIWTQQGI | Negative |
| Q805F3 | LIRVPLKRQKSIRKTLKEKG | Negative |
| Q805F3 | IRVPLKRQKSIRKTLKEKGK | Negative |
| Q805F3 | FATLVYGLIRVPLKRQKSIR | Negative |
| Q805F3 | QILVLLLFATLVYGLIRVPL | Negative |
| Q805F3 | RKTLKEKGKLSHIWTQQGID | Negative |
| Q805F3 | QKSIRKTLKEKGKLSHIWTQ | Negative |
| Q805F3 | LLFATLVYGLIRVPLKRQK  | Negative |
| Q805F3 | PLKRQKSIRKTLKEKGKLSH | Negative |
| Q805F3 | LVLLLFATLVYGLIRVPLKR | Negative |
| Q805F3 | VLLLFATLVYGLIRVPLKRQ | Negative |
| Q805F3 | KTLKEKGKLSHIWTQQGIDM | Negative |
| Q805F3 | RQKSIRKTLKEKGKLSHIWT | Negative |
| Q805F3 | ATLVYGLIRVPLKRQKSIRK | Negative |
| Q805F3 | LFATLVYGLIRVPLKRQKSI | Negative |
| Q805F3 | TLVYGLIRVPLKRQKSIRKT | Negative |
| Q805F3 | LVYGLIRVPLKRQKSIRKTL | Negative |
| Q805F3 | ILVLLLFATLVYGLIRVPLK | Negative |
| Q805F3 | GLIRVPLKRQKSIRKTLKEK | Negative |
| Q805F3 | MRQILVLLLFATLVYGLIRV | Negative |

|        |                      |          |
|--------|----------------------|----------|
| Q805F3 | VPLKRQKSIRKTLKEKGKLS | Negative |
| Q805F3 | KRQKSIRKTLKEKGKLSHIW | Negative |
| Q805F3 | RVPLKRQKSIRKTLKEKGKL | Negative |
| Q82S91 | HTAHVDEAVKHAEAAVAHGK | Negative |
| Q82S91 | LSMQVYASGHTAHVDEAVKH | Negative |
| Q82S91 | LIKVIAASVTALFLSMQVYA | Negative |
| Q82S91 | ASGHTAHVDEAVKHAEAAVA | Negative |
| Q82S91 | VIAASVTALFLSMQVYASGH | Negative |
| Q82S91 | QVYASGHTAHVDEAVKHAE  | Negative |
| Q82S91 | HVDEAVKHAEAAVAHGKEGH | Negative |
| Q82S91 | YASGHTAHVDEAVKHAEAAV | Negative |
| Q82S91 | TLIKVIAASVTALFLSMQVY | Negative |
| Q82S91 | SMQVYASGHTAHVDEAVKHA | Negative |
| Q82S91 | ALFLSMQVYASGHTAHVDEA | Negative |
| Q82S91 | ASVTALFLSMQVYASGHTAH | Negative |
| Q82S91 | FLSMQVYASGHTAHVDEAVK | Negative |
| Q82S91 | KVIAASVTALFLSMQVYASG | Negative |
| Q82S91 | IKVIAASVTALFLSMQVYAS | Negative |
| Q82S91 | TALFLSMQVYASGHTAHVDE | Negative |
| Q82S91 | IAASVTALFLSMQVYASGHT | Negative |
| Q82S91 | VTALFLSMQVYASGHTAHVD | Negative |
| Q82S91 | SVTALFLSMQVYASGHTAHV | Negative |
| Q82S91 | VYASGHTAHVDEAVKHAEAA | Negative |
| Q82S91 | MQVYASGHTAHVDEAVKHAE | Negative |
| Q82S91 | AHVDEAVKHAEAAVAHGKEG | Negative |
| Q82S91 | SGHTAHVDEAVKHAEAAVAH | Negative |
| Q82S91 | TAHVDEAVKHAEAAVAHGKE | Negative |
| Q82S91 | LFLSMQVYASGHTAHVDEAV | Negative |
| Q82S91 | TTLIKVIAASVTALFLSMQV | Negative |
| Q82S91 | KTTLIKVIAASVTALFLSMQ | Negative |
| Q82S91 | MKTTLIKVIAASVTALFLSM | Negative |
| Q82S91 | GHTAHVDEAVKHAEAAVAHG | Negative |
| Q83EK8 | SALCCLASAAFAGGPDIPMI | Negative |
| Q83EK8 | LASAAFAGGPDIPMIDMNGF | Negative |
| Q83EK8 | AGGPDIPMIDMNGFHIGLGF | Negative |
| Q83EK8 | TTTKLAIGVSALCCLASAAF | Negative |
| Q83EK8 | PMIDMNGFHIGLGFYKSYT  | Negative |
| Q83EK8 | CCLASAAFAGGPDIPMIDMN | Negative |
| Q83EK8 | MIDMNGFHIGLGFYKSYTY  | Negative |
| Q83EK8 | GGPDIPMIDMNGFHIGLGF  | Negative |
| Q83EK8 | ALCCLASAAFAGGPDIPMID | Negative |
| Q83EK8 | AAFAGGPDIPMIDMNGFHIG | Negative |
| Q83EK8 | AIGVSALCCLASAAFAGGPD | Negative |
| Q83EK8 | ETTTKLAIGVSALCCLASAA | Negative |
| Q83EK8 | IPMIDMNGFHIGLGFYKSY  | Negative |
| Q83EK8 | LAIGVSALCCLASAAFAGGP | Negative |

|        |                      |          |
|--------|----------------------|----------|
| Q83EK8 | FAGGPDIPMIDMNGFHIGLG | Negative |
| Q83EK8 | DIPMIDMNGFHIGLGFGYKS | Negative |
| Q83EK8 | CLASAAFAGGPDIPMIDMNG | Negative |
| Q83EK8 | AFAGGPDIPMIDMNGFHIGL | Negative |
| Q83EK8 | VSALCCLASAAFAGGPDIPM | Negative |
| Q83EK8 | ASAAFAGGPDIPMIDMNGFH | Negative |
| Q83EK8 | TKLAIGVSALCCLASAAFAG | Negative |
| Q83EK8 | LCCLASAAFAGGPDIPMIDM | Negative |
| Q83EK8 | METTTKLAIGVSALCCLASA | Negative |
| Q83EK8 | TTKLAIGVSALCCLASAAFA | Negative |
| Q83EK8 | GPDIPMIDMNGFHIGLGFGY | Negative |
| Q83EK8 | GVSALCCLASAAFAGGPDIP | Negative |
| Q83EK8 | SAAFAGGPDIPMIDMNGFHI | Negative |
| Q83EK8 | PDIPMIDMNGFHIGLGFGYK | Negative |
| Q83EK8 | KLAIGVSALCCLASAAFAGG | Negative |
| Q84UV8 | VDDESEFSYDEKSENGPANW | Negative |
| Q84UV8 | ITKMLFISFLFLSSVFLARS | Negative |
| Q84UV8 | AITKMLFISFLFLSSVFLAR | Negative |
| Q84UV8 | LFLSSVFLARSGEVDDESEF | Negative |
| Q84UV8 | SFLFLSSVFLARSGEVDDES | Negative |
| Q84UV8 | DDESEFSYDEKSENGPANWG | Negative |
| Q84UV8 | SGEVDDESEFSYDEKSENGP | Negative |
| Q84UV8 | MLFISFLFLSSVFLARSGEV | Negative |
| Q84UV8 | DESEFSYDEKSENGPANWGN | Negative |
| Q84UV8 | VFLARSGEVDDESEFSYDEK | Negative |
| Q84UV8 | FLARSGEVDDESEFSYDEKS | Negative |
| Q84UV8 | EVDDESEFSYDEKSENGPAN | Negative |
| Q84UV8 | RMAAITKMLFISFLFLSSVF | Negative |
| Q84UV8 | RSGEVDDESEFSYDEKSENG | Negative |
| Q84UV8 | LFISFLFLSSVFLARSGEVD | Negative |
| Q84UV8 | TKMLFISFLFLSSVFLARSG | Negative |
| Q84UV8 | LARSGEVDDESEFSYDEKSE | Negative |
| Q84UV8 | AAITKMLFISFLFLSSVFLA | Negative |
| Q84UV8 | SSVFLARSGEVDDESEFSYD | Negative |
| Q84UV8 | ARSGEVDDESEFSYDEKSEN | Negative |
| Q84UV8 | FLSSVFLARSGEVDDESEFS | Negative |
| Q84UV8 | KMLFISFLFLSSVFLARSGE | Negative |
| Q84UV8 | MRMAAITKMLFISFLFLSSV | Negative |
| Q84UV8 | GEVDDESEFSYDEKSENGPA | Negative |
| Q84UV8 | SVFLARSGEVDDESEFSYDE | Negative |
| Q84UV8 | ISFLFLSSVFLARSGEVDDE | Negative |
| Q84UV8 | MAAITKMLFISFLFLSSVFL | Negative |
| Q84UV8 | FLFLSSVFLARSGEVDDESE | Negative |
| Q84UV8 | LSSVFLARSGEVDDESEFSY | Negative |
| Q84V39 | TSSSPVPKPPTQGNKKWCVP | Negative |
| Q84V39 | AGVPDQPVPTPTPSVPTSSS | Negative |

|        |                      |          |
|--------|----------------------|----------|
| Q84V39 | PVPKPPTQGNKKWCVPKAEA | Negative |
| Q84V39 | DQPVPTPTPSVPTSSSPVPK | Negative |
| Q84V39 | SSPVPKPPTQGNKKWCVPKA | Negative |
| Q84V39 | VPKPPTQGNKKWCVPKAEAT | Negative |
| Q84V39 | PKPPTQGNKKWCVPKAEATD | Negative |
| Q84V39 | TPSVPTSSSPVPKPPTQGNK | Negative |
| Q84V39 | MRGTAGVPDQPVPTPTPSVP | Negative |
| Q84V39 | GTAGVPDQPVPTPTPSVPTS | Negative |
| Q84V39 | PTPTPSVPTSSSPVPKPPTQ | Negative |
| Q84V39 | PVPTPTPSVPTSSSPVPKPP | Negative |
| Q84V39 | KPPTQGNKKWCVPKAEATDA | Negative |
| Q84V39 | SPVPKPPTQGNKKWCVPKAE | Negative |
| Q84V39 | GVPDQPVPTPTPSVPTSSSP | Negative |
| Q84V39 | PTPSVPTSSSPVPKPPTQGN | Negative |
| Q84V39 | PDQPVPTPTPSVPTSSSPVP | Negative |
| Q84V39 | QPVPTPTPSVPTSSSPVPKP | Negative |
| Q84V39 | TPTPSVPTSSSPVPKPPTQG | Negative |
| Q84V39 | PTQGNKKWCVPKAEATDAQL | Negative |
| Q84V39 | SVPTSSSPVPKPPTQGNKKW | Negative |
| Q84V39 | TAGVPDQPVPTPTPSVPTSS | Negative |
| Q84V39 | VPTPTPSVPTSSSPVPKPPT | Negative |
| Q84V39 | PPTQGNKKWCVPKAEATDAQ | Negative |
| Q84V39 | RGTAGVPDQPVPTPTPSVPT | Negative |
| Q84V39 | SSSPVPKPPTQGNKKWCVPK | Negative |
| Q84V39 | PSVPTSSSPVPKPPTQGNKK | Negative |
| Q84V39 | VPTSSSPVPKPPTQGNKKWC | Negative |
| Q84V39 | PTSSSPVPKPPTQGNKKWCV | Negative |
| Q84ZX5 | LLIFIVAIGEMEAAGSKLCE | Negative |
| Q84ZX5 | MEAAGSKLCEKTSKTYSGKC | Negative |
| Q84ZX5 | IGEMEAAGSKLCEKTSKTY  | Negative |
| Q84ZX5 | GEMEAAGSKLCEKTSKTYSG | Negative |
| Q84ZX5 | CEKTSKTYSGKCDNKKCDKK | Negative |
| Q84ZX5 | EMEAAGSKLCEKTSKTYSGK | Negative |
| Q84ZX5 | AAGSKLCEKTSKTYSGKCDN | Negative |
| Q84ZX5 | AIGEMEAAGSKLCEKTSKTY | Negative |
| Q84ZX5 | FCAVLLIFIVAIGEMEAAGS | Negative |
| Q84ZX5 | VFCVLLIFIVAIGEMEAAG  | Negative |
| Q84ZX5 | IVAIGEMEAAGSKLCEKTSK | Negative |
| Q84ZX5 | CSYVFCVLLIFIVAIGEME  | Negative |
| Q84ZX5 | AKCSYVFCVLLIFIVAIGE  | Negative |
| Q84ZX5 | AGSKLCEKTSKTYSGKCDNK | Negative |
| Q84ZX5 | KLCEKTSKTYSGKCDNKKCD | Negative |
| Q84ZX5 | MAKCSYVFCVLLIFIVAIG  | Negative |
| Q84ZX5 | IFIVAIGEMEAAGSKLCEKT | Negative |
| Q84ZX5 | EAAGSKLCEKTSKTYSGKCD | Negative |
| Q84ZX5 | CAVLLIFIVAIGEMEAAGSK | Negative |



|        |                      |          |
|--------|----------------------|----------|
| Q84ZX5 | GSKLCEKTSKTYSGKCDNKK | Negative |
| Q84ZX5 | YVFCAVLLIFIVAIGEMEEA | Negative |
| Q84ZX5 | VLLIFIVAIGEMEAAGSKLC | Negative |
| Q84ZX5 | KCSYVFCAVLLIFIVAIGEM | Negative |
| Q84ZX5 | SYVFCAVLLIFIVAIGEMEA | Negative |
| Q84ZX5 | VAIGEMEAAGSKLCEKTSKT | Negative |
| Q84ZX5 | SKLCEKTSKTYSGKCDNKKC | Negative |
| Q84ZX5 | LCEKTSKTYSGKCDNKKCDK | Negative |
| Q84ZX5 | FIVAIGEMEAAGSKLCEKTS | Negative |
| Q84ZX5 | LIFIVAIGEMEAAGSKLCEK | Negative |
| Q867F4 | SIILLTLLICSMSIFGNCQI | Negative |
| Q867F4 | KFSSIILLTLLICSMSIFGN | Negative |
| Q867F4 | IETNKKCQGGSCASVCRRVI | Negative |
| Q867F4 | ILLTLLICSMSIFGNCQIET | Negative |
| Q867F4 | FGNCQIETNKKCQGGSCASV | Negative |
| Q867F4 | QIETNKKCQGGSCASVCRRV | Negative |
| Q867F4 | CSMSIFGNCQIETNKKCQGG | Negative |
| Q867F4 | NCQIETNKKCQGGSCASVCR | Negative |
| Q867F4 | IFGNCQIETNKKCQGGSCAS | Negative |
| Q867F4 | SIFGNCQIETNKKCQGGSCA | Negative |
| Q867F4 | IILLTLLICSMSIFGNCQIE | Negative |
| Q867F4 | TLLICSMSIFGNCQIETNKK | Negative |
| Q867F4 | LTLICSMSIFGNCQIETNK  | Negative |
| Q867F4 | CQGGSCASVCRRVIGVAAGK | Negative |
| Q867F4 | LLICSMSIFGNCQIETNKKC | Negative |
| Q867F4 | SSIILLTLLICSMSIFGNCQ | Negative |
| Q867F4 | KCQGGSCASVCRRVIGVAAG | Negative |
| Q867F4 | SMSIFGNCQIETNKKCQGG  | Negative |
| Q867F4 | CQIETNKKCQGGSCASVCRR | Negative |
| Q867F4 | FSSIILLTLLICSMSIFGNC | Negative |
| Q867F4 | MSIFGNCQIETNKKCQGGSC | Negative |
| Q867F4 | GNCQIETNKKCQGGSCASVC | Negative |
| Q867F4 | NKKCQGGSCASVCRRVIGVA | Negative |
| Q867F4 | MKFSSIILLTLLICSMSIFG | Negative |
| Q867F4 | LICSMSIFGNCQIETNKKCQ | Negative |
| Q867F4 | ICSMSIFGNCQIETNKKCQG | Negative |
| Q867F4 | TNKKCQGGSCASVCRRVIGV | Negative |
| Q867F4 | ETNKKCQGGSCASVCRRVIG | Negative |
| Q867F4 | KKCQGGSCASVCRRVIGVAA | Negative |
| Q867W1 | LAVLSDPVSAGYRKPPFNGS | Negative |
| Q867W1 | YRKPPFNGSIFGKRAGGDSL | Negative |
| Q867W1 | VAVAVVLVVLAVLSDPVSAG | Negative |
| Q867W1 | QTRMLVAVAVVLVVLAVLSD | Negative |
| Q867W1 | VVLAVLSDPVSAGYRKPPFN | Negative |
| Q867W1 | PVSAGYRKPPFNGSIFGKRA | Negative |
| Q867W1 | TRMLVAVAVVLVVLAVLSDP | Negative |

|        |                      |          |
|--------|----------------------|----------|
| Q867W1 | LVVLAVLSDPVSAGYRKPPF | Negative |
| Q867W1 | AVVLVVLAVLSDPVSAGYRK | Negative |
| Q867W1 | LSDPVSAGYRKPPFNGSIFG | Negative |
| Q867W1 | SDPVSAGYRKPPFNGSIFGK | Negative |
| Q867W1 | VLVVLAVLSDPVSAGYRKPP | Negative |
| Q867W1 | VLSDPVSAGYRKPPFNGSIF | Negative |
| Q867W1 | AVLSDPVSAGYRKPPFNGSI | Negative |
| Q867W1 | LVAVAVVLVVLAVLSDPVS  | Negative |
| Q867W1 | MLVAVAVVLVVLAVLSDPVS | Negative |
| Q867W1 | AVAVVLVVLAVLSDPVSAGY | Negative |
| Q867W1 | GYRKPPFNGSIFGKRAGGDS | Negative |
| Q867W1 | SAGYRKPPFNGSIFGKRAGG | Negative |
| Q867W1 | VLAVLSDPVSAGYRKPPFNG | Negative |
| Q867W1 | RKPPFNGSIFGKRAGGDSLY | Negative |
| Q867W1 | VSAGYRKPPFNGSIFGKRAG | Negative |
| Q867W1 | DPVSAGYRKPPFNGSIFGKR | Negative |
| Q867W1 | VQTRMLVAVAVVLVVLAVLS | Negative |
| Q867W1 | AGYRKPPFNGSIFGKRAGGD | Negative |
| Q867W1 | CVQTRMLVAVAVVLVVLAVL | Negative |
| Q867W1 | RMLVAVAVVLVVLAVLSDPV | Negative |
| Q867W1 | VAVVLVVLAVLSDPVSAGYR | Negative |
| Q867W1 | MCVQTRMLVAVAVVLVVLAV | Negative |
| Q868Z9 | PGLRQKRQYGANMYLPESV  | Negative |
| Q868Z9 | CSTALVAFIVLASIHDSQSR | Negative |
| Q868Z9 | RRLCSTALVAFIVLASIHDS | Negative |
| Q868Z9 | SQSRFPGLRQKRQYGANMYL | Negative |
| Q868Z9 | IVLASIHDSQSRFPGLRQKR | Negative |
| Q868Z9 | DLSRRLCSTALVAFIVLASI | Negative |
| Q868Z9 | ALVAFIVLASIHDSQSRFPG | Negative |
| Q868Z9 | SRRLCSTALVAFIVLASIHD | Negative |
| Q868Z9 | RLCSTALVAFIVLASIHDSQ | Negative |
| Q868Z9 | SRFPGLRQKRQYGANMYLPE | Negative |
| Q868Z9 | VAFIVLASIHDSQSRFPGLR | Negative |
| Q868Z9 | HDSQSRFPGLRQKRQYGANM | Negative |
| Q868Z9 | LASIHDSQSRFPGLRQKRQY | Negative |
| Q868Z9 | AFIVLASIHDSQSRFPGLRQ | Negative |
| Q868Z9 | GLRQKRQYGANMYLPESST  | Negative |
| Q868Z9 | SIHDSQSRFPGLRQKRQYGA | Negative |
| Q868Z9 | STALVAFIVLASIHDSQSRF | Negative |
| Q868Z9 | IHDSQSRFPGLRQKRQYGAN | Negative |
| Q868Z9 | MDLSRRLCSTALVAFIVLAS | Negative |
| Q868Z9 | LSRRLCSTALVAFIVLASIH | Negative |
| Q868Z9 | RFPGLRQKRQYGANMYLPES | Negative |
| Q868Z9 | ASIHDSQSRFPGLRQKRQYG | Negative |
| Q868Z9 | FIVLASIHDSQSRFPGLRQK | Negative |
| Q868Z9 | TALVAFIVLASIHDSQSRFP | Negative |

|        |                        |          |
|--------|------------------------|----------|
| Q868Z9 | QSRFPGLRQKRQYGANMYLP   | Negative |
| Q868Z9 | FPGLRQKRQYGANMYLPSS    | Negative |
| Q868Z9 | LCSTALVAFIVLASIHDSQS   | Negative |
| Q868Z9 | DSQSRFPGLRQKRQYGANMY   | Negative |
| Q868Z9 | VLASIHDSQSRFPGLRQKRQ   | Negative |
| Q86IV5 | LALFLVN SAVVSSLDSCSIC  | Negative |
| Q86IV5 | ALFLVN SAVVSSLDSCSICV  | Negative |
| Q86IV5 | SLILALFLVN SAVVSSLDSC  | Negative |
| Q86IV5 | KLFLSLILALFLVN SAVVSSL | Negative |
| Q86IV5 | FLVN SAVVSSLDSCSICVDF  | Negative |
| Q86IV5 | SAVVSSLDSCSICVDFVGNS   | Negative |
| Q86IV5 | SICVDFVGNSLNDLLNIILN   | Negative |
| Q86IV5 | SCSICVDFVGNSLNDLLNII   | Negative |
| Q86IV5 | CSICVDFVGNSLNDLLNIIL   | Negative |
| Q86IV5 | SLDSCSICVDFVGNSLNDLL   | Negative |
| Q86IV5 | SSLDSCSICVDFVGNSLNDL   | Negative |
| Q86IV5 | ILALFLVN SAVVSSLDSCSI  | Negative |
| Q86IV5 | NKLFLSLILALFLVN SAVVSS | Negative |
| Q86IV5 | MNKLFLSLILALFLVN SAVVS | Negative |
| Q86IV5 | FSLILALFLVN SAVVSSLDS  | Negative |
| Q86IV5 | VN SAVVSSLDSCSICVDFVG  | Negative |
| Q86IV5 | DSCSICVDFVGNSLNDLLNI   | Negative |
| Q86IV5 | ICVDFVGNSLNDLLNIILNS   | Negative |
| Q86IV5 | CVDFVGNSLNDLLNIILNSG   | Negative |
| Q86IV5 | LFLVN SAVVSSLDSCSICVD  | Negative |
| Q86IV5 | VDFVGNSLNDLLNIILNSGV   | Negative |
| Q86IV5 | LVN SAVVSSLDSCSICVDFV  | Negative |
| Q86IV5 | DFVGNSLNDLLNIILNSGVI   | Negative |
| Q86IV5 | AVVSSLDSCSICVDFVGNSL   | Negative |
| Q86IV5 | LDSCSICVDFVGNSLNDLLN   | Negative |
| Q86IV5 | VVSSLDSCSICVDFVGNSLN   | Negative |
| Q86IV5 | NSAVVSSLDSCSICVDFVGN   | Negative |
| Q86IV5 | LFLSLILALFLVN SAVVSSLD | Negative |
| Q86IV5 | VSSLDSCSICVDFVGNSLND   | Negative |
| Q86LE5 | AIFVSALLVVALVASTSAHH   | Negative |
| Q86LE5 | DDALVTELECIRLRISPETN   | Negative |
| Q86LE5 | TKGDDALVTELECIRLRISP   | Negative |
| Q86LE5 | FVSALLVVALVASTSAHHQE   | Negative |
| Q86LE5 | ALVASTSAHHQELCTKGDDA   | Negative |
| Q86LE5 | ALLVVALVASTSAHHQELCT   | Negative |
| Q86LE5 | HHQELCTKGDDALVTELECI   | Negative |
| Q86LE5 | ELCTKGDDALVTELECIRLR   | Negative |
| Q86LE5 | STSAHHQELCTKGDDALVTE   | Negative |
| Q86LE5 | LCTKGDDALVTELECIRLR    | Negative |
| Q86LE5 | KAIFVSALLVVALVASTSAH   | Negative |
| Q86LE5 | LLVVALVASTSAHHQELCTK   | Negative |

|        |                      |          |
|--------|----------------------|----------|
| Q86LE5 | KGDDALVTELECIRLRISPE | Negative |
| Q86LE5 | GDDALVTELECIRLRISPET | Negative |
| Q86LE5 | VALVASTSAHHQELCTKGDD | Negative |
| Q86LE5 | LVASTSAHHQELCTKGDDAL | Negative |
| Q86LE5 | ASTSAHHQELCTKGDDALVT | Negative |
| Q86LE5 | MKAIFVSALLVVALVASTSA | Negative |
| Q86LE5 | VASTSAHHQELCTKGDDALV | Negative |
| Q86LE5 | LVVALVASTSAHHQELCTKG | Negative |
| Q86LE5 | TSAHHQELCTKGDDALVTEL | Negative |
| Q86LE5 | VVALVASTSAHHQELCTKGD | Negative |
| Q86LE5 | HQELCTKGDDALVTELECIR | Negative |
| Q86LE5 | SALLVVALVASTSAHHQELC | Negative |
| Q86LE5 | CTKGDDALVTELECIRLRIS | Negative |
| Q86LE5 | SAHHQELCTKGDDALVTELE | Negative |
| Q86LE5 | QELCTKGDDALVTELECIRL | Negative |
| Q86LE5 | AHHQELCTKGDDALVTELEC | Negative |
| Q86LE5 | IFVSALLVVALVASTSAHHQ | Negative |
| Q86QT3 | SRCAKYGYQECQDCCKNAG  | Negative |
| Q86QT3 | DRDSCVDKSRCAKYGYQEC  | Negative |
| Q86QT3 | ILIMIISLMIMGVEMDRDS  | Negative |
| Q86QT3 | MIMGVEMDRDSCVDKSRCAK | Negative |
| Q86QT3 | VEMDRDSCVDKSRCAKYGY  | Negative |
| Q86QT3 | IMIISLMIMGVEMDRDSCV  | Negative |
| Q86QT3 | IIASLMIMGVEMDRDSCVDK | Negative |
| Q86QT3 | MKVLILIMIISLMIMGVEM  | Negative |
| Q86QT3 | MGVEMDRDSCVDKSRCAKYG | Negative |
| Q86QT3 | IMGVEMDRDSCVDKSRCAKY | Negative |
| Q86QT3 | RCAKYGYQECQDCCKNAGH  | Negative |
| Q86QT3 | LILIMIISLMIMGVEMDRD  | Negative |
| Q86QT3 | CVDKSRCAKYGYQECQDCC  | Negative |
| Q86QT3 | MIISLMIMGVEMDRDSCVD  | Negative |
| Q86QT3 | DKSRCAKYGYQECQDCCKN  | Negative |
| Q86QT3 | KVLILIMIISLMIMGVEMD  | Negative |
| Q86QT3 | SCVDKSRCAKYGYQECQDC  | Negative |
| Q86QT3 | VLILIMIISLMIMGVEMDR  | Negative |
| Q86QT3 | KSRCAKYGYQECQDCCKNA  | Negative |
| Q86QT3 | GVEMDRDSCVDKSRCAKYGY | Negative |
| Q86QT3 | LMIMGVEMDRDSCVDKSRCA | Negative |
| Q86QT3 | IASLMIMGVEMDRDSCVDKS | Negative |
| Q86QT3 | EMDRDSCVDKSRCAKYGYQ  | Negative |
| Q86QT3 | RDSCVDKSRCAKYGYQECQ  | Negative |
| Q86QT3 | MDRDSCVDKSRCAKYGYQE  | Negative |
| Q86QT3 | VDKSRCAKYGYQECQDCCK  | Negative |
| Q86QT3 | DSCVDKSRCAKYGYQECQD  | Negative |
| Q86QT3 | SLMIMGVEMDRDSCVDKSR  | Negative |
| Q86QT3 | ASLMIMGVEMDRDSCVDKSR | Negative |

|        |                        |          |
|--------|------------------------|----------|
| Q86SC0 | KTLTFYTLLLCAALYSNFFD   | Negative |
| Q86SC0 | YTLLCAALYSNFFDCKAVA    | Negative |
| Q86SC0 | AALYSNFFDCKAVADAELPK   | Negative |
| Q86SC0 | LYSNFFDCKAVADAELPKLP   | Negative |
| Q86SC0 | LLLCAALYSNFFDCKAVADA   | Negative |
| Q86SC0 | CKAVADAELPKLPDDKVLIR   | Negative |
| Q86SC0 | TLLCAALYSNFFDCKAVAD    | Negative |
| Q86SC0 | DKAVADAELPKLPDDKVLIR   | Negative |
| Q86SC0 | ADAELPKLPDDKVLIRSRSN   | Negative |
| Q86SC0 | LLCAALYSNFFDCKAVADAE   | Negative |
| Q86SC0 | DAELPKLPDDKVLIRSRNC    | Negative |
| Q86SC0 | LPKLPDDKVLIRSRSNCPKG   | Negative |
| Q86SC0 | LTFYTLLLCAALYSNFFDCK   | Negative |
| Q86SC0 | FFDCKAVADAELPKLPDDKV   | Negative |
| Q86SC0 | SNFFDCKAVADAELPKLPDD   | Negative |
| Q86SC0 | AVADAELPKLPDDKVLIRSR   | Negative |
| Q86SC0 | ELPKLPDDKVLIRSRSNCPK   | Negative |
| Q86SC0 | LCAALYSNFFDCKAVADAEL   | Negative |
| Q86SC0 | AELPKLPDDKVLIRSRSNCP   | Negative |
| Q86SC0 | VADAELPKLPDDKVLIRSR    | Negative |
| Q86SC0 | TFYTLLLCAALYSNFFDCKA   | Negative |
| Q86SC0 | TLTFYTLLLCAALYSNFFDC   | Negative |
| Q86SC0 | FYTLLLCAALYSNFFDCKAV   | Negative |
| Q86SC0 | YSNFFDCKAVADAELPKLPD   | Negative |
| Q86SC0 | FDCKAVADAELPKLPDDKVL   | Negative |
| Q86SC0 | NFFDCKAVADAELPKLPDDK   | Negative |
| Q86SC0 | KAVADAELPKLPDDKVLIRS   | Negative |
| Q86SC0 | MKTLTFYTLLLCAALYSNFF   | Negative |
| Q86SC0 | ALYSNFFDCKAVADAELPKL   | Negative |
| Q86SD9 | YLV MISLALLFMIGVESARD  | Negative |
| Q86SD9 | GYIAQPNNCVYH CIPLSPGC  | Negative |
| Q86SD9 | AQPNNCVYH CIPLSPGCDKL  | Negative |
| Q86SD9 | FMIGVESARDGYIAQPNNCV   | Negative |
| Q86SD9 | PNNCVYH CIPLSPGCDKL CR | Negative |
| Q86SD9 | IAQPNNCVYH CIPLSPGCDK  | Negative |
| Q86SD9 | NCVYH CIPLSPGCDKL CREN | Negative |
| Q86SD9 | YIAQPNNCVYH CIPLSPGCD  | Negative |
| Q86SD9 | LALLFMIGVESARDGYIAQP   | Negative |
| Q86SD9 | ARDGYIAQPNNCVYH CIPLS  | Negative |
| Q86SD9 | NYLV MISLALLFMIGVESAR  | Negative |
| Q86SD9 | LLFMIGVESARDGYIAQPNN   | Negative |
| Q86SD9 | RDGYIAQPNNCVYH CIPLSP  | Negative |
| Q86SD9 | ISLALLFMIGVESARDGYIA   | Negative |
| Q86SD9 | NNCVYH CIPLSPGCDKL CRE | Negative |
| Q86SD9 | LFMIGVESARDGYIAQPNNC   | Negative |
| Q86SD9 | IGVESARDGYIAQPNNCVYH   | Negative |

|        |                      |          |
|--------|----------------------|----------|
| Q86SD9 | SARDGYIAQPNNVCYHCIPL | Negative |
| Q86SD9 | MIGVESARDGYIAQPNNCVY | Negative |
| Q86SD9 | MISLALLFMIGVESARDGYI | Negative |
| Q86SD9 | SLALLFMIGVESARDGYIAQ | Negative |
| Q86SD9 | ESARDGYIAQPNNVCYHCIP | Negative |
| Q86SD9 | QPNNVCYHCIPLSPGCDKLC | Negative |
| Q86SD9 | ALLFMIGVESARDGYIAQPN | Negative |
| Q86SD9 | VESARDGYIAQPNNVCYHCI | Negative |
| Q86SD9 | MNYLVMISLALLFMIGVESA | Negative |
| Q86SD9 | GVESARDGYIAQPNNVCYHC | Negative |
| Q86SD9 | LVMISLALLFMIGVESARDG | Negative |
| Q86SD9 | DGYIAQPNNVCYHCIPLSPG | Negative |
| Q86SE0 | LITISLALLMTGVASGVRD  | Negative |
| Q86SE0 | MTGVASGVRDGYIADAGNCG | Negative |
| Q86SE0 | RDGYIADAGNCGYTCVANDY | Negative |
| Q86SE0 | ITISLALLMTGVASGVRDG  | Negative |
| Q86SE0 | VRDGYIADAGNCGYTCVAND | Negative |
| Q86SE0 | DGYIADAGNCGYTCVANDYC | Negative |
| Q86SE0 | YLITISLALLMTGVASGVR  | Negative |
| Q86SE0 | NYLITISLALLMTGVASGV  | Negative |
| Q86SE0 | ALLMTGVASGVRDGYIADA  | Negative |
| Q86SE0 | SGVRDGYIADAGNCGYTCVA | Negative |
| Q86SE0 | GVRDGYIADAGNCGYTCVAN | Negative |
| Q86SE0 | GVASGVRDGYIADAGNCGYT | Negative |
| Q86SE0 | ISLALLMTGVASGVRDGYI  | Negative |
| Q86SE0 | TGVASGVRDGYIADAGNCGY | Negative |
| Q86SE0 | DAGNCGYTCVANDYCNTECT | Negative |
| Q86SE0 | AGNCGYTCVANDYCNTECTK | Negative |
| Q86SE0 | ASGVRDGYIADAGNCGYTCV | Negative |
| Q86SE0 | MNYLITISLALLMTGVASG  | Negative |
| Q86SE0 | VASGVRDGYIADAGNCGYTC | Negative |
| Q86SE0 | GNCGYTCVANDYCNTECTKN | Negative |
| Q86SE0 | LMTGVASGVRDGYIADAGNC | Negative |
| Q86SE0 | ADAGNCGYTCVANDYCNTEC | Negative |
| Q86SE0 | LLMTGVASGVRDGYIADAGN | Negative |
| Q86SE0 | SLALLMTGVASGVRDGYIA  | Negative |
| Q86SE0 | LLMTGVASGVRDGYIADAG  | Negative |
| Q86SE0 | IADAGNCGYTCVANDYCNTE | Negative |
| Q86SE0 | LALLMTGVASGVRDGYIAD  | Negative |
| Q86SE0 | YIADAGNCGYTCVANDYCN  | Negative |
| Q86SE0 | GYIADAGNCGYTCVANDYCN | Negative |
| Q86SE1 | LVMISLALLMIGVESVRDG  | Negative |
| Q86SE1 | YIVYPHNCVYHCIPSCDGLC | Negative |
| Q86SE1 | GYIVYPHNCVYHCIPSCDGL | Negative |
| Q86SE1 | VYPHNCVYHCIPSCDGLCKE | Negative |
| Q86SE1 | LLMIGVESVRDGYIVYPHN  | Negative |

|        |                       |          |
|--------|-----------------------|----------|
| Q86SE1 | DGYIVYPHNCVYHCIPSCDG  | Negative |
| Q86SE1 | ALLLMIGVESVRDGYIVYPH  | Negative |
| Q86SE1 | LMIGVESVRDGYIVYPHNCV  | Negative |
| Q86SE1 | RDGYIVYPHNCVYHCIPSCD  | Negative |
| Q86SE1 | HNCVYHCIPSCDGLCKENGA  | Negative |
| Q86SE1 | VESVRDGYIVYPHNCVYHCI  | Negative |
| Q86SE1 | MIGVESVRDGYIVYPHNCVY  | Negative |
| Q86SE1 | IGVESVRDGYIVYPHNCVYH  | Negative |
| Q86SE1 | SVRDGYIVYPHNCVYHCIPS  | Negative |
| Q86SE1 | SLALLLMIGVESVRDGYIVY  | Negative |
| Q86SE1 | MISLALLLMIGVESVRDGYI  | Negative |
| Q86SE1 | GVESVRDGYIVYPHNCVYHC  | Negative |
| Q86SE1 | YLV MISLALLLMIGVESVRD | Negative |
| Q86SE1 | NCVYHCIPSCDGLCKENGAT  | Negative |
| Q86SE1 | YPHNCVYHCIPSCDGLCKEN  | Negative |
| Q86SE1 | ESVRDGYIVYPHNCVYHCIP  | Negative |
| Q86SE1 | LLMIGVESVRDGYIVYPHNC  | Negative |
| Q86SE1 | LALLLMIGVESVRDGYIVYP  | Negative |
| Q86SE1 | IVYPHNCVYHCIPSCDGLCK  | Negative |
| Q86SE1 | ISLALLLMIGVESVRDGYIV  | Negative |
| Q86SE1 | NYLV MISLALLLMIGVESVR | Negative |
| Q86SE1 | PHNCVYHCIPSCDGLCKENG  | Negative |
| Q86SE1 | MNYLV MISLALLLMIGVESV | Negative |
| Q86SE1 | VRDGYIVYPHNCVYHCIPSC  | Negative |
| Q86WA6 | RGVLRRLRLLSALKPGIHVP  | Negative |
| Q86WA6 | VLGGRGVLRLRLLSALKPG   | Negative |
| Q86WA6 | GPAAAFGTSVTS AKVAVNGV | Negative |
| Q86WA6 | KPGIHVPRAGPAAAFGTSVT  | Negative |
| Q86WA6 | RLLLSALKPGIHVPRAGPAA  | Negative |
| Q86WA6 | GRGVLRLRLLSALKPGIHV   | Negative |
| Q86WA6 | MVAVLGGRGVLRLRLLSAL   | Negative |
| Q86WA6 | HVPRAGPAAAFGTSVTS AKV | Negative |
| Q86WA6 | VLRLRLLSALKPGIHVPRA   | Negative |
| Q86WA6 | SALKPGIHVPRAGPAAAFGT  | Negative |
| Q86WA6 | VAVLGGRGVLRLRLLSALK   | Negative |
| Q86WA6 | LRLLSALKPGIHVPRAGPA   | Negative |
| Q86WA6 | IHVPRAGPAAAFGTSVTS AK | Negative |
| Q86WA6 | LLLSALKPGIHVPRAGPAAA  | Negative |
| Q86WA6 | ALKPGIHVPRAGPAAAFGTS  | Negative |
| Q86WA6 | PRAGPAAAFGTSVTS AKVAV | Negative |
| Q86WA6 | LGGRGVLRLRLLSALKPGI   | Negative |
| Q86WA6 | LKPGIHVPRAGPAAAFGTSV  | Negative |
| Q86WA6 | AGPAAAFGTSVTS AKVAVNG | Negative |
| Q86WA6 | GGRGVLRLRLLSALKPGIH   | Negative |
| Q86WA6 | LRLRLLSALKPGIHVPRAG   | Negative |
| Q86WA6 | RLRLLSALKPGIHVPRAGP   | Negative |

|        |                      |          |
|--------|----------------------|----------|
| Q86WA6 | AVLGGRGVLRLRLLLSALKP | Negative |
| Q86WA6 | VPRAGPAAAFGTSVTSAKVA | Negative |
| Q86WA6 | LLSALKPGIHVPRAGPAAAF | Negative |
| Q86WA6 | LSALKPGIHVPRAGPAAAFG | Negative |
| Q86WA6 | GVLRLRLLLSALKPGIHVPR | Negative |
| Q86WA6 | PGIHVPRAGPAAAFGTSVTS | Negative |
| Q86WA6 | RAGPAAAFGTSVTSAKVAVN | Negative |
| Q86Y78 | ADCLKAAQSRDFTVKDIIYL | Negative |
| Q86Y78 | GPALAWLLLLSLLADCLKAA | Negative |
| Q86Y78 | LKAAQSRDFTVKDIIYLHPS | Negative |
| Q86Y78 | PALAWLLLLSLLADCLKAAQ | Negative |
| Q86Y78 | QSRDFTVKDIIYLHPSTTPY | Negative |
| Q86Y78 | LLLLSLLADCLKAAQSRDFT | Negative |
| Q86Y78 | SLLADCLKAAQSRDFTVKDI | Negative |
| Q86Y78 | LADCLKAAQSRDFTVKDIIY | Negative |
| Q86Y78 | WLLLLSLLADCLKAAQSRDF | Negative |
| Q86Y78 | ALAWLLLLSLLADCLKAAQS | Negative |
| Q86Y78 | LSLLADCLKAAQSRDFTVKD | Negative |
| Q86Y78 | TVKDIIYLHPSTTPYPGGFK | Negative |
| Q86Y78 | AQSRDFTVKDIIYLHPSTTP | Negative |
| Q86Y78 | LLSLLADCLKAAQSRDFTV  | Negative |
| Q86Y78 | LLSLLADCLKAAQSRDFTVK | Negative |
| Q86Y78 | SRDFTVKDIIYLHPSTTPYP | Negative |
| Q86Y78 | AAQSRDFTVKDIIYLHPSTT | Negative |
| Q86Y78 | PGPALAWLLLLSLLADCLKA | Negative |
| Q86Y78 | CLKAAQSRDFTVKDIIYLHP | Negative |
| Q86Y78 | DFTVKDIIYLHPSTTPYPGG | Negative |
| Q86Y78 | LLADCLKAAQSRDFTVKDII | Negative |
| Q86Y78 | VKDIIYLHPSTTPYPGGFKC | Negative |
| Q86Y78 | KAAQSRDFTVKDIIYLHPST | Negative |
| Q86Y78 | EPGPALAWLLLLSLLADCLK | Negative |
| Q86Y78 | LAWLLLLSLLADCLKAAQSR | Negative |
| Q86Y78 | RDFTVKDIIYLHPSTTPYPG | Negative |
| Q86Y78 | FTVKDIIYLHPSTTPYPGGF | Negative |
| Q86Y78 | DCLKAAQSRDFTVKDIIYLH | Negative |
| Q86Y78 | MEPGPALAWLLLLSLLADCL | Negative |
| Q875I9 | NNLKQIYDKHKGKCSKVLAK | Negative |
| Q875I9 | NLPNNLKQIYDKHKGKCSKV | Negative |
| Q875I9 | VALVTGATAYNLPNNLKQIY | Negative |
| Q875I9 | KHKGKCSKVLAKGFTNGDAS | Negative |
| Q875I9 | TVALVTGATAYNLPNNLKQI | Negative |
| Q875I9 | GATAYNLPNNLKQIYDKHKG | Negative |
| Q875I9 | SEILTVALVTGATAYNLPNN | Negative |
| Q875I9 | LPNNLKQIYDKHKGKCSKVL | Negative |
| Q875I9 | ALVTGATAYNLPNNLKQIYD | Negative |
| Q875I9 | YDKHKGKCSKVLAKGFTNGD | Negative |



|        |                       |          |
|--------|-----------------------|----------|
| Q875I9 | IYDKHKGKCSKVLAKGFTNG  | Negative |
| Q875I9 | RLSEILTVALTGTATAYNLP  | Negative |
| Q875I9 | KQIYDKHKGKCSKVLAKGFT  | Negative |
| Q875I9 | MRLSEILTVALTGTATAYNL  | Negative |
| Q875I9 | QIYDKHKGKCSKVLAKGFTN  | Negative |
| Q875I9 | LVTGTATAYNLPNNLKQIYDK | Negative |
| Q875I9 | TAYNLPNNLKQIYDKHKGKC  | Negative |
| Q875I9 | EILTVALTGTATAYNLPNNL  | Negative |
| Q875I9 | LTVALTGTATAYNLPNNLKQ  | Negative |
| Q875I9 | DKHKGKCSKVLAKGFTNGDA  | Negative |
| Q875I9 | VTGTATAYNLPNNLKQIYDKH | Negative |
| Q875I9 | TGTATAYNLPNNLKQIYDKHK | Negative |
| Q875I9 | NLKQIYDKHKGKCSKVLAKG  | Negative |
| Q875I9 | ATAYNLPNNLKQIYDKHKGK  | Negative |
| Q875I9 | AYNLPNNLKQIYDKHKGKCS  | Negative |
| Q875I9 | PNNLKQIYDKHKGKCSKVL   | Negative |
| Q875I9 | ILTVALTGTATAYNLPNNLK  | Negative |
| Q875I9 | LKQIYDKHKGKCSKVLAKGF  | Negative |
| Q875I9 | YNLPNNLKQIYDKHKGKCSK  | Negative |
| Q8AV97 | ILSLSGTGADFDCCIPGWSAY | Negative |
| Q8AV97 | FDCIPGWSAYDRYCYQAFSK  | Negative |
| Q8AV97 | GTGADFDCCIPGWSAYDRYCY | Negative |
| Q8AV97 | GWSAYDRYCYQAFSKPKNWE  | Negative |
| Q8AV97 | LVVILSLSGTGADFDCCIPGW | Negative |
| Q8AV97 | LSLSGTGADFDCCIPGWSAYD | Negative |
| Q8AV97 | VSFGLLVVILSLSGTGADFD  | Negative |
| Q8AV97 | TGADFDCCIPGWSAYDRYCYQ | Negative |
| Q8AV97 | PGWSAYDRYCYQAFSKPKNW  | Negative |
| Q8AV97 | VILSLSGTGADFDCCIPGWSA | Negative |
| Q8AV97 | LIFVSFGLLVVILSLSGTGA  | Negative |
| Q8AV97 | GLLVVILSLSGTGADFDCCIP | Negative |
| Q8AV97 | IFVSFGLLVVILSLSGTGAD  | Negative |
| Q8AV97 | ERLIFVSFGLLVVILSLSGT  | Negative |
| Q8AV97 | SFGLLVVILSLSGTGADFD   | Negative |
| Q8AV97 | GADFDCCIPGWSAYDRYCYQA | Negative |
| Q8AV97 | CIPGWSAYDRYCYQAFSKPK  | Negative |
| Q8AV97 | VVILSLSGTGADFDCCIPGWS | Negative |
| Q8AV97 | IPGWSAYDRYCYQAFSKPKN  | Negative |
| Q8AV97 | FVSFGLLVVILSLSGTGADF  | Negative |
| Q8AV97 | DCIPGWSAYDRYCYQAFSKP  | Negative |
| Q8AV97 | MERLIFVSFGLLVVILSLSG  | Negative |
| Q8AV97 | ADFDCCIPGWSAYDRYCYQAF | Negative |
| Q8AV97 | DFDCCIPGWSAYDRYCYQAFS | Negative |
| Q8AV97 | SGTGADFDCCIPGWSAYDRYC | Negative |
| Q8AV97 | RLIFVSFGLLVVILSLSGTG  | Negative |
| Q8AV97 | SLSGTGADFDCCIPGWSAYDR | Negative |

|        |                      |          |
|--------|----------------------|----------|
| Q8AV97 | LSGTGADFDCIPGWSAYDRY | Negative |
| Q8AV97 | LLVVILSLSGTGADFDCIPG | Negative |
| Q8AV98 | TSLSGTEAGFCCPLGWSSYD | Negative |
| Q8AV98 | VATSLSGTEAGFCCPLGWSS | Negative |
| Q8AV98 | FIFVSFGFLVVATSLSGTEA | Negative |
| Q8AV98 | VVATSLSGTEAGFCCPLGWS | Negative |
| Q8AV98 | GTEAGFCCPLGWSSYDEHCY | Negative |
| Q8AV98 | SFGFLVVATSLSGTEAGFCC | Negative |
| Q8AV98 | LSGTEAGFCCPLGWSSYDEH | Negative |
| Q8AV98 | LVVATSLSGTEAGFCCPLGW | Negative |
| Q8AV98 | GWSSYDEHCYQVFQQKMNWE | Negative |
| Q8AV98 | AGFCCPLGWSSYDEHCYQVF | Negative |
| Q8AV98 | LGWSSYDEHCYQVFQQKMNW | Negative |
| Q8AV98 | GFCCPLGWSSYDEHCYQVFQ | Negative |
| Q8AV98 | IFVSFGFLVVATSLSGTEAG | Negative |
| Q8AV98 | GQFIFVSFGFLVVATSLSGT | Negative |
| Q8AV98 | VSFGFLVVATSLSGTEAGFC | Negative |
| Q8AV98 | MGQFIFVSFGFLVVATSLSG | Negative |
| Q8AV98 | SGTEAGFCCPLGWSSYDEHC | Negative |
| Q8AV98 | CCPLGWSSYDEHCYQVFQQK | Negative |
| Q8AV98 | FCCPLGWSSYDEHCYQVFQQ | Negative |
| Q8AV98 | PLGWSSYDEHCYQVFQQKMN | Negative |
| Q8AV98 | GFLVVATSLSGTEAGFCCPL | Negative |
| Q8AV98 | CPLGWSSYDEHCYQVFQQKM | Negative |
| Q8AV98 | TEAGFCCPLGWSSYDEHCYQ | Negative |
| Q8AV98 | EAGFCCPLGWSSYDEHCYQV | Negative |
| Q8AV98 | ATSLSGTEAGFCCPLGWSSY | Negative |
| Q8AV98 | SLSGTEAGFCCPLGWSSYDE | Negative |
| Q8AV98 | QFIFVSFGFLVVATSLSGTE | Negative |
| Q8AV98 | FVSFGFLVVATSLSGTEAGF | Negative |
| Q8AV98 | FLVVATSLSGTEAGFCCPLG | Negative |
| Q8AXY1 | VLLVGVEGSLWQFGKMINYV | Negative |
| Q8AXY1 | LWIMAVLLVGVEGSLWQFGK | Negative |
| Q8AXY1 | GSLWQFGKMINYVMGESGVL | Negative |
| Q8AXY1 | FGKMINYVMGESGVLQYLSY | Negative |
| Q8AXY1 | TLWIMAVLLVGVEGSLWQFG | Negative |
| Q8AXY1 | INYVMGESGVLQYLSYGCYC | Negative |
| Q8AXY1 | GVEGSLWQFGKMINYVMGES | Negative |
| Q8AXY1 | WIMAVLLVGVEGSLWQFGKM | Negative |
| Q8AXY1 | MINYVMGESGVLQYLSYGCY | Negative |
| Q8AXY1 | WQFGKMINYVMGESGVLQYL | Negative |
| Q8AXY1 | QFGKMINYVMGESGVLQYLS | Negative |
| Q8AXY1 | VMGESGVLQYLSYGCYCGLG | Negative |
| Q8AXY1 | MRTLWIMAVLLVGVEGSLWQ | Negative |
| Q8AXY1 | KMINYVMGESGVLQYLSYGC | Negative |
| Q8AXY1 | GESGVLQYLSYGCYCGLGGQ | Negative |

|        |                       |          |
|--------|-----------------------|----------|
| Q8AXY1 | LVGVEGSLWQFGKMINYVMG  | Negative |
| Q8AXY1 | LLVGVEGSLWQFGKMINYVM  | Negative |
| Q8AXY1 | VEGSLWQFGKMINYVMGESG  | Negative |
| Q8AXY1 | YVMGESGVLQYLSYG CYCGL | Negative |
| Q8AXY1 | SLWQFGKMINYVMGESGVLQ  | Negative |
| Q8AXY1 | GKMINYVMGESGVLQYLSYG  | Negative |
| Q8AXY1 | LWQFGKMINYVMGESGVLQY  | Negative |
| Q8AXY1 | NYVMGESGVLQYLSYG CYCG | Negative |
| Q8AXY1 | MGESGVLQYLSYG CYCGLGG | Negative |
| Q8AXY1 | IMAVLLVGVEGSLWQFGKMI  | Negative |
| Q8AXY1 | VGVEGSLWQFGKMINYVMGE  | Negative |
| Q8AXY1 | MAVLLVGVEGSLWQFGKMIN  | Negative |
| Q8AXY1 | AVLLVGVEGSLWQFGKMINY  | Negative |
| Q8AXY1 | EGSLWQFGKMINYVMGESGV  | Negative |
| Q8AYA2 | QVLNSLIETLMHLQREFANL  | Negative |
| Q8AYA2 | DETDPDGQVLNSLIETLMHL  | Negative |
| Q8AYA2 | LLLGTFLANGDETDPDGQVL  | Negative |
| Q8AYA2 | MRLILLSGLLLLGTFLANGD  | Negative |
| Q8AYA2 | LSGLLLLGTFLANGDETDPD  | Negative |
| Q8AYA2 | GTFLANGDETDPDGQVLNSL  | Negative |
| Q8AYA2 | LNSLIETLMHLQREFANLKY  | Negative |
| Q8AYA2 | VLNSLIETLMHLQREFANLK  | Negative |
| Q8AYA2 | NSLIETLMHLQREFANLK YA | Negative |
| Q8AYA2 | LLLGTFLANGDETDPDGQV   | Negative |
| Q8AYA2 | SGLLLLGTFLANGDETDPDG  | Negative |
| Q8AYA2 | RLILLSGLLLLGTFLANGDE  | Negative |
| Q8AYA2 | LLGTFLANGDETDPDGQVLN  | Negative |
| Q8AYA2 | NGDETDPDGQVLNSLIETLM  | Negative |
| Q8AYA2 | ETDPDGQVLNSLIETLMHLQ  | Negative |
| Q8AYA2 | TFLANGDETDPDGQVLNSLI  | Negative |
| Q8AYA2 | TDPDGQVLNSLIETLMHLQR  | Negative |
| Q8AYA2 | PDGQVLNSLIETLMHLQREF  | Negative |
| Q8AYA2 | GLLLLGTFLANGDETDPDGQ  | Negative |
| Q8AYA2 | LILLSGLLLLGTFLANGDET  | Negative |
| Q8AYA2 | LANGDETDPDGQVLNSLIET  | Negative |
| Q8AYA2 | GQVLNSLIETLMHLQREFAN  | Negative |
| Q8AYA2 | ILLSGLLLLGTFLANGDETD  | Negative |
| Q8AYA2 | GDETDPDGQVLNSLIETLMH  | Negative |
| Q8AYA2 | DGQVLNSLIETLMHLQREFA  | Negative |
| Q8AYA2 | FLANGDETDPDGQVLNSLIE  | Negative |
| Q8AYA2 | DPDGQVLNSLIETLMHLQRE  | Negative |
| Q8AYA2 | ANGDETDPDGQVLNSLIETL  | Negative |
| Q8AYA2 | LGTFLANGDETDPDGQVLNS  | Negative |
| Q8BHN3 | VCLGITLAVDRSNFKTCDES  | Negative |
| Q8BHN3 | SLVLAYLG VCLGITLAVDRS | Negative |
| Q8BHN3 | YLG VCLGITLAVDRSNFKTC | Negative |

|        |                        |          |
|--------|------------------------|----------|
| Q8BHN3 | RRRRSWLSLVLAYLGVCLGI   | Negative |
| Q8BHN3 | GVCLGITLAVDRSNFKTCDE   | Negative |
| Q8BHN3 | GITLAVDRSNFKTCDESSFC   | Negative |
| Q8BHN3 | LSLVLAYLGVCLGITLAVDR   | Negative |
| Q8BHN3 | VLAYLGVCLGITLAVDRSNF   | Negative |
| Q8BHN3 | AARRRRSWLSLVLAYLGVCL   | Negative |
| Q8BHN3 | AIAAVAARRRRSWLSLVLAY   | Negative |
| Q8BHN3 | RSWLSLVLAYLGVCLGITLA   | Negative |
| Q8BHN3 | AVAARRRRSWLSLVLAYLGV   | Negative |
| Q8BHN3 | SWLSLVLAYLGVCLGITLAV   | Negative |
| Q8BHN3 | RRSWLSLVLAYLGVCLGITL   | Negative |
| Q8BHN3 | ITLAVDRSNFKTCDESSFCK   | Negative |
| Q8BHN3 | MAAIAAVAARRRRSWLSLVL   | Negative |
| Q8BHN3 | AYLGVCLGITLAVDRSNFKT   | Negative |
| Q8BHN3 | TLAVDRSNFKTCDESSFCKR   | Negative |
| Q8BHN3 | AAIAAVAARRRRSWLSLVLA   | Negative |
| Q8BHN3 | LGITLAVDRSNFKTCDESSF   | Negative |
| Q8BHN3 | RRRSWLSLVLAYLGVCLGIT   | Negative |
| Q8BHN3 | CLGITLAVDRSNFKTCDESS   | Negative |
| Q8BHN3 | LGVCLGITLAVDRSNFKTCD   | Negative |
| Q8BHN3 | WLSLVLAYLGVCLGITLAVD   | Negative |
| Q8BHN3 | AAVAARRRRSWLSLVLAYLG   | Negative |
| Q8BHN3 | IAAVAARRRRSWLSLVLAYL   | Negative |
| Q8BHN3 | VAARRRRSWLSLVLAYLGV    | Negative |
| Q8BHN3 | LAYLGVCLGITLAVDRSNFK   | Negative |
| Q8BHN3 | ARRRRSWLSLVLAYLGVCLG   | Negative |
| Q8BHP7 | LRLLLVL VLLRAGPVWP     | Negative |
| Q8BHP7 | VLLRAGPVWPDSKVFSDDLQ   | Negative |
| Q8BHP7 | VLPRYLQLRLLLVL VLL     | Negative |
| Q8BHP7 | YLQLRLLLVL VLLRAGP     | Negative |
| Q8BHP7 | LLRAGPVWPDSKVFSDDLQV   | Negative |
| Q8BHP7 | QLRLLLVL VLLRAGPVW     | Negative |
| Q8BHP7 | LPRYLQLRLLLVL VLLR     | Negative |
| Q8BHP7 | VWPDSKVFSDDLQVRMTSEG   | Negative |
| Q8BHP7 | MEAAVLPRYLQLRLLLVL     | Negative |
| Q8BHP7 | LRAGPVWPDSKVFSDDLQVR   | Negative |
| Q8BHP7 | RYLQLRLLLVL VLLRAG     | Negative |
| Q8BHP7 | AVLPRYLQLRLLLVL VLL    | Negative |
| Q8BHP7 | AAVLPRYLQLRLLLVL VLL   | Negative |
| Q8BHP7 | LLVLLLVL VLLRAGPVWPDSK | Negative |
| Q8BHP7 | RAGPVWPDSKVFSDDLQVRM   | Negative |
| Q8BHP7 | EAAVLPRYLQLRLLLVL VLL  | Negative |
| Q8BHP7 | LLLVL VLLRAGPVWPDSKVFS | Negative |
| Q8BHP7 | PRYLQLRLLLVL VLLRA     | Negative |
| Q8BHP7 | LVLLRAGPVWPDSKVFSDDL   | Negative |
| Q8BHP7 | LLLVL VLLRAGPVWPDSKVFS | Negative |

|        |                       |          |
|--------|-----------------------|----------|
| Q8BHP7 | LLLVLLLLVLLRAGPVWPDS  | Negative |
| Q8BHP7 | LLVLLRAGPVWPDSKVFSDL  | Negative |
| Q8BHP7 | PVWPDSKVFSDLQVRMTSE   | Negative |
| Q8BHP7 | LVLLLLVLLRAGPVWPDSKV  | Negative |
| Q8BHP7 | LQLRLLLVLLLLVLLRAGPV  | Negative |
| Q8BHP7 | RLLLVLLLLVLLRAGPVWPD  | Negative |
| Q8BHP7 | GPVWPDSKVFSDLQVRMTS   | Negative |
| Q8BHP7 | AGPVWPDSKVFSDLQVRMT   | Negative |
| Q8BHP7 | AAAVLPRYLQLRLLLVLLLL  | Negative |
| Q8BK48 | QDSASPIRNTHTGQVRGSLV  | Negative |
| Q8BK48 | CGVLLLVLHVQGQDSASPIR  | Negative |
| Q8BK48 | VQGQDSASPIRNTHTGQVRG  | Negative |
| Q8BK48 | ASPIRNTHTGQVRGSLVHVK  | Negative |
| Q8BK48 | GVLLLVLHVQGQDSASPIRN  | Negative |
| Q8BK48 | PLYKLLGWLNAVACGVLLLLV | Negative |
| Q8BK48 | YKLLGWLNAVACGVLLLLVLH | Negative |
| Q8BK48 | HVQGQDSASPIRNTHTGQVR  | Negative |
| Q8BK48 | LYKLLGWLNAVACGVLLLLVL | Negative |
| Q8BK48 | VLHVQGQDSASPIRNTHTGQ  | Negative |
| Q8BK48 | VLLLVLHVQGQDSASPIRNT  | Negative |
| Q8BK48 | LGWLNAVACGVLLLLVLHVQG | Negative |
| Q8BK48 | LLVLHVQGQDSASPIRNTHT  | Negative |
| Q8BK48 | LHVQGQDSASPIRNTHTGQV  | Negative |
| Q8BK48 | ACGVLLLLVLHVQGQDSASPI | Negative |
| Q8BK48 | MPLYKLLGWLNAVACGVLLLL | Negative |
| Q8BK48 | QGQDSASPIRNTHTGQVRGS  | Negative |
| Q8BK48 | GQDSASPIRNTHTGQVRGSL  | Negative |
| Q8BK48 | KLLGWLNAVACGVLLLLVLHV | Negative |
| Q8BK48 | GWLNAVACGVLLLLVLHVQGQ | Negative |
| Q8BK48 | VACGVLLLLVLHVQGQDSASP | Negative |
| Q8BK48 | NAVACGVLLLLVLHVQGQDSA | Negative |
| Q8BK48 | WLNAVACGVLLLLVLHVQGQD | Negative |
| Q8BK48 | SASPIRNTHTGQVRGSLVHV  | Negative |
| Q8BK48 | LLGWLNAVACGVLLLLVLHVQ | Negative |
| Q8BK48 | DSASPIRNTHTGQVRGSLVH  | Negative |
| Q8BK48 | LVLHVQGQDSASPIRNTHTG  | Negative |
| Q8BK48 | LLVLHVQGQDSASPIRNTH   | Negative |
| Q8BK48 | LNAVACGVLLLLVLHVQGQDS | Negative |
| Q8C1Q4 | GLLAASAHAGYSEDRCSWRG  | Negative |
| Q8C1Q4 | MLVATLLCALCCGLLAASAH  | Negative |
| Q8C1Q4 | CSWRGSGLTQEPGSVGQLTL  | Negative |
| Q8C1Q4 | CALCCGLLAASAHAGYSEDR  | Negative |
| Q8C1Q4 | AGYSEDRCSWRGSGLTQEPG  | Negative |
| Q8C1Q4 | EDRCSWRGSGLTQEPGSVGQ  | Negative |
| Q8C1Q4 | ATLLCALCCGLLAASAHAGY  | Negative |
| Q8C1Q4 | CCGLLAASAHAGYSEDRCSW  | Negative |

|        |                       |          |
|--------|-----------------------|----------|
| Q8C1Q4 | LVATLLCALCCGLLAASAH   | Negative |
| Q8C1Q4 | DRCSWRGSGLTQEPGSVGQL  | Negative |
| Q8C1Q4 | LLCALCCGLLAASAHAGYSE  | Negative |
| Q8C1Q4 | RCSWRGSGLTQEPGSVGQLT  | Negative |
| Q8C1Q4 | LLAASAHAGYSEDRCSSWRGS | Negative |
| Q8C1Q4 | LAASAHAGYSEDRCSSWRGSG | Negative |
| Q8C1Q4 | GYSEDRCSSWRGSGLTQEPGS | Negative |
| Q8C1Q4 | AHAGYSEDRCSSWRGSGLTQE | Negative |
| Q8C1Q4 | TLLCALCCGLLAASAHAGYS  | Negative |
| Q8C1Q4 | ASAHAGYSEDRCSSWRGSGLT | Negative |
| Q8C1Q4 | AASAHAGYSEDRCSSWRGSG  | Negative |
| Q8C1Q4 | SWRGSGLTQEPGSVGQLTLD  | Negative |
| Q8C1Q4 | VATLLCALCCGLLAASAHAG  | Negative |
| Q8C1Q4 | CGLLAASAHAGYSEDRCSSWR | Negative |
| Q8C1Q4 | HAGYSEDRCSSWRGSGLTQEP | Negative |
| Q8C1Q4 | LCCGLLAASAHAGYSEDRCSS | Negative |
| Q8C1Q4 | ALCCGLLAASAHAGYSEDRCS | Negative |
| Q8C1Q4 | SEDRCSWRGSGLTQEPGSVG  | Negative |
| Q8C1Q4 | WRGSGLTQEPGSVGQLTDC   | Negative |
| Q8C1Q4 | SAHAGYSEDRCSSWRGSGLTQ | Negative |
| Q8C1Q4 | YSEDRCSSWRGSGLTQEPGSV | Negative |
| Q8CEK3 | AGPENVIKEPNCTMYKSKSE  | Negative |
| Q8CEK3 | SVNIFAGPENVIKEPNCTMY  | Negative |
| Q8CEK3 | FLFILTLVLLPYSVFSVNIF  | Negative |
| Q8CEK3 | LVLLPYSVFSVNIFAGPENV  | Negative |
| Q8CEK3 | LLPYSVFSVNIFAGPENVIK  | Negative |
| Q8CEK3 | WIKFLFILTLVLLPYSVFSV  | Negative |
| Q8CEK3 | TLVLLPYSVFSVNIFAGPEN  | Negative |
| Q8CEK3 | LTLVLLPYSVFSVNIFAGPE  | Negative |
| Q8CEK3 | ILTLVLLPYSVFSVNIFAGP  | Negative |
| Q8CEK3 | NIFAGPENVIKEPNCTMYKS  | Negative |
| Q8CEK3 | STWIKFLFILTLVLLPYSVF  | Negative |
| Q8CEK3 | TWIKFLFILTLVLLPYSVFS  | Negative |
| Q8CEK3 | FILTLVLLPYSVFSVNIFAG  | Negative |
| Q8CEK3 | IFAGPENVIKEPNCTMYKSK  | Negative |
| Q8CEK3 | YSVFSVNIFAGPENVIKEPN  | Negative |
| Q8CEK3 | FAGPENVIKEPNCTMYKSKS  | Negative |
| Q8CEK3 | PENVIKEPNCTMYKSKSECS  | Negative |
| Q8CEK3 | IKFLFILTLVLLPYSVFSVN  | Negative |
| Q8CEK3 | VLLPYSVFSVNIFAGPENVI  | Negative |
| Q8CEK3 | SSTWIKFLFILTLVLLPYSV  | Negative |
| Q8CEK3 | FSVNIFAGPENVIKEPNCTM  | Negative |
| Q8CEK3 | PYSVFSVNIFAGPENVIKEP  | Negative |
| Q8CEK3 | GPENVIKEPNCTMYKSKSEC  | Negative |
| Q8CEK3 | VNIFAGPENVIKEPNCTMYK  | Negative |
| Q8CEK3 | KFLFILTLVLLPYSVFSVNI  | Negative |

|        |                       |          |
|--------|-----------------------|----------|
| Q8CEK3 | SVFSVNIFAGPENVIKEPNC  | Negative |
| Q8CEK3 | VFSVNIFAGPENVIKEPNCT  | Negative |
| Q8CEK3 | LPYSVFSVNIFAGPENVIKE  | Negative |
| Q8CEK3 | MSSTWIKFLFILTLVLLPYS  | Negative |
| Q8DJE2 | GWTIAPATALAAAGVDNYVI  | Negative |
| Q8DJE2 | HFWQRSIGWLCGGLLILLG   | Negative |
| Q8DJE2 | GLLILLGWTIAPATALAAA   | Negative |
| Q8DJE2 | IAPATALAAAGVDNYVIQYL  | Negative |
| Q8DJE2 | WTIAPATALAAAGVDNYVIQ  | Negative |
| Q8DJE2 | GWLCGGLLILLGWTIAPAT   | Negative |
| Q8DJE2 | LGWTIAPATALAAAGVDNYV  | Negative |
| Q8DJE2 | LLLGWTIAPATALAAAGVDN  | Negative |
| Q8DJE2 | LILLGWTIAPATALAAAGV   | Negative |
| Q8DJE2 | FWQRSIGWLCGGLLILLGW   | Negative |
| Q8DJE2 | LCGGLLILLGWTIAPATAL   | Negative |
| Q8DJE2 | SIGWLCGGLLILLGWTIAP   | Negative |
| Q8DJE2 | IGWLCGGLLILLGWTIAPA   | Negative |
| Q8DJE2 | QPHFWQRSIGWLCGGLLILL  | Negative |
| Q8DJE2 | CGGLLILLGWTIAPATALA   | Negative |
| Q8DJE2 | YQPHFWQRSIGWLCGGLLIL  | Negative |
| Q8DJE2 | WQRSIGWLCGGLLILLGWT   | Negative |
| Q8DJE2 | QRSIGWLCGGLLILLGWTI   | Negative |
| Q8DJE2 | MYQPHFWQRSIGWLCGGLLI  | Negative |
| Q8DJE2 | ATALAAAGVDNYVIQYLKVT  | Negative |
| Q8DJE2 | GGLLILLGWTIAPATALAA   | Negative |
| Q8DJE2 | WLCGGLLILLGWTIAPATA   | Negative |
| Q8DJE2 | RSIGWLCGGLLILLGWTIA   | Negative |
| Q8DJE2 | PATALAAAGVDNYVIQYLKV  | Negative |
| Q8DJE2 | TIAPATALAAAGVDNYVIQY  | Negative |
| Q8DJE2 | LLGWTIAPATALAAAGVDNY  | Negative |
| Q8DJE2 | APATALAAAGVDNYVIQYLK  | Negative |
| Q8DJE2 | LLILLGWTIAPATALAAAG   | Negative |
| Q8DJE2 | PHFWQRSIGWLCGGLLILL   | Negative |
| Q8FDW4 | MNKIYSLKYSAATGGLIAVS  | Negative |
| Q8FDW4 | GGLIAVSELAKRVSGKTNRK  | Negative |
| Q8FDW4 | LAKRVSGKTNRKL VATMLSL | Negative |
| Q8FDW4 | SGKTNRKL VATMLSLAVAGT | Negative |
| Q8FDW4 | YSLKYSAATGGLIAVSELA   | Negative |
| Q8FDW4 | GLIAVSELAKRVSGKTNRKL  | Negative |
| Q8FDW4 | IYSLKYSAATGGLIAVSELA  | Negative |
| Q8FDW4 | KYSAATGGLIAVSELAKRVS  | Negative |
| Q8FDW4 | LIAVSELAKRVSGKTNRKL   | Negative |
| Q8FDW4 | ATGGLIAVSELAKRVSGKTN  | Negative |
| Q8FDW4 | SELAKRVSGKTNRKL VATML | Negative |
| Q8FDW4 | AKRVSGKTNRKL VATMLSLA | Negative |
| Q8FDW4 | VSELAKRVSGKTNRKL VATM | Negative |

|        |                       |          |
|--------|-----------------------|----------|
| Q8FDW4 | AVSELAKRVSGKTNRKL VAT | Negative |
| Q8FDW4 | TGGLIAVSELAKRVSGKTNR  | Negative |
| Q8FDW4 | NKIYSLKYSAATGGLIAVSE  | Negative |
| Q8FDW4 | GKTNRKL VATMLSLAVAGTV | Negative |
| Q8FDW4 | RVSGKTNRKL VATMLSLAVA | Negative |
| Q8FDW4 | TNRKL VATMLSLAVAGTVNA | Negative |
| Q8FDW4 | VSGKTNRKL VATMLSLAVAG | Negative |
| Q8FDW4 | AATGGLIAVSELAKRVSGKT  | Negative |
| Q8FDW4 | KTNRKL VATMLSLAVAGTVN | Negative |
| Q8FDW4 | KRVSGKTNRKL VATMLSLAV | Negative |
| Q8FDW4 | IAVSELAKRVSGKTNRKLVA  | Negative |
| Q8FDW4 | SAATGGLIAVSELAKRVSGK  | Negative |
| Q8FDW4 | SLKYSAATGGLIAVSELAKR  | Negative |
| Q8FDW4 | YSAATGGLIAVSELAKRVSG  | Negative |
| Q8FDW4 | ELAKRVSGKTNRKL VATMLS | Negative |
| Q8FDW4 | KIYSLKYSAATGGLIAVSEL  | Negative |
| Q8FDW4 | LKYSAATGGLIAVSELAKRV  | Negative |
| Q8GFE2 | TLGIILSISLAFSVLALPIF  | Negative |
| Q8GFE2 | LALPIFAAVDTTTSATVEAA  | Negative |
| Q8GFE2 | LSISLAFSVLALPIFAAVDT  | Negative |
| Q8GFE2 | KKTLGIILSISLAFSVLALP  | Negative |
| Q8GFE2 | IILSISLAFSVLALPIFAAV  | Negative |
| Q8GFE2 | SLAFSVLALPIFAAVDTTTS  | Negative |
| Q8GFE2 | GIILSISLAFSVLALPIFAA  | Negative |
| Q8GFE2 | LGIILSISLAFSVLALPIFA  | Negative |
| Q8GFE2 | TTTSATVEAATPAAPATPAA  | Negative |
| Q8GFE2 | ISLAFSVLALPIFAAVDTT   | Negative |
| Q8GFE2 | FAAVDTTTSATVEAATPAAP  | Negative |
| Q8GFE2 | VLALPIFAAVDTTTSATVEA  | Negative |
| Q8GFE2 | PIFAAVDTTTSATVEAATPA  | Negative |
| Q8GFE2 | TSATVEAATPAAPATPAATA  | Negative |
| Q8GFE2 | TTSATVEAATPAAPATPAAT  | Negative |
| Q8GFE2 | KTLGIILSISLAFSVLALPI  | Negative |
| Q8GFE2 | IFAAVDTTTSATVEAATPAA  | Negative |
| Q8GFE2 | FSVLALPIFAAVDTTTSATV  | Negative |
| Q8GFE2 | VDTTTSATVEAATPAAPATP  | Negative |
| Q8GFE2 | LPIFAAVDTTTSATVEAATP  | Negative |
| Q8GFE2 | SVLALPIFAAVDTTTSATVE  | Negative |
| Q8GFE2 | AFSVLALPIFAAVDTTTSAT  | Negative |
| Q8GFE2 | AVDTTTSATVEAATPAAPAT  | Negative |
| Q8GFE2 | MKKTLGIILSISLAFSVLAL  | Negative |
| Q8GFE2 | ILSISLAFSVLALPIFAAVD  | Negative |
| Q8GFE2 | ALPIFAAVDTTTSATVEAAT  | Negative |
| Q8GFE2 | LAFSVLALPIFAAVDTTTS   | Negative |
| Q8GFE2 | AAVDTTTSATVEAATPAAPA  | Negative |
| Q8GFE2 | DTTTSATVEAATPAAPATPA  | Negative |



|        |                       |          |
|--------|-----------------------|----------|
| Q8GPG1 | LAATAAFLATSPALPLSADS  | Negative |
| Q8GPG1 | AAFLATSPALPLSADSLNAG  | Negative |
| Q8GPG1 | LSADSLNAGNIRLVDPEETV  | Negative |
| Q8GPG1 | LPLSADSLNAGNIRLVDPEE  | Negative |
| Q8GPG1 | DSL NAGNIRLVDPEETVPVI | Negative |
| Q8GPG1 | PLSADSLNAGNIRLVDPEET  | Negative |
| Q8GPG1 | AFLATSPALPLSADSLNAGN  | Negative |
| Q8GPG1 | SADSLNAGNIRLVDPEETVP  | Negative |
| Q8GPG1 | RFLLAATAAFLATSPALPLS  | Negative |
| Q8GPG1 | ATAAFLATSPALPLSADSLN  | Negative |
| Q8GPG1 | LATSPALPLSADSLNAGNIR  | Negative |
| Q8GPG1 | ADSLNAGNIRLVDPEETVPV  | Negative |
| Q8GPG1 | SPALPLSADSLNAGNIRLVD  | Negative |
| Q8GPG1 | NAGNIRLVDPEETVPVIKIP  | Negative |
| Q8GPG1 | ATSPALPLSADSLNAGNIRL  | Negative |
| Q8GPG1 | LNAGNIRLVDPEETVPVIKI  | Negative |
| Q8GPG1 | LLAATAAFLATSPALPLSAD  | Negative |
| Q8GPG1 | FRFLLAATAAFLATSPALPL  | Negative |
| Q8GPG1 | FLLAATAAFLATSPALPLSA  | Negative |
| Q8GPG1 | MPGFRFLLAATAAFLATSPA  | Negative |
| Q8GPG1 | FLATSPALPLSADSLNAGNI  | Negative |
| Q8GPG1 | AGNIRLVDPEETVPVIKIPD  | Negative |
| Q8GPG1 | GFRFLLAATAAFLATSPALP  | Negative |
| Q8GPG1 | AATAAFLATSPALPLSADSL  | Negative |
| Q8GPG1 | PALPLSADSLNAGNIRLVDP  | Negative |
| Q8GPG1 | TSPALPLSADSLNAGNIRLV  | Negative |
| Q8GPG1 | SLNAGNIRLVDPEETVPVIK  | Negative |
| Q8GPG1 | ALPLSADSLNAGNIRLVDPE  | Negative |
| Q8GPG1 | PGFRFLLAATAAFLATSPAL  | Negative |
| Q8GR64 | KKPLRTSLLMLCLATPLAAL  | Negative |
| Q8GR64 | ATPLAALAAGVDEAAIRATE  | Negative |
| Q8GR64 | EAAIRATEQAGGEWLSHGRT  | Negative |
| Q8GR64 | LLMLCLATPLAALAAGVDEA  | Negative |
| Q8GR64 | VDEAAIRATEQAGGEWLSHG  | Negative |
| Q8GR64 | RTSLLMLCLATPLAALAAGV  | Negative |
| Q8GR64 | TPLAALAAGVDEAAIRATEQ  | Negative |
| Q8GR64 | CLATPLAALAAGVDEAAIRA  | Negative |
| Q8GR64 | MKKPLRTSLLMLCLATPLAA  | Negative |
| Q8GR64 | LAAGVDEAAIRATEQAGGEW  | Negative |
| Q8GR64 | DEAAIRATEQAGGEWLSHGR  | Negative |
| Q8GR64 | AAGVDEAAIRATEQAGGEWL  | Negative |
| Q8GR64 | LMLCLATPLAALAAGVDEAA  | Negative |
| Q8GR64 | AGVDEAAIRATEQAGGEWLS  | Negative |
| Q8GR64 | ALAAGVDEAAIRATEQAGGE  | Negative |
| Q8GR64 | MLCLATPLAALAAGVDEAAI  | Negative |
| Q8GR64 | LATPLAALAAGVDEAAIRAT  | Negative |

|        |                      |          |
|--------|----------------------|----------|
| Q8GR64 | IRATEQAGGEWLSHGRTYAE | Negative |
| Q8GR64 | AIRATEQAGGEWLSHGRTYA | Negative |
| Q8GR64 | AAIRATEQAGGEWLSHGRTY | Negative |
| Q8GR64 | LCLATPLAALAAGVDEAAIR | Negative |
| Q8GR64 | GVDEAAIRATEQAGGEWLSH | Negative |
| Q8GR64 | PLRTSLLMLCLATPLAALAA | Negative |
| Q8GR64 | PLAALAAGVDEAAIRATEQA | Negative |
| Q8GR64 | LAALAAGVDEAAIRATEQAG | Negative |
| Q8GR64 | KPLRTSLLMLCLATPLAALA | Negative |
| Q8GR64 | LRTSLLMLCLATPLAALAAG | Negative |
| Q8GR64 | TSLLMLCLATPLAALAAGVD | Negative |
| Q8GR64 | AALAAGVDEAAIRATEQAGG | Negative |
| Q8GT41 | ISADIVQGTCKKVAQRSPNV | Negative |
| Q8GT41 | CIFFFNLLLLLQAVISADIV | Negative |
| Q8GT41 | ADIVQGTCKKVAQRSPNVNY | Negative |
| Q8GT41 | SFSLCIIFFNLLLLLQAVIS | Negative |
| Q8GT41 | VQGTCKKVAQRSPNVNYDFC | Negative |
| Q8GT41 | KLSFSLCIIFFNLLLLLQAV | Negative |
| Q8GT41 | LLLLLQAVISADIVQGTCKK | Negative |
| Q8GT41 | SADIVQGTCKKVAQRSPNVN | Negative |
| Q8GT41 | LLQAVISADIVQGTCKKVAQ | Negative |
| Q8GT41 | LQAVISADIVQGTCKKVAQR | Negative |
| Q8GT41 | AVISADIVQGTCKKVAQRSP | Negative |
| Q8GT41 | QGTCKKVAQRSPNVNYDFCV | Negative |
| Q8GT41 | FFNLLLLLQAVISADIVQGT | Negative |
| Q8GT41 | LLLQAVISADIVQGTCKKVA | Negative |
| Q8GT41 | GTCKKVAQRSPNVNYDFCVK | Negative |
| Q8GT41 | LLLQAVISADIVQGTCKKV  | Negative |
| Q8GT41 | SLCIIFFNLLLLLQAVISAD | Negative |
| Q8GT41 | DIVQGTCKKVAQRSPNVNYD | Negative |
| Q8GT41 | QAVISADIVQGTCKKVAQRS | Negative |
| Q8GT41 | FNLLLLLQAVISADIVQGTC | Negative |
| Q8GT41 | NLLLLLQAVISADIVQGTCK | Negative |
| Q8GT41 | VISADIVQGTCKKVAQRSPN | Negative |
| Q8GT41 | FFFNLLLLLQAVISADIVQG | Negative |
| Q8GT41 | LSFSLCIIFFNLLLLLQAVI | Negative |
| Q8GT41 | LCIIFFNLLLLLQAVISADI | Negative |
| Q8GT41 | FSLCIIFFNLLLLLQAVISA | Negative |
| Q8GT41 | IVQGTCKKVAQRSPNVNYDF | Negative |
| Q8GT41 | MKLSFSLCIIFFNLLLLLQA | Negative |
| Q8GT41 | TCKKVAQRSPNVNYDFCVKS | Negative |
| Q8GTB6 | SIANPRENFLKCFSKHIPNN | Negative |
| Q8GTB6 | FVCKIIFFFLSFHIQISIAN | Negative |
| Q8GTB6 | AFSFWFVCKIIFFFLSFHIQ | Negative |
| Q8GTB6 | SAFSFWFVCKIIFFFLSFHI | Negative |
| Q8GTB6 | FSFWFVCKIIFFFLSFHIQI | Negative |

|        |                      |          |
|--------|----------------------|----------|
| Q8GTB6 | IQISIANPRENFLKCFSKHI | Negative |
| Q8GTB6 | KIIFFLSFHIQISIANPRE  | Negative |
| Q8GTB6 | VCKIIFFLSFHIQISIANP  | Negative |
| Q8GTB6 | NPRENFLKCFSKHIPNNVAN | Negative |
| Q8GTB6 | SFHIQISIANPRENFLKCFS | Negative |
| Q8GTB6 | IFFFLSFHIQISIANPRENF | Negative |
| Q8GTB6 | FFLSFHIQISIANPRENFLK | Negative |
| Q8GTB6 | MNCSAFSFWFVCKIIFFLS  | Negative |
| Q8GTB6 | FHIQISIANPRENFLKCFSK | Negative |
| Q8GTB6 | WVCKIIFFLSFHIQISIA   | Negative |
| Q8GTB6 | FLSFHIQISIANPRENFLKC | Negative |
| Q8GTB6 | FWFVCKIIFFLSFHIQISI  | Negative |
| Q8GTB6 | ANPRENFLKCFSKHIPNNVA | Negative |
| Q8GTB6 | QISIANPRENFLKCFSKHIP | Negative |
| Q8GTB6 | IANPRENFLKCFSKHIPNNV | Negative |
| Q8GTB6 | PRENFLKCFSKHIPNNVANP | Negative |
| Q8GTB6 | LSFHIQISIANPRENFLKCF | Negative |
| Q8GTB6 | SFWFVCKIIFFLSFHIQIS  | Negative |
| Q8GTB6 | FFFLSFHIQISIANPRENFL | Negative |
| Q8GTB6 | CSAFSFWFVCKIIFFLSFH  | Negative |
| Q8GTB6 | NCSAFSFWFVCKIIFFLSF  | Negative |
| Q8GTB6 | HIQISIANPRENFLKCFSKH | Negative |
| Q8GTB6 | CKIIFFLSFHIQISIANPR  | Negative |
| Q8GTB6 | ISIANPRENFLKCFSKHIPN | Negative |
| Q8GTM0 | VAYEVQARECKTESNTFPGI | Negative |
| Q8GTM0 | YEVQARECKTESNTFPGICI | Negative |
| Q8GTM0 | QARECKTESNTFPGICITKP | Negative |
| Q8GTM0 | SLCFMAFAILAMMLFVAYEV | Negative |
| Q8GTM0 | KTESNTFPGICITKPPCRKA | Negative |
| Q8GTM0 | ILAMMLFVAYEVQARECKTE | Negative |
| Q8GTM0 | RECKTESNTFPGICITKPPC | Negative |
| Q8GTM0 | AMMLFVAYEVQARECKTESN | Negative |
| Q8GTM0 | MARSLCFMAFAILAMMLFVA | Negative |
| Q8GTM0 | ECKTESNTFPGICITKPPCR | Negative |
| Q8GTM0 | VQARECKTESNTFPGICITK | Negative |
| Q8GTM0 | EVQARECKTESNTFPGICIT | Negative |
| Q8GTM0 | AYEVQARECKTESNTFPGIC | Negative |
| Q8GTM0 | LAMMLFVAYEVQARECKTES | Negative |
| Q8GTM0 | RSLCFMAFAILAMMLFVAYE | Negative |
| Q8GTM0 | CKTESNTFPGICITKPPCRK | Negative |
| Q8GTM0 | MAFAILAMMLFVAYEVQARE | Negative |
| Q8GTM0 | LCFMAFAILAMMLFVAYEVQ | Negative |
| Q8GTM0 | CFMAFAILAMMLFVAYEVQA | Negative |
| Q8GTM0 | FVAYEVQARECKTESNTFPG | Negative |
| Q8GTM0 | MLFVAYEVQARECKTESNTF | Negative |
| Q8GTM0 | ARECKTESNTFPGICITKPP | Negative |

|        |                       |          |
|--------|-----------------------|----------|
| Q8GTM0 | TESNTFPGICITKPPCRKAC  | Negative |
| Q8GTM0 | FAILAMMLFVAYEVQARECK  | Negative |
| Q8GTM0 | FMAFAILAMMLFVAYEVQAR  | Negative |
| Q8GTM0 | AFAILAMMLFVAYEVQAREC  | Negative |
| Q8GTM0 | ARSLCFMAFAILAMMLFVAY  | Negative |
| Q8GTM0 | LFVAYEVQARECKTESNTFP  | Negative |
| Q8GTM0 | MMLFVAYEVQARECKTESNT  | Negative |
| Q8H6Q0 | ICFFAVAILALMLFAAYETE  | Negative |
| Q8H6Q0 | FAVAILALMLFAAYETEAGT  | Negative |
| Q8H6Q0 | AECPTWEGICINKAPCVKCC  | Negative |
| Q8H6Q0 | AVAILALMLFAAYETEAGTC  | Negative |
| Q8H6Q0 | AAYTEAGTCKAECPTWEGI   | Negative |
| Q8H6Q0 | KAECPTWEGICINKAPCVKC  | Negative |
| Q8H6Q0 | ALMLFAAYETEAGTCKAECPT | Negative |
| Q8H6Q0 | AGTCKAECPTWEGICINKAP  | Negative |
| Q8H6Q0 | LMLFAAYETEAGTCKAECPT  | Negative |
| Q8H6Q0 | GTCKAECPTWEGICINKAPC  | Negative |
| Q8H6Q0 | TCKAECPTWEGICINKAPCV  | Negative |
| Q8H6Q0 | ARSICFFAVAILALMLFAAY  | Negative |
| Q8H6Q0 | FFAVAILALMLFAAYETEAG  | Negative |
| Q8H6Q0 | ETEAGTCKAECPTWEGICIN  | Negative |
| Q8H6Q0 | AYETEAGTCKAECPTWEGIC  | Negative |
| Q8H6Q0 | YETEAGTCKAECPTWEGICI  | Negative |
| Q8H6Q0 | LFAAYETEAGTCKAECPTWE  | Negative |
| Q8H6Q0 | CFFAVAILALMLFAAYETEA  | Negative |
| Q8H6Q0 | EAGTCKAECPTWEGICINKA  | Negative |
| Q8H6Q0 | ILALMLFAAYETEAGTCKAE  | Negative |
| Q8H6Q0 | MLFAAYETEAGTCKAECPTW  | Negative |
| Q8H6Q0 | CKAECPTWEGICINKAPCVK  | Negative |
| Q8H6Q0 | FAAYETEAGTCKAECPTWEG  | Negative |
| Q8H6Q0 | TEAGTCKAECPTWEGICINK  | Negative |
| Q8H6Q0 | MARSICFFAVAILALMLFAA  | Negative |
| Q8H6Q0 | LALMLFAAYETEAGTCKAEC  | Negative |
| Q8H6Q0 | RSICFFAVAILALMLFAAYE  | Negative |
| Q8H6Q0 | SICFFAVAILALMLFAAYET  | Negative |
| Q8H6Q0 | VAILALMLFAAYETEAGTCK  | Negative |
| Q8H6Q1 | AATCKAECPTWDSVCINKKP  | Negative |
| Q8H6Q1 | AAYDAEAATCKAECPTWDSV  | Negative |
| Q8H6Q1 | LFAAYDAEAATCKAECPTWD  | Negative |
| Q8H6Q1 | RSICFFAVAILALMLFAAYD  | Negative |
| Q8H6Q1 | EAATCKAECPTWDSVCINKK  | Negative |
| Q8H6Q1 | CFFAVAILALMLFAAYDAEA  | Negative |
| Q8H6Q1 | YDAEAATCKAECPTWDSVCI  | Negative |
| Q8H6Q1 | AECPTWDSVCINKKPCVACC  | Negative |
| Q8H6Q1 | FAAYDAEAATCKAECPTWDS  | Negative |
| Q8H6Q1 | TCKAECPTWDSVCINKKPCV  | Negative |

|        |                       |          |
|--------|-----------------------|----------|
| Q8H6Q1 | FAVAILALMLFAAYDAEAAT  | Negative |
| Q8H6Q1 | LMLFAAYDAEAATCKAECPT  | Negative |
| Q8H6Q1 | AEAATCKAECPTWDSVCINK  | Negative |
| Q8H6Q1 | VAILALMLFAAYDAEAATCK  | Negative |
| Q8H6Q1 | LALMLFAAYDAEAATCKAEC  | Negative |
| Q8H6Q1 | KAECPTWDSVCINKKPCVAC  | Negative |
| Q8H6Q1 | MLFAAYDAEAATCKAECPTW  | Negative |
| Q8H6Q1 | MARSICFFAVAILALMLFAA  | Negative |
| Q8H6Q1 | SICFFAVAILALMLFAAYDA  | Negative |
| Q8H6Q1 | ILALMLFAAYDAEAATCKAE  | Negative |
| Q8H6Q1 | DAEAATCKAECPTWDSVCIN  | Negative |
| Q8H6Q1 | ALMLFAAYDAEAATCKAECPT | Negative |
| Q8H6Q1 | AVAILALMLFAAYDAEAATC  | Negative |
| Q8H6Q1 | AYDAEAATCKAECPTWDSVC  | Negative |
| Q8H6Q1 | FFAVAILALMLFAAYDAEAA  | Negative |
| Q8H6Q1 | ICFFAVAILALMLFAAYDAE  | Negative |
| Q8H6Q1 | ARSICFFAVAILALMLFAAY  | Negative |
| Q8H6Q1 | CKAECPTWDSVCINKKPCVA  | Negative |
| Q8H6Q1 | ATCKAECPTWDSVCINKKPC  | Negative |
| Q8HY17 | WVLAGELWLRTEARASPYGV  | Negative |
| Q8HY17 | LWLRTEARASPYGVKLCGRE  | Negative |
| Q8HY17 | EARASPYGVKLCGREFIRAV  | Negative |
| Q8HY17 | ELWLRTEARASPYGVKLCGR  | Negative |
| Q8HY17 | AKRPLLLLLLAVWVLAGELW  | Negative |
| Q8HY17 | ARASPYGVKLCGREFIRAVI  | Negative |
| Q8HY17 | RPLLLLLLAVWVLAGELWLR  | Negative |
| Q8HY17 | SPYGVKLCGREFIRAVIFTC  | Negative |
| Q8HY17 | MAKRPLLLLLLAVWVLAGEL  | Negative |
| Q8HY17 | WLRTEARASPYGVKLCGREF  | Negative |
| Q8HY17 | RTEARASPYGVKLCGREFIR  | Negative |
| Q8HY17 | ASPYGVKLCGREFIRAVIFT  | Negative |
| Q8HY17 | LLAVWVLAGELWLRTEARAS  | Negative |
| Q8HY17 | RASPYGVKLCGREFIRAVIF  | Negative |
| Q8HY17 | PYGVKLCGREFIRAVIFTCG  | Negative |
| Q8HY17 | AGELWLRTEARASPYGVKLC  | Negative |
| Q8HY17 | PLLLLLLAVWVLAGELWLRT  | Negative |
| Q8HY17 | LLAVWVLAGELWLRTEARA   | Negative |
| Q8HY17 | VLAGELWLRTEARASPYGVK  | Negative |
| Q8HY17 | LRTEARASPYGVKLCGREFI  | Negative |
| Q8HY17 | LAGELWLRTEARASPYGVKL  | Negative |
| Q8HY17 | LAVWVLAGELWLRTEARASP  | Negative |
| Q8HY17 | TEARASPYGVKLCGREFIRA  | Negative |
| Q8HY17 | LLLLAVWVLAGELWLRTEAR  | Negative |
| Q8HY17 | KRPLLLLLLAVWVLAGELWL  | Negative |
| Q8HY17 | GELWLRTEARASPYGVKLCG  | Negative |
| Q8HY17 | LLLLLAVWVLAGELWLRTE   | Negative |

|        |                       |          |
|--------|-----------------------|----------|
| Q8HY17 | LLLLLAVWVLAGELWLRTEA  | Negative |
| Q8HY17 | VWVLAGELWLRTEARASPYG  | Negative |
| Q8I034 | MSGMWVHPGRTLIALWVLA   | Negative |
| Q8I034 | WVLA AVIKGPAADAPVRSTR | Negative |
| Q8I034 | AADAPVRSTR LGWVRGKQTT | Negative |
| Q8I034 | AVIKGPAADAPVRSTR LGWV | Negative |
| Q8I034 | APVRSTR LGWVRGKQTTVLG | Negative |
| Q8I034 | ALWVLA AVIKGPAADAPVRS | Negative |
| Q8I034 | VHPGRTLIALWVLA AVIKG  | Negative |
| Q8I034 | VIKGPAADAPVRSTR LGWVR | Negative |
| Q8I034 | PAADAPVRSTR LGWVRGKQT | Negative |
| Q8I034 | GPAADAPVRSTR LGWVRGKQ | Negative |
| Q8I034 | HPGRTLIALWVLA AVIKGP  | Negative |
| Q8I034 | LAAVIKGPAADAPVRSTR LG | Negative |
| Q8I034 | ADAPVRSTR LGWVRGKQTTV | Negative |
| Q8I034 | LIWALWVLA AVIKGPAADAP | Negative |
| Q8I034 | IWALWVLA AVIKGPAADAPV | Negative |
| Q8I034 | KGPAADAPVRSTR LGWVRGK | Negative |
| Q8I034 | GMWVHPGRTLIALWVLA AV  | Negative |
| Q8I034 | PGRTLIALWVLA AVIKGPA  | Negative |
| Q8I034 | GRTLIALWVLA AVIKGPAA  | Negative |
| Q8I034 | WVHPGRTLIALWVLA AVIK  | Negative |
| Q8I034 | IKGPAADAPVRSTR LGWVRG | Negative |
| Q8I034 | VLA AVIKGPAADAPVRSTR  | Negative |
| Q8I034 | DAPVRSTR LGWVRGKQTTVL | Negative |
| Q8I034 | AAVIKGPAADAPVRSTR LGW | Negative |
| Q8I034 | SGMWVHPGRTLIALWVLA A  | Negative |
| Q8I034 | TLIALWVLA AVIKGPAADA  | Negative |
| Q8I034 | LWVLA AVIKGPAADAPVRST | Negative |
| Q8I034 | MWVHPGRTLIALWVLA AVI  | Negative |
| Q8I034 | RTLIALWVLA AVIKGPAAD  | Negative |
| Q8I0L5 | LLICSMKFGNCQVETNVKC   | Negative |
| Q8I0L5 | SMSKFGNCQVETNVKCQGG   | Negative |
| Q8I0L5 | FSSIILLTLLICSMKFGNC   | Negative |
| Q8I0L5 | KFSSIILLTLLICSMKFGN   | Negative |
| Q8I0L5 | CSMSKFGNCQVETNVKCQGG  | Negative |
| Q8I0L5 | VETNVKCQGGSCASVCRKAI  | Negative |
| Q8I0L5 | CQGGSCASVCRKAIGVAAGK  | Negative |
| Q8I0L5 | ICSMKFGNCQVETNVKCQG   | Negative |
| Q8I0L5 | TLLICSMKFGNCQVETNVK   | Negative |
| Q8I0L5 | SKFGNCQVETNVKCQGGSCA  | Negative |
| Q8I0L5 | CQVETNVKCQGGSCASVCRK  | Negative |
| Q8I0L5 | SSIILLTLLICSMKFGNCQ   | Negative |
| Q8I0L5 | KFGNCQVETNVKCQGGSCAS  | Negative |
| Q8I0L5 | FGNCQVETNVKCQGGSCASV  | Negative |
| Q8I0L5 | NCQVETNVKCQGGSCASVCR  | Negative |

|        |                      |          |
|--------|----------------------|----------|
| Q8I0L5 | ETNVKCQGGSCASVCRKAIG | Negative |
| Q8I0L5 | TNVKCQGGSCASVCRKAIGV | Negative |
| Q8I0L5 | ILLTLICSMKFGNCQVET   | Negative |
| Q8I0L5 | QVETNVKCQGGSCASVCRKA | Negative |
| Q8I0L5 | MKFSSIILLTLICSMKFG   | Negative |
| Q8I0L5 | LICSMKFGNCQVETNVKCQ  | Negative |
| Q8I0L5 | SIILLTLICSMKFGNCQV   | Negative |
| Q8I0L5 | GNCQVETNVKCQGGSCASVC | Negative |
| Q8I0L5 | MSKFGNCQVETNVKCQGGSC | Negative |
| Q8I0L5 | VKCQGGSCASVCRKAIGVAA | Negative |
| Q8I0L5 | KCQGGSCASVCRKAIGVAAG | Negative |
| Q8I0L5 | NVKCQGGSCASVCRKAIGVA | Negative |
| Q8I0L5 | IILLTLICSMKFGNCQVE   | Negative |
| Q8I0L5 | LTLICSMKFGNCQVETNV   | Negative |
| Q8I7X1 | DVICADIRFTVHCICNELGL | Negative |
| Q8I7X1 | MKGLLFIVSLLCLTLHQRVW | Negative |
| Q8I7X1 | SDVICADIRFTVHCICNELG | Negative |
| Q8I7X1 | HQRVWAYQVIGMKSDVICAD | Negative |
| Q8I7X1 | VSLLCLTLHQRVWAYQVIGM | Negative |
| Q8I7X1 | SLLCLTLHQRVWAYQVIGMK | Negative |
| Q8I7X1 | IGMKSDVICADIRFTVHCIC | Negative |
| Q8I7X1 | LFIVSLLCLTLHQRVWAYQV | Negative |
| Q8I7X1 | LLCLTLHQRVWAYQVIGMKS | Negative |
| Q8I7X1 | LCLTLHQRVWAYQVIGMKSD | Negative |
| Q8I7X1 | QRVWAYQVIGMKSDVICADI | Negative |
| Q8I7X1 | GMKSDVICADIRFTVHCICN | Negative |
| Q8I7X1 | LHQRVWAYQVIGMKSDVICA | Negative |
| Q8I7X1 | CLTLHQRVWAYQVIGMKSDV | Negative |
| Q8I7X1 | KSDVICADIRFTVHCICNEL | Negative |
| Q8I7X1 | TLHQRVWAYQVIGMKSDVIC | Negative |
| Q8I7X1 | FIVSLLCLTLHQRVWAYQVI | Negative |
| Q8I7X1 | GLLFIVSLLCLTLHQRVWAY | Negative |
| Q8I7X1 | WAYQVIGMKSDVICADIRFT | Negative |
| Q8I7X1 | LLFIVSLLCLTLHQRVWAYQ | Negative |
| Q8I7X1 | RVWAYQVIGMKSDVICADIR | Negative |
| Q8I7X1 | VIGMKSDVICADIRFTVHCI | Negative |
| Q8I7X1 | LTLHQRVWAYQVIGMKSDVI | Negative |
| Q8I7X1 | KGLLFIVSLLCLTLHQRVWA | Negative |
| Q8I7X1 | YQVIGMKSDVICADIRFTVH | Negative |
| Q8I7X1 | MKSDVICADIRFTVHCICNE | Negative |
| Q8I7X1 | AYQVIGMKSDVICADIRFTV | Negative |
| Q8I7X1 | QVIGMKSDVICADIRFTVHC | Negative |
| Q8I7X1 | VWAYQVIGMKSDVICADIRF | Negative |
| Q8I817 | AVQSTGSQGCPTYVSEKCTA | Negative |
| Q8I817 | GCPTYVSEKCTARLQECSNN | Negative |
| Q8I817 | LLTCLVAAVQSTGSQGCPT  | Negative |

|        |                         |          |
|--------|-------------------------|----------|
| Q8I817 | LLTCLVAAVQSTGSQGCPTY    | Negative |
| Q8I817 | GSQGCPTYVSEKCTARLQEC    | Negative |
| Q8I817 | PLLLLTCLVAAVQSTGSQGC    | Negative |
| Q8I817 | LVAAVQSTGSQGCPTYVSEK    | Negative |
| Q8I817 | STGSQGCPTYVSEKCTARLQ    | Negative |
| Q8I817 | YVSEKCTARLQECSNNQQQE    | Negative |
| Q8I817 | ALPLLLLTCLVAAVQSTGSQ    | Negative |
| Q8I817 | TALPLLLLTCLVAAVQSTGS    | Negative |
| Q8I817 | CLVAAVQSTGSQGCPTYVSE    | Negative |
| Q8I817 | VAAVQSTGSQGCPTYVSEKC    | Negative |
| Q8I817 | VQSTGSQGCPTYVSEKCTAR    | Negative |
| Q8I817 | MKTALPLLLLTCLVAAVQST    | Negative |
| Q8I817 | QSTGSQGCPTYVSEKCTARL    | Negative |
| Q8I817 | SQGCPTYVSEKCTARLQEC     | Negative |
| Q8I817 | SEKCTARLQECSNNQQQEPL    | Negative |
| Q8I817 | LTCLVAAVQSTGSQGCPTYV    | Negative |
| Q8I817 | LLLLTCLVAAVQSTGSQGCP    | Negative |
| Q8I817 | PTYVSEKCTARLQECSNNQQ    | Negative |
| Q8I817 | QGCPTYVSEKCTARLQECSN    | Negative |
| Q8I817 | KTALPLLLLTCLVAAVQSTG    | Negative |
| Q8I817 | VSEKCTARLQECSNNQQQEP    | Negative |
| Q8I817 | TYVSEKCTARLQECSNNQQQ    | Negative |
| Q8I817 | TGSQGCPTYVSEKCTARLQE    | Negative |
| Q8I817 | CPTYVSEKCTARLQECSNNQ    | Negative |
| Q8I817 | AAVQSTGSQGCPTYVSEKCT    | Negative |
| Q8I817 | TCLVAAVQSTGSQGCPTYVS    | Negative |
| Q8IFJ8 | LAMCLLVAVGADKCPRATDQ    | Negative |
| Q8IFJ8 | VGADKCPRATDQEAQKQKRM    | Negative |
| Q8IFJ8 | GADKCPRATDQEAQKQKRMLE   | Negative |
| Q8IFJ8 | KCPRATDQEAQKQKRMLEVLQ   | Negative |
| Q8IFJ8 | AKWCVLAMCLLVAVGADKCP    | Negative |
| Q8IFJ8 | TDQEAQKQKRMLEVLQHV NKP  | Negative |
| Q8IFJ8 | ADKCPRATDQEAQKQKRMLEV   | Negative |
| Q8IFJ8 | ATDQEAQKQKRMLEVLQHV N   | Negative |
| Q8IFJ8 | CVLAMCLLVAVGADKCPRAT    | Negative |
| Q8IFJ8 | DKCPRATDQEAQKQKRMLEVL   | Negative |
| Q8IFJ8 | PRATDQEAQKQKRMLEVLQHV   | Negative |
| Q8IFJ8 | QEAQKQKRMLEVLQHV NKP YV | Negative |
| Q8IFJ8 | LVAVGADKCPRATDQEAQKQ    | Negative |
| Q8IFJ8 | WCVLAMCLLVAVGADKCPRA    | Negative |
| Q8IFJ8 | AKQKRMLEVLQHV NKP YVAE  | Negative |
| Q8IFJ8 | MCLLVAVGADKCPRATDQEA    | Negative |
| Q8IFJ8 | MVAKWCVLAMCLLVAVGADK    | Negative |
| Q8IFJ8 | DQEAQKQKRMLEVLQHV NKP Y | Negative |
| Q8IFJ8 | KQKRMLEVLQHV NKP YVAET  | Negative |
| Q8IFJ8 | AMCLLVAVGADKCPRATDQE    | Negative |



|        |                       |          |
|--------|-----------------------|----------|
| Q8IFJ8 | RATDQEAKQKRMLEVLQHVN  | Negative |
| Q8IFJ8 | VLAMCLLVAVGADKCPRATD  | Negative |
| Q8IFJ8 | CLLVAVGADKCPRATDQEAK  | Negative |
| Q8IFJ8 | VAVGADKCPRATDQEAKQKR  | Negative |
| Q8IFJ8 | VAKWCVLAMCLLVAVGADKC  | Negative |
| Q8IFJ8 | CPRATDQEAKQKRMLEVLQH  | Negative |
| Q8IFJ8 | LLVAVGADKCPRATDQEAKQ  | Negative |
| Q8IFJ8 | AVGADKCPRATDQEAKQKRM  | Negative |
| Q8IFJ8 | EAKQKRMLEVLQHVNKPYYA  | Negative |
| Q8J0D2 | TALSILASLAVAKEHYEFKN  | Negative |
| Q8J0D2 | YEFKNVAIGGGGYITGIVAH  | Negative |
| Q8J0D2 | HYEFKNVAIGGGGYITGIVA  | Negative |
| Q8J0D2 | MVAVTSLGKALTALSILASL  | Negative |
| Q8J0D2 | KNVAIGGGGYITGIVAHPKT  | Negative |
| Q8J0D2 | AVAKEHYEFKNVAIGGGGYI  | Negative |
| Q8J0D2 | ALTALSILASLAVAKEHYEF  | Negative |
| Q8J0D2 | KEHYEFKNVAIGGGGYITGI  | Negative |
| Q8J0D2 | VTSLGKALTALSILASLAVA  | Negative |
| Q8J0D2 | SILASLAVAKEHYEFKNVAI  | Negative |
| Q8J0D2 | TSLGKALTALSILASLAVAK  | Negative |
| Q8J0D2 | GKALTALSILASLAVAKEHY  | Negative |
| Q8J0D2 | SLGKALTALSILASLAVAKE  | Negative |
| Q8J0D2 | AVTSLGKALTALSILASLAV  | Negative |
| Q8J0D2 | EHYEFKNVAIGGGGYITGIV  | Negative |
| Q8J0D2 | VAVTSLGKALTALSILASLA  | Negative |
| Q8J0D2 | LAVAKEHYEFKNVAIGGGGY  | Negative |
| Q8J0D2 | LSILASLAVAKEHYEFKNVA  | Negative |
| Q8J0D2 | SLAVAKEHYEFKNVAIGGGG  | Negative |
| Q8J0D2 | AKEHYEFKNVAIGGGGYITG  | Negative |
| Q8J0D2 | ALSILASLAVAKEHYEFKNV  | Negative |
| Q8J0D2 | FKNVAIGGGGYITGIVAHPK  | Negative |
| Q8J0D2 | LASLAVAKEHYEFKNVAIGG  | Negative |
| Q8J0D2 | ILASLAVAKEHYEFKNVAIG  | Negative |
| Q8J0D2 | LTALSILASLAVAKEHYEFK  | Negative |
| Q8J0D2 | VAKEHYEFKNVAIGGGGYIT  | Negative |
| Q8J0D2 | EFKNVAIGGGGYITGIVAHP  | Negative |
| Q8J0D2 | ASLAVAKEHYEFKNVAIGGG  | Negative |
| Q8J0D2 | LGKALTALSILASLAVAKEH  | Negative |
| Q8J0I9 | ASMLGQAAISVAMPSEPAHS  | Negative |
| Q8J0I9 | YALIASMLGQAAISVAMPSE  | Negative |
| Q8J0I9 | AMPSEPAHSPRAAGAQAAYAS | Negative |
| Q8J0I9 | MRYALIASMLGQAAISVAMP  | Negative |
| Q8J0I9 | HSPRAAGAQAAYASNQAGNYK | Negative |
| Q8J0I9 | ISVAMPSEPAHSPRAAGAQA  | Negative |
| Q8J0I9 | RAAGAQAAYASNQAGNYKLTS | Negative |
| Q8J0I9 | SPRAAGAQAAYASNQAGNYKL | Negative |

|        |                       |          |
|--------|-----------------------|----------|
| Q8J0I9 | GQAAISVAMPSEPAHSPRAA  | Negative |
| Q8J0I9 | QAAISVAMPSEPAHSPRAAG  | Negative |
| Q8J0I9 | PRAAGAQAAYASNQAGNYKLT | Negative |
| Q8J0I9 | RYALIASMLGQAAISVAMPS  | Negative |
| Q8J0I9 | ALIASMLGQAAISVAMPSEP  | Negative |
| Q8J0I9 | SVAMPSEPAHSPRAAGAQAAY | Negative |
| Q8J0I9 | MPSEPAHSPRAAGAQAAYASN | Negative |
| Q8J0I9 | LGQAAISVAMPSEPAHSPRA  | Negative |
| Q8J0I9 | PAHSPRAAGAQAAYASNQAGN | Negative |
| Q8J0I9 | AHSPRAAGAQAAYASNQAGNY | Negative |
| Q8J0I9 | AGAQAAYASNQAGNYKLTSIA | Negative |
| Q8J0I9 | SMLGQAAISVAMPSEPAHSP  | Negative |
| Q8J0I9 | MLGQAAISVAMPSEPAHSPR  | Negative |
| Q8J0I9 | PSEPAHSPRAAGAQAAYASNQ | Negative |
| Q8J0I9 | VAMPSEPAHSPRAAGAQAAYA | Negative |
| Q8J0I9 | AAGAQAAYASNQAGNYKLTSI | Negative |
| Q8J0I9 | LIASMLGQAAISVAMPSEPA  | Negative |
| Q8J0I9 | SEPAHSPRAAGAQAAYASNQA | Negative |
| Q8J0I9 | IASMLGQAAISVAMPSEPAH  | Negative |
| Q8J0I9 | EPAHSPRAAGAQAAYASNQAG | Negative |
| Q8J0I9 | AAISVAMPSEPAHSPRAAGA  | Negative |
| Q8J0K5 | SSILLSALIAGGALALPAAE  | Negative |
| Q8J0K5 | LIAGGALALPAAEPVSFDIR  | Negative |
| Q8J0K5 | ISSILLSALIAGGALALPAA  | Negative |
| Q8J0K5 | PAAEPVSFDIRDENITLARR  | Negative |
| Q8J0K5 | IRDENITLARRAEAINYNQD  | Negative |
| Q8J0K5 | RDENITLARRAEAINYNQDY  | Negative |
| Q8J0K5 | GALALPAAEPVSFDIRDENI  | Negative |
| Q8J0K5 | ILLSALIAGGALALPAAEPV  | Negative |
| Q8J0K5 | LSALIAGGALALPAAEPVSF  | Negative |
| Q8J0K5 | AEPVSFDIRDENITLARRAE  | Negative |
| Q8J0K5 | EPVSFDIRDENITLARRAEA  | Negative |
| Q8J0K5 | LALPAAEPVSFDIRDENITL  | Negative |
| Q8J0K5 | AAEPVSFDIRDENITLARRA  | Negative |
| Q8J0K5 | ALIAGGALALPAAEPVSFDI  | Negative |
| Q8J0K5 | MGISSILLSALIAGGALALP  | Negative |
| Q8J0K5 | SFDIRDENITLARRAEAINY  | Negative |
| Q8J0K5 | AGGALALPAAEPVSFDIRDE  | Negative |
| Q8J0K5 | GGALALPAAEPVSFDIRDEN  | Negative |
| Q8J0K5 | LPAAEPVSFDIRDENITLAR  | Negative |
| Q8J0K5 | IAGGALALPAAEPVSFDIRD  | Negative |
| Q8J0K5 | LLSALIAGGALALPAAEPVS  | Negative |
| Q8J0K5 | ALALPAAEPVSFDIRDENIT  | Negative |
| Q8J0K5 | GISSILLSALIAGGALALPA  | Negative |
| Q8J0K5 | ALPAAEPVSFDIRDENITLA  | Negative |
| Q8J0K5 | DIRDENITLARRAEAINYNQ  | Negative |

|        |                       |          |
|--------|-----------------------|----------|
| Q8J0K5 | SILLSALIAGGALALPAAEP  | Negative |
| Q8J0K5 | SALIAGGALALPAAEPVSFD  | Negative |
| Q8J0K5 | FDIRDENITLARRAEAINYN  | Negative |
| Q8J0K5 | PVSFDIRDENITLARRAEAI  | Negative |
| Q8JFY4 | WMDSVQAGSSFLSPSQRPQG  | Negative |
| Q8JFY4 | IILLVCVLALWMDSVQAGSS  | Negative |
| Q8JFY4 | VLALWMDSVQAGSSFLSPSQ  | Negative |
| Q8JFY4 | CVLALWMDSVQAGSSFLSPS  | Negative |
| Q8JFY4 | SSFLSPSQRPQGGKDKKPPRV | Negative |
| Q8JFY4 | MRQMKRTAYIILLVCVLALW  | Negative |
| Q8JFY4 | MKRTAYIILLVCVLALWMDS  | Negative |
| Q8JFY4 | LVCVLALWMDSVQAGSSFLS  | Negative |
| Q8JFY4 | SFLSPSQRPQGGKDKKPPRVG | Negative |
| Q8JFY4 | AYIILLVCVLALWMDSVQAG  | Negative |
| Q8JFY4 | RQMKRTAYIILLVCVLALWM  | Negative |
| Q8JFY4 | ILLVCVLALWMDSVQAGSSF  | Negative |
| Q8JFY4 | ALWMDSVQAGSSFLSPSQRP  | Negative |
| Q8JFY4 | RTAYIILLVCVLALWMDSVQ  | Negative |
| Q8JFY4 | VQAGSSFLSPSQRPQGGKDKK | Negative |
| Q8JFY4 | FLSPSQRPQGGKDKKPPRVGR | Negative |
| Q8JFY4 | SVQAGSSFLSPSQRPQGGKDK | Negative |
| Q8JFY4 | VCVLALWMDSVQAGSSFLSP  | Negative |
| Q8JFY4 | KRTAYIILLVCVLALWMDSV  | Negative |
| Q8JFY4 | QAGSSFLSPSQRPQGGKDKKP | Negative |
| Q8JFY4 | LWMDSVQAGSSFLSPSQRPQ  | Negative |
| Q8JFY4 | GSSFLSPSQRPQGGKDKKPPR | Negative |
| Q8JFY4 | YIILLVCVLALWMDSVQAGS  | Negative |
| Q8JFY4 | MDSVQAGSSFLSPSQRPQGGK | Negative |
| Q8JFY4 | TAYIILLVCVLALWMDSVQA  | Negative |
| Q8JFY4 | DSVQAGSSFLSPSQRPQGGKD | Negative |
| Q8JFY4 | AGSSFLSPSQRPQGGKDKKPP | Negative |
| Q8JFY4 | QMKRTAYIILLVCVLALWMD  | Negative |
| Q8JFY4 | LALWMDSVQAGSSFLSPSQR  | Negative |
| Q8JGT6 | GFCCPLGWSSYDEHCYQVFQ  | Negative |
| Q8JGT6 | IFVSFGLLVVFISLSGTEAG  | Negative |
| Q8JGT6 | AGFCCPLGWSSYDEHCYQVF  | Negative |
| Q8JGT6 | FCCPLGWSSYDEHCYQVFQQ  | Negative |
| Q8JGT6 | SFGLLVVFISLSGTEAGFCC  | Negative |
| Q8JGT6 | RFIFVSFGLLVVFISLSGTE  | Negative |
| Q8JGT6 | GRFIFVSFGLLVVFISLSGT  | Negative |
| Q8JGT6 | EAGFCCPLGWSSYDEHCYQV  | Negative |
| Q8JGT6 | VVFISLSGTEAGFCCPLGWS  | Negative |
| Q8JGT6 | MGRFIFVSFGLLVVFISLSG  | Negative |
| Q8JGT6 | FIFVSFGLLVVFISLSGTEA  | Negative |
| Q8JGT6 | GWSSYDEHCYQVFQQKMNWE  | Negative |
| Q8JGT6 | ISLSGTEAGFCCPLGWSSYD  | Negative |

|        |                       |          |
|--------|-----------------------|----------|
| Q8JGT6 | LLVVFISLSGTEAGFCCPLG  | Negative |
| Q8JGT6 | LVVFISLSGTEAGFCCPLGW  | Negative |
| Q8JGT6 | CCPLGWSSYDEHCYQVFQQK  | Negative |
| Q8JGT6 | SGTEAGFCCPLGWSSYDEHC  | Negative |
| Q8JGT6 | VSFGLLVVFISLSGTEAGFC  | Negative |
| Q8JGT6 | GLLVVFISLSGTEAGFCCPL  | Negative |
| Q8JGT6 | PLGWSSYDEHCYQVFQQKMN  | Negative |
| Q8JGT6 | SLSGTEAGFCCPLGWSSYDE  | Negative |
| Q8JGT6 | FISLSGTEAGFCCPLGWSSY  | Negative |
| Q8JGT6 | FVSFGLLVVFISLSGTEAGF  | Negative |
| Q8JGT6 | CPLGWSSYDEHCYQVFQQKM  | Negative |
| Q8JGT6 | GTEAGFCCPLGWSSYDEHCY  | Negative |
| Q8JGT6 | LGWSSYDEHCYQVFQQKMNW  | Negative |
| Q8JGT6 | LSGTEAGFCCPLGWSSYDEH  | Negative |
| Q8JGT6 | VFISLSGTEAGFCCPLGWSS  | Negative |
| Q8JGT6 | TEAGFCCPLGWSSYDEHCYQ  | Negative |
| Q8JGT9 | NSESPRNP GKQQEIVNIHNS | Negative |
| Q8JGT9 | FGNVDFNSESPRNP GKQQEI | Negative |
| Q8JGT9 | ILLSLAAVLRQSFGNVDFNS  | Negative |
| Q8JGT9 | AVLRQSFGNVDFNSESPRNP  | Negative |
| Q8JGT9 | LAAVLRQSFGNVDFNSESPR  | Negative |
| Q8JGT9 | SLAAVLRQSFGNVDFNSESP  | Negative |
| Q8JGT9 | SFGNVDFNSESPRNP GKQQE | Negative |
| Q8JGT9 | VLRQSFGNVDFNSESPRNP G | Negative |
| Q8JGT9 | SESPRNP GKQQEIVNIHNSF | Negative |
| Q8JGT9 | ESPRNP GKQQEIVNIHNSFR | Negative |
| Q8JGT9 | SPRNP GKQQEIVNIHNSFRR | Negative |
| Q8JGT9 | RNP GKQQEIVNIHNSFRRSV | Negative |
| Q8JGT9 | PGKQQEIVNIHNSFRRSVRP  | Negative |
| Q8JGT9 | RQSFGNVDFNSESPRNP GKQ | Negative |
| Q8JGT9 | QSFGNVDFNSESPRNP GKQQ | Negative |
| Q8JGT9 | VDFNSESPRNP GKQQEIVNI | Negative |
| Q8JGT9 | NPGKQQEIVNIHNSFRRSVR  | Negative |
| Q8JGT9 | IVFILLSLAAVLRQSFGNVD  | Negative |
| Q8JGT9 | LSLAAVLRQSFGNVDFNSE   | Negative |
| Q8JGT9 | FNSESPRNP GKQQEIVNIHN | Negative |
| Q8JGT9 | PRNP GKQQEIVNIHNSFRRS | Negative |
| Q8JGT9 | NVDFNSESPRNP GKQQEIVN | Negative |
| Q8JGT9 | AAVLRQSFGNVDFNSESPRN  | Negative |
| Q8JGT9 | LLSLAAVLRQSFGNVDFNSE  | Negative |
| Q8JGT9 | MIVFILLSLAAVLRQSFGNV  | Negative |
| Q8JGT9 | LRQSFGNVDFNSESPRNP GK | Negative |
| Q8JGT9 | GNVDFNSESPRNP GKQQEIV | Negative |
| Q8JGT9 | VFILLSLAAVLRQSFGNVDF  | Negative |
| Q8JGT9 | DFNSESPRNP GKQQEIVNIH | Negative |
| Q8JI39 | ESPRKPEIQNEIIDLHNSLR  | Negative |

|        |                      |          |
|--------|----------------------|----------|
| Q8JI39 | NVDFDSESPRKPEIQNEIID | Negative |
| Q8JI39 | SSGNVDFDSESPRKPEIQNE | Negative |
| Q8JI39 | PRKPEIQNEIIDLHNSLRRS | Negative |
| Q8JI39 | SGNVDFDSESPRKPEIQNEI | Negative |
| Q8JI39 | ILAAVLQQSSGNVDFDSESP | Negative |
| Q8JI39 | SESPRKPEIQNEIIDLHNSL | Negative |
| Q8JI39 | DFDSESPRKPEIQNEIIDLH | Negative |
| Q8JI39 | LQQSSGNVDFDSESPRKPEI | Negative |
| Q8JI39 | PILAAVLQQSSGNVDFDSES | Negative |
| Q8JI39 | IAFIVLPILAAVLQQSSGNV | Negative |
| Q8JI39 | LPILAAVLQQSSGNVDFDSE | Negative |
| Q8JI39 | QQSSGNVDFDSESPRKPEIQ | Negative |
| Q8JI39 | SPRKPEIQNEIIDLHNSLRR | Negative |
| Q8JI39 | KPEIQNEIIDLHNSLRRSVN | Negative |
| Q8JI39 | MIAFIVLPILAAVLQQSSGN | Negative |
| Q8JI39 | VDFDSESPRKPEIQNEIIDL | Negative |
| Q8JI39 | QSSGNVDFDSESPRKPEIQN | Negative |
| Q8JI39 | AVLQQSSGNVDFDSESPRKP | Negative |
| Q8JI39 | FIVLPILAAVLQQSSGNVDF | Negative |
| Q8JI39 | GNVDFDSESPRKPEIQNEII | Negative |
| Q8JI39 | LAAVLQQSSGNVDFDSESPR | Negative |
| Q8JI39 | VLQQSSGNVDFDSESPRKPE | Negative |
| Q8JI39 | RKPEIQNEIIDLHNSLRRSV | Negative |
| Q8JI39 | VLPIAAVLQQSSGNVDFDS  | Negative |
| Q8JI39 | AAVLQQSSGNVDFDSESPRK | Negative |
| Q8JI39 | FDSESPRKPEIQNEIIDLHN | Negative |
| Q8JI39 | AFIVLPILAAVLQQSSGNVD | Negative |
| Q8JI39 | DSESPRKPEIQNEIIDLHNS | Negative |
| Q8JIY9 | LLVGVEGHLWQFREMIKEAT | Negative |
| Q8JIY9 | LWQFREMIKEATGKEPLTTY | Negative |
| Q8JIY9 | TGKEPLTTYLFYACYCGWGG | Negative |
| Q8JIY9 | MRTLWIMAVLLVGVEGHLWQ | Negative |
| Q8JIY9 | EATGKEPLTTYLFYACYCGW | Negative |
| Q8JIY9 | AVLLVGVEGHLWQFREMIKE | Negative |
| Q8JIY9 | VGVEGHLWQFREMIKEATGK | Negative |
| Q8JIY9 | KEATGKEPLTTYLFYACYCG | Negative |
| Q8JIY9 | VEGHLWQFREMIKEATGKEP | Negative |
| Q8JIY9 | GKEPLTTYLFYACYCGWGGR | Negative |
| Q8JIY9 | TLWIMAVLLVGVEGHLWQFR | Negative |
| Q8JIY9 | MIKEATGKEPLTTYLFYACY | Negative |
| Q8JIY9 | EGHLWQFREMIKEATGKEPL | Negative |
| Q8JIY9 | FREMIKEATGKEPLTTYLFY | Negative |
| Q8JIY9 | IKEATGKEPLTTYLFYACYC | Negative |
| Q8JIY9 | REMIKEATGKEPLTTYLFYA | Negative |
| Q8JIY9 | LVGVEGHLWQFREMIKEATG | Negative |
| Q8JIY9 | LWIMAVLLVGVEGHLWQFRE | Negative |

|        |                      |          |
|--------|----------------------|----------|
| Q8JIY9 | GHLWQFREMIKEATGKEPLT | Negative |
| Q8JIY9 | QFREMIKEATGKEPLTTYLF | Negative |
| Q8JIY9 | WIMAVLLVGVEGHLWQFREM | Negative |
| Q8JIY9 | HLWQFREMIKEATGKEPLTT | Negative |
| Q8JIY9 | IMAVLLVGVEGHLWQFREMI | Negative |
| Q8JIY9 | GVEGHLWQFREMIKEATGKE | Negative |
| Q8JIY9 | VLLVGVEGHLWQFREMIKEA | Negative |
| Q8JIY9 | ATGKEPLTTYLFYACYCGWG | Negative |
| Q8JIY9 | EMIKEATGKEPLTTYLFYAC | Negative |
| Q8JIY9 | WQFREMIKEATGKEPLTTYL | Negative |
| Q8JIY9 | MAVLLVGVEGHLWQFREMIK | Negative |
| Q8K0D2 | LIALVGKSVIGLSLMSFIAP | Negative |
| Q8K0D2 | LMSFIAPDPDWTPDDYYYS  | Negative |
| Q8K0D2 | SVIGLSLMSFIAPDPDWTP  | Negative |
| Q8K0D2 | VFRVLLLIALVGKSVIGLSL | Negative |
| Q8K0D2 | VGKSVIGLSLMSFIAPDPD  | Negative |
| Q8K0D2 | VRMLVFRVLLLIALVGKSVI | Negative |
| Q8K0D2 | FVRMLVFRVLLLIALVGKSV | Negative |
| Q8K0D2 | LLLIALVGKSVIGLSLMSFI | Negative |
| Q8K0D2 | MFVRMLVFRVLLLIALVGKS | Negative |
| Q8K0D2 | LVFRVLLLIALVGKSVIGLS | Negative |
| Q8K0D2 | GKSVIGLSLMSFIAPDPDW  | Negative |
| Q8K0D2 | VLLLIALVGKSVIGLSLMSF | Negative |
| Q8K0D2 | MLVFRVLLLIALVGKSVIGL | Negative |
| Q8K0D2 | ALVGKSVIGLSLMSFIAPPD | Negative |
| Q8K0D2 | LLIALVGKSVIGLSLMSFIA | Negative |
| Q8K0D2 | GLSLMSFIAPDPDWTPDDY  | Negative |
| Q8K0D2 | IALVGKSVIGLSLMSFIAPP | Negative |
| Q8K0D2 | IAPDPDWTPDDYYYSYEQS  | Negative |
| Q8K0D2 | VIGLSLMSFIAPDPDWTPD  | Negative |
| Q8K0D2 | LSLMSFIAPDPDWTPDDYY  | Negative |
| Q8K0D2 | IGLSLMSFIAPDPDWTPDD  | Negative |
| Q8K0D2 | FIAPDPDWTPDDYYYSYEQ  | Negative |
| Q8K0D2 | MSFIAPDPDWTPDDYYYSY  | Negative |
| Q8K0D2 | LVGKSVIGLSLMSFIAPDP  | Negative |
| Q8K0D2 | SFIAPDPDWTPDDYYYSYE  | Negative |
| Q8K0D2 | KSVIGLSLMSFIAPDPDWTP | Negative |
| Q8K0D2 | SLMSFIAPDPDWTPDDYYY  | Negative |
| Q8K0D2 | RMLVFRVLLLIALVGKSVIG | Negative |
| Q8K0D2 | FRVLLLIALVGKSVIGLSLM | Negative |
| Q8KDM7 | TAMTAKPANAENVYQALVDA | Negative |
| Q8KDM7 | AEVNYQALVDADVKAQGF   | Negative |
| Q8KDM7 | KPANAENVYQALVDADVKA  | Negative |
| Q8KDM7 | TGALVLMTAMTAKPANAENV | Negative |
| Q8KDM7 | KKTIQRGLFTGALVLMTAMT | Negative |
| Q8KDM7 | AKPANAENVYQALVDADVKA | Negative |

|        |                       |          |
|--------|-----------------------|----------|
| Q8KDM7 | LFTGALVLMTAMTAKPANAE  | Negative |
| Q8KDM7 | MTAKPANAEVNYQALVDADV  | Negative |
| Q8KDM7 | LMTAMTAKPANAEVNYQALV  | Negative |
| Q8KDM7 | EVNYQALVDADVKAFFQFFR  | Negative |
| Q8KDM7 | FTGALVLMTAMTAKPANAEV  | Negative |
| Q8KDM7 | VLMTAMTAKPANAEVNYQAL  | Negative |
| Q8KDM7 | TIQRGLFTGALVLMTAMTAK  | Negative |
| Q8KDM7 | PANAEVNYQALVDADVKAFFQ | Negative |
| Q8KDM7 | QRGLFTGALVLMTAMTAKPA  | Negative |
| Q8KDM7 | KTIQRGLFTGALVLMTAMTA  | Negative |
| Q8KDM7 | IQRGLFTGALVLMTAMTAKP  | Negative |
| Q8KDM7 | MTAMTAKPANAEVNYQALVD  | Negative |
| Q8KDM7 | LVLMTAMTAKPANAEVNYQA  | Negative |
| Q8KDM7 | AMTAKPANAEVNYQALVDAD  | Negative |
| Q8KDM7 | RGLFTGALVLMTAMTAKPAN  | Negative |
| Q8KDM7 | GLFTGALVLMTAMTAKPANA  | Negative |
| Q8KDM7 | ANAEVNYQALVDADVKAFFQG | Negative |
| Q8KDM7 | MKKTIQRGLFTGALVLMTAM  | Negative |
| Q8KDM7 | GALVLMTAMTAKPANAEVNY  | Negative |
| Q8KDM7 | NAEVNYQALVDADVKAFFQGF | Negative |
| Q8KDM7 | VNYQALVDADVKAFFQFFRK  | Negative |
| Q8KDM7 | NYQALVDADVKAFFQFFRKE  | Negative |
| Q8KDM7 | TAKPANAEVNYQALVDADVKA | Negative |
| Q8KIL1 | AQFAPAGAGGEPSSSVPGPG  | Negative |
| Q8KIL1 | LALACSPLIAHAQFAPAGAG  | Negative |
| Q8KIL1 | ACSPLIAHAQFAPAGAGGEP  | Negative |
| Q8KIL1 | LLATAAGLALACSPLIAHAQ  | Negative |
| Q8KIL1 | RRPYLLATAAGLALACSPLI  | Negative |
| Q8KIL1 | AHAQFAPAGAGGEPSSSVPG  | Negative |
| Q8KIL1 | HAQFAPAGAGGEPSSSVPGP  | Negative |
| Q8KIL1 | AGLALACSPLIAHAQFAPAG  | Negative |
| Q8KIL1 | IAHAQFAPAGAGGEPSSSV   | Negative |
| Q8KIL1 | GAGGEPSSSVPGPGNASEPT  | Negative |
| Q8KIL1 | PAGAGGEPSSSVPGPGNASE  | Negative |
| Q8KIL1 | AAGLALACSPLIAHAQFAPA  | Negative |
| Q8KIL1 | ATAAGLALACSPLIAHAQFA  | Negative |
| Q8KIL1 | PYLLATAAGLALACSPLIAH  | Negative |
| Q8KIL1 | TAAGLALACSPLIAHAQFAP  | Negative |
| Q8KIL1 | LIAHAQFAPAGAGGEPSSSV  | Negative |
| Q8KIL1 | YLLATAAGLALACSPLIAHA  | Negative |
| Q8KIL1 | CSPLIAHAQFAPAGAGGEP   | Negative |
| Q8KIL1 | SPLIAHAQFAPAGAGGEPSS  | Negative |
| Q8KIL1 | MRRPYLLATAAGLALACSPL  | Negative |
| Q8KIL1 | ALACSPLIAHAQFAPAGAGG  | Negative |
| Q8KIL1 | RPYLLATAAGLALACSPLIA  | Negative |
| Q8KIL1 | QFAPAGAGGEPSSSVPGPGN  | Negative |

|        |                      |          |
|--------|----------------------|----------|
| Q8KIL1 | AGAGGEPSSSVPGPGNASEP | Negative |
| Q8KIL1 | GLALACSPLIAHAQFAPAGA | Negative |
| Q8KIL1 | FAPAGAGGEPSSSVPGPGNA | Negative |
| Q8KIL1 | PLIAHAQFAPAGAGGEPSSS | Negative |
| Q8KIL1 | LATAAGLALACSPLIAHAQF | Negative |
| Q8KIL1 | APAGAGGEPSSSVPGPGNAS | Negative |
| Q8L5C6 | TPTALAAGGKTGQVTVFWGR | Negative |
| Q8L5C6 | LLALLSVAAALFLTPTALAA | Negative |
| Q8L5C6 | AARRPACLLALLSVAAALFL | Negative |
| Q8L5C6 | SVAAALFLTPTALAAGGKTG | Negative |
| Q8L5C6 | RPACLLALLSVAAALFLTPT | Negative |
| Q8L5C6 | AAALFLTPTALAAGGKTGQV | Negative |
| Q8L5C6 | LALLSVAAALFLTPTALAAG | Negative |
| Q8L5C6 | LLSVAAALFLTPTALAAGGK | Negative |
| Q8L5C6 | ARRPACLLALLSVAAALFLT | Negative |
| Q8L5C6 | MAPLAARRPACLLALLSVAA | Negative |
| Q8L5C6 | PTALAAGGKTGQVTVFWGRN | Negative |
| Q8L5C6 | APLAARRPACLLALLSVAAA | Negative |
| Q8L5C6 | FLTPTALAAGGKTGQVTVFW | Negative |
| Q8L5C6 | LAARRPACLLALLSVAAALF | Negative |
| Q8L5C6 | ALLSVAAALFLTPTALAAGG | Negative |
| Q8L5C6 | VAAALFLTPTALAAGGKTGQ | Negative |
| Q8L5C6 | ALAAGGKTGQVTVFWGRNKA | Negative |
| Q8L5C6 | AAGGKTGQVTVFWGRNKAEG | Negative |
| Q8L5C6 | ACLLALLSVAAALFLTPTAL | Negative |
| Q8L5C6 | CLLALLSVAAALFLTPTALA | Negative |
| Q8L5C6 | LTPTALAAGGKTGQVTVFWG | Negative |
| Q8L5C6 | LAAGGKTGQVTVFWGRNKA  | Negative |
| Q8L5C6 | PACLLALLSVAAALFLTPTA | Negative |
| Q8L5C6 | TALAAGGKTGQVTVFWGRNK | Negative |
| Q8L5C6 | ALFLTPTALAAGGKTGQVTV | Negative |
| Q8L5C6 | LFLTPTALAAGGKTGQVTVF | Negative |
| Q8L5C6 | RRPACLLALLSVAAALFLTP | Negative |
| Q8L5C6 | AALFLTPTALAAGGKTGQVT | Negative |
| Q8L5C6 | PLAARRPACLLALLSVAAAL | Negative |
| Q8L5J1 | NEFSKPTRAFSNNNFVYTDG | Negative |
| Q8L5J1 | PNEFSKPTRAFSNNNFVYTD | Negative |
| Q8L5J1 | ILIFVAILIIFPNEFSKPTR | Negative |
| Q8L5J1 | TRAFSNNNFVYTDGTHFALN | Negative |
| Q8L5J1 | LIIFPNEFSKPTRAFSNNNF | Negative |
| Q8L5J1 | IFVAILIIFPNEFSKPTRAF | Negative |
| Q8L5J1 | FVAILIIFPNEFSKPTRAFS | Negative |
| Q8L5J1 | SIILIFVAILIIFPNEFSKP | Negative |
| Q8L5J1 | PTRAFSNNNFVYTDGTHFAL | Negative |
| Q8L5J1 | NNFVYTDGTHFALNGKSLYI | Negative |
| Q8L5J1 | FSKPTRAFSNNNFVYTDGTH | Negative |



|        |                       |          |
|--------|-----------------------|----------|
| Q8L5J1 | AILIIFPNEFSKPTRAFSNN  | Negative |
| Q8L5J1 | FPNEFSKPTRAFSNNNFVYT  | Negative |
| Q8L5J1 | AFSNNNFVYTDGTHFALNGK  | Negative |
| Q8L5J1 | SKPTRAFSNNNFVYTDGTHF  | Negative |
| Q8L5J1 | NSIILIFVAILIIFPNEFSK  | Negative |
| Q8L5J1 | VAILIIFPNEFSKPTRAFSN  | Negative |
| Q8L5J1 | NNSIILIFVAILIIFPNEFS  | Negative |
| Q8L5J1 | KPTRAFSNNNFVYTDGTHFA  | Negative |
| Q8L5J1 | SNNNFVYTDGTHFALNGKSL  | Negative |
| Q8L5J1 | LIFVAILIIFPNEFSKPTRA  | Negative |
| Q8L5J1 | NNNFVYTDGTHFALNGKSLY  | Negative |
| Q8L5J1 | FSNNNFVYTDGTHFALNGKS  | Negative |
| Q8L5J1 | RAFSNNNFVYTDGTHFALNG  | Negative |
| Q8L5J1 | IFPNEFSKPTRAFSNNNFVY  | Negative |
| Q8L5J1 | EFSKPTRAFSNNNFVYTDGT  | Negative |
| Q8L5J1 | IILIFVAILIIFPNEFSKPT  | Negative |
| Q8L5J1 | IIFPNEFSKPTRAFSNNNFV  | Negative |
| Q8L5J1 | MNNSIILIFVAILIIFPNEF  | Negative |
| Q8LG54 | KIIEAFFIVALFTTSCLAQA  | Negative |
| Q8LG54 | ALFTTSCLAQAPAPSPTTTV  | Negative |
| Q8LG54 | TSCLAQAPAPSPTTTVTPPP  | Negative |
| Q8LG54 | CLAQAPAPSPTTTVTPPPVA  | Negative |
| Q8LG54 | AFFIVALFTTSCLAQAPAPS  | Negative |
| Q8LG54 | MNSKIIEAFFIVALFTTSCL  | Negative |
| Q8LG54 | IEAFFIVALFTTSCLAQAPA  | Negative |
| Q8LG54 | QAPAPSPTTTVTPPPVATPP  | Negative |
| Q8LG54 | VALFTTSCLAQAPAPSPTTT  | Negative |
| Q8LG54 | LFTTSCLAQAPAPSPTTTVT  | Negative |
| Q8LG54 | PTTTVTPPPVATPPPAATPA  | Negative |
| Q8LG54 | IVALFTTSCLAQAPAPSPTT  | Negative |
| Q8LG54 | TTVTTPPPVATPPPAATPAPT | Negative |
| Q8LG54 | NSKIIEAFFIVALFTTSCLA  | Negative |
| Q8LG54 | TTSCLAQAPAPSPTTTVTPP  | Negative |
| Q8LG54 | IIEAFFIVALFTTSCLAQAP  | Negative |
| Q8LG54 | SKIIEAFFIVALFTTSCLAQ  | Negative |
| Q8LG54 | FFIVALFTTSCLAQAPAPSP  | Negative |
| Q8LG54 | FIVALFTTSCLAQAPAPSPT  | Negative |
| Q8LG54 | SPTTTVTTPPPVATPPPAATP | Negative |
| Q8LG54 | SCLAQAPAPSPTTTVTPPPV  | Negative |
| Q8LG54 | PAPSPTTTVTTPPPVATPPPA | Negative |
| Q8LG54 | FTTSCLAQAPAPSPTTTVTP  | Negative |
| Q8LG54 | PSPTTTVTTPPPVATPPPAAT | Negative |
| Q8LG54 | APAPSPTTTVTTPPPVATPPP | Negative |
| Q8LG54 | LAQAPAPSPTTTVTTPPPVAT | Negative |
| Q8LG54 | TTTVTPPPVATPPPAATPAP  | Negative |
| Q8LG54 | APSPTTTVTTPPPVATPPPAA | Negative |

|        |                             |          |
|--------|-----------------------------|----------|
| Q8LG54 | AQAPAPSPTTTVTPPP VATP       | Negative |
| Q8MI35 | ARGPGPGATARRRLLALLLL        | Negative |
| Q8MI35 | GARGPGPGATARRRLLALLLL       | Negative |
| Q8MI35 | RRL LALL LLL LLL LPLPARAW   | Negative |
| Q8MI35 | LLLLLPLPARAWYKHTASPR        | Negative |
| Q8MI35 | LLPLPARAWYKHTASPRYHT        | Negative |
| Q8MI35 | RRRL LALL LLL LLL LPLPARA   | Negative |
| Q8MI35 | LALL LLL LLL LPLPARAWYKH    | Negative |
| Q8MI35 | TARRRL LALL LLL LLL LPLPA   | Negative |
| Q8MI35 | LLL LPLPARAWYKHTASPRY       | Negative |
| Q8MI35 | LLLL LLL LPLPARAWYKHTAS     | Negative |
| Q8MI35 | GATARRRL LALL LLL LLL LPL   | Negative |
| Q8MI35 | ARRRL LALL LLL LLL LPLPAR   | Negative |
| Q8MI35 | PGATARRRL LALL LLL LLL LPL  | Negative |
| Q8MI35 | MGARGPGPGATARRRL LALL       | Negative |
| Q8MI35 | PLPARAWYKHTASPRYHTVG        | Negative |
| Q8MI35 | RGPGPGATARRRL LALL LLL      | Negative |
| Q8MI35 | LPLPARAWYKHTASPRYHTV        | Negative |
| Q8MI35 | PGPGATARRRL LALL LLL LLL    | Negative |
| Q8MI35 | LLL LPLPARAWYKHTASPRYH      | Negative |
| Q8MI35 | GPGATARRRL LALL LLL LLL LLL | Negative |
| Q8MI35 | ARAWYKHTASPRYHTVGR AA       | Negative |
| Q8MI35 | GPGPGATARRRL LALL LLL LLL   | Negative |
| Q8MI35 | RLLALL LLL LLL LPLPARAWY    | Negative |
| Q8MI35 | LLLL LLL LPLPARAWYKHTA      | Negative |
| Q8MI35 | ATARRRL LALL LLL LLL LPLP   | Negative |
| Q8MI35 | LPARAWYKHTASPRYHTVGR        | Negative |
| Q8MI35 | PARAWYKHTASPRYHTVGRA        | Negative |
| Q8MI35 | LLALL LLL LLL LPLPARAWYK    | Negative |
| Q8MI35 | LLLL LLL LPLPARAWYKHTASP    | Negative |
| Q8MJV4 | LLASPGLAWYKPTAGQGYYS        | Negative |
| Q8MJV4 | AAALALCLLLASPGLAWYKP        | Negative |
| Q8MJV4 | ALCLLLASPGLAWYKPTAGQ        | Negative |
| Q8MJV4 | ASPGLAWYKPTAGQGYYSVG        | Negative |
| Q8MJV4 | MAGPAMLVAAALALCLLLAS        | Negative |
| Q8MJV4 | VAAALALCLLLASPGLAWYK        | Negative |
| Q8MJV4 | GLAWYKPTAGQGYYSVGR AA       | Negative |
| Q8MJV4 | LVAAALALCLLLASPGLAWY        | Negative |
| Q8MJV4 | PAMLVAAALALCLLLASPGL        | Negative |
| Q8MJV4 | SPGLAWYKPTAGQGYYSVGR        | Negative |
| Q8MJV4 | YKPTAGQGYYSVGRAAGLLS        | Negative |
| Q8MJV4 | MLVAAALALCLLLASPGLAW        | Negative |
| Q8MJV4 | AGQGYYSVGRAAGLLSGFHR        | Negative |
| Q8MJV4 | LAWYKPTAGQGYYSVGRAAG        | Negative |
| Q8MJV4 | LCLLLASPGLAWYKPTAGQG        | Negative |
| Q8MJV4 | PGLAWYKPTAGQGYYSVGRA        | Negative |

|        |                      |          |
|--------|----------------------|----------|
| Q8MJV4 | WYKPTAGQGYYSVGRAAGLL | Negative |
| Q8MJV4 | KPTAGQGYYSVGRAAGLLSG | Negative |
| Q8MJV4 | AGPAMLVAAALALCLLLASP | Negative |
| Q8MJV4 | AWYKPTAGQGYYSVGRAAGL | Negative |
| Q8MJV4 | TAGQGYYSVGRAAGLLSGFH | Negative |
| Q8MJV4 | LASPGLAWYKPTAGQGYYSV | Negative |
| Q8MJV4 | LLASPGLAWYKPTAGQGY   | Negative |
| Q8MJV4 | PTAGQGYYSVGRAAGLLSGF | Negative |
| Q8MJV4 | AMLVAAALALCLLLASPGLA | Negative |
| Q8MJV4 | ALALCLLLASPGLAWYKPTA | Negative |
| Q8MJV4 | GPAMLVAAALALCLLLASPG | Negative |
| Q8MJV4 | LALCLLLASPGLAWYKPTAG | Negative |
| Q8MJV4 | CLLLASPGLAWYKPTAGQGY | Negative |
| Q8MLZ7 | LSLALSLAVLAQFKVSAAPN | Negative |
| Q8MLZ7 | QFKVSAAPNLVCFYDSQGSQ | Negative |
| Q8MLZ7 | SLAVLAQFKVSAAPNLVCFY | Negative |
| Q8MLZ7 | LAVLAQFKVSAAPNLVCFYD | Negative |
| Q8MLZ7 | SLWLSLALSLAVLAQFKVSA | Negative |
| Q8MLZ7 | ALSLAVLAQFKVSAAPNLVC | Negative |
| Q8MLZ7 | VSAAPNLVCFYDSQGSQRQG | Negative |
| Q8MLZ7 | MTGSLWLSLALSLAVLAQFK | Negative |
| Q8MLZ7 | TGSLWLSLALSLAVLAQFKV | Negative |
| Q8MLZ7 | CFYDSQGSQRQGLAQFSMID | Negative |
| Q8MLZ7 | APNLVCFYDSQGSQRQGLAQ | Negative |
| Q8MLZ7 | AAPNLVCFYDSQGSQRQGLA | Negative |
| Q8MLZ7 | LVCFYDSQGSQRQGLAQFSM | Negative |
| Q8MLZ7 | AQFKVSAAPNLVCFYDSQGS | Negative |
| Q8MLZ7 | FKVSAAPNLVCFYDSQGSQR | Negative |
| Q8MLZ7 | NLVCFYDSQGSQRQGLAQFS | Negative |
| Q8MLZ7 | LSLAVLAQFKVSAAPNLVCF | Negative |
| Q8MLZ7 | SLALSLAVLAQFKVSAAPNL | Negative |
| Q8MLZ7 | GSLWLSLALSLAVLAQFKVS | Negative |
| Q8MLZ7 | SAAPNLVCFYDSQGSQRQGL | Negative |
| Q8MLZ7 | LAQFKVSAAPNLVCFYDSQG | Negative |
| Q8MLZ7 | AVLAQFKVSAAPNLVCFYDS | Negative |
| Q8MLZ7 | WLSLALSLAVLAQFKVSAAP | Negative |
| Q8MLZ7 | VLAQFKVSAAPNLVCFYDSQ | Negative |
| Q8MLZ7 | PNLVCFYDSQGSQRQGLAQF | Negative |
| Q8MLZ7 | LWLSLALSLAVLAQFKVSAA | Negative |
| Q8MLZ7 | FYDSQGSQRQGLAQFSMIDI | Negative |
| Q8MLZ7 | KVSAAPNLVCFYDSQGSQRQ | Negative |
| Q8MLZ7 | VCFYDSQGSQRQGLAQFSMI | Negative |
| Q8MM24 | QLFYILGLLSVTSLTHAASN | Negative |
| Q8MM24 | SLTHAASNLCYYDSNSYLR  | Negative |
| Q8MM24 | AASNLCYYDSNSYLRQGLA  | Negative |
| Q8MM24 | ILGLLSVTSLTHAASNLCY  | Negative |

|        |                       |          |
|--------|-----------------------|----------|
| Q8MM24 | LFYILGLLSVTS�THAASNL  | Negative |
| Q8MM24 | SVTS�THAASNLICYYSNS   | Negative |
| Q8MM24 | YILGLLSVTS�THAASNLIC  | Negative |
| Q8MM24 | YYDSNSYLRLQGLAKMHTNEL | Negative |
| Q8MM24 | ASNLICYYSNSYLRLQGLAK  | Negative |
| Q8MM24 | DSNSYLRLQGLAKMHTNELDL | Negative |
| Q8MM24 | NLCIYYDSNSYLRLQGLAKMH | Negative |
| Q8MM24 | VTSLTHAASNLICYYSNSY   | Negative |
| Q8MM24 | LGLLSVTS�THAASNLICY   | Negative |
| Q8MM24 | LTHAASNLICYYSNSYLRLQ  | Negative |
| Q8MM24 | SNLCIYYDSNSYLRLQGLAKM | Negative |
| Q8MM24 | MRFLFYILGLLSVTS�THA   | Negative |
| Q8MM24 | LSVTS�THAASNLICYYSN   | Negative |
| Q8MM24 | HAASNLICYYSNSYLRLQGL  | Negative |
| Q8MM24 | YDSNSYLRLQGLAKMHTNELD | Negative |
| Q8MM24 | TS�THAASNLICYYSNSYL   | Negative |
| Q8MM24 | RFQLFYILGLLSVTS�THAA  | Negative |
| Q8MM24 | LICYYSNSYLRLQGLAKMHT  | Negative |
| Q8MM24 | LLSVTS�THAASNLICYYS   | Negative |
| Q8MM24 | CYYDSNSYLRLQGLAKMHTNE | Negative |
| Q8MM24 | FQLFYILGLLSVTS�THAAS  | Negative |
| Q8MM24 | SNSYLRLQGLAKMHTNELDLA | Negative |
| Q8MM24 | ICYYSNSYLRLQGLAKMHTN  | Negative |
| Q8MM24 | GLLSVTS�THAASNLICY    | Negative |
| Q8MM24 | THAASNLICYYSNSYLRLQG  | Negative |
| Q8MMG9 | GLLTLQVLVFCALTGSLASA  | Negative |
| Q8MMG9 | AKPSVGLLTLQVLVFCALTG  | Negative |
| Q8MMG9 | LQVLVFCALTGSLASAGSIG  | Negative |
| Q8MMG9 | KTPMAKPSVGLLTLQVLVF   | Negative |
| Q8MMG9 | GSLASAGSIGHVTPRSDLCD  | Negative |
| Q8MMG9 | LTLQVLVFCALTGSLASAGS  | Negative |
| Q8MMG9 | VLVFCALTGSLASAGSIGHV  | Negative |
| Q8MMG9 | LVFCALTGSLASAGSIGHVT  | Negative |
| Q8MMG9 | LASAGSIGHVTPRSDLCDSE  | Negative |
| Q8MMG9 | SVGLLTLQVLVFCALTGSLA  | Negative |
| Q8MMG9 | MAKTPMAKPSVGLLTLQVL   | Negative |
| Q8MMG9 | TTPMAKPSVGLLTLQVLVFC  | Negative |
| Q8MMG9 | LLTLQVLVFCALTGSLASAG  | Negative |
| Q8MMG9 | VGLLTLQVLVFCALTGSLAS  | Negative |
| Q8MMG9 | ASAGSIGHVTPRSDLCDSEV  | Negative |
| Q8MMG9 | KPSVGLLTLQVLVFCALTGS  | Negative |
| Q8MMG9 | ALTGSLASAGSIGHVTPRSD  | Negative |
| Q8MMG9 | TPMAKPSVGLLTLQVLVFCA  | Negative |
| Q8MMG9 | PMAKPSVGLLTLQVLVFCAL  | Negative |
| Q8MMG9 | TGSLASAGSIGHVTPRSDLC  | Negative |
| Q8MMG9 | VFCALTGSLASAGSIGHVTP  | Negative |

|        |                       |          |
|--------|-----------------------|----------|
| Q8MMG9 | SLASAGSIGHVTPRSDLCDS  | Negative |
| Q8MMG9 | CALTGSLASAGSIGHVTPRS  | Negative |
| Q8MMG9 | AKTTPMAKPSVGLLTLQVLV  | Negative |
| Q8MMG9 | MAKPSVGLLTLQVLVFCALT  | Negative |
| Q8MMG9 | FCALTGSLASAGSIGHVTPR  | Negative |
| Q8MMG9 | TLQVLVFCALTGSLASAGSI  | Negative |
| Q8MMG9 | PSVGLLTLQVLVFCALTGSL  | Negative |
| Q8MMG9 | LTGSLASAGSIGHVTPRSDL  | Negative |
| Q8MMH3 | EGCNVDPKGIHGLWYLDEPF  | Negative |
| Q8MMH3 | FGDAVNEGCNVDPKGIHGLW  | Negative |
| Q8MMH3 | LLAQIFACAFGDAVNEGCNV  | Negative |
| Q8MMH3 | PLILPLLAQIFACAFGDAVN  | Negative |
| Q8MMH3 | VNEGCNVDPKGIHGLWYLDE  | Negative |
| Q8MMH3 | ILPLLAQIFACAFGDAVNEG  | Negative |
| Q8MMH3 | GCNVDPKGIHGLWYLDEPFG  | Negative |
| Q8MMH3 | NVDPKGIHGLWYLDEPFGVY  | Negative |
| Q8MMH3 | IFACAFGDAVNEGCNVDPKG  | Negative |
| Q8MMH3 | AVNEGCNVDPKGIHGLWYLD  | Negative |
| Q8MMH3 | MWSPLILPLLAQIFACAFGD  | Negative |
| Q8MMH3 | CNVDPKGIHGLWYLDEPFGV  | Negative |
| Q8MMH3 | SPLILPLLAQIFACAFGDAV  | Negative |
| Q8MMH3 | CAFGDAVNEGCNVDPKGIHG  | Negative |
| Q8MMH3 | DAVNEGCNVDPKGIHGLWYL  | Negative |
| Q8MMH3 | GDAVNEGCNVDPKGIHGLWY  | Negative |
| Q8MMH3 | VDPKGIHGLWYLDEPFGVYL  | Negative |
| Q8MMH3 | QIFACAFGDAVNEGCNVDPK  | Negative |
| Q8MMH3 | PKGIHGLWYLDEPFGVYLSA  | Negative |
| Q8MMH3 | LAQIFACAFGDAVNEGCNVD  | Negative |
| Q8MMH3 | ACAFGDAVNEGCNVDPKGIH  | Negative |
| Q8MMH3 | LPLLAQIFACAFGDAVNEGC  | Negative |
| Q8MMH3 | FACAFGDAVNEGCNVDPKGI  | Negative |
| Q8MMH3 | WSPLILPLLAQIFACAFGDA  | Negative |
| Q8MMH3 | PLLAQIFACAFGDAVNEGCN  | Negative |
| Q8MMH3 | DPKGIHGLWYLDEPFGVYLS  | Negative |
| Q8MMH3 | AQIFACAFGDAVNEGCNVDP  | Negative |
| Q8MMH3 | AFGDAVNEGCNVDPKGIHGL  | Negative |
| Q8MMH3 | NEGCNVDPKGIHGLWYLDEP  | Negative |
| Q8MMJ7 | LVLQMFQAQSDAILGKIWEG  | Negative |
| Q8MMJ7 | ALVLQMFQAQSDAILGKIWE  | Negative |
| Q8MMJ7 | VLQMFQAQSDAILGKIWEGI  | Negative |
| Q8MMJ7 | FQMFQAQSDAILGKIWEGIKS | Negative |
| Q8MMJ7 | IWEGIKSLFGKRGLSDLDGL  | Negative |
| Q8MMJ7 | QMFAQSDAILGKIWEGIKSL  | Negative |
| Q8MMJ7 | AILLVALVLQMFQAQSDAIL  | Negative |
| Q8MMJ7 | MFAQSDAILGKIWEGIKSLF  | Negative |
| Q8MMJ7 | AILGKIWEGIKSLFGKRGLS  | Negative |

|        |                      |          |
|--------|----------------------|----------|
| Q8MMJ7 | WEGIKSLFGKRGLSDLGDL  | Negative |
| Q8MMJ7 | ILGKIWEGIKSLFGKRGLSD | Negative |
| Q8MMJ7 | DAILGKIWEGIKSLFGKRGL | Negative |
| Q8MMJ7 | LGKIWEGIKSLFGKRGLSDL | Negative |
| Q8MMJ7 | QFAILLVALVLFQMFAQSDA | Negative |
| Q8MMJ7 | LFQMFAQSDAILGKIWEGIK | Negative |
| Q8MMJ7 | LLVALVLFQMFAQSDAILGK | Negative |
| Q8MMJ7 | SDAILGKIWEGIKSLFGKRG | Negative |
| Q8MMJ7 | ILLVALVLFQMFAQSDAILG | Negative |
| Q8MMJ7 | FAQSDAILGKIWEGIKSLFG | Negative |
| Q8MMJ7 | GKIWEGIKSLFGKRGLSDL  | Negative |
| Q8MMJ7 | VALVLFQMFAQSDAILGKIW | Negative |
| Q8MMJ7 | KTQFAILLVALVLFQMFAQS | Negative |
| Q8MMJ7 | AQSDAILGKIWEGIKSLFGK | Negative |
| Q8MMJ7 | FAILLVALVLFQMFAQSDAI | Negative |
| Q8MMJ7 | KIWEGIKSLFGKRGLSDLG  | Negative |
| Q8MMJ7 | MKTQFAILLVALVLFQMFAQ | Negative |
| Q8MMJ7 | TQFAILLVALVLFQMFAQSD | Negative |
| Q8MMJ7 | QSDAILGKIWEGIKSLFGKR | Negative |
| Q8MMJ7 | EGIKSLFGKRGLSDLGDLDE | Negative |
| Q8MP00 | TFSTSSSFRRALVALLVCT  | Negative |
| Q8MP00 | STSSSFRRALVALLVCTLL  | Negative |
| Q8MP00 | SFSRRALVALLVCTLLIDLS | Negative |
| Q8MP00 | FSTSSSFRRALVALLVCTL  | Negative |
| Q8MP00 | TDARPQDDPTSVAEAIRLLQ | Negative |
| Q8MP00 | IDLSSFTDARPQDDPTSVAE | Negative |
| Q8MP00 | RALVALLVCTLLIDLSSFTD | Negative |
| Q8MP00 | SSFSRRALVALLVCTLLIDL | Negative |
| Q8MP00 | SRRALVALLVCTLLIDLSSF | Negative |
| Q8MP00 | FTDARPQDDPTSVAEAIRLL | Negative |
| Q8MP00 | TLLIDLSSFTDARPQDDPTS | Negative |
| Q8MP00 | MTFSTSSSFRRALVALLVC  | Negative |
| Q8MP00 | LLVCTLLIDLSSFTDARPQD | Negative |
| Q8MP00 | LVCTLLIDLSSFTDARPQDD | Negative |
| Q8MP00 | VALLVCTLLIDLSSFTDARP | Negative |
| Q8MP00 | ALLVCTLLIDLSSFTDARPQ | Negative |
| Q8MP00 | TSSSFRRALVALLVCTLLI  | Negative |
| Q8MP00 | CTLLIDLSSFTDARPQDDPT | Negative |
| Q8MP00 | FSRRALVALLVCTLLIDLSS | Negative |
| Q8MP00 | LIDLSSFTDARPQDDPTSVA | Negative |
| Q8MP00 | SFTDARPQDDPTSVAEAIRL | Negative |
| Q8MP00 | LVALLVCTLLIDLSSFTDAR | Negative |
| Q8MP00 | RRALVALLVCTLLIDLSSFT | Negative |
| Q8MP00 | LLIDLSSFTDARPQDDPTSV | Negative |
| Q8MP00 | SSFTDARPQDDPTSVAEAIR | Negative |
| Q8MP00 | VCTLLIDLSSFTDARPQDDP | Negative |

|        |                         |          |
|--------|-------------------------|----------|
| Q8MP00 | SSSFSRRALVALLVCTLLID    | Negative |
| Q8MP00 | LSSFTDARPQDDPTSVAEAI    | Negative |
| Q8MP00 | DLSSFTDARPQDDPTSVAEA    | Negative |
| Q8MP06 | RVCIIGAGYSGLATARYLQD    | Negative |
| Q8MP06 | LSLLVAAGISQASSASRVCI    | Negative |
| Q8MP06 | FVIMLVLSLLVAAGISQASS    | Negative |
| Q8MP06 | QASSASRVCIIGAGYSGLAT    | Negative |
| Q8MP06 | GISQASSASRVCIIGAGYSG    | Negative |
| Q8MP06 | VAAGISQASSASRVCIIGAG    | Negative |
| Q8MP06 | ASRVCIIGAGYSGLATARYL    | Negative |
| Q8MP06 | SSASRVCIIGAGYSGLATAR    | Negative |
| Q8MP06 | IIGAGYSGLATARYLQDYGL    | Negative |
| Q8MP06 | MFRKFVIMLVLSLLVAAGIS    | Negative |
| Q8MP06 | ASSASRVCIIGAGYSGLATA    | Negative |
| Q8MP06 | SQASSASRVCIIGAGYSGLA    | Negative |
| Q8MP06 | KFVIMLVLSLLVAAGISQAS    | Negative |
| Q8MP06 | FRKFVIMLVLSLLVAAGISQ    | Negative |
| Q8MP06 | LLVAAGISQASSASRVCIIG    | Negative |
| Q8MP06 | VIMLVLSLLVAAGISQASSA    | Negative |
| Q8MP06 | CIIGAGYSGLATARYLQDYG    | Negative |
| Q8MP06 | AGISQASSASRVCIIGAGYS    | Negative |
| Q8MP06 | IMLVLSLLVAAGISQASSAS    | Negative |
| Q8MP06 | VLSLLVAAGISQASSASRVC    | Negative |
| Q8MP06 | LVAAGISQASSASRVCIIGA    | Negative |
| Q8MP06 | RKFVIMLVLSLLVAAGISQA    | Negative |
| Q8MP06 | SLLVAAGISQASSASRVCI     | Negative |
| Q8MP06 | ISQASSASRVCIIGAGYSGL    | Negative |
| Q8MP06 | LVLVLSLLVAAGISQASSASRV  | Negative |
| Q8MP06 | SASRVCIIGAGYSGLATARY    | Negative |
| Q8MP06 | VCIIGAGYSGLATARYLQDY    | Negative |
| Q8MP06 | AAGISQASSASRVCIIGAGY    | Negative |
| Q8MP06 | SRVCIIGAGYSGLATARYLQ    | Negative |
| Q8MTX2 | QSEAI FGAIWNGIKSLFGRR   | Negative |
| Q8MTX2 | AILLVALVLFQMFAQSEAI     | Negative |
| Q8MTX2 | TQFAILLVALVLFQMFAQSE    | Negative |
| Q8MTX2 | WNGIKSLFGRRALNNDLDD     | Negative |
| Q8MTX2 | IFGAIWNGIKSLFGRRALNN    | Negative |
| Q8MTX2 | EAI FGAIWNGIKSLFGRRAL   | Negative |
| Q8MTX2 | ILLVALVLFQMFAQSEAI      | Negative |
| Q8MTX2 | FAILLVALVLFQMFAQSEAI    | Negative |
| Q8MTX2 | FGAIWNGIKSLFGRRALNND    | Negative |
| Q8MTX2 | KTQFAILLVALVLFQMFAQS    | Negative |
| Q8MTX2 | MKTQFAILLVALVLFQMFAQ    | Negative |
| Q8MTX2 | NGIKSLFGRRALNNDLDDG     | Negative |
| Q8MTX2 | QMFAQSEAI FGAIWNGIKSL   | Negative |
| Q8MTX2 | LVLVLFQMFAQSEAI FGAIWNG | Negative |

|        |                       |          |
|--------|-----------------------|----------|
| Q8MTX2 | LLVALVLFQMFAQSEAIFGA  | Negative |
| Q8MTX2 | AQSEAIFGAIWNGIKSLFGR  | Negative |
| Q8MTX2 | LFQMFAQSEAIFGAIWNGIK  | Negative |
| Q8MTX2 | VALVLFQMFAQSEAIFGAIW  | Negative |
| Q8MTX2 | QFAILLVALVLFQMFAQSEA  | Negative |
| Q8MTX2 | MFAQSEAIFGAIWNGIKSLF  | Negative |
| Q8MTX2 | AIFGAIWNGIKSLFGRRALN  | Negative |
| Q8MTX2 | IWNGIKSLFGRRALNNDL    | Negative |
| Q8MTX2 | SEAIFGAIWNGIKSLFGARRA | Negative |
| Q8MTX2 | VLFQMFAQSEAIFGAIWNGI  | Negative |
| Q8MTX2 | FQMFAQSEAIFGAIWNGIKS  | Negative |
| Q8MTX2 | ALVLFQMFAQSEAIFGAIWN  | Negative |
| Q8MTX2 | AIWNGIKSLFGRRALNNDLD  | Negative |
| Q8MTX2 | GAIWNGIKSLFGRRALNNDL  | Negative |
| Q8MTX2 | FAQSEAIFGAIWNGIKSLFG  | Negative |
| Q8MVA6 | ECVYFVMSEPDGPQWQVKA   | Negative |
| Q8MVA6 | AVAIFIVTLLVLECVYFVMS  | Negative |
| Q8MVA6 | EPDPGPQWQVKAGRPPCYSI  | Negative |
| Q8MVA6 | VAIFIVTLLVLECVYFVMSE  | Negative |
| Q8MVA6 | FVMSEPDGPQWQVKAGRPP   | Negative |
| Q8MVA6 | FIVTLLVLECVYFVMSEPD   | Negative |
| Q8MVA6 | PDPGPQWQVKAGRPPCYSIP  | Negative |
| Q8MVA6 | VYFVMSEPDGPQWQVKAGR   | Negative |
| Q8MVA6 | LECVYFVMSEPDGPQWQVK   | Negative |
| Q8MVA6 | AIFIVTLLVLECVYFVMSEP  | Negative |
| Q8MVA6 | SEPDPGPQWQVKAGRPPCYS  | Negative |
| Q8MVA6 | PWQVKAGRPPCYSIPCRKHD  | Negative |
| Q8MVA6 | PGQPWQVKAGRPPCYSIPCR  | Negative |
| Q8MVA6 | VMSEPDGPQWQVKAGRPPC   | Negative |
| Q8MVA6 | QPWQVKAGRPPCYSIPCRKH  | Negative |
| Q8MVA6 | RAVAIFIVTLLVLECVYFVM  | Negative |
| Q8MVA6 | IFIVTLLVLECVYFVMSEPD  | Negative |
| Q8MVA6 | LVLECVYFVMSEPDGPQWQ   | Negative |
| Q8MVA6 | IVTLLVLECVYFVMSEPDGP  | Negative |
| Q8MVA6 | GQPWQVKAGRPPCYSIPCRK  | Negative |
| Q8MVA6 | WQVKAGRPPCYSIPCRKHDE  | Negative |
| Q8MVA6 | MSEPDGPQWQVKAGRPPCY   | Negative |
| Q8MVA6 | VLECVYFVMSEPDGPQWQV   | Negative |
| Q8MVA6 | CVYFVMSEPDGPQWQVKAG   | Negative |
| Q8MVA6 | MRAVAIFIVTLLVLECVYFV  | Negative |
| Q8MVA6 | YFVMSEPDGPQWQVKAGRP   | Negative |
| Q8MVA6 | LLVLECVYFVMSEPDGPQW   | Negative |
| Q8MVA6 | TLLVLECVYFVMSEPDGPQP  | Negative |
| Q8MVA6 | DPGPQWQVKAGRPPCYSIPC  | Negative |
| Q8N474 | RRGAALGVLLALGAALLAVG  | Negative |
| Q8N474 | SASEYDYVSFQSDIGPYQSG  | Negative |



|        |                       |          |
|--------|-----------------------|----------|
| Q8N474 | RGAAALGVLLALGAALLAVGS | Negative |
| Q8N474 | AVGSASEYDYVSFQSDIGPY  | Negative |
| Q8N474 | GRRGAALGVLLALGAALLAV  | Negative |
| Q8N474 | VGSASEYDYVSFQSDIGPYQ  | Negative |
| Q8N474 | LGAALLAVGSASEYDYVSFQ  | Negative |
| Q8N474 | IGRSEGGRRGAAALGVLLALG | Negative |
| Q8N474 | GIGRSEGGRRGAAALGVLLAL | Negative |
| Q8N474 | LALGAALLAVGSASEYDYVS  | Negative |
| Q8N474 | RSEGGRRGAAALGVLLALGAA | Negative |
| Q8N474 | AALLAVGSASEYDYVSFQSD  | Negative |
| Q8N474 | ALGAALLAVGSASEYDYVSF  | Negative |
| Q8N474 | LLALGAALLAVGSASEYDYV  | Negative |
| Q8N474 | GAALGVLLALGAALLAVGSA  | Negative |
| Q8N474 | GSASEYDYVSFQSDIGPYQS  | Negative |
| Q8N474 | MGIGRSEGGRRGAAALGVLLA | Negative |
| Q8N474 | GRSEGGRRGAAALGVLLALGA | Negative |
| Q8N474 | GVLLALGAALLAVGSASEYD  | Negative |
| Q8N474 | ALGVLLALGAALLAVGSASE  | Negative |
| Q8N474 | LGVLLALGAALLAVGSASEY  | Negative |
| Q8N474 | GAALLAVGSASEYDYVSFQS  | Negative |
| Q8N474 | GRRGAALGVLLALGAALLA   | Negative |
| Q8N474 | SEGGRRGAAALGVLLALGAAL | Negative |
| Q8N474 | EGRRGAALGVLLALGAALL   | Negative |
| Q8N474 | LAVGSASEYDYVSFQSDIGP  | Negative |
| Q8N474 | ALLAVGSASEYDYVSFQSDI  | Negative |
| Q8N474 | LLAVGSASEYDYVSFQSDIG  | Negative |
| Q8N474 | AALGVLLALGAALLAVGSAS  | Negative |
| Q8N4F0 | LLPVVGASTPGTVVRLNKA   | Negative |
| Q8N4F0 | ASTPGTVVRLNKAALSYVSE  | Negative |
| Q8N4F0 | MAWASRLGLLLALLLPVVG   | Negative |
| Q8N4F0 | GASTPGTVVRLNKAALSYVS  | Negative |
| Q8N4F0 | WASRLGLLLALLLPVVGAST  | Negative |
| Q8N4F0 | LLLALLLPVVGASTPGTVVR  | Negative |
| Q8N4F0 | GLLLALLLPVVGASTPGTVV  | Negative |
| Q8N4F0 | VVGASTPGTVVRLNKAALSY  | Negative |
| Q8N4F0 | LNKAALSYVSEIGKAPLQRA  | Negative |
| Q8N4F0 | LLPVVGASTPGTVVRLNKA   | Negative |
| Q8N4F0 | TPGTVVRLNKAALSYVSEIG  | Negative |
| Q8N4F0 | PGTVVRLNKAALSYVSEIGK  | Negative |
| Q8N4F0 | LLALLLPVVGASTPGTVVRL  | Negative |
| Q8N4F0 | VVRLNKAALSYVSEIGKAPL  | Negative |
| Q8N4F0 | NKAALSYVSEIGKAPLQRAL  | Negative |
| Q8N4F0 | LGLLLALLLPVVGASTPGTV  | Negative |
| Q8N4F0 | TVVRLNKAALSYVSEIGKAP  | Negative |
| Q8N4F0 | STPGTVVRLNKAALSYVSEI  | Negative |
| Q8N4F0 | PVVGASTPGTVVRLNKAALS  | Negative |

|        |                      |          |
|--------|----------------------|----------|
| Q8N4F0 | VRLNKAALSYVSEIGKAPLQ | Negative |
| Q8N4F0 | AWASRLGLLLALLPVVGAS  | Negative |
| Q8N4F0 | SRLGLLLALLPVVGASTPG  | Negative |
| Q8N4F0 | GTVVRLNKAALSYVSEIGKA | Negative |
| Q8N4F0 | ASRLGLLLALLPVVGASTP  | Negative |
| Q8N4F0 | VGASTPGTVVRLNKAALSYV | Negative |
| Q8N4F0 | LALLPVVGASTPGTVVRLN  | Negative |
| Q8N4F0 | LPVVGASTPGTVVRLNKAAL | Negative |
| Q8N4F0 | ALLPVVGASTPGTVVRLNK  | Negative |
| Q8N4F0 | RLNKAALSYVSEIGKAPLQR | Negative |
| Q8N6C8 | TVLICLGLSLDPRTHVQAGP | Negative |
| Q8N6C8 | TLWAEPGSVITQGSPTLRC  | Negative |
| Q8N6C8 | AGPLPKPTLWAEPGSVITQG | Negative |
| Q8N6C8 | DPRTHVQAGPLPKPTLWAEP | Negative |
| Q8N6C8 | CLGLSLDPRTHVQAGPLPKP | Negative |
| Q8N6C8 | LSLDPRTHVQAGPLPKPTLW | Negative |
| Q8N6C8 | GLSLDPRTHVQAGPLPKPTL | Negative |
| Q8N6C8 | PKPTLWAEPGSVITQGSPT  | Negative |
| Q8N6C8 | HVQAGPLPKPTLWAEPGSVI | Negative |
| Q8N6C8 | PTLWAEPGSVITQGSPTLR  | Negative |
| Q8N6C8 | VLICLGLSLDPRTHVQAGPL | Negative |
| Q8N6C8 | LPKPTLWAEPGSVITQGSPT | Negative |
| Q8N6C8 | PRTHVQAGPLPKPTLWAEPG | Negative |
| Q8N6C8 | SLDPRTHVQAGPLPKPTLWA | Negative |
| Q8N6C8 | ILTVLICLGLSLDPRTHVQA | Negative |
| Q8N6C8 | GPLPKPTLWAEPGSVITQGS | Negative |
| Q8N6C8 | TPILTVLICLGLSLDPRTHV | Negative |
| Q8N6C8 | QAGPLPKPTLWAEPGSVITQ | Negative |
| Q8N6C8 | PLPKPTLWAEPGSVITQGSP | Negative |
| Q8N6C8 | THVQAGPLPKPTLWAEPGSV | Negative |
| Q8N6C8 | LTVLICLGLSLDPRTHVQAG | Negative |
| Q8N6C8 | LGLSLDPRTHVQAGPLPKPT | Negative |
| Q8N6C8 | PILTVLICLGLSLDPRTHVQ | Negative |
| Q8N6C8 | KPTLWAEPGSVITQGSPTL  | Negative |
| Q8N6C8 | LDPRTHVQAGPLPKPTLWAE | Negative |
| Q8N6C8 | VQAGPLPKPTLWAEPGSVIT | Negative |
| Q8N6C8 | LICLGLSLDPRTHVQAGPLP | Negative |
| Q8N6C8 | RTHVQAGPLPKPTLWAEPGS | Negative |
| Q8N6C8 | MTPILTVLICLGLSLDPRTH | Negative |
| Q8N6Q3 | PLPGVQALLCQFGTVQHVK  | Negative |
| Q8N6Q3 | LPLPGVQALLCQFGTVQHVW | Negative |
| Q8N6Q3 | GTVQHVKVSDLPQWTPKN   | Negative |
| Q8N6Q3 | MSAVLLLALLGFILPLPGVQ | Negative |
| Q8N6Q3 | VQALLCQFGTVQHVKVSDLP | Negative |
| Q8N6Q3 | TVQHVKVSDLPQWTPKNT   | Negative |
| Q8N6Q3 | QHVKVSDLPQWTPKNTSC   | Negative |

|        |                      |          |
|--------|----------------------|----------|
| Q8N6Q3 | LCQFGTVQHVWKVSDLPRQW | Negative |
| Q8N6Q3 | QALLCQFGTVQHVWKVSDLP | Negative |
| Q8N6Q3 | LLCQFGTVQHVWKVSDLPRQ | Negative |
| Q8N6Q3 | CQFGTVQHVWKVSDLPRQWT | Negative |
| Q8N6Q3 | GVQALLCQFGTVQHVWKVSD | Negative |
| Q8N6Q3 | LGFILPLPGVQALLCQFGTV | Negative |
| Q8N6Q3 | VQHVWKVSDLPRQWTPKNTS | Negative |
| Q8N6Q3 | ALLGFILPLPGVQALLCQFG | Negative |
| Q8N6Q3 | SAVLLLALLGFILPLPGVQA | Negative |
| Q8N6Q3 | ALLCQFGTVQHVWKVSDLPR | Negative |
| Q8N6Q3 | VLLLALLGFILPLPGVQALL | Negative |
| Q8N6Q3 | GFILPLPGVQALLCQFGTVQ | Negative |
| Q8N6Q3 | ILPLPGVQALLCQFGTVQHV | Negative |
| Q8N6Q3 | LLGFILPLPGVQALLCQFGT | Negative |
| Q8N6Q3 | LLLALLGFILPLPGVQALLC | Negative |
| Q8N6Q3 | FGTVQHVWKVSDLPRQWTPK | Negative |
| Q8N6Q3 | FILPLPGVQALLCQFGTVQH | Negative |
| Q8N6Q3 | PGVQALLCQFGTVQHVWKVS | Negative |
| Q8N6Q3 | QFGTVQHVWKVSDLPRQWTP | Negative |
| Q8N6Q3 | LPGVQALLCQFGTVQHVWKV | Negative |
| Q8N6Q3 | LLALLGFILPLPGVQALLCQ | Negative |
| Q8N6Q3 | AVLLLALLGFILPLPGVQAL | Negative |
| Q8NBK3 | LLSLLCGAAGSQEAGTGAGA | Negative |
| Q8NBK3 | RCPELGLVLLLLLLSLLCGA | Negative |
| Q8NBK3 | ALGLVCGRCPELGLVLLLLL | Negative |
| Q8NBK3 | LLLLSLLCGAAGSQEAGTGA | Negative |
| Q8NBK3 | CGAAGSQEAGTGAGAGSLAG | Negative |
| Q8NBK3 | LGLVCGRCPELGLVLLLLLL | Negative |
| Q8NBK3 | GLVLLLLLLSLLCGAAGSQE | Negative |
| Q8NBK3 | LLSLLCGAAGSQEAGTGAG  | Negative |
| Q8NBK3 | SLLCGAAGSQEAGTGAGAGS | Negative |
| Q8NBK3 | LVCGRCPGLVLLLLLLSL   | Negative |
| Q8NBK3 | GRCPELGLVLLLLLLSLLCG | Negative |
| Q8NBK3 | AAPALGLVCGRCPELGLVLL | Negative |
| Q8NBK3 | ELGLVLLLLLLSLLCGAAGS | Negative |
| Q8NBK3 | GLVCGRCPELGLVLLLLLLS | Negative |
| Q8NBK3 | CGRCPGLVLLLLLLSLLC   | Negative |
| Q8NBK3 | LLLLLLSLLCGAAGSQEAGT | Negative |
| Q8NBK3 | LSLLCGAAGSQEAGTGAGAG | Negative |
| Q8NBK3 | APALGLVCGRCPELGLVLLL | Negative |
| Q8NBK3 | LGLVLLLLLLSLLCGAAGSQ | Negative |
| Q8NBK3 | PELGLVLLLLLLSLLCGAAG | Negative |
| Q8NBK3 | LCGAAGSQEAGTGAGAGSLA | Negative |
| Q8NBK3 | PALGLVCGRCPELGLVLLLL | Negative |
| Q8NBK3 | MAAPALGLVCGRCPELGLVL | Negative |
| Q8NBK3 | CPELGLVLLLLLLSLLCGAA | Negative |

|        |                      |          |
|--------|----------------------|----------|
| Q8NBK3 | VCGRCPGLVLLLLLLSLL   | Negative |
| Q8NBK3 | GAAGSQEAGTGAGAGSLAGS | Negative |
| Q8NBK3 | LLCGAAGSQEAGTGAGAGSL | Negative |
| Q8NBK3 | LLLLSLLCGAAGSQEAGTG  | Negative |
| Q8NBK3 | LVLLLLLLSLLCGAAGSQEA | Negative |
| Q8NBL1 | PSAQGRQKESGSKWKVFIDQ | Negative |
| Q8NBL1 | QKESGSKWKVFIDQINRSLE | Negative |
| Q8NBL1 | LLPSAQGRQKESGSKWKVFI | Negative |
| Q8NBL1 | WWASSPLRLWLLFLLPSAQ  | Negative |
| Q8NBL1 | SPLRLWLLFLLPSAQGRQK  | Negative |
| Q8NBL1 | PLRLWLLFLLPSAQGRQKE  | Negative |
| Q8NBL1 | RLWLLFLLPSAQGRQKESG  | Negative |
| Q8NBL1 | LFLPSAQGRQKESGSKWKV  | Negative |
| Q8NBL1 | SKWKVFIDQINRSLENYEPC | Negative |
| Q8NBL1 | MEWWASSPLRLWLLFLLPS  | Negative |
| Q8NBL1 | WLLFLLPSAQGRQKESGSK  | Negative |
| Q8NBL1 | GRQKESGSKWKVFIDQINRS | Negative |
| Q8NBL1 | FLLPSAQGRQKESGSKWKVF | Negative |
| Q8NBL1 | WASSPLRLWLLFLLPSAQG  | Negative |
| Q8NBL1 | SGSKWKVFIDQINRSLENYE | Negative |
| Q8NBL1 | EWASSPLRLWLLFLLPSA   | Negative |
| Q8NBL1 | KESGSKWKVFIDQINRSLEN | Negative |
| Q8NBL1 | AQGRQKESGSKWKVFIDQIN | Negative |
| Q8NBL1 | SAQGRQKESGSKWKVFIDQI | Negative |
| Q8NBL1 | ESGSKWKVFIDQINRSLENY | Negative |
| Q8NBL1 | LLFLLPSAQGRQKESGSKWK | Negative |
| Q8NBL1 | LLLFLPSAQGRQKESGSKW  | Negative |
| Q8NBL1 | RQKESGSKWKVFIDQINRSL | Negative |
| Q8NBL1 | GSKWKVFIDQINRSLENYEP | Negative |
| Q8NBL1 | ASSPLRLWLLFLLPSAQGR  | Negative |
| Q8NBL1 | SSPLRLWLLFLLPSAQGRQ  | Negative |
| Q8NBL1 | LPSAQGRQKESGSKWKVFID | Negative |
| Q8NBL1 | LWLLFLLPSAQGRQKESGS  | Negative |
| Q8NBL1 | QGRQKESGSKWKVFIDQINR | Negative |
| Q8NBM8 | ALLAAAAAGGDAPPGKIAVV | Negative |
| Q8NBM8 | LTALLAAAAAGGDAPPGKIA | Negative |
| Q8NBM8 | LAAAAAGGDAPPGKIAVVG  | Negative |
| Q8NBM8 | GGDAPPGKIAVVGAGIGGSA | Negative |
| Q8NBM8 | TALLAAAAAGGDAPPGKIAV | Negative |
| Q8NBM8 | IAVVGAGIGGSVAHFLQQH  | Negative |
| Q8NBM8 | LLAAAAAGGDAPPGKIAVVG | Negative |
| Q8NBM8 | AAPLLAALTALLAAAAAGGD | Negative |
| Q8NBM8 | AAAAAGGDAPPGKIAVVGAG | Negative |
| Q8NBM8 | AAGGDAPPGKIAVVGAGIGG | Negative |
| Q8NBM8 | MARAAPLLAALTALLAAAAA | Negative |
| Q8NBM8 | ARAAPLLAALTALLAAAAAG | Negative |

|        |                        |          |
|--------|------------------------|----------|
| Q8NBM8 | AAAGGDAPPGKIAVVGAGIG   | Negative |
| Q8NBM8 | KIAVVGAGIGGSAVAHFLQQ   | Negative |
| Q8NBM8 | RAAPLLAALTALLAAAAAGG   | Negative |
| Q8NBM8 | DAPPGKIAVVGAGIGGSAVA   | Negative |
| Q8NBM8 | APLLAALTALLAAAAAGGDA   | Negative |
| Q8NBM8 | PLLAALTALLAAAAAGGDAP   | Negative |
| Q8NBM8 | LLAALTALLAAAAAGGDAPP   | Negative |
| Q8NBM8 | AGGDAPPGKIAVVGAGIGGS   | Negative |
| Q8NBM8 | ALTALLAAAAAGGDAPPGKI   | Negative |
| Q8NBM8 | AVVGAGIGGSAVAHFLQQHF   | Negative |
| Q8NBM8 | PGKIAVVGAGIGGSAVAHFL   | Negative |
| Q8NBM8 | AALTALLAAAAAGGDAPPGK   | Negative |
| Q8NBM8 | GKIAVVGAGIGGSAVAHFLQ   | Negative |
| Q8NBM8 | PPGKIAVVGAGIGGSAVAHF   | Negative |
| Q8NBM8 | AAAAGGDAPPGKIAVVGAGI   | Negative |
| Q8NBM8 | APPGKIAVVGAGIGGSAVAH   | Negative |
| Q8NBM8 | GDAPPGKIAVVGAGIGGSAV   | Negative |
| Q8NBP7 | LLLLGPAGARAQEDEDGDYE   | Negative |
| Q8NBP7 | RRSWWPLLLLLLLLLLLGPA   | Negative |
| Q8NBP7 | LLLLLLLGPAGARAQEDEDG   | Negative |
| Q8NBP7 | GTVSSRRSWWPLLLLLLLLL   | Negative |
| Q8NBP7 | PAGARAQEDEDGDYEELVLA   | Negative |
| Q8NBP7 | WPLLLLLLLLLLLGPAGARA   | Negative |
| Q8NBP7 | WWPLLLLLLLLLLLGPAGAR   | Negative |
| Q8NBP7 | LGPAGARAQEDEDGDYEELV   | Negative |
| Q8NBP7 | SRRSWWPLLLLLLLLLLLGP   | Negative |
| Q8NBP7 | ARAQEDEDGDYEELVLALRS   | Negative |
| Q8NBP7 | GPAGARAQEDEDGDYEELVL   | Negative |
| Q8NBP7 | AQEDEDGDYEELVLALRSEE   | Negative |
| Q8NBP7 | LLGPAGARAQEDEDGDYEEL   | Negative |
| Q8NBP7 | LLLLLLGPAGARAQEDEDGDY  | Negative |
| Q8NBP7 | AGARAQEDEDGDYEELVLAL   | Negative |
| Q8NBP7 | RAQEDEDGDYEELVLALRSE   | Negative |
| Q8NBP7 | LPLLLLLLLLLLLGPAGARAE  | Negative |
| Q8NBP7 | VSSRRSWWPLLLLLLLLLLL   | Negative |
| Q8NBP7 | SWWPLLLLLLLLLLLGPAGA   | Negative |
| Q8NBP7 | SSRRSWWPLLLLLLLLLLLG   | Negative |
| Q8NBP7 | PLLLLLLLLLLLGPAGARAE   | Negative |
| Q8NBP7 | LLLLLLGPAGARAQEDEDGD   | Negative |
| Q8NBP7 | RSWWPLLLLLLLLLLLGPAG   | Negative |
| Q8NBP7 | TVSSRRSWWPLLLLLLLLLLL  | Negative |
| Q8NBP7 | LLLLLLLLLLGPAGARAQE    | Negative |
| Q8NBP7 | GARAQEDEDGDYEELVLALR   | Negative |
| Q8NBP7 | PLPLLLLLLLLLLLGPAGARAE | Negative |
| Q8NBP7 | LLGPAGARAQEDEDGDYEE    | Negative |
| Q8NBP7 | MGTVSSRRSWWPLLLLLLLLL  | Negative |

|        |                       |          |
|--------|-----------------------|----------|
| Q8NCC3 | YRVGLLPDGLLFLLLLLMMLL | Negative |
| Q8NCC3 | DGLLFLLLLLMMLLADPALPA | Negative |
| Q8NCC3 | PDGLLFLLLLLMMLLADPALP | Negative |
| Q8NCC3 | PALPAGRHPVVLVPGDLGN   | Negative |
| Q8NCC3 | PYRVGLLPDGLLFLLLLLML  | Negative |
| Q8NCC3 | LLLLMMLLADPALPAGRHPV  | Negative |
| Q8NCC3 | GLLPDGLLFLLLLLMMLLADP | Negative |
| Q8NCC3 | LLLLMMLLADPALPAGRHP   | Negative |
| Q8NCC3 | RVGLLPDGLLFLLLLLMLLA  | Negative |
| Q8NCC3 | LLFLLLLLMMLLADPALAGR  | Negative |
| Q8NCC3 | VGLLPDGLLFLLLLLMMLAD  | Negative |
| Q8NCC3 | HLRPYRVGLLPDGLLFLLLL  | Negative |
| Q8NCC3 | LLPDGLLFLLLLLMMLADPA  | Negative |
| Q8NCC3 | GLLFLLLLLMMLLADPALPAG | Negative |
| Q8NCC3 | LRPYRVGLLPDGLLFLLLL   | Negative |
| Q8NCC3 | MMLADPALPAGRHPVVLVP   | Negative |
| Q8NCC3 | RPYRVGLLPDGLLFLLLLLM  | Negative |
| Q8NCC3 | LPDGLLFLLLLLMMLLADPAL | Negative |
| Q8NCC3 | LADPALPAGRHPVVLVPGD   | Negative |
| Q8NCC3 | LLMMLADPALPAGRHPVVL   | Negative |
| Q8NCC3 | MGLHLRPYRVGLLPDGLLFL  | Negative |
| Q8NCC3 | LLADPALPAGRHPVVLVPG   | Negative |
| Q8NCC3 | LFLLLLLMMLLADPALAGR   | Negative |
| Q8NCC3 | LLLMLLADPALPAGRHPVV   | Negative |
| Q8NCC3 | LHLRPYRVGLLPDGLLFLLL  | Negative |
| Q8NCC3 | GLHLRPYRVGLLPDGLLFL   | Negative |
| Q8NCC3 | LMLLADPALPAGRHPVVLV   | Negative |
| Q8NCC3 | ADPALPAGRHPVVLVPGDL   | Negative |
| Q8NCC3 | DPALPAGRHPVVLVPGDLG   | Negative |
| Q8NHP8 | MYCYPGSHLARALTRALALA  | Negative |
| Q8NHP8 | GQMYCYPGSHLARALTRALA  | Negative |
| Q8NHP8 | ALALALVLALLVGPFLSGLA  | Negative |
| Q8NHP8 | RALALALVLALLVGPFLSGL  | Negative |
| Q8NHP8 | LLVGPFLSGLAGAIPAPGGR  | Negative |
| Q8NHP8 | RALTRALALALVLALLVGP   | Negative |
| Q8NHP8 | TRALALALVLALLVGPFLSG  | Negative |
| Q8NHP8 | VGQMYCYPGSHLARALTRAL  | Negative |
| Q8NHP8 | LVLALLVGPFLSGLAGAIPA  | Negative |
| Q8NHP8 | ALVLALLVGPFLSGLAGAIP  | Negative |
| Q8NHP8 | LALALVLALLVGPFLSGLAG  | Negative |
| Q8NHP8 | LVGPFLSGLAGAIPAPGGRW  | Negative |
| Q8NHP8 | GSHLARALTRALALALVLAL  | Negative |
| Q8NHP8 | LTRALALALVLALLVGPFLS  | Negative |
| Q8NHP8 | LARALTRALALALVLALLVG  | Negative |
| Q8NHP8 | ALLVGPFLSGLAGAIPAPGG  | Negative |
| Q8NHP8 | VLALLVGPFLSGLAGAIPAP  | Negative |

|        |                      |          |
|--------|----------------------|----------|
| Q8NHP8 | ALTRALALALVLALLVGPFL | Negative |
| Q8NHP8 | SHLARALTRALALALVLALL | Negative |
| Q8NHP8 | CYPGSHLARALTRALALALV | Negative |
| Q8NHP8 | ALALVLALLVGPFLSGLAGA | Negative |
| Q8NHP8 | ARALTRALALALVLALLVGP | Negative |
| Q8NHP8 | MVGQMYCYPGSHLARALTRA | Negative |
| Q8NHP8 | HLARALTRALALALVLALLV | Negative |
| Q8NHP8 | YCYPGSHLARALTRALALAL | Negative |
| Q8NHP8 | YPGSHLARALTRALALALVL | Negative |
| Q8NHP8 | PGSHLARALTRALALALVLA | Negative |
| Q8NHP8 | QMYCYPGSHLARALTRALAL | Negative |
| Q8NHP8 | LALVLALLVGPFLSGLAGAI | Negative |
| Q8NJ73 | LWGQCGGQGWTGAKTCVSGA | Negative |
| Q8NJ73 | AIVLALAPAAAFGQAALWGQ | Negative |
| Q8NJ73 | ALAPAAAFGQAALWGQCGGQ | Negative |
| Q8NJ73 | TPAIVLALAPAAAFGQAALW | Negative |
| Q8NJ73 | AAAFGQAALWGQCGGQGWTG | Negative |
| Q8NJ73 | RTPAIVLALAPAAAFGQAAL | Negative |
| Q8NJ73 | AALWGQCGGQGWTGAKTCVS | Negative |
| Q8NJ73 | QGWTGAKTCVSGAVCQAQNE | Negative |
| Q8NJ73 | AAFGQAALWGQCGGQGWTGA | Negative |
| Q8NJ73 | IVLALAPAAAFGQAALWGQC | Negative |
| Q8NJ73 | AFGQAALWGQCGGQGWTGAK | Negative |
| Q8NJ73 | GTGAKTCVSGAVCQAQNEW  | Negative |
| Q8NJ73 | WTGAKTCVSGAVCQAQNEWY | Negative |
| Q8NJ73 | GQAALWGQCGGQGWTGAKTC | Negative |
| Q8NJ73 | QCGGQGWTGAKTCVSGAVCQ | Negative |
| Q8NJ73 | GQCGGQGWTGAKTCVSGAVC | Negative |
| Q8NJ73 | LALAPAAAFGQAALWGQCGG | Negative |
| Q8NJ73 | LAPAAAFGQAALWGQCGGQG | Negative |
| Q8NJ73 | MRTPAIVLALAPAAAFGQAA | Negative |
| Q8NJ73 | GQGWTGAKTCVSGAVCQAQN | Negative |
| Q8NJ73 | FGQAALWGQCGGQGWTGAKT | Negative |
| Q8NJ73 | GGQGWTGAKTCVSGAVCQAQ | Negative |
| Q8NJ73 | PAIVLALAPAAAFGQAALWG | Negative |
| Q8NJ73 | WGQCGGQGWTGAKTCVSGAV | Negative |
| Q8NJ73 | APAAAFGQAALWGQCGGQGW | Negative |
| Q8NJ73 | PAAAFGQAALWGQCGGQGW  | Negative |
| Q8NJ73 | ALWGQCGGQGWTGAKTCVSG | Negative |
| Q8NJ73 | QAALWGQCGGQGWTGAKTCV | Negative |
| Q8NJ73 | CGGQGWTGAKTCVSGAVCQA | Negative |
| Q8NKX2 | LISTISPIIKSDSKKDISNV | Negative |
| Q8NKX2 | SDSKKDISNVKSDLLYAYTI | Negative |
| Q8NKX2 | KKINIIKIVFIITVILISTI | Negative |
| Q8NKX2 | IITVILISTISPIIKSDSKK | Negative |
| Q8NKX2 | SPIIKSDSKKDISNVKSDLL | Negative |

|        |                       |          |
|--------|-----------------------|----------|
| Q8NKG2 | KSDSKKDISNVKSDLLYAYT  | Negative |
| Q8NKG2 | IKSDSKKDISNVKSDLLYAY  | Negative |
| Q8NKG2 | PIIKSDSKKDISNVKSDLLY  | Negative |
| Q8NKG2 | KINIIKIVFIITVILISTIS  | Negative |
| Q8NKG2 | ILISTISPIIKSDSKKDISN  | Negative |
| Q8NKG2 | IIKSDSKKDISNVKSDLLYA  | Negative |
| Q8NKG2 | NIKIVFIITVILISTISPI   | Negative |
| Q8NKG2 | VILISTISPIIKSDSKKDIS  | Negative |
| Q8NKG2 | DSKKDISNVKSDLLYAYTIT  | Negative |
| Q8NKG2 | STISPIIKSDSKKDISNVKS  | Negative |
| Q8NKG2 | INIIKIVFIITVILISTISP  | Negative |
| Q8NKG2 | TISPIIKSDSKKDISNVKSD  | Negative |
| Q8NKG2 | IKIVFIITVILISTISPIIK  | Negative |
| Q8NKG2 | KKDISNVKSDLLYAYTITPY  | Negative |
| Q8NKG2 | ISPIIKSDSKKDISNVKSDL  | Negative |
| Q8NKG2 | MKKINIIKIVFIITVILIST  | Negative |
| Q8NKG2 | KIVFIITVILISTISPIKS   | Negative |
| Q8NKG2 | IIKIVFIITVILISTISPII  | Negative |
| Q8NKG2 | ISTISPIIKSDSKKDISNVK  | Negative |
| Q8NKG2 | TVILISTISPIIKSDSKKDI  | Negative |
| Q8NKG2 | IVFIITVILISTISPIIKSD  | Negative |
| Q8NKG2 | SKKDISNVKSDLLYAYTITP  | Negative |
| Q8NKG2 | FIITVILISTISPIIKSDSK  | Negative |
| Q8NKG2 | VFIITVILISTISPIIKSDS  | Negative |
| Q8QG87 | MAVLLVGVEGNLWQFGKMMN  | Negative |
| Q8QG87 | GKMMNYVMGQSVVYKYFYFG  | Negative |
| Q8QG87 | QFGKMMNYVMGQSVVYKYFY  | Negative |
| Q8QG87 | AVLLVGVEGNLWQFGKMMNY  | Negative |
| Q8QG87 | LLVGVEGNLWQFGKMMNYVM  | Negative |
| Q8QG87 | VLLVGVEGNLWQFGKMMNYV  | Negative |
| Q8QG87 | WIMAVLLVGVEGNLWQFGKM  | Negative |
| Q8QG87 | FGKMMNYVMGQSVVYKYFYFG | Negative |
| Q8QG87 | GQSVVYKYFYFGCYCGWGGI  | Negative |
| Q8QG87 | TLWIMAVLLVGVEGNLWQFG  | Negative |
| Q8QG87 | VMGQSVVYKYFYFGCYCGWG  | Negative |
| Q8QG87 | NYVMGQSVVYKYFYFGCYCG  | Negative |
| Q8QG87 | MRTLWIMAVLLVGVEGNLWQ  | Negative |
| Q8QG87 | LWIMAVLLVGVEGNLWQFGK  | Negative |
| Q8QG87 | EGNLWQFGKMMNYVMGQSVV  | Negative |
| Q8QG87 | WQFGKMMNYVMGQSVVYKYF  | Negative |
| Q8QG87 | KMMNYVMGQSVVYKYFYFGC  | Negative |
| Q8QG87 | YVMGQSVVYKYFYFGCYCGW  | Negative |
| Q8QG87 | VEGNLWQFGKMMNYVMGQSV  | Negative |
| Q8QG87 | IMAVLLVGVEGNLWQFGKMM  | Negative |
| Q8QG87 | GNLWQFGKMMNYVMGQSVVY  | Negative |
| Q8QG87 | MNYVMGQSVVYKYFYFGCYC  | Negative |



|        |                       |          |
|--------|-----------------------|----------|
| Q8QG87 | LVGVEGNLWQFGKMMNYVMG  | Negative |
| Q8QG87 | GVEGNLWQFGKMMNYVMGQS  | Negative |
| Q8QG87 | VGVEGNLWQFGKMMNYVMGQ  | Negative |
| Q8QG87 | MGQSVVYKYFYGYGCYCGWGG | Negative |
| Q8QG87 | NLWQFGKMMNYVMGQSVVYK  | Negative |
| Q8QG87 | MMNYVMGQSVVYKYFYGYGCY | Negative |
| Q8QG87 | LWQFGKMMNYVMGQSVVYKY  | Negative |
| Q8QGR0 | DLGYTLTCVKSNSIWFTSE   | Negative |
| Q8QGR0 | VKSNSIWFTSEDCPDGQNL   | Negative |
| Q8QGR0 | IVCLDLGYTLTCVKSNSIWF  | Negative |
| Q8QGR0 | LVVVTIVCLDLGYTLTCVKS  | Negative |
| Q8QGR0 | KSNSIWFTSEDCPDGQNL    | Negative |
| Q8QGR0 | LLLTLVVVTIVCLDLGYTLT  | Negative |
| Q8QGR0 | IWFPTSEDCPDGQNLCKFRW  | Negative |
| Q8QGR0 | YTLTCVKSNSIWFTSEDCP   | Negative |
| Q8QGR0 | VTIVCLDLGYTLTCVKSNSI  | Negative |
| Q8QGR0 | MKTLLLTLVVVTIVCLDLGY  | Negative |
| Q8QGR0 | LGTYLTCVKSNSIWFTSED   | Negative |
| Q8QGR0 | VCLDLGYTLTCVKSNSIWFP  | Negative |
| Q8QGR0 | TLTCVKSNSIWFTSEDCPD   | Negative |
| Q8QGR0 | NSIWFTSEDCPDGQNLCKF   | Negative |
| Q8QGR0 | CVKSNSIWFTSEDCPDGQN   | Negative |
| Q8QGR0 | KTLLLTLVVVTIVCLDLGYT  | Negative |
| Q8QGR0 | TIVCLDLGYTLTCVKSNSIW  | Negative |
| Q8QGR0 | LLTLVVVTIVCLDLGYTLTC  | Negative |
| Q8QGR0 | SNSIWFTSEDCPDGQNL     | Negative |
| Q8QGR0 | TLLLTLVVVTIVCLDLGYTL  | Negative |
| Q8QGR0 | SIWFPTSEDCPDGQNLCKFR  | Negative |
| Q8QGR0 | LDLGYTLTCVKSNSIWFTS   | Negative |
| Q8QGR0 | TCVKSNSIWFTSEDCPDGQ   | Negative |
| Q8QGR0 | VVTIVCLDLGYTLTCVKSNS  | Negative |
| Q8QGR0 | CLDLGYTLTCVKSNSIWFT   | Negative |
| Q8QGR0 | LTLVVVTIVCLDLGYTLTCV  | Negative |
| Q8QGR0 | GYTLTCVKSNSIWFTSEDC   | Negative |
| Q8QGR0 | LTCVKSNSIWFTSEDCPDG   | Negative |
| Q8QGR0 | VVVTIVCLDLGYTLTCVKS   | Negative |
| Q8RJP2 | FVLPLTATGAVKLTLDGMS   | Negative |
| Q8RJP2 | GAVKLTLDGMSSTLDNGLL   | Negative |
| Q8RJP2 | WRTPLLTLIFVLPLTATGAV  | Negative |
| Q8RJP2 | MNKPLQAWRTPLLTLIFVL   | Negative |
| Q8RJP2 | LTATGAVKLTLDGMSSTLDN  | Negative |
| Q8RJP2 | MHMKPLQAWRTPLLTLIFV   | Negative |
| Q8RJP2 | LTLIFVLPLTATGAVKLTL   | Negative |
| Q8RJP2 | IFVLPLTATGAVKLTLDGMS  | Negative |
| Q8RJP2 | TPLLTLIFVLPLTATGAVKL  | Negative |
| Q8RJP2 | VLPLTATGAVKLTLDGMSST  | Negative |

|        |                      |          |
|--------|----------------------|----------|
| Q8RJP2 | NKPLQAWRTPLLTLIFVLPL | Negative |
| Q8RJP2 | TATGAVKLTLDGMNSTLDNG | Negative |
| Q8RJP2 | QAWRTPLLTLIFVLPLTATG | Negative |
| Q8RJP2 | LPLTATGAVKLTLDGMNSTL | Negative |
| Q8RJP2 | AVKLTLDGMNSTLDNGLLKV | Negative |
| Q8RJP2 | VKLTLDGMNSTLDNGLLKVR | Negative |
| Q8RJP2 | PLTATGAVKLTLDGMNSTLD | Negative |
| Q8RJP2 | KLTLDGMNSTLDNGLLKVRF | Negative |
| Q8RJP2 | TLIFVLPLTATGAVKLTLDG | Negative |
| Q8RJP2 | LLTLIFVLPLTATGAVKLTL | Negative |
| Q8RJP2 | LIFVLPLTATGAVKLTLDGM | Negative |
| Q8RJP2 | LQAWRTPLLTLIFVLPLTAT | Negative |
| Q8RJP2 | ATGAVKLTLDGMNSTLDNGL | Negative |
| Q8RJP2 | KPLQAWRTPLLTLIFVLPLT | Negative |
| Q8RJP2 | RTPLLTLIFVLPLTATGAVK | Negative |
| Q8RJP2 | TGAVKLTLDGMNSTLDNGLL | Negative |
| Q8RJP2 | PLQAWRTPLLTLIFVLPLTA | Negative |
| Q8RJP2 | AWRTPLLTLIFVLPLTATGA | Negative |
| Q8RJP2 | HMNKPLQAWRTPLLTLIFVL | Negative |
| Q8RLX0 | KKTIQRGLFTGALVLLTAMT | Negative |
| Q8RLX0 | TSKPAHAAVNYQALVDADV  | Negative |
| Q8RLX0 | VLLTAMTSKPAHAAVNYQAL | Negative |
| Q8RLX0 | KTIQRGLFTGALVLLTAMTS | Negative |
| Q8RLX0 | PAHAAVNYQALVDADVKKFQ | Negative |
| Q8RLX0 | AVNYQALVDADVKKFQGYFL | Negative |
| Q8RLX0 | MKKTIQRGLFTGALVLLTAM | Negative |
| Q8RLX0 | FTGALVLLTAMTSKPAHAAV | Negative |
| Q8RLX0 | ALVLLTAMTSKPAHAAVNYQ | Negative |
| Q8RLX0 | QRGLFTGALVLLTAMTSKPA | Negative |
| Q8RLX0 | AAVNYQALVDADVKKFQGYF | Negative |
| Q8RLX0 | MTSKPAHAAVNYQALVDADV | Negative |
| Q8RLX0 | LTAMTSKPAHAAVNYQALVD | Negative |
| Q8RLX0 | TIQRGLFTGALVLLTAMTSK | Negative |
| Q8RLX0 | LLTAMTSKPAHAAVNYQALV | Negative |
| Q8RLX0 | HAAVNYQALVDADVKKFQGY | Negative |
| Q8RLX0 | NYQALVDADVKKFQGYFLKE | Negative |
| Q8RLX0 | KPAHAAVNYQALVDADVKKF | Negative |
| Q8RLX0 | SKPAHAAVNYQALVDADVKK | Negative |
| Q8RLX0 | AHAAVNYQALVDADVKKFQG | Negative |
| Q8RLX0 | VNYQALVDADVKKFQGYFLK | Negative |
| Q8RLX0 | GALVLLTAMTSKPAHAAVNY | Negative |
| Q8RLX0 | TGALVLLTAMTSKPAHAAVN | Negative |
| Q8RLX0 | AMTSKPAHAAVNYQALVDAD | Negative |
| Q8RLX0 | TAMTSKPAHAAVNYQALVDA | Negative |
| Q8RLX0 | LFTGALVLLTAMTSKPAHAA | Negative |
| Q8RLX0 | GLFTGALVLLTAMTSKPAHA | Negative |

|        |                        |          |
|--------|------------------------|----------|
| Q8RLX0 | RGLFTGALVLLTAMTSKPAH   | Negative |
| Q8RLX0 | IQRGLFTGALVLLTAMTSKP   | Negative |
| Q8RS40 | DGKLVPNEGVLVSVGQDVDS   | Negative |
| Q8RS40 | MKKLAKMISIATLGACAFSA   | Negative |
| Q8RS40 | AKMISIATLGACAFSAHALD   | Negative |
| Q8RS40 | SIATLGACAFSAHALDGKLV   | Negative |
| Q8RS40 | FSAHALDGKLVPNEGVLVSV   | Negative |
| Q8RS40 | IATLGACAFSAHALDGKLP    | Negative |
| Q8RS40 | KKLAKMISIATLGACAFSAH   | Negative |
| Q8RS40 | SAHALDGKLVPNEGVLVSVG   | Negative |
| Q8RS40 | PNEGVLVSVGQDVDSVNDYS   | Negative |
| Q8RS40 | NEGVLVSVGQDVDSVNDYSS   | Negative |
| Q8RS40 | KLAKMISIATLGACAFSAHA   | Negative |
| Q8RS40 | LGACAFSAHALDGKLVPNEG   | Negative |
| Q8RS40 | AHALDGKLVPNEGVLVSVGQ   | Negative |
| Q8RS40 | LVPNEGVLVSVGQDVDSVND   | Negative |
| Q8RS40 | TLGACAFSAHALDGKLPNE    | Negative |
| Q8RS40 | KLVPNEGVLVSVGQDVDSVN   | Negative |
| Q8RS40 | AFSAHALDGKLVPNEGVLVS   | Negative |
| Q8RS40 | GKLVPNEGVLVSVGQDVDSV   | Negative |
| Q8RS40 | CAFSAHALDGKLVPNEGVLV   | Negative |
| Q8RS40 | LDGKLVPNEGVLVSVGQDVD   | Negative |
| Q8RS40 | LAKMISIATLGACAFSAHAL   | Negative |
| Q8RS40 | HALDGKLVPNEGVLVSVGQD   | Negative |
| Q8RS40 | ALDGKLVPNEGVLVSVGQDV   | Negative |
| Q8RS40 | ATLGACAFSAHALDGKLPN    | Negative |
| Q8RS40 | ACAFSAHALDGKLVPNEGVL   | Negative |
| Q8RS40 | GACAFSAHALDGKLVPNEGV   | Negative |
| Q8RS40 | KMISIATLGACAFSAHALDG   | Negative |
| Q8RS40 | VPNEGVLVSVGQDVDSVNDY   | Negative |
| Q8RS40 | MISIATLGACAFSAHALDGK   | Negative |
| Q8RUW5 | MSLKIKFLLLLVLYHHVDSA   | Negative |
| Q8RUW5 | LKIKFLLLLVLYHHVDSASI   | Negative |
| Q8RUW5 | SASIVKFLPGFEGPLPFELE   | Negative |
| Q8RUW5 | VKFLPGFEGPLPFELETGYI   | Negative |
| Q8RUW5 | KFLLLLVLYHHVDSASIVKF   | Negative |
| Q8RUW5 | LPGFEGPLPFELETGYIGIG   | Negative |
| Q8RUW5 | PGFEGPLPFELETGYIGIGE   | Negative |
| Q8RUW5 | VLYHHVDSASIVKFLPGFEG   | Negative |
| Q8RUW5 | LLLVLVLYHHVDSASIVKFLPG | Negative |
| Q8RUW5 | LLLLVLVLYHHVDSASIVKFLP | Negative |
| Q8RUW5 | LVLYHHVDSASIVKFLPGFE   | Negative |
| Q8RUW5 | IVKFLPGFEGPLPFELETGY   | Negative |
| Q8RUW5 | SLKIKFLLLLVLYHHVDSAS   | Negative |
| Q8RUW5 | VDSASIVKFLPGFEGPLPFE   | Negative |
| Q8RUW5 | KFLPGFEGPLPFELETGYIG   | Negative |

|        |                      |          |
|--------|----------------------|----------|
| Q8RUW5 | LLVLYHHVDSASIVKFLPGF | Negative |
| Q8RUW5 | KIKFLLLLVLYHHVDSASIV | Negative |
| Q8RUW5 | LYHHVDSASIVKFLPGFEGP | Negative |
| Q8RUW5 | EGPLPFELETGYIGIGEDEN | Negative |
| Q8RUW5 | YHHVDSASIVKFLPGFEGPL | Negative |
| Q8RUW5 | DSASIVKFLPGFEGPLPFEL | Negative |
| Q8RUW5 | HHVDSASIVKFLPGFEGPLP | Negative |
| Q8RUW5 | SIVKFLPGFEGPLPFELETG | Negative |
| Q8RUW5 | FLLLLVLYHHVDSASIVKFL | Negative |
| Q8RUW5 | FEGPLPFELETGYIGIGEDE | Negative |
| Q8RUW5 | ASIVKFLPGFEGPLPFELET | Negative |
| Q8RUW5 | GFEGPLPFELETGYIGIGED | Negative |
| Q8RUW5 | FLPGFEGPLPFELETGYIGI | Negative |
| Q8RUW5 | HVDSASIVKFLPGFEGPLPF | Negative |
| Q8RVH5 | HYFLALSLSFSFLFFLSDSV | Negative |
| Q8RVH5 | DSVPIQHTNPTKPINLLV   | Negative |
| Q8RVH5 | FLALSLSFSFLFFLSDSVPI | Negative |
| Q8RVH5 | LHYFLALSLSFSFLFFLSDS | Negative |
| Q8RVH5 | FSFLFFLSDSVPIQHTNP   | Negative |
| Q8RVH5 | PIQHTNPTKPINLLVLPV   | Negative |
| Q8RVH5 | PQHTNPTKPINLLVLPVQN  | Negative |
| Q8RVH5 | LSLSFSFLFFLSDSVPIQH  | Negative |
| Q8RVH5 | LFFLSDSVPIQHTNPTKP   | Negative |
| Q8RVH5 | LSFSFLFFLSDSVPIQHHT  | Negative |
| Q8RVH5 | IPQHHTNPTKPINLLVLPVQ | Negative |
| Q8RVH5 | FLSDSVPIQHTNPTKPIN   | Negative |
| Q8RVH5 | YFLALSLSFSFLFFLSDSV  | Negative |
| Q8RVH5 | SDSVPIQHTNPTKPINLL   | Negative |
| Q8RVH5 | SVPIQHTNPTKPINLLVL   | Negative |
| Q8RVH5 | QHHTNPTKPINLLVLPVQND | Negative |
| Q8RVH5 | LSDSVPIQHTNPTKPINL   | Negative |
| Q8RVH5 | MASILHYFLALSLSFSFLFF | Negative |
| Q8RVH5 | SLSFSFLFFLSDSVPIQHH  | Negative |
| Q8RVH5 | LALSLSFSFLFFLSDSVPI  | Negative |
| Q8RVH5 | VPIQHTNPTKPINLLVLP   | Negative |
| Q8RVH5 | SFLFFLSDSVPIQHTNPT   | Negative |
| Q8RVH5 | ASILHYFLALSLSFSFLFFL | Negative |
| Q8RVH5 | SILHYFLALSLSFSFLFFLS | Negative |
| Q8RVH5 | ILHYFLALSLSFSFLFFLSD | Negative |
| Q8RVH5 | HHTNPTKPINLLVLPVQNDA | Negative |
| Q8RVH5 | FLFFLSDSVPIQHTNPTK   | Negative |
| Q8RVH5 | FFLSDSVPIQHTNPTKPI   | Negative |
| Q8RVH5 | SFSFLFFLSDSVPIQHHTN  | Negative |
| Q8SPQ0 | ASGTGFVVLVLLQSCAAYKL | Negative |
| Q8SPQ0 | LICYTSWSQYREGDGSCFP  | Negative |
| Q8SPQ0 | CYYTSWSQYREGDGSCFPDA | Negative |

|        |                      |          |
|--------|----------------------|----------|
| Q8SPQ0 | KLICYTWSQYREGDGSCF   | Negative |
| Q8SPQ0 | AYKLICYTWSQYREGDGS   | Negative |
| Q8SPQ0 | YYTWSQYREGDGSCFPDAI  | Negative |
| Q8SPQ0 | TGFVVLVLLQSCAAYKLICY | Negative |
| Q8SPQ0 | LLQSCAAYKLICYTWSQY   | Negative |
| Q8SPQ0 | SGTGFVVLVLLQSCAAYKLI | Negative |
| Q8SPQ0 | LVLQSCAAYKLICYTWS    | Negative |
| Q8SPQ0 | LQSCAAYKLICYTWSQYR   | Negative |
| Q8SPQ0 | QSCAAYKLICYTWSQYRE   | Negative |
| Q8SPQ0 | VLVLLQSCAAYKLICYTSW  | Negative |
| Q8SPQ0 | GFVVLVLLQSCAAYKLICY  | Negative |
| Q8SPQ0 | RASGTGFVVLVLLQSCAAYK | Negative |
| Q8SPQ0 | SCAAYKLICYTWSQYREG   | Negative |
| Q8SPQ0 | CAAYKLICYTWSQYREGD   | Negative |
| Q8SPQ0 | AAYLICYTWSQYREGDG    | Negative |
| Q8SPQ0 | TWSQYREGDGSCFPDAIDP  | Negative |
| Q8SPQ0 | FVVLVLLQSCAAYKLICYT  | Negative |
| Q8SPQ0 | MGLRASGTGFVVLVLLQSCA | Negative |
| Q8SPQ0 | VLLQSCAAYKLICYTWSQ   | Negative |
| Q8SPQ0 | ICYTWSQYREGDGSCFPD   | Negative |
| Q8SPQ0 | LRASGTGFVVLVLLQSCAAY | Negative |
| Q8SPQ0 | SWSQYREGDGSCFPDAIDPF | Negative |
| Q8SPQ0 | YTWSQYREGDGSCFPDAID  | Negative |
| Q8SPQ0 | VVLVLLQSCAAYKLICYTS  | Negative |
| Q8SPQ0 | GLRASGTGFVVLVLLQSCAA | Negative |
| Q8SPQ0 | YKLICYTWSQYREGDGSC   | Negative |
| Q8SXL2 | TVVLAAQQSQAKKGCQAYGH | Negative |
| Q8SXL2 | ISLLVVICTVVLAAQQSQA  | Negative |
| Q8SXL2 | CQAYGHVCYGGHGKRSLSPG | Negative |
| Q8SXL2 | VICTVVLAAQQSQAKKGCQA | Negative |
| Q8SXL2 | CTVVLAAQQSQAKKGCQAYG | Negative |
| Q8SXL2 | QSQAKKGCQAYGHVCYGGHG | Negative |
| Q8SXL2 | AAQQSQAKKGCQAYGHVCYG | Negative |
| Q8SXL2 | STISLLVVICTVVLAAQQS  | Negative |
| Q8SXL2 | AYGHVCYGGHGKRSLSPGSG | Negative |
| Q8SXL2 | QAYGHVCYGGHGKRSLSPGS | Negative |
| Q8SXL2 | MKSTISLLVVICTVVLAAQ  | Negative |
| Q8SXL2 | LLVVICTVVLAAQQSQAKKG | Negative |
| Q8SXL2 | AKKGCQAYGHVCYGGHGKRS | Negative |
| Q8SXL2 | LAAQQSQAKKGCQAYGHVCY | Negative |
| Q8SXL2 | SLLVVICTVVLAAQQSQAK  | Negative |
| Q8SXL2 | GCQAYGHVCYGGHGKRSLSP | Negative |
| Q8SXL2 | ICTVVLAAQQSQAKKGCQAY | Negative |
| Q8SXL2 | QQSQAKKGCQAYGHVCYGGH | Negative |
| Q8SXL2 | TISLLVVICTVVLAAQQSQ  | Negative |
| Q8SXL2 | AQQSQAKKGCQAYGHVCYGG | Negative |

|        |                       |          |
|--------|-----------------------|----------|
| Q8SXL2 | KKGCQAYGHVCYGGHGKRSLS | Negative |
| Q8SXL2 | KSTISLLL VVICTVVLAAQQ | Negative |
| Q8SXL2 | VVLAAQQSQAKKGCQAYGHV  | Negative |
| Q8SXL2 | VLAAQQSQAKKGCQAYGHVC  | Negative |
| Q8SXL2 | QAKKGCQAYGHVCYGGHGKR  | Negative |
| Q8SXL2 | LLL VVICTVVLAAQQSQAKK | Negative |
| Q8SXL2 | SQAKKGCQAYGHVCYGGHGK  | Negative |
| Q8SXL2 | KGCQAYGHVCYGGHGKRSLS  | Negative |
| Q8SXL2 | LVVICTVVLAAQQSQAKKGC  | Negative |
| Q8T0W0 | LIVVVVAANLCEASDCGPNR  | Negative |
| Q8T0W0 | GPNRVYKSCGTGCPETCENP  | Negative |
| Q8T0W0 | VVAANLCEASDCGPNRVYKS  | Negative |
| Q8T0W0 | SR YALIVLIVVVVAANLCEA | Negative |
| Q8T0W0 | RYALIVLIVVVVAANLCEAS  | Negative |
| Q8T0W0 | YKSCGTGCPETCENPDPDCD  | Negative |
| Q8T0W0 | EASDCGPNRVYKSCGTGCPE  | Negative |
| Q8T0W0 | CEASDCGPNRVYKSCGTGCP  | Negative |
| Q8T0W0 | CGPNRVYKSCGTGCPETCEN  | Negative |
| Q8T0W0 | NLCEASDCGPNRVYKSCGTG  | Negative |
| Q8T0W0 | DCGPNRVYKSCGTGCPETCE  | Negative |
| Q8T0W0 | VYKSCGTGCPETCENPDPDC  | Negative |
| Q8T0W0 | LIVLIVVVVAANLCEASDCG  | Negative |
| Q8T0W0 | MSRYALIVLIVVVVAANLCE  | Negative |
| Q8T0W0 | ANLCEASDCGPNRVYKSCGT  | Negative |
| Q8T0W0 | VAANLCEASDCGPNRVYKSC  | Negative |
| Q8T0W0 | YALIVLIVVVVAANLCEASD  | Negative |
| Q8T0W0 | SDCGPNRVYKSCGTGCPETC  | Negative |
| Q8T0W0 | PNRVYKSCGTGCPETCENPD  | Negative |
| Q8T0W0 | VVVAANLCEASDCGPNRVYK  | Negative |
| Q8T0W0 | RVYKSCGTGCPETCENPDPD  | Negative |
| Q8T0W0 | ASDCGPNRVYKSCGTGCPET  | Negative |
| Q8T0W0 | AANLCEASDCGPNRVYKSCG  | Negative |
| Q8T0W0 | NRVYKSCGTGCPETCENPDP  | Negative |
| Q8T0W0 | IVVVVAANLCEASDCGPNRV  | Negative |
| Q8T0W0 | LCEASDCGPNRVYKSCGTGC  | Negative |
| Q8T0W0 | VVVVAANLCEASDCGPNRVY  | Negative |
| Q8T0W0 | VLIVVVVAANLCEASDCGPN  | Negative |
| Q8T0W0 | ALIVLIVVVVAANLCEASDC  | Negative |
| Q8T0W2 | FLACALLV VATAHAATAIVN | Negative |
| Q8T0W2 | VVATAHAATAIVNPETCEIG  | Negative |
| Q8T0W2 | MGFLACALLV VATAHAATAI | Negative |
| Q8T0W2 | LVVATAHAATAIVNPETCEI  | Negative |
| Q8T0W2 | TCEIGSNFKNYCNNCYCFDG  | Negative |
| Q8T0W2 | CEIGSNFKNYCNNCYCFDGV  | Negative |
| Q8T0W2 | NPETCEIGSNFKNYCNNCYC  | Negative |
| Q8T0W2 | GSNFKNYCNNCYCFDGVMDH  | Negative |

|        |                       |          |
|--------|-----------------------|----------|
| Q8T0W2 | HAATAIVNPETCEIGSNFKN  | Negative |
| Q8T0W2 | VNPETCEIGSNFKNYCNCY   | Negative |
| Q8T0W2 | AIVNPETCEIGSNFKNYCNN  | Negative |
| Q8T0W2 | CALLVVATAHAATAIVNPET  | Negative |
| Q8T0W2 | ETCEIGSNFKNYCNCYCFD   | Negative |
| Q8T0W2 | LACALLVVATAHAATAIVNP  | Negative |
| Q8T0W2 | EIGSNFKNYCNCYCFDGVM   | Negative |
| Q8T0W2 | AHAATAIVNPETCEIGSNFK  | Negative |
| Q8T0W2 | PETCEIGSNFKNYCNCYCF   | Negative |
| Q8T0W2 | ATAHAATAIVNPETCEIGSN  | Negative |
| Q8T0W2 | LLVVATAHAATAIVNPETCE  | Negative |
| Q8T0W2 | TAHAATAIVNPETCEIGSNF  | Negative |
| Q8T0W2 | ALLVVATAHAATAIVNPETC  | Negative |
| Q8T0W2 | IGSNFKNYCNCYCFDGVMD   | Negative |
| Q8T0W2 | ATAIVNPETCEIGSNFKNYC  | Negative |
| Q8T0W2 | TAIVNPETCEIGSNFKNYCN  | Negative |
| Q8T0W2 | GFLACALLVVATAHAATAIV  | Negative |
| Q8T0W2 | IVNPETCEIGSNFKNYCNC   | Negative |
| Q8T0W2 | VATAHAATAIVNPETCEIGS  | Negative |
| Q8T0W2 | AATAIVNPETCEIGSNFKNY  | Negative |
| Q8T0W2 | SNFKNYCNCYCFDGVMDHA   | Negative |
| Q8T0W5 | VVVVVATNLSEANIFDVPTC  | Negative |
| Q8T0W5 | NLSEANIFDVPTCEPNRIYK  | Negative |
| Q8T0W5 | LSEANIFDVPTCEPNRIYKT  | Negative |
| Q8T0W5 | LVVVVVATNLSEANIFDVPT  | Negative |
| Q8T0W5 | SEANIFDVPTCEPNRIYKTC  | Negative |
| Q8T0W5 | ATNLSEANIFDVPTCEPNRI  | Negative |
| Q8T0W5 | VATNLSEANIFDVPTCEPNR  | Negative |
| Q8T0W5 | TCEPNRIYKTCGPACPPTCE  | Negative |
| Q8T0W5 | MCRYALIVLVVVVVATNLSE  | Negative |
| Q8T0W5 | VVATNLSEANIFDVPTCEPN  | Negative |
| Q8T0W5 | VVVATNLSEANIFDVPTCEP  | Negative |
| Q8T0W5 | VPTCEPNRIYKTCGPACPPT  | Negative |
| Q8T0W5 | ANIFDVPTCEPNRIYKTCGP  | Negative |
| Q8T0W5 | VVVVATNLSEANIFDVPTCE  | Negative |
| Q8T0W5 | CEPNRIYKTCGPACPPTCED  | Negative |
| Q8T0W5 | CRYALIVLVVVVVATNLSEA  | Negative |
| Q8T0W5 | TNLSEANIFDVPTCEPNRIY  | Negative |
| Q8T0W5 | EANIFDVPTCEPNRIYKTCG  | Negative |
| Q8T0W5 | RYALIVLVVVVVATNLSEAN  | Negative |
| Q8T0W5 | LIVLVVVVVATNLSEANIFD  | Negative |
| Q8T0W5 | FDVPTCEPNRIYKTCGPACP  | Negative |
| Q8T0W5 | PTCEPNRIYKTCGPACPPTC  | Negative |
| Q8T0W5 | IFDVPTCEPNRIYKTCGPAC  | Negative |
| Q8T0W5 | VLVVVVVVATNLSEANIFDVP | Negative |
| Q8T0W5 | DVPTCEPNRIYKTCGPACPP  | Negative |

|        |                      |          |
|--------|----------------------|----------|
| Q8T0W5 | ALIVLVVVVVATNLSEANIF | Negative |
| Q8T0W5 | NIFDVPTCEPNRIYKTCGPA | Negative |
| Q8T0W5 | YALIVLVVVVVATNLSEANI | Negative |
| Q8T0W5 | EPNRIYKTCGPACPTCEDP  | Negative |
| Q8T0W8 | MIATTEAAVRIGPCDQVCPR | Negative |
| Q8T0W8 | CAMIATTEAAVRIGPCDQVC | Negative |
| Q8T0W8 | LLIVACAMIATTEAAVRIGP | Negative |
| Q8T0W8 | LIVACAMIATTEAAVRIGPC | Negative |
| Q8T0W8 | AMIATTEAAVRIGPCDQVCP | Negative |
| Q8T0W8 | IVACAMIATTEAAVRIGPCD | Negative |
| Q8T0W8 | TIFLLIVACAMIATTEAAVR | Negative |
| Q8T0W8 | MGAALKMTIFLLIVACAMIA | Negative |
| Q8T0W8 | MTIFLLIVACAMIATTEAAV | Negative |
| Q8T0W8 | ACAMIATTEAAVRIGPCDQV | Negative |
| Q8T0W8 | VACAMIATTEAAVRIGPCDQ | Negative |
| Q8T0W8 | AALKMTIFLLIVACAMIATT | Negative |
| Q8T0W8 | ALKMTIFLLIVACAMIATTE | Negative |
| Q8T0W8 | AVRIGPCDQVCPRIVPERHE | Negative |
| Q8T0W8 | EAAVRIGPCDQVCPRIVPER | Negative |
| Q8T0W8 | VRIGPCDQVCPRIVPERHEC | Negative |
| Q8T0W8 | AAVRIGPCDQVCPRIVPERH | Negative |
| Q8T0W8 | RIGPCDQVCPRIVPERHECC | Negative |
| Q8T0W8 | TTEAAVRIGPCDQVCPRIVP | Negative |
| Q8T0W8 | KMTIFLLIVACAMIATTEAA | Negative |
| Q8T0W8 | IATTEAAVRIGPCDQVCPRI | Negative |
| Q8T0W8 | GPCDQVCPRIVPERHECCRA | Negative |
| Q8T0W8 | GAALKMTIFLLIVACAMIAT | Negative |
| Q8T0W8 | TEAAVRIGPCDQVCPRIVPE | Negative |
| Q8T0W8 | IFLLIVACAMIATTEAAVRI | Negative |
| Q8T0W8 | LKMTIFLLIVACAMIATTEA | Negative |
| Q8T0W8 | IGPCDQVCPRIVPERHECCR | Negative |
| Q8T0W8 | PCDQVCPRIVPERHECCRAH | Negative |
| Q8T0W8 | ATTEAAVRIGPCDQVCPRIV | Negative |
| Q8T0Y7 | SRICTSFARLMASALCVSTL | Negative |
| Q8T0Y7 | LVTAMPFDLRRGSSDSDL   | Negative |
| Q8T0Y7 | FDLRRGSSDSDLQGHVDL   | Negative |
| Q8T0Y7 | LLVTAMPFDLRRGSSDSDL  | Negative |
| Q8T0Y7 | AMPFDLRRGSSDSDLQGH   | Negative |
| Q8T0Y7 | FARLMASALCVSTLLVTAMP | Negative |
| Q8T0Y7 | MDSRICTSFARLMASALCVS | Negative |
| Q8T0Y7 | VSTLLVTAMPFDLRRGSSDT | Negative |
| Q8T0Y7 | DLRRGSSDSDLQGHVDLG   | Negative |
| Q8T0Y7 | ARLMASALCVSTLLVTAMPF | Negative |
| Q8T0Y7 | CVSTLLVTAMPFDLRRGSSD | Negative |
| Q8T0Y7 | PFDLRRGSSDSDLQGHVD   | Negative |
| Q8T0Y7 | ICTSFARLMASALCVSTLLV | Negative |



|        |                       |          |
|--------|-----------------------|----------|
| Q8T0Y7 | ASALCVSTLLVTAMPFDLRR  | Negative |
| Q8T0Y7 | RLMASALCVSTLLVTAMPFD  | Negative |
| Q8T0Y7 | TAMPFDLRRGSSDSDLQ     | Negative |
| Q8T0Y7 | SFARLMASALCVSTLLVTAM  | Negative |
| Q8T0Y7 | MASALCVSTLLVTAMPFDLR  | Negative |
| Q8T0Y7 | VTAMPFDLRRGSSDSDLQ    | Negative |
| Q8T0Y7 | TSFARLMASALCVSTLLVTA  | Negative |
| Q8T0Y7 | MPFDLRRGSSDSDLQGHV    | Negative |
| Q8T0Y7 | LCVSTLLVTAMPFDLRRGSS  | Negative |
| Q8T0Y7 | ALCVSTLLVTAMPFDLRRGS  | Negative |
| Q8T0Y7 | STLLVTAMPFDLRRGSSDTD  | Negative |
| Q8T0Y7 | TLLVTAMPFDLRRGSSDSDL  | Negative |
| Q8T0Y7 | DSRICTSFARLMASALCVST  | Negative |
| Q8T0Y7 | RICTSFARLMASALCVSTLL  | Negative |
| Q8T0Y7 | SALCVSTLLVTAMPFDLRRG  | Negative |
| Q8T0Y7 | CTSFARLMASALCVSTLLVT  | Negative |
| Q8T113 | ITAVVTSQCTKNNNAEDKVPE | Negative |
| Q8T113 | TAVVTSQCTKNNNAEDKVPEV | Negative |
| Q8T113 | SQCTKNNNAEDKVPEVEAALR | Negative |
| Q8T113 | LADDFSQITAVVTSQCTKNN  | Negative |
| Q8T113 | AVVTSQCTKNNNAEDKVPEVE | Negative |
| Q8T113 | TVLITIFAAGVLADDFSQIT  | Negative |
| Q8T113 | ADDFSQITAVVTSQCTKNNNA | Negative |
| Q8T113 | VLITIFAAGVLADDFSQITA  | Negative |
| Q8T113 | QITAVVTSQCTKNNNAEDKVP | Negative |
| Q8T113 | QCTKNNNAEDKVPEVEAALRT | Negative |
| Q8T113 | DFSQITAVVTSQCTKNNNAED | Negative |
| Q8T113 | AAGVLADDFSQITAVVTSQC  | Negative |
| Q8T113 | IFAAGVLADDFSQITAVVTS  | Negative |
| Q8T113 | SQITAVVTSQCTKNNNAEDKV | Negative |
| Q8T113 | KTVLITIFAAGVLADDFSQI  | Negative |
| Q8T113 | TIFAAGVLADDFSQITAVVT  | Negative |
| Q8T113 | VTSQCTKNNNAEDKVPEVEAA | Negative |
| Q8T113 | LITIFAAGVLADDFSQITAV  | Negative |
| Q8T113 | FSQITAVVTSQCTKNNNAEDK | Negative |
| Q8T113 | MMWKTVLITIFAAGVLADDF  | Negative |
| Q8T113 | TSQCTKNNNAEDKVPEVEAAL | Negative |
| Q8T113 | VLADDFSQITAVVTSQCTKN  | Negative |
| Q8T113 | AGVLADDFSQITAVVTSQCT  | Negative |
| Q8T113 | DDFSQITAVVTSQCTKNNAE  | Negative |
| Q8T113 | VVTSQCTKNNNAEDKVPEVEA | Negative |
| Q8T113 | FAAGVLADDFSQITAVVTSQ  | Negative |
| Q8T113 | GVLADDFSQITAVVTSQCTK  | Negative |
| Q8T113 | MWKTVLITIFAAGVLADDFS  | Negative |
| Q8T113 | ITIFAAGVLADDFSQITAVV  | Negative |
| Q8T1G4 | RIAFFLLVLAHIIGFAYGYS  | Negative |

|        |                        |          |
|--------|------------------------|----------|
| Q8T1G4 | YGYSCP KPCYGNMCCSTSPN  | Negative |
| Q8T1G4 | AVIIGFAYGYSCP KPCYGNM  | Negative |
| Q8T1G4 | PCYGNMCCSTSPNNQYYLTD   | Negative |
| Q8T1G4 | IAFFLLVLA VIIGFAYGYSC  | Negative |
| Q8T1G4 | NMCCSTSPNNQYYLTDFCGS   | Negative |
| Q8T1G4 | YGNMCCSTSPNNQYYLTDFC   | Negative |
| Q8T1G4 | GFA YGYSCP KPCYGNMCCST | Negative |
| Q8T1G4 | IGFAYGYSCP KPCYGNMCCS  | Negative |
| Q8T1G4 | LVLAVIIGFAYGYSCP KPCY  | Negative |
| Q8T1G4 | SCP KPCYGNMCCSTSPNNQY  | Negative |
| Q8T1G4 | VLAVIIGFAYGYSCP KPCY G | Negative |
| Q8T1G4 | IIGFAYGYSCP KPCYGNMCC  | Negative |
| Q8T1G4 | AYGYSCP KPCYGNMCCSTSP  | Negative |
| Q8T1G4 | LLVLAVIIGFAYGYSCP KPC  | Negative |
| Q8T1G4 | KPCYGNMCCSTSPNNQYYLT   | Negative |
| Q8T1G4 | GNMCCSTSPNNQYYLTDFCG   | Negative |
| Q8T1G4 | MCCSTSPNNQYYLTDFCGST   | Negative |
| Q8T1G4 | FAYGYSCP KPCYGNMCCSTS  | Negative |
| Q8T1G4 | GYSCP KPCYGNMCCSTSPNN  | Negative |
| Q8T1G4 | CYGNMCCSTSPNNQYYLTDF   | Negative |
| Q8T1G4 | CPKPCYGNMCCSTSPNNQYY   | Negative |
| Q8T1G4 | AFFLLVLA VIIGFAYGYSCP  | Negative |
| Q8T1G4 | VIIGFAYGYSCP KPCYGNMC  | Negative |
| Q8T1G4 | PKPCYGNMCCSTSPNNQYYL   | Negative |
| Q8T1G4 | LAVIIGFAYGYSCP KPCYGN  | Negative |
| Q8T1G4 | MRIAFFLLVLA VIIGFAYGY  | Negative |
| Q8T1G4 | YSCP KPCYGNMCCSTSPNNQ  | Negative |
| Q8T1G4 | FLLVLA VIIGFAYGYSCP K  | Negative |
| Q8T635 | YLPPRPGNGFGGGAGSGGNA   | Negative |
| Q8T635 | LEPQYLPPRPGNGFGGGAGS   | Negative |
| Q8T635 | VGSCGRLEPQYLPPRPGNGF   | Negative |
| Q8T635 | CGRLEPQYLPPRPGNGFGGG   | Negative |
| Q8T635 | LIAVGSCGRLEPQYLPPRPG   | Negative |
| Q8T635 | EPQYLPPRPGNGFGGGAGSG   | Negative |
| Q8T635 | QYLPPRPGNGFGGGAGSGGN   | Negative |
| Q8T635 | TAVLIAVGSCGRLEPQYLPP   | Negative |
| Q8T635 | LPPRPGNGFGGGAGSGGNAG   | Negative |
| Q8T635 | PPRPGNGFGGGAGSGGNAGL   | Negative |
| Q8T635 | SCGRLEPQYLPPRPGNGFGG   | Negative |
| Q8T635 | LTAVLIAVGSCGRLEPQYLP   | Negative |
| Q8T635 | PRPGNGFGGGAGSGGNAGLG   | Negative |
| Q8T635 | RPGNGFGGGAGSGGNAGLGG   | Negative |
| Q8T635 | ATILLVLTAVLIAVGSCGRL   | Negative |
| Q8T635 | TILLVLTAVLIAVGSCGRLE   | Negative |
| Q8T635 | AVGSCGRLEPQYLPPRPGNG   | Negative |
| Q8T635 | MATILLVLTAVLIAVGSCGR   | Negative |

|        |                      |          |
|--------|----------------------|----------|
| Q8T635 | VLTAFLIAVGSCGRLEPQYL | Negative |
| Q8T635 | RLEPQYLPPRPGNGFGGGAG | Negative |
| Q8T635 | AVLIAVGSCGRLEPQYLPPR | Negative |
| Q8T635 | PGNGFGGGAGSGGNAGLGGG | Negative |
| Q8T635 | IAVGSCGRLEPQYLPPRPGN | Negative |
| Q8T635 | GRLEPQYLPPRPGNGFGGGA | Negative |
| Q8T635 | LVLTAFLIAVGSCGRLEPQY | Negative |
| Q8T635 | LLVLTAVLIAVGSCGRLEPQ | Negative |
| Q8T635 | PQYLPPRPGNGFGGGAGSGG | Negative |
| Q8T635 | GSCGRLEPQYLPPRPGNGFG | Negative |
| Q8T635 | VLIAVGSCGRLEPQYLPPRP | Negative |
| Q8T9R8 | YKYLVLVLVLCLSATQTE   | Negative |
| Q8T9R8 | RGFRKHFNKLVKVKHTISE  | Negative |
| Q8T9R8 | GFRKHFNKLVKVKHTISET  | Negative |
| Q8T9R8 | ARGFRKHFNKLVKVKHTIS  | Negative |
| Q8T9R8 | KHFNKLVKVKHTISETAHV  | Negative |
| Q8T9R8 | VVLVVLVLCLSATQTEARGF | Negative |
| Q8T9R8 | HFNKLVKVKHTISETAHVA  | Negative |
| Q8T9R8 | FRKHFNKLVKVKHTISETA  | Negative |
| Q8T9R8 | LSATQTEARGFRKHFNKLVK | Negative |
| Q8T9R8 | ATQTEARGFRKHFNKLVKKV | Negative |
| Q8T9R8 | LVVLVVLVLCLSATQTEARG | Negative |
| Q8T9R8 | FYKYLVLVLVLCLSATQT   | Negative |
| Q8T9R8 | RKHFNKLVKVKHTISETAH  | Negative |
| Q8T9R8 | NFYKYLVLVLVLCLSATQ   | Negative |
| Q8T9R8 | VLVLCLSATQTEARGFRKHF | Negative |
| Q8T9R8 | TEARGFRKHFNKLVKVKVHT | Negative |
| Q8T9R8 | EARGFRKHFNKLVKVKVHTI | Negative |
| Q8T9R8 | LVLCLSATQTEARGFRKHFN | Negative |
| Q8T9R8 | VLCLSATQTEARGFRKHFNK | Negative |
| Q8T9R8 | VLVLVLCLSATQTEARGFR  | Negative |
| Q8T9R8 | VVLVLCLSATQTEARGFRKH | Negative |
| Q8T9R8 | TQTEARGFRKHFNKLVKVKV | Negative |
| Q8T9R8 | YLVVLVLVLCLSATQTEAR  | Negative |
| Q8T9R8 | MNFYKYLVLVLVLCLSAT   | Negative |
| Q8T9R8 | LCLSATQTEARGFRKHFNKL | Negative |
| Q8T9R8 | QTEARGFRKHFNKLVKVKVH | Negative |
| Q8T9R8 | CLSATQTEARGFRKHFNKL  | Negative |
| Q8T9R8 | SATQTEARGFRKHFNKLVKK | Negative |
| Q8T9R8 | KYLVVLVLVLCLSATQTEA  | Negative |
| Q8TAL6 | LYPEMSNGTLHHYFVPDGDY | Negative |
| Q8TAL6 | FDGPLYPEMSNGTLHHYFVP | Negative |
| Q8TAL6 | YFDGPLYPEMSNGTLHHYFV | Negative |
| Q8TAL6 | HLCQGYFDGPLYPEMSNGTL | Negative |
| Q8TAL6 | QGYFDGPLYPEMSNGTLHHY | Negative |
| Q8TAL6 | MSNGTLHHYFVPDGDYEEND | Negative |

|        |                      |          |
|--------|----------------------|----------|
| Q8TAL6 | VFLKFFCMSFFCHLCQGYFD | Negative |
| Q8TAL6 | LCQGYFDGPLYPEMSNGTLH | Negative |
| Q8TAL6 | CHLCQGYFDGPLYPEMSNGT | Negative |
| Q8TAL6 | MSFFCHLCQGYFDGPLYPEM | Negative |
| Q8TAL6 | EMSNGTLHHYFVPDGDYEEN | Negative |
| Q8TAL6 | MVFLKFFCMSFFCHLCQGYF | Negative |
| Q8TAL6 | CMSFFCHLCQGYFDGPLYPE | Negative |
| Q8TAL6 | GYFDGPLYPEMSNGTLHHYF | Negative |
| Q8TAL6 | PEMSNGTLHHYFVPDGDYEE | Negative |
| Q8TAL6 | FFCHLCQGYFDGPLYPEMSN | Negative |
| Q8TAL6 | YPEMSNGTLHHYFVPDGDYE | Negative |
| Q8TAL6 | DGPLYPEMSNGTLHHYFVPD | Negative |
| Q8TAL6 | SNGTLHHYFVPDGDYEENDD | Negative |
| Q8TAL6 | CQGYFDGPLYPEMSNGTLHH | Negative |
| Q8TAL6 | KFFCMSFFCHLCQGYFDGPL | Negative |
| Q8TAL6 | GPLYPEMSNGTLHHYFVPDG | Negative |
| Q8TAL6 | FCMSFFCHLCQGYFDGPLYP | Negative |
| Q8TAL6 | FCHLCQGYFDGPLYPEMSNG | Negative |
| Q8TAL6 | PLYPEMSNGTLHHYFVPDGD | Negative |
| Q8TAL6 | SFFCHLCQGYFDGPLYPEMS | Negative |
| Q8TAL6 | NGTLHHYFVPDGDYEENDDP | Negative |
| Q8TAL6 | FFCMSFFCHLCQGYFDGPLY | Negative |
| Q8TAL6 | FLKFFCMSFFCHLCQGYFDG | Negative |
| Q8TD06 | NLAIAIKKEKRPPQTLRGW  | Negative |
| Q8TD06 | VSSNLAIAIKKEKRPPQTLS | Negative |
| Q8TD06 | AIKKEKRPPQTLRGWGDDI  | Negative |
| Q8TD06 | TVSSNLAIAIKKEKRPPQTL | Negative |
| Q8TD06 | KRPPQTLRGWGDDITWVQT  | Negative |
| Q8TD06 | LCLLLVTVSSNLAIAIKKEK | Negative |
| Q8TD06 | VTVSSNLAIAIKKEKRPPQT | Negative |
| Q8TD06 | PPQTLRGWGDDITWVQTYE  | Negative |
| Q8TD06 | LAIKKEKRPPQTLRGWG    | Negative |
| Q8TD06 | MLHSALGLCLLLVTVSSNLA | Negative |
| Q8TD06 | LLVTVSSNLAIAIKKEKRPP | Negative |
| Q8TD06 | SSNLAIAIKKEKRPPQTLR  | Negative |
| Q8TD06 | SNLAIAIKKEKRPPQTLRG  | Negative |
| Q8TD06 | LHSALGLCLLLVTVSSNLAI | Negative |
| Q8TD06 | KKEKRPPQTLRGWGDDITW  | Negative |
| Q8TD06 | KEKRPPQTLRGWGDDITWV  | Negative |
| Q8TD06 | EKRPPQTLRGWGDDITWVQ  | Negative |
| Q8TD06 | ALGLCLLLVTVSSNLAIAIK | Negative |
| Q8TD06 | HSALGLCLLLVTVSSNLAIA | Negative |
| Q8TD06 | IKKEKRPPQTLRGWGDDIT  | Negative |
| Q8TD06 | IAIKKEKRPPQTLRGWGDD  | Negative |
| Q8TD06 | RPPQTLRGWGDDITWVQTY  | Negative |
| Q8TD06 | LLLVTVSSNLAIAIKKEKRP | Negative |

|        |                       |          |
|--------|-----------------------|----------|
| Q8TD06 | CLLLVTVSSNLAIKKEKR    | Negative |
| Q8TD06 | SALGLCLLLVTVSSNLAI    | Negative |
| Q8TD06 | AIAIKKEKRPPQTLRSGWGD  | Negative |
| Q8TD06 | MMLHSALGLCLLLVTVSSNL  | Negative |
| Q8TD06 | GLCLLLVTVSSNLAIKKE    | Negative |
| Q8TD06 | LVTVSSNLAIKKEKRPPQ    | Negative |
| Q8UUG0 | LSMVVMAEPGD AFFHHIFR  | Negative |
| Q8UUG0 | PGDAFFHHIFRGIVHVGKTI  | Negative |
| Q8UUG0 | KCATLFLVLSMVVMAEPGD   | Negative |
| Q8UUG0 | RGIVHVGKTIHRLVTGGKAE  | Negative |
| Q8UUG0 | MVVMAEPGD AFFHHIFRGI  | Negative |
| Q8UUG0 | MAEPGD AFFHHIFRGIVHVG | Negative |
| Q8UUG0 | FLVLSMVVMAEPGD AFFHH  | Negative |
| Q8UUG0 | AFHHIFRGIVHVGKTIHRL   | Negative |
| Q8UUG0 | FRGIVHVGKTIHRLVTGGKA  | Negative |
| Q8UUG0 | TLFLVLSMVVMAEPGD AFF  | Negative |
| Q8UUG0 | LFLVLSMVVMAEPGD AFFH  | Negative |
| Q8UUG0 | VLMAEPGD AFFHHIFRGIVH | Negative |
| Q8UUG0 | IFRGIVHVGKTIHRLVTGGK  | Negative |
| Q8UUG0 | EPGD AFFHHIFRGIVHVGKT | Negative |
| Q8UUG0 | GIVHVGKTIHRLVTGGKAEQ  | Negative |
| Q8UUG0 | HIFRGIVHVGKTIHRLVTGG  | Negative |
| Q8UUG0 | LMAEPGD AFFHHIFRGIVHV | Negative |
| Q8UUG0 | GDAFFHHIFRGIVHVGKTIH  | Negative |
| Q8UUG0 | MKCATLFLVLSMVVMAEPG   | Negative |
| Q8UUG0 | SMVVMAEPGD AFFHHIFRG  | Negative |
| Q8UUG0 | AEPGD AFFHHIFRGIVHVGK | Negative |
| Q8UUG0 | VLSMVVMAEPGD AFFHHIF  | Negative |
| Q8UUG0 | FHHIFRGIVHVGKTIHRLVT  | Negative |
| Q8UUG0 | ATLFLVLSMVVMAEPGD AF  | Negative |
| Q8UUG0 | CATLFLVLSMVVMAEPGDA   | Negative |
| Q8UUG0 | DAFFHHIFRGIVHVGKTIHR  | Negative |
| Q8UUG0 | HHIFRGIVHVGKTIHRLVTG  | Negative |
| Q8UUG0 | FFHHIFRGIVHVGKTIHRLV  | Negative |
| Q8UUG0 | VVMAEPGD AFFHHIFRGIV  | Negative |
| Q8UVU7 | LGKMILQETGKNAATSYGFY  | Negative |
| Q8UVU7 | GKNAATSYGFYGCNCGVRR   | Negative |
| Q8UVU7 | VGVEGSVYELGKMILQETGK  | Negative |
| Q8UVU7 | TLLIVAVLLVGVEGSVYELG  | Negative |
| Q8UVU7 | ELGKMILQETGKNAATSYGF  | Negative |
| Q8UVU7 | ETGKNAATSYGFYGCNCGVG  | Negative |
| Q8UVU7 | LIVAVLLVGVEGSVYELGKM  | Negative |
| Q8UVU7 | KMILQETGKNAATSYGFYGC  | Negative |
| Q8UVU7 | VYELGKMILQETGKNAATSY  | Negative |
| Q8UVU7 | LLVGVEGSVYELGKMILQET  | Negative |
| Q8UVU7 | SVYELGKMILQETGKNAATS  | Negative |

|        |                      |          |
|--------|----------------------|----------|
| Q8UVU7 | GVEGSVYELGKMILQETGKN | Negative |
| Q8UVU7 | GKMILQETGKNAATSYGFYG | Negative |
| Q8UVU7 | YELGKMILQETGKNAATSYG | Negative |
| Q8UVU7 | MILQETGKNAATSYGFYGCN | Negative |
| Q8UVU7 | VEGSVYELGKMILQETGKNA | Negative |
| Q8UVU7 | AVLLVGVEGSVYELGKMILQ | Negative |
| Q8UVU7 | GSVYELGKMILQETGKNAAT | Negative |
| Q8UVU7 | LLIVAVLLVGVEGSVYELGK | Negative |
| Q8UVU7 | QETGKNAATSYGFYGCNCGV | Negative |
| Q8UVU7 | VLLVGVEGSVYELGKMILQE | Negative |
| Q8UVU7 | LVGVEGSVYELGKMILQETG | Negative |
| Q8UVU7 | ILQETGKNAATSYGFYGCNC | Negative |
| Q8UVU7 | LQETGKNAATSYGFYGCNCG | Negative |
| Q8UVU7 | VAVLLVGVEGSVYELGKMIL | Negative |
| Q8UVU7 | EGSVYELGKMILQETGKNAA | Negative |
| Q8UVU7 | MRTLLIVAVLLVGVEGSVYE | Negative |
| Q8UVU7 | TGKNAATSYGFYGCNCGVGR | Negative |
| Q8UVU7 | IVAVLLVGVEGSVYELGKMI | Negative |
| Q8UVZ7 | MRTFWIVAMLLVGVEGSLVE | Negative |
| Q8UVZ7 | MILQETGKNPITSYGIYGCN | Negative |
| Q8UVZ7 | GKMILQETGKNPITSYGIYG | Negative |
| Q8UVZ7 | AMLLVGVEGSLVELGKMILQ | Negative |
| Q8UVZ7 | LLVGVEGSLVELGKMILQET | Negative |
| Q8UVZ7 | VAMLLVGVEGSLVELGKMIL | Negative |
| Q8UVZ7 | GSLVELGKMILQETGKNPIT | Negative |
| Q8UVZ7 | SLVELGKMILQETGKNPITS | Negative |
| Q8UVZ7 | ILQETGKNPITSYGIYGCNC | Negative |
| Q8UVZ7 | VELGKMILQETGKNPITSYG | Negative |
| Q8UVZ7 | TFWIVAMLLVGVEGSLVELG | Negative |
| Q8UVZ7 | EGSLVELGKMILQETGKNPI | Negative |
| Q8UVZ7 | GKNPITSYGIYGCNCGVGSR | Negative |
| Q8UVZ7 | QETGKNPITSYGIYGCNCGV | Negative |
| Q8UVZ7 | VEGSLVELGKMILQETGKNP | Negative |
| Q8UVZ7 | ELGKMILQETGKNPITSYGI | Negative |
| Q8UVZ7 | ETGKNPITSYGIYGCNCGVG | Negative |
| Q8UVZ7 | VGVEGSLVELGKMILQETGK | Negative |
| Q8UVZ7 | WIVAMLLVGVEGSLVELGKM | Negative |
| Q8UVZ7 | MLLVGVEGSLVELGKMILQE | Negative |
| Q8UVZ7 | FWIVAMLLVGVEGSLVELGK | Negative |
| Q8UVZ7 | LQETGKNPITSYGIYGCNCG | Negative |
| Q8UVZ7 | TGKNPITSYGIYGCNCGVGS | Negative |
| Q8UVZ7 | LVGVEGSLVELGKMILQETG | Negative |
| Q8UVZ7 | LGKMILQETGKNPITSYGIY | Negative |
| Q8UVZ7 | KMILQETGKNPITSYGIYGC | Negative |
| Q8UVZ7 | LVELGKMILQETGKNPITSY | Negative |
| Q8UVZ7 | IVAMLLVGVEGSLVELGKMI | Negative |

|        |                       |          |
|--------|-----------------------|----------|
| Q8UVZ7 | GVEGSLVELGKMILQETGKN  | Negative |
| Q8VCS0 | LLMDSIIQALAELEQKVPVT  | Negative |
| Q8VCS0 | ALWIVLGLLLWPEPGAASSL  | Negative |
| Q8VCS0 | ASSLPLLMDSDIIQALAELEQ | Negative |
| Q8VCS0 | PGAASSLPLLMDSDIIQALAE | Negative |
| Q8VCS0 | LLWPEPGAASSLPLLMDSDI  | Negative |
| Q8VCS0 | MKAWGALWIVLGLLLWPEPG  | Negative |
| Q8VCS0 | IVLGLLLWPEPGAASSLPLL  | Negative |
| Q8VCS0 | EPGAASSLPLLMDSDIIQALA | Negative |
| Q8VCS0 | DSIIQALAELEQKVPVTEAS  | Negative |
| Q8VCS0 | VLGLLLWPEPGAASSLPLLM  | Negative |
| Q8VCS0 | AWGALWIVLGLLLWPEPGAA  | Negative |
| Q8VCS0 | LWIVLGLLLWPEPGAASSLP  | Negative |
| Q8VCS0 | WGALWIVLGLLLWPEPGAAS  | Negative |
| Q8VCS0 | MDSIIQALAELEQKVPVTEA  | Negative |
| Q8VCS0 | PLLMDSDIIQALAELEQKVPV | Negative |
| Q8VCS0 | GAASSLPLLMDSDIIQALAE  | Negative |
| Q8VCS0 | LLWPEPGAASSLPLLMDSDI  | Negative |
| Q8VCS0 | LGLLLWPEPGAASSLPLLMD  | Negative |
| Q8VCS0 | LWPEPGAASSLPLLMDSDIIQ | Negative |
| Q8VCS0 | LMDSIIQALAELEQKVPVTE  | Negative |
| Q8VCS0 | AASSLPLLMDSDIIQALAELE | Negative |
| Q8VCS0 | LPLLMDSDIIQALAELEQKVP | Negative |
| Q8VCS0 | GALWIVLGLLLWPEPGAASS  | Negative |
| Q8VCS0 | SLPLLMDSDIIQALAELEQKV | Negative |
| Q8VCS0 | SSLPLLMDSDIIQALAELEQK | Negative |
| Q8VCS0 | KAWGALWIVLGLLLWPEPGA  | Negative |
| Q8VCS0 | PEPGAASSLPLLMDSDIIQAL | Negative |
| Q8VCS0 | WPEPGAASSLPLLMDSDIIQA | Negative |
| Q8VCS0 | GLLWPEPGAASSLPLLMDSD  | Negative |
| Q8VCT4 | VVNTVKGKVLGKYVNLEGFT  | Negative |
| Q8VCT4 | PSSPPVVNTVKGKVLGKYVN  | Negative |
| Q8VCT4 | WLSLAATAWGYPSSPPVVN   | Negative |
| Q8VCT4 | YPSSPPVVNTVKGKVLGKYV  | Negative |
| Q8VCT4 | GLYPLIWLSLAATAWGYPS   | Negative |
| Q8VCT4 | PPVVNTVKGKVLGKYVNLEG  | Negative |
| Q8VCT4 | SSPPVVNTVKGKVLGKYVNL  | Negative |
| Q8VCT4 | PVVNTVKGKVLGKYVNLEGF  | Negative |
| Q8VCT4 | VKGKVLGKYVNLEGFTQPVA  | Negative |
| Q8VCT4 | AWGYPSPPVVNTVKGKVLG   | Negative |
| Q8VCT4 | PLIWLSLAATAWGYPSPP    | Negative |
| Q8VCT4 | MGLYPLIWLSLAATAWGYP   | Negative |
| Q8VCT4 | VNTVKGKVLGKYVNLEGFTQ  | Negative |
| Q8VCT4 | LSLAATAWGYPSPPVVNT    | Negative |
| Q8VCT4 | AAATAWGYPSPPVVNTVKG   | Negative |
| Q8VCT4 | WGYPSPPVVNTVKGKVLGK   | Negative |

|        |                      |          |
|--------|----------------------|----------|
| Q8VCT4 | CTAWGYPSSPPVVNTVKGKV | Negative |
| Q8VCT4 | SLAACTAWGYPSSPPVVNTV | Negative |
| Q8VCT4 | GYPSSPPVVNTVKGKVLGKY | Negative |
| Q8VCT4 | LYPLIWLSLAACTAWGYPSS | Negative |
| Q8VCT4 | TAWGYPSSPPVVNTVKGKVL | Negative |
| Q8VCT4 | ACTAWGYPSSPPVVNTVKGK | Negative |
| Q8VCT4 | KGKVLGKYVNLEGFTQPVAV | Negative |
| Q8VCT4 | LIWLSLAACTAWGYPSSPPV | Negative |
| Q8VCT4 | SPPVVNTVKGKVLGKYVNLE | Negative |
| Q8VCT4 | TVKGKVLGKYVNLEGFTQPV | Negative |
| Q8VCT4 | IWLSLAACTAWGYPSSPPVV | Negative |
| Q8VCT4 | NTVKGKVLGKYVNLEGFTQP | Negative |
| Q8VCT4 | LAACTAWGYPSSPPVVNTVK | Negative |
| Q8VSL2 | IYYLKYCHITKSLIAVSELA | Negative |
| Q8VSL2 | MNKIYYLKYCHITKSLIAVS | Negative |
| Q8VSL2 | YCHITKSLIAVSELARRVTC | Negative |
| Q8VSL2 | LKYCHITKSLIAVSELARRV | Negative |
| Q8VSL2 | KSHRRLSRRVILTSVAALSL | Negative |
| Q8VSL2 | KSLIAVSELARRVTCKSHRR | Negative |
| Q8VSL2 | YYLKYCHITKSLIAVSELAR | Negative |
| Q8VSL2 | LARRVTCKSHRRLSRRVILT | Negative |
| Q8VSL2 | KIYYLKYCHITKSLIAVSEL | Negative |
| Q8VSL2 | SLIAVSELARRVTCKSHRRL | Negative |
| Q8VSL2 | NKIYYLKYCHITKSLIAVSE | Negative |
| Q8VSL2 | YLKYCHITKSLIAVSELARR | Negative |
| Q8VSL2 | RVTCKSHRRLSRRVILTSVA | Negative |
| Q8VSL2 | TCKSHRRLSRRVILTSVAAL | Negative |
| Q8VSL2 | KYCHITKSLIAVSELARRVT | Negative |
| Q8VSL2 | HITKSLIAVSELARRVTCKS | Negative |
| Q8VSL2 | ARRVTCKSHRRLSRRVILTS | Negative |
| Q8VSL2 | VTCKSHRRLSRRVILTSVAA | Negative |
| Q8VSL2 | TKSLIAVSELARRVTCKSHR | Negative |
| Q8VSL2 | CKSHRRLSRRVILTSVAALS | Negative |
| Q8VSL2 | ITKSLIAVSELARRVTCKSH | Negative |
| Q8VSL2 | ELARRVTCKSHRRLSRRVIL | Negative |
| Q8VSL2 | LIAVSELARRVTCKSHRRLS | Negative |
| Q8VSL2 | VSELARRVTCKSHRRLSRRV | Negative |
| Q8VSL2 | IAVSELARRVTCKSHRRLSR | Negative |
| Q8VSL2 | SELARRVTCKSHRRLSRRVI | Negative |
| Q8VSL2 | RRVTCKSHRRLSRRVILTSV | Negative |
| Q8VSL2 | AVSELARRVTCKSHRRLSRR | Negative |
| Q8VSL2 | CHITKSLIAVSELARRVTCK | Negative |
| Q8VSL2 | SHRRLSRRVILTSVAALSLS | Negative |
| Q8W257 | TIAVVGAGYSGLSAAFTLVK | Negative |
| Q8W257 | FLIAYLACTALTHDFDDTIA | Negative |
| Q8W257 | THDFDDTIAVVGAGYSGLSA | Negative |



|        |                      |          |
|--------|----------------------|----------|
| Q8W257 | VLHIFLIAYLACTALTHDFD | Negative |
| Q8W257 | IFLIAYLACTALTHDFDDTI | Negative |
| Q8W257 | RVLHIFLIAYLACTALTHDF | Negative |
| Q8W257 | FDDTIAVVGAGYSGLSAAFT | Negative |
| Q8W257 | YLACTALTHDFDDTIAVVG  | Negative |
| Q8W257 | VVGAGYSGLSAAFTLVKKGY | Negative |
| Q8W257 | DTIAVVGAGYSGLSAAFTLV | Negative |
| Q8W257 | LIAYLACTALTHDFDDTIAV | Negative |
| Q8W257 | MSLNRVLHIFLIAYLACTAL | Negative |
| Q8W257 | LTHDFDDTIAVVGAGYSGLS | Negative |
| Q8W257 | DFDDTIAVVGAGYSGLSAAF | Negative |
| Q8W257 | ALTHDFDDTIAVVGAGYSGL | Negative |
| Q8W257 | AYLACTALTHDFDDTIAVVG | Negative |
| Q8W257 | DDTIAVVGAGYSGLSAAFTL | Negative |
| Q8W257 | AVVGAGYSGLSAAFTLVKKG | Negative |
| Q8W257 | HIFLIAYLACTALTHDFDDT | Negative |
| Q8W257 | SLNRVLHIFLIAYLACTALT | Negative |
| Q8W257 | NRVLHIFLIAYLACTALTHD | Negative |
| Q8W257 | HDFDDTIAVVGAGYSGLSAA | Negative |
| Q8W257 | LNRVLHIFLIAYLACTALTH | Negative |
| Q8W257 | ACTALTHDFDDTIAVVGAGY | Negative |
| Q8W257 | IAYLACTALTHDFDDTIAVV | Negative |
| Q8W257 | IAVVGAGYSGLSAAFTLVKK | Negative |
| Q8W257 | CTALTHDFDDTIAVVGAGYS | Negative |
| Q8W257 | LACTALTHDFDDTIAVVGAG | Negative |
| Q8W257 | TALTHDFDDTIAVVGAGYSG | Negative |
| Q8WMP9 | CLYRSTLLTGGLLFLMLAD  | Negative |
| Q8WMP9 | RSTLLTGGLLFLMLADPAF  | Negative |
| Q8WMP9 | LMLADPAFPAGSRPPVVLVP | Negative |
| Q8WMP9 | TLLTGGLLFLMLADPAFPA  | Negative |
| Q8WMP9 | DPAFPAGSRPPVVLVPGDMG | Negative |
| Q8WMP9 | TGGLLFLMLADPAFPAGSR  | Negative |
| Q8WMP9 | LADPAFPAGSRPPVVLVPGD | Negative |
| Q8WMP9 | AGSRPPVVLVPGDMGNQLEA | Negative |
| Q8WMP9 | GGLLFLMLADPAFPAGSRP  | Negative |
| Q8WMP9 | MGCLCLYRSTLLTGGLLFL  | Negative |
| Q8WMP9 | LTGGLLFLMLADPAFPAGS  | Negative |
| Q8WMP9 | LFLMLADPAFPAGSRPPVV  | Negative |
| Q8WMP9 | LLFLMLADPAFPAGSRPPV  | Negative |
| Q8WMP9 | GSRPPVVLVPGDMGNQLEAK | Negative |
| Q8WMP9 | CLCLYRSTLLTGGLLFLML  | Negative |
| Q8WMP9 | MLADPAFPAGSRPPVVLVPG | Negative |
| Q8WMP9 | LYRSTLLTGGLLFLMLADP  | Negative |
| Q8WMP9 | ADPAFPAGSRPPVVLVPGDM | Negative |
| Q8WMP9 | FPAGSRPPVVLVPGDMGNQL | Negative |
| Q8WMP9 | PAFPAGSRPPVVLVPGDMGN | Negative |

|        |                      |          |
|--------|----------------------|----------|
| Q8WMP9 | YRSTLLTGGLLFLLMLADPA | Negative |
| Q8WMP9 | LLTGGLLFLLMLADPAFPAG | Negative |
| Q8WMP9 | LCLYRSTLLTGGLLFLLMLA | Negative |
| Q8WMP9 | PAGSRPPVVLVPGDMGNQLE | Negative |
| Q8WMP9 | LLMLADPAFPAGSRPPVVLV | Negative |
| Q8WMP9 | STLLTGGLLFLLMLADPAFP | Negative |
| Q8WMP9 | AFPAGSRPPVVLVPGDMGNQ | Negative |
| Q8WMP9 | GCLCLYRSTLLTGGLLFLLM | Negative |
| Q8WMP9 | FLLMLADPAFPAGSRPPVVL | Negative |
| Q8WP90 | KIGSQYDNYATCLAEHSLTE | Negative |
| Q8WP90 | ASASRDSARKIGSQYDNYAT | Negative |
| Q8WP90 | KTFVLHIFIFALVAFASASR | Negative |
| Q8WP90 | FALVAFASASRDSARKIGSQ | Negative |
| Q8WP90 | DSARKIGSQYDNYATCLAEH | Negative |
| Q8WP90 | LHIFIFALVAFASASRDSAR | Negative |
| Q8WP90 | SARKIGSQYDNYATCLAEHS | Negative |
| Q8WP90 | SASRDSARKIGSQYDNYATC | Negative |
| Q8WP90 | ALVAFASASRDSARKIGSQY | Negative |
| Q8WP90 | AFASASRDSARKIGSQYDNY | Negative |
| Q8WP90 | RDSARKIGSQYDNYATCLAE | Negative |
| Q8WP90 | IFIFALVAFASASRDSARKI | Negative |
| Q8WP90 | TFVLHIFIFALVAFASASRD | Negative |
| Q8WP90 | LVAFASASRDSARKIGSQYD | Negative |
| Q8WP90 | MKTFVLHIFIFALVAFASAS | Negative |
| Q8WP90 | HIFIFALVAFASASRDSARK | Negative |
| Q8WP90 | IFALVAFASASRDSARKIGS | Negative |
| Q8WP90 | FASASRDSARKIGSQYDNYA | Negative |
| Q8WP90 | ARKIGSQYDNYATCLAEHSL | Negative |
| Q8WP90 | FIFALVAFASASRDSARKIG | Negative |
| Q8WP90 | FVLHIFIFALVAFASASRDS | Negative |
| Q8WP90 | RKIGSQYDNYATCLAEHSLT | Negative |
| Q8WP90 | IGSQYDNYATCLAEHSLTED | Negative |
| Q8WP90 | ASRDSARKIGSQYDNYATCL | Negative |
| Q8WP90 | SRDSARKIGSQYDNYATCLA | Negative |
| Q8WP90 | VAFASASRDSARKIGSQYDN | Negative |
| Q8WP90 | GSQYDNYATCLAEHSLTEDD | Negative |
| Q8WP90 | SQYDNYATCLAEHSLTEDDI | Negative |
| Q8WP90 | QYDNYATCLAEHSLTEDDIF | Negative |
| Q8WPD0 | PPKCPPMWTFYNGNCYRYFG | Negative |
| Q8WPD0 | ACQPDCSWKCPPKCPMWTF  | Negative |
| Q8WPD0 | CQPDCSWKCPPKCPMWTFY  | Negative |
| Q8WPD0 | LVGFAAACQPDCSWKCPPKC | Negative |
| Q8WPD0 | GFAAACQPDCSWKCPPKCPP | Negative |
| Q8WPD0 | MAFFRALCFVLLVGFAAACQ | Negative |
| Q8WPD0 | LLVGFAAACQPDCSWKCPPK | Negative |
| Q8WPD0 | WKCPPKCPMWTFYNGNCYR  | Negative |

|        |                       |          |
|--------|-----------------------|----------|
| Q8WPD0 | SWKCPPKCPPMWTIFYNGNCY | Negative |
| Q8WPD0 | QPDCSWKCPPKCPPMWTIFYN | Negative |
| Q8WPD0 | AAACQPDCSWKCPPKCPPMW  | Negative |
| Q8WPD0 | KCPPKCPPMWTIFYNGNCYRY | Negative |
| Q8WPD0 | KCPPMWTIFYNGNCYRYFGTG | Negative |
| Q8WPD0 | AACQPDCSWKCPPKCPPMWT  | Negative |
| Q8WPD0 | PDCSWKCPPKCPPMWTIFYNG | Negative |
| Q8WPD0 | ALCFVLLVGFAAACQPDCSW  | Negative |
| Q8WPD0 | CFVLLVGFAAACQPDCSWKC  | Negative |
| Q8WPD0 | FAAACQPDCSWKCPPKCPPM  | Negative |
| Q8WPD0 | DCSWKCPPKCPPMWTIFYNGN | Negative |
| Q8WPD0 | CSWKCPPKCPPMWTIFYNGNC | Negative |
| Q8WPD0 | LCFVLLVGFAAACQPDCSWK  | Negative |
| Q8WPD0 | VLLVGFAAACQPDCSWKCPP  | Negative |
| Q8WPD0 | AFFRALCFVLLVGFAAACQP  | Negative |
| Q8WPD0 | VGFAAACQPDCSWKCPPKCP  | Negative |
| Q8WPD0 | PKCPPMWTIFYNGNCYRYFGT | Negative |
| Q8WPD0 | CPPKCPPMWTIFYNGNCYRYF | Negative |
| Q8WPD0 | FFRALCFVLLVGFAAACQPD  | Negative |
| Q8WPD0 | RALCFVLLVGFAAACQPDCS  | Negative |
| Q8WPD0 | FVLLVGFAAACQPDCSWKCP  | Negative |
| Q8WPJ2 | SVSGTNLNYNNGHHIFLSGAN | Negative |
| Q8WPJ2 | LNYNNGHHIFLSGANQAWVNY | Negative |
| Q8WPJ2 | MLLTALAVLFASTGCQARLS  | Negative |
| Q8WPJ2 | TALAVLFASTGCQARLSVSG  | Negative |
| Q8WPJ2 | FASTGCQARLSVSGTNLNYN  | Negative |
| Q8WPJ2 | NGHHIFLSGANQAWVNYARD  | Negative |
| Q8WPJ2 | NYNNGHHIFLSGANQAWVNYA | Negative |
| Q8WPJ2 | GTNLNYNNGHHIFLSGANQAW | Negative |
| Q8WPJ2 | CQARLSVSGTNLNYNNGHHIF | Negative |
| Q8WPJ2 | LFASTGCQARLSVSGTNLNYN | Negative |
| Q8WPJ2 | ALAVLFASTGCQARLSVSGT  | Negative |
| Q8WPJ2 | ARLSVSGTNLNYNNGHHIFLS | Negative |
| Q8WPJ2 | RLSVSGTNLNYNNGHHIFLSG | Negative |
| Q8WPJ2 | TNLNYNNGHHIFLSGANQAWV | Negative |
| Q8WPJ2 | SGTNLNYNNGHHIFLSGANQA | Negative |
| Q8WPJ2 | GCQARLSVSGTNLNYNNGHHI | Negative |
| Q8WPJ2 | QARLSVSGTNLNYNNGHHIFL | Negative |
| Q8WPJ2 | STGCQARLSVSGTNLNYNNGH | Negative |
| Q8WPJ2 | LAVLFASTGCQARLSVSGTN  | Negative |
| Q8WPJ2 | VLFASTGCQARLSVSGTNLN  | Negative |
| Q8WPJ2 | GHHIFLSGANQAWVNYARDF  | Negative |
| Q8WPJ2 | LLTALAVLFASTGCQARLSV  | Negative |
| Q8WPJ2 | VSGTNLNYNNGHHIFLSGANQ | Negative |
| Q8WPJ2 | AVLFASTGCQARLSVSGTNL  | Negative |
| Q8WPJ2 | LSVSGTNLNYNNGHHIFLSGA | Negative |

|        |                       |          |
|--------|-----------------------|----------|
| Q8WPJ2 | ASTGCQARLSVSGTNLNYNG  | Negative |
| Q8WPJ2 | TGCQARLSVSGTNLNYNGHH  | Negative |
| Q8WPJ2 | YNGHHIFLSGANQAWVNYAR  | Negative |
| Q8WPJ2 | NLNYNGHHIFLSGANQAWVN  | Negative |
| Q8WQK0 | KDNDCCDRFTEYCAIYADEN  | Negative |
| Q8WQK0 | LIVLCGLIFVTVDAMIDAPC  | Negative |
| Q8WQK0 | DAMIDAPCKDNDDCCDRFTEY | Negative |
| Q8WQK0 | VDAMIDAPCKDNDDCCDRFTE | Negative |
| Q8WQK0 | GLIFVTVDAMIDAPCKDNDD  | Negative |
| Q8WQK0 | SKIILAIFLIVLCGLIFVTV  | Negative |
| Q8WQK0 | LIFVTVDAMIDAPCKDNDDC  | Negative |
| Q8WQK0 | IILAIFLIVLCGLIFVTVDA  | Negative |
| Q8WQK0 | VLCGLIFVTVDAMIDAPCKD  | Negative |
| Q8WQK0 | KIILAIFLIVLCGLIFVTVD  | Negative |
| Q8WQK0 | LCGLIFVTVDAMIDAPCKDN  | Negative |
| Q8WQK0 | ILAIFLIVLCGLIFVTVDAM  | Negative |
| Q8WQK0 | AMIDAPCKDNDDCCDRFTEYC | Negative |
| Q8WQK0 | MSKIILAIFLIVLCGLIFVT  | Negative |
| Q8WQK0 | VTVDAMIDAPCKDNDDCCDRF | Negative |
| Q8WQK0 | CGLIFVTVDAMIDAPCKDND  | Negative |
| Q8WQK0 | IDAPCKDNDDCCDRFTEYCAI | Negative |
| Q8WQK0 | IVLCGLIFVTVDAMIDAPCK  | Negative |
| Q8WQK0 | TVDAMIDAPCKDNDDCCDRFT | Negative |
| Q8WQK0 | FVTVDAMIDAPCKDNDDCCDR | Negative |
| Q8WQK0 | CKDNDDCCDRFTEYCAIYADE | Negative |
| Q8WQK0 | APCKDNDDCCDRFTEYCAIYA | Negative |
| Q8WQK0 | IFVTVDAMIDAPCKDNDDCCD | Negative |
| Q8WQK0 | PCKDNDDCCDRFTEYCAIYAD | Negative |
| Q8WQK0 | IFLIVLCGLIFVTVDAMIDA  | Negative |
| Q8WQK0 | LAIFLIVLCGLIFVTVDAMI  | Negative |
| Q8WQK0 | AIFLIVLCGLIFVTVDAMID  | Negative |
| Q8WQK0 | DAPCKDNDDCCDRFTEYCAIY | Negative |
| Q8WQK0 | MIDAPCKDNDDCCDRFTEYCA | Negative |
| Q8WRY4 | VWAEDGYLFDKRKRCTLACI  | Negative |
| Q8WRY4 | TACLILIGTVWAEDGYLFDK  | Negative |
| Q8WRY4 | ILIGTVWAEDGYLFDKRKRRC | Negative |
| Q8WRY4 | IGTVWAEDGYLFDKRKRCTL  | Negative |
| Q8WRY4 | GYLFDKRKRCTLACIDKTGD  | Negative |
| Q8WRY4 | ITACLILIGTVWAEDGYLFD  | Negative |
| Q8WRY4 | AEDGYLFDKRKRCTLACIDK  | Negative |
| Q8WRY4 | YLFDKRKRCTLACIDKTGDK  | Negative |
| Q8WRY4 | LLMITACLILIGTVWAEDGY  | Negative |
| Q8WRY4 | NSLLMITACLILIGTVWAED  | Negative |
| Q8WRY4 | LFDKRKRCTLACIDKTGDKN  | Negative |
| Q8WRY4 | TVWAEDGYLFDKRKRCTLAC  | Negative |
| Q8WRY4 | EDGYLFDKRKRCTLACIDKT  | Negative |

|        |                       |          |
|--------|-----------------------|----------|
| Q8WRY4 | LIGTVWAEDGYLFDKRKRCT  | Negative |
| Q8WRY4 | LILIGTVWAEDGYLFDKRKR  | Negative |
| Q8WRY4 | GTVWAEDGYLFDKRKRCTLA  | Negative |
| Q8WRY4 | KRKRCTLACIDKTGDKNCDR  | Negative |
| Q8WRY4 | RCTLACIDKTGDKNCDRNCK  | Negative |
| Q8WRY4 | DGYLFDKRKRCTLACIDKTG  | Negative |
| Q8WRY4 | CLILIGTVWAEDGYLFDKRK  | Negative |
| Q8WRY4 | KRCTLACIDKTGDKNCDRNC  | Negative |
| Q8WRY4 | MITACLILIGTVWAEDGYLF  | Negative |
| Q8WRY4 | MNSLLMITACLILIGTVWAE  | Negative |
| Q8WRY4 | ACLILIGTVWAEDGYLFDKR  | Negative |
| Q8WRY4 | SLLMITACLILIGTVWAEDG  | Negative |
| Q8WRY4 | DKRKRCTLACIDKTGDKNCD  | Negative |
| Q8WRY4 | FDKRKRCTLACIDKTGDKNC  | Negative |
| Q8WRY4 | WAEDGYLFDKRKRCTLACID  | Negative |
| Q8WRY4 | RKRCTLACIDKTGDKNCDRN  | Negative |
| Q8WUJ3 | KAMLTISWLTLTCTPGATST  | Negative |
| Q8WUJ3 | MLTISWLTLTCTPGATSTVA  | Negative |
| Q8WUJ3 | LFKAMLTISWLTLTCTPGAT  | Negative |
| Q8WUJ3 | GRQDFLFKAMLTISWLTCT   | Negative |
| Q8WUJ3 | PGATSTVAAGCPDQSPQLP   | Negative |
| Q8WUJ3 | CTPGATSTVAAGCPDQSPQL  | Negative |
| Q8WUJ3 | LCTPGATSTVAAGCPDQSP   | Negative |
| Q8WUJ3 | LTISWLTLTCTPGATSTVAA  | Negative |
| Q8WUJ3 | ISWLTLTCTPGATSTVAAGC  | Negative |
| Q8WUJ3 | STVAAGCPDQSPQLPWNPG   | Negative |
| Q8WUJ3 | QDFLFKAMLTISWLTLTCTP  | Negative |
| Q8WUJ3 | GATSTVAAGCPDQSPQLPW   | Negative |
| Q8WUJ3 | MGAAGRQDFLFKAMLTISWL  | Negative |
| Q8WUJ3 | FLFKAMLTISWLTLTCTPGA  | Negative |
| Q8WUJ3 | AAGRQDFLFKAMLTISWLT   | Negative |
| Q8WUJ3 | TSTVAAGCPDQSPQLPWNP   | Negative |
| Q8WUJ3 | SWLTLTCTPGATSTVAAGCP  | Negative |
| Q8WUJ3 | LTCTPGATSTVAAGCPDQS   | Negative |
| Q8WUJ3 | WLTLTCTPGATSTVAAGCPD  | Negative |
| Q8WUJ3 | DFLFKAMLTISWLTLTCTPG  | Negative |
| Q8WUJ3 | FPGATSTVAAGCPDQSPQLQ  | Negative |
| Q8WUJ3 | GAAGRQDFLFKAMLTISWLT  | Negative |
| Q8WUJ3 | LTLCTPGATSTVAAGCPDQ   | Negative |
| Q8WUJ3 | AMLTISWLTLTCTPGATSTV  | Negative |
| Q8WUJ3 | RQDFLFKAMLTISWLTLTCTF | Negative |
| Q8WUJ3 | CTPGATSTVAAGCPDQSPE   | Negative |
| Q8WUJ3 | ATSTVAAGCPDQSPQLPWN   | Negative |
| Q8WUJ3 | AGRQDFLFKAMLTISWLTLT  | Negative |
| Q8WUJ3 | FKAMLTISWLTLTCTPGATS  | Negative |
| Q8WWA0 | LFLIATTRGWSTDEANTYFK  | Negative |

|        |                       |          |
|--------|-----------------------|----------|
| Q8WWA0 | EANTYFKEWTCSSSPSLPRS  | Negative |
| Q8WWA0 | ATTRGWSTDEANTYFKEWTC  | Negative |
| Q8WWA0 | LIATTRGWSTDEANTYFKEW  | Negative |
| Q8WWA0 | STDEANTYFKEWTCSSSPSL  | Negative |
| Q8WWA0 | TCSSSPSLPRSCKEIKDECP  | Negative |
| Q8WWA0 | RGWSTDEANTYFKEWTCSSS  | Negative |
| Q8WWA0 | TYFKEWTCSSSPSLPRSCKE  | Negative |
| Q8WWA0 | TTRGWSTDEANTYFKEWTC   | Negative |
| Q8WWA0 | YFKEWTCSSSPSLPRSCKEI  | Negative |
| Q8WWA0 | SFLLFLIATTRGWSTDEANT  | Negative |
| Q8WWA0 | IATTRGWSTDEANTYFKEWT  | Negative |
| Q8WWA0 | ANTYFKEWTCSSSPSLPRSC  | Negative |
| Q8WWA0 | FKEWTCSSSPSLPRSCKEIK  | Negative |
| Q8WWA0 | NTYFKEWTCSSSPSLPRSCK  | Negative |
| Q8WWA0 | FLLFLIATTRGWSTDEANTY  | Negative |
| Q8WWA0 | QLSFLLFLIATTRGWSTDEA  | Negative |
| Q8WWA0 | WTCSSSPSLPRSCKEIKDEC  | Negative |
| Q8WWA0 | LLFLIATTRGWSTDEANTYF  | Negative |
| Q8WWA0 | DEANTYFKEWTCSSSPSLPR  | Negative |
| Q8WWA0 | NQLSFLLFLIATTRGWSTDE  | Negative |
| Q8WWA0 | GWSTDEANTYFKEWTCSSSP  | Negative |
| Q8WWA0 | EWTCSSSPSLPRSCKEIKDE  | Negative |
| Q8WWA0 | TRGWSTDEANTYFKEWTCSS  | Negative |
| Q8WWA0 | KEWTCSSSPSLPRSCKEIKD  | Negative |
| Q8WWA0 | WSTDEANTYFKEWTCSSSPS  | Negative |
| Q8WWA0 | MNQLSFLLFLIATTRGWSTD  | Negative |
| Q8WWA0 | FLIATTRGWSTDEANTYFKE  | Negative |
| Q8WWA0 | TDEANTYFKEWTCSSSPSLP  | Negative |
| Q8WXF3 | WVLTGELWPGAEEARAAPYGV | Negative |
| Q8WXF3 | TGELWPGAEEARAAPYGVRLC | Negative |
| Q8WXF3 | VWVLTGELWPGAEEARAAPYG | Negative |
| Q8WXF3 | GELWPGAEEARAAPYGVRLCG | Negative |
| Q8WXF3 | AAPYGVRLCGREFIRAVIFT  | Negative |
| Q8WXF3 | APYGVRLCGREFIRAVIFTC  | Negative |
| Q8WXF3 | LTGELWPGAEEARAAPYGVRL | Negative |
| Q8WXF3 | PGAEEARAAPYGVRLCGREFI | Negative |
| Q8WXF3 | YMLLLLLAVWVLTGELWPGA  | Negative |
| Q8WXF3 | MARYMLLLLLAVWVLTGELW  | Negative |
| Q8WXF3 | ARAAPYGVRLCGREFIRAVI  | Negative |
| Q8WXF3 | RAAPYGVRLCGREFIRAVIF  | Negative |
| Q8WXF3 | AEARAAPYGVRLCGREFIRA  | Negative |
| Q8WXF3 | MLLLLLAVWVLTGELWPGA   | Negative |
| Q8WXF3 | EARAAPYGVRLCGREFIRAV  | Negative |
| Q8WXF3 | WPGAEEARAAPYGVRLCGREF | Negative |
| Q8WXF3 | PYGVRLCGREFIRAVIFTG   | Negative |
| Q8WXF3 | LWPGAEEARAAPYGVRLCGRE | Negative |

|        |                       |          |
|--------|-----------------------|----------|
| Q8WXF3 | LLLLLAVWVLTGELWPGAEA  | Negative |
| Q8WXF3 | RYMLLLLLLAVWVLTGELWPG | Negative |
| Q8WXF3 | VLTGELWPGAEARAAPYGVR  | Negative |
| Q8WXF3 | LLLAVWVLTGELWPGAEARA  | Negative |
| Q8WXF3 | YGVRLCGREFIRAVIFTCGG  | Negative |
| Q8WXF3 | ELWPGAEARAAPYGVRLCGR  | Negative |
| Q8WXF3 | LLAVWVLTGELWPGAEARAA  | Negative |
| Q8WXF3 | LAVWVLTGELWPGAEARAAP  | Negative |
| Q8WXF3 | LLLLAVWVLTGELWPGAEAR  | Negative |
| Q8WXF3 | GAEARAAPYGVRLCGREFIR  | Negative |
| Q8WXF3 | ARYMLLLLLLAVWVLTGELWP | Negative |
| Q8WZI8 | RCNEFQNKIDIANVTVRVA   | Negative |
| Q8WZI8 | CNEFQNKIDIANVTVRVAY   | Negative |
| Q8WZI8 | TDPFQSRCNEFQNKIDIANV  | Negative |
| Q8WZI8 | MKVASLLSLALPGAALAATD  | Negative |
| Q8WZI8 | LLSLALPGAALAATDPFQSR  | Negative |
| Q8WZI8 | EFQNKIDIANVTVRVAYVA   | Negative |
| Q8WZI8 | GAALAATDPFQSRCNEFQNK  | Negative |
| Q8WZI8 | LSLALPGAALAATDPFQSRC  | Negative |
| Q8WZI8 | ALPGAALAATDPFQSRCNEF  | Negative |
| Q8WZI8 | ATDPFQSRCNEFQNKIDIAN  | Negative |
| Q8WZI8 | SLALPGAALAATDPFQSRCN  | Negative |
| Q8WZI8 | AALAATDPFQSRCNEFQNKI  | Negative |
| Q8WZI8 | PGAALAATDPFQSRCNEFQN  | Negative |
| Q8WZI8 | ALAATDPFQSRCNEFQNKID  | Negative |
| Q8WZI8 | LAATDPFQSRCNEFQNKIDI  | Negative |
| Q8WZI8 | FQSRCNEFQNKIDIANVTVR  | Negative |
| Q8WZI8 | QNKIDIANVTVRVAYVAAG   | Negative |
| Q8WZI8 | AATDPFQSRCNEFQNKIDIA  | Negative |
| Q8WZI8 | NEFQNKIDIANVTVRVAYV   | Negative |
| Q8WZI8 | SRCNEFQNKIDIANVTVRV   | Negative |
| Q8WZI8 | SLLSLALPGAALAATDPFQS  | Negative |
| Q8WZI8 | ASLLSLALPGAALAATDPFQ  | Negative |
| Q8WZI8 | PFQSRCNEFQNKIDIANVTV  | Negative |
| Q8WZI8 | FQNKIDIANVTVRVAYVAA   | Negative |
| Q8WZI8 | LALPGAALAATDPFQSRCNE  | Negative |
| Q8WZI8 | DPFQSRCNEFQNKIDIANVT  | Negative |
| Q8WZI8 | KVASLLSLALPGAALAATDP  | Negative |
| Q8WZI8 | QSRCNEFQNKIDIANVTVRS  | Negative |
| Q8WZI8 | LPGAALAATDPFQSRCNEFQ  | Negative |
| Q8X150 | AARHVAALPLAAEDAAATLS  | Negative |
| Q8X150 | ILAIVFAARHVAALPLAAED  | Negative |
| Q8X150 | AEDAAATLSLTSSASSTTVL  | Negative |
| Q8X150 | AALPLAAEDAAATLSLTSSA  | Negative |
| Q8X150 | ATLSLTSSASSTTVLPSTQ   | Negative |
| Q8X150 | PLAAEDAAATLSLTSSASST  | Negative |

|        |                      |          |
|--------|----------------------|----------|
| Q8X150 | ALPLAAEDAAATLSLTSSAS | Negative |
| Q8X150 | SLTSSASSTTVLPSTQYTL  | Negative |
| Q8X150 | TLTSSASSTTVLPSTQY    | Negative |
| Q8X150 | RILAIVFAARHVAALPLAAE | Negative |
| Q8X150 | HVAALPLAAEDAAATLSLT  | Negative |
| Q8X150 | ARHVAALPLAAEDAAATLSL | Negative |
| Q8X150 | EDAAATLSLTSSASSTTVLP | Negative |
| Q8X150 | VAALPLAAEDAAATLSLTSS | Negative |
| Q8X150 | VFAARHVAALPLAAEDAAAT | Negative |
| Q8X150 | AIVFAARHVAALPLAAEDAA | Negative |
| Q8X150 | AAEDAAATLSLTSSASSTTV | Negative |
| Q8X150 | AAATLSLTSSASSTTVLPSP | Negative |
| Q8X150 | LSLTSSASSTTVLPSTQYT  | Negative |
| Q8X150 | LAIVFAARHVAALPLAAEDA | Negative |
| Q8X150 | DAAATLSLTSSASSTTVLPS | Negative |
| Q8X150 | RHVAALPLAAEDAAATLSLT | Negative |
| Q8X150 | LAAEDAAATLSLTSSASSTT | Negative |
| Q8X150 | MRSRILAIVFAARHVAALPL | Negative |
| Q8X150 | AATLSLTSSASSTTVLPST  | Negative |
| Q8X150 | LPLAAEDAAATLSLTSSASS | Negative |
| Q8X150 | SRILAIVFAARHVAALPLAA | Negative |
| Q8X150 | FAARHVAALPLAAEDAAATL | Negative |
| Q8X150 | IVFAARHVAALPLAAEDAAA | Negative |
| Q90121 | FAAAMLPPVHSLGINCRGSS | Negative |
| Q90121 | LGINCRGSSQCGLSGGNLMV | Negative |
| Q90121 | NCRGSSQCGLSGGNLMVRIR | Negative |
| Q90121 | MLPPVHSLGINCRGSSQCGL | Negative |
| Q90121 | VYSFLFAAAMLPPVHSLGIN | Negative |
| Q90121 | INVVYSFLFAAAMLPPVHSL | Negative |
| Q90121 | LPVHSLGINCRGSSQCGLS  | Negative |
| Q90121 | GSSQCGLSGGNLMVRIRDQA | Negative |
| Q90121 | MQIINVVYSFLFAAAMLPPV | Negative |
| Q90121 | VVHSLGINCRGSSQCGLSGG | Negative |
| Q90121 | NVVYSFLFAAAMLPPVHSLG | Negative |
| Q90121 | LFAAAMLPPVHSLGINCRGS | Negative |
| Q90121 | IINVVYSFLFAAAMLPPVHS | Negative |
| Q90121 | GINCRGSSQCGLSGGNLMVR | Negative |
| Q90121 | SFLFAAAMLPPVHSLGINCR | Negative |
| Q90121 | SSQCGLSGGNLMVRIRDQAC | Negative |
| Q90121 | PPVHSLGINCRGSSQCGLSG | Negative |
| Q90121 | INCRGSSQCGLSGGNLMVRI | Negative |
| Q90121 | VHSLGINCRGSSQCGLSGGN | Negative |
| Q90121 | AAAMLPPVHSLGINCRGSSQ | Negative |
| Q90121 | VVYSFLFAAAMLPPVHSLGI | Negative |
| Q90121 | HSLGINCRGSSQCGLSGGNL | Negative |
| Q90121 | AMLPPVHSLGINCRGSSQCG | Negative |



|        |                      |          |
|--------|----------------------|----------|
| Q90121 | RGSSQCGLSGGNLMVRIRDQ | Negative |
| Q90121 | QIINVVYSFLFAAAMLPVVH | Negative |
| Q90121 | CRGSSQCGLSGGNLMVRIRD | Negative |
| Q90121 | AAMLPVVHSLGINCRGSSQC | Negative |
| Q90121 | FLFAAAMLPVVHSLGINCRG | Negative |
| Q90121 | SLGINCRGSSQCGLSGGNLM | Negative |
| Q90611 | LLIQVYLFNKTLAAPSPIIK | Negative |
| Q90611 | PIIKFPGDSTPKTDKELAVQ | Negative |
| Q90611 | YLFNKTLAAPSPIIKFPGDS | Negative |
| Q90611 | FKVLLIQVYLFNKTLAAPSP | Negative |
| Q90611 | LFNKTLAAPSPIIKFPGDST | Negative |
| Q90611 | NKTLAAPSPIIKFPGDSTPK | Negative |
| Q90611 | QVYLFNKTLAAPSPIIKFPG | Negative |
| Q90611 | IQVYLFNKTLAAPSPIIKFP | Negative |
| Q90611 | PSPIIKFPGDSTPKTDKELA | Negative |
| Q90611 | GFFFKVLLIQVYLFNKTLAA | Negative |
| Q90611 | VLLIQVYLFNKTLAAPSPII | Negative |
| Q90611 | SPIIKFPGDSTPKTDKELAV | Negative |
| Q90611 | LAAPSPIIKFPGDSTPKTDK | Negative |
| Q90611 | VFGFFFKVLLIQVYLFNKTL | Negative |
| Q90611 | FFFKVLLIQVYLFNKTLAAP | Negative |
| Q90611 | FFKVLLIQVYLFNKTLAAPS | Negative |
| Q90611 | SVFGFFFKVLLIQVYLFNK  | Negative |
| Q90611 | FGFFFKVLLIQVYLFNKTLA | Negative |
| Q90611 | VYLFNKTLAAPSPIIKFPGD | Negative |
| Q90611 | LIQVYLFNKTLAAPSPIIKF | Negative |
| Q90611 | KTLAAPSPIIKFPGDSTPKT | Negative |
| Q90611 | THSVFGFFFKVLLIQVYLFN | Negative |
| Q90611 | TLAAPSPIIKFPGDSTPKTD | Negative |
| Q90611 | MKTHSVFGFFFKVLLIQVYL | Negative |
| Q90611 | KTHSVFGFFFKVLLIQVYLF | Negative |
| Q90611 | FNKTLAAPSPIIKFPGDSTP | Negative |
| Q90611 | AAPSPIIKFPGDSTPKTDKE | Negative |
| Q90611 | HSVFGFFFKVLLIQVYLFNK | Negative |
| Q90611 | APSPIIKFPGDSTPKTDKEL | Negative |
| Q90W22 | TFLSPADMQKIAERQSQNKL | Negative |
| Q90W22 | LWTEGAQAGLTFLSPADMQK | Negative |
| Q90W22 | FLSPADMQKIAERQSQNKLR | Negative |
| Q90W22 | EGAQAGLTFLSPADMQKIAE | Negative |
| Q90W22 | VLFCLLWTEGAQAGLTFLSP | Negative |
| Q90W22 | AQAGLTFLSPADMQKIAERQ | Negative |
| Q90W22 | LSPADMQKIAERQSQNKLRH | Negative |
| Q90W22 | GAQAGLTFLSPADMQKIAER | Negative |
| Q90W22 | LFCLLWTEGAQAGLTFLSPA | Negative |
| Q90W22 | TEGAQAGLTFLSPADMQKIA | Negative |
| Q90W22 | MNFGKAAIFGVVLFCLLWTE | Negative |

|        |                      |          |
|--------|----------------------|----------|
| Q90W22 | SPADMQKIAERQSQNKLRHG | Negative |
| Q90W22 | KAAIFGVVLFCLLWTEGAQA | Negative |
| Q90W22 | FGKAAIFGVVLFCLLWTEGA | Negative |
| Q90W22 | NFGKAAIFGVVLFCLLWTEG | Negative |
| Q90W22 | FCLLWTEGAQAGLTFLSPAD | Negative |
| Q90W22 | GKAAIFGVVLFCLLWTEGAQ | Negative |
| Q90W22 | IFGVVLFCLLWTEGAQAGLT | Negative |
| Q90W22 | FGVVLFCLLWTEGAQAGLTF | Negative |
| Q90W22 | AAIFGVVLFCLLWTEGAQAG | Negative |
| Q90W22 | LLWTEGAQAGLTFLSPADMQ | Negative |
| Q90W22 | GLTFLSPADMQKIAERQSQN | Negative |
| Q90W22 | WTEGAQAGLTFLSPADMQKI | Negative |
| Q90W22 | AIFGVVLFCLLWTEGAQAGL | Negative |
| Q90W22 | AGLTFLSPADMQKIAERQSQ | Negative |
| Q90W22 | CLLWTEGAQAGLTFLSPADM | Negative |
| Q90W22 | QAGLTFLSPADMQKIAERQS | Negative |
| Q90W22 | VVLFCLLWTEGAQAGLTFLS | Negative |
| Q90W22 | LTFLSPADMQKIAERQSQNK | Negative |
| Q90W39 | MIKIMTKKNAIPFYSSYGCY | Negative |
| Q90W39 | LLQFNKMIKIMTKKNAIPFY | Negative |
| Q90W39 | LQFNKMIKIMTKKNAIPFYS | Negative |
| Q90W39 | MRTLWIVAVLLLGVGNLLQ  | Negative |
| Q90W39 | LLLGVEGNLLQFNKMIKIMT | Negative |
| Q90W39 | FNKMIKIMTKKNAIPFYSSY | Negative |
| Q90W39 | IVAVLLLGVGNLLQFNKMI  | Negative |
| Q90W39 | LGVEGNLLQFNKMIKIMTKK | Negative |
| Q90W39 | GVEGNLLQFNKMIKIMTKKN | Negative |
| Q90W39 | AVLLLGVGNLLQFNKMIKI  | Negative |
| Q90W39 | LLGVGNLLQFNKMIKIMTK  | Negative |
| Q90W39 | MTKKNAIPFYSSYGCYCGWG | Negative |
| Q90W39 | VAVLLLGVGNLLQFNKMIK  | Negative |
| Q90W39 | TKKNAIPFYSSYGCYCGWGG | Negative |
| Q90W39 | NLLQFNKMIKIMTKKNAIPF | Negative |
| Q90W39 | QFNKMIKIMTKKNAIPFYSS | Negative |
| Q90W39 | EGNLLQFNKMIKIMTKKNAI | Negative |
| Q90W39 | NKMIKIMTKKNAIPFYSSYG | Negative |
| Q90W39 | IKIMTKKNAIPFYSSYGCYC | Negative |
| Q90W39 | KMIKIMTKKNAIPFYSSYGC | Negative |
| Q90W39 | KKNAIPFYSSYGCYCGWGGQ | Negative |
| Q90W39 | LWIVAVLLLGVGNLLQFNK  | Negative |
| Q90W39 | VEGNLLQFNKMIKIMTKKNA | Negative |
| Q90W39 | VLLLGVEGNLLQFNKMIKIM | Negative |
| Q90W39 | KIMTKKNAIPFYSSYGCYCG | Negative |
| Q90W39 | TLWIVAVLLLGVGNLLQFN  | Negative |
| Q90W39 | WIVAVLLLGVGNLLQFNKM  | Negative |
| Q90W39 | IMTKKNAIPFYSSYGCYCGW | Negative |

|        |                      |          |
|--------|----------------------|----------|
| Q90W39 | GNLLQFNKMIKIMTKKNAIP | Negative |
| Q90WA0 | PELCELPPDTGPCRVRFPSF | Negative |
| Q90WA0 | WEVLTPVSSKDRPELCELPP | Negative |
| Q90WA0 | ELCELPPDTGPCRVRFPSFY | Negative |
| Q90WA0 | SSGGLLLLLGLLTLWEVLTP | Negative |
| Q90WA0 | MSSGGLLLLLGLLTLWEVLT | Negative |
| Q90WA0 | RPELCELPPDTGPCRVRFPS | Negative |
| Q90WA0 | SSKDRPELCELPPDTGPCRV | Negative |
| Q90WA0 | GLLTLWEVLTPVSSKDRPEL | Negative |
| Q90WA0 | TPVSSKDRPELCELPPDTGP | Negative |
| Q90WA0 | VSSKDRPELCELPPDTGPCR | Negative |
| Q90WA0 | GLLLLLGLLTLWEVLTPVSS | Negative |
| Q90WA0 | KDRPELCELPPDTGPCRVRF | Negative |
| Q90WA0 | LLLLLGLLTLWEVLTPVSSK | Negative |
| Q90WA0 | LLTLWEVLTPVSSKDRPELC | Negative |
| Q90WA0 | LTPVSSKDRPELCELPPDTG | Negative |
| Q90WA0 | DRPELCELPPDTGPCRVRFP | Negative |
| Q90WA0 | PVSSKDRPELCELPPDTGPC | Negative |
| Q90WA0 | SGGLLLLLGLLTLWEVLTPV | Negative |
| Q90WA0 | GGLLLLLGLLTLWEVLTPVS | Negative |
| Q90WA0 | VLTPVSSKDRPELCELPPDT | Negative |
| Q90WA0 | LCELPPDTGPCRVRFPSFYY | Negative |
| Q90WA0 | LTLWEVLTPVSSKDRPELCE | Negative |
| Q90WA0 | EVLTPVSSKDRPELCELPPD | Negative |
| Q90WA0 | LLLGLLTLWEVLTPVSSKD  | Negative |
| Q90WA0 | LWEVLTPVSSKDRPELCELP | Negative |
| Q90WA0 | LLGLLTLWEVLTPVSSKDR  | Negative |
| Q90WA0 | LLGLLTLWEVLTPVSSKDRP | Negative |
| Q90WA0 | TLWEVLTPVSSKDRPELCEL | Negative |
| Q90WA0 | SKDRPELCELPPDTGPCRVR | Negative |
| Q90WA1 | EVLTPVSSKDRPDFCELPAD | Negative |
| Q90WA1 | VSSKDRPDFCELPADTGPCR | Negative |
| Q90WA1 | LWEVLTPVSSKDRPDFCELP | Negative |
| Q90WA1 | GLLLLLGLLTLWEVLTPVSS | Negative |
| Q90WA1 | LLLGLLTLWEVLTPVSSKD  | Negative |
| Q90WA1 | LLTLWEVLTPVSSKDRPDFC | Negative |
| Q90WA1 | LLGLLTLWEVLTPVSSKDR  | Negative |
| Q90WA1 | PVSSKDRPDFCELPADTGPC | Negative |
| Q90WA1 | MSSGGLLLLLGLLTLWEVLT | Negative |
| Q90WA1 | GGLLLLLGLLTLWEVLTPVS | Negative |
| Q90WA1 | SKDRPDFCELPADTGPCRVR | Negative |
| Q90WA1 | DFCELPADTGPCRVRFPSFY | Negative |
| Q90WA1 | FCELPADTGPCRVRFPSFYY | Negative |
| Q90WA1 | PDFCELPADTGPCRVRFPSF | Negative |
| Q90WA1 | LTLWEVLTPVSSKDRPDFCE | Negative |
| Q90WA1 | WEVLTPVSSKDRPDFCELPA | Negative |

|        |                       |          |
|--------|-----------------------|----------|
| Q90WA1 | TLWEVLTPVSSKDRPDFCEL  | Negative |
| Q90WA1 | KDRPDFCELPADTGPCRVRF  | Negative |
| Q90WA1 | SGGLLLLLLGLLTLWEVLTPV | Negative |
| Q90WA1 | LLGLLTLWEVLTPVSSKDRP  | Negative |
| Q90WA1 | RPDFCELPADTGPCRVRFPS  | Negative |
| Q90WA1 | TPVSSKDRPDFCELPADTGP  | Negative |
| Q90WA1 | SSKDRPDFCELPADTGPCRV  | Negative |
| Q90WA1 | GLLTLWEVLTPVSSKDRPDF  | Negative |
| Q90WA1 | VLTPVSSKDRPDFCELPADT  | Negative |
| Q90WA1 | DRPDFCELPADTGPCRVRF   | Negative |
| Q90WA1 | LTPVSSKDRPDFCELPADTG  | Negative |
| Q90WA1 | SSGGLLLLLLGLLTLWEVLTP | Negative |
| Q90WA1 | LLLLLGLLTLWEVLTPVSSK  | Negative |
| Q90WJ8 | FLCVAVLSSMALVSHGAVLG  | Negative |
| Q90WJ8 | SSMALVSHGAVLGLCEGACP  | Negative |
| Q90WJ8 | SMALVSHGAVLGLCEGACPE  | Negative |
| Q90WJ8 | VAVLSSMALVSHGAVLGLCE  | Negative |
| Q90WJ8 | AFLCVAVLSSMALVSHGAVL  | Negative |
| Q90WJ8 | FKLPAFLCVAVLSSMALVSH  | Negative |
| Q90WJ8 | AVLGLCEGACPEGWVEHKNR  | Negative |
| Q90WJ8 | CEGACPEGWVEHKNRCYLHV  | Negative |
| Q90WJ8 | AVLSSMALVSHGAVLGLCEG  | Negative |
| Q90WJ8 | VSHGAVLGLCEGACPEGWVE  | Negative |
| Q90WJ8 | LVSHGAVLGLCEGACPEGWV  | Negative |
| Q90WJ8 | MALVSHGAVLGLCEGACPEG  | Negative |
| Q90WJ8 | SFKLPAFLCVAVLSSMALVS  | Negative |
| Q90WJ8 | CVAVLSSMALVSHGAVLGLC  | Negative |
| Q90WJ8 | LSSMALVSHGAVLGLCEGAC  | Negative |
| Q90WJ8 | VSFKLPAFLCVAVLSSMALV  | Negative |
| Q90WJ8 | SHGAVLGLCEGACPEGWVEH  | Negative |
| Q90WJ8 | GAVLGLCEGACPEGWVEHKN  | Negative |
| Q90WJ8 | GLCEGACPEGWVEHKNRCYL  | Negative |
| Q90WJ8 | LCEGACPEGWVEHKNRCYLH  | Negative |
| Q90WJ8 | VLGLCEGACPEGWVEHKNRC  | Negative |
| Q90WJ8 | VLSSMALVSHGAVLGLCEGA  | Negative |
| Q90WJ8 | LGLCEGACPEGWVEHKNRCY  | Negative |
| Q90WJ8 | PAFLCVAVLSSMALVSHGAV  | Negative |
| Q90WJ8 | KLPAFLCVAVLSSMALVSHG  | Negative |
| Q90WJ8 | HGAVLGLCEGACPEGWVEHK  | Negative |
| Q90WJ8 | MVSFKLPAFLCVAVLSSMAL  | Negative |
| Q90WJ8 | LPAFLCVAVLSSMALVSHGA  | Negative |
| Q90WJ8 | ALVSHGAVLGLCEGACPEGW  | Negative |
| Q90WJ9 | APEECHKLTKPVLKADVQNV  | Negative |
| Q90WJ9 | VLLLMLAVLGIRAAPAPEEC  | Negative |
| Q90WJ9 | LMLAVLGIRAAPAPEECHKL  | Negative |
| Q90WJ9 | LGIRAAPAPEECHKLTKPVL  | Negative |

|        |                      |          |
|--------|----------------------|----------|
| Q90WJ9 | PEECHKLTKPVLKADVQNV  | Negative |
| Q90WJ9 | AVLGIRAAPAECHKLTKP   | Negative |
| Q90WJ9 | AVPGVVLLMLAVLGIRAAP  | Negative |
| Q90WJ9 | LTKPVLKADVQNVSGDWVLV | Negative |
| Q90WJ9 | APAECHKLTKPVLKADVQ   | Negative |
| Q90WJ9 | EECHKLTKPVLKADVQNVSG | Negative |
| Q90WJ9 | IRAAPAECHKLTKPVLKA   | Negative |
| Q90WJ9 | HKLTKPVLKADVQNVSGDWV | Negative |
| Q90WJ9 | GIRAAPAECHKLTKPVLK   | Negative |
| Q90WJ9 | GAVPGVVLLMLAVLGIRAA  | Negative |
| Q90WJ9 | VLGIRAAPAECHKLTKPV   | Negative |
| Q90WJ9 | MGAVPGVVLLMLAVLGIRA  | Negative |
| Q90WJ9 | LAVLGIRAAPAECHKLT    | Negative |
| Q90WJ9 | LLLMLAVLGIRAAPAECH   | Negative |
| Q90WJ9 | VVLLMLAVLGIRAAPAE    | Negative |
| Q90WJ9 | VPGVVLLMLAVLGIRAAPA  | Negative |
| Q90WJ9 | MLAVLGIRAAPAECHKLT   | Negative |
| Q90WJ9 | PAPECHKLTKPVLKADVQN  | Negative |
| Q90WJ9 | PGVVLLMLAVLGIRAAPAP  | Negative |
| Q90WJ9 | KLTKPVLKADVQNVSGDWVL | Negative |
| Q90WJ9 | RAAPAECHKLTKPVLKAD   | Negative |
| Q90WJ9 | CHKLTKPVLKADVQNVSGDW | Negative |
| Q90WJ9 | LLMLAVLGIRAAPAECHK   | Negative |
| Q90WJ9 | ECHKLTKPVLKADVQNVSGD | Negative |
| Q90WJ9 | AAPAECHKLTKPVLKADV   | Negative |
| Q90Y77 | MAVLLVGVEGHLLQFRKMIK | Negative |
| Q90Y77 | IKKMTGKEPIVSYAFYGCYC | Negative |
| Q90Y77 | KMIKKMTGKEPIVSYAFYGC | Negative |
| Q90Y77 | VGVEGHLLQFRKMIKKMTGK | Negative |
| Q90Y77 | QFRKMIKKMTGKEPIVSYAF | Negative |
| Q90Y77 | MIKKMTGKEPIVSYAFYGCY | Negative |
| Q90Y77 | TGKEPIVSYAFYGCYCGKGG | Negative |
| Q90Y77 | LVGVEGHLLQFRKMIKKMTG | Negative |
| Q90Y77 | TLWIMAVLLVGVEGHLLQFR | Negative |
| Q90Y77 | FRKMIKKMTGKEPIVSYAFY | Negative |
| Q90Y77 | GHLLQFRKMIKKMTGKEPIV | Negative |
| Q90Y77 | EGHLLQFRKMIKKMTGKEPI | Negative |
| Q90Y77 | MTGKEPIVSYAFYGCYCGKG | Negative |
| Q90Y77 | LWIMAVLLVGVEGHLLQFRK | Negative |
| Q90Y77 | MRTLWIMAVLLVGVEGHLLQ | Negative |
| Q90Y77 | KMTGKEPIVSYAFYGCYCGK | Negative |
| Q90Y77 | KKMTGKEPIVSYAFYGCYCG | Negative |
| Q90Y77 | LLVGVEGHLLQFRKMIKKMT | Negative |
| Q90Y77 | VEGHLLQFRKMIKKMTGKEP | Negative |
| Q90Y77 | HLLQFRKMIKKMTGKEPIVS | Negative |
| Q90Y77 | RKMIKKMTGKEPIVSYAFYG | Negative |

|        |                      |          |
|--------|----------------------|----------|
| Q90Y77 | LQFRKMIKKMTGKEPIVSYA | Negative |
| Q90Y77 | IMAVLLVGVEGHLLQFRKMI | Negative |
| Q90Y77 | AVLLVGVEGHLLQFRKMIKK | Negative |
| Q90Y77 | VLLVGVEGHLLQFRKMIKKM | Negative |
| Q90Y77 | LLQFRKMIKKMTGKEPIVSY | Negative |
| Q90Y77 | WIMAVLLVGVEGHLLQFRKM | Negative |
| Q90Y77 | GVEGHLLQFRKMIKKMTGKE | Negative |
| Q90Y77 | GKEPIVSYAFYGCYCGKGGR | Negative |
| Q90ZY0 | FLMIAIFVLMVEPGECGWS  | Negative |
| Q90ZY0 | PGECGWGSFFKKAHVKGHV  | Negative |
| Q90ZY0 | VEPGECGWGSFFKKAHVKGK | Negative |
| Q90ZY0 | VLMVEPGECGWGSFFKKAH  | Negative |
| Q90ZY0 | ATFLMIAIFVLMVEPGECGW | Negative |
| Q90ZY0 | MKFTATFLMIAIFVLMVEPG | Negative |
| Q90ZY0 | WGSFFKKAHVKGKGVGKAAL | Negative |
| Q90ZY0 | FKKAHVKGKGVGKAALTHYL | Negative |
| Q90ZY0 | FTATFLMIAIFVLMVEPGEC | Negative |
| Q90ZY0 | AIFVLMVEPGECGWGSFFKK | Negative |
| Q90ZY0 | ECGWGSFFKKAHVKGKGVGK | Negative |
| Q90ZY0 | GWGSFFKKAHVKGKGVGKAA | Negative |
| Q90ZY0 | KAAHVKGKGVGKAALTHYLG | Negative |
| Q90ZY0 | KKAAHVKGKGVGKAALTHYL | Negative |
| Q90ZY0 | IFVLMVEPGECGWGSFFKKA | Negative |
| Q90ZY0 | TATFLMIAIFVLMVEPGECG | Negative |
| Q90ZY0 | EPGECGWGSFFKKAHVKGH  | Negative |
| Q90ZY0 | GSFFKKAHVKGKGVGKAALT | Negative |
| Q90ZY0 | SFFKKAHVKGKGVGKAALTH | Negative |
| Q90ZY0 | MIAIFVLMVEPGECGWGSFF | Negative |
| Q90ZY0 | GECGWGSFFKKAHVKGKGVG | Negative |
| Q90ZY0 | CGWGSFFKKAHVKGKGVGKA | Negative |
| Q90ZY0 | MVEPGECGWGSFFKKAHV   | Negative |
| Q90ZY0 | TFLMIAIFVLMVEPGECGWG | Negative |
| Q90ZY0 | LMVEPGECGWGSFFKKAHV  | Negative |
| Q90ZY0 | IAIFVLMVEPGECGWGSFFK | Negative |
| Q90ZY0 | FFKKAHVKGKGVGKAALTHY | Negative |
| Q90ZY0 | KFTATFLMIAIFVLMVEPGE | Negative |
| Q90ZY0 | FVLMVEPGECGWGSFFKKA  | Negative |
| Q91055 | PKLPGLMTSNPDQQTEITDK | Negative |
| Q91055 | LAAMLHQSEGEASPKLPGLM | Negative |
| Q91055 | LHQSEGEASPKLPGLMTSNP | Negative |
| Q91055 | PGLMTSNPDQQTEITDKHNN | Negative |
| Q91055 | LPGLMTSNPDQQTEITDKHN | Negative |
| Q91055 | LLSLYLCLAAMLHQSEGEAS | Negative |
| Q91055 | SPKLPGLMTSNPDQQTEITD | Negative |
| Q91055 | GLMTSNPDQQTEITDKHNNL | Negative |
| Q91055 | GEASPKLPGLMTSNPDQQTE | Negative |

|        |                       |          |
|--------|-----------------------|----------|
| Q91055 | SEGEASPKLPGLMTSNPDQQ  | Negative |
| Q91055 | EASPKLPGLMTSNPDQQTEI  | Negative |
| Q91055 | QSEGEASPKLPGLMTSNPDQ  | Negative |
| Q91055 | AMLHQSEGEASPKLPGLMTS  | Negative |
| Q91055 | TSNPDQQTEITDKHNNLRRI  | Negative |
| Q91055 | LYLCLAAMLHQSEGEASPKL  | Negative |
| Q91055 | LMTSNPDQQTEITDKHNNLR  | Negative |
| Q91055 | MILLSLYLCLAAMLHQSEGE  | Negative |
| Q91055 | LCLAAMLHQSEGEASPKLPG  | Negative |
| Q91055 | ILLSLYLCLAAMLHQSEGEA  | Negative |
| Q91055 | ASPKLPGLMTSNPDQQTEIT  | Negative |
| Q91055 | YLCLAAMLHQSEGEASPKLP  | Negative |
| Q91055 | KLPGLMTSNPDQQTEITDKH  | Negative |
| Q91055 | CLAAMLHQSEGEASPKLPGL  | Negative |
| Q91055 | HQSEGEASPKLPGLMTSNPD  | Negative |
| Q91055 | AAMLHQSEGEASPKLPGLMT  | Negative |
| Q91055 | MTSNPDQQTEITDKHNNLRR  | Negative |
| Q91055 | MLHQSEGEASPKLPGLMTSN  | Negative |
| Q91055 | LSLYLCLAAMLHQSEGEASP  | Negative |
| Q91055 | EGEASPKLPGLMTSNPDQQT  | Negative |
| Q91XA9 | AYNLICYFTNWAQYRPGLGS  | Negative |
| Q91XA9 | TGLALLLNAQLGSAYNLICY  | Negative |
| Q91XA9 | LLVTGLALLLNAQLGSAYNL  | Negative |
| Q91XA9 | LVTGLALLLNAQLGSAYNLI  | Negative |
| Q91XA9 | ALLLNAQLGSAYNLICYFTN  | Negative |
| Q91XA9 | TNWAQYRPGLGSFKPDDINP  | Negative |
| Q91XA9 | CYFTNWAQYRPGLGSFKPDD  | Negative |
| Q91XA9 | ICYFTNWAQYRPGLGSFKPD  | Negative |
| Q91XA9 | MAKLLLVGTGLALLLNAQLGS | Negative |
| Q91XA9 | LICYFTNWAQYRPGLGSFKP  | Negative |
| Q91XA9 | LLLNAQLGSAYNLICYFTNW  | Negative |
| Q91XA9 | LLLVGTGLALLLNAQLGSAYN | Negative |
| Q91XA9 | YNLICYFTNWAQYRPGLGSF  | Negative |
| Q91XA9 | KLLLVGTGLALLLNAQLGSAY | Negative |
| Q91XA9 | NAQLGSAYNLICYFTNWAQY  | Negative |
| Q91XA9 | LGSAYNLICYFTNWAQYRPG  | Negative |
| Q91XA9 | GSAYNLICYFTNWAQYRPGL  | Negative |
| Q91XA9 | GLALLLNAQLGSAYNLICYF  | Negative |
| Q91XA9 | LALLLNAQLGSAYNLICYFT  | Negative |
| Q91XA9 | AKLLLVGTGLALLLNAQLGSA | Negative |
| Q91XA9 | QLGSAYNLICYFTNWAQYRP  | Negative |
| Q91XA9 | NLICYFTNWAQYRPGLGSFK  | Negative |
| Q91XA9 | YFTNWAQYRPGLGSFKPDDI  | Negative |
| Q91XA9 | SAYNLICYFTNWAQYRPGLG  | Negative |
| Q91XA9 | NWAQYRPGLGSFKPDDINPC  | Negative |
| Q91XA9 | LNAQLGSAYNLICYFTNWAQ  | Negative |

|        |                       |          |
|--------|-----------------------|----------|
| Q91XA9 | AQLGSAYNLCIFYFTNWAQYR | Negative |
| Q91XA9 | LLNAQLGSAYNLCIFYFTNWA | Negative |
| Q91XA9 | FTNWAQYRPGLSFKPDDIN   | Negative |
| Q924B5 | IQYILLVFLLIASHWTLVQN  | Negative |
| Q924B5 | SHWTLVQNIYCEVSRTLSLE  | Negative |
| Q924B5 | ACRIQYILLVFLLIASHWTL  | Negative |
| Q924B5 | CRIQYILLVFLLIASHWTLV  | Negative |
| Q924B5 | WTLVQNIYCEVSRTLSLEDN  | Negative |
| Q924B5 | LLIASHWTLVQNIYCEVSRT  | Negative |
| Q924B5 | IASHWTLVQNIYCEVSRTLS  | Negative |
| Q924B5 | MGACRIQYILLVFLLIASHW  | Negative |
| Q924B5 | NIYCEVSRTLSLEDNPSGTF  | Negative |
| Q924B5 | EVSRTLSLEDNPSGTFNWT   | Negative |
| Q924B5 | ILLVFLLIASHWTLVQNIYC  | Negative |
| Q924B5 | GACRIQYILLVFLLIASHWT  | Negative |
| Q924B5 | LLVFLLIASHWTLVQNIYCE  | Negative |
| Q924B5 | VSRTLSLEDNPSGTFNWT    | Negative |
| Q924B5 | YCEVSRTLSLEDNPSGTFNW  | Negative |
| Q924B5 | QNIYCEVSRTLSLEDNPSGT  | Negative |
| Q924B5 | LIASHWTLVQNIYCEVSRTL  | Negative |
| Q924B5 | IYCEVSRTLSLEDNPSGTFN  | Negative |
| Q924B5 | CEVSRTLSLEDNPSGTFNWT  | Negative |
| Q924B5 | FLLIASHWTLVQNIYCEVSR  | Negative |
| Q924B5 | LVQNIYCEVSRTLSLEDNPS  | Negative |
| Q924B5 | QYILLVFLLIASHWTLVQNI  | Negative |
| Q924B5 | VFLLIASHWTLVQNIYCEVS  | Negative |
| Q924B5 | ASHWTLVQNIYCEVSRTLSL  | Negative |
| Q924B5 | YILLVFLLIASHWTLVQNIY  | Negative |
| Q924B5 | VQNIYCEVSRTLSLEDNPSG  | Negative |
| Q924B5 | TLVQNIYCEVSRTLSLEDNP  | Negative |
| Q924B5 | HWTLVQNIYCEVSRTLSLED  | Negative |
| Q924B5 | RIQYILLVFLLIASHWTLVQ  | Negative |
| Q92563 | ALAEGDAKGLKEGETPGNFM  | Negative |
| Q92563 | CGRLVLPLLLLAAAALAEGD  | Negative |
| Q92563 | LAAAALAEGDAKGLKEGETP  | Negative |
| Q92563 | DAKGLKEGETPGNFMEDEQW  | Negative |
| Q92563 | GRLVLPLLLLAAAALAEGDA  | Negative |
| Q92563 | PLLLLAAAALAEGDAKGLKE  | Negative |
| Q92563 | APGCGRLVLPLLLLAAAALA  | Negative |
| Q92563 | LVLPLLLLAAAALAEGDAKG  | Negative |
| Q92563 | GCGRLVLPLLLLAAAALAEG  | Negative |
| Q92563 | LLLAAAALAEGDAKGLKEGE  | Negative |
| Q92563 | LLAAAALAEGDAKGLKEGET  | Negative |
| Q92563 | LAEGDAKGLKEGETPGNFME  | Negative |
| Q92563 | PGCGRLVLPLLLLAAAALAE  | Negative |
| Q92563 | LLLAAAALAEGDAKGLKEG   | Negative |



|        |                      |          |
|--------|----------------------|----------|
| Q92563 | RAPGCGRLVLPLLLAAAAAL | Negative |
| Q92563 | KGLKEGETPGNFMEDQWLS  | Negative |
| Q92563 | AKGLKEGETPGNFMEDQWL  | Negative |
| Q92563 | LPLLLAAAAALAEGLKGLK  | Negative |
| Q92563 | KEGETPGNFMEDQWLSSIS  | Negative |
| Q92563 | AEGDAKGLKEGETPGNFMED | Negative |
| Q92563 | GLKEGETPGNFMEDQWLSS  | Negative |
| Q92563 | MRAPGCGRLVLPLLLAAAA  | Negative |
| Q92563 | EGDAKGLKEGETPGNFMED  | Negative |
| Q92563 | AAALAEGLKGLKEGETPGN  | Negative |
| Q92563 | VLPLLLAAAAALAEGLKGL  | Negative |
| Q92563 | AAAAALAEGLKGLKEGETPG | Negative |
| Q92563 | LKEGETPGNFMEDQWLSSI  | Negative |
| Q92563 | GDAKGLKEGETPGNFMEDQ  | Negative |
| Q92563 | AALAEGLKGLKEGETPGNF  | Negative |
| Q92583 | ARGTNVGRECCLEYFKGAIP | Negative |
| Q92583 | KMLALVTLLLGASLQHIHAA | Negative |
| Q92583 | APLKMLALVTLLLGASLQHI | Negative |
| Q92583 | GTNVGRECCLEYFKGAIPLR | Negative |
| Q92583 | HIHAARGTNVGRECCLEYFK | Negative |
| Q92583 | SLQHIHAARGTNVGRECCLE | Negative |
| Q92583 | VTLLLGASLQHIHAARGTNV | Negative |
| Q92583 | TNVGRECCLEYFKGAIPLRK | Negative |
| Q92583 | QHIHAARGTNVGRECCLEYF | Negative |
| Q92583 | VGRECCLEYFKGAIPLRKLK | Negative |
| Q92583 | LLLGASLQHIHAARGTNVGR | Negative |
| Q92583 | MLALVTLLLGASLQHIHAAR | Negative |
| Q92583 | GASLQHIHAARGTNVGRECC | Negative |
| Q92583 | LLGASLQHIHAARGTNVGRE | Negative |
| Q92583 | RGTNVGRECCLEYFKGAIPL | Negative |
| Q92583 | AARGTNVGRECCLEYFKGAI | Negative |
| Q92583 | LALVTLLLGASLQHIHAARG | Negative |
| Q92583 | PLKMLALVTLLLGASLQHIH | Negative |
| Q92583 | ASLQHIHAARGTNVGRECC  | Negative |
| Q92583 | LQHIHAARGTNVGRECCLEY | Negative |
| Q92583 | IHAARGTNVGRECCLEYFKG | Negative |
| Q92583 | HAARGTNVGRECCLEYFKGA | Negative |
| Q92583 | MAPLKMLALVTLLLGASLQH | Negative |
| Q92583 | LKMLALVTLLLGASLQHIHA | Negative |
| Q92583 | TLLLGASLQHIHAARGTNVG | Negative |
| Q92583 | ALVTLLLGASLQHIHAARGT | Negative |
| Q92583 | GRECCLEYFKGAIPLRKLKT | Negative |
| Q92583 | NVGRECCLEYFKGAIPLRKL | Negative |
| Q92583 | LGASLQHIHAARGTNVGREC | Negative |
| Q92765 | VCGSPGGMLLLRAGLLALAA | Negative |
| Q92765 | GGMLLLRAGLLALACLRL   | Negative |

|        |                      |          |
|--------|----------------------|----------|
| Q92765 | LLRAGLLALAALCLLRVPG  | Negative |
| Q92765 | AGLLALAALCLLRVPGARAA | Negative |
| Q92765 | LCLLRVPGARAAACEPVRIP | Negative |
| Q92765 | GSPGGMLLLRAGLLALAALC | Negative |
| Q92765 | PGGMLLLRAGLLALAALCLL | Negative |
| Q92765 | PGARAAACEPVRIPLCKSLP | Negative |
| Q92765 | AALCLLRVPGARAAACEPVR | Negative |
| Q92765 | LALAALCLLRVPGARAAACE | Negative |
| Q92765 | GMLLLRAGLLALAALCLLRV | Negative |
| Q92765 | GLLALAALCLLRVPGARAAA | Negative |
| Q92765 | VPGARAAACEPVRIPLCKSL | Negative |
| Q92765 | LRAGLLALAALCLLRVPGAR | Negative |
| Q92765 | MVCGSPGGMLLLRAGLLALA | Negative |
| Q92765 | LLALAALCLLRVPGARAAAC | Negative |
| Q92765 | SPGGMLLLRAGLLALAALCL | Negative |
| Q92765 | LAALCLLRVPGARAAACEPV | Negative |
| Q92765 | LLRAGLLALAALCLLRVPGA | Negative |
| Q92765 | ARAAACEPVRIPLCKSLPWN | Negative |
| Q92765 | LLRVPGARAAACEPVRIPLC | Negative |
| Q92765 | RAGLLALAALCLLRVPGARA | Negative |
| Q92765 | LRVPGARAAACEPVRIPLCK | Negative |
| Q92765 | MLLLRAGLLALAALCLLRVP | Negative |
| Q92765 | RVPGARAAACEPVRIPLCKS | Negative |
| Q92765 | GARAAACEPVRIPLCKSLPW | Negative |
| Q92765 | CLLRVPGARAAACEPVRIPL | Negative |
| Q92765 | CGSPGGMLLLRAGLLALAAL | Negative |
| Q92765 | ALCLLRVPGARAAACEPVRI | Negative |
| Q934G3 | NALAVSIDYRHEMQDTAQAG | Negative |
| Q934G3 | YRHEMQDTAQAGHKDRLLIS | Negative |
| Q934G3 | TLAVASLVSVNALAVSIDYR | Negative |
| Q934G3 | RHEMQDTAQAGHKDRLLISH | Negative |
| Q934G3 | DYRHEMQDTAQAGHKDRLLI | Negative |
| Q934G3 | LAVASLVSVNALAVSIDYRH | Negative |
| Q934G3 | VSVNALAVSIDYRHEMQDTA | Negative |
| Q934G3 | VSIDYRHEMQDTAQAGHKDR | Negative |
| Q934G3 | SVNALAVSIDYRHEMQDTAQ | Negative |
| Q934G3 | MKIKLLTLAVASLVSVNALA | Negative |
| Q934G3 | KLLTLAVASLVSVNALAVSI | Negative |
| Q934G3 | KIKLLTLAVASLVSVNALAV | Negative |
| Q934G3 | ALAVSIDYRHEMQDTAQAGH | Negative |
| Q934G3 | AVASLVSVNALAVSIDYRHE | Negative |
| Q934G3 | LAVSIDYRHEMQDTAQAGHK | Negative |
| Q934G3 | IKLLTLAVASLVSVNALAVS | Negative |
| Q934G3 | ASLVSVNALAVSIDYRHEMQ | Negative |
| Q934G3 | LLTLAVASLVSVNALAVSID | Negative |
| Q934G3 | AVSIDYRHEMQDTAQAGHKD | Negative |

|        |                      |          |
|--------|----------------------|----------|
| Q934G3 | LVSVNALAVSIDYRHEMQDT | Negative |
| Q934G3 | IDYRHEMQDTAQAGHKDRLL | Negative |
| Q934G3 | EMQDTAQAGHKDRLLISHRF | Negative |
| Q934G3 | SLVSVNALAVSIDYRHEMQD | Negative |
| Q934G3 | SIDYRHEMQDTAQAGHKDRL | Negative |
| Q934G3 | MQDTAQAGHKDRLLISHRFA | Negative |
| Q934G3 | VASLVSVNALAVSIDYRHEM | Negative |
| Q934G3 | VNALAVSIDYRHEMQDTAQA | Negative |
| Q934G3 | QDTAQAGHKDRLLISHRFAN | Negative |
| Q934G3 | HEMQDTAQAGHKDRLLISHR | Negative |
| Q939U1 | LVCGGAFSGAAVSAGPDDPL | Negative |
| Q939U1 | GAFSGAAVSAGPDDPLVING | Negative |
| Q939U1 | GAAVSAGPDDPLVINGEIEI | Negative |
| Q939U1 | VAAALVCGGAFSGAAVSAGP | Negative |
| Q939U1 | LVAAALVCGGAFSGAAVSAG | Negative |
| Q939U1 | RLVAAALVCGGAFSGAAVSA | Negative |
| Q939U1 | TMTGRLVAAALVCGGAFSGA | Negative |
| Q939U1 | GGAFSGAAVSAGPDDPLVIN | Negative |
| Q939U1 | CGGAFSGAAVSAGPDDPLVI | Negative |
| Q939U1 | AAVSAGPDDPLVINGEIEIV | Negative |
| Q939U1 | VSAGPDDPLVINGEIEIVTR | Negative |
| Q939U1 | TGRLVAAALVCGGAFSGAAV | Negative |
| Q939U1 | AVSAGPDDPLVINGEIEIVT | Negative |
| Q939U1 | AGPDDPLVINGEIEIVTRAP | Negative |
| Q939U1 | SGAAVSAGPDDPLVINGEIE | Negative |
| Q939U1 | KTMTGRLVAAALVCGGAFSG | Negative |
| Q939U1 | MKTMTGRLVAAALVCGGAFS | Negative |
| Q939U1 | GPDDPLVINGEIEIVTRAPT | Negative |
| Q939U1 | DDPLVINGEIEIVTRAPTPA | Negative |
| Q939U1 | VCGGAFSGAAVSAGPDDPLV | Negative |
| Q939U1 | MTGRLVAAALVCGGAFSGAA | Negative |
| Q939U1 | FSGAAVSAGPDDPLVINGEI | Negative |
| Q939U1 | AAALVCGGAFSGAAVSAGPD | Negative |
| Q939U1 | PDDPLVINGEIEIVTRAPTP | Negative |
| Q939U1 | AFSGAAVSAGPDDPLVINGE | Negative |
| Q939U1 | GRLVAAALVCGGAFSGAAVS | Negative |
| Q939U1 | AALVCGGAFSGAAVSAGPDD | Negative |
| Q939U1 | SAGPDDPLVINGEIEIVTRA | Negative |
| Q939U1 | DPLVINGEIEIVTRAPTPAH | Negative |
| Q93LJ4 | LLMCSTTFADSVTSVSLGAL | Negative |
| Q93LJ4 | LMCSTTFADSVTSVSLGALL | Negative |
| Q93LJ4 | LCSLLMCSTTFADSVTSVSL | Negative |
| Q93LJ4 | LGALLTALNERMLLMKDVAA | Negative |
| Q93LJ4 | VTSVSLGALLTALNERMLLM | Negative |
| Q93LJ4 | HIAIFLCSLLMCSTTFADSV | Negative |
| Q93LJ4 | MIRHIAIFLCSLLMCSTTFA | Negative |

|        |                      |          |
|--------|----------------------|----------|
| Q93LJ4 | IFLCSLLMCSTTFADSVTSV | Negative |
| Q93LJ4 | VSLGALLTALNERMLLMKDV | Negative |
| Q93LJ4 | TFADSVTSVSLGALLTALNE | Negative |
| Q93LJ4 | DSVTSVSLGALLTALNERML | Negative |
| Q93LJ4 | STTFADSVTSVSLGALLTAL | Negative |
| Q93LJ4 | SLLMCSTTFADSVTSVSLGA | Negative |
| Q93LJ4 | RHIAIFLCSLLMCSTTFADS | Negative |
| Q93LJ4 | ADSVTSVSLGALLTALNERM | Negative |
| Q93LJ4 | GALLTALNERMLLMKDVAAY | Negative |
| Q93LJ4 | IAIFLCSLLMCSTTFADSVT | Negative |
| Q93LJ4 | SVSLGALLTALNERMLLMKD | Negative |
| Q93LJ4 | FLCSLLMCSTTFADSVTSVS | Negative |
| Q93LJ4 | MCSTTFADSVTSVSLGALLT | Negative |
| Q93LJ4 | TSVSLGALLTALNERMLLMK | Negative |
| Q93LJ4 | SVTSVSLGALLTALNERMLL | Negative |
| Q93LJ4 | CSTTFADSVTSVSLGALLTA | Negative |
| Q93LJ4 | CSLLMCSTTFADSVTSVSLG | Negative |
| Q93LJ4 | TTFADSVTSVSLGALLTALN | Negative |
| Q93LJ4 | FADSVTSVSLGALLTALNER | Negative |
| Q93LJ4 | SLGALLTALNERMLLMKDVA | Negative |
| Q93LJ4 | IRHIAIFLCSLLMCSTTFAD | Negative |
| Q93LJ4 | ALLTALNERMLLMKDVAAYK | Negative |
| Q93MW7 | ASAAVSAPRIQATDYVALGD | Negative |
| Q93MW7 | APRIQATDYVALGDSYSSGV | Negative |
| Q93MW7 | GASAAVSAPRIQATDYVALG | Negative |
| Q93MW7 | LALFGASAAVSAPRIQATDY | Negative |
| Q93MW7 | ALALFGASAAVSAPRIQATD | Negative |
| Q93MW7 | ATASALLLTPALALFGASAA | Negative |
| Q93MW7 | VSAPRIQATDYVALGDSYSS | Negative |
| Q93MW7 | LLTPALALFGASAAVSAPR  | Negative |
| Q93MW7 | TASALLLTPALALFGASAAV | Negative |
| Q93MW7 | PALALFGASAAVSAPRIQAT | Negative |
| Q93MW7 | LTPALALFGASAAVSAPRIQ | Negative |
| Q93MW7 | AVSAPRIQATDYVALGDSYS | Negative |
| Q93MW7 | LLTPALALFGASAAVSAPRI | Negative |
| Q93MW7 | LSRRAATASALLLTPALALF | Negative |
| Q93MW7 | SAPRIQATDYVALGDSYSSG | Negative |
| Q93MW7 | SRRAATASALLLTPALALFG | Negative |
| Q93MW7 | RRAATASALLLTPALALFGA | Negative |
| Q93MW7 | LFGASAAVSAPRIQATDYVA | Negative |
| Q93MW7 | SAAVSAPRIQATDYVALGDS | Negative |
| Q93MW7 | TPALALFGASAAVSAPRIQA | Negative |
| Q93MW7 | AATASALLLTPALALFGASA | Negative |
| Q93MW7 | RAATASALLLTPALALFGAS | Negative |
| Q93MW7 | ASALLLTPALALFGASAAVS | Negative |
| Q93MW7 | RLSRRAATASALLLTPALAL | Negative |

|        |                      |          |
|--------|----------------------|----------|
| Q93MW7 | ALLLTPALALFGASAAVSAP | Negative |
| Q93MW7 | SALLLTPALALFGASAAVSA | Negative |
| Q93MW7 | AAVSAPRIQATDYVALGDSY | Negative |
| Q93MW7 | FGASAAVSAPRIQATDYVAL | Negative |
| Q93MW7 | MRLSRRAATASALLLTPALA | Negative |
| Q942A7 | PDMLQDICVADYKSLQGPLR | Negative |
| Q942A7 | TVVLLASFAAVILSLAAPLL | Negative |
| Q942A7 | AKLPTVVLLASFAAVILSLA | Negative |
| Q942A7 | AGDPDMLQDICVADYKSLQG | Negative |
| Q942A7 | MAAKLPTVVLLASFAAVILS | Negative |
| Q942A7 | ASFAAVILSLAAPLLAGDPD | Negative |
| Q942A7 | SLAAPLLAGDPDMLQDICVA | Negative |
| Q942A7 | VVLLASFAAVILSLAAPLLA | Negative |
| Q942A7 | AVILSLAAPLLAGDPDMLQD | Negative |
| Q942A7 | KLPTVVLLASFAAVILSLAA | Negative |
| Q942A7 | PLLAGDPDMLQDICVADYKS | Negative |
| Q942A7 | FAAVILSLAAPLLAGDPDML | Negative |
| Q942A7 | APLLAGDPDMLQDICVADYK | Negative |
| Q942A7 | AAVILSLAAPLLAGDPDMLQ | Negative |
| Q942A7 | LLAGDPDMLQDICVADYKSL | Negative |
| Q942A7 | ILSLAAPLLAGDPDMLQDIC | Negative |
| Q942A7 | VILSLAAPLLAGDPDMLQDI | Negative |
| Q942A7 | LSLAAPLLAGDPDMLQDICV | Negative |
| Q942A7 | AAPLLAGDPDMLQDICVADY | Negative |
| Q942A7 | LASFAAVILSLAAPLLAGDP | Negative |
| Q942A7 | PTVVLLASFAAVILSLAAPL | Negative |
| Q942A7 | AAKLPTVVLLASFAAVILSL | Negative |
| Q942A7 | LPTVVLLASFAAVILSLAAP | Negative |
| Q942A7 | DPDMLQDICVADYKSLQGPL | Negative |
| Q942A7 | VLLASFAAVILSLAAPLLAG | Negative |
| Q942A7 | LAGDPDMLQDICVADYKSLQ | Negative |
| Q942A7 | LLASFAAVILSLAAPLLAGD | Negative |
| Q942A7 | GDPDMLQDICVADYKSLQGP | Negative |
| Q942A7 | LAAPLLAGDPDMLQDICVAD | Negative |
| Q949Y3 | TSSFIRSEWPAVDIPLDHHV | Negative |
| Q949Y3 | LLLYRGESGITSSFIRSEWP | Negative |
| Q949Y3 | MNHLVIISVFLSSVLLLYRG | Negative |
| Q949Y3 | HLVIISVFLSSVLLLYRGES | Negative |
| Q949Y3 | NHLVIISVFLSSVLLLYRGE | Negative |
| Q949Y3 | RGESGITSSFIRSEWPAVDI | Negative |
| Q949Y3 | YRGESGITSSFIRSEWPAVD | Negative |
| Q949Y3 | SSFIRSEWPAVDIPLDHHVF | Negative |
| Q949Y3 | VIISVFLSSVLLLYRGESGI | Negative |
| Q949Y3 | IISVFLSSVLLLYRGESGIT | Negative |
| Q949Y3 | VLLLYRGESGITSSFIRSEW | Negative |
| Q949Y3 | FLSSVLLLYRGESGITSSFI | Negative |

|        |                      |          |
|--------|----------------------|----------|
| Q949Y3 | ESGITSSFIRSEWPAVDIPL | Negative |
| Q949Y3 | RSEWPAVDIPLDHHVFKVPK | Negative |
| Q949Y3 | VFLSSVLLLYRGESGITSSF | Negative |
| Q949Y3 | SGITSSFIRSEWPAVDIPLD | Negative |
| Q949Y3 | GESGITSSFIRSEWPAVDIP | Negative |
| Q949Y3 | SSVLLLYRGESGITSSFIRS | Negative |
| Q949Y3 | SVFLSSVLLLYRGESGITSS | Negative |
| Q949Y3 | LYRGESGITSSFIRSEWPAV | Negative |
| Q949Y3 | GITSSFIRSEWPAVDIPLDH | Negative |
| Q949Y3 | SVLLLYRGESGITSSFIRSE | Negative |
| Q949Y3 | ITSSFIRSEWPAVDIPLDHH | Negative |
| Q949Y3 | LSSVLLLYRGESGITSSFIR | Negative |
| Q949Y3 | IRSEWPAVDIPLDHHVFKVP | Negative |
| Q949Y3 | SFIRSEWPAVDIPLDHHVFK | Negative |
| Q949Y3 | FIRSEWPAVDIPLDHHVFKV | Negative |
| Q949Y3 | ISVFLSSVLLLYRGESGITS | Negative |
| Q949Y3 | LVIISVFLSSVLLLYRGESG | Negative |
| Q94EG3 | LAISIDRYCFAADEDMLQDV | Negative |
| Q94EG3 | FQSMEMAILFLLAISIDRYC | Negative |
| Q94EG3 | LFLLAISIDRYCFAADEDML | Negative |
| Q94EG3 | AAFGINSKIFQSMEMAILFL | Negative |
| Q94EG3 | CFAADEDMLQDVCVADLHSK | Negative |
| Q94EG3 | SKIFQSMEMAILFLLAISID | Negative |
| Q94EG3 | SIDRYCFAADEDMLQDVCVA | Negative |
| Q94EG3 | MEMAILFLLAISIDRYCFAA | Negative |
| Q94EG3 | SMEMAILFLLAISIDRYCFA | Negative |
| Q94EG3 | YCFAADEDMLQDVCVADLHS | Negative |
| Q94EG3 | KIFQSMEMAILFLLAISIDR | Negative |
| Q94EG3 | DRYCFAADEDMLQDVCVADL | Negative |
| Q94EG3 | IDRYCFAADEDMLQDVCVAD | Negative |
| Q94EG3 | AISIDRYCFAADEDMLQDVC | Negative |
| Q94EG3 | QSMEMAILFLLAISIDRYCF | Negative |
| Q94EG3 | MAAFGINSKIFQSMEMAILF | Negative |
| Q94EG3 | INSKIFQSMEMAILFLLAIS | Negative |
| Q94EG3 | RYCFAADEDMLQDVCVADLH | Negative |
| Q94EG3 | FGINSKIFQSMEMAILFLLA | Negative |
| Q94EG3 | MAILFLLAISIDRYCFAADE | Negative |
| Q94EG3 | NSKIFQSMEMAILFLLAISI | Negative |
| Q94EG3 | ISIDRYCFAADEDMLQDVCV | Negative |
| Q94EG3 | IFQSMEMAILFLLAISIDRY | Negative |
| Q94EG3 | AFGINSKIFQSMEMAILFLL | Negative |
| Q94EG3 | GINSKIFQSMEMAILFLLAI | Negative |
| Q94EG3 | EMAILFLLAISIDRYCFAAD | Negative |
| Q94EG3 | LLAISIDRYCFAADEDMLQD | Negative |
| Q94EG3 | FLLAISIDRYCFAADEDMLQ | Negative |
| Q94EG3 | AILFLLAISIDRYCFAADED | Negative |

|        |                        |          |
|--------|------------------------|----------|
| Q95121 | GALLGFGRQCQNAGQEAGSLT  | Negative |
| Q95121 | AGSLTPESTGAPVEEEDPFF   | Negative |
| Q95121 | LTPESTGAPVEEEDPFFKVP   | Negative |
| Q95121 | FGRCQNAGQEAGSLTPESTG   | Negative |
| Q95121 | EAGSLTPESTGAPVEEEDPF   | Negative |
| Q95121 | LVLLLTGTGALLGFGRQCQNAG | Negative |
| Q95121 | GSLTPESTGAPVEEEDPFFK   | Negative |
| Q95121 | QNAGQEAGSLTPESTGAPVE   | Negative |
| Q95121 | LWTGALLGFGRQCQNAGQEAG  | Negative |
| Q95121 | ALLGFGRQCQNAGQEAGSLTP  | Negative |
| Q95121 | ALVLLLTGTGALLGFGRQCNA  | Negative |
| Q95121 | RCQNAGQEAGSLTPESTGAP   | Negative |
| Q95121 | TGALLGFGRQCQNAGQEAGSL  | Negative |
| Q95121 | LLWTGALLGFGRQCQNAGQEA  | Negative |
| Q95121 | CQNAGQEAGSLTPESTGAPV   | Negative |
| Q95121 | TPESTGAPVEEEDPFFKVPV   | Negative |
| Q95121 | QEAGSLTPESTGAPVEEEDP   | Negative |
| Q95121 | WTGALLGFGRQCQNAGQEAGS  | Negative |
| Q95121 | SLTPESTGAPVEEEDPFFKV   | Negative |
| Q95121 | NAGQEAGSLTPESTGAPVEE   | Negative |
| Q95121 | GFGRCQNAGQEAGSLTPEST   | Negative |
| Q95121 | QALVLLLTGTGALLGFGRQCQN | Negative |
| Q95121 | VLLLTGTGALLGFGRQCQNAGQ | Negative |
| Q95121 | MQALVLLLTGTGALLGFGRQCQ | Negative |
| Q95121 | GQEAGSLTPESTGAPVEEED   | Negative |
| Q95121 | LLGFGRQCQNAGQEAGSLTPE  | Negative |
| Q95121 | AGQEAGSLTPESTGAPVEEE   | Negative |
| Q95121 | LGFGRCQNAGQEAGSLTPES   | Negative |
| Q95121 | GRCQNAGQEAGSLTPESTGA   | Negative |
| Q95JC9 | SAEKFLRPPPGGGPPRPPPP   | Negative |
| Q95JC9 | ALLALSSARSPFFDLEDANS   | Negative |
| Q95JC9 | LEDANSNSAEKFLRPPPGGG   | Negative |
| Q95JC9 | SARSPFFDLEDANSNSAEKF   | Negative |
| Q95JC9 | ANSNSAEKFLRPPPGGGPPR   | Negative |
| Q95JC9 | EDANSNSAEKFLRPPPGGGP   | Negative |
| Q95JC9 | ILLSVALLALSSARSPFFDL   | Negative |
| Q95JC9 | NSNSAEKFLRPPPGGGPPRP   | Negative |
| Q95JC9 | FDLEDANSNSAEKFLRPPPG   | Negative |
| Q95JC9 | LSSARSPFFDLEDANSNSAE   | Negative |
| Q95JC9 | SVALLALSSARSPFFDLEDA   | Negative |
| Q95JC9 | LLSVALLALSSARSPFFDLE   | Negative |
| Q95JC9 | NSAEKFLRPPPGGGPPRPPPP  | Negative |
| Q95JC9 | PFFDLEDANSNSAEKFLRPP   | Negative |
| Q95JC9 | ARSPFFDLEDANSNSAEKFL   | Negative |
| Q95JC9 | LLALSSARSPFFDLEDANSN   | Negative |
| Q95JC9 | LALSSARSPFFDLEDANSNS   | Negative |

|        |                      |          |
|--------|----------------------|----------|
| Q95JC9 | VALLALSSARSPFFDLEDAN | Negative |
| Q95JC9 | SNSAEKFLRPPPGGGPPRPP | Negative |
| Q95JC9 | RSPFFDLEDANSNSAEKFLR | Negative |
| Q95JC9 | LSVALLALSSARSPFFDLED | Negative |
| Q95JC9 | DLEDANSNSAEKFLRPPPGG | Negative |
| Q95JC9 | SPFFDLEDANSNSAEKFLRP | Negative |
| Q95JC9 | MLPILLSVALLALSSARSPF | Negative |
| Q95JC9 | DANSNSAEKFLRPPPGGGPP | Negative |
| Q95JC9 | SSARSPFFDLEDANSNSAEK | Negative |
| Q95JC9 | PILLSVALLALSSARSPFFD | Negative |
| Q95JC9 | FFDLEDANSNSAEKFLRPPP | Negative |
| Q95JC9 | ALSSARSPFFDLEDANSNSA | Negative |
| Q95M17 | LIFLTGLAFLRNAQLGSAYQ | Negative |
| Q95M17 | NAQLGSAYQLVCYFSNWAQY | Negative |
| Q95M17 | LNAQLGSAYQLVCYFSNWAQ | Negative |
| Q95M17 | FLLNAQLGSAYQLVCYFSNW | Negative |
| Q95M17 | VCYFSNWAQYRPGLGSKPD  | Negative |
| Q95M17 | LGSAYQLVCYFSNWAQYRPG | Negative |
| Q95M17 | SAYQLVCYFSNWAQYRPLG  | Negative |
| Q95M17 | NWAQYRPGLGSKPDNIDPC  | Negative |
| Q95M17 | MAKLIFLTGLAFLRNAQLGS | Negative |
| Q95M17 | AFLRNAQLGSAYQLVCYFSN | Negative |
| Q95M17 | AQLGSAYQLVCYFSNWAQYR | Negative |
| Q95M17 | YQLVCYFSNWAQYRPGLSF  | Negative |
| Q95M17 | GLAFLRNAQLGSAYQLVCYF | Negative |
| Q95M17 | QLGSAYQLVCYFSNWAQYRP | Negative |
| Q95M17 | FSNWAQYRPGLGSKPDNID  | Negative |
| Q95M17 | IFLTGLAFLRNAQLGSAYQL | Negative |
| Q95M17 | LVCYFSNWAQYRPGLGSKP  | Negative |
| Q95M17 | SNWAQYRPGLGSKPDNIDP  | Negative |
| Q95M17 | AYQLVCYFSNWAQYRPLGS  | Negative |
| Q95M17 | AKLIFLTGLAFLRNAQLGSA | Negative |
| Q95M17 | LLNAQLGSAYQLVCYFSNWA | Negative |
| Q95M17 | CYFSNWAQYRPGLGSKPDN  | Negative |
| Q95M17 | KLIFLTGLAFLRNAQLGSAY | Negative |
| Q95M17 | GSAYQLVCYFSNWAQYRPL  | Negative |
| Q95M17 | LAFLRNAQLGSAYQLVCYFS | Negative |
| Q95M17 | TGLAFLRNAQLGSAYQLVCY | Negative |
| Q95M17 | FLTGLAFLRNAQLGSAYQLV | Negative |
| Q95M17 | QLVCYFSNWAQYRPGLGSK  | Negative |
| Q95M17 | YFSNWAQYRPGLGSKPDNI  | Negative |
| Q95NJ8 | CQSVRDCQQYCLTPDRCSYG | Negative |
| Q95NJ8 | TIVPVNEAQTQCQSVRDCQQ | Negative |
| Q95NJ8 | ILISVLIATIVPVNEAQTQC | Negative |
| Q95NJ8 | SVRDCQQYCLTPDRCSYGTC | Negative |
| Q95NJ8 | ISVLIATIVPVNEAQTQCQS | Negative |



|        |                      |          |
|--------|----------------------|----------|
| Q95NJ8 | FIIVLILISVLIATIVPVNE | Negative |
| Q95NJ8 | VPVNEAQTQCQSVRDCQQYC | Negative |
| Q95NJ8 | LIATIVPVNEAQTQCQSVRD | Negative |
| Q95NJ8 | IATIVPVNEAQTQCQSVRDC | Negative |
| Q95NJ8 | QSVRDCQQYCLTPDRCSYGT | Negative |
| Q95NJ8 | IIVLILISVLIATIVPVNEA | Negative |
| Q95NJ8 | PVNEAQTQCQSVRDCQQYCL | Negative |
| Q95NJ8 | IVLILISVLIATIVPVNEAQ | Negative |
| Q95NJ8 | VRDCQQYCLTPDRCSYGTCY | Negative |
| Q95NJ8 | LILISVLIATIVPVNEAQTQ | Negative |
| Q95NJ8 | AQTQCQSVRDCQQYCLTPDR | Negative |
| Q95NJ8 | ATIVPVNEAQTQCQSVRDCQ | Negative |
| Q95NJ8 | SVLIATIVPVNEAQTQCQSV | Negative |
| Q95NJ8 | NEAQTQCQSVRDCQQYCLTP | Negative |
| Q95NJ8 | EAQTQCQSVRDCQQYCLTPD | Negative |
| Q95NJ8 | QCQSVRDCQQYCLTPDRCSY | Negative |
| Q95NJ8 | VLILISVLIATIVPVNEAQT | Negative |
| Q95NJ8 | VNEAQTQCQSVRDCQQYCLT | Negative |
| Q95NJ8 | QTQCQSVRDCQQYCLTPDRC | Negative |
| Q95NJ8 | TQCQSVRDCQQYCLTPDRCS | Negative |
| Q95NJ8 | IVPVNEAQTQCQSVRDCQQY | Negative |
| Q95NJ8 | VLIATIVPVNEAQTQCQSVR | Negative |
| Q95NJ8 | KFIIVLILISVLIATIVPVN | Negative |
| Q95NJ8 | MKFIIVLILISVLIATIVPV | Negative |
| Q95NK7 | WTVNGTPFAIKCATDADCSR | Negative |
| Q95NK7 | AVCSMAIWTVNGTPFAIKCA | Negative |
| Q95NK7 | NGTPFAIKCATDADCSRKCP | Negative |
| Q95NK7 | ILLILAVCSMAIWTVNGTPF | Negative |
| Q95NK7 | IFFAILLILAVCSMAIWTVN | Negative |
| Q95NK7 | AIWTVNGTPFAIKCATDADC | Negative |
| Q95NK7 | CATDADCSRKCPGNPPCRNG | Negative |
| Q95NK7 | KIFFAILLILAVCSMAIWTV | Negative |
| Q95NK7 | FFAILLILAVCSMAIWTVNG | Negative |
| Q95NK7 | AILLILAVCSMAIWTVNGTP | Negative |
| Q95NK7 | SMAIWTVNGTPFAIKCATDA | Negative |
| Q95NK7 | LLILAVCSMAIWTVNGTPFA | Negative |
| Q95NK7 | MAIWTVNGTPFAIKCATDAD | Negative |
| Q95NK7 | VNGTPFAIKCATDADCSRKC | Negative |
| Q95NK7 | VCSMAIWTVNGTPFAIKCAT | Negative |
| Q95NK7 | ILAVCSMAIWTVNGTPFAIK | Negative |
| Q95NK7 | CSMAIWTVNGTPFAIKCATD | Negative |
| Q95NK7 | PFAIKCATDADCSRKCPGNP | Negative |
| Q95NK7 | AIKCATDADCSRKCPGNPPC | Negative |
| Q95NK7 | TVNGTPFAIKCATDADCSRK | Negative |
| Q95NK7 | LAVCSMAIWTVNGTPFAIKC | Negative |
| Q95NK7 | KCATDADCSRKCPGNPPCRN | Negative |

|        |                        |          |
|--------|------------------------|----------|
| Q95NK7 | FAIKCATDADCSRKCPGNPP   | Negative |
| Q95NK7 | FAILLILAVCSMAIWTVNGT   | Negative |
| Q95NK7 | IWTVNGTPFAIKCATDADCS   | Negative |
| Q95NK7 | IKCATDADCSRKCPGNPPCR   | Negative |
| Q95NK7 | GTPFAIKCATDADCSRKCPG   | Negative |
| Q95NK7 | MKIFFAILLILAVCSMAIWT   | Negative |
| Q95NK7 | TPFAIKCATDADCSRKCPGN   | Negative |
| Q95P08 | ADTKDKLEKILELIGHVNRP   | Negative |
| Q95P08 | TKDKLEKILELIGHVNRPLT   | Negative |
| Q95P08 | PVPADTKDKLEKILELIGHV   | Negative |
| Q95P08 | GTVIRADQCPPVPADTKDKL   | Negative |
| Q95P08 | LATLFLVLTGTVIRADQCPPVP | Negative |
| Q95P08 | TVIRADQCPPVPADTKDKLE   | Negative |
| Q95P08 | VPADTKDKLEKILELIGHVN   | Negative |
| Q95P08 | FVLGTVIRADQCPPVPADTK   | Negative |
| Q95P08 | VIRADQCPPVPADTKDKLEK   | Negative |
| Q95P08 | DQCPPVPADTKDKLEKILEL   | Negative |
| Q95P08 | DKLEKILELIGHVNRPLTPE   | Negative |
| Q95P08 | VLGTVIRADQCPPVPADTKD   | Negative |
| Q95P08 | IRADQCPPVPADTKDKLEKI   | Negative |
| Q95P08 | MWSLALATLFLVLTGTVIRADQ | Negative |
| Q95P08 | CPPVPADTKDKLEKILELIG   | Negative |
| Q95P08 | ADQCPPVPADTKDKLEKILE   | Negative |
| Q95P08 | SLALATLFLVLTGTVIRADQCP | Negative |
| Q95P08 | PPVPADTKDKLEKILELIGH   | Negative |
| Q95P08 | KDKLEKILELIGHVNRPLTP   | Negative |
| Q95P08 | RADQCPPVPADTKDKLEKIL   | Negative |
| Q95P08 | DTKDKLEKILELIGHVNRPL   | Negative |
| Q95P08 | LGTVIRADQCPPVPADTKDK   | Negative |
| Q95P08 | LFVLGTVIRADQCPPVPADT   | Negative |
| Q95P08 | QCPPVPADTKDKLEKILELI   | Negative |
| Q95P08 | WSLALATLFLVLTGTVIRADQC | Negative |
| Q95P08 | PADTKDKLEKILELIGHVNR   | Negative |
| Q95P08 | ATLFLVLTGTVIRADQCPPVA  | Negative |
| Q95P08 | TLFLVLTGTVIRADQCPPVPAD | Negative |
| Q95P08 | ALATLFLVLTGTVIRADQCPPV | Negative |
| Q95P90 | LSPWNEGDTYYGCQRQTDEF   | Negative |
| Q95P90 | MQVIFIAFIAVIACSMVYGD   | Negative |
| Q95P90 | VIACSMVYGDSLSPWNEGDT   | Negative |
| Q95P90 | NEGDTYYGCQRQTDEFCKNI   | Negative |
| Q95P90 | FIAVIACSMVYGDSLSPWNE   | Negative |
| Q95P90 | QVIFIAFIAVIACSMVYGDS   | Negative |
| Q95P90 | SLSPWNEGDTYYGCQRQTDE   | Negative |
| Q95P90 | SMVYGDSLSPWNEGDTYYGC   | Negative |
| Q95P90 | KMQVIFIAFIAVIACSMVYGG  | Negative |
| Q95P90 | IACSMVYGDSLSPWNEGDTY   | Negative |

|        |                      |          |
|--------|----------------------|----------|
| Q95P90 | IFIAFIAVIACSMVYGDSLS | Negative |
| Q95P90 | ACSMVYGDSLSPWNEGDTYY | Negative |
| Q95P90 | SPWNEGDTYYGCQRQTDEFC | Negative |
| Q95P90 | IAFIAVIACSMVYGDSLSPW | Negative |
| Q95P90 | IAVIACSMVYGDSLSPWNEG | Negative |
| Q95P90 | AFIAVIACSMVYGDSLSPWN | Negative |
| Q95P90 | MVYGDSLSPWNEGDTYYGCQ | Negative |
| Q95P90 | PWNEGDTYYGCQRQTDEFCN | Negative |
| Q95P90 | MVKMQVIFIAFIAVIACSMV | Negative |
| Q95P90 | EGDTYYGCQRQTDEFCNKIC | Negative |
| Q95P90 | VYGDSLSPWNEGDTYYGCQR | Negative |
| Q95P90 | VKMQVIFIAFIAVIACSMVY | Negative |
| Q95P90 | WNEGDTYYGCQRQTDEFCNK | Negative |
| Q95P90 | CSMVYGDSLSPWNEGDTYYG | Negative |
| Q95P90 | DSLSPWNEGDTYYGCQRQTD | Negative |
| Q95P90 | AVIACSMVYGDSLSPWNEGD | Negative |
| Q95P90 | VIFIAFIAVIACSMVYGDSL | Negative |
| Q95P90 | YGDSLSPWNEGDTYYGCQRQ | Negative |
| Q95P90 | GDSLSPWNEGDTYYGCQRQT | Negative |
| Q95UE8 | MKSVFVCTLVLALAHHAFAG | Negative |
| Q95UE8 | ALAHHAFAGVCDSNVDYNST | Negative |
| Q95UE8 | TLVLALAHHAFAGVCDSNVD | Negative |
| Q95UE8 | VCTLVLALAHHAFAGVCDSN | Negative |
| Q95UE8 | LALAHHAFAGVCDSNVDYNS | Negative |
| Q95UE8 | FAGVCDSNVDYNSTLITPCL | Negative |
| Q95UE8 | VDYNSTLITPCLGNDIIVLW | Negative |
| Q95UE8 | NSTLITPCLGNDIIVLWPNY | Negative |
| Q95UE8 | VFVCTLVLALAHHAFAGVCD | Negative |
| Q95UE8 | HHAFAGVCDSNVDYNSTLIT | Negative |
| Q95UE8 | VCDSNVDYNSTLITPCLGND | Negative |
| Q95UE8 | HAFAGVCDSNVDYNSTLITP | Negative |
| Q95UE8 | STLITPCLGNDIIVLWPNYL | Negative |
| Q95UE8 | AHHAFAGVCDSNVDYNSTLI | Negative |
| Q95UE8 | LAHHAFAGVCDSNVDYNSTL | Negative |
| Q95UE8 | VLALAHHAFAGVCDSNVDYN | Negative |
| Q95UE8 | CDSNVDYNSTLITPCLGNDI | Negative |
| Q95UE8 | LVLALAHHAFAGVCDSNVDY | Negative |
| Q95UE8 | KSVFVCTLVLALAHHAFAGV | Negative |
| Q95UE8 | NVDYNSTLITPCLGNDIIVL | Negative |
| Q95UE8 | CTLVLALAHHAFAGVCDSNV | Negative |
| Q95UE8 | DSNVDYNSTLITPCLGNDII | Negative |
| Q95UE8 | AGVCDSNVDYNSTLITPCLG | Negative |
| Q95UE8 | YNSTLITPCLGNDIIVLWPN | Negative |
| Q95UE8 | AFAGVCDSNVDYNSTLITPC | Negative |
| Q95UE8 | DYNSTLITPCLGNDIIVLWP | Negative |
| Q95UE8 | SNVDYNSTLITPCLGNDIIV | Negative |

|        |                      |          |
|--------|----------------------|----------|
| Q95UE8 | GVCDSDYNSTLITPCLGN   | Negative |
| Q95UE8 | SVFVCTLVLALAHAFAGVC  | Negative |
| Q95VF0 | VVCLSLYQAVEPSQDVVKDM | Negative |
| Q95VF0 | AVVCLSLYQAVEPSQDVVKD | Negative |
| Q95VF0 | SLYQAVEPSQDVVKDMSLNF | Negative |
| Q95VF0 | VCLSLYQAVEPSQDVVKDMS | Negative |
| Q95VF0 | NHKELVLFAVVCLSLYQAVE | Negative |
| Q95VF0 | MNHKELVLFAVVCLSLYQAV | Negative |
| Q95VF0 | VEPSQDVVKDMSLNFVKGLD | Negative |
| Q95VF0 | DMSLNFVKGLDACKKELNLP | Negative |
| Q95VF0 | LYQAVEPSQDVVKDMSLNF  | Negative |
| Q95VF0 | LSLYQAVEPSQDVVKDMSLN | Negative |
| Q95VF0 | QDVVKDMSLNFVKGLDACKK | Negative |
| Q95VF0 | HKELVLFAVVCLSLYQAVEP | Negative |
| Q95VF0 | KELVLFAVVCLSLYQAVEPS | Negative |
| Q95VF0 | KDMSLNFVKGLDACKKELNL | Negative |
| Q95VF0 | AVEPSQDVVKDMSLNFVKGL | Negative |
| Q95VF0 | LVLFAVVCLSLYQAVEPSQD | Negative |
| Q95VF0 | MMNHKELVLFAVVCLSLYQA | Negative |
| Q95VF0 | VVKDMSLNFVKGLDACKKEL | Negative |
| Q95VF0 | VKDMSLNFVKGLDACKKELN | Negative |
| Q95VF0 | VLFAVVCLSLYQAVEPSQDV | Negative |
| Q95VF0 | EPSQDVVKDMSLNFVKGLDA | Negative |
| Q95VF0 | FAVVCLSLYQAVEPSQDVVK | Negative |
| Q95VF0 | ELVLFAVVCLSLYQAVEPSQ | Negative |
| Q95VF0 | CLSLYQAVEPSQDVVKDMSL | Negative |
| Q95VF0 | YQAVEPSQDVVKDMSLNFVK | Negative |
| Q95VF0 | SQDVVKDMSLNFVKGLDACK | Negative |
| Q95VF0 | DVVKDMSLNFVKGLDACKKE | Negative |
| Q95VF0 | PSQDVVKDMSLNFVKGLDAC | Negative |
| Q95VF0 | QAVEPSQDVVKDMSLNFVK  | Negative |
| Q95VP2 | CVVLVAGSHLVAGTAEVMSH | Negative |
| Q95VP2 | VMSHVTAHFGKALEQCREES | Negative |
| Q95VP2 | VCVVLVAGSHLVAGTAEVMS | Negative |
| Q95VP2 | SYWAVCVVLVAGSHLVAGTA | Negative |
| Q95VP2 | AEVMSHVTAHFGKALEQCRE | Negative |
| Q95VP2 | EVMSHVTAHFGKALEQCREE | Negative |
| Q95VP2 | AGSHLVAGTAEVMSHVTAHF | Negative |
| Q95VP2 | AHFGKALEQCREESGLSTAV | Negative |
| Q95VP2 | VLVAGSHLVAGTAEVMSHVT | Negative |
| Q95VP2 | SHVTAHFGKALEQCREESGL | Negative |
| Q95VP2 | VAGSHLVAGTAEVMSHVTAH | Negative |
| Q95VP2 | VAGTAEVMSHVTAHFGKALE | Negative |
| Q95VP2 | TAHFGKALEQCREESGLSTA | Negative |
| Q95VP2 | LVAGTAEVMSHVTAHFGKAL | Negative |
| Q95VP2 | MSHVTAHFGKALEQCREESG | Negative |

|        |                      |          |
|--------|----------------------|----------|
| Q95VP2 | ASYWAVCVVLVAGSHLVAGT | Negative |
| Q95VP2 | HVTAHFGKALEQCREESGLS | Negative |
| Q95VP2 | AGTAEVMSHVTAHFGKALEQ | Negative |
| Q95VP2 | TAEVMSHVTAHFGKALEQCR | Negative |
| Q95VP2 | MASYWAVCVVLVAGSHLVAG | Negative |
| Q95VP2 | HLVAGTAEVMSHVTAHFGKA | Negative |
| Q95VP2 | GSHLVAGTAEVMSHVTAHFG | Negative |
| Q95VP2 | GTAEVMSHVTAHFGKALEQC | Negative |
| Q95VP2 | LVAGSHLVAGTAEVMSHVTA | Negative |
| Q95VP2 | VTAHFGKALEQCREESGLST | Negative |
| Q95VP2 | YWAVCVVLVAGSHLVAGTAE | Negative |
| Q95VP2 | WAVCVVLVAGSHLVAGTAEV | Negative |
| Q95VP2 | SHLVAGTAEVMSHVTAHFGK | Negative |
| Q95VP2 | VVLVAGSHLVAGTAEVMSHV | Negative |
| Q95VP3 | CLTGVWQVESSADVMKKLTT | Negative |
| Q95VP3 | TGVWQVESSADVMKKLTTGF | Negative |
| Q95VP3 | VMKKLTTGFATALEKCRDEL | Negative |
| Q95VP3 | MLVLTCLTGVWQVESSADV  | Negative |
| Q95VP3 | DVMKKLTTGFATALEKCRDE | Negative |
| Q95VP3 | MKKLTTGFATALEKCRDELN | Negative |
| Q95VP3 | SSADVMKKLTTGFATALEKC | Negative |
| Q95VP3 | GVWQVESSADVMKKLTTGFA | Negative |
| Q95VP3 | SADVMKKLTTGFATALEKCR | Negative |
| Q95VP3 | TLCLTGVWQVESSADVMKKL | Negative |
| Q95VP3 | WRMLVLTCLTGVWQVESSA  | Negative |
| Q95VP3 | ESSADVMKKLTTGFATALEK | Negative |
| Q95VP3 | VSKWRMLVLTCLTGVWQVE  | Negative |
| Q95VP3 | LTGVWQVESSADVMKKLTTG | Negative |
| Q95VP3 | MATVSKWRMLVLTCLTGVW  | Negative |
| Q95VP3 | ADVMKKLTTGFATALEKCRD | Negative |
| Q95VP3 | ATVSKWRMLVLTCLTGVWQ  | Negative |
| Q95VP3 | QVESSADVMKKLTTGFATAL | Negative |
| Q95VP3 | VLTCLTGVWQVESSADVMK  | Negative |
| Q95VP3 | VESSADVMKKLTTGFATALE | Negative |
| Q95VP3 | SKWRMLVLTCLTGVWQVES  | Negative |
| Q95VP3 | WQVESSADVMKKLTTGFATA | Negative |
| Q95VP3 | TVSKWRMLVLTCLTGVWQV  | Negative |
| Q95VP3 | KWRMLVLTCLTGVWQVESS  | Negative |
| Q95VP3 | RMLVLTCLTGVWQVESSAD  | Negative |
| Q95VP3 | VWQVESSADVMKKLTTGFAT | Negative |
| Q95VP3 | LTLCLTGVWQVESSADVMKK | Negative |
| Q95VP3 | LCLTGVWQVESSADVMKKLT | Negative |
| Q95VP3 | KKLTTGFATALEKCRDELNL | Negative |
| Q96318 | KLSNLLVATFGVLLVLNGCL | Negative |
| Q96318 | GCLARQSLGVPPQLQNECNL | Negative |
| Q96318 | VLNGCLARQSLGVPPQLQNE | Negative |

|        |                      |          |
|--------|----------------------|----------|
| Q96318 | QSLGVPPQLQNECNLDNLDV | Negative |
| Q96318 | ARQSLGVPPQLQNECNLDNL | Negative |
| Q96318 | LLVLNGCLARQSLGVPPQLQ | Negative |
| Q96318 | LVLNGCLARQSLGVPPQLQN | Negative |
| Q96318 | CLARQSLGVPPQLQNECNLD | Negative |
| Q96318 | VLLVLNGCLARQSLGVPPQL | Negative |
| Q96318 | GVLLVLNGCLARQSLGVPPQ | Negative |
| Q96318 | SNLLVATFGVLLVLNGCLAR | Negative |
| Q96318 | RQSLGVPPQLQNECNLDNLD | Negative |
| Q96318 | TFGVLLVLNGCLARQSLGVP | Negative |
| Q96318 | VPPQLQNECNLDNLDVLQAT | Negative |
| Q96318 | MVKLSNLLVATFGVLLVLNG | Negative |
| Q96318 | PPQLQNECNLDNLDVLQATE | Negative |
| Q96318 | FGVLLVLNGCLARQSLGVPP | Negative |
| Q96318 | LLVATFGVLLVLNGCLARQS | Negative |
| Q96318 | GVPPQLQNECNLDNLDVLQA | Negative |
| Q96318 | ATFGVLLVLNGCLARQSLGV | Negative |
| Q96318 | LGVPPQLQNECNLDNLDVLQ | Negative |
| Q96318 | SLGVPPQLQNECNLDNLDVL | Negative |
| Q96318 | VKLSNLLVATFGVLLVLNGC | Negative |
| Q96318 | NGCLARQSLGVPPQLQNECN | Negative |
| Q96318 | NLLVATFGVLLVLNGCLARQ | Negative |
| Q96318 | LARQSLGVPPQLQNECNLDN | Negative |
| Q96318 | LVATFGVLLVLNGCLARQSL | Negative |
| Q96318 | LSNLLVATFGVLLVLNGCLA | Negative |
| Q96318 | LNGCLARQSLGVPPQLQNEC | Negative |
| Q965E2 | CGKGEVESLEVEGCSGDYCV | Negative |
| Q965E2 | AGKVKFQDCGKGEVESLEVE | Negative |
| Q965E2 | GKVKFQDCGKGEVESLEVEG | Negative |
| Q965E2 | GEVESLEVEGCSGDYCVIHK | Negative |
| Q965E2 | QDCGKGEVESLEVEGCSGDY | Negative |
| Q965E2 | TLVVLAITLAVVSAGKVKFQ | Negative |
| Q965E2 | VLAITLAVVSAGKVKFQDCG | Negative |
| Q965E2 | KVKFQDCGKGEVESLEVEGC | Negative |
| Q965E2 | TLAVVSAGKVKFQDCGKGEV | Negative |
| Q965E2 | LAITLAVVSAGKVKFQDCGK | Negative |
| Q965E2 | ITLAVVSAGKVKFQDCGKGE | Negative |
| Q965E2 | MKTLVVLAITLAVVSAGKVK | Negative |
| Q965E2 | VVLAITLAVVSAGKVKFQDC | Negative |
| Q965E2 | VKFQDCGKGEVESLEVEGCS | Negative |
| Q965E2 | VVSAGKVKFQDCGKGEVESL | Negative |
| Q965E2 | AVVSAGKVKFQDCGKGEVES | Negative |
| Q965E2 | KGEVESLEVEGCSGDYCVIH | Negative |
| Q965E2 | SAGKVKFQDCGKGEVESLEV | Negative |
| Q965E2 | DCGKGEVESLEVEGCSGDYC | Negative |
| Q965E2 | LAVVSAGKVKFQDCGKGEVE | Negative |

|        |                      |          |
|--------|----------------------|----------|
| Q965E2 | VESLEVEGCSGDYCVIHKGK | Negative |
| Q965E2 | FQDCGKGEVESLEVEGCSGD | Negative |
| Q965E2 | MMKTLVVLAITLAVVSAGKV | Negative |
| Q965E2 | VSAGKVKFQDCGKGEVESLE | Negative |
| Q965E2 | LVVLAITLAVVSAGKVKFQD | Negative |
| Q965E2 | GKGEVESLEVEGCSGDYCVI | Negative |
| Q965E2 | EVESLEVEGCSGDYCVIHKG | Negative |
| Q965E2 | KFQDCGKGEVESLEVEGCSG | Negative |
| Q965E2 | AITLAVVSAGKVKFQDCGKG | Negative |
| Q966V2 | GSCSESTNPFTNKPYATQNP | Negative |
| Q966V2 | SGAIALFALTGSCSESTNPF | Negative |
| Q966V2 | AINVIFISGAIALFALTGSC | Negative |
| Q966V2 | TNKPYATQNPYSPPQTNQPT | Negative |
| Q966V2 | SESTNPFTNKPYATQNPYSP | Negative |
| Q966V2 | AIALFALTGSCSESTNPFTN | Negative |
| Q966V2 | ESTNPFTNKPYATQNPYSPP | Negative |
| Q966V2 | LFALTGSCSESTNPFTNKPY | Negative |
| Q966V2 | INVIFISGAIALFALTGSCS | Negative |
| Q966V2 | NVIFISGAIALFALTGSCSE | Negative |
| Q966V2 | SCSESTNPFTNKPYATQNPY | Negative |
| Q966V2 | NPFTNKPYATQNPYSPPQTN | Negative |
| Q966V2 | AAINVIFISGAIALFALTGS | Negative |
| Q966V2 | ALFALTGSCSESTNPFTNKP | Negative |
| Q966V2 | ISGAIALFALTGSCSESTNP | Negative |
| Q966V2 | IFISGAIALFALTGSCSEST | Negative |
| Q966V2 | ALTGSCSESTNPFTNKPYAT | Negative |
| Q966V2 | GAIALFALTGSCSESTNPFT | Negative |
| Q966V2 | VIFISGAIALFALTGSCSES | Negative |
| Q966V2 | MAAINVIFISGAIALFALTG | Negative |
| Q966V2 | FALTGSCSESTNPFTNKPYA | Negative |
| Q966V2 | TNPFTNKPYATQNPYSPPQT | Negative |
| Q966V2 | TGSCSESTNPFTNKPYATQN | Negative |
| Q966V2 | PFTNKPYATQNPYSPPQTNQ | Negative |
| Q966V2 | IALFALTGSCSESTNPFTNK | Negative |
| Q966V2 | STNPFTNKPYATQNPYSPPQ | Negative |
| Q966V2 | FTNKPYATQNPYSPPQTNQP | Negative |
| Q966V2 | LTGSCSESTNPFTNKPYATQ | Negative |
| Q966V2 | CSESTNPFTNKPYATQNPYS | Negative |
| Q968Z6 | MKLLIYLFILTFYKTIVLTQ | Negative |
| Q968Z6 | LIYLFILTFYKTIVLTQTPS | Negative |
| Q968Z6 | PSTHLDVDITIYDQLPLYNN | Negative |
| Q968Z6 | ITIYDQLPLYNNNFEPETGS | Negative |
| Q968Z6 | YKTIVLTQTPSTHLDVDITI | Negative |
| Q968Z6 | ILTFYKTIVLTQTPSTHLDV | Negative |
| Q968Z6 | VDITIYDQLPLYNNNFEPET | Negative |
| Q968Z6 | THLDVDITIYDQLPLYNNNF | Negative |

|        |                      |          |
|--------|----------------------|----------|
| Q968Z6 | DVDITIYDQLPLYNNNFEPE | Negative |
| Q968Z6 | TFYKTIVLTQTPSTHLDVDI | Negative |
| Q968Z6 | TQTPSTHLDVDITIYDQLPL | Negative |
| Q968Z6 | QTPSTHLDVDITIYDQLPLY | Negative |
| Q968Z6 | FILTFYKTIVLTQTPSTHLD | Negative |
| Q968Z6 | YLFILTFYKTIVLTQTPSTH | Negative |
| Q968Z6 | STHLDVDITIYDQLPLYNNN | Negative |
| Q968Z6 | TPSTHLDVDITIYDQLPLYN | Negative |
| Q968Z6 | LFILTFYKTIVLTQTPSTHL | Negative |
| Q968Z6 | VLTQTPSTHLDVDITIYDQL | Negative |
| Q968Z6 | LLIYLFILTFYKTIVLTQTP | Negative |
| Q968Z6 | KLLIYLFILTFYKTIVLTQT | Negative |
| Q968Z6 | LDVDITIYDQLPLYNNNFEP | Negative |
| Q968Z6 | LTFYKTIVLTQTPSTHLDVD | Negative |
| Q968Z6 | LTQTPSTHLDVDITIYDQLP | Negative |
| Q968Z6 | DITIYDQLPLYNNNFEPETG | Negative |
| Q968Z6 | IVLTQTPSTHLDVDITIYDQ | Negative |
| Q968Z6 | FYKTIVLTQTPSTHLDVDIT | Negative |
| Q968Z6 | KTIVLTQTPSTHLDVDITIY | Negative |
| Q968Z6 | TIVLTQTPSTHLDVDITIYD | Negative |
| Q968Z6 | HLDVDITIYDQLPLYNNNFE | Negative |
| Q969H8 | AVALRPAEAVSEPTTVAFDV | Negative |
| Q969H8 | AEAVSEPTTVAFDVRPGGVV | Negative |
| Q969H8 | LWAALLLGAVALRPAEAVSE | Negative |
| Q969H8 | LRPAEAVSEPTTVAFDVRPG | Negative |
| Q969H8 | ASLWAALLLGAVALRPAEAV | Negative |
| Q969H8 | PSGGWNGVGASLWAALLLGA | Negative |
| Q969H8 | MAAPSGGWNGVGASLWAALL | Negative |
| Q969H8 | APSGGWNGVGASLWAALLLG | Negative |
| Q969H8 | EAVSEPTTVAFDVRPGGVVH | Negative |
| Q969H8 | LLGAVALRPAEAVSEPTTV  | Negative |
| Q969H8 | ALRPAEAVSEPTTVAFDVRP | Negative |
| Q969H8 | ALLGAVALRPAEAVSEPTT  | Negative |
| Q969H8 | LLGAVALRPAEAVSEPTTVA | Negative |
| Q969H8 | AAPSGGWNGVGASLWAALLL | Negative |
| Q969H8 | PAEAVSEPTTVAFDVRPGGV | Negative |
| Q969H8 | NGVGASLWAALLLGAVALRP | Negative |
| Q969H8 | VGASLWAALLLGAVALRPAE | Negative |
| Q969H8 | SLWAALLLGAVALRPAEAVS | Negative |
| Q969H8 | GASLWAALLLGAVALRPAEA | Negative |
| Q969H8 | LGAVALRPAEAVSEPTTVAF | Negative |
| Q969H8 | SGGWNGVGASLWAALLLGAV | Negative |
| Q969H8 | GGWNGVGASLWAALLLGAVA | Negative |
| Q969H8 | WAALLLGAVALRPAEAVSEP | Negative |
| Q969H8 | GAVALRPAEAVSEPTTVAFD | Negative |
| Q969H8 | GVGASLWAALLLGAVALRPA | Negative |



|        |                       |          |
|--------|-----------------------|----------|
| Q969H8 | RPAEAVSEPTTVAFDVRPGG  | Negative |
| Q969H8 | VALRPAEAVSEPTTVAFDVR  | Negative |
| Q969H8 | WNGVGASLWAALLLGAVALR  | Negative |
| Q969H8 | GWNGVGASLWAALLLGAVAL  | Negative |
| Q969J5 | TQSTHESLKPQRVQFQSRNF  | Negative |
| Q969J5 | GTQSTHESLKPQRVQFQSRN  | Negative |
| Q969J5 | LGFLISFFLTGVAGTQSTHE  | Negative |
| Q969J5 | KHCFLGFLISFFLTGVAGTQ  | Negative |
| Q969J5 | TGVAGTQSTHESLKPQRVQF  | Negative |
| Q969J5 | GVAGTQSTHESLKPQRVQFQ  | Negative |
| Q969J5 | FLISFFLTGVAGTQSTHESL  | Negative |
| Q969J5 | LKPQRVQFQSRNFHNILQWQ  | Negative |
| Q969J5 | HCFLGFLISFFLTGVAGTQS  | Negative |
| Q969J5 | SFFLTGVAGTQSTHESLKPQ  | Negative |
| Q969J5 | FLTGVAGTQSTHESLKPQRV  | Negative |
| Q969J5 | ESLKPQRVQFQSRNFHNILQ  | Negative |
| Q969J5 | CFLGFLISFFLTGVAGTQST  | Negative |
| Q969J5 | AGTQSTHESLKPQRVQFQSR  | Negative |
| Q969J5 | HESLKPQRVQFQSRNFHNIL  | Negative |
| Q969J5 | KPQRVQFQSRNFHNILQWQP  | Negative |
| Q969J5 | STHESLKPQRVQFQSRNFHN  | Negative |
| Q969J5 | MMPKHCF LGFLISFFLTGVA | Negative |
| Q969J5 | THESLKPQRVQFQSRNFHNI  | Negative |
| Q969J5 | SLKPQRVQFQSRNFHNILQW  | Negative |
| Q969J5 | LISFFLTGVAGTQSTHESLK  | Negative |
| Q969J5 | QSTHESLKPQRVQFQSRNFH  | Negative |
| Q969J5 | ISFFLTGVAGTQSTHESLKP  | Negative |
| Q969J5 | FFLTGVAGTQSTHESLKPQR  | Negative |
| Q969J5 | VAGTQSTHESLKPQRVQFQS  | Negative |
| Q969J5 | MPKHCF LGFLISFFLTGVAG | Negative |
| Q969J5 | PKHCF LGFLISFFLTGVAGT | Negative |
| Q969J5 | LTGVAGTQSTHESLKPQRVQ  | Negative |
| Q969J5 | GFLISFFLTGVAGTQSTHES  | Negative |
| Q96DR8 | LGVSIFLVSAQNPTTAAPAD  | Negative |
| Q96DR8 | GVSIFLVSAQNPTTAAPADT  | Negative |
| Q96DR8 | VLLGVSIFLVSAQNPTTAAP  | Negative |
| Q96DR8 | AVLVLLGVSIFLVSAQNPTT  | Negative |
| Q96DR8 | TYPATGPADDEAPDAETTA   | Negative |
| Q96DR8 | FLAVLVLLGVSIFLVSAQNP  | Negative |
| Q96DR8 | TTAAPADTYPATGPADDEAP  | Negative |
| Q96DR8 | VSIFLVSAQNPTTAAPADTY  | Negative |
| Q96DR8 | TAAPADTYPATGPADDEAPD  | Negative |
| Q96DR8 | APADTYPATGPADDEAPDAE  | Negative |
| Q96DR8 | AQNPTTAAPADTYPATGPAD  | Negative |
| Q96DR8 | PADTYPATGPADDEAPDAET  | Negative |
| Q96DR8 | LLGVSIFLVSAQNPTTAAPA  | Negative |

|        |                      |          |
|--------|----------------------|----------|
| Q96DR8 | LVSAQNPTTAAPADTYPATG | Negative |
| Q96DR8 | QNPTTAAPADTYPATGPADD | Negative |
| Q96DR8 | DTYPATGPADDEAPDAETTA | Negative |
| Q96DR8 | FLVSAQNPTTAAPADTYPAT | Negative |
| Q96DR8 | MKFLAVLVLLGVSIFLVSAQ | Negative |
| Q96DR8 | ADTYPATGPADDEAPDAETT | Negative |
| Q96DR8 | NPTTAAPADTYPATGPADDE | Negative |
| Q96DR8 | LVLLGVSIFLVSAQNPTTAA | Negative |
| Q96DR8 | KFLAVLVLLGVSIFLVSAQN | Negative |
| Q96DR8 | IFLVSAQNPTTAAPADTYPA | Negative |
| Q96DR8 | VSAQNPTTAAPADTYPATGP | Negative |
| Q96DR8 | SIFLVSAQNPTTAAPADTYP | Negative |
| Q96DR8 | AAPADTYPATGPADDEAPDA | Negative |
| Q96DR8 | LAVLVLLGVSIFLVSAQNPT | Negative |
| Q96DR8 | SAQNPTTAAPADTYPATGPA | Negative |
| Q96DR8 | PTTAAPADTYPATGPADDEA | Negative |
| Q96HE7 | PETAAQRCFCQVSGYLDDCT | Negative |
| Q96HE7 | GAVWLLSSGHGEEQPPETAA | Negative |
| Q96HE7 | LGAVWLLSSGHGEEQPPETA | Negative |
| Q96HE7 | RGWGFLFGLLGAVWLLSSGH | Negative |
| Q96HE7 | TAAQRCFCQVSGYLDDCTCD | Negative |
| Q96HE7 | LFGLLGAVWLLSSGHGEEQP | Negative |
| Q96HE7 | LLSSGHGEEQPPETAAQRCF | Negative |
| Q96HE7 | HGEEQPPETAAQRCFCQVSG | Negative |
| Q96HE7 | GWGFLFGLLGAVWLLSSGHG | Negative |
| Q96HE7 | SGHGEEQPPETAAQRCFCQV | Negative |
| Q96HE7 | AVWLLSSGHGEEQPPETAAQ | Negative |
| Q96HE7 | WLLSSGHGEEQPPETAAQRC | Negative |
| Q96HE7 | GRGWGFLFGLLGAVWLLSSG | Negative |
| Q96HE7 | ETAAQRCFCQVSGYLDDCTC | Negative |
| Q96HE7 | WGFLFGLLGAVWLLSSGHGE | Negative |
| Q96HE7 | PPETAAQRCFCQVSGYLDDC | Negative |
| Q96HE7 | MGRGWGFLFGLLGAVWLLSS | Negative |
| Q96HE7 | EEQPPETAAQRCFCQVSGYL | Negative |
| Q96HE7 | EQPPETAAQRCFCQVSGYLD | Negative |
| Q96HE7 | GFLFGLLGAVWLLSSGHGEE | Negative |
| Q96HE7 | SSGHGEEQPPETAAQRCFCQ | Negative |
| Q96HE7 | GLLGAVWLLSSGHGEEQPPE | Negative |
| Q96HE7 | GHGEEQPPETAAQRCFCQVS | Negative |
| Q96HE7 | QPPETAAQRCFCQVSGYLDD | Negative |
| Q96HE7 | LSSGHGEEQPPETAAQRCFC | Negative |
| Q96HE7 | VWLLSSGHGEEQPPETAAQR | Negative |
| Q96HE7 | GEEQPPETAAQRCFCQVSGY | Negative |
| Q96HE7 | FLFGLLGAVWLLSSGHGEEQ | Negative |
| Q96HE7 | LLGAVWLLSSGHGEEQPPET | Negative |
| Q96HF1 | GLFLFGQPDFSYKRSNCKPI | Negative |

|        |                       |          |
|--------|-----------------------|----------|
| Q96HF1 | MLQGPGSLLLLFLASHCCLG  | Negative |
| Q96HF1 | RGLFLFGQPDFS YKRSNCKP | Negative |
| Q96HF1 | CCLGSARGLFLFGQPDFS YK | Negative |
| Q96HF1 | ASHCCLG SARGLFLFGQPDF | Negative |
| Q96HF1 | LFLFGQPDFS YKRSNCKPIP | Negative |
| Q96HF1 | LLLLFLASHCCLG SARGLF  | Negative |
| Q96HF1 | FGQPDFS YKRSNCKPIPANL | Negative |
| Q96HF1 | ARGLFLFGQPDFS YKRSNCK | Negative |
| Q96HF1 | LFLASHCCLG SARGLFLFGQ | Negative |
| Q96HF1 | LLLFLASHCCLG SARGLFLF | Negative |
| Q96HF1 | LQGPGSLLLLFLASHCCLG S | Negative |
| Q96HF1 | QPDFS YKRSNCKPIPANLQL | Negative |
| Q96HF1 | GQPDFS YKRSNCKPIPANLQ | Negative |
| Q96HF1 | SARGLFLFGQPDFS YKRSNC | Negative |
| Q96HF1 | QGPGSLLLLFLASHCCLGSA  | Negative |
| Q96HF1 | GPGSLLLLFLASHCCLG SAR | Negative |
| Q96HF1 | LASHCCLG SARGLFLFGQPD | Negative |
| Q96HF1 | FLFGQPDFS YKRSNCKPIPA | Negative |
| Q96HF1 | LFGQPDFS YKRSNCKPIPAN | Negative |
| Q96HF1 | SHCCLG SARGLFLFGQPDFS | Negative |
| Q96HF1 | CLGSARGLFLFGQPDFS YKR | Negative |
| Q96HF1 | GSLLLLFLASHCCLG SARGL | Negative |
| Q96HF1 | LLLFLASHCCLG SARGLFL  | Negative |
| Q96HF1 | FLASHCCLG SARGLFLFGQP | Negative |
| Q96HF1 | GSARGLFLFGQPDFS YKRSN | Negative |
| Q96HF1 | HCCLGSARGLFLFGQPDFS Y | Negative |
| Q96HF1 | PGSLLLLFLASHCCLG SARG | Negative |
| Q96HF1 | LGSARGLFLFGQPDFS YKRS | Negative |
| Q96I82 | PPPTGARPSGPDYLRRGWM   | Negative |
| Q96I82 | GARPSGPDYLRRGWMRLLA   | Negative |
| Q96I82 | ALALPVLLLLLVLTTPPTG   | Negative |
| Q96I82 | VLLLLLVLTTPPTGARPS    | Negative |
| Q96I82 | PRPAAALALPVLLLLLVLT   | Negative |
| Q96I82 | LLVLTTPPTGARPSGPDY    | Negative |
| Q96I82 | VVLTTPPTGARPSGPDYLR   | Negative |
| Q96I82 | PPRPAAALALPVLLLLLVLT  | Negative |
| Q96I82 | MLPPRPAAALALPVLLLL    | Negative |
| Q96I82 | PPTGARPSGPDYLRRGWMR   | Negative |
| Q96I82 | TPPTGARPSGPDYLRRGW    | Negative |
| Q96I82 | LALPVLLLLLVLTTPPTGA   | Negative |
| Q96I82 | LPPRPAAALALPVLLLLLV   | Negative |
| Q96I82 | PTGARPSGPDYLRRGWMRL   | Negative |
| Q96I82 | LPVLLLLLVLTTPPTGARP   | Negative |
| Q96I82 | LLLVLTTPPTGARPSGPD    | Negative |
| Q96I82 | AAALALPVLLLLLVLTPPP   | Negative |
| Q96I82 | VLTPPTGARPSGPDYLRR    | Negative |

|        |                       |          |
|--------|-----------------------|----------|
| Q96I82 | TGARPSGPDYLRRGWMRLL   | Negative |
| Q96I82 | PVLLLLLVLTTPPTGARPS   | Negative |
| Q96I82 | PAAALALPVLLLLLVLTTP   | Negative |
| Q96I82 | ARPSGPDYLRRGWMRLAE    | Negative |
| Q96I82 | LTPPTGARPSGPDYLRRG    | Negative |
| Q96I82 | ALPVLLLLLVLTTPPTGAR   | Negative |
| Q96I82 | AALALPVLLLLLVLTTPPT   | Negative |
| Q96I82 | RPAAALALPVLLLLLVLTTP  | Negative |
| Q96I82 | LVLTTPPTGARPSGPDYL    | Negative |
| Q96I82 | PPRPAAALALPVLLLLLV    | Negative |
| Q96I82 | LLLLVLTTPPTGARPSGP    | Negative |
| Q96PD4 | EAAARKIPKVGHTFFQKPES  | Negative |
| Q96PD4 | SEAAARKIPKVGHTFFQKPE  | Negative |
| Q96PD4 | ILGLAFLSEAAARKIPKVGH  | Negative |
| Q96PD4 | TVKTLHGPA MVKYLLLSILG | Negative |
| Q96PD4 | LLLSILGLAFLSEAAARKIP  | Negative |
| Q96PD4 | HGPAMVKYLLLSILGLAFLS  | Negative |
| Q96PD4 | SILGLAFLSEAAARKIPKVG  | Negative |
| Q96PD4 | TLHGPA MVKYLLLSILGLAF | Negative |
| Q96PD4 | PAMVKYLLLSILGLAFLSEA  | Negative |
| Q96PD4 | KTLHGPA MVKYLLLSILGLA | Negative |
| Q96PD4 | VKYLLLSILGLAFLSEAAAR  | Negative |
| Q96PD4 | AFLSEAAARKIPKVGHTFFQ  | Negative |
| Q96PD4 | VKTLHGPA MVKYLLLSILGL | Negative |
| Q96PD4 | AAARKIPKVGHTFFQKPESC  | Negative |
| Q96PD4 | MVKYLLLSILGLAFLSEAAA  | Negative |
| Q96PD4 | YLLLSILGLAFLSEAAARKI  | Negative |
| Q96PD4 | ARKIPKVGHTFFQKPESC    | Negative |
| Q96PD4 | LSILGLAFLSEAAARKIPKV  | Negative |
| Q96PD4 | AARKIPKVGHTFFQKPESCP  | Negative |
| Q96PD4 | GPAMVKYLLLSILGLAFLSE  | Negative |
| Q96PD4 | FLSEAAARKIPKVGHTFFQK  | Negative |
| Q96PD4 | AMVKYLLLSILGLAFLSEAA  | Negative |
| Q96PD4 | LSEAAARKIPKVGHTFFQKP  | Negative |
| Q96PD4 | GLAFLSEAAARKIPKVGHTF  | Negative |
| Q96PD4 | LHGPA MVKYLLLSILGLAFL | Negative |
| Q96PD4 | LGLAFLSEAAARKIPKVGHT  | Negative |
| Q96PD4 | MTVKTLHGPA MVKYLLLSIL | Negative |
| Q96PD4 | KYLLLSILGLAFLSEAAARK  | Negative |
| Q96PD4 | LAFLSEAAARKIPKVGHTFF  | Negative |
| Q96PD5 | LWSDPGTASLPLLMDSVIQA  | Negative |
| Q96PD5 | WSDPGTASLPLLMDSVIQAL  | Negative |
| Q96PD5 | LLMDSVIQALAELEQKVPA   | Negative |
| Q96PD5 | SVIQALAELEQKVPA AKTRH | Negative |
| Q96PD5 | GLLWSDPGTASLPLLMDSV   | Negative |
| Q96PD5 | DSVIQALAELEQKVPA AKTR | Negative |

|        |                        |          |
|--------|------------------------|----------|
| Q96PD5 | SLPLLMDSVIQALAELEQKV   | Negative |
| Q96PD5 | LPLLMDSVIQALAELEQKVP   | Negative |
| Q96PD5 | LLWSDPGTASLPLLMDSVI    | Negative |
| Q96PD5 | SDPGTASLPLLMDSVIQALA   | Negative |
| Q96PD5 | LMDSVIQALAELEQKVPAAK   | Negative |
| Q96PD5 | ASLPLLMDSVIQALAELEQK   | Negative |
| Q96PD5 | LWILLGLLLWSDPGTASLPL   | Negative |
| Q96PD5 | LLGLLLWSDPGTASLPLLMD   | Negative |
| Q96PD5 | TASLPLLMDSVIQALAELEQ   | Negative |
| Q96PD5 | VLWILLGLLLWSDPGTASLP   | Negative |
| Q96PD5 | MDSVIQALAELEQKVPAAKT   | Negative |
| Q96PD5 | PLLMDSVIQALAELEQKVPA   | Negative |
| Q96PD5 | DPGTASLPLLMDSVIQALAE   | Negative |
| Q96PD5 | PGTASLPLLMDSVIQALAE    | Negative |
| Q96PD5 | VIQALAELEQKVPAAKTRHT   | Negative |
| Q96PD5 | ILLGLLLWSDPGTASLPLLM   | Negative |
| Q96PD5 | QGVLOWILLGLLLWSDPGTAS  | Negative |
| Q96PD5 | GVLWILLGLLLWSDPGTASL   | Negative |
| Q96PD5 | LLWSDPGTASLPLLMDSVIQ   | Negative |
| Q96PD5 | GTASLPLLMDSVIQALAELE   | Negative |
| Q96PD5 | LGLLLWSDPGTASLPLLMDS   | Negative |
| Q96PD5 | AQGVLOWILLGLLLWSDPGTA  | Negative |
| Q96PD5 | MAQGVLOWILLGLLLWSDPGT  | Negative |
| Q96QR1 | SSAAFLVGS AKPVAQPVA    | Negative |
| Q96QR1 | GLCVALSCSSAAFLVGS AK   | Negative |
| Q96QR1 | AFLVGS AKPVAQPVA ALESA | Negative |
| Q96QR1 | CSSAAFLVGS AKPVAQPVA   | Negative |
| Q96QR1 | LGLCVALSCSSAAFLVGS A   | Negative |
| Q96QR1 | ALLGLCVALSCSSAAFLVG    | Negative |
| Q96QR1 | LSCSSAAFLVGS AKPVAQP   | Negative |
| Q96QR1 | AQPVA ALESAAEAGAGTLAN  | Negative |
| Q96QR1 | AAFLVGS AKPVAQPVA ALE  | Negative |
| Q96QR1 | VAQPVA ALESAAEAGAGTLA  | Negative |
| Q96QR1 | KLAALLGLCVALSCSSAAAF   | Negative |
| Q96QR1 | SAAFLVGS AKPVAQPVAAL   | Negative |
| Q96QR1 | KPVAQPVA ALESAAEAGAGT  | Negative |
| Q96QR1 | AALLGLCVALSCSSAAFLV    | Negative |
| Q96QR1 | VALSCSSAAFLVGS AKPVA   | Negative |
| Q96QR1 | PVAQPVA ALESAAEAGAGTL  | Negative |
| Q96QR1 | AKPVAQPVA ALESAAEAGAG  | Negative |
| Q96QR1 | CVALSCSSAAFLVGS AKPV   | Negative |
| Q96QR1 | AAFLVGS AKPVAQPVA ALES | Negative |
| Q96QR1 | SCSSAAFLVGS AKPVAQPV   | Negative |
| Q96QR1 | LVGS AKPVAQPVA ALESAAE | Negative |
| Q96QR1 | VGS AKPVAQPVA ALESAAEA | Negative |
| Q96QR1 | LCVALSCSSAAFLVGS AKP   | Negative |

|        |                        |          |
|--------|------------------------|----------|
| Q96QR1 | FLVGS AKPVAQPVA ALESAA | Negative |
| Q96QR1 | LAALLGLCVALSCSSAA AFL  | Negative |
| Q96QR1 | MKLAALLGLCVALSCSSAAA   | Negative |
| Q96QR1 | SAKPVAQPVA ALESAAEAGA  | Negative |
| Q96QR1 | ALSCSSAA AFLVGS AKPVAQ | Negative |
| Q96QR1 | GSAKPVAQPVA ALESAAEAG  | Negative |
| Q96RQ9 | MAPLALHLLVLVPILLSLVA   | Negative |
| Q96RQ9 | VLVPILLSLVASQDWKAERS   | Negative |
| Q96RQ9 | SLVASQDWKAERSQDPFEKC   | Negative |
| Q96RQ9 | KAERSQDPFEKCMQDPDYEQ   | Negative |
| Q96RQ9 | DWKAERSQDPFEKCMQDPDY   | Negative |
| Q96RQ9 | PILLSLVASQDWKAERSQDP   | Negative |
| Q96RQ9 | LVASQDWKAERSQDPFEKCM   | Negative |
| Q96RQ9 | ILLSLVASQDWKAERSQDPF   | Negative |
| Q96RQ9 | SQDPFEKCMQDPDYEQLLKV   | Negative |
| Q96RQ9 | APLALHLLVLVPILLSLVAS   | Negative |
| Q96RQ9 | QDPFEKCMQDPDYEQLLKVV   | Negative |
| Q96RQ9 | VASQDWKAERSQDPFEKCMQ   | Negative |
| Q96RQ9 | LVPILLSLVASQDWKAERSQ   | Negative |
| Q96RQ9 | LLSLVASQDWKAERSQDPFE   | Negative |
| Q96RQ9 | ASQDWKAERSQDPFEKCMQD   | Negative |
| Q96RQ9 | LALHLLVLVPILLSLVASQD   | Negative |
| Q96RQ9 | AERSQDPFEKCMQDPDYEQL   | Negative |
| Q96RQ9 | VPILLSLVASQDWKAERSQD   | Negative |
| Q96RQ9 | ERSQDPFEKCMQDPDYEQLL   | Negative |
| Q96RQ9 | LLVLVPILLSLVASQDWKAE   | Negative |
| Q96RQ9 | RSQDPFEKCMQDPDYEQLLK   | Negative |
| Q96RQ9 | ALHLLVLVPILLSLVASQDW   | Negative |
| Q96RQ9 | PLALHLLVLVPILLSLVASQ   | Negative |
| Q96RQ9 | WKAERSQDPFEKCMQDPDYE   | Negative |
| Q96RQ9 | LVLVPILLSLVASQDWKAER   | Negative |
| Q96RQ9 | SQDWKAERSQDPFEKCMQDP   | Negative |
| Q96RQ9 | QDWKAERSQDPFEKCMQDPD   | Negative |
| Q96RQ9 | LSLVASQDWKAERSQDPFEK   | Negative |
| Q96RQ9 | LHLLVLVPILLSLVASQDWK   | Negative |
| Q96S96 | MVVTGDEDENSPCAHEALLD   | Negative |
| Q96S96 | ALLGLMMVVTGDEDENSPC    | Negative |
| Q96S96 | DENSPCAHEALLDEDTLFCQ   | Negative |
| Q96S96 | CAHEALLDEDTLFCQGLEVF   | Negative |
| Q96S96 | AALLGLMMVVTGDEDENSP    | Negative |
| Q96S96 | SPCAHEALLDEDTLFCQGLE   | Negative |
| Q96S96 | VVTGDEDENSPCAHEALLDE   | Negative |
| Q96S96 | WTMRLVTAALLGLMMVVTG    | Negative |
| Q96S96 | LLGLMMVVTGDEDENSPCA    | Negative |
| Q96S96 | TAALLGLMMVVTGDEDENS    | Negative |
| Q96S96 | NSPCAHEALLDEDTLFCQGL   | Negative |

|        |                        |          |
|--------|------------------------|----------|
| Q96S96 | LMMVVTGDEDEDENSPCAHEAL | Negative |
| Q96S96 | LVTAALLLGLMMVVTGDEDE   | Negative |
| Q96S96 | EDENSPCAHEALLDEDTLFC   | Negative |
| Q96S96 | PCAHEALLDEDTLFCQGLEV   | Negative |
| Q96S96 | ENSPCAHEALLDEDTLFCQG   | Negative |
| Q96S96 | MRLVTAALLLGLMMVVTGDE   | Negative |
| Q96S96 | LGLMMVVTGDEDEDENSPCAHE | Negative |
| Q96S96 | LLGLMMVVTGDEDEDENSPCAH | Negative |
| Q96S96 | GLMMVVTGDEDEDENSPCAHEA | Negative |
| Q96S96 | GWTMRLVTAALLLGLMMVVT   | Negative |
| Q96S96 | DEDENSPCAHEALLDEDTLF   | Negative |
| Q96S96 | MMVVTGDEDEDENSPCAHEALL | Negative |
| Q96S96 | RLVTAALLLGLMMVVTGDED   | Negative |
| Q96S96 | GDEDEDENSPCAHEALLDEDTL | Negative |
| Q96S96 | VTGDEDEDENSPCAHEALLDED | Negative |
| Q96S96 | TMRLVTAALLLGLMMVVTGD   | Negative |
| Q96S96 | MGWTMRLVTAALLLGLMMVV   | Negative |
| Q96S96 | TGDEDEDENSPCAHEALLDEDT | Negative |
| Q96TU3 | LSVFMLMGITYAFNYDQPYR   | Negative |
| Q96TU3 | YHFSPQKNWMNDPNGLLYHN   | Negative |
| Q96TU3 | TYAFNYDQPYRGQYHFSPQK   | Negative |
| Q96TU3 | ITYAFNYDQPYRGQYHFSPQ   | Negative |
| Q96TU3 | YDQPYRGQYHFSPQKNWMND   | Negative |
| Q96TU3 | PYRGQYHFSPQKNWMNDPNG   | Negative |
| Q96TU3 | FMLMGITYAFNYDQPYRGQY   | Negative |
| Q96TU3 | NYDQPYRGQYHFSPQKNWMN   | Negative |
| Q96TU3 | LSKALSVFMLMGITYAFNYD   | Negative |
| Q96TU3 | GITYAFNYDQPYRGQYHFSP   | Negative |
| Q96TU3 | KALSVFMLMGITYAFNYDQP   | Negative |
| Q96TU3 | ALSVFMLMGITYAFNYDQPY   | Negative |
| Q96TU3 | QPYRGQYHFSPQKNWMNDPN   | Negative |
| Q96TU3 | FNVDQPYRGQYHFSPQKNWM   | Negative |
| Q96TU3 | SVFMLMGITYAFNYDQPYRG   | Negative |
| Q96TU3 | RGQYHFSPQKNWMNDPNGLL   | Negative |
| Q96TU3 | APLSKALSVFMLMGITYAFN   | Negative |
| Q96TU3 | PLSKALSVFMLMGITYAFNY   | Negative |
| Q96TU3 | YAFNYDQPYRGQYHFSPQKN   | Negative |
| Q96TU3 | DQPYRGQYHFSPQKNWMNDP   | Negative |
| Q96TU3 | AFNYDQPYRGQYHFSPQKNW   | Negative |
| Q96TU3 | QYHFSPQKNWMNDPNGLLYH   | Negative |
| Q96TU3 | MLMGITYAFNYDQPYRGQYH   | Negative |
| Q96TU3 | MAPLSKALSVFMLMGITYAF   | Negative |
| Q96TU3 | GQYHFSPQKNWMNDPNGLLY   | Negative |
| Q96TU3 | YRGQYHFSPQKNWMNDPNGL   | Negative |
| Q96TU3 | VFMLMGITYAFNYDQPYRGQ   | Negative |
| Q96TU3 | MGITYAFNYDQPYRGQYHFS   | Negative |

|        |                      |          |
|--------|----------------------|----------|
| Q96TU3 | LMGITYAFNYDQPYRGQYHF | Negative |
| Q96X54 | AHGVSLKVSTQGGNSSSPIL | Negative |
| Q96X54 | VQHAHGVSLKVSTQGGNSSS | Negative |
| Q96X54 | ALSGVSALSLLLCLVQHAHG | Negative |
| Q96X54 | SLKVSTQGGNSSSPILYGFM | Negative |
| Q96X54 | LSGVSALSLLLCLVQHAHGV | Negative |
| Q96X54 | VAFSALSGVSALSLLLCLVQ | Negative |
| Q96X54 | AFSALSGVSALSLLLCLVQH | Negative |
| Q96X54 | FSALSGVSALSLLLCLVQHA | Negative |
| Q96X54 | LLCLVQHAHGVSLKVSTQGG | Negative |
| Q96X54 | VSLKVSTQGGNSSSPILYGF | Negative |
| Q96X54 | SLLLCLVQHAHGVSLKVSTQ | Negative |
| Q96X54 | CLVQHAHGVSLKVSTQGGNS | Negative |
| Q96X54 | KVSTQGGNSSSPILYGFMFE | Negative |
| Q96X54 | LLLCLVQHAHGVSLKVSTQG | Negative |
| Q96X54 | SALSGVSALSLLLCLVQHAH | Negative |
| Q96X54 | MVAFSALSGVSALSLLLCLV | Negative |
| Q96X54 | LCLVQHAHGVSLKVSTQGGN | Negative |
| Q96X54 | VSTQGGNSSSPILYGFMFED | Negative |
| Q96X54 | LSLLLCLVQHAHGVSLKVST | Negative |
| Q96X54 | LVQHAHGVSLKVSTQGGNSS | Negative |
| Q96X54 | ALSLLLCLVQHAHGVSLKVS | Negative |
| Q96X54 | GVSLKVSTQGGNSSSPILYG | Negative |
| Q96X54 | VSALSLLLCLVQHAHGVSLK | Negative |
| Q96X54 | SGVSALSLLLCLVQHAHGV  | Negative |
| Q96X54 | LKVSTQGGNSSSPILYGFMF | Negative |
| Q96X54 | HGVSLKVSTQGGNSSSPILY | Negative |
| Q96X54 | QHAHGVSLKVSTQGGNSSSP | Negative |
| Q96X54 | GVSALSLLLCLVQHAHGVSL | Negative |
| Q96X54 | HAHGVSLKVSTQGGNSSSPI | Negative |
| Q98967 | NMNDQGTRDALQFAVVEHNC | Negative |
| Q98967 | VPLLAVAFTVANAGLVGGPM | Negative |
| Q98967 | TVANAGLVGGPMDANMNDQG | Negative |
| Q98967 | AVAFTVANAGLVGGPMDANM | Negative |
| Q98967 | EWKIVVPLLAVAFTVANAGL | Negative |
| Q98967 | KIVVPLLAVAFTVANAGLVG | Negative |
| Q98967 | LLAVAFTVANAGLVGGPMDA | Negative |
| Q98967 | GGPMDANMNDQGTRDALQFA | Negative |
| Q98967 | VAFTVANAGLVGGPMDANMN | Negative |
| Q98967 | PLLAVAFTVANAGLVGGPMD | Negative |
| Q98967 | PMDANMNDQGTRDALQFAVV | Negative |
| Q98967 | GLVGGPMDANMNDQGTRDAL | Negative |
| Q98967 | MNDQGTRDALQFAVVEHNKK | Negative |
| Q98967 | AFTVANAGLVGGPMDANMND | Negative |
| Q98967 | WKIVVPLLAVAFTVANAGLV | Negative |
| Q98967 | NAGLVGGPMDANMNDQGTRD | Negative |



|        |                       |          |
|--------|-----------------------|----------|
| Q98967 | VANAGLVGGPMDANMNDQGT  | Negative |
| Q98967 | LAVAFTVANAGLVGGPMDAN  | Negative |
| Q98967 | MEWKIVVPLLAVAFTVANAG  | Negative |
| Q98967 | DANMNDQGTRDALQFAVVEH  | Negative |
| Q98967 | GPM DANMNDQGTRDALQFAV | Negative |
| Q98967 | FTVANAGLVGGPMDANMNDQ  | Negative |
| Q98967 | LVGGPMDANMNDQGTRDALQ  | Negative |
| Q98967 | VVPLLAVAFTVANAGLVGGP  | Negative |
| Q98967 | MDANMNDQGTRDALQFAVVE  | Negative |
| Q98967 | AGLVGGPMDANMNDQGTRDA  | Negative |
| Q98967 | ANMNDQGTRDALQFAVVEHN  | Negative |
| Q98967 | VGGPMDANMNDQGTRDALQF  | Negative |
| Q98967 | ANAGLVGGPMDANMNDQGTR  | Negative |
| Q99003 | VCCNISQAAVSFIGSTENDV  | Negative |
| Q99003 | FIGSTENDVGPSLGYSRTH   | Negative |
| Q99003 | VFILVCCNISQAAVSFIGST  | Negative |
| Q99003 | ILVCCNISQAAVSFIGSTEN  | Negative |
| Q99003 | NISQAAVSFIGSTENDVGPS  | Negative |
| Q99003 | MTNFYKVFLAVFILVCCNIS  | Negative |
| Q99003 | AVFILVCCNISQAAVSFIGS  | Negative |
| Q99003 | ISQAAVSFIGSTENDVGPSL  | Negative |
| Q99003 | LAVFILVCCNISQAAVSFIG  | Negative |
| Q99003 | GSTENDVGPSLGYSRTHAM   | Negative |
| Q99003 | LVCCNISQAAVSFIGSTEND  | Negative |
| Q99003 | VSFIGSTENDVGPSLGYSR   | Negative |
| Q99003 | STENDVGPSLGYSRTHAMD   | Negative |
| Q99003 | KVFLAVFILVCCNISQAAVS  | Negative |
| Q99003 | QAAVSFIGSTENDVGPSLGS  | Negative |
| Q99003 | NFYKVFLAVFILVCCNISQA  | Negative |
| Q99003 | AVSFIGSTENDVGPSLGYS   | Negative |
| Q99003 | IGSTENDVGPSLGYSRTHA   | Negative |
| Q99003 | FILVCCNISQAAVSFIGSTE  | Negative |
| Q99003 | SQAAVSFIGSTENDVGPSLG  | Negative |
| Q99003 | AAVSFIGSTENDVGPSLGSY  | Negative |
| Q99003 | YKVFLAVFILVCCNISQAAV  | Negative |
| Q99003 | CNISQAAVSFIGSTENDVGP  | Negative |
| Q99003 | FYKVFLAVFILVCCNISQAA  | Negative |
| Q99003 | VFLAVFILVCCNISQAAVSF  | Negative |
| Q99003 | TENDVGPSLGYSRTHAMDN   | Negative |
| Q99003 | SFIGSTENDVGPSLGYSRT   | Negative |
| Q99003 | CCNISQAAVSFIGSTENDVG  | Negative |
| Q99003 | TNFYKVFLAVFILVCCNISQ  | Negative |
| Q99013 | LFTV GQLIFLFWTMRITEAR | Negative |
| Q99013 | SLFTV GQLIFLFWTMRITEA | Negative |
| Q99013 | AAKAAPAAAAPAAAAPDTA   | Negative |
| Q99013 | MRITEARPDPAAKAAPAAAA  | Negative |

|        |                      |          |
|--------|----------------------|----------|
| Q99013 | PAAKAAPAAAAPAAAAPDT  | Negative |
| Q99013 | RITEARPDPAAKAAPAAAAP | Negative |
| Q99013 | IFLFWTMRITEARPDPAAKA | Negative |
| Q99013 | QLIFLFWTMRITEARPDPA  | Negative |
| Q99013 | AKAAPAAAAPAAAAPDTAS  | Negative |
| Q99013 | PDPAAKAAPAAAAPAAAAP  | Negative |
| Q99013 | FWTMRITEARPDPAAKAAPA | Negative |
| Q99013 | VGQLIFLFWTMRITEARPD  | Negative |
| Q99013 | ARPDPAAKAAPAAAAPAAA  | Negative |
| Q99013 | LFWTMRITEARPDPAAKAAP | Negative |
| Q99013 | EARPDPAAKAAPAAAAPAA  | Negative |
| Q99013 | FLFWTMRITEARPDPAAKAA | Negative |
| Q99013 | TMRITEARPDPAAKAAPAAA | Negative |
| Q99013 | TEARPDPAAKAAPAAAAPVA | Negative |
| Q99013 | LIFLFWTMRITEARPDPAAK | Negative |
| Q99013 | LSLFTVGQLIFLFWTMRITE | Negative |
| Q99013 | DPAAKAAPAAAAPAAAAPD  | Negative |
| Q99013 | FTVGQLIFLFWTMRITEARP | Negative |
| Q99013 | WTMRITEARPDPAAKAAPAA | Negative |
| Q99013 | KAAPAAAAPAAAAPDTASD  | Negative |
| Q99013 | MALSLFTVGQLIFLFWTMRI | Negative |
| Q99013 | TVGQLIFLFWTMRITEARPD | Negative |
| Q99013 | ITEARPDPAAKAAPAAAAPV | Negative |
| Q99013 | ALSLFTVGQLIFLFWTMRI  | Negative |
| Q99013 | RPDPAAKAAPAAAAPAAA   | Negative |
| Q99217 | AAFAMPLPPHPGHPGYINFS | Negative |
| Q99217 | PGYINFSYEVLTPWKYQSI  | Negative |
| Q99217 | HPGHPGYINFSYEVLTPWK  | Negative |
| Q99217 | PGHPGYINFSYEVLTPWKY  | Negative |
| Q99217 | PPHPGHPGYINFSYEVLTP  | Negative |
| Q99217 | GYINFSYEVLTPWKYQSIR  | Negative |
| Q99217 | GHPGYINFSYEVLTPWKYQ  | Negative |
| Q99217 | LGAAFAMPLPPHPGHPGYIN | Negative |
| Q99217 | TWILFACLLGAAFAMPLPPH | Negative |
| Q99217 | PLPPHPGHPGYINFSYEVL  | Negative |
| Q99217 | NFSYEVLTPWKYQSIRPPY  | Negative |
| Q99217 | LFACLLGAAFAMPLPPHPGH | Negative |
| Q99217 | AFAMPLPPHPGHPGYINFSY | Negative |
| Q99217 | MPLPPHPGHPGYINFSYEVL | Negative |
| Q99217 | MGTWILFACLLGAAFAMPLP | Negative |
| Q99217 | CLLGAAFAMPLPPHPGHPGY | Negative |
| Q99217 | LPPHPGHPGYINFSYEVLTP | Negative |
| Q99217 | AMPLPPHPGHPGYINFSYEV | Negative |
| Q99217 | ACLLGAAFAMPLPPHPGHPG | Negative |
| Q99217 | FAMPLPPHPGHPGYINFSYE | Negative |
| Q99217 | PHPGHPGYINFSYEVLTPK  | Negative |

|        |                      |          |
|--------|----------------------|----------|
| Q99217 | LLGAAFAMPLPPHPGHPGYI | Negative |
| Q99217 | HPGYINFSEYVLTPLKWYQS | Negative |
| Q99217 | YINFSEYVLTPLKWYQSIRP | Negative |
| Q99217 | WILFACLLGAAFAMPLPPHP | Negative |
| Q99217 | FACLLGAAFAMPLPPHPGHP | Negative |
| Q99217 | ILFACLLGAAFAMPLPPHPG | Negative |
| Q99217 | GAAFAMPLPPHPGHPGYINF | Negative |
| Q99217 | INFSEYVLTPLKWYQSIRPP | Negative |
| Q99289 | LASAVAEPTLSPEMVSAE   | Negative |
| Q99289 | TLLTALLPLASAVAEPTLS  | Negative |
| Q99289 | LPLASAVAEPTLSPEMVSA  | Negative |
| Q99289 | EMVSASEVISTQENQTYTYV | Negative |
| Q99289 | PLASAVAEPTLSPEMVSAE  | Negative |
| Q99289 | ALLPLASAVAEPTLSPEMV  | Negative |
| Q99289 | PEMVSAEPTLSPEMVSAE   | Negative |
| Q99289 | TALLPLASAVAEPTLSPEM  | Negative |
| Q99289 | LTALLPLASAVAEPTLSPE  | Negative |
| Q99289 | TLSPPEMVSAEPTLSPEM   | Negative |
| Q99289 | ITLLTALLPLASAVAEPTL  | Negative |
| Q99289 | KKTITLLTALLPLASAVAE  | Negative |
| Q99289 | MMKKTITLLTALLPLASAV  | Negative |
| Q99289 | EPTLSPEMVSAEPTLSPE   | Negative |
| Q99289 | LLTALLPLASAVAEPTLSP  | Negative |
| Q99289 | AVAEPTLSPEMVSAEPTL   | Negative |
| Q99289 | MVSASEVISTQENQTYTYVR | Negative |
| Q99289 | LLPLASAVAEPTLSPEMVS  | Negative |
| Q99289 | SPPEMVSAEPTLSPEMVS   | Negative |
| Q99289 | MKKTITLLTALLPLASAVAE | Negative |
| Q99289 | SAVAEPTLSPEMVSAEPTI  | Negative |
| Q99289 | EEPTLSPEMVSAEPTLSPE  | Negative |
| Q99289 | PTLSPEMVSAEPTLSPEM   | Negative |
| Q99289 | LSPPEMVSAEPTLSPEMVS  | Negative |
| Q99289 | VAEPTLSPEMVSAEPTLS   | Negative |
| Q99289 | KTITLLTALLPLASAVAEPT | Negative |
| Q99289 | AEPTLSPEMVSAEPTLSPE  | Negative |
| Q99289 | VSASEVISTQENQTYTYVRC | Negative |
| Q99289 | ASAVAEPTLSPEMVSAEPT  | Negative |
| Q99372 | AGLTAAPQPGVLLILLNL   | Negative |
| Q99372 | NLLHPAQPGGVPGAVPGGV  | Negative |
| Q99372 | TAAVPQPGVLLILLNLHP   | Negative |
| Q99372 | ILLNLLHPAQPGGVPGAVP  | Negative |
| Q99372 | LHPAQPGGVPGAVPGGVPG  | Negative |
| Q99372 | AVPQPGVLLILLNLHPAQ   | Negative |
| Q99372 | LTAAPQPGVLLILLNLHP   | Negative |
| Q99372 | MAGLTAAPQPGVLLILLNL  | Negative |
| Q99372 | AAVPQPGVLLILLNLHPA   | Negative |

|        |                      |          |
|--------|----------------------|----------|
| Q99372 | LLHPAQPGGVPGAVPGGVPG | Negative |
| Q99372 | GVLLILLLNLLHPAQPGGV  | Negative |
| Q99372 | PAQPGGVPGAVPGGVPGGLP | Negative |
| Q99372 | GGVPGAVPGGVPGGLPGGV  | Negative |
| Q99372 | PGGVPGAVPGGVPGGLPGGV | Negative |
| Q99372 | LLNLLHPAQPGGVPGAVPGG | Negative |
| Q99372 | GVPGAVPGGVPGGLPGGVPG | Negative |
| Q99372 | LLLNLLHPAQPGGVPGAVPG | Negative |
| Q99372 | PGVLLILLLNLLHPAQPGGV | Negative |
| Q99372 | GLTAAVPQPGVLLILLLNLL | Negative |
| Q99372 | HPAQPGGVPGAVPGGVPGGL | Negative |
| Q99372 | PQPGVLLILLLNLLHPAQPG | Negative |
| Q99372 | LNLLHPAQPGGVPGAVPGGV | Negative |
| Q99372 | QPGGVPGAVPGGVPGGLPGG | Negative |
| Q99372 | LLILLLNLLHPAQPGGVPGA | Negative |
| Q99372 | VPQPGVLLILLLNLLHPAQ  | Negative |
| Q99372 | LILLLNLLHPAQPGGVPGAV | Negative |
| Q99372 | VPGAVPGGVPGGLPGGVPGG | Negative |
| Q99372 | AQPGGVPGAVPGGVPGGLPG | Negative |
| Q99372 | QPGVLLILLLNLLHPAQPGG | Negative |
| Q99519 | ALPDRRWGPRILGFWGGCRV | Negative |
| Q99519 | RILGFWGGCRVWVFAAIFLL | Negative |
| Q99519 | LGFWGGCRVWVFAAIFLLLS | Negative |
| Q99519 | WVFAAIFLLLSLAASWSKAE | Negative |
| Q99519 | CRVWVFAAIFLLLSLAASWS | Negative |
| Q99519 | GGCRVWVFAAIFLLLSLAAS | Negative |
| Q99519 | GERPSTALPDRRWGPRILGF | Negative |
| Q99519 | PSTALPDRRWGPRILGFWGG | Negative |
| Q99519 | WGPRILGFWGGCRVWVFAAI | Negative |
| Q99519 | FWGGCRVWVFAAIFLLLSLA | Negative |
| Q99519 | DRRWGPRILGFWGGCRVWVF | Negative |
| Q99519 | STALPDRRWGPRILGFWGGC | Negative |
| Q99519 | GPRILGFWGGCRVWVFAAIF | Negative |
| Q99519 | GCRVWVFAAIFLLLSLAASW | Negative |
| Q99519 | PRILGFWGGCRVWVFAAIFL | Negative |
| Q99519 | MTGERPSTALPDRRWGPRIL | Negative |
| Q99519 | TGERPSTALPDRRWGPRILG | Negative |
| Q99519 | PDRRWGPRILGFWGGCRVWV | Negative |
| Q99519 | VFAAIFLLLSLAASWSKAEN | Negative |
| Q99519 | RPSTALPDRRWGPRILGFWG | Negative |
| Q99519 | TALPDRRWGPRILGFWGGCR | Negative |
| Q99519 | VWVFAAIFLLLSLAASWSKA | Negative |
| Q99519 | LPDRRWGPRILGFWGGCRVW | Negative |
| Q99519 | ERPSTALPDRRWGPRILGFW | Negative |
| Q99519 | RWGPRILGFWGGCRVWVF   | Negative |
| Q99519 | ILGFWGGCRVWVF        | Negative |

|        |                       |          |
|--------|-----------------------|----------|
| Q99519 | RVWVFAAIFLLLSLAASWSK  | Negative |
| Q99519 | WGGCRVWVFAAIFLLLSLAA  | Negative |
| Q99519 | RRWGPRILGFWGGCRVWVFA  | Negative |
| Q99519 | GFWGGCRVWVFAAIFLLLSL  | Negative |
| Q99538 | AVPIDDPEDGGKHWVIVAG   | Negative |
| Q99538 | WVIVAGSNGWYNYRHQADA   | Negative |
| Q99538 | VALGIGAVPIDDPEDGGKHW  | Negative |
| Q99538 | GAVPIDDPEDGGKHWVIVA   | Negative |
| Q99538 | DPEDGGKHWVIVAGSNGWY   | Negative |
| Q99538 | GIGAVPIDDPEDGGKHWVVI  | Negative |
| Q99538 | GKHWVIVAGSNGWYNYRHQ   | Negative |
| Q99538 | GGKHWVIVAGSNGWYNYRH   | Negative |
| Q99538 | EDGGKHWVIVAGSNGWYNY   | Negative |
| Q99538 | VWKVAVFLSVALGIGAVPID  | Negative |
| Q99538 | DGGKHWVIVAGSNGWYNYR   | Negative |
| Q99538 | VFLSVALGIGAVPIDDPEDG  | Negative |
| Q99538 | PIDDPEDGGKHWVIVAGSN   | Negative |
| Q99538 | MVWKVAVFLSVALGIGAVPI  | Negative |
| Q99538 | KVAVFLSVALGIGAVPIDDP  | Negative |
| Q99538 | FLSVALGIGAVPIDDPEDGG  | Negative |
| Q99538 | LSVALGIGAVPIDDPEDGGK  | Negative |
| Q99538 | VAVFLSVALGIGAVPIDDPE  | Negative |
| Q99538 | LGIGAVPIDDPEDGGKHWVV  | Negative |
| Q99538 | DDPEDGGKHWVIVAGSNGW   | Negative |
| Q99538 | SVALGIGAVPIDDPEDGGKH  | Negative |
| Q99538 | PEDGGKHWVIVAGSNGWYN   | Negative |
| Q99538 | ALGIGAVPIDDPEDGGKHWV  | Negative |
| Q99538 | VPIDDPEDGGKHWVIVAGS   | Negative |
| Q99538 | AVFLSVALGIGAVPIDDPED  | Negative |
| Q99538 | IDDPEDGGKHWVIVAGSNG   | Negative |
| Q99538 | KHWVIVAGSNGWYNYRHQA   | Negative |
| Q99538 | IGAVPIDDPEDGGKHWVIV   | Negative |
| Q99538 | HWVIVAGSNGWYNYRHQAD   | Negative |
| Q99616 | MKVSALLCLLLMTAAFNPNQ  | Negative |
| Q99616 | VSAVLLCLLLMTAAFNPPQL  | Negative |
| Q99616 | NVPSTCCFTFSSKKISLQRL  | Negative |
| Q99616 | PQGLAQPDALNVPSTCCFTF  | Negative |
| Q99616 | DALNVPSTCCFTFSSKKISL  | Negative |
| Q99616 | ALNVPSTCCFTFSSKKISLQ  | Negative |
| Q99616 | LLCLLLMTAAFNPPQGLAQPD | Negative |
| Q99616 | TAAFNPPQGLAQPDALNVPST | Negative |
| Q99616 | FNPPQGLAQPDALNVPSTCCF | Negative |
| Q99616 | PDALNVPSTCCFTFSSKKIS  | Negative |
| Q99616 | VLLCLLLMTAAFNPPQGLAQP | Negative |
| Q99616 | LLLMTAAFNPPQGLAQPDALN | Negative |
| Q99616 | CLLLMTAAFNPPQGLAQPDAL | Negative |

|        |                       |          |
|--------|-----------------------|----------|
| Q99616 | VPSTCCFTFSSKKISLQRLK  | Negative |
| Q99616 | QGLAQPDALNVPSTCCFTFS  | Negative |
| Q99616 | LMTAAFNPPQGLAQPDALNVP | Negative |
| Q99616 | MTAAFNPPQGLAQPDALNVP  | Negative |
| Q99616 | GLAQPDALNVPSTCCFTFSS  | Negative |
| Q99616 | QPDALNVPSTCCFTFSSKKI  | Negative |
| Q99616 | AVLLCLLLMTAAFNPPQGLAQ | Negative |
| Q99616 | LLMTAAFNPPQGLAQPDALNV | Negative |
| Q99616 | AAFNPPQGLAQPDALNVPSTC | Negative |
| Q99616 | LNVPSTCCFTFSSKKISLQR  | Negative |
| Q99616 | NPQGLAQPDALNVPSTCCFT  | Negative |
| Q99616 | AFNPPQGLAQPDALNVPSTCC | Negative |
| Q99616 | LCLLLMTAAFNPPQGLAQPDA | Negative |
| Q99616 | LAQPDALNVPSTCCFTFSSK  | Negative |
| Q99616 | SAVLLCLLLMTAAFNPPQGLA | Negative |
| Q99616 | AQPDALNVPSTCCFTFSSKK  | Negative |
| Q99935 | ALISCFTPSESQRFSRRPYL  | Negative |
| Q99935 | RFSRRPYLPGQLPPPPLYRP  | Negative |
| Q99935 | TPSESQRFSRRPYLPGQLPP  | Negative |
| Q99935 | MKLTFFLGLLALISCFTPSE  | Negative |
| Q99935 | SRRPYLPGQLPPPPLYRPRW  | Negative |
| Q99935 | RRPYLPGQLPPPPLYRPRWV  | Negative |
| Q99935 | TFFLGLLALISCFTPSESQR  | Negative |
| Q99935 | PSESQRFSRRPYLPGQLPPP  | Negative |
| Q99935 | SCFTPSESQRFSRRPYLPGQ  | Negative |
| Q99935 | FLGLLALISCFTPSESQRFS  | Negative |
| Q99935 | FSRRPYLPGQLPPPPLYRPR  | Negative |
| Q99935 | YLPQQLPPPPLYRPRWVPPS  | Negative |
| Q99935 | FFLGLLALISCFTPSESQRF  | Negative |
| Q99935 | QRFSRRPYLPGQLPPPPLYR  | Negative |
| Q99935 | ESQRFSRRPYLPGQLPPPPL  | Negative |
| Q99935 | KLTFFLGLLALISCFTPSES  | Negative |
| Q99935 | SESQRFSRRPYLPGQLPPPP  | Negative |
| Q99935 | RPYLPGQLPPPPLYRPRWVP  | Negative |
| Q99935 | SQRFSRRPYLPGQLPPPPLY  | Negative |
| Q99935 | LPGQLPPPPLYRPRWVPPSP  | Negative |
| Q99935 | FTPSESQRFSRRPYLPGQLP  | Negative |
| Q99935 | CFTPSESQRFSRRPYLPGQL  | Negative |
| Q99935 | LTFFLGLLALISCFTPSESQ  | Negative |
| Q99935 | LLALISCFTPSESQRFSRRP  | Negative |
| Q99935 | GLLALISCFTPSESQRFSRR  | Negative |
| Q99935 | ISCFTPSESQRFSRRPYLPG  | Negative |
| Q99935 | PYLPGQLPPPPLYRPRWVPP  | Negative |
| Q99935 | LALISCFTPSESQRFSRRPY  | Negative |
| Q99935 | LISCFTPSESQRFSRRPYLP  | Negative |
| Q99944 | LLLIPGEGAKGGSRESQG    | Negative |

|        |                      |          |
|--------|----------------------|----------|
| Q99944 | RAELCTLGGFSFLLLLIPG  | Negative |
| Q99944 | GGSLRESQGVCSKQTLVVPL | Negative |
| Q99944 | GSRAELCTLGGFSFLLLLI  | Negative |
| Q99944 | EGAKGGSRESQGVCSKQTL  | Negative |
| Q99944 | LCTLGGFSFLLLLIPGEGA  | Negative |
| Q99944 | MGSRAELCTLGGFSFLLLL  | Negative |
| Q99944 | PGEGAKGGSRESQGVCSKQ  | Negative |
| Q99944 | ELCTLGGFSFLLLLIPGEG  | Negative |
| Q99944 | FLLLLIPGEGAKGGSRESQ  | Negative |
| Q99944 | KGGSRESQGVCSKQTLVVP  | Negative |
| Q99944 | AELCTLGGFSFLLLLIPGE  | Negative |
| Q99944 | SFLLLLIPGEGAKGGSRES  | Negative |
| Q99944 | LLIPGEGAKGGSRESQGV   | Negative |
| Q99944 | SRAELCTLGGFSFLLLLIP  | Negative |
| Q99944 | SLRESQGVCSKQTLVVPLHY | Negative |
| Q99944 | LLGGFSFLLLLIPGEGAKGG | Negative |
| Q99944 | FSFLLLLIPGEGAKGGSRE  | Negative |
| Q99944 | AKGGSRESQGVCSKQTLVV  | Negative |
| Q99944 | CTLGGFSFLLLLIPGEGAK  | Negative |
| Q99944 | GFSFLLLLIPGEGAKGGSRL | Negative |
| Q99944 | GAKGGSRESQGVCSKQTLV  | Negative |
| Q99944 | GSLRESQGVCSKQTLVVPLH | Negative |
| Q99944 | LLIPGEGAKGGSRESQGV   | Negative |
| Q99944 | LIPGEGAKGGSRESQGVCS  | Negative |
| Q99944 | GEGAKGGSRESQGVCSKQT  | Negative |
| Q99944 | GGFSFLLLLIPGEGAKGGS  | Negative |
| Q99944 | TLLGGFSFLLLLIPGEGAKG | Negative |
| Q99944 | IPGEGAKGGSRESQGVCSK  | Negative |
| Q99969 | PLALWLGAVGVGVAELTEAQ | Negative |
| Q99969 | ALWLGAVGVGVAELTEAQR  | Negative |
| Q99969 | RRLIPLALWLGAVGVGVAE  | Negative |
| Q99969 | VGVAELTEAQRRLQVALEE  | Negative |
| Q99969 | WLGAVGVGVAELTEAQRRL  | Negative |
| Q99969 | VAELTEAQRRLQVALEEFH  | Negative |
| Q99969 | QRRLQVALEEFHKHPPVQW  | Negative |
| Q99969 | AELTEAQRRLQVALEEFHK  | Negative |
| Q99969 | AVGVGVAELTEAQRRLQVA  | Negative |
| Q99969 | GLQVALEEFHKHPPVQWAF  | Negative |
| Q99969 | RRGLQVALEEFHKHPPVQW  | Negative |
| Q99969 | RLLIPLALWLGAVGVGVAEL | Negative |
| Q99969 | LLIPLALWLGAVGVGVAELT | Negative |
| Q99969 | GAVGVGVAELTEAQRRLQV  | Negative |
| Q99969 | EAQRRLQVALEEFHKHPPV  | Negative |
| Q99969 | RGLQVALEEFHKHPPVQWAF | Negative |
| Q99969 | TEAQRRLQVALEEFHKHPP  | Negative |
| Q99969 | VGGVGVAELTEAQRRLQVAL | Negative |

|        |                        |          |
|--------|------------------------|----------|
| Q99969 | LQVALEEFHKHPPVQWAFQE   | Negative |
| Q99969 | ELTEAQRRGLQVALEEFHKH   | Negative |
| Q99969 | GVGV AELTEAQRRGLQVALE  | Negative |
| Q99969 | LALWLGA VGVGV AELTEAQR | Negative |
| Q99969 | LIPLALWLGA VGVGV AELTE | Negative |
| Q99969 | MRLLIPLALWLGA VGVGV A  | Negative |
| Q99969 | LGAVGVGV AELTEAQRRGLQ  | Negative |
| Q99969 | LTEAQRRGLQVALEEFHKHP   | Negative |
| Q99969 | LWLGA VGVGV AELTEAQRRG | Negative |
| Q99969 | GVAELTEAQRRGLQVALEEF   | Negative |
| Q99969 | AQRRGLQVALEEFHKHPPVQ   | Negative |
| Q99972 | LLACLVWDVGART AQLRKAN  | Negative |
| Q99972 | MPAVQLLLLACLVWDVGART   | Negative |
| Q99972 | WDVGART AQLRKANDQSGRC  | Negative |
| Q99972 | VGART AQLRKANDQSGRCQY  | Negative |
| Q99972 | LLLACLVWDVGART AQLRKA  | Negative |
| Q99972 | DVGART AQLRKANDQSGRCQ  | Negative |
| Q99972 | FFCARCCSFGPEMPAVQLLL   | Negative |
| Q99972 | FCARCCSFGPEMPAVQLLLL   | Negative |
| Q99972 | AVQLLLLACLVWDVGARTAQ   | Negative |
| Q99972 | VWDVGART AQLRKANDQSGR  | Negative |
| Q99972 | GPEMPAVQLLLLACLVWDVG   | Negative |
| Q99972 | PAVQLLLLACLVWDVGART A  | Negative |
| Q99972 | CLVWDVGART AQLRKANDQS  | Negative |
| Q99972 | LVWDVGART AQLRKANDQSG  | Negative |
| Q99972 | EMPAVQLLLLACLVWDVGAR   | Negative |
| Q99972 | RFFCARCCSFGPEMPAVQLL   | Negative |
| Q99972 | SFGPEMPAVQLLLLACLVWD   | Negative |
| Q99972 | MRFFCARCCSFGPEMPAVQL   | Negative |
| Q99972 | PEMPAVQLLLLACLVWDVGA   | Negative |
| Q99972 | LLLACLVWDVGART AQLRK   | Negative |
| Q99972 | CARCCSFGPEMPAVQLLLLA   | Negative |
| Q99972 | ARCCSFGPEMPAVQLLLAC    | Negative |
| Q99972 | CSFGPEMPAVQLLLLACLVW   | Negative |
| Q99972 | LACLVWDVGART AQLRKAND  | Negative |
| Q99972 | RCCSFGPEMPAVQLLLLACL   | Negative |
| Q99972 | ACLVWDVGART AQLRKANDQ  | Negative |
| Q99972 | CCSFGPEMPAVQLLLLACLV   | Negative |
| Q99972 | FGPEMPAVQLLLLACLVWDV   | Negative |
| Q99972 | QLLLLACLVWDVGART AQLR  | Negative |
| Q99MG7 | FLLLALALGVSCAHYQNLEV   | Negative |
| Q99MG7 | SPSEVDGKWYSLYIAADNKE   | Negative |
| Q99MG7 | ALALGVSCAHYQNLEVSPSE   | Negative |
| Q99MG7 | EVSPSEVDGKWYSLYIAADN   | Negative |
| Q99MG7 | SCAHYQNLEVSPSEVDGKWY   | Negative |
| Q99MG7 | PSEVDGKWYSLYIAADNKEK   | Negative |



|        |                      |          |
|--------|----------------------|----------|
| Q99MG7 | VDGKWYSLYIAADNKEKVSE | Negative |
| Q99MG7 | VSCAHYQNLEVSPSEVDGKW | Negative |
| Q99MG7 | LEVSPSEVDGKWYSLYIAAD | Negative |
| Q99MG7 | LLALALGVSCAHYQNLEVSP | Negative |
| Q99MG7 | DGKWYSLYIAADNKEKVSEG | Negative |
| Q99MG7 | LLLALALGVSCAHYQNLEVS | Negative |
| Q99MG7 | HYQNLEVSPSEVDGKWYSLY | Negative |
| Q99MG7 | KFLLALALGVSCAHYQNLE  | Negative |
| Q99MG7 | EVDGKWYSLYIAADNKEKVS | Negative |
| Q99MG7 | GKWYSLYIAADNKEKVSEGG | Negative |
| Q99MG7 | ALGVSCAHYQNLEVSPSEVD | Negative |
| Q99MG7 | LALALGVSCAHYQNLEVSPS | Negative |
| Q99MG7 | VSPSEVDGKWYSLYIAADNK | Negative |
| Q99MG7 | LGVSCAHYQNLEVSPSEVDG | Negative |
| Q99MG7 | NLEVSPSEVDGKWYSLYIAA | Negative |
| Q99MG7 | AHYQNLEVSPSEVDGKWYSL | Negative |
| Q99MG7 | LALGVSCAHYQNLEVSPSEV | Negative |
| Q99MG7 | YQNLEVSPSEVDGKWYSLYI | Negative |
| Q99MG7 | GVSCAHYQNLEVSPSEVDGK | Negative |
| Q99MG7 | QNLEVSPSEVDGKWYSLYIA | Negative |
| Q99MG7 | CAHYQNLEVSPSEVDGKWYS | Negative |
| Q99MG7 | SEVDGKWYSLYIAADNKEKV | Negative |
| Q99MG7 | MVKFLLALALGVSCAHYQN  | Negative |
| Q99ML8 | IPTFQLLPQNSLETTPSSVT | Negative |
| Q99ML8 | TFQLLPQNSLETTPSSVTSE | Negative |
| Q99ML8 | LFVPGTPIPTFQLLPQNSLE | Negative |
| Q99ML8 | ILFVPGTPIPTFQLLPQNSL | Negative |
| Q99ML8 | VPGTPIPTFQLLPQNSLETT | Negative |
| Q99ML8 | FQLLPQNSLETTPSSVTSES | Negative |
| Q99ML8 | PTFQLLPQNSLETTPSSVTS | Negative |
| Q99ML8 | VLMLDRILFVPGTPIPTFQL | Negative |
| Q99ML8 | QLLPQNSLETTPSSVTSESS | Negative |
| Q99ML8 | TPIPTFQLLPQNSLETTPSS | Negative |
| Q99ML8 | WALVVFVVLMLDRILFVPGT | Negative |
| Q99ML8 | PIPTFQLLPQNSLETTPSSV | Negative |
| Q99ML8 | ALVVFVVLMLDRILFVPGTP | Negative |
| Q99ML8 | RILFVPGTPIPTFQLLPQNS | Negative |
| Q99ML8 | LMLDRILFVPGTPIPTFQLL | Negative |
| Q99ML8 | RWALVVFVVLMLDRILFVPG | Negative |
| Q99ML8 | LDRILFVPGTPIPTFQLLPQ | Negative |
| Q99ML8 | VVFVVLMLDRILFVPGTPIP | Negative |
| Q99ML8 | LVVFVVLMLDRILFVPGTPI | Negative |
| Q99ML8 | MMTRWALVVFVVLMLDRILF | Negative |
| Q99ML8 | FVPGTPIPTFQLLPQNSLET | Negative |
| Q99ML8 | FVVLMLDRILFVPGTPIPTF | Negative |
| Q99ML8 | GTPIPTFQLLPQNSLETTPS | Negative |

|        |                        |          |
|--------|------------------------|----------|
| Q99ML8 | VVLMLDRILFVPGTPIPTFQ   | Negative |
| Q99ML8 | DRILFVPGTPIPTFQLLPQN   | Negative |
| Q99ML8 | PGTPIPTFQLLPQNSLETP    | Negative |
| Q99ML8 | MLDRILFVPGTPIPTFQLLP   | Negative |
| Q99ML8 | TRWALVVFVVLMLDRILFVP   | Negative |
| Q99ML8 | MTRWALVVFVVLMLDRILFV   | Negative |
| Q99PX1 | IYLTFFDDGPGINASIDVINVL | Negative |
| Q99PX1 | KLAIATLVSAALSQYAFAT    | Negative |
| Q99PX1 | AALSQYAFATDTKGTIYLT    | Negative |
| Q99PX1 | LVSAALSQYAFATDTKGTI    | Negative |
| Q99PX1 | KGTIYLTFFDDGPGINASIDVI | Negative |
| Q99PX1 | LNKLAIATLVSAALSQYAF    | Negative |
| Q99PX1 | TKGTIYLTFFDDGPGINASIDV | Negative |
| Q99PX1 | AFATDTKGTIYLTFFDDGPI   | Negative |
| Q99PX1 | LSQYAFATDTKGTIYLTFFD   | Negative |
| Q99PX1 | VSAALSQYAFATDTKGTIY    | Negative |
| Q99PX1 | QYAFATDTKGTIYLTFFDDG   | Negative |
| Q99PX1 | TLVSAALSQYAFATDTKGT    | Negative |
| Q99PX1 | ATLVSAALSQYAFATDTKG    | Negative |
| Q99PX1 | GTIYLTFFDDGPGINASIDVIN | Negative |
| Q99PX1 | DTKGTIYLTFFDDGPGINASID | Negative |
| Q99PX1 | NKLAIATLVSAALSQYAF     | Negative |
| Q99PX1 | AIATLVSAALSQYAFATDT    | Negative |
| Q99PX1 | QDTKGTIYLTFFDDGPGIN    | Negative |
| Q99PX1 | SQYAFATDTKGTIYLTFFD    | Negative |
| Q99PX1 | AQDTKGTIYLTFFDDGPGIN   | Negative |
| Q99PX1 | LAIATLVSAALSQYAFATD    | Negative |
| Q99PX1 | ALSQYAFATDTKGTIYLT     | Negative |
| Q99PX1 | TIYLTFFDDGPGINASIDVIN  | Negative |
| Q99PX1 | KLNLAIATLVSAALSQYAF    | Negative |
| Q99PX1 | MKLNLAIATLVSAALSQY     | Negative |
| Q99PX1 | FATDTKGTIYLTFFDDGPGIN  | Negative |
| Q99PX1 | SAALSQYAFATDTKGTIYLT   | Negative |
| Q99PX1 | DTKGTIYLTFFDDGPGIN     | Negative |
| Q99PX1 | YAFATDTKGTIYLTFFDDGP   | Negative |
| Q9AQS0 | LIAALLMTLWGGWQPDIAHA   | Negative |
| Q9AQS0 | IAALLMTLWGGWQPDIAHAS   | Negative |
| Q9AQS0 | DALRIKWATLLTGGPALDPA   | Negative |
| Q9AQS0 | GGWQPDIAHASDEFDALRIK   | Negative |
| Q9AQS0 | DEFDALRIKWATLLTGGPAL   | Negative |
| Q9AQS0 | PDIAHASDEFDALRIKWATL   | Negative |
| Q9AQS0 | ILIAALLMTLWGGWQPDIAH   | Negative |
| Q9AQS0 | WQPDIAHASDEFDALRIKWA   | Negative |
| Q9AQS0 | IAHASDEFDALRIKWATLLT   | Negative |
| Q9AQS0 | GILIAALLMTLWGGWQPDIA   | Negative |
| Q9AQS0 | AHASDEFDALRIKWATLLTG   | Negative |

|        |                      |          |
|--------|----------------------|----------|
| Q9AQS0 | EFDALRIKWATLLTGGPALD | Negative |
| Q9AQS0 | LSGILIAALLMTLWGGWQPD | Negative |
| Q9AQS0 | FDALRIKWATLLTGGPALDP | Negative |
| Q9AQS0 | SDEFDALRIKWATLLTGGPA | Negative |
| Q9AQS0 | QPDIAHASDEFDALRIKWAT | Negative |
| Q9AQS0 | HASDEFDALRIKWATLLTGG | Negative |
| Q9AQS0 | AALLMTLWGGWQPDIAHASD | Negative |
| Q9AQS0 | ALLMTLWGGWQPDIAHASDE | Negative |
| Q9AQS0 | DIAHASDEFDALRIKWATLL | Negative |
| Q9AQS0 | MLSGILIAALLMTLWGGWQP | Negative |
| Q9AQS0 | ASDEFDALRIKWATLLTGGP | Negative |
| Q9AQS0 | MTLWGGWQPDIAHASDEFDA | Negative |
| Q9AQS0 | GWQPDIAHASDEFDALRIKW | Negative |
| Q9AQS0 | WGGWQPDIAHASDEFDALRI | Negative |
| Q9AQS0 | LLMTLWGGWQPDIAHASDEF | Negative |
| Q9AQS0 | SGILIAALLMTLWGGWQPDI | Negative |
| Q9AQS0 | TLWGGWQPDIAHASDEFDAL | Negative |
| Q9AQS0 | LWGGWQPDIAHASDEFDALR | Negative |
| Q9BJX2 | TVNGTPFEVRCATDADCSRK | Negative |
| Q9BJX2 | NGTPFEVRCATDADCSRKCP | Negative |
| Q9BJX2 | IFFAILLILAVCSMAIWTVN | Negative |
| Q9BJX2 | TPFEVRCATDADCSRKCPGN | Negative |
| Q9BJX2 | CSMAIWTVNGTPFEVRCATD | Negative |
| Q9BJX2 | ILAVCSMAIWTVNGTPFEVR | Negative |
| Q9BJX2 | FFAILLILAVCSMAIWTVNG | Negative |
| Q9BJX2 | SMAIWTVNGTPFEVRCATDA | Negative |
| Q9BJX2 | WTVNGTPFEVRCATDADCSR | Negative |
| Q9BJX2 | ILLILAVCSMAIWTVNGTPF | Negative |
| Q9BJX2 | FEVRCATDADCSRKCPGNPP | Negative |
| Q9BJX2 | CATDADCSRKCPGNPPCRNG | Negative |
| Q9BJX2 | FAILLILAVCSMAIWTVNGT | Negative |
| Q9BJX2 | AVCSMAIWTVNGTPFEVRCA | Negative |
| Q9BJX2 | IWTVNGTPFEVRCATDADCS | Negative |
| Q9BJX2 | KIFFAILLILAVCSMAIWTV | Negative |
| Q9BJX2 | PFEVRCATDADCSRKCPGNP | Negative |
| Q9BJX2 | LLILAVCSMAIWTVNGTPFE | Negative |
| Q9BJX2 | MAIWTVNGTPFEVRCATDAD | Negative |
| Q9BJX2 | LAVCSMAIWTVNGTPFEVRC | Negative |
| Q9BJX2 | EVRCATDADCSRKCPGNPPC | Negative |
| Q9BJX2 | GTPFEVRCATDADCSRKCPG | Negative |
| Q9BJX2 | AIWTVNGTPFEVRCATDADC | Negative |
| Q9BJX2 | RCATDADCSRKCPGNPPCRN | Negative |
| Q9BJX2 | VNGTPFEVRCATDADCSRKC | Negative |
| Q9BJX2 | MKIFFAILLILAVCSMAIWT | Negative |
| Q9BJX2 | VRCATDADCSRKCPGNPPCR | Negative |
| Q9BJX2 | AILLILAVCSMAIWTVNGTP | Negative |

|        |                       |          |
|--------|-----------------------|----------|
| Q9BJX2 | VCSMAIWTVNGTPFEVRCAT  | Negative |
| Q9BKB7 | LTLFICSIGWSEARPTDIKC  | Negative |
| Q9BKB7 | FICSIGWSEARPTDIKCSSES | Negative |
| Q9BKB7 | CSESYQCFPVCKSRFGKTNG  | Negative |
| Q9BKB7 | FVLLLTLFICSIGWSEARPT  | Negative |
| Q9BKB7 | VLLLTLFICSIGWSEARPTD  | Negative |
| Q9BKB7 | MKISFVLLLTLFICSIGWSE  | Negative |
| Q9BKB7 | CSIGWSEARPTDIKCSESYQ  | Negative |
| Q9BKB7 | EARPTDIKCSESYQCFPVCK  | Negative |
| Q9BKB7 | SIGWSEARPTDIKCSESYQC  | Negative |
| Q9BKB7 | WSEARPTDIKCSESYQCFPV  | Negative |
| Q9BKB7 | IKCSESYQCFPVCKSRFGKT  | Negative |
| Q9BKB7 | ARPTDIKCSESYQCFPVCKS  | Negative |
| Q9BKB7 | IGWSEARPTDIKCSESYQCF  | Negative |
| Q9BKB7 | LLTLFICSIGWSEARPTDIK  | Negative |
| Q9BKB7 | KCSESYQCFPVCKSRFGKTN  | Negative |
| Q9BKB7 | SEARPTDIKCSESYQCFPVC  | Negative |
| Q9BKB7 | SESYQCFPVCKSRFGKTNGR  | Negative |
| Q9BKB7 | DIKCSESYQCFPVCKSRFGK  | Negative |
| Q9BKB7 | RPTDIKCSESYQCFPVCKSR  | Negative |
| Q9BKB7 | TLFICSIGWSEARPTDIKCS  | Negative |
| Q9BKB7 | ISFVLLLTLFICSIGWSEAR  | Negative |
| Q9BKB7 | SFVLLLTLFICSIGWSEARP  | Negative |
| Q9BKB7 | PTDIKCSESYQCFPVCKSRF  | Negative |
| Q9BKB7 | ICSIGWSEARPTDIKCSESY  | Negative |
| Q9BKB7 | ESYQCFPVCKSRFGKTNGRC  | Negative |
| Q9BKB7 | KISFVLLLTLFICSIGWSEA  | Negative |
| Q9BKB7 | LFICSIGWSEARPTDIKCSE  | Negative |
| Q9BKB7 | TDIKCSESYQCFPVCKSRFG  | Negative |
| Q9BKB7 | GWSEARPTDIKCSESYQCFP  | Negative |
| Q9BQB4 | LALCLVCLLVHTAFRVVEGQ  | Negative |
| Q9BQB4 | QGQWQAFKNDATEIIPELGEY | Negative |
| Q9BQB4 | GWQAFKNDATEIIPELGEYP  | Negative |
| Q9BQB4 | QLPLALCLVCLLVHTAFRVV  | Negative |
| Q9BQB4 | CLLVHTAFRVVEGQGQWQAFK | Negative |
| Q9BQB4 | LCLVCLLVHTAFRVVEGQGQW | Negative |
| Q9BQB4 | LLVHTAFRVVEGQGQWQAFKN | Negative |
| Q9BQB4 | EGQGQWQAFKNDATEIIPELG | Negative |
| Q9BQB4 | WQAFKNDATEIIPELGEYPE  | Negative |
| Q9BQB4 | VEGQGQWQAFKNDATEIIPEL | Negative |
| Q9BQB4 | KNDATEIIPELGEYPEPPPE  | Negative |
| Q9BQB4 | FKNDATEIIPELGEYPEPPP  | Negative |
| Q9BQB4 | AFRVVEGQGQWQAFKNDATEI | Negative |
| Q9BQB4 | LPLALCLVCLLVHTAFRVVE  | Negative |
| Q9BQB4 | LVHTAFRVVEGQGQWQAFKND | Negative |
| Q9BQB4 | TAFRVVEGQGQWQAFKNDATE | Negative |

|        |                      |          |
|--------|----------------------|----------|
| Q9BQB4 | VHTAFRVVEGQGWQAFKND  | Negative |
| Q9BQB4 | ALCLVCLLVHTAFRVVEGQG | Negative |
| Q9BQB4 | PLALCLVCLLVHTAFRVVEG | Negative |
| Q9BQB4 | RVVEGQGWQAFKNDATEIIP | Negative |
| Q9BQB4 | GQGWQAFKNDATEIIPELGE | Negative |
| Q9BQB4 | QAFKNDATEIIPELGEYPEP | Negative |
| Q9BQB4 | FRVVEGQGWQAFKNDATEII | Negative |
| Q9BQB4 | CLVCLLVHTAFRVVEGQGWQ | Negative |
| Q9BQB4 | AFKNDATEIIPELGEYPEPP | Negative |
| Q9BQB4 | VCLLVHTAFRVVEGQGWQAF | Negative |
| Q9BQB4 | MQLPLALCLVCLLVHTAFRV | Negative |
| Q9BQB4 | VVEGQGWQAFKNDATEIIP  | Negative |
| Q9BQB4 | HTAFRVVEGQGWQAFKNDAT | Negative |
| Q9BX93 | LAQSDTSPDTEESYSDWGLR | Negative |
| Q9BX93 | GGLAQSDTSPDTEESYSDWG | Negative |
| Q9BX93 | DTEESYSDWGLRHLRGSFES | Negative |
| Q9BX93 | LSLGGGLAQSDTSPDTEESY | Negative |
| Q9BX93 | DTSPDTEESYSDWGLRHLRG | Negative |
| Q9BX93 | MKLASGFLVLWLSLGGGLAQ | Negative |
| Q9BX93 | ASGFLVLWLSLGGGLAQSDT | Negative |
| Q9BX93 | GGGLAQSDTSPDTEESYSDW | Negative |
| Q9BX93 | TSPDTEESYSDWGLRHLRGS | Negative |
| Q9BX93 | QSDTSPDTEESYSDWGLRHL | Negative |
| Q9BX93 | LASGFLVLWLSLGGGLAQSD | Negative |
| Q9BX93 | SLGGGLAQSDTSPDTEESYS | Negative |
| Q9BX93 | ESYSDWGLRHLRGSFESVNS | Negative |
| Q9BX93 | SPDTEESYSDWGLRHLRGSF | Negative |
| Q9BX93 | KLASGFLVLWLSLGGGLAQ  | Negative |
| Q9BX93 | LVLWLSLGGGLAQSDTSPDT | Negative |
| Q9BX93 | PDTEESYSDWGLRHLRGSFE | Negative |
| Q9BX93 | LWLSLGGGLAQSDTSPDTEE | Negative |
| Q9BX93 | WLSLGGGLAQSDTSPDTEES | Negative |
| Q9BX93 | AQSDTSPDTEESYSDWGLRH | Negative |
| Q9BX93 | SDTSPDTEESYSDWGLRHLR | Negative |
| Q9BX93 | EESYSDWGLRHLRGSFESVN | Negative |
| Q9BX93 | VLWLSLGGGLAQSDTSPDTE | Negative |
| Q9BX93 | GFLVLWLSLGGGLAQSDTSP | Negative |
| Q9BX93 | FLVLWLSLGGGLAQSDTSPD | Negative |
| Q9BX93 | TEESYSDWGLRHLRGSFESV | Negative |
| Q9BX93 | GLAQSDTSPDTEESYSDWGL | Negative |
| Q9BX93 | LGGGLAQSDTSPDTEESYSD | Negative |
| Q9BX93 | SYSDWGLRHLRGSFESVNSY | Negative |
| Q9BXI9 | IPMVELTFDRAVASGCQRCC | Negative |
| Q9BXI9 | PVWAALLFLLMCEIPMVEL  | Negative |
| Q9BXI9 | VELTFDRAVASGCQRCCDSE | Negative |
| Q9BXI9 | FLLMCEIPMVELTFDRAVAS | Negative |

|        |                       |          |
|--------|-----------------------|----------|
| Q9BXI9 | FDRAVASGCQRCCDSEDPLD  | Negative |
| Q9BXI9 | LGPVWAALLLFLLMCEIPMV  | Negative |
| Q9BXI9 | MCEIPMVELTFDRAVASGCQ  | Negative |
| Q9BXI9 | WAALLLFLLMCEIPMVELTF  | Negative |
| Q9BXI9 | EIPMVELTFDRAVASGCQRC  | Negative |
| Q9BXI9 | TFDRAVASGCQRCCDSEDPL  | Negative |
| Q9BXI9 | LTFDRAVASGCQRCCDSEDP  | Negative |
| Q9BXI9 | PMVELTFDRAVASGCQRCCD  | Negative |
| Q9BXI9 | TAALGPVWAALLLFLLMCEI  | Negative |
| Q9BXI9 | MGTAALGPVWAALLLFLLMC  | Negative |
| Q9BXI9 | LLFLLMCEIPMVELTFDRAV  | Negative |
| Q9BXI9 | AALLLFLLMCEIPMVELTFD  | Negative |
| Q9BXI9 | MVELTFDRAVASGCQRCCDS  | Negative |
| Q9BXI9 | AALGPVWAALLLFLLMCEIP  | Negative |
| Q9BXI9 | CEIPMVELTFDRAVASGCQR  | Negative |
| Q9BXI9 | LFLLMCEIPMVELTFDRAVA  | Negative |
| Q9BXI9 | GPVWAALLLFLLMCEIPMVE  | Negative |
| Q9BXI9 | LLMCEIPMVELTFDRAVASG  | Negative |
| Q9BXI9 | GTAALGPVWAALLLFLLMCE  | Negative |
| Q9BXI9 | ALLLFLLMCEIPMVELTFDR  | Negative |
| Q9BXI9 | DRAVASGCQRCCDSEDPLDP  | Negative |
| Q9BXI9 | VWAALLLFLLMCEIPMVELT  | Negative |
| Q9BXI9 | ALGPVWAALLLFLLMCEIPM  | Negative |
| Q9BXI9 | LMCEIPMVELTFDRAVASGC  | Negative |
| Q9BXI9 | ELTFDRAVASGCQRCCDSED  | Negative |
| Q9BXJ3 | PGSSELRSAFSAARTTPLEG  | Negative |
| Q9BXJ3 | LGLLGPAACWALGPTPGPGS  | Negative |
| Q9BXJ3 | GPGSSELRSAFSAARTTPLE  | Negative |
| Q9BXJ3 | LRSAFSAARTTPLEGTSEMA  | Negative |
| Q9BXJ3 | LGPAACWALGPTPGPGSSEL  | Negative |
| Q9BXJ3 | GPAACWALGPTPGPGSSELR  | Negative |
| Q9BXJ3 | PTPGPGSSELRSAFSAARTT  | Negative |
| Q9BXJ3 | LLGLLGPAACWALGPTPGPG  | Negative |
| Q9BXJ3 | GSSELRSAFSAARTTPLEGT  | Negative |
| Q9BXJ3 | PLLLGLLGPAACWALGPTPG  | Negative |
| Q9BXJ3 | ALGPTPGPGSSELRSAFSAA  | Negative |
| Q9BXJ3 | ELRSAFSAARTTPLEGTSEM  | Negative |
| Q9BXJ3 | LLLGLLGPAACWALGPTPGP  | Negative |
| Q9BXJ3 | AACWALGPTPGPGSSELRSA  | Negative |
| Q9BXJ3 | GLLGPAACWALGPTPGPGSS  | Negative |
| Q9BXJ3 | RSASFSAARTTPLEGTSEMAV | Negative |
| Q9BXJ3 | WALGPTPGPGSSELRSAFSA  | Negative |
| Q9BXJ3 | SELRSAFSAARTTPLEGTSE  | Negative |
| Q9BXJ3 | TPGPGSSELRSAFSAARTTP  | Negative |
| Q9BXJ3 | ACWALGPTPGPGSSELRSAF  | Negative |
| Q9BXJ3 | LLGPAACWALGPTPGPGSSE  | Negative |

|        |                      |          |
|--------|----------------------|----------|
| Q9BXJ3 | PAACWALGPTPGPGSSELRS | Negative |
| Q9BXJ3 | PGPGSSELRSAFSAARTTPL | Negative |
| Q9BXJ3 | LGPTPGPGSSELRSAFSAAR | Negative |
| Q9BXJ3 | GPTPGPGSSELRSAFSAART | Negative |
| Q9BXJ3 | SAFSAARTTPLEGTSEMAVT | Negative |
| Q9BXJ3 | MLPLLLGLLGPAACWALGPT | Negative |
| Q9BXJ3 | SSELRSAFSAARTTPLEGTS | Negative |
| Q9BXJ3 | CWALGPTPGPGSSELRSAFS | Negative |
| Q9BYZ8 | IIMRPSCAPGWFYHKSNCYG | Negative |
| Q9BYZ8 | LLLLSCLAKTGVLGDIIMRP | Negative |
| Q9BYZ8 | LGDIIMRPSCAPGWFYHKS  | Negative |
| Q9BYZ8 | LAKTGVLGDIIMRPSCAPGW | Negative |
| Q9BYZ8 | VLGDIIMRPSCAPGWFYHKS | Negative |
| Q9BYZ8 | SRSMLLLLLSCLAKTGVLG  | Negative |
| Q9BYZ8 | DIIMRPSCAPGWFYHKSNCY | Negative |
| Q9BYZ8 | MRLLLLLSCLAKTGVLGDII | Negative |
| Q9BYZ8 | TGVLGDIIMRPSCAPGWFYH | Negative |
| Q9BYZ8 | GVLGDIIMRPSCAPGWFYHK | Negative |
| Q9BYZ8 | MRPSCAPGWFYHKSNCYGYF | Negative |
| Q9BYZ8 | ASRSMRLLLLLSCLAKTGVL | Negative |
| Q9BYZ8 | AKTGVLGDIIMRPSCAPGWF | Negative |
| Q9BYZ8 | PSCAPGWFYHKSNCYGYFRK | Negative |
| Q9BYZ8 | RPSCAPGWFYHKSNCYGYFR | Negative |
| Q9BYZ8 | RLLLLSCLAKTGVLGDII   | Negative |
| Q9BYZ8 | CLAKTGVLGDIIMRPSCAPG | Negative |
| Q9BYZ8 | GDIIMRPSCAPGWFYHKSNC | Negative |
| Q9BYZ8 | SCLAKTGVLGDIIMRPSCAP | Negative |
| Q9BYZ8 | SCAPGWFYHKSNCYGYFRKL | Negative |
| Q9BYZ8 | LLSCLAKTGVLGDIIMRPSC | Negative |
| Q9BYZ8 | IMRPSCAPGWFYHKSNCYGY | Negative |
| Q9BYZ8 | KTGVLGDIIMRPSCAPGWFY | Negative |
| Q9BYZ8 | LSCLAKTGVLGDIIMRPSCA | Negative |
| Q9BYZ8 | CAPGWFYHKSNCYGYFRKLR | Negative |
| Q9BYZ8 | SMRLLLLLSCLAKTGVLGDI | Negative |
| Q9BYZ8 | RSMRLLLLLSCLAKTGVLGD | Negative |
| Q9BYZ8 | LLSCLAKTGVLGDIIMRPS  | Negative |
| Q9BYZ8 | MASRSMRLLLLLSCLAKTGV | Negative |
| Q9BZM5 | AAAATKILLCLPLLLLLSGW | Negative |
| Q9BZM5 | DPHSLCYDITVIPKFRPGPR | Negative |
| Q9BZM5 | AAATKILLCLPLLLLLSGWS | Negative |
| Q9BZM5 | KILLCLPLLLLLSGWSRAGR | Negative |
| Q9BZM5 | RAGRADPHSLCYDITVIPKF | Negative |
| Q9BZM5 | AATKILLCLPLLLLLSGWSR | Negative |
| Q9BZM5 | LLLLSGWSRAGRADPHSLCY | Negative |
| Q9BZM5 | ILLCLPLLLLLSGWSRAGRA | Negative |
| Q9BZM5 | AGRADPHSLCYDITVIPKFR | Negative |

|        |                       |          |
|--------|-----------------------|----------|
| Q9BZM5 | PHSLCYDITVIPKFRPGPRW  | Negative |
| Q9BZM5 | SRAGRADPHSLCYDITVIPK  | Negative |
| Q9BZM5 | LPLLLLLSGWSRAGRADPHS  | Negative |
| Q9BZM5 | LSGWSRAGRADPHSLCYDIT  | Negative |
| Q9BZM5 | PLLLLLSGWSRAGRADPHSL  | Negative |
| Q9BZM5 | ATKILLCLPLLLLLSGWSRA  | Negative |
| Q9BZM5 | MAAAAATKILLCLPLLLLLS  | Negative |
| Q9BZM5 | TKILLCLPLLLLLSGWSRAG  | Negative |
| Q9BZM5 | CLPLLLLLSGWSRAGRADPH  | Negative |
| Q9BZM5 | LLCLPLLLLLSGWSRAGRAD  | Negative |
| Q9BZM5 | LLSGWSRAGRADPHSLCYD   | Negative |
| Q9BZM5 | SGWSRAGRADPHSLCYDITV  | Negative |
| Q9BZM5 | GRADPHSLCYDITVIPKFRP  | Negative |
| Q9BZM5 | WSRAGRADPHSLCYDITVIP  | Negative |
| Q9BZM5 | ADPHSLCYDITVIPKFRPGP  | Negative |
| Q9BZM5 | LLSGWSRAGRADPHSLCYDI  | Negative |
| Q9BZM5 | RADPHSLCYDITVIPKFRPG  | Negative |
| Q9BZM5 | LLLLSGWSRAGRADPHSLC   | Negative |
| Q9BZM5 | GWSRAGRADPHSLCYDITVI  | Negative |
| Q9BZM5 | AAAAATKILLCLPLLLLLSG  | Negative |
| Q9BZR6 | QAWQVAAPCPGACVCYNEPK  | Negative |
| Q9BZR6 | ASAGGSRL LAWVLWLQAWQV | Negative |
| Q9BZR6 | CPGACVCYNEPKVTTSCPQQ  | Negative |
| Q9BZR6 | WLQAWQVAAPCPGACVCYNE  | Negative |
| Q9BZR6 | ACVCYNEPKVTTSCPQQGLQ  | Negative |
| Q9BZR6 | VAAPCPGACVCYNEPKVTT   | Negative |
| Q9BZR6 | RASAGGSRL LAWVLWLQAWQ | Negative |
| Q9BZR6 | GSRL LAWVLWLQAWQVAAP  | Negative |
| Q9BZR6 | MKRASAGGSRL LAWVLWLQA | Negative |
| Q9BZR6 | AGGSRL LAWVLWLQAWQVAA | Negative |
| Q9BZR6 | SAGGSRL LAWVLWLQAWQVA | Negative |
| Q9BZR6 | AWVLWLQAWQVAAPCPGACV  | Negative |
| Q9BZR6 | RLLAWVLWLQAWQVAAPCPG  | Negative |
| Q9BZR6 | GACVCYNEPKVTTSCPQQGL  | Negative |
| Q9BZR6 | APCPGACVCYNEPKVTTSCP  | Negative |
| Q9BZR6 | AAPCPGACVCYNEPKVTTSC  | Negative |
| Q9BZR6 | LLAWVLWLQAWQVAAPCPGA  | Negative |
| Q9BZR6 | WVLWLQAWQVAAPCPGACVC  | Negative |
| Q9BZR6 | PGACVCYNEPKVTTSCPQQG  | Negative |
| Q9BZR6 | AWQVAAPCPGACVCYNEPKV  | Negative |
| Q9BZR6 | KRASAGGSRL LAWVLWLQAW | Negative |
| Q9BZR6 | QVAAPCPGACVCYNEPKVTT  | Negative |
| Q9BZR6 | PCPGACVCYNEPKVTTSCPQ  | Negative |
| Q9BZR6 | GSRL LAWVLWLQAWQVAAPC | Negative |
| Q9BZR6 | LQAWQVAAPCPGACVCYNEP  | Negative |
| Q9BZR6 | WQVAAPCPGACVCYNEPKVT  | Negative |



|        |                      |          |
|--------|----------------------|----------|
| Q9BZR6 | VLWLQAWQVAAPCPGACVCY | Negative |
| Q9BZR6 | SRLLAWVLWLQAWQVAAPCP | Negative |
| Q9BZR6 | LWLQAWQVAAPCPGACVCYN | Negative |
| Q9C0Y4 | MMISTAYQSLFLTALFSAIS | Negative |
| Q9C0Y4 | AISIAVGNVYQTLNVIGDRN | Negative |
| Q9C0Y4 | TAYQSLFLTALFSAISIAVG | Negative |
| Q9C0Y4 | TALFSAISIAVGNVYQTLNV | Negative |
| Q9C0Y4 | VYQTLNVIGDRNVTIPTNGI | Negative |
| Q9C0Y4 | AVGNVYQTLNVIGDRNVTIP | Negative |
| Q9C0Y4 | ISIAVGNVYQTLNVIGDRNV | Negative |
| Q9C0Y4 | LFSAISIAVGNVYQTLNVIG | Negative |
| Q9C0Y4 | LVIGDRNVTIPTNGIPQRL  | Negative |
| Q9C0Y4 | GNVYQTLNVIGDRNVTIPTN | Negative |
| Q9C0Y4 | SAISIAVGNVYQTLNVIGDR | Negative |
| Q9C0Y4 | IAVGNVYQTLNVIGDRNVTI | Negative |
| Q9C0Y4 | SIAVGNVYQTLNVIGDRNVT | Negative |
| Q9C0Y4 | YQSLFLTALFSAISIAVGNV | Negative |
| Q9C0Y4 | QSLFLTALFSAISIAVGNVY | Negative |
| Q9C0Y4 | YQTLNVIGDRNVTIPTNGIP | Negative |
| Q9C0Y4 | VGNVYQTLNVIGDRNVTIPT | Negative |
| Q9C0Y4 | AYQSLFLTALFSAISIAVGN | Negative |
| Q9C0Y4 | MISTAYQSLFLTALFSAISI | Negative |
| Q9C0Y4 | TLNVIGDRNVTIPTNGIPQR | Negative |
| Q9C0Y4 | LTALFSAISIAVGNVYQTLN | Negative |
| Q9C0Y4 | NVYQTLNVIGDRNVTIPTNG | Negative |
| Q9C0Y4 | FLTALFSAISIAVGNVYQTL | Negative |
| Q9C0Y4 | QTLNVIGDRNVTIPTNGIPQ | Negative |
| Q9C0Y4 | FSAISIAVGNVYQTLNVIGD | Negative |
| Q9C0Y4 | STAYQSLFLTALFSAISIAV | Negative |
| Q9C0Y4 | ALFSAISIAVGNVYQTLNVI | Negative |
| Q9C0Y4 | ISTAYQSLFLTALFSAISIA | Negative |
| Q9C0Y4 | SLFLTALFSAISIAVGNVYQ | Negative |
| Q9C5S0 | AGVTGQAPTSPTATPAPPT  | Negative |
| Q9C5S0 | RSFAIAVICIVLIAGVTGQA | Negative |
| Q9C5S0 | QAPTSPTATPAPPTPTTPP  | Negative |
| Q9C5S0 | LIAGVTGQAPTSPTATPAP  | Negative |
| Q9C5S0 | GVTGQAPTSPTATPAPPTP  | Negative |
| Q9C5S0 | SFAIAVICIVLIAGVTGQAP | Negative |
| Q9C5S0 | VTGQAPTSPTATPAPPTPT  | Negative |
| Q9C5S0 | SPPTATPAPPTPTTPPPAAT | Negative |
| Q9C5S0 | APTSPTATPAPPTPTTPPP  | Negative |
| Q9C5S0 | TATPAPPTPTTPPPAATPPP | Negative |
| Q9C5S0 | TSPPTATPAPPTPTTPPPAA | Negative |
| Q9C5S0 | ICIVLIAGVTGQAPTSPTA  | Negative |
| Q9C5S0 | VICIVLIAGVTGQAPTSPT  | Negative |
| Q9C5S0 | FAIAVICIVLIAGVTGQAPT | Negative |

|        |                      |          |
|--------|----------------------|----------|
| Q9C5S0 | GQAPTSPPTATPAPPTPTTP | Negative |
| Q9C5S0 | PTATPAPPTPTTPPPAATPP | Negative |
| Q9C5S0 | IAVICIVLIAGVTGQAPTSP | Negative |
| Q9C5S0 | TPAPPTPTTPPPAATPPPVS | Negative |
| Q9C5S0 | ARSFAIAVICIVLIAGVTGQ | Negative |
| Q9C5S0 | VLIAGVTGQAPTSPPTATPA | Negative |
| Q9C5S0 | CIVLIAGVTGQAPTSPPTAT | Negative |
| Q9C5S0 | MARSFAIAVICIVLIAGVTG | Negative |
| Q9C5S0 | PPTATPAPPTPTTPPPAATP | Negative |
| Q9C5S0 | IVLIAGVTGQAPTSPPTATP | Negative |
| Q9C5S0 | AVICIVLIAGVTGQAPTSPP | Negative |
| Q9C5S0 | TGQAPTSPPTATPAPPTPTT | Negative |
| Q9C5S0 | PTSPPTATPAPPTPTTPPPA | Negative |
| Q9C5S0 | ATPAPPTPTTPPPAATPPPV | Negative |
| Q9C5S0 | IAGVTGQAPTSPPTATPAPP | Negative |
| Q9C9H5 | NPNYKEALSKSLLFFQGQRS | Negative |
| Q9C9H5 | EALSKSLLFFQGQRSGPLPR | Negative |
| Q9C9H5 | LLFSSLLISNGDANPNYKEA | Negative |
| Q9C9H5 | TSLFFVLLFSSLLISNGDA  | Negative |
| Q9C9H5 | KEALSKSLLFFQGQRSGPLP | Negative |
| Q9C9H5 | NYKEALSKSLLFFQGQRSGP | Negative |
| Q9C9H5 | FFVLLFSSLLISNGDANPNY | Negative |
| Q9C9H5 | ANPNYKEALSKSLLFFQGQR | Negative |
| Q9C9H5 | YKEALSKSLLFFQGQRSGPL | Negative |
| Q9C9H5 | ISNGDANPNYKEALSKSLLF | Negative |
| Q9C9H5 | ALSKSLLFFQGQRSGPLPRG | Negative |
| Q9C9H5 | DANPNYKEALSKSLLFFQGQ | Negative |
| Q9C9H5 | LLISNGDANPNYKEALSKSL | Negative |
| Q9C9H5 | SKSLLFFQGQRSGPLPRGQQ | Negative |
| Q9C9H5 | SLLISNGDANPNYKEALSK  | Negative |
| Q9C9H5 | NGDANPNYKEALSKSLLFFQ | Negative |
| Q9C9H5 | PNYKEALSKSLLFFQGQRSG | Negative |
| Q9C9H5 | MTSLFFFVLLFSSLLISNGD | Negative |
| Q9C9H5 | LFSSLLISNGDANPNYKEAL | Negative |
| Q9C9H5 | SLFFFVLLFSSLLISNGDAN | Negative |
| Q9C9H5 | LSKSLLFFQGQRSGPLPRGQ | Negative |
| Q9C9H5 | FFFVLLFSSLLISNGDANPN | Negative |
| Q9C9H5 | FSSLLISNGDANPNYKEALS | Negative |
| Q9C9H5 | GDANPNYKEALSKSLLFFQG | Negative |
| Q9C9H5 | SNGDANPNYKEALSKSLLFF | Negative |
| Q9C9H5 | SLLISNGDANPNYKEALSKS | Negative |
| Q9C9H5 | VLLFSSLLISNGDANPNYKE | Negative |
| Q9C9H5 | LISNGDANPNYKEALSKSLL | Negative |
| Q9C9H5 | LFFFVLLFSSLLISNGDANP | Negative |
| Q9D3H2 | ALTFLAHAAMEGPWKTVAI  | Negative |
| Q9D3H2 | AADRVDKIERGGELRIYCRS | Negative |

|        |                      |          |
|--------|----------------------|----------|
| Q9D3H2 | FGLAHAAMEGPWKTVIAAAD | Negative |
| Q9D3H2 | AMEGPWKTVIAADRVDKIE  | Negative |
| Q9D3H2 | IAADRVDKIERGGELRIYCR | Negative |
| Q9D3H2 | PWKTVIAADRVDKIERGGE  | Negative |
| Q9D3H2 | AHAAMEGPWKTVIAADRVD  | Negative |
| Q9D3H2 | MEGPWKTVIAADRVDKIER  | Negative |
| Q9D3H2 | TVAIAADRVDKIERGGELRI | Negative |
| Q9D3H2 | AIAADRVDKIERGGELRIYC | Negative |
| Q9D3H2 | DRVDKIERGGELRIYCRSLT | Negative |
| Q9D3H2 | AAMEGPWKTVIAADRVDKI  | Negative |
| Q9D3H2 | VAIAADRVDKIERGGELRIY | Negative |
| Q9D3H2 | HAAMEGPWKTVIAADRVDK  | Negative |
| Q9D3H2 | GLAHAAMEGPWKTVIAADR  | Negative |
| Q9D3H2 | KTVAIAADRVDKIERGGELR | Negative |
| Q9D3H2 | LALTFGLAHAAMEGPWKTV  | Negative |
| Q9D3H2 | WKTVAIAADRVDKIERGGEL | Negative |
| Q9D3H2 | ADRVDKIERGGELRIYCRSL | Negative |
| Q9D3H2 | LLLALTFGLAHAAMEGPWKT | Negative |
| Q9D3H2 | LAHAAMEGPWKTVIAADR   | Negative |
| Q9D3H2 | TFGLAHAAMEGPWKTVIAA  | Negative |
| Q9D3H2 | MAKFLLLALTFGLAHAAMEG | Negative |
| Q9D3H2 | KFLLLALTFGLAHAAMEGPW | Negative |
| Q9D3H2 | EGPWKTVAIAADRVDKIERG | Negative |
| Q9D3H2 | LLALTFGLAHAAMEGPWKTV | Negative |
| Q9D3H2 | LTFGLAHAAMEGPWKTVIA  | Negative |
| Q9D3H2 | GPWKTVIAADRVDKIERGG  | Negative |
| Q9D3H2 | FLLLALTFGLAHAAMEGPWK | Negative |
| Q9DEA1 | IFVSFGLLVVFLSLSGTGAD | Negative |
| Q9DEA1 | FIFVSFGLLVVFLSLSGTGA | Negative |
| Q9DEA1 | GTGADCPPDWSSYEGNCYL  | Negative |
| Q9DEA1 | RFIFVSFGLLVVFLSLSGTG | Negative |
| Q9DEA1 | SFGLLVVFLSLSGTGADCPP | Negative |
| Q9DEA1 | LSLSGTGADCPPDWSSYEGN | Negative |
| Q9DEA1 | VSFGLLVVFLSLSGTGADCP | Negative |
| Q9DEA1 | MGRFIFVSFGLLVVFLSLSG | Negative |
| Q9DEA1 | DCPPDWSSYEGNCYLVVKEK | Negative |
| Q9DEA1 | FLSLSGTGADCPPDWSSYEG | Negative |
| Q9DEA1 | LLVVFLSLSGTGADCPPDWS | Negative |
| Q9DEA1 | GRFIFVSFGLLVVFLSLSGT | Negative |
| Q9DEA1 | DWSSYEGNCYLVVKEKKTWA | Negative |
| Q9DEA1 | LSGTGADCPPDWSSYEGNCY | Negative |
| Q9DEA1 | SLSGTGADCPPDWSSYEGNC | Negative |
| Q9DEA1 | VFLSLSGTGADCPPDWSSYE | Negative |
| Q9DEA1 | SSYEGNCYLVVKEKKTWAEA | Negative |
| Q9DEA1 | LVVFLSLSGTGADCPPDWSS | Negative |
| Q9DEA1 | CPPDWSSYEGNCYLVVKEKK | Negative |

|        |                       |          |
|--------|-----------------------|----------|
| Q9DEA1 | PPDWSSYEGNCYLVVKEKKT  | Negative |
| Q9DEA1 | GADCPPDWSSYEGNCYL VVK | Negative |
| Q9DEA1 | SGTGADCPPDWSSYEGNCYL  | Negative |
| Q9DEA1 | FVSFGLLVVFLSLSGTGADC  | Negative |
| Q9DEA1 | PDWSSYEGNCYL VVKEKKTW | Negative |
| Q9DEA1 | VVFLSLSGTGADCPPDWSSY  | Negative |
| Q9DEA1 | TGADCPPDWSSYEGNCYL VV | Negative |
| Q9DEA1 | WSSYEGNCYL VVKEKKTWAE | Negative |
| Q9DEA1 | ADCPPDWSSYEGNCYL VVKE | Negative |
| Q9DEA1 | GLLVVFLSLSGTGADCPPDW  | Negative |
| Q9DEA2 | LPGWSSYIRFCYQPFKLLKT  | Negative |
| Q9DEA2 | IFVSFGLLVVFLSLSGTAAD  | Negative |
| Q9DEA2 | SGTAADCLPGWSSYIRFCYQ  | Negative |
| Q9DEA2 | FIFVSFGLLVVFLSLSGTAA  | Negative |
| Q9DEA2 | VVFLSLSGTAADCLPGWSSY  | Negative |
| Q9DEA2 | TAADCLPGWSSYIRFCYQPF  | Negative |
| Q9DEA2 | RFIFVSFGLLVVFLSLSGTA  | Negative |
| Q9DEA2 | SSYIRFCYQPFKLLKTWEDA  | Negative |
| Q9DEA2 | GRFIFVSFGLLVVFLSLSGT  | Negative |
| Q9DEA2 | GTAADCLPGWSSYIRFCYQP  | Negative |
| Q9DEA2 | LSGTAADCLPGWSSYIRFCY  | Negative |
| Q9DEA2 | DCLPGWSSYIRFCYQPFKLL  | Negative |
| Q9DEA2 | GWSSYIRFCYQPFKLLKTWE  | Negative |
| Q9DEA2 | VFLSLSGTAADCLPGWSSYI  | Negative |
| Q9DEA2 | FLSLSGTAADCLPGWSSYIR  | Negative |
| Q9DEA2 | ADCLPGWSSYIRFCYQPFKL  | Negative |
| Q9DEA2 | LLVVFLSLSGTAADCLPGWS  | Negative |
| Q9DEA2 | WSSYIRFCYQPFKLLKTWED  | Negative |
| Q9DEA2 | LVVFLSLSGTAADCLPGWSS  | Negative |
| Q9DEA2 | SLSGTAADCLPGWSSYIRFC  | Negative |
| Q9DEA2 | PGWSSYIRFCYQPFKLLKTW  | Negative |
| Q9DEA2 | MGRFIFVSFGLLVVFLSLSG  | Negative |
| Q9DEA2 | CLPGWSSYIRFCYQPFKLLK  | Negative |
| Q9DEA2 | AADCLPGWSSYIRFCYQPFK  | Negative |
| Q9DEA2 | SFGLLVVFLSLSGTAADCLP  | Negative |
| Q9DEA2 | LSLSGTAADCLPGWSSYIRF  | Negative |
| Q9DEA2 | VSFGLLVVFLSLSGTAADCL  | Negative |
| Q9DEA2 | GLLVVFLSLSGTAADCLPGW  | Negative |
| Q9DEA2 | FVSFGLLVVFLSLSGTAADC  | Negative |
| Q9EQX0 | PEHQKAQQRKESKKPPAKLQ  | Negative |
| Q9EQX0 | AGSSFLSPEHQKAQQRKESK  | Negative |
| Q9EQX0 | FLSPEHQKAQQRKESKKPPA  | Negative |
| Q9EQX0 | MAMAGSSFLSPEHQKAQQRK  | Negative |
| Q9EQX0 | TICSLLLLSMLWMDMAMAGS  | Negative |
| Q9EQX0 | LSSGTICSLLLLSMLWMDMA  | Negative |
| Q9EQX0 | SSGTICSLLLLSMLWMDMAM  | Negative |

|        |                       |          |
|--------|-----------------------|----------|
| Q9EQX0 | CSLLLLSMLWMDMAMAGSSF  | Negative |
| Q9EQX0 | MDMAMAGSSFLSPEHQKAQQ  | Negative |
| Q9EQX0 | SFLSPEHQKAQQRKESKKPP  | Negative |
| Q9EQX0 | ICLLLLSMLWMDMAMAGSS   | Negative |
| Q9EQX0 | MLSSGTICSLLLLLSMLWMDM | Negative |
| Q9EQX0 | SSFLSPEHQKAQQRKESKKP  | Negative |
| Q9EQX0 | LSMLWMDMAMAGSSFLSPEH  | Negative |
| Q9EQX0 | LLSMLWMDMAMAGSSFLSPE  | Negative |
| Q9EQX0 | SGTICSLLLLLSMLWMDMAMA | Negative |
| Q9EQX0 | SPEHQKAQQRKESKKPPAKL  | Negative |
| Q9EQX0 | MAGSSFLSPEHQKAQQRKES  | Negative |
| Q9EQX0 | DMAMAGSSFLSPEHQKAQQR  | Negative |
| Q9EQX0 | LSPEHQKAQQRKESKKPPAK  | Negative |
| Q9EQX0 | LLSMLWMDMAMAGSSFLSP   | Negative |
| Q9EQX0 | GTICSLLLLLSMLWMDMAMAG | Negative |
| Q9EQX0 | GSSFLSPEHQKAQQRKESKK  | Negative |
| Q9EQX0 | LWMDMAMAGSSFLSPEHQKA  | Negative |
| Q9EQX0 | MLWMDMAMAGSSFLSPEHQK  | Negative |
| Q9EQX0 | AMAGSSFLSPEHQKAQQRKE  | Negative |
| Q9EQX0 | WMDMAMAGSSFLSPEHQKAQ  | Negative |
| Q9EQX0 | LLLLSMLWMDMAMAGSSFLS  | Negative |
| Q9EQX0 | SMLWMDMAMAGSSFLSPEHQ  | Negative |
| Q9EZE7 | MKKAARGSLALFNLSLYGA   | Negative |
| Q9EZE7 | ELASRVMKKAARGSLALFN   | Negative |
| Q9EZE7 | KAARGSLALFNLSLYGAFL   | Negative |
| Q9EZE7 | IYALKYCHATGGLIAVSELA  | Negative |
| Q9EZE7 | ALKYCHATGGLIAVSELASR  | Negative |
| Q9EZE7 | YALKYCHATGGLIAVSELAS  | Negative |
| Q9EZE7 | VMKKAARGSLALFNLSLYG   | Negative |
| Q9EZE7 | ASRVMKKAARGSLALFNLS   | Negative |
| Q9EZE7 | TGGLIAVSELASRVMKKAAR  | Negative |
| Q9EZE7 | YCHATGGLIAVSELASRVMK  | Negative |
| Q9EZE7 | ATGGLIAVSELASRVMKKA   | Negative |
| Q9EZE7 | VSELASRVMKKAARGSLAL   | Negative |
| Q9EZE7 | MNKIYALKYCHATGGLIAVS  | Negative |
| Q9EZE7 | GGLIAVSELASRVMKKAARG  | Negative |
| Q9EZE7 | NKIYALKYCHATGGLIAVSE  | Negative |
| Q9EZE7 | SELASRVMKKAARGSLALF   | Negative |
| Q9EZE7 | IAVSELASRVMKKAARGSLL  | Negative |
| Q9EZE7 | AVSELASRVMKKAARGSLLA  | Negative |
| Q9EZE7 | LKYCHATGGLIAVSELASRV  | Negative |
| Q9EZE7 | KYCHATGGLIAVSELASRVM  | Negative |
| Q9EZE7 | LASRVMKKAARGSLALFNL   | Negative |
| Q9EZE7 | GLIAVSELASRVMKKAARGS  | Negative |
| Q9EZE7 | AARGSLALFNLSLYGAFLS   | Negative |
| Q9EZE7 | HATGGLIAVSELASRVMKKA  | Negative |

|        |                      |          |
|--------|----------------------|----------|
| Q9EZE7 | LIAVSELASRVMKKAARGSL | Negative |
| Q9EZE7 | RVMKKAARGSLLALFNLSLY | Negative |
| Q9EZE7 | KKAARGSLLALFNLSLYGAF | Negative |
| Q9EZE7 | SRVMKKAARGSLLALFNLSL | Negative |
| Q9EZE7 | KIYALKYCHATGGLIAVSEL | Negative |
| Q9EZE7 | CHATGGLIAVSELASRVMKK | Negative |
| Q9F437 | VAAGLLTIAGSAIGQPAPAP | Negative |
| Q9F437 | LTIAGSAIGQPAPAPMPAMA | Negative |
| Q9F437 | SLVAAGLLTIAGSAIGQPAP | Negative |
| Q9F437 | MKVRCVSLVAAGLLTIAGSA | Negative |
| Q9F437 | GLLTIAGSAIGQPAPAPMPA | Negative |
| Q9F437 | AIGQPAPAPMPAMAPAAKPA | Negative |
| Q9F437 | AGLLTIAGSAIGQPAPAPMP | Negative |
| Q9F437 | GQPAPAPMPAMAPAAKPAMN | Negative |
| Q9F437 | AGSAIGQPAPAPMPAMAPAA | Negative |
| Q9F437 | QPAPAPMPAMAPAAKPAMNT | Negative |
| Q9F437 | APMPAMAPAAKPAMNTPVDR | Negative |
| Q9F437 | IGQPAPAPMPAMAPAAKPAM | Negative |
| Q9F437 | GSAIGQPAPAPMPAMAPAAK | Negative |
| Q9F437 | LVAAGLLTIAGSAIGQPAPA | Negative |
| Q9F437 | KVRCVSLVAAGLLTIAGSAI | Negative |
| Q9F437 | RCVSLVAAGLLTIAGSAIGQ | Negative |
| Q9F437 | LLTIAGSAIGQPAPAPMPAM | Negative |
| Q9F437 | SAIGQPAPAPMPAMAPAAKP | Negative |
| Q9F437 | TIAGSAIGQPAPAPMPAMAP | Negative |
| Q9F437 | PAPMPAMAPAAKPAMNTPVD | Negative |
| Q9F437 | MPAMAPAAKPAMNTPVDRAK | Negative |
| Q9F437 | AAGLLTIAGSAIGQPAPAPM | Negative |
| Q9F437 | APAPMPAMAPAAKPAMNTPV | Negative |
| Q9F437 | CVSLVAAGLLTIAGSAIGQP | Negative |
| Q9F437 | VRCVSLVAAGLLTIAGSAIG | Negative |
| Q9F437 | VSLVAAGLLTIAGSAIGQPA | Negative |
| Q9F437 | PAMAPAAKPAMNTPVDRAKI | Negative |
| Q9F437 | PMPAMAPAAKPAMNTPVDRA | Negative |
| Q9F437 | IAGSAIGQPAPAPMPAMAPA | Negative |
| Q9F646 | AQVFAADCKVTVDSTDQMSF | Negative |
| Q9F646 | CKVTVDSTDQMSFNTKAIEI | Negative |
| Q9F646 | VFAADCKVTVDSTDQMSFNT | Negative |
| Q9F646 | KVTVDSTDQMSFNTKAIEID | Negative |
| Q9F646 | SAQVFAADCKVTVDSTDQMS | Negative |
| Q9F646 | ASAQVFAADCKVTVDSTDQM | Negative |
| Q9F646 | TVDSTDQMSFNTKAIEIDKS | Negative |
| Q9F646 | AVAVSLLTLASAQVFAADCK | Negative |
| Q9F646 | QVFAADCKVTVDSTDQMSFN | Negative |
| Q9F646 | SLLTLASAQVFAADCKVTVD | Negative |
| Q9F646 | VDSTDQMSFNTKAIEIDKSC | Negative |

|        |                       |          |
|--------|-----------------------|----------|
| Q9F646 | AADCKVTVDSTDQMSFNKA   | Negative |
| Q9F646 | AVSLLTLASAQVFAADCKVT  | Negative |
| Q9F646 | FAKAVAVSLLTLASAQVFAA  | Negative |
| Q9F646 | KAVAVSLLTLASAQVFAADC  | Negative |
| Q9F646 | STDQMSFNKAIEIDKSKCT   | Negative |
| Q9F646 | MFAKAVAVSLLTLASAQVFA  | Negative |
| Q9F646 | TLASAQVFAADCKVTVDSTD  | Negative |
| Q9F646 | AKAVAVSLLTLASAQVFAAD  | Negative |
| Q9F646 | LTLASAQVFAADCKVTVDST  | Negative |
| Q9F646 | ADCKVTVDSTDQMSFNKAI   | Negative |
| Q9F646 | VTVDSTDQMSFNKAIEIDK   | Negative |
| Q9F646 | DCKVTVDSTDQMSFNKAIE   | Negative |
| Q9F646 | FAADCKVTVDSTDQMSFNK   | Negative |
| Q9F646 | TDQMSFNKAIEIDKSKCTF   | Negative |
| Q9F646 | DSTDQMSFNKAIEIDKSK    | Negative |
| Q9F646 | LASAQVFAADCKVTVDSTDQ  | Negative |
| Q9F646 | VSLLTLASAQVFAADCKVTV  | Negative |
| Q9F646 | LLTLASAQVFAADCKVTVDS  | Negative |
| Q9FRV0 | VSSIISHAQFDRMLLHRNDG  | Negative |
| Q9FRV0 | AMAIGTAHGSVSSIISHAQF  | Negative |
| Q9FRV0 | SVSSIISHAQFDRMLLHRND  | Negative |
| Q9FRV0 | AIGTAHGSVSSIISHAQFDR  | Negative |
| Q9FRV0 | AHGSVSSIISHAQFDRMLLH  | Negative |
| Q9FRV0 | VATVAMAIGTAHGSVSSIIS  | Negative |
| Q9FRV0 | ATVAMAIGTAHGSVSSIISH  | Negative |
| Q9FRV0 | VVVAVVATVAMAIGTAHGSV  | Negative |
| Q9FRV0 | LAVVVAVVATVAMAIGTAHG  | Negative |
| Q9FRV0 | RSLAVVVAVVATVAMAIGTA  | Negative |
| Q9FRV0 | VAVVATVAMAIGTAHGSVSS  | Negative |
| Q9FRV0 | SSIISHAQFDRMLLHRNDGA  | Negative |
| Q9FRV0 | VAMAIGTAHGSVSSIISHAQ  | Negative |
| Q9FRV0 | VVAVVATVAMAIGTAHGSVS  | Negative |
| Q9FRV0 | MRS LAVVVAVVATVAMAIGT | Negative |
| Q9FRV0 | IISHAQFDRMLLHRNDGACQ  | Negative |
| Q9FRV0 | TVAMAIGTAHGSVSSIISHA  | Negative |
| Q9FRV0 | HGSVSSIISHAQFDRMLLHR  | Negative |
| Q9FRV0 | ISHAQFDRMLLHRNDGACQA  | Negative |
| Q9FRV0 | VVATVAMAIGTAHGSVSSII  | Negative |
| Q9FRV0 | MAIGTAHGSVSSIISHAQFD  | Negative |
| Q9FRV0 | TAHGSVSSIISHAQFDRMLL  | Negative |
| Q9FRV0 | SHAQFDRMLLHRNDGACQAK  | Negative |
| Q9FRV0 | GTAHGSVSSIISHAQFDRML  | Negative |
| Q9FRV0 | GSVSSIISHAQFDRMLLHRN  | Negative |
| Q9FRV0 | SLAVVVAVVATVAMAIGTAH  | Negative |
| Q9FRV0 | SIISHAQFDRMLLHRNDGAC  | Negative |
| Q9FRV0 | AVVVAVVATVAMAIGTAHGS  | Negative |

|        |                      |          |
|--------|----------------------|----------|
| Q9FRV0 | IGTAHGSVSSIISHAQFDRM | Negative |
| Q9FRV1 | MAVTMAVAEQCGSQAGGATC | Negative |
| Q9FRV1 | TCPNCLCCSRFGWCGSTSDY | Negative |
| Q9FRV1 | LFAVLAMAVTMAVAEQCGSQ | Negative |
| Q9FRV1 | FAVLAMAVTMAVAEQCGSQA | Negative |
| Q9FRV1 | QAGGATCPNCLCCSRFGWCG | Negative |
| Q9FRV1 | MGAFALFAVLAMAVTMAVAE | Negative |
| Q9FRV1 | AGGATCPNCLCCSRFGWCGS | Negative |
| Q9FRV1 | GAFALFAVLAMAVTMAVAEQ | Negative |
| Q9FRV1 | TMAVAEQCGSQAGGATCPNC | Negative |
| Q9FRV1 | CGSQAGGATCPNCLCCSRFG | Negative |
| Q9FRV1 | FALFAVLAMAVTMAVAEQCG | Negative |
| Q9FRV1 | ATCPNCLCCSRFGWCGSTSD | Negative |
| Q9FRV1 | SQAGGATCPNCLCCSRFGWC | Negative |
| Q9FRV1 | AEQCGSQAGGATCPNCLCCS | Negative |
| Q9FRV1 | GSQAGGATCPNCLCCSRFGW | Negative |
| Q9FRV1 | VTMAVAEQCGSQAGGATCPN | Negative |
| Q9FRV1 | AVAEQCGSQAGGATCPNCLC | Negative |
| Q9FRV1 | VAEQCGSQAGGATCPNCLCC | Negative |
| Q9FRV1 | MAVAEQCGSQAGGATCPNCL | Negative |
| Q9FRV1 | EQCGSQAGGATCPNCLCCSR | Negative |
| Q9FRV1 | AMAVTMAVAEQCGSQAGGAT | Negative |
| Q9FRV1 | AFALFAVLAMAVTMAVAEQC | Negative |
| Q9FRV1 | AVLAMAVTMAVAEQCGSQAG | Negative |
| Q9FRV1 | LAMAVTMAVAEQCGSQAGGA | Negative |
| Q9FRV1 | AVTMAVAEQCGSQAGGATCP | Negative |
| Q9FRV1 | QCGSQAGGATCPNCLCCSRF | Negative |
| Q9FRV1 | VLAMAVTMAVAEQCGSQAGG | Negative |
| Q9FRV1 | GGATCPNCLCCSRFGWCGST | Negative |
| Q9FRV1 | GATCPNCLCCSRFGWCGSTS | Negative |
| Q9FXT4 | VAATLLPEAAALGNFTAESR | Negative |
| Q9FXT4 | LLLVAVAATLLPEAAALGNF | Negative |
| Q9FXT4 | VAVAATLLPEAAALGNFTA  | Negative |
| Q9FXT4 | LPEAAALGNFTAESRGARWR | Negative |
| Q9FXT4 | LLPEAAALGNFTAESRGARW | Negative |
| Q9FXT4 | ATLLPEAAALGNFTAESRGA | Negative |
| Q9FXT4 | AATLLPEAAALGNFTAESRG | Negative |
| Q9FXT4 | SPPSPRLLLLLLVAVAATLL | Negative |
| Q9FXT4 | LLVAVAATLLPEAAALGNFT | Negative |
| Q9FXT4 | SSSSPSPRLLLLLLVAVA   | Negative |
| Q9FXT4 | ASSSSPSPRLLLLLLVAV   | Negative |
| Q9FXT4 | LLLLVAVAATLLPEAAALGN | Negative |
| Q9FXT4 | SSSSPSPRLLLLLLVAVAA  | Negative |
| Q9FXT4 | LVAVAATLLPEAAALGNFTA | Negative |
| Q9FXT4 | PRLLLLLLVAVAATLLPEAA | Negative |
| Q9FXT4 | SPRLLLLLLVAVAATLLPEA | Negative |



|        |                      |          |
|--------|----------------------|----------|
| Q9FXT4 | RASSSSPPSPRLLLLLLVA  | Negative |
| Q9FXT4 | PEAAALGNFTAESRGARWRS | Negative |
| Q9FXT4 | LLLLLLVAVAATLLPEAAAL | Negative |
| Q9FXT4 | ARASSSSPPSPRLLLLLLV  | Negative |
| Q9FXT4 | RLLLLLLVAVAATLLPEAAA | Negative |
| Q9FXT4 | AVAATLLPEAAALGNFTAES | Negative |
| Q9FXT4 | TLLPEAAALGNFTAESRGAR | Negative |
| Q9FXT4 | SSPSPRLLLLLLVAVAAT   | Negative |
| Q9FXT4 | LLLLLVAVAATLLPEAAALG | Negative |
| Q9FXT4 | SSPSPRLLLLLLVAVAATL  | Negative |
| Q9FXT4 | MARASSSSPPSPRLLLLLL  | Negative |
| Q9FXT4 | EAAALGNFTAESRGARWRSR | Negative |
| Q9FXT4 | PSPRLLLLLLVAVAATLLPE | Negative |
| Q9FXT4 | PPSPRLLLLLLVAVAATLLP | Negative |
| Q9GK12 | TRHCVLLVWALLALLSLGAA | Negative |
| Q9GK12 | LVWALLALLSLGAAREDPPA | Negative |
| Q9GK12 | RHCVLLVWALLALLSLGAAR | Negative |
| Q9GK12 | ALLALLSLGAAREDPPACGS | Negative |
| Q9GK12 | CGSIVPRREWRALASECRER | Negative |
| Q9GK12 | LGAAREDPPACGSIVPRREW | Negative |
| Q9GK12 | SIVPRREWRALASECRERLT | Negative |
| Q9GK12 | LSLGAAREDPPACGSIVPRR | Negative |
| Q9GK12 | LLALLSLGAAREDPPACGSI | Negative |
| Q9GK12 | LLSLGAAREDPPACGSIVPR | Negative |
| Q9GK12 | EDPPACGSIVPRREWRALAS | Negative |
| Q9GK12 | AREDPPACGSIVPRREWRAL | Negative |
| Q9GK12 | CVLLVWALLALLSLGAARED | Negative |
| Q9GK12 | PPACGSIVPRREWRALASEC | Negative |
| Q9GK12 | AAREDPPACGSIVPRREWRA | Negative |
| Q9GK12 | WALLALLSLGAAREDPPACG | Negative |
| Q9GK12 | PACGSIVPRREWRALASECR | Negative |
| Q9GK12 | VWALLALLSLGAAREDPPAC | Negative |
| Q9GK12 | SLGAAREDPPACGSIVPRRE | Negative |
| Q9GK12 | ALLSLGAAREDPPACGSIVP | Negative |
| Q9GK12 | HCVLLVWALLALLSLGAARE | Negative |
| Q9GK12 | MTRHCVLLVWALLALLSLGA | Negative |
| Q9GK12 | GSIVPRREWRALASECRERL | Negative |
| Q9GK12 | REDPPACGSIVPRREWRALA | Negative |
| Q9GK12 | GAAREDPPACGSIVPRREWR | Negative |
| Q9GK12 | LALLSLGAAREDPPACGSIV | Negative |
| Q9GK12 | DPPACGSIVPRREWRALASE | Negative |
| Q9GK12 | ACGSIVPRREWRALASECRE | Negative |
| Q9GK12 | VLLVWALLALLSLGAAREDP | Negative |
| Q9GL30 | MSRHSQDERLGLPQPPALLP | Negative |
| Q9GL30 | VAVPLSQAGVYYATAYWMPT | Negative |
| Q9GL30 | LLLLLAVAVPLSQAGVYYAT | Negative |

|        |                       |          |
|--------|-----------------------|----------|
| Q9GL30 | LLLLAVAVPLSQAGVYYATA  | Negative |
| Q9GL30 | QPPALLPLLLLLLAVAVPLS  | Negative |
| Q9GL30 | LLLAVAVPLSQAGVYYATAY  | Negative |
| Q9GL30 | ALLPLLLLLLAVAVPLSQAG  | Negative |
| Q9GL30 | LLPLLLLLLAVAVPLSQAGV  | Negative |
| Q9GL30 | RHSQDERLGLPQPPALLPLL  | Negative |
| Q9GL30 | QDERLGLPQPPALLPLLLLL  | Negative |
| Q9GL30 | ERLGLPQPPALLPLLLLLLA  | Negative |
| Q9GL30 | SQDERLGLPQPPALLPLLLLL | Negative |
| Q9GL30 | PALLPLLLLLLAVAVPLSQA  | Negative |
| Q9GL30 | RLGLPQPPALLPLLLLLLAV  | Negative |
| Q9GL30 | LPLLLLLLAVAVPLSQAGVY  | Negative |
| Q9GL30 | PLLLLLLAVAVPLSQAGVYY  | Negative |
| Q9GL30 | PPALLPLLLLLLAVAVPLSQ  | Negative |
| Q9GL30 | VPLSQAGVYYATAYWMPTEK  | Negative |
| Q9GL30 | LAVAVPLSQAGVYYATAYWM  | Negative |
| Q9GL30 | AVPLSQAGVYYATAYWMPTE  | Negative |
| Q9GL30 | LLAVAVPLSQAGVYYATAYW  | Negative |
| Q9GL30 | LGLPQPPALLPLLLLLLAVA  | Negative |
| Q9GL30 | SRHSQDERLGLPQPPALLPL  | Negative |
| Q9GL30 | LPQPPALLPLLLLLLAVAVP  | Negative |
| Q9GL30 | AVAVPLSQAGVYYATAYWMP  | Negative |
| Q9GL30 | PQPPALLPLLLLLLAVAVPL  | Negative |
| Q9GL30 | GLPQPPALLPLLLLLLAVAV  | Negative |
| Q9GL30 | HSQDERLGLPQPPALLPLLL  | Negative |
| Q9GL30 | DERLGLPQPPALLPLLLLLL  | Negative |
| Q9GQV7 | LVVCLAWAVYCEDQRPPSLK  | Negative |
| Q9GQV7 | SLKTRFGRSADEPESDNYVS  | Negative |
| Q9GQV7 | FASIVVLVVCLAWAVYCEDQ  | Negative |
| Q9GQV7 | AWAVYCEDQRPPSLKTRFGR  | Negative |
| Q9GQV7 | WAVYCEDQRPPSLKTRFGRS  | Negative |
| Q9GQV7 | CEDQRPPSLKTRFGRSADEP  | Negative |
| Q9GQV7 | AVYCEDQRPPSLKTRFGRSA  | Negative |
| Q9GQV7 | ASIVVLVVCLAWAVYCEDQR  | Negative |
| Q9GQV7 | EDQRPPSLKTRFGRSADEPE  | Negative |
| Q9GQV7 | PPSLKTRFGRSADEPESDNY  | Negative |
| Q9GQV7 | VVCLAWAVYCEDQRPPSLKT  | Negative |
| Q9GQV7 | WKFASIVVLVVCLAWAVYCE  | Negative |
| Q9GQV7 | LKTRFGRSADEPESDNYVSN  | Negative |
| Q9GQV7 | LAWAVYCEDQRPPSLKTRFG  | Negative |
| Q9GQV7 | VYCEDQRPPSLKTRFGRSAD  | Negative |
| Q9GQV7 | CLAWAVYCEDQRPPSLKTRF  | Negative |
| Q9GQV7 | QRPPSLKTRFGRSADEPESD  | Negative |
| Q9GQV7 | MWKFASIVVLVVCLAWAVYC  | Negative |
| Q9GQV7 | PSLKTRFGRSADEPESDNYV  | Negative |
| Q9GQV7 | KFASIVVLVVCLAWAVYCED  | Negative |

|        |                      |          |
|--------|----------------------|----------|
| Q9GQV7 | DQRPPSLKTRFGRSADEPES | Negative |
| Q9GQV7 | VLVVCLAWAVYCEDQRPPSL | Negative |
| Q9GQV7 | YCEDQRPPSLKTRFGRSADE | Negative |
| Q9GQV7 | KTRFGRSADEPESDNYVSND | Negative |
| Q9GQV7 | TRFGRSADEPESDNYVSNDI | Negative |
| Q9GQV7 | IVVLVVCLAWAVYCEDQRPP | Negative |
| Q9GQV7 | VCLAWAVYCEDQRPPSLKTR | Negative |
| Q9GQV7 | RPPSLKTRFGRSADEPESDN | Negative |
| Q9GQV7 | SIVVLVVCLAWAVYCEDQRP | Negative |
| Q9GSA4 | ATNITMFLIVITLTSVAAQT | Negative |
| Q9GSA4 | QYSRGWTNGKRDGHKTEDIR | Negative |
| Q9GSA4 | NITMFLIVITLTSVAAQTFQ | Negative |
| Q9GSA4 | TNITMFLIVITLTSVAAQTF | Negative |
| Q9GSA4 | VITLTSVAAQTFQYSRGWTN | Negative |
| Q9GSA4 | AAQTFQYSRGWTNGKRDGHK | Negative |
| Q9GSA4 | LTSVAAQTFQYSRGWTNGKR | Negative |
| Q9GSA4 | TFQYSRGWTNGKRDGHKTED | Negative |
| Q9GSA4 | NGKRDGHKTEDIRDLTNNLE | Negative |
| Q9GSA4 | LIVITLTSVAAQTFQYSRGW | Negative |
| Q9GSA4 | ITLTSVAAQTFQYSRGWTNG | Negative |
| Q9GSA4 | TSVAAQTFQYSRGWTNGKRD | Negative |
| Q9GSA4 | TLTSVAAQTFQYSRGWTNGK | Negative |
| Q9GSA4 | FQYSRGWTNGKRDGHKTEDI | Negative |
| Q9GSA4 | TMFLIVITLTSVAAQTFQYS | Negative |
| Q9GSA4 | VAAQTFQYSRGWTNGKRDGH | Negative |
| Q9GSA4 | MATNITMFLIVITLTSVAAQ | Negative |
| Q9GSA4 | YSRGWTNGKRDGHKTEDIRD | Negative |
| Q9GSA4 | RGWTNGKRDGHKTEDIRDLT | Negative |
| Q9GSA4 | QTFQYSRGWTNGKRDGHKTE | Negative |
| Q9GSA4 | MFLIVITLTSVAAQTFQYSR | Negative |
| Q9GSA4 | SVAAQTFQYSRGWTNGKRDG | Negative |
| Q9GSA4 | WTNGKRDGHKTEDIRDLTNN | Negative |
| Q9GSA4 | AQTFQYSRGWTNGKRDGHKT | Negative |
| Q9GSA4 | IVITLTSVAAQTFQYSRGWT | Negative |
| Q9GSA4 | TNGKRDGHKTEDIRDLTNNL | Negative |
| Q9GSA4 | FLIVITLTSVAAQTFQYSRG | Negative |
| Q9GSA4 | SRGWTNGKRDGHKTEDIRDL | Negative |
| Q9GSA4 | GWTNGKRDGHKTEDIRDLTN | Negative |
| Q9GU69 | VGAAILIFVSDAQAQGDGED | Negative |
| Q9GU69 | ILIFVSDAQAQGDGEDPCQI | Negative |
| Q9GU69 | HLLLVGAAILIFVSDAQAQG | Negative |
| Q9GU69 | AAILIFVSDAQAQGDGEDPC | Negative |
| Q9GU69 | AILIFVSDAQAQGDGEDPCQ | Negative |
| Q9GU69 | LLVGAAILIFVSDAQAQGDG | Negative |
| Q9GU69 | AQAQGDGEDPCQIVRCSYGA | Negative |
| Q9GU69 | DAQAQGDGEDPCQIVRCSYG | Negative |

|        |                      |          |
|--------|----------------------|----------|
| Q9GU69 | DPCQIVRCSYGANCIAYGDT | Negative |
| Q9GU69 | RHLLLVGAAILIFVSDAQAQ | Negative |
| Q9GU69 | MRHLLLVGAAILIFVSDAQA | Negative |
| Q9GU69 | CQIVRCSYGANCIAYGDTAI | Negative |
| Q9GU69 | QGDGEDPCQIVRCSYGANCI | Negative |
| Q9GU69 | MMRHLLLVGAAILIFVSDAQ | Negative |
| Q9GU69 | PCQIVRCSYGANCIAYGDTA | Negative |
| Q9GU69 | GEDPCQIVRCSYGANCIAYG | Negative |
| Q9GU69 | SDAQAQGDGEDPCQIVRCSY | Negative |
| Q9GU69 | FVSDAQAQGDGEDPCQIVRC | Negative |
| Q9GU69 | DGEDPCQIVRCSYGANCIAY | Negative |
| Q9GU69 | LIFVSDAQAQGDGEDPCQIV | Negative |
| Q9GU69 | QAQGDGEDPCQIVRCSYGAN | Negative |
| Q9GU69 | QIVRCSYGANCIAYGDTAIC | Negative |
| Q9GU69 | LLLVGAAILIFVSDAQAQGD | Negative |
| Q9GU69 | GDGEDPCQIVRCSYGANCI  | Negative |
| Q9GU69 | GAAILIFVSDAQAQGDGEDP | Negative |
| Q9GU69 | VSDAQAQGDGEDPCQIVRCS | Negative |
| Q9GU69 | EDPCQIVRCSYGANCIAYGD | Negative |
| Q9GU69 | IFVSDAQAQGDGEDPCQIVR | Negative |
| Q9GU69 | AQGDGEDPCQIVRCSYGANC | Negative |
| Q9GZM7 | HLALGAQQGRGRRELAPGLH | Negative |
| Q9GZM7 | GRRELAPGLHLRGIRDAGGR | Negative |
| Q9GZM7 | PLGLLLLLPLAGHLALGAQQ | Negative |
| Q9GZM7 | GRGRRELAPGLHLRGIRDAG | Negative |
| Q9GZM7 | AQQGRGRRELAPGLHLRGIR | Negative |
| Q9GZM7 | LLLPLAGHLALGAQQGRGRR | Negative |
| Q9GZM7 | CPLGLLLLLPLAGHLALGAQ | Negative |
| Q9GZM7 | AGHLALGAQQGRGRRELAPG | Negative |
| Q9GZM7 | LGLLLLLPLAGHLALGAQQG | Negative |
| Q9GZM7 | QQGRGRRELAPGLHLRGIRD | Negative |
| Q9GZM7 | ELAPGLHLRGIRDAGGRYCQ | Negative |
| Q9GZM7 | ALGAQQGRGRRELAPGLHLR | Negative |
| Q9GZM7 | RELAPGLHLRGIRDAGGRYC | Negative |
| Q9GZM7 | WRCPLGLLLLLPLAGHLALG | Negative |
| Q9GZM7 | LAGHLALGAQQGRGRRELAP | Negative |
| Q9GZM7 | RGRRELAPGLHLRGIRDAGG | Negative |
| Q9GZM7 | LGAQQGRGRRELAPGLHLRG | Negative |
| Q9GZM7 | PLAGHLALGAQQGRGRRELA | Negative |
| Q9GZM7 | MWRCPLGLLLLLPLAGHLAL | Negative |
| Q9GZM7 | LLPLAGHLALGAQQGRGRRE | Negative |
| Q9GZM7 | LPLAGHLALGAQQGRGRREL | Negative |
| Q9GZM7 | GAQQGRGRRELAPGLHLRGI | Negative |
| Q9GZM7 | QGRGRRELAPGLHLRGIRDA | Negative |
| Q9GZM7 | LLLLPLAGHLALGAQQGRGR | Negative |
| Q9GZM7 | LLLLPLAGHLALGAQQGRG  | Negative |

|        |                      |          |
|--------|----------------------|----------|
| Q9GZM7 | RCPLGLLLLLPLAGHLALGA | Negative |
| Q9GZM7 | LALGAQQGRGRRELAPGLHL | Negative |
| Q9GZM7 | RRELAPGLHLRGIRDAGGRY | Negative |
| Q9GZM7 | GHLALGAQQGRGRRELAPGL | Negative |
| Q9GZV9 | LGARLRLWVCALCSVCSMSV | Negative |
| Q9GZV9 | PLLGSSWGGLIHLTYTARN  | Negative |
| Q9GZV9 | ALCSVCSMSVLRAYPNASPL | Negative |
| Q9GZV9 | ASPLLGSSWGGLIHLTYATA | Negative |
| Q9GZV9 | GARLRLWVCALCSVCSMSVL | Negative |
| Q9GZV9 | SMSVLRAYPNASPLLGSSWG | Negative |
| Q9GZV9 | PNASPLLGSSWGGLIHLTYA | Negative |
| Q9GZV9 | YPNASPLLGSSWGGLIHLTY | Negative |
| Q9GZV9 | RAYPNASPLLGSSWGGLIHL | Negative |
| Q9GZV9 | CSMSVLRAYPNASPLLGSSW | Negative |
| Q9GZV9 | AYPNASPLLGSSWGGLIHL  | Negative |
| Q9GZV9 | LRLWVCALCSVCSMSVLRAY | Negative |
| Q9GZV9 | MLGARLRLWVCALCSVCSMS | Negative |
| Q9GZV9 | RLWVCALCSVCSMSVLRAYP | Negative |
| Q9GZV9 | CALCSVCSMSVLRAYPNASP | Negative |
| Q9GZV9 | ARLRLWVCALCSVCSMSVLR | Negative |
| Q9GZV9 | LRAYPNASPLLGSSWGGLIH | Negative |
| Q9GZV9 | CSVCSMSVLRAYPNASPLLG | Negative |
| Q9GZV9 | SVCMSMSVLRAYPNASPLGS | Negative |
| Q9GZV9 | WVCALCSVCSMSVLRAYPNA | Negative |
| Q9GZV9 | MSVLRAYPNASPLLGSSWGG | Negative |
| Q9GZV9 | LWVCALCSVCSMSVLRAYPN | Negative |
| Q9GZV9 | NASPLLGSSWGGLIHLTYAT | Negative |
| Q9GZV9 | RLRLWVCALCSVCSMSVLRA | Negative |
| Q9GZV9 | LCSVCSMSVLRAYPNASPLL | Negative |
| Q9GZV9 | VCSMSVLRAYPNASPLLGSS | Negative |
| Q9GZV9 | VLRAYPNASPLLGSSWGGLI | Negative |
| Q9GZV9 | SPLLGSSWGGLIHLTYATAR | Negative |
| Q9GZV9 | SVLRAYPNASPLLGSSWGGL | Negative |
| Q9GZX6 | LLLALLVQGGAAAPISSHCR | Negative |
| Q9GZX6 | LLVQGGAAAPISSHCRLDKS | Negative |
| Q9GZX6 | QGGAAAPISSHCRLDKSNFQ | Negative |
| Q9GZX6 | LLLALLVQGGAAAPISSHC  | Negative |
| Q9GZX6 | ATSCLLLLALLVQGGAAAPI | Negative |
| Q9GZX6 | ALQKSVSSFLMGTLATSCLL | Negative |
| Q9GZX6 | VSSFLMGTLATSCLLLLALL | Negative |
| Q9GZX6 | SFLMGTLATSCLLLLALLVQ | Negative |
| Q9GZX6 | MAALQKSVSSFLMGTLATSC | Negative |
| Q9GZX6 | TLATSCLLLLALLVQGGAAA | Negative |
| Q9GZX6 | ALLVQGGAAAPISSHCRLDK | Negative |
| Q9GZX6 | KSVSSFLMGTLATSCLLLLA | Negative |
| Q9GZX6 | LVQGGAAAPISSHCRLDKSN | Negative |

|        |                      |          |
|--------|----------------------|----------|
| Q9GZX6 | QKSVSSFLMGTLATSCLLLL | Negative |
| Q9GZX6 | MGTLATSCLLLLALLVQGGA | Negative |
| Q9GZX6 | AALQKSVSSFLMGTLATSC  | Negative |
| Q9GZX6 | SSFLMGTLATSCLLLLALLV | Negative |
| Q9GZX6 | VQGGAAAPISSHCRLDKSNF | Negative |
| Q9GZX6 | FLMGTLATSCLLLLALLVQG | Negative |
| Q9GZX6 | LALLVQGGAAAPISSHCRLD | Negative |
| Q9GZX6 | LATSCLLLLALLVQGGAAAP | Negative |
| Q9GZX6 | LLALLVQGGAAAPISSHCRL | Negative |
| Q9GZX6 | LMGTATSCLLLLALLVQGG  | Negative |
| Q9GZX6 | CLLLLALLVQGGAAAPISSH | Negative |
| Q9GZX6 | SVSSFLMGTLATSCLLLLAL | Negative |
| Q9GZX6 | TSCLLLLALLVQGGAAAPIS | Negative |
| Q9GZX6 | GTLATSCLLLLALLVQGGAA | Negative |
| Q9GZX6 | LQKSVSSFLMGTLATSCLLL | Negative |
| Q9GZX6 | GGAAAPISSHCRLDKSNFQQ | Negative |
| Q9GZZ8 | DPAQEAGTSKPNEEISGPAE | Negative |
| Q9GZZ8 | SSDSTGADPAQEAGTSKPNE | Negative |
| Q9GZZ8 | FLAAVAGALVYAEDASSDST | Negative |
| Q9GZZ8 | AVAGALVYAEDASSDSTGAD | Negative |
| Q9GZZ8 | VAGALVYAEDASSDSTGADP | Negative |
| Q9GZZ8 | FTTLLFLAAVAGALVYAEDA | Negative |
| Q9GZZ8 | VYAEDASSDSTGADPAQEAG | Negative |
| Q9GZZ8 | KFTTLLFLAAVAGALVYAED | Negative |
| Q9GZZ8 | TGADPAQEAGTSKPNEEISG | Negative |
| Q9GZZ8 | AGALVYAEDASSDSTGADPA | Negative |
| Q9GZZ8 | ALVYAEDASSDSTGADPAQE | Negative |
| Q9GZZ8 | DASSDSTGADPAQEAGTSKP | Negative |
| Q9GZZ8 | AEDASSDSTGADPAQEAGTS | Negative |
| Q9GZZ8 | AAVAGALVYAEDASSDSTGA | Negative |
| Q9GZZ8 | LAAVAGALVYAEDASSDSTG | Negative |
| Q9GZZ8 | STGADPAQEAGTSKPNEEIS | Negative |
| Q9GZZ8 | MKFTTLLFLAAVAGALVYAE | Negative |
| Q9GZZ8 | LLFLAAVAGALVYAEDASSD | Negative |
| Q9GZZ8 | EDASSDSTGADPAQEAGTSK | Negative |
| Q9GZZ8 | DSTGADPAQEAGTSKPNEEI | Negative |
| Q9GZZ8 | LFLAAVAGALVYAEDASSDS | Negative |
| Q9GZZ8 | GADPAQEAGTSKPNEEISGP | Negative |
| Q9GZZ8 | TTLLFLAAVAGALVYAEDAS | Negative |
| Q9GZZ8 | SDSTGADPAQEAGTSKPNEE | Negative |
| Q9GZZ8 | ADPAQEAGTSKPNEEISGPA | Negative |
| Q9GZZ8 | GALVYAEDASSDSTGADPAQ | Negative |
| Q9GZZ8 | YAEDASSDSTGADPAQEAGT | Negative |
| Q9GZZ8 | ASSDSTGADPAQEAGTSKPN | Negative |
| Q9GZZ8 | LVYAEDASSDSTGADPAQEA | Negative |
| Q9H1M4 | KPTVTEQLKKCWNNYVQGHC | Negative |

|        |                       |          |
|--------|-----------------------|----------|
| Q9H1M4 | MIIAILLFQKPTVTEQLKKC  | Negative |
| Q9H1M4 | MGLFMIIAILLFQKPTVTEQ  | Negative |
| Q9H1M4 | PTVTEQLKKCWNNYVQGHCR  | Negative |
| Q9H1M4 | NNYVQGHCRKICRVNEVPEA  | Negative |
| Q9H1M4 | EQLKKCWNNYVQGHCRKICR  | Negative |
| Q9H1M4 | GLFMIIAILLFQKPTVTEQL  | Negative |
| Q9H1M4 | KCWNNYVQGHCRKICRVNEV  | Negative |
| Q9H1M4 | CWNNYVQGHCRKICRVNEVP  | Negative |
| Q9H1M4 | TVTEQLKKCWNNYVQGHCRK  | Negative |
| Q9H1M4 | YVQGHCRKICRVNEVPEALC  | Negative |
| Q9H1M4 | VQGHCRKICRVNEVPEALCE  | Negative |
| Q9H1M4 | FMIIAILLFQKPTVTEQLKK  | Negative |
| Q9H1M4 | QKPTVTEQLKKCWNNYVQGH  | Negative |
| Q9H1M4 | LKKCWNNYVQGHCRKICRVN  | Negative |
| Q9H1M4 | ILLFQKPTVTEQLKKCWNNY  | Negative |
| Q9H1M4 | VTEQLKKCWNNYVQGHCRKI  | Negative |
| Q9H1M4 | KKCWNNYVQGHCRKICRVNE  | Negative |
| Q9H1M4 | QLKKCWNNYVQGHCRKICRV  | Negative |
| Q9H1M4 | TEQLKKCWNNYVQGHCRKIC  | Negative |
| Q9H1M4 | NYVQGHCRKICRVNEVPEAL  | Negative |
| Q9H1M4 | LFMIIAILLFQKPTVTEQLK  | Negative |
| Q9H1M4 | IAILLFQKPTVTEQLKKCWN  | Negative |
| Q9H1M4 | QGHCRKICRVNEVPEALCEN  | Negative |
| Q9H1M4 | AILLFQKPTVTEQLKKCWNN  | Negative |
| Q9H1M4 | WNNYVQGHCRKICRVNEVPE  | Negative |
| Q9H1M4 | FQKPTVTEQLKKCWNNYVQG  | Negative |
| Q9H1M4 | LFQKPTVTEQLKKCWNNYVQ  | Negative |
| Q9H1M4 | LLFQKPTVTEQLKKCWNNYV  | Negative |
| Q9H293 | RERPRLGEDSSLISLFLQVV  | Negative |
| Q9H293 | VVAFLAMVMGTHTYSHWPSC  | Negative |
| Q9H293 | RPRLGEDSSLISLFLQVVAF  | Negative |
| Q9H293 | MGTHTYSHWPSCCPSKGQDT  | Negative |
| Q9H293 | DSSLISLFLQVVAFLAMVMG  | Negative |
| Q9H293 | AFLAMVMGTHTYSHWPSCCP  | Negative |
| Q9H293 | SLFLQVVAFLAMVMGTHTYSH | Negative |
| Q9H293 | PRLGEDSSLISLFLQVVAFL  | Negative |
| Q9H293 | LAMVMGTHTYSHWPSCCPSK  | Negative |
| Q9H293 | MRERPRLGEDSSLISLFLQV  | Negative |
| Q9H293 | LGEDSSLISLFLQVVAFLAM  | Negative |
| Q9H293 | LFLQVVAFLAMVMGTHTYSH  | Negative |
| Q9H293 | FLAMVMGTHTYSHWPSCCPS  | Negative |
| Q9H293 | ISLFLQVVAFLAMVMGTHTY  | Negative |
| Q9H293 | RLGEDSSLISLFLQVVAFLA  | Negative |
| Q9H293 | GEDSSLISLFLQVVAFLAMV  | Negative |
| Q9H293 | THTYSHWPSCCPSKGQDTSE  | Negative |
| Q9H293 | EDSSLISLFLQVVAFLAMVM  | Negative |

|        |                       |          |
|--------|-----------------------|----------|
| Q9H293 | MVMGTHTYSHWPSCCPSKGQ  | Negative |
| Q9H293 | AMVMGTHTYSHWPSCCPSKG  | Negative |
| Q9H293 | VMGTHTYSHWPSCCPSKGQD  | Negative |
| Q9H293 | LISLFLQVVAFLAMVMGTHT  | Negative |
| Q9H293 | SLISLFLQVVAFLAMVMGTH  | Negative |
| Q9H293 | GTHTYSHWPSCCPSKGQDTS  | Negative |
| Q9H293 | QVVAFLAMVMGTHTYSHWPS  | Negative |
| Q9H293 | ERPRLGEDSSLISLFLQVVA  | Negative |
| Q9H293 | VAFAMVMGTHTYSHWPSCC   | Negative |
| Q9H293 | FLQVVAFLAMVMGTHTYSHW  | Negative |
| Q9H293 | SSLISLFLQVVAFLAMVMGT  | Negative |
| Q9H4G1 | LGLPWKGGLSWALLLLLLGS  | Negative |
| Q9H4G1 | LLGSQILLIYAWHFHEQRDC  | Negative |
| Q9H4G1 | AWHFHEQRDCDEHNVMARYL  | Negative |
| Q9H4G1 | MLGLPWKGGLSWALLLLLLG  | Negative |
| Q9H4G1 | HFHEQRDCDEHNVMARYLPA  | Negative |
| Q9H4G1 | LLLGSQILLIYAWHFHEQRD  | Negative |
| Q9H4G1 | LLIYAWHFHEQRDCDEHNV   | Negative |
| Q9H4G1 | GLSWALLLLLLGSQILLIYA  | Negative |
| Q9H4G1 | GSQILLIYAWHFHEQRDCDE  | Negative |
| Q9H4G1 | LLLGSQILLIYAWHFHEQR   | Negative |
| Q9H4G1 | LIYAWHFHEQRDCDEHNVMA  | Negative |
| Q9H4G1 | LSWALLLLLLGSQILLIYAW  | Negative |
| Q9H4G1 | IYAWHFHEQRDCDEHVMAR   | Negative |
| Q9H4G1 | LLLLLGSQILLIYAWHFHEQ  | Negative |
| Q9H4G1 | QILLIYAWHFHEQRDCDEHN  | Negative |
| Q9H4G1 | LPWKGGGLSWALLLLLLGSQI | Negative |
| Q9H4G1 | GLPWKGGLSWALLLLLLGSQ  | Negative |
| Q9H4G1 | SWALLLLLLGSQILLIYAWH  | Negative |
| Q9H4G1 | ILLIYAWHFHEQRDCDEHNV  | Negative |
| Q9H4G1 | GGLSWALLLLLLGSQILLIY  | Negative |
| Q9H4G1 | YAWHFHEQRDCDEHNVMARY  | Negative |
| Q9H4G1 | WALLLLLLGSQILLIYAWHF  | Negative |
| Q9H4G1 | WHFHEQRDCDEHNVMARYLP  | Negative |
| Q9H4G1 | KGGLSWALLLLLLGSQILLI  | Negative |
| Q9H4G1 | ALLLLLLGSQILLIYAWHFH  | Negative |
| Q9H4G1 | WKGGLSWALLLLLLGSQILL  | Negative |
| Q9H4G1 | LGSQILLIYAWHFHEQRDCD  | Negative |
| Q9H4G1 | PWKGGGLSWALLLLLLGSQIL | Negative |
| Q9H4G1 | SQILLIYAWHFHEQRDCDEH  | Negative |
| Q9HB40 | RSPVPRWLLLLPLLLGLNAG  | Negative |
| Q9HB40 | VPRWLLLLPLLLGLNAGAVI  | Negative |
| Q9HB40 | PRWLLLLPLLLGLNAGAVID  | Negative |
| Q9HB40 | VIDWPTEEGKEVWDYVTVRK  | Negative |
| Q9HB40 | PLLLGLNAGAVIDWPTEEGK  | Negative |
| Q9HB40 | LLLGLNAGAVIDWPTEEGKE  | Negative |



|        |                      |          |
|--------|----------------------|----------|
| Q9HB40 | PVPRWLLLLPLLLGLNAGAV | Negative |
| Q9HB40 | LLGLNAGAVIDWPTEEGKEV | Negative |
| Q9HB40 | ALRRSPVPRWLLLLPLLLGL | Negative |
| Q9HB40 | WLLLLPLLLGLNAGAVIDWP | Negative |
| Q9HB40 | IDWPTEEGKEVWDYVTVRKD | Negative |
| Q9HB40 | MELALRRSPVPRWLLLLPLL | Negative |
| Q9HB40 | GLNAGAVIDWPTEEGKEVWD | Negative |
| Q9HB40 | LRRSPVPRWLLLLPLLLGLN | Negative |
| Q9HB40 | AGAVIDWPTEEGKEVWDYVT | Negative |
| Q9HB40 | LNAGAVIDWPTEEGKEVWDY | Negative |
| Q9HB40 | NAGAVIDWPTEEGKEVWDYV | Negative |
| Q9HB40 | LLLPLLLGLNAGAVIDWPTE | Negative |
| Q9HB40 | LPLLLGLNAGAVIDWPTEEG | Negative |
| Q9HB40 | LGLNAGAVIDWPTEEGKEVW | Negative |
| Q9HB40 | ELALRRSPVPRWLLLLPLLL | Negative |
| Q9HB40 | RRSPVPRWLLLLPLLLGLNA | Negative |
| Q9HB40 | LALRRSPVPRWLLLLPLLLG | Negative |
| Q9HB40 | LLPLLLGLNAGAVIDWPTEE | Negative |
| Q9HB40 | DWPTEEGKEVWDYVTVRKDA | Negative |
| Q9HB40 | SPVPRWLLLLPLLLGLNAGA | Negative |
| Q9HB40 | AVIDWPTEEGKEVWDYVTVR | Negative |
| Q9HB40 | GAVIDWPTEEGKEVWDYVTV | Negative |
| Q9HB40 | LLLLPLLLGLNAGAVIDWPT | Negative |
| Q9HC23 | LPPLLLTPRAGDAAVITGAC | Negative |
| Q9HC23 | LLTPRAGDAAVITGACDKD  | Negative |
| Q9HC23 | PLLLTPRAGDAAVITGACDK | Negative |
| Q9HC23 | SLCCAPLLLLLLLPPLLLT  | Negative |
| Q9HC23 | RAGDAAVITGACDKDSQCGG | Negative |
| Q9HC23 | APLLLLLLLPPLLLT      | Negative |
| Q9HC23 | CCAPLLLLLLLPPLLLT    | Negative |
| Q9HC23 | MRSLCCAPLLLLLLLPPLLL | Negative |
| Q9HC23 | LTPRAGDAAVITGACDKDSQ | Negative |
| Q9HC23 | LLPPLLLTPRAGDAAVITGA | Negative |
| Q9HC23 | RSLCCAPLLLLLLLPPLLLT | Negative |
| Q9HC23 | PPLLLTPRAGDAAVITGACD | Negative |
| Q9HC23 | ITGACDKDSQCGGGMCCAVS | Negative |
| Q9HC23 | VITGACDKDSQCGGGMCCAV | Negative |
| Q9HC23 | AVITGACDKDSQCGGGMCCA | Negative |
| Q9HC23 | AGDAAVITGACDKDSQCGGG | Negative |
| Q9HC23 | TPRAGDAAVITGACDKDSQC | Negative |
| Q9HC23 | LLLLLLPPLLLTPRAGDAAV | Negative |
| Q9HC23 | DAAVITGACDKDSQCGGGM  | Negative |
| Q9HC23 | GDAAVITGACDKDSQCGGGM | Negative |
| Q9HC23 | PLLLLLLLPPLLLTPRAGDA | Negative |
| Q9HC23 | LLLLPPLLLTPRAGDAAVIT | Negative |
| Q9HC23 | PRAGDAAVITGACDKDSQCG | Negative |

|        |                      |          |
|--------|----------------------|----------|
| Q9HC23 | LLLLLPPLLLTPRAGDAAVI | Negative |
| Q9HC23 | LCCAPLLLLLLLPPLLLTPR | Negative |
| Q9HC23 | CAPLLLLLLLPPLLLTPRAG | Negative |
| Q9HC23 | AAVITGACDKDSQCGGGMCC | Negative |
| Q9HC23 | LLLLLLLPPLLLTPRAGDAA | Negative |
| Q9HC23 | LLTPRAGDAAVITGACDKDS | Negative |
| Q9HE18 | VNNFGDNPGSLQMYIYVPNK | Negative |
| Q9HE18 | NNFGDNPGSLQMYIYVPNKL | Negative |
| Q9HE18 | GDNPGSLQMYIYVPNKLASK | Negative |
| Q9HE18 | FGDNPGSLQMYIYVPNKLAS | Negative |
| Q9HE18 | NPGSLQMYIYVPNKLASKPA | Negative |
| Q9HE18 | LVLAWLLPVVLAASLTQVNN | Negative |
| Q9HE18 | PVVLAASLTQVNNFGDNPGS | Negative |
| Q9HE18 | QVNNFGDNPGSLQMYIYVPN | Negative |
| Q9HE18 | TQVNNFGDNPGSLQMYIYVP | Negative |
| Q9HE18 | AASLTQVNNFGDNPGSLQMY | Negative |
| Q9HE18 | DNPGSLQMYIYVPNKLASKP | Negative |
| Q9HE18 | WLLPVVLAASLTQVNNFGDN | Negative |
| Q9HE18 | LPVVLAASLTQVNNFGDNPG | Negative |
| Q9HE18 | SLTQVNNFGDNPGSLQMYIY | Negative |
| Q9HE18 | VLAWLLPVVLAASLTQVNNF | Negative |
| Q9HE18 | VVLAASLTQVNNFGDNPGSL | Negative |
| Q9HE18 | VLVLAWLLPVVLAASLTQVN | Negative |
| Q9HE18 | LAASLTQVNNFGDNPGSLQM | Negative |
| Q9HE18 | LVLVLAWLLPVVLAASLTQV | Negative |
| Q9HE18 | IPLVLVLAWLLPVVLAASLT | Negative |
| Q9HE18 | NFGDNPGSLQMYIYVPNKLA | Negative |
| Q9HE18 | LAWLLPVVLAASLTQVNNFG | Negative |
| Q9HE18 | LTQVNNFGDNPGSLQMYIYV | Negative |
| Q9HE18 | ASLTQVNNFGDNPGSLQMYI | Negative |
| Q9HE18 | AIPLVLVLAWLLPVVLAASL | Negative |
| Q9HE18 | VLAASLTQVNNFGDNPGSLQ | Negative |
| Q9HE18 | LLPVVLAASLTQVNNFGDNP | Negative |
| Q9HE18 | MAIPLVLVLAWLLPVVLAAS | Negative |
| Q9HE18 | AWLLPVVLAASLTQVNNFGD | Negative |
| Q9HGE1 | LAAATAVSSALAAPFDFVPR | Negative |
| Q9HGE1 | TAVSSALAAPFDFVPRDNST | Negative |
| Q9HGE1 | KSVLAAATAVSSALAAPFDF | Negative |
| Q9HGE1 | AVSSALAAPFDFVPRDNSTA | Negative |
| Q9HGE1 | VLAAATAVSSALAAPFDFVP | Negative |
| Q9HGE1 | SALAAPFDFVPRDNSTALQA | Negative |
| Q9HGE1 | FVPRDNSTALQARQVTPNAE | Negative |
| Q9HGE1 | SIKSVLAAATAVSSALAAPF | Negative |
| Q9HGE1 | LAAPFDFVPRDNSTALQARQ | Negative |
| Q9HGE1 | PFDFVPRDNSTALQARQVTP | Negative |
| Q9HGE1 | AAPFDFVPRDNSTALQARQV | Negative |

|        |                      |          |
|--------|----------------------|----------|
| Q9HGE1 | APFDFVPRDNSTALQARQVT | Negative |
| Q9HGE1 | DNSTALQARQVTPNAEGWHN | Negative |
| Q9HGE1 | VSSALAAPFDFVPRDNSTAL | Negative |
| Q9HGE1 | VSIKSVLAAATAVSSALAAP | Negative |
| Q9HGE1 | MVSIKSVLAAATAVSSALAA | Negative |
| Q9HGE1 | RDNSTALQARQVTPNAEGWH | Negative |
| Q9HGE1 | SSALAAPFDFVPRDNSTALQ | Negative |
| Q9HGE1 | STALQARQVTPNAEGWHNGY | Negative |
| Q9HGE1 | AAATAVSSALAAPFDFVPRD | Negative |
| Q9HGE1 | VPRDNSTALQARQVTPNAEG | Negative |
| Q9HGE1 | DFVPRDNSTALQARQVTPNA | Negative |
| Q9HGE1 | ALAAPFDFVPRDNSTALQAR | Negative |
| Q9HGE1 | AATAVSSALAAPFDFVPRDN | Negative |
| Q9HGE1 | NSTALQARQVTPNAEGWHNG | Negative |
| Q9HGE1 | PRDNSTALQARQVTPNAEGW | Negative |
| Q9HGE1 | ATAVSSALAAPFDFVPRDNS | Negative |
| Q9HGE1 | SVLAAATAVSSALAAPFDFV | Negative |
| Q9HGE1 | IKSVLAAATAVSSALAAPFD | Negative |
| Q9HU05 | QAQPLSPALQQLLSLSSQRL | Negative |
| Q9HU05 | ALLLLQGPLLQAQPLSPALQ | Negative |
| Q9HU05 | LQGPLLQAQPLSPALQQLLS | Negative |
| Q9HU05 | MRPSFASWGLLALLLLQGPL | Negative |
| Q9HU05 | SFASWGLLALLLLQGPLLQA | Negative |
| Q9HU05 | PSFASWGLLALLLLQGPLLQ | Negative |
| Q9HU05 | PLLQAQPLSPALQQLLSLSS | Negative |
| Q9HU05 | LALLLLQGPLLQAQPLSPAL | Negative |
| Q9HU05 | ALQQLSLSSQRLQLADQVA  | Negative |
| Q9HU05 | LLQAQPLSPALQQLLSLSSQ | Negative |
| Q9HU05 | FASWGLLALLLLQGPLLQAQ | Negative |
| Q9HU05 | LSPALQQLSLSSQRLQLAD  | Negative |
| Q9HU05 | SWGLLALLLLQGPLLQAQPL | Negative |
| Q9HU05 | QGPLLQAQPLSPALQQLLSL | Negative |
| Q9HU05 | LQAQPLSPALQQLLSLSSQR | Negative |
| Q9HU05 | LLQGPLLQAQPLSPALQQLL | Negative |
| Q9HU05 | GPLLQAQPLSPALQQLLSLS | Negative |
| Q9HU05 | WGLLALLLLQGPLLQAQPLS | Negative |
| Q9HU05 | LLQGPLLQAQPLSPALQQL  | Negative |
| Q9HU05 | PLSPALQQLLSLSSQRLQLA | Negative |
| Q9HU05 | QPLSPALQQLLSLSSQRLQL | Negative |
| Q9HU05 | LQQLSLSSQRLQLADQVAQ  | Negative |
| Q9HU05 | AQPLSPALQQLLSLSSQRLQ | Negative |
| Q9HU05 | LLLQGPLLQAQPLSPALQQ  | Negative |
| Q9HU05 | SPALQQLSLSSQRLQLADQ  | Negative |
| Q9HU05 | ASWGLLALLLLQGPLLQAQP | Negative |
| Q9HU05 | RPSFASWGLLALLLLQGPLL | Negative |
| Q9HU05 | LLALLLLQGPLLQAQPLSPA | Negative |

|        |                      |          |
|--------|----------------------|----------|
| Q9HU05 | PALQQLLSLSSQRLQLADQV | Negative |
| Q9HZQ8 | QQFTEFWTPGKPNPSICKSP | Negative |
| Q9HZQ8 | NLRYALGALALSVSAASLAA | Negative |
| Q9HZQ8 | SAASLAAPSEAQQFTEFWTP | Negative |
| Q9HZQ8 | RYALGALALSVSAASLAAPS | Negative |
| Q9HZQ8 | AASLAAPSEAQQFTEFWTPG | Negative |
| Q9HZQ8 | MSNKNNLRYALGALALSVSA | Negative |
| Q9HZQ8 | KNNLRYALGALALSVSAASL | Negative |
| Q9HZQ8 | ALALSVSAASLAAPSEAQQF | Negative |
| Q9HZQ8 | EAQQFTEFWTPGKPNPSICK | Negative |
| Q9HZQ8 | ASLAAPSEAQQFTEFWTPGK | Negative |
| Q9HZQ8 | NNLRYALGALALSVSAASLA | Negative |
| Q9HZQ8 | SVSAASLAAPSEAQQFTEFW | Negative |
| Q9HZQ8 | AAPSEAQQFTEFWTPGKPNP | Negative |
| Q9HZQ8 | SNKNNLRYALGALALSVSAA | Negative |
| Q9HZQ8 | AQQFTEFWTPGKPNPSICKS | Negative |
| Q9HZQ8 | SLAAPSEAQQFTEFWTPGKP | Negative |
| Q9HZQ8 | LRYALGALALSVSAASLAAP | Negative |
| Q9HZQ8 | VSAASLAAPSEAQQFTEFWT | Negative |
| Q9HZQ8 | SEAQQFTEFWTPGKPNPSIC | Negative |
| Q9HZQ8 | APSEAQQFTEFWTPGKPNPS | Negative |
| Q9HZQ8 | LGALALSVSAASLAAPSEAQ | Negative |
| Q9HZQ8 | PSEAQQFTEFWTPGKPNPSI | Negative |
| Q9HZQ8 | NKNNLRYALGALALSVSAAS | Negative |
| Q9HZQ8 | YALGALALSVSAASLAAPSE | Negative |
| Q9HZQ8 | ALSVSAASLAAPSEAQQFTE | Negative |
| Q9HZQ8 | LAAPSEAQQFTEFWTPGKPN | Negative |
| Q9HZQ8 | GALALSVSAASLAAPSEAQQ | Negative |
| Q9HZQ8 | LSVSAASLAAPSEAQQFTEF | Negative |
| Q9HZQ8 | LALSVSAASLAAPSEAQQFT | Negative |
| Q9I194 | MPVQADMPRPTGLAADIRWT | Negative |
| Q9I194 | LGSMMPVQADMPRPTGLAAD | Negative |
| Q9I194 | PTGLAADIRWTAYGVPHIRA | Negative |
| Q9I194 | LLGSMMPVQADMPRPTGLAA | Negative |
| Q9I194 | LAGMLLGSMMPVQADMPRPT | Negative |
| Q9I194 | SMMPVQADMPRPTGLAADIR | Negative |
| Q9I194 | GSMMPVQADMPRPTGLAADI | Negative |
| Q9I194 | MLLGSMMPVQADMPRPTGLA | Negative |
| Q9I194 | GMRTVLTGLAGMLLGSMMPV | Negative |
| Q9I194 | VQADMPRPTGLAADIRWTAY | Negative |
| Q9I194 | TVLTGLAGMLLGSMMPVQAD | Negative |
| Q9I194 | GMLLGSMMPVQADMPRPTGL | Negative |
| Q9I194 | RTVLTGLAGMLLGSMMPVQA | Negative |
| Q9I194 | TGLAADIRWTAYGVPHIRAK | Negative |
| Q9I194 | DMPRPTGLAADIRWTAYGVP | Negative |
| Q9I194 | AGMLLGSMMPVQADMPRPTG | Negative |

|        |                      |          |
|--------|----------------------|----------|
| Q9I194 | MPRPTGLAADIRWTAYGVPH | Negative |
| Q9I194 | QADMPRPTGLAADIRWTAYG | Negative |
| Q9I194 | GLAADIRWTAYGVPHIRAKD | Negative |
| Q9I194 | RPTGLAADIRWTAYGVPHIR | Negative |
| Q9I194 | TGLAGMLLGSMMPVQADMPR | Negative |
| Q9I194 | LTGLAGMLLGSMMPVQADMP | Negative |
| Q9I194 | PRPTGLAADIRWTAYGVPHI | Negative |
| Q9I194 | MGMRTVLTGLAGMLLGSMMP | Negative |
| Q9I194 | MMPVQADMPRPTGLAADIRW | Negative |
| Q9I194 | VLTGLAGMLLGSMMPVQADM | Negative |
| Q9I194 | ADMPRPTGLAADIRWTAYGV | Negative |
| Q9I194 | PVQADMPRPTGLAADIRWTA | Negative |
| Q9I194 | MRTVLTGLAGMLLGSMMPVQ | Negative |
| Q9I589 | PLTLALFLPQAAHAHGSMET | Negative |
| Q9I589 | GSMETPPSRVYGCFLGEPEN | Negative |
| Q9I589 | MKHYSATLALLPLTLALFLP | Negative |
| Q9I589 | SATLALLPLTLALFLPQAAH | Negative |
| Q9I589 | TLALFLPQAAHAHGSMETPP | Negative |
| Q9I589 | LPQAAHAHGSMETPPSRVYG | Negative |
| Q9I589 | LALFLPQAAHAHGSMETPPS | Negative |
| Q9I589 | TLALLPLTLALFLPQAAHAH | Negative |
| Q9I589 | LALLPLTLALFLPQAAHAHG | Negative |
| Q9I589 | SMETPPSRVYGCFLGEPENP | Negative |
| Q9I589 | AHAHGSMETPPSRVYGCFL  | Negative |
| Q9I589 | YSATLALLPLTLALFLPQAA | Negative |
| Q9I589 | HYSATLALLPLTLALFLPQA | Negative |
| Q9I589 | LFLPQAAHAHGSMETPPSRV | Negative |
| Q9I589 | AAHAHGSMETPPSRVYGCFL | Negative |
| Q9I589 | ALFLPQAAHAHGSMETPPSR | Negative |
| Q9I589 | AHGSMETPPSRVYGCFLGEP | Negative |
| Q9I589 | QAAHAHGSMETPPSRVYGCF | Negative |
| Q9I589 | HAHGSMETPPSRVYGCFLG  | Negative |
| Q9I589 | KHYSATLALLPLTLALFLPQ | Negative |
| Q9I589 | LLPLTLALFLPQAAHAHGS  | Negative |
| Q9I589 | HGSMETPPSRVYGCFLGEP  | Negative |
| Q9I589 | FLPQAAHAHGSMETPPSRVY | Negative |
| Q9I589 | LTLALFLPQAAHAHGSMETP | Negative |
| Q9I589 | PQAAHAHGSMETPPSRVYGC | Negative |
| Q9I589 | METPPSRVYGCFLGEPENPK | Negative |
| Q9I589 | ALLPLTLALFLPQAAHAHGS | Negative |
| Q9I589 | ETPPSRVYGCFLGEPENPKS | Negative |
| Q9I589 | ATLALLPLTLALFLPQAAHA | Negative |
| Q9I596 | LSMPARADDLPYRFGLGKAD | Negative |
| Q9I596 | FTALLLSCVLLALSMPARAD | Negative |
| Q9I596 | MPARADDLPYRFGLGKADIT | Negative |
| Q9I596 | RFGLGKADITGEAAEVGMMG | Negative |

|        |                      |          |
|--------|----------------------|----------|
| Q9I596 | CVLLALSMPARADDLPYRFG | Negative |
| Q9I596 | SAFTALLLSCVLLALSMPAR | Negative |
| Q9I596 | LLALSMPARADDLPYRFGLG | Negative |
| Q9I596 | ALSMPARADDLPYRFGLGKA | Negative |
| Q9I596 | SRSAFTALLLSCVLLALSMP | Negative |
| Q9I596 | ARADDLPYRFGLGKADITGE | Negative |
| Q9I596 | LSCVLLALSMPARADDLPYR | Negative |
| Q9I596 | LPYRFGLGKADITGEAAEVG | Negative |
| Q9I596 | AFTALLLSCVLLALSMPARA | Negative |
| Q9I596 | LLLSCVLLALSMPARADDLP | Negative |
| Q9I596 | PARADDLPYRFGLGKADITG | Negative |
| Q9I596 | RSAFTALLLSCVLLALSMPA | Negative |
| Q9I596 | ADDLPYRFGLGKADITGEAA | Negative |
| Q9I596 | LALSMPARADDLPYRFGLGK | Negative |
| Q9I596 | YRFGLGKADITGEAAEVGMM | Negative |
| Q9I596 | TALLLSCVLLALSMPARADD | Negative |
| Q9I596 | DLPYRFGLGKADITGEAAEV | Negative |
| Q9I596 | VLLALSMPARADDLPYRFG  | Negative |
| Q9I596 | MSRSAFTALLLSCVLLALSM | Negative |
| Q9I596 | ALLLSCVLLALSMPARADDL | Negative |
| Q9I596 | SCVLLALSMPARADDLPYRF | Negative |
| Q9I596 | RADDLPYRFGLGKADITGEA | Negative |
| Q9I596 | SMPARADDLPYRFGLGKADI | Negative |
| Q9I596 | PYRFGLGKADITGEAAEVGM | Negative |
| Q9I596 | DDLPYRFGLGKADITGEAAE | Negative |
| Q9I840 | DCPSGWSSYEGHCYKPFNEP | Negative |
| Q9I840 | WSSYEGHCYKPFNEPKNWAD | Negative |
| Q9I840 | SFGLLVVFLSLSGTGADCPS | Negative |
| Q9I840 | FIFVSFGLLVVFLSLSGTGA | Negative |
| Q9I840 | VVFLSLSGTGADCPSGWSSY | Negative |
| Q9I840 | SSYEGHCYKPFNEPKNWADA | Negative |
| Q9I840 | PSGWSSYEGHCYKPFNEPKN | Negative |
| Q9I840 | CPSGWSSYEGHCYKPFNEPK | Negative |
| Q9I840 | LLVVFLSLSGTGADCPSGWS | Negative |
| Q9I840 | MGRFIFVSFGLLVVFLSLSG | Negative |
| Q9I840 | GRFIFVSFGLLVVFLSLSGT | Negative |
| Q9I840 | TGADCPSGWSSYEGHCYKPF | Negative |
| Q9I840 | FVSFGLLVVFLSLSGTGADC | Negative |
| Q9I840 | LVVFLSLSGTGADCPSGWSS | Negative |
| Q9I840 | SGTGADCPSGWSSYEGHCYK | Negative |
| Q9I840 | LSLSGTGADCPSGWSSYEGH | Negative |
| Q9I840 | VFLSLSGTGADCPSGWSSYE | Negative |
| Q9I840 | ADCPSGWSSYEGHCYKPFNE | Negative |
| Q9I840 | GADCPSGWSSYEGHCYKPFN | Negative |
| Q9I840 | LSGTGADCPSGWSSYEGHCY | Negative |
| Q9I840 | IFVSFGLLVVFLSLSGTGAD | Negative |

|        |                      |          |
|--------|----------------------|----------|
| Q9I840 | SGWSSYEGHCYKPFNEPKNW | Negative |
| Q9I840 | VSFGLLVVFLSLSGTGADCP | Negative |
| Q9I840 | RFIFVSFGLLVVFLSLSGTG | Negative |
| Q9I840 | GWSSYEGHCYKPFNEPKNWA | Negative |
| Q9I840 | FLSLSGTGADCPSGWSSYEG | Negative |
| Q9I840 | GTGADCPSGWSSYEGHCYKP | Negative |
| Q9I840 | GLLVVFLSLSGTGADCPSGW | Negative |
| Q9I840 | SLSGTGADCPSGWSSYEGHC | Negative |
| Q9IAM1 | DCSSGWSSYEGHCYKVFKQS | Negative |
| Q9IAM1 | GLLVVFLSLSGTAADCSSGW | Negative |
| Q9IAM1 | GWSSYEGHCYKVFKQSKTWT | Negative |
| Q9IAM1 | WSSYEGHCYKVFKQSKTWT  | Negative |
| Q9IAM1 | ADCSSGWSSYEGHCYKVFKQ | Negative |
| Q9IAM1 | AADCSSGWSSYEGHCYKVFK | Negative |
| Q9IAM1 | TAADCSSGWSSYEGHCYKVF | Negative |
| Q9IAM1 | LLVVFLSLSGTAADCSSGWS | Negative |
| Q9IAM1 | GTAADCSSGWSSYEGHCYKV | Negative |
| Q9IAM1 | LSGTAADCSSGWSSYEGHCY | Negative |
| Q9IAM1 | SGTAADCSSGWSSYEGHCYK | Negative |
| Q9IAM1 | LVVFLSLSGTAADCSSGWSS | Negative |
| Q9IAM1 | SGWSSYEGHCYKVFKQSKTW | Negative |
| Q9IAM1 | FVSFGLLVVFLSLSGTAADC | Negative |
| Q9IAM1 | RFIFVSFGLLVVFLSLSGTA | Negative |
| Q9IAM1 | FIFVSFGLLVVFLSLSGTAA | Negative |
| Q9IAM1 | VVFLSLSGTAADCSSGWSSY | Negative |
| Q9IAM1 | GRFIFVSFGLLVVFLSLSGT | Negative |
| Q9IAM1 | LSLSGTAADCSSGWSSYEGH | Negative |
| Q9IAM1 | VFLSLSGTAADCSSGWSSYE | Negative |
| Q9IAM1 | SFGLLVVFLSLSGTAADCSS | Negative |
| Q9IAM1 | CSSGWSSYEGHCYKVFKQSK | Negative |
| Q9IAM1 | VSFGLLVVFLSLSGTAADCS | Negative |
| Q9IAM1 | SSYEGHCYKVFKQSKTWTDA | Negative |
| Q9IAM1 | SLSGTAADCSSGWSSYEGHC | Negative |
| Q9IAM1 | IFVSFGLLVVFLSLSGTAAD | Negative |
| Q9IAM1 | SSGWSSYEGHCYKVFKQSKT | Negative |
| Q9IAM1 | MGRFIFVSFGLLVVFLSLSG | Negative |
| Q9IAM1 | FLSLSGTAADCSSGWSSYEG | Negative |
| Q9JJS8 | LWSLVATLLGSKWPEPVFGR | Negative |
| Q9JJS8 | LGSKWPEPVFGRLVSLGFPE | Negative |
| Q9JJS8 | MRLIVLGLLWSLVATLLGS  | Negative |
| Q9JJS8 | RLVSLGFPEKYGNHQDRSWT | Negative |
| Q9JJS8 | WPEPVFGRLVSLGFPEKYGN | Negative |
| Q9JJS8 | LLIVLGLLWSLVATLLGSKW | Negative |
| Q9JJS8 | SKWPEPVFGRLVSLGFPEKY | Negative |
| Q9JJS8 | LGLLWSLVATLLGSKWPEPV | Negative |
| Q9JJS8 | VATLLGSKWPEPVFGRLVSL | Negative |

|        |                      |          |
|--------|----------------------|----------|
| Q9JJS8 | FGRLVSLGFPEKYGNHQDRS | Negative |
| Q9JJS8 | KWPEPVFGRLVSLGFPEKYG | Negative |
| Q9JJS8 | GSKWPEPVFGRLVSLGFPEK | Negative |
| Q9JJS8 | LVSLGFPEKYGNHQDRSWTL | Negative |
| Q9JJS8 | GRLVSLGFPEKYGNHQDRSW | Negative |
| Q9JJS8 | PEPVFGRLVSLGFPEKYGNH | Negative |
| Q9JJS8 | TLLGSKWPEPVFGRLVSLGF | Negative |
| Q9JJS8 | WSLVATLLGSKWPEPVFGRL | Negative |
| Q9JJS8 | SLVATLLGSKWPEPVFGRLV | Negative |
| Q9JJS8 | RLIVLGLLWSLVATLLGSK  | Negative |
| Q9JJS8 | VLGLLWSLVATLLGSKWPEP | Negative |
| Q9JJS8 | LLWSLVATLLGSKWPEPVFG | Negative |
| Q9JJS8 | LIVLGLLWSLVATLLGSKWP | Negative |
| Q9JJS8 | ATLLGSKWPEPVFGRLVSLG | Negative |
| Q9JJS8 | GLLWSLVATLLGSKWPEPVF | Negative |
| Q9JJS8 | LVATLLGSKWPEPVFGRLVS | Negative |
| Q9JJS8 | EPVFGRLVSLGFPEKYGNHQ | Negative |
| Q9JJS8 | LLGSKWPEPVFGRLVSLGFP | Negative |
| Q9JJS8 | PVFGRLVSLGFPEKYGNHQD | Negative |
| Q9JJS8 | VFGRLVSLGFPEKYGNHQDR | Negative |
| Q9JLA3 | GDANAAGAAAARRVTGLCYN | Negative |
| Q9JLA3 | ANAAGAAAARRVTGLCYNMG | Negative |
| Q9JLA3 | YNMGLLIALALLCLFSLAEA | Negative |
| Q9JLA3 | MCSRGDANAAGAAAARRVTG | Negative |
| Q9JLA3 | LLIALALLCLFSLAEANSKA | Negative |
| Q9JLA3 | GLLIALALLCLFSLAEANSK | Negative |
| Q9JLA3 | RRVTGLCYNMGLLIALALLC | Negative |
| Q9JLA3 | GLCYNMGLLIALALLCLFSL | Negative |
| Q9JLA3 | ALALLCLFSLAEANSKAITT | Negative |
| Q9JLA3 | IALALLCLFSLAEANSKAIT | Negative |
| Q9JLA3 | AAGAAAARRVTGLCYNMGLL | Negative |
| Q9JLA3 | CSRGDANAAGAAAARRVTGL | Negative |
| Q9JLA3 | AAAARRVTGLCYNMGLLIAL | Negative |
| Q9JLA3 | VTGLCYNMGLLIALALLCLF | Negative |
| Q9JLA3 | SRGDANAAGAAAARRVTGLC | Negative |
| Q9JLA3 | CYNMGLLIALALLCLFSLAE | Negative |
| Q9JLA3 | AARRVTGLCYNMGLLIALAL | Negative |
| Q9JLA3 | AGAAAARRVTGLCYNMGLLI | Negative |
| Q9JLA3 | MGLLIALALLCLFSLAEANS | Negative |
| Q9JLA3 | GAAAARRVTGLCYNMGLLIA | Negative |
| Q9JLA3 | NAAGAAAARRVTGLCYNMGL | Negative |
| Q9JLA3 | LCYNMGLLIALALLCLFSLA | Negative |
| Q9JLA3 | DANAAGAAAARRVTGLCYNM | Negative |
| Q9JLA3 | ARRVTGLCYNMGLLIALALL | Negative |
| Q9JLA3 | AAARRVTGLCYNMGLLIALA | Negative |
| Q9JLA3 | TGLCYNMGLLIALALLCLFS | Negative |



|        |                       |          |
|--------|-----------------------|----------|
| Q9JLA3 | RGDANAAGAAAARRVTGLCY  | Negative |
| Q9JLA3 | NMGLLIALALLCLFSLAEAN  | Negative |
| Q9JLA3 | RVTGLCYNMGLLIALALLCL  | Negative |
| Q9JMI7 | CQVSQTLSLEDDPGRTFNWT  | Negative |
| Q9JMI7 | MGACRIQYVLLIFLLIASRW  | Negative |
| Q9JMI7 | RIQYVLLIFLLIASRWTLVQ  | Negative |
| Q9JMI7 | YVLLIFLLIASRWTLVQNTY  | Negative |
| Q9JMI7 | LLIASRWTLVQNTYCQVSQT  | Negative |
| Q9JMI7 | CRIQYVLLIFLLIASRWTLV  | Negative |
| Q9JMI7 | TLVQNTYCQVSQTLSLEDDP  | Negative |
| Q9JMI7 | QNTYCQVSQTLSLEDDPGRT  | Negative |
| Q9JMI7 | QVSQTLSLEDDPGRTFNWTS  | Negative |
| Q9JMI7 | QYVLLIFLLIASRWTLVQNT  | Negative |
| Q9JMI7 | RWTLVQNTYCQVSQTLSLED  | Negative |
| Q9JMI7 | ACRIQYVLLIFLLIASRWTL  | Negative |
| Q9JMI7 | TYCQVSQTLSLEDDPGRTFN  | Negative |
| Q9JMI7 | LVQNTYCQVSQTLSLEDDPG  | Negative |
| Q9JMI7 | IASRWTLVQNTYCQVSQTLS  | Negative |
| Q9JMI7 | SRWTLVQNTYCQVSQTLSLE  | Negative |
| Q9JMI7 | LLIFLLIASRWTLVQNTYCQ  | Negative |
| Q9JMI7 | VQNTYCQVSQTLSLEDDPGR  | Negative |
| Q9JMI7 | VLLIFLLIASRWTLVQNTYC  | Negative |
| Q9JMI7 | GACRIQYVLLIFLLIASRWT  | Negative |
| Q9JMI7 | FLLIASRWTLVQNTYCQVSQ  | Negative |
| Q9JMI7 | IFLLIASRWTLVQNTYCQVS  | Negative |
| Q9JMI7 | VSQTLSLEDDPGRTFNWTSK  | Negative |
| Q9JMI7 | IQYVLLIFLLIASRWTLVQN  | Negative |
| Q9JMI7 | ASRWTLVQNTYCQVSQTLSL  | Negative |
| Q9JMI7 | LIASRWTLVQNTYCQVSQTL  | Negative |
| Q9JMI7 | YCQVSQTLSLEDDPGRTFNW  | Negative |
| Q9JMI7 | NTYCQVSQTLSLEDDPGRTF  | Negative |
| Q9JMI7 | WTLVQNTYCQVSQTLSLEDD  | Negative |
| Q9KK91 | GLMAKEVGVNSDFNVDVYGV  | Negative |
| Q9KK91 | TVIGAAVALASTGLMAKEVG  | Negative |
| Q9KK91 | VNSDFNVDVYGVAAMSVVNY  | Negative |
| Q9KK91 | GVNSDFNVDVYGVAAMSVVN  | Negative |
| Q9KK91 | RTVIGAAVALASTGLMAKEV  | Negative |
| Q9KK91 | ASTGLMAKEVGVNSDFNVDV  | Negative |
| Q9KK91 | STGLMAKEVGVNSDFNVDVY  | Negative |
| Q9KK91 | IGAAVALASTGLMAKEVGVN  | Negative |
| Q9KK91 | LMAKEVGVNSDFNVDVYGVA  | Negative |
| Q9KK91 | KRTVIGAAVALASTGLMAKE  | Negative |
| Q9KK91 | AKEVGVNSDFNVDVYGVAAAM | Negative |
| Q9KK91 | KMFKRTVIGAAVALASTGLM  | Negative |
| Q9KK91 | TGLMAKEVGVNSDFNVDVYG  | Negative |
| Q9KK91 | ALASTGLMAKEVGVNSDFNV  | Negative |

|        |                      |          |
|--------|----------------------|----------|
| Q9KK91 | MAKEVGVNSDFNVDVYGVA  | Negative |
| Q9KK91 | FKRTVIGAAVALASTGLMAK | Negative |
| Q9KK91 | AAVALASTGLMAKEVGVNSD | Negative |
| Q9KK91 | KEVGVNSDFNVDVYGVAAMS | Negative |
| Q9KK91 | DKMFKRTVIGAAVALASTGL | Negative |
| Q9KK91 | NSDFNVDVYGVAAMSVVNYN | Negative |
| Q9KK91 | VGVNSDFNVDVYGVAAMSVV | Negative |
| Q9KK91 | MFKRTVIGAAVALASTGLMA | Negative |
| Q9KK91 | GAAVALASTGLMAKEVGVNS | Negative |
| Q9KK91 | AVALASTGLMAKEVGVNSDF | Negative |
| Q9KK91 | EVGVNSDFNVDVYGVAAMSV | Negative |
| Q9KK91 | VALASTGLMAKEVGVNSDFN | Negative |
| Q9KK91 | SDFNVDVYGVAAMSVVNYNT | Negative |
| Q9KK91 | LASTGLMAKEVGVNSDFNVD | Negative |
| Q9KK91 | MDKMFKRTVIGAAVALASTG | Negative |
| Q9L7P2 | LLSMAILSSMAWATGASAAL | Negative |
| Q9L7P2 | ILSSMAWATGASAALVPPKG | Negative |
| Q9L7P2 | LSSMAWATGASAALVPPKGY | Negative |
| Q9L7P2 | PKLIRPTLLSMAILSSMAWA | Negative |
| Q9L7P2 | AILSSMAWATGASAALVPPK | Negative |
| Q9L7P2 | ALVPPKGYDAPIEKMKTGDH | Negative |
| Q9L7P2 | MAWATGASAALVPPKGYDAP | Negative |
| Q9L7P2 | TPKLIRPTLLSMAILSSMAW | Negative |
| Q9L7P2 | LIRPTLLSMAILSSMAWATG | Negative |
| Q9L7P2 | LVPPKGYDAPIEKMKTGDHN | Negative |
| Q9L7P2 | AALVPPKGYDAPIEKMKTGD | Negative |
| Q9L7P2 | ATGASAALVPPKGYDAPIEK | Negative |
| Q9L7P2 | LSMAILSSMAWATGASAALV | Negative |
| Q9L7P2 | SAALVPPKGYDAPIEKMKTG | Negative |
| Q9L7P2 | GASAALVPPKGYDAPIEKMK | Negative |
| Q9L7P2 | KLIRPTLLSMAILSSMAWAT | Negative |
| Q9L7P2 | TLLSMAILSSMAWATGASAA | Negative |
| Q9L7P2 | IRPTLLSMAILSSMAWATGA | Negative |
| Q9L7P2 | MQTPKLIRPTLLSMAILSSM | Negative |
| Q9L7P2 | AWATGASAALVPPKGYDAPI | Negative |
| Q9L7P2 | ASAALVPPKGYDAPIEKMKT | Negative |
| Q9L7P2 | QTPKLIRPTLLSMAILSSMA | Negative |
| Q9L7P2 | SMAILSSMAWATGASAALVP | Negative |
| Q9L7P2 | RPTLLSMAILSSMAWATGAS | Negative |
| Q9L7P2 | WATGASAALVPPKGYDAPIE | Negative |
| Q9L7P2 | SMAWATGASAALVPPKGYDA | Negative |
| Q9L7P2 | SSMAWATGASAALVPPKGYD | Negative |
| Q9L7P2 | TGASAALVPPKGYDAPIEKM | Negative |
| Q9L7P2 | PTLLSMAILSSMAWATGASA | Negative |
| Q9LAB5 | TLALGTLIGVTVVENSAPTS | Negative |
| Q9LAB5 | TSKQAQAAITPYTYNGYIG  | Negative |

|        |                       |          |
|--------|-----------------------|----------|
| Q9LAB5 | TLIGVTVVENSAPTSKQAQA  | Negative |
| Q9LAB5 | LIGVTVVENSAPTSKQAQAA  | Negative |
| Q9LAB5 | LALGTLIGVTVVENSAPTSK  | Negative |
| Q9LAB5 | APTSKQAQAAITPYTYNGY   | Negative |
| Q9LAB5 | ALGTLIGVTVVENSAPTSKQ  | Negative |
| Q9LAB5 | PTSKQAQAAITPYTYNGYI   | Negative |
| Q9LAB5 | LGTLIGVTVVENSAPTSKQA  | Negative |
| Q9LAB5 | NSAPTSKQAQAAITPYTYN   | Negative |
| Q9LAB5 | CVAATLALGTLIGVTVVENS  | Negative |
| Q9LAB5 | VAATLALGTLIGVTVVENS   | Negative |
| Q9LAB5 | IGVTVVENSAPTSKQAQAAI  | Negative |
| Q9LAB5 | GVTTVVENSAPTSKQAQAAIT | Negative |
| Q9LAB5 | SKVCVAATLALGTLIGVTVV  | Negative |
| Q9LAB5 | SAPTSKQAQAAITPYTYNG   | Negative |
| Q9LAB5 | VENSAPTSKQAQAAITPYYT  | Negative |
| Q9LAB5 | KTSKVCVAATLALGTLIGVT  | Negative |
| Q9LAB5 | VVENSAPTSKQAQAAITPY   | Negative |
| Q9LAB5 | VCVAATLALGTLIGVTVVEN  | Negative |
| Q9LAB5 | ENSAPTSKQAQAAITPYTY   | Negative |
| Q9LAB5 | MNKTSKVCVAATLALGTLIG  | Negative |
| Q9LAB5 | TSKVCVAATLALGTLIGVT   | Negative |
| Q9LAB5 | KVCVAATLALGTLIGVTVVE  | Negative |
| Q9LAB5 | GTLIGVTVVENSAPTSKQAQ  | Negative |
| Q9LAB5 | VTTVVENSAPTSKQAQAAITP | Negative |
| Q9LAB5 | AATLALGTLIGVTVVENSAP  | Negative |
| Q9LAB5 | NKTSKVCVAATLALGTLIGV  | Negative |
| Q9LAB5 | ATLALGTLIGVTVVENSAPT  | Negative |
| Q9LAP7 | GVQAQAETLELQAESFANS   | Negative |
| Q9LAP7 | LGVQAQAETLELQAESFANS  | Negative |
| Q9LAP7 | SLLNSSIAISFAVLGVQAQA  | Negative |
| Q9LAP7 | LLNSSIAISFAVLGVQAQAE  | Negative |
| Q9LAP7 | KRSLNSSIAISFAVLGVQA   | Negative |
| Q9LAP7 | LELQAESFANS GGTYSDGQP | Negative |
| Q9LAP7 | SFAVLGVQAQAETLELQAES  | Negative |
| Q9LAP7 | TKRSLNSSIAISFAVLGVQ   | Negative |
| Q9LAP7 | KTKRSLNSSIAISFAVLGV   | Negative |
| Q9LAP7 | ELQAESFANS GGTYSDGQPN | Negative |
| Q9LAP7 | SSIAISFAVLGVQAQAETLE  | Negative |
| Q9LAP7 | QAETLELQAESFANS GGTY  | Negative |
| Q9LAP7 | ISFAVLGVQAQAETLELQAE  | Negative |
| Q9LAP7 | RSLNSSIAISFAVLGVQAQ   | Negative |
| Q9LAP7 | MFKTKRSLNSSIAISFAVL   | Negative |
| Q9LAP7 | FKTKRSLNSSIAISFAVLG   | Negative |
| Q9LAP7 | VLGVQAQAETLELQAESFAN  | Negative |
| Q9LAP7 | FAVLGVQAQAETLELQAESF  | Negative |
| Q9LAP7 | NSSIAISFAVLGVQAQAETL  | Negative |

|        |                       |          |
|--------|-----------------------|----------|
| Q9LAP7 | AETLELQAESFANSGGTYSD  | Negative |
| Q9LAP7 | TLELQAESFANSGGTYSDGQ  | Negative |
| Q9LAP7 | AISFAVLGVQAQAETLELQA  | Negative |
| Q9LAP7 | ETLELQAESFANSGGTYSDG  | Negative |
| Q9LAP7 | IAISFAVLGVQAQAETLELQ  | Negative |
| Q9LAP7 | VQAQAETLELQAESFANS GG | Negative |
| Q9LAP7 | QAQAETLELQAESFANS GG  | Negative |
| Q9LAP7 | LNSSIAISFAVLGVQAQAET  | Negative |
| Q9LAP7 | AQAETLELQAESFANS GGTY | Negative |
| Q9LAP7 | AVLGVQAQAETLELQAESFA  | Negative |
| Q9LCB9 | VATLGACAFQAHALDGKLVP  | Negative |
| Q9LCB9 | PDQGILVSVGQDVDSVNDYS  | Negative |
| Q9LCB9 | KLAKMISVATLGACAFQAHA  | Negative |
| Q9LCB9 | GACAFQAHALDGKLVPDQGI  | Negative |
| Q9LCB9 | MKKLAKMISVATLGACAFQA  | Negative |
| Q9LCB9 | ATLGACAFQAHALDGKLVPD  | Negative |
| Q9LCB9 | LDGKLVPDQGILVSVGQDVD  | Negative |
| Q9LCB9 | CAFQAHALDGKLVPDQGILV  | Negative |
| Q9LCB9 | TLGACAFQAHALDGKLVPDQ  | Negative |
| Q9LCB9 | AFQAHALDGKLVPDQGILVS  | Negative |
| Q9LCB9 | LGACAFQAHALDGKLVPDQG  | Negative |
| Q9LCB9 | HALDGKLVPDQGILVSVGQD  | Negative |
| Q9LCB9 | DQGILVSVGQDVDSVNDYSS  | Negative |
| Q9LCB9 | DGKLVPDQGILVSVGQDVDS  | Negative |
| Q9LCB9 | SVATLGACAFQAHALDGKLV  | Negative |
| Q9LCB9 | KKLAKMISVATLGACAFQAH  | Negative |
| Q9LCB9 | ALDGKLVPDQGILVSVGQDV  | Negative |
| Q9LCB9 | VPDQGILVSVGQDVDSVNDY  | Negative |
| Q9LCB9 | KLVPDQGILVSVGQDVDSVN  | Negative |
| Q9LCB9 | AHALDGKLVPDQGILVSVGQ  | Negative |
| Q9LCB9 | KMISVATLGACAFQAHALDG  | Negative |
| Q9LCB9 | LAKMISVATLGACAFQAHAL  | Negative |
| Q9LCB9 | MISVATLGACAFQAHALDGK  | Negative |
| Q9LCB9 | AKMISVATLGACAFQAHALD  | Negative |
| Q9LCB9 | QAHALDGKLVPDQGILVSVG  | Negative |
| Q9LCB9 | GKLVPDQGILVSVGQDVDSV  | Negative |
| Q9LCB9 | ACAFQAHALDGKLVPDQGIL  | Negative |
| Q9LCB9 | FQAHALDGKLVPDQGILVSV  | Negative |
| Q9LCB9 | LVPDQGILVSVGQDVDSVND  | Negative |
| Q9LD79 | HMQEAGAVKFDIKNQCGYTV  | Negative |
| Q9LD79 | AGAVKFDIKNQCGYTVWAAG  | Negative |
| Q9LD79 | AVKFDIKNQCGYTVWAAGLP  | Negative |
| Q9LD79 | EAGAVKFDIKNQCGYTVWAA  | Negative |
| Q9LD79 | KNQCGYTVWAAGLPGGGKRL  | Negative |
| Q9LD79 | KFDIKNQCGYTVWAAGLP GG | Negative |
| Q9LD79 | LTISSHMQEAGAVKFDIKNQ  | Negative |

|        |                      |          |
|--------|----------------------|----------|
| Q9LD79 | SSHMQEAGAVKFDIKNQCGY | Negative |
| Q9LD79 | FDIKNQCGYTVWAAGLPGGG | Negative |
| Q9LD79 | LAATLTISSHMQEAGAVKFD | Negative |
| Q9LD79 | TISSHMQEAGAVKFDIKNQC | Negative |
| Q9LD79 | ATLTISSHMQEAGAVKFDIK | Negative |
| Q9LD79 | GYTVWAAGLPGGGKRLDQGG | Negative |
| Q9LD79 | IKNQCGYTVWAAGLPGGGKR | Negative |
| Q9LD79 | DIKNQCGYTVWAAGLPGGGK | Negative |
| Q9LD79 | GAVKFDIKNQCGYTVWAAGL | Negative |
| Q9LD79 | VKFDIKNQCGYTVWAAGLPG | Negative |
| Q9LD79 | FLLAATLTISSHMQEAGAVK | Negative |
| Q9LD79 | QCGYTVWAAGLPGGGKRLDQ | Negative |
| Q9LD79 | LLAATLTISSHMQEAGAVKF | Negative |
| Q9LD79 | MQEAGAVKFDIKNQCGYTVW | Negative |
| Q9LD79 | CGYTVWAAGLPGGGKRLDQG | Negative |
| Q9LD79 | AFLLAATLTISSHMQEAGAV | Negative |
| Q9LD79 | SHMQEAGAVKFDIKNQCGYT | Negative |
| Q9LD79 | TLTISSHMQEAGAVKFDIKN | Negative |
| Q9LD79 | YTVWAAGLPGGGKRLDQGGT | Negative |
| Q9LD79 | NQCGYTVWAAGLPGGGKRLD | Negative |
| Q9LD79 | ISSHMQEAGAVKFDIKNQCG | Negative |
| Q9LD79 | QEAGAVKFDIKNQCGYTVWA | Negative |
| Q9LJD9 | QTEAPAPSPTSDAAMFVPAL | Negative |
| Q9LJD9 | VLMVAIVAFSAVGNVAAQTE | Negative |
| Q9LJD9 | VAIVAFSAVGNVAAQTEAPA | Negative |
| Q9LJD9 | IVVLMVAIVAFSAVGNVAAQ | Negative |
| Q9LJD9 | KMKLIVVLMVAIVAFSAVGN | Negative |
| Q9LJD9 | AFSAVGNVAAQTEAPAPSPT | Negative |
| Q9LJD9 | VAFSAVGNVAAQTEAPAPSP | Negative |
| Q9LJD9 | MKMKLIVVLMVAIVAFSAVG | Negative |
| Q9LJD9 | LMVAIVAFSAVGNVAAQTEA | Negative |
| Q9LJD9 | SMKMKLIVVLMVAIVAFSAV | Negative |
| Q9LJD9 | AVGNVAAQTEAPAPSPTSDA | Negative |
| Q9LJD9 | AQTEAPAPSPTSDAAMFVPA | Negative |
| Q9LJD9 | FSAVGNVAAQTEAPAPSPTS | Negative |
| Q9LJD9 | ESMKMKLIVVLMVAIVAFSA | Negative |
| Q9LJD9 | KLIVVLMVAIVAFSAVGNVA | Negative |
| Q9LJD9 | VVLMVAIVAFSAVGNVAAQT | Negative |
| Q9LJD9 | VGNVAAQTEAPAPSPTSDAA | Negative |
| Q9LJD9 | SAVGNVAAQTEAPAPSPTSD | Negative |
| Q9LJD9 | IVAFSAVGNVAAQTEAPAPS | Negative |
| Q9LJD9 | AIVAFSAVGNVAAQTEAPAP | Negative |
| Q9LJD9 | EAPAPSPTSDAAMFVPALFA | Negative |
| Q9LJD9 | TEAPAPSPTSDAAMFVPALF | Negative |
| Q9LJD9 | NVAAQTEAPAPSPTSDAAMF | Negative |
| Q9LJD9 | GNVAAQTEAPAPSPTSDAAM | Negative |

|        |                      |          |
|--------|----------------------|----------|
| Q9LJD9 | MKLIVVLMVAIVAFSAVGNV | Negative |
| Q9LJD9 | VAAQTEAPAPSPTSDAAMFV | Negative |
| Q9LJD9 | AAQTEAPAPSPTSDAAMFVP | Negative |
| Q9LJD9 | LIVVLMVAIVAFSAVGNVAA | Negative |
| Q9LJD9 | MESMKMKLIVVLMVAIVAFS | Negative |
| Q9LLT1 | CWRGDSNWGQNRMKLADCAV | Negative |
| Q9LLT1 | MASPCLIAFLVFLCAIVSCC | Negative |
| Q9LLT1 | SDNPIDSCWRGDSNWGQNRM | Negative |
| Q9LLT1 | SPCLIAFLVFLCAIVSCCSD | Negative |
| Q9LLT1 | DSCWRGDSNWGQNRMKLADC | Negative |
| Q9LLT1 | PIDSCWRGDSNWGQNRMKLA | Negative |
| Q9LLT1 | SCCSDNPIDSCWRGDSNWGQ | Negative |
| Q9LLT1 | IDSCWRGDSNWGQNRMKLAD | Negative |
| Q9LLT1 | CCSDNPIDSCWRGDSNWGQN | Negative |
| Q9LLT1 | IVSCCSDNPIDSCWRGDSNW | Negative |
| Q9LLT1 | LCAIVSCCSDNPIDSCWRGD | Negative |
| Q9LLT1 | LIAFLVFLCAIVSCCSDNPI | Negative |
| Q9LLT1 | FLVFLCAIVSCCSDNPIDSC | Negative |
| Q9LLT1 | ASPCLIAFLVFLCAIVSCCS | Negative |
| Q9LLT1 | AIVSCCSDNPIDSCWRGDSN | Negative |
| Q9LLT1 | CLIAFLVFLCAIVSCCSDNP | Negative |
| Q9LLT1 | DNPIDSCWRGDSNWGQNRMK | Negative |
| Q9LLT1 | LVFLCAIVSCCSDNPIDSCW | Negative |
| Q9LLT1 | FLCAIVSCCSDNPIDSCWRG | Negative |
| Q9LLT1 | PCLIAFLVFLCAIVSCCSDN | Negative |
| Q9LLT1 | NPIDSCWRGDSNWGQNRMKL | Negative |
| Q9LLT1 | RGDSNWGQNRMKLADCAVGF | Negative |
| Q9LLT1 | AFLVFLCAIVSCCSDNPIDS | Negative |
| Q9LLT1 | CAIVSCCSDNPIDSCWRGDS | Negative |
| Q9LLT1 | CSDNPIDSCWRGDSNWGQNR | Negative |
| Q9LLT1 | VFLCAIVSCCSDNPIDSCWR | Negative |
| Q9LLT1 | VSCCSDNPIDSCWRGDSNWG | Negative |
| Q9LLT1 | WRGDSNWGQNRMKLADCAVG | Negative |
| Q9LLT1 | SCWRGDSNWGQNRMKLADCA | Negative |
| Q9LRC8 | QKGLCVLCFSLIFICGVIGE | Negative |
| Q9LRC8 | LCFSLIFICGVIGEETTIVK | Negative |
| Q9LRC8 | KGLCVLCFSLIFICGVIGEE | Negative |
| Q9LRC8 | ICGVIGEETTIVKIEENPVA | Negative |
| Q9LRC8 | LCVLCFSLIFICGVIGEETT | Negative |
| Q9LRC8 | SLIFICGVIGEETTIVKIEE | Negative |
| Q9LRC8 | FICGVIGEETTIVKIEENPV | Negative |
| Q9LRC8 | QVWQKGLCVLCFSLIFICGV | Negative |
| Q9LRC8 | GVIGEETTIVKIEENPVAQT | Negative |
| Q9LRC8 | FQVWQKGLCVLCFSLIFICG | Negative |
| Q9LRC8 | GFQVWQKGLCVLCFSLIFIC | Negative |
| Q9LRC8 | MGFQVWQKGLCVLCFSLIFI | Negative |

|        |                      |          |
|--------|----------------------|----------|
| Q9LRC8 | FSLIFICGVIGEETTIVKIE | Negative |
| Q9LRC8 | VIGEETTIVKIEENPVAQTD | Negative |
| Q9LRC8 | GEETTIVKIEENPVAQTDEN | Negative |
| Q9LRC8 | WQKGLCVLCFSLIFICGVIG | Negative |
| Q9LRC8 | TTIVKIEENPVAQTDENYVC | Negative |
| Q9LRC8 | CFSLIFICGVIGEETTIVKI | Negative |
| Q9LRC8 | ETTIVKIEENPVAQTDENYV | Negative |
| Q9LRC8 | TIVKIEENPVAQTDENYVCA | Negative |
| Q9LRC8 | VWQKGLCVLCFSLIFICGVI | Negative |
| Q9LRC8 | EETTIVKIEENPVAQTDENY | Negative |
| Q9LRC8 | IFICGVIGEETTIVKIEENP | Negative |
| Q9LRC8 | IGEETTIVKIEENPVAQTDE | Negative |
| Q9LRC8 | GLCVLCFSLIFICGVIGEET | Negative |
| Q9LRC8 | LIFICGVIGEETTIVKIEEN | Negative |
| Q9LRC8 | VLCFSLIFICGVIGEETTIV | Negative |
| Q9LRC8 | IVKIEENPVAQTDENYVCAT | Negative |
| Q9LRC8 | CGVIGEETTIVKIEENPVAQ | Negative |
| Q9LVC0 | LVAVIAFSTVHQTVAAVDAP | Negative |
| Q9LVC0 | VVVLVAVIAFSTVHQTVAAV | Negative |
| Q9LVC0 | IAFSTVHQTVAAVDAPAPSP | Negative |
| Q9LVC0 | STVHQTVAAVDAPAPSPTSD | Negative |
| Q9LVC0 | MEAMKMKLYVVVLVAVIAFS | Negative |
| Q9LVC0 | YVVVLVAVIAFSTVHQTVA  | Negative |
| Q9LVC0 | VVLVAVIAFSTVHQTVAAVD | Negative |
| Q9LVC0 | AVDAPAPSPTSDASSFIPTF | Negative |
| Q9LVC0 | VIAFSTVHQTVAAVDAPAPS | Negative |
| Q9LVC0 | LYVVVLVAVIAFSTVHQTVA | Negative |
| Q9LVC0 | KLYVVVLVAVIAFSTVHQT  | Negative |
| Q9LVC0 | VHQTVAAVDAPAPSPTSDAS | Negative |
| Q9LVC0 | VLVAVIAFSTVHQTVAAVDA | Negative |
| Q9LVC0 | HQTVAAVDAPAPSPTSDASS | Negative |
| Q9LVC0 | VDAPAPSPTSDASSFIPTFF | Negative |
| Q9LVC0 | AVIAFSTVHQTVAAVDAPAP | Negative |
| Q9LVC0 | MKMKLYVVVLVAVIAFSTVH | Negative |
| Q9LVC0 | AAVDAPAPSPTSDASSFIPT | Negative |
| Q9LVC0 | MKLYVVVLVAVIAFSTVHQT | Negative |
| Q9LVC0 | TVAAVDAPAPSPTSDASSFI | Negative |
| Q9LVC0 | TVHQTVAAVDAPAPSPTSDA | Negative |
| Q9LVC0 | AFSTVHQTVAAVDAPAPSPT | Negative |
| Q9LVC0 | KMKLYVVVLVAVIAFSTVHQ | Negative |
| Q9LVC0 | EAMKMKLYVVVLVAVIAFST | Negative |
| Q9LVC0 | FSTVHQTVAAVDAPAPSPTS | Negative |
| Q9LVC0 | VAAVDAPAPSPTSDASSFIP | Negative |
| Q9LVC0 | QTVAAVDAPAPSPTSDASSF | Negative |
| Q9LVC0 | AMKMKLYVVVLVAVIAFSTV | Negative |
| Q9LVC0 | DAPAPSPTSDASSFIPTFFA | Negative |

|        |                      |          |
|--------|----------------------|----------|
| Q9LXD6 | MASRNRALFSVSTLFLCFIV | Negative |
| Q9LXD6 | LFSVSTLFLCFIVCISEQSN | Negative |
| Q9LXD6 | SEQSNNQSSPVFACDVTGNP | Negative |
| Q9LXD6 | QSSPVFACDVTGNPSLAGLR | Negative |
| Q9LXD6 | CFIVCISEQSNNQSSPVFAC | Negative |
| Q9LXD6 | FLCFIVCISEQSNNQSSPVF | Negative |
| Q9LXD6 | ALFSVSTLFLCFIVCISEQS | Negative |
| Q9LXD6 | VSTLFLCFIVCISEQSNNQS | Negative |
| Q9LXD6 | STLFLCFIVCISEQSNNQSS | Negative |
| Q9LXD6 | ASRNRALFSVSTLFLCFIVC | Negative |
| Q9LXD6 | ISEQSNNQSSPVFACDVTGN | Negative |
| Q9LXD6 | VCISEQSNNQSSPVFACDVT | Negative |
| Q9LXD6 | SSPVFACDVTGNPSLAGLRF | Negative |
| Q9LXD6 | IVCISEQSNNQSSPVFACDV | Negative |
| Q9LXD6 | SRNRALFSVSTLFLCFIVCI | Negative |
| Q9LXD6 | NNQSSPVFACDVTGNPSLAG | Negative |
| Q9LXD6 | QSNNQSSPVFACDVTGNPSL | Negative |
| Q9LXD6 | RALFSVSTLFLCFIVCISEQ | Negative |
| Q9LXD6 | NRALFSVSTLFLCFIVCISE | Negative |
| Q9LXD6 | FIVCISEQSNNQSSPVFACD | Negative |
| Q9LXD6 | CISEQSNNQSSPVFACDVTG | Negative |
| Q9LXD6 | TLFLCFIVCISEQSNNQSSP | Negative |
| Q9LXD6 | LCFIVCISEQSNNQSSPVFA | Negative |
| Q9LXD6 | LFLCFIVCISEQSNNQSSPV | Negative |
| Q9LXD6 | SVSTLFLCFIVCISEQSNNQ | Negative |
| Q9LXD6 | NQSSPVFACDVTGNPSLAGL | Negative |
| Q9LXD6 | SNNQSSPVFACDVTGNPSLA | Negative |
| Q9LXD6 | RNRALFSVSTLFLCFIVCIS | Negative |
| Q9LXD6 | EQSNNQSSPVFACDVTGNPS | Negative |
| Q9LYF6 | VVLMMVIISVVASAQSEAPA | Negative |
| Q9LYF6 | SKASIVVLMMVIISVVASAQ | Negative |
| Q9LYF6 | LMMVIISVVASAQSEAPAPS | Negative |
| Q9LYF6 | SPTSGSSAISASFVSAGVAA | Negative |
| Q9LYF6 | APAPSPTSGSSAISASFVSA | Negative |
| Q9LYF6 | QSEAPAPSPTSGSSAISASF | Negative |
| Q9LYF6 | AISKASIVVLMMVIISVVAS | Negative |
| Q9LYF6 | ISVVASAQSEAPAPSPTSGS | Negative |
| Q9LYF6 | MMVIISVVASAQSEAPAPSP | Negative |
| Q9LYF6 | SAQSEAPAPSPTSGSSAISA | Negative |
| Q9LYF6 | MVIISVVASAQSEAPAPSPT | Negative |
| Q9LYF6 | ASAQSEAPAPSPTSGSSAIS | Negative |
| Q9LYF6 | MAISKASIVVLMMVIISVVA | Negative |
| Q9LYF6 | APSPTSGSSAISASFVSAGV | Negative |
| Q9LYF6 | VIISVVASAQSEAPAPSPTS | Negative |
| Q9LYF6 | SIVVLMMVIISVVASAQSEA | Negative |
| Q9LYF6 | VVASAQSEAPAPSPTSGSSA | Negative |



|        |                       |          |
|--------|-----------------------|----------|
| Q9LYF6 | SEAPAPSPTSGSSAISASFV  | Negative |
| Q9LYF6 | VASAQSEAPAPSPTSGSSAI  | Negative |
| Q9LYF6 | EAPAPSPTSGSSAISASFVS  | Negative |
| Q9LYF6 | ISKASIVVLMMVIIISVVASA | Negative |
| Q9LYF6 | PSPTSGSSAISASFVSAGVA  | Negative |
| Q9LYF6 | SVVASAQSEAPAPSPTSGSS  | Negative |
| Q9LYF6 | IISVVASAQSEAPAPSPTSG  | Negative |
| Q9LYF6 | PAPSPTSGSSAISASFVSAG  | Negative |
| Q9LYF6 | ASIVVLMMVIIISVVASAQSE | Negative |
| Q9LYF6 | VLMMVIIISVVASAQSEAPAP | Negative |
| Q9LYF6 | KASIVVLMMVIIISVVASAQS | Negative |
| Q9LYF6 | AQSEAPAPSPTSGSSAISAS  | Negative |
| Q9M069 | NYGQVADNLPPPSETVKLLQ  | Negative |
| Q9M069 | MALSISYFLLIFLSHFPS    | Negative |
| Q9M069 | HFPSSHAEPFIGVNYGQVAD  | Negative |
| Q9M069 | ISYFLLIFLSHFPSHAEP    | Negative |
| Q9M069 | SSHAEPFIGVNYGQVADNLP  | Negative |
| Q9M069 | EPFIGVNYGQVADNLPPPSE  | Negative |
| Q9M069 | HAEPFIGVNYGQVADNLPPP  | Negative |
| Q9M069 | YGQVADNLPPPSETVKLLQS  | Negative |
| Q9M069 | SHFPSSHAEPFIGVNYGQVA  | Negative |
| Q9M069 | VNYGQVADNLPPPSETVKLL  | Negative |
| Q9M069 | AEPFIGVNYGQVADNLPPPS  | Negative |
| Q9M069 | LSHFPSHAEPFIGVNYGQV   | Negative |
| Q9M069 | FPSSHAEPFIGVNYGQVADN  | Negative |
| Q9M069 | GVNYGQVADNLPPPSETVKL  | Negative |
| Q9M069 | FIGVNYGQVADNLPPPSETV  | Negative |
| Q9M069 | SIYFLLIFLSHFPSHAEPF   | Negative |
| Q9M069 | IYFLLIFLSHFPSHAEPFI   | Negative |
| Q9M069 | PSSHAEPFIGVNYGQVADNL  | Negative |
| Q9M069 | IFLSHFPSHAEPFIGVNYG   | Negative |
| Q9M069 | SISYFLLIFLSHFPSHAEP   | Negative |
| Q9M069 | PFIGVNYGQVADNLPPPSET  | Negative |
| Q9M069 | ALSISYFLLIFLSHFPSH    | Negative |
| Q9M069 | LSISYFLLIFLSHFPSHA    | Negative |
| Q9M069 | FLLIFLSHFPSHAEPFIGV   | Negative |
| Q9M069 | LLIFLSHFPSHAEPFIGVN   | Negative |
| Q9M069 | LIFLSHFPSHAEPFIGVNY   | Negative |
| Q9M069 | FLSHFPSHAEPFIGVNYGQ   | Negative |
| Q9M069 | SHAEPFIGVNYGQVADNLPP  | Negative |
| Q9M069 | IGVNYGQVADNLPPPSETVK  | Negative |
| Q9M0S4 | PGPAPTRSPLPSAQPPRTA   | Negative |
| Q9M0S4 | VVVLLFLALIASSAIAQAPG  | Negative |
| Q9M0S4 | KSVVVLLFLALIASSAIAQA  | Negative |
| Q9M0S4 | RSPLPSAQPPRTAAPT PSI  | Negative |
| Q9M0S4 | IASSAIAQAPGPAPTRSPLP  | Negative |

|        |                      |          |
|--------|----------------------|----------|
| Q9M0S4 | AQAPGPAPTRSPLPSAQQP  | Negative |
| Q9M0S4 | SAIAQAPGPAPTRSPLPSA  | Negative |
| Q9M0S4 | ASSAIAQAPGPAPTRSPLPS | Negative |
| Q9M0S4 | AIAQAPGPAPTRSPLPSAQ  | Negative |
| Q9M0S4 | SKSVVVLLFLALIASSAIAQ | Negative |
| Q9M0S4 | PAPTRSPLPSAQQPRTAAP  | Negative |
| Q9M0S4 | QAPGPAPTRSPLPSAQQPPR | Negative |
| Q9M0S4 | APGPAPTRSPLPSAQQPRT  | Negative |
| Q9M0S4 | MASKSVVVLLFLALIASSAI | Negative |
| Q9M0S4 | LALIASSAIAQAPGPAPTRS | Negative |
| Q9M0S4 | LIASSAIAQAPGPAPTRSPL | Negative |
| Q9M0S4 | APTRSPLPSAQQPRTAAPT  | Negative |
| Q9M0S4 | FLALIASSAIAQAPGPAPTR | Negative |
| Q9M0S4 | GPAPTRSPLPSAQQPRTAA  | Negative |
| Q9M0S4 | LFLALIASSAIAQAPGPAPT | Negative |
| Q9M0S4 | ASKSVVVLLFLALIASSAIA | Negative |
| Q9M0S4 | SSAIAQAPGPAPTRSPLPSP | Negative |
| Q9M0S4 | SVVVLLFLALIASSAIAQAP | Negative |
| Q9M0S4 | LLFLALIASSAIAQAPGPAP | Negative |
| Q9M0S4 | VLLFLALIASSAIAQAPGPA | Negative |
| Q9M0S4 | PTRSPLPSAQQPRTAAPT   | Negative |
| Q9M0S4 | IAQAPGPAPTRSPLPSAQP  | Negative |
| Q9M0S4 | TRSPLPSAQQPRTAAPT    | Negative |
| Q9M0S4 | ALIASSAIAQAPGPAPTRSP | Negative |
| Q9M6E9 | SATPASYNQFIDALRERLTG | Negative |
| Q9M6E9 | FQDPIKFTTGSATPASYNQF | Negative |
| Q9M6E9 | GNAYYQAQFQDPIKFTTGS  | Negative |
| Q9M6E9 | QDPIKFTTGSATPASYNQFI | Negative |
| Q9M6E9 | QFQDPIKFTTGSATPASYNQ | Negative |
| Q9M6E9 | NAYYQAQFQDPIKFTTGS   | Negative |
| Q9M6E9 | HGNAYYQAQFQDPIKFTTGS | Negative |
| Q9M6E9 | FETTKNKLHGNAYYQAQFQD | Negative |
| Q9M6E9 | IKFTTGSATPASYNQFIDAL | Negative |
| Q9M6E9 | PIKFTTGSATPASYNQFIDA | Negative |
| Q9M6E9 | KNKLHGNAYYQAQFQDPIKF | Negative |
| Q9M6E9 | DPIKFTTGSATPASYNQFID | Negative |
| Q9M6E9 | TTGSATPASYNQFIDALRER | Negative |
| Q9M6E9 | NKLHGNAYYQAQFQDPIKFT | Negative |
| Q9M6E9 | KFTTGSATPASYNQFIDALR | Negative |
| Q9M6E9 | AQFQDPIKFTTGSATPASYN | Negative |
| Q9M6E9 | KLHGNAYYQAQFQDPIKFTT | Negative |
| Q9M6E9 | LHGNAYYQAQFQDPIKFTTG | Negative |
| Q9M6E9 | FTTGSATPASYNQFIDALRE | Negative |
| Q9M6E9 | GSATPASYNQFIDALRERLT | Negative |
| Q9M6E9 | YQAQFQDPIKFTTGSATPAS | Negative |
| Q9M6E9 | AYYQAQFQDPIKFTTGSATP | Negative |

|        |                       |          |
|--------|-----------------------|----------|
| Q9M6E9 | ETTKNKLHGNAYYQAQFQDP  | Negative |
| Q9M6E9 | YYQAQFQDPIKFTTGSATPA  | Negative |
| Q9M6E9 | QAQFQDPIKFTTGSATPASY  | Negative |
| Q9M6E9 | MKFETTKNKLHGNAYYQAQF  | Negative |
| Q9M6E9 | TTKNKLHGNAYYQAQFQDPI  | Negative |
| Q9M6E9 | TGSATPASYNQFIDALRERL  | Negative |
| Q9M6E9 | KFETTKNKLHGNAYYQAQFQ  | Negative |
| Q9N2D2 | FVVLLAVFALSQASGIVRIP  | Negative |
| Q9N2D2 | ASGIVRIPLHKGKSLRRALK  | Negative |
| Q9N2D2 | VLLAVFALSQASGIVRIPLH  | Negative |
| Q9N2D2 | SGIVRIPLHKGKSLRRALKE  | Negative |
| Q9N2D2 | LLAVFALSQASGIVRIPLHK  | Negative |
| Q9N2D2 | GFVVLLAVFALSQASGIVRI  | Negative |
| Q9N2D2 | KGKSLRRALKERGLLEDFLK  | Negative |
| Q9N2D2 | QASGIVRIPLHKGKSLRRAL  | Negative |
| Q9N2D2 | ALSQASGIVRIPLHKGKSLR  | Negative |
| Q9N2D2 | MRGFVVLLAVFALSQASGIV  | Negative |
| Q9N2D2 | FALSQASGIVRIPLHKGKSL  | Negative |
| Q9N2D2 | IVRIPLHKGKSLRRALKERG  | Negative |
| Q9N2D2 | HKGKSLRRALKERGLLEDFL  | Negative |
| Q9N2D2 | GKSLRRALKERGLLEDFLKN  | Negative |
| Q9N2D2 | GIVRIPLHKGKSLRRALKER  | Negative |
| Q9N2D2 | LAVFALSQASGIVRIPLHKG  | Negative |
| Q9N2D2 | RIPLHKGKSLRRALKERGLL  | Negative |
| Q9N2D2 | IPLHKGKSLRRALKERGLLE  | Negative |
| Q9N2D2 | LHKGKSLRRALKERGLLEDF  | Negative |
| Q9N2D2 | LSQASGIVRIPLHKGKSLRR  | Negative |
| Q9N2D2 | KSLRRALKERGLLEDFLKNH  | Negative |
| Q9N2D2 | SQASGIVRIPLHKGKSLRRA  | Negative |
| Q9N2D2 | VVLLAVFALSQASGIVRIPL  | Negative |
| Q9N2D2 | AVFALSQASGIVRIPLHKGK  | Negative |
| Q9N2D2 | VFALSQASGIVRIPLHKGKS  | Negative |
| Q9N2D2 | PLHKGKSLRRALKERGLLED  | Negative |
| Q9N2D2 | VRIPPLHKGKSLRRALKERGL | Negative |
| Q9N2D2 | LRRALKERGLLEDFLKNHQH  | Negative |
| Q9N2D2 | SLRRALKERGLLEDFLKNHQ  | Negative |
| Q9N2D3 | KVPLKKFKSIRETMKEKGLL  | Negative |
| Q9N2D3 | RETMKEKGLLWEFLKTHKHD  | Negative |
| Q9N2D3 | MKWMVVAFICLQLEATVVK   | Negative |
| Q9N2D3 | FKSIRETMKEKGLLWEFLKT  | Negative |
| Q9N2D3 | VAFICLQLEATVVKVPLKK   | Negative |
| Q9N2D3 | ICLQLEATVVKVPLKKFKS   | Negative |
| Q9N2D3 | EATVVKVPLKKFKSIRETMK  | Negative |
| Q9N2D3 | KKFKSIRETMKEKGLLWEFL  | Negative |
| Q9N2D3 | SIRETMKEKGLLWEFLKTHK  | Negative |
| Q9N2D3 | VVAFICLQLEATVVKVPLK   | Negative |

|        |                      |          |
|--------|----------------------|----------|
| Q9N2D3 | LKKFKSIRETMKEKGLLWEF | Negative |
| Q9N2D3 | KFKSIRETMKEKGLLWEFLK | Negative |
| Q9N2D3 | TVVKVPLKKFKSIRETMKEK | Negative |
| Q9N2D3 | LQLEATVVKVPLKKFKSIR  | Negative |
| Q9N2D3 | MVVAFICLQLEATVVKVPL  | Negative |
| Q9N2D3 | ATVVKVPLKKFKSIRETMKE | Negative |
| Q9N2D3 | PLKKFKSIRETMKEKGLLWE | Negative |
| Q9N2D3 | VPLKKFKSIRETMKEKGLLW | Negative |
| Q9N2D3 | LLEATVVKVPLKKFKSIRET | Negative |
| Q9N2D3 | WMVVAFICLQLEATVVKVP  | Negative |
| Q9N2D3 | VKVPLKKFKSIRETMKEKGL | Negative |
| Q9N2D3 | CLQLEATVVKVPLKKFKSI  | Negative |
| Q9N2D3 | KSIRETMKEKGLLWEFLKTH | Negative |
| Q9N2D3 | QLEATVVKVPLKKFKSIRE  | Negative |
| Q9N2D3 | VVKVPLKKFKSIRETMKEKG | Negative |
| Q9N2D3 | AFICLQLEATVVKVPLKKF  | Negative |
| Q9N2D3 | IRETMKEKGLLWEFLKTHKH | Negative |
| Q9N2D3 | LEATVVKVPLKKFKSIRETM | Negative |
| Q9N2D3 | FICLQLEATVVKVPLKKFK  | Negative |
| Q9N2I2 | LGPRMATLRRSQKKKIQEVP | Negative |
| Q9N2I2 | LLGPRMATLRRSQKKKIQEV | Negative |
| Q9N2I2 | KIQEVPPAVTTAPPGSRDFV | Negative |
| Q9N2I2 | FLCLVLLGPRMATLRRSQKK | Negative |
| Q9N2I2 | VLLGPRMATLRRSQKKKIQE | Negative |
| Q9N2I2 | QKKKIQEVPPAVTTAPPGSR | Negative |
| Q9N2I2 | PRMATLRRSQKKKIQEVPPA | Negative |
| Q9N2I2 | KKIQEVPPAVTTAPPGSRDF | Negative |
| Q9N2I2 | EVPPAVTTAPPGSRDFVFDL | Negative |
| Q9N2I2 | RSQKKKIQEVPPAVTTAPPG | Negative |
| Q9N2I2 | CLFLCLVLLGPRMATLRRSQ | Negative |
| Q9N2I2 | VPPAVTTAPPGSRDFVFDLY | Negative |
| Q9N2I2 | SQKKKIQEVPPAVTTAPPGS | Negative |
| Q9N2I2 | QEVPPAVTTAPPGSRDFVFD | Negative |
| Q9N2I2 | TLRRSQKKKIQEVPPAVTTA | Negative |
| Q9N2I2 | MATLRRSQKKKIQEVPPAVT | Negative |
| Q9N2I2 | LRRSQKKKIQEVPPAVTTAP | Negative |
| Q9N2I2 | LCLFLCLVLLGPRMATLRRS | Negative |
| Q9N2I2 | IQEVPPAVTTAPPGSRDFVF | Negative |
| Q9N2I2 | LCLVLLGPRMATLRRSQKKK | Negative |
| Q9N2I2 | RMATLRRSQKKKIQEVPPAV | Negative |
| Q9N2I2 | KKKIQEVPPAVTTAPPGSRD | Negative |
| Q9N2I2 | RLCLFLCLVLLGPRMATLRR | Negative |
| Q9N2I2 | LVLLGPRMATLRRSQKKKIQ | Negative |
| Q9N2I2 | ATLRRSQKKKIQEVPPAVTT | Negative |
| Q9N2I2 | GPRMATLRRSQKKKIQEVPP | Negative |
| Q9N2I2 | MRLCLFLCLVLLGPRMATLR | Negative |

|        |                       |          |
|--------|-----------------------|----------|
| Q9N2I2 | CLVLLGPRMATLRRSQKKKI  | Negative |
| Q9N2I2 | RRSQKKKIQEVPPAVTTAPP  | Negative |
| Q9NAX4 | CLVFAYVNASYDACYNVVC   | Negative |
| Q9NAX4 | CYNVVCPSNYQCRAEGDQAY  | Negative |
| Q9NAX4 | YDACYNVVCPSNYQCRAEGD  | Negative |
| Q9NAX4 | NASYDACYNVVCPSNYQCRA  | Negative |
| Q9NAX4 | YVNASYDACYNVVCPSNYQC  | Negative |
| Q9NAX4 | LVCLVFAYVNASYDACYNV   | Negative |
| Q9NAX4 | MKVLLLLLVCLVFAYVNASYD | Negative |
| Q9NAX4 | DACYNVVCPSNYQCRAEGDQ  | Negative |
| Q9NAX4 | CPSNYQCRAEGDQAYCVPEH  | Negative |
| Q9NAX4 | VCLVFAYVNASYDACYNVVC  | Negative |
| Q9NAX4 | SYDACYNVVCPSNYQCRAEG  | Negative |
| Q9NAX4 | LVFAYVNASYDACYNVVCPS  | Negative |
| Q9NAX4 | KVLLLLLVCLVFAYVNASYDA | Negative |
| Q9NAX4 | NVVCPSNYQCRAEGDQAYCV  | Negative |
| Q9NAX4 | LLLLVCLVFAYVNASYDACY  | Negative |
| Q9NAX4 | VFAYVNASYDACYNVVCPSN  | Negative |
| Q9NAX4 | FAYVNASYDACYNVVCPSNY  | Negative |
| Q9NAX4 | ACYNVVCPSNYQCRAEGDQA  | Negative |
| Q9NAX4 | AYVNASYDACYNVVCPSNYQ  | Negative |
| Q9NAX4 | VVCPSNYQCRAEGDQAYCVP  | Negative |
| Q9NAX4 | VNASYDACYNVVCPSNYQCR  | Negative |
| Q9NAX4 | LLVCLVFAYVNASYDACYNV  | Negative |
| Q9NAX4 | YNVVCPSNYQCRAEGDQAYC  | Negative |
| Q9NAX4 | LLLVCLVFAYVNASYDACYN  | Negative |
| Q9NAX4 | NYQCRAEGDQAYCVPEHHEY  | Negative |
| Q9NAX4 | VCPSPNYQCRAEGDQAYCVPE | Negative |
| Q9NAX4 | SNYQCRAEGDQAYCVPEHHE  | Negative |
| Q9NAX4 | ASYDACYNVVCPSNYQCRAE  | Negative |
| Q9NAX4 | PSNYQCRAEGDQAYCVPEHH  | Negative |
| Q9NBG9 | DVKCFASSECWTACKKVTGS  | Negative |
| Q9NBG9 | SILLVALIICSISICTEAFG  | Negative |
| Q9NBG9 | LIICSISICTEAFGLIDVKC  | Negative |
| Q9NBG9 | CFASSECWTACKKVTGSGQG  | Negative |
| Q9NBG9 | AFGLIDVKCFASSECWTACK  | Negative |
| Q9NBG9 | EAFGLIDVKCFASSECWTAC  | Negative |
| Q9NBG9 | IDVKCFASSECWTACKKVTG  | Negative |
| Q9NBG9 | SICTEAFGLIDVKCFASSEC  | Negative |
| Q9NBG9 | IICSISICTEAFGLIDVKCF  | Negative |
| Q9NBG9 | VALIICSISICTEAFGLIDV  | Negative |
| Q9NBG9 | KCFASSECWTACKKVTGSGQ  | Negative |
| Q9NBG9 | MKIFSILLVALIICSISICT  | Negative |
| Q9NBG9 | ICSISICTEAFGLIDVKCFA  | Negative |
| Q9NBG9 | ISICTEAFGLIDVKCFASSE  | Negative |
| Q9NBG9 | ILLVALIICSISICTEAFGL  | Negative |

|        |                      |          |
|--------|----------------------|----------|
| Q9NBG9 | FGLIDVKCFASSECWTACKK | Negative |
| Q9NBG9 | TEAFGLIDVKCFASSECWTA | Negative |
| Q9NBG9 | CTEAFGLIDVKCFASSECWT | Negative |
| Q9NBG9 | ALIICSISICTEAFGLIDVK | Negative |
| Q9NBG9 | FSILLVALIICSISICTEAF | Negative |
| Q9NBG9 | ICTEAFGLIDVKCFASSECW | Negative |
| Q9NBG9 | GLIDVKCFASSECWTACKKV | Negative |
| Q9NBG9 | CSISICTEAFGLIDVKCFAS | Negative |
| Q9NBG9 | LLVALIICSISICTEAFGLI | Negative |
| Q9NBG9 | VKCFASSECWTACKKVTGSG | Negative |
| Q9NBG9 | IFSILLVALIICSISICTEA | Negative |
| Q9NBG9 | LIDVKCFASSECWTACKKVT | Negative |
| Q9NBG9 | KIFSILLVALIICSISICTE | Negative |
| Q9NBG9 | SISICTEAFGLIDVKCFASS | Negative |
| Q9NBW2 | TKKSGYPTDHEGCKNWCVLN | Negative |
| Q9NBW2 | AALLLVIFSLMLIGVLTKK  | Negative |
| Q9NBW2 | FSLMLIGVLTKKSGYPTDHE | Negative |
| Q9NBW2 | YPTDHEGCKNWCVLNHSCGI | Negative |
| Q9NBW2 | IGVLTKKSGYPTDHEGCKNW | Negative |
| Q9NBW2 | MKAALLLVIFSLMLIGVLT  | Negative |
| Q9NBW2 | SLMLIGVLTKKSGYPTDHEG | Negative |
| Q9NBW2 | KAALLLVIFSLMLIGVLT   | Negative |
| Q9NBW2 | MLIGVLTKKSGYPTDHEGCK | Negative |
| Q9NBW2 | GCKNWCVLNHSCGILCEGYG | Negative |
| Q9NBW2 | EGCKNWCVLNHSCGILCEGY | Negative |
| Q9NBW2 | VIFSLMLIGVLTKKSGYPTD | Negative |
| Q9NBW2 | LLVIFSLMLIGVLTKKSGYP | Negative |
| Q9NBW2 | SGYPTDHEGCKNWCVLNHSC | Negative |
| Q9NBW2 | PTDHEGCKNWCVLNHSCGIL | Negative |
| Q9NBW2 | GVLTKKSGYPTDHEGCKNWC | Negative |
| Q9NBW2 | KSGYPTDHEGCKNWCVLNHS | Negative |
| Q9NBW2 | IFSLMLIGVLTKKSGYPTDH | Negative |
| Q9NBW2 | KKSGYPTDHEGCKNWCVLNH | Negative |
| Q9NBW2 | LIGVLTKKSGYPTDHEGCKN | Negative |
| Q9NBW2 | DHEGCKNWCVLNHSCGILCE | Negative |
| Q9NBW2 | LVIFSLMLIGVLTKKSGYPT | Negative |
| Q9NBW2 | LTKKSGYPTDHEGCKNWCVL | Negative |
| Q9NBW2 | ALLLVIFSLMLIGVLT     | Negative |
| Q9NBW2 | TDHEGCKNWCVLNHSCGILC | Negative |
| Q9NBW2 | LMLIGVLTKKSGYPTDHEGC | Negative |
| Q9NBW2 | GYPTDHEGCKNWCVLNHSCG | Negative |
| Q9NBW2 | HEGCKNWCVLNHSCGILCEG | Negative |
| Q9NBW2 | VLTKKSGYPTDHEGCKNWCV | Negative |
| Q9NBW4 | ENTECPRACPGEYEFDEDGC | Negative |
| Q9NBW4 | NTECPRACPGEYEFDEDGCN | Negative |
| Q9NBW4 | CENTECPRACPGEYEFDEDG | Negative |

|        |                       |          |
|--------|-----------------------|----------|
| Q9NBW4 | PRACPGEYEFDEDGCNTCLC  | Negative |
| Q9NBW4 | SVAFGDCENTECPRACPGY   | Negative |
| Q9NBW4 | LLLVACFCSVAFGDCENTEC  | Negative |
| Q9NBW4 | TECPRACPGEYEFDEDGCNT  | Negative |
| Q9NBW4 | RGLAVLLL VACFCSVAFGDC | Negative |
| Q9NBW4 | CFCSVAFGDCENTECPRACP  | Negative |
| Q9NBW4 | MRGLAVLLL VACFCSVAFGD | Negative |
| Q9NBW4 | CSVAFGDCENTECPRACPGE  | Negative |
| Q9NBW4 | VLLL VACFCSVAFGDCENTE | Negative |
| Q9NBW4 | FCSVAFGDCENTECPRACPG  | Negative |
| Q9NBW4 | VAFGDCENTECPRACPGEYE  | Negative |
| Q9NBW4 | VACFCSVAFGDCENTECPRA  | Negative |
| Q9NBW4 | FGDCENTECPRACPGEYFD   | Negative |
| Q9NBW4 | ACPGEYEFDEDGCNTCLCKG  | Negative |
| Q9NBW4 | ECPRACPGEYEFDEDGCNTC  | Negative |
| Q9NBW4 | LAVLLL VACFCSVAFGDCEN | Negative |
| Q9NBW4 | LL VACFCSVAFGDCENTECP | Negative |
| Q9NBW4 | CPGEYEFDEDGCNTCLCKGC  | Negative |
| Q9NBW4 | GDCENTECPRACPGEYEFDE  | Negative |
| Q9NBW4 | GLAVLLL VACFCSVAFGDCE | Negative |
| Q9NBW4 | AFGDCENTECPRACPGEYEF  | Negative |
| Q9NBW4 | DCENTECPRACPGEYEFDED  | Negative |
| Q9NBW4 | RACPGEYEFDEDGCNTCLCK  | Negative |
| Q9NBW4 | CPRACPGEYEFDEDGCNTCL  | Negative |
| Q9NBW4 | LVACFCSVAFGDCENTECPR  | Negative |
| Q9NBW4 | ACFCSVAFGDCENTECPRAC  | Negative |
| Q9NII5 | AQFTNVSCSASSQCWPVCKK  | Negative |
| Q9NII5 | FLLLLAIVICSIGWTEAQFT  | Negative |
| Q9NII5 | TEAQFTNVSCSASSQCWPVC  | Negative |
| Q9NII5 | EAQFTNVSCSASSQCWPVCK  | Negative |
| Q9NII5 | SASSQCWPVCKKLFGTYRGK  | Negative |
| Q9NII5 | FTNVSCSASSQCWPVCKKLF  | Negative |
| Q9NII5 | ICSIGWTEAQFTNVSCSASS  | Negative |
| Q9NII5 | LLAIVICSIGWTEAQFTNVS  | Negative |
| Q9NII5 | SFLLLLAIVICSIGWTEAQF  | Negative |
| Q9NII5 | SCSASSQCWPVCKKLFGTYR  | Negative |
| Q9NII5 | GWTEAQFTNVSCSASSQCWP  | Negative |
| Q9NII5 | ASSQCWPVCKKLFGTYRGKC  | Negative |
| Q9NII5 | ISFLLLLAIVICSIGWTEAQ  | Negative |
| Q9NII5 | SIGWTEAQFTNVSCSASSQC  | Negative |
| Q9NII5 | LLLLAIVICSIGWTEAQFTN  | Negative |
| Q9NII5 | CSIGWTEAQFTNVSCSASSQ  | Negative |
| Q9NII5 | CSASSQCWPVCKKLFGTYRG  | Negative |
| Q9NII5 | NVSCSASSQCWPVCKKLFGT  | Negative |
| Q9NII5 | WTEAQFTNVSCSASSQCWPV  | Negative |
| Q9NII5 | QFTNVSCSASSQCWPVCKKL  | Negative |

|        |                      |          |
|--------|----------------------|----------|
| Q9NII5 | IGWTEAQFTNVSCSASSQCW | Negative |
| Q9NII5 | VICSIGWTEAQFTNVSCSAS | Negative |
| Q9NII5 | AIVICSIGWTEAQFTNVSCS | Negative |
| Q9NII5 | LAIVICSIGWTEAQFTNVSC | Negative |
| Q9NII5 | TNVSCSASSQCWPVCKKLFG | Negative |
| Q9NII5 | KISFLLLLAIVICSIGWTEA | Negative |
| Q9NII5 | IVICSIGWTEAQFTNVSCSA | Negative |
| Q9NII5 | VSCSASSQCWPVCKKLFGTY | Negative |
| Q9NII5 | MKISFLLLLAIVICSIGWTE | Negative |
| Q9NII7 | VKCKHSGQCLKPCKDAGMRF | Negative |
| Q9NII7 | IHGVGINVKCKHSGQCLKPC | Negative |
| Q9NII7 | VLITLFICSMIIGIHGVGIN | Negative |
| Q9NII7 | IIGIHGVGINVKCKHSGQCL | Negative |
| Q9NII7 | IGIHGVGINVKCKHSGQCLK | Negative |
| Q9NII7 | CKHSGQCLKPCKDAGMRFGK | Negative |
| Q9NII7 | AVLITLFICSMIIGIHGVGI | Negative |
| Q9NII7 | KVFFAVLITLFICSMIIGIH | Negative |
| Q9NII7 | FICSMIIGIHGVGINVKCKH | Negative |
| Q9NII7 | VGINVKCKHSGQCLKPCKDA | Negative |
| Q9NII7 | TLFICSMIIGIHGVGINVKC | Negative |
| Q9NII7 | KHSGQCLKPCKDAGMRFGKC | Negative |
| Q9NII7 | GINVKCKHSGQCLKPCKDAG | Negative |
| Q9NII7 | ICSMIIGIHGVGINVKCKHS | Negative |
| Q9NII7 | GIHGVGINVKCKHSGQCLKP | Negative |
| Q9NII7 | GVGINVKCKHSGQCLKPCKD | Negative |
| Q9NII7 | FFAVLITLFICSMIIGIHGV | Negative |
| Q9NII7 | INVKCKHSGQCLKPCKDAGM | Negative |
| Q9NII7 | ITLFICSMIIGIHGVGINVK | Negative |
| Q9NII7 | VFFAVLITLFICSMIIGIHG | Negative |
| Q9NII7 | LFICSMIIGIHGVGINVKCK | Negative |
| Q9NII7 | NVKCKHSGQCLKPCKDAGMR | Negative |
| Q9NII7 | SMIIGIHGVGINVKCKHSGQ | Negative |
| Q9NII7 | KCKHSGQCLKPCKDAGMRFG | Negative |
| Q9NII7 | CSMIIGIHGVGINVKCKHSG | Negative |
| Q9NII7 | HGVGINVKCKHSGQCLKPCK | Negative |
| Q9NII7 | MKVFFAVLITLFICSMIIGI | Negative |
| Q9NII7 | MIIGIHGVGINVKCKHSGQC | Negative |
| Q9NII7 | FAVLITLFICSMIIGIHGVG | Negative |
| Q9NJP7 | ISDPVVEAVGCEECPMHCKG | Negative |
| Q9NJP7 | VVEAVGCEECPMHCKGKNAK | Negative |
| Q9NJP7 | VLAMNVMMAIISDPVVEAVG | Negative |
| Q9NJP7 | LVLIVLAMNVMMAIISDPVV | Negative |
| Q9NJP7 | AVGCEECPMHCKGKNAKPTC | Negative |
| Q9NJP7 | LAMNVMMAIISDPVVEAVGC | Negative |
| Q9NJP7 | LFTLVLIVLAMNVMMAIISD | Negative |
| Q9NJP7 | PVVEAVGCEECPMHCKGKNA | Negative |



|        |                       |          |
|--------|-----------------------|----------|
| Q9NJP7 | MSRLFTLV LIVLAMNVMMAI | Negative |
| Q9NJP7 | EAVGCEECPMHCKGKNAKPT  | Negative |
| Q9NJP7 | LIVLAMNVMMAIISDPVVEA  | Negative |
| Q9NJP7 | NVMMAIISDPVVEAVGCEEC  | Negative |
| Q9NJP7 | AMNVMMAIISDPVVEAVGCE  | Negative |
| Q9NJP7 | MMAIISDPVVEAVGCEECPM  | Negative |
| Q9NJP7 | VMMAIISDPVVEAVGCEECP  | Negative |
| Q9NJP7 | AIISDPVVEAVGCEECPMHC  | Negative |
| Q9NJP7 | SRLFTLV LIVLAMNVMMAI  | Negative |
| Q9NJP7 | SDPVVEAVGCEECPMHCKGK  | Negative |
| Q9NJP7 | RLFTLV LIVLAMNVMMAIIS | Negative |
| Q9NJP7 | VGCEECPMHCKGKNAKPTCD  | Negative |
| Q9NJP7 | IVLAMNVMMAIISDPVVEAV  | Negative |
| Q9NJP7 | TLVLIVLAMNVMMAIISDPV  | Negative |
| Q9NJP7 | FTLV LIVLAMNVMMAIISDP | Negative |
| Q9NJP7 | MAIISDPVVEAVGCEECPMH  | Negative |
| Q9NJP7 | GCEECPMHCKGKNAKPTCDD  | Negative |
| Q9NJP7 | DPVVEAVGCEECPMHCKGKN  | Negative |
| Q9NJP7 | IISDPVVEAVGCEECPMHCK  | Negative |
| Q9NJP7 | VLIVLAMNVMMAIISDPVVE  | Negative |
| Q9NJP7 | VEAVGCEECPMHCKGKNAKP  | Negative |
| Q9NL38 | LIPLCHCASMHRHDHYMDMD  | Negative |
| Q9NL38 | IPLCHCASMHRHDHYMDMDQ  | Negative |
| Q9NL38 | HLTALLVLIPLCHCASMHRH  | Negative |
| Q9NL38 | VLIPLCHCASMHRHDHYMDM  | Negative |
| Q9NL38 | HDHYMDMDQTYPNGLGYCEP  | Negative |
| Q9NL38 | SMHRHDHYMDMDQTYPNGLG  | Negative |
| Q9NL38 | LCHCASMHRHDHYMDMDQTY  | Negative |
| Q9NL38 | WRMTTLLHLTALLVLIPLCH  | Negative |
| Q9NL38 | PLCHCASMHRHDHYMDMDQT  | Negative |
| Q9NL38 | LTALLVLIPLCHCASMHRHD  | Negative |
| Q9NL38 | MTTLLHLTALLVLIPLCHCA  | Negative |
| Q9NL38 | HYMDMDQTYPNGLGYCEPSG  | Negative |
| Q9NL38 | ASMHRHDHYMDMDQTYPNGL  | Negative |
| Q9NL38 | LVIPLCHCASMHRHDHYMD   | Negative |
| Q9NL38 | RHDHYMDMDQTYPNGLGYCE  | Negative |
| Q9NL38 | ALLVLIPLCHCASMHRHDHY  | Negative |
| Q9NL38 | RMTTLLHLTALLVLIPLCHC  | Negative |
| Q9NL38 | TTLLHLTALLVLIPLCHCAS  | Negative |
| Q9NL38 | CHCASMHRHDHYMDMDQTYP  | Negative |
| Q9NL38 | CASMHRHDHYMDMDQTYPNG  | Negative |
| Q9NL38 | LLHLTALLVLIPLCHCASM   | Negative |
| Q9NL38 | TLLHLTALLVLIPLCHCASM  | Negative |
| Q9NL38 | LLVLIPLCHCASMHRHDHYM  | Negative |
| Q9NL38 | HCASMHRHDHYMDMDQTYPN  | Negative |
| Q9NL38 | TALLVLIPLCHCASMHRHDH  | Negative |

|        |                       |          |
|--------|-----------------------|----------|
| Q9NL38 | MHRHDHYMDMDQTYPNGLGY  | Negative |
| Q9NL38 | HRHDHYMDMDQTYPNGLGYC  | Negative |
| Q9NL38 | DHYMDMDQTYPNGLGYCEPS  | Negative |
| Q9NL38 | MWRMTTLLHLTALLVLIPLC  | Negative |
| Q9NL39 | PVAAYQRCSRYWYSWLPYDI  | Negative |
| Q9NL39 | LSRPVAAAYQRCSRYWYSWLP | Negative |
| Q9NL39 | HLSRPVAAAYQRCSRYWYSWL | Negative |
| Q9NL39 | VAAAYQRCSRYWYSWLPYDIE | Negative |
| Q9NL39 | AAAYQRCSRYWYSWLPYDIER | Negative |
| Q9NL39 | IAALVLLGICHLSRPVAAAYQ | Negative |
| Q9NL39 | RLTIAALVLLGICHLSRPVA  | Negative |
| Q9NL39 | MACTLRLTIAALVLLGICHL  | Negative |
| Q9NL39 | QRCSRYWYSWLPYDIERDRY  | Negative |
| Q9NL39 | SRPVAAAYQRCSRYWYSWLPY | Negative |
| Q9NL39 | AYQRCSRYWYSWLPYDIERD  | Negative |
| Q9NL39 | RPVAAAYQRCSRYWYSWLPYD | Negative |
| Q9NL39 | RCSRYWYSWLPYDIERDRYD  | Negative |
| Q9NL39 | ICHLSRPVAAAYQRCSRYWYS | Negative |
| Q9NL39 | CHLSRPVAAAYQRCSRYWYSW | Negative |
| Q9NL39 | LVLLGICHLSRPVAAAYQRCS | Negative |
| Q9NL39 | ACTLRLTIAALVLLGICHLS  | Negative |
| Q9NL39 | GICHLSRPVAAAYQRCSRYWY | Negative |
| Q9NL39 | LLGICHLSRPVAAAYQRCSRY | Negative |
| Q9NL39 | TIAALVLLGICHLSRPVAAAY | Negative |
| Q9NL39 | CTLRLTIAALVLLGICHLSR  | Negative |
| Q9NL39 | AALVLLGICHLSRPVAAAYQR | Negative |
| Q9NL39 | CSRYWYSWLPYDIERDRYDD  | Negative |
| Q9NL39 | YQRCSRYWYSWLPYDIERDR  | Negative |
| Q9NL39 | LRLTIAALVLLGICHLSRPV  | Negative |
| Q9NL39 | LGICHLSRPVAAAYQRCSRYW | Negative |
| Q9NL39 | TLRLTIAALVLLGICHLSRP  | Negative |
| Q9NL39 | LTIAALVLLGICHLSRPVAA  | Negative |
| Q9NL39 | VLLGICHLSRPVAAAYQRCSR | Negative |
| Q9NRC9 | MDRLASKKLCADDECVTIS   | Negative |
| Q9NRC9 | LASKKLCADDECVTISLAS   | Negative |
| Q9NRC9 | LLFLPGLVAVCAVHGIFMDR  | Negative |
| Q9NRC9 | CAVHGIFMDRLASKKLCADD  | Negative |
| Q9NRC9 | LFLPGLVAVCAVHGIFMDRL  | Negative |
| Q9NRC9 | FMDRLASKKLCADDECVTI   | Negative |
| Q9NRC9 | VHGIFMDRLASKKLCADDEC  | Negative |
| Q9NRC9 | RLASKKLCADDECVTISLA   | Negative |
| Q9NRC9 | LPGLVAVCAVHGIFMDRLAS  | Negative |
| Q9NRC9 | FLPGLVAVCAVHGIFMDRLA  | Negative |
| Q9NRC9 | HGIFMDRLASKKLCADDEC   | Negative |
| Q9NRC9 | VAVCAVHGIFMDRLASKKLC  | Negative |
| Q9NRC9 | GIFMDRLASKKLCADDEC    | Negative |

|        |                       |          |
|--------|-----------------------|----------|
| Q9NRC9 | LLLFLPGLVAVCAVHGIFMD  | Negative |
| Q9NRC9 | ARILLFLPGLVAVCAVHGI   | Negative |
| Q9NRC9 | PGLVAVCAVHGIFMDRLASK  | Negative |
| Q9NRC9 | KKLCADDECVTISLASAQE   | Negative |
| Q9NRC9 | ASKKLCADDECVTISLASA   | Negative |
| Q9NRC9 | IFMDRLASKKLCADDECVT   | Negative |
| Q9NRC9 | SKKLCADDECVTISLASAQ   | Negative |
| Q9NRC9 | VCAVHGIFMDRLASKKLCAD  | Negative |
| Q9NRC9 | GLVAVCAVHGIFMDRLASKK  | Negative |
| Q9NRC9 | KLCADDECVTISLASAQED   | Negative |
| Q9NRC9 | MARILLFLPGLVAVCAVHG   | Negative |
| Q9NRC9 | DRLASKKLCADDECVTISL   | Negative |
| Q9NRC9 | AVCAVHGIFMDRLASKKLCA  | Negative |
| Q9NRC9 | AVHGIFMDRLASKKLCADDE  | Negative |
| Q9NRC9 | ILLFLPGLVAVCAVHGIFM   | Negative |
| Q9NRC9 | LVAVCAVHGIFMDRLASKKL  | Negative |
| Q9NRR1 | GAPAAPPTPTCYSRMRALS   | Negative |
| Q9NRR1 | LLLLLAGAAPAPPTPTCYS   | Negative |
| Q9NRR1 | VLLLLLAGAAPAPPTPTCY   | Negative |
| Q9NRR1 | YSRMRALSQEITRDFNLLQV  | Negative |
| Q9NRR1 | PAAPPTPTCYSRMRALSQE   | Negative |
| Q9NRR1 | PGPLPVLLLLLAGAAPAPPT  | Negative |
| Q9NRR1 | LLAGAAPAPPTPTCYSRMR   | Negative |
| Q9NRR1 | ARPTPTCYSRMRALSQEIT   | Negative |
| Q9NRR1 | AAPPTPTCYSRMRALSQEI   | Negative |
| Q9NRR1 | AGAAPAPPTPTCYSRMRAL   | Negative |
| Q9NRR1 | PTCYSRMRALSQEITRDFNL  | Negative |
| Q9NRR1 | PTPTPTCYSRMRALSQEITRD | Negative |
| Q9NRR1 | MRTPGPLPVLLLLLAGAPAA  | Negative |
| Q9NRR1 | LLLAGAAPAPPTPTCYSRM   | Negative |
| Q9NRR1 | PLPVLLLLLAGAAPAPPTPP  | Negative |
| Q9NRR1 | TPPTCYSRMRALSQEITRDF  | Negative |
| Q9NRR1 | SRMRALSQEITRDFNLLQVS  | Negative |
| Q9NRR1 | GPLPVLLLLLAGAAPAPPTP  | Negative |
| Q9NRR1 | RTPGPLPVLLLLLAGAAPAR  | Negative |
| Q9NRR1 | LAGAAPAPPTPTCYSRMRA   | Negative |
| Q9NRR1 | CYSRMRALSQEITRDFNLLQ  | Negative |
| Q9NRR1 | PPTCYSRMRALSQEITRDFN  | Negative |
| Q9NRR1 | LLLLAGAAPAPPTPTCYSR   | Negative |
| Q9NRR1 | TPGPLPVLLLLLAGAAPARP  | Negative |
| Q9NRR1 | TCYSRMRALSQEITRDFNLL  | Negative |
| Q9NRR1 | RPTPTPTCYSRMRALSQEITR | Negative |
| Q9NRR1 | LPVLLLLLAGAAPAPPTPT   | Negative |
| Q9NRR1 | APAAPPTPTPTCYSRMRALSQ | Negative |
| Q9NRR1 | RMRALSQEITRDFNLLQVSE  | Negative |
| Q9NSA1 | GACQAHPIPDSSPLLQFGGQ  | Negative |

|        |                       |          |
|--------|-----------------------|----------|
| Q9NSA1 | LAGLLLGACQAHPIPDSSPL  | Negative |
| Q9NSA1 | EHSGLWVSVLAGLLLGACQA  | Negative |
| Q9NSA1 | LWVSVLAGLLLGACQAHPIP  | Negative |
| Q9NSA1 | ACQAHPIPDSSPLLQFGGQV  | Negative |
| Q9NSA1 | AHPIPDSSPLLQFGGQVRQR  | Negative |
| Q9NSA1 | MDSDETGFHESGLWVSVLAG  | Negative |
| Q9NSA1 | LLLGACQAHPIPDSSPLLQF  | Negative |
| Q9NSA1 | ETGFHESGLWVSVLAGLLLG  | Negative |
| Q9NSA1 | GLLLGACQAHPIPDSSPLLQ  | Negative |
| Q9NSA1 | CQAHPIPDSSPLLQFGGQVR  | Negative |
| Q9NSA1 | AGLLLGACQAHPIPDSSPLL  | Negative |
| Q9NSA1 | HPIPDSSPLLQFGGQVRQRY  | Negative |
| Q9NSA1 | DETGFHESGLWVSVLAGLLL  | Negative |
| Q9NSA1 | LLGACQAHPIPDSSPLLQFG  | Negative |
| Q9NSA1 | FEHSGLWVSVLAGLLLGACQ  | Negative |
| Q9NSA1 | SGLWVSVLAGLLLGACQAH   | Negative |
| Q9NSA1 | VLAGLLLGACQAHPIPDSSP  | Negative |
| Q9NSA1 | DSDETGFHESGLWVSVLAGL  | Negative |
| Q9NSA1 | VSVLAGLLLGACQAHPIPD   | Negative |
| Q9NSA1 | HSGLWVSVLAGLLLGACQAH  | Negative |
| Q9NSA1 | TGFHESGLWVSVLAGLLGA   | Negative |
| Q9NSA1 | LGACQAHPIPDSSPLLQFGG  | Negative |
| Q9NSA1 | GLWVSVLAGLLLGACQAHPI  | Negative |
| Q9NSA1 | SVLAGLLLGACQAHPIPDSS  | Negative |
| Q9NSA1 | GFEHSGLWVSVLAGLLLGAC  | Negative |
| Q9NSA1 | QAHPIPDSSPLLQFGGQVRQ  | Negative |
| Q9NSA1 | SDETGFHESGLWVSVLAGLL  | Negative |
| Q9NSA1 | PIPDSSPLLQFGGQVRQRYL  | Negative |
| Q9NTU7 | LLVLTLPGLPVWAQNDTEPI  | Negative |
| Q9NTU7 | LPGLPVWAQNDTEPIVLEGK  | Negative |
| Q9NTU7 | WAQNDTEPIVLEGKCLVVC   | Negative |
| Q9NTU7 | LVLTLPLGLPVWAQNDTEPIV | Negative |
| Q9NTU7 | AQNDTEPIVLEGKCLVVCDS  | Negative |
| Q9NTU7 | DTEPIVLEGKCLVVCDSNPA  | Negative |
| Q9NTU7 | NDTEPIVLEGKCLVVCDSNP  | Negative |
| Q9NTU7 | LSAVPAVLLVLTLPGLPVWA  | Negative |
| Q9NTU7 | SGRRALSAVPAVLLVLTLP   | Negative |
| Q9NTU7 | VLLVLTLPGLPVWAQNDTEP  | Negative |
| Q9NTU7 | LPVWAQNDTEPIVLEGKCLV  | Negative |
| Q9NTU7 | VPAVLLVLTLPGLPVWAQND  | Negative |
| Q9NTU7 | PVWAQNDTEPIVLEGKCLVV  | Negative |
| Q9NTU7 | PAVLLVLTLPGLPVWAQNDT  | Negative |
| Q9NTU7 | ALSAVPAVLLVLTLPGLPVW  | Negative |
| Q9NTU7 | GSGRRALSAVPAVLLVLTLP  | Negative |
| Q9NTU7 | AVPAVLLVLTLPGLPVWAQN  | Negative |
| Q9NTU7 | QNDTEPIVLEGKCLVVCDSN  | Negative |

|        |                      |          |
|--------|----------------------|----------|
| Q9NTU7 | MSGRRALSAVPAVLLVLT   | Negative |
| Q9NTU7 | RALSAVPAVLLVLTLPGLPV | Negative |
| Q9NTU7 | GLPVWAQNDTEPIVLEGKCL | Negative |
| Q9NTU7 | PGLPVWAQNDTEPIVLEGKC | Negative |
| Q9NTU7 | LTLPLPVWAQNDTEPIVLE  | Negative |
| Q9NTU7 | SAVPAVLLVLTLPGLPVWAQ | Negative |
| Q9NTU7 | VWAQNDTEPIVLEGKCLVVC | Negative |
| Q9NTU7 | GRRALSAVPAVLLVLTLPGL | Negative |
| Q9NTU7 | VLTLPGLPVWAQNDTEPIVL | Negative |
| Q9NTU7 | TLPGLPVWAQNDTEPIVLEG | Negative |
| Q9NTU7 | RRALSAVPAVLLVLTLPGLP | Negative |
| Q9NWM8 | FVTSLIGALIPPEVKIEVL  | Negative |
| Q9NWM8 | IGALIPPEVKIEVLQKPF   | Negative |
| Q9NWM8 | RLFLWNAVLTFLVTSIGAL  | Negative |
| Q9NWM8 | LFVTSLIGALIPPEVKIEV  | Negative |
| Q9NWM8 | ALIPPEVKIEVLQKPFICH  | Negative |
| Q9NWM8 | FLWNAVLTFLVTSIGALIP  | Negative |
| Q9NWM8 | EVLQKPFICHRKTKGGDML  | Negative |
| Q9NWM8 | NAVLTFLVTSIGALIPPE   | Negative |
| Q9NWM8 | LIPPEVKIEVLQKPFICHR  | Negative |
| Q9NWM8 | TSLIGALIPPEVKIEVLQK  | Negative |
| Q9NWM8 | VKIEVLQKPFICHRKTKGGD | Negative |
| Q9NWM8 | KIEVLQKPFICHRKTKGGDL | Negative |
| Q9NWM8 | SLIGALIPPEVKIEVLQKP  | Negative |
| Q9NWM8 | WNAVLTFLVTSIGALIPPE  | Negative |
| Q9NWM8 | AVLTFLVTSIGALIPPEV   | Negative |
| Q9NWM8 | LFLWNAVLTFLVTSIGALI  | Negative |
| Q9NWM8 | PEPEVKIEVLQKPFICHRKT | Negative |
| Q9NWM8 | LIGALIPPEVKIEVLQKPF  | Negative |
| Q9NWM8 | IPEPEVKIEVLQKPFICHRK | Negative |
| Q9NWM8 | IEVLQKPFICHRKTKGGDLM | Negative |
| Q9NWM8 | GALIPPEVKIEVLQKPFIC  | Negative |
| Q9NWM8 | PEVKIEVLQKPFICHRKTKG | Negative |
| Q9NWM8 | VLTFLVTSIGALIPPEVK   | Negative |
| Q9NWM8 | LTLFVTSIGALIPPEVKI   | Negative |
| Q9NWM8 | TLFVTSIGALIPPEVKIE   | Negative |
| Q9NWM8 | EVKIEVLQKPFICHRKTKGG | Negative |
| Q9NWM8 | MRLFLWNAVLTFLVTSIGA  | Negative |
| Q9NWM8 | EPEVKIEVLQKPFICHRKTK | Negative |
| Q9NWM8 | VTSIGALIPPEVKIEVLQ   | Negative |
| Q9NYY1 | SSLAFLLSAAFYLLWTPST  | Negative |
| Q9NYY1 | AAFYLLWTPSTGLKTLNLGS | Negative |
| Q9NYY1 | YLLWTPSTGLKTLNLGSCVI | Negative |
| Q9NYY1 | LKTLNLGSCVIATNLQEIRN | Negative |
| Q9NYY1 | KTLNLGSCVIATNLQEIRNG | Negative |
| Q9NYY1 | ASSLAFLLSAAFYLLWTPS  | Negative |

|        |                      |          |
|--------|----------------------|----------|
| Q9NYY1 | SAAFYLLWTPSTGLKTLNLG | Negative |
| Q9NYY1 | TPSTGLKTLNLGSCVIATNL | Negative |
| Q9NYY1 | SLAFSLLSAAFYLLWTPSTG | Negative |
| Q9NYY1 | TGLKTLNLGSCVIATNLQEI | Negative |
| Q9NYY1 | WTPSTGLKTLNLGSCVIATN | Negative |
| Q9NYY1 | LAFSLLSAAFYLLWTPSTGL | Negative |
| Q9NYY1 | LGSCVIATNLQEIRNGFSEI | Negative |
| Q9NYY1 | KASSLAFSLLSAAFYLLWTP | Negative |
| Q9NYY1 | FSLLSAAFYLLWTPSTGLKT | Negative |
| Q9NYY1 | AFYLLWTPSTGLKTLNLGSC | Negative |
| Q9NYY1 | LWTPSTGLKTLNLGSCVIAT | Negative |
| Q9NYY1 | FYLLWTPSTGLKTLNLGSCV | Negative |
| Q9NYY1 | TLNLGSCVIATNLQEIRNGF | Negative |
| Q9NYY1 | STGLKTLNLGSCVIATNLQE | Negative |
| Q9NYY1 | SLLSAAFYLLWTPSTGLKTL | Negative |
| Q9NYY1 | GLKTLNLGSCVIATNLQEIR | Negative |
| Q9NYY1 | AFSLLSAAFYLLWTPSTGLK | Negative |
| Q9NYY1 | LSAAFYLLWTPSTGLKTLNL | Negative |
| Q9NYY1 | LNLGSCVIATNLQEIRNGFS | Negative |
| Q9NYY1 | PSTGLKTLNLGSCVIATNLQ | Negative |
| Q9NYY1 | NLGSCVIATNLQEIRNGFSE | Negative |
| Q9NYY1 | MKASSLAFSLLSAAFYLLWT | Negative |
| Q9NYY1 | LLWTPSTGLKTLNLGSCVIA | Negative |
| Q9P0W0 | TLSLDCNLLNVHLRRVTWQN | Negative |
| Q9P0W0 | MGIFIAGTSLDCNLLNVHL  | Negative |
| Q9P0W0 | AGTSLDCNLLNVHLRRVTW  | Negative |
| Q9P0W0 | STKPDMIQKCLWLEILMGIF | Negative |
| Q9P0W0 | EILMGIFIAGTSLDCNLLN  | Negative |
| Q9P0W0 | IFIAGTSLDCNLLNVHLRR  | Negative |
| Q9P0W0 | LWLEILMGIFIAGTSLDCN  | Negative |
| Q9P0W0 | QKCLWLEILMGIFIAGTSL  | Negative |
| Q9P0W0 | ILMGIFIAGTSLDCNLLNV  | Negative |
| Q9P0W0 | DMIQKCLWLEILMGIFIAGT | Negative |
| Q9P0W0 | LEILMGIFIAGTSLDCNLL  | Negative |
| Q9P0W0 | LMGIFIAGTSLDCNLLNVH  | Negative |
| Q9P0W0 | MSTKPDMIQKCLWLEILMGI | Negative |
| Q9P0W0 | LDCNLLNVHLRRVTWQNLRH | Negative |
| Q9P0W0 | TKPDMIQKCLWLEILMGIFI | Negative |
| Q9P0W0 | GTLSDCNLLNVHLRRVTWQ  | Negative |
| Q9P0W0 | FIAGTSLDCNLLNVHLRRV  | Negative |
| Q9P0W0 | LSLDCNLLNVHLRRVTWQNL | Negative |
| Q9P0W0 | SLDCNLLNVHLRRVTWQNLR | Negative |
| Q9P0W0 | CLWLEILMGIFIAGTSLDC  | Negative |
| Q9P0W0 | KCLWLEILMGIFIAGTSLD  | Negative |
| Q9P0W0 | CNLLNVHLRRVTWQNLRHLS | Negative |
| Q9P0W0 | MIQKCLWLEILMGIFIAGTL | Negative |

|        |                       |          |
|--------|-----------------------|----------|
| Q9P0W0 | DCNLLNVHLRRVTWQNLRLHL | Negative |
| Q9P0W0 | PDMIQKCLWLEILMGIFIAG  | Negative |
| Q9P0W0 | IAGTSLDCNLLNVHLRRVT   | Negative |
| Q9P0W0 | IQKCLWLEILMGIFIAGTLS  | Negative |
| Q9P0W0 | GIFIAGTSLDCNLLNVHLR   | Negative |
| Q9P0W0 | KPDMIQKCLWLEILMGIFIA  | Negative |
| Q9P121 | RLLFLVPTGVPVRSGDATFP  | Negative |
| Q9P121 | GYLFLPWKCLVVVSLRLLFL  | Negative |
| Q9P121 | LPWKCLVVVSLRLLFLVPTG  | Negative |
| Q9P121 | CLVVVSLRLLFLVPTGVPVR  | Negative |
| Q9P121 | FLVPTGVPVRSGDATFPKAM  | Negative |
| Q9P121 | TGVPVRSGDATFPKAMDNT   | Negative |
| Q9P121 | PWKCLVVVSLRLLFLVPTGV  | Negative |
| Q9P121 | PTGVPVRSGDATFPKAMDNV  | Negative |
| Q9P121 | YLFLPWKCLVVVSLRLLFLV  | Negative |
| Q9P121 | VPVRSGDATFPKAMDNTVR   | Negative |
| Q9P121 | LFLVPTGVPVRSGDATFPA   | Negative |
| Q9P121 | GVPVRSGDATFPKAMDNTV   | Negative |
| Q9P121 | VPTGVPVRSGDATFPKAMD   | Negative |
| Q9P121 | MGVCGYLFLPWKCLVVVSLR  | Negative |
| Q9P121 | PVRSGDATFPKAMDNTVRQ   | Negative |
| Q9P121 | CGYLFLPWKCLVVVSLRLLF  | Negative |
| Q9P121 | VSLRLLFLVPTGVPVRSGDA  | Negative |
| Q9P121 | WKCLVVVSLRLLFLVPTGVP  | Negative |
| Q9P121 | LVPTGVPVRSGDATFPKAMD  | Negative |
| Q9P121 | LLFLVPTGVPVRSGDATFPK  | Negative |
| Q9P121 | VVSLRLLFLVPTGVPVRSGD  | Negative |
| Q9P121 | LVVVSLRLLFLVPTGVPVRS  | Negative |
| Q9P121 | LFLPWKCLVVVSLRLLFLVP  | Negative |
| Q9P121 | GVCGYLFLPWKCLVVVSLRL  | Negative |
| Q9P121 | KCLVVVSLRLLFLVPTGVPV  | Negative |
| Q9P121 | VCGYLFLPWKCLVVVSLRLL  | Negative |
| Q9P121 | FLPWKCLVVVSLRLLFLVPT  | Negative |
| Q9P121 | VVVSLRLLFLVPTGVPVRS   | Negative |
| Q9PTA1 | YTIPCEKTWGEYADYGCCYCG | Negative |
| Q9PTA1 | RYTIPCEKTWGEYADYGCCY  | Negative |
| Q9PTA1 | LINFMEMIRYTIPCEKTWGE  | Negative |
| Q9PTA1 | LLGAANIPPHPLNLINFMEM  | Negative |
| Q9PTA1 | PPHPLNLINFMEMIRYTIPC  | Negative |
| Q9PTA1 | NLINFMEMIRYTIPCEKTWG  | Negative |
| Q9PTA1 | LAVCVSLLGAANIPPHPLNL  | Negative |
| Q9PTA1 | PLNLINFMEMIRYTIPCEKT  | Negative |
| Q9PTA1 | PHPLNLINFMEMIRYTIPCE  | Negative |
| Q9PTA1 | INFMEMIRYTIPCEKTWGEY  | Negative |
| Q9PTA1 | SLLGAANIPPHPLNLINFME  | Negative |
| Q9PTA1 | TIPCEKTWGEYADYGCCYCGA | Negative |

|        |                      |          |
|--------|----------------------|----------|
| Q9PTA1 | IPPHPLNLINFMEMIRYTIP | Negative |
| Q9PTA1 | LGAANIPPHPLNLINFMEMI | Negative |
| Q9PTA1 | ANIPPHPLNLINFMEMIRYT | Negative |
| Q9PTA1 | MIRYTIPCEKTWGEYADYGC | Negative |
| Q9PTA1 | EMIRYTIPCEKTWGEYADYG | Negative |
| Q9PTA1 | FMEMIRYTIPCEKTWGEYAD | Negative |
| Q9PTA1 | AVCVSLLGAANIPPHPLNLI | Negative |
| Q9PTA1 | MEMIRYTIPCEKTWGEYADY | Negative |
| Q9PTA1 | IRYTIPCEKTWGEYADYGCY | Negative |
| Q9PTA1 | NFMEMIRYTIPCEKTWGEYA | Negative |
| Q9PTA1 | NIPPHPLNLINFMEMIRYTI | Negative |
| Q9PTA1 | GAANIPPHPLNLINFMEMIR | Negative |
| Q9PTA1 | HPLNLINFMEMIRYTIPCEK | Negative |
| Q9PTA1 | VSLLGAANIPPHPLNLINFM | Negative |
| Q9PTA1 | LNLINFMEMIRYTIPCEKTW | Negative |
| Q9PTA1 | VCVSLLGAANIPPHPLNLIN | Negative |
| Q9PTA1 | AANIPPHPLNLINFMEMIRY | Negative |
| Q9PTT2 | GLVIFFLFYGCHVAGATGK  | Negative |
| Q9PTT2 | MKGLVIFFLFYGCHVAGAT  | Negative |
| Q9PTT2 | QKTDTDYVTLKPTERVLNQI | Negative |
| Q9PTT2 | GCHVAGATGKTIMLFPQKTD | Negative |
| Q9PTT2 | GKTIMLFPQKTDTDYVTLKP | Negative |
| Q9PTT2 | IMLFPQKTDTDYVTLKPTER | Negative |
| Q9PTT2 | TGKTIMLFPQKTDTDYVTLK | Negative |
| Q9PTT2 | CLFYGCHVAGATGKTIMLFP | Negative |
| Q9PTT2 | AGATGKTIMLFPQKTDTDYV | Negative |
| Q9PTT2 | CHVAGATGKTIMLFPQKTD  | Negative |
| Q9PTT2 | MLFPQKTDTDYVTLKPTERV | Negative |
| Q9PTT2 | LVIFFLFYGCHVAGATGKT  | Negative |
| Q9PTT2 | GATGKTIMLFPQKTDTDYVT | Negative |
| Q9PTT2 | FCLFYGCHVAGATGKTIMLF | Negative |
| Q9PTT2 | IFFCLFYGCHVAGATGKTIM | Negative |
| Q9PTT2 | KTDTDYVTLKPTERVLNQIT | Negative |
| Q9PTT2 | FPQKTDTDYVTLKPTERVLN | Negative |
| Q9PTT2 | HVAGATGKTIMLFPQKTD   | Negative |
| Q9PTT2 | LFPQKTDTDYVTLKPTERV  | Negative |
| Q9PTT2 | YGCHVAGATGKTIMLFPQKT | Negative |
| Q9PTT2 | TIMLFPQKTDTDYVTLKPTE | Negative |
| Q9PTT2 | KGLVIFFLFYGCHVAGATG  | Negative |
| Q9PTT2 | FFCLFYGCHVAGATGKTIML | Negative |
| Q9PTT2 | PQKTDTDYVTLKPTERVLNQ | Negative |
| Q9PTT2 | ATGKTIMLFPQKTDTDYVTL | Negative |
| Q9PTT2 | LFYGCHVAGATGKTIMLFPQ | Negative |
| Q9PTT2 | FYGCHVAGATGKTIMLFPQK | Negative |
| Q9PTT2 | VAGATGKTIMLFPQKTDY   | Negative |
| Q9PTT2 | KTIMLFPQKTDTDYVTLKPT | Negative |



|        |                      |          |
|--------|----------------------|----------|
| Q9PUB7 | KTLLTLVVVTIVCLDFGYT  | Negative |
| Q9PUB7 | DFGYTIVCYKRHASDSQTTT | Negative |
| Q9PUB7 | IVCYKRHASDSQTTTCLSGI | Negative |
| Q9PUB7 | LLTLVVVTIVCLDFGYTIV  | Negative |
| Q9PUB7 | YTIVCYKRHASDSQTTTCLS | Negative |
| Q9PUB7 | SDSQTTTCLSGICYKKITRG | Negative |
| Q9PUB7 | LLTLVVVTIVCLDFGYTIVC | Negative |
| Q9PUB7 | RHASDSQTTTCLSGICYKKI | Negative |
| Q9PUB7 | ASDSQTTTCLSGICYKKITR | Negative |
| Q9PUB7 | KRHASDSQTTTCLSGICYKK | Negative |
| Q9PUB7 | VCYKRHASDSQTTTCLSGIC | Negative |
| Q9PUB7 | HASDSQTTTCLSGICYKKIT | Negative |
| Q9PUB7 | TLLTLVVVTIVCLDFGYTI  | Negative |
| Q9PUB7 | CYKRHASDSQTTTCLSGICY | Negative |
| Q9PUB7 | VVVTIVCLDFGYTIVCYKRH | Negative |
| Q9PUB7 | CLDFGYTIVCYKRHASDSQT | Negative |
| Q9PUB7 | LVVVTIVCLDFGYTIVCYKR | Negative |
| Q9PUB7 | TIVCYKRHASDSQTTTCLSG | Negative |
| Q9PUB7 | GYTIVCYKRHASDSQTTTCL | Negative |
| Q9PUB7 | MKTLLTLVVVTIVCLDFGY  | Negative |
| Q9PUB7 | VVTIVCLDFGYTIVCYKRHA | Negative |
| Q9PUB7 | TIVCLDFGYTIVCYKRHASD | Negative |
| Q9PUB7 | LDFGYTIVCYKRHASDSQTT | Negative |
| Q9PUB7 | FGYTIVCYKRHASDSQTTTC | Negative |
| Q9PUB7 | VTIVCLDFGYTIVCYKRHAS | Negative |
| Q9PUB7 | VCLDFGYTIVCYKRHASDSQ | Negative |
| Q9PUB7 | IVCLDFGYTIVCYKRHASDS | Negative |
| Q9PUB7 | LTLVVVTIVCLDFGYTIVCY | Negative |
| Q9PUB7 | YKRHASDSQTTTCLSGICYK | Negative |
| Q9PVW8 | LKLSLLSLLIATPGLLVSGA | Negative |
| Q9PVW8 | LIATPGLLVSGANMITCYGD | Negative |
| Q9PVW8 | ANMITCYGDVQKLHCETGLI | Negative |
| Q9PVW8 | CYGDVQKLHCETGLIIVKSS | Negative |
| Q9PVW8 | KLSLLSLLIATPGLLVSGAN | Negative |
| Q9PVW8 | ITCYGDVQKLHCETGLIIVK | Negative |
| Q9PVW8 | SLLSLLIATPGLLVSGANMI | Negative |
| Q9PVW8 | VSGANMITCYGDVQKLHCET | Negative |
| Q9PVW8 | SLLIATPGLLVSGANMITCY | Negative |
| Q9PVW8 | YGDVQKLHCETGLIIVKSSL | Negative |
| Q9PVW8 | LILKLSLLSLLIATPGLLV  | Negative |
| Q9PVW8 | TCYGDVQKLHCETGLIIVKS | Negative |
| Q9PVW8 | MITCYGDVQKLHCETGLIIV | Negative |
| Q9PVW8 | LSLLIATPGLLVSGANMITC | Negative |
| Q9PVW8 | LLVSGANMITCYGDVQKLHC | Negative |
| Q9PVW8 | LVSGANMITCYGDVQKLHCE | Negative |
| Q9PVW8 | ATPGLLVSGANMITCYGDVQ | Negative |

|        |                        |          |
|--------|------------------------|----------|
| Q9PVW8 | MLILKLSLLSLLIATPGLLV   | Negative |
| Q9PVW8 | GANMITCYGDVQKLHCETGL   | Negative |
| Q9PVW8 | MMLILKLSLLSLLIATPGLL   | Negative |
| Q9PVW8 | GLLVSGANMITCYGDVQKLH   | Negative |
| Q9PVW8 | LLIATPGLLVSGANMITCYG   | Negative |
| Q9PVW8 | TPGLLVSGANMITCYGDVQK   | Negative |
| Q9PVW8 | PGLLVSGANMITCYGDVQKL   | Negative |
| Q9PVW8 | LSLLSLLIATPGLLVSGANM   | Negative |
| Q9PVW8 | NMITCYGDVQKLHCETGLII   | Negative |
| Q9PVW8 | IATPGLLVSGANMITCYGDV   | Negative |
| Q9PVW8 | SGANMITCYGDVQKLHCETG   | Negative |
| Q9PVW8 | ILKLSLLSLLIATPGLLVSG   | Negative |
| Q9PW19 | CNMCVRPYPFMSSCCPEGQD   | Negative |
| Q9PW19 | LDLGYTEMCMCMCVRPYPFMS  | Negative |
| Q9PW19 | MCNMCVRPYPFMSSCCPEGQ   | Negative |
| Q9PW19 | CLDLGYTEMCMCMCVRPYPFM  | Negative |
| Q9PW19 | TEMCMCMCVRPYPFMSSCCPE  | Negative |
| Q9PW19 | RPYPFMSSCCPEGQDRCYKS   | Negative |
| Q9PW19 | YTEMCMCMCVRPYPFMSSCCP  | Negative |
| Q9PW19 | DLGYTEMCMCMCVRPYPFMSS  | Negative |
| Q9PW19 | PYPFMSSCCPEGQDRCYKSY   | Negative |
| Q9PW19 | IIICLDLGYTEMCMCMCVRPYP | Negative |
| Q9PW19 | VRPYPFMSSCCPEGQDRCYK   | Negative |
| Q9PW19 | VVTIIICLDLGYTEMCMCMCVR | Negative |
| Q9PW19 | EMCMCMCVRPYPFMSSCCPEG  | Negative |
| Q9PW19 | LVVVTHIICLDLGYTEMCMCMC | Negative |
| Q9PW19 | VTHIICLDLGYTEMCMCMCVRP | Negative |
| Q9PW19 | LLTLVVVTHIICLDLGYTEMC  | Negative |
| Q9PW19 | THIICLDLGYTEMCMCMCVRPY | Negative |
| Q9PW19 | LGYTEMCNMCVRPYPFMSSC   | Negative |
| Q9PW19 | NMCVRPYPFMSSCCPEGQDR   | Negative |
| Q9PW19 | GYTEMCMCMCVRPYPFMSSCC  | Negative |
| Q9PW19 | LLLTLVVVTHIICLDLGYTEM  | Negative |
| Q9PW19 | MCVRPYPFMSSCCPEGQDRC   | Negative |
| Q9PW19 | MKTLLLTLVVVTHIICLDLGY  | Negative |
| Q9PW19 | TLLLTLVVVTHIICLDLGYTE  | Negative |
| Q9PW19 | VVVTHIICLDLGYTEMCMCMCV | Negative |
| Q9PW19 | ICLDLGYTEMCMCMCVRPYPF  | Negative |
| Q9PW19 | LTLVVVTHIICLDLGYTEMCN  | Negative |
| Q9PW19 | KTLLLTLVVVTHIICLDLGYT  | Negative |
| Q9PW19 | CVRPYPFMSSCCPEGQDRCY   | Negative |
| Q9PW68 | YPSKPDNPGEDAPAEDMAKY   | Negative |
| Q9PW68 | WLSVLTFTLSLLICLGLAD    | Negative |
| Q9PW68 | LSLLICLGLADAYPSKPDN    | Negative |
| Q9PW68 | PSKPDNPGEDAPAEDMAKYY   | Negative |
| Q9PW68 | GSMRLWLSVLTFTLSLLICL   | Negative |

|        |                       |          |
|--------|-----------------------|----------|
| Q9PW68 | MRLWLSVLTFTLSLLICLGT  | Negative |
| Q9PW68 | ICLGTLADAYPSKPDNPGED  | Negative |
| Q9PW68 | LADAYPSKPDNPGEDAPAED  | Negative |
| Q9PW68 | TLADAYPSKPDNPGEDAPAE  | Negative |
| Q9PW68 | LWLSVLTFTLSLLICLGTLA  | Negative |
| Q9PW68 | VLFTLSLLICLGTLADAYP   | Negative |
| Q9PW68 | MQGSMRLWLSVLTFTLSLLI  | Negative |
| Q9PW68 | LICLGTLADAYPSKPDNPGE  | Negative |
| Q9PW68 | LSVLTFTLSLLICLGTLADA  | Negative |
| Q9PW68 | SMRLWLSVLTFTLSLLICLG  | Negative |
| Q9PW68 | ADAYPSKPDNPGEDAPAEDM  | Negative |
| Q9PW68 | LTFTLSLLICLGTLADAYPS  | Negative |
| Q9PW68 | RLWLSVLTFTLSLLICLGTL  | Negative |
| Q9PW68 | CLGTLADAYPSKPDNPGEDA  | Negative |
| Q9PW68 | TFTLSLLICLGTLADAYPSK  | Negative |
| Q9PW68 | QGSMRLWLSVLTFTLSLLIC  | Negative |
| Q9PW68 | LGTLADAYPSKPDNPGEDAP  | Negative |
| Q9PW68 | SVLTFTLSLLICLGTLADAY  | Negative |
| Q9PW68 | TLSLLICLGTLADAYPSKPD  | Negative |
| Q9PW68 | GTLADAYPSKPDNPGEDAPA  | Negative |
| Q9PW68 | DAYPSKPDNPGEDAPAEDMA  | Negative |
| Q9PW68 | AYPSKPDNPGEDAPAEDMAK  | Negative |
| Q9PW68 | LLICLGTLADAYPSKPDNP   | Negative |
| Q9PW68 | LLICLGTLADAYPSKPDNPG  | Negative |
| Q9PWI3 | CIDCEHCVVWQGNCTGWKET  | Negative |
| Q9PWI3 | VVWQGNCTGWKETCGENEDT  | Negative |
| Q9PWI3 | HCVVWQGNCTGWKETCGENE  | Negative |
| Q9PWI3 | MCIDCEHCVVWQGNCTGWKE  | Negative |
| Q9PWI3 | TFLATGMCIDCEHCVVWQGN  | Negative |
| Q9PWI3 | FCCLFGTFLATGMCIDCEHC  | Negative |
| Q9PWI3 | WQGNCTGWKETCGENEDTCV  | Negative |
| Q9PWI3 | MKFLLCCLFGTFLATGMCI   | Negative |
| Q9PWI3 | GTFLATGMCIDCEHCVVWQ   | Negative |
| Q9PWI3 | LATGMCIDCEHCVVWQGNCT  | Negative |
| Q9PWI3 | LLFCCLFGTFLATGMCIDCE  | Negative |
| Q9PWI3 | GQGNCTGWKETCGENEDTCVT | Negative |
| Q9PWI3 | EHCVVWQGNCTGWKETCGEN  | Negative |
| Q9PWI3 | GMCIDCEHCVVWQGNCTGWK  | Negative |
| Q9PWI3 | VWQGNCTGWKETCGENEDTC  | Negative |
| Q9PWI3 | FGTFLATGMCIDCEHCVVWG  | Negative |
| Q9PWI3 | CCLFGTFLATGMCIDCEHCV  | Negative |
| Q9PWI3 | KFLLCCLFGTFLATGMCID   | Negative |
| Q9PWI3 | ATGMCIDCEHCVVWQGNCTG  | Negative |
| Q9PWI3 | LFGTFLATGMCIDCEHCVVW  | Negative |
| Q9PWI3 | DCEHCVVWQGNCTGWKETCG  | Negative |
| Q9PWI3 | CEHCVVWQGNCTGWKETCGE  | Negative |

|        |                       |          |
|--------|-----------------------|----------|
| Q9PWI3 | FLLFCCLFGTFLATGMCIDC  | Negative |
| Q9PWI3 | IDCEHCVVWGQNCTGWKETC  | Negative |
| Q9PWI3 | QNCTGWKETCGENEDTCVTY  | Negative |
| Q9PWI3 | FLATGMCIDCEHCVVWGQNC  | Negative |
| Q9PWI3 | CLFGTFLATGMCIDCEHCVV  | Negative |
| Q9PWI3 | CVVWGQNCTGWKETCGENED  | Negative |
| Q9PWI3 | TGMCIDCEHCVVWGQNCTGW  | Negative |
| Q9PWI4 | MKSLQIICLLFIFVARGSCR  | Negative |
| Q9PWI4 | IFVARGSCRSCEICHNVGND  | Negative |
| Q9PWI4 | NVGNDCGYDYVEECHSPEDQ  | Negative |
| Q9PWI4 | LQIICLLFIFVARGSCRSCE  | Negative |
| Q9PWI4 | CLLFIFVARGSCRSCEICHN  | Negative |
| Q9PWI4 | IICLLFIFVARGSCRSCEIC  | Negative |
| Q9PWI4 | SLQIICLLFIFVARGSCRSCE | Negative |
| Q9PWI4 | LLFIFVARGSCRSCEICHNV  | Negative |
| Q9PWI4 | SCEICHNVGNDCGYDYVEEC  | Negative |
| Q9PWI4 | FIFVARGSCRSCEICHNVGN  | Negative |
| Q9PWI4 | RSCEICHNVGNDCGYDYVEE  | Negative |
| Q9PWI4 | LFIFVARGSCRSCEICHNVG  | Negative |
| Q9PWI4 | VARGSCRSCEICHNVGNDCG  | Negative |
| Q9PWI4 | GNDCGYDYVEECHSPEDQCG  | Negative |
| Q9PWI4 | NDCGYDYVEECHSPEDQCGK  | Negative |
| Q9PWI4 | SCRSCEICHNVGNDCGYDYV  | Negative |
| Q9PWI4 | ICHNVGNDCGYDYVEECHSP  | Negative |
| Q9PWI4 | GSCRSCEICHNVGNDCGYDY  | Negative |
| Q9PWI4 | HNVGNDCGYDYVEECHSPED  | Negative |
| Q9PWI4 | KSLQIICLLFIFVARGSCRS  | Negative |
| Q9PWI4 | VGNDCGYDYVEECHSPEDQC  | Negative |
| Q9PWI4 | ARGSCRSCEICHNVGNDCGY  | Negative |
| Q9PWI4 | ICLLFIFVARGSCRSCEICH  | Negative |
| Q9PWI4 | CEICHNVGNDCGYDYVEECH  | Negative |
| Q9PWI4 | CRSCEICHNVGNDCGYDYVE  | Negative |
| Q9PWI4 | RGSCRSCEICHNVGNDCGYD  | Negative |
| Q9PWI4 | EICHNVGNDCGYDYVEECHS  | Negative |
| Q9PWI4 | CHNVGNDCGYDYVEECHSPE  | Negative |
| Q9PWI4 | FVARGSCRSCEICHNVGND   | Negative |
| Q9QXX3 | GPGPGFSEATTRSHVYKRGL  | Negative |
| Q9QXX3 | TRRSHVYKRGLLELAGTLDC  | Negative |
| Q9QXX3 | GPGFSEATTRSHVYKRGLLE  | Negative |
| Q9QXX3 | LLGPGPGFSEATTRSHVYKR  | Negative |
| Q9QXX3 | SHVYKRGLLELAGTLDCVGP  | Negative |
| Q9QXX3 | MLLLLLLLLLLGPFGFSEAT  | Negative |
| Q9QXX3 | PGPGFSEATTRSHVYKRGLL  | Negative |
| Q9QXX3 | LGPFGFSEATTRSHVYKRG   | Negative |
| Q9QXX3 | LLLLLLLLLLGPFGFSEATR  | Negative |
| Q9QXX3 | GFSEATTRSHVYKRGLLELA  | Negative |

|        |                       |          |
|--------|-----------------------|----------|
| Q9QXX3 | EATRRSHVYKRGLLELAGTL  | Negative |
| Q9QXX3 | SEATRRSHVYKRGLLELAGT  | Negative |
| Q9QXX3 | RGLLELAGTLDCVGPRSPMA  | Negative |
| Q9QXX3 | LLLLLLGPGPGFSEATRRS   | Negative |
| Q9QXX3 | RRSHVYKRGLLELAGTLDCV  | Negative |
| Q9QXX3 | LLELAGTLDCVGPRSPMAYM  | Negative |
| Q9QXX3 | PGFSEATRRSHVYKRGLLEL  | Negative |
| Q9QXX3 | HVYKRGLLELAGTLDCVGPR  | Negative |
| Q9QXX3 | VYKRGLLELAGTLDCVGPRS  | Negative |
| Q9QXX3 | FSEATRRSHVYKRGLLELAG  | Negative |
| Q9QXX3 | RSHVYKRGLLELAGTLDCVG  | Negative |
| Q9QXX3 | ATRRSHVYKRGLLELAGTLD  | Negative |
| Q9QXX3 | LLGPGPGFSEATRRSHVYK   | Negative |
| Q9QXX3 | LLLGPFGFSEATRRSHVY    | Negative |
| Q9QXX3 | YKRGLLELAGTLDCVGPRSP  | Negative |
| Q9QXX3 | GLLELAGTLDCVGPRSPMAY  | Negative |
| Q9QXX3 | KRGLLELAGTLDCVGPRSPM  | Negative |
| Q9QXX3 | LLLLLLGPGPGFSEATRRSH  | Negative |
| Q9QXX3 | LLLLLLGPGPGFSEATRRSHV | Negative |
| Q9RQB9 | VFGVLFSahalADVTNAEKL  | Negative |
| Q9RQB9 | AVFGVLFSahalADVTNAEK  | Negative |
| Q9RQB9 | HALADVTNAEKLvykytnia  | Negative |
| Q9RQB9 | SAHALADVTNAEKLvykytn  | Negative |
| Q9RQB9 | VLFSahalADVTNAEKLvyk  | Negative |
| Q9RQB9 | MKIktiiAVFGVLFSahala  | Negative |
| Q9RQB9 | AHALADVTNAEKLvykytni  | Negative |
| Q9RQB9 | LADVTNAEKLvykytniahs  | Negative |
| Q9RQB9 | VYKYTNIAHSANPMYEAPSI  | Negative |
| Q9RQB9 | IKTiiAVFGVLFSahalADV  | Negative |
| Q9RQB9 | GVLFSAHALADVTNAEKLvy  | Negative |
| Q9RQB9 | YKYTNIAHSANPMYEAPSIT  | Negative |
| Q9RQB9 | NAEKLvykytniahsANPMY  | Negative |
| Q9RQB9 | KLvykytniahsANPMYEAP  | Negative |
| Q9RQB9 | LVYKYTNIAHSANPMYEAPS  | Negative |
| Q9RQB9 | TNAEKLvykytniahsANPM  | Negative |
| Q9RQB9 | TiiAVFGVLFSahalADVTN  | Negative |
| Q9RQB9 | VTNAEKLvykytniahsANP  | Negative |
| Q9RQB9 | KTiiAVFGVLFSahalADVT  | Negative |
| Q9RQB9 | LFSahalADVTNAEKLvyky  | Negative |
| Q9RQB9 | FSahalADVTNAEKLvykyt  | Negative |
| Q9RQB9 | EKLvykytniahsANPMYEA  | Negative |
| Q9RQB9 | ADVTNAEKLvykytniahsA  | Negative |
| Q9RQB9 | DVTNAEKLvykytniahsAN  | Negative |
| Q9RQB9 | ALADVTNAEKLvykytniaH  | Negative |
| Q9RQB9 | KIKTiiAVFGVLFSahalAD  | Negative |
| Q9RQB9 | FGVLFSahalADVTNAEKLv  | Negative |

|        |                       |          |
|--------|-----------------------|----------|
| Q9RQB9 | AEKLVYKYTNIAHSANPMYE  | Negative |
| Q9RQB9 | IAVFGVLFSahaladvTNAE  | Negative |
| Q9RU24 | TSLAAPFVYPANWTSNKP GD | Negative |
| Q9RU24 | GASTSLAAPFVYPANWTSNK  | Negative |
| Q9RU24 | MLALALGASTSLAAPFVYPA  | Negative |
| Q9RU24 | MKKVMMLALALGASTSLAAP  | Negative |
| Q9RU24 | KVMMLALALGASTSLAAPFV  | Negative |
| Q9RU24 | SLAAPFVYPANWTSNKP GDV | Negative |
| Q9RU24 | NKPGDVQTGGTFRSVNLQDF  | Negative |
| Q9RU24 | YPANWTSNKP GDVQTGGTFR | Negative |
| Q9RU24 | LALGASTSLAAPFVYPANWT  | Negative |
| Q9RU24 | MMLALALGASTSLAAPFVYP  | Negative |
| Q9RU24 | VYPANWTSNKP GDVQTGGTF | Negative |
| Q9RU24 | ANWTSNKP GDVQTGGTFRSV | Negative |
| Q9RU24 | AAPFVYPANWTSNKP GDVQT | Negative |
| Q9RU24 | SNKP GDVQTGGTFRSVNLQD | Negative |
| Q9RU24 | STSLAAPFVYPANWTSNKP G | Negative |
| Q9RU24 | ALALGASTSLAAPFVYPANW  | Negative |
| Q9RU24 | NWTSNKP GDVQTGGTFRSVN | Negative |
| Q9RU24 | ALGASTSLAAPFVYPANWTS  | Negative |
| Q9RU24 | FVYPANWTSNKP GDVQTGGT | Negative |
| Q9RU24 | KKVMMLALALGASTSLAAPF  | Negative |
| Q9RU24 | TSNKP GDVQTGGTFRSVNLQ | Negative |
| Q9RU24 | LGASTSLAAPFVYPANWTSN  | Negative |
| Q9RU24 | LALALGASTSLAAPFVYPAN  | Negative |
| Q9RU24 | APFVYPANWTSNKP GDVQTG | Negative |
| Q9RU24 | WTSNKP GDVQTGGTFRSVNL | Negative |
| Q9RU24 | LAAPFVYPANWTSNKP GDVQ | Negative |
| Q9RU24 | PFVYPANWTSNKP GDVQTGG | Negative |
| Q9RU24 | PANWTSNKP GDVQTGGTFRS | Negative |
| Q9RU24 | ASTSLAAPFVYPANWTSNKP  | Negative |
| Q9S1E5 | LLASNINEREKERV ALNKTA | Negative |
| Q9S1E5 | VAIVSMGLLASNINEREKER  | Negative |
| Q9S1E5 | VSMGLLASNINEREKERV AL | Negative |
| Q9S1E5 | FKLLLAGSLVAIVSMGLLAS  | Negative |
| Q9S1E5 | LLLAGSLVAIVSMGLLASNI  | Negative |
| Q9S1E5 | NINEREKERV ALNKTAHSQG | Negative |
| Q9S1E5 | INEREKERV ALNKTAHSQGI | Negative |
| Q9S1E5 | REKERV ALNKTAHSQGIEGK | Negative |
| Q9S1E5 | IVSMGLLASNINEREKERV A | Negative |
| Q9S1E5 | NEREKERV ALNKTAHSQGIE | Negative |
| Q9S1E5 | EKERV ALNKTAHSQGIEGKA | Negative |
| Q9S1E5 | SNINEREKERV ALNKTAHSQ | Negative |
| Q9S1E5 | AIVSMGLLASNINEREKERV  | Negative |
| Q9S1E5 | TKFKLLLAGSLVAIVSMGLL  | Negative |
| Q9S1E5 | KFKLLLAGSLVAIVSMGLLA  | Negative |

|        |                      |          |
|--------|----------------------|----------|
| Q9S1E5 | AGSLVAIVSMGLLASNINER | Negative |
| Q9S1E5 | EREKERVAlNKTAHSQGIEG | Negative |
| Q9S1E5 | MGLLASNINEREKERVAlNK | Negative |
| Q9S1E5 | GLLASNINEREKERVAlNKT | Negative |
| Q9S1E5 | KERVAlNKTAHSQGIEGKAM | Negative |
| Q9S1E5 | SLVAIVSMGLLASNINEREK | Negative |
| Q9S1E5 | KLLLAGSLVAIVSMGLLASN | Negative |
| Q9S1E5 | GSLVAIVSMGLLASNINERE | Negative |
| Q9S1E5 | SMGLLASNINEREKERVAlN | Negative |
| Q9S1E5 | LVAIVSMGLLASNINEREKE | Negative |
| Q9S1E5 | LLAGSLVAIVSMGLLASNIN | Negative |
| Q9S1E5 | ASNINEREKERVAlNKTAHS | Negative |
| Q9S1E5 | MTKFKLLLAGSLVAIVSMGL | Negative |
| Q9S1E5 | LASNINEREKERVAlNKTAH | Negative |
| Q9S1G7 | DGAPAAQRTIQVLSVKGGDA | Negative |
| Q9S1G7 | AAAAWATGAAAAADGAPAAQ | Negative |
| Q9S1G7 | AAAAADGAPAAQRTIQVLSV | Negative |
| Q9S1G7 | TGAAAAADGAPAAQRTIQVL | Negative |
| Q9S1G7 | MSLAAAAAWATGAAAAADGA | Negative |
| Q9S1G7 | AAWATGAAAAADGAPAAQRT | Negative |
| Q9S1G7 | AMSLAAAAAWATGAAAAADG | Negative |
| Q9S1G7 | AAAADGAPAAQRTIQVLSVK | Negative |
| Q9S1G7 | AAADGAPAAQRTIQVLSVKG | Negative |
| Q9S1G7 | ATGAAAAADGAPAAQRTIQV | Negative |
| Q9S1G7 | TSSMMKRMAAMSLAAAAAWA | Negative |
| Q9S1G7 | AADGAPAAQRTIQVLSVKGG | Negative |
| Q9S1G7 | ADGAPAAQRTIQVLSVKGGD | Negative |
| Q9S1G7 | MKRMAAMSLAAAAAWATGAA | Negative |
| Q9S1G7 | GAAAAADGAPAAQRTIQVLS | Negative |
| Q9S1G7 | WATGAAAAADGAPAAQRTIQ | Negative |
| Q9S1G7 | KRMAAMSLAAAAAWATGAAA | Negative |
| Q9S1G7 | AAAAAWATGAAAAADGAPAA | Negative |
| Q9S1G7 | SSMMKRMAAMSLAAAAAWAT | Negative |
| Q9S1G7 | LAAAAAWATGAAAAADGAPA | Negative |
| Q9S1G7 | RTSSMMKRMAAMSLAAAAAW | Negative |
| Q9S1G7 | SMMKRMAAMSLAAAAAWATG | Negative |
| Q9S1G7 | AWATGAAAAADGAPAAQRTI | Negative |
| Q9S1G7 | AAMSLAAAAAWATGAAAAAD | Negative |
| Q9S1G7 | MAAMSLAAAAAWATGAAAAA | Negative |
| Q9S1G7 | MRTSSMMKRMAAMSLAAAAA | Negative |
| Q9S1G7 | AAAWATGAAAAADGAPAAQR | Negative |
| Q9S1G7 | MMKRMAAMSLAAAAAWATGA | Negative |
| Q9S1G7 | RMAAMSLAAAAAWATGAAAA | Negative |
| Q9S3R8 | EATTQNKAGMHTAFQRDKAS | Negative |
| Q9S3R8 | FSATAQEATTQNKAGMHTAF | Negative |
| Q9S3R8 | AKSLLLALAGLACTFSATAQ | Negative |

|        |                      |          |
|--------|----------------------|----------|
| Q9S3R8 | NKAGMHTAFQRDKASDHWFI | Negative |
| Q9S3R8 | LALAGLACTFSATAQEATTQ | Negative |
| Q9S3R8 | SATAQEATTQNKAGMHTAFQ | Negative |
| Q9S3R8 | LAGLACTFSATAQEATTQNK | Negative |
| Q9S3R8 | SLLLALAGLACTFSATAQEA | Negative |
| Q9S3R8 | ALAGLACTFSATAQEATTQN | Negative |
| Q9S3R8 | LACTFSATAQEATTQNKAGM | Negative |
| Q9S3R8 | MKAKSLLLALAGLACTFSAT | Negative |
| Q9S3R8 | TQNKAGMHTAFQRDKASDHW | Negative |
| Q9S3R8 | ATAQEATTQNKAGMHTAFQR | Negative |
| Q9S3R8 | KAGMHTAFQRDKASDHWFI  | Negative |
| Q9S3R8 | TAQEATTQNKAGMHTAFQRD | Negative |
| Q9S3R8 | AGMHTAFQRDKASDHWFI   | Negative |
| Q9S3R8 | QNKAGMHTAFQRDKASDHW  | Negative |
| Q9S3R8 | ATTQNKAGMHTAFQRDKASD | Negative |
| Q9S3R8 | TTQNKAGMHTAFQRDKASDH | Negative |
| Q9S3R8 | KSLLLALAGLACTFSATAQE | Negative |
| Q9S3R8 | LLLALAGLACTFSATAQEAT | Negative |
| Q9S3R8 | AGLACTFSATAQEATTQNK  | Negative |
| Q9S3R8 | TFSATAQEATTQNKAGMHTA | Negative |
| Q9S3R8 | AQEATTQNKAGMHTAFQRDK | Negative |
| Q9S3R8 | QEATTQNKAGMHTAFQRDKA | Negative |
| Q9S3R8 | CTFSATAQEATTQNKAGMHT | Negative |
| Q9S3R8 | GLACTFSATAQEATTQNKAG | Negative |
| Q9S3R8 | KAKSLLLALAGLACTFSATA | Negative |
| Q9S3R8 | ACTFSATAQEATTQNKAGMH | Negative |
| Q9S3R9 | IALNASAQENTVPATGQLPA | Negative |
| Q9S3R9 | VKYLMLTLVGAIALNASAQE | Negative |
| Q9S3R9 | QENTVPATGQLPAKNVAFAR | Negative |
| Q9S3R9 | VPATGQLPAKNVAFARNKAG | Negative |
| Q9S3R9 | AQENTVPATGQLPAKNVAF  | Negative |
| Q9S3R9 | GQLPAKNVAFARNKAGSNWF | Negative |
| Q9S3R9 | NTVPATGQLPAKNVAFARNK | Negative |
| Q9S3R9 | ATGQLPAKNVAFARNKAGSN | Negative |
| Q9S3R9 | AIALNASAQENTVPATGQLP | Negative |
| Q9S3R9 | PATGQLPAKNVAFARNKAGS | Negative |
| Q9S3R9 | ALNASAQENTVPATGQLPAK | Negative |
| Q9S3R9 | LNASAQENTVPATGQLPAKN | Negative |
| Q9S3R9 | MKVKYLMLTLVGAIALNASA | Negative |
| Q9S3R9 | TGQLPAKNVAFARNKAGSNW | Negative |
| Q9S3R9 | KYLMLTLVGAIALNASAQEN | Negative |
| Q9S3R9 | ASAQENTVPATGQLPAKNVA | Negative |
| Q9S3R9 | QLPAKNVAFARNKAGSNWFV | Negative |
| Q9S3R9 | NASAQENTVPATGQLPAKNV | Negative |
| Q9S3R9 | VGAIALNASAQENTVPATGQ | Negative |
| Q9S3R9 | KVKYLMLTLVGAIALNASAQ | Negative |



|        |                      |          |
|--------|----------------------|----------|
| Q9S3R9 | TVPATGQLPAKNVAFARNKA | Negative |
| Q9S3R9 | LTLVGAIALNASAQENTVPA | Negative |
| Q9S3R9 | LVGAIALNASAQENTVPATG | Negative |
| Q9S3R9 | YLMLTLVGAIALNASAQENT | Negative |
| Q9S3R9 | ENTVPATGQLPAKNVAFARN | Negative |
| Q9S3R9 | SAQENTVPATGQLPAKNVAF | Negative |
| Q9S3R9 | GAIALNASAQENTVPATGQL | Negative |
| Q9S3R9 | TLVGAIALNASAQENTVPAT | Negative |
| Q9S3R9 | MLTLVGAIALNASAQENTVP | Negative |
| Q9S7Y7 | SLSLLLALILCFSPTQSYKT | Negative |
| Q9S7Y7 | KTIGKGYRLVSIEESPDGGF | Negative |
| Q9S7Y7 | LLLALILCFSPTQSYKTIGK | Negative |
| Q9S7Y7 | LCFSPTQSYKTIGKGYRLVS | Negative |
| Q9S7Y7 | CFSPTQSYKTIGKGYRLVSI | Negative |
| Q9S7Y7 | LLALILCFSPTQSYKTIGKG | Negative |
| Q9S7Y7 | ALILCFSPTQSYKTIGKGYR | Negative |
| Q9S7Y7 | ILCFSPTQSYKTIGKGYRLV | Negative |
| Q9S7Y7 | SSLAFSLSLLLALILCFSPT | Negative |
| Q9S7Y7 | LALILCFSPTQSYKTIGKGY | Negative |
| Q9S7Y7 | MASSSSSLAFSLSLLLALIL | Negative |
| Q9S7Y7 | LAFSLSLLLALILCFSPTQS | Negative |
| Q9S7Y7 | QSYKTIGKGYRLVSIEESPD | Negative |
| Q9S7Y7 | SSSSLAFSLSLLLALILCFS | Negative |
| Q9S7Y7 | LILCFSPTQSYKTIGKGYRL | Negative |
| Q9S7Y7 | SLAFSLSLLLALILCFSPTQ | Negative |
| Q9S7Y7 | YKTIGKGYRLVSIEESPDGG | Negative |
| Q9S7Y7 | FSPTQSYKTIGKGYRLVSIE | Negative |
| Q9S7Y7 | SSSLAFSLSLLLALILCFSP | Negative |
| Q9S7Y7 | TQSYKTIGKGYRLVSIEESP | Negative |
| Q9S7Y7 | SSSSSLAFSLSLLLALILCF | Negative |
| Q9S7Y7 | TIGKGYRLVSIEESPDGGFI | Negative |
| Q9S7Y7 | PTQSYKTIGKGYRLVSIEES | Negative |
| Q9S7Y7 | SYKTIGKGYRLVSIEESPDG | Negative |
| Q9S7Y7 | FSLSLLLALILCFSPTQSYK | Negative |
| Q9S7Y7 | ASSSSSLAFSLSLLLALILC | Negative |
| Q9S7Y7 | LSLLLALILCFSPTQSYKTI | Negative |
| Q9S7Y7 | SPTQSYKTIGKGYRLVSIEE | Negative |
| Q9S7Y7 | AFSLSLLLALILCFSPTQSY | Negative |
| Q9S8P4 | ALQDLCVADYASVILVNGFA | Negative |
| Q9S8P4 | QDLCVADYASVILVNGFACK | Negative |
| Q9S8P4 | KLIAVLLLVLATATTATAA  | Negative |
| Q9S8P4 | DALQDLCVADYASVILVNGF | Negative |
| Q9S8P4 | VLATATTATAADADALQDLC | Negative |
| Q9S8P4 | TAADADALQDLCVADYASVI | Negative |
| Q9S8P4 | LIAVLLLVLATATTATAAD  | Negative |
| Q9S8P4 | LLVVLATATTATAADADALQ | Negative |

|        |                      |          |
|--------|----------------------|----------|
| Q9S8P4 | LVVLATATTATAADADALQD | Negative |
| Q9S8P4 | ATATTATAADADALQDLCVA | Negative |
| Q9S8P4 | TTATAADADALQDLCVADYA | Negative |
| Q9S8P4 | AADADALQDLCVADYASVIL | Negative |
| Q9S8P4 | VVLATATTATAADADALQDL | Negative |
| Q9S8P4 | IAVLLLVLATATTATAADA  | Negative |
| Q9S8P4 | DADALQDLCVADYASVILVN | Negative |
| Q9S8P4 | LCVADYASVILVNGFACKPA | Negative |
| Q9S8P4 | TATTATAADADALQDLCVAD | Negative |
| Q9S8P4 | LATATTATAADADALQDLCV | Negative |
| Q9S8P4 | LQDLCVADYASVILVNGFAC | Negative |
| Q9S8P4 | LLLVLATATTATAADADAL  | Negative |
| Q9S8P4 | AVLLLVLATATTATAADAD  | Negative |
| Q9S8P4 | CVADYASVILVNGFACKPAS | Negative |
| Q9S8P4 | DLCVADYASVILVNGFACKP | Negative |
| Q9S8P4 | ATTATAADADALQDLCVADY | Negative |
| Q9S8P4 | ATAADADALQDLCVADYASV | Negative |
| Q9S8P4 | MKLIAVLLLVLATATTATA  | Negative |
| Q9S8P4 | TATAADADALQDLCVADYAS | Negative |
| Q9S8P4 | ADADALQDLCVADYASVILV | Negative |
| Q9S8P4 | ADALQDLCVADYASVILVNG | Negative |
| Q9SJY7 | MNSKAMQALIFLGFLATSCL | Negative |
| Q9SJY7 | ALIFLGFLATSCLAQAPAPA | Negative |
| Q9SJY7 | NSKAMQALIFLGFLATSCLA | Negative |
| Q9SJY7 | LIFLGFLATSCLAQAPAPAP | Negative |
| Q9SJY7 | AMQALIFLGFLATSCLAQAP | Negative |
| Q9SJY7 | MQALIFLGFLATSCLAQAPA | Negative |
| Q9SJY7 | APAPTTVTPPPTALPPVTAE | Negative |
| Q9SJY7 | TVTPPPTALPPVTAETPSPI | Negative |
| Q9SJY7 | APTTVTPPPTALPPVTAETP | Negative |
| Q9SJY7 | LGFLATSCLAQAPAPAPTTV | Negative |
| Q9SJY7 | LATSCLAQAPAPAPTTVTPP | Negative |
| Q9SJY7 | TTVTPPPTALPPVTAETPSP | Negative |
| Q9SJY7 | FLGFLATSCLAQAPAPAPTT | Negative |
| Q9SJY7 | PAPTTVTPPPTALPPVTAET | Negative |
| Q9SJY7 | IFLGFLATSCLAQAPAPAPT | Negative |
| Q9SJY7 | PTTVTPPPTALPPVTAETPS | Negative |
| Q9SJY7 | ATSCLAQAPAPAPTTVTPPP | Negative |
| Q9SJY7 | CLAQAPAPAPTTVTPPPTAL | Negative |
| Q9SJY7 | QAPAPAPTTVTPPPTALPPV | Negative |
| Q9SJY7 | APAPAPTTVTPPPTALPPVT | Negative |
| Q9SJY7 | SCLAQAPAPAPTTVTPPPTA | Negative |
| Q9SJY7 | LAQAPAPAPTTVTPPPTALP | Negative |
| Q9SJY7 | GFLATSCLAQAPAPAPTTVT | Negative |
| Q9SJY7 | AQAPAPAPTTVTPPPTALPP | Negative |
| Q9SJY7 | PAPAPTTVTPPPTALPPVTA | Negative |

|        |                       |          |
|--------|-----------------------|----------|
| Q9SJY7 | FLATSCLAQAPAPAPTTVTP  | Negative |
| Q9SJY7 | KAMQALIFLGFLATSCLAQA  | Negative |
| Q9SJY7 | SKAMQALIFLGFLATSCLAQ  | Negative |
| Q9SJY7 | TSCLAQAPAPAPTTVTPPPT  | Negative |
| Q9SLP4 | SPLLPLTSALVFREYIGSQF  | Negative |
| Q9SLP4 | TSALVFREYIGSQFNDVKFS  | Negative |
| Q9SLP4 | FREYIGSQFNDVKFSDVPIN  | Negative |
| Q9SLP4 | SPSSLLLLFFALLSPLLPLT  | Negative |
| Q9SLP4 | MASVSPSSLLLLFFALLSPL  | Negative |
| Q9SLP4 | LPLTSALVFREYIGSQFNDV  | Negative |
| Q9SLP4 | LLFFALLSPLLPLTSALVFR  | Negative |
| Q9SLP4 | FALLSPLLPLTSALVFREYI  | Negative |
| Q9SLP4 | PLLPLTSALVFREYIGSQFN  | Negative |
| Q9SLP4 | PLTSALVFREYIGSQFNDVK  | Negative |
| Q9SLP4 | ASVSPSSLLLLFFALLSPLL  | Negative |
| Q9SLP4 | SLLLLFFALLSPLLPLTSAL  | Negative |
| Q9SLP4 | ALLSPLLPLTSALVFREYIG  | Negative |
| Q9SLP4 | PSSLLLLFFALLSPLLPLTS  | Negative |
| Q9SLP4 | LLLFFALLSPLLPLTSALVF  | Negative |
| Q9SLP4 | ALVFREYIGSQFNDVKFSDV  | Negative |
| Q9SLP4 | LLLLFFALLSPLLPLTSALV  | Negative |
| Q9SLP4 | LLPLTSALVFREYIGSQFND  | Negative |
| Q9SLP4 | VSPSSLLLLFFALLSPLLPL  | Negative |
| Q9SLP4 | LSPLLPLTSALVFREYIGSQ  | Negative |
| Q9SLP4 | REYIGSQFNDVKFSDVPINP  | Negative |
| Q9SLP4 | FFALLSPLLPLTSALVFREY  | Negative |
| Q9SLP4 | VFREYIGSQFNDVKFSDVPI  | Negative |
| Q9SLP4 | LTSALVFREYIGSQFNDVKF  | Negative |
| Q9SLP4 | SSLLLLFFALLSPLLPLTSA  | Negative |
| Q9SLP4 | LVFREYIGSQFNDVKFSDVP  | Negative |
| Q9SLP4 | LLSPLLPLTSALVFREYIGS  | Negative |
| Q9SLP4 | SVSPSSLLLLFFALLSPLL   | Negative |
| Q9SLP4 | SALVFREYIGSQFNDVKFSD  | Negative |
| Q9SLY8 | ASVA AVAGEVFFQEKFEDGW | Negative |
| Q9SLY8 | ALALASVA AVAGEVFFQEK  | Negative |
| Q9SLY8 | LASVA AVAGEVFFQEKFEDG | Negative |
| Q9SLY8 | VAAVAGEVFFQEKFEDGWES  | Negative |
| Q9SLY8 | VAGEVFFQEKFEDGWESRWV  | Negative |
| Q9SLY8 | SSYAAAVALALALASVA AV  | Negative |
| Q9SLY8 | ALALALASVA AVAGEVFFQE | Negative |
| Q9SLY8 | AAVAGEVFFQEKFEDGWESR  | Negative |
| Q9SLY8 | AAVALALALASVA AVAGEVF | Negative |
| Q9SLY8 | SYAAAVALALALASVA AVA  | Negative |
| Q9SLY8 | AVAGEVFFQEKFEDGWESRW  | Negative |
| Q9SLY8 | LALASVA AVAGEVFFQEKFE | Negative |
| Q9SLY8 | RSSSYAAAVALALALASVA   | Negative |

|        |                      |          |
|--------|----------------------|----------|
| Q9SLY8 | AAAVALALALASVAAVAGEV | Negative |
| Q9SLY8 | IRARSSSYAAAAVALALALA | Negative |
| Q9SLY8 | LALALASVAAVAGEVFFQEK | Negative |
| Q9SLY8 | AVALALALASVAAVAGEVFF | Negative |
| Q9SLY8 | SSSYAAAAVALALALASVAA | Negative |
| Q9SLY8 | GEVFFQEKFEDGWESRWVKS | Negative |
| Q9SLY8 | AAAAVALALALASVAAVAGE | Negative |
| Q9SLY8 | AIRARSSSYAAAAVALALAL | Negative |
| Q9SLY8 | SVAAVAGEVFFQEKFEDGWE | Negative |
| Q9SLY8 | MAIRARSSSYAAAAVALALA | Negative |
| Q9SLY8 | YAAAAVALALALASVAAVAG | Negative |
| Q9SLY8 | EVFFQEKFEDGWESRWVKSE | Negative |
| Q9SLY8 | ALASVAAVAGEVFFQEKFED | Negative |
| Q9SLY8 | ARSSSYAAAAVALALALASV | Negative |
| Q9SLY8 | AGEVFFQEKFEDGWESRWVK | Negative |
| Q9SLY8 | RARSSSYAAAAVALALALAS | Negative |
| Q9SR37 | NADGPVCPSPNKLRSASFPE | Negative |
| Q9SR37 | MVLQKLPLIGLLLLLTIVAS | Negative |
| Q9SR37 | LLLLTIVASPANADGPVCP  | Negative |
| Q9SR37 | LTIVASPANADGPVCPSPNK | Negative |
| Q9SR37 | PPSNKLRSASFPEGFLFGTA | Negative |
| Q9SR37 | DGPVCPSPNKLRSASFPEGF | Negative |
| Q9SR37 | VLQKLPLIGLLLLLTIVASP | Negative |
| Q9SR37 | QKLPLIGLLLLLTIVASPAN | Negative |
| Q9SR37 | GPVCPSPNKLRSASFPEGFL | Negative |
| Q9SR37 | ANADGPVCPSPNKLRSASFP | Negative |
| Q9SR37 | PANADGPVCPSPNKLRSASF | Negative |
| Q9SR37 | TIVASPANADGPVCPSPNKL | Negative |
| Q9SR37 | LLLTIVASPANADGPVCPSP | Negative |
| Q9SR37 | ASPANADGPVCPSPNKLRSR | Negative |
| Q9SR37 | LLTIVASPANADGPVCPSPN | Negative |
| Q9SR37 | IGLLLLLTIVASPANADGPV | Negative |
| Q9SR37 | VCPPSNKLRSASFPEGFLFG | Negative |
| Q9SR37 | IVASPANADGPVCPSPNKL  | Negative |
| Q9SR37 | LPLIGLLLLLTIVASPANAD | Negative |
| Q9SR37 | KLPLIGLLLLLTIVASPANA | Negative |
| Q9SR37 | LQKLPLIGLLLLLTIVASPA | Negative |
| Q9SR37 | PLIGLLLLLTIVASPANADG | Negative |
| Q9SR37 | VASPANADGPVCPSPNKLRS | Negative |
| Q9SR37 | LLLLLTIVASPANADGPVCP | Negative |
| Q9SR37 | LIGLLLLLTIVASPANADGP | Negative |
| Q9SR37 | CPPSNKLRSASFPEGFLFGT | Negative |
| Q9SR37 | PVCPSPNKLRSASFPEGFLF | Negative |
| Q9SR37 | ADGPVCPSPNKLRSASFPEG | Negative |
| Q9SR37 | SPANADGPVCPSPNKLRSAS | Negative |
| Q9STQ3 | AVLVAAMAFSAVQQAAAVEA | Negative |

|        |                      |          |
|--------|----------------------|----------|
| Q9STQ3 | FVAVLVAAMAFSAVQQAAAV | Negative |
| Q9STQ3 | AAMAFSAVQQAAAVEAPAPS | Negative |
| Q9STQ3 | AVQQAAAVEAPAPSPTSDAS | Negative |
| Q9STQ3 | RLFVAVLVAAMAFSAVQQAA | Negative |
| Q9STQ3 | QAAAVEAPAPSPTSDASLAI | Negative |
| Q9STQ3 | APAPSPTSDASLAIPAFFAS | Negative |
| Q9STQ3 | EAPAPSPTSDASLAIPAFFA | Negative |
| Q9STQ3 | VLVAAMAFSAVQQAAAVEAP | Negative |
| Q9STQ3 | KMRLFVAVLVAAMAFSAVQQ | Negative |
| Q9STQ3 | LFVAVLVAAMAFSAVQQAAA | Negative |
| Q9STQ3 | SAVQQAAAVEAPAPSPTSDA | Negative |
| Q9STQ3 | QQAAAVEAPAPSPTSDASLA | Negative |
| Q9STQ3 | AFSAVQQAAAVEAPAPSPTS | Negative |
| Q9STQ3 | AVEAPAPSPTSDASLAIPAF | Negative |
| Q9STQ3 | MKMRLFVAVLVAAMAFSAVQ | Negative |
| Q9STQ3 | VAVLVAAMAFSAVQQAAAVE | Negative |
| Q9STQ3 | AAAVEAPAPSPTSDASLAIP | Negative |
| Q9STQ3 | VEAPAPSPTSDASLAIPAFF | Negative |
| Q9STQ3 | MRLFVAVLVAAMAFSAVQQA | Negative |
| Q9STQ3 | MAFSAVQQAAAVEAPAPSPT | Negative |
| Q9STQ3 | MEAMKMRLFVAVLVAAMAFS | Negative |
| Q9STQ3 | AAVEAPAPSPTSDASLAIPA | Negative |
| Q9STQ3 | AMAFSAVQQAAAVEAPAPSP | Negative |
| Q9STQ3 | VAAMAFSAVQQAAAVEAPAP | Negative |
| Q9STQ3 | FSAVQQAAAVEAPAPSPTSD | Negative |
| Q9STQ3 | AMKMRLFVAVLVAAMAFSAV | Negative |
| Q9STQ3 | VQQAAAVEAPAPSPTSDASL | Negative |
| Q9STQ3 | EAMKMRLFVAVLVAAMAFSA | Negative |
| Q9SU40 | FVNISFCFAADPYSFYNFV  | Negative |
| Q9SU40 | NISFCFAADPYSFYNFVSY  | Negative |
| Q9SU40 | LLVFFVNISFCFAADPYSF  | Negative |
| Q9SU40 | VFFVNISFCFAADPYSFYNF | Negative |
| Q9SU40 | FAADPYSFYNFVSYITASP  | Negative |
| Q9SU40 | LVFFVNISFCFAADPYSFYN | Negative |
| Q9SU40 | DPYSFYNFVSYITASPLGV  | Negative |
| Q9SU40 | LFKILLLVFFVNISFCFAAD | Negative |
| Q9SU40 | SFYNFVSYITASPLGVPQQ  | Negative |
| Q9SU40 | DLFKILLLVFFVNISFCFAA | Negative |
| Q9SU40 | CFAADPYSFYNFVSYITAS  | Negative |
| Q9SU40 | MDLFKILLLVFFVNISFCFA | Negative |
| Q9SU40 | FCFAADPYSFYNFVSYITA  | Negative |
| Q9SU40 | AADPYSFYNFVSYITASPL  | Negative |
| Q9SU40 | FKILLLVFFVNISFCFAADP | Negative |
| Q9SU40 | SFCFAADPYSFYNFVSYIT  | Negative |
| Q9SU40 | ADPYSFYNFVSYITASPLG  | Negative |
| Q9SU40 | FYNFVSYITASPLGVPQQV  | Negative |

|        |                       |          |
|--------|-----------------------|----------|
| Q9SU40 | LLVFFVNISFCFAADPYSFY  | Negative |
| Q9SU40 | YSFYNFVSYITASPLGVPQ   | Negative |
| Q9SU40 | FFVNISFCFAADPYSFYNFE  | Negative |
| Q9SU40 | KILLVFFVNISFCFAADPY   | Negative |
| Q9SU40 | FEVSYITASPLGVPQQVIAI  | Negative |
| Q9SU40 | VNISFCFAADPYSFYNFEVS  | Negative |
| Q9SU40 | NFEVSYITASPLGVPQQVIA  | Negative |
| Q9SU40 | EVSYITASPLGVPQQVIAIN  | Negative |
| Q9SU40 | PYSFYNFVSYITASPLGVP   | Negative |
| Q9SU40 | YNFEVSYITASPLGVPQQVI  | Negative |
| Q9SU40 | ISFCFAADPYSFYNFEVSYI  | Negative |
| Q9SUQ8 | FSFFLLVLLFSDTVLSFRKT  | Negative |
| Q9SUQ8 | LFKALFSFFLLVLLFSDTVL  | Negative |
| Q9SUQ8 | LVEKQLFKALFSFFLLVLLF  | Negative |
| Q9SUQ8 | LLVLLFSDTVLSFRKTIDQK  | Negative |
| Q9SUQ8 | VLLFSDTVLSFRKTIDQKKP  | Negative |
| Q9SUQ8 | VLSFRKTIDQKKPCKHFSFY  | Negative |
| Q9SUQ8 | EKQLFKALFSFFLLVLLFSD  | Negative |
| Q9SUQ8 | VEKQLFKALFSFFLLVLLFS  | Negative |
| Q9SUQ8 | KALFSFFLLVLLFSDTVLSF  | Negative |
| Q9SUQ8 | QLFKALFSFFLLVLLFSDTV  | Negative |
| Q9SUQ8 | FRKTIDQKKPCKHFSFYFHD  | Negative |
| Q9SUQ8 | SFRKTIDQKKPCKHFSFYFH  | Negative |
| Q9SUQ8 | MAFLVEKQLFKALFSFFLLV  | Negative |
| Q9SUQ8 | FKALFSFFLLVLLFSDTVLS  | Negative |
| Q9SUQ8 | FFLLVLLFSDTVLSFRKTID  | Negative |
| Q9SUQ8 | DTVLSFRKTIDQKKPCKHFS  | Negative |
| Q9SUQ8 | ALFSFFLLVLLFSDTVLSFR  | Negative |
| Q9SUQ8 | AFLVEKQLFKALFSFFLLVL  | Negative |
| Q9SUQ8 | LVLLFSDTVLSFRKTIDQKK  | Negative |
| Q9SUQ8 | FLVEKQLFKALFSFFLLVLL  | Negative |
| Q9SUQ8 | TVLSFRKTIDQKKPCKHFSF  | Negative |
| Q9SUQ8 | LFSFFLLVLLFSDTVLSFRK  | Negative |
| Q9SUQ8 | SDTVLSFRKTIDQKKPCKHF  | Negative |
| Q9SUQ8 | LLFSDTVLSFRKTIDQKKPC  | Negative |
| Q9SUQ8 | LSFRKTIDQKKPCKHFSFYF  | Negative |
| Q9SUQ8 | FSDTVLSFRKTIDQKKPCKH  | Negative |
| Q9SUQ8 | KQLFKALFSFFLLVLLFSDT  | Negative |
| Q9SUQ8 | LFSDTVLSFRKTIDQKKPCK  | Negative |
| Q9SUQ8 | FLLVLLFSDTVLSFRKTIDQ  | Negative |
| Q9SW93 | LIGTASAITCGQVDSDLTSC  | Negative |
| Q9SW93 | TCGQVDSDLTSCLG YARKGG | Negative |
| Q9SW93 | GQVDSDLTSCLG YARKGGVI | Negative |
| Q9SW93 | SSAVCFLLLLAFLIGTASAI  | Negative |
| Q9SW93 | GTASAITCGQVDSDLTSCLG  | Negative |
| Q9SW93 | ARSSAVCFLLLLAFLIGTAS  | Negative |

|        |                       |          |
|--------|-----------------------|----------|
| Q9SW93 | LLLLAFLIGTASAITCGQVD  | Negative |
| Q9SW93 | LLLAFLIGTASAITCGQVDS  | Negative |
| Q9SW93 | VCFLLLLAFLIGTASAITCG  | Negative |
| Q9SW93 | ITCGQVDSDLTSCLG YARKG | Negative |
| Q9SW93 | LLAFLIGTASAITCGQVDS   | Negative |
| Q9SW93 | VDSDLTSCLG YARKGGVIP  | Negative |
| Q9SW93 | SAITCGQVDSDLTSCLG YAR | Negative |
| Q9SW93 | LAFLIGTASAITCGQVDS    | Negative |
| Q9SW93 | FLIGTASAITCGQVDS      | Negative |
| Q9SW93 | FLLLAFLIGTASAITCGQV   | Negative |
| Q9SW93 | TASAITCGQVDSDLTSCLG Y | Negative |
| Q9SW93 | MARSSAVCFLLLLAFLIGTA  | Negative |
| Q9SW93 | CGQVDSDLTSCLG YARKGGV | Negative |
| Q9SW93 | DSDLTSCLG YARKGGVIPPG | Negative |
| Q9SW93 | IGTASAITCGQVDSDLTSC   | Negative |
| Q9SW93 | SAVCFLLLLAFLIGTASAIT  | Negative |
| Q9SW93 | ASAITCGQVDSDLTSCLG Y  | Negative |
| Q9SW93 | RSSAVCFLLLLAFLIGTASA  | Negative |
| Q9SW93 | QVDSDLTSCLG YARKGGVIP | Negative |
| Q9SW93 | AFLIGTASAITCGQVDS     | Negative |
| Q9SW93 | AVCFLLLLAFLIGTASAITC  | Negative |
| Q9SW93 | SDLTSCLG YARKGGVIPPGC | Negative |
| Q9SW93 | AITCGQVDSDLTSCLG YARK | Negative |
| Q9TRM8 | SHLLGVWLLSQLPREIPAT   | Negative |
| Q9TRM8 | QLPREIPATDDKKLKACGRD  | Negative |
| Q9TRM8 | TDDKKLKACGRDYVRLQIEV  | Negative |
| Q9TRM8 | DDKKLKACGRDYVRLQIEVC  | Negative |
| Q9TRM8 | LLSQLPREIPATDDKKLKAC  | Negative |
| Q9TRM8 | HLLGVWLLSQLPREIPATD   | Negative |
| Q9TRM8 | LRWFLSHLLGVWLLSQLPR   | Negative |
| Q9TRM8 | KKLKACGRDYVRLQIEVCGS  | Negative |
| Q9TRM8 | FLSHLLGVWLLSQLPREIP   | Negative |
| Q9TRM8 | MLRWFLSHLLGVWLLSQLP   | Negative |
| Q9TRM8 | WLLSQLPREIPATDDKKLK   | Negative |
| Q9TRM8 | IPATDDKKLKACGRDYVRLQ  | Negative |
| Q9TRM8 | PATDDKKLKACGRDYVRLQI  | Negative |
| Q9TRM8 | LPREIPATDDKKLKACGRDY  | Negative |
| Q9TRM8 | RWFLSHLLGVWLLSQLPRE   | Negative |
| Q9TRM8 | VWLLSQLPREIPATDDKKL   | Negative |
| Q9TRM8 | LLGVWLLSQLPREIPATDD   | Negative |
| Q9TRM8 | PREIPATDDKKLKACGRDYV  | Negative |
| Q9TRM8 | EIPATDDKKLKACGRDYVRL  | Negative |
| Q9TRM8 | ATDDKKLKACGRDYVRLQIE  | Negative |
| Q9TRM8 | KKLKACGRDYVRLQIEVCGSI | Negative |
| Q9TRM8 | SQLPREIPATDDKKLKACGR  | Negative |
| Q9TRM8 | REIPATDDKKLKACGRDYVR  | Negative |

|        |                      |          |
|--------|----------------------|----------|
| Q9TRM8 | DKKLKACGRDYVRLQIEVCG | Negative |
| Q9TRM8 | WFLSHLLGVWLLLSQLPREI | Negative |
| Q9TRM8 | LLLSQLPREIPATDDKKLKA | Negative |
| Q9TRM8 | LGVWLLLSQLPREIPATDDK | Negative |
| Q9TRM8 | LSHLLGVWLLLSQLPREIPA | Negative |
| Q9TRM8 | LSQLPREIPATDDKKLKACG | Negative |
| Q9TSN6 | KCEVFRELKDLKDYGGVSLP | Negative |
| Q9TSN6 | SLLLVGILFHATQAEQLTKC | Negative |
| Q9TSN6 | VGILFHATQAEQLTKCEVFR | Negative |
| Q9TSN6 | FRELKDLKDYGGVSLPEWVC | Negative |
| Q9TSN6 | QLTKCEVFRELKDLKDYGGV | Negative |
| Q9TSN6 | GILFHATQAEQLTKCEVRE  | Negative |
| Q9TSN6 | LVGILFHATQAEQLTKCEVF | Negative |
| Q9TSN6 | MMSFVSLLLVGILFHATQAE | Negative |
| Q9TSN6 | QAEQLTKCEVFRELKDLKDY | Negative |
| Q9TSN6 | ELKDLKDYGGVSLPEWVCTA | Negative |
| Q9TSN6 | HATQAEQLTKCEVFRELKDL | Negative |
| Q9TSN6 | LLLVGILFHATQAEQLTKCE | Negative |
| Q9TSN6 | ATQAEQLTKCEVFRELKDLK | Negative |
| Q9TSN6 | LLVGILFHATQAEQLTKCEV | Negative |
| Q9TSN6 | SFVSLLLVGILFHATQAEQL | Negative |
| Q9TSN6 | LFHATQAEQLTKCEVFRELK | Negative |
| Q9TSN6 | TQAEQLTKCEVFRELKDLKD | Negative |
| Q9TSN6 | VFRELKDLKDYGGVSLPEWV | Negative |
| Q9TSN6 | FHATQAEQLTKCEVFRELKD | Negative |
| Q9TSN6 | LTKCEVFRELKDLKDYGGVS | Negative |
| Q9TSN6 | EQLTKCEVFRELKDLKDYGG | Negative |
| Q9TSN6 | RELKDLKDYGGVSLPEWVCT | Negative |
| Q9TSN6 | CEVFRELKDLKDYGGVSLPE | Negative |
| Q9TSN6 | TKCEVFRELKDLKDYGGVSL | Negative |
| Q9TSN6 | MSFVSLLLVGILFHATQAEQ | Negative |
| Q9TSN6 | ILFHATQAEQLTKCEVFREL | Negative |
| Q9TSN6 | EVFRELKDLKDYGGVSLPEW | Negative |
| Q9TSN6 | AEQLTKCEVFRELKDLKDYG | Negative |
| Q9TT95 | LLSLMESPASAPVHRGRGGW | Negative |
| Q9TT95 | LMESPASAPVHRGRGGWTLN | Negative |
| Q9TT95 | SAPVHRGRGGWTLNSAGYLL | Negative |
| Q9TT95 | LAVLLSLMESPASAPVHRGR | Negative |
| Q9TT95 | RGGWTLNSAGYLLGPVLHPP | Negative |
| Q9TT95 | SLMESPASAPVHRGRGGWTL | Negative |
| Q9TT95 | VLLSLMESPASAPVHRGRGG | Negative |
| Q9TT95 | RGRGGWTLNSAGYLLGPVLH | Negative |
| Q9TT95 | GGWTLNSAGYLLGPVLHPPS | Negative |
| Q9TT95 | VPLIVLAVLLSLMESPASAP | Negative |
| Q9TT95 | MESPASAPVHRGRGGWTLNS | Negative |
| Q9TT95 | LIVLAVLLSLMESPASAPVH | Negative |



|        |                       |          |
|--------|-----------------------|----------|
| Q9TT95 | SPASAPVHRGRGGWTLNSAG  | Negative |
| Q9TT95 | LTVPLIVLAVLLSLMESPAS  | Negative |
| Q9TT95 | HRGRGGWTLNSAGYLLGPVL  | Negative |
| Q9TT95 | ASAPVHRGRGGWTLNSAGYL  | Negative |
| Q9TT95 | VHRGRGGWTLNSAGYLLGPV  | Negative |
| Q9TT95 | AVLLSLMESPASAPVHRGRG  | Negative |
| Q9TT95 | LSLMESPASAPVHRGRGGWT  | Negative |
| Q9TT95 | PVHRGRGGWTLNSAGYLLGP  | Negative |
| Q9TT95 | PASAPVHRGRGGWTLNSAGY  | Negative |
| Q9TT95 | GRGGWTLNSAGYLLGPVLHP  | Negative |
| Q9TT95 | ALTVPLIVLAVLLSLMESPA  | Negative |
| Q9TT95 | MALTVPLIVLAVLLSLMESP  | Negative |
| Q9TT95 | ESPASAPVHRGRGGWTLNSA  | Negative |
| Q9TT95 | PLIVLAVLLSLMESPASAPV  | Negative |
| Q9TT95 | TVPLIVLAVLLSLMESPASA  | Negative |
| Q9TT95 | APVHRGRGGWTLNSAGYLLG  | Negative |
| Q9TT95 | VLAVLLSLMESPASAPVHRG  | Negative |
| Q9TTE1 | PENVVVKDQHRRVDGHTLAS  | Negative |
| Q9TTE1 | HCLPENVVVKDQHRRVDGHT  | Negative |
| Q9TTE1 | VHCLPENVVVKDQHRRVDGH  | Negative |
| Q9TTE1 | FLLALGLLVAGIRSVHCLPE  | Negative |
| Q9TTE1 | IRSVHCLPENVVVKDQHRRV  | Negative |
| Q9TTE1 | MRAERTSFLLALGLLVAGIR  | Negative |
| Q9TTE1 | TSFLLALGLLVAGIRSVHCL  | Negative |
| Q9TTE1 | LVAGIRSVHCLPENVVVKDQ  | Negative |
| Q9TTE1 | AGIRSVHCLPENVVVKDQHR  | Negative |
| Q9TTE1 | LGLLVAGIRSVHCLPENVVV  | Negative |
| Q9TTE1 | RTSFLLALGLLVAGIRSVHC  | Negative |
| Q9TTE1 | RSVHCLPENVVVKDQHRRVD  | Negative |
| Q9TTE1 | SVHCLPENVVVKDQHRRVDG  | Negative |
| Q9TTE1 | GLLVAGIRSVHCLPENVVVK  | Negative |
| Q9TTE1 | ALGLLVAGIRSVHCLPENVV  | Negative |
| Q9TTE1 | RAERTSFLLALGLLVAGIRS  | Negative |
| Q9TTE1 | VVKDQHRRVDGHTLASSNTD  | Negative |
| Q9TTE1 | LLVAGIRSVHCLPENVVVKD  | Negative |
| Q9TTE1 | GIRSVHCLPENVVVKDQHRR  | Negative |
| Q9TTE1 | SFLLALGLLVAGIRSVHCLP  | Negative |
| Q9TTE1 | ENVVVKDQHRRVDGHTLASS  | Negative |
| Q9TTE1 | VVVVKDQHRRVDGHTLASSNT | Negative |
| Q9TTE1 | VAGIRSVHCLPENVVVKDQH  | Negative |
| Q9TTE1 | LLALGLLVAGIRSVHCLPEN  | Negative |
| Q9TTE1 | NVVVKDQHRRVDGHTLASSN  | Negative |
| Q9TTE1 | CLPENVVVKDQHRRVDGHTL  | Negative |
| Q9TTE1 | AERTSFLLALGLLVAGIRSV  | Negative |
| Q9TTE1 | LPENVVVKDQHRRVDGHTLA  | Negative |
| Q9TTE1 | ERTSFLLALGLLVAGIRSVH  | Negative |

|        |                      |          |
|--------|----------------------|----------|
| Q9TVX3 | IVLIMVAFFAVIITFSNIQV | Negative |
| Q9TVX3 | NIQVEGAVCNLKRCQLSCRS | Negative |
| Q9TVX3 | VCNLKRCQLSCRSLLGKC   | Negative |
| Q9TVX3 | VIITFSNIQVEGAVCNLKRC | Negative |
| Q9TVX3 | VLIMVAFFAVIITFSNIQVE | Negative |
| Q9TVX3 | AVIITFSNIQVEGAVCNLKR | Negative |
| Q9TVX3 | GAVCNLKRCQLSCRSLLG   | Negative |
| Q9TVX3 | AFFAVIITFSNIQVEGAVCN | Negative |
| Q9TVX3 | NYYKIVLIMVAFFAVIITFS | Negative |
| Q9TVX3 | IITFSNIQVEGAVCNLKRCQ | Negative |
| Q9TVX3 | MVAFFAVIITFSNIQVEGAV | Negative |
| Q9TVX3 | HNYKIVLIMVAFFAVIITF  | Negative |
| Q9TVX3 | FAVIITFSNIQVEGAVCNLK | Negative |
| Q9TVX3 | YYKIVLIMVAFFAVIITFSN | Negative |
| Q9TVX3 | IMVAFFAVIITFSNIQVEGA | Negative |
| Q9TVX3 | MHNYKIVLIMVAFFAVIIT  | Negative |
| Q9TVX3 | EGAVCNLKRCQLSCRSLLG  | Negative |
| Q9TVX3 | AVCNLKRCQLSCRSLLGK   | Negative |
| Q9TVX3 | YKIVLIMVAFFAVIITFSNI | Negative |
| Q9TVX3 | VAFFAVIITFSNIQVEGAVC | Negative |
| Q9TVX3 | SNIQVEGAVCNLKRCQLSCR | Negative |
| Q9TVX3 | KIVLIMVAFFAVIITFSNIQ | Negative |
| Q9TVX3 | ITFSNIQVEGAVCNLKRCQL | Negative |
| Q9TVX3 | FSNIQVEGAVCNLKRCQLSC | Negative |
| Q9TVX3 | VEGAVCNLKRCQLSCRSLLG | Negative |
| Q9TVX3 | QVEGAVCNLKRCQLSCRSLG | Negative |
| Q9TVX3 | TFSNIQVEGAVCNLKRCQLS | Negative |
| Q9TVX3 | IQVEGAVCNLKRCQLSCRS  | Negative |
| Q9TVX3 | LIMVAFFAVIITFSNIQVEG | Negative |
| Q9TW32 | MPSEAGKDPKITNKVFFDIE | Negative |
| Q9TW32 | PSEAGKDPKITNKVFFDIEI | Negative |
| Q9TW32 | IFVVLAIVLVTLWAMPSEAG | Negative |
| Q9TW32 | LVTLWAMPSEAGKDPKITNK | Negative |
| Q9TW32 | ITNKVFFDIEIDNKPAGRIV | Negative |
| Q9TW32 | VLAIVLVTLWAMPSEAGKDP | Negative |
| Q9TW32 | TLWAMPSEAGKDPKITNKVF | Negative |
| Q9TW32 | EAGKDPKITNKVFFDIEIDN | Negative |
| Q9TW32 | MKVIFVVLAIVLVTLWAMPS | Negative |
| Q9TW32 | VIFVVLAIVLVTLWAMPSEA | Negative |
| Q9TW32 | VLVTLWAMPSEAGKDPKITN | Negative |
| Q9TW32 | AMPSEAGKDPKITNKVFFDI | Negative |
| Q9TW32 | VTLWAMPSEAGKDPKITNKV | Negative |
| Q9TW32 | WAMPSEAGKDPKITNKVFFD | Negative |
| Q9TW32 | KDPKITNKVFFDIEIDNKP  | Negative |
| Q9TW32 | TNKVFFDIEIDNKPAGRIVF | Negative |
| Q9TW32 | IVLVTLWAMPSEAGKDPKIT | Negative |

|        |                      |          |
|--------|----------------------|----------|
| Q9TW32 | NKVFFDIEIDNKPAGRIVFG | Negative |
| Q9TW32 | KITNKVFFDIEIDNKPAGRI | Negative |
| Q9TW32 | LWAMPSEAGKDPKITNKVFF | Negative |
| Q9TW32 | FVVLAIVLVTLWAMPSEAGK | Negative |
| Q9TW32 | DPKITNKVFFDIEIDNKPAG | Negative |
| Q9TW32 | PKITNKVFFDIEIDNKPAGR | Negative |
| Q9TW32 | VVLAIVLVTLWAMPSEAGKD | Negative |
| Q9TW32 | AIVLVTLWAMPSEAGDKPI  | Negative |
| Q9TW32 | KVIFVVLAIVLVTLWAMPSE | Negative |
| Q9TW32 | SEAGKDPKITNKVFFDIEID | Negative |
| Q9TW32 | AGKDPKITNKVFFDIEIDNK | Negative |
| Q9TW32 | GKDPKITNKVFFDIEIDNKP | Negative |
| Q9U3Z3 | SVGCLLLVIVFLNLVVPTSA | Negative |
| Q9U3Z3 | GCLLLVIVFLNLVVPTSACR | Negative |
| Q9U3Z3 | SACRAEGTYCENDSQCCLNE | Negative |
| Q9U3Z3 | RVTSVGCLLLVIVFLNLVVP | Negative |
| Q9U3Z3 | NLVVPTSACRAEGTYCENDS | Negative |
| Q9U3Z3 | MFRVTSVGCLLLVIVFLNLV | Negative |
| Q9U3Z3 | IVFLNLVVPTSACRAEGTYC | Negative |
| Q9U3Z3 | TSVGCLLLVIVFLNLVVPTS | Negative |
| Q9U3Z3 | VVPTSACRAEGTYCENDSQC | Negative |
| Q9U3Z3 | EGTYCENDSQCCLNECCWGG | Negative |
| Q9U3Z3 | CLLLVIVFLNLVVPTSACRA | Negative |
| Q9U3Z3 | MMFRVTSVGCLLLVIVFLNL | Negative |
| Q9U3Z3 | FLNLVVPTSACRAEGTYCEN | Negative |
| Q9U3Z3 | VPTSACRAEGTYCENDSQCC | Negative |
| Q9U3Z3 | LVIVFLNLVVPTSACRAEGT | Negative |
| Q9U3Z3 | TSACRAEGTYCENDSQCCLN | Negative |
| Q9U3Z3 | PTSACRAEGTYCENDSQCCL | Negative |
| Q9U3Z3 | VGCLLLVIVFLNLVVPTSAC | Negative |
| Q9U3Z3 | RAEGTYCENDSQCCLNECCW | Negative |
| Q9U3Z3 | VIVFLNLVVPTSACRAEGTY | Negative |
| Q9U3Z3 | LVVPTSACRAEGTYCENDSQ | Negative |
| Q9U3Z3 | VTSVGCLLLVIVFLNLVVPT | Negative |
| Q9U3Z3 | AEGTYCENDSQCCLNECCWG | Negative |
| Q9U3Z3 | ACRAEGTYCENDSQCCLNEC | Negative |
| Q9U3Z3 | LNLVVPTSACRAEGTYCEND | Negative |
| Q9U3Z3 | LLLVIVFLNLVVPTSACRAE | Negative |
| Q9U3Z3 | FRVTSVGCLLLVIVFLNLVV | Negative |
| Q9U3Z3 | VFLNLVVPTSACRAEGTYCE | Negative |
| Q9U3Z3 | CRAEGTYCENDSQCCLNECC | Negative |
| Q9U8D2 | VMTITPDMKVEAATCEDCPE | Negative |
| Q9U8D2 | ILIALVFNVVMTITPDMKVE | Negative |
| Q9U8D2 | ATCEDCPEHCATQNARAKCD | Negative |
| Q9U8D2 | PDMKVEAATCEDCPEHCATQ | Negative |
| Q9U8D2 | TITPDMKVEAATCEDCPEHC | Negative |

|        |                       |          |
|--------|-----------------------|----------|
| Q9U8D2 | ITPDMKVEAATCEDCPEHCA  | Negative |
| Q9U8D2 | EAATCEDCPEHCATQNARAK  | Negative |
| Q9U8D2 | AATCEDCPEHCATQNARAKC  | Negative |
| Q9U8D2 | TPDMKVEAATCEDCPEHCAT  | Negative |
| Q9U8D2 | SRLYAILIALVFNVVMTIT   | Negative |
| Q9U8D2 | IILIALVFNVVMTITPDMKV  | Negative |
| Q9U8D2 | MKVEAATCEDCPEHCATQNA  | Negative |
| Q9U8D2 | KVEAATCEDCPEHCATQNAR  | Negative |
| Q9U8D2 | VVMTITPDMKVEAATCEDCP  | Negative |
| Q9U8D2 | VFNVVMTITPDMKVEAATCE  | Negative |
| Q9U8D2 | RLYAILIALVFNVVMTITP   | Negative |
| Q9U8D2 | ALVFNVVMTITPDMKVEAAT  | Negative |
| Q9U8D2 | YAILIALVFNVVMTITPDM   | Negative |
| Q9U8D2 | DMKVEAATCEDCPEHCATQN  | Negative |
| Q9U8D2 | AAILIALVFNVVMTITPDMK  | Negative |
| Q9U8D2 | LVFNVVMITITPDMKVEAATC | Negative |
| Q9U8D2 | MTITPDMKVEAATCEDCPEH  | Negative |
| Q9U8D2 | LYAILIALVFNVVMTITPD   | Negative |
| Q9U8D2 | LIALVFNVVMTITPDMKVEA  | Negative |
| Q9U8D2 | VEAATCEDCPEHCATQNARA  | Negative |
| Q9U8D2 | TCEDCPEHCATQNARAKCDN  | Negative |
| Q9U8D2 | IALVFNVVMTITPDMKVEAA  | Negative |
| Q9U8D2 | MSRLYAILIALVFNVVMTI   | Negative |
| Q9U8D2 | NVVMITITPDMKVEAATCEDC | Negative |
| Q9U8W7 | CVSLLVAGDVHHHAACSTVC  | Negative |
| Q9U8W7 | VHHHAACSTVCSLKGILDSV  | Negative |
| Q9U8W7 | AGDVHHHAACSTVCSLKGIL  | Negative |
| Q9U8W7 | SLLVAGDVHHHAACSTVCSL  | Negative |
| Q9U8W7 | GDVHHHAACSTVCSLKGILD  | Negative |
| Q9U8W7 | QLLSFLCVSLLVAGDVHHHA  | Negative |
| Q9U8W7 | MHTVLYSNMKNMFQLLSFLC  | Negative |
| Q9U8W7 | KNMFQLLSFLCVSLLVAGDV  | Negative |
| Q9U8W7 | YSNMKNMFQLLSFLCVSLLV  | Negative |
| Q9U8W7 | SFLCVSLLVAGDVHHHAACS  | Negative |
| Q9U8W7 | LLVAGDVHHHAACSTVCSLK  | Negative |
| Q9U8W7 | VSLLVAGDVHHHAACSTVCS  | Negative |
| Q9U8W7 | VAGDVHHHAACSTVCSLGI   | Negative |
| Q9U8W7 | LCVSLLVAGDVHHHAACSTV  | Negative |
| Q9U8W7 | LVAGDVHHHAACSTVCSLKG  | Negative |
| Q9U8W7 | TVLYSNMKNMFQLLSFLCVS  | Negative |
| Q9U8W7 | MKNMFQLLSFLCVSLLVAGD  | Negative |
| Q9U8W7 | LLSFLCVSLLVAGDVHHHA   | Negative |
| Q9U8W7 | LSFLCVSLLVAGDVHHHAAC  | Negative |
| Q9U8W7 | HHHAACSTVCSLKGILDSVS  | Negative |
| Q9U8W7 | LYSNMKNMFQLLSFLCVSLL  | Negative |
| Q9U8W7 | SNMKNMFQLLSFLCVSLLVA  | Negative |

|        |                      |          |
|--------|----------------------|----------|
| Q9U8W7 | MFQLLSFLCVSLLVAGDVHH | Negative |
| Q9U8W7 | NMKNMFQLLSFLCVSLLVAG | Negative |
| Q9U8W7 | NMFQLLSFLCVSLLVAGDVH | Negative |
| Q9U8W7 | VLYSNMKNMFQLLSFLCVSL | Negative |
| Q9U8W7 | HTVLYSNMKNMFQLLSFLCV | Negative |
| Q9U8W7 | FLCVSLLVAGDVHHHAACST | Negative |
| Q9U8W7 | DVHHHAACSTVCSLKGILDS | Negative |
| Q9U8W8 | QNKELCDVTSSTGLLDSIKV | Negative |
| Q9U8W8 | LTSSQNKELCDVTSSTGLLD | Negative |
| Q9U8W8 | TLIGQKYGLTSSQNKELCDV | Negative |
| Q9U8W8 | SSQNKELCDVTSSTGLLDSI | Negative |
| Q9U8W8 | GQKYGLTSSQNKELCDVTSS | Negative |
| Q9U8W8 | NLRNILFVITLIGQKYGLTS | Negative |
| Q9U8W8 | RNILFVITLIGQKYGLTSSQ | Negative |
| Q9U8W8 | CDVTSSTGLLDSIKVMASHV | Negative |
| Q9U8W8 | HNLRNILFVITLIGQKYGLT | Negative |
| Q9U8W8 | LRNILFVITLIGQKYGLTSS | Negative |
| Q9U8W8 | LCDVTSSTGLLDSIKVMASH | Negative |
| Q9U8W8 | GLTSSQNKELCDVTSSTGLL | Negative |
| Q9U8W8 | DVTSSTGLLDSIKVMASHVK | Negative |
| Q9U8W8 | KELCDVTSSTGLLDSIKVMA | Negative |
| Q9U8W8 | YGLTSSQNKELCDVTSSTGL | Negative |
| Q9U8W8 | IGQKYGLTSSQNKELCDVTS | Negative |
| Q9U8W8 | NILFVITLIGQKYGLTSSQN | Negative |
| Q9U8W8 | LFVITLIGQKYGLTSSQKE  | Negative |
| Q9U8W8 | TSSQNKELCDVTSSTGLLDS | Negative |
| Q9U8W8 | SQNKELCDVTSSTGLLDSIK | Negative |
| Q9U8W8 | LIGQKYGLTSSQNKELCDVT | Negative |
| Q9U8W8 | ITLIGQKYGLTSSQNKELCD | Negative |
| Q9U8W8 | QKYGLTSSQNKELCDVTSST | Negative |
| Q9U8W8 | ELCDVTSSTGLLDSIKVMAS | Negative |
| Q9U8W8 | VITLIGQKYGLTSSQNKELC | Negative |
| Q9U8W8 | ILFVITLIGQKYGLTSSQNK | Negative |
| Q9U8W8 | MHNLRNILFVITLIGQKYGL | Negative |
| Q9U8W8 | KYGLTSSQNKELCDVTSSTG | Negative |
| Q9U8W8 | NKELCDVTSSTGLLDSIKVM | Negative |
| Q9U8X3 | CQLQGFNCVVRSYGLPTIPC | Negative |
| Q9U8X3 | GDAYSRCQLQGFNCVVRSYG | Negative |
| Q9U8X3 | AMIGDAYSRCQLQGFNCVVR | Negative |
| Q9U8X3 | MGAMIGDAYSRCQLQGFNCV | Negative |
| Q9U8X3 | QNTLILIGCLFLMGAMIGDA | Negative |
| Q9U8X3 | MIGDAYSRCQLQGFNCVVR  | Negative |
| Q9U8X3 | NTLILIGCLFLMGAMIGDAY | Negative |
| Q9U8X3 | TLILIGCLFLMGAMIGDAYS | Negative |
| Q9U8X3 | KLQNTLILIGCLFLMGAMIG | Negative |
| Q9U8X3 | QGFNCVVRSYGLPTIPCCRG | Negative |

|        |                      |          |
|--------|----------------------|----------|
| Q9U8X3 | GCLFLMGAMIGDAYSRCQLQ | Negative |
| Q9U8X3 | CLFLMGAMIGDAYSRCQLQG | Negative |
| Q9U8X3 | YSRCQLQGFNCVVRSYGLPT | Negative |
| Q9U8X3 | LILIGCLFLMGAMIGDAYSR | Negative |
| Q9U8X3 | MKLQNTLILIGCLFLMGAMI | Negative |
| Q9U8X3 | LMGAMIGDAYSRCQLQGFNC | Negative |
| Q9U8X3 | RCQLQGFNCVVRSYGLPTIP | Negative |
| Q9U8X3 | ILIGCLFLMGAMIGDAYSRC | Negative |
| Q9U8X3 | GAMIGDAYSRCQLQGFNCVV | Negative |
| Q9U8X3 | FLMGAMIGDAYSRCQLQGFN | Negative |
| Q9U8X3 | QLQGFNCVVRSYGLPTIPCC | Negative |
| Q9U8X3 | LFLMGAMIGDAYSRCQLQGF | Negative |
| Q9U8X3 | SRCQLQGFNCVVRSYGLPTI | Negative |
| Q9U8X3 | LQGFNCVVRSYGLPTIPCCR | Negative |
| Q9U8X3 | LQNTLILIGCLFLMGAMIGD | Negative |
| Q9U8X3 | IGDAYSRCQLQGFNCVVRSY | Negative |
| Q9U8X3 | IGCLFLMGAMIGDAYSRCQL | Negative |
| Q9U8X3 | AYSRCQLQGFNCVVRSYGLP | Negative |
| Q9U8X3 | DAYSRCQLQGFNCVVRSYGL | Negative |
| Q9U943 | MGTPPHIWFLILAISSGGL  | Negative |
| Q9U943 | SSGGLSAAVGGCNHQCTPQS | Negative |
| Q9U943 | CNHQCTPQSSVFQYQKGQTY | Negative |
| Q9U943 | GGLSAAVGGCNHQCTPQSSV | Negative |
| Q9U943 | HIWFLILAISSGGLSAAVG  | Negative |
| Q9U943 | ISSGGLSAAVGGCNHQCTPQ | Negative |
| Q9U943 | QCTPQSSVFQYQKGQTYTYS | Negative |
| Q9U943 | GGCNHQCTPQSSVFQYQKGQ | Negative |
| Q9U943 | NHQCTPQSSVFQYQKGQTYT | Negative |
| Q9U943 | LLILAISSGGLSAAVGGCNH | Negative |
| Q9U943 | LSAAVGGCNHQCTPQSSVFQ | Negative |
| Q9U943 | LILAISSGGLSAAVGGCNHQ | Negative |
| Q9U943 | AISSGGLSAAVGGCNHQCTP | Negative |
| Q9U943 | PHIWFLILAISSGGLSAAV  | Negative |
| Q9U943 | SAAVGGCNHQCTPQSSVFQY | Negative |
| Q9U943 | WFLILAISSGGLSAAVGGC  | Negative |
| Q9U943 | PPHIWFLILAISSGGLSAA  | Negative |
| Q9U943 | SGGLSAAVGGCNHQCTPQSS | Negative |
| Q9U943 | TPPHIWFLILAISSGGLSA  | Negative |
| Q9U943 | GLSAAVGGCNHQCTPQSSVF | Negative |
| Q9U943 | AAVGGCNHQCTPQSSVFQYQ | Negative |
| Q9U943 | GCNHQCTPQSSVFQYQKGQT | Negative |
| Q9U943 | VGGCNHQCTPQSSVFQYQKG | Negative |
| Q9U943 | LAISSGGLSAAVGGCNHQCT | Negative |
| Q9U943 | GTPPHIWFLILAISSGGLS  | Negative |
| Q9U943 | HQCTPQSSVFQYQKGQTYTY | Negative |
| Q9U943 | FLLILAISSGGLSAAVGGCN | Negative |

|        |                       |          |
|--------|-----------------------|----------|
| Q9U943 | AVGGCNHQCTPQSSVFQYQK  | Negative |
| Q9U943 | ILAISSGGLSAAVGGCNHQC  | Negative |
| Q9UAC8 | LNKYTGCKIWCVINNECNS   | Negative |
| Q9UAC8 | GVKADNGYLLNKYTGCKIWC  | Negative |
| Q9UAC8 | IGVKADNGYLLNKYTGCKIW  | Negative |
| Q9UAC8 | KYTGCKIWCVINNECNSSEC  | Negative |
| Q9UAC8 | GCKIWCVINNECNSSECKLR  | Negative |
| Q9UAC8 | ADNGYLLNKYTGCKIWCVIN  | Negative |
| Q9UAC8 | NGYLLNKYTGCKIWCVINNE  | Negative |
| Q9UAC8 | YLLNKYTGCKIWCVINNECNS | Negative |
| Q9UAC8 | IVCSFVLIGVKADNGYLLNK  | Negative |
| Q9UAC8 | LLNKYTGCKIWCVINNECNS  | Negative |
| Q9UAC8 | IIIFLIVCSFVLIGVKADNG  | Negative |
| Q9UAC8 | FVLIGVKADNGYLLNKYTG   | Negative |
| Q9UAC8 | KADNGYLLNKYTGCKIWCVI  | Negative |
| Q9UAC8 | DNGYLLNKYTGCKIWCVINN  | Negative |
| Q9UAC8 | TGCKIWCVINNECNSSECKL  | Negative |
| Q9UAC8 | YTGCKIWCVINNECNSSECK  | Negative |
| Q9UAC8 | SFVLIGVKADNGYLLNKYTG  | Negative |
| Q9UAC8 | IIIFLIVCSFVLIGVKADNGY | Negative |
| Q9UAC8 | LIVCSFVLIGVKADNGYLLN  | Negative |
| Q9UAC8 | FLIVCSFVLIGVKADNGYLL  | Negative |
| Q9UAC8 | MKIIIFLIVCSFVLIGVKAD  | Negative |
| Q9UAC8 | KIIIFLIVCSFVLIGVKADN  | Negative |
| Q9UAC8 | VKADNGYLLNKYTGCKIWCV  | Negative |
| Q9UAC8 | GYLLNKYTGCKIWCVINNES  | Negative |
| Q9UAC8 | LIGVKADNGYLLNKYTGCKI  | Negative |
| Q9UAC8 | NKYTGCKIWCVINNECNS    | Negative |
| Q9UAC8 | VLIGVKADNGYLLNKYTGCK  | Negative |
| Q9UAC8 | CSFVLIGVKADNGYLLNKYT  | Negative |
| Q9UAC8 | VCSFVLIGVKADNGYLLNKY  | Negative |
| Q9UAC9 | NGYLLDKYTGCKVWCVINNE  | Negative |
| Q9UAC9 | YLLDKYTGCKVWCVINNECNS | Negative |
| Q9UAC9 | LDKYTGCKVWCVINNECNS   | Negative |
| Q9UAC9 | FLIVSSLLLIGVKTDNGYLL  | Negative |
| Q9UAC9 | YTGCKVWCVINNECNSSECK  | Negative |
| Q9UAC9 | GYLLDKYTGCKVWCVINNES  | Negative |
| Q9UAC9 | IGVKTDNGYLLDKYTGCKVW  | Negative |
| Q9UAC9 | GCKVWCVINNECNSSECKIR  | Negative |
| Q9UAC9 | LLDKYTGCKVWCVINNECNS  | Negative |
| Q9UAC9 | KTDNGYLLDKYTGCKVWCVI  | Negative |
| Q9UAC9 | KYTGCKVWCVINNECNSSEC  | Negative |
| Q9UAC9 | SLLLIGVKTDNGYLLDKYT   | Negative |
| Q9UAC9 | TVIFLIVSSLLLIGVKTDNG  | Negative |
| Q9UAC9 | DNGYLLDKYTGCKVWCVINN  | Negative |
| Q9UAC9 | IVSSLLLIGVKTDNGYLLDK  | Negative |

|        |                      |          |
|--------|----------------------|----------|
| Q9UAC9 | VIFLIVSSLLLIGVKTDNGY | Negative |
| Q9UAC9 | VKTDNGYLLDKYTGCKVWCV | Negative |
| Q9UAC9 | TGCKVWCVINNESCNSECKI | Negative |
| Q9UAC9 | MKTVIFLIVSSLLLIGVKTD | Negative |
| Q9UAC9 | GVKTDNGYLLDKYTGCKVWC | Negative |
| Q9UAC9 | LLLIGVKTDNGYLLDKYTG  | Negative |
| Q9UAC9 | VSSLLLIGVKTDNGYLLDKY | Negative |
| Q9UAC9 | SSLLLIGVKTDNGYLLDKYT | Negative |
| Q9UAC9 | DKYTGCKVWCVINNESCNSE | Negative |
| Q9UAC9 | LIGVKTDNGYLLDKYTGCKV | Negative |
| Q9UAC9 | LIVSSLLLIGVKTDNGYLLD | Negative |
| Q9UAC9 | TDNGYLLDKYTGCKVWCVIN | Negative |
| Q9UAC9 | LLIGVKTDNGYLLDKYTGCK | Negative |
| Q9UAC9 | KTVIFLIVSSLLLIGVKTDN | Negative |
| Q9UAD0 | FLYGIVFIALFLTVMFATQT | Negative |
| Q9UAD0 | CFTTDANMARKCRECCGGIG | Negative |
| Q9UAD0 | FLTVMFATQTDGCGPCFTTD | Negative |
| Q9UAD0 | VMFATQTDGCGPCFTTDANM | Negative |
| Q9UAD0 | ALFLTVMFATQTDGCGPCFT | Negative |
| Q9UAD0 | FTTDANMARKCRECCGGIGK | Negative |
| Q9UAD0 | TDGCGPCFTTDANMARKCRE | Negative |
| Q9UAD0 | FIALFLTVMFATQTDGCGPC | Negative |
| Q9UAD0 | VFIALFLTVMFATQTDGCGP | Negative |
| Q9UAD0 | IVFIALFLTVMFATQTDGCG | Negative |
| Q9UAD0 | MKFLYGIVFIALFLTVMFAT | Negative |
| Q9UAD0 | CGPCFTTDANMARKCRECCG | Negative |
| Q9UAD0 | MFATQTDGCGPCFTTDANMA | Negative |
| Q9UAD0 | LTVMFATQTDGCGPCFTTDA | Negative |
| Q9UAD0 | GPCFTTDANMARKCRECCGG | Negative |
| Q9UAD0 | LFLTVMFATQTDGCGPCFTT | Negative |
| Q9UAD0 | TTDANMARKCRECCGGIGKC | Negative |
| Q9UAD0 | LYGIVFIALFLTVMFATQTD | Negative |
| Q9UAD0 | TVMFATQTDGCGPCFTTDAN | Negative |
| Q9UAD0 | TQTDGCGPCFTTDANMARKC | Negative |
| Q9UAD0 | KFLYGIVFIALFLTVMFATQ | Negative |
| Q9UAD0 | YGIVFIALFLTVMFATQTDG | Negative |
| Q9UAD0 | GCGPCFTTDANMARKCRECC | Negative |
| Q9UAD0 | DGCGPCFTTDANMARKCREC | Negative |
| Q9UAD0 | PCFTTDANMARKCRECCGGI | Negative |
| Q9UAD0 | FATQTDGCGPCFTTDANMAR | Negative |
| Q9UAD0 | ATQTDGCGPCFTTDANMARK | Negative |
| Q9UAD0 | GIVFIALFLTVMFATQTDGC | Negative |
| Q9UAD0 | QTDGCGPCFTTDANMARKCR | Negative |
| Q9UAH3 | RWTITALVLLGICHLARPAY | Negative |
| Q9UAH3 | PAYHKKCGRYSYCWIPYDIE | Negative |
| Q9UAH3 | RPAYHKKCGRYSYCWIPYDI | Negative |



|        |                       |          |
|--------|-----------------------|----------|
| Q9UAH3 | HLARPAYHKKCGRYSYCWIP  | Negative |
| Q9UAH3 | LLGICHLARPAYHKKCGRYS  | Negative |
| Q9UAH3 | KCGRYSYCWIPYDIERDRRD  | Negative |
| Q9UAH3 | YHKKCGRYSYCWIPYDIERD  | Negative |
| Q9UAH3 | KCTLRWTITALVLLGICHLA  | Negative |
| Q9UAH3 | TITALVLLGICHLARPAYHK  | Negative |
| Q9UAH3 | WTITALVLLGICHLARPAYH  | Negative |
| Q9UAH3 | ICHLARPAYHKKCGRYSYCW  | Negative |
| Q9UAH3 | MKCTLRWTITALVLLGICHL  | Negative |
| Q9UAH3 | TALVLLGICHLARPA YHKKC | Negative |
| Q9UAH3 | ARPAYHKKCGRYSYCWIPYD  | Negative |
| Q9UAH3 | CHLARPAYHKKCGRYSYCW   | Negative |
| Q9UAH3 | LGICHLARPAYHKKCGRYSY  | Negative |
| Q9UAH3 | KKCGRYSYCWIPYDIERDRR  | Negative |
| Q9UAH3 | AYHKKCGRYSYCWIPYDIER  | Negative |
| Q9UAH3 | GRYSYCWIPYDIERDRRDNG  | Negative |
| Q9UAH3 | GICHLARPAYHKKCGRYSY   | Negative |
| Q9UAH3 | VLLGICHLARPAYHKKCGRY  | Negative |
| Q9UAH3 | CGRYSYCWIPYDIERDRRDN  | Negative |
| Q9UAH3 | ALVLLGICHLARPAYHKKCG  | Negative |
| Q9UAH3 | HKKCGRYSYCWIPYDIERDR  | Negative |
| Q9UAH3 | LRWTITALVLLGICHLARPA  | Negative |
| Q9UAH3 | CTLRWTITALVLLGICHLAR  | Negative |
| Q9UAH3 | LVLLGICHLARPAYHKKCGR  | Negative |
| Q9UAH3 | TLRWTITALVLLGICHLARP  | Negative |
| Q9UAH3 | LARPA YHKKCGRYSYCWIPY | Negative |
| Q9UBD3 | TAYIVEGVGSEVSHRRTCVS  | Negative |
| Q9UBD3 | SHRRTCVS LTTQRLPVSRIK | Negative |
| Q9UBD3 | VGSEVSHRRTCVS LTTQRLP | Negative |
| Q9UBD3 | GICSLTAYIVEGVGSEVSHR  | Negative |
| Q9UBD3 | VSHRRTCVS LTTQRLPVSRI | Negative |
| Q9UBD3 | LLGICSLTAYIVEGVGSEVS  | Negative |
| Q9UBD3 | ILALLGICSLTAYIVEGVGS  | Negative |
| Q9UBD3 | AYIVEGVGSEVSHRRTCVS L | Negative |
| Q9UBD3 | GSEVSHRRTCVS LTTQRLPV | Negative |
| Q9UBD3 | ICSLTAYIVEGVGSEVSHRR  | Negative |
| Q9UBD3 | EVSHRRTCVS LTTQRLPVSR | Negative |
| Q9UBD3 | RTCVS LTTQRLPVSRIKTYT | Negative |
| Q9UBD3 | RRTCVS LTTQRLPVSRIKTY | Negative |
| Q9UBD3 | LILALLGICSLTAYIVEGVG  | Negative |
| Q9UBD3 | LGICSLTAYIVEGVGSEVSH  | Negative |
| Q9UBD3 | RLILALLGICSLTAYIVEG   | Negative |
| Q9UBD3 | GVGSEVSHRRTCVS LTTQRL | Negative |
| Q9UBD3 | SLTAYIVEGVGSEVSHRRTC  | Negative |
| Q9UBD3 | YIVEGVGSEVSHRRTCVS L  | Negative |
| Q9UBD3 | EGVGSEVSHRRTCVS LTTQR | Negative |

|        |                       |          |
|--------|-----------------------|----------|
| Q9UBD3 | LLILALLGICSLTAYIVEGV  | Negative |
| Q9UBD3 | SEVSHRRTCIVSLTTQRLPVS | Negative |
| Q9UBD3 | IVEGVGSEVSHRRTCIVSLTT | Negative |
| Q9UBD3 | LTAYIVEGVGSEVSHRRTCIV | Negative |
| Q9UBD3 | HRRTCIVSLTTQRLPVSRIKT | Negative |
| Q9UBD3 | VEGVGSEVSHRRTCIVSLTTQ | Negative |
| Q9UBD3 | MRLILALLGICSLTAYIVE   | Negative |
| Q9UBD3 | CSLTAYIVEGVGSEVSHRRT  | Negative |
| Q9UBD3 | LALLGICSLTAYIVEGVGSE  | Negative |
| Q9UBP4 | RLGATLLCLLLAAAVPTAPA  | Negative |
| Q9UBP4 | TATSAPVKPGPALSYPQEEA  | Negative |
| Q9UBP4 | LAAAVPTAPAPAPTATSAPV  | Negative |
| Q9UBP4 | PTATSAPVKPGPALSYPQEE  | Negative |
| Q9UBP4 | LGATLLCLLLAAAVPTAPAP  | Negative |
| Q9UBP4 | AAVPTAPAPAPTATSAPVKP  | Negative |
| Q9UBP4 | APTATSAPVKPGPALSYPQE  | Negative |
| Q9UBP4 | LLLAAAVPTAPAPAPTATSA  | Negative |
| Q9UBP4 | APAPTATSAPVKPGPALSYP  | Negative |
| Q9UBP4 | QRLGATLLCLLLAAAVPTAP  | Negative |
| Q9UBP4 | TAPAPAPTATSAPVKPGPAL  | Negative |
| Q9UBP4 | APVKPGPALSYPQEEATLNE  | Negative |
| Q9UBP4 | GATLLCLLLAAAVPTAPAPA  | Negative |
| Q9UBP4 | ATLLCLLLAAAVPTAPAPAP  | Negative |
| Q9UBP4 | LLAAAVPTAPAPAPTATSAP  | Negative |
| Q9UBP4 | PTAPAPAPTATSAPVKPGPA  | Negative |
| Q9UBP4 | LCLLLAAAVPTAPAPAPTAT  | Negative |
| Q9UBP4 | PAPAPTATSAPVKPGPALSYP | Negative |
| Q9UBP4 | PAPTATSAPVKPGPALSYPQ  | Negative |
| Q9UBP4 | AAAVPTAPAPAPTATSAPVK  | Negative |
| Q9UBP4 | APAPAPTATSAPVKPGPALS  | Negative |
| Q9UBP4 | AVPTAPAPAPTATSAPVKPG  | Negative |
| Q9UBP4 | SAPVKPGPALSYPQEEATLN  | Negative |
| Q9UBP4 | VPTAPAPAPTATSAPVKPGP  | Negative |
| Q9UBP4 | LLCLLLAAAVPTAPAPAPTA  | Negative |
| Q9UBP4 | CLLLAAAVPTAPAPAPTATS  | Negative |
| Q9UBP4 | ATSAPVKPGPALSYPQEEAT  | Negative |
| Q9UBP4 | MQRLGATLLCLLLAAAVPTA  | Negative |
| Q9UBP4 | TSAPVKPGPALSYPQEEATL  | Negative |
| Q9UBT3 | GLSWLCSPLGALVLDFNNIR  | Negative |
| Q9UBT3 | LVLDFNNIRSSADLHGARKG  | Negative |
| Q9UBT3 | NIRSSADLHGARKGSQCLSD  | Negative |
| Q9UBT3 | LLGLSWLCSPLGALVLDFNN  | Negative |
| Q9UBT3 | FNNIRSSADLHGARKGSQCL  | Negative |
| Q9UBT3 | NNIRSSADLHGARKGSQCLS  | Negative |
| Q9UBT3 | GALVLDFNNIRSSADLHGAR  | Negative |
| Q9UBT3 | LCSPLGALVLDFNNIRSSAD  | Negative |

|        |                      |          |
|--------|----------------------|----------|
| Q9UBT3 | ADLHGARKGSQCLSDTDCNT | Negative |
| Q9UBT3 | ALVLDFNNIRSSADLHGARK | Negative |
| Q9UBT3 | PLGALVLDFNNIRSSADLHG | Negative |
| Q9UBT3 | RSSADLHGARKGSQCLSDTD | Negative |
| Q9UBT3 | SPLGALVLDFNNIRSSADLH | Negative |
| Q9UBT3 | SADLHGARKGSQCLSDTDCN | Negative |
| Q9UBT3 | LGALVLDFNNIRSSADLHGA | Negative |
| Q9UBT3 | LDNNIRSSADLHGARKGSQ  | Negative |
| Q9UBT3 | MVA AVLGLSWLCSPLGALV | Negative |
| Q9UBT3 | LGLSWLCSPLGALVLDFNNI | Negative |
| Q9UBT3 | SSADLHGARKGSQCLSDTDC | Negative |
| Q9UBT3 | IRSSADLHGARKGSQCLSDT | Negative |
| Q9UBT3 | VLDFNNIRSSADLHGARKGS | Negative |
| Q9UBT3 | LSWLCSPLGALVLDFNNIRS | Negative |
| Q9UBT3 | VAAVLLGLSWLCSPLGALVL | Negative |
| Q9UBT3 | CSPLGALVLDFNNIRSSADL | Negative |
| Q9UBT3 | DFNNIRSSADLHGARKGSQC | Negative |
| Q9UBT3 | AAVLLGLSWLCSPLGALVLD | Negative |
| Q9UBT3 | WLCSPLGALVLDFNNIRSSA | Negative |
| Q9UBT3 | SWLCSPLGALVLDFNNIRSS | Negative |
| Q9UBT3 | VLLGLSWLCSPLGALVLDFN | Negative |
| Q9UBU3 | MLWDLAMAGSSFLSPEHQR  | Negative |
| Q9UBU3 | MAGSSFLSPEHQRVQQRKES | Negative |
| Q9UBU3 | PSPGTVCSLLLLGMLWDLA  | Negative |
| Q9UBU3 | DLAMAGSSFLSPEHQRVQQR | Negative |
| Q9UBU3 | TVCSLLLLGMLWDLAMAGS  | Negative |
| Q9UBU3 | GTVCSLLLLGMLWDLAMAG  | Negative |
| Q9UBU3 | WDLAMAGSSFLSPEHQRVQ  | Negative |
| Q9UBU3 | LGMLWDLAMAGSSFLSPEH  | Negative |
| Q9UBU3 | SPGTVCSLLLLGMLWDLAM  | Negative |
| Q9UBU3 | SPEHQRVQQRKESKKPPAKL | Negative |
| Q9UBU3 | GMLWDLAMAGSSFLSPEHQ  | Negative |
| Q9UBU3 | AMAGSSFLSPEHQRVQQRKE | Negative |
| Q9UBU3 | CSLLLLGMLWDLAMAGSSF  | Negative |
| Q9UBU3 | SSFLSPEHQRVQQRKESKKP | Negative |
| Q9UBU3 | LSPEHQRVQQRKESKKPPAK | Negative |
| Q9UBU3 | VCSLLLLGMLWDLAMAGSS  | Negative |
| Q9UBU3 | LLLLGMLWDLAMAGSSFLS  | Negative |
| Q9UBU3 | PGTVCSLLLLGMLWDLAMA  | Negative |
| Q9UBU3 | LWDLAMAGSSFLSPEHQRV  | Negative |
| Q9UBU3 | SFLSPEHQRVQQRKESKKPP | Negative |
| Q9UBU3 | LDLAMAGSSFLSPEHQRVQQ | Negative |
| Q9UBU3 | MPSPGTVCSLLLLGMLWDL  | Negative |
| Q9UBU3 | FLSPEHQRVQQRKESKKPPA | Negative |
| Q9UBU3 | PEHQRVQQRKESKKPPAKLQ | Negative |
| Q9UBU3 | LLGMLWDLAMAGSSFLSPE  | Negative |

|        |                      |          |
|--------|----------------------|----------|
| Q9UBU3 | LLLGMLWLDLAMAGSSFLSP | Negative |
| Q9UBU3 | AGSSFLSPEHQRVQQRKESK | Negative |
| Q9UBU3 | LAMAGSSFLSPEHQRVQQRK | Negative |
| Q9UBU3 | GSSFLSPEHQRVQQRKESKK | Negative |
| Q9UHD0 | CVSLWLLGTILILCSVDNHG | Negative |
| Q9UHD0 | LQCVSLWLLGTILILCSVDN | Negative |
| Q9UHD0 | VDNHGLRRCLISTDMHHIEE | Negative |
| Q9UHD0 | NHGLRRCLISTDMHHIEESF | Negative |
| Q9UHD0 | LILCSVDNHGLRRCLISTDM | Negative |
| Q9UHD0 | CLISTDMHHIEESFQEIKRA | Negative |
| Q9UHD0 | ISTDMHHIEESFQEIKRAIQ | Negative |
| Q9UHD0 | RCLISTDMHHIEESFQEIKR | Negative |
| Q9UHD0 | SLWLLGTILILCSVDNHGLR | Negative |
| Q9UHD0 | LRRCLISTDMHHIEESFQEI | Negative |
| Q9UHD0 | KLQCVSLWLLGTILILCSVD | Negative |
| Q9UHD0 | LCSVDNHGLRRCLISTDMHH | Negative |
| Q9UHD0 | WLLGTILILCSVDNHGLRRC | Negative |
| Q9UHD0 | DNHGLRRCLISTDMHHIEES | Negative |
| Q9UHD0 | QCVSLWLLGTILILCSVDNH | Negative |
| Q9UHD0 | ILILCSVDNHGLRRCLISTD | Negative |
| Q9UHD0 | ILCSVDNHGLRRCLISTDMH | Negative |
| Q9UHD0 | HGLRRCLISTDMHHIEESFQ | Negative |
| Q9UHD0 | SVDNHGLRRCLISTDMHHIE | Negative |
| Q9UHD0 | LISTDMHHIEESFQEIKRAI | Negative |
| Q9UHD0 | LGTILILCSVDNHGLRRCLI | Negative |
| Q9UHD0 | MKLQCVSLWLLGTILILCSV | Negative |
| Q9UHD0 | GLRRCLISTDMHHIEESFQE | Negative |
| Q9UHD0 | CSVDNHGLRRCLISTDMHHI | Negative |
| Q9UHD0 | GTILILCSVDNHGLRRCLIS | Negative |
| Q9UHD0 | TILILCSVDNHGLRRCLIST | Negative |
| Q9UHD0 | RRCLISTDMHHIEESFQEIK | Negative |
| Q9UHD0 | LWLLGTILILCSVDNHGLRR | Negative |
| Q9UHD0 | VSLWLLGTILILCSVDNHGL | Negative |
| Q9UK55 | PGLAPSPQSPETPAPQNQTS | Negative |
| Q9UK55 | LAQVWLVPGLAPSPQSPETP | Negative |
| Q9UK55 | LVPGAPSPQSPETPAPQNNQ | Negative |
| Q9UK55 | LLAQVWLVPGLAPSPQSPET | Negative |
| Q9UK55 | QVWLVPGLAPSPQSPETPAP | Negative |
| Q9UK55 | QSPETPAPQNQTSRVVQAPK | Negative |
| Q9UK55 | VWLVPGLAPSPQSPETPAPQ | Negative |
| Q9UK55 | MKVVPSLLLSVLLAQVWLVP | Negative |
| Q9UK55 | SLLSVLLAQVWLVPGLAPS  | Negative |
| Q9UK55 | LAPSPQSPETPAPQNQTSRV | Negative |
| Q9UK55 | PETPAPQNQTSRVVQAPKEE | Negative |
| Q9UK55 | VVPSLLLSVLLAQVWLVPGL | Negative |
| Q9UK55 | LSVLLAQVWLVPGLAPSPQS | Negative |

|        |                       |          |
|--------|-----------------------|----------|
| Q9UK55 | GLAPSPQSPETPAPQNQTSR  | Negative |
| Q9UK55 | LLSVLLAQVWLVPGLAPSPQ  | Negative |
| Q9UK55 | VPSLLLSVLLAQVWLVPGLA  | Negative |
| Q9UK55 | VLLAQVWLVPGLAPSPQSPE  | Negative |
| Q9UK55 | PSLLLSVLLAQVWLVPGLAP  | Negative |
| Q9UK55 | PSPQSPETPAPQNQTSRVVQ  | Negative |
| Q9UK55 | VPGLAPSPQSPETPAPQNQT  | Negative |
| Q9UK55 | SPETPAPQNQTSRVVQAPKE  | Negative |
| Q9UK55 | PQSPETPAPQNQTSRVVQAP  | Negative |
| Q9UK55 | APSPQSPETPAPQNQTSRVV  | Negative |
| Q9UK55 | SPQSPETPAPQNQTSRVVQA  | Negative |
| Q9UK55 | SVLLAQVWLVPGLAPSPQSP  | Negative |
| Q9UK55 | AQVWLVPGLAPSPQSPETPA  | Negative |
| Q9UK55 | WLVPGLAPSPQSPETPAPQN  | Negative |
| Q9UK55 | KVVPSLLLSVLLAQVWLVPG  | Negative |
| Q9UK55 | ETPAPQNQTSRVVQAPKEEE  | Negative |
| Q9UKZ9 | ANAWAPLCLLLAAATQLSRQ  | Negative |
| Q9UKZ9 | AWAPLCLLLAAATQLSRQQS  | Negative |
| Q9UKZ9 | ATQLSRQQSPERPVFCTCGGI | Negative |
| Q9UKZ9 | QSPERPVFCTCGGILTGESGF | Negative |
| Q9UKZ9 | RQQSPERPVFCTCGGILTGES | Negative |
| Q9UKZ9 | GANAWAPLCLLLAAATQLSR  | Negative |
| Q9UKZ9 | NAWAPLCLLLAAATQLSRQQ  | Negative |
| Q9UKZ9 | LAAATQLSRQQSPERPVFCT  | Negative |
| Q9UKZ9 | SRQQSPERPVFCTCGGILTGE | Negative |
| Q9UKZ9 | ERPVFCTCGGILTGESGFIGS | Negative |
| Q9UKZ9 | RPVFCTCGGILTGESGFIGSE | Negative |
| Q9UKZ9 | TQLSRQQSPERPVFCTCGGIL | Negative |
| Q9UKZ9 | PVFCTCGGILTGESGFIGSEG | Negative |
| Q9UKZ9 | PERPVFCTCGGILTGESGFIG | Negative |
| Q9UKZ9 | VFCTCGGILTGESGFIGSEGF | Negative |
| Q9UKZ9 | CLLLAAATQLSRQQSPERP   | Negative |
| Q9UKZ9 | LLLAAATQLSRQQSPERP    | Negative |
| Q9UKZ9 | RGANAWAPLCLLLAAATQLS  | Negative |
| Q9UKZ9 | SPERPVFCTCGGILTGESGFI | Negative |
| Q9UKZ9 | QQSPERPVFCTCGGILTGESG | Negative |
| Q9UKZ9 | LLAAATQLSRQQSPERP     | Negative |
| Q9UKZ9 | WAPLCLLLAAATQLSRQQSP  | Negative |
| Q9UKZ9 | MRGANAWAPLCLLLAAATQL  | Negative |
| Q9UKZ9 | AATQLSRQQSPERPVFCTCGG | Negative |
| Q9UKZ9 | APLCLLLAAATQLSRQQSPE  | Negative |
| Q9UKZ9 | LSRQQSPERPVFCTCGGILT  | Negative |
| Q9UKZ9 | AAATQLSRQQSPERPVFCTCG | Negative |
| Q9UKZ9 | LCLLLAAATQLSRQQSPERP  | Negative |
| Q9UKZ9 | QLSRQQSPERPVFCTCGGILT | Negative |
| Q9UVI4 | AASLLVASTLAVPTSSGGSC  | Negative |

|        |                      |          |
|--------|----------------------|----------|
| Q9UVI4 | PPGGGNGGNGGNGGNGGNGY | Negative |
| Q9UVI4 | ASLLVASTLAVPTSSGGSCR | Negative |
| Q9UVI4 | VASTLAVPTSSGGSCRPRPP | Negative |
| Q9UVI4 | CRPRPPPGGGNGGNGGNGGN | Negative |
| Q9UVI4 | ASTLAVPTSSGGSCRPRPPP | Negative |
| Q9UVI4 | SLLVASTLAVPTSSGGSCR  | Negative |
| Q9UVI4 | RPPPGGGNGGNGGNGGNGGN | Negative |
| Q9UVI4 | MKFLAAASLLVASTLAVPTS | Negative |
| Q9UVI4 | TSSGGSCRPRPPPGGGNGGN | Negative |
| Q9UVI4 | PTSSGGSCRPRPPPGGGNGG | Negative |
| Q9UVI4 | AAASLLVASTLAVPTSSGGS | Negative |
| Q9UVI4 | VPTSSGGSCRPRPPPGGGNG | Negative |
| Q9UVI4 | PPPGGGNGGNGGNGGNGGNG | Negative |
| Q9UVI4 | SCRPRPPPGGGNGGNGGNGG | Negative |
| Q9UVI4 | LAVPTSSGGSCRPRPPPGGG | Negative |
| Q9UVI4 | LLVASTLAVPTSSGGSCRPR | Negative |
| Q9UVI4 | TLAVPTSSGGSCRPRPPPGG | Negative |
| Q9UVI4 | STLAVPTSSGGSCRPRPPPG | Negative |
| Q9UVI4 | LVASTLAVPTSSGGSCRPRP | Negative |
| Q9UVI4 | RPRPPPGGGNGGNGGNGGNG | Negative |
| Q9UVI4 | PRPPPGGGNGGNGGNGGNGG | Negative |
| Q9UVI4 | AVPTSSGGSCRPRPPPGGGN | Negative |
| Q9UVI4 | LAAASLLVASTLAVPTSSGG | Negative |
| Q9UVI4 | SGGSCRPRPPPGGGNGGNGG | Negative |
| Q9UVI4 | GSCRPRPPPGGGNGGNGGNG | Negative |
| Q9UVI4 | FLAAASLLVASTLAVPTSSG | Negative |
| Q9UVI4 | SSGGSCRPRPPPGGGNGGNG | Negative |
| Q9UVI4 | GGSCRPRPPPGGGNGGNGGN | Negative |
| Q9V496 | IALIGILASVLLTIAVNAEN | Negative |
| Q9V496 | VNAENACNLGCPKSDNGLLK | Negative |
| Q9V496 | AENACNLGCPKSDNGLLKYI | Negative |
| Q9V496 | LASVLLTIAVNAENACNLGC | Negative |
| Q9V496 | AVNAENACNLGCPKSDNGLL | Negative |
| Q9V496 | RMKYNIALIGILASVLLTIA | Negative |
| Q9V496 | NIALIGILASVLLTIAVNAE | Negative |
| Q9V496 | ALIGILASVLLTIAVNAENA | Negative |
| Q9V496 | LTIAVNAENACNLGCPKSDN | Negative |
| Q9V496 | NACNLGCPKSDNGLLKYIPG | Negative |
| Q9V496 | LIGILASVLLTIAVNAENAC | Negative |
| Q9V496 | VLLTIAVNAENACNLGCPKS | Negative |
| Q9V496 | LLTIAVNAENACNLGCPKSD | Negative |
| Q9V496 | ARMKYNIALIGILASVLLTI | Negative |
| Q9V496 | MKYNIALIGILASVLLTIAV | Negative |
| Q9V496 | ENACNLGCPKSDNGLLKYIP | Negative |
| Q9V496 | SVLLTIAVNAENACNLGCPK | Negative |
| Q9V496 | ASVLLTIAVNAENACNLGCP | Negative |

|        |                       |          |
|--------|-----------------------|----------|
| Q9V496 | YNIALIGILASVLLTIAVNA  | Negative |
| Q9V496 | MARMKYNIALIGILASVLLT  | Negative |
| Q9V496 | GILASVLLTIAVNAENACNL  | Negative |
| Q9V496 | NAENACNLGCPKSDNGLLKY  | Negative |
| Q9V496 | KYNIALIGILASVLLTIAVN  | Negative |
| Q9V496 | IAVNAENACNLGCPKSDNGL  | Negative |
| Q9V496 | ACNLGCPKSDNGLLKYIPGN  | Negative |
| Q9V496 | ILASVLLTIAVNAENACNLG  | Negative |
| Q9V496 | NLGCPKSDNGLLKYIPGNYY  | Negative |
| Q9V496 | TIAVNAENACNLGCPKSDNG  | Negative |
| Q9V496 | CNLGCPKSDNGLLKYIPGNY  | Negative |
| Q9VG55 | SHAKSLQGTSKLDLGNHISA  | Negative |
| Q9VG55 | VCSHAKSLQGTSKLDLGNHI  | Negative |
| Q9VG55 | TSKLDLGNHISAGSARGSL   | Negative |
| Q9VG55 | TLLIAASCYILVCSHAKSL   | Negative |
| Q9VG55 | SCYILVCSHAKSLQGTSKLD  | Negative |
| Q9VG55 | HAKSLQGTSKLDLGNHISAG  | Negative |
| Q9VG55 | LIAASCYILVCSHAKSLQGT  | Negative |
| Q9VG55 | AASCYILVCSHAKSLQGTSK  | Negative |
| Q9VG55 | AKSLQGTSKLDLGNHISAGS  | Negative |
| Q9VG55 | CGPSYCTLLLIAASCYILVC  | Negative |
| Q9VG55 | QGTSKLDLGNHISAGSARG   | Negative |
| Q9VG55 | CYILVCSHAKSLQGTSKLDL  | Negative |
| Q9VG55 | LQGTSKLDLGNHISAGSARG  | Negative |
| Q9VG55 | GTSKLDLGNHISAGSARGSL  | Negative |
| Q9VG55 | SLQGTSKLDLGNHISAGSAR  | Negative |
| Q9VG55 | YILVCSHAKSLQGTSKLDLG  | Negative |
| Q9VG55 | LLLIAASCYILVCSHAKSLQ  | Negative |
| Q9VG55 | LVC SHAKSLQGTSKLDLGNH | Negative |
| Q9VG55 | CTLLLIAASCYILVCSHAKS  | Negative |
| Q9VG55 | IAASCYILVCSHAKSLQGTS  | Negative |
| Q9VG55 | KSLQGTSKLDLGNHISAGSA  | Negative |
| Q9VG55 | CSHAKSLQGTSKLDLGNHIS  | Negative |
| Q9VG55 | GPSYCTLLLIAASCYILVCS  | Negative |
| Q9VG55 | PSYCTLLLIAASCYILVCSH  | Negative |
| Q9VG55 | SYCTLLLIAASCYILVCSHA  | Negative |
| Q9VG55 | ILVCSHAKSLQGTSKLDLGN  | Negative |
| Q9VG55 | MCGPSYCTLLLIAASCYILV  | Negative |
| Q9VG55 | ASCYILVCSHAKSLQGTSKL  | Negative |
| Q9VG55 | YCTLLLIAASCYILVCSHAK  | Negative |
| Q9VMD9 | CQGYETYQRSSFRSSSSSY   | Negative |
| Q9VMD9 | GGITLLAVAICQGYETYQR   | Negative |
| Q9VMD9 | ICQGYETYQRSSFRSSSSSS  | Negative |
| Q9VMD9 | RSSFRSSSSSYGGGQTPVQ   | Negative |
| Q9VMD9 | RALGGITLLAVAICQGYET   | Negative |
| Q9VMD9 | ETYQRSSFRSSSSSYGGGQ   | Negative |

|        |                      |          |
|--------|----------------------|----------|
| Q9VMD9 | TLLLAVAICQGYETYQRSSF | Negative |
| Q9VMD9 | SSSSSYGGGQTVPQLNSFA  | Negative |
| Q9VMD9 | MRALGGITLLLAVAICQGYE | Negative |
| Q9VMD9 | YQRSSFRSSSSSYGGGQTV  | Negative |
| Q9VMD9 | VAICQGYETYQRSSFRSSSS | Negative |
| Q9VMD9 | AVAICQGYETYQRSSFRSSS | Negative |
| Q9VMD9 | SSSSSYGGGQTVPQLNSFAS | Negative |
| Q9VMD9 | FRSSSSSYGGGQTVPQLNS  | Negative |
| Q9VMD9 | TYQRSSFRSSSSSYGGGQT  | Negative |
| Q9VMD9 | LLAVAICQGYETYQRSSFRS | Negative |
| Q9VMD9 | RSSSSSYGGGQTVPQLNSF  | Negative |
| Q9VMD9 | QGYETYQRSSFRSSSSSYG  | Negative |
| Q9VMD9 | YETYQRSSFRSSSSSYGGG  | Negative |
| Q9VMD9 | ITLLLAVAICQGYETYQRSS | Negative |
| Q9VMD9 | QRSSFRSSSSSYGGGQTVP  | Negative |
| Q9VMD9 | GYETYQRSSFRSSSSSYGG  | Negative |
| Q9VMD9 | SSFRSSSSSYGGGQTVPQL  | Negative |
| Q9VMD9 | LAVAICQGYETYQRSSFRSS | Negative |
| Q9VMD9 | SFRSSSSSYGGGQTVPQLN  | Negative |
| Q9VMD9 | AICQGYETYQRSSFRSSSSS | Negative |
| Q9VMD9 | GITLLLAVAICQGYETYQRS | Negative |
| Q9VMD9 | ALGGITLLLAVAICQGYETY | Negative |
| Q9VMD9 | LLLAVAICQGYETYQRSSFR | Negative |
| Q9VYX7 | LLAFVSAGKSRQRSPANCPT | Negative |
| Q9VYX7 | SPWIMAIGLVLLLLAFVSAG | Negative |
| Q9VYX7 | LAFVSAGKSRQRSPANCPTI | Negative |
| Q9VYX7 | KSRQRSPANCPTIKLKRQWG | Negative |
| Q9VYX7 | AFVSAGKSRQRSPANCPTIK | Negative |
| Q9VYX7 | VSAGKSRQRSPANCPTIKLK | Negative |
| Q9VYX7 | SRQRSPANCPTIKLKRQWGG | Negative |
| Q9VYX7 | FVSAGKSRQRSPANCPTIKL | Negative |
| Q9VYX7 | IMAIGLVLLLLAFVSAGKSR | Negative |
| Q9VYX7 | AIGLVLLLLAFVSAGKSRQR | Negative |
| Q9VYX7 | GKSRQRSPANCPTIKLKRQW | Negative |
| Q9VYX7 | MQPVRFGSPWIMAIGLVLLL | Negative |
| Q9VYX7 | FGSPWIMAIGLVLLLLAFVS | Negative |
| Q9VYX7 | LVLLLLAFVSAGKSRQRSPA | Negative |
| Q9VYX7 | RQRSPANCPTIKLKRQWGK  | Negative |
| Q9VYX7 | IGLVLLLLAFVSAGKSRQRS | Negative |
| Q9VYX7 | GLVLLLLAFVSAGKSRQRSP | Negative |
| Q9VYX7 | QPVRFGSPWIMAIGLVLLL  | Negative |
| Q9VYX7 | RFGSPWIMAIGLVLLLLAFV | Negative |
| Q9VYX7 | LLAFVSAGKSRQRSPANCP  | Negative |
| Q9VYX7 | GSPWIMAIGLVLLLLAFVSA | Negative |
| Q9VYX7 | WIMAIGLVLLLLAFVSAGKS | Negative |
| Q9VYX7 | PVRFGSPWIMAIGLVLLLLA | Negative |



|        |                         |          |
|--------|-------------------------|----------|
| Q9VYX7 | VRFGSPWIMAIGLVLLLLAF    | Negative |
| Q9VYX7 | SAGKSQRSPANCPITIKLKR    | Negative |
| Q9VYX7 | LLLLAFVSAGKSQRSPAN      | Negative |
| Q9VYX7 | AGKSQRSPANCPITIKLRQ     | Negative |
| Q9VYX7 | VLLLLAFVSAGKSQRSPAN     | Negative |
| Q9VYX7 | PWIMAIGLVLLLLAFVSAGK    | Negative |
| Q9W7J5 | CFITPDVKS KPCPPGQEV CY  | Negative |
| Q9W7J5 | RTCFITPDVKS KPCPPGQEV   | Negative |
| Q9W7J5 | LLTLVVVTIVCLDLGYTRTC    | Negative |
| Q9W7J5 | DVKS KPCPPGQEV CYTKTWC  | Negative |
| Q9W7J5 | CLDLGYTRTCFITPDVKS KPC  | Negative |
| Q9W7J5 | TPDVKS KPCPPGQEV CYTKT  | Negative |
| Q9W7J5 | DLGYTRTCFITPDVKS KPCP   | Negative |
| Q9W7J5 | LLTLVVVTIVCLDLGYTRT     | Negative |
| Q9W7J5 | PDVKS KPCPPGQEV CYTKTW  | Negative |
| Q9W7J5 | LTLVVVTIVCLDLGYTRTCF    | Negative |
| Q9W7J5 | TIVCLDLGYTRTCFITPDVK    | Negative |
| Q9W7J5 | FITPDVKS KPCPPGQEV CYT  | Negative |
| Q9W7J5 | IVCLDLGYTRTCFITPDVKS    | Negative |
| Q9W7J5 | LVVVVTIVCLDLGYTRTCFIT   | Negative |
| Q9W7J5 | ITPDVKS KPCPPGQEV CYTK  | Negative |
| Q9W7J5 | YTRTCFITPDVKS KPCPPGQ   | Negative |
| Q9W7J5 | VKS KPCPPGQEV CYTKTWCD  | Negative |
| Q9W7J5 | VVTIVCLDLGYTRTCFITPD    | Negative |
| Q9W7J5 | MKTL LTLVVVTIVCLDLGY    | Negative |
| Q9W7J5 | KT L LTLVVVTIVCLDLGYT   | Negative |
| Q9W7J5 | VCLDLGYTRTCFITPDVKS K   | Negative |
| Q9W7J5 | LDLGYTRTCFITPDVKS KPC   | Negative |
| Q9W7J5 | T L L LTLVVVTIVCLDLGYTR | Negative |
| Q9W7J5 | TRTCFITPDVKS KPCPPGQE   | Negative |
| Q9W7J5 | GYTRTCFITPDVKS KPCPPG   | Negative |
| Q9W7J5 | LG YTRTCFITPDVKS KPCPP  | Negative |
| Q9W7J5 | TCFITPDVKS KPCPPGQEV C  | Negative |
| Q9W7J5 | VVVVTIVCLDLGYTRTCFITP   | Negative |
| Q9W7J5 | VTIVCLDLGYTRTCFITPDV    | Negative |
| Q9XD84 | YNTVWNESTGTWVVTSELTR    | Negative |
| Q9XD84 | LTRKGGLRPRQIKRTVLAGL    | Negative |
| Q9XD84 | MNKVYNTVWNESTGTWVVT     | Negative |
| Q9XD84 | NESTGTWVVTSELTRKGGLR    | Negative |
| Q9XD84 | WVVTSELTRKGGLRPRQIKR    | Negative |
| Q9XD84 | KVYNTVWNESTGTWVVTSEL    | Negative |
| Q9XD84 | VTSELTRKGGLRPRQIKRTV    | Negative |
| Q9XD84 | TWVVTSELTRKGGLRPRQIK    | Negative |
| Q9XD84 | LRPRQIKRTVLAGLIAGLLM    | Negative |
| Q9XD84 | ELTRKGGLRPRQIKRTVLAG    | Negative |
| Q9XD84 | GGLRPRQIKRTVLAGLIAGL    | Negative |

|        |                        |          |
|--------|------------------------|----------|
| Q9XD84 | NTVWNESTGTWVVTSELTRK   | Negative |
| Q9XD84 | RKGGLRPRQIKRTVLAGLIA   | Negative |
| Q9XD84 | VWNESTGTWVVTSELTRKGG   | Negative |
| Q9XD84 | WNESTGTWVVTSELTRKGGL   | Negative |
| Q9XD84 | NKVYNTVWNESTGTWVVTSE   | Negative |
| Q9XD84 | ESTGTWVVTSELTRKGGLRP   | Negative |
| Q9XD84 | KGGLRPRQIKRTVLAGLIAG   | Negative |
| Q9XD84 | RPRQIKRTVLAGLIAGLLMP   | Negative |
| Q9XD84 | PRQIKRTVLAGLIAGLLMPS   | Negative |
| Q9XD84 | TGTWVVTSELTRKGGLRPRQ   | Negative |
| Q9XD84 | VYNTVWNESTGTWVVTSELT   | Negative |
| Q9XD84 | TSELTRKGGLRPRQIKRTVL   | Negative |
| Q9XD84 | SELTRKGGLRPRQIKRTVLA   | Negative |
| Q9XD84 | TVWNESTGTWVVTSELTRKG   | Negative |
| Q9XD84 | VVTSELTRKGGLRPRQIKRT   | Negative |
| Q9XD84 | TRKGGLRPRQIKRTVLAGLI   | Negative |
| Q9XD84 | STGTWVVTSELTRKGGLRPR   | Negative |
| Q9XD84 | GLRPRQIKRTVLAGLIAGLL   | Negative |
| Q9XD84 | GTWVVTSELTRKGGLRPRQI   | Negative |
| Q9XFS7 | VCMLVTAPMASEAAISCGAV   | Negative |
| Q9XFS7 | EGLLKLSTLVIVCMLVTAPM   | Negative |
| Q9XFS7 | SEAAISCGAVTGS LGQCYN Y | Negative |
| Q9XFS7 | CMLVTAPMASEAAISCGAVT   | Negative |
| Q9XFS7 | LVTAPMASEAAISCGAVTGS   | Negative |
| Q9XFS7 | GLLKLSTLVIVCMLVTAPMA   | Negative |
| Q9XFS7 | ASEAAISCGAVTGS LGQCYN  | Negative |
| Q9XFS7 | AAISCGAVTGS LGQCYN YLT | Negative |
| Q9XFS7 | EAAISCGAVTGS LGQCYN YL | Negative |
| Q9XFS7 | VTAPMASEAAISCGAVTGSL   | Negative |
| Q9XFS7 | IVCMLVTAPMASEAAISCGA   | Negative |
| Q9XFS7 | LLKLSTLVIVCMLVTAPMAS   | Negative |
| Q9XFS7 | MEGLLKLSTLVIVCMLVTAP   | Negative |
| Q9XFS7 | MASEAAISCGAVTGS LGQCY  | Negative |
| Q9XFS7 | CGAVTGSLGQCYN YLTRGGF  | Negative |
| Q9XFS7 | TLVIVCMLVTAPMASEAAIS   | Negative |
| Q9XFS7 | KLSTLVIVCMLVTAPMASEA   | Negative |
| Q9XFS7 | SCGAVTGSLGQCYN YLTRGG  | Negative |
| Q9XFS7 | GAVTGSLGQCYN YLTRGGFI  | Negative |
| Q9XFS7 | PMASEAAISCGAVTGSLGQC   | Negative |
| Q9XFS7 | LSTLVIVCMLVTAPMASEAA   | Negative |
| Q9XFS7 | STLVIVCMLVTAPMASEAAI   | Negative |
| Q9XFS7 | ISCGAVTGSLGQCYN YLTRG  | Negative |
| Q9XFS7 | APMASEAAISCGAVTGSLGQ   | Negative |
| Q9XFS7 | LVIVCMLVTAPMASEAAISC   | Negative |
| Q9XFS7 | LKLSTLVIVCMLVTAPMASE   | Negative |
| Q9XFS7 | AISCGAVTGSLGQCYN YLTR  | Negative |

|        |                       |          |
|--------|-----------------------|----------|
| Q9XFS7 | TAPMASEAAISCGAVTGS LG | Negative |
| Q9XFS7 | MLVTAPMASEAAISCGAVTG  | Negative |
| Q9XIV8 | VILVLAIDVTMVLGQGTRVG  | Negative |
| Q9XIV8 | VLGQGTRVGFYSSTCPRAES  | Negative |
| Q9XIV8 | IDVTMVLGQGTRVGFYSSTC  | Negative |
| Q9XIV8 | EYYHHSINKMAMFMVILVLA  | Negative |
| Q9XIV8 | YHHSINKMAMFMVILVLAID  | Negative |
| Q9XIV8 | INKMAMFMVILVLAIDVTMV  | Negative |
| Q9XIV8 | QGTRVGFYSSTCPRAESIVQ  | Negative |
| Q9XIV8 | HSINKMAMFMVILVLAIDVT  | Negative |
| Q9XIV8 | VLAIDVTMVLGQGTRVGFYS  | Negative |
| Q9XIV8 | YYHHSINKMAMFMVILVLA I | Negative |
| Q9XIV8 | LVLAI DVTMVLGQGTRVGFY | Negative |
| Q9XIV8 | DVTMVLGQGTRVGFYSSTCP  | Negative |
| Q9XIV8 | FMVILVLAIDVTMVLGQGTR  | Negative |
| Q9XIV8 | LGQGTRVGFYSSTCPRAESI  | Negative |
| Q9XIV8 | HHSINKMAMFMVILVLAIDV  | Negative |
| Q9XIV8 | GQGTRVGFYSSTCPRAESIV  | Negative |
| Q9XIV8 | AMFMVILVLAIDVTMVLGQG  | Negative |
| Q9XIV8 | MVLGQGTRVGFYSSTCPRAE  | Negative |
| Q9XIV8 | KMAMFMVILVLAIDVTMVLG  | Negative |
| Q9XIV8 | VTMVLGQGTRVGFYSSTCPR  | Negative |
| Q9XIV8 | MEYYHHSINKMAMFMVILVL  | Negative |
| Q9XIV8 | MFMVILVLAIDVTMVLGQGT  | Negative |
| Q9XIV8 | MAMFMVILVLAIDVTMVLGQ  | Negative |
| Q9XIV8 | ILVLAIDVTMVLGQGTRVGF  | Negative |
| Q9XIV8 | NKMAMFMVILVLAIDVTMVL  | Negative |
| Q9XIV8 | LAI DVTMVLGQGTRVGFYSS | Negative |
| Q9XIV8 | TMVLGQGTRVGFYSSTCPRA  | Negative |
| Q9XIV8 | SINKMAMFMVILVLAIDVTM  | Negative |
| Q9XIV8 | AIDVTMVLGQGTRVGFYSST  | Negative |
| Q9XSC9 | HLGALLFLLGGLGALANICE  | Negative |
| Q9XSC9 | VDSTLVERLGQRLLPWMDRL  | Negative |
| Q9XSC9 | GGLGALANICEITEVDSTLV  | Negative |
| Q9XSC9 | DSTLVERLGQRLLPWMDRLS  | Negative |
| Q9XSC9 | LLGGLGALANICEITEVDST  | Negative |
| Q9XSC9 | LANICEITEVDSTLVERLGQ  | Negative |
| Q9XSC9 | GALLFLLGGLGALANICEIT  | Negative |
| Q9XSC9 | TLVERLGQRLLPWMDRLSQE  | Negative |
| Q9XSC9 | CEITEVDSTLVERLGQRLLP  | Negative |
| Q9XSC9 | LGALANICEITEVDSTLVER  | Negative |
| Q9XSC9 | GALANICEITEVDSTLVERL  | Negative |
| Q9XSC9 | ITEVDSTLVERLGQRLLPWM  | Negative |
| Q9XSC9 | GLGALANICEITEVDSTLVE  | Negative |
| Q9XSC9 | ALANICEITEVDSTLVERLG  | Negative |
| Q9XSC9 | GHLGALLFLLGGLGALANIC  | Negative |

|        |                       |          |
|--------|-----------------------|----------|
| Q9XSC9 | STLVERLGQRLLPWMDRLSQ  | Negative |
| Q9XSC9 | LLFLLGGLGALANICEITEV  | Negative |
| Q9XSC9 | EITEVDSTLVERLGQRLLPW  | Negative |
| Q9XSC9 | ANICEITEVDSTLVERLGQR  | Negative |
| Q9XSC9 | ICEITEVDSTLVERLGQRLL  | Negative |
| Q9XSC9 | FLLGGLGALANICEITEVDS  | Negative |
| Q9XSC9 | EVDSTLVERLGQRLLPWMDR  | Negative |
| Q9XSC9 | LVERLGQRLLPWMDRLSQEQ  | Negative |
| Q9XSC9 | ALLFLLGGLGALANICEITE  | Negative |
| Q9XSC9 | TEVDSTLVERLGQRLLPWMD  | Negative |
| Q9XSC9 | LGGLGALANICEITEVDSTL  | Negative |
| Q9XSC9 | NICEITEVDSTLVERLGQRL  | Negative |
| Q9XSC9 | LFLGGLGALANICEITEVD   | Negative |
| Q9XSC9 | MGHLGALLFLLGGLGALANI  | Negative |
| Q9XSW3 | MSLFPSLHLLLIVMTASHT   | Negative |
| Q9XSW3 | IQNTCLVISCDSPPINGLPG  | Negative |
| Q9XSW3 | TETENCEDIQNTCLVISCDS  | Negative |
| Q9XSW3 | SLHLLLIVMTASHTETENC   | Negative |
| Q9XSW3 | MTASHTETENCEDIQNTCLV  | Negative |
| Q9XSW3 | LLLIVMTASHTETENCEDI   | Negative |
| Q9XSW3 | LLIVMTASHTETENCEDIQ   | Negative |
| Q9XSW3 | LHLLLIVMTASHTETENCE   | Negative |
| Q9XSW3 | LLIVMTASHTETENCEDIQN  | Negative |
| Q9XSW3 | HLLLIVMTASHTETENCED   | Negative |
| Q9XSW3 | DIQNTCLVISCDSPPINGLP  | Negative |
| Q9XSW3 | NTCLVISCDSPPINGLPKGD  | Negative |
| Q9XSW3 | VMTASHTETENCEDIQNTCL  | Negative |
| Q9XSW3 | IVMTASHTETENCEDIQNTC  | Negative |
| Q9XSW3 | SHTETENCEDIQNTCLVISC  | Negative |
| Q9XSW3 | TENCEDIQNTCLVISCDSPP  | Negative |
| Q9XSW3 | NCEDIQNTCLVISCDSPPIN  | Negative |
| Q9XSW3 | EDIQNTCLVISCDSPPINGL  | Negative |
| Q9XSW3 | CEDIQNTCLVISCDSPPING  | Negative |
| Q9XSW3 | LIVMTASHTETENCEDIQNT  | Negative |
| Q9XSW3 | ETENCEDIQNTCLVISCDSPP | Negative |
| Q9XSW3 | PSLHLLLIVMTASHTETEN   | Negative |
| Q9XSW3 | HTETENCEDIQNTCLVISC   | Negative |
| Q9XSW3 | TASHTETENCEDIQNTCLVI  | Negative |
| Q9XSW3 | QNTCLVISCDSPPINGLPK   | Negative |
| Q9XSW3 | ASHTETENCEDIQNTCLVIS  | Negative |
| Q9XSW3 | ENCEDIQNTCLVISCDSPPGI | Negative |
| Q9XSW3 | LFPSLHLLLIVMTASHTET   | Negative |
| Q9XSW3 | SLFPSLHLLLIVMTASHTET  | Negative |
| Q9XTN0 | VVSKKQWDGLIPVHVSYLAR  | Negative |
| Q9XTN0 | LALSSLLTEIAADCDDVSKK  | Negative |
| Q9XTN0 | LALALSSLLTEIAADCDDVVS | Negative |

|        |                       |          |
|--------|-----------------------|----------|
| Q9XTN0 | MARLHSAVVLALALSSLLTE  | Negative |
| Q9XTN0 | AVVLALALSSLLTEIAADCD  | Negative |
| Q9XTN0 | SAVVLALALSSLLTEIAADC  | Negative |
| Q9XTN0 | ARLHSAVVLALALSSLLTEI  | Negative |
| Q9XTN0 | IAADCDVVSKKQWDGLIPVH  | Negative |
| Q9XTN0 | ALALSSLLTEIAADCDVVSK  | Negative |
| Q9XTN0 | HSAVVLALALSSLLTEIAAD  | Negative |
| Q9XTN0 | KKQWDGLIPVHVSYLARPV   | Negative |
| Q9XTN0 | ALSSLLTEIAADCDVVSKKQ  | Negative |
| Q9XTN0 | EIAADCDVVSKKQWDGLIPV  | Negative |
| Q9XTN0 | VSKKQWDGLIPVHVSYLARP  | Negative |
| Q9XTN0 | SSLLTEIAADCDVVSKKQWD  | Negative |
| Q9XTN0 | DVVSKKQWDGLIPVHVSYLA  | Negative |
| Q9XTN0 | SKKQWDGLIPVHVSYLARPV  | Negative |
| Q9XTN0 | LHSAVVLALALSSLLTEIAA  | Negative |
| Q9XTN0 | LSSLLTEIAADCDVVSKKQW  | Negative |
| Q9XTN0 | LLTEIAADCDVVSKKQWDGL  | Negative |
| Q9XTN0 | DCDVVSKKQWDGLIPVHVS   | Negative |
| Q9XTN0 | LTEIAADCDVVSKKQWDGLI  | Negative |
| Q9XTN0 | TEIAADCDVVSKKQWDGLIP  | Negative |
| Q9XTN0 | VVLALALSSLLTEIAADCDV  | Negative |
| Q9XTN0 | ADCDVVSKKQWDGLIPVHVS  | Negative |
| Q9XTN0 | CDVVSKKQWDGLIPVHVS    | Negative |
| Q9XTN0 | AADCDVVSKKQWDGLIPVHV  | Negative |
| Q9XTN0 | SLLTEIAADCDVVSKKQWDG  | Negative |
| Q9XTN0 | RLHSAVVLALALSSLLTEIA  | Negative |
| Q9XY87 | GYIRGSNGCKVSCLWGNEG   | Negative |
| Q9XY87 | IDGLVNADGYIRGSNGCKVS  | Negative |
| Q9XY87 | LVNADGYIRGSNGCKVSCLW  | Negative |
| Q9XY87 | LLLLISASMLIDGLVNADGY  | Negative |
| Q9XY87 | FLLLLISASMLIDGLVNADG  | Negative |
| Q9XY87 | SASMLIDGLVNADGYIRGSN  | Negative |
| Q9XY87 | VNADGYIRGSNGCKVSCLWG  | Negative |
| Q9XY87 | DGYIRGSNGCKVSCLWGNEG  | Negative |
| Q9XY87 | ASMLIDGLVNADGYIRGSNG  | Negative |
| Q9XY87 | GLVNADGYIRGSNGCKVSCL  | Negative |
| Q9XY87 | IRGSNGCKVSCLWGNEGCKN  | Negative |
| Q9XY87 | KLFLLLLISASMLIDGLVNA  | Negative |
| Q9XY87 | RGSNGCKVSCLWGNEGCKNKE | Negative |
| Q9XY87 | NADGYIRGSNGCKVSCLWGN  | Negative |
| Q9XY87 | NGCKVSCLWGNEGCKNKECRA | Negative |
| Q9XY87 | ISASMLIDGLVNADGYIRGS  | Negative |
| Q9XY87 | LIDGLVNADGYIRGSNGCKV  | Negative |
| Q9XY87 | MKLFLLLLISASMLIDGLVN  | Negative |
| Q9XY87 | YIRGSNGCKVSCLWGNEGCKN | Negative |
| Q9XY87 | SMLIDGLVNADGYIRGSNGC  | Negative |

|        |                       |          |
|--------|-----------------------|----------|
| Q9XY87 | LLISASMLIDGLVNADGYI   | Negative |
| Q9XY87 | GCKVSLWGNCGNKECRAY    | Negative |
| Q9XY87 | MLIDGLVNADGYIRGSNGCK  | Negative |
| Q9XY87 | LFLLLISASMLIDGLVNAD   | Negative |
| Q9XY87 | GSNGCKVSLWGNCGNKEC    | Negative |
| Q9XY87 | LISASMLIDGLVNADGYIRG  | Negative |
| Q9XY87 | SNGCKVSLWGNCGNKECR    | Negative |
| Q9XY87 | DGLVNADGYIRGSNGCKVSC  | Negative |
| Q9XY87 | ADGYIRGSNGCKVSLWGN    | Negative |
| Q9XYT4 | QAVLAVPWDSDESSDERLSD  | Negative |
| Q9XYT4 | DERLSDRSDESREEPRKLVV  | Negative |
| Q9XYT4 | VCLFIVSQAVLAVPWDSDES  | Negative |
| Q9XYT4 | IVSQAVLAVPWDSDESSDER  | Negative |
| Q9XYT4 | PWDSDESSDERLSDRSDES   | Negative |
| Q9XYT4 | AVPWDSDESSDERLSDRSDE  | Negative |
| Q9XYT4 | MNKVFIIGVCLFIVSQAVLA  | Negative |
| Q9XYT4 | SDERLSDRSDESREEPRKLV  | Negative |
| Q9XYT4 | DESSDERLSDRSDESREEPR  | Negative |
| Q9XYT4 | DSDESSDERLSDRSDESREE  | Negative |
| Q9XYT4 | SDESSDERLSDRSDESREEP  | Negative |
| Q9XYT4 | VPWDSDESSDERLSDRSDES  | Negative |
| Q9XYT4 | NKVFIIGVCLFIVSQAVLAV  | Negative |
| Q9XYT4 | FIVSQAVLAVPWDSDESSDE  | Negative |
| Q9XYT4 | IGVCLFIVSQAVLAVPWSD   | Negative |
| Q9XYT4 | LFIVSQAVLAVPWDSDESSD  | Negative |
| Q9XYT4 | ESSDERLSDRSDESREEPRK  | Negative |
| Q9XYT4 | VSQAVLAVPWDSDESSDERL  | Negative |
| Q9XYT4 | VFIIGVCLFIVSQAVLAVPW  | Negative |
| Q9XYT4 | SSDERLSDRSDESREEPRKL  | Negative |
| Q9XYT4 | GVCLFIVSQAVLAVPWDSDE  | Negative |
| Q9XYT4 | LAVPWDSDESSDERLSDRSD  | Negative |
| Q9XYT4 | AVLAVPWDSDESSDERLSDR  | Negative |
| Q9XYT4 | KVFIIGVCLFIVSQAVLAVP  | Negative |
| Q9XYT4 | CLFIVSQAVLAVPWDSDESS  | Negative |
| Q9XYT4 | WDSDESSDERLSDRSDESRE  | Negative |
| Q9XYT4 | FIIGVCLFIVSQAVLAVPWD  | Negative |
| Q9XYT4 | SQAVLAVPWDSDESSDERLS  | Negative |
| Q9XYT4 | VLAVPWDSDESSDERLSDRS  | Negative |
| Q9XZH0 | AVSAAPEPRWKVFKKIEKMG  | Negative |
| Q9XZH0 | LLALS AVSAAPEPRWKVFKK | Negative |
| Q9XZH0 | FVFACLLALS AVSAAPEPRW | Negative |
| Q9XZH0 | VFACLLALS AVSAAPEPRWK | Negative |
| Q9XZH0 | IEKMGRNIRDGIVKAGPAIE  | Negative |
| Q9XZH0 | CLLALS AVSAAPEPRWKVFK | Negative |
| Q9XZH0 | KKIEKMGRNIRDGIVKAGPA  | Negative |
| Q9XZH0 | VFKKIEKMGRNIRDGIVKAG  | Negative |

|        |                       |          |
|--------|-----------------------|----------|
| Q9XZH0 | AAPEPRWKVFKKIEKMGRNI  | Negative |
| Q9XZH0 | ILSFVFACLLALSAVSAAPE  | Negative |
| Q9XZH0 | SAAPEPRWKVFKKIEKMGRN  | Negative |
| Q9XZH0 | RWKVFKKIEKMGRNIRDGIV  | Negative |
| Q9XZH0 | APEPRWKVFKKIEKMGRNIR  | Negative |
| Q9XZH0 | KVFKKIEKMGRNIRDGIVKA  | Negative |
| Q9XZH0 | EPRWKVFKKIEKMGRNIRDG  | Negative |
| Q9XZH0 | FKKIEKMGRNIRDGIVKAGP  | Negative |
| Q9XZH0 | LSAVSAAPEPRWKVFKKIEK  | Negative |
| Q9XZH0 | ALSAVSAAPEPRWKVFKKIE  | Negative |
| Q9XZH0 | FACLLALSAVSAAPEPRWKV  | Negative |
| Q9XZH0 | WKVFKKIEKMGRNIRDGIVK  | Negative |
| Q9XZH0 | VSAAPEPRWKVFKKIEKMGR  | Negative |
| Q9XZH0 | EKMGRNIRDGIVKAGPAIEV  | Negative |
| Q9XZH0 | LSFVFACLLALSAVSAAPEP  | Negative |
| Q9XZH0 | PEPRWKVFKKIEKMGRNIRD  | Negative |
| Q9XZH0 | SAVSAAPEPRWKVFKKIEKM  | Negative |
| Q9XZH0 | SFVFACLLALSAVSAAPEPR  | Negative |
| Q9XZH0 | KIEKMGRNIRDGIVKAGPAI  | Negative |
| Q9XZH0 | LALSAVSAAPEPRWKVFKKI  | Negative |
| Q9XZH0 | PRWKVFKKIEKMGRNIRDGI  | Negative |
| Q9Y0X9 | SEAGGLKKLGKKLEGAGKRV  | Negative |
| Q9Y0X9 | KLGGKKLEGAGKRVFNAAEKA | Negative |
| Q9Y0X9 | AGGLKKLGKKLEGAGKRVFN  | Negative |
| Q9Y0X9 | MAALLLVGQSEAGGLKKLGK  | Negative |
| Q9Y0X9 | EAGGLKKLGKKLEGAGKRVF  | Negative |
| Q9Y0X9 | QSEAGGLKKLGKKLEGAGKR  | Negative |
| Q9Y0X9 | VLIAMAALLLVGQSEAGGLK  | Negative |
| Q9Y0X9 | LVGQSEAGGLKKLGKKLEGA  | Negative |
| Q9Y0X9 | MNFTKIFVLIAMAALLLVGQ  | Negative |
| Q9Y0X9 | ALLLVGQSEAGGLKKLGKKL  | Negative |
| Q9Y0X9 | AMAALLLVGQSEAGGLKKLG  | Negative |
| Q9Y0X9 | FVLIAMAALLLVGQSEAGGL  | Negative |
| Q9Y0X9 | KIFVLIAMAALLLVGQSEAG  | Negative |
| Q9Y0X9 | GGLKKLGKKLEGAGKRVFNA  | Negative |
| Q9Y0X9 | NFTKIFVLIAMAALLLVGQS  | Negative |
| Q9Y0X9 | GLKKLGKKLEGAGKRVFNAA  | Negative |
| Q9Y0X9 | GQSEAGGLKKLGKKLEGAGK  | Negative |
| Q9Y0X9 | IFVLIAMAALLLVGQSEAGG  | Negative |
| Q9Y0X9 | FTKIFVLIAMAALLLVGQSE  | Negative |
| Q9Y0X9 | LLVGQSEAGGLKKLGKKLEG  | Negative |
| Q9Y0X9 | LKKLGKKLEGAGKRVFNAAE  | Negative |
| Q9Y0X9 | VGQSEAGGLKKLGKKLEGAG  | Negative |
| Q9Y0X9 | TKIFVLIAMAALLLVGQSEA  | Negative |
| Q9Y0X9 | LGKKLEGAGKRVFNAAEKAL  | Negative |
| Q9Y0X9 | GKKLEGAGKRVFNAAEKALP  | Negative |

|        |                       |          |
|--------|-----------------------|----------|
| Q9Y0X9 | KKLGKKLEGAGKRVFNAAEK  | Negative |
| Q9Y0X9 | IAMAALLLVGQSEAGGLKKL  | Negative |
| Q9Y0X9 | LLLVGQSEAGGLKKLGKKLE  | Negative |
| Q9Y0X9 | AALLLVGQSEAGGLKKLGKK  | Negative |
| Q9Y0Y0 | KLFALVLLIGLVLLTGQTEA  | Negative |
| Q9Y0Y0 | LLTGQTEAGGLKKLGKKLEG  | Negative |
| Q9Y0Y0 | GQTEAGGLKKLGKKLEGVGK  | Negative |
| Q9Y0Y0 | KLGKKLEGVGKRVFKASEKA  | Negative |
| Q9Y0Y0 | LVLLTGQTEAGGLKKLGKKL  | Negative |
| Q9Y0Y0 | AGGLKKLGKKLEGVGKRVFK  | Negative |
| Q9Y0Y0 | TEAGGLKKLGKKLEGVGKRV  | Negative |
| Q9Y0Y0 | KKLGKKLEGVGKRVFKASEK  | Negative |
| Q9Y0Y0 | GLVLLTGQTEAGGLKKLGKK  | Negative |
| Q9Y0Y0 | LVLLIGLVLLTGQTEAGGLK  | Negative |
| Q9Y0Y0 | NFNKLFALVLLIGLVLLTGQ  | Negative |
| Q9Y0Y0 | GGLKKLGKKLEGVGKRVFKA  | Negative |
| Q9Y0Y0 | LKKLGKKLEGVGKRVFKASE  | Negative |
| Q9Y0Y0 | MNFNKL FALVLLIGLVLLTG | Negative |
| Q9Y0Y0 | ALVLLIGLVLLTGQTEAGGL  | Negative |
| Q9Y0Y0 | EAGGLKKLGKKLEGVGKRVF  | Negative |
| Q9Y0Y0 | FALVLLIGLVLLTGQTEAGG  | Negative |
| Q9Y0Y0 | LGKKLEGVGKRVFKASEKAL  | Negative |
| Q9Y0Y0 | LFALVLLIGLVLLTGQTEAG  | Negative |
| Q9Y0Y0 | GLKKLGKKLEGVGKRVFKAS  | Negative |
| Q9Y0Y0 | VLLTGQTEAGGLKKLGKKLE  | Negative |
| Q9Y0Y0 | FNKLFALVLLIGLVLLTGQT  | Negative |
| Q9Y0Y0 | LIGLVLLTGQTEAGGLKKLG  | Negative |
| Q9Y0Y0 | QTEAGGLKKLGKKLEGVGKR  | Negative |
| Q9Y0Y0 | TGQTEAGGLKKLGKKLEGVG  | Negative |
| Q9Y0Y0 | IGLVLLTGQTEAGGLKKLGK  | Negative |
| Q9Y0Y0 | NKLFALVLLIGLVLLTGQTE  | Negative |
| Q9Y0Y0 | LTGQTEAGGLKKLGKKLEGV  | Negative |
| Q9Y0Y0 | LLIGLVLLTGQTEAGGLKKL  | Negative |
| Q9Y240 | EREWEGGWGGAQEEEREREA  | Negative |
| Q9Y240 | ARGAEREWEGGWGGAQEEER  | Negative |
| Q9Y240 | MQAAWLLGALVVPQLLGFGH  | Negative |
| Q9Y240 | RGAEREWEGGWGGAQEEERE  | Negative |
| Q9Y240 | LLGFGHGARGAEREWEGGWG  | Negative |
| Q9Y240 | EGGWGGAQEEEREREALMLK  | Negative |
| Q9Y240 | WLLGALVVPQLLGFGHGARG  | Negative |
| Q9Y240 | GFGHGARGAEREWEGGWGGA  | Negative |
| Q9Y240 | PQLLGFGHGARGAEREWEGG  | Negative |
| Q9Y240 | ALVVPQLLGFGHGARGAERE  | Negative |
| Q9Y240 | LVVPQLLGFGHGARGAEREW  | Negative |
| Q9Y240 | REWEGGWGGAQEEEREREAL  | Negative |
| Q9Y240 | GAEREWEGGWGGAQEEERER  | Negative |



|        |                      |          |
|--------|----------------------|----------|
| Q9Y240 | VVPQLLGFGHGARGAEREWE | Negative |
| Q9Y240 | GALVVPQLLGFGHGARGAER | Negative |
| Q9Y240 | FGHGARGAEREWEQGWGGAQ | Negative |
| Q9Y240 | QAAWLLGALVVPQLLGFGHG | Negative |
| Q9Y240 | EWEGGWGGAQEEEREREALM | Negative |
| Q9Y240 | HGARGAEREWEQGWGGAQEE | Negative |
| Q9Y240 | LLGALVVPQLLGFGHGARGA | Negative |
| Q9Y240 | AWLLGALVVPQLLGFGHGAR | Negative |
| Q9Y240 | AEREWEQGWGGAQEEERERE | Negative |
| Q9Y240 | AAWLLGALVVPQLLGFGHGA | Negative |
| Q9Y240 | GHGARGAEREWEQGWGGAQE | Negative |
| Q9Y240 | LGFGHGARGAEREWEQGWGG | Negative |
| Q9Y240 | QLLGFGHGARGAEREWEQGW | Negative |
| Q9Y240 | GARGAEREWEQGWGGAQEEE | Negative |
| Q9Y240 | WEGGWGGAQEEEREREALML | Negative |
| Q9Y240 | VPQLLGFGHGARGAEREWEG | Negative |
| Q9Y251 | LLGPLGPLSPGALPRPAQAQ | Negative |
| Q9Y251 | PGALPRPAQAQDVVDLDFFT | Negative |
| Q9Y251 | PLMLLLLGPLGPLSPGALPR | Negative |
| Q9Y251 | PLSPGALPRPAQAQDVVDLD | Negative |
| Q9Y251 | RSKPALPPPLMLLLLGPLGP | Negative |
| Q9Y251 | PPPLMLLLLGPLGPLSPGAL | Negative |
| Q9Y251 | LMLLLGPLGPLSPGALPRP  | Negative |
| Q9Y251 | ALPRPAQAQDVVDLDFFTQE | Negative |
| Q9Y251 | GALPRPAQAQDVVDLDFFTQ | Negative |
| Q9Y251 | LSPGALPRPAQAQDVVDLDF | Negative |
| Q9Y251 | GPLSPGALPRPAQAQDVVDL | Negative |
| Q9Y251 | PLGPLSPGALPRPAQAQDVV | Negative |
| Q9Y251 | LRSKPALPPPLMLLLLGPLG | Negative |
| Q9Y251 | KPALPPPLMLLLLGPLGPLS | Negative |
| Q9Y251 | SKPALPPPLMLLLLGPLGPL | Negative |
| Q9Y251 | PPLMLLLLGPLGPLSPGALP | Negative |
| Q9Y251 | LLLGPLGPLSPGALPRPAQ  | Negative |
| Q9Y251 | LPRPAQAQDVVDLDFFTQEP | Negative |
| Q9Y251 | PRPAQAQDVVDLDFFTQEPL | Negative |
| Q9Y251 | MLLSKPALPPPLMLLLLGP  | Negative |
| Q9Y251 | LLRSKPALPPPLMLLLLGPL | Negative |
| Q9Y251 | LPPPLMLLLLGPLGPLSPGA | Negative |
| Q9Y251 | MLLLGPLGPLSPGALPRPA  | Negative |
| Q9Y251 | PALPPPLMLLLLGPLGPLSP | Negative |
| Q9Y251 | LLGPLGPLSPGALPRPAQA  | Negative |
| Q9Y251 | ALPPPLMLLLLGPLGPLSPG | Negative |
| Q9Y251 | LGPLGPLSPGALPRPAQAQD | Negative |
| Q9Y251 | GPLGPLSPGALPRPAQAQDV | Negative |
| Q9Y251 | SPGALPRPAQAQDVVDLDFF | Negative |
| Q9Y258 | ISKTCFQYSHKPLPWTWVR  | Negative |

|        |                      |          |
|--------|----------------------|----------|
| Q9Y258 | HLGTATRGSDISKTCFQYS  | Negative |
| Q9Y258 | MGLSLASAVLLASLLSLHLG | Negative |
| Q9Y258 | LASLLSLHLGTATRGSDISK | Negative |
| Q9Y258 | GLSLASAVLLASLLSLHLGT | Negative |
| Q9Y258 | LGTATRGSDISKTCFQYSH  | Negative |
| Q9Y258 | VLLASLLSLHLGTATRGSDI | Negative |
| Q9Y258 | LLASLLSLHLGTATRGSDIS | Negative |
| Q9Y258 | LLSLHLGTATRGSDISKTC  | Negative |
| Q9Y258 | GSDISKTCFQYSHKPLPWT  | Negative |
| Q9Y258 | SLHLGTATRGSDISKTCFQ  | Negative |
| Q9Y258 | MMGLSLASAVLLASLLSLHL | Negative |
| Q9Y258 | RGSDISKTCFQYSHKPLPW  | Negative |
| Q9Y258 | TATRGSDISKTCFQYSHKP  | Negative |
| Q9Y258 | SDISKTCFQYSHKPLPWTW  | Negative |
| Q9Y258 | GTATRGSDISKTCFQYSHK  | Negative |
| Q9Y258 | LHLGTATRGSDISKTCFQY  | Negative |
| Q9Y258 | ASLLSLHLGTATRGSDISK  | Negative |
| Q9Y258 | SLASAVLLASLLSLHLGTAT | Negative |
| Q9Y258 | SAVLLASLLSLHLGTATRG  | Negative |
| Q9Y258 | DISKTCFQYSHKPLPWTWV  | Negative |
| Q9Y258 | LSLHLGTATRGSDISKTCF  | Negative |
| Q9Y258 | TRGSDISKTCFQYSHKPLP  | Negative |
| Q9Y258 | ATRGSDISKTCFQYSHKPL  | Negative |
| Q9Y258 | SKTCFQYSHKPLPWTWVRS  | Negative |
| Q9Y258 | SLLSLHLGTATRGSDISKTC | Negative |
| Q9Y258 | ASAVLLASLLSLHLGTATRG | Negative |
| Q9Y258 | LASAVLLASLLSLHLGTATR | Negative |
| Q9Y258 | LSLASAVLLASLLSLHLGTA | Negative |
| Q9Y2I2 | SSVMQPYPLVWGHYDLCKTQ | Negative |
| Q9Y2I2 | LSIHALWVTVSSVMQPYPLV | Negative |
| Q9Y2I2 | HYDLCKTQIYTEEGKVWDYM | Negative |
| Q9Y2I2 | SIHALWVTVSSVMQPYPLVW | Negative |
| Q9Y2I2 | VMQPYPLVWGHYDLCKTQIY | Negative |
| Q9Y2I2 | YPLVWGHYDLCKTQIYTEEG | Negative |
| Q9Y2I2 | RFLSIHALWVTVSSVMQPYP | Negative |
| Q9Y2I2 | TVSSVMQPYPLVWGHYDLCK | Negative |
| Q9Y2I2 | IHALWVTVSSVMQPYPLVWG | Negative |
| Q9Y2I2 | ALWVTVSSVMQPYPLVWGHY | Negative |
| Q9Y2I2 | MQPYPLVWGHYDLCKTQIYT | Negative |
| Q9Y2I2 | WVTVSSVMQPYPLVWGHYDL | Negative |
| Q9Y2I2 | WGHYDLCKTQIYTEEGKVWD | Negative |
| Q9Y2I2 | PLVWGHYDLCKTQIYTEEGK | Negative |
| Q9Y2I2 | FLSIHALWVTVSSVMQPYP  | Negative |
| Q9Y2I2 | YDLCKTQIYTEEGKVWDYMA | Negative |
| Q9Y2I2 | GHYDLCKTQIYTEEGKVWDY | Negative |
| Q9Y2I2 | SVMQPYPLVWGHYDLCKTQI | Negative |

|        |                       |          |
|--------|-----------------------|----------|
| Q9Y2I2 | VWGHYDLCKTQIYTEEGKVW  | Negative |
| Q9Y2I2 | VSSVMQPYPLVWGHYDLCKT  | Negative |
| Q9Y2I2 | MYLSRFLSIHALWVTVSSVM  | Negative |
| Q9Y2I2 | LSRFLSIHALWVTVSSVMQP  | Negative |
| Q9Y2I2 | QPYPLVWGHYDLCKTQIYTE  | Negative |
| Q9Y2I2 | SRFLSIHALWVTVSSVMQPY  | Negative |
| Q9Y2I2 | PYPLVWGHYDLCKTQIYTEE  | Negative |
| Q9Y2I2 | LVWGHYDLCKTQIYTEEGKV  | Negative |
| Q9Y2I2 | LWVTVSSVMQPYPLVWGHYD  | Negative |
| Q9Y2I2 | YLSRFLSIHALWVTVSSVMQ  | Negative |
| Q9Y2I2 | HALWVTVSSVMQPYPLVWGH  | Negative |
| Q9Y4X3 | SLLLSPDPTAAFLPPSTAC   | Negative |
| Q9Y4X3 | TAAFLPPSTACCTQLYRKP   | Negative |
| Q9Y4X3 | SLLLSLLLSPDPTAAFLLP   | Negative |
| Q9Y4X3 | LSPDPTAAFLPPSTACCTQ   | Negative |
| Q9Y4X3 | GPPTFCSLLLLSLLLSPDPT  | Negative |
| Q9Y4X3 | SPDPTAAFLPPSTACCTQL   | Negative |
| Q9Y4X3 | MKGPPTFCSLLLLSLLSPD   | Negative |
| Q9Y4X3 | LSLLLSPDPTAAFLPPSTA   | Negative |
| Q9Y4X3 | PSTACCTQLYRKPLSDKLLR  | Negative |
| Q9Y4X3 | TFCSLLLLSLLLSPDPTAAF  | Negative |
| Q9Y4X3 | PPSTACCTQLYRKPLSDKLL  | Negative |
| Q9Y4X3 | FLLPPSTACCTQLYRKPLSD  | Negative |
| Q9Y4X3 | LLPPSTACCTQLYRKPLSDK  | Negative |
| Q9Y4X3 | AAFLPPSTACCTQLYRKPL   | Negative |
| Q9Y4X3 | LPPSTACCTQLYRKPLSDKL  | Negative |
| Q9Y4X3 | STACCTQLYRKPLSDKLLRK  | Negative |
| Q9Y4X3 | PTFCSLLLLSLLLSPDPTAA  | Negative |
| Q9Y4X3 | LLSLLLSPDPTAAFLPPS    | Negative |
| Q9Y4X3 | FCSLLLLSLLLSPDPTAAFL  | Negative |
| Q9Y4X3 | PTAAFLPPSTACCTQLYRK   | Negative |
| Q9Y4X3 | AFLPPSTACCTQLYRKPLS   | Negative |
| Q9Y4X3 | LLSPDPTAAFLPPSTACC    | Negative |
| Q9Y4X3 | PPTFCSLLLLSLLLSPDPTA  | Negative |
| Q9Y4X3 | DPTAAFLPPSTACCTQLYR   | Negative |
| Q9Y4X3 | LLSLLLSPDPTAAFLPPST   | Negative |
| Q9Y4X3 | CSLLLLSLLLSPDPTAAFL   | Negative |
| Q9Y4X3 | LLSPDPTAAFLPPSTACCT   | Negative |
| Q9Y4X3 | PDPTAAFLPPSTACCTQLY   | Negative |
| Q9Y4X3 | KGPPTFCSLLLLSLLSPDP   | Negative |
| Q9Y5C1 | TIKLLLFIVPLVISSRIDQD  | Negative |
| Q9Y5C1 | VISSRIDQDNSSFDSLSEPEP | Negative |
| Q9Y5C1 | SFDSLSEPEKSRFAMLDDVK  | Negative |
| Q9Y5C1 | IDQDNSSFDSLSEPEKSRFA  | Negative |
| Q9Y5C1 | SRIDQDNSSFDSLSEPEKSR  | Negative |
| Q9Y5C1 | KLLLFIVPLVISSRIDQDNS  | Negative |

|        |                      |          |
|--------|----------------------|----------|
| Q9Y5C1 | MFTIKLLLFIVPLVISSRID | Negative |
| Q9Y5C1 | SSFDSLSPKSRFAMLDDV   | Negative |
| Q9Y5C1 | DNSSFDSLSPKSRFAMLD   | Negative |
| Q9Y5C1 | LFIVPLVISSRIDQDNSSFD | Negative |
| Q9Y5C1 | SPEKSRFAMLDDVKILANG  | Negative |
| Q9Y5C1 | DSLSPKSRFAMLDDVKIL   | Negative |
| Q9Y5C1 | IVPLVISSRIDQDNSSFDSL | Negative |
| Q9Y5C1 | ISSRIDQDNSSFDSLSPK   | Negative |
| Q9Y5C1 | LVISSRIDQDNSSFDSLSP  | Negative |
| Q9Y5C1 | LLLFIVPLVISSRIDQDNSS | Negative |
| Q9Y5C1 | FDSLSPKSRFAMLDDVKI   | Negative |
| Q9Y5C1 | RIDQDNSSFDSLSPKSRF   | Negative |
| Q9Y5C1 | LLFIVPLVISSRIDQDNSSF | Negative |
| Q9Y5C1 | LSPEKSRFAMLDDVKILAN  | Negative |
| Q9Y5C1 | NSSFDSLSPKSRFAMLDD   | Negative |
| Q9Y5C1 | SSRIDQDNSSFDSLSPK    | Negative |
| Q9Y5C1 | VPLVISSRIDQDNSSFDSL  | Negative |
| Q9Y5C1 | IKLLLFIPLVISSRIDQDN  | Negative |
| Q9Y5C1 | DQDNSSFDSLSPKSRFAM   | Negative |
| Q9Y5C1 | FIVPLVISSRIDQDNSSFDS | Negative |
| Q9Y5C1 | PLVISSRIDQDNSSFDSLSP | Negative |
| Q9Y5C1 | QDNSSFDSLSPKSRFAML   | Negative |
| Q9Y5C1 | SLSPEKSRFAMLDDVKILA  | Negative |
| Q9Y5Q6 | SVRLCGLEYIRTVIYICASS | Negative |
| Q9Y5Q6 | AISEVRSKESVRLCGLEYIR | Negative |
| Q9Y5Q6 | FLFSVLFAISEVRSKESVRL | Negative |
| Q9Y5Q6 | RSKESVRLCGLEYIRTVIYI | Negative |
| Q9Y5Q6 | VRLCGLEYIRTVIYICASSR | Negative |
| Q9Y5Q6 | SKESVRLCGLEYIRTVIYIC | Negative |
| Q9Y5Q6 | LFSVLFAISEVRSKESVRLC | Negative |
| Q9Y5Q6 | IFTLFLFSVLFAISEVRKE  | Negative |
| Q9Y5Q6 | GSIFTLFLFSVLFAISEVRS | Negative |
| Q9Y5Q6 | KGSIFTLFLFSVLFAISEVR | Negative |
| Q9Y5Q6 | VRSKESVRLCGLEYIRTVIY | Negative |
| Q9Y5Q6 | RLCGLEYIRTVIYICASSRW | Negative |
| Q9Y5Q6 | SVLFAISEVRSKESVRLCGL | Negative |
| Q9Y5Q6 | TLFLFSVLFAISEVRSKESV | Negative |
| Q9Y5Q6 | CGLEYIRTVIYICASSRWRR | Negative |
| Q9Y5Q6 | MKGSIFTLFLFSVLFAISEV | Negative |
| Q9Y5Q6 | FTLFLFSVLFAISEVRSKES | Negative |
| Q9Y5Q6 | KESVRLCGLEYIRTVIYICA | Negative |
| Q9Y5Q6 | FSVLFAISEVRSKESVRLCG | Negative |
| Q9Y5Q6 | LCGLEYIRTVIYICASSRWR | Negative |
| Q9Y5Q6 | LFAISEVRSKESVRLCGLEY | Negative |
| Q9Y5Q6 | SEVRSKESVRLCGLEYIRTV | Negative |
| Q9Y5Q6 | EVRSKESVRLCGLEYIRTVI | Negative |

|        |                      |          |
|--------|----------------------|----------|
| Q9Y5Q6 | FAISEVRSKESVRLCGLEYI | Negative |
| Q9Y5Q6 | VLFAISEVRSKESVRLCGLE | Negative |
| Q9Y5Q6 | GLEYIRTVIYICASSRWRRH | Negative |
| Q9Y5Q6 | SIFTLFLFSVLFAISEVRSK | Negative |
| Q9Y5Q6 | ISEVRSKESVRLCGLEYIRT | Negative |
| Q9Y5Q6 | ESVRLCGLEYIRTVIYICAS | Negative |
| Q9YGG9 | IFVSFGLLVVFLSLSGAEDD | Negative |
| Q9YGG9 | EDDSDCPSDWSSNGRFCYKL | Negative |
| Q9YGG9 | DWSSNGRFCYKLFQQKMKWA | Negative |
| Q9YGG9 | FIFVSFGLLVVFLSLSGAED | Negative |
| Q9YGG9 | SGAEDDSDCPSDWSSNGRFC | Negative |
| Q9YGG9 | LLVVFLSLSGAEDDSDCPSD | Negative |
| Q9YGG9 | LVVFLSLSGAEDDSDCPSDW | Negative |
| Q9YGG9 | FVSFGLLVVFLSLSGAEDDS | Negative |
| Q9YGG9 | GRFIFVSFGLLVVFLSLSGA | Negative |
| Q9YGG9 | AEDDSDCPSDWSSNGRFCYK | Negative |
| Q9YGG9 | SFGLLVVFLSLSGAEDDSDC | Negative |
| Q9YGG9 | FLSLSGAEDDSDCPSDWSSN | Negative |
| Q9YGG9 | GAEDDSDCPSDWSSNGRFCY | Negative |
| Q9YGG9 | PSDWSSNGRFCYKLFQQKMK | Negative |
| Q9YGG9 | SDCPSDWSSNGRFCYKLFQQ | Negative |
| Q9YGG9 | LSLSGAEDDSDCPSDWSSNG | Negative |
| Q9YGG9 | DDSDCPSDWSSNGRFCYKLF | Negative |
| Q9YGG9 | SDWSSNGRFCYKLFQQKMKW | Negative |
| Q9YGG9 | FGLLVVFLSLSGAEDDSDCP | Negative |
| Q9YGG9 | CPSDWSSNGRFCYKLFQQKM | Negative |
| Q9YGG9 | MGRFIFVSFGLLVVFLSLSG | Negative |
| Q9YGG9 | DCPSDWSSNGRFCYKLFQQK | Negative |
| Q9YGG9 | GLLVVFLSLSGAEDDSDCPS | Negative |
| Q9YGG9 | SLSGAEDDSDCPSDWSSNGR | Negative |
| Q9YGG9 | VFLSLSGAEDDSDCPSDWSS | Negative |
| Q9YGG9 | LSGAEDDSDCPSDWSSNGRF | Negative |
| Q9YGG9 | VVFLSLSGAEDDSDCPSDWS | Negative |
| Q9YGG9 | DSDCPSDWSSNGRFCYKLFQ | Negative |
| Q9YGG9 | RFIFVSFGLLVVFLSLSGAE | Negative |
| Q9YGI4 | CLNCPEMFCGKFQICRNGEK | Negative |
| Q9YGI4 | PEMFCGKFQICRNGEKICFK | Negative |
| Q9YGI4 | TLTCLNCPEMFCGKFQICRN | Negative |
| Q9YGI4 | LGYTLTCLNCPEMFCGKFQI | Negative |
| Q9YGI4 | LLTLVVVTIVCLDLGYTLTC | Negative |
| Q9YGI4 | DLGYTLTCLNCPEMFCGKFQ | Negative |
| Q9YGI4 | YTLTCLNCPEMFCGKFQICR | Negative |
| Q9YGI4 | GYTLTCLNCPEMFCGKFQIC | Negative |
| Q9YGI4 | MKTLLTLVVVTIVCLDLGY  | Negative |
| Q9YGI4 | VCLDLGYTLTCLNCPEMFCG | Negative |
| Q9YGI4 | VVVTIVCLDLGYTLTCLNCP | Negative |

|        |                       |          |
|--------|-----------------------|----------|
| Q9YGI4 | LTCLNCPMFCEGKFQICRNG  | Negative |
| Q9YGI4 | LLLTLVVVTIVCLDLGYTLT  | Negative |
| Q9YGI4 | IVCLDLGYTLTCLNCPMFCE  | Negative |
| Q9YGI4 | TCLNCPMFCEGKFQICRNGE  | Negative |
| Q9YGI4 | EMFCEGKFQICRNGEKICFKK | Negative |
| Q9YGI4 | CPEMFCEGKFQICRNGEKICF | Negative |
| Q9YGI4 | CLDLGYTLTCLNCPMFCEGK  | Negative |
| Q9YGI4 | VVTIVCLDLGYTLTCLNCP   | Negative |
| Q9YGI4 | LDLGYTLTCLNCPMFCEGKF  | Negative |
| Q9YGI4 | NCPMFCEGKFQICRNGEKIC  | Negative |
| Q9YGI4 | VTIVCLDLGYTLTCLNCP    | Negative |
| Q9YGI4 | TIVCLDLGYTLTCLNCPMF   | Negative |
| Q9YGI4 | LNCPMFCEGKFQICRNGEKI  | Negative |
| Q9YGI4 | MCEGKFQICRNGEKICFKKL  | Negative |
| Q9YGI4 | LTLVVVTIVCLDLGYTLTCL  | Negative |
| Q9YGI4 | LVVVVTIVCLDLGYTLTCLN  | Negative |
| Q9YGI4 | KTLLLTLLVVVTIVCLDLGYT | Negative |
| Q9YGI4 | TLLLTLLVVVTIVCLDLGYTL | Negative |
| Q9YGI4 | FYTCPNSETCPDGKNICVKR  | Negative |
| Q9YGI4 | LLTLVVVTIVCLDLGYTMQC  | Negative |
| Q9YGI4 | TLLLTLLVVVTIVCLDLGYTM | Negative |
| Q9YGI4 | LDLGYTMQCKTCSFYTCPN   | Negative |
| Q9YGI4 | LTLVVVTIVCLDLGYTMQCK  | Negative |
| Q9YGI4 | TCSFYTCPNSETCPDGKNIC  | Negative |
| Q9YGI4 | YTCPNSETCPDGKNICVKRS  | Negative |
| Q9YGI4 | LVVVVTIVCLDLGYTMQCKTC | Negative |
| Q9YGI4 | TIVCLDLGYTMQCKTCSFYT  | Negative |
| Q9YGI4 | CKTCSFYTCPNSETCPDGKN  | Negative |
| Q9YGI4 | GYTMQCKTCSFYTCPNSETC  | Negative |
| Q9YGI4 | KTCSFYTCPNSETCPDGKNI  | Negative |
| Q9YGI4 | YTMQCKTCSFYTCPNSETCP  | Negative |
| Q9YGI4 | CSFYTCPNSETCPDGKNICV  | Negative |
| Q9YGI4 | MKTLLLTLLVVVTIVCLDLGY | Negative |
| Q9YGI4 | SFYTCPNSETCPDGKNICVK  | Negative |
| Q9YGI4 | MQCKTCSFYTCPNSETCPDG  | Negative |
| Q9YGI4 | LLLTLVVVTIVCLDLGYTMQ  | Negative |
| Q9YGI4 | DLGYTMQCKTCSFYTCPNSE  | Negative |
| Q9YGI4 | QCKTCSFYTCPNSETCPDGK  | Negative |
| Q9YGI4 | CLDLGYTMQCKTCSFYTCPN  | Negative |
| Q9YGI4 | VTIVCLDLGYTMQCKTCSFY  | Negative |
| Q9YGI4 | KTLLLTLLVVVTIVCLDLGYT | Negative |
| Q9YGI4 | TMQCKTCSFYTCPNSETCPD  | Negative |
| Q9YGI4 | VVVVTIVCLDLGYTMQCKTCS | Negative |
| Q9YGI4 | VVTIVCLDLGYTMQCKTCSF  | Negative |
| Q9YGI4 | VCLDLGYTMQCKTCSFYTCP  | Negative |
| Q9YGI4 | LGYTMQCKTCSFYTCPNSET  | Negative |

|        |                       |          |
|--------|-----------------------|----------|
| Q9YGJ0 | IVCLDLGYTMQCKTCSFYTC  | Negative |
| Q9YGN4 | PSGWSSYEGHCYKLFNQSQ   | Negative |
| Q9YGN4 | LLVVFVSLSGTGADCPGWS   | Negative |
| Q9YGN4 | TGADCPSGWSSYEGHCYKLF  | Negative |
| Q9YGN4 | GRFIFVSFGLLVFVLSLST   | Negative |
| Q9YGN4 | VFVLSLSTGADCPSGWSSYE  | Negative |
| Q9YGN4 | FVLSLSTGADCPSGWSSYEG  | Negative |
| Q9YGN4 | LSGTGADCPSGWSSYEGHCY  | Negative |
| Q9YGN4 | SGWSSYEGHCYKLFNQSQW   | Negative |
| Q9YGN4 | GTGADCPSGWSSYEGHCYKL  | Negative |
| Q9YGN4 | VLSLSTGADCPSGWSSYEGH  | Negative |
| Q9YGN4 | IFVSFGLLVFVLSLSTGAD   | Negative |
| Q9YGN4 | GWSSYEGHCYKLFNQSQWA   | Negative |
| Q9YGN4 | SFGLLVFVLSLSTGADCP    | Negative |
| Q9YGN4 | VFVLSLSTGADCPSGWSSY   | Negative |
| Q9YGN4 | GADCPSGWSSYEGHCYKLFN  | Negative |
| Q9YGN4 | VSFGLLVFVLSLSTGADCP   | Negative |
| Q9YGN4 | GLLVFVLSLSTGADCPSGW   | Negative |
| Q9YGN4 | DCPSGWSSYEGHCYKLFNQ   | Negative |
| Q9YGN4 | SLSLSTGADCPSGWSSYEGHC | Negative |
| Q9YGN4 | SLSTGADCPSGWSSYEGHCYK | Negative |
| Q9YGN4 | SSYEGHCYKLFNQSQWAHA   | Negative |
| Q9YGN4 | WSSYEGHCYKLFNQSQWAH   | Negative |
| Q9YGN4 | ADCPSGWSSYEGHCYKLFNQ  | Negative |
| Q9YGN4 | FIFVSFGLLVFVLSLSTGA   | Negative |
| Q9YGN4 | FVSFGLLVFVLSLSTGADC   | Negative |
| Q9YGN4 | RFIFVSFGLLVFVLSLSTG   | Negative |
| Q9YGN4 | LVFVLSLSTGADCPSGWSS   | Negative |
| Q9YGN4 | CPSGWSSYEGHCYKLFNQSQ  | Negative |
| Q9YGN4 | MGRFIFVSFGLLVFVLSLSTG | Negative |
| Q9YGN5 | GWGSNNGHCYQAFNQRMTE   | Negative |
| Q9YGN5 | LSLSTGADFFCPSGWGSNN   | Negative |
| Q9YGN5 | FFCPSGWGSNNGHCYQAFNQ  | Negative |
| Q9YGN5 | IFVSFGLLVFVLSLSTGAD   | Negative |
| Q9YGN5 | SLSTGADFFCPSGWGSNNGHC | Negative |
| Q9YGN5 | VFLSLSTGADFFCPSGWGS   | Negative |
| Q9YGN5 | VVFLSLSTGADFFCPSGWG   | Negative |
| Q9YGN5 | PSGWGSNNGHCYQAFNQRM   | Negative |
| Q9YGN5 | GADFFCPSGWGSNNGHCYQA  | Negative |
| Q9YGN5 | GRFIFVSFGLLVFVLSLSTG  | Negative |
| Q9YGN5 | FCPSGWGSNNGHCYQAFNQ   | Negative |
| Q9YGN5 | GTGADFFCPSGWGSNNGHCY  | Negative |
| Q9YGN5 | FLSLSTGADFFCPSGWGSN   | Negative |
| Q9YGN5 | GLLVFVLSLSTGADFFCPS   | Negative |
| Q9YGN5 | TGADFFCPSGWGSNNGHCYQ  | Negative |
| Q9YGN5 | MGRFIFVSFGLLVFVLSLSTG | Negative |

|        |                       |          |
|--------|-----------------------|----------|
| Q9YGN5 | FVSFGLLVVFLSLSGTGADF  | Negative |
| Q9YGN5 | LSGTGADFFCPSGWGSNNGH  | Negative |
| Q9YGN5 | CPSGWGSNNGHCYQAFNQRM  | Negative |
| Q9YGN5 | SLSGTGADFFCPSGWGSNNG  | Negative |
| Q9YGN5 | VSFGLLVVFLSLSGTGADFF  | Negative |
| Q9YGN5 | DFFCPSGWGSNNGHCYQAFN  | Negative |
| Q9YGN5 | SGWGSNNGHCYQAFNQRMWTW | Negative |
| Q9YGN5 | FIFVSFGLLVVFLSLSGTGA  | Negative |
| Q9YGN5 | ADFFCPSGWGSNNGHCYQAF  | Negative |
| Q9YGN5 | LVVFLSLSGTGADFFCPSGW  | Negative |
| Q9YGN5 | RFIFVSFGLLVVFLSLSGTG  | Negative |
| Q9YGN5 | LLVVFLSLSGTGADFFCPSG  | Negative |
| Q9YGN5 | SFGLLVVFLSLSGTGADFFC  | Negative |
| Q9YGP1 | FLSLSGAKGSCCTNDSLPMN  | Negative |
| Q9YGP1 | LLVVFLSLSGAKGSCCTNDS  | Negative |
| Q9YGP1 | LSGAKGSCCTNDSLPMNGMC  | Negative |
| Q9YGP1 | FVSFGLLVVFLSLSGAKGSC  | Negative |
| Q9YGP1 | MGRFIFVSFGLLVVFLSLSG  | Negative |
| Q9YGP1 | GAKGSCCTNDSLPMNGMCYK  | Negative |
| Q9YGP1 | TNDSLPMNGMCYKIFDEPKT  | Negative |
| Q9YGP1 | DSLPMNGMCYKIFDEPKTWE  | Negative |
| Q9YGP1 | CCTNDSLPMNGMCYKIFDEP  | Negative |
| Q9YGP1 | NDSLPMNGMCYKIFDEPKTW  | Negative |
| Q9YGP1 | FIFVSFGLLVVFLSLSGAKG  | Negative |
| Q9YGP1 | GSCCTNDSLPMNGMCYKIFD  | Negative |
| Q9YGP1 | SGAKGSCCTNDSLPMNGMCY  | Negative |
| Q9YGP1 | SFGLLVVFLSLSGAKGSCCT  | Negative |
| Q9YGP1 | LVVFLSLSGAKGSCCTNDSL  | Negative |
| Q9YGP1 | AKGSCCTNDSLPMNGMCYKI  | Negative |
| Q9YGP1 | IFVSFGLLVVFLSLSGAKGS  | Negative |
| Q9YGP1 | SLSGAKGSCCTNDSLPMNGM  | Negative |
| Q9YGP1 | SLPMNGMCYKIFDEPKTWED  | Negative |
| Q9YGP1 | GRFIFVSFGLLVVFLSLSGA  | Negative |
| Q9YGP1 | RFIFVSFGLLVVFLSLSGAK  | Negative |
| Q9YGP1 | VSFGLLVVFLSLSGAKGSCC  | Negative |
| Q9YGP1 | VVFLSLSGAKGSCCTNDSL   | Negative |
| Q9YGP1 | KGSCCTNDSLPMNGMCYKIF  | Negative |
| Q9YGP1 | LSLSGAKGSCCTNDSLPMNG  | Negative |
| Q9YGP1 | CTNDSLPMNGMCYKIFDEPK  | Negative |
| Q9YGP1 | SCCTNDSLPMNGMCYKIFDE  | Negative |
| Q9YGP1 | VFLSLSGAKGSCCTNDSLPM  | Negative |
| Q9YGP1 | GLLVVFLSLSGAKGSCCTND  | Negative |
| Q9YH85 | VVTVRHRAHAMASLYPFWPN  | Negative |
| Q9YH85 | RSLLSAWAALLVTVRHRAH   | Negative |
| Q9YH85 | LVVTVRHRAHAMASLYPFWP  | Negative |
| Q9YH85 | ASLYPFWPNDTKTPKVDDGS  | Negative |



|        |                      |          |
|--------|----------------------|----------|
| Q9YH85 | LLVVTVRHRAHAMASLYPFW | Negative |
| Q9YH85 | YPFWPNDTKTPKVDDGSSSE | Negative |
| Q9YH85 | AALLVVTVRHRAHAMASLYP | Negative |
| Q9YH85 | HAMASLYPFWPNDTKTPKVD | Negative |
| Q9YH85 | HRAHAMASLYPFWPNDTKTP | Negative |
| Q9YH85 | LSAWAALLVVTVRHRAHAMA | Negative |
| Q9YH85 | SAWAALLVVTVRHRAHAMAS | Negative |
| Q9YH85 | TRSLLSAWAALLVVTVRHRA | Negative |
| Q9YH85 | TVRHRAHAMASLYPFWPNDT | Negative |
| Q9YH85 | NTRSLLSAWAALLVVTVRHR | Negative |
| Q9YH85 | LYPFWPNDTKTPKVDDGSSS | Negative |
| Q9YH85 | RAHAMASLYPFWPNDTKTPK | Negative |
| Q9YH85 | SLLSAWAALLVVTVRHRAHA | Negative |
| Q9YH85 | LLSAWAALLVVTVRHRAHAM | Negative |
| Q9YH85 | ALLVVTVRHRAHAMASLYPF | Negative |
| Q9YH85 | VTVRHRAHAMASLYPFWPND | Negative |
| Q9YH85 | AHAMASLYPFWPNDTKTPKV | Negative |
| Q9YH85 | SLYPFWPNDTKTPKVDDGSS | Negative |
| Q9YH85 | AMASLYPFWPNDTKTPKVDD | Negative |
| Q9YH85 | AWAALLVVTVRHRAHAMASL | Negative |
| Q9YH85 | RHRAHAMASLYPFWPNDTKT | Negative |
| Q9YH85 | PFWPNDTKTPKVDDGSSSEI | Negative |
| Q9YH85 | MASLYPFWPNDTKTPKVDDG | Negative |
| Q9YH85 | MNTRSLLSAWAALLVVTVRH | Negative |
| Q9YH85 | VRHRAHAMASLYPFWPNDTK | Negative |
| Q9YI92 | DWSSYEGHCYRVFQKEMTWE | Negative |
| Q9YI92 | LLVVFVSLSGTGADCPSDWS | Negative |
| Q9YI92 | VVFVSLSGTGADCPSDWSSY | Negative |
| Q9YI92 | DCPSDWSSYEGHCYRVFQKE | Negative |
| Q9YI92 | PSDWSSYEGHCYRVFQKEMT | Negative |
| Q9YI92 | FLSFGLLVVFVSLSGTGADC | Negative |
| Q9YI92 | SGTGADCPSDWSSYEGHCYR | Negative |
| Q9YI92 | ADCPSDWSSYEGHCYRVFQK | Negative |
| Q9YI92 | SSYEGHCYRVFQKEMTWEDA | Negative |
| Q9YI92 | FVSLSGTGADCPSDWSSYEG | Negative |
| Q9YI92 | GTGADCPSDWSSYEGHCYRV | Negative |
| Q9YI92 | WSSYEGHCYRVFQKEMTWED | Negative |
| Q9YI92 | GRFIFLSFGLLVVFVSLSGT | Negative |
| Q9YI92 | CPSDWSSYEGHCYRVFQKEM | Negative |
| Q9YI92 | GADCPSDWSSYEGHCYRVFQ | Negative |
| Q9YI92 | SLSGTGADCPSDWSSYEGHC | Negative |
| Q9YI92 | IFLSFGLLVVFVSLSGTGAD | Negative |
| Q9YI92 | SDWSSYEGHCYRVFQKEMTW | Negative |
| Q9YI92 | LVVFVSLSGTGADCPSDWSS | Negative |
| Q9YI92 | GLLVVFVSLSGTGADCPSDW | Negative |
| Q9YI92 | VSLSGTGADCPSDWSSYEGH | Negative |

|        |                      |          |
|--------|----------------------|----------|
| Q9YI92 | MGRFIFLSFGLLVVFVSLSG | Negative |
| Q9YI92 | FIFLSFGLLVVFVSLSGTGA | Negative |
| Q9YI92 | RFIFLSFGLLVVFVSLSGTG | Negative |
| Q9YI92 | VFVSLSGTGADCPSDWSSYE | Negative |
| Q9YI92 | TGADCPSDWSSYEGHCYRVF | Negative |
| Q9YI92 | LSGTGADCPSDWSSYEGHCY | Negative |
| Q9YI92 | SFGLLVVFVSLSGTGADCPS | Negative |
| Q9YI92 | LSFGLLVVFVSLSGTGADCP | Negative |
| Q9Z0J8 | NQWLAAVLLSLCSCLPAGQS | Negative |
| Q9Z0J8 | QWLAAVLLSLCSCLPAGQSV | Negative |
| Q9Z0J8 | AGQSVDFPWAAVDNMLVRKG | Negative |
| Q9Z0J8 | ACCSNQWLAAVLLSLCSCLP | Negative |
| Q9Z0J8 | GQSVDFPWAAVDNMLVRKGD | Negative |
| Q9Z0J8 | SCLPAGQSVDFPWAAVDNML | Negative |
| Q9Z0J8 | LCSCLPAGQSVDFPWAAVDN | Negative |
| Q9Z0J8 | SNQWLAAVLLSLCSCLPAGQ | Negative |
| Q9Z0J8 | CLPAGQSVDFPWAAVDNMLV | Negative |
| Q9Z0J8 | CSNQWLAAVLLSLCSCLPAG | Negative |
| Q9Z0J8 | VLLSLCSCLPAGQSVDFPWA | Negative |
| Q9Z0J8 | QSVDFPWAAVDNMLVRKGDT | Negative |
| Q9Z0J8 | LLSLCSCLPAGQSVDFPWAA | Negative |
| Q9Z0J8 | QGACCSNQWLAAVLLSLCSC | Negative |
| Q9Z0J8 | WLAAVLLSLCSCLPAGQSV  | Negative |
| Q9Z0J8 | LLAQGACCSNQWLAAVLLSL | Negative |
| Q9Z0J8 | LSLCSCLPAGQSVDFPWAAV | Negative |
| Q9Z0J8 | LPAGQSVDFPWAAVDNMLVR | Negative |
| Q9Z0J8 | PAGQSVDFPWAAVDNMLVRK | Negative |
| Q9Z0J8 | LAQGACCSNQWLAAVLLSLC | Negative |
| Q9Z0J8 | LAAVLLSLCSCLPAGQSVDF | Negative |
| Q9Z0J8 | CCSNQWLAAVLLSLCSCLP  | Negative |
| Q9Z0J8 | MVLLAQGACCSNQWLAAVLL | Negative |
| Q9Z0J8 | SLCSCLPAGQSVDFPWAAVD | Negative |
| Q9Z0J8 | AAVLLSLCSCLPAGQSVDFP | Negative |
| Q9Z0J8 | VLLAQGACCSNQWLAAVLLS | Negative |
| Q9Z0J8 | CSCLPAGQSVDFPWAAVDNM | Negative |
| Q9Z0J8 | AQGACCSNQWLAAVLLSLCS | Negative |
| Q9Z0J8 | GACCSNQWLAAVLLSLCSCL | Negative |
| Q9Z0K8 | AVYEHAVILPKDTLLPVSHS | Negative |
| Q9Z0K8 | LCVLKASSLDTFLAAVYEHA | Negative |
| Q9Z0K8 | WWLACAAAFSALCVLKASSL | Negative |
| Q9Z0K8 | LAAVYEHAVILPKDTLLPVS | Negative |
| Q9Z0K8 | FLAAVYEHAVILPKDTLLPV | Negative |
| Q9Z0K8 | CVLKASSLDTFLAAVYEHAV | Negative |
| Q9Z0K8 | AFSALCVLKASSLDTFLAAV | Negative |
| Q9Z0K8 | SLDTFLAAVYEHAVILPKDT | Negative |
| Q9Z0K8 | LDTFLAAVYEHAVILPKDTL | Negative |

|        |                      |          |
|--------|----------------------|----------|
| Q9Z0K8 | MGMSWWLACAAAFSALCVLK | Negative |
| Q9Z0K8 | SALCVLKASSLDTFLAAVYE | Negative |
| Q9Z0K8 | MSWWLACAAAFSALCVLKAS | Negative |
| Q9Z0K8 | ASSLDTFLAAVYEHAVILPK | Negative |
| Q9Z0K8 | VLKASSLDTFLAAVYEHAVI | Negative |
| Q9Z0K8 | LKASSLDTFLAAVYEHAVIL | Negative |
| Q9Z0K8 | FSALCVLKASSLDTFLAAVY | Negative |
| Q9Z0K8 | AAAFSALCVLKASSLDTFLA | Negative |
| Q9Z0K8 | GMSWWLACAAAFSALCVLKA | Negative |
| Q9Z0K8 | AAFSALCVLKASSLDTFLAA | Negative |
| Q9Z0K8 | ACAAAFSALCVLKASSLDTF | Negative |
| Q9Z0K8 | TFLAAVYEHAVILPKDTLLP | Negative |
| Q9Z0K8 | SWWLACAAAFSALCVLKASS | Negative |
| Q9Z0K8 | WLACAAAFSALCVLKASSLD | Negative |
| Q9Z0K8 | KASSLDTFLAAVYEHAVILP | Negative |
| Q9Z0K8 | DTFLAAVYEHAVILPKDTLL | Negative |
| Q9Z0K8 | ALCVLKASSLDTFLAAVYEH | Negative |
| Q9Z0K8 | SSLDTFLAAVYEHAVILPKD | Negative |
| Q9Z0K8 | LACAAAFSALCVLKASSLDT | Negative |
| Q9Z0K8 | AAVYEHAVILPKDTLLPVSH | Negative |
| Q9Z0L3 | GAHALDTPNPQELPPGLSKN | Negative |
| Q9Z0L3 | PPGLSKNINITFFNGVFKNV | Negative |
| Q9Z0L3 | PGLSKNINITFFNGVFKNVE | Negative |
| Q9Z0L3 | NPQELPPGLSKNINITFFNG | Negative |
| Q9Z0L3 | PQELPPGLSKNINITFFNGV | Negative |
| Q9Z0L3 | QELPPGLSKNINITFFNGVF | Negative |
| Q9Z0L3 | APCVGAHALDTPNPQELPPG | Negative |
| Q9Z0L3 | LDTPNPQELPPGLSKNINIT | Negative |
| Q9Z0L3 | MVGMLMAPCVGAHALDTPNP | Negative |
| Q9Z0L3 | GMLMAPCVGAHALDTPNPQE | Negative |
| Q9Z0L3 | ALDTPNPQELPPGLSKNINI | Negative |
| Q9Z0L3 | TPNPQELPPGLSKNINITFF | Negative |
| Q9Z0L3 | MLMAPCVGAHALDTPNPQEL | Negative |
| Q9Z0L3 | IMLLMVGMLMAPCVGAHALD | Negative |
| Q9Z0L3 | LPPGLSKNINITFFNGVFKN | Negative |
| Q9Z0L3 | PCVGAHALDTPNPQELPPGL | Negative |
| Q9Z0L3 | CVGAHALDTPNPQELPPGLS | Negative |
| Q9Z0L3 | LMVGMLMAPCVGAHALDTPN | Negative |
| Q9Z0L3 | ELPPGLSKNINITFFNGVFK | Negative |
| Q9Z0L3 | AHALDTPNPQELPPGLSKNI | Negative |
| Q9Z0L3 | VGAHALDTPNPQELPPGLSK | Negative |
| Q9Z0L3 | HALDTPNPQELPPGLSKNIN | Negative |
| Q9Z0L3 | VGMLMAPCVGAHALDTPNPQ | Negative |
| Q9Z0L3 | DTPNPQELPPGLSKNITF   | Negative |
| Q9Z0L3 | LMAPCVGAHALDTPNPQELP | Negative |
| Q9Z0L3 | MAPCVGAHALDTPNPQELPP | Negative |

|        |                      |          |
|--------|----------------------|----------|
| Q9Z0L3 | MIMLLMVGMLMAPCVGAHAL | Negative |
| Q9Z0L3 | LLMVGMLMAPCVGAHALDTP | Negative |
| Q9Z0L3 | PNPQELPPGLSKNINITFFN | Negative |
| Q9Z0M9 | WVLLLYVHVILARATSAPQT | Negative |
| Q9Z0M9 | VHVILARATSAPQTTATVLT | Negative |
| Q9Z0M9 | HCWTAGPSSWWVLLLYVHVI | Negative |
| Q9Z0M9 | TSAPQTTATVLTGSSKDPCS | Negative |
| Q9Z0M9 | CWTAGPSSWWVLLLYVHVIL | Negative |
| Q9Z0M9 | ILARATSAPQTTATVLTGSS | Negative |
| Q9Z0M9 | LYVHVILARATSAPQTTATV | Negative |
| Q9Z0M9 | VILARATSAPQTTATVLTGS | Negative |
| Q9Z0M9 | MTMRHCWTAGPSSWWVLLLY | Negative |
| Q9Z0M9 | SSWWVLLLYVHVILARATSA | Negative |
| Q9Z0M9 | GPSSWWVLLLYVHVILARAT | Negative |
| Q9Z0M9 | RHCWTAGPSSWWVLLLYVHV | Negative |
| Q9Z0M9 | AGPSSWWVLLLYVHVILARA | Negative |
| Q9Z0M9 | MRHCWTAGPSSWWVLLLYVH | Negative |
| Q9Z0M9 | WTAGPSSWWVLLLYVHVILA | Negative |
| Q9Z0M9 | ARATSAPQTTATVLTGSSKD | Negative |
| Q9Z0M9 | TMRHCWTAGPSSWWVLLLYV | Negative |
| Q9Z0M9 | RATSAPQTTATVLTGSSKDP | Negative |
| Q9Z0M9 | ATSAPQTTATVLTGSSKDPC | Negative |
| Q9Z0M9 | SWWVLLLYVHVILARATSAP | Negative |
| Q9Z0M9 | LLLYVHVILARATSAPQTTA | Negative |
| Q9Z0M9 | HVILARATSAPQTTATVLTG | Negative |
| Q9Z0M9 | TAGPSSWWVLLLYVHVILAR | Negative |
| Q9Z0M9 | YVHVILARATSAPQTTATVL | Negative |
| Q9Z0M9 | SAPQTTATVLTGSSKDPCSS | Negative |
| Q9Z0M9 | PSSWWVLLLYVHVILARATS | Negative |
| Q9Z0M9 | VLLLYVHVILARATSAPQTT | Negative |
| Q9Z0M9 | LARATSAPQTTATVLTGSSK | Negative |
| Q9Z0M9 | LLYVHVILARATSAPQTTAT | Negative |
| Q9Z4I3 | FVALAMIGSVFAAEPAAEAK | Negative |
| Q9Z4I3 | AMIGSVFAAEPAAEAKVAEF | Negative |
| Q9Z4I3 | VFAAEPAAEAKVAEFSGNAA | Negative |
| Q9Z4I3 | IGSVFAAEPAAEAKVAEFSG | Negative |
| Q9Z4I3 | KALVFFVALAMIGSVFAAEP | Negative |
| Q9Z4I3 | AAEPAAEAKVAEFSGNAAVT | Negative |
| Q9Z4I3 | EFSGNAAVTFGFDLDTVKAG | Negative |
| Q9Z4I3 | AEFGNAAVTFGFDLDTVKA  | Negative |
| Q9Z4I3 | MIGSVFAAEPAAEAKVAEFS | Negative |
| Q9Z4I3 | SVFAAEPAAEAKVAEFSGNA | Negative |
| Q9Z4I3 | MKKALVFFVALAMIGSVFAA | Negative |
| Q9Z4I3 | ALAMIGSVFAAEPAAEAKVA | Negative |
| Q9Z4I3 | VFFVALAMIGSVFAAEPAAE | Negative |
| Q9Z4I3 | FFVALAMIGSVFAAEPAAEA | Negative |

|        |                      |          |
|--------|----------------------|----------|
| Q9Z4I3 | AEPAAEAKVAEFSGNAAVTF | Negative |
| Q9Z4I3 | AEAKVAEFSGNAAVTFGFDL | Negative |
| Q9Z4I3 | KVAEFSGNAAVTFGFDLDTV | Negative |
| Q9Z4I3 | AAEAKVAEFSGNAAVTFGFD | Negative |
| Q9Z4I3 | FAAEPAAEAKVAEFSGNAAV | Negative |
| Q9Z4I3 | VALAMIGSVFAAEPAAEAKV | Negative |
| Q9Z4I3 | ALVFFVALAMIGSVFAAEPA | Negative |
| Q9Z4I3 | VAEFSGNAAVTFGFDLDTVK | Negative |
| Q9Z4I3 | EAKVAEFSGNAAVTFGFDLD | Negative |
| Q9Z4I3 | LAMIGSVFAAEPAAEAKVAE | Negative |
| Q9Z4I3 | AKVAEFSGNAAVTFGFDLDT | Negative |
| Q9Z4I3 | GSVFAAEPAAEAKVAEFSGN | Negative |
| Q9Z4I3 | PAAEAKVAEFSGNAAVTFGF | Negative |
| Q9Z4I3 | EPAAEAKVAEFSGNAAVTFG | Negative |
| Q9Z4I3 | KKALVFFVALAMIGSVFAAE | Negative |
| Q9Z4N3 | LISSAWATETVNIHERVNNA | Negative |
| Q9Z4N3 | VLASLLGFGLISSAWATETV | Negative |
| Q9Z4N3 | SLLGFGLISSAWATETVNIH | Negative |
| Q9Z4N3 | KNIVLASLLGFGLISSAWAT | Negative |
| Q9Z4N3 | ATETVNIHERVNNAQAPAHQ | Negative |
| Q9Z4N3 | ISSAWATETVNIHERVNNAQ | Negative |
| Q9Z4N3 | ERVNNAQAPAHQMMSAAAPV | Negative |
| Q9Z4N3 | VNIHERVNNAQAPAHQMMSA | Negative |
| Q9Z4N3 | MKNIVLASLLGFGLISSAWA | Negative |
| Q9Z4N3 | TETVNIHERVNNAQAPAHQM | Negative |
| Q9Z4N3 | VNNAQAPAHQMMSAAAPVGI | Negative |
| Q9Z4N3 | SSAWATETVNIHERVNNAQA | Negative |
| Q9Z4N3 | LGFGLISSAWATETVNIHER | Negative |
| Q9Z4N3 | NIHERVNNAQAPAHQMMSAA | Negative |
| Q9Z4N3 | WATETVNIHERVNNAQAPAH | Negative |
| Q9Z4N3 | NIVLASLLGFGLISSAWATE | Negative |
| Q9Z4N3 | ASLLGFGLISSAWATETVNI | Negative |
| Q9Z4N3 | AWATETVNIHERVNNAQAPA | Negative |
| Q9Z4N3 | HERVNNAQAPAHQMMSAAAP | Negative |
| Q9Z4N3 | ETVNIHERVNNAQAPAHQMQ | Negative |
| Q9Z4N3 | IVLASLLGFGLISSAWATET | Negative |
| Q9Z4N3 | IHERVNNAQAPAHQMMSAAA | Negative |
| Q9Z4N3 | TVNIHERVNNAQAPAHQMMS | Negative |
| Q9Z4N3 | LLGFGLISSAWATETVNIHE | Negative |
| Q9Z4N3 | FGLISSAWATETVNIHERVN | Negative |
| Q9Z4N3 | GLISSAWATETVNIHERVNN | Negative |
| Q9Z4N3 | GFGLISSAWATETVNIHERV | Negative |
| Q9Z4N3 | RVNNAQAPAHQMMSAAAPVG | Negative |
| Q9Z4N3 | SAWATETVNIHERVNNAQAP | Negative |
| Q9Z4P0 | VLSSGTAMAKTPDMGSFHAD | Negative |
| Q9Z4P0 | MALVVLSSGTAMAKTPDMGS | Negative |

|        |                      |          |
|--------|----------------------|----------|
| Q9Z4P0 | LSSGTAMAKTPDMGSFHADM | Negative |
| Q9Z4P0 | YLVSAMALVVLSSGTAMAKT | Negative |
| Q9Z4P0 | MKLKYLVSAMALVVLSSGTA | Negative |
| Q9Z4P0 | MAKTPDMGSFHADMGSCQSC | Negative |
| Q9Z4P0 | SFHADMGSCQSCHAKPIKVT | Negative |
| Q9Z4P0 | LVVLSSGTAMAKTPDMGSFH | Negative |
| Q9Z4P0 | KTPDMGSFHADMGSCQSCHA | Negative |
| Q9Z4P0 | LKYLVSAMALVVLSSGTAMA | Negative |
| Q9Z4P0 | GTAMAKTPDMGSFHADMGSC | Negative |
| Q9Z4P0 | AKTPDMGSFHADMGSCQSCH | Negative |
| Q9Z4P0 | VSAMALVVLSSGTAMAKTPD | Negative |
| Q9Z4P0 | KYLVSAMALVVLSSGTAMAK | Negative |
| Q9Z4P0 | GSFHADMGSCQSCHAKPIKV | Negative |
| Q9Z4P0 | SGTAMAKTPDMGSFHADMGS | Negative |
| Q9Z4P0 | AMAKTPDMGSFHADMGSCQS | Negative |
| Q9Z4P0 | DMGSFHADMGSCQSCHAKPI | Negative |
| Q9Z4P0 | AMALVVLSSGTAMAKTPDMG | Negative |
| Q9Z4P0 | FHADMGSCQSCHAKPIKVD  | Negative |
| Q9Z4P0 | PDMGSFHADMGSCQSCHAKP | Negative |
| Q9Z4P0 | MGSFHADMGSCQSCHAKPIK | Negative |
| Q9Z4P0 | TAMAKTPDMGSFHADMGSCQ | Negative |
| Q9Z4P0 | ALVVLSSGTAMAKTPDMGSF | Negative |
| Q9Z4P0 | LVSAMALVVLSSGTAMAKTP | Negative |
| Q9Z4P0 | SSGTAMAKTPDMGSFHADMG | Negative |
| Q9Z4P0 | VVLSSGTAMAKTPDMGSFHA | Negative |
| Q9Z4P0 | TPDMGSFHADMGSCQSCHAK | Negative |
| Q9Z4P0 | KLKYLVSAMALVVLSSGTAM | Negative |
| Q9ZG90 | KKDSTATKNPIPEVSKAKAS | Negative |
| Q9ZG90 | RKTKFWLVLSLIATSLSIFA | Negative |
| Q9ZG90 | TKFWLVLSLIATSLSIFACK | Negative |
| Q9ZG90 | KDSTATKNPIPEVSKAKAST | Negative |
| Q9ZG90 | TATKNPIPEVSKAKASTKLL | Negative |
| Q9ZG90 | SIFACKKDSTATKNPIPEVS | Negative |
| Q9ZG90 | SLIATSLSIFACKKDSTATK | Negative |
| Q9ZG90 | ATSLSIFACKKDSTATKNPI | Negative |
| Q9ZG90 | KTKFWLVLSLIATSLSIFAC | Negative |
| Q9ZG90 | DSTATKNPIPEVSKAKASTK | Negative |
| Q9ZG90 | ACKKDSTATKNPIPEVSKAK | Negative |
| Q9ZG90 | WLVLSLIATSLSIFACKKDS | Negative |
| Q9ZG90 | VLSLIATSLSIFACKKDSTA | Negative |
| Q9ZG90 | IATSLSIFACKKDSTATKNP | Negative |
| Q9ZG90 | CKKDSTATKNPIPEVSKAKA | Negative |
| Q9ZG90 | IFACKKDSTATKNPIPEVSK | Negative |
| Q9ZG90 | SLSIFACKKDSTATKNPIPE | Negative |
| Q9ZG90 | MRKTKFWLVLSLIATSLSIF | Negative |
| Q9ZG90 | TSLSIFACKKDSTATKNPIP | Negative |

|        |                        |          |
|--------|------------------------|----------|
| Q9ZG90 | LVLSLIATSLSIFACKKDST   | Negative |
| Q9ZG90 | LIATSLSIFACKKDSTATKN   | Negative |
| Q9ZG90 | TKNPIPEVSKAKASTKLLNA   | Negative |
| Q9ZG90 | STATKNPIPEVSKAKASTKL   | Negative |
| Q9ZG90 | ATKNPIPEVSKAKASTKLLN   | Negative |
| Q9ZG90 | KNPIPEVSKAKASTKLLNAT   | Negative |
| Q9ZG90 | LSIFACKKDSTATKNPIPEV   | Negative |
| Q9ZG90 | LSLIATSLSIFACKKDSTAT   | Negative |
| Q9ZG90 | KFWLVLSLIATSLSIFACKK   | Negative |
| Q9ZG90 | FWLVLSLIATSLSIFACKKD   | Negative |
| Q9ZG90 | FACKKDSTATKNPIPEVSKA   | Negative |
| Q9ZT16 | SKIVQVFLMLALFATSALAQ   | Negative |
| Q9ZT16 | ALFATSALAQAPAPTPTATP   | Negative |
| Q9ZT16 | PTATPPPATPPP VATPPPVA  | Negative |
| Q9ZT16 | MGSKIVQVFLMLALFATSAL   | Negative |
| Q9ZT16 | TATPPPATPPP VATPPP VAT | Negative |
| Q9ZT16 | LAQAPAPTPTATPPPATPPP   | Negative |
| Q9ZT16 | PAPTPTATPPPATPPP VATP  | Negative |
| Q9ZT16 | PTPTATPPPATPPP VATPPP  | Negative |
| Q9ZT16 | TSALAQAPAPTPTATPPPAT   | Negative |
| Q9ZT16 | ALAQAPAPTPTATPPPATPP   | Negative |
| Q9ZT16 | LALFATSALAQAPAPTPTAT   | Negative |
| Q9ZT16 | LFATSALAQAPAPTPTATPP   | Negative |
| Q9ZT16 | ATPPPATPPP VATPPP VATP | Negative |
| Q9ZT16 | FATSALAQAPAPTPTATPPP   | Negative |
| Q9ZT16 | GSKIVQVFLMLALFATSALA   | Negative |
| Q9ZT16 | IVQVFLMLALFATSALAQAP   | Negative |
| Q9ZT16 | TPTATPPPATPPP VATPPP V | Negative |
| Q9ZT16 | VQVFLMLALFATSALAQAPA   | Negative |
| Q9ZT16 | QAPAPTPTATPPPATPPPVA   | Negative |
| Q9ZT16 | FLMLALFATSALAQAPAPTPT  | Negative |
| Q9ZT16 | AQAPAPTPTATPPPATPPP V  | Negative |
| Q9ZT16 | MLALFATSALAQAPAPTPTA   | Negative |
| Q9ZT16 | APAPTPTATPPPATPPP VAT  | Negative |
| Q9ZT16 | SALAQAPAPTPTATPPPATP   | Negative |
| Q9ZT16 | ATSALAQAPAPTPTATPPPA   | Negative |
| Q9ZT16 | LMLALFATSALAQAPAPTPT   | Negative |
| Q9ZT16 | VFLMLALFATSALAQAPAPT   | Negative |
| Q9ZT16 | KIVQVFLMLALFATSALAQ    | Negative |
| Q9ZT16 | APTPTATPPPATPPP VATPP  | Negative |
| Q9ZT64 | LLGFQVTTARLDRNNFPSDF   | Negative |
| Q9ZT64 | LGFQVTTARLDRNNFPSDFM   | Negative |
| Q9ZT64 | YSLLGQVTTARLDRNNFPS    | Negative |
| Q9ZT64 | LMWVLLFYSLLGQVTTARL    | Negative |
| Q9ZT64 | FPSDFMFGTASSAYQYEGAV   | Negative |
| Q9ZT64 | NNFPSDFMFGTASSAYQYEG   | Negative |

|        |                      |          |
|--------|----------------------|----------|
| Q9ZT64 | VLMWVLLFYSSLGFQVTTAR | Negative |
| Q9ZT64 | WVLLFYSSLGFQVTTARLDR | Negative |
| Q9ZT64 | RLDRNNFPSDFMFGTASSAY | Negative |
| Q9ZT64 | TARLDRNNFPSDFMFGTASS | Negative |
| Q9ZT64 | LDRNNFPSDFMFGTASSAYQ | Negative |
| Q9ZT64 | MEVSVLMWVLLFYSSLGFQV | Negative |
| Q9ZT64 | SLLGFQVTTARLDRNNFPSD | Negative |
| Q9ZT64 | SVLMWVLLFYSSLGFQVTTA | Negative |
| Q9ZT64 | EVSVLMWVLLFYSSLGFQVT | Negative |
| Q9ZT64 | LLFYSSLGFQVTTARLDRNN | Negative |
| Q9ZT64 | NFPSDFMFGTASSAYQYEGA | Negative |
| Q9ZT64 | ARLDRNNFPSDFMFGTASSA | Negative |
| Q9ZT64 | FYSSLGFQVTTARLDRNNFP | Negative |
| Q9ZT64 | RNNFPSDFMFGTASSAYQYE | Negative |
| Q9ZT64 | VTTARLDRNNFPSDFMFGTA | Negative |
| Q9ZT64 | GFQVTTARLDRNNFPSDFMF | Negative |
| Q9ZT64 | MWVLLFYSSLGFQVTTARLD | Negative |
| Q9ZT64 | TTARLDRNNFPSDFMFGTAS | Negative |
| Q9ZT64 | QVTTARLDRNNFPSDFMFGT | Negative |
| Q9ZT64 | VSVLMWVLLFYSSLGFQVTT | Negative |
| Q9ZT64 | FQVTTARLDRNNFPSDFMFG | Negative |
| Q9ZT64 | DRNNFPSDFMFGTASSAYQY | Negative |
| Q9ZT64 | LFYSSLGFQVTTARLDRNNF | Negative |
| Q9ZT66 | QCLDNPPDRSIHGRQLAEAG | Negative |
| Q9ZT66 | VLLCLAAVLAAAAATTAEAH | Negative |
| Q9ZT66 | CLAAVLAAAAATTAEAHQC  | Negative |
| Q9ZT66 | AQVLLCLAAVLAAAAATTAE | Negative |
| Q9ZT66 | SAQVLLCLAAVLAAAAATTA | Negative |
| Q9ZT66 | TAEAHSQCLDNPPDRSIHGR | Negative |
| Q9ZT66 | HSQCLDNPPDRSIHGRQLAE | Negative |
| Q9ZT66 | LAAAAATTAEAHSQCLDNPP | Negative |
| Q9ZT66 | AATTAEAHSQCLDNPPDRSI | Negative |
| Q9ZT66 | ATTAEAHSQCLDNPPDRSIH | Negative |
| Q9ZT66 | LDNPPDRSIHGRQLAEAGEV | Negative |
| Q9ZT66 | LAAVLAAAAATTAEAHSQCL | Negative |
| Q9ZT66 | AVLAAAAATTAEAHSQCLDN | Negative |
| Q9ZT66 | AAVLAAAAATTAEAHSQCLD | Negative |
| Q9ZT66 | SQCLDNPPDRSIHGRQLAEA | Negative |
| Q9ZT66 | AEAHSQCLDNPPDRSIHGRQ | Negative |
| Q9ZT66 | LLCLAAVLAAAAATTAEHS  | Negative |
| Q9ZT66 | AAAATTAEAHSQCLDNPPDR | Negative |
| Q9ZT66 | SSAQVLLCLAAVLAAAAATT | Negative |
| Q9ZT66 | LCLAAVLAAAAATTAEHSQ  | Negative |
| Q9ZT66 | EAHSQCLDNPPDRSIHGRQL | Negative |
| Q9ZT66 | VLAAAAATTAEAHSQCLDNP | Negative |
| Q9ZT66 | MPSSAQVLLCLAAVLAAAAA | Negative |



|        |                       |          |
|--------|-----------------------|----------|
| Q9ZT66 | TTAEAHSQCLDNPPDRSIHG  | Negative |
| Q9ZT66 | QVLLCLAAVLAAAAATTAEA  | Negative |
| Q9ZT66 | AHSQCLDNPPDRSIHGRQLA  | Negative |
| Q9ZT66 | AAAAATTAEAHSQCLDNPPD  | Negative |
| Q9ZT66 | AAATTAEAHSQCLDNPPDRS  | Negative |
| Q9ZT66 | PSSAQVLLCLAAVLAAAAAT  | Negative |
| Q9ZWA9 | APFPNACHFSQINSLAPAQA  | Negative |
| Q9ZWA9 | FFHGAEARQREAPFPNACHF  | Negative |
| Q9ZWA9 | KLLFSLLSVVSLSFLLFFHG  | Negative |
| Q9ZWA9 | SLSFLLFFHGAEARQREAPF  | Negative |
| Q9ZWA9 | LSVVSLSFLLFFHGAEARQR  | Negative |
| Q9ZWA9 | ARQREAPFPNACHFSQINSL  | Negative |
| Q9ZWA9 | EARQREAPFPNACHFSQINS  | Negative |
| Q9ZWA9 | FLLFFHGAEARQREAPFPNA  | Negative |
| Q9ZWA9 | SLLSVVSLSFLLFFHGAEAR  | Negative |
| Q9ZWA9 | FSLLSVVSLSFLLFFHGAEA  | Negative |
| Q9ZWA9 | FHGAEARQREAPFPNACHFS  | Negative |
| Q9ZWA9 | SFLLFFHGAEARQREAPFPN  | Negative |
| Q9ZWA9 | GAEARQREAPFPNACHFSQI  | Negative |
| Q9ZWA9 | VSLSFLLFFHGAEARQREAP  | Negative |
| Q9ZWA9 | LLFSLLSVVSLSFLLFFHGA  | Negative |
| Q9ZWA9 | REAPFPNACHFSQINSLAPA  | Negative |
| Q9ZWA9 | LLFFHGAEARQREAPFPNAC  | Negative |
| Q9ZWA9 | RQREAPFPNACHFSQINSLA  | Negative |
| Q9ZWA9 | LFFHGAEARQREAPFPNACH  | Negative |
| Q9ZWA9 | SVVSLSFLLFFHGAEARQRE  | Negative |
| Q9ZWA9 | LSFLLFFHGAEARQREAPFP  | Negative |
| Q9ZWA9 | AEARQREAPFPNACHFSQIN  | Negative |
| Q9ZWA9 | HKLLFSLLSVVSLSFLLFFH  | Negative |
| Q9ZWA9 | HGAEARQREAPFPNACHFSQ  | Negative |
| Q9ZWA9 | LFSLLSVVSLSFLLFFHGAE  | Negative |
| Q9ZWA9 | QREAPFPNACHFSQINSLAP  | Negative |
| Q9ZWA9 | LLSVVSLSFLLFFHGAEARQ  | Negative |
| Q9ZWA9 | EAPFPNACHFSQINSLAPAQ  | Negative |
| Q9ZWA9 | MHKLLFSLLSVVSLSFLLFF  | Negative |
| U6A629 | LLPLLASYASAVTISVAKSG  | Negative |
| U6A629 | NVTTGLQYGAMEEEEINHCGE | Negative |
| U6A629 | SYASAVTISVAKSGGNVTTG  | Negative |
| U6A629 | YASAVTISVAKSGGNVTTGL  | Negative |
| U6A629 | PLLASYASAVTISVAKSGGN  | Negative |
| U6A629 | VTTGLQYGAMEEEEINHCGE  | Negative |
| U6A629 | AKSGGNVTTGLQYGAMEEEI  | Negative |
| U6A629 | GGNVTTGLQYGAMEEEEINHC | Negative |
| U6A629 | MLAEYLLLPLLASYASAVTI  | Negative |
| U6A629 | VAKSGGNVTTGLQYGAMEEE  | Negative |
| U6A629 | TISVAKSGGNVTTGLQYGAM  | Negative |

|        |                       |          |
|--------|-----------------------|----------|
| U6A629 | SGGNVTTGLQYGAMEEEINH  | Negative |
| U6A629 | KSGGNVTTGLQYGAMEEEIN  | Negative |
| U6A629 | EYLLPLLASYSASAVTISVA  | Negative |
| U6A629 | YLLPLLASYSASAVTISVAK  | Negative |
| U6A629 | AVTISVAKSGGNVTTGLQYG  | Negative |
| U6A629 | SAVTISVAKSGGNVTTGLQY  | Negative |
| U6A629 | VTISVAKSGGNVTTGLQYGA  | Negative |
| U6A629 | LPLLASYSASAVTISVAKSGG | Negative |
| U6A629 | GNVTTGLQYGAMEEEINHCG  | Negative |
| U6A629 | SVAKSGGNVTTGLQYGAMEE  | Negative |
| U6A629 | TTGLQYGAMEEEINHCHEGG  | Negative |
| U6A629 | ISVAKSGGNVTTGLQYGAME  | Negative |
| U6A629 | LAEYLLPLLASYSASAVTIS  | Negative |
| U6A629 | LASYASAVTISVAKSGGNVT  | Negative |
| U6A629 | ASAVTISVAKSGGNVTTGLQ  | Negative |
| U6A629 | ASYASAVTISVAKSGGNVTT  | Negative |
| U6A629 | LLASYASAVTISVAKSGGNV  | Negative |
| U6A629 | LLLPLLASYSASAVTISVAKS | Negative |
| U6BLZ9 | WAIALGLVARSSLVSAGPCD  | Negative |
| U6BLZ9 | QLNRNYAWAIALGLVARSSL  | Negative |
| U6BLZ9 | RNYAWAIALGLVARSSLVSA  | Negative |
| U6BLZ9 | DIYASGGTPCVAAHGTTRAL  | Negative |
| U6BLZ9 | PQLNRNYAWAIALGLVARSS  | Negative |
| U6BLZ9 | AGPCDIYASGGTPCVAAHGT  | Negative |
| U6BLZ9 | GPCDIYASGGTPCVAAHGTT  | Negative |
| U6BLZ9 | NRNYAWAIALGLVARSSLVS  | Negative |
| U6BLZ9 | LGLVARSSLVSAGPCDIYAS  | Negative |
| U6BLZ9 | PCDIYASGGTPCVAAHGTTR  | Negative |
| U6BLZ9 | LVSAGPCDIYASGGTPCVAA  | Negative |
| U6BLZ9 | AWAIALGLVARSSLVSAGPC  | Negative |
| U6BLZ9 | VSAGPCDIYASGGTPCVAAH  | Negative |
| U6BLZ9 | SAGPCDIYASGGTPCVAAHG  | Negative |
| U6BLZ9 | LNRNYAWAIALGLVARSSLV  | Negative |
| U6BLZ9 | SSLVSAGPCDIYASGGTPCV  | Negative |
| U6BLZ9 | IALGLVARSSLVSAGPCDIY  | Negative |
| U6BLZ9 | MIPQLNRNYAWAIALGLVAR  | Negative |
| U6BLZ9 | NYAWAIALGLVARSSLVSAG  | Negative |
| U6BLZ9 | CDIYASGGTPCVAAHGTTRA  | Negative |
| U6BLZ9 | IPQLNRNYAWAIALGLVARS  | Negative |
| U6BLZ9 | ALGLVARSSLVSAGPCDIYA  | Negative |
| U6BLZ9 | SLVSAGPCDIYASGGTPCVA  | Negative |
| U6BLZ9 | YAWAIALGLVARSSLVSAGP  | Negative |
| U6BLZ9 | RSSLVSAGPCDIYASGGTPC  | Negative |
| U6BLZ9 | VARSSLVSAGPCDIYASGGT  | Negative |
| U6BLZ9 | LVARSSLVSAGPCDIYASGG  | Negative |
| U6BLZ9 | ARSSLVSAGPCDIYASGGTP  | Negative |

|        |                       |          |
|--------|-----------------------|----------|
| U6BLZ9 | GLVARSSLVSAGPCDIYASG  | Negative |
| V5NC32 | IANGAITYQHPDDLPSNVNY  | Negative |
| V5NC32 | ITYQHPDDLPSNVNYDFIVA  | Negative |
| V5NC32 | YQHPDDLPSNVNYDFIVAGG  | Negative |
| V5NC32 | PRVVRLNSRLVSFALLGLQI  | Negative |
| V5NC32 | FALLGLQIANGAITYQHPDD  | Negative |
| V5NC32 | TYQHPDDLPSNVNYDFIVAG  | Negative |
| V5NC32 | ANGAITYQHPDDLPSNVNYD  | Negative |
| V5NC32 | LVSFALLGLQIANGAITYQH  | Negative |
| V5NC32 | RLNSRLVSFALLGLQIANGA  | Negative |
| V5NC32 | QHPDDLPSNVNYDFIVAGGG  | Negative |
| V5NC32 | VSFALLGLQIANGAITYQHP  | Negative |
| V5NC32 | RVVRLNSRLVSFALLGLQIA  | Negative |
| V5NC32 | LNSRLVSFALLGLQIANGAI  | Negative |
| V5NC32 | NSRLVSFALLGLQIANGAIT  | Negative |
| V5NC32 | MFPRVVRLNSRLVSFALLGL  | Negative |
| V5NC32 | GAITYQHPDDLPSNVNYDFI  | Negative |
| V5NC32 | SFALLGLQIANGAITYQHPD  | Negative |
| V5NC32 | NGAITYQHPDDLPSNVNYDF  | Negative |
| V5NC32 | QIANGAITYQHPDDLPSNVN  | Negative |
| V5NC32 | VVRLNSRLVSFALLGLQIAN  | Negative |
| V5NC32 | GLQIANGAITYQHPDDLPSN  | Negative |
| V5NC32 | LGLQIANGAITYQHPDDLPS  | Negative |
| V5NC32 | ALLGLQIANGAITYQHPDDL  | Negative |
| V5NC32 | VRLNSRLVSFALLGLQIANG  | Negative |
| V5NC32 | SRLVSFALLGLQIANGAITY  | Negative |
| V5NC32 | LLGLQIANGAITYQHPDDL   | Negative |
| V5NC32 | FPRVVRLNSRLVSFALLGLQ  | Negative |
| V5NC32 | AITYQHPDDLPSNVNYDFIV  | Negative |
| V5NC32 | LQIANGAITYQHPDDLPSNV  | Negative |
| V5YM14 | LLAAQIAQAGEGMWVPQQLP  | Negative |
| V5YM14 | IAQAGEGMWVPQQLPEIAGP  | Negative |
| V5YM14 | GEGMWVPQQLPEIAGPLKKA  | Negative |
| V5YM14 | AQIAQAGEGMWVPQQLPEIA  | Negative |
| V5YM14 | AVPLSLLAAQIAQAGEGMWV  | Negative |
| V5YM14 | MWVPQQLPEIAGPLKKAGLK  | Negative |
| V5YM14 | RPNLLAAAIAPVPLSLLAAQI | Negative |
| V5YM14 | LAAAIAPVPLSLLAAQIAQAG | Negative |
| V5YM14 | AAQIAQAGEGMWVPQQLPEI  | Negative |
| V5YM14 | GMWVPQQLPEIAGPLKKAGL  | Negative |
| V5YM14 | QIAQAGEGMWVPQQLPEIAG  | Negative |
| V5YM14 | EGMWVPQQLPEIAGPLKKAG  | Negative |
| V5YM14 | LLAAAIAPVPLSLLAAQIAQA | Negative |
| V5YM14 | LAAQIAQAGEGMWVPQQLPE  | Negative |
| V5YM14 | PLSLLAAQIAQAGEGMWVPQ  | Negative |
| V5YM14 | AAAIAPVPLSLLAAQIAQAGE | Negative |

|        |                       |          |
|--------|-----------------------|----------|
| V5YM14 | AGEGMWVPQQLPEIAGPLKK  | Negative |
| V5YM14 | AQAGEGMWVPQQLPEIAGPL  | Negative |
| V5YM14 | PNLLAAAIAPVLSLLAAQIA  | Negative |
| V5YM14 | LSLLAAQIAQAGEGMWVPQQ  | Negative |
| V5YM14 | MRPNLLAAAIAPVLSLLAAQ  | Negative |
| V5YM14 | AIAPVLSLLAAQIAQAGEGM  | Negative |
| V5YM14 | AAIAPVLSLLAAQIAQAGEG  | Negative |
| V5YM14 | NLLAAAIAPVLSLLAAQIAQ  | Negative |
| V5YM14 | VPQQLPEIAGPLKKAGLKL   | Negative |
| V5YM14 | SLLAAQIAQAGEGMWVPQQL  | Negative |
| V5YM14 | WVPQQLPEIAGPLKKAGLKL  | Negative |
| V5YM14 | VPLSLLAAQIAQAGEGMWVP  | Negative |
| V5YM14 | QAGEGMWVPQQLPEIAGPLK  | Negative |
| W0HJ53 | VAACAAVTAFALPNELEKRA  | Negative |
| W0HJ53 | KRAITSNEQGTNNGYFYFSFW | Negative |
| W0HJ53 | RAITSNEQGTNNGYFYFSFWT | Negative |
| W0HJ53 | TSNEQGTNNGYFYFSFWTNGG | Negative |
| W0HJ53 | CAAVTAFALPNELEKRAITS  | Negative |
| W0HJ53 | LFVAACAAVTAFALPNELEK  | Negative |
| W0HJ53 | TAFALPNELEKRAITSNEQG  | Negative |
| W0HJ53 | AVTAFALPNELEKRAITSNE  | Negative |
| W0HJ53 | VTAFALPNELEKRAITSNEQ  | Negative |
| W0HJ53 | FALPNELEKRAITSNEQGTN  | Negative |
| W0HJ53 | PNELEKRAITSNEQGTNNGY  | Negative |
| W0HJ53 | EKRAITSNEQGTNNGYFYFSF | Negative |
| W0HJ53 | AACAAVTAFALPNELEKRAI  | Negative |
| W0HJ53 | ITSNEQGTNNGYFYFSFWTNG | Negative |
| W0HJ53 | AFALPNELEKRAITSNEQGT  | Negative |
| W0HJ53 | NELEKRAITSNEQGTNNGYF  | Negative |
| W0HJ53 | AITSNQGTNNGYFYFSFWTN  | Negative |
| W0HJ53 | VSFSSLFVAACAAVTAFALP  | Negative |
| W0HJ53 | LPNELEKRAITSNEQGTNNG  | Negative |
| W0HJ53 | ACAAVTAFALPNELEKRAIT  | Negative |
| W0HJ53 | ELEKRAITSNEQGTNNGYFY  | Negative |
| W0HJ53 | SFSSLFVAACAAVTAFALPN  | Negative |
| W0HJ53 | FVAACAAVTAFALPNELEKR  | Negative |
| W0HJ53 | MVSFSSLFVAACAAVTAFAL  | Negative |
| W0HJ53 | ALPNELEKRAITSNEQGTNN  | Negative |
| W0HJ53 | LEKRAITSNEQGTNNGYFY   | Negative |
| W0HJ53 | SSLFVAACAAVTAFALPNEL  | Negative |
| W0HJ53 | SLFVAACAAVTAFALPNELE  | Negative |
| W0HJ53 | FSSLFVAACAAVTAFALPNE  | Negative |
| W1I921 | AAVMCVGVLGLSKLCGADSC  | Negative |
| W1I921 | AHFFAAVMCVGVLGLSKLCG  | Negative |
| W1I921 | ADSCEYPDCVFTGLPRSSGV  | Negative |
| W1I921 | CGADSCEYPDCVFTGLPRSS  | Negative |

|        |                       |          |
|--------|-----------------------|----------|
| W1I921 | GADSCEYPDCVFTGLPRSSG  | Negative |
| W1I921 | DSCEYPDCVFTGLPRSSGVE  | Negative |
| W1I921 | CEYPDCVFTGLPRSSGVERY  | Negative |
| W1I921 | LCGADSCEYPDCVFTGLPRS  | Negative |
| W1I921 | KLCGADSCEYPDCVFTGLPR  | Negative |
| W1I921 | GLSKLCGADSCEYPDCVFTG  | Negative |
| W1I921 | FFAAVMCVGVLGLSKLCGAD  | Negative |
| W1I921 | LGLSKLCGADSCEYPDCVFT  | Negative |
| W1I921 | LSKLCGADSCEYPDCVFTGL  | Negative |
| W1I921 | TFQAHFFAAVMCVGVLGLSK  | Negative |
| W1I921 | FAAVMCVGVLGLSKLCGADS  | Negative |
| W1I921 | GVLGLSKLCGADSCEYPDCV  | Negative |
| W1I921 | AVMCVGVLGLSKLCGADSCE  | Negative |
| W1I921 | VGVLGLSKLCGADSCEYPDC  | Negative |
| W1I921 | CVGVLGLSKLCGADSCEYPD  | Negative |
| W1I921 | EYPDCVFTGLPRSSGVERYI  | Negative |
| W1I921 | SKLCGADSCEYPDCVFTGLP  | Negative |
| W1I921 | QAHFFAAVMCVGVLGLSKLC  | Negative |
| W1I921 | VLGLSKLCGADSCEYPDCVF  | Negative |
| W1I921 | ATFQAHFFAAVMCVGVLGLS  | Negative |
| W1I921 | FQAHFFAAVMCVGVLGLSKL  | Negative |
| W1I921 | SCEYPDCVFTGLPRSSGVER  | Negative |
| W1I921 | MATFQAHFFAAVMCVGVLGL  | Negative |
| W1I921 | HFFAAVMCVGVLGLSKLCGA  | Negative |
| W1I921 | MCVGVLGLSKLCGADSCEYP  | Negative |
| W5XCJ6 | GLLVFVLSLSGTGADCPSDW  | Negative |
| W5XCJ6 | SSDEEHHCYYVFLLFTWEEA  | Negative |
| W5XCJ6 | CPSDWSSDEEHHCYYVFLLF  | Negative |
| W5XCJ6 | VSFGLLVFVLSLSGTGADCP  | Negative |
| W5XCJ6 | VVFLSLSGTGADCPSDWSSD  | Negative |
| W5XCJ6 | LSGTGADCPSDWSSDEEHCY  | Negative |
| W5XCJ6 | RIIFVSFGLLVVFLSLSGTG  | Negative |
| W5XCJ6 | FVSFGLLVVFLSLSGTGADC  | Negative |
| W5XCJ6 | FLSLSGTGADCPSDWSSDEE  | Negative |
| W5XCJ6 | MGRIFVSFGLLVVFLSLSG   | Negative |
| W5XCJ6 | LSLSGTGADCPSDWSSDEEH  | Negative |
| W5XCJ6 | GTGADCPSDWSSDEEHHCYYV | Negative |
| W5XCJ6 | SFGLLVVFLSLSGTGADCPS  | Negative |
| W5XCJ6 | LVVFLSLSGTGADCPSDWSS  | Negative |
| W5XCJ6 | IIFVSFGLLVVFLSLSGTGA  | Negative |
| W5XCJ6 | SDWSSDEEHHCYYVFLLFTW  | Negative |
| W5XCJ6 | VFLSLSGTGADCPSDWSSDE  | Negative |
| W5XCJ6 | DCPSDWSSDEEHHCYYVFLL  | Negative |
| W5XCJ6 | PSDWSSDEEHHCYYVFLLFT  | Negative |
| W5XCJ6 | SLSGTGADCPSDWSSDEEHC  | Negative |
| W5XCJ6 | ADCPSDWSSDEEHHCYYVFFL | Negative |

|        |                      |          |
|--------|----------------------|----------|
| W5XCJ6 | LLVVFLSLSGTGADCPDWS  | Negative |
| W5XCJ6 | SGTGADCPDWSDEEHCYY   | Negative |
| W5XCJ6 | DWSSDEEHCYYVFFLLFTWE | Negative |
| W5XCJ6 | GRIIFVSFGLLVVFLSLSGT | Negative |
| W5XCJ6 | IFVSFGLLVVFLSLSGTGAD | Negative |
| W5XCJ6 | WSSDEEHCYYVFFLLFTWEE | Negative |
| W5XCJ6 | TGADCPDWSDEEHCYYVF   | Negative |
| W5XCJ6 | GADCPDWSDEEHCYYVFF   | Negative |
| W5XDM0 | DCLPGWSFYEGGCYYVFDVK | Negative |
| W5XDM0 | SVSFGLLVVFLSLSGTGADQ | Negative |
| W5XDM0 | GLLVVFLSLSGTGADQDCLP | Negative |
| W5XDM0 | FLSLSGTGADQDCLPGWSFY | Negative |
| W5XDM0 | GWSFYEGGCYYVFDVKTWED | Negative |
| W5XDM0 | SLSGTGADQDCLPGWSFYEG | Negative |
| W5XDM0 | TGADQDCLPGWSFYEGGCYY | Negative |
| W5XDM0 | DQDCLPGWSFYEGGCYYVFD | Negative |
| W5XDM0 | VSFGLLVVFLSLSGTGADQD | Negative |
| W5XDM0 | SGTGADQDCLPGWSFYEGGC | Negative |
| W5XDM0 | PGWSFYEGGCYYVFDVKTWE | Negative |
| W5XDM0 | SISVSFGLLVVFLSLSGTGA | Negative |
| W5XDM0 | GRSISVSFGLLVVFLSLSGT | Negative |
| W5XDM0 | RSISVSFGLLVVFLSLSGTG | Negative |
| W5XDM0 | QDCLPGWSFYEGGCYYVFDV | Negative |
| W5XDM0 | ADQDCLPGWSFYEGGCYYVF | Negative |
| W5XDM0 | GTGADQDCLPGWSFYEGGCY | Negative |
| W5XDM0 | LVVFLSLSGTGADQDCLPGW | Negative |
| W5XDM0 | LSLSGTGADQDCLPGWSFYE | Negative |
| W5XDM0 | GADQDCLPGWSFYEGGCYYV | Negative |
| W5XDM0 | CLPGWSFYEGGCYYVFDVKT | Negative |
| W5XDM0 | VFLSLSGTGADQDCLPGWSF | Negative |
| W5XDM0 | LPGWSFYEGGCYYVFDVKTW | Negative |
| W5XDM0 | VVFLSLSGTGADQDCLPGWS | Negative |
| W5XDM0 | MGRSISVSFGLLVVFLSLSG | Negative |
| W5XDM0 | LSGTGADQDCLPGWSFYEGG | Negative |
| W5XDM0 | SFGLLVVFLSLSGTGADQDC | Negative |
| W5XDM0 | ISVSFGLLVVFLSLSGTGAD | Negative |
| W5XDM0 | LLVVFLSLSGTGADQDCLPG | Negative |
| X2JCV5 | EEEFEEADYEEFLLIKNGL  | Negative |
| X2JCV5 | LFLAALESCADDKNPLEEEF | Negative |
| X2JCV5 | LLFLAALESCADDKNPLEEE | Negative |
| X2JCV5 | DDKNPLEEEFFEADYEEFLL | Negative |
| X2JCV5 | NVFFMFSLFLAALESCADD  | Negative |
| X2JCV5 | EEFEADYEEFLLIKNGLQQ  | Negative |
| X2JCV5 | NPLEEEFFEADYEEFLLIK  | Negative |
| X2JCV5 | MNVFFMFSLFLAALESCAD  | Negative |
| X2JCV5 | LAALESCADDKNPLEEEFFE | Negative |

|        |                       |          |
|--------|-----------------------|----------|
| X2JCV5 | FFEADYEEFLLI AKNGLQQT | Negative |
| X2JCV5 | MFSLLFLAALESCADDKNPL  | Negative |
| X2JCV5 | ADDKNPLEEEFFEADYEEFL  | Negative |
| X2JCV5 | LEEEFFEADYEEFLLI AKNG | Negative |
| X2JCV5 | DKNPLEEEFFEADYEEFLLI  | Negative |
| X2JCV5 | FEADYEEFLLI AKNGLQQTS | Negative |
| X2JCV5 | PLEEEFFEADYEEFLLI AKN | Negative |
| X2JCV5 | FLAALESCADDKNPLEEEFF  | Negative |
| X2JCV5 | CADDKNPLEEEFFEADYEEF  | Negative |
| X2JCV5 | EEFFEADYEEFLLI AKNGLQ | Negative |
| X2JCV5 | LESCADDKNPLEEEFFEADY  | Negative |
| X2JCV5 | VFFMFSLLFLAALESCADDK  | Negative |
| X2JCV5 | ALESCADDKNPLEEEFFEAD  | Negative |
| X2JCV5 | KNPLEEEFFEADYEEFLLI A | Negative |
| X2JCV5 | AALESCADDKNPLEEEFFEA  | Negative |
| X2JCV5 | ESCADDKNPLEEEFFEADYE  | Negative |
| X2JCV5 | SCADDKNPLEEEFFEADYEE  | Negative |
| X2JCV5 | FMFSLLFLAALESCADDKNP  | Negative |
| X2JCV5 | FSLFLAALESCADDKNPLE   | Negative |
| X2JCV5 | SLLFLAALESCADDKNPLEE  | Negative |
