# Supplementary material for: Identification and analysis of the cleavage site in a signal peptide using SMOTE, dagging, and feature selection methods
Source: Royal Society of Chemistry journal article supplement (doi:10.1039/c7mo00030h), 2017-12-20
Supplement: c7mo00030h1.zip [file c7mo00030h1.zip]

**Supplementary Material S5.** *SNs, SPs, ACCs*, and Youden's Indexs obtained from the Dagging, RF classifiers and IFS method across different numbers of features.

**(1) Dagging**

| <b>Number of features</b> | <b><i>SN</i></b> | <b><i>SP</i></b> | <b><i>ACC</i></b> | <b>Youden's Index</b> |
|---------------------------|------------------|------------------|-------------------|-----------------------|
| 10                        | 0.761            | 0.526            | 0.534             | 0.287                 |
| 20                        | 0.754            | 0.581            | 0.587             | 0.335                 |
| 30                        | 0.787            | 0.620            | 0.625             | 0.407                 |
| 40                        | 0.799            | 0.624            | 0.630             | 0.423                 |
| 50                        | 0.810            | 0.667            | 0.672             | 0.477                 |
| 60                        | 0.808            | 0.675            | 0.679             | 0.483                 |
| 70                        | 0.833            | 0.701            | 0.705             | 0.534                 |
| 80                        | 0.832            | 0.708            | 0.712             | 0.539                 |
| 90                        | 0.842            | 0.724            | 0.728             | 0.566                 |
| 100                       | 0.840            | 0.727            | 0.731             | 0.567                 |
| 110                       | 0.841            | 0.736            | 0.740             | 0.577                 |
| 120                       | 0.840            | 0.744            | 0.747             | 0.584                 |
| 130                       | 0.845            | 0.751            | 0.754             | 0.596                 |
| 140                       | 0.840            | 0.762            | 0.765             | 0.603                 |
| 150                       | 0.840            | 0.763            | 0.766             | 0.603                 |
| 160                       | 0.844            | 0.768            | 0.771             | 0.612                 |
| 170                       | 0.837            | 0.777            | 0.779             | 0.614                 |
| 180                       | 0.837            | 0.783            | 0.784             | 0.619                 |
| 190                       | 0.836            | 0.786            | 0.787             | 0.622                 |
| 200                       | 0.837            | 0.790            | 0.792             | 0.628                 |
| 210                       | 0.836            | 0.807            | 0.808             | 0.643                 |
| 220                       | 0.834            | 0.820            | 0.821             | 0.654                 |
| 230                       | 0.837            | 0.823            | 0.824             | 0.660                 |
| 240                       | 0.832            | 0.830            | 0.830             | 0.663                 |
| 250                       | 0.837            | 0.858            | 0.857             | 0.695                 |
| 260                       | 0.849            | 0.871            | 0.870             | 0.720                 |
| 270                       | 0.846            | 0.885            | 0.883             | 0.731                 |
| 280                       | 0.843            | 0.892            | 0.890             | 0.735                 |
| 290                       | 0.861            | 0.920            | 0.918             | 0.781                 |
| 300                       | 0.862            | 0.921            | 0.919             | 0.783                 |
| 310                       | 0.862            | 0.923            | 0.921             | 0.786                 |
| 320                       | 0.864            | 0.924            | 0.922             | 0.788                 |
| 330                       | 0.870            | 0.926            | 0.924             | 0.796                 |
| 340                       | 0.868            | 0.927            | 0.925             | 0.796                 |
| 350                       | 0.868            | 0.927            | 0.925             | 0.795                 |
| 360                       | 0.872            | 0.928            | 0.926             | 0.800                 |

|     |       |       |       |       |
|-----|-------|-------|-------|-------|
| 370 | 0.868 | 0.928 | 0.926 | 0.796 |
| 380 | 0.871 | 0.929 | 0.927 | 0.800 |
| 390 | 0.873 | 0.930 | 0.928 | 0.802 |
| 400 | 0.876 | 0.930 | 0.928 | 0.805 |
| 410 | 0.872 | 0.930 | 0.928 | 0.802 |
| 420 | 0.875 | 0.930 | 0.928 | 0.805 |
| 430 | 0.874 | 0.931 | 0.929 | 0.804 |
| 440 | 0.876 | 0.930 | 0.928 | 0.806 |
| 450 | 0.877 | 0.930 | 0.928 | 0.807 |
| 460 | 0.876 | 0.931 | 0.929 | 0.807 |
| 470 | 0.879 | 0.930 | 0.928 | 0.809 |
| 480 | 0.879 | 0.931 | 0.929 | 0.810 |
| 490 | 0.879 | 0.931 | 0.929 | 0.810 |
| 500 | 0.881 | 0.931 | 0.929 | 0.811 |
| 510 | 0.876 | 0.932 | 0.930 | 0.808 |
| 520 | 0.880 | 0.931 | 0.929 | 0.811 |
| 530 | 0.882 | 0.932 | 0.930 | 0.814 |
| 540 | 0.881 | 0.931 | 0.930 | 0.812 |
| 550 | 0.876 | 0.932 | 0.930 | 0.807 |
| 560 | 0.882 | 0.931 | 0.930 | 0.813 |
| 570 | 0.882 | 0.932 | 0.930 | 0.814 |
| 580 | 0.886 | 0.932 | 0.930 | 0.817 |
| 590 | 0.884 | 0.933 | 0.931 | 0.818 |
| 600 | 0.885 | 0.933 | 0.932 | 0.818 |
| 610 | 0.883 | 0.934 | 0.932 | 0.817 |
| 620 | 0.886 | 0.933 | 0.932 | 0.819 |
| 630 | 0.887 | 0.934 | 0.933 | 0.821 |
| 640 | 0.884 | 0.933 | 0.932 | 0.818 |
| 650 | 0.887 | 0.935 | 0.933 | 0.822 |
| 660 | 0.896 | 0.939 | 0.937 | 0.834 |
| 670 | 0.896 | 0.939 | 0.937 | 0.835 |
| 680 | 0.895 | 0.940 | 0.939 | 0.835 |
| 690 | 0.905 | 0.948 | 0.947 | 0.853 |
| 700 | 0.907 | 0.949 | 0.948 | 0.856 |
| 710 | 0.907 | 0.949 | 0.948 | 0.856 |
| 720 | 0.911 | 0.951 | 0.950 | 0.862 |
| 730 | 0.911 | 0.952 | 0.951 | 0.863 |
| 740 | 0.912 | 0.952 | 0.951 | 0.864 |
| 750 | 0.913 | 0.953 | 0.951 | 0.865 |
| 760 | 0.911 | 0.953 | 0.951 | 0.864 |
| 770 | 0.911 | 0.953 | 0.952 | 0.864 |
| 780 | 0.916 | 0.953 | 0.952 | 0.869 |

|     |       |       |       |       |
|-----|-------|-------|-------|-------|
| 790 | 0.915 | 0.953 | 0.952 | 0.868 |
| 800 | 0.915 | 0.953 | 0.951 | 0.867 |
| 810 | 0.914 | 0.953 | 0.952 | 0.866 |
| 820 | 0.916 | 0.952 | 0.951 | 0.869 |
| 830 | 0.912 | 0.953 | 0.952 | 0.865 |
| 840 | 0.915 | 0.953 | 0.951 | 0.867 |
| 850 | 0.912 | 0.953 | 0.952 | 0.866 |
| 851 | 0.915 | 0.954 | 0.953 | 0.869 |
| 852 | 0.911 | 0.953 | 0.952 | 0.865 |
| 853 | 0.914 | 0.953 | 0.952 | 0.867 |
| 854 | 0.912 | 0.953 | 0.952 | 0.865 |
| 855 | 0.913 | 0.953 | 0.952 | 0.866 |
| 856 | 0.915 | 0.953 | 0.952 | 0.869 |
| 857 | 0.910 | 0.953 | 0.952 | 0.863 |
| 858 | 0.914 | 0.953 | 0.951 | 0.867 |
| 859 | 0.911 | 0.953 | 0.952 | 0.864 |
| 860 | 0.913 | 0.953 | 0.952 | 0.866 |
| 861 | 0.913 | 0.953 | 0.952 | 0.866 |
| 862 | 0.912 | 0.953 | 0.952 | 0.866 |
| 863 | 0.912 | 0.953 | 0.952 | 0.865 |
| 864 | 0.912 | 0.953 | 0.952 | 0.866 |
| 865 | 0.912 | 0.954 | 0.952 | 0.866 |
| 866 | 0.914 | 0.954 | 0.952 | 0.868 |
| 867 | 0.914 | 0.953 | 0.952 | 0.867 |
| 868 | 0.915 | 0.954 | 0.952 | 0.869 |
| 869 | 0.916 | 0.953 | 0.952 | 0.869 |
| 870 | 0.917 | 0.953 | 0.952 | 0.871 |
| 871 | 0.912 | 0.954 | 0.952 | 0.865 |
| 872 | 0.913 | 0.954 | 0.953 | 0.868 |
| 873 | 0.915 | 0.954 | 0.953 | 0.870 |
| 874 | 0.912 | 0.955 | 0.953 | 0.867 |
| 875 | 0.915 | 0.954 | 0.953 | 0.870 |
| 876 | 0.912 | 0.954 | 0.952 | 0.865 |
| 877 | 0.913 | 0.954 | 0.953 | 0.867 |
| 878 | 0.916 | 0.954 | 0.953 | 0.870 |
| 879 | 0.915 | 0.954 | 0.953 | 0.869 |
| 880 | 0.911 | 0.955 | 0.953 | 0.865 |
| 881 | 0.914 | 0.954 | 0.953 | 0.869 |
| 882 | 0.911 | 0.954 | 0.952 | 0.865 |
| 883 | 0.911 | 0.954 | 0.953 | 0.865 |
| 884 | 0.914 | 0.954 | 0.953 | 0.868 |
| 885 | 0.911 | 0.954 | 0.953 | 0.866 |

|     |       |       |       |       |
|-----|-------|-------|-------|-------|
| 886 | 0.914 | 0.955 | 0.953 | 0.868 |
| 887 | 0.915 | 0.954 | 0.953 | 0.869 |
| 888 | 0.911 | 0.954 | 0.953 | 0.865 |
| 889 | 0.913 | 0.954 | 0.952 | 0.866 |
| 890 | 0.913 | 0.954 | 0.952 | 0.867 |
| 891 | 0.910 | 0.954 | 0.953 | 0.864 |
| 892 | 0.913 | 0.954 | 0.953 | 0.867 |
| 893 | 0.912 | 0.954 | 0.953 | 0.866 |
| 894 | 0.911 | 0.954 | 0.953 | 0.865 |
| 895 | 0.912 | 0.954 | 0.953 | 0.866 |
| 896 | 0.913 | 0.954 | 0.953 | 0.867 |
| 897 | 0.914 | 0.954 | 0.953 | 0.868 |
| 898 | 0.912 | 0.954 | 0.953 | 0.866 |
| 899 | 0.909 | 0.954 | 0.953 | 0.863 |
| 900 | 0.909 | 0.954 | 0.953 | 0.864 |
| 901 | 0.914 | 0.954 | 0.953 | 0.868 |
| 902 | 0.911 | 0.954 | 0.953 | 0.865 |
| 903 | 0.911 | 0.954 | 0.952 | 0.864 |
| 904 | 0.913 | 0.954 | 0.953 | 0.867 |
| 905 | 0.914 | 0.954 | 0.953 | 0.869 |
| 906 | 0.912 | 0.955 | 0.953 | 0.867 |
| 907 | 0.909 | 0.955 | 0.953 | 0.864 |
| 908 | 0.909 | 0.954 | 0.952 | 0.863 |
| 909 | 0.915 | 0.955 | 0.953 | 0.869 |
| 910 | 0.912 | 0.954 | 0.953 | 0.866 |
| 911 | 0.912 | 0.954 | 0.953 | 0.867 |
| 912 | 0.915 | 0.954 | 0.952 | 0.869 |
| 913 | 0.908 | 0.954 | 0.952 | 0.862 |
| 914 | 0.911 | 0.954 | 0.953 | 0.865 |
| 915 | 0.911 | 0.954 | 0.953 | 0.865 |
| 916 | 0.914 | 0.954 | 0.953 | 0.868 |
| 917 | 0.912 | 0.954 | 0.953 | 0.866 |
| 918 | 0.911 | 0.954 | 0.952 | 0.865 |
| 919 | 0.914 | 0.954 | 0.953 | 0.869 |
| 920 | 0.911 | 0.954 | 0.952 | 0.865 |

(2) RF

| Number of features | <i>SN</i> | <i>SP</i> | <i>ACC</i> | Youden's Index |
|--------------------|-----------|-----------|------------|----------------|
| 10                 | 0.126     | 0.992     | 0.963      | 0.118          |
| 20                 | 0.174     | 0.995     | 0.967      | 0.169          |
| 30                 | 0.260     | 0.993     | 0.969      | 0.254          |

|     |       |       |       |       |
|-----|-------|-------|-------|-------|
| 40  | 0.269 | 0.993 | 0.969 | 0.262 |
| 50  | 0.333 | 0.989 | 0.967 | 0.322 |
| 60  | 0.351 | 0.986 | 0.965 | 0.337 |
| 70  | 0.394 | 0.983 | 0.963 | 0.377 |
| 80  | 0.413 | 0.981 | 0.962 | 0.394 |
| 90  | 0.452 | 0.977 | 0.959 | 0.429 |
| 100 | 0.467 | 0.975 | 0.958 | 0.442 |
| 110 | 0.492 | 0.973 | 0.957 | 0.465 |
| 120 | 0.515 | 0.970 | 0.955 | 0.486 |
| 130 | 0.524 | 0.971 | 0.956 | 0.494 |
| 140 | 0.528 | 0.969 | 0.954 | 0.497 |
| 150 | 0.538 | 0.967 | 0.953 | 0.505 |
| 160 | 0.549 | 0.967 | 0.953 | 0.516 |
| 170 | 0.568 | 0.966 | 0.952 | 0.533 |
| 180 | 0.577 | 0.965 | 0.952 | 0.541 |
| 190 | 0.577 | 0.965 | 0.952 | 0.541 |
| 200 | 0.586 | 0.964 | 0.951 | 0.550 |
| 210 | 0.628 | 0.964 | 0.952 | 0.592 |
| 220 | 0.631 | 0.963 | 0.952 | 0.594 |
| 230 | 0.628 | 0.964 | 0.953 | 0.592 |
| 240 | 0.630 | 0.963 | 0.952 | 0.593 |
| 250 | 0.656 | 0.967 | 0.956 | 0.623 |
| 260 | 0.665 | 0.968 | 0.958 | 0.633 |
| 270 | 0.678 | 0.969 | 0.959 | 0.647 |
| 280 | 0.678 | 0.970 | 0.960 | 0.648 |
| 290 | 0.699 | 0.974 | 0.965 | 0.673 |
| 300 | 0.718 | 0.974 | 0.966 | 0.692 |
| 310 | 0.716 | 0.974 | 0.965 | 0.689 |
| 320 | 0.714 | 0.973 | 0.965 | 0.688 |
| 330 | 0.709 | 0.974 | 0.966 | 0.683 |
| 340 | 0.717 | 0.975 | 0.967 | 0.692 |
| 350 | 0.718 | 0.974 | 0.966 | 0.692 |
| 360 | 0.720 | 0.974 | 0.966 | 0.695 |
| 370 | 0.725 | 0.973 | 0.965 | 0.698 |
| 380 | 0.709 | 0.974 | 0.965 | 0.683 |
| 390 | 0.726 | 0.973 | 0.965 | 0.699 |
| 400 | 0.725 | 0.973 | 0.965 | 0.698 |
| 410 | 0.721 | 0.973 | 0.965 | 0.694 |
| 420 | 0.713 | 0.974 | 0.965 | 0.686 |
| 430 | 0.719 | 0.974 | 0.965 | 0.693 |
| 440 | 0.715 | 0.974 | 0.965 | 0.689 |
| 450 | 0.706 | 0.974 | 0.965 | 0.680 |

|     |       |       |       |       |
|-----|-------|-------|-------|-------|
| 460 | 0.717 | 0.974 | 0.965 | 0.691 |
| 470 | 0.706 | 0.974 | 0.965 | 0.679 |
| 480 | 0.708 | 0.974 | 0.965 | 0.682 |
| 490 | 0.710 | 0.974 | 0.965 | 0.684 |
| 500 | 0.699 | 0.973 | 0.964 | 0.672 |
| 510 | 0.714 | 0.974 | 0.965 | 0.688 |
| 520 | 0.716 | 0.974 | 0.966 | 0.690 |
| 530 | 0.710 | 0.974 | 0.965 | 0.684 |
| 540 | 0.709 | 0.974 | 0.965 | 0.683 |
| 550 | 0.718 | 0.974 | 0.966 | 0.692 |
| 560 | 0.706 | 0.974 | 0.965 | 0.680 |
| 570 | 0.705 | 0.974 | 0.965 | 0.679 |
| 580 | 0.701 | 0.975 | 0.965 | 0.676 |
| 590 | 0.709 | 0.975 | 0.966 | 0.684 |
| 600 | 0.706 | 0.974 | 0.965 | 0.680 |
| 610 | 0.702 | 0.974 | 0.965 | 0.675 |
| 620 | 0.711 | 0.974 | 0.966 | 0.685 |
| 630 | 0.715 | 0.975 | 0.966 | 0.690 |
| 640 | 0.714 | 0.976 | 0.967 | 0.689 |
| 650 | 0.707 | 0.976 | 0.967 | 0.683 |
| 660 | 0.705 | 0.977 | 0.968 | 0.682 |
| 670 | 0.702 | 0.978 | 0.968 | 0.679 |
| 680 | 0.710 | 0.978 | 0.969 | 0.687 |
| 690 | 0.717 | 0.981 | 0.972 | 0.698 |
| 700 | 0.723 | 0.981 | 0.973 | 0.704 |
| 710 | 0.726 | 0.981 | 0.973 | 0.707 |
| 720 | 0.710 | 0.981 | 0.972 | 0.691 |
| 730 | 0.714 | 0.981 | 0.972 | 0.696 |
| 740 | 0.704 | 0.982 | 0.972 | 0.686 |
| 750 | 0.714 | 0.982 | 0.973 | 0.697 |
| 760 | 0.710 | 0.981 | 0.972 | 0.692 |
| 770 | 0.709 | 0.981 | 0.972 | 0.690 |
| 780 | 0.714 | 0.982 | 0.973 | 0.696 |
| 790 | 0.706 | 0.981 | 0.972 | 0.688 |
| 800 | 0.713 | 0.983 | 0.974 | 0.696 |
| 810 | 0.712 | 0.983 | 0.973 | 0.694 |
| 820 | 0.703 | 0.982 | 0.973 | 0.686 |
| 830 | 0.711 | 0.983 | 0.974 | 0.694 |
| 840 | 0.717 | 0.982 | 0.973 | 0.699 |
| 850 | 0.712 | 0.982 | 0.973 | 0.694 |
| 860 | 0.714 | 0.983 | 0.974 | 0.697 |
| 870 | 0.720 | 0.985 | 0.977 | 0.705 |

|     |       |       |       |       |
|-----|-------|-------|-------|-------|
| 880 | 0.734 | 0.985 | 0.977 | 0.719 |
| 890 | 0.750 | 0.986 | 0.978 | 0.736 |
| 900 | 0.734 | 0.986 | 0.978 | 0.720 |
| 910 | 0.741 | 0.986 | 0.978 | 0.727 |
| 920 | 0.739 | 0.986 | 0.978 | 0.725 |
